# Supplementary material for: Clonal transcriptomics identifies mechanisms of chemoresistance and empowers rational design of combination therapies
Source: bioRxiv preprint, doi:10.1101/2021.12.09.471927, version 2 (2022-06-10)
Supplement: Supplementary Table 2 [file 471927_file04.xlsx]

## Sheet: cell_numbers_4T1
clone	Expt A - Vehicle			Expt B - Vehicle			Expt A - JQ1			Expt B - JQ1			Expt C - Vehicle			Expt D - Vehicle			Expt C - Docetaxel			Expt D - Docetaxel			Expt F - NSG (untreated)			Expt G - in vitro cultured cells	Expt A - Vehicle			Expt B - Vehicle			Expt A - JQ1			Expt B - JQ1			Expt C - Vehicle			Expt D - Vehicle			Expt C - Docetaxel
	JV1	JV2	JV3	JV4	JV5	JV6	J1	J2	J3	J4	J5	J6	DV1	DV2	DV3	DV4	DV5	DV6	D1	D2	D3	D4	D5	D6	NSG1	NSG2	NSG3	invitro	fraction.JV1	fraction.JV2	fraction.JV3	fraction.JV4	fraction.JV5	fraction.JV6	fraction.J1	fraction.J2	fraction.J3	fraction.J4	fraction.J5	fraction.J6	fraction.DV1	fraction.DV2	fraction.DV3	fraction.DV4	fraction.DV5	fraction.DV6	fraction.D1	fraction.D2	fraction.D3
2	3	0	0	0	0	0	3	5	31	0	0	0	6	0	2	0	0	0	6	2	1	0	0	0	0	0	0	28	0.00379267	0	0	0	0	0	0.00254669	0.00493583	0.0221587	0	0	0	0.0215054	0	0.00472813	0	0	0	0.00913242	0.00325733	0.0020202
5	0	0	0	0	0	0	1	0	0	0	0	0	0	0	0	0	0	0	0	0	0	0	0	0	0	0	0	2	0	0	0	0	0	0	0.000848896	0	0	0	0	0	0	0	0	0	0	0	0	0	0
6	0	0	0	0	0	0	0	0	0	0	0	0	0	0	0	0	0	0	0	0	0	0	0	0	0	0	0	1	0	0	0	0	0	0	0	0	0	0	0	0	0	0	0	0	0	0	0	0	0
24	0	0	0	0	0	0	0	0	0	0	0	0	0	0	1	0	0	0	0	0	0	0	0	0	0	0	0	1	0	0	0	0	0	0	0	0	0	0	0	0	0	0	0.00236407	0	0	0	0	0	0
25	0	0	0	0	0	0	0	1	2	0	0	0	0	0	0	0	0	0	0	0	0	0	0	0	0	0	0	9	0	0	0	0	0	0	0	0.000987167	0.00142959	0	0	0	0	0	0	0	0	0	0	0	0
32	0	0	0	0	0	0	0	0	4	0	0	0	0	0	0	0	0	0	0	0	0	0	0	0	0	0	0	5	0	0	0	0	0	0	0	0	0.00285919	0	0	0	0	0	0	0	0	0	0	0	0
48	9	0	41	0	0	0	6	1	8	0	0	0	0	2	9	0	1	0	0	0	0	0	0	0	0	0	0	156	0.011378	0	0.0570236	0	0	0	0.00509338	0.000987167	0.00571837	0	0	0	0	0.00343053	0.0212766	0	0.00584795	0	0	0	0
53	0	0	0	0	0	0	0	0	0	0	0	0	0	0	0	0	0	0	0	0	0	0	0	0	0	0	0	7	0	0	0	0	0	0	0	0	0	0	0	0	0	0	0	0	0	0	0	0	0
58	0	0	0	0	0	0	0	0	0	0	0	0	0	0	0	0	0	0	0	0	0	0	0	0	0	0	0	1	0	0	0	0	0	0	0	0	0	0	0	0	0	0	0	0	0	0	0	0	0
59	0	0	0	0	0	0	0	0	0	0	0	0	0	0	0	0	0	0	0	0	0	0	0	0	0	0	0	1	0	0	0	0	0	0	0	0	0	0	0	0	0	0	0	0	0	0	0	0	0
62	0	0	0	0	0	0	0	0	0	0	0	0	0	0	0	0	0	0	0	0	0	0	0	0	0	0	0	1	0	0	0	0	0	0	0	0	0	0	0	0	0	0	0	0	0	0	0	0	0
66	0	0	0	0	0	0	0	1	2	0	0	0	0	0	0	0	0	0	0	0	0	0	0	0	0	0	0	36	0	0	0	0	0	0	0	0.000987167	0.00142959	0	0	0	0	0	0	0	0	0	0	0	0
78	0	0	1	0	0	0	1	1	0	0	0	0	0	0	0	0	0	0	0	0	0	0	0	0	0	0	0	16	0	0	0.00139082	0	0	0	0.000848896	0.000987167	0	0	0	0	0	0	0	0	0	0	0	0	0
86	0	0	0	0	0	0	0	2	0	0	0	0	0	0	0	0	0	0	0	0	0	0	0	0	0	0	0	4	0	0	0	0	0	0	0	0.00197433	0	0	0	0	0	0	0	0	0	0	0	0	0
88	0	0	0	0	0	0	0	0	0	0	0	0	0	0	0	0	0	0	0	0	0	0	0	0	0	1	0	22	0	0	0	0	0	0	0	0	0	0	0	0	0	0	0	0	0	0	0	0	0
93	3	1	14	2	0	0	1	49	25	35	19	19	4	1	20	3	0	0	1	0	0	2	5	0	3	8	8	13	0.00379267	0.00282486	0.0194715	0.00829876	0	0	0.000848896	0.0483712	0.0178699	0.0632911	0.0607029	0.0298742	0.0143369	0.00171527	0.0472813	0.012	0	0	0.00152207	0	0
95	0	0	0	0	0	0	0	0	0	0	0	0	0	0	0	0	0	0	0	0	0	0	0	0	0	0	0	2	0	0	0	0	0	0	0	0	0	0	0	0	0	0	0	0	0	0	0	0	0
96	0	0	0	0	0	0	0	0	0	0	0	0	0	0	0	0	0	0	0	0	0	0	0	0	0	0	0	1	0	0	0	0	0	0	0	0	0	0	0	0	0	0	0	0	0	0	0	0	0
101	0	0	0	0	0	0	0	0	0	0	0	0	0	0	0	0	0	0	0	0	0	0	0	0	0	0	0	1	0	0	0	0	0	0	0	0	0	0	0	0	0	0	0	0	0	0	0	0	0
107	2	8	3	0	0	0	1	5	1	0	0	0	0	0	0	0	0	0	0	0	0	0	0	0	0	0	0	7	0.00252845	0.0225989	0.00417246	0	0	0	0.000848896	0.00493583	0.000714796	0	0	0	0	0	0	0	0	0	0	0	0
113	1	0	0	0	0	0	0	1	1	0	0	0	0	0	0	0	0	0	0	0	0	0	0	0	0	0	0	14	0.00126422	0	0	0	0	0	0	0.000987167	0.000714796	0	0	0	0	0	0	0	0	0	0	0	0
127	0	2	0	0	0	0	0	0	0	0	0	0	0	0	3	0	0	0	0	0	0	0	0	0	0	0	0	1	0	0.00564972	0	0	0	0	0	0	0	0	0	0	0	0	0.0070922	0	0	0	0	0	0
132	5	0	2	0	0	0	1	1	7	0	0	0	0	0	0	0	0	0	0	0	0	0	0	0	0	0	0	502	0.00632111	0	0.00278164	0	0	0	0.000848896	0.000987167	0.00500357	0	0	0	0	0	0	0	0	0	0	0	0
136	0	5	14	0	0	0	12	1	4	0	0	4	0	0	1	0	0	6	1	0	0	0	0	0	0	0	0	33	0	0.0141243	0.0194715	0	0	0	0.0101868	0.000987167	0.00285919	0	0	0.00628931	0	0	0.00236407	0	0	0.0666667	0.00152207	0	0
148	0	0	0	0	0	0	0	0	0	0	0	0	0	0	0	0	0	0	0	0	0	0	0	0	0	0	0	1	0	0	0	0	0	0	0	0	0	0	0	0	0	0	0	0	0	0	0	0	0
152	0	0	0	0	0	0	0	0	0	0	0	0	0	0	0	0	0	0	0	0	0	0	0	0	0	0	0	11	0	0	0	0	0	0	0	0	0	0	0	0	0	0	0	0	0	0	0	0	0
155	0	0	6	0	0	1	0	2	0	9	2	3	4	0	2	0	0	0	0	0	0	0	1	0	0	1	5	42	0	0	0.00834492	0	0	0.00847458	0	0.00197433	0	0.0162749	0.00638978	0.00471698	0.0143369	0	0.00472813	0	0	0	0	0	0
172	0	0	0	0	0	0	0	0	0	0	0	0	0	0	0	0	0	0	0	0	0	0	0	0	0	0	0	3	0	0	0	0	0	0	0	0	0	0	0	0	0	0	0	0	0	0	0	0	0
179	0	0	0	0	0	0	0	0	0	0	0	0	0	0	0	0	0	0	0	0	0	0	0	0	0	0	0	2	0	0	0	0	0	0	0	0	0	0	0	0	0	0	0	0	0	0	0	0	0
189	1	0	0	0	0	0	0	0	0	0	0	0	0	0	0	0	0	0	0	0	0	0	0	0	0	0	0	55	0.00126422	0	0	0	0	0	0	0	0	0	0	0	0	0	0	0	0	0	0	0	0
199	0	0	0	0	0	0	0	0	0	0	0	0	0	0	0	0	0	0	0	0	0	0	0	0	0	0	0	1	0	0	0	0	0	0	0	0	0	0	0	0	0	0	0	0	0	0	0	0	0
208	0	0	0	0	0	0	0	0	0	0	0	0	0	0	0	0	0	0	0	0	0	0	0	0	0	0	0	23	0	0	0	0	0	0	0	0	0	0	0	0	0	0	0	0	0	0	0	0	0
209	0	0	0	0	0	0	0	0	0	0	0	0	0	0	0	0	0	0	0	0	0	0	0	0	0	0	0	1	0	0	0	0	0	0	0	0	0	0	0	0	0	0	0	0	0	0	0	0	0
211	0	1	0	0	0	0	0	0	0	0	0	0	0	0	0	0	0	0	0	0	0	0	0	0	0	0	0	1	0	0.00282486	0	0	0	0	0	0	0	0	0	0	0	0	0	0	0	0	0	0	0
217	0	0	1	0	1	0	0	0	0	0	0	0	0	0	0	0	0	0	0	0	0	0	0	0	1	0	0	7	0	0	0.00139082	0	0.0113636	0	0	0	0	0	0	0	0	0	0	0	0	0	0	0	0
230	0	0	0	0	0	0	0	0	0	0	0	0	0	0	0	0	0	0	0	0	0	0	0	0	0	0	0	7	0	0	0	0	0	0	0	0	0	0	0	0	0	0	0	0	0	0	0	0	0
233	0	0	0	0	0	0	0	0	0	0	0	0	0	0	0	0	0	0	0	0	0	0	0	0	0	0	0	1	0	0	0	0	0	0	0	0	0	0	0	0	0	0	0	0	0	0	0	0	0
238	7	9	77	5	1	1	11	144	39	9	9	21	17	109	30	29	6	1	3	0	1	1	0	0	10	5	24	56	0.00884956	0.0254237	0.107093	0.0207469	0.0113636	0.00847458	0.00933786	0.142152	0.0278771	0.0162749	0.028754	0.0330189	0.0609319	0.186964	0.070922	0.116	0.0350877	0.0111111	0.00456621	0	0.0020202
239	0	0	0	0	0	0	0	0	0	0	0	0	0	0	0	0	0	0	0	0	0	0	0	0	0	0	0	30	0	0	0	0	0	0	0	0	0	0	0	0	0	0	0	0	0	0	0	0	0
243	0	0	0	0	0	0	0	0	0	0	0	0	0	0	0	0	0	0	0	0	0	0	0	0	0	0	0	3	0	0	0	0	0	0	0	0	0	0	0	0	0	0	0	0	0	0	0	0	0
251	0	0	0	0	0	0	0	0	0	0	0	0	0	0	0	0	0	0	0	0	0	0	0	0	0	0	0	3	0	0	0	0	0	0	0	0	0	0	0	0	0	0	0	0	0	0	0	0	0
264	1	0	3	2	0	0	38	128	61	5	3	1	3	0	7	0	0	0	2	3	0	0	0	0	1	2	5	758	0.00126422	0	0.00417246	0.00829876	0	0	0.0322581	0.126357	0.0436026	0.00904159	0.00958466	0.00157233	0.0107527	0	0.0165485	0	0	0	0.00304414	0.00488599	0
280	0	0	0	0	0	0	0	0	0	0	0	0	0	0	0	0	0	0	0	0	0	0	0	0	0	0	0	5	0	0	0	0	0	0	0	0	0	0	0	0	0	0	0	0	0	0	0	0	0
281	0	0	0	0	0	0	0	0	0	0	0	0	0	0	0	0	0	0	0	0	0	0	0	0	0	0	0	9	0	0	0	0	0	0	0	0	0	0	0	0	0	0	0	0	0	0	0	0	0
287	2	0	0	0	0	0	0	1	0	0	0	0	0	0	0	0	0	0	0	0	0	0	0	0	0	0	0	3	0.00252845	0	0	0	0	0	0	0.000987167	0	0	0	0	0	0	0	0	0	0	0	0	0
290	0	0	0	0	0	0	0	0	0	0	0	0	0	0	0	0	0	0	0	0	0	0	0	0	0	0	0	1	0	0	0	0	0	0	0	0	0	0	0	0	0	0	0	0	0	0	0	0	0
297	3	0	0	0	0	0	2	0	1	0	0	0	0	0	0	0	0	0	0	0	0	0	0	0	0	0	0	34	0.00379267	0	0	0	0	0	0.00169779	0	0.000714796	0	0	0	0	0	0	0	0	0	0	0	0
300	0	0	0	0	0	0	0	0	0	0	0	0	0	0	0	0	0	0	0	0	0	0	0	0	0	0	0	2	0	0	0	0	0	0	0	0	0	0	0	0	0	0	0	0	0	0	0	0	0
301	2	21	3	0	1	1	7	12	6	0	0	0	0	2	1	0	0	0	0	1	0	0	0	0	0	0	2	15	0.00252845	0.059322	0.00417246	0	0.0113636	0.00847458	0.00594228	0.011846	0.00428878	0	0	0	0	0.00343053	0.00236407	0	0	0	0	0.00162866	0
334	0	0	0	0	0	0	0	0	0	1	0	0	0	0	0	0	0	0	0	0	0	0	0	0	0	0	0	3	0	0	0	0	0	0	0	0	0	0.00180832	0	0	0	0	0	0	0	0	0	0	0
335	0	0	0	0	0	0	0	0	0	0	0	0	0	0	0	0	0	0	0	0	0	0	0	0	0	0	0	1	0	0	0	0	0	0	0	0	0	0	0	0	0	0	0	0	0	0	0	0	0
342	0	0	0	0	0	0	0	0	0	0	0	0	0	0	0	0	0	0	0	0	0	0	0	0	0	0	0	3	0	0	0	0	0	0	0	0	0	0	0	0	0	0	0	0	0	0	0	0	0
348	0	0	0	0	0	0	0	0	0	0	0	0	0	0	0	0	0	0	0	0	0	0	0	0	0	0	1	14	0	0	0	0	0	0	0	0	0	0	0	0	0	0	0	0	0	0	0	0	0
350	167	50	70	88	8	28	73	218	74	240	176	384	4	5	127	70	58	19	125	30	54	18	44	144	24	15	269	42	0.211125	0.141243	0.0973574	0.365145	0.0909091	0.237288	0.0619694	0.215202	0.0528949	0.433996	0.5623	0.603774	0.0143369	0.00857633	0.300236	0.28	0.339181	0.211111	0.190259	0.0488599	0.109091
361	0	0	0	0	0	0	1	6	0	0	0	0	0	0	0	0	0	0	0	0	0	0	0	0	0	0	0	12	0	0	0	0	0	0	0.000848896	0.005923	0	0	0	0	0	0	0	0	0	0	0	0	0
372	1	0	0	1	0	0	0	0	0	0	0	0	0	0	1	1	0	0	0	0	0	0	0	0	0	0	1	71	0.00126422	0	0	0.00414938	0	0	0	0	0	0	0	0	0	0	0.00236407	0.004	0	0	0	0	0
384	0	0	1	0	0	0	0	0	0	0	0	0	0	0	0	0	0	0	0	0	0	0	0	0	0	0	0	1	0	0	0.00139082	0	0	0	0	0	0	0	0	0	0	0	0	0	0	0	0	0	0
387	0	0	0	0	0	0	0	0	0	0	0	0	0	0	0	0	0	0	0	0	0	0	0	0	0	0	0	2	0	0	0	0	0	0	0	0	0	0	0	0	0	0	0	0	0	0	0	0	0
388	1	1	0	4	4	0	0	0	4	0	1	2	0	0	2	2	0	0	0	9	5	4	5	1	3	12	11	5	0.00126422	0.00282486	0	0.0165975	0.0454545	0	0	0	0.00285919	0	0.00319489	0.00314465	0	0	0.00472813	0.008	0	0	0	0.014658	0.010101
397	0	1	0	0	4	0	0	0	2	0	0	23	1	0	1	0	0	0	0	78	15	0	0	0	0	0	0	5	0	0.00282486	0	0	0.0454545	0	0	0	0.00142959	0	0	0.0361635	0.00358423	0	0.00236407	0	0	0	0	0.127036	0.030303
401	8	0	0	0	0	0	0	0	0	0	0	0	0	0	0	0	0	0	0	0	0	0	0	0	1	3	0	0	0.0101138	0	0	0	0	0	0	0	0	0	0	0	0	0	0	0	0	0	0	0	0
405	0	0	0	0	0	0	0	0	0	3	1	0	0	0	0	0	0	0	0	0	0	0	0	0	0	0	4	2	0	0	0	0	0	0	0	0	0	0.00542495	0.00319489	0	0	0	0	0	0	0	0	0	0
439	1	1	6	15	0	2	147	78	22	34	4	21	3	0	2	7	1	0	14	167	0	7	11	7	12	7	21	133	0.00126422	0.00282486	0.00834492	0.0622407	0	0.0169492	0.124788	0.076999	0.0157255	0.0614828	0.0127796	0.0330189	0.0107527	0	0.00472813	0.028	0.00584795	0	0.021309	0.271987	0
442	0	1	0	0	0	0	0	0	0	4	0	0	0	0	0	0	0	0	0	0	0	0	0	0	0	0	2	22	0	0.00282486	0	0	0	0	0	0	0	0.00723327	0	0	0	0	0	0	0	0	0	0	0
448	0	0	0	0	0	0	0	0	0	0	0	0	0	0	0	0	0	0	0	0	0	0	0	0	0	0	0	1	0	0	0	0	0	0	0	0	0	0	0	0	0	0	0	0	0	0	0	0	0
450	0	0	0	0	0	0	0	0	0	0	0	0	0	0	0	0	0	0	0	0	0	0	0	0	0	0	0	3	0	0	0	0	0	0	0	0	0	0	0	0	0	0	0	0	0	0	0	0	0
455	0	0	0	0	0	0	0	0	0	0	0	0	0	0	0	0	0	0	0	0	0	0	0	0	0	0	0	12	0	0	0	0	0	0	0	0	0	0	0	0	0	0	0	0	0	0	0	0	0
468	0	0	0	0	0	0	0	0	0	0	0	0	0	0	0	0	0	0	0	0	0	0	0	0	0	0	0	1	0	0	0	0	0	0	0	0	0	0	0	0	0	0	0	0	0	0	0	0	0
473	147	71	56	48	33	43	25	1	88	57	15	53	12	75	10	27	42	16	12	0	73	0	10	5	42	23	74	95	0.185841	0.200565	0.077886	0.19917	0.375	0.364407	0.0212224	0.000987167	0.0629021	0.103074	0.0479233	0.0833333	0.0430108	0.128645	0.0236407	0.108	0.245614	0.177778	0.0182648	0	0.147475
475	0	0	2	0	0	0	0	0	0	0	0	0	0	0	0	0	0	0	0	0	0	0	0	0	0	0	0	3	0	0	0.00278164	0	0	0	0	0	0	0	0	0	0	0	0	0	0	0	0	0	0
477	0	0	0	0	0	0	0	0	0	1	0	0	0	0	0	0	0	0	0	0	0	0	0	0	0	0	0	0	0	0	0	0	0	0	0	0	0	0.00180832	0	0	0	0	0	0	0	0	0	0	0
478	1	1	4	0	0	0	0	0	1	0	0	0	1	5	0	1	0	0	0	0	0	0	0	0	0	1	3	43	0.00126422	0.00282486	0.00556328	0	0	0	0	0	0.000714796	0	0	0	0.00358423	0.00857633	0	0.004	0	0	0	0	0
489	0	0	0	0	0	0	0	0	0	0	0	0	0	0	0	0	0	0	0	0	0	0	0	0	0	0	0	20	0	0	0	0	0	0	0	0	0	0	0	0	0	0	0	0	0	0	0	0	0
494	0	0	0	0	0	0	0	0	0	0	0	0	0	0	0	0	0	0	0	0	0	0	0	0	0	0	0	2	0	0	0	0	0	0	0	0	0	0	0	0	0	0	0	0	0	0	0	0	0
500	1	0	0	1	0	0	0	0	0	0	0	2	0	0	1	0	0	0	0	0	0	0	0	0	0	0	2	11	0.00126422	0	0	0.00414938	0	0	0	0	0	0	0	0.00314465	0	0	0.00236407	0	0	0	0	0	0
501	0	0	0	0	0	0	0	0	0	0	0	0	0	0	0	0	0	0	0	0	0	0	0	0	0	0	0	2	0	0	0	0	0	0	0	0	0	0	0	0	0	0	0	0	0	0	0	0	0
511	1	0	1	0	0	0	28	0	0	0	0	0	0	0	0	1	0	0	0	0	0	0	2	0	1	0	3	72	0.00126422	0	0.00139082	0	0	0	0.0237691	0	0	0	0	0	0	0	0	0.004	0	0	0	0	0
523	19	0	22	9	1	1	97	1	18	5	4	0	11	35	5	2	18	0	94	3	27	0	0	0	0	0	5	100	0.0240202	0	0.0305981	0.0373444	0.0113636	0.00847458	0.082343	0.000987167	0.0128663	0.00904159	0.0127796	0	0.0394265	0.0600343	0.0118203	0.008	0.105263	0	0.143075	0.00488599	0.0545455
524	0	0	0	0	0	0	0	0	3	0	1	0	0	0	0	0	0	0	0	0	0	0	0	0	0	0	0	24	0	0	0	0	0	0	0	0	0.00214439	0	0.00319489	0	0	0	0	0	0	0	0	0	0
527	0	1	1	0	0	0	0	0	0	0	0	0	0	0	0	2	0	0	0	0	0	0	0	0	0	0	5	12	0	0.00282486	0.00139082	0	0	0	0	0	0	0	0	0	0	0	0	0.008	0	0	0	0	0
534	0	0	1	0	0	0	0	0	0	0	0	0	0	0	0	0	0	0	0	0	0	0	0	0	0	0	0	1	0	0	0.00139082	0	0	0	0	0	0	0	0	0	0	0	0	0	0	0	0	0	0
537	19	3	5	17	8	6	0	4	39	14	12	1	4	5	13	5	7	7	5	0	3	4	10	8	1	0	0	8	0.0240202	0.00847458	0.0069541	0.0705394	0.0909091	0.0508475	0	0.00394867	0.0278771	0.0253165	0.0383387	0.00157233	0.0143369	0.00857633	0.0307329	0.02	0.0409357	0.0777778	0.00761035	0	0.00606061
563	0	0	0	0	0	0	0	0	0	0	0	0	0	0	0	0	0	0	0	0	0	0	0	0	0	0	0	1	0	0	0	0	0	0	0	0	0	0	0	0	0	0	0	0	0	0	0	0	0
565	0	0	0	0	0	0	0	0	0	0	0	0	0	0	0	0	0	0	0	0	0	0	0	0	0	0	0	2	0	0	0	0	0	0	0	0	0	0	0	0	0	0	0	0	0	0	0	0	0
568	0	0	3	0	0	0	0	0	0	0	0	0	0	0	0	0	0	0	0	0	0	0	0	0	1	0	0	12	0	0	0.00417246	0	0	0	0	0	0	0	0	0	0	0	0	0	0	0	0	0	0
574	0	0	0	0	0	0	0	0	0	0	0	0	0	0	0	0	0	0	0	0	0	0	0	0	0	0	0	1	0	0	0	0	0	0	0	0	0	0	0	0	0	0	0	0	0	0	0	0	0
578	0	0	0	0	0	0	0	0	0	0	0	0	0	0	0	0	0	0	0	0	0	0	0	0	0	0	0	7	0	0	0	0	0	0	0	0	0	0	0	0	0	0	0	0	0	0	0	0	0
580	0	0	0	0	0	0	0	0	0	0	0	0	0	0	0	0	0	0	0	0	0	0	0	0	0	0	0	1	0	0	0	0	0	0	0	0	0	0	0	0	0	0	0	0	0	0	0	0	0
582	0	0	0	0	0	0	0	0	0	0	0	0	0	0	0	0	0	0	0	0	0	0	0	0	0	0	0	1	0	0	0	0	0	0	0	0	0	0	0	0	0	0	0	0	0	0	0	0	0
584	11	2	0	13	4	3	38	13	42	9	4	2	18	2	0	1	0	0	11	0	6	0	1	0	3	1	5	34	0.0139064	0.00564972	0	0.0539419	0.0454545	0.0254237	0.0322581	0.0128332	0.0300214	0.0162749	0.0127796	0.00314465	0.0645161	0.00343053	0	0.004	0	0	0.0167428	0	0.0121212
590	0	0	0	0	0	0	0	0	0	0	0	0	0	0	0	0	0	0	0	0	0	0	0	0	0	0	0	1	0	0	0	0	0	0	0	0	0	0	0	0	0	0	0	0	0	0	0	0	0
591	3	0	0	0	0	0	0	0	1	14	0	3	0	0	0	11	0	0	0	4	0	0	3	0	0	0	4	16	0.00379267	0	0	0	0	0	0	0	0.000714796	0.0253165	0	0.00471698	0	0	0	0.044	0	0	0	0.00651466	0
597	0	0	0	0	0	0	0	0	0	0	0	0	0	0	0	0	0	0	0	0	0	0	0	0	0	0	0	1	0	0	0	0	0	0	0	0	0	0	0	0	0	0	0	0	0	0	0	0	0
606	62	1	16	14	5	1	0	6	15	31	7	11	7	0	6	8	6	1	3	0	6	0	0	0	13	6	23	61	0.0783818	0.00282486	0.0222531	0.0580913	0.0568182	0.00847458	0	0.005923	0.0107219	0.0560579	0.0223642	0.0172956	0.0250896	0	0.0141844	0.032	0.0350877	0.0111111	0.00456621	0	0.0121212
617	0	0	0	0	0	0	0	0	0	0	0	0	0	0	0	0	0	0	0	0	0	0	0	0	0	0	0	5	0	0	0	0	0	0	0	0	0	0	0	0	0	0	0	0	0	0	0	0	0
619	0	0	0	0	0	0	0	0	0	0	0	0	0	0	0	0	0	0	0	0	0	0	0	0	0	0	0	2	0	0	0	0	0	0	0	0	0	0	0	0	0	0	0	0	0	0	0	0	0
622	7	5	6	4	2	0	10	11	8	12	2	1	4	8	6	0	4	0	25	0	1	0	1	1	4	0	2	157	0.00884956	0.0141243	0.00834492	0.0165975	0.0227273	0	0.00848896	0.0108588	0.00571837	0.0216998	0.00638978	0.00157233	0.0143369	0.0137221	0.0141844	0	0.0233918	0	0.0380518	0	0.0020202
629	0	0	1	0	0	0	0	0	0	0	0	0	0	2	0	0	0	0	0	0	0	0	0	0	0	0	0	9	0	0	0.00139082	0	0	0	0	0	0	0	0	0	0	0.00343053	0	0	0	0	0	0	0
634	0	0	0	0	0	0	0	0	0	0	0	0	0	0	0	0	0	0	0	0	0	0	0	0	0	0	0	1	0	0	0	0	0	0	0	0	0	0	0	0	0	0	0	0	0	0	0	0	0
635	0	0	0	0	0	0	0	0	0	0	0	0	0	0	0	0	0	0	0	0	0	0	0	0	0	0	0	4	0	0	0	0	0	0	0	0	0	0	0	0	0	0	0	0	0	0	0	0	0
642	0	0	0	0	0	0	0	0	0	0	0	0	0	0	0	0	0	0	0	0	0	0	0	0	0	0	0	24	0	0	0	0	0	0	0	0	0	0	0	0	0	0	0	0	0	0	0	0	0
647	0	0	0	0	0	0	0	0	0	0	0	0	1	0	0	0	0	0	0	0	0	0	0	0	0	0	0	2	0	0	0	0	0	0	0	0	0	0	0	0	0.00358423	0	0	0	0	0	0	0	0
652	0	0	0	0	0	0	0	0	0	0	0	0	0	0	0	0	0	0	0	0	0	0	0	0	0	0	0	2	0	0	0	0	0	0	0	0	0	0	0	0	0	0	0	0	0	0	0	0	0
654	0	0	0	0	0	0	0	0	0	0	0	0	0	0	0	0	0	0	0	0	0	0	0	0	0	0	0	1	0	0	0	0	0	0	0	0	0	0	0	0	0	0	0	0	0	0	0	0	0
658	1	0	0	0	0	0	0	0	2	0	0	0	0	0	0	0	0	0	0	0	0	0	0	0	0	0	0	27	0.00126422	0	0	0	0	0	0	0	0.00142959	0	0	0	0	0	0	0	0	0	0	0	0
660	0	0	0	0	0	0	9	0	0	0	0	0	0	0	0	0	0	0	0	0	0	0	0	0	0	0	0	8	0	0	0	0	0	0	0.00764007	0	0	0	0	0	0	0	0	0	0	0	0	0	0
662	29	3	29	1	0	0	20	28	65	0	0	1	1	2	0	0	3	4	3	0	5	0	4	0	7	7	28	263	0.0366625	0.00847458	0.0403338	0.00414938	0	0	0.0169779	0.0276407	0.0464618	0	0	0.00157233	0.00358423	0.00343053	0	0	0.0175439	0.0444444	0.00456621	0	0.010101
675	14	0	0	0	0	0	1	0	0	0	0	0	0	1	0	0	0	0	0	0	0	0	0	0	1	3	1	184	0.0176991	0	0	0	0	0	0.000848896	0	0	0	0	0	0	0.00171527	0	0	0	0	0	0	0
679	19	58	208	6	5	8	161	210	638	48	34	23	24	20	107	20	3	7	125	300	267	33	78	39	2	9	24	71	0.0240202	0.163842	0.289291	0.0248963	0.0568182	0.0677966	0.136672	0.207305	0.45604	0.0867993	0.108626	0.0361635	0.0860215	0.0343053	0.252955	0.08	0.0175439	0.0777778	0.190259	0.488599	0.539394
683	0	0	0	0	1	0	3	0	7	1	1	6	33	0	5	0	0	0	0	0	0	0	0	5	0	0	0	10	0	0	0	0	0.0113636	0	0.00254669	0	0.00500357	0.00180832	0.00319489	0.00943396	0.11828	0	0.0118203	0	0	0	0	0	0
684	239	108	73	11	10	23	481	80	174	21	17	48	121	301	53	19	22	29	225	17	28	1	21	42	15	20	19	62	0.302149	0.305085	0.10153	0.0456432	0.113636	0.194915	0.408319	0.0789733	0.124375	0.0379747	0.0543131	0.0754717	0.433692	0.516295	0.125296	0.076	0.128655	0.322222	0.342466	0.0276873	0.0565657
687	0	0	0	0	0	0	0	1	0	0	0	0	0	0	0	0	0	0	0	0	0	0	0	0	1	0	1	38	0	0	0	0	0	0	0	0.000987167	0	0	0	0	0	0	0	0	0	0	0	0	0
689	0	0	0	0	0	0	0	0	0	0	0	0	0	0	0	0	0	0	0	0	0	0	0	0	0	0	0	5	0	0	0	0	0	0	0	0	0	0	0	0	0	0	0	0	0	0	0	0	0
692	0	0	0	0	0	0	0	0	0	0	0	0	0	0	0	0	0	0	0	0	0	0	0	0	0	0	0	2	0	0	0	0	0	0	0	0	0	0	0	0	0	0	0	0	0	0	0	0	0
695	0	0	49	0	0	0	0	0	0	0	0	7	0	8	8	41	0	0	2	0	3	0	0	0	2	0	2	14	0	0	0.0681502	0	0	0	0	0	0	0	0	0.0110063	0	0.0137221	0.0189125	0.164	0	0	0.00304414	0	0.00606061
698	0	0	0	0	0	0	0	0	0	0	0	0	0	0	0	0	0	0	0	0	0	0	0	0	0	0	0	1	0	0	0	0	0	0	0	0	0	0	0	0	0	0	0	0	0	0	0	0	0
705	0	0	0	0	0	0	0	0	0	0	0	0	0	0	0	0	0	0	0	0	0	0	0	0	0	0	0	2	0	0	0	0	0	0	0	0	0	0	0	0	0	0	0	0	0	0	0	0	0
706	0	0	0	0	0	0	0	0	0	0	0	0	0	0	0	0	0	0	0	0	0	0	0	0	0	0	0	2	0	0	0	0	0	0	0	0	0	0	0	0	0	0	0	0	0	0	0	0	0
709	0	0	0	0	0	0	0	0	4	0	0	0	0	0	0	0	0	0	0	0	0	0	0	0	0	0	0	20	0	0	0	0	0	0	0	0	0.00285919	0	0	0	0	0	0	0	0	0	0	0	0
726	0	0	0	0	0	0	0	0	0	0	0	0	0	0	0	0	0	0	0	0	0	0	0	0	0	0	0	1	0	0	0	0	0	0	0	0	0	0	0	0	0	0	0	0	0	0	0	0	0
733	0	0	0	0	0	0	0	0	0	0	0	0	0	0	0	0	0	0	0	0	0	0	0	0	0	0	0	1	0	0	0	0	0	0	0	0	0	0	0	0	0	0	0	0	0	0	0	0	0
738	0	0	0	0	0	0	0	0	0	0	0	0	0	0	0	0	0	0	0	0	0	0	0	0	0	0	0	41	0	0	0	0	0	0	0	0	0	0	0	0	0	0	0	0	0	0	0	0	0
747	0	0	0	0	0	0	0	0	0	0	0	0	0	0	0	0	0	0	0	0	0	0	0	0	0	0	0	10	0	0	0	0	0	0	0	0	0	0	0	0	0	0	0	0	0	0	0	0	0
749	0	0	0	0	0	0	0	0	0	0	1	0	0	0	0	0	0	0	0	0	0	0	0	0	0	0	0	14	0	0	0	0	0	0	0	0	0	0	0.00319489	0	0	0	0	0	0	0	0	0	0
761	1	0	0	0	0	0	0	0	0	0	0	0	0	0	0	0	0	0	0	0	0	0	0	0	0	0	0	82	0.00126422	0	0	0	0	0	0	0	0	0	0	0	0	0	0	0	0	0	0	0	0
766	0	0	0	0	0	0	0	0	0	0	0	0	0	0	0	0	0	0	0	0	0	0	0	0	0	0	0	8	0	0	0	0	0	0	0	0	0	0	0	0	0	0	0	0	0	0	0	0	0
767	0	0	0	0	0	0	0	0	0	0	0	0	0	0	0	0	0	0	0	0	0	0	0	0	0	0	0	7	0	0	0	0	0	0	0	0	0	0	0	0	0	0	0	0	0	0	0	0	0
771	0	0	0	0	0	0	0	0	0	0	0	0	0	0	0	0	0	0	0	0	0	0	0	0	0	0	0	9	0	0	0	0	0	0	0	0	0	0	0	0	0	0	0	0	0	0	0	0	0
786	0	0	0	0	0	0	0	0	0	0	0	0	0	0	0	0	0	0	0	0	0	0	0	0	0	0	0	48	0	0	0	0	0	0	0	0	0	0	0	0	0	0	0	0	0	0	0	0	0
790	0	0	0	0	0	0	0	1	0	0	0	0	0	0	0	0	0	0	0	0	0	0	0	0	0	0	0	1	0	0	0	0	0	0	0	0.000987167	0	0	0	0	0	0	0	0	0	0	0	0	0
802	0	0	0	0	0	0	0	0	0	0	0	0	0	0	0	0	0	0	0	0	0	0	0	0	0	0	0	6	0	0	0	0	0	0	0	0	0	0	0	0	0	0	0	0	0	0	0	0	0
807	0	0	0	0	0	0	0	0	0	0	0	0	0	0	0	0	0	0	0	0	0	0	0	0	0	0	0	3	0	0	0	0	0	0	0	0	0	0	0	0	0	0	0	0	0	0	0	0	0
[truncated: 7 more columns]
