# Supplementary material for: Clonal transcriptomics identifies mechanisms of chemoresistance and empowers rational design of combination therapies
Source: bioRxiv preprint, doi:10.1101/2021.12.09.471927, version 2 (2022-06-10)
Supplement: Supplementary Table 5 [file 471927_file06.xlsx]

## Sheet: Clone238_FindMarkers_by_expt
gene	logFC.Veh.ExptC	adj.p.Veh.ExptC	logFC.Veh.ExptD	adj.p.Veh.ExptD	logFC.Veh.ExptA	adj.p.Veh.ExptD	fisher.combined.pvalue	mean.logFC
0610009B22Rik	-0.0298529	1	-0.0499924	1	-0.0078124	1	1	-0.0292192
0610009O20Rik	-0.00447265	1	-0.0206598	1	-0.00268999	1	1	-0.00927415
0610010F05Rik	0.0296954	1	-0.0319465	1	0.0365863	1	1	0.0114451
0610010K14Rik	-0.0477967	1	-0.0205686	1	-0.0600192	1	1	-0.0427949
0610012G03Rik	0.0455017	1	-0.0444778	1	-0.0809021	1	1	-0.0266261
0610030E20Rik	0.0575231	1	-0.00536805	1	0.0761172	1	1	0.0427574
0610037L13Rik	0.0224735	1	-0.00820731	1	-0.0743017	1	1	-0.0200119
1110002L01Rik	-0.0187627	1	0.00652693	1	0.000333796	1	1	-0.00396733
1110004E09Rik	0.0444593	1	-0.0640095	1	0.0210257	1	1	0.000491857
1110004F10Rik	0.00544615	1	-0.14307	1	0.0286325	1	1	-0.0363305
1110008F13Rik	0.0264737	1	-0.0411548	1	-0.0024901	1	1	-0.00572374
1110008L16Rik	-0.00138833	1	-0.0276096	1	-0.016436	1	1	-0.0151447
1110008P14Rik	-0.227648	1	-0.116861	1	-0.520474	0.0559678	0.449912	-0.288328
1110012L19Rik	-0.0159849	1	0.0513598	1	-0.0323942	1	1	0.000993587
1110019D14Rik	-0.00751678	1	-0.0188746	1	-0.00852494	1	1	-0.0116388
1110032A03Rik	0.00591086	1	-0.0139659	1	-0.0354764	1	1	-0.0145105
1110034G24Rik	-0.00223965	1	-0.0124619	1	-0.00399175	1	1	-0.00623111
1110038F14Rik	-0.0560548	1	-0.213325	1	-0.0995529	1	1	-0.122978
1110046J04Rik	0.000905285	1	-0.0374382	1	-0.0281101	1	1	-0.0215476
1110059E24Rik	-0.0374865	1	-0.203701	1	-0.0699894	1	1	-0.103725
1110059G10Rik	-0.0387616	1	-0.125317	1	-0.0321873	1	1	-0.0654221
1110065P20Rik	-0.0564016	1	-0.062626	1	-0.0174888	1	1	-0.0455055
1190002N15Rik	-0.00971208	1	-0.00332459	1	-0.0258213	1	1	-0.0129526
1190005I06Rik	-0.0250227	1	0.00791234	1	0.0075446	1	1	-0.00318859
1190007I07Rik	-0.0360571	1	0.0732909	1	-0.1087	1	1	-0.023822
1300002E11Rik	-0.0201641	1	-0.0237771	1	0.020064	1	1	-0.00795907
1500011B03Rik	-0.00959455	1	-0.062814	1	-0.0350502	1	1	-0.0358196
1500011K16Rik	0.0522924	1	0.352294	1	-0.00160364	1	1	0.134328
1500015A07Rik	0.0127799	1	-0.0268594	1	-0.0336384	1	1	-0.015906
1600002K03Rik	0.00564577	1	-0.0395232	1	-0.028894	1	1	-0.0209238
1600012H06Rik	-0.0104366	1	-0.0135373	1	-0.0149278	1	1	-0.0129672
1600014C10Rik	0.000718394	1	-0.00400218	1	-0.0107876	1	1	-0.00469046
1600020E01Rik	0.00720807	1	-0.067892	1	0.0121912	1	1	-0.0161643
1700006J14Rik	-0.0199688	1	-0.0237471	1	0.00670042	1	1	-0.0123385
1700008J07Rik	0.00266226	1	-0.0207614	1	-0.0160371	1	1	-0.0113787
1700017B05Rik	-0.0121506	1	-0.0864682	1	-0.0193662	1	1	-0.0393283
1700019L13Rik	0.011532	1	-0.00183229	1	-0.0123706	1	1	-0.000890317
1700020I14Rik	0.0193944	1	-0.00959401	1	-0.0222777	1	1	-0.00415913
1700021F05Rik	-0.00576233	1	-0.0547193	1	-0.0320288	1	1	-0.0308368
1700025G04Rik	-0.0337117	1	0.00164252	1	-0.0211273	1	1	-0.0177322
1700030K09Rik	0.00368006	1	-0.0239587	1	0.00927517	1	1	-0.00366782
1700037C18Rik	-0.00427057	1	-0.0267598	1	-0.00652521	1	1	-0.0125185
1700037H04Rik	-0.0153781	1	-0.0703424	1	-0.0353109	1	1	-0.0403438
1700052K11Rik	0.00187991	1	-0.0176717	1	0.0643232	1	1	0.0161771
1700056E22Rik	0.0111162	1	0.0108037	1	0.00292902	1	1	0.00828299
1700086O06Rik	0.0181632	1	-0.0610504	1	-0.0170213	1	1	-0.0199695
1700088E04Rik	0.0315709	1	-0.0708869	1	-0.0126737	1	1	-0.0173299
1700109H08Rik	-0.00964021	1	0.0292383	1	0.00882521	1	1	0.00947442
1700113A16Rik	-0.0229455	1	-0.01309	1	-0.0141448	1	1	-0.0167268
1700123O20Rik	-0.0155064	1	0.0260054	1	-0.0218769	1	1	-0.00379263
1810009A15Rik	-0.0218008	1	0.0110656	1	-0.039946	1	1	-0.0168937
1810013L24Rik	-0.0159921	1	-0.0344678	1	-0.0322197	1	1	-0.0275599
1810022K09Rik	0.0257113	1	-0.0505754	1	0.0656067	1	1	0.0135809
1810030O07Rik	-0.0201738	1	-0.0261211	1	-0.0238319	1	1	-0.0233756
1810032O08Rik	-0.0115291	1	-0.0943448	1	0.037102	1	1	-0.022924
1810037I17Rik	0.0191797	1	-0.231294	1	0.0110393	1	1	-0.0670249
1810043G02Rik	0.0178818	1	-0.158135	1	-0.0200573	1	1	-0.0534369
1810044D09Rik	0.00397651	1	-0.0111205	1	-0.0117433	1	1	-0.00629578
1810055G02Rik	-0.030996	1	-0.121672	1	-0.0875074	1	1	-0.0800586
1810058I24Rik	-0.0193618	1	-0.115349	1	-0.0251051	1	1	-0.053272
1810062G17Rik	0.0153385	1	0.0306779	1	0.00452565	1	1	0.0168473
2010107E04Rik	-0.0303113	1	0.130095	1	0.0330993	1	1	0.0442944
2010111I01Rik	0.0127353	1	0.0762211	1	0.0154273	1	1	0.0347946
2010300F17Rik	0.0697994	1	-0.0133071	1	0.0446246	1	1	0.0337056
2010315B03Rik	0.000298835	1	0.016611	1	-0.00513738	1	1	0.00392416
2010320M18Rik	0.0242285	1	-0.0312018	1	0.103112	1	1	0.0320462
2200002D01Rik	0.0910401	1	0.532807	1	0.0472817	1	1	0.223709
2210016F16Rik	0.0048866	1	-0.0248002	1	0.00210665	1	1	-0.00593566
2210016L21Rik	0.0213039	1	-0.0405744	1	-0.0580221	1	1	-0.0257642
2210408I21Rik	0.00358788	1	0.00456781	1	0.00600539	1	1	0.00472036
2300009A05Rik	-0.0362917	1	-0.0180734	1	-0.095855	1	1	-0.0500734
2310001H17Rik	0.00306763	1	0.0049565	1	0.0196054	1	1	0.00920984
2310009B15Rik	0.139472	1	0.157812	1	0.0446687	1	1	0.113984
2310011J03Rik	-0.0023418	1	-0.133846	1	-0.0416459	1	1	-0.0592779
2310022A10Rik	-0.00291461	1	-0.0139757	1	-0.021891	1	1	-0.0129271
2310022B05Rik	-0.0440488	1	-0.00297566	1	0.022244	1	1	-0.00826015
2310030G06Rik	0.0780334	1	-0.0484366	1	0.0313825	1	1	0.0203264
2310033P09Rik	-0.044336	1	-0.0945059	1	-0.0610523	1	1	-0.0666314
2310035C23Rik	-0.00652273	1	0.0161535	1	0.0827593	1	1	0.0307967
2310039H08Rik	0.00464849	1	-0.00489076	1	-0.0422334	1	1	-0.0141586
2310057M21Rik	-0.00795441	1	0.00773176	1	-0.00724894	1	1	-0.00249053
2310061I04Rik	-0.0381603	1	-0.0496814	1	-0.0346669	1	1	-0.0408362
2410002F23Rik	-0.0400293	1	-0.115971	1	-0.0312983	1	1	-0.062433
2410004B18Rik	2.65007e-05	1	-0.0284794	1	-0.0400265	1	1	-0.0228265
2410015M20Rik	0.0402479	1	0.175622	1	0.0493688	1	1	0.0884128
2410089E03Rik	-0.0278122	1	-0.0722731	1	-0.0449921	1	1	-0.0483591
2410131K14Rik	-0.0255286	1	-0.0368279	1	-0.0418846	1	1	-0.0347471
2510002D24Rik	0.04851	1	0.124338	1	0.0428465	1	1	0.0718981
2510017J16Rik	-0.0217299	1	-0.0163874	1	0.0186628	1	1	-0.00648483
2510039O18Rik	0.0011016	1	-0.0662008	1	0.0122813	1	1	-0.017606
2510046G10Rik	0.0264007	1	-0.0159506	1	-0.00297952	1	1	0.00249018
2610001J05Rik	0.0284872	1	0.03427	1	-0.0480006	1	1	0.00491886
2610002M06Rik	-0.00524976	1	-0.00969416	1	-0.043756	1	1	-0.0195666
2610008E11Rik	0.000145973	1	-0.0468414	1	-0.0217439	1	1	-0.0228131
2610020C07Rik	-0.00129147	1	-0.021071	1	-0.0052829	1	1	-0.00921511
2610021A01Rik	-0.012076	1	-0.0230386	1	-0.00990053	1	1	-0.015005
2610037D02Rik	0.00820437	1	-0.0131647	1	0.0655225	1	1	0.0201874
2610044O15Rik8	-0.00710668	1	-0.0300604	1	0.0926001	1	1	0.0184777
2610301B20Rik	-0.0155627	1	-0.0574133	1	-0.00788764	1	1	-0.0269546
2610507B11Rik	0.00571734	1	0.0730794	1	0.0602085	1	1	0.0463351
2700016F22Rik	0.000601851	1	-0.0659406	1	0.0107415	1	1	-0.0181991
2700038G22Rik	-0.000780018	1	-0.00724796	1	-0.0400041	1	1	-0.0160107
2700049A03Rik	0.00791393	1	-0.0296847	1	-0.0289372	1	1	-0.0169026
2700062C07Rik	-0.00209197	1	0.00256519	1	0.000195447	1	1	0.000222887
2700081O15Rik	-0.033995	1	-0.15633	1	-0.0765392	1	1	-0.0889549
2700097O09Rik	-0.0252434	1	-0.0508635	1	-0.0200893	1	1	-0.0320654
2810001G20Rik	-0.0131133	1	0.00257015	1	0.000473065	1	1	-0.0033567
2810004N23Rik	0.0862884	1	0.0414018	1	-0.0318707	1	1	0.0319398
2810006K23Rik	-0.00434965	1	-0.0195531	1	-0.0174007	1	1	-0.0137678
2810402E24Rik	0.0246498	1	-0.0558556	1	-0.00396648	1	1	-0.0117241
2810403A07Rik	-0.0441998	1	-0.0659286	1	0.0250048	1	1	-0.0283745
2810408A11Rik	0.013873	1	-0.0384308	1	0.00661021	1	1	-0.00598254
2810454H06Rik	0.0135537	1	-0.0416211	1	0.00901349	1	1	-0.00635129
2810457G06Rik	-0.0121602	1	-0.0325756	1	-0.0173252	1	1	-0.020687
2810474O19Rik	-0.116365	1	-0.135091	1	-0.102315	1	1	-0.117924
2900009J06Rik	-0.0573066	1	-0.122276	1	0.0073149	1	1	-0.0574225
2900026A02Rik	-0.113448	1	-0.126092	1	-0.0540169	1	1	-0.0978523
2900060B14Rik	-0.0175568	1	-0.0440262	1	0.00822603	1	1	-0.0177857
2900076A07Rik	0.00517954	1	-0.00411608	1	-0.0178124	1	1	-0.00558299
2900093K20Rik	0.0298425	1	-0.000684452	1	-0.0115985	1	1	0.0058532
2900097C17Rik	-0.0688911	1	-0.0742982	1	0.0146769	1	1	-0.0428374
3010003L21Rik	-0.0122717	1	0.00184146	1	0.000534168	1	1	-0.00329869
3110002H16Rik	0.0222048	1	-0.061758	1	-0.00339276	1	1	-0.0143153
3110009E18Rik	-0.0261181	1	-0.004301	1	0.0236669	1	1	-0.00225072
3110040N11Rik	0.0841059	1	-0.0967083	1	0.010757	1	1	-0.000615124
3110043O21Rik	-0.0302267	1	-0.0994063	1	0.00259699	1	1	-0.0423453
3110062M04Rik	-0.0215663	1	0.0047099	1	-0.0109386	1	1	-0.00926501
3110082I17Rik	-0.0476218	1	-0.0442564	1	-0.0218694	1	1	-0.0379159
3300005D01Rik	-0.0648259	1	-0.170434	1	-0.129912	1	1	-0.121724
3830406C13Rik	-0.0259029	1	-0.013533	1	-0.00154334	1	1	-0.0136597
4632415L05Rik	0.0442569	1	0.0375687	1	0.00273789	1	1	0.0281878
4833418N02Rik	0.00900234	1	0.0585736	1	-0.00520782	1	1	0.0207894
4833420G17Rik	-0.00916894	1	0.0234646	1	-0.038317	1	1	-0.00800711
4833439L19Rik	0.0188706	1	0.0974246	1	-0.0295279	1	1	0.0289224
4921524J17Rik	0.0956949	1	-0.101323	1	0.0143722	1	1	0.00291459
4930402H24Rik	-0.00213826	1	0.0319992	1	0.0105106	1	1	0.0134572
4930403P22Rik	-0.00231635	1	-0.00823864	1	-0.0107566	1	1	-0.00710385
4930430F08Rik	-0.0293703	1	0.0198988	1	-0.00873922	1	1	-0.00607027
4930453N24Rik	0.000188835	1	-0.0124993	1	-0.00670598	1	1	-0.00633882
4930471E19Rik	-0.00970209	1	-0.0157674	1	-0.0149421	1	1	-0.0134705
4930503L19Rik	-0.00738269	1	0.0141615	1	0.0652395	1	1	0.0240061
4930522L14Rik	-0.0056749	1	0.00258623	1	-0.016333	1	1	-0.00647389
4930523C07Rik	0.0210295	1	-0.00605225	1	-0.13061	1	1	-0.0385443
4930579C12Rik	0.125443	1	-0.240949	1	0.0348366	1	1	-0.0268898
4930579G24Rik	-0.020525	1	0.00892641	1	-0.0230156	1	1	-0.0115381
4931406C07Rik	-0.0727957	1	-0.000195254	1	-0.00780857	1	1	-0.0269332
4931406P16Rik	-0.0530327	1	-0.0316888	1	-0.0682608	1	1	-0.0509941
4931428F04Rik	-0.0115427	1	0.068759	1	0.0100674	1	1	0.0224279
4932422M17Rik	0.0328004	1	-0.122451	1	0.0175006	1	1	-0.02405
4932438A13Rik	0.00665254	1	-0.0720936	1	-0.00543599	1	1	-0.0236257
4932438H23Rik	0.125235	2.12569e-05	0.122217	0.0729233	0.264403	1.31153e-10	1.40256e-13	0.170618
4933404O12Rik	0.0110487	1	-0.00306475	1	-0.0107718	1	1	-0.000929293
4933427D14Rik	-0.0180272	1	-0.0666801	1	-0.0394465	1	1	-0.0413846
4933434E20Rik	0.00623715	1	-0.0150304	1	-0.0481143	1	1	-0.0189692
5031425E22Rik	-0.0388022	1	0.0211701	1	-0.076331	1	1	-0.031321
5031439G07Rik	-0.0270503	1	-0.0436271	1	-0.0102422	1	1	-0.0269732
5033406O09Rik	0.00761513	1	-0.0025393	1	0.000763657	1	1	0.00194649
5033430I15Rik	0.013258	1	-0.066544	1	-0.0159027	1	1	-0.0230629
5430403G16Rik	-0.0166483	1	0.0200191	1	-0.0155576	1	1	-0.00406226
5430416N02Rik	-0.0476009	1	-0.0546046	1	0.00155894	1	1	-0.0335489
5730409E04Rik	0.0150231	1	-0.0189595	1	-0.00524121	1	1	-0.00305921
5730455P16Rik	0.0210789	1	-0.0490639	1	-0.0578143	1	1	-0.0285997
5730480H06Rik	-0.0294942	1	-0.0435585	1	-0.0415597	1	1	-0.0382041
5730559C18Rik	0.0114237	1	0.326444	1	-0.0250172	1	1	0.104283
5930430L01Rik	0.000656525	1	0.0852054	1	0.00316896	1	1	0.029677
6030458C11Rik	-0.0220115	1	0.255213	1	-0.0281375	1	1	0.0683546
6330403L08Rik	0.0255153	1	0.0109074	1	0.0114717	1	1	0.0159648
6330418K02Rik	-0.00208942	1	0.00385513	1	-0.0116369	1	1	-0.00329038
6330562C20Rik	0.000808922	1	0.0145138	1	0.00128692	1	1	0.00553654
6720489N17Rik	0.00699514	1	-0.0301696	1	-0.00283998	1	1	-0.00867149
8030462N17Rik	0.029159	1	0.124969	1	0.0032984	1	1	0.0524754
9030025P20Rik	-0.0190309	1	0.0302729	1	-0.0216888	1	1	-0.00348225
9030624J02Rik	-0.0642845	1	-0.0717182	1	-0.018964	1	1	-0.0516556
9130008F23Rik	0.0276982	1	0.00168269	1	-0.00209678	1	1	0.00909469
9130011E15Rik	-0.00961954	1	-0.019061	1	-0.000517351	1	1	-0.00973264
9130401M01Rik	0.000726389	1	0.0214417	1	-0.0119684	1	1	0.00339991
9230102O04Rik	-0.01079	1	0.0259213	1	-0.0125167	1	1	0.000871562
9330020H09Rik	0.00214339	1	-0.00918787	1	0.00224707	1	1	-0.00159913
9330175E14Rik	0.00261995	1	-0.040271	1	-0.0253048	1	1	-0.0209853
9430015G10Rik	0.010644	1	-0.00507283	1	-0.0227196	1	1	-0.00571616
9430037G07Rik	0.00764941	1	-0.0497431	1	-2.68247e-05	1	1	-0.0140402
9430038I01Rik	-0.0234386	1	-0.0688748	1	0.0148099	1	1	-0.0258345
9530068E07Rik	-0.00211176	1	0.198866	1	0.0221343	1	1	0.0729628
9530077C05Rik	-0.0129008	1	-0.0279542	1	-0.00553005	1	1	-0.0154617
9530082P21Rik	-0.00361785	1	-0.0644281	1	-0.0641435	1	1	-0.0440631
9930021J03Rik	-0.0738858	1	-0.117083	1	-0.145048	1	1	-0.112006
9930104L06Rik	-0.00873712	1	0.00768239	1	0.0119197	1	1	0.00362167
9930111J21Rik2	0.140517	1	0.0503945	1	0.0235838	1	1	0.0714983
A130010J15Rik	-0.0028325	1	-0.033347	1	-0.0292023	1	1	-0.0217939
A130051J06Rik	-0.0234835	1	-0.0162816	1	0.0474281	1	1	0.00255433
A230050P20Rik	-0.0382045	1	-0.0705649	1	-0.0563081	1	1	-0.0550258
A330069E16Rik	-0.00084692	1	-0.0991725	1	-0.00844619	1	1	-0.0361552
A330074K22Rik	-0.00868758	1	-0.000472095	1	0.0169585	1	1	0.0025996
A430005L14Rik	0.025458	1	-0.0710246	1	-0.0174469	1	1	-0.0210045
A430046D13Rik	-0.00203555	1	0.0206642	1	0.00369203	1	1	0.00744023
A430105I19Rik	0.00281501	1	0.00818051	1	-0.012204	1	1	-0.000402816
A530017D24Rik	0.00882102	1	0.0476646	1	0.0143259	1	1	0.0236039
A630001G21Rik	0.0162285	1	-0.0126212	1	-0.00273562	1	1	0.00029056
A630072M18Rik	0.00601121	1	0.0121062	1	-0.0161218	1	1	0.000665177
A630089N07Rik	0.0161069	1	0.0484913	1	0.0129005	1	1	0.0258329
A830010M20Rik	-0.0117927	1	-0.0167301	1	-0.0127369	1	1	-0.0137533
A830082K12Rik	-0.0108864	1	0.0125454	1	-0.0246527	1	1	-0.00766457
A930004D18Rik	0.00637222	1	-0.0471586	1	-0.00792017	1	1	-0.0162355
A930015D03Rik	-0.00800061	1	0.00942849	1	-0.0205801	1	1	-0.00638409
AA467197	0.233987	1	-0.101775	1	-0.179026	1	1	-0.0156045
Aaas	0.0220662	1	-0.051111	1	0.00647012	1	1	-0.00752489
Aacs	-0.00110245	1	-0.0241572	1	-0.0102968	1	1	-0.0118522
Aaed1	-0.0338469	1	-0.0281777	1	0.0544899	1	1	-0.00251157
Aagab	0.00772497	1	-0.0674251	1	-0.00760768	1	1	-0.0224359
Aak1	-0.0129056	1	-0.0271523	1	0.0254981	1	1	-0.00485326
Aamdc	-0.0256635	1	-0.0521208	1	-0.0402839	1	1	-0.0393561
Aamp	-0.0610991	1	-0.124014	1	0.0448143	1	1	-0.0467664
Aar2	-0.00254709	1	-0.0554321	1	-0.020377	1	1	-0.0261187
Aars	0.0284962	1	-0.176222	1	-0.00796606	1	1	-0.0518974
Aars2	0.0109512	1	-0.0101717	1	-0.00249212	1	1	-0.000570894
Aarsd1	-0.0017808	1	0.0222509	1	-0.00834722	1	1	0.00404097
Aasdh	-0.0036897	1	-0.0137766	1	-0.00650567	1	1	-0.00799064
Aasdhppt	-0.0896588	1	0.080579	1	-0.030416	1	1	-0.0131653
Aatf	0.00963452	1	-0.0561022	1	0.109232	1	1	0.0209216
Aatk	-0.00363559	1	-0.0349685	1	0.0324474	1	1	-0.00205224
Abca2	-0.00364043	1	-0.00984866	1	-0.0133399	1	1	-0.008943
Abca3	-0.0389749	1	0.0403828	1	0.0927811	1	1	0.0313963
Abca7	-0.0177076	1	0.00289151	1	0.0160818	1	1	0.000421927
Abcb10	0.021803	1	-0.0129931	1	0.0359585	1	1	0.0149228
Abcb1a	0.00426923	1	-0.00645396	1	0.0455033	1	1	0.0144395
Abcb1b	-0.0295167	1	0.145506	1	-0.0276533	1	1	0.0294455
Abcb7	0.017814	1	-0.00590758	1	0.0994453	1	1	0.0371172
Abcb8	0.00724814	1	-0.0945297	1	-0.016769	1	1	-0.0346835
Abcc1	0.00438993	1	-0.0623471	1	0.0593212	1	1	0.000454686
Abcc3	0.0912059	1	0.241059	1	-0.0811311	1	1	0.0837113
Abcc5	-0.0202191	1	-0.00301529	1	0.012466	1	1	-0.00358945
Abcd1	-0.0167626	1	-0.0224158	1	-0.0162955	1	1	-0.0184913
Abcd3	-0.0473946	1	-0.00422036	1	0.00576731	1	1	-0.0152825
Abcd4	0.00421452	1	0.045808	1	0.00283445	1	1	0.017619
Abce1	0.035848	1	0.119903	1	0.0105877	1	1	0.0554461
Abcf1	0.0641784	1	-0.0870661	1	0.0627544	1	1	0.0132889
Abcf2	0.0173206	1	-0.0467616	1	-0.00896222	1	1	-0.0128011
Abcf3	-0.0197973	1	-0.119224	1	-0.0122036	1	1	-0.0504082
Abcg2	0.116506	1	0.148747	1	0.223982	0.0328311	0.336591	0.163078
Abhd10	0.00315244	1	0.0168573	1	-0.00216898	1	1	0.00594693
Abhd11	-0.0155675	1	-0.0955409	1	0.0326936	1	1	-0.0261383
Abhd12	0.00580782	1	-0.00398501	1	0.0466968	1	1	0.0161732
Abhd13	0.0107207	1	0.0290821	1	-0.0362083	1	1	0.00119819
Abhd14a	-0.00916235	1	-0.0651335	1	-0.0377305	1	1	-0.0373421
Abhd14b	0.000887637	1	-0.0198699	1	-0.0126051	1	1	-0.0105291
Abhd16a	-0.0709343	1	-0.154507	1	-0.0327574	1	1	-0.0860661
Abhd17a	-0.00560818	1	0.0365953	1	0.00627461	1	1	0.0124206
Abhd17b	-0.0327961	1	-0.166196	1	-0.0442022	1	1	-0.0810649
Abhd17c	-0.0355398	1	0.00619892	1	-0.0170684	1	1	-0.0154698
Abhd18	0.0045503	1	-0.051935	1	-0.0258244	1	1	-0.024403
Abhd2	-0.0450438	1	-0.0427979	1	-0.0629225	1	1	-0.0502547
Abhd4	0.027292	1	6.43821e-05	1	0.0228038	1	1	0.0167201
Abhd5	0.0417577	1	-0.0632829	1	-0.00856002	1	1	-0.0100284
Abhd6	-0.000645067	1	-0.0235986	1	-0.006858	1	1	-0.0103672
Abhd8	0.0793665	1	-0.0912884	1	0.121797	1	1	0.0366251
Abi1	-0.0512163	1	-0.0583916	1	0.0609543	1	1	-0.0162179
Abi2	-0.0306521	1	0.00107582	1	-0.0492527	1	1	-0.0262763
Abl1	-0.0692739	1	-0.0706025	1	-0.0551822	1	1	-0.0650195
Abl2	-0.0395506	1	-0.0317013	1	0.044726	1	1	-0.00884195
Ablim1	-0.00632056	1	-0.0423327	1	0.0316649	1	1	-0.00566279
Abr	-0.00462901	1	-0.11482	1	0.057943	1	1	-0.0205021
Abracl	-0.0187253	1	-0.041265	1	-0.0303708	1	1	-0.0301204
Abraxas1	0.0283618	1	-0.0166543	1	-0.000640337	1	1	0.00368905
Abraxas2	-0.0103223	1	-0.0858629	1	-0.00401337	1	1	-0.0333995
Abt1	-0.0201625	1	-0.058923	1	-0.0156231	1	1	-0.0315696
Abtb1	0.0133013	1	0.00652989	1	-0.01139	1	1	0.00281375
Abtb2	-0.0176634	1	-0.00798765	1	0.012107	1	1	-0.00451467
AC127341.3	-0.147178	0.10302	-0.16035	1	-0.0924808	1	0.603256	-0.133336
AC129328.1	0.0141878	1	-0.00812088	1	-0.0104162	1	1	-0.00144974
AC149090.1	-0.0835003	1	-0.133018	1	-0.0451107	1	1	-0.0872098
AC160336.1	0.111401	0.0507799	-1.02001	1	-0.458144	1	0.427629	-0.455585
AC163032.1	-0.0204039	1	-0.0121078	1	0.00299597	1	1	-0.0098386
AC164424.1	-0.0134447	1	-0.00531887	1	0.00373427	1	1	-0.00500977
AC165953.2	-0.0357104	1	-0.0728333	1	-0.0656642	1	1	-0.0580693
Acaa1a	-0.0221859	1	-0.189739	1	0.0241283	1	1	-0.062599
Acaa1b	-0.0258379	1	-0.10556	1	0.0208843	1	1	-0.0368379
Acaa2	0.0991963	1	0.132351	1	0.188786	1	1	0.140111
Acaca	0.0442628	1	-0.00103133	1	-0.000234548	1	1	0.0143323
Acad8	0.015673	1	-0.0619327	1	0.00274399	1	1	-0.0145052
Acad9	0.0039566	1	-0.041048	1	-0.0370794	1	1	-0.0247236
Acadl	0.235078	0.0094271	0.33099	1	0.133306	1	0.155937	0.233125
Acadm	0.0461514	1	-0.0802226	1	0.0939739	1	1	0.0199676
Acads	-0.0160464	1	-0.137361	1	0.0231555	1	1	-0.0434174
Acadsb	-0.0118238	1	-0.000549318	1	-0.0198985	1	1	-0.0107572
Acadvl	-0.00346327	1	-0.103086	1	0.0345225	1	1	-0.0240089
Acap1	0.187434	0.00282461	-0.0946475	1	0.168059	1	0.0680568	0.0869487
Acap2	-0.0113453	1	-0.0281635	1	0.144954	1	1	0.0351484
Acap3	-0.00920964	1	-0.0402894	1	-0.019283	1	1	-0.0229274
Acat1	-0.0131094	1	-0.210354	1	-0.123072	1	1	-0.115512
Acat2	-0.036229	1	-0.0577171	1	-0.00318599	1	1	-0.0323774
Acbd3	0.0418779	1	0.00285673	1	0.0116176	1	1	0.0187841
Acbd4	-0.0220856	1	0.0174816	1	-0.0232496	1	1	-0.00928453
Acbd5	0.0303549	1	0.00550361	1	0.00125942	1	1	0.0123726
Acbd6	0.114142	1	-0.0871454	1	0.104802	1	1	0.0439331
Accs	0.0177723	1	0.0276421	1	-0.00774161	1	1	0.0125576
Acd	0.000646116	1	-0.166558	1	-0.0795541	1	1	-0.0818219
Ace	0.00600687	1	0.0409303	1	-0.142958	1	1	-0.0320069
Acer3	0.0447952	1	-0.00755241	1	0.0124313	1	1	0.016558
Acin1	-0.0535452	1	-0.0131693	1	0.00220882	1	1	-0.0215019
Ackr3	0.0684889	1	0.102752	1	-0.0039227	1	1	0.0557728
Acly	-0.106596	1	0.0112295	1	0.0392635	1	1	-0.0187008
Aco1	0.0140909	1	-0.0274164	1	-0.0236137	1	1	-0.012313
Aco2	0.0207691	1	0.00380336	1	-0.0243294	1	1	8.10266e-05
Acod1	-0.0186128	1	-0.0180714	1	0.0108894	1	1	-0.00859831
Acot13	0.0353964	1	-0.0321504	1	0.0862324	1	1	0.0298261
Acot2	-0.00368735	1	-0.0345972	1	-0.00817815	1	1	-0.0154876
Acot7	0.0320146	1	0.202282	1	0.0944466	1	1	0.109581
Acot8	-0.00816251	1	-0.000564962	1	0.0137286	1	1	0.00166703
Acot9	-0.0168748	1	-0.152636	1	0.00979414	1	1	-0.0532387
Acox1	-0.0517531	1	0.0394829	1	-0.00338837	1	1	-0.00521953
Acox3	0.0194688	1	-0.0114884	1	-0.00786074	1	1	3.98943e-05
Acoxl	0.0038474	1	-0.0170568	1	0.00370685	1	1	-0.00316753
Acp1	0.0490465	1	-0.0360998	1	-0.0439091	1	1	-0.0103208
Acp2	-0.00195176	1	0.0569346	1	0.0122972	1	1	0.0224267
Acp5	0.00577032	1	-0.154126	1	0.00641414	1	1	-0.0473138
Acp6	-0.0131617	1	-0.0542692	1	0.0122948	1	1	-0.0183787
Acsbg1	0.151196	0.413514	-0.0335563	1	0.218057	0.0021284	0.0288541	0.111899
Acsf2	-0.00827988	1	0.013847	1	-0.00204536	1	1	0.00117393
Acsf3	0.00480552	1	-0.0175694	1	-0.0189127	1	1	-0.0105589
Acsl1	-0.0149992	1	-0.0168171	1	-0.00353196	1	1	-0.0117828
Acsl3	-0.0334534	1	0.0606876	1	0.149622	1	1	0.0589522
Acsl4	0.0462208	1	0.102615	1	0.326474	1	1	0.158437
Acsl5	0.0607752	1	-0.0259849	1	0.0321037	1	1	0.022298
Acsl6	-0.0555078	6.14851e-06	-0.0538083	1	-0.0510099	0.0615679	4.73618e-05	-0.053442
Acss2	-0.0167732	1	-0.0399971	1	-0.0157745	1	1	-0.0241816
Acta2	-0.0012336	1	-0.0263003	1	-0.0115186	1	1	-0.0130175
Actb	0.179311	1	0.124772	1	0.0671368	1	1	0.12374
Actg1	0.170558	1	-0.112011	1	0.219229	1	1	0.0925921
Actl6a	-0.017093	1	-0.0395421	1	0.019639	1	1	-0.012332
Actn1	-0.0881274	1	-0.048305	1	0.059207	1	1	-0.0257418
Actn4	0.0194982	1	-0.146188	1	-0.000236142	1	1	-0.0423087
Actr10	-0.0439149	1	-0.141424	1	-0.0568164	1	1	-0.0807183
Actr1a	-0.015817	1	-0.235135	1	-0.0454066	1	1	-0.0987861
Actr1b	0.0603116	1	-0.0995506	1	0.0570898	1	1	0.00595026
Actr2	0.0330915	1	-0.169752	1	0.132421	1	1	-0.00141332
Actr3	0.0849706	1	-0.0416373	1	0.120875	1	1	0.0547361
Actr5	-0.0253699	1	-0.0496605	1	-0.0200033	1	1	-0.0316779
Actr6	0.0207155	1	-0.0560564	1	-0.0100138	1	1	-0.0151182
Actr8	0.0320024	1	-0.0137088	1	0.0110179	1	1	0.00977052
Acvr1	-0.0511496	1	-0.0443473	1	-0.00587283	1	1	-0.0337899
Acvr1b	-0.00114028	1	-0.0399522	1	0.0176597	1	1	-0.00781094
Acvr2a	-0.00911633	1	0.0284761	1	-0.0181808	1	1	0.000392967
Acvr2b	-0.0154653	1	-0.0177721	1	-0.0175513	1	1	-0.0169295
Acy1	0.0281253	1	-0.0455152	1	-0.0229259	1	1	-0.0134386
Acyp1	-0.0501721	1	-0.109526	1	-0.0865468	1	1	-0.0820816
Acyp2	-0.0877517	1	-0.134579	1	-0.118956	0.0546821	0.444526	-0.113762
Ada	-0.00301205	1	0.0225349	1	-0.0250335	1	1	-0.00183686
Adal	-0.00726729	1	-0.000762541	1	-0.000723137	1	1	-0.00291766
Adam10	-0.0112161	1	-0.0324649	1	0.141537	1	1	0.0326186
Adam12	0.0134803	1	0.0502295	1	0.0121453	1	1	0.025285
Adam15	-0.02576	1	0.0507823	1	-0.0158699	1	1	0.00305081
Adam17	0.0161897	1	-0.139232	1	-0.0523657	1	1	-0.0584692
Adam19	-5.1132e-05	1	-0.0269972	1	0.00302973	1	1	-0.00800619
Adam33	-0.00669345	1	-0.119033	1	-0.0309625	1	1	-0.0522295
Adam8	-0.0345225	1	-0.136262	1	0.0523914	1	1	-0.0394645
Adam9	0.0243664	1	-0.0392324	1	0.118431	1	1	0.0345216
Adamts1	-0.0112945	1	0.206807	1	0.0475189	1	1	0.0810105
Adamts10	0.0182165	1	-0.00431135	1	-0.0207298	1	1	-0.00227488
Adamts14	-0.0212582	1	-0.0234934	1	-0.0395523	1	1	-0.0281013
Adamts4	0.00556268	1	0.0656594	1	-0.0228026	1	1	0.0161398
Adamts6	-0.0208177	1	0.10451	1	0.029897	1	1	0.0378632
Adamts8	0.0271222	1	-0.0112063	1	-0.0322957	1	1	-0.00545993
Adamtsl3	-0.0279849	1	-0.0732757	1	-0.00414946	1	1	-0.0351367
Adar	-0.00381026	1	-0.0583954	1	-0.0219286	1	1	-0.0280448
Adarb1	-0.0207056	1	-0.165623	1	0.133917	1	1	-0.0174707
Adat1	-0.0165308	1	-0.0149807	1	-0.0190773	1	1	-0.0168629
Adat2	0.0461759	1	0.135312	1	0.0404245	1	1	0.0739708
Adck1	-0.016548	1	0.00397324	1	-0.0212004	1	1	-0.0112584
Adck2	-0.00381698	1	-0.0375592	1	-0.000786903	1	1	-0.0140543
Adck5	0.000153994	1	0.136655	1	0.0081608	1	1	0.0483231
Adcy3	-0.0345738	1	-0.0178567	1	-0.0355417	1	1	-0.029324
Adcy6	0.00775628	1	0.00369496	1	-0.0154839	1	1	-0.00134422
Adcy7	0.0534503	1	-0.0445392	1	0.0341349	1	1	0.0143487
Add1	-0.0434072	1	-0.10448	1	-0.0513732	1	1	-0.0664201
Add2	0.113742	1	-0.0294036	1	0.147194	0.000658337	0.0231467	0.0771773
Add3	-0.0495961	1	-0.0381913	1	-0.0342808	1	1	-0.0406894
Adgra3	-0.0315059	1	0.115188	1	-0.0679133	1	1	0.00525617
Adgre5	-0.0223892	1	-0.0226971	1	-0.00510442	1	1	-0.0167302
Adgrg3	0.143359	6.72582e-08	0.0259191	1	0.345513	5.19167e-20	6.69558e-24	0.171597
Adgrg6	-0.00548574	1	-0.0565495	1	0.0600784	1	1	-0.000652285
Adgrl1	-0.0125451	1	-0.0212442	1	0.0363392	1	1	0.000849958
Adgrl2	-0.032815	1	-0.107149	1	-0.042113	1	1	-0.0606923
Adh5	0.0014613	1	0.0974931	1	0.040638	1	1	0.0465308
Adi1	-0.0277318	1	-0.0106113	1	0.00980145	1	1	-0.00951387
Adipor1	0.111995	1	0.0561463	1	0.0931717	1	1	0.0871044
Adipor2	-0.0433915	1	-0.0257222	1	0.0469806	1	1	-0.00737771
Adk	0.00569706	1	-0.00429977	1	-0.0774851	1	1	-0.0253626
Adm	-0.0384663	1	-0.0983174	1	0.0363867	1	1	-0.0334657
Adnp	-0.000256152	1	0.07588	1	0.0189125	1	1	0.0315121
Adnp2	-0.0157698	1	-0.0504883	1	-0.00569215	1	1	-0.0239834
Ado	-0.0521832	1	-0.114685	1	0.0624718	1	1	-0.0347988
Adpgk	-0.0236296	1	-0.09915	1	-0.000440959	1	1	-0.0410735
Adprh	-0.0441005	1	-0.0798662	1	0.0520051	1	1	-0.0239872
Adprhl2	-0.0285372	1	-0.0278117	1	0.035803	1	1	-0.00684864
Adprm	-0.0276242	1	-0.00454005	1	-0.0190779	1	1	-0.0170807
Adrm1	-0.0390763	1	-0.112154	1	-0.0271362	1	1	-0.0594556
Adsl	0.0337607	1	0.0542319	1	-0.0236217	1	1	0.021457
Adss	-0.0252521	1	0.0166615	1	0.0724851	1	1	0.0212981
Adssl1	-0.00502973	1	0.049919	1	0.0834254	1	1	0.0427716
Aebp1	-0.0207169	1	-0.0558512	1	0.0116075	1	1	-0.0216535
Aebp2	-0.00511062	1	-0.104039	1	0.0711156	1	1	-0.012678
Aen	-0.00804991	1	-0.0889406	1	-0.0121946	1	1	-0.036395
Aes	0.056758	1	-0.0758786	1	0.0517203	1	1	0.0108666
Afap1	-0.0954207	1	0.0145092	1	-0.0582563	1	1	-0.0463893
Afap1l2	-0.0279907	1	-0.0252268	1	0.00567577	1	1	-0.0158472
Afdn	-0.080642	1	-0.0589212	1	-0.141922	1	1	-0.0938285
Aff1	-0.0191396	1	-0.159162	1	-0.0173976	1	1	-0.0652332
Aff4	-0.115171	1	0.0322186	1	0.0282604	1	1	-0.0182307
Afg1l	-0.00228371	1	-0.00117706	1	-0.000397423	1	1	-0.00128607
Afg3l1	-0.0172309	1	-0.0469413	1	0.0388289	1	1	-0.00844779
Afg3l2	-0.007583	1	-0.0734267	1	-0.0316282	1	1	-0.037546
Afmid	0.000584921	1	0.00444845	1	0.0185907	1	1	0.0078747
Aftph	0.0192823	1	0.0669757	1	0.0382757	1	1	0.0415112
Aga	0.0665219	1	-0.029315	1	0.0227386	1	1	0.0199818
Agap1	0.0121417	1	0.0758219	1	0.0656902	1	1	0.051218
Agap3	-0.00804535	1	-0.089821	1	-0.0210817	1	1	-0.0396494
Agbl3	0.00876352	1	-0.01995	1	-0.0328293	1	1	-0.0146719
Agbl5	-0.00243022	1	-0.0173754	1	-0.00673015	1	1	-0.00884526
Agfg1	-0.0286877	1	0.288799	1	0.0562124	1	1	0.105441
Agfg2	-0.00679101	1	-0.0415877	1	0.0198513	1	1	-0.00950913
Aggf1	-6.01276e-05	1	-0.0300342	1	0.0592184	1	1	0.00970803
Agk	-0.00114274	1	0.00587959	1	0.00027084	1	1	0.00166923
Agl	-0.0481049	1	-0.0817959	1	0.00264164	1	1	-0.0424197
Ago1	0.0144714	1	0.0272946	1	-0.0245654	1	1	0.00573356
Ago2	-0.0859341	1	-0.118943	1	-0.049425	1	1	-0.0847673
Ago3	-0.0458527	1	-0.049737	1	-0.0455536	1	1	-0.0470478
Agpat1	0.031242	1	-0.0193444	1	0.0882108	1	1	0.0333695
Agpat2	0.024152	1	-0.0508028	1	-0.0371382	1	1	-0.021263
Agpat3	0.0448644	1	-0.101078	1	0.000657598	1	1	-0.0185187
Agpat4	-0.0544079	0.424365	0.0226198	1	-0.11574	0.154858	0.488152	-0.0491762
Agpat5	0.105349	1	0.108498	1	0.231174	1	1	0.14834
Agps	0.014055	1	0.0907596	1	9.75974e-05	1	1	0.0349708
Agrn	0.0417443	1	0.0415137	1	-0.00851136	1	1	0.0249155
Agtpbp1	0.00102574	1	-0.0392352	1	-0.0124172	1	1	-0.0168756
Agtrap	0.00465261	1	-0.061065	1	-0.0150603	1	1	-0.0238242
Ahctf1	0.00651244	1	0.0159641	1	-0.0155652	1	1	0.00230376
Ahcy	0.000341096	1	-0.00615881	1	-0.00205302	1	1	-0.00262358
Ahcyl1	0.000938801	1	0.0722745	1	0.0182049	1	1	0.0304727
Ahcyl2	-0.0348553	1	-0.0251173	1	-0.00671224	1	1	-0.0222283
Ahdc1	-0.05049	1	0.0744921	1	-0.0482059	1	1	-0.00806797
Ahi1	-0.0269399	1	-0.0115588	1	-0.030302	1	1	-0.0229336
Ahnak	-0.0354996	1	-0.131198	1	0.0897562	1	1	-0.0256471
Ahnak2	-0.106343	1	-0.113297	1	0.140232	1	1	-0.0264694
Ahr	-0.0459459	1	0.095575	1	0.0415585	1	1	0.0303959
Ahsa1	-0.0318153	1	-0.0339982	1	-0.0825243	1	1	-0.049446
Ahsa2	-0.0221953	1	-0.0041767	1	-0.0638647	1	1	-0.0300789
AI314180	-0.0858001	1	-0.0247411	1	0.183662	1	1	0.0243737
AI413582	-0.111319	1	-0.192679	1	-0.0269724	1	1	-0.110323
AI467606	0.0197763	1	-0.0428987	1	-0.00301511	1	1	-0.00871252
AI480526	0.0277029	1	0.00446336	1	-0.034933	1	1	-0.000922253
AI597479	-0.0128945	1	-0.04533	1	0.00322626	1	1	-0.0183328
AI606181	-0.00863047	1	0.0249557	1	-0.0149844	1	1	0.00044695
AI661453	0.0178217	1	0.021288	1	0.0281883	1	1	0.0224327
AI837181	-0.1026	1	-0.290692	1	-0.0924385	1	1	-0.16191
AI987944	-0.01	1	-0.0134096	1	-0.0144645	1	1	-0.0126247
Aida	0.0161171	1	-0.0898526	1	0.00937018	1	1	-0.0214551
Aif1l	0.0245096	1	-0.0279224	1	0.0557469	1	1	0.0174447
Aifm1	0.00363658	1	-0.0734229	1	-0.0759002	1	1	-0.0485622
Aifm2	-0.0487021	1	-0.0261114	1	-0.00901833	1	1	-0.0279439
Aig1	0.218344	0.0207335	0.0172344	1	0.165602	1	0.25684	0.133727
Aimp1	0.0724984	1	0.0680207	1	0.0596647	1	1	0.0667279
Aimp2	0.0279027	1	0.107155	1	-0.0381233	1	1	0.0323115
Aip	0.0261874	1	-0.182895	1	0.0222502	1	1	-0.0448192
Airn	-0.0114288	1	-0.00787758	1	-0.00238714	1	1	-0.00723119
Ajuba	0.0195042	1	0.0588695	1	0.0584185	1	1	0.0455974
Ak1	-0.0204214	1	0.0083413	1	-0.0106262	1	1	-0.00756878
Ak2	0.00629687	1	-0.0344876	1	0.041056	1	1	0.00428843
Ak3	-0.0505666	1	-0.0669962	1	-0.0332416	1	1	-0.0502682
Ak4	-0.00177724	1	-0.0010496	1	-0.0130655	1	1	-0.00529744
Ak6	0.0337731	1	0.0454447	1	0.116845	1	1	0.0653544
Akap1	-4.85714e-05	1	0.0656876	1	-0.0372838	1	1	0.00945176
Akap10	-0.00685314	1	-0.0679625	1	-0.000182673	1	1	-0.0249994
Akap11	0.015663	1	-0.0714529	1	-0.00430236	1	1	-0.0200307
Akap12	-0.0236568	1	-0.00885598	1	-0.0218214	1	1	-0.0181114
Akap13	-0.0321735	1	-0.00508987	1	-0.02241	1	1	-0.0198911
Akap2	-0.0867992	1	-0.0706066	1	-0.023121	1	1	-0.0601756
Akap7	-0.0269746	1	-0.0220238	1	-0.0327591	1	1	-0.0272525
Akap8	-0.0123726	1	-0.0798202	1	-0.0584609	1	1	-0.0502179
Akap8l	-0.0559591	1	-0.0804366	1	-0.0356119	1	1	-0.0573358
Akap9	-0.0144466	1	0.04657	1	0.0436044	1	1	0.0252426
Akirin1	-0.0647383	1	-0.28618	1	-0.00198648	1	1	-0.117635
Akirin2	-0.0540678	1	-0.0803028	1	0.0210721	1	1	-0.0377662
Akr1a1	0.113947	1	0.211791	1	0.0150628	1	1	0.1136
Akr1b10	-0.00176531	1	-0.109211	1	-0.0608682	1	1	-0.0572815
Akr1b3	-0.0151319	1	-0.0110294	1	0.030473	1	1	0.00143723
Akr1b8	0.00327756	1	-0.13606	1	0.0686666	1	1	-0.0213721
Akr1e1	-0.00771598	1	-0.0095149	1	0.00268426	1	1	-0.00484887
Akr7a5	-0.0302105	1	0.113768	1	-0.0214136	1	1	0.0207145
Akt1	0.0233652	1	0.0238619	1	0.0293874	1	1	0.0255382
Akt1s1	-0.0529137	1	-0.112249	1	-0.0367491	1	1	-0.067304
Akt2	-0.00987591	1	-0.0670845	1	-0.0156924	1	1	-0.0308843
Akt3	0.0265866	1	0.0641353	1	-0.011026	1	1	0.0265653
Aktip	0.00658114	1	-0.116287	1	-0.0146089	1	1	-0.0414383
AL590144.2	-0.0262462	1	-0.0362938	1	-0.0227202	1	1	-0.0284201
Alad	0.0224128	1	0.0336198	1	-0.110226	1	1	-0.0180643
Alas1	-0.0387899	1	-0.0588015	1	-0.0280496	1	1	-0.0418803
Alcam	0.142099	1	0.144495	1	0.252025	0.335387	0.901928	0.17954
Aldh16a1	0.00498098	1	0.013413	1	-0.0285755	1	1	-0.00339384
Aldh18a1	-0.00393621	1	-0.0593806	1	-0.00254372	1	1	-0.0219535
Aldh2	0.0512965	1	0.0092953	1	-0.110945	1	1	-0.0167845
Aldh3a2	-0.023344	1	-0.0480628	1	-0.0366004	1	1	-0.0360024
Aldh3b1	0.00172332	1	0.0989936	1	-0.0334935	1	1	0.0224078
Aldh5a1	0.0240768	1	0.107371	1	0.0293568	1	1	0.0536014
Aldh7a1	0.0705841	1	0.082861	1	0.00649983	1	1	0.053315
Aldh9a1	0.0227069	1	-0.0295293	1	0.0224214	1	1	0.00519965
Aldoa	0.048493	1	-0.185433	1	0.15665	1	1	0.00657007
Aldoc	-0.0525351	1	-0.204032	1	0.012735	1	1	-0.0812772
Alg1	-0.010206	1	-0.0737058	1	-0.0103794	1	1	-0.0314304
Alg10b	-0.0190069	1	-0.0486278	1	-0.00759806	1	1	-0.0250776
Alg11	-0.00422572	1	-0.0377324	1	0.0106139	1	1	-0.0104481
Alg12	-0.0116592	1	-0.00358799	1	0.00120685	1	1	-0.00468011
Alg13	-0.0119174	1	0.0166725	1	-0.00615318	1	1	-0.000466013
Alg14	0.00843989	1	-0.0734418	1	0.00450958	1	1	-0.0201641
Alg2	-0.0140655	1	-0.0367131	1	-0.00734226	1	1	-0.0193736
Alg3	-0.000198312	1	0.000105569	1	-0.00338138	1	1	-0.00115804
Alg5	0.056792	1	0.0620735	1	0.0733542	1	1	0.0640732
Alg6	0.00824528	1	0.01009	1	-0.0071064	1	1	0.00374295
Alg8	-0.000907996	1	-0.0396004	1	0.0221749	1	1	-0.00611114
Alg9	0.00804117	1	0.00242869	1	-0.0316366	1	1	-0.00705558
Alkbh1	0.00160337	1	0.0552777	1	-0.0244144	1	1	0.0108222
Alkbh2	0.0130083	1	-0.0151763	1	0.0102051	1	1	0.00267902
Alkbh3	-0.0275101	1	-0.0241788	1	0.0138253	1	1	-0.0126212
Alkbh4	-0.00836133	1	-0.0230264	1	-0.00237914	1	1	-0.0112556
Alkbh5	-0.0567972	1	-0.177441	1	0.055111	1	1	-0.059709
Alkbh6	0.000652084	1	-0.024387	1	-0.00880256	1	1	-0.0108458
Alkbh7	0.0162328	1	0.290234	1	-0.0316052	1	1	0.0916206
Alkbh8	-0.00687098	1	-0.00821497	1	-0.041778	1	1	-0.0189547
Alms1	-0.0072892	1	-0.00553589	1	-0.0142171	1	1	-0.00901408
Alpk1	0.00681628	1	-0.0120056	1	-0.0118514	1	1	-0.00568024
Als2	-0.00966169	1	-0.0144347	1	0.00637972	1	1	-0.00590556
Als2cl	0.00677308	1	0.0711394	1	0.0177372	1	1	0.0318832
Alyref	-0.0135566	1	-0.24463	1	-0.0791183	1	1	-0.112435
Alyref2	-0.00614514	1	-0.0126195	1	-0.00553076	1	1	-0.00809846
Amacr	-0.00211303	1	-0.0742052	1	-0.00482508	1	1	-0.0270478
Ambra1	0.00970109	1	-0.00560709	1	-0.0189482	1	1	-0.00495139
Amd1	-0.0325086	1	-0.168736	1	-0.034568	1	1	-0.0786041
Amd2	0.00900003	1	-0.0899093	1	0.00643663	1	1	-0.0248242
Amer1	0.0005297	1	-0.0162733	1	0.210212	1	1	0.0648229
Amfr	0.065721	1	0.0297481	1	0.0517374	1	1	0.0490688
Amigo2	-0.0334739	1	-0.012725	1	-0.0584327	1	1	-0.0348772
Ammecr1	0.0345838	1	0.115268	1	0.0029641	1	1	0.0509388
Ammecr1l	0.0144721	1	0.0245813	1	0.00120524	1	1	0.0134195
Amn1	0.0271414	1	0.0581976	1	0.0340641	1	1	0.039801
Amot	0.0100994	1	0.00516478	1	0.0269851	1	1	0.0140831
Amotl1	-0.0308841	1	-0.0173886	1	-0.0289074	1	1	-0.0257267
Amotl2	-0.000947666	1	-0.00895724	1	-0.056743	1	1	-0.022216
Ampd2	-0.0182848	1	0.0199393	1	0.100456	1	1	0.0340368
Ampd3	0.0283709	1	0.0626131	1	-0.0175343	1	1	0.0244832
Amz2	-0.00672011	1	0.0957251	1	0.0751794	1	1	0.0547281
Anapc1	-0.0412917	1	-0.136186	1	0.0110295	1	1	-0.0554829
Anapc10	0.059554	1	-0.0257549	1	-0.0421793	1	1	-0.00279338
Anapc11	-0.00836199	1	-0.113885	1	-0.0557784	1	1	-0.0593418
Anapc13	-0.0683727	1	0.077312	1	-0.0340706	1	1	-0.00837713
Anapc15	-0.0084356	1	0.0804379	1	-0.0049006	1	1	0.0223672
Anapc16	0.0163847	1	-0.107234	1	0.0538572	1	1	-0.0123306
Anapc2	0.037151	1	-0.0224657	1	-0.0255973	1	1	-0.00363736
Anapc4	-0.0337688	1	-0.0783189	1	0.10475	1	1	-0.00244584
Anapc5	-0.00703876	1	-0.0213287	1	-0.0227823	1	1	-0.0170499
Anapc7	-0.0120707	1	0.0318685	1	-0.0201662	1	1	-0.000122798
Angel2	0.0156869	1	0.0681589	1	-0.00208478	1	1	0.0272537
Angpt2	0.0148965	1	0.0527172	1	0.0542306	1	1	0.0406147
Angptl2	-0.00303035	1	0.143462	1	0.018589	1	1	0.0530068
Angptl4	0.0335117	1	-0.00839696	1	0.209123	1	1	0.0780794
Ank	0.094645	1	-0.030052	1	0.0976925	1	1	0.0540952
Ank3	0.0424413	1	-0.0985659	1	0.217009	1	1	0.0536281
Ankfy1	-0.052021	1	-0.0720043	1	-0.00845028	1	1	-0.0441585
Ankhd1	-0.0469171	1	0.144778	1	-0.0199054	1	1	0.025985
Ankib1	0.000620202	1	0.0662262	1	0.0565616	1	1	0.041136
Ankle2	-0.0177519	1	-0.137699	1	-0.0406635	1	1	-0.0653715
Ankmy1	-0.0005676	1	0.0108724	1	0.0137635	1	1	0.00802275
Ankmy2	-0.0528555	1	-0.0868509	1	-0.028088	1	1	-0.0559315
Ankra2	-0.0364197	1	0.117686	1	-0.0355614	1	1	0.0152351
Ankrd1	0.202386	1	-0.0455467	1	-0.169999	1	1	-0.00438649
Ankrd10	0.0349374	1	0.00876918	1	-0.0726651	1	1	-0.00965283
Ankrd11	-0.0106055	1	0.0305936	1	0.0531837	1	1	0.0243906
Ankrd12	-0.0175004	1	-0.0302278	1	-0.175725	1	1	-0.0744845
Ankrd13a	0.0260029	1	7.79889e-05	1	-0.0102693	1	1	0.00527055
Ankrd13b	-0.00398708	1	-0.0228639	1	-0.0176837	1	1	-0.0148449
Ankrd13c	0.0266128	1	0.0641686	1	0.098178	1	1	0.0629865
Ankrd13d	-0.00644927	1	-0.0159618	1	-0.00872332	1	1	-0.0103781
Ankrd16	-0.00458963	1	-0.031403	1	-0.0335229	1	1	-0.0231719
Ankrd17	-0.122102	1	-0.082948	1	-0.0806389	1	1	-0.0952296
Ankrd24	-0.00532583	1	-0.0183913	1	0.00151541	1	1	-0.00740057
Ankrd26	-0.0487303	1	0.021027	1	-0.0424301	1	1	-0.0233778
Ankrd27	-0.00398428	1	0.37152	1	0.0600665	1	1	0.142534
Ankrd28	0.0655035	1	0.000820743	1	0.0921664	1	1	0.0528302
Ankrd33b	-0.0478136	1	-0.0881464	1	0.00546967	1	1	-0.0434968
Ankrd37	-0.0830758	1	-0.189887	1	-0.0992994	1	1	-0.124088
Ankrd39	0.00263418	1	0.00642969	1	0.00510549	1	1	0.00472312
Ankrd40	-0.0192677	1	0.0333616	1	0.0408345	1	1	0.0183095
Ankrd42	-0.0100154	1	-0.0101639	1	-0.00229857	1	1	-0.00749264
Ankrd44	-0.0138109	1	-0.0138292	1	-0.00180001	1	1	-0.00981337
Ankrd46	0.0165811	1	-0.0452699	1	0.0495719	1	1	0.00696101
Ankrd49	-0.0181633	1	0.0733611	1	0.0162892	1	1	0.023829
Ankrd50	0.012115	1	-0.0110376	1	0.0142616	1	1	0.00511303
Ankrd52	0.0169269	1	0.0326567	1	-0.0165506	1	1	0.011011
Ankrd54	-0.0335573	1	-0.0953076	1	-0.0336465	1	1	-0.0541705
Ankrd9	-0.0326122	1	0.0903069	1	-0.0926825	1	1	-0.0116626
Anks1	-0.0240255	1	0.120194	1	-0.00869594	1	1	0.0291576
Anks3	-0.00542694	1	-0.0507513	1	-0.00275571	1	1	-0.0196447
Ankzf1	-0.00107428	1	-0.0148973	1	-0.000686748	1	1	-0.00555276
Anln	0.0930439	1	-0.041034	1	0.132059	1	1	0.0613563
Ano1	-0.0312973	1	-0.0503973	1	-0.00378575	1	1	-0.0284934
Ano10	0.0567063	1	-0.0384098	1	0.0152992	1	1	0.0111986
Ano4	0.0502318	1	0.0880446	1	0.0963499	0.0196735	0.248771	0.0782088
Ano6	-0.0319201	1	-0.0160411	1	0.000356356	1	1	-0.0158683
Ano8	0.0375143	1	-0.0799566	1	0.0639022	1	1	0.00715328
Ano9	0.0105476	1	-0.00135695	1	0.0102089	1	1	0.00646649
Anp32a	0.231287	1	0.1365	1	-0.119311	1	1	0.0828252
Anp32b	0.0849242	1	0.10951	1	-0.0238013	1	1	0.0568775
Anp32e	0.130853	1	-0.00785668	1	0.00423321	1	1	0.0424098
Antxr2	0.173395	1	0.0382174	1	0.285201	1	1	0.165605
Anxa1	0.112197	1	-0.161856	1	-0.0204784	1	1	-0.0233792
Anxa11	-0.0521045	1	-0.118623	1	0.0136463	1	1	-0.0523606
Anxa2	0.282224	0.479346	-0.0748073	1	0.188121	1	0.961419	0.131846
Anxa3	0.476892	3.65217e-10	0.0877863	1	0.309607	0.0924416	1.06618e-08	0.291429
Anxa4	-0.00939821	1	0.106139	1	0.0368356	1	1	0.0445253
Anxa5	0.318424	0.000184015	0.0217797	1	0.210915	1	0.0085723	0.183706
Anxa6	0.0255756	1	0.256776	1	-0.0564214	1	1	0.0753101
Anxa7	0.0406598	1	-0.0498986	1	0.0386563	1	1	0.00980587
Anxa8	0.283072	2.78179e-10	0.759167	9.95597e-05	0.220092	0.0107354	2.00944e-13	0.420777
Anxa9	-0.00164639	1	0.3665	1	0.00472695	1	1	0.123193
Aox1	0.0196633	1	0.00441279	1	-0.00842602	1	1	0.00521669
Ap1ar	0.0125596	1	0.0949387	1	-0.0571701	1	1	0.0167761
Ap1b1	-0.0291337	1	-0.0041692	1	0.00559487	1	1	-0.00923601
Ap1g1	0.0250697	1	0.069539	1	0.0683809	1	1	0.0543299
Ap1g2	-0.00487451	1	-0.0146553	1	0.00798352	1	1	-0.00384875
Ap1m1	-0.0244161	1	-0.110002	1	-0.0517299	1	1	-0.0620492
Ap1s1	-0.0347957	1	-0.139329	1	-0.0558895	1	1	-0.0766715
Ap1s2	0.00817199	1	-0.0101518	1	-0.0352938	1	1	-0.0124245
Ap1s3	0.013852	1	-0.00540997	1	0.00603689	1	1	0.00482631
Ap2a1	-0.0115349	1	-0.0938899	1	-0.0518539	1	1	-0.0524263
Ap2a2	-0.041056	1	0.00513604	1	-0.0162256	1	1	-0.0173819
Ap2b1	0.0351397	1	0.16438	1	0.0192629	1	1	0.0729277
Ap2m1	0.118276	1	-0.144614	1	0.0507541	1	1	0.00813871
Ap2s1	0.029057	1	-0.186016	1	-0.0271539	1	1	-0.061371
Ap3b1	-0.0142565	1	-0.0752881	1	0.0276658	1	1	-0.0206263
Ap3d1	-0.0551381	1	-0.0350842	1	0.0225231	1	1	-0.0225664
Ap3m1	0.0241371	1	-0.0419246	1	-0.00422932	1	1	-0.00733892
Ap3m2	0.0209379	1	-0.0422082	1	-0.00026371	1	1	-0.00717801
Ap3s1	0.0367284	1	-0.011003	1	-0.0677416	1	1	-0.0140054
Ap3s2	-0.0105508	1	-0.0380489	1	0.0139191	1	1	-0.0115602
Ap4b1	-0.0244575	1	0.0353115	1	-0.0100306	1	1	0.000274474
Ap4e1	0.00105196	1	0.0169795	1	-0.00885676	1	1	0.00305822
Ap4m1	-0.028966	1	-0.0834345	1	-0.0509866	1	1	-0.0544624
Ap4s1	0.0129597	1	-0.136569	1	-0.00144809	1	1	-0.0416859
Ap5m1	-0.00965117	1	0.0601457	1	0.00426238	1	1	0.0182523
Ap5s1	0.00280341	1	-0.0245327	1	-0.020985	1	1	-0.0142381
Ap5z1	-0.00110723	1	-0.00194587	1	-0.00172131	1	1	-0.00159147
Apaf1	-0.0195446	1	0.014098	1	-0.0267104	1	1	-0.010719
Apba3	0.00950419	1	-0.0211341	1	0.0302069	1	1	0.00619233
Apbb1	-0.00578009	1	-0.0697993	1	-0.0342786	1	1	-0.0366193
Apbb1ip	0.0814548	1	-0.0205129	1	-0.00662979	1	1	0.018104
Apbb2	-0.0745698	1	-0.0968525	1	0.00266918	1	1	-0.056251
Apc	0.0483226	1	0.0619143	1	0.0102038	1	1	0.0401469
Apeh	-0.00221709	1	-0.0585421	1	-0.0676142	1	1	-0.0427911
Apex1	-0.0703579	1	-0.0221267	1	-0.0384752	1	1	-0.0436533
Apex2	-0.0185373	1	-0.0451884	1	-0.0385059	1	1	-0.0340772
Aph1a	0.0661403	1	0.0240504	1	0.0186445	1	1	0.0362784
Aph1b	-0.0116201	1	-0.0140839	1	-0.00976188	1	1	-0.0118219
Api5	-0.0453557	1	-0.0788759	1	-0.0285425	1	1	-0.0509247
Apip	-0.0384258	1	0.0384027	1	-0.0390356	1	1	-0.0130196
Aplf	-0.0163745	1	-0.0486903	1	0.00227171	1	1	-0.020931
Apln	0.048455	1	-0.00391782	1	-0.0089742	1	1	0.0118543
Aplp2	0.0889776	1	0.0478796	1	0.12275	1	1	0.0865357
Apmap	0.00530198	1	-0.0274463	1	0.000674543	1	1	-0.00715661
Apobec3	-0.0353623	1	0.0520771	1	-0.046	1	1	-0.00976174
Apobr	0.0535606	1	-0.0325079	1	0.0229875	1	1	0.0146801
Apoe	-0.0947185	1	-0.21604	1	-0.0804107	1	1	-0.13039
Apol10b	0.0631716	1	-0.0109816	1	-0.02201	1	1	0.01006
Apol6	-0.0105945	1	0.0104611	1	-0.0285889	1	1	-0.00957409
Apol7a	0.00805824	1	-0.024601	1	0.000521604	1	1	-0.00534037
Apol8	0.0127676	1	-0.0186196	1	0.0080476	1	1	0.000731868
Apol9a	-0.0443924	1	-0.0801383	1	-0.1876	1	1	-0.104043
Apol9b	-0.0152504	1	-0.176513	1	0.00347793	1	1	-0.0627617
Apoo	0.079228	1	-0.0296496	1	0.0387531	1	1	0.0294439
Apool	0.0628708	1	0.134521	1	-0.0486472	1	1	0.0495817
Apopt1	-0.0492433	1	-0.0161229	1	-0.0646104	1	1	-0.0433255
App	-0.0124481	1	0.191555	1	0.0040941	1	1	0.061067
Appbp2	-0.0735998	1	-0.0556899	1	-0.0142486	1	1	-0.0478461
Appl1	-0.0387289	1	-0.0753035	1	0.036508	1	1	-0.0258414
Appl2	-0.023044	1	-0.040035	1	-0.0158516	1	1	-0.0263102
Aprt	0.233705	0.107028	0.187498	1	0.192052	1	0.613433	0.204418
Aptx	-0.0477299	1	-0.06963	1	0.00461908	1	1	-0.0375802
Aqp11	-0.00625509	1	-0.0138513	1	0.00261687	1	1	-0.00582985
Aqp3	-0.0178374	1	0.12241	1	-0.00669375	1	1	0.0326262
Aqr	-0.0661051	1	-0.0266253	1	0.0814017	1	1	-0.00377622
Araf	-0.0133933	1	-0.117833	1	-0.011684	1	1	-0.0476368
Arap1	-0.00422962	1	-0.00608075	1	0.0070295	1	1	-0.00109363
Arap2	0.0213051	1	-0.0882671	1	0.0482976	1	1	-0.00622147
Arcn1	0.0144145	1	-0.143901	1	-0.0621738	1	1	-0.063887
Areg	-0.0308663	1	-0.0735249	1	-0.0132368	1	1	-0.0392094
Arel1	-0.0273512	1	-0.0390204	1	0.00690337	1	1	-0.0198227
Arf1	0.072148	1	-0.0380455	1	0.0176593	1	1	0.0172539
Arf2	0.0228122	1	-0.0428302	1	-0.00499542	1	1	-0.00833783
Arf3	-0.0270832	1	-0.032047	1	0.0314634	1	1	-0.00922224
Arf4	0.0127837	1	-0.109211	1	-0.0929055	1	1	-0.0631109
Arf5	0.0247996	1	-0.0241103	1	0.0382678	1	1	0.0129857
Arf6	-0.108567	1	-0.166729	1	-0.0116474	1	1	-0.0956477
Arfgap1	-0.0343989	1	-0.112241	1	-0.0261526	1	1	-0.0575974
Arfgap2	0.00969485	1	0.0217079	1	0.0170245	1	1	0.0161424
Arfgap3	-0.00411197	1	0.0300043	1	-0.0152934	1	1	0.00353296
Arfgef1	0.00164479	1	0.0381338	1	0.00169511	1	1	0.0138246
Arfgef2	-0.010895	1	-0.0568242	1	-0.0125397	1	1	-0.026753
Arfip1	-0.0444498	1	0.0810947	1	-0.0221413	1	1	0.00483455
Arfip2	-0.040492	1	0.0742465	1	0.0597427	1	1	0.0311657
Arfrp1	-0.0415755	1	-0.0416989	1	0.023175	1	1	-0.0200331
Arg1	-0.0522297	1	-0.0166552	1	-0.0118367	1	1	-0.0269072
Arg2	-0.035364	1	-0.0819032	1	-0.0132371	1	1	-0.0435014
Arglu1	0.0194808	1	0.200575	1	-0.0362336	1	1	0.0612741
Arhgap1	-0.0127002	1	-0.0274028	1	-0.0331614	1	1	-0.0244215
Arhgap10	0.0411999	1	-0.0939184	1	-0.0529753	1	1	-0.0352313
Arhgap11a	0.0984945	1	-0.0157832	1	0.0597743	1	1	0.0474952
Arhgap12	-0.00956409	1	0.0325732	1	-0.0187606	1	1	0.00141619
Arhgap17	-0.0152803	1	-0.0522786	1	-0.0200852	1	1	-0.0292147
Arhgap18	-0.0221415	1	-0.153952	1	-0.0465896	1	1	-0.0742278
Arhgap19	0.025306	1	-0.0389143	1	0.0119898	1	1	-0.000539525
Arhgap21	0.0416024	1	-0.083106	1	0.0806018	1	1	0.0130327
Arhgap22	-0.09068	1	-0.233951	1	-0.0607791	1	1	-0.12847
Arhgap23	-0.0343494	1	-0.127232	1	-0.0312966	1	1	-0.0642925
Arhgap26	0.00839481	1	-0.0156392	1	-0.0152354	1	1	-0.00749324
Arhgap27	0.00327177	1	0.00876151	1	0.00355408	1	1	0.00519579
Arhgap27os1	-0.000475673	1	0.135201	1	0.0116669	1	1	0.0487976
Arhgap28	-0.0393578	1	0.00049814	1	0.0140478	1	1	-0.00827062
Arhgap29	0.0209548	1	-0.049252	1	0.0799775	1	1	0.0172268
Arhgap31	0.0207883	1	0.00606435	1	0.031245	1	1	0.0193659
Arhgap32	-0.0303766	1	-0.0430373	1	-0.0211766	1	1	-0.0315302
Arhgap35	0.00348167	1	0.015893	1	0.0660216	1	1	0.0284654
Arhgap39	-0.0136137	1	0.0465196	1	0.00285208	1	1	0.0119193
Arhgap42	-0.117432	1	-0.011008	1	-0.0363645	1	1	-0.0549347
Arhgap45	0.00953807	1	-0.061549	1	4.68526e-05	1	1	-0.0173214
Arhgap5	0.123026	1	0.0748916	1	0.134463	1	1	0.110793
Arhgap6	0.0753562	1	-0.0221153	1	0.0930776	1	1	0.0487728
Arhgap8	-0.00451864	1	-0.0182613	1	0.0746225	1	1	0.0172808
Arhgdia	0.0422548	1	-0.243709	1	0.0491496	1	1	-0.0507683
Arhgdib	-0.0683609	1	-0.0688737	1	-0.0467738	1	1	-0.0613362
Arhgdig	0.00125521	1	0.0963487	1	-0.0047813	1	1	0.0309409
Arhgef1	0.12134	1	0.0483753	1	0.125398	1	1	0.0983709
Arhgef10l	-0.0459117	1	-0.0336575	1	0.0185886	1	1	-0.0203268
Arhgef11	0.00786268	1	-0.0355554	1	0.00599998	1	1	-0.00723091
Arhgef12	0.0264122	1	-0.0258933	1	-0.0479829	1	1	-0.0158213
Arhgef15	0.00275279	1	0.00310295	1	-0.00451108	1	1	0.000448222
Arhgef16	0.0233459	1	0.0146057	1	-0.010162	1	1	0.00926319
Arhgef17	-0.0407981	1	-0.0518379	1	-0.0595612	1	1	-0.0507324
Arhgef18	0.00172614	1	-0.0761181	1	-0.00802691	1	1	-0.0274729
Arhgef19	-0.0358529	1	-0.0201144	1	0.0393722	1	1	-0.00553171
Arhgef2	0.0150591	1	-0.0234965	1	0.0620369	1	1	0.0178665
Arhgef25	-0.0212815	1	-0.0503299	1	-0.0254474	1	1	-0.0323529
Arhgef28	-0.0207564	1	-0.0383349	1	0.00541756	1	1	-0.0178913
Arhgef3	-0.0019462	1	0.00406111	1	0.054461	1	1	0.0188586
Arhgef40	-0.0267006	1	0.0214676	1	-0.0016253	1	1	-0.0022861
Arhgef5	0.0384145	1	0.146527	1	0.0516249	1	1	0.0788556
Arhgef7	-8.66264e-05	1	-0.0133449	1	0.0828349	1	1	0.0231345
Arid1a	-0.0219534	1	0.014353	1	0.00170476	1	1	-0.00196521
Arid1b	-0.0876733	1	0.036408	1	-0.0336515	1	1	-0.0283056
Arid2	0.0083004	1	-0.0515753	1	0.0216654	1	1	-0.00720317
Arid4a	-0.0806904	1	-0.120678	1	0.00942852	1	1	-0.0639801
Arid4b	-0.0841328	1	-0.111353	1	-0.0421117	1	1	-0.0791991
Arid5a	-0.0452192	1	-0.14049	1	0.0166566	1	1	-0.0563508
Arid5b	-0.0727282	1	-0.0779753	1	0.0605723	1	1	-0.0300437
Arih1	-0.0317412	1	0.0743212	1	-0.0112895	1	1	0.0104302
Arih2	-0.0282247	1	-0.120684	1	-0.0039106	1	1	-0.0509399
Arl1	0.106607	1	-0.0525864	1	-0.0274115	1	1	0.00886977
Arl10	0.0101495	1	0.0170277	1	-0.0223406	1	1	0.0016122
Arl13b	-0.0356695	1	-0.0319093	1	-0.0380069	1	1	-0.0351952
Arl14ep	0.00795031	1	-0.150286	1	-0.0259226	1	1	-0.056086
Arl15	-0.00936338	1	-0.0176985	1	0.0243852	1	1	-0.000892236
Arl16	0.00443651	1	0.0444127	1	-0.0357358	1	1	0.00437115
Arl2	-0.08127	1	-0.035047	1	-0.0394039	1	1	-0.051907
Arl2bp	0.00364696	1	0.00147029	1	0.0530648	1	1	0.019394
Arl3	-0.166529	0.138803	0.113224	1	-0.210763	0.509792	0.506335	-0.0880228
Arl4a	-0.199236	0.00203107	-0.143034	1	-0.176203	1	0.0536491	-0.172824
Arl4c	0.0118954	1	0.203234	1	0.12652	1	1	0.113883
Arl5a	0.00442282	1	0.0340562	1	-0.0437257	1	1	-0.00174886
Arl5b	-0.0359933	1	-0.0161571	1	0.0438234	1	1	-0.00277568
Arl6	-0.0153988	1	-0.055286	1	0.029791	1	1	-0.0136313
Arl6ip1	0.133186	1	0.13074	1	0.219869	1	1	0.161265
Arl6ip4	0.0275487	1	-0.00564082	1	-0.0380747	1	1	-0.00538894
Arl6ip5	-0.0785547	1	0.047259	1	0.144996	1	1	0.0379001
Arl6ip6	0.0187127	1	-0.171914	1	-0.0535954	1	1	-0.0689321
Arl8a	-0.0242343	1	-0.168564	1	-0.0606477	1	1	-0.0844821
Arl8b	-0.0354275	1	-0.190121	1	0.0191499	1	1	-0.0687994
Armc1	0.00585915	1	-0.0803077	1	-0.072469	1	1	-0.0489725
Armc10	-0.0543122	1	-0.030659	1	-0.0741423	1	1	-0.0530378
Armc3	-0.0530378	1	-0.0965883	1	0.00337383	1	1	-0.0487508
Armc5	-0.0157976	1	-0.0314383	1	-0.00902656	1	1	-0.0187542
Armc6	0.00252843	1	-0.0306547	1	0.0345295	1	1	0.00213439
Armc8	-0.0300677	1	-0.0224512	1	-0.0181955	1	1	-0.0235715
Armc9	-0.00172492	1	-0.0352838	1	-0.028626	1	1	-0.0218782
Armcx5	-0.0209603	1	-0.0036943	1	-0.0126793	1	1	-0.0124446
Armt1	0.00704742	1	-0.0520339	1	-0.0247147	1	1	-0.0232337
Arnt	-0.0175303	1	-0.0178649	1	-0.0491002	1	1	-0.0281651
Arntl	0.0122306	1	-0.0222664	1	0.0184983	1	1	0.00282084
Arntl2	0.0158154	1	-0.0824697	1	0.0689655	1	1	0.000770367
Arpc1a	-0.0612773	1	0.109303	1	-0.00823241	1	1	0.0132644
Arpc1b	-0.0588853	1	0.00635706	1	-0.0292724	1	1	-0.0272669
Arpc2	0.161691	1	-0.0528408	1	0.083308	1	1	0.0640528
Arpc3	-0.0431654	1	-0.0836324	1	0.0117688	1	1	-0.038343
Arpc4	0.0368355	1	0.123841	1	-0.0455337	1	1	0.0383809
Arpc5	0.0849147	1	0.242129	1	0.0532184	1	1	0.126754
Arpc5l	0.0340616	1	-0.0266617	1	-0.0736847	1	1	-0.0220949
Arpin	0.00299105	1	-0.0412148	1	-0.0111805	1	1	-0.0164681
Arpp19	0.103719	1	0.0294046	1	-0.0253193	1	1	0.0359346
Arrb2	-0.00797055	1	-0.0482836	1	0.038782	1	1	-0.00582406
Arrdc1	-0.00338646	1	0.00904003	1	-0.0153282	1	1	-0.00322486
Arrdc2	-0.0137488	1	-0.00493885	1	-0.0036861	1	1	-0.00745791
Arrdc3	0.0488114	1	-0.0178684	1	-0.0562536	1	1	-0.00843685
Arrdc4	-0.051921	1	-0.0548103	1	-0.0489409	1	1	-0.0518907
Arsa	-0.0197454	1	-0.127198	1	0.032796	1	1	-0.0380491
Arsb	0.0142395	1	-0.0178682	1	-0.00884814	1	1	-0.00415895
Arsk	-0.0200494	1	-0.000301695	1	-0.0218778	1	1	-0.0140763
Art2b	0.0430162	1	0.0822734	1	0.0113984	1	1	0.0455627
Artn	-0.0214283	1	-0.0111666	1	-0.0252448	1	1	-0.0192799
Arv1	0.00648866	1	-0.0120043	1	0.00431659	1	1	-0.000399693
Arvcf	0.000997142	1	-0.0133828	1	-0.0126793	1	1	-0.00835498
As3mt	-0.0225498	1	0.0312111	1	0.00723573	1	1	0.00529901
Asah1	0.0751718	1	0.0695655	1	0.161085	1	1	0.101941
Asah2	-0.00329968	1	0.00831131	1	0.00811667	1	1	0.0043761
Asap1	-0.114672	1	-0.0642297	1	-0.0441965	1	1	-0.0743659
Asap2	-0.0845162	1	0.0164425	1	-0.133207	1	1	-0.0670936
Asap3	-0.0016432	1	-0.0276932	1	-0.00228336	1	1	-0.0105399
Asb1	-0.00196329	1	-0.0052182	1	-0.0124149	1	1	-0.00653215
Asb13	0.0504576	1	0.00457701	1	-0.0103	1	1	0.0149115
Asb3	-0.0327552	1	0.0285224	1	-0.0555553	1	1	-0.0199294
Asb6	-0.0245505	1	-0.0486091	1	-0.0142286	1	1	-0.0291294
Asb7	-0.00293451	1	0.0130075	1	2.09197e-05	1	1	0.00336464
Asb8	-0.0159705	1	-0.0230984	1	-0.000503955	1	1	-0.0131909
Ascc1	-0.0227738	1	-0.0491787	1	-0.069287	1	1	-0.0470798
Ascc2	0.00762238	1	0.00733058	1	-0.0120474	1	1	0.000968506
Ascc3	-0.057126	1	-0.0460433	1	0.00976019	1	1	-0.0311364
Asf1a	-0.0908702	1	-0.145284	1	-0.0674605	1	1	-0.101205
Asf1b	0.0216673	1	0.0442433	1	-0.00548707	1	1	0.0201412
Ash1l	-0.125965	1	-0.0580726	1	-0.0335579	1	1	-0.0725319
Ash2l	0.0149914	1	-0.00941051	1	0.0318126	1	1	0.0124645
Asl	0.0176577	1	-0.0493851	1	0.00628375	1	1	-0.00848119
Asna1	0.0232197	1	-0.0149135	1	-0.0204036	1	1	-0.00403247
Asns	0.0883591	1	-0.0784997	1	0.0352157	1	1	0.015025
Asnsd1	-0.0254395	1	0.137156	1	0.0230311	1	1	0.0449159
Asph	-0.0418269	1	-0.0163658	1	-0.145524	1	1	-0.0679057
Aspm	0.0814956	1	-0.0149286	1	0.138319	1	1	0.0682953
Aspscr1	-0.0424313	1	-0.186643	1	-0.0579583	1	1	-0.0956776
Asrgl1	0.0089123	1	-0.0395249	1	-0.0153041	1	1	-0.0153056
Ass1	0.279999	0.0478788	0.227224	1	0.108575	1	0.414491	0.205266
Aste1	-0.00229348	1	-0.0182092	1	-0.0133275	1	1	-0.0112767
Asxl1	-0.0581212	1	-0.0306128	1	-0.01286	1	1	-0.0338647
Asxl2	-0.0503377	1	-0.0504419	1	-0.0415164	1	1	-0.047432
Atad1	0.018018	1	-0.0177743	1	-0.0710244	1	1	-0.0235936
Atad2	-0.0395215	1	-0.198294	1	-0.118527	1	1	-0.118781
Atad2b	0.0216345	1	0.013074	1	-0.00935908	1	1	0.0084498
Atad3a	-0.0293246	1	-0.062555	1	-0.0658518	1	1	-0.0525771
Atad5	0.0151873	1	-0.00216229	1	-0.0306463	1	1	-0.00587376
Atat1	-0.0230735	1	0.0212958	1	-0.0326816	1	1	-0.0114864
Ate1	-0.00142405	1	-0.0194745	1	-0.023239	1	1	-0.0147125
Atf1	0.0163965	1	-0.0612803	1	-0.0156041	1	1	-0.0201627
Atf2	-0.0391491	1	-0.054737	1	0.0295517	1	1	-0.0214448
Atf3	0.0756907	1	-0.113494	1	-0.0925345	1	1	-0.0434458
Atf4	-0.0678476	1	-0.272749	1	-0.0209501	1	1	-0.120515
Atf5	0.0875827	1	0.0998383	1	-0.0396125	1	1	0.0492695
Atf6	0.0770065	1	0.14912	1	0.108586	1	1	0.111571
Atf6b	-0.0461874	1	-0.130517	1	-0.00762992	1	1	-0.0614448
Atf7	-0.0193054	1	0.0111532	1	-0.0209459	1	1	-0.00969937
Atf7ip	-0.0452157	1	0.0599543	1	-0.070838	1	1	-0.0186998
Atg10	-0.00605907	1	-0.064037	1	-0.0379586	1	1	-0.0360182
Atg101	-0.0405535	1	-0.109096	1	-0.0537412	1	1	-0.0677968
Atg12	0.0417052	1	0.0515719	1	0.0407688	1	1	0.044682
Atg13	0.000483105	1	-0.019134	1	-0.0144243	1	1	-0.0110251
Atg14	-0.0171018	1	0.0184858	1	-0.031109	1	1	-0.00990834
Atg16l1	0.00608752	1	-0.0240382	1	0.0451281	1	1	0.00905912
Atg16l2	0.0362133	1	-0.0358398	1	-0.0326508	1	1	-0.0107591
Atg2a	-0.0111537	1	-0.0212156	1	-0.0108124	1	1	-0.0143939
Atg2b	-0.00913337	1	0.0146171	1	-0.0220391	1	1	-0.00551844
Atg3	0.077494	1	-0.23127	1	-0.012066	1	1	-0.0552805
Atg4a	-0.0126209	1	-0.0305636	1	0.00412155	1	1	-0.013021
Atg4b	0.0127442	1	-0.07426	1	0.0192756	1	1	-0.0140801
Atg4c	-0.0189981	1	-0.031426	1	0.00266141	1	1	-0.0159209
Atg4d	-0.0231897	1	0.0454654	1	-0.015949	1	1	0.00210889
Atg5	-0.0702033	1	-0.0132565	1	-0.0203657	1	1	-0.0346085
Atg7	-0.0269755	1	-0.033085	1	-0.0052583	1	1	-0.0217729
Atg9a	-0.00771199	1	-0.00754955	1	0.00227554	1	1	-0.00432866
Atg9b	0.0838439	0.206127	0.0939764	1	0.115513	0.00185795	0.0152488	0.0977776
Atic	0.0703026	1	0.16404	1	0.0799816	1	1	0.104775
Atl1	-0.0095843	1	-0.00519962	1	-0.0085063	1	1	-0.00776341
Atl2	-0.0325542	1	0.0800328	1	0.0441206	1	1	0.0305331
Atl3	0.0490588	1	-0.0293185	1	0.0438173	1	1	0.0211858
Atm	-0.0642413	1	-0.0359127	1	-0.0733128	1	1	-0.0578223
Atmin	0.0081193	1	-0.0208761	1	0.0251428	1	1	0.00412865
Atn1	-0.0375129	1	-0.0190111	1	0.0673564	1	1	0.00361082
Atox1	0.0500533	1	-0.184021	1	0.203475	0.923337	0.99992	0.0231691
Atp10a	0.00604473	1	-0.0195793	1	0.00587254	1	1	-0.00255401
Atp11a	0.0581358	1	0.0975397	1	0.0800627	1	1	0.0785794
Atp11b	0.0973083	1	0.141159	1	0.0608631	1	1	0.0997767
Atp11c	0.00645245	1	-0.00470664	1	0.0249738	1	1	0.00890652
Atp13a1	0.0534208	1	-0.0259856	1	0.0926279	1	1	0.040021
Atp13a2	-0.00444476	1	0.0305534	1	-0.00954547	1	1	0.00552106
Atp13a3	0.0406227	1	0.149876	1	0.0204109	1	1	0.0703033
Atp1a1	-0.00102763	1	-0.0733619	1	-0.0721212	1	1	-0.0488369
Atp1b1	-0.0305317	1	0.00204965	1	-0.031704	1	1	-0.020062
Atp1b3	0.000670434	1	0.0229135	1	-0.000764069	1	1	0.00760663
Atp23	-0.0181017	1	-0.0322031	1	0.0381739	1	1	-0.00404366
Atp2a2	-0.0762646	1	-0.0987544	1	-0.0191128	1	1	-0.0647106
Atp2b1	-0.0677408	1	0.0715805	1	0.169283	1	1	0.0577076
Atp2c1	0.00301153	1	0.00795145	1	0.0182869	1	1	0.00974997
Atp2c2	-0.0165832	1	0.0230339	1	0.0398207	1	1	0.0154238
Atp5a1	0.108032	1	-0.0923975	1	0.0388959	1	1	0.0181769
Atp5b	0.0696209	1	-0.0400379	1	0.144391	1	1	0.0579913
Atp5c1	0.0220566	1	-0.181005	1	0.0804114	1	1	-0.026179
Atp5d	0.0827805	1	-0.0292319	1	0.051521	1	1	0.0350232
Atp5e	-0.032871	1	0.0602224	1	-0.10581	1	1	-0.026153
Atp5f1	0.105594	1	0.00989007	1	0.0371784	1	1	0.0508874
Atp5g1	0.0309683	1	0.159714	1	-0.0764122	1	1	0.0380899
Atp5g2	0.159675	0.321833	0.286226	1	0.0332931	1	0.893532	0.159732
Atp5g3	0.0327343	1	-0.0701776	1	0.00859698	1	1	-0.00961544
Atp5h	0.021707	1	-0.067324	1	-0.00984099	1	1	-0.018486
Atp5j	0.0669379	1	0.124782	1	0.0583575	1	1	0.0833593
Atp5j2	-0.000943338	1	-0.0212215	1	-0.114905	1	1	-0.04569
Atp5k	-0.0130481	1	-0.0356942	1	-0.167645	1	1	-0.0721289
Atp5l	-0.0145033	1	0.31169	1	-0.0669189	1	1	0.0767559
Atp5o.1	0.114879	1	0.0535033	1	0.0506423	1	1	0.0730081
Atp5s	-0.00328127	1	0.0202442	1	0.0126129	1	1	0.00985861
Atp6ap1	-0.0352981	1	-0.0811399	1	-0.0434288	1	1	-0.0532889
Atp6ap2	-0.0574097	1	-0.08989	1	-0.0179122	1	1	-0.0550706
Atp6v0a1	0.0244039	1	-0.0376419	1	0.00949095	1	1	-0.00124901
Atp6v0a2	-0.0147123	1	-0.0447238	1	0.0269228	1	1	-0.0108378
Atp6v0b	-0.0502485	1	-0.19295	1	0.114308	1	1	-0.0429638
Atp6v0c	0.0115847	1	-0.0452739	1	-0.0156202	1	1	-0.0164364
Atp6v0d1	0.00525723	1	0.238031	1	0.0439781	1	1	0.0957554
Atp6v0e	-0.131808	1	-0.0886366	1	-0.222607	0.242135	0.829068	-0.147684
Atp6v1a	0.0126224	1	0.0111241	1	0.0249926	1	1	0.0162463
Atp6v1b2	0.0108852	1	-0.139303	1	0.0600222	1	1	-0.0227985
Atp6v1c1	-0.026222	1	-0.01421	1	0.0697209	1	1	0.00976297
Atp6v1d	0.01008	1	-0.216041	1	0.000586649	1	1	-0.068458
Atp6v1e1	0.00953144	1	-0.0714168	1	-0.0287945	1	1	-0.0302266
Atp6v1f	-0.0909824	1	-0.142091	1	-0.0530781	1	1	-0.095384
Atp6v1g1	0.0578903	1	-0.214812	1	0.050835	1	1	-0.0353621
Atp6v1h	0.0249837	1	-0.0560308	1	0.00969144	1	1	-0.00711856
Atp7a	0.00551502	1	0.0146037	1	-0.013763	1	1	0.00211857
Atp8a1	0.00627579	1	-0.00359737	1	-0.0170664	1	1	-0.00479601
Atp8b2	0.00177182	1	-0.0549945	1	0.00817815	1	1	-0.0150149
Atp9a	-0.036071	1	0.0369239	1	-0.0448192	1	1	-0.0146554
Atp9b	-0.0369871	1	-0.020804	1	0.0355018	1	1	-0.00742979
Atpaf1	0.0122984	1	0.00489993	1	-0.0106638	1	1	0.00217818
Atpaf2	0.00185668	1	-0.104479	1	-0.0268491	1	1	-0.0431572
Atpif1	0.0115118	1	0.145315	1	-0.0179804	1	1	0.0462822
Atr	0.0117704	1	0.00648579	1	-0.014884	1	1	0.00112407
Atraid	-0.122563	1	-0.141074	1	0.0532285	1	1	-0.070136
Atrip	0.00180989	1	-0.0308287	1	-0.0235125	1	1	-0.0175105
Atrn	-0.0338816	1	0.0345766	1	0.00572973	1	1	0.00214158
Atrnl1	0.0128317	1	0.0139983	1	0.0161528	1	1	0.0143276
Atrx	-0.0611235	1	-0.0805792	1	-0.0149157	1	1	-0.0522062
Atxn1	-0.0171649	1	0.246463	1	0.0182531	1	1	0.0825169
Atxn10	0.0338942	1	0.0944907	1	-0.0452167	1	1	0.0277228
Atxn1l	0.0120821	1	-0.0609753	1	0.111155	1	1	0.020754
Atxn2	-0.115145	0.899833	-0.0583742	1	-0.00881356	1	0.999819	-0.0607776
Atxn2l	-0.0580792	1	-0.0297169	1	-0.0692834	1	1	-0.0523598
Atxn3	0.00784819	1	-0.110804	1	0.0160358	1	1	-0.0289733
Atxn7	-0.0375226	1	-0.037783	1	-0.0208978	1	1	-0.0320678
Atxn7l1	-0.00879922	1	-0.0672945	1	-0.00275429	1	1	-0.0262827
Atxn7l2	-0.00762176	1	-0.0546273	1	-0.0430294	1	1	-0.0350928
Atxn7l3	-0.0617486	1	-0.108495	1	0.0617538	1	1	-0.0361634
Atxn7l3b	-0.126128	0.192065	-0.0128269	1	-0.0552524	1	0.77038	-0.0647356
AU019823	-0.0253267	1	0.224797	1	-0.0105621	1	1	0.0629693
AU020206	0.0446734	1	-0.0292262	1	0.00733581	1	1	0.00759432
AU022252	0.0213663	1	-0.0326687	1	0.0791281	1	1	0.0226086
AU040320	-0.00176594	1	-0.0359812	1	0.0181644	1	1	-0.00652759
AU041133	-0.00474594	1	-0.0291837	1	-0.0237212	1	1	-0.0192169
Auh	-0.0293309	1	0.0103471	1	0.0540904	1	1	0.0117022
Aunip	0.0106654	1	-0.0033531	1	-0.00692953	1	1	0.000127596
Aup1	0.0512652	1	0.0291913	1	-0.00924233	1	1	0.0237381
Aurka	-0.00286901	1	-0.0358689	1	0.0598075	1	1	0.00702319
Aurkaip1	0.0224691	1	0.0327101	1	0.0791309	1	1	0.04477
Aurkb	-0.013196	1	0.0991178	1	0.0836276	1	1	0.0565164
AV099323	0.0117199	1	-0.0142787	1	0.00752456	1	1	0.00165528
Aven	0.00745202	1	0.0900124	1	-0.015988	1	1	0.0271588
Avl9	0.000712529	1	0.0390867	1	-0.0710118	1	1	-0.0104042
Avpi1	-0.0566164	1	0.141924	1	0.0553649	1	1	0.0468909
AW112010	0.0537035	1	-0.424123	1	-0.259169	1	1	-0.209863
AW146154	-0.00380243	1	0.0444444	1	-0.0013219	1	1	0.0131067
AW209491	-0.000904483	1	0.107073	1	-0.0183883	1	1	0.0292601
AW549877	-0.0318508	1	0.0542293	1	0.0931249	1	1	0.0385012
AW554918	0.0012413	1	0.0827973	1	-0.0155882	1	1	0.0228168
Axin1	-0.109916	0.000238305	-0.0997218	1	-0.0199714	1	0.0105179	-0.0765364
Axl	0.0398517	1	-0.214967	1	-0.0143878	1	1	-0.0631678
AY036118	0.0611082	1	0.585748	1	-0.259109	1	1	0.129249
Azi2	0.00937821	1	0.0166936	1	0.034252	1	1	0.0201079
Azin1	-0.0402157	1	-0.0369723	1	-0.0106345	1	1	-0.0292742
Azin2	0.015199	1	-0.0780158	1	0.124466	1	1	0.0205496
B230118H07Rik	0.0310414	1	0.0706336	1	-0.0279034	1	1	0.0245905
B230208H11Rik	-0.00175858	1	-0.000965787	1	-0.0114767	1	1	-0.00473368
B230219D22Rik	-0.0575969	1	-0.144279	1	-0.0388266	1	1	-0.080234
B230307C23Rik	0.0490225	1	0.0432709	1	-0.0265766	1	1	0.0219056
B230354K17Rik	-0.0268733	1	-0.0254147	1	-0.00161135	1	1	-0.0179664
B230369F24Rik	-0.00178451	1	-0.00359024	1	-0.00394366	1	1	-0.00310614
B2m	0.206906	1	0.1834	1	0.035545	1	1	0.14195
B3galnt2	0.0200418	1	0.0309877	1	0.0104298	1	1	0.0204864
B3galt6	-0.000224261	1	-0.0495485	1	0.00209093	1	1	-0.0158939
B3gat3	-0.0318368	1	-0.097992	1	0.0167305	1	1	-0.0376995
B3glct	-0.0438738	1	-0.0439828	1	-0.0186182	1	1	-0.0354916
B3gnt2	-0.0191176	1	0.0245052	1	-0.0395099	1	1	-0.0113741
B3gnt3	0.0345955	1	-0.03139	1	0.0122058	1	1	0.00513711
B4galnt1	0.0845487	1	-0.22966	1	-0.0548047	1	1	-0.0666388
B4galnt4	-0.0134114	1	-0.00843467	1	0.0337143	1	1	0.00395607
B4galt1	0.0237381	1	-0.199719	1	0.0686267	1	1	-0.0357846
B4galt2	-0.00423311	1	0.0207463	1	-0.0382024	1	1	-0.00722972
B4galt3	0.0106857	1	-0.0391989	1	0.0233518	1	1	-0.00172045
B4galt4	0.0123866	1	-0.0229828	1	-0.00598739	1	1	-0.00552787
B4galt5	-0.0332129	1	-0.0289276	1	-0.0280463	1	1	-0.0300623
B4galt6	0.0179529	1	-0.000775242	1	0.0154301	1	1	0.0108692
B4galt7	3.57943e-05	1	-0.0497396	1	-0.00222582	1	1	-0.0173099
B4gat1	0.0515008	1	-0.00795005	1	0.0114533	1	1	0.0183347
B630019K06Rik	-0.0120806	1	-0.00471473	1	-0.00618146	1	1	-0.00765893
B930036N10Rik	-0.0713529	1	-0.0800506	1	-0.0106509	1	1	-0.0540181
B9d1	0.00619515	1	-0.123291	1	-0.0292588	1	1	-0.0487848
B9d2	-0.0401338	1	-0.0358508	1	-0.0182064	1	1	-0.031397
Babam1	0.0605595	1	-0.0496619	1	0.043898	1	1	0.0182652
Babam2	-0.0177763	1	-0.0458062	1	-0.0147534	1	1	-0.026112
Bace1	-0.0187661	1	-0.135877	1	-0.0302025	1	1	-0.0616152
Bach1	-0.0349366	1	-0.0515136	1	-0.0308335	1	1	-0.0390946
Bad	-0.0782002	1	-0.0542327	1	-0.0631144	1	1	-0.0651824
Bag1	0.00387369	1	0.0988879	1	-0.0151639	1	1	0.0291992
Bag2	0.0064532	1	-0.0151255	1	-0.0425461	1	1	-0.0170728
Bag3	-0.123012	0.527007	-0.166684	1	-0.0274607	1	0.972691	-0.105719
Bag4	0.00328643	1	-0.00978889	1	0.000644277	1	1	-0.00195273
Bag5	-0.0257297	1	-0.0672762	1	-0.0533695	1	1	-0.0487918
Bag6	-0.0537727	1	-0.0869709	1	0.030499	1	1	-0.0367482
Bahd1	0.0226841	1	-0.0259687	1	-0.0131971	1	1	-0.0054939
Baiap2	-0.157079	1	-0.283565	1	-0.0948719	1	1	-0.178505
Baiap2l1	0.0142701	1	0.018446	1	-0.00443011	1	1	0.00942866
Bak1	-0.0232515	1	-0.111007	1	-0.107841	1	1	-0.0806997
Banf1	0.00445073	1	0.14602	1	-0.0814185	1	1	0.0230175
Banp	-0.00217681	1	-0.148424	1	-0.0254167	1	1	-0.0586725
Bap1	-0.0280759	1	0.00765001	1	-0.0143596	1	1	-0.0115952
Bard1	0.024291	1	-0.0215134	1	-0.0124023	1	1	-0.00320824
Basp1	-0.0775862	1	-0.12009	1	0.0973955	1	1	-0.033427
Batf2	0.0192384	1	-0.0398442	1	0.033227	1	1	0.00420704
Batf3	0.00640634	1	-0.0174121	1	-0.0103379	1	1	-0.00711454
Bax	-0.00289137	1	-0.158279	1	-0.120148	1	1	-0.0937726
Baz1a	-0.0969526	1	-0.205509	1	-0.00712988	1	1	-0.103197
Baz1b	-0.101204	1	-0.139824	1	-0.0787173	1	1	-0.106582
Baz2a	-0.0354153	1	-0.00841885	1	0.0025194	1	1	-0.0137716
Baz2b	-0.0727248	1	-0.0408897	1	0.00103748	1	1	-0.0375257
Bbc3	-0.0276509	1	-0.155952	1	-0.0454749	1	1	-0.0763591
Bbip1	-0.0230334	1	-0.140575	1	-0.0341821	1	1	-0.0659302
Bbs12	-0.0037116	1	0.0136559	1	-0.00179206	1	1	0.00271743
Bbs2	-0.0170311	1	0.00280317	1	0.000744151	1	1	-0.00449458
Bbs4	-0.00178301	1	-0.0386745	1	-0.0303616	1	1	-0.0236064
Bbs5	-0.0183793	1	-0.0511872	1	0.0506746	1	1	-0.00629729
Bbs7	-0.0156432	1	0.02744	1	-0.0127383	1	1	-0.000313838
Bbs9	-0.0175816	1	-0.0271931	1	0.0256854	1	1	-0.00636311
Bbx	-0.15453	0.597143	-0.144419	1	-0.00490765	1	0.984402	-0.101285
BC002059	0.00444533	1	-0.0592532	1	-0.0112298	1	1	-0.0220126
BC003331	0.0395829	1	0.0442932	1	0.0221596	1	1	0.0353452
BC003965	-0.0317771	1	-0.0120326	1	-0.122154	1	1	-0.0553214
BC004004	-0.0367611	1	-0.0744748	1	-0.010132	1	1	-0.040456
BC005537	0.00424336	1	-0.123956	1	0.057038	1	1	-0.0208916
BC005561	-0.0873281	1	0.10544	1	-0.0750179	1	1	-0.0189689
BC005624	-0.0481852	1	0.0152012	1	-0.0637731	1	1	-0.0322524
BC017643	-0.0244952	1	-0.113791	1	-0.0313069	1	1	-0.0565311
BC022687	0.00481703	1	0.00564161	1	0.0210722	1	1	0.0105103
BC024978	-0.00940299	1	0.0147362	1	-0.020182	1	1	-0.00494959
BC029722	0.00567781	1	-0.0149325	1	-0.0104726	1	1	-0.00657575
BC030867	-0.0127134	1	0.0285284	1	0.00500487	1	1	0.00693995
BC031181	0.00654478	1	0.0813599	1	0.0278213	1	1	0.0385753
BC037034	-0.0247793	1	-0.0328532	1	-0.0209366	1	1	-0.0261897
BC048403	-0.00249064	1	-0.0325636	1	-0.00532052	1	1	-0.0134582
BC052040	-0.00352656	1	-0.00792371	1	-0.015747	1	1	-0.00906577
BC055324	-0.0102185	1	0.0540782	1	-0.000922112	1	1	0.0143125
BC100530	-0.0319173	1	-0.0585674	1	-0.00228218	1	1	-0.0309223
Bcam	-0.000255897	1	-0.0206999	1	0.107385	1	1	0.0288098
Bcap29	-0.0187317	1	0.193697	1	0.040386	1	1	0.0717838
Bcap31	-0.0244751	1	0.196207	1	-0.0188395	1	1	0.0509643
Bcar1	-0.0317422	1	-0.119241	1	-0.0579073	1	1	-0.06963
Bcar3	0.0201786	1	-0.0454605	1	0.0110942	1	1	-0.0047292
Bcas2	0.0401547	1	0.158055	1	-0.0677205	1	1	0.0434963
Bcas3	-0.0274618	1	-0.014114	1	0.0259995	1	1	-0.0051921
Bcat2	0.0269315	1	-0.008453	1	0.00269114	1	1	0.00705655
Bccip	0.0234333	1	0.143277	1	-0.0557472	1	1	0.0369878
Bcdin3d	0.008383	1	0.000702811	1	-0.00117269	1	1	0.0026377
Bckdha	-0.0159345	1	-0.0850114	1	-0.0169241	1	1	-0.03929
Bckdhb	-0.0185557	1	0.0148184	1	-0.0173078	1	1	-0.00701504
Bckdk	0.0193231	1	0.0562951	1	0.0213508	1	1	0.032323
Bcl10	-0.0826812	1	-0.136718	1	-0.0606064	1	1	-0.093335
Bcl11a	-0.00177153	1	0.0978182	1	-0.0111947	1	1	0.028284
Bcl2	-0.0330334	1	0.123916	1	-0.0562225	1	1	0.0115533
Bcl2l1	-0.0104309	1	-0.0827568	1	-0.0477367	1	1	-0.0469748
Bcl2l11	-0.0732418	1	0.109232	1	-0.0671973	1	1	-0.0104023
Bcl2l12	0.00792315	1	-0.022946	1	-0.0363427	1	1	-0.0171219
Bcl2l13	-0.0349147	1	-0.000417329	1	0.00752576	1	1	-0.00926875
Bcl2l2	-0.00480971	1	-0.0421259	1	0.00393763	1	1	-0.0143327
Bcl3	-0.0195145	1	-0.192968	1	0.0592471	1	1	-0.0510785
Bcl6	-0.0424928	1	0.0178025	1	0.00302576	1	1	-0.00722151
Bcl7a	-0.0133942	1	0.0660949	1	0.00870893	1	1	0.0204699
Bcl7b	-0.0763837	1	-0.185492	1	-0.0945274	1	1	-0.118801
Bcl7c	0.0309249	1	-0.100675	1	-0.0993649	1	1	-0.0563717
Bcl9	-0.0511196	1	-0.147296	1	0.0369031	1	1	-0.0538376
Bcl9l	-0.0887429	1	0.0541321	1	0.0258567	1	1	-0.00291803
Bclaf1	-0.0834723	1	-0.10906	1	-0.00415256	1	1	-0.0655615
Bclaf3	-0.0375993	1	-0.0148395	1	-0.0469687	1	1	-0.0331358
Bcor	-0.0206139	1	0.00441246	1	-0.019913	1	1	-0.0120381
Bcorl1	-0.039359	1	-0.0217978	1	0.00704284	1	1	-0.018038
Bcr	-0.0620828	1	-0.0778978	1	0.0665403	1	1	-0.0244801
Bcs1l	-0.0215513	1	0.000655322	1	-0.0109922	1	1	-0.0106294
Bdkrb2	0.00190872	1	-0.0549186	1	-0.0374442	1	1	-0.0301514
Bdnf	-0.121603	1	-0.213719	1	-0.219514	0.0900492	0.567777	-0.184945
Bdp1	-0.0118536	1	0.0554455	1	0.063821	1	1	0.0358043
Becn1	-0.0356293	1	-0.0399273	1	-0.033808	1	1	-0.0364548
Bend3	-0.0127605	1	-0.00420508	1	-0.0162416	1	1	-0.0110691
Bend4	-0.0147241	1	0.0297165	1	-0.030253	1	1	-0.00508685
Bend5	-0.0273956	1	-0.0790307	1	0.00936488	1	1	-0.0323538
Bend6	-0.0259327	1	-0.0164955	1	-0.014893	1	1	-0.0191071
Bet1	0.00321244	1	-0.0989028	1	-0.0216614	1	1	-0.0391173
Bet1l	-0.0185291	1	-0.000870524	1	0.0539218	1	1	0.0115074
Bex3	0.0135237	1	0.319834	1	-0.11281	1	1	0.0735159
Bfar	-0.0147288	1	0.0436641	1	-0.0117942	1	1	0.00571372
Bgn	0.0199642	1	-0.183039	1	-0.00364932	1	1	-0.0555747
Bhlhe40	-0.0731871	1	-0.24866	1	0.09126	1	1	-0.0768625
Bhlhe41	0.0372773	1	0.0671459	1	0.0390425	1	1	0.0478219
Bicd1	-0.000795997	1	-0.0360234	1	-0.0138841	1	1	-0.0169011
Bicd2	0.00949493	1	-0.0505309	1	0.0278484	1	1	-0.00439583
Bicra	-0.0253577	1	-0.0232574	1	-0.0141234	1	1	-0.0209128
Bicral	-0.0364866	1	-0.0131412	1	-0.0160484	1	1	-0.0218921
Bid	-0.00161095	1	-0.0510053	1	-0.0481127	1	1	-0.0335763
Bin1	0.138283	1	0.127485	1	0.0189099	1	1	0.0948924
Bin3	-0.00212751	1	-0.0581865	1	-0.0102987	1	1	-0.0235376
Birc2	-0.00231083	1	0.0157921	1	-0.0637763	1	1	-0.016765
Birc3	-0.0468163	1	-0.0960389	1	0.0655067	1	1	-0.0257828
Birc5	0.156488	1	-0.348179	1	0.15092	1	1	-0.0135904
Birc6	-0.062188	1	-0.0782073	1	0.0262908	1	1	-0.0380349
Bivm	-0.00286971	1	-0.0412583	1	0.00212329	1	1	-0.0140016
Blcap	-0.0455108	1	0.0238701	1	0.0438494	1	1	0.00740291
Blm	-0.011052	1	-0.00509402	1	-0.0302939	1	1	-0.01548
Blmh	-0.0302434	1	-0.0683421	1	0.111097	1	1	0.00417036
Bloc1s1	-0.0891905	1	-0.236229	1	-0.0611484	1	1	-0.128856
Bloc1s2	0.0119755	1	-0.118584	1	-0.0637657	1	1	-0.0567913
Bloc1s3	-0.0161987	1	-0.0365663	1	0.00746767	1	1	-0.0150991
Bloc1s4	-0.0293444	1	-0.131267	1	-0.0760354	1	1	-0.0788821
Bloc1s5	-0.000288137	1	0.0648357	1	-0.0224259	1	1	0.0140406
Bloc1s6	-0.0244185	1	-0.174328	1	-0.0201084	1	1	-0.0729517
Blvra	-0.0128744	1	-0.0515387	1	-0.0303447	1	1	-0.031586
Blvrb	-0.0317774	1	0.0761	1	-0.0639257	1	1	-0.00653434
Blzf1	-0.0320653	1	-0.0302854	1	-0.0122975	1	1	-0.0248827
Bmi1	-0.0441353	1	0.000746576	1	-0.046164	1	1	-0.0298509
Bmp1	0.125598	1	-0.0807724	1	0.189334	1	1	0.0780535
Bmp2k	-0.0270815	1	-0.0403612	1	-0.0491003	1	1	-0.0388476
Bmp7	-0.0160416	1	-0.156217	1	-0.143691	0.0222387	0.267942	-0.105317
Bmpr1a	-0.0280381	1	-0.0181611	1	0.0515015	1	1	0.00176742
Bmpr2	0.0206132	1	-0.0518513	1	0.0590461	1	1	0.00926933
Bms1	-0.071364	1	-0.0704333	1	-0.0218313	1	1	-0.0545429
Bmt2	-0.0232945	1	0.0144541	1	-0.0477335	1	1	-0.018858
Bmyc	-0.00723385	1	0.0441609	1	-0.00055201	1	1	0.012125
Bnc1	-0.0263258	1	-0.0876725	1	0.0332718	1	1	-0.0269088
Bnip1	-0.00391285	1	-0.109771	1	-0.0270991	1	1	-0.0469276
Bnip2	0.0119524	1	-0.129606	1	-0.0888346	1	1	-0.0688293
Bnip3	0.0815701	1	-0.0864929	1	0.0360439	1	1	0.0103737
Bnip3l	-0.048227	1	0.0553252	1	0.0983253	1	1	0.0351412
Bod1	0.0721718	1	-0.0420662	1	-0.0503865	1	1	-0.00676031
Bod1l	0.00845036	1	-0.0898289	1	-0.0651251	1	1	-0.0488345
Bok	0.166375	1	0.174371	1	0.175809	1	1	0.172185
Bola1	0.00405913	1	0.017395	1	0.0153762	1	1	0.0122768
Bola2	-0.0677924	1	0.148862	1	-0.00902544	1	1	0.0240147
Bola3	0.0661164	1	-0.0198462	1	-0.0144787	1	1	0.0105972
Bop1	-0.0158017	1	-0.0694841	1	-0.0494041	1	1	-0.0448966
Bora	0.0317928	1	-0.0215938	1	-0.00617644	1	1	0.00134085
Borcs5	-0.0064352	1	0.0503364	1	0.00572754	1	1	0.0165429
Borcs6	-0.0294856	1	0.0287577	1	-0.0268274	1	1	-0.00918508
Borcs7	-0.0558316	1	-0.0358059	1	-0.0531275	1	1	-0.048255
Borcs8	0.0763794	1	0.233293	1	0.0994982	1	1	0.13639
Bpgm	-0.00523644	1	-0.0626435	1	0.0506642	1	1	-0.00573859
Bphl	-0.0070953	1	0.0150329	1	-0.038077	1	1	-0.0100465
Bpnt1	0.012988	1	-0.0265191	1	0.0140187	1	1	0.000162557
Bptf	-0.15085	1	-0.210311	1	-0.00879501	1	1	-0.123319
Braf	0.0046367	1	0.0153736	1	0.0157518	1	1	0.0119207
Brap	0.00487952	1	-0.0530625	1	-0.0248999	1	1	-0.024361
Brat1	-0.00566771	1	-0.0208685	1	-0.00294599	1	1	-0.00982741
Brca1	-0.0183455	1	-0.0467665	1	-0.0263524	1	1	-0.0304881
Brca2	-0.00479182	1	-0.0158759	1	-0.0466182	1	1	-0.0224286
Brcc3	-0.00669483	1	0.165765	1	-0.00711631	1	1	0.0506512
Brd1	-0.0448984	1	-0.0361066	1	0.0237891	1	1	-0.019072
Brd2	-0.237754	0.972234	-0.185728	1	-0.129994	1	0.999996	-0.184492
Brd3	0.0186781	1	-0.0177084	1	-0.0219734	1	1	-0.00700123
Brd4	-0.0819044	1	-0.0669156	1	-0.0212617	1	1	-0.0566939
Brd7	0.0340145	1	0.0380442	1	0.0244715	1	1	0.0321767
Brd8	-0.0626148	1	-0.00263156	1	-0.0706379	1	1	-0.0452948
Brd9	-0.0485211	1	-0.0285005	1	-0.0565089	1	1	-0.0445102
Brf1	-0.024135	1	-0.102934	1	0.0393086	1	1	-0.0292536
Brf2	0.0056251	1	-0.00342507	1	0.000590933	1	1	0.000930319
Bri3	-0.0205712	1	-0.0927537	1	-0.0155683	1	1	-0.0429644
Bri3bp	-0.035688	1	-0.208177	1	-0.0254995	1	1	-0.0897882
Brip1	0.000358241	1	0.0643704	1	0.00677687	1	1	0.0238352
Brip1os	-0.0149071	1	-0.0621045	1	-0.0316847	1	1	-0.0362321
Brix1	0.00306354	1	-0.253005	1	-0.00273971	1	1	-0.0842269
Brk1	-0.0361622	1	-0.138161	1	-0.0694495	1	1	-0.0812575
Brms1	-0.0294526	1	0.0465025	1	-0.00368907	1	1	0.00445361
Brms1l	-0.00404827	1	-0.0557665	1	0.0101444	1	1	-0.0165568
Brox	0.05083	1	0.0132104	1	0.0260529	1	1	0.0300311
Brpf1	-0.0327985	1	-0.0583032	1	-0.00866619	1	1	-0.033256
Brpf3	-0.0258929	1	-0.0180734	1	-0.030839	1	1	-0.0249351
Brsk1	-0.0323236	1	0.093314	1	-0.0297504	1	1	0.0104133
Brwd1	0.0179381	1	-0.0677924	1	0.0268948	1	1	-0.00765319
Brwd3	-0.0290058	1	-0.00550739	1	0.0186321	1	1	-0.00529371
Bscl2	-0.0141436	1	-0.057895	1	-0.00796418	1	1	-0.0266676
Bsdc1	-0.0130311	1	0.0208692	1	-0.00708525	1	1	0.000250944
Bsg	-0.100684	1	-0.0521961	1	0.0389352	1	1	-0.0379816
Bsn	0.00691786	1	0.037258	1	-0.0181719	1	1	0.00866795
Bst2	0.309376	1	-0.139014	1	-0.082319	1	1	0.0293475
Btaf1	-0.0257284	1	-0.103216	1	-0.027886	1	1	-0.0522766
Btbd1	0.0745563	1	-0.00903952	1	0.0259119	1	1	0.0304762
Btbd10	-0.0187736	1	0.0105272	1	0.00254607	1	1	-0.00190012
Btbd11	-0.0150964	1	-0.0259521	1	0.000945932	1	1	-0.0133675
Btbd19	0.0101657	1	-0.0168198	1	-0.0044137	1	1	-0.00368925
Btbd2	-0.0112368	1	-0.0619828	1	-0.0238171	1	1	-0.0323456
Btbd3	-0.00114645	1	-0.00946221	1	-0.0365453	1	1	-0.015718
Btbd6	-0.0198707	1	-0.017845	1	-0.0169847	1	1	-0.0182335
Btbd7	-0.0107038	1	0.13178	1	0.0517708	1	1	0.0576156
Btbd9	-0.032213	1	-0.0775188	1	-0.0247029	1	1	-0.0448116
Btd	0.0214569	1	-0.0307576	1	-0.00991239	1	1	-0.00640435
Btf3	0.0865923	1	0.143519	1	0.0325094	1	1	0.0875403
Btf3l4	-0.0189348	1	-0.0792262	1	-0.0364139	1	1	-0.0448583
Btg1	-0.191417	1	-0.383149	1	0.0190903	1	1	-0.185159
Btg2	0.109699	1	0.0450024	1	0.138377	1	1	0.0976929
Btg3	-0.0991357	1	-0.0894316	1	-0.141795	1	1	-0.110121
Btrc	-0.0533562	1	-0.10118	1	-0.04627	1	1	-0.0669354
Bub1	-0.007198	1	-0.063013	1	-0.003566	1	1	-0.0245923
Bub1b	0.0392489	1	-0.0529458	1	0.0228408	1	1	0.00304793
Bub3	0.00525816	1	0.103467	1	0.00173084	1	1	0.0368185
Bud13	0.00677934	1	-0.0215712	1	-0.0331465	1	1	-0.0159795
Bud23	0.0229603	1	0.207622	1	0.0247266	1	1	0.0851031
Bud31	-0.115746	1	-0.120549	1	-0.0818941	1	1	-0.106063
Bvht	-0.0207091	1	-0.0210639	1	0.0005296	1	1	-0.0137478
Bysl	-0.00781876	1	0.0602949	1	-0.0129401	1	1	0.0131787
Bzw1	0.0843059	1	0.0534954	1	0.00821054	1	1	0.0486706
Bzw2	-0.10287	1	-0.0569299	1	-0.0794977	1	1	-0.0797657
C030006K11Rik	0.00425496	1	-0.011456	1	0.00592281	1	1	-0.000426082
C130071C03Rik	0.0136278	1	0.0110776	1	-0.0258811	1	1	-0.000391913
C1d	-0.0122395	1	-0.160789	1	-0.056669	1	1	-0.0765659
C1galt1	0.0349707	1	0.163805	1	-0.00700136	1	1	0.0639247
C1galt1c1	0.00853039	1	0.143703	1	0.0160738	1	1	0.0561024
C1qbp	-0.0201387	1	-0.0246449	1	-0.0700197	1	1	-0.0382677
C1qtnf1	0.0470766	1	0.318778	1	0.101024	1	1	0.155626
C1qtnf12	-0.010636	1	0.0801955	1	-0.0343068	1	1	0.0117509
C1qtnf6	-0.012717	1	0.00877243	1	-0.00947508	1	1	-0.00447321
C1ra	0.0283795	1	-0.0294419	1	-0.0216031	1	1	-0.00755519
C1rb	-0.00504804	1	-0.0330276	1	-0.0191997	1	1	-0.0190918
C1s1	-0.0188408	1	-0.00571104	1	-0.0181318	1	1	-0.0142279
C230037L18Rik	0.0177484	1	-0.0140168	1	-0.00837347	1	1	-0.00154729
C2cd2	0.0203031	1	0.011589	1	-0.00328879	1	1	0.00953445
C2cd2l	-0.0051551	1	-0.00990532	1	-0.0076	1	1	-0.00755347
C2cd3	0.00855158	1	-0.0112773	1	-0.012719	1	1	-0.00514824
C2cd5	-0.0118112	1	-0.0182986	1	-0.01903	1	1	-0.0163799
C3	0.144545	1	0.281159	1	0.311726	1	1	0.24581
C330007P06Rik	-0.0137757	1	-0.0214919	1	-0.00225384	1	1	-0.0125071
C330018D20Rik	0.0249145	1	-0.0139252	1	-0.00322445	1	1	0.00258825
C330027C09Rik	0.0333519	1	-0.0658726	1	0.0387425	1	1	0.00207396
C430042M11Rik	-0.0275129	1	-0.0452616	1	-0.00685381	1	1	-0.0265428
C4b	-0.0214095	1	0.0189993	1	-0.0398564	1	1	-0.0140888
C730034F03Rik	-0.0424595	1	-0.0104619	1	-0.0370662	1	1	-0.0299959
C77080	-0.0105355	1	-0.154308	1	0.0963143	1	1	-0.0228429
C87436	0.0143168	1	-0.0229553	1	0.0185792	1	1	0.00331359
CAAA01118383.1	-0.0670206	1	-0.0394091	1	0.0537343	1	1	-0.0175651
CAAA01147332.1	0.0569186	1	-0.071913	1	-0.00795031	1	1	-0.00764824
Caap1	-0.0145416	1	0.0761908	1	-0.00965218	1	1	0.0173323
Cab39	-0.0172732	1	-0.0238817	1	0.0290276	1	1	-0.00404244
Cab39l	0.0427306	1	-0.0421469	1	0.0842249	1	1	0.0282695
Cabin1	-0.00591273	1	-0.0198035	1	-0.0184895	1	1	-0.0147353
Cables2	-0.0113246	1	-0.0431932	1	-0.00962934	1	1	-0.0213824
Cacfd1	0.0433367	1	-0.019754	1	-0.0115752	1	1	0.00400246
Cachd1	-0.00209561	1	0.0154452	1	-0.0244229	1	1	-0.00369109
Cacna1a	0.00117131	1	-0.0100757	1	-0.0148727	1	1	-0.00792572
Cacnb3	0.0113508	1	-0.0260999	1	-0.0315753	1	1	-0.0154415
Cactin	-0.0473483	1	-0.0171152	1	-0.0277897	1	1	-0.0307511
Cacul1	-0.013399	1	0.111855	1	-0.00619026	1	1	0.0307551
Cacybp	-0.0546449	1	-0.0803361	1	-0.129146	1	1	-0.0880424
Cad	-0.00837965	1	0.000334499	1	0.0135941	1	1	0.00184965
Cadm4	0.00102838	1	-0.0150637	1	0.0310322	1	1	0.00566564
Cadps2	-0.0104829	1	-0.0246909	1	0.00421722	1	1	-0.0103189
Calcoco1	-0.0289324	1	-0.075615	1	-0.00430266	1	1	-0.0362833
Cald1	0.136556	1	0.38832	1	-0.2417	1	1	0.094392
Calhm2	0.0109905	1	-0.0164948	1	-0.00402591	1	1	-0.00317673
Calm1	0.00762743	1	-0.0117379	1	-0.0633227	1	1	-0.0224777
Calm2	-0.0743711	1	0.168457	1	-0.139105	1	1	-0.0150065
Calm3	0.124379	1	-0.205085	1	0.121544	1	1	0.0136128
Calr	0.243189	0.294251	-0.0393501	1	0.25519	1	0.87439	0.15301
Calr3	-0.00653609	1	-0.0519226	1	-0.0149555	1	1	-0.0244714
Calr4	0.0695369	1	-0.00808052	1	0.0238885	1	1	0.0284483
Calu	0.0837032	1	0.121977	1	0.0249183	1	1	0.0768663
Camk1	-0.058104	1	-0.119833	1	-0.0494858	1	1	-0.0758076
Camk1d	-0.014645	1	-0.0131731	1	-0.0115764	1	1	-0.0131315
Camk2d	-0.0454684	1	-0.012782	1	0.244639	0.954493	0.999984	0.0621296
Camk2g	-0.030086	1	0.248128	1	-0.022465	1	1	0.0651922
Camk2n1	-0.0170553	1	0.203144	1	-0.0699982	1	1	0.0386967
Camk2n2	0.00802903	1	-0.0927416	1	-0.047049	1	1	-0.0439205
Camkk2	-0.0323875	1	-0.0462431	1	-0.038059	1	1	-0.0388965
Caml	-0.00514305	1	-0.144369	1	-0.0308097	1	1	-0.0601072
Camsap1	-0.0698163	1	-0.0669429	1	0.0424888	1	1	-0.0314235
Camsap2	-0.00188389	1	-0.0103001	1	0.0241828	1	1	0.00399959
Camta1	0.0232409	1	0.00470284	1	0.0342216	1	1	0.0207218
Camta2	-0.0160655	1	-0.031992	1	-0.00819301	1	1	-0.0187502
Cand1	-0.03709	1	-0.0796544	1	-0.0476004	1	1	-0.0547816
Cand2	-0.00500394	1	-0.0548609	1	-0.019834	1	1	-0.0265663
Cant1	-0.0147359	1	0.006691	1	-0.00600863	1	1	-0.0046845
Canx	-0.00643414	1	0.136827	1	0.0341598	1	1	0.0548508
Cap1	0.185797	0.891971	-0.199284	1	0.27719	0.05375	0.41479	0.0879009
Capg	0.376536	3.23721e-08	-0.273091	1	0.25778	0.0521133	3.79961e-07	0.120408
Capn1	-0.0514922	1	-0.14978	1	0.0725464	1	1	-0.0429085
Capn10	0.0112565	1	0.00113471	1	0.0320829	1	1	0.0148247
Capn15	0.0127441	1	-0.0412064	1	-0.00615719	1	1	-0.0115398
Capn2	0.0508161	1	0.0308699	1	0.110841	1	1	0.0641757
Capn7	-0.00658595	1	0.0407098	1	0.0100744	1	1	0.0147328
Capns1	0.0227578	1	-0.0485462	1	-0.0296062	1	1	-0.0184649
Caprin1	-0.0795305	1	0.00428594	1	-0.0345413	1	1	-0.0365953
Caprin2	-0.0250204	1	0.0223185	1	-0.00826708	1	1	-0.0036563
Capza1	-0.0246886	1	0.114625	1	0.057632	1	1	0.0491895
Capza2	0.00342454	1	0.0326584	1	0.0866707	1	1	0.0409179
Capzb	-0.0064525	1	-0.0711585	1	-0.0802293	1	1	-0.0526134
Car12	-0.015732	1	0.090876	1	0.0263428	1	1	0.0338289
Car13	0.0882722	1	-0.0223865	1	0.112096	1	1	0.0593272
Car5b	0.17269	0.00206137	-0.0317554	1	0.113116	1	0.0542299	0.0846835
Car9	-0.0413312	1	-0.159592	1	0.111523	1	1	-0.0297998
Card10	-0.0801945	1	-0.193502	1	0.0114756	1	1	-0.0874071
Card19	0.10557	1	0.118062	1	0.0429409	1	1	0.0888578
Card6	0.0125621	1	0.0325034	1	0.0501209	1	1	0.0317288
Carf	-0.00243796	1	0.00485453	1	-0.00488062	1	1	-0.000821351
Carhsp1	0.147607	1	-0.156925	1	-0.0137252	1	1	-0.00768097
Carm1	-0.00929096	1	0.000631176	1	-0.0585547	1	1	-0.0224048
Carmil1	-0.0110946	1	-0.00143159	1	0.0300997	1	1	0.00585785
Carnmt1	-0.0540122	1	0.127693	1	-0.061701	1	1	0.00399324
Cars	0.0145689	1	-0.093781	1	0.047277	1	1	-0.010645
Cars2	0.0339885	1	0.0683587	1	-0.0248367	1	1	0.0258368
Casc3	-0.0680349	1	-0.0571294	1	-0.0216141	1	1	-0.0489261
Casc4	0.011289	1	0.0855377	1	-0.0981424	1	1	-0.00043856
Casd1	0.0454998	1	-0.00220946	1	0.047111	1	1	0.0301338
Cask	0.0240165	1	-0.074613	1	-0.0358763	1	1	-0.0288243
Caskin2	0.00368978	1	-0.0244871	1	0.0121795	1	1	-0.00287259
Casp1	0.044478	1	-0.0254784	1	-0.177818	1	1	-0.0529394
Casp12	-0.0436818	1	-0.0233504	1	0.0848096	1	1	0.0059258
Casp2	0.000588344	1	-0.0166146	1	0.00992713	1	1	-0.00203304
Casp3	0.0638006	1	-0.147013	1	0.209021	1	1	0.0419362
Casp4	0.014705	1	-0.0492691	1	-0.0374607	1	1	-0.0240083
Casp6	0.0157629	1	-0.014026	1	0.0016983	1	1	0.00114507
Casp7	0.00373599	1	-0.0552394	1	-0.0173352	1	1	-0.0229462
Casp8	-0.0142618	1	0.156215	1	0.0474107	1	1	0.0631214
Casp8ap2	0.0237329	1	0.0205614	1	-0.0154683	1	1	0.00960865
Casp9	-0.00824833	1	-0.00680173	1	-0.0052139	1	1	-0.00675465
Cast	0.0569888	1	0.00804109	1	0.0552973	1	1	0.0401091
Cat	0.0138339	1	0.0499732	1	-0.0490965	1	1	0.00490352
Cav1	-0.0114354	1	0.0757946	1	0.00192318	1	1	0.0220941
Cav2	0.00626052	1	0.00159287	1	0.0324353	1	1	0.0134296
Cavin1	-0.106834	1	-0.2923	1	-0.043186	1	1	-0.14744
Cavin2	-0.0578229	1	-0.0903271	1	-0.153989	0.196042	0.775726	-0.100713
Cavin3	0.0229034	1	-0.373533	1	0.0546593	1	1	-0.0986566
Cbarp	-0.00899152	1	-0.0394432	1	-0.0173205	1	1	-0.0219184
Cbfa2t2	-0.0473104	1	-0.0719243	1	-0.0172058	1	1	-0.0454802
Cbfb	0.0653923	1	0.0517039	1	0.0653947	1	1	0.0608303
Cbl	-0.0359587	1	0.0261899	1	0.0110306	1	1	0.000420618
Cblb	-0.0309052	1	-0.0113273	1	0.00617147	1	1	-0.0120203
Cblc	0.0753994	1	-0.0699469	1	0.0245861	1	1	0.0100129
Cbll1	-0.0561923	1	-0.00763725	1	0.0333268	1	1	-0.0101676
Cbr1	-0.012641	1	0.123271	1	-0.0112823	1	1	0.0331158
Cbr2	-0.0175485	1	-0.0123795	1	-0.0150439	1	1	-0.0149906
Cbr4	0.055227	1	-0.0448617	1	0.0598514	1	1	0.0234056
Cbwd1	-0.0185858	1	-0.100285	1	-0.0376726	1	1	-0.052181
Cbx1	-0.0154014	1	0.262649	1	0.0126589	1	1	0.0866353
Cbx2	0.00949496	1	0.0949588	1	-0.0044069	1	1	0.033349
Cbx3	0.0359962	1	-0.00186204	1	-0.105428	1	1	-0.0237648
Cbx4	-0.10734	1	-0.172706	1	-0.139172	1	1	-0.139739
Cbx5	-0.0249946	1	0.0433241	1	-0.0615347	1	1	-0.0144017
Cbx6	-0.00587767	1	-0.0127636	1	-0.0396033	1	1	-0.0194149
Cbx7	0.00223291	1	0.0112411	1	-0.0123543	1	1	0.000373237
Cbx8	-0.0370553	1	-0.0124033	1	0.0067128	1	1	-0.0142486
Cby1	-0.00531253	1	0.121639	1	0.0147389	1	1	0.0436886
Cc2d1a	-0.0254276	1	-0.0768089	1	-0.0292899	1	1	-0.0438421
Cc2d1b	0.0151056	1	-0.00514974	1	0.0114264	1	1	0.00712741
Cc2d2a	-0.0368867	1	-0.0398428	1	-0.00640893	1	1	-0.0277128
Ccar1	-0.0460053	1	-0.0163835	1	0.0598694	1	1	-0.000839803
Ccar2	0.0183644	1	0.0557936	1	-0.0359437	1	1	0.0127381
Ccbe1	0.0796347	1	0.112178	1	0.126271	1	1	0.106028
Ccdc102a	0.0171596	1	-0.00916425	1	0.0142146	1	1	0.00740332
Ccdc107	0.0200315	1	0.06335	1	-0.0418922	1	1	0.0138298
Ccdc112	0.00349998	1	-0.0212019	1	0.00176575	1	1	-0.00531206
Ccdc114	-0.000761803	1	0.00651424	1	0.00894141	1	1	0.00489795
Ccdc115	-0.00809773	1	0.0298007	1	-0.0320713	1	1	-0.00345611
Ccdc117	-0.0223842	1	-0.0239339	1	0.00464304	1	1	-0.0138917
Ccdc12	0.0633891	1	0.0118357	1	0.0336498	1	1	0.0362916
Ccdc120	-0.00950537	1	-0.0182302	1	-0.000402528	1	1	-0.00937936
Ccdc122	0.0239035	1	0.031029	1	0.0153589	1	1	0.0234305
Ccdc124	0.0812966	1	-0.0689365	1	-0.0180642	1	1	-0.00190135
Ccdc125	0.0166683	1	0.0253114	1	-0.0108159	1	1	0.0103879
Ccdc126	-0.0092814	1	-0.0420203	1	-0.00709547	1	1	-0.0194657
Ccdc127	-0.0221981	1	-0.0859816	1	-0.022358	1	1	-0.0435126
Ccdc130	-0.026234	1	0.00203332	1	-0.00808894	1	1	-0.0107632
Ccdc136	0.00402321	1	-0.0127546	1	-0.0406988	1	1	-0.0164767
Ccdc137	-0.0239307	1	0.054615	1	-0.0251063	1	1	0.00185933
Ccdc138	-0.0115981	1	-0.0207651	1	-0.0285865	1	1	-0.0203166
Ccdc14	0.00466554	1	-0.0106793	1	0.00365559	1	1	-0.000786043
Ccdc149	0.00553078	1	-0.0123647	1	-0.00364538	1	1	-0.0034931
Ccdc15	-0.0157924	1	-0.000465381	1	-0.011793	1	1	-0.00935024
Ccdc157	-0.0193981	1	-0.0071749	1	-0.0181217	1	1	-0.0148982
Ccdc163	0.00686659	1	0.00303579	1	0.0746426	1	1	0.0281817
Ccdc167	0.0119285	1	-0.0319229	1	0.00321587	1	1	-0.00559286
Ccdc173	0.00928347	1	-0.0250156	1	0.00187127	1	1	-0.0046203
Ccdc174	-0.00982374	1	0.13508	1	-0.0099105	1	1	0.0384486
Ccdc18	-0.00705078	1	-0.0325695	1	-0.00956434	1	1	-0.0163949
Ccdc181	-0.0152248	1	-0.116734	1	0.00627627	1	1	-0.0418941
Ccdc186	0.00266678	1	-0.0791296	1	-0.0550833	1	1	-0.0438487
Ccdc189	-0.00988686	1	0.0132508	1	-0.00550274	1	1	-0.000712946
Ccdc191	-0.01962	1	-0.0221842	1	0.0183747	1	1	-0.00780983
Ccdc22	-0.0214495	1	-0.0750383	1	-0.0318054	1	1	-0.0427644
Ccdc25	0.0140927	1	0.104756	1	-0.0260783	1	1	0.0309233
Ccdc28a	0.0107334	1	-0.0881389	1	0.00075251	1	1	-0.025551
Ccdc28b	-0.00309941	1	-0.0112634	1	0.00382066	1	1	-0.00351405
Ccdc32	-0.0402603	1	-0.0356781	1	-0.029535	1	1	-0.0351578
Ccdc34	0.117624	1	-0.183075	1	0.0250205	1	1	-0.0134768
Ccdc43	0.0198343	1	-0.0928624	1	-0.00363608	1	1	-0.0255547
Ccdc47	-0.00839452	1	-0.0369882	1	0.0947385	1	1	0.0164519
Ccdc50	0.000221277	1	-0.0666014	1	-0.00696933	1	1	-0.0244498
Ccdc51	-0.0152534	1	0.00437431	1	-0.00658151	1	1	-0.0058202
Ccdc57	0.0116671	1	-0.0085972	1	-0.00951619	1	1	-0.00214875
Ccdc58	0.101493	1	-0.0637852	1	-0.00211729	1	1	0.0118634
Ccdc59	0.0186319	1	-0.136521	1	0.0189999	1	1	-0.032963
Ccdc6	-0.0510488	1	0.0298367	1	-0.0211957	1	1	-0.014136
Ccdc61	-0.0141175	1	-0.110119	1	0.0291285	1	1	-0.0317025
Ccdc66	0.000320294	1	-0.00434766	1	0.0405966	1	1	0.0121897
Ccdc68	0.124922	1	0.143481	1	0.106619	1	1	0.125007
Ccdc71	0.00536277	1	-0.136602	1	-0.0157123	1	1	-0.0489838
Ccdc71l	-0.0271062	1	0.142586	1	-0.0193937	1	1	0.0320288
Ccdc77	-0.00743372	1	0.062025	1	-0.0140114	1	1	0.0135266
Ccdc82	-0.0426638	1	-0.105669	1	-0.102781	1	1	-0.0837047
Ccdc84	-0.00591885	1	0.0021332	1	0.0145572	1	1	0.00359053
Ccdc85b	-0.164968	0.512086	-0.206691	1	-0.24633	0.00768969	0.0861078	-0.205996
Ccdc85c	-0.00652854	1	-0.0475333	1	0.0200829	1	1	-0.0113263
Ccdc86	-0.0851399	1	-0.226108	1	-0.069447	1	1	-0.126898
Ccdc88a	-0.0940624	1	-0.163594	1	-0.0653808	1	1	-0.107679
Ccdc88c	-0.0379261	1	-0.0510563	1	0.0278521	1	1	-0.0203768
Ccdc9	-0.0354528	1	-0.107506	1	-0.0510183	1	1	-0.0646589
Ccdc90b	0.00113998	1	0.0794112	1	-0.043156	1	1	0.0124651
Ccdc91	0.000592681	1	-0.0763511	1	-0.0247121	1	1	-0.0334902
Ccdc92	0.00527267	1	-0.0217706	1	-0.0098142	1	1	-0.0087707
Ccdc93	-0.0247435	1	0.0354332	1	-0.0119882	1	1	-0.000432852
Ccdc94	-0.00324654	1	-0.034937	1	0.0120106	1	1	-0.0087243
Ccdc97	-0.0157011	1	0.0197419	1	0.0087936	1	1	0.00427814
Cchcr1	-0.0498842	1	0.00407751	1	-0.0227388	1	1	-0.0228485
Ccl2	-0.374531	1	-0.340569	1	-0.577148	1	1	-0.430749
Ccl25	0.028004	1	-0.0489826	1	0.00501856	1	1	-0.00532
Ccl3	0.036786	1	-0.119163	1	0.0139743	1	1	-0.0228008
Ccl4	0.123938	1	-0.020714	1	-0.0277044	1	1	0.0251734
Ccl5	0.313368	1	-0.171124	1	-0.138013	1	1	0.00141037
Ccm2	-0.037965	1	0.190651	1	-0.0124361	1	1	0.0467501
Ccna2	0.0748103	1	-0.0368887	1	0.0191028	1	1	0.0190081
Ccnb1	0.0691638	1	0.238264	1	0.0911846	1	1	0.132871
Ccnb1ip1	-0.0164596	1	-0.0059466	1	-0.0190239	1	1	-0.01381
Ccnb2	0.165121	1	-0.169147	1	0.142757	1	1	0.0462436
Ccnc	0.0282179	1	-0.0866277	1	-0.00621017	1	1	-0.02154
Ccnd1	0.137303	1	-0.0755854	1	0.0655616	1	1	0.0424264
Ccnd2	-0.0585031	1	-0.0752409	1	-0.0864814	1	1	-0.0734085
Ccnd3	-0.0790553	1	-0.0825586	1	-0.0860182	1	1	-0.082544
Ccndbp1	-0.0791987	1	-0.0433554	1	-0.0135525	1	1	-0.0453689
Ccne1	0.00798	1	0.0515258	1	-0.0243798	1	1	0.0117086
Ccne2	-0.0196002	1	0.0230596	1	-0.0119267	1	1	-0.00282243
Ccnf	-0.0302756	1	-0.0468998	1	-0.00835972	1	1	-0.0285117
Ccng1	0.0177015	1	-0.0203763	1	0.0104617	1	1	0.00259561
Ccng2	-0.0765844	1	-0.00370061	1	-0.09112	1	1	-0.057135
Ccnh	-0.0112187	1	0.472309	1	0.034697	1	1	0.165262
Ccni	-0.0393838	1	-0.0286671	1	-0.0497538	1	1	-0.0392682
Ccnj	-0.00315149	1	-0.00713888	1	-0.024637	1	1	-0.0116424
Ccnk	0.0203704	1	0.0484529	1	-0.0181934	1	1	0.0168766
Ccnl1	-0.155231	1	-0.176624	1	-0.122738	1	1	-0.151531
Ccnl2	-0.0731716	1	-0.0265785	1	-0.0128988	1	1	-0.0375497
Ccnt1	-0.0120174	1	0.00725152	1	-0.0125947	1	1	-0.00578687
Ccnt2	-0.053119	1	0.0497421	1	0.00955166	1	1	0.00205824
Ccny	0.00366379	1	0.125313	1	-0.0228478	1	1	0.0353765
Ccnyl1	0.00577186	1	-0.0340231	1	-0.0113441	1	1	-0.0131984
Ccp110	0.0123898	1	0.0158798	1	0.0784248	1	1	0.0355648
Ccpg1	-0.00515757	1	-0.00849035	1	-0.0219092	1	1	-0.0118524
Ccpg1os	-0.0196233	1	-0.0372552	1	-0.026211	1	1	-0.0276965
Ccr1	-0.0068547	1	-0.0492732	1	0.00445714	1	1	-0.0172236
Ccrl2	-0.0511995	1	-0.0535979	1	0.0764385	1	1	-0.00945298
Ccs	-0.0716132	1	-0.125066	1	-0.0348225	1	1	-0.0771671
Ccsap	-0.000998157	1	-0.0500359	1	-0.00272786	1	1	-0.0179206
Ccser2	0.00626165	1	-0.113496	1	0.0183049	1	1	-0.0296432
Cct2	-0.0167426	1	-0.119077	1	-0.00874485	1	1	-0.0481882
Cct3	0.080198	1	-0.0549138	1	0.0480522	1	1	0.0244455
Cct4	-0.0111447	1	-0.128005	1	-0.0321007	1	1	-0.0570834
Cct5	0.0657489	1	0.091915	1	0.043908	1	1	0.0671906
Cct7	0.0985583	1	0.201479	1	-0.0336023	1	1	0.0888115
Cct8	0.115607	1	-0.181623	1	0.00779476	1	1	-0.0194071
Ccz1	-0.0625843	1	-0.12763	1	-0.0201949	1	1	-0.0701363
Cd14	-0.0293038	1	0.0780709	1	0.081845	1	1	0.0435373
Cd151	0.0111509	1	-0.243636	1	0.023938	1	1	-0.0695156
Cd164	-0.207495	1	-0.155165	1	0.0160483	1	1	-0.115537
Cd1d1	-0.0488598	1	-0.131913	1	-0.0297416	1	1	-0.0701716
Cd24a	-0.0924133	1	0.00120714	1	0.00409367	1	1	-0.0290375
Cd274	-0.075727	1	-0.0387826	1	-0.0720981	1	1	-0.0622026
Cd276	0.0033908	1	0.000136909	1	0.0492527	1	1	0.0175935
Cd2ap	0.0518273	1	0.0277306	1	0.0573005	1	1	0.0456195
Cd2bp2	0.0368982	1	-0.0630574	1	-0.0985509	1	1	-0.04157
Cd300lf	-0.0465026	1	0.10847	1	-0.00436848	1	1	0.0191998
Cd320	-0.0355844	1	0.0570579	1	-0.065899	1	1	-0.0148085
Cd33	0.00463187	1	0.0988637	1	-0.00420331	1	1	0.0330974
Cd38	0.00862458	1	0.0332331	1	0.007508	1	1	0.0164552
Cd3eap	-0.020211	1	-0.215013	1	-0.0112926	1	1	-0.0821721
Cd40	0.026999	1	0.0279834	1	-0.0130099	1	1	0.0139908
Cd44	0.0292927	1	-0.290426	1	0.261578	1	1	0.000148424
Cd47	0.103852	1	0.00324183	1	0.210853	1	1	0.105982
Cd52	-0.0149832	1	-0.170902	1	-0.0020181	1	1	-0.0626343
Cd53	-0.00959486	1	-0.0394969	1	0.032028	1	1	-0.00568793
Cd63	0.066408	1	0.102121	1	0.06772	1	1	0.0787495
Cd68	-0.00372217	1	-0.019242	1	0.00231705	1	1	-0.00688238
Cd74	0.133689	1	-0.157017	1	-0.328602	1	1	-0.11731
Cd81	-0.0867674	1	0.00482227	1	-0.0537708	1	1	-0.0452387
Cd82	0.212987	1	0.0271758	1	0.351612	0.000418483	0.0163352	0.197258
Cd9	0.0436574	1	0.0492643	1	-0.07541	1	1	0.00583721
Cd99l2	0.00923809	1	0.142121	1	-0.0133521	1	1	0.0460024
Cda	-0.0835447	1	-0.0363019	1	0.0498305	1	1	-0.0233387
Cdadc1	-0.0257769	1	0.0133869	1	0.0232776	1	1	0.00362919
Cdan1	-0.0136502	1	-0.000252467	1	-0.00848182	1	1	-0.00746151
Cdc123	0.0104014	1	-0.172903	1	0.0907569	1	1	-0.0239148
Cdc14a	-0.0242909	1	-0.0797098	1	0.00457865	1	1	-0.0331407
Cdc14b	0.017071	1	0.00192723	1	-0.016067	1	1	0.000977099
Cdc16	0.0437927	1	0.130311	1	0.00259077	1	1	0.0588981
Cdc20	0.157069	1	-0.382987	1	0.164435	1	1	-0.0204943
Cdc23	-0.0218887	1	-0.0657819	1	-0.00389619	1	1	-0.0305223
Cdc25a	-0.0226232	1	0.0632223	1	-0.0353444	1	1	0.00175156
Cdc25b	0.0233884	1	-0.0162875	1	0.0157702	1	1	0.00762368
Cdc25c	0.0413698	1	0.0540219	1	0.0887092	1	1	0.061367
Cdc26	0.0124023	1	0.454818	1	-0.0384524	1	1	0.142923
Cdc27	0.00513791	1	-0.0642659	1	-0.00475462	1	1	-0.0212942
Cdc34	-0.0244677	1	-0.0282247	1	0.0173954	1	1	-0.0117657
Cdc37	-0.0230421	1	-0.047606	1	-0.134127	1	1	-0.0682585
Cdc37l1	-0.0795889	1	0.107714	1	-0.0102206	1	1	0.0059682
Cdc40	-0.120287	1	-0.0381443	1	-0.0443529	1	1	-0.0675947
Cdc42	0.0502709	1	-0.145195	1	-0.00654302	1	1	-0.0338223
Cdc42bpa	-0.017327	1	-0.0364953	1	0.0597291	1	1	0.00196894
Cdc42bpb	-0.00422973	1	-0.00165758	1	-0.00295505	1	1	-0.00294745
Cdc42bpg	0.0101899	1	-0.044428	1	0.0330356	1	1	-0.000400844
Cdc42ep1	-0.0784463	1	-0.348898	1	-0.0655381	1	1	-0.164294
Cdc42ep2	0.00480721	1	0.02036	1	-0.0222959	1	1	0.000957075
Cdc42ep3	-0.0695319	1	-0.0887871	1	-0.0352662	1	1	-0.0645284
Cdc42ep4	-0.045323	1	-0.00292608	1	-0.0624547	1	1	-0.0369013
Cdc42ep5	0.0891034	1	0.0986137	1	0.000999712	1	1	0.0629056
Cdc42se1	-0.0104154	1	0.000497361	1	0.0454585	1	1	0.0118468
Cdc42se2	0.00925947	1	-0.00653316	1	-0.0325775	1	1	-0.00995038
Cdc45	0.0597153	1	0.127428	1	0.0143148	1	1	0.0671528
Cdc5l	-0.0922885	1	-0.0871068	1	-0.0486869	1	1	-0.0760274
Cdc6	0.00419958	1	0.00637739	1	-0.00322038	1	1	0.0024522
Cdc7	-0.00312724	1	-0.0322869	1	-0.0274643	1	1	-0.0209595
Cdc73	0.0127658	1	0.0194299	1	0.0169298	1	1	0.0163752
Cdca2	-0.00322469	1	-0.0527269	1	0.00240633	1	1	-0.0178484
Cdca3	0.0360967	1	-0.0688671	1	0.0293958	1	1	-0.00112486
Cdca4	-0.0329952	1	0.0120632	1	-0.0727167	1	1	-0.0312162
Cdca5	-0.0233529	1	-0.0241878	1	-0.0146196	1	1	-0.0207201
Cdca7	0.0453485	1	-0.0186414	1	-0.0629982	1	1	-0.012097
Cdca7l	-0.0350841	1	-0.0560323	1	-0.0700715	1	1	-0.0537293
Cdca8	0.145636	1	0.020516	1	0.0907816	1	1	0.0856446
Cdcp1	0.0347611	1	-0.0279262	1	0.0142205	1	1	0.00701849
Cdh1	0.163749	0.111547	0.176194	1	0.289064	0.00270245	0.0126512	0.209669
Cdh24	0.010133	1	-0.0136182	1	0.00490848	1	1	0.00047442
Cdip1	-0.0287004	1	0.0278716	1	-0.0201999	1	1	-0.00700956
Cdipt	0.020771	1	0.0415204	1	-0.0105066	1	1	0.0172616
Cdk1	0.0565766	1	0.092815	1	0.129699	1	1	0.0930301
Cdk10	-0.00183634	1	-0.00910739	1	0.00387826	1	1	-0.00235515
Cdk11b	-0.0171903	1	0.168749	1	-0.060252	1	1	0.0304357
Cdk12	-0.0457775	1	-0.0250077	1	0.00135859	1	1	-0.0231422
Cdk13	-0.0114353	1	-0.0958434	1	0.052656	1	1	-0.0182076
Cdk14	-0.0952584	1	0.0132097	1	0.00607089	1	1	-0.0253259
Cdk16	-0.0022464	1	-0.0207499	1	0.0489677	1	1	0.00865714
Cdk17	-0.00759473	1	-0.0745838	1	0.0985854	1	1	0.00546897
Cdk18	0.0203521	1	0.00388128	1	0.00643772	1	1	0.0102237
Cdk19	-0.0224587	1	-0.00199807	1	-0.0186559	1	1	-0.0143709
Cdk2	-0.017653	1	-0.018948	1	0.0175382	1	1	-0.00635428
Cdk20	0.021117	1	-0.00233198	1	-0.000642368	1	1	0.00604756
Cdk2ap1	0.00275592	1	-0.268354	1	-0.106677	1	1	-0.124091
Cdk2ap2	-0.102901	1	-0.220485	1	-0.159901	1	1	-0.161096
Cdk4	-0.0402013	1	-0.101027	1	0.0121256	1	1	-0.0430342
Cdk5	-0.0677253	1	-0.105159	1	0.0452632	1	1	-0.0425404
Cdk5r1	-0.0254707	1	-0.0146399	1	-0.00981412	1	1	-0.0166416
Cdk5rap1	0.00635737	1	-0.0199624	1	0.0105971	1	1	-0.00100265
Cdk5rap2	0.0802663	1	-0.0266452	1	0.0256225	1	1	0.0264145
Cdk5rap3	0.00750982	1	-0.102788	1	-0.00708607	1	1	-0.0341214
Cdk6	-0.0345025	1	-0.133803	1	0.0776343	1	1	-0.0302237
Cdk7	-0.00298624	1	0.0016625	1	-0.00685447	1	1	-0.00272607
Cdk8	-0.0283719	1	0.00971208	1	0.0610634	1	1	0.0141345
Cdk9	-0.0266103	1	-0.0587909	1	-0.0273942	1	1	-0.0375985
Cdkal1	-0.0166449	1	0.0134829	1	0.056976	1	1	0.017938
Cdkl2	0.0559286	1	-0.0156284	1	0.0349111	1	1	0.0250705
Cdkl3	0.000163246	1	0.0154495	1	0.00516789	1	1	0.00692687
Cdkl5	-0.00931218	1	0.021548	1	0.00191246	1	1	0.0047161
Cdkn1a	-0.0547883	1	-0.055289	1	0.0944062	1	1	-0.00522371
Cdkn1b	-0.00412693	1	-0.0737347	1	-0.0647591	1	1	-0.0475403
Cdkn2aip	-0.0135916	1	-0.159385	1	-0.0242995	1	1	-0.0657588
Cdkn2aipnl	0.0904039	1	0.0170427	1	0.0421046	1	1	0.0498504
Cdkn2c	-0.00108137	1	0.025287	1	-0.0866276	1	1	-0.0208073
Cdkn2d	-0.0210321	1	-0.102162	1	-0.0141566	1	1	-0.0457835
Cdkn3	0.142772	1	0.0332708	1	0.0527014	1	1	0.0762482
Cdon	-0.0434862	1	-0.0954998	1	-0.0565536	1	1	-0.0651799
Cdpf1	-0.0123918	1	-0.0560211	1	-0.000209644	1	1	-0.0228742
Cdr2	0.00260613	1	0.0168077	1	-0.0257833	1	1	-0.00212315
Cdr2l	0.00805224	1	-0.0183753	1	-0.0136979	1	1	-0.00800699
Cds2	-0.00390234	1	-0.0657435	1	-0.0136911	1	1	-0.027779
Cdt1	0.0311362	1	-0.137671	1	0.00110211	1	1	-0.0351442
Cdv3	0.0280676	1	-0.216117	1	-0.0442513	1	1	-0.0774337
Cdyl	-0.0299882	1	-0.0296215	1	-0.00332817	1	1	-0.0209793
Cebpb	-0.293031	1	-0.553445	1	-0.325276	1	1	-0.390584
Cebpd	-0.0163629	1	0.209997	1	-0.0725597	1	1	0.040358
Cebpg	0.0324483	1	-0.00729397	1	-0.010938	1	1	0.00473877
Cebpz	-0.0562919	1	-0.145075	1	-0.0624923	1	1	-0.0879529
Cebpzos	0.0345551	1	0.430292	1	0.0697958	1	1	0.178214
Cela1	0.00996669	1	-0.00540874	1	-0.00499747	1	1	-0.000146507
Celf1	-0.0354935	1	-0.0426862	1	-0.00381481	1	1	-0.0273315
Celf2	-0.106592	0.0506917	-0.0519454	1	-0.0878317	1	0.427236	-0.0821232
Celf4	-0.00452383	1	0.120355	1	0.0422972	1	1	0.0527095
Celsr1	0.0275549	1	0.0542344	1	-0.00116171	1	1	0.0268759
Cenpa	0.222644	1	-0.356053	1	0.140936	1	1	0.00250928
Cenpb	0.129062	1	-0.0336927	1	-0.0340622	1	1	0.0204356
Cenpc1	-0.00651317	1	-0.0741879	1	-0.0271169	1	1	-0.0359393
Cenpe	0.1426	1	-0.159972	1	0.160903	1	1	0.0478433
Cenpf	0.185843	1	-0.222884	1	0.357094	1	1	0.106684
Cenph	0.0519776	1	0.0159375	1	-0.0241003	1	1	0.0146049
Cenpi	-0.00267185	1	0.0672759	1	0.0158744	1	1	0.0268261
Cenpj	0.00814013	1	-0.0551151	1	-0.0278674	1	1	-0.0249475
Cenpk	0.0491789	1	0.0705372	1	0.114397	1	1	0.0780378
Cenpl	-0.0103941	1	-0.0788919	1	-0.00505275	1	1	-0.0314462
Cenpm	8.31517e-05	1	0.0100176	1	-0.0233985	1	1	-0.00443256
Cenpn	0.00499766	1	-0.0260653	1	-0.019912	1	1	-0.0136599
Cenpo	-0.00753642	1	0.0307091	1	-0.014674	1	1	0.00283292
Cenpp	0.00698408	1	-0.00752865	1	0.010951	1	1	0.00346882
Cenpq	0.0214781	1	0.0367571	1	-0.000288529	1	1	0.0193156
Cenps	0.0193268	1	0.0211236	1	0.0063116	1	1	0.0155873
Cenpt	0.0160764	1	-0.100449	1	0.0729216	1	1	-0.00381694
Cenpu	0.00348727	1	-0.0332642	1	-0.0219112	1	1	-0.0172294
Cenpv	0.113358	1	0.0756645	1	0.00872131	1	1	0.0659147
Cenpw	0.00120281	1	0.106869	1	0.0474102	1	1	0.0518273
Cenpx	0.0549496	1	0.0126309	1	-0.0808849	1	1	-0.00443479
Cep104	0.03829	1	-0.0260725	1	0.00840718	1	1	0.00687488
Cep112	-0.0502847	1	-0.065148	1	-0.0448122	1	1	-0.053415
Cep120	-0.0114706	1	0.0205738	1	-0.00335003	1	1	0.00191773
Cep126	-0.00794949	1	-0.0132836	1	-0.0337874	1	1	-0.0183401
Cep131	-0.00597208	1	-0.0332049	1	-0.01565	1	1	-0.0182757
Cep135	0.00835298	1	-0.000789388	1	-0.00732802	1	1	7.85216e-05
Cep152	-0.0178304	1	-0.00732025	1	-0.0127749	1	1	-0.0126418
Cep162	-0.0401176	1	-0.151381	1	-0.0244562	1	1	-0.0719851
Cep164	-0.00650383	1	0.0278756	1	0.00274246	1	1	0.00803807
Cep170	0.012282	1	0.190215	1	0.0225138	1	1	0.0750038
Cep170b	0.00293956	1	0.0756038	1	0.108506	1	1	0.0623499
Cep19	0.0165992	1	-0.00742138	1	0.0271743	1	1	0.0121174
Cep192	-0.00825237	1	-0.0303892	1	-0.0222133	1	1	-0.020285
Cep250	0.00614012	1	-0.00379367	1	0.0295848	1	1	0.0106437
Cep290	0.0386777	1	0.0117246	1	-0.0109839	1	1	0.0131395
Cep295	-0.0297311	1	0.181396	1	-0.00175471	1	1	0.04997
Cep350	0.0582769	1	-0.02428	1	0.0451021	1	1	0.0263663
Cep41	-0.0220438	1	-0.0291162	1	0.0155998	1	1	-0.0118534
Cep44	0.0262303	1	-0.0189856	1	0.0379202	1	1	0.015055
Cep55	0.008054	1	-0.00773907	1	0.0072293	1	1	0.00251474
Cep57	-0.0603832	1	0.221209	1	-0.157002	1	1	0.00127467
Cep57l1	0.00840111	1	-0.00187431	1	0.0314254	1	1	0.0126507
Cep63	-0.0238105	1	-0.039137	1	-0.0095057	1	1	-0.0241511
Cep68	-0.0129933	1	0.00891885	1	-0.0259544	1	1	-0.0100096
Cep70	-0.014438	1	0.0368961	1	-0.00566854	1	1	0.00559652
Cep76	-0.00575345	1	-0.000275874	1	0.0424073	1	1	0.012126
Cep78	-0.015574	1	-0.0367894	1	-0.0184999	1	1	-0.0236211
Cep83	-0.00344811	1	-0.0626474	1	-0.0433631	1	1	-0.0364862
Cep85	0.00113763	1	-0.00569714	1	0.0169928	1	1	0.00414443
Cep85l	-0.010954	1	0.0767573	1	-0.0255744	1	1	0.0134096
Cep89	0.0520383	1	-0.0152144	1	0.053704	1	1	0.030176
Cep95	-0.054446	1	0.00497189	1	-0.0142028	1	1	-0.0212256
Cep97	0.00849522	1	-0.00496308	1	-0.000639144	1	1	0.000964332
Cept1	-0.0245231	1	0.256832	1	0.0379105	1	1	0.0900732
Cerk	-0.00969059	1	0.00223465	1	-0.00233173	1	1	-0.00326256
Cers2	0.0942256	1	0.230968	1	0.206386	1	1	0.177193
Cers5	-0.0134409	1	-0.00161801	1	-0.0442533	1	1	-0.0197707
Cers6	-0.0147559	1	0.0596804	1	6.13192e-05	1	1	0.0149953
Cetn2	-0.00904411	1	-0.11602	1	-0.00516311	1	1	-0.0434089
Cetn3	0.00818439	1	0.437591	1	-0.0499986	1	1	0.131925
Cetn4	-0.00706584	1	-0.0468815	1	0.00362771	1	1	-0.0167732
Cfap20	-0.0285498	1	0.0394011	1	-0.0447154	1	1	-0.011288
Cfap36	0.0116289	1	-0.0294774	1	0.0961801	1	1	0.0261105
Cfap43	-0.0404044	1	-0.045461	1	-0.0801945	1	1	-0.0553533
Cfap69	0.00296623	1	-0.00208147	1	-0.028329	1	1	-0.00914807
Cfap97	-0.0121891	1	-0.0241603	1	-0.00593689	1	1	-0.0140954
Cfdp1	0.128385	1	-0.0387365	1	-0.0460991	1	1	0.0145165
Cfl1	-0.09009	1	-0.222892	1	-0.0460564	1	1	-0.11968
Cfl2	0.010755	1	0.104999	1	-0.0344539	1	1	0.0270999
Cflar	0.0430436	1	0.0685108	1	0.0147991	1	1	0.0421179
Cggbp1	0.0257679	1	0.083354	1	-0.0405784	1	1	0.0228478
Cgn	0.0393575	1	0.0402052	1	-0.0209533	1	1	0.0195364
Cgnl1	0.318261	0.02255	0.181081	1	0.11866	1	0.270188	0.206001
Cgref1	0.0591468	1	0.019436	1	0.0479788	1	1	0.0421872
Cgrrf1	0.0247365	1	0.117347	1	0.0275582	1	1	0.0565471
Chac2	0.052139	1	-0.0339967	1	-0.0208466	1	1	-0.000901408
Chaf1a	0.0104016	1	-0.0825856	1	-0.0805492	1	1	-0.0509111
Chaf1b	0.030385	1	0.0881782	1	0.0138916	1	1	0.0441516
Champ1	0.00126106	1	0.0828911	1	-0.0145092	1	1	0.0232143
Chchd1	0.0431343	1	0.0441783	1	0.0610931	1	1	0.0494685
Chchd10	0.0295548	1	-0.0670764	1	-0.0742939	1	1	-0.0372718
Chchd2	-0.0846395	1	0.073051	1	0.0497855	1	1	0.0127323
Chchd3	-0.00618253	1	-0.00775454	1	-0.0434558	1	1	-0.019131
Chchd4	0.00197106	1	-0.0385749	1	0.000737454	1	1	-0.0119555
Chchd5	0.0113509	1	-0.0630614	1	0.0314144	1	1	-0.00676535
Chchd6	0.0366836	1	-0.0148075	1	0.0673793	1	1	0.0297518
Chchd7	-0.0292779	1	-0.046617	1	-0.0604821	1	1	-0.045459
Chd1	-0.159923	0.00941487	-0.145758	1	-0.144122	0.629008	0.114193	-0.149934
Chd1l	0.0135968	1	0.0217726	1	-0.0136669	1	1	0.00723417
Chd2	-0.0724767	1	-0.0150783	1	-0.0868943	1	1	-0.0581498
Chd3	-0.234297	0.130048	-0.138321	1	0.0145388	1	0.665892	-0.11936
Chd4	-0.133207	1	-0.06756	1	-0.00686151	1	1	-0.0692094
Chd6	-0.000996731	1	0.0484522	1	-0.0923881	1	1	-0.0149776
Chd7	-0.030227	1	0.0670245	1	0.0776113	1	1	0.0381363
Chd8	-0.0259758	1	-0.0496597	1	0.00831574	1	1	-0.0224399
Chd9	-0.00561628	1	1.25049e-05	1	0.0330292	1	1	0.00914181
Chek1	-0.0405196	1	0.0160624	1	-0.0392075	1	1	-0.0212216
Chek2	-0.00344544	1	-0.00209647	1	-0.00248989	1	1	-0.00267727
Cherp	-0.0185932	1	-0.0536664	1	0.0634974	1	1	-0.00292075
Chfr	-0.0184481	1	-0.0246781	1	0.00875947	1	1	-0.0114556
Chic2	-0.0541295	1	-0.131049	1	-0.0681601	1	1	-0.0844463
Chid1	0.00995169	1	0.0126626	1	0.0167667	1	1	0.013127
Chka	-0.0723052	1	-0.0428539	1	0.0649712	1	1	-0.0167293
Chkb	0.00252339	1	-0.0393689	1	-0.026174	1	1	-0.0210065
Chm	-0.00238734	1	-0.00592709	1	0.0239579	1	1	0.00521449
Chml	-0.011927	1	-0.0064327	1	0.0130976	1	1	-0.00175403
Chmp1a	0.023879	1	0.0600897	1	0.0337692	1	1	0.039246
Chmp1b	0.0198319	1	0.212536	1	0.0844146	1	1	0.105594
Chmp2a	0.0502694	1	0.0809763	1	0.0234783	1	1	0.0515746
Chmp2b	0.0177377	1	0.0921924	1	0.0875309	1	1	0.0658204
Chmp3	0.0555021	1	-0.120089	1	0.028249	1	1	-0.0121126
Chmp4b	0.0262757	1	0.01705	1	-0.0377539	1	1	0.00185728
Chmp4c	0.0885082	0.0749207	-0.00212556	1	0.0551742	1	0.520609	0.0471856
Chmp5	0.0380242	1	-0.15321	1	0.136091	1	1	0.0069686
Chmp6	0.0200642	1	0.480701	1	0.138606	1	1	0.213124
Chmp7	-0.0203546	1	-0.0423873	1	-0.000134347	1	1	-0.0209587
Chn1	0.037867	1	-0.100029	1	0.0261446	1	1	-0.012006
Chordc1	-0.0694646	1	-0.0579123	1	-0.0149295	1	1	-0.0474355
Chp1	-0.0517339	1	-0.108113	1	0.0497725	1	1	-0.0366913
Chpf	-0.040702	1	-0.0633167	1	0.0619301	1	1	-0.0140295
Chpf2	-0.0106063	1	0.0300925	1	-0.000957082	1	1	0.00617637
Chpt1	0.0884855	1	-0.0587	1	0.00666387	1	1	0.0121498
Chrac1	-0.0421455	1	-0.0625113	1	-0.064608	1	1	-0.0564216
Chrna1os	0.00794961	1	-0.0022677	1	0.015917	1	1	0.00719965
Chrnb1	0.038648	1	-0.0151192	1	0.0259651	1	1	0.0164979
Chst11	-0.0236659	1	-0.0272031	1	0.065382	1	1	0.00483766
Chst12	-0.00823218	1	-0.0378595	1	0.0682686	1	1	0.00739233
Chst14	0.00632335	1	-0.0145724	1	-0.00229915	1	1	-0.00351606
Chst2	0.106809	1	0.00776923	1	0.011409	1	1	0.0419958
Chsy1	0.018038	1	-0.097137	1	-0.0054095	1	1	-0.0281695
Chtf18	0.00777678	1	-0.0107953	1	-0.0149393	1	1	-0.00598591
Chtf8	0.00143979	1	-0.0399811	1	0.00834566	1	1	-0.0100652
Chtop	-0.0466089	1	0.174137	1	-0.0221339	1	1	0.0351314
Chuk	-0.0634774	1	0.112639	1	-0.0237339	1	1	0.00847599
Churc1	0.0256127	1	-0.228276	1	-0.0867235	1	1	-0.0964624
Ciao1	-0.0166888	1	-0.0772987	1	-0.010637	1	1	-0.0348748
Ciapin1	0.0701577	1	0.132711	1	-0.0413239	1	1	0.0538483
Ciart	-0.00633625	1	-0.0408904	1	0.000146236	1	1	-0.0156935
Cib1	0.00997783	1	-0.0659588	1	0.0066891	1	1	-0.0164306
Cib2	-0.0196777	1	-0.0238849	1	-0.037388	1	1	-0.0269835
Cic	-0.0559609	1	-0.100989	1	0.0358801	1	1	-0.0403566
Ciita	0.0408271	1	-0.0210501	1	-0.00669737	1	1	0.00435987
Cinp	-0.0122635	1	-0.12288	1	-0.00796471	1	1	-0.0477028
Cipc	0.00869068	1	-0.0159721	1	-0.0121721	1	1	-0.0064845
Cir1	-0.0142667	1	-0.0351223	1	-0.011424	1	1	-0.020271
Cirbp	-0.101446	1	-0.0357789	1	-0.018921	1	1	-0.0520487
Cisd1	-0.00800149	1	0.0315564	1	-0.0459638	1	1	-0.0074696
Cisd2	-0.0255821	1	0.0167122	1	-0.00690352	1	1	-0.00525779
Cisd3	0.0317738	1	-0.037615	1	-0.0249012	1	1	-0.0102475
Cish	-0.119142	1	-0.106777	1	0.055497	1	1	-0.0568075
Cit	0.0186474	1	-0.0184623	1	-0.023715	1	1	-0.00784331
Cited2	0.0560483	1	0.0555073	1	-0.0283929	1	1	0.0277209
Ciz1	0.0190839	1	-0.103836	1	0.050695	1	1	-0.0113524
Ckap2	0.0728797	1	-0.147108	1	0.180402	1	1	0.0353912
Ckap2l	0.0679004	1	0.0235814	1	0.0301343	1	1	0.0405387
Ckap4	0.0553818	1	0.0341483	1	0.11766	1	1	0.0690633
Ckap5	-0.0103097	1	-0.0431367	1	0.0379688	1	1	-0.00515921
Ckb	-0.0216192	1	0.029876	1	-0.00230903	1	1	0.0019826
Cklf	-0.014879	1	0.194327	1	0.0615518	1	1	0.0803332
Cks1b	0.290564	1	0.168473	1	0.0843021	1	1	0.181113
Cks1brt	0.00660975	1	-0.0203633	1	0.0132936	1	1	-0.000153306
Cks2	0.033837	1	-0.138426	1	-0.169729	1	1	-0.0914394
Clasp1	0.0114585	1	0.141071	1	-0.038975	1	1	0.0378514
Clasp2	-0.00490725	1	-0.0445881	1	-0.0367919	1	1	-0.0287624
Clasrp	-0.0218795	1	-0.0599377	1	-0.0224012	1	1	-0.0347395
Clca3a1	-0.0155479	1	-0.0232625	1	0.0199337	1	1	-0.00629221
Clcc1	-0.00353443	1	-0.0139	1	-0.0213142	1	1	-0.0129162
Clcf1	-0.227426	1.38522e-05	-0.138398	1	0.049474	1	0.00103562	-0.10545
Clcn2	0.00177371	1	-0.00665069	1	-0.0061556	1	1	-0.00367753
Clcn3	0.125136	1	-0.0982323	1	0.137198	1	1	0.0547005
Clcn4	-0.021838	1	-0.00214129	1	0.0211745	1	1	-0.000934901
Clcn5	-0.0012154	1	-0.0176217	1	0.0133502	1	1	-0.00182895
Clcn6	0.0132597	1	-0.0207672	1	-0.0100813	1	1	-0.00586294
Clcn7	-0.0123637	1	-0.020093	1	-0.00923103	1	1	-0.0138959
Cldn12	-0.0087131	1	-0.00297868	1	0.00275076	1	1	-0.00298034
Cldn23	0.0075817	1	0.0153283	1	0.0509293	1	1	0.0246131
Cldn3	0.333325	0.000324817	0.0819305	1	0.280531	1	0.0134119	0.231929
Cldn4	0.118709	1	0.112377	1	0.187851	1	1	0.139646
Cldn7	-0.277942	1	-0.116119	1	-0.338146	1	1	-0.244069
Cldnd1	0.0113848	1	0.0392438	1	0.078442	1	1	0.0430235
Clec11a	-0.00673318	1	0.000963685	1	0.00947808	1	1	0.0012362
Clec16a	0.0158654	1	-0.0213679	1	-0.00151262	1	1	-0.0023384
Clec2d	-0.00830038	1	0.0534083	1	0.00645635	1	1	0.0171881
Clec4d	-0.0471972	1	-0.061788	1	0.0146928	1	1	-0.0314308
Clec4e	-0.00798794	1	-0.0665352	1	0.112009	1	1	0.0124953
Clic1	0.165628	1	-0.132665	1	0.208235	1	1	0.0803993
Clic4	-0.0620924	1	-0.0685541	1	-0.0462869	1	1	-0.0589778
Clint1	0.0665997	1	-0.00373718	1	0.00495443	1	1	0.0226057
Clip1	0.0315814	1	-0.0346979	1	0.0904081	1	1	0.0290972
Clip2	-0.0498026	1	0.0138091	1	-0.0517355	1	1	-0.029243
Clip4	0.0496374	1	0.149555	1	0.0890128	1	1	0.0960685
Clk1	-0.132377	1	-0.0709686	1	-0.0802755	1	1	-0.0945404
Clk2	0.00699809	1	-0.08098	1	0.0417966	1	1	-0.0107285
Clk3	-0.0551038	1	-0.0386503	1	-0.0214657	1	1	-0.0384066
Clk4	-0.0811376	1	0.0163406	1	-0.0421997	1	1	-0.0356655
Cln3	-0.0153478	1	-0.0950158	1	0.0316056	1	1	-0.0262527
Cln5	0.0146032	1	-0.0241019	1	0.0466491	1	1	0.0123835
Cln6	-0.0205996	1	-0.0154294	1	0.0312775	1	1	-0.00158387
Cln8	-0.00250021	1	-0.118274	1	0.00990781	1	1	-0.0369554
Clns1a	-0.0260847	1	-0.181675	1	-0.0357812	1	1	-0.0811802
Clock	-0.0888775	1	-0.0367596	1	-0.032543	1	1	-0.0527267
Clp1	-0.0349531	1	-0.059604	1	-0.0219361	1	1	-0.0388311
Clpb	-0.00896519	1	0.00775058	1	0.00273582	1	1	0.000507068
Clpp	-0.0274951	1	0.0630958	1	-0.0280283	1	1	0.00252412
Clptm1	0.0176843	1	0.23659	1	0.050237	1	1	0.101504
Clptm1l	0.0372718	1	0.118962	1	-0.00521588	1	1	0.0503392
Clpx	-0.0665871	1	-0.142848	1	0.00975828	1	1	-0.0665588
Clspn	-0.0445635	1	-0.064493	1	-0.0390535	1	1	-0.04937
Clstn1	-0.0156082	1	-0.0558341	1	0.0405916	1	1	-0.0102836
Clta	-0.0559226	1	0.0313511	1	0.0228421	1	1	-0.000576464
Cltb	0.0799358	1	0.166888	1	0.0584969	1	1	0.101774
Cltc	-0.0338162	1	-0.0648552	1	0.122067	1	1	0.00779855
Clu	0.122115	1	0.167418	1	0.273004	1	1	0.187512
Cluap1	0.0575591	1	-0.0610894	1	0.021877	1	1	0.00611559
Cluh	-0.00291105	1	-0.0300788	1	-0.00248058	1	1	-0.0118235
Clybl	-0.0327374	1	-0.00870539	1	-0.00636705	1	1	-0.0159366
Cmas	-0.00226284	1	-0.0166547	1	-0.00643092	1	1	-0.00844948
Cmc1	-0.0429334	1	0.133639	1	-0.0543227	1	1	0.0121276
Cmc2	0.137083	1	-0.152133	1	0.104129	1	1	0.0296934
Cmc4	-0.00523348	1	-0.0130725	1	0.00165679	1	1	-0.00554974
Cmip	-0.0637359	1	0.00572766	1	0.033345	1	1	-0.0082211
Cmpk1	0.0858695	1	-0.127882	1	0.0277132	1	1	-0.00476633
Cmss1	-0.0241348	1	-0.106495	1	-0.0183338	1	1	-0.0496544
Cmtm3	-0.00313341	1	0.327685	1	-0.0713207	1	1	0.0844104
Cmtm4	0.0681838	1	0.0162431	1	0.0790592	1	1	0.0544954
Cmtm6	0.0318154	1	0.116591	1	0.034081	1	1	0.0608291
Cmtm7	0.0277318	1	-0.105266	1	-0.0253023	1	1	-0.034279
Cmtr1	-0.0199011	1	-0.00233533	1	0.00189465	1	1	-0.00678058
Cmtr2	-0.00803537	1	0.0444596	1	-0.00375655	1	1	0.0108892
Cnbp	0.020192	1	0.0468858	1	-0.0211138	1	1	0.0153214
Cndp2	0.0122567	1	-0.0542233	1	0.00306333	1	1	-0.0129678
Cnep1r1	0.0926144	1	0.00276672	1	0.00318508	1	1	0.0328554
Cnih1	0.0395078	1	0.00849016	1	0.0790952	1	1	0.0423644
Cnih4	0.196068	0.0864201	0.145226	1	0.0496822	1	0.557081	0.130325
Cnksr1	0.0219747	1	-0.0443131	1	0.0675439	1	1	0.0150685
Cnksr3	0.00994923	1	0.0154633	1	0.00446239	1	1	0.00995832
Cnn2	0.155347	1	-0.00311624	1	0.0273515	1	1	0.0598609
Cnn3	0.0460362	1	-0.0619174	1	-0.0349706	1	1	-0.0169506
Cnnm2	-0.00549948	1	0.0144574	1	-0.0180097	1	1	-0.00301726
Cnnm3	0.0215609	1	0.0453335	1	-0.0148692	1	1	0.0173417
Cnnm4	0.155101	0.0935372	0.00801217	1	0.09411	1	0.577725	0.085741
Cnot1	-0.0416333	1	-0.105414	1	0.0724926	1	1	-0.0248516
Cnot10	-0.0109858	1	-0.0711639	1	-0.0321093	1	1	-0.0380863
Cnot11	-0.00885152	1	-0.0550704	1	-0.00875381	1	1	-0.0242253
Cnot2	-0.0323744	1	0.145213	1	0.0454845	1	1	0.0527744
Cnot3	-0.0552637	1	0.0764256	1	0.0262487	1	1	0.0158035
Cnot4	-0.0483759	1	-0.0269779	1	-0.0173257	1	1	-0.0308932
Cnot6	0.0216649	1	0.0443001	1	0.0483835	1	1	0.0381162
Cnot6l	-0.0396907	1	0.295168	1	-0.0424135	1	1	0.0710213
Cnot7	0.00767769	1	0.243937	1	0.012093	1	1	0.0879027
Cnot8	-0.00838886	1	-0.00636954	1	-0.0397688	1	1	-0.0181757
Cnot9	0.000566707	1	-0.0308039	1	-0.0178102	1	1	-0.0160158
Cnp	-0.0382228	1	-0.157173	1	0.061053	1	1	-0.0447808
Cnppd1	0.0112047	1	-0.148596	1	-0.0127592	1	1	-0.0500503
Cnpy2	0.0882493	1	-0.0375457	1	-0.0486468	1	1	0.000685637
Cnpy3	-0.0874947	1	0.0305556	1	-0.0429286	1	1	-0.0332892
Cnpy4	-0.0244678	1	0.095411	1	-0.0521876	1	1	0.00625187
Cnst	0.0199975	1	-0.0249418	1	0.0267776	1	1	0.00727776
Cntrl	0.0206088	1	-0.0736564	1	-0.021028	1	1	-0.0246919
Cntrob	-0.0200313	1	-0.028732	1	-0.0169986	1	1	-0.0219206
Coa3	0.0213283	1	0.0429229	1	-0.0270947	1	1	0.0123855
Coa4	0.00652034	1	-0.0414798	1	-0.00806721	1	1	-0.0143422
Coa5	-0.0348739	1	-0.0493488	1	-0.0246532	1	1	-0.036292
Coa6	0.0243717	1	-0.0521367	1	-0.0438235	1	1	-0.0238628
Coa7	-0.0192823	1	-0.0112559	1	0.00168532	1	1	-0.00961764
Coasy	-0.000555087	1	-0.131929	1	-0.0056869	1	1	-0.0460569
Cobll1	-0.0286907	1	0.00829685	1	-0.0321937	1	1	-0.0175292
Cog1	-0.0249161	1	-0.0618956	1	0.00117472	1	1	-0.0285456
Cog2	0.00202831	1	-0.0474363	1	0.0239017	1	1	-0.00716877
Cog3	0.000281122	1	-0.0394285	1	0.00801702	1	1	-0.0103768
Cog4	0.00160754	1	-0.0526264	1	-0.0527242	1	1	-0.034581
Cog5	-0.00402655	1	0.00621598	1	0.0272525	1	1	0.00981398
Cog6	-0.00788175	1	0.0102146	1	0.011439	1	1	0.00459061
Cog7	-0.0208228	1	-0.100347	1	0.00915733	1	1	-0.0373376
Cog8	0.036578	1	0.17021	1	0.0225173	1	1	0.0764352
Coil	0.014354	1	-0.000273494	1	-0.0101823	1	1	0.00129941
Col12a1	-0.0528412	1	0.0106954	1	-0.0316427	1	1	-0.0245961
Col16a1	-0.0232226	1	-0.0723678	1	0.065039	1	1	-0.0101838
Col18a1	-0.319515	3.92259e-06	-0.158566	1	-0.232104	1	0.000356699	-0.236728
Col1a1	-0.0914659	1	-0.204906	1	-0.0325241	1	1	-0.109632
Col1a2	-0.0376395	1	-0.111812	1	0.246131	1	1	0.0322267
Col3a1	-0.0458641	1	0.00264333	1	-0.00637378	1	1	-0.0165315
Col4a1	0.0957009	1	0.160341	1	0.169092	1	1	0.141711
Col4a2	0.1023	1	-0.0278552	1	0.120501	1	1	0.064982
Col4a3bp	0.0625946	1	-0.130189	1	0.0944113	1	1	0.00893893
Col4a5	-0.0500097	1	-0.0329736	1	0.00231367	1	1	-0.0268899
Col5a1	-0.0240901	1	0.0768398	1	0.0280712	1	1	0.0269403
Col5a2	-0.0296689	1	-0.0972753	1	0.00682604	1	1	-0.0400394
Col6a1	-0.371185	0.0712133	-0.299361	1	-0.206843	1	0.507919	-0.292463
Col6a2	-0.119347	1	-0.0900303	1	-0.0604238	1	1	-0.0899337
Col7a1	0.0692339	1	-0.128499	1	0.0483691	1	1	-0.00363205
Col8a1	0.253201	0.238652	0.477127	1	-0.121734	1	0.825529	0.202865
Colgalt1	-0.0123059	1	0.00883309	1	-0.00580289	1	1	-0.00309188
Commd1	0.0382742	1	0.0679406	1	0.0124847	1	1	0.0395665
Commd10	0.00819058	1	-0.0121068	1	-0.0242924	1	1	-0.0094029
Commd2	0.0680922	1	-0.0640681	1	0.0271554	1	1	0.0103932
Commd3	0.082014	1	-0.0418438	1	0.0187383	1	1	0.0196361
Commd4	-0.0457563	1	-0.0511489	1	-0.0247591	1	1	-0.0405548
Commd6	0.0780392	1	0.0456926	1	0.0409258	1	1	0.0548858
Commd7	-0.0250534	1	-0.127164	1	-0.0453409	1	1	-0.0658526
Commd8	-0.0316231	1	0.0463324	1	0.00255319	1	1	0.00575415
Commd9	-0.0139187	1	0.14733	1	-0.000871391	1	1	0.0441798
Comt	0.0489684	1	-0.271849	1	0.0187342	1	1	-0.0680488
Comtd1	0.0479143	1	-0.0144043	1	0.0610262	1	1	0.031512
Cop1	0.0279957	1	0.0474735	1	-0.00855397	1	1	0.0223051
Copa	-0.0321288	1	0.0600649	1	0.0762932	1	1	0.0347431
Copb1	-0.0453534	1	-0.250511	1	0.100068	1	1	-0.0652652
Copb2	-0.0024339	1	-0.204264	1	-0.0304525	1	1	-0.0790502
Cope	0.180274	1	0.0600457	1	0.072733	1	1	0.104351
Copg1	-0.01709	1	0.122269	1	0.0448173	1	1	0.0499988
Copg2	-0.0520641	1	-0.0821919	1	-0.0141714	1	1	-0.0494758
Coprs	-0.0371588	1	-0.0817937	1	-0.0148241	1	1	-0.0445922
Cops2	-0.00830721	1	0.1963	1	-0.0133234	1	1	0.0582232
Cops3	0.0176496	1	-0.104716	1	-0.0487365	1	1	-0.0452675
Cops4	-0.039284	1	0.00999684	1	0.0133584	1	1	-0.0053096
Cops5	0.0712671	1	-0.00938798	1	0.0376852	1	1	0.0331881
Cops6	-0.0575393	1	-0.145209	1	-0.0690684	1	1	-0.0906057
Cops7a	0.029273	1	0.0216518	1	-0.00832662	1	1	0.0141994
Cops7b	-0.0220957	1	0.00760923	1	0.0127703	1	1	-0.000572049
Cops8	-0.0319138	1	-0.102575	1	-0.116688	1	1	-0.0837256
Cops9	0.0185327	1	0.0641518	1	0.0182392	1	1	0.0336413
Copz1	-0.015549	1	-0.0404199	1	0.0739526	1	1	0.00599456
Copz2	0.00635791	1	-0.0212155	1	-0.00683212	1	1	-0.00722991
Coq10a	0.000684223	1	-0.0353323	1	-0.0168083	1	1	-0.0171521
Coq10b	-0.0504247	1	-0.0520014	1	-0.0128076	1	1	-0.0384112
Coq2	-0.0183273	1	-0.0401171	1	-0.0357458	1	1	-0.0313968
Coq3	0.0447992	1	0.0886824	1	-0.0083785	1	1	0.041701
Coq4	-0.0126003	1	-0.0376774	1	-0.0304867	1	1	-0.0269215
Coq5	-0.0154257	1	-0.0602005	1	-0.0441668	1	1	-0.039931
Coq6	-0.0165246	1	0.00537116	1	-0.0046568	1	1	-0.00527009
Coq7	0.0124679	1	-0.137282	1	-0.0615442	1	1	-0.0621195
Coq8b	-0.00127861	1	-0.0361225	1	-0.0238796	1	1	-0.0204269
Coq9	-0.0143941	1	0.0181934	1	-0.0190218	1	1	-0.00507418
Coro1a	0.000743529	1	-0.108641	1	0.00411398	1	1	-0.0345944
Coro1b	-0.0155445	1	-0.123117	1	0.0704742	1	1	-0.0227291
Coro1c	-0.0296527	1	-0.128299	1	-0.0336589	1	1	-0.0638701
Coro2a	0.0139741	1	0.100135	1	0.0105238	1	1	0.0415442
Coro6	-0.0119522	1	0.0191748	1	-0.0333615	1	1	-0.00871295
Coro7	-0.015162	1	-0.024415	1	-0.00146113	1	1	-0.0136794
Cotl1	0.184344	1	0.248453	1	0.158608	1	1	0.197135
Cox10	-0.0359726	1	-0.0311953	1	-0.017049	1	1	-0.0280723
Cox11	-0.0062585	1	0.0504134	1	-0.0511305	1	1	-0.00232519
Cox14	0.028096	1	0.0601059	1	-0.0100081	1	1	0.0260646
Cox15	-0.0227537	1	-0.0617739	1	-0.0149802	1	1	-0.0331693
Cox16	0.0212574	1	0.0616483	1	0.000851831	1	1	0.0279192
Cox17	0.0288506	1	-0.111617	1	0.0928771	1	1	0.00337032
Cox18	0.108245	1	0.132063	1	0.00316722	1	1	0.0811583
Cox19	-0.00468507	1	-0.0237111	1	-0.0196938	1	1	-0.01603
Cox20	0.144504	1	0.27418	1	0.0649575	1	1	0.161214
Cox4i1	0.26003	4.80446e-10	-0.0867751	1	0.209336	0.118818	1.72826e-08	0.12753
Cox5a	0.0720513	1	-0.0109883	1	-0.0207645	1	1	0.0134328
Cox5b	0.0155089	1	-0.231695	1	-0.0413827	1	1	-0.0858564
Cox6a1	0.0238174	1	-0.0317875	1	-0.0633573	1	1	-0.0237758
Cox6b1	0.0867299	1	0.182216	1	-0.00470805	1	1	0.0880794
Cox6c	-0.0451116	1	0.00074582	1	0.0578931	1	1	0.0045091
Cox7a2	0.00262689	1	-0.00965584	1	-0.109306	1	1	-0.0387783
Cox7a2l	-0.0556318	1	-0.153462	1	-0.0286584	1	1	-0.0792506
Cox7b	0.0301248	1	0.011173	1	0.0683891	1	1	0.0365623
Cox7c	0.0522955	1	0.231881	1	-0.0491979	1	1	0.0783261
Cox8a	-0.152695	1	-0.271994	1	-0.103229	1	1	-0.175973
Cp	-0.164516	1	-0.0395428	1	-0.403395	1	1	-0.202485
Cpd	0.0100515	1	-0.0622938	1	0.131898	1	1	0.0265519
Cpe	0.144668	1	0.223472	1	0.0213469	1	1	0.129829
Cpeb2	-0.00773528	1	0.129371	1	0.054102	1	1	0.0585791
Cpeb4	-0.0317923	1	-0.0398415	1	0.00779174	1	1	-0.0212807
Cpne2	-0.00104444	1	0.091106	1	-0.0231191	1	1	0.0223142
Cpne3	0.0548645	1	-0.168011	1	0.0686134	1	1	-0.0148445
Cpne8	-0.0763022	1	-0.0108914	1	-0.0883714	1	1	-0.0585217
Cpox	0.0741011	1	0.0102626	1	0.0108144	1	1	0.031726
Cpped1	0.0582662	1	-0.00222601	1	-0.00302946	1	1	0.0176703
Cpq	-0.0557658	1	0.00323963	1	-0.0478771	1	1	-0.0334678
Cpsf1	-0.0197308	1	-0.0689661	1	-0.0260985	1	1	-0.0382651
Cpsf2	-0.0613142	1	-0.00759349	1	0.0351957	1	1	-0.0112373
Cpsf3	-0.0180486	1	-0.0845118	1	-0.0296976	1	1	-0.044086
Cpsf4	-0.0142825	1	0.0354689	1	0.00368429	1	1	0.00829021
Cpsf6	-0.0438391	1	0.21873	1	0.03232	1	1	0.0690703
Cpsf7	-0.0393245	1	0.0242379	1	-0.0435702	1	1	-0.0195523
Cpt1a	-0.0594108	1	-0.0414739	1	0.0355203	1	1	-0.0217881
Cpt2	-0.0089245	1	0.0143609	1	0.0216458	1	1	0.00902738
Cptp	0.00118608	1	-0.0392177	1	-0.0143101	1	1	-0.0174472
Cr1l	0.0741647	1	0.066743	1	-0.0108366	1	1	0.0433571
Cracr2b	-0.0216334	1	-0.000962386	1	0.00919059	1	1	-0.00446839
Cradd	0.0347057	1	-0.00444549	1	0.0312049	1	1	0.0204884
Cramp1l	-0.0358831	1	-0.00739986	1	-0.0578811	1	1	-0.0337214
Crat	-0.00783795	1	0.0660451	1	-0.0148828	1	1	0.0144414
Crbn	-0.00904772	1	-0.0837186	1	0.00612005	1	1	-0.0288821
Crcp	0.0769891	1	-0.078277	1	0.0214939	1	1	0.00673536
Creb1	0.0191835	1	-0.0740235	1	-0.0177045	1	1	-0.0241815
[truncated: 8,460 more rows]

## Sheet: Clone350_FindMarkers_by_expt
gene	logFC.Veh.ExptC	adj.p.Veh.ExptC	logFC.Veh.ExptD	adj.p.Veh.ExptD	logFC.Veh.ExptA	adj.p.Veh.ExptA	logFC.Veh.ExptB	adj.p.Veh.ExptB	fisher.combined.pvalue	mean.logFC
0610009B22Rik	0.0117954	1	-0.0750954	1	0.0246349	1	-0.0177259	1	1	-0.0140977
0610009O20Rik	-0.000782395	1	0.0297511	1	0.00973969	1	-0.0244586	1	1	0.00356246
0610010F05Rik	-0.00954113	1	-0.0132571	1	0.00941018	1	-0.0244987	1	1	-0.00947167
0610010K14Rik	0.0672939	1	-0.0322901	1	-0.00791547	1	-0.127492	1	1	-0.0251009
0610012G03Rik	0.0844893	1	0.0542681	1	0.00813618	1	0.0438329	1	1	0.0476816
0610030E20Rik	0.00409943	1	-0.012428	1	-0.00764453	1	-0.0248147	1	1	-0.010197
0610037L13Rik	-0.0430076	1	-0.0452137	1	-0.0489079	1	-0.0707971	1	1	-0.0519816
0610040B10Rik	-0.00265005	1	-0.0106795	1	2.97844e-06	1	0.0200126	1	1	0.00167149
1110002L01Rik	-0.00481441	1	-0.00441964	1	-0.00446077	1	-0.0182873	1	1	-0.00799552
1110004E09Rik	-0.0434892	1	0.0389446	1	0.0193381	1	0.0784826	1	1	0.023319
1110004F10Rik	0.0225992	1	0.12309	1	0.0538265	1	0.0415331	1	1	0.0602621
1110008F13Rik	0.063939	1	-0.096874	1	-0.0163249	1	-0.0642585	1	1	-0.0283796
1110008L16Rik	0.0260969	1	0.00172901	1	0.00119477	1	0.00777964	1	1	0.00920007
1110008P14Rik	0.0453201	1	-0.0667687	1	-0.193919	1	-0.302851	1	1	-0.129555
1110012L19Rik	0.0344621	1	0.0106094	1	-0.00680639	1	0.000146394	1	1	0.00960288
1110019D14Rik	-0.00395258	1	0.00336153	1	-0.00305579	1	-0.00711031	1	1	-0.00268928
1110032A03Rik	0.0311456	1	-0.0992101	1	-0.00422229	1	-0.000120605	1	1	-0.0181019
1110034G24Rik	0.00177387	1	-0.00498935	1	-0.00693096	1	-0.0371346	1	1	-0.0118203
1110038F14Rik	0.102044	1	0.0741808	1	0.116528	1	0.139329	1	1	0.10802
1110046J04Rik	0.0369947	1	0.0422887	1	0.0167119	1	0.00727906	1	1	0.0258186
1110059E24Rik	0.0182008	1	0.0461584	1	0.0267751	1	-0.042629	1	1	0.0121263
1110059G10Rik	-0.000529269	1	-0.063779	1	-0.00639162	1	-0.0647233	1	1	-0.0338558
1110065P20Rik	-0.0139994	1	-0.0157759	1	0.0044207	1	0.0392036	1	1	0.00346227
1190002N15Rik	-0.0268165	1	-0.0174849	1	-0.0270027	1	-0.0118197	1	1	-0.0207809
1190005I06Rik	-0.0158681	1	-0.0299749	1	-0.0537429	1	0.0498996	1	1	-0.0124216
1190007I07Rik	-0.00419381	1	0.0221081	1	0.0424611	1	0.0163299	1	1	0.0191763
1300002E11Rik	0.0805466	1	0.0280333	1	0.00482106	1	0.118942	1	1	0.0580857
1500011B03Rik	0.0349284	1	-0.0413683	1	0.0235409	1	-0.00605932	1	1	0.00276043
1500011K16Rik	-0.0220236	1	-0.148482	1	-0.0577424	1	-0.0600358	1	1	-0.072071
1600002K03Rik	-0.0354104	1	0.0556308	1	-0.00843683	1	-0.0106507	1	1	0.000283221
1600012H06Rik	0.00991601	1	0.0116781	1	-0.00451257	1	0.0158037	1	1	0.00822131
1600014C10Rik	0.000372204	1	0.00349812	1	-0.00618272	1	-0.0136308	1	1	-0.00398581
1600020E01Rik	-0.0021195	1	-0.00543167	1	-0.00856276	1	-0.0178293	1	1	-0.00848582
1700006J14Rik	-0.0186956	1	0.0105181	1	-0.000684029	1	-0.00901035	1	1	-0.00446796
1700008J07Rik	0.0244939	1	-0.00110018	1	0.00510027	1	0.00413447	1	1	0.00815711
1700017B05Rik	-0.00601278	1	-0.0609204	1	-0.0218732	1	-0.00269061	1	1	-0.0228743
1700019L13Rik	-0.0235008	1	0.00446832	1	0.00453491	1	-0.0110994	1	1	-0.00639924
1700020I14Rik	-0.0358638	1	0.0171265	1	-0.00589042	1	-0.0806796	1	1	-0.0263268
1700021F05Rik	-0.0290285	1	-0.00297952	1	-0.00207196	1	0.0138882	1	1	-0.00504795
1700025G04Rik	-0.0262111	1	0.00408947	1	0.000267109	1	-0.0022648	1	1	-0.00602983
1700030K09Rik	-0.0157577	1	-0.00457073	1	-0.00435014	1	0.213933	1	1	0.0473136
1700037C18Rik	-0.00990511	1	0.0245307	1	0.00983016	1	0.00195681	1	1	0.00660314
1700037H04Rik	0.0275566	1	-0.0336125	1	0.0197034	1	-0.0692368	1	1	-0.0138973
1700052K11Rik	0.0131705	1	-0.0636342	1	0.00132314	1	-0.00943909	1	1	-0.0146449
1700056E22Rik	0.0121754	1	0.00100255	1	-0.0091347	1	-0.0183582	1	1	-0.00357873
1700086O06Rik	0.00978923	1	-0.0104656	1	-0.000667753	1	-0.0132288	1	1	-0.00364324
1700088E04Rik	-0.00841204	1	-0.00811576	1	-0.0157916	1	0.101295	1	1	0.017244
1700096K18Rik	-0.00274717	1	0.00820682	1	0.000638678	1	-0.00112236	1	1	0.00124399
1700109H08Rik	0.0129611	1	-0.00806032	1	-0.00352103	1	-0.0105378	1	1	-0.00228951
1700113A16Rik	0.00871732	1	0.00176676	1	-0.00667544	1	0.0684817	1	1	0.0180726
1700123O20Rik	0.0681835	1	0.0253009	1	-0.00125835	1	0.0710327	1	1	0.0408147
1810009A15Rik	0.0302494	1	-0.0420821	1	0.0202047	1	0.00251673	1	1	0.00272218
1810013L24Rik	0.0623628	1	0.0169382	1	-0.014809	1	-0.0641517	1	1	8.50555e-05
1810022K09Rik	-0.0184906	1	-0.0378203	1	-0.0259694	1	-0.0464819	1	1	-0.0321906
1810030O07Rik	0.000466192	1	0.0113789	1	-0.0104827	1	-0.0600356	1	1	-0.0146683
1810032O08Rik	0.0773904	1	0.0325789	1	-0.0412425	1	0.0369186	1	1	0.0264113
1810037I17Rik	0.0576674	1	-0.0180628	1	0.00690782	1	0.0036444	1	1	0.0125392
1810043G02Rik	-0.0317579	1	-0.0374464	1	0.00709949	1	-0.00855795	1	1	-0.0176657
1810044D09Rik	0.00430384	1	-0.0115552	1	-0.00202561	1	-0.00863333	1	1	-0.00447759
1810055G02Rik	0.0478839	1	-0.00613311	1	-0.00186302	1	-0.0729611	1	1	-0.00826832
1810058I24Rik	-0.00537419	1	0.00305924	1	-0.00817369	1	-0.0352475	1	1	-0.011434
1810062G17Rik	0.00857615	1	-0.0174627	1	0.00577741	1	-0.00334301	1	1	-0.00161305
2010107E04Rik	0.00687828	1	-0.0115095	1	-0.0403341	1	0.0819494	1	1	0.00924601
2010111I01Rik	-0.0138071	1	0.0482867	1	-0.0202998	1	-0.0368122	1	1	-0.00565809
2010300F17Rik	-0.0469441	1	0.107941	1	0.0385236	1	0.101456	1	1	0.0502441
2010315B03Rik	-0.00996087	1	-0.00102787	1	-0.00645696	1	0.0836133	1	1	0.0165419
2010320M18Rik	0.00370453	1	0.0196163	1	-0.0549278	1	-0.0422787	1	1	-0.0184714
2200002D01Rik	0.153282	1	0.0520918	1	0.064906	1	0.0619079	1	1	0.083047
2210016L21Rik	-0.0763685	1	0.0319963	1	0.0584137	1	-0.0661258	1	1	-0.0130211
2210408I21Rik	0.0151106	1	0.0317513	1	-0.00787537	1	-0.0286118	1	1	0.00259369
2300009A05Rik	0.0831791	1	-0.0321048	1	0.00313901	1	-0.0148345	1	1	0.0098447
2310001H17Rik	0.0240015	1	-0.0167329	1	-0.000514758	1	-0.0195945	1	1	-0.00321018
2310009B15Rik	0.07717	1	0.0394747	1	0.00622373	1	-0.0440725	1	1	0.019699
2310011J03Rik	-0.017711	1	-0.0213191	1	-0.0049759	1	-0.0772621	1	1	-0.030317
2310022A10Rik	0.03834	1	-0.0112875	1	0.0105952	1	0.0358525	1	1	0.018375
2310022B05Rik	0.0470167	1	0.0396319	1	-0.0280556	1	-0.0244695	1	1	0.00853086
2310030G06Rik	-0.0244608	1	-0.0251745	1	-0.0310936	1	-0.0127665	1	1	-0.0233739
2310033P09Rik	0.0249157	1	0.0319234	1	0.00926872	1	-0.021308	1	1	0.0112
2310035C23Rik	0.00969452	1	0.00127695	1	0.017709	1	-0.0155827	1	1	0.00327444
2310039H08Rik	0.102636	1	-0.0426979	1	-0.0205818	1	0.0206949	1	1	0.0150128
2310057M21Rik	0.0141332	1	-0.00999227	1	-0.0117401	1	0.0176395	1	1	0.00251009
2310061I04Rik	-0.00953006	1	0.0317444	1	-0.0277083	1	-0.0133841	1	1	-0.00471951
2410002F23Rik	0.0420366	1	-0.028762	1	-0.000226514	1	-0.0424767	1	1	-0.00735715
2410004B18Rik	0.0340819	1	0.0606078	1	0.0179229	1	0.0354597	1	1	0.0370181
2410015M20Rik	-0.0319081	1	-0.0288674	1	-0.00840553	1	0.135385	1	1	0.0165511
2410089E03Rik	0.0550678	1	0.0353908	1	-0.0705409	1	-0.0163685	1	1	0.000887297
2410131K14Rik	0.017761	1	0.00105043	1	-0.0286395	1	-0.0238208	1	1	-0.00841221
2510002D24Rik	-0.00416829	1	0.0215695	1	0.0346419	1	-0.0331633	1	1	0.00471995
2510017J16Rik	-0.0134644	1	-0.00184885	1	-0.0112668	1	-0.00474627	1	1	-0.00783159
2510039O18Rik	0.0156674	1	-0.00880557	1	0.0126305	1	-0.0258663	1	1	-0.0015935
2510046G10Rik	0.00374215	1	0.00681298	1	0.0122353	1	-0.0162718	1	1	0.00162966
2610001J05Rik	-0.00641551	1	-0.0634879	1	-0.0150985	1	0.108959	1	1	0.00598922
2610002M06Rik	-0.027852	1	0.00584783	1	0.0106615	1	0.0171608	1	1	0.00145455
2610008E11Rik	-0.0325242	1	0.0132419	1	-0.0415225	1	-0.0334167	1	1	-0.0235554
2610020C07Rik	0.0263758	1	-0.00185485	1	0.0141324	1	0.0122012	1	1	0.0127136
2610021A01Rik	0.0206135	1	0.0280678	1	-0.00328934	1	-0.000854824	1	1	0.0111343
2610037D02Rik	-0.0189529	1	0.0065638	1	-0.0244682	1	-0.01974	1	1	-0.0141493
2610044O15Rik8	0.00739222	1	0.027851	1	-0.0222187	1	-0.0181203	1	1	-0.00127393
2610301B20Rik	-0.0076079	1	0.0102808	1	-0.00919513	1	0.134753	1	1	0.0320576
2610507B11Rik	0.0149831	1	-0.0318454	1	0.00734539	1	-0.0526788	1	1	-0.0155489
2700016F22Rik	-0.00356039	1	0.0844833	1	-0.00131348	1	0.01233	1	1	0.0229849
2700038G22Rik	0.00523461	1	-0.00466312	1	-0.00675536	1	0.0417765	1	1	0.00889816
2700049A03Rik	-0.0176411	1	0.000865049	1	0.00766868	1	-0.0171841	1	1	-0.00657286
2700062C07Rik	0.00958626	1	-0.0123504	1	0.0351776	1	-0.0280816	1	1	0.00108299
2700081O15Rik	0.127886	1	0.0605217	1	-0.039238	1	-0.0745247	1	1	0.0186613
2700097O09Rik	0.00429537	1	0.0222876	1	-0.0322276	1	-0.0334578	1	1	-0.0097756
2810001G20Rik	0.0489156	1	-0.00360496	1	-0.00384133	1	-0.00638705	1	1	0.00877057
2810004N23Rik	-0.03973	1	-0.144877	1	-0.0460787	1	-0.0664424	1	1	-0.0742821
2810006K23Rik	-0.00283625	1	-0.00162412	1	-0.0123238	1	0.11708	1	1	0.025074
2810402E24Rik	-0.0010318	1	0.0350688	1	-0.0115764	1	-0.029237	1	1	-0.00169409
2810403A07Rik	0.0133795	1	0.107788	1	-0.0150632	1	-0.0132143	1	1	0.0232225
2810408A11Rik	0.00273512	1	0.0567093	1	0.00816277	1	0.00734659	1	1	0.0187384
2810454H06Rik	-0.0113159	1	-0.0352564	1	0.0587445	1	-0.0247351	1	1	-0.00314073
2810457G06Rik	-0.00779877	1	0.0353297	1	-0.000366558	1	0.00901895	1	1	0.00904583
2810474O19Rik	-0.0575307	1	0.127073	1	-0.0604259	1	-0.0392577	1	1	-0.00753545
2900009J06Rik	0.0556085	1	-0.00446218	1	-0.000787707	1	-0.0123696	1	1	0.00949725
2900026A02Rik	0.031248	1	0.0527946	1	0.00436928	1	-0.0347999	1	1	0.013403
2900060B14Rik	0.0440833	1	0.0422613	1	-0.000278354	1	0.0143867	1	1	0.0251132
2900076A07Rik	0.0230749	1	0.00411586	1	0.0148183	1	0.00051369	1	1	0.0106307
2900093K20Rik	-0.00659616	1	-0.00902421	1	-0.00335246	1	0.0630267	1	1	0.0110135
2900097C17Rik	0.016104	1	-0.0302249	1	-0.0687977	1	0.0517405	1	1	-0.00779453
3010003L21Rik	-0.0228482	1	0.0134457	1	-0.0125871	1	-0.0276811	1	1	-0.0124177
3110002H16Rik	-0.0327373	1	-0.00958852	1	-0.0166685	1	0.0103491	1	1	-0.0121613
3110009E18Rik	0.0390754	1	0.00577737	1	0.0194221	1	0.0444811	1	1	0.027189
3110040N11Rik	0.0808565	1	0.0689435	1	-0.0157177	1	0.0130967	1	1	0.0367948
3110043O21Rik	-0.0546326	1	0.00160773	1	-0.067147	1	0.0980539	1	1	-0.0055295
3110062M04Rik	0.0155806	1	0.0208246	1	0.00180773	1	-0.00464433	1	1	0.00839215
3110082I17Rik	0.0150808	1	-0.0147272	1	0.0152754	1	-0.0139315	1	1	0.000424385
3300005D01Rik	0.0137393	1	-0.0343188	1	-0.0105196	1	-0.109541	1	1	-0.03516
3830406C13Rik	0.0267946	1	0.00628402	1	0.0142137	1	0.0103547	1	1	0.0144118
4632415L05Rik	-0.00840355	1	0.010807	1	0.0173868	1	0.00802213	1	1	0.00695309
4732491K20Rik	0.0147924	1	0.0205529	1	-0.000961554	1	0.0178353	1	1	0.0130548
4833418N02Rik	-0.00666813	1	0.0105935	1	-0.0138699	1	0.00218052	1	1	-0.00194101
4833420G17Rik	0.00733149	1	0.0900464	1	-0.0286062	1	0.000556007	1	1	0.0173319
4833439L19Rik	-0.00418345	1	-0.0204935	1	-0.0129296	1	0.0450058	1	1	0.00184983
4921524J17Rik	-0.0592028	1	-0.0169163	1	-0.0141104	1	-0.163813	1	1	-0.0635106
4930402H24Rik	-0.00699815	1	0.00960834	1	-0.00451276	1	-0.0110653	1	1	-0.00324198
4930430F08Rik	-0.0116391	1	0.00457171	1	-0.0185869	1	0.00381011	1	1	-0.00546104
4930453N24Rik	-0.0148123	1	0.038607	1	0.0239274	1	0.00686195	1	1	0.013646
4930471E19Rik	0.0102688	1	0.0299441	1	-0.00124288	1	0.000774682	1	1	0.00993618
4930503L19Rik	-0.0282445	1	0.0352039	1	0.0038982	1	0.0103482	1	1	0.00530146
4930522L14Rik	0.031483	1	0.00442818	1	0.0169863	1	-0.00109549	1	1	0.0129505
4930523C07Rik	-0.161214	1	-0.0610358	1	-0.159414	1	-0.125432	1	1	-0.126774
4930579C12Rik	-0.0778786	1	-0.108152	1	0.0136867	1	0.126096	1	1	-0.0115619
4930579G24Rik	0.0061008	1	-0.0169111	1	0.0171295	1	-0.00317178	1	1	0.000786873
4931406C07Rik	0.0252688	1	-0.0763928	1	0.000757473	1	-0.061446	1	1	-0.0279531
4931406P16Rik	-0.0002342	1	0.070818	1	0.0143623	1	0.00191973	1	1	0.0217164
4931428F04Rik	-0.0210216	1	-0.00430796	1	-0.00742358	1	-0.00908183	1	1	-0.0104587
4932422M17Rik	-0.095018	1	-0.0281984	1	-0.0216796	1	-0.00563586	1	1	-0.037633
4932438A13Rik	-0.035913	1	0.0332382	1	0.0177779	1	0.0499733	1	1	0.0162691
4933404O12Rik	0.00779581	1	0.0192805	1	0.00495935	1	-0.0140479	1	1	0.00449693
4933427D14Rik	0.00767839	1	0.0416746	1	-0.00976436	1	0.00876741	1	1	0.012089
4933434E20Rik	0.0584314	1	0.00095421	1	-0.00203833	1	0.0303952	1	1	0.0219356
5031425E22Rik	0.00993731	1	-0.0134938	1	-0.0917425	1	-0.126116	1	1	-0.0553538
5031439G07Rik	0.0267386	1	0.058032	1	0.0143097	1	-0.0203407	1	1	0.0196849
5033406O09Rik	0.0153185	1	-0.0232285	1	0.00116966	1	0.00569794	1	1	-0.00026061
5033430I15Rik	-0.00888129	1	0.0790001	1	-0.00872167	1	-0.0103638	1	1	0.0127584
5430403G16Rik	0.00293972	1	0.000981461	1	0.00101156	1	-0.00859407	1	1	-0.000915334
5430416N02Rik	0.00781173	1	0.10855	1	-0.0521571	1	-0.054915	1	1	0.00232243
5730409E04Rik	0.000603856	1	-0.00841564	1	0.00444638	1	0.0105664	1	1	0.00180026
5730455P16Rik	-0.0016496	1	-0.0131652	1	-0.00531495	1	-0.023411	1	1	-0.0108852
5730480H06Rik	-0.0216779	1	-0.0340064	1	-0.00397373	1	0.0253549	1	1	-0.0085758
5730559C18Rik	0.0160105	1	0.0275382	1	-0.0188649	1	-0.0167922	1	1	0.00197288
5930430L01Rik	0.0222369	1	-0.00126328	1	0.000307403	1	0.00293443	1	1	0.00605386
6030458C11Rik	0.0129854	1	-0.0080617	1	0.00089674	1	0.0339633	1	1	0.00994594
6330403L08Rik	0.0217751	1	0.00244677	1	-0.00733275	1	0.00271662	1	1	0.00490144
6330562C20Rik	-0.00584412	1	-0.00415516	1	0.00787101	1	-0.00287939	1	1	-0.00125191
6720489N17Rik	0.010168	1	-0.0170887	1	0.00453292	1	0.0122419	1	1	0.00246356
8030462N17Rik	-0.00639399	1	0.0106283	1	-0.00656999	1	-0.0107431	1	1	-0.0032697
8430423G03Rik	0.00318525	1	-0.0245022	1	-0.0007944	1	0.0234425	1	1	0.000332781
9030025P20Rik	0.0133815	1	0.0139953	1	0.0124419	1	-0.0225078	1	1	0.00432772
9030624J02Rik	0.0291214	1	0.0539981	1	0.00456157	1	0.0374094	1	1	0.0312726
9130008F23Rik	0.0131777	1	-0.00385267	1	-0.0194022	1	0.0068664	1	1	-0.000802698
9130401M01Rik	-0.0265712	1	-0.0598998	1	0.0331889	1	-0.0211297	1	1	-0.018603
9230102O04Rik	0.0111819	1	-0.0350269	1	-0.00974326	1	-0.00506515	1	1	-0.00966335
9230110C19Rik	0.00407367	1	-0.00114869	1	0.00361786	1	-0.0215235	1	1	-0.00374515
9330020H09Rik	-0.00171655	1	0.0104732	1	-0.000836127	1	-0.0062525	1	1	0.000417015
9330175E14Rik	0.00633925	1	0.0188203	1	-0.00337398	1	-0.039626	1	1	-0.00446011
9430015G10Rik	0.00636853	1	0.00537619	1	-0.0123793	1	0.0144828	1	1	0.00346205
9430037G07Rik	-0.0262381	1	-0.00376406	1	-0.00717556	1	-0.0605901	1	1	-0.024442
9430038I01Rik	0.0411594	1	0.000611642	1	-0.0152228	1	0.0024755	1	1	0.00725594
9530068E07Rik	0.106386	1	-0.0168488	1	0.0117882	1	-0.0186456	1	1	0.0206699
9530077C05Rik	0.0101684	1	0.00939384	1	0.00144362	1	-0.0194466	1	1	0.000389823
9530082P21Rik	-0.0242947	1	0.0384482	1	0.0139956	1	-0.0243585	1	1	0.000947633
9930021J03Rik	0.0437784	1	0.0434935	1	0.0175862	1	-0.0680277	1	1	0.00920761
9930111J21Rik2	-0.0554013	1	0.0459254	1	0.00610728	1	0.00481648	1	1	0.000361952
A130010J15Rik	-0.000371538	1	-0.000393723	1	0.00037059	1	0.00779342	1	1	0.00184969
A130051J06Rik	-0.0129413	1	-0.0136186	1	-0.0112754	1	-0.0154383	1	1	-0.0133184
A230050P20Rik	0.0148523	1	0.0553333	1	0.0748087	0.0020399	0.131377	1	0.134644	0.0690927
A330069E16Rik	0.0334297	1	-0.00550833	1	-0.00696295	1	-0.0349671	1	1	-0.00350216
A330074K22Rik	-0.00212625	1	-0.010096	1	0.00425893	1	-0.0137982	1	1	-0.00544038
A430005L14Rik	0.00354932	1	0.0298949	1	0.00198345	1	-0.0158284	1	1	0.00489983
A430105I19Rik	-0.00950649	1	-0.00211542	1	0.0107472	1	0.00174744	1	1	0.000218186
A530017D24Rik	0.00147796	1	0.00788256	1	0.00188813	1	-0.0017715	1	1	0.00236929
A630001G21Rik	-0.00108872	1	0.0223388	1	-0.000959855	1	-0.0194373	1	1	0.000213239
A630072M18Rik	-0.00368382	1	0.0069301	1	-0.00523493	1	-0.0200137	1	1	-0.00550059
A630089N07Rik	0.0011359	1	-0.000934188	1	-0.00649308	1	0.00438869	1	1	-0.000475672
A830010M20Rik	-0.00932305	1	-2.23202e-05	1	-0.00368539	1	0.00582141	1	1	-0.00180234
A830082K12Rik	0.0325294	1	0.0752408	1	0.0159646	1	-0.00337052	1	1	0.0300911
A930004D18Rik	0.00302121	1	-0.0165806	1	0.00624372	1	0.00350002	1	1	-0.000953909
A930015D03Rik	0.0365569	1	-0.0409935	1	0.00077421	1	-0.0280542	1	1	-0.00792913
AA467197	-0.0218675	1	0.209552	1	0.257464	5.51059e-09	0.289306	1	7.42275e-06	0.183613
Aaas	-0.0109259	1	0.00918813	1	0.00390903	1	-0.0606286	1	1	-0.0146143
Aacs	0.0185333	1	-0.029109	1	-0.00138057	1	-0.0275836	1	1	-0.00988496
Aaed1	-0.00276134	1	0.0813986	1	0.014981	1	-0.00812579	1	1	0.0213731
Aagab	0.020355	1	-0.00352592	1	0.00949587	1	-0.0115179	1	1	0.00370175
Aak1	0.037731	1	0.041651	1	-0.0289563	1	-0.0254193	1	1	0.00625158
Aamdc	0.0175425	1	0.0492715	1	-0.028345	1	-0.0379368	1	1	0.000133063
Aamp	0.125673	1	-0.0124936	1	0.0575362	1	0.115529	1	1	0.0715613
Aar2	0.00551822	1	-0.0129881	1	0.00299023	1	-0.00781314	1	1	-0.00307319
Aars	-0.0868519	1	0.182298	1	-0.0496055	1	-0.0735963	1	1	-0.00693889
Aars2	0.00187132	1	0.0166508	1	-0.0112321	1	-0.0180673	1	1	-0.0026943
Aarsd1	0.014467	1	-0.0122026	1	-0.00455285	1	0.00283627	1	1	0.000136956
Aasdh	0.00304644	1	-0.00425795	1	-0.0048784	1	-0.00877513	1	1	-0.00371626
Aasdhppt	0.0177424	1	-0.00676463	1	0.0433714	1	0.00250204	1	1	0.0142128
Aatf	0.0316987	1	-0.000469998	1	-0.0163214	1	-0.0575341	1	1	-0.0106567
Aatk	0.00492234	1	-0.0199017	1	-0.00959841	1	-0.0116844	1	1	-0.00906553
Abca2	0.0182618	1	0.00947089	1	0.00325314	1	-0.0156673	1	1	0.00382963
Abca3	0.0152389	1	0.00485379	1	0.00570789	1	-0.022601	1	1	0.000799901
Abca7	-0.0191975	1	0.0113114	1	0.0072123	1	-0.0161725	1	1	-0.00421158
Abcb10	-0.0171463	1	-0.00793202	1	-0.0179414	1	-0.00854029	1	1	-0.01289
Abcb1a	-0.0455865	1	-0.00607119	1	0.00101206	1	0.00255405	1	1	-0.0120229
Abcb1b	-0.0943005	1	0.0257834	1	0.0153881	1	0.108889	1	1	0.01394
Abcb7	-0.00140339	1	0.00960872	1	-0.0136311	1	-0.0182706	1	1	-0.00592407
Abcb8	0.0161223	1	-0.0767972	1	0.0164868	1	-0.0386315	1	1	-0.0207049
Abcc1	-0.0303814	1	0.00832374	1	0.00446365	1	0.152995	1	1	0.0338503
Abcc3	-0.165123	1	-0.179554	1	-0.0739517	1	-0.102694	1	1	-0.130331
Abcc5	0.0131277	1	0.0110395	1	-0.00811902	1	-0.0101281	1	1	0.00148003
Abcd1	0.0194352	1	0.0183652	1	0.00576618	1	-0.00286287	1	1	0.0101759
Abcd3	-0.0260768	1	0.00727957	1	-0.00232373	1	0.076204	1	1	0.0137708
Abcd4	-0.0465045	1	-0.0381654	1	-0.0569702	1	-0.0153587	1	1	-0.0392497
Abce1	-0.0434037	1	-0.0755618	1	-0.0787324	1	-0.0962974	1	1	-0.0734988
Abcf1	0.00950454	1	0.0492657	1	-0.066522	1	-0.0535358	1	1	-0.0153219
Abcf2	0.0335678	1	-0.0553496	1	0.00534279	1	-0.0135443	1	1	-0.00749581
Abcf3	0.008506	1	-0.00571359	1	0.0158952	1	-0.0161821	1	1	0.000626392
Abcg2	-0.0778079	1	0.0153589	1	-0.0479258	1	-0.00266262	1	1	-0.0282594
Abhd10	0.03001	1	0.0204923	1	0.0186004	1	-0.0495974	1	1	0.00487633
Abhd11	-0.00981684	1	-0.0424976	1	-0.0574954	1	-0.0384569	1	1	-0.0370667
Abhd12	-0.0156542	1	-0.0451889	1	0.00569096	1	-0.0440429	1	1	-0.0247988
Abhd13	0.00581034	1	-0.000458237	1	-0.0034732	1	-0.0372615	1	1	-0.00884564
Abhd14a	0.0134582	1	0.0360934	1	0.0415932	1	-0.0241947	1	1	0.0167376
Abhd14b	-0.00828893	1	-0.0123963	1	-0.00991483	1	-0.0164295	1	1	-0.0117574
Abhd16a	-0.00471022	1	-0.0623725	1	-0.0149779	1	-0.0693388	1	1	-0.0378498
Abhd17a	-0.0542115	1	-0.000816091	1	-0.0194671	1	0.0126296	1	1	-0.0154663
Abhd17b	0.0709215	1	0.0151463	1	0.0239577	1	-0.00630912	1	1	0.0259291
Abhd17c	0.0615908	1	0.0109941	1	0.00780171	1	0.0106601	1	1	0.0227617
Abhd18	-0.0131302	1	-0.0103707	1	-0.0355783	1	-0.00481512	1	1	-0.0159736
Abhd2	0.0924755	1	0.0539876	1	0.0186071	1	-0.206369	1	1	-0.0103247
Abhd4	0.0269757	1	-0.0217983	1	-0.00159493	1	0.0109839	1	1	0.0036416
Abhd5	0.0157919	1	0.0962312	1	-0.0161829	1	-0.0799709	1	1	0.00396731
Abhd6	0.00798567	1	0.00283762	1	0.00342295	1	0.00941599	1	1	0.00591556
Abhd8	0.0180683	1	-0.0791815	1	-0.0349276	1	-0.0948735	1	1	-0.0477286
Abi1	0.0308661	1	0.0358078	1	-0.0293178	1	0.0649428	1	1	0.0255747
Abi2	0.0361599	1	0.0178774	1	0.0266659	1	0.170051	1	1	0.0626886
Abl1	-0.00151828	1	-0.035919	1	-0.0112016	1	-0.0187148	1	1	-0.0168384
Abl2	-0.0127282	1	0.020987	1	-0.0883663	1	-0.0449475	1	1	-0.0312638
Ablim1	0.0406104	1	0.00297183	1	-0.0111319	1	-0.0173018	1	1	0.00378711
Abr	-0.00198886	1	-0.018607	1	-0.0380532	1	0.018959	1	1	-0.00992252
Abracl	-0.0957428	1	0.131338	1	-0.0321197	1	0.0554607	1	1	0.0147341
Abraxas1	0.00144406	1	0.0170715	1	-0.00130617	1	0.00398286	1	1	0.00529807
Abraxas2	0.00923722	1	-0.00490065	1	-0.0160689	1	-0.0847635	1	1	-0.024124
Abt1	0.0332984	1	0.0266355	1	-0.00987381	1	0.00932235	1	1	0.0148456
Abtb1	-0.0066296	1	0.0078343	1	0.00545648	1	-0.00921126	1	1	-0.00063752
Abtb2	-0.0136145	1	-0.00558533	1	-0.00444987	1	-0.00437891	1	1	-0.00700714
AC127341.3	0.0261897	1	-0.000277412	1	0.00939489	1	-0.128685	1	1	-0.0233445
AC129328.1	-0.00783695	1	0.00598515	1	0.0115492	1	0.00224826	1	1	0.00298642
AC149090.1	-0.0505175	1	-0.0347884	1	-0.0779869	1	0.00182923	1	1	-0.0403659
AC160336.1	0.505416	0.00137057	0.0346369	1	-0.0646484	1	0.267023	1	0.105639	0.185607
AC163032.1	-0.00222996	1	0.00369022	1	-0.00192435	1	-0.0114491	1	1	-0.00297829
AC165953.2	0.0381462	1	-0.0282544	1	-0.00136325	1	-0.0491626	1	1	-0.0101585
Acaa1a	-0.00443137	1	-0.0955164	1	-0.0132012	1	-0.0399771	1	1	-0.0382815
Acaa1b	-0.0297312	1	-0.0688339	1	-0.00478943	1	-0.060925	1	1	-0.0410699
Acaa2	-0.0281028	1	-0.0140156	1	0.100331	1	0.148261	1	1	0.0516185
Acaca	-0.0477649	1	-0.0179097	1	-0.014773	1	0.142602	1	1	0.0155387
Acad8	-0.00132177	1	-0.011939	1	-0.0115369	1	-0.0118378	1	1	-0.00915888
Acad9	-0.0133657	1	0.0250043	1	-0.0210459	1	-0.00271386	1	1	-0.00303032
Acadl	-0.000681552	1	-0.0194763	1	-0.0161021	1	-0.0279687	1	1	-0.0160572
Acadm	-0.0281852	1	0.108585	1	-0.0180286	1	0.0230109	1	1	0.0213456
Acads	-0.0452907	1	-0.0219563	1	-0.0797468	1	-0.00897652	1	1	-0.0389926
Acadsb	0.115494	1	0.0109746	1	0.0403292	1	-0.0411776	1	1	0.0314051
Acadvl	-0.0338636	1	-0.061976	1	-0.0140826	1	0.0406001	1	1	-0.0173305
Acap1	-0.0150823	1	-0.0341187	1	0.0194662	1	-0.0143417	1	1	-0.0110191
Acap2	0.054414	1	0.0965773	1	0.00460624	1	0.0843108	1	1	0.0599771
Acap3	0.0103748	1	0.0463592	1	-1.16785e-05	1	0.059649	1	1	0.0290928
Acat1	0.0679934	1	0.0926368	1	0.029315	1	0.0580485	1	1	0.0619984
Acat2	0.0483629	1	-0.0861388	1	-0.0273075	1	0.0270294	1	1	-0.00951349
Acbd3	0.0250769	1	0.0157544	1	-0.0878605	1	-0.179094	1	1	-0.0565308
Acbd4	0.0133551	1	0.0181496	1	-0.0227735	1	-0.0282626	1	1	-0.00488285
Acbd5	-0.0136489	1	0.0308387	1	-0.0363685	1	-0.0791753	1	1	-0.0245885
Acbd6	-0.0959681	1	-0.0676888	1	-0.0993106	1	-0.129292	1	1	-0.098065
Accs	-0.0126671	1	-0.000150398	1	0.00360405	1	-0.0125529	1	1	-0.00544159
Acd	0.0326316	1	-0.117029	1	-0.0184032	1	-0.0516218	1	1	-0.0386057
Ace	-0.0397085	1	-0.04909	1	-0.135639	1	-0.0586988	1	1	-0.070784
Acer3	0.0193309	1	0.0423046	1	0.0306975	1	0.0551102	1	1	0.0368608
Acin1	0.0456922	1	0.0767544	1	0.0413628	1	-0.113594	1	1	0.0125538
Ackr3	-0.167802	1	-0.0295774	1	0.0496804	1	0.0565671	1	1	-0.022783
Acly	-0.0132617	1	0.0182839	1	-0.022813	1	0.0383511	1	1	0.00514006
Aco1	0.0188142	1	0.00517525	1	-0.00338289	1	-0.0109815	1	1	0.00240626
Aco2	0.037042	1	0.029298	1	0.0214257	1	-0.0267301	1	1	0.0152589
Acod1	0.00188291	1	-0.00320139	1	0.0170576	1	0.160248	1	1	0.0439967
Acot13	0.00508861	1	-0.00835773	1	0.0176757	1	-0.00882852	1	1	0.00139451
Acot2	-0.0110446	1	-0.0159125	1	-0.0072221	1	-0.036969	1	1	-0.017787
Acot7	-0.0037973	1	-0.0631219	1	0.0108418	1	-0.0292522	1	1	-0.0213324
Acot8	0.0353267	1	-0.0161625	1	-0.00573718	1	-0.0174354	1	1	-0.00100211
Acot9	0.0235828	1	-0.0766987	1	0.0266261	1	-0.00429381	1	1	-0.00769591
Acox1	-0.0222015	1	-0.0496896	1	-0.0236778	1	-0.0315121	1	1	-0.0317703
Acox3	-0.0191062	1	0.01198	1	-0.0153145	1	0.00486303	1	1	-0.00439441
Acp1	-0.0630945	1	-0.144453	1	-0.0577976	1	-0.0305442	1	1	-0.0739724
Acp2	-0.0185973	1	-0.0230504	1	0.00503655	1	-0.0308058	1	1	-0.0168542
Acp5	-0.0270811	1	0.00339823	1	-0.0177686	1	0.108647	1	1	0.0167989
Acp6	-0.0102329	1	0.0131218	1	-0.0143548	1	-0.0239984	1	1	-0.00886606
Acsbg1	-0.122809	0.306287	-0.0364594	1	-0.0318203	1	0.0357416	1	0.967667	-0.0388367
Acsf2	0.00478605	1	0.00280732	1	0.00246089	1	-0.00531321	1	1	0.00118526
Acsf3	-0.00517875	1	0.00106293	1	-0.0150417	1	-0.00304304	1	1	-0.00555015
Acsl1	-0.021738	1	-0.00792362	1	-0.0433919	1	-0.00538758	1	1	-0.0196103
Acsl3	0.0941047	1	-0.0014544	1	-0.00392032	1	0.0375484	1	1	0.0315696
Acsl4	-0.0402286	1	0.0201726	1	-0.128234	1	-0.058374	1	1	-0.0516659
Acsl5	-0.0089949	1	0.0970124	1	0.041003	1	-0.0543558	1	1	0.0186662
Acsl6	-0.0139135	1	0.0101657	1	-0.00626511	1	-0.0206594	1	1	-0.00766809
Acss2	0.0174799	1	0.019477	1	-0.0162999	1	-0.0256285	1	1	-0.00124288
Acta2	0.0775081	1	-0.0446445	1	0.0179124	1	0.0365854	1	1	0.0218403
Actb	-0.112296	1	0.0519825	1	0.0248128	1	-0.100775	1	1	-0.034069
Actg1	-0.220612	1	-0.00871281	1	0.00116044	1	-0.0903339	1	1	-0.0796245
Actl6a	0.0145251	1	0.087809	1	-0.0188851	1	-0.0243512	1	1	0.0147744
Actn1	0.026604	1	0.0780096	1	-0.0663615	1	-0.072321	1	1	-0.0085172
Actn4	0.115942	1	0.0519831	1	0.0370713	1	0.0854368	1	1	0.0726083
Actr10	0.00230645	1	-0.041653	1	-0.0691443	1	0.0983652	1	1	-0.00253141
Actr1a	0.0970942	1	-0.126043	1	-0.0136134	1	-0.00997967	1	1	-0.0131355
Actr1b	0.0117409	1	0.0218563	1	-0.0109016	1	0.048807	1	1	0.0178757
Actr2	-0.0491885	1	0.0065564	1	-0.048124	1	-0.0601678	1	1	-0.037731
Actr3	0.0335304	1	0.118275	1	0.0161662	1	0.147371	1	1	0.0788357
Actr5	0.00747287	1	-0.0372302	1	-0.00266709	1	-0.0589695	1	1	-0.0228485
Actr6	0.0185609	1	-0.0107752	1	0.041178	1	-0.0185293	1	1	0.00760858
Actr8	0.0103347	1	-0.0175337	1	0.0222751	1	0.013807	1	1	0.00722074
Acvr1	-9.90804e-05	1	0.0333722	1	-0.0278717	1	-0.0426536	1	1	-0.00931304
Acvr1b	0.0082658	1	0.00662136	1	-0.00333436	1	-0.000325578	1	1	0.00280681
Acvr2a	0.0108271	1	0.0017448	1	-0.0172186	1	-0.0180489	1	1	-0.0056739
Acvr2b	-0.00122042	1	-0.0111788	1	-0.0110297	1	-0.0140024	1	1	-0.00935781
Acy1	-0.0179073	1	-0.0371681	1	-0.00775455	1	-0.00503544	1	1	-0.0169663
Acyp1	0.0526018	1	0.020094	1	0.00345365	1	-0.101318	1	1	-0.00629201
Acyp2	0.0215468	1	0.0529179	1	0.00849437	1	0.121267	1	1	0.0510564
Ada	-0.0229815	1	0.00474163	1	-0.00869841	1	-0.0254263	1	1	-0.0130911
Adal	-0.00520505	1	-0.000968071	1	0.00485798	1	0.00191752	1	1	0.000150593
Adam10	-0.0550745	1	0.0721131	1	-0.0560385	1	-0.0883756	1	1	-0.0318439
Adam12	-0.0190418	1	0.0156007	1	-0.0112701	1	-0.00864037	1	1	-0.00583788
Adam15	-0.0112703	1	0.0154546	1	-0.0164042	1	-0.0213007	1	1	-0.00838015
Adam17	0.0218608	1	0.0383509	1	-0.00552899	1	0.0820806	1	1	0.0341908
Adam19	0.0128734	1	-0.00408806	1	4.62584e-05	1	-0.0131411	1	1	-0.00107737
Adam33	0.0253891	1	0.0405535	1	0.0301022	0.0535523	-0.00387466	1	0.66356	0.0230425
Adam8	-0.125508	0.0140142	-0.0486953	1	-0.0836188	1	-0.0415963	1	0.382993	-0.0748546
Adam9	-0.0311042	1	-0.0279963	1	-0.0602399	1	-0.0958546	1	1	-0.0537988
Adamts1	-0.156449	1	0.0292707	1	-0.0365016	1	-0.14448	1	1	-0.0770398
Adamts10	0.0103804	1	-0.00790883	1	-0.00457471	1	-0.0527629	1	1	-0.0137165
Adamts14	0.000579189	1	0.00602045	1	0.00804012	1	-0.00846451	1	1	0.00154381
Adamts4	-0.00205092	1	-0.0116357	1	-0.0190659	1	-0.0217355	1	1	-0.013622
Adamts6	-0.0172768	1	0.0176008	1	-0.0165714	1	-0.0144892	1	1	-0.00768413
Adamts8	-0.00778752	1	0.0341282	1	0.0244788	1	0.0107698	1	1	0.0153973
Adamtsl3	0.025594	1	0.00689827	1	-0.0137306	1	-0.00283554	1	1	0.00398151
Adar	-0.00469664	1	-0.018309	1	-0.0025323	1	-0.0705388	1	1	-0.0240192
Adarb1	-0.125882	1	-0.0184232	1	-0.0399189	1	-0.0259412	1	1	-0.0525412
Adat1	-0.000715736	1	-0.0231851	1	-0.0101702	1	-0.0326561	1	1	-0.0166818
Adat2	-0.075486	1	-0.03176	1	-0.000852764	1	0.0146004	1	1	-0.0233746
Adck1	0.00237023	1	-0.00247564	1	-0.0213501	1	-0.019679	1	1	-0.0102836
Adck2	-0.00361533	1	0.00804656	1	-0.00763065	1	0.00297147	1	1	-5.69879e-05
Adck5	0.00251223	1	-0.0187624	1	0.0377624	1	-0.0263881	1	1	-0.00121898
Adcy3	-0.0315183	1	0.0104157	1	-0.0230934	1	-0.0606022	1	1	-0.0261995
Adcy6	0.000197336	1	0.0202609	1	0.00732171	1	-0.0155093	1	1	0.00306766
Adcy7	-0.0201488	1	0.0687003	1	-0.0293282	1	0.00997948	1	1	0.00730071
Add1	0.0537348	1	0.00826989	1	-0.00390583	1	-0.0370088	1	1	0.0052725
Add2	-0.0432289	1	-0.0116568	1	-0.0704761	1	-0.0204513	1	1	-0.0364533
Add3	0.0631228	1	-0.0193229	1	-0.0201749	1	0.013032	1	1	0.00916427
Adgra3	0.00656109	1	0.0311025	1	-0.010916	1	-0.0119713	1	1	0.00369406
Adgre5	0.00117976	1	0.0493957	1	-0.00843579	1	-0.00142927	1	1	0.0101776
Adgrg3	-0.0387626	1	-0.0232115	1	-0.0662594	1	-0.0179679	1	1	-0.0365503
Adgrg6	-0.102064	1	0.0483584	1	-0.0256135	1	-0.0128266	1	1	-0.0230365
Adgrl1	-0.00195595	1	-0.0146344	1	-0.031626	1	-0.0147653	1	1	-0.0157454
Adgrl2	0.00215676	1	0.0185387	1	0.00629801	1	0.0461265	1	1	0.01828
Adh5	-0.00986842	1	-0.0426386	1	-0.0445946	1	0.0598726	1	1	-0.00930727
Adi1	-0.0190944	1	-0.0369257	1	-0.0129205	1	-0.00673134	1	1	-0.018918
Adipor1	0.0148396	1	0.0342856	1	0.0701128	1	0.0480494	1	1	0.0418219
Adipor2	-0.195964	0.421787	0.0169201	1	-0.0821487	1	-0.10576	1	0.988279	-0.091738
Adk	0.0263894	1	0.0833417	1	0.0296858	1	0.0576886	1	1	0.0492764
Adm	-0.273816	0.197548	-0.0450809	1	-0.223569	1	-0.126176	1	0.918157	-0.16716
Adnp	0.00470413	1	-0.00394059	1	-0.0114037	1	-0.0177975	1	1	-0.00710944
Adnp2	0.0225775	1	0.00984461	1	0.0222476	1	-0.0165141	1	1	0.00953889
Ado	-0.0608401	1	0.0782575	1	-0.083799	1	-0.0708103	1	1	-0.034298
Adpgk	0.0469917	1	0.01782	1	-0.0139955	1	-0.0523611	1	1	-0.000386219
Adprh	0.0483959	1	0.0199277	1	-0.0215118	1	-0.0513742	1	1	-0.00114061
Adprhl2	0.0114829	1	0.10341	1	-0.0147763	1	0.079672	1	1	0.0449472
Adprm	-0.0450681	1	-0.00771941	1	0.0120742	1	-0.00834344	1	1	-0.0122642
Adrm1	0.0745099	1	-0.0458882	1	0.00239552	1	-0.0422948	1	1	-0.00281939
Adsl	-0.0104395	1	0.0973015	1	0.015499	1	0.058352	1	1	0.0401782
Adss	-0.095442	1	-0.0497337	1	-0.102828	1	-0.188459	1	1	-0.109116
Adssl1	-0.0607399	1	0.0239692	1	-0.0186406	1	0.106033	1	1	0.0126555
Aebp2	0.0288911	1	0.0869992	1	-0.0703194	1	0.0110596	1	1	0.0141576
Aen	0.0176036	1	-0.0412717	1	-0.0095229	1	-0.0318999	1	1	-0.0162727
Aes	-0.0792757	1	0.00439273	1	0.00560072	1	0.089502	1	1	0.00505493
Afap1	-0.0149197	1	0.0904037	1	-0.0619874	1	-0.0696984	1	1	-0.0140504
Afap1l2	0.0144441	1	-0.0180947	1	-0.00663753	1	-0.0299169	1	1	-0.0100512
Afdn	-0.0079511	1	0.145631	1	0.0214121	1	-0.0236539	1	1	0.0338595
Aff1	-0.0426659	1	0.0045432	1	-0.00405586	1	-0.0314949	1	1	-0.0184184
Aff4	0.0594951	1	0.0604039	1	-0.0629633	1	-0.0540065	1	1	0.000732299
Afg1l	-0.0139338	1	0.0117714	1	-0.00831016	1	-0.000938381	1	1	-0.00285273
Afg3l1	-0.0106651	1	-0.0672952	1	-0.0530397	1	-0.0701235	1	1	-0.0502809
Afg3l2	-0.0197359	1	-0.0069603	1	0.0121204	1	-0.0400055	1	1	-0.0136453
Afmid	0.00642174	1	0.0108473	1	0.00753995	1	-0.0203648	1	1	0.00111105
Aftph	0.00598756	1	0.00415546	1	0.000883057	1	0.00976652	1	1	0.00519815
Aga	-0.0526739	1	-0.059841	1	-0.0508295	1	-0.0697476	1	1	-0.058273
Agap1	0.0191244	1	0.0421383	1	-0.0408701	1	-0.0542651	1	1	-0.0084681
Agap3	0.0373084	1	0.000518358	1	-0.011963	1	0.102715	1	1	0.0321447
Agbl3	-0.0019854	1	-0.0393452	1	0.00954656	1	-0.0112372	1	1	-0.0107553
Agbl5	-0.00482803	1	0.000944827	1	0.000888903	1	-0.0107418	1	1	-0.00343403
Agfg1	0.0717632	1	0.0300276	1	0.0243184	1	0.111936	1	1	0.0595114
Agfg2	-0.00139088	1	-0.0110959	1	-0.0234725	1	-0.0126058	1	1	-0.0121413
Aggf1	0.049214	1	0.0248826	1	-0.00614589	1	0.128522	1	1	0.0491181
Agk	-0.0148164	1	0.035633	1	-0.00990557	1	-0.0134323	1	1	-0.000630317
Agl	-0.0206424	1	-0.0611722	1	-0.041648	1	-0.12517	1	1	-0.0621582
Ago1	-0.0038069	1	0.0104987	1	-0.0279453	1	-0.0106714	1	1	-0.00798122
Ago2	-0.0220575	1	-0.00908192	1	-0.0356334	1	-0.0994578	1	1	-0.0415576
Ago3	0.0105942	1	0.0164696	1	0.00458917	1	0.00749592	1	1	0.00978722
Agpat1	-0.0172893	1	-0.0492819	1	-0.0135121	1	-0.0218324	1	1	-0.0254789
Agpat2	-0.0113854	1	0.0182582	1	0.0358348	1	-0.0163393	1	1	0.00659208
Agpat3	-0.0934676	1	0.101953	1	0.0103124	1	-0.0678241	1	1	-0.0122566
Agpat4	0.0599243	1	0.0480134	1	0.00111456	1	0.0128725	1	1	0.0304812
Agpat5	-0.0863588	1	-0.00550939	1	-0.0779746	1	-0.117844	1	1	-0.0719217
Agps	0.0213249	1	-0.0322478	1	-0.00658777	1	-0.0784019	1	1	-0.0239782
Agrn	-0.0410485	1	0.0391584	1	-0.0598489	1	-0.0383224	1	1	-0.0250154
Agtpbp1	0.0133224	1	0.0335104	1	-0.00808406	1	-0.00621552	1	1	0.0081333
Agtrap	0.0155897	1	0.0363017	1	0.00139367	1	-0.0422248	1	1	0.00276507
Ahctf1	0.0556332	1	-0.0489414	1	-0.10113	1	-0.101451	1	1	-0.0489722
Ahcy	-0.000285177	1	0.0118542	1	0.00192432	1	-0.030898	1	1	-0.00435114
Ahcyl1	-0.00776457	1	0.0907471	1	0.0132668	1	-0.00349617	1	1	0.0231883
Ahcyl2	-0.00619254	1	-0.00913128	1	-0.0275038	1	-0.0126044	1	1	-0.013858
Ahdc1	0.0674849	1	-0.00524154	1	-0.0352176	1	-0.037037	1	1	-0.0025028
Ahi1	0.0469423	1	-0.00199565	1	-0.0102442	1	0.0193717	1	1	0.0135186
Ahnak	0.00467789	1	0.200247	1	-0.0664467	1	-0.0230492	1	1	0.0288571
Ahnak2	-0.0576278	1	0.0428519	1	-0.00958372	1	0.0395798	1	1	0.00380504
Ahr	0.0834255	1	0.119735	1	-0.0397097	1	0.0419161	1	1	0.0513418
Ahsa1	0.0184391	1	-0.0229081	1	0.00274119	1	-0.113491	1	1	-0.0288046
Ahsa2	0.0526257	1	-0.0129459	1	-0.00593983	1	0.0864387	1	1	0.0300447
AI314180	-0.0558813	1	0.0524662	1	-0.0327323	1	-0.0355058	1	1	-0.0179133
AI413582	-0.0106869	1	-0.025782	1	-0.0286778	1	0.0475588	1	1	-0.00439699
AI467606	0.00463127	1	0.0780355	1	-0.00865884	1	-0.0578177	1	1	0.00404757
AI597479	0.00917754	1	0.0485058	1	-0.00300383	1	-0.0145052	1	1	0.0100436
AI606181	0.0133933	1	-0.0118269	1	0.0127098	1	-0.0152154	1	1	-0.000234824
AI661453	0.00312882	1	-0.0263725	1	0.000822195	1	-0.00122573	1	1	-0.0059118
AI837181	0.188871	0.0126505	0.0350081	1	0.0493021	1	0.0922634	1	0.364691	0.0913613
AI987944	0.0249165	1	-0.00441226	1	0.00750327	1	0.0062487	1	1	0.00856404
Aida	-0.0193143	1	0.0239161	1	-0.0653757	1	-0.0246325	1	1	-0.0213516
Aif1l	-0.00451573	1	-0.0465669	1	0.0042717	1	-0.0648819	1	1	-0.0279232
Aifm1	-0.0114565	1	-0.0655379	1	-0.0374881	1	-0.097044	1	1	-0.0528816
Aifm2	-0.0366052	1	-0.00769579	1	-0.0185584	1	0.0318853	1	1	-0.00774352
Aig1	-0.159113	1	-0.032848	1	-0.0291673	1	0.086618	1	1	-0.0336277
Aimp1	-0.0405556	1	-0.0957746	1	0.0443216	1	0.0883012	1	1	-0.00092686
Aimp2	-0.00429787	1	-0.0693724	1	-0.00454672	1	-0.0364525	1	1	-0.0286674
Aip	0.0348332	1	-0.000877471	1	0.00776678	1	-0.0469214	1	1	-0.00129973
Airn	0.00543892	1	-0.0174058	1	-0.000438165	1	-0.00356518	1	1	-0.00399256
Ajuba	0.00689426	1	0.0041823	1	0.00489428	1	-0.0114202	1	1	0.00113765
Ak1	-0.0215356	1	-0.0321207	1	-0.0105818	1	0.0131419	1	1	-0.0127741
Ak2	0.0352149	1	-0.00662052	1	-0.0115046	1	0.0382253	1	1	0.0138288
Ak3	0.0667002	1	0.0146811	1	-0.00242533	1	-0.00390342	1	1	0.0187631
Ak4	0.00816385	1	0.000405549	1	-0.0331966	1	0.0103539	1	1	-0.00356832
Ak6	0.0288201	1	-0.00671415	1	0.0163848	1	-0.00407378	1	1	0.00860425
Akap1	-0.00732497	1	-0.0183443	1	-0.0138942	1	0.000976695	1	1	-0.00964669
Akap10	-0.00108626	1	-0.000872138	1	-0.00973132	1	-0.00271473	1	1	-0.00360111
Akap11	0.0389345	1	0.0338632	1	-0.0116974	1	0.0749364	1	1	0.0340092
Akap13	-0.0454297	1	0.0289297	1	0.0176391	1	-0.0151357	1	1	-0.00349915
Akap2	0.0389433	1	0.0992058	1	-0.00596658	1	0.0297391	1	1	0.0404804
Akap7	-0.0287903	1	0.00874113	1	-0.0267164	1	-0.0284131	1	1	-0.0187947
Akap8	-0.00114303	1	0.00831608	1	-0.0185712	1	-0.019336	1	1	-0.00768356
Akap8l	0.0141091	1	0.0165162	1	-0.00669027	1	-0.011426	1	1	0.00312728
Akap9	-0.0487845	1	0.138953	1	-0.0384953	1	-0.101807	1	1	-0.0125334
Akirin1	-0.00396403	1	-0.0561503	1	-0.0279104	1	0.037902	1	1	-0.0125307
Akirin2	0.0305565	1	0.0614307	1	-0.0207666	1	-0.0878893	1	1	-0.0041672
Akr1a1	-0.0147419	1	-0.0159923	1	-0.00814312	1	0.084137	1	1	0.0113149
Akr1b10	0.00915156	1	-0.0542565	1	-0.01945	1	-0.00375411	1	1	-0.0170773
Akr1b3	-0.01338	1	0.0488855	1	-0.0409553	1	-0.080086	1	1	-0.0213839
Akr1b8	-0.0394883	1	-0.00554925	1	-0.0586981	1	-0.0901766	1	1	-0.0484781
Akr1e1	0.0118743	1	0.0171971	1	-0.00634084	1	-0.00667493	1	1	0.00401391
Akr7a5	0.0183501	1	-0.0723388	1	0.00786761	1	0.00314722	1	1	-0.0107435
Akt1	0.0329143	1	0.0780826	1	-0.0037813	1	0.0257096	1	1	0.0332313
Akt1s1	0.0751926	1	0.00355848	1	0.00476817	1	-0.0941576	1	1	-0.00265961
Akt2	0.0413798	1	-0.00695341	1	0.000376813	1	-0.0349083	1	1	-2.62928e-05
Akt3	0.0138256	1	-0.029875	1	-0.0434962	1	-0.0485208	1	1	-0.0270166
Aktip	-0.0369259	1	-0.0560087	1	-0.0375641	1	-0.0887321	1	1	-0.0548077
AL590144.2	-0.000309267	1	-0.0160527	1	-0.0105893	1	0.015942	1	1	-0.00275231
Alad	-0.0679542	1	0.0300995	1	-0.0423446	1	-0.0833936	1	1	-0.0408982
Alas1	-0.000951934	1	7.63694e-05	1	0.011147	1	-0.102675	1	1	-0.0231008
Alcam	-0.248276	1	0.0648444	1	-0.0875542	1	-0.123524	1	1	-0.0986274
Aldh16a1	0.00142242	1	-0.00888482	1	-0.00377601	1	-0.0247387	1	1	-0.00899428
Aldh18a1	0.012103	1	0.00636744	1	-0.00682628	1	-0.0246678	1	1	-0.00325591
Aldh2	0.127143	1	0.0799806	1	0.094953	1	0.0335476	1	1	0.0839061
Aldh3a2	0.0443959	1	0.0148191	1	-0.0512254	1	-0.00822566	1	1	-5.90125e-05
Aldh3b1	-0.00980059	1	-0.0384874	1	-0.0147604	1	0.000440557	1	1	-0.015652
Aldh5a1	0.0150061	1	-0.00736747	1	-0.00435747	1	-0.0150518	1	1	-0.00294265
Aldh6a1	-0.00119713	1	-0.0139395	1	-0.00931059	1	-0.0172789	1	1	-0.0104315
Aldh7a1	0.00557241	1	-0.00324398	1	-0.00837303	1	0.00736035	1	1	0.000328939
Aldh9a1	0.0771436	1	-0.0346917	1	-0.0336913	1	-0.0634638	1	1	-0.0136758
Aldoa	-0.0839919	1	-0.0401032	1	0.0199164	1	0.103601	1	1	-0.000144455
Aldoc	-0.0064355	1	-0.102684	1	-0.0696145	1	0.0135473	1	1	-0.0412968
Alg1	-0.00680862	1	-0.0645237	1	-0.0112291	1	0.0131671	1	1	-0.0173486
Alg10b	-0.0162455	1	0.024989	1	0.00244101	1	0.0293051	1	1	0.0101224
Alg11	-0.010667	1	-0.0586249	1	-0.0307862	1	-0.0210401	1	1	-0.0302795
Alg12	0.0109495	1	0.0129361	1	-0.00810549	1	-0.000571317	1	1	0.0038022
Alg13	0.0131784	1	-0.00548281	1	0.000395175	1	-0.000313325	1	1	0.00194436
Alg14	-0.0357168	1	-0.0171123	1	-0.0266041	1	0.292224	1	1	0.0531976
Alg2	0.0364826	1	0.0131396	1	-0.00218153	1	0.00163732	1	1	0.0122695
Alg3	-0.00808769	1	-0.00583209	1	0.00326193	1	-0.0113587	1	1	-0.00550413
Alg5	-0.0612274	1	-0.0232622	1	-0.0303474	1	-0.0427174	1	1	-0.0393886
Alg6	0.035202	1	-0.00689247	1	0.00913832	1	0.0124045	1	1	0.0124631
Alg8	-0.00275825	1	0.000770532	1	0.0178264	1	-0.021756	1	1	-0.00147935
Alg9	-0.0158842	1	-0.0115965	1	-0.00755671	1	-0.00603016	1	1	-0.0102669
Alkbh1	0.0183321	1	-0.00130065	1	-0.0157706	1	0.0185687	1	1	0.00495737
Alkbh2	0.0484947	1	0.103184	1	0.0378162	1	-0.0133134	1	1	0.0440455
Alkbh3	0.0222584	1	-0.0275313	1	0.0195368	1	0.0487912	1	1	0.0157637
Alkbh4	0.00423247	1	0.0106966	1	-0.0108931	1	-0.000550743	1	1	0.000871306
Alkbh5	0.00897249	1	0.0372277	1	-0.087104	1	-0.229091	1	1	-0.0674988
Alkbh6	0.0805236	1	0.0272683	1	-0.00487782	1	0.244484	1	1	0.0868495
Alkbh7	0.0397909	1	-0.00755764	1	-0.0182319	1	0.00127987	1	1	0.00382032
Alkbh8	-0.0157951	1	0.0972076	1	-0.0323942	1	-0.0414059	1	1	0.0019031
Alms1	-0.0108938	1	0.0104793	1	0.00404798	1	-0.0160264	1	1	-0.00309823
Alpk1	-0.000587168	1	0.0115882	1	-0.0164262	1	0.0495773	1	1	0.0110381
Als2	-0.0211876	1	-0.0141853	1	-0.0146353	1	-0.00310979	1	1	-0.0132795
Als2cl	-0.0261269	1	0.00685619	1	-0.00186439	1	-0.0190339	1	1	-0.0100422
Alyref	0.0487024	1	0.00412046	1	0.0461222	1	0.0878998	1	1	0.0467112
Alyref2	0.0137176	1	0.00194114	1	-0.0150701	1	0.0198632	1	1	0.00511295
Amacr	0.00231715	1	0.0687082	1	-0.00763798	1	-0.0200128	1	1	0.0108436
Ambra1	-0.0144675	1	0.0207134	1	-0.00657903	1	-0.00436926	1	1	-0.00117559
Amd1	-0.091311	1	0.00849143	1	0.014697	1	-0.00861219	1	1	-0.0191837
Amd2	-0.0201913	1	0.0820507	1	0.00113856	1	-0.0174283	1	1	0.0113924
Amer1	0.0509812	1	0.0281717	1	-0.0376666	1	-0.0209411	1	1	0.00513633
Amfr	-0.0244866	1	-0.0704326	1	-0.0528403	1	-0.0201176	1	1	-0.0419693
Amigo2	0.0903111	0.0138974	0.00465854	1	0.0247017	1	-0.0198033	1	0.381475	0.024967
Ammecr1	-0.0300812	1	0.00410357	1	0.0175244	1	-0.0533987	1	1	-0.015463
Ammecr1l	-0.00267712	1	0.0084893	1	-0.0032142	1	0.0333418	1	1	0.00898494
Amn1	-0.0182411	1	-0.00573433	1	-0.0362572	1	0.0356467	1	1	-0.00614648
Amot	-0.0164827	1	0.0059034	1	-0.0183164	1	0.000164683	1	1	-0.00718274
Amotl1	0.0401549	1	0.0784599	1	-0.0421984	1	-0.0965515	1	1	-0.00503379
Amotl2	0.0298118	1	0.0298883	1	-0.00109092	1	-0.0562534	1	1	0.000588969
Ampd2	-0.0351671	1	-0.0345877	1	-0.0153648	1	-0.0119162	1	1	-0.0242589
Ampd3	-0.0187926	1	-0.0410127	1	0.0268878	1	-0.0433835	1	1	-0.0190752
Amz2	0.0161252	1	-0.0149146	1	-0.0116982	1	-0.0600991	1	1	-0.0176467
Anapc1	0.0151983	1	0.000910603	1	-0.00519852	1	-0.0398245	1	1	-0.00722852
Anapc10	-0.00365752	1	-0.0695202	1	-0.012433	1	0.0650224	1	1	-0.00514709
Anapc11	0.118821	1	0.0491205	1	0.0750122	1	-0.0203512	1	1	0.0556505
Anapc13	0.0951388	1	-0.0255286	1	0.00932044	1	-0.0633087	1	1	0.00390549
Anapc15	-0.00638402	1	0.00990631	1	0.0155796	1	-0.029437	1	1	-0.00258379
Anapc16	-0.0865845	1	0.0989312	1	-0.0141811	1	0.0287286	1	1	0.00672354
Anapc2	-0.021478	1	0.0175742	1	0.0398961	1	-0.0353367	1	1	0.000163886
Anapc4	0.0821665	1	0.0776741	1	-0.0525152	1	-0.060543	1	1	0.0116956
Anapc5	0.0189029	1	-0.0453077	1	-0.0158928	1	-0.0918027	1	1	-0.0335251
Anapc7	0.0430037	1	0.0490031	1	-0.00154198	1	-0.00124139	1	1	0.0223059
Angel2	-0.00466295	1	0.00282414	1	-0.000162227	1	-0.0669527	1	1	-0.0172384
Angpt2	0.00899033	1	-0.0160543	1	0.0125501	1	-0.00610662	1	1	-0.000155112
Angptl2	-0.0327649	1	-0.146327	1	-0.0436218	1	0.00841003	1	1	-0.0535759
Angptl4	-0.0329956	1	0.0641483	1	-0.0135134	1	0.0670907	1	1	0.0211825
Ank	-0.140599	1	-0.0140576	1	-0.184283	1	-0.0845468	1	1	-0.105872
Ank3	-0.134559	1	-0.0324463	1	-0.0707348	1	-0.0868543	1	1	-0.0811487
Ankfy1	0.0177249	1	-0.0286474	1	0.0113264	1	0.0300986	1	1	0.00762563
Ankhd1	0.0305945	1	0.00471853	1	-0.0230966	1	-0.041541	1	1	-0.00733115
Ankib1	-0.0328473	1	-0.0112997	1	-0.00306784	1	-0.0447163	1	1	-0.0229828
Ankle2	-0.0123092	1	-0.0502974	1	-0.0205785	1	-0.0398063	1	1	-0.0307478
Ankmy1	0.0151795	1	0.0648475	1	0.00696484	1	-0.0335211	1	1	0.0133677
Ankmy2	-0.00519165	1	-0.0118361	1	0.000720182	1	-0.0220168	1	1	-0.00958109
Ankra2	0.0808538	1	-0.00952705	1	0.0308258	1	0.00950445	1	1	0.0279142
Ankrd1	0.00951637	1	0.0386969	1	0.0520207	1	-0.0471614	1	1	0.0132682
Ankrd10	0.00856916	1	-0.0392345	1	-0.0303276	1	0.0195079	1	1	-0.0103713
Ankrd11	0.0143581	1	0.0317538	1	-0.0865316	1	-0.172043	1	1	-0.0531158
Ankrd12	0.0220472	1	-0.0469228	1	-0.110872	1	-0.0917648	1	1	-0.0568782
Ankrd13a	-0.00249371	1	-0.0239533	1	-0.0122981	1	-0.0117785	1	1	-0.0126309
Ankrd13b	0.0149646	1	-0.00359316	1	-0.0142416	1	0.157652	1	1	0.0386955
Ankrd13c	0.015092	1	-0.00140644	1	-0.0350693	1	-0.027944	1	1	-0.0123319
Ankrd13d	-0.00537738	1	0.00307443	1	-0.00676459	1	0.000687109	1	1	-0.00209511
Ankrd16	0.020851	1	0.00182923	1	-0.00322234	1	0.0158886	1	1	0.00883662
Ankrd17	0.0254289	1	0.0917374	1	-0.0694349	1	-0.0280036	1	1	0.00493193
Ankrd24	0.00109183	1	-0.00533365	1	0.00637433	1	0.0162717	1	1	0.00460105
Ankrd26	0.0737528	1	-0.00172215	1	0.0467594	1	-0.000168626	1	1	0.0296554
Ankrd27	-0.00858436	1	-0.0108868	1	0.00339127	1	0.0263282	1	1	0.00256207
Ankrd28	0.0114763	1	0.090883	1	-0.00522863	1	0.0122719	1	1	0.0273506
Ankrd33b	0.00510931	1	0.106616	1	0.0364396	1	-0.0332848	1	1	0.0287201
Ankrd37	-0.0957252	1	-0.0790516	1	-0.0984164	1	-0.0841553	1	1	-0.0893371
Ankrd39	0.00192389	1	0.0224349	1	0.00506872	1	0.0152917	1	1	0.0111798
Ankrd40	-0.0144202	1	0.0230682	1	-0.0142928	1	0.0136606	1	1	0.00200393
Ankrd42	0.0018206	1	0.00809911	1	0.00234222	1	-0.00776141	1	1	0.00112513
Ankrd44	-0.00767033	1	0.0186002	1	-0.00895676	1	0.00230186	1	1	0.00106874
Ankrd46	0.0262272	1	0.00695253	1	-0.0102993	1	-0.0145171	1	1	0.00209082
Ankrd49	-0.0269492	1	0.0281848	1	-0.0174353	1	-0.0117265	1	1	-0.00698153
Ankrd50	-0.0295212	1	0.093569	1	-0.00639651	1	-0.0606109	1	1	-0.000739889
Ankrd52	0.00542109	1	0.00447215	1	-0.0218207	1	-0.0024629	1	1	-0.00359758
Ankrd54	0.0243397	1	-0.0499591	1	-0.0372026	1	0.00884211	1	1	-0.013495
Ankrd9	-0.0164842	1	-0.0478141	1	-0.0309704	1	-0.0191993	1	1	-0.028617
Anks1	0.00529691	1	-0.00756199	1	-0.0195777	1	-0.0155975	1	1	-0.00936008
Anks3	-0.0226748	1	-0.0102346	1	-0.0108327	1	-0.00791042	1	1	-0.0129131
Ankzf1	0.00206292	1	0.00862856	1	-0.00645037	1	-0.00355841	1	1	0.000170678
Anln	-0.0264198	1	0.15559	1	0.100291	1	-0.103285	1	1	0.0315441
Ano1	-0.00554755	1	0.0811387	1	0.0098823	1	-0.00303663	1	1	0.0206092
Ano10	-0.0121031	1	-0.00738797	1	-0.0371199	1	-0.032568	1	1	-0.0222948
Ano4	-0.0856402	0.483517	-0.0638126	1	0.000937609	1	-0.0566381	1	0.993456	-0.0512883
Ano6	-0.0548292	1	0.0534886	1	0.0409566	1	-0.0596164	1	1	-0.0050001
Ano8	-0.0348898	1	-0.0258791	1	-0.0414374	1	-0.0355043	1	1	-0.0344276
Anp32a	-0.0535815	1	-0.0741694	1	-0.026816	1	-0.161192	1	1	-0.0789397
Anp32b	0.0258683	1	0.0387318	1	0.0962827	1	0.0235229	1	1	0.0461014
Anp32e	-0.0759766	1	0.00405832	1	0.0495686	1	0.00708421	1	1	-0.00381637
Antxr2	-0.0475725	1	0.0296731	1	-0.157844	1	-0.0686196	1	1	-0.0610906
Anxa1	0.0296663	1	0.0903962	1	0.0686846	1	-0.0540564	1	1	0.0336727
Anxa11	0.0163946	1	0.0223786	1	0.0252598	1	0.0225541	1	1	0.0216468
Anxa2	-0.0496548	1	0.00149677	1	0.0249846	1	-0.0142083	1	1	-0.00934543
Anxa3	-0.196801	1	0.0777161	1	-0.0203086	1	0.00464464	1	1	-0.0336872
Anxa4	-0.0628055	1	-0.0294728	1	-0.0650292	1	-0.0589064	1	1	-0.0540535
Anxa5	-0.0714821	1	-0.000503444	1	0.073749	1	0.110409	1	1	0.0280432
Anxa6	0.095677	1	0.0129678	1	-0.0107354	1	-0.047952	1	1	0.0124893
Anxa7	0.039227	1	0.0196118	1	0.0291112	1	-0.0180659	1	1	0.017471
Anxa8	-0.102177	1	-0.0143667	1	-0.0253282	1	0.0159936	1	1	-0.0314697
Anxa9	-0.0111609	1	-0.0365899	1	-0.000142008	1	0.00653665	1	1	-0.010339
Aox1	0.0130503	1	-0.0011382	1	0.00032157	1	-0.00484591	1	1	0.00184695
Ap1ar	-0.0750858	1	-0.0116042	1	0.00343892	1	-0.0207208	1	1	-0.025993
Ap1b1	0.00886439	1	-0.00267932	1	-0.0409465	1	-0.0312821	1	1	-0.0165109
Ap1g1	-0.0515678	1	0.03184	1	-0.039757	1	0.0283572	1	1	-0.00778191
Ap1g2	0.0128744	1	0.0100462	1	0.00868367	1	0.00421931	1	1	0.00895591
Ap1m1	0.036022	1	-0.0195969	1	-0.0625541	1	-0.118254	1	1	-0.0410957
Ap1s1	0.0577694	1	-0.0228874	1	0.0181315	1	-0.0825385	1	1	-0.00738125
Ap1s2	-0.00988409	1	0.0176482	1	-0.0193963	1	0.000985764	1	1	-0.0026616
Ap1s3	0.0190481	1	0.0243746	1	0.000289056	1	0.00463242	1	1	0.0120861
Ap2a1	-0.027792	1	0.016648	1	0.0235694	1	-0.125854	1	1	-0.0283571
Ap2a2	0.0495755	1	0.0364561	1	0.0145877	1	0.0360789	1	1	0.0341745
Ap2b1	0.0638598	1	-0.0647345	1	-0.0415546	1	-0.0828873	1	1	-0.0313291
Ap2m1	0.0320806	1	0.0152398	1	0.0395475	1	0.00794179	1	1	0.0237024
Ap2s1	0.010006	1	0.029711	1	0.0425579	1	0.078608	1	1	0.0402208
Ap3b1	0.0769912	1	0.00679772	1	-0.0270074	1	-0.0576726	1	1	-0.000222797
Ap3d1	-0.0358756	1	0.050123	1	-0.00885265	1	0.0104708	1	1	0.00396637
Ap3m1	-0.0135478	1	0.0312921	1	-0.0150377	1	-0.0256208	1	1	-0.00572855
Ap3m2	-0.0251723	1	-0.0409362	1	-0.00290841	1	-0.00911658	1	1	-0.0195334
Ap3s1	-0.0131187	1	-0.00718654	1	0.0110034	1	-0.00685129	1	1	-0.00403829
Ap3s2	-0.0214376	1	0.0352365	1	0.0201293	1	-0.0272752	1	1	0.00166325
Ap4b1	-0.020672	1	0.00327351	1	-0.00853453	1	0.0166842	1	1	-0.0023122
Ap4e1	-0.010596	1	0.00190228	1	-0.0122288	1	-0.00885751	1	1	-0.00744501
Ap4m1	-0.00936198	1	0.00076976	1	0.0155015	1	-0.0418627	1	1	-0.00873835
Ap4s1	-0.0227727	1	-0.0207572	1	-0.0224028	1	-0.0338387	1	1	-0.0249429
Ap5m1	0.00757219	1	-0.0154283	1	-0.00521616	1	0.00178494	1	1	-0.00282183
Ap5s1	0.00744594	1	0.00182115	1	0.00648521	1	-0.00995322	1	1	0.00144977
Ap5z1	0.00286511	1	0.0030492	1	-0.0120901	1	-0.0160127	1	1	-0.00554713
Apaf1	-0.0297275	1	0.0268314	1	0.0072386	1	-0.0090641	1	1	-0.00118039
Apba3	-0.00873429	1	0.000224528	1	-0.0174607	1	-0.0245316	1	1	-0.0126255
Apbb1	0.0262162	1	-0.0125327	1	-0.00775786	1	-0.0296088	1	1	-0.00592079
Apbb1ip	-0.0919864	1	0.0443202	1	-0.0422769	1	-0.0181251	1	1	-0.0270171
Apbb2	-0.0514352	1	0.0522181	1	-0.0585607	1	-0.0229748	1	1	-0.0201882
Apc	-0.0559711	1	0.0638874	1	-0.0154608	1	-0.0258617	1	1	-0.00835157
Apeh	0.00921066	1	-0.101954	1	0.0105661	1	0.0038693	1	1	-0.0195769
Apex1	0.0649191	1	0.0152616	1	0.0805359	1	0.13848	1	1	0.0747991
Apex2	-0.00693067	1	0.00402569	1	-0.00119569	1	0.014966	1	1	0.00271633
Aph1a	0.0283187	1	0.0447934	1	0.0103617	1	0.0270198	1	1	0.0276234
Aph1b	-0.00587073	1	0.00169721	1	-0.00629531	1	-0.00626922	1	1	-0.00418451
Api5	0.0420039	1	-0.00599783	1	-0.0219772	1	0.143215	1	1	0.0393109
Apip	0.0105571	1	0.0136377	1	-0.0234021	1	-0.0379677	1	1	-0.00929375
Aplf	0.00516556	1	-0.0103524	1	-0.00342907	1	-0.0132181	1	1	-0.0054585
Apln	-0.0350138	1	-0.0372674	1	-0.0515787	1	-0.0480997	1	1	-0.0429899
Aplp2	-0.0901579	1	0.175073	1	0.0741753	1	0.0429669	1	1	0.0505142
Apmap	-0.00146577	1	0.0163401	1	0.0217173	1	0.000271156	1	1	0.0092157
Apobec3	0.0140692	1	0.0551958	1	0.03818	1	0.000309154	1	1	0.0269386
Apobr	0.0135051	1	0.0880992	1	-0.0361153	1	-0.0324136	1	1	0.00826885
Apoe	0.130138	1	-0.0817768	1	0.0603272	1	-0.0813612	1	1	0.00683193
Apol10b	-0.0349216	1	-0.00357308	1	0.00547527	1	0.0396892	1	1	0.00166744
Apol6	-0.0123715	1	-0.00371961	1	-0.0132019	1	-0.0151812	1	1	-0.0111186
Apol7a	-0.00272743	1	0.018261	1	0.0228193	1	0.0094163	1	1	0.0119423
Apol8	-0.00310399	1	0.0175419	1	0.00618536	1	-0.00325554	1	1	0.00434193
Apol9a	-0.0459012	1	0.119596	1	0.113389	1	0.0310276	1	1	0.0545278
Apol9b	-0.0649522	1	0.0456143	1	0.103322	1	0.0343965	1	1	0.0295952
Apoo	0.0222465	1	-0.0920869	1	-0.00530712	1	-0.0586762	1	1	-0.0334559
Apool	0.043611	1	0.0136334	1	0.0271312	1	-0.0592394	1	1	0.00628404
Apopt1	0.00149125	1	0.0187398	1	0.0194961	1	0.0138174	1	1	0.0133861
App	0.0795509	1	0.142	1	0.0446197	1	0.0710402	1	1	0.0843027
Appbp2	0.0270877	1	0.0353685	1	0.00627412	1	0.0122153	1	1	0.0202364
Appl1	0.0932264	1	0.0841469	1	0.0420393	1	0.0249808	1	1	0.0610983
Appl2	0.00542061	1	-0.0115871	1	0.00157653	1	-0.0141211	1	1	-0.00467776
Aprt	-0.0487105	1	-0.122489	1	-0.0533249	1	-0.048782	1	1	-0.0683267
Aptx	0.00456945	1	-0.0194025	1	-0.0203598	1	-0.0223482	1	1	-0.0143853
Aqp11	0.00132407	1	-0.00369968	1	-0.00210232	1	-0.00410322	1	1	-0.00214528
Aqp3	-0.0206853	1	-0.0183688	1	-0.0100202	1	-0.00133479	1	1	-0.0126023
Aqr	-0.00177273	1	0.0156256	1	-0.0555109	1	0.084188	1	1	0.0106325
Araf	0.0242479	1	0.0385296	1	-0.0326934	1	0.037834	1	1	0.0169795
Arap1	-0.00736699	1	-0.000794089	1	0.00303916	1	-0.00781979	1	1	-0.00323543
Arap2	-0.0483017	1	0.103562	1	0.0129574	1	-0.0791958	1	1	-0.00274458
Arcn1	-0.0407433	1	-0.00187698	1	-0.00715938	1	-0.146418	1	1	-0.0490493
Areg	-0.352594	1	-0.219687	1	-0.155987	1	0.0660694	1	1	-0.16555
Arel1	0.0101624	1	0.0326337	1	-0.02306	1	0.000204298	1	1	0.00498509
Arf1	0.0227234	1	-0.0389051	1	0.0238573	1	-0.026671	1	1	-0.00474886
Arf2	0.0448666	1	0.101747	1	0.00246716	1	0.0523988	1	1	0.0503698
Arf3	0.0405803	1	0.0392578	1	0.0153236	1	0.178012	1	1	0.0682933
Arf4	0.0280243	1	0.122461	1	0.097287	1	0.150514	1	1	0.0995715
Arf5	0.043419	1	-0.155448	1	0.0314597	1	-0.00699619	1	1	-0.0218912
Arf6	0.0084492	1	-0.0210126	1	-0.053583	1	-0.1964	1	1	-0.0656366
Arfgap1	-0.00440568	1	-0.00421229	1	-0.0187372	1	-0.0216638	1	1	-0.0122547
Arfgap2	0.029208	1	-0.0396612	1	0.00350547	1	-0.0323389	1	1	-0.00982165
Arfgap3	-0.00629929	1	0.00816775	1	-0.00434465	1	0.00586157	1	1	0.000846346
Arfgef1	0.00426402	1	0.0386178	1	0.00918909	1	-0.0449848	1	1	0.00177153
Arfgef2	0.0142006	1	0.0363614	1	0.0110664	1	-0.0418449	1	1	0.00494587
Arfip1	0.0160899	1	-0.0100342	1	-0.00158664	1	0.0406444	1	1	0.0112784
Arfip2	0.027379	1	0.0201249	1	0.002258	1	-0.0641515	1	1	-0.00359741
Arfrp1	0.0275435	1	0.0832326	1	0.00240969	1	-0.048084	1	1	0.0162755
Arg2	-0.00118072	1	-0.0547419	1	-0.00397512	1	0.0477298	1	1	-0.003042
Arglu1	-0.00780666	1	-0.00724305	1	-0.0872576	1	-0.250804	1	1	-0.0882778
Arhgap1	-0.0292373	1	0.0302314	1	0.017878	1	-0.0172322	1	1	0.000409977
Arhgap10	-0.0651943	1	-0.0369336	1	-0.0161732	1	0.00287172	1	1	-0.0288574
Arhgap11a	0.000728282	1	-0.00630259	1	0.00932802	1	-0.0367633	1	1	-0.00825239
Arhgap12	-0.0118332	1	0.0244965	1	0.026863	1	-0.0455104	1	1	-0.00149604
Arhgap17	0.0407876	1	0.00542141	1	-0.009075	1	-0.0170003	1	1	0.00503345
Arhgap18	0.0582444	1	-0.0435667	1	-0.0341465	1	0.0442007	1	1	0.00618297
Arhgap19	-0.00107469	1	-0.0115704	1	0.0158146	1	-0.000373152	1	1	0.000699086
Arhgap21	-0.0458558	1	-0.015102	1	-0.0493254	1	-0.0937446	1	1	-0.0510069
Arhgap22	0.0208368	1	-0.0502149	1	-0.0986045	1	-0.0266962	1	1	-0.0386697
Arhgap23	0.0618657	1	-0.0758625	1	-0.0156733	1	-0.000450178	1	1	-0.00753007
Arhgap26	-0.0276547	1	0.0279833	1	0.0253833	1	-0.0224109	1	1	0.000825265
Arhgap27	-0.00932466	1	-0.000350706	1	0.00199583	1	0.0283205	1	1	0.00516025
Arhgap27os1	0.027496	1	-0.0260131	1	-0.00567642	1	-0.00931072	1	1	-0.00337606
Arhgap28	0.0206828	1	0.00594859	1	-0.0221564	1	0.0228383	1	1	0.00682833
Arhgap29	-0.0920057	1	-0.00406576	1	-0.0445659	1	-0.00796251	1	1	-0.03715
Arhgap31	-0.0526788	1	-0.0086541	1	0.000415541	1	0.00438506	1	1	-0.0141331
Arhgap32	0.0372532	1	0.0430428	1	0.0177466	1	0.0568587	1	1	0.0387253
Arhgap35	0.014572	1	0.0245979	1	-0.0168442	1	0.0340757	1	1	0.0141004
Arhgap39	-0.00137155	1	0.000669408	1	0.0146203	1	-0.0106451	1	1	0.000818266
Arhgap42	0.0134201	1	0.0733764	1	0.0117357	1	0.0205085	1	1	0.0297602
Arhgap45	0.0154279	1	-0.041134	1	0.00993234	1	0.106606	1	1	0.0227082
Arhgap5	-0.109886	1	0.0425263	1	-0.171547	0.0432273	-0.0420296	1	0.615613	-0.0702339
Arhgap6	0.0935441	1	0.0729203	1	0.0493218	1	0.0526972	1	1	0.0671208
Arhgap8	-0.0166675	1	0.0377373	1	-0.0128575	1	0.0506462	1	1	0.0147146
Arhgdia	0.0762286	1	0.0234248	1	-0.0243597	1	0.0607824	1	1	0.034019
Arhgdib	-0.0128619	1	-0.0636146	1	-0.0343285	1	-0.0337487	1	1	-0.0361384
Arhgdig	-0.0311728	1	0.0387257	1	0.0701736	1	0.147508	1	1	0.0563086
Arhgef1	0.0286607	1	0.00995097	1	-0.00666487	1	0.0643015	1	1	0.0240621
Arhgef10l	0.0388888	1	-0.0173014	1	-0.0195115	1	-0.020424	1	1	-0.00458701
Arhgef11	-0.0256035	1	0.0305018	1	0.00227422	1	-0.09166	1	1	-0.0211219
Arhgef12	-0.0452212	1	0.062639	1	-0.00891943	1	-0.116624	1	1	-0.0270314
Arhgef15	-0.00854701	1	-0.00741207	1	0.00128352	1	-0.000537988	1	1	-0.00380339
Arhgef16	0.00868415	1	-0.00733159	1	0.0461001	0.341121	-0.000960766	1	0.976028	0.011623
Arhgef17	0.0341122	1	-0.0345671	1	-0.0116487	1	-0.0473053	1	1	-0.0148522
Arhgef18	0.00211709	1	-0.0267074	1	-0.00980355	1	-0.0364006	1	1	-0.0176986
Arhgef19	0.0140207	1	0.00157575	1	-0.0420632	1	-0.00573879	1	1	-0.00805139
Arhgef2	0.0742442	1	0.110668	1	-0.0305251	1	-0.0298804	1	1	0.0311268
Arhgef25	-0.0283027	1	0.130352	1	0.0343267	1	0.0317217	1	1	0.0420244
Arhgef28	0.0023183	1	0.0212554	1	0.00463297	1	0.0564406	1	1	0.0211618
Arhgef3	0.000395152	1	-0.0198483	1	-0.0147699	1	-0.0149915	1	1	-0.0123036
Arhgef40	0.0193338	1	0.0325883	1	-0.020706	1	-0.00816062	1	1	0.00576388
Arhgef5	-0.0687305	1	0.0233356	1	-0.0178172	1	-0.0874154	1	1	-0.0376569
Arhgef7	-0.0380675	1	-0.0157802	1	-0.0244109	1	0.00727476	1	1	-0.017746
Arid1a	0.0205408	1	0.0179419	1	0.0391446	1	0.0456501	1	1	0.0308194
Arid1b	0.0394621	1	0.0118456	1	-0.0287327	1	-0.0133562	1	1	0.00230471
Arid2	0.0249118	1	0.0429436	1	-0.0326552	1	0.00889043	1	1	0.0110227
Arid3a	-0.0258447	1	0.000489014	1	-0.0246635	1	-0.00644089	1	1	-0.014115
Arid4a	0.0243467	1	0.0348079	1	-0.0269739	1	-0.0320226	1	1	3.95193e-05
Arid4b	0.115465	1	0.0447953	1	0.0155367	1	-0.0430933	1	1	0.0331759
Arid5a	0.103616	1	0.0697365	1	-0.0225356	1	-0.0293712	1	1	0.0303615
Arid5b	-0.0353702	1	0.0694726	1	-0.0420462	1	0.0360177	1	1	0.00701847
Arih1	0.00522549	1	0.00533964	1	-0.00420614	1	0.0716645	1	1	0.0195059
Arih2	0.0475553	1	0.00058902	1	-0.0273126	1	0.0439988	1	1	0.0162076
Arl1	-0.141211	1	0.0405901	1	-0.0266368	1	-0.00426536	1	1	-0.0328808
Arl10	-0.0153585	1	0.0135341	1	-0.000991944	1	0.0124581	1	1	0.00241044
Arl13b	-0.025827	1	-0.124902	1	0.0105955	1	-0.112229	1	1	-0.0630905
Arl14ep	-0.00240857	1	0.0431371	1	-0.0204358	1	0.0157105	1	1	0.0090008
Arl15	0.0158275	1	-0.0171388	1	-0.00227817	1	-0.010162	1	1	-0.00343785
Arl16	0.0211514	1	0.00498666	1	0.0102736	1	0.0453674	1	1	0.0204448
Arl2	0.145896	1	-0.0251334	1	0.0541246	1	0.0237042	1	1	0.0496479
Arl2bp	0.0257092	1	-0.0741578	1	-0.00597923	1	-0.0628766	1	1	-0.0293261
Arl3	0.140923	1	-0.00851344	1	0.0226895	1	-0.0589651	1	1	0.0240335
Arl4a	0.0548472	1	-0.0170494	1	-0.0396597	1	-0.0984353	1	1	-0.0250743
Arl4c	0.100676	1	0.150337	1	-0.00496722	1	0.0154903	1	1	0.065384
Arl5a	0.0125359	1	-0.00669956	1	-0.00373083	1	-0.050073	1	1	-0.0119919
Arl5b	0.0699939	1	0.042386	1	0.043187	1	0.0269995	1	1	0.0456416
Arl6	0.028392	1	-0.000446023	1	-0.0013419	1	-0.0370403	1	1	-0.00260905
Arl6ip1	-0.0475827	1	0.132087	1	0.192541	1	-0.0238477	1	1	0.0632995
Arl6ip4	-0.0752724	1	-0.0132568	1	0.0319876	1	-0.0265406	1	1	-0.0207705
Arl6ip5	0.0405136	1	0.0212169	1	-0.00603439	1	0.0414964	1	1	0.0242981
Arl6ip6	0.00415036	1	0.0475586	1	0.0403221	1	-0.0277263	1	1	0.0160762
Arl8a	0.0852939	1	0.00313087	1	-0.0203869	1	-0.0120674	1	1	0.0139926
Arl8b	0.0160021	1	-0.0525782	1	-0.0241932	1	-0.0572293	1	1	-0.0294997
Armc1	-0.0530809	1	0.00135749	1	-0.0266584	1	0.0415961	1	1	-0.00919643
Armc10	-0.0024847	1	-0.00838689	1	0.0147172	1	-0.017319	1	1	-0.00336835
Armc3	0.020446	1	0.0598205	1	0.00666402	1	-0.00281153	1	1	0.0210297
Armc5	-0.00457228	1	0.0225017	1	-0.0145456	1	0.00944277	1	1	0.00320663
Armc6	-0.00316269	1	-0.0133142	1	-0.011991	1	-0.0289656	1	1	-0.0143584
Armc8	0.00199383	1	0.0149667	1	-0.00895962	1	-0.0168295	1	1	-0.00220715
Armc9	-0.00355228	1	0.0437227	1	0.0156116	1	0.105998	1	1	0.040445
Armcx5	-0.00924486	1	0.00214928	1	-0.00720852	1	0.049073	1	1	0.00869223
Armt1	-0.01352	1	-0.0819033	1	0.0313478	1	-0.00621287	1	1	-0.0175721
Arnt	-0.00144576	1	-0.0989278	1	-0.00848353	1	-0.0413367	1	1	-0.0375484
Arntl	0.0112661	1	0.0143923	1	-0.0130789	1	0.00526954	1	1	0.00446225
Arntl2	0.00159912	1	-0.125656	1	-0.0653632	1	-0.0549418	1	1	-0.0610904
Arpc1a	-0.0310106	1	-0.0393051	1	-0.0278914	1	0.00503564	1	1	-0.0232929
Arpc1b	-0.0116726	1	0.0518864	1	-0.103143	1	0.0423573	1	1	-0.00514291
Arpc2	0.124635	1	0.0947674	1	0.0588246	1	0.067868	1	1	0.0865237
Arpc3	0.0362132	1	-0.0578634	1	-0.0403719	1	0.107687	1	1	0.0114162
Arpc4	0.0308786	1	-0.037872	1	-0.00739052	1	-0.0972297	1	1	-0.0279034
Arpc5	0.0485321	1	0.00316438	1	-0.00820596	1	-0.0845111	1	1	-0.0102551
Arpc5l	-0.0238808	1	-0.0095798	1	0.0251419	1	0.04452	1	1	0.00905034
Arpin	0.00554139	1	-0.0657869	1	0.00857138	1	-0.0603287	1	1	-0.0280007
Arpp19	-0.00027574	1	-0.0034707	1	0.0840188	1	-0.124695	1	1	-0.0111056
Arrb2	0.0357321	1	-0.0109452	1	-0.00281932	1	0.0100043	1	1	0.00799296
Arrdc1	0.0221149	1	-0.0272907	1	0.0207892	1	0.0477349	1	1	0.0158371
Arrdc2	0.0200877	1	-0.00760532	1	-0.00480142	1	0.00478644	1	1	0.00311685
Arrdc3	-0.0270975	1	0.00325912	1	-0.0175221	1	-0.0228687	1	1	-0.0160573
Arrdc4	0.0606061	1	-0.0194644	1	-0.00236891	1	-0.0421315	1	1	-0.000839671
Arsa	0.0407748	1	0.022221	1	0.0532983	1	-0.00552799	1	1	0.0276915
Arsb	0.0135618	1	-0.00413209	1	0.00932282	1	-0.00227459	1	1	0.00411949
Arsk	0.00816962	1	0.00339072	1	-0.00256164	1	0.00745567	1	1	0.00411359
Artn	0.0746463	1	0.0294278	1	-0.0125622	1	0.0244378	1	1	0.0289874
Arv1	0.00382924	1	0.00932211	1	-0.0115457	1	-0.0259771	1	1	-0.00609287
Arvcf	-0.00465763	1	0.0252419	1	-0.0145172	1	-0.022399	1	1	-0.00408296
As3mt	-0.00164969	1	-0.0038857	1	-0.00782622	1	-0.0552266	1	1	-0.017147
Asah1	-0.0319273	1	-0.108161	1	-0.0121199	1	-0.103012	1	1	-0.0638053
Asah2	0.00304374	1	0.0102625	1	6.65234e-05	1	0.0187735	1	1	0.00803655
Asap1	0.0827515	1	0.0912768	1	0.0840594	1	0.159139	1	1	0.104307
Asap2	-0.094485	1	-0.0889028	1	-0.0234576	1	-0.0502037	1	1	-0.0642623
Asap3	-0.0142219	1	0.00999899	1	-0.00619679	1	-0.00598844	1	1	-0.00410203
Asb13	0.0194761	1	-0.00311827	1	0.00991411	1	0.0466813	1	1	0.0182383
Asb3	0.027055	1	-0.0549143	1	-0.00693444	1	0.0425732	1	1	0.00194486
Asb6	0.0177453	1	-0.0223451	1	-0.0298551	1	-0.0166326	1	1	-0.0127719
Asb7	0.0184036	1	0.0189382	1	0.00622694	1	-0.00903613	1	1	0.00863314
Asb8	-0.00631137	1	-0.000886242	1	0.00490941	1	-0.019731	1	1	-0.00550479
Ascc1	-0.0289796	1	0.00196088	1	-0.00163612	1	0.0506401	1	1	0.00549633
Ascc2	0.0252014	1	-0.0105405	1	0.00222881	1	-0.0565983	1	1	-0.00992712
Ascc3	-0.0547525	1	0.129818	1	-0.0368812	1	-0.119276	1	1	-0.0202729
Asf1a	-0.0312107	1	-0.0874245	1	0.0208703	1	-0.0678956	1	1	-0.0414151
Asf1b	0.00244937	1	-0.0254838	1	-0.00638948	1	-0.00196729	1	1	-0.0078478
Ash1l	-0.0431905	1	0.153644	1	-0.0841319	1	-0.0153797	1	1	0.00273559
Ash2l	-0.0234985	1	-0.0779856	1	-0.0237614	1	-0.159762	1	1	-0.0712519
Asl	-0.016092	1	-0.0188671	1	-0.0256544	1	-0.015396	1	1	-0.0190024
Asna1	-0.034423	1	-0.078488	1	-0.0838772	1	-0.055346	1	1	-0.0630335
Asns	-0.0576415	1	0.0633065	1	0.0740451	1	0.144893	1	1	0.0561507
Asnsd1	0.0101307	1	0.00448203	1	0.0207056	1	-0.00377517	1	1	0.0078858
Asph	0.00489186	1	0.0471484	1	-0.02063	1	-0.0960159	1	1	-0.0161514
Aspm	0.00526223	1	0.0235174	1	0.00944714	1	-0.0623441	1	1	-0.00602934
Aspscr1	-0.0711923	1	0.0155091	1	-0.0302553	1	0.00532664	1	1	-0.020153
Asrgl1	-0.00623498	1	-0.0341364	1	-0.00162262	1	-0.0515165	1	1	-0.0233776
Ass1	-0.198607	0.0217493	-0.172712	1	-0.134529	1	0.00754583	1	0.467739	-0.124575
Aste1	-0.00848809	1	-0.0176524	1	0.0082258	1	-0.0120047	1	1	-0.00747987
Asxl1	0.0222246	1	0.0258372	1	0.0140594	1	0.0166406	1	1	0.0196904
Asxl2	-0.040766	1	0.0227222	1	-0.0444197	1	-0.00495532	1	1	-0.0168547
Atad1	0.0383244	1	0.0224171	1	0.0168462	1	-0.0426253	1	1	0.00874062
Atad2	0.0190457	1	0.142606	1	0.0786353	1	0.0318629	1	1	0.0680375
Atad2b	0.0381177	1	-0.00384056	1	-0.0223148	1	-0.0630517	1	1	-0.0127723
Atad3a	-0.0118111	1	0.0497462	1	-0.027506	1	0.012784	1	1	0.00580327
Atad5	0.0317053	1	0.035141	1	0.0522054	1	0.0635433	1	1	0.0456488
Atat1	0.054832	1	0.0262829	1	-0.0242898	1	-0.0196248	1	1	0.00930006
Ate1	0.0255915	1	0.0211567	1	-0.00932034	1	-0.0382839	1	1	-0.000213999
Atf1	-0.0243101	1	0.0480973	1	-0.014219	1	-0.0494112	1	1	-0.00996074
Atf2	0.0394918	1	0.0324536	1	0.000335253	1	0.00706265	1	1	0.0198358
Atf3	-0.33033	1	0.00536685	1	-0.0392546	1	-0.145629	1	1	-0.127462
Atf4	-0.0208463	1	0.00372075	1	-0.0367536	1	0.0326066	1	1	-0.00531815
Atf5	-0.0187279	1	0.0152961	1	0.0168335	1	0.0387397	1	1	0.0130353
Atf6	-0.0545904	1	0.0301573	1	-0.0208126	1	-0.0734347	1	1	-0.0296701
Atf6b	-1.30308e-05	1	-0.0251894	1	-0.0198416	1	-0.0269323	1	1	-0.0179941
Atf7	0.00595146	1	-0.00640807	1	-0.0192032	1	-0.00544251	1	1	-0.00627558
Atf7ip	0.0215989	1	-0.00585793	1	-0.00809846	1	-0.0377141	1	1	-0.0075179
Atg10	-0.0130444	1	-0.00881632	1	-0.00461462	1	-0.0219598	1	1	-0.0121088
Atg101	0.00703105	1	0.0520238	1	0.0128372	1	-0.0242835	1	1	0.0119021
Atg12	-0.0203093	1	0.0199626	1	0.025039	1	-0.128412	1	1	-0.0259298
Atg13	-0.022312	1	-0.00858892	1	0.00440031	1	-0.0492964	1	1	-0.0189492
Atg14	-0.0102313	1	-0.00134902	1	0.000940191	1	-0.0183046	1	1	-0.00723619
Atg16l1	0.00751413	1	0.00566171	1	-0.012576	1	-0.0177356	1	1	-0.00428394
Atg16l2	0.000864835	1	-0.0103616	1	0.0126812	1	-0.0228585	1	1	-0.0049185
Atg2a	0.00720378	1	0.0104727	1	0.0175478	1	0.0997194	1	1	0.0337359
Atg2b	0.0170564	1	0.00211195	1	-0.0146912	1	0.0137404	1	1	0.00455438
Atg3	0.0254347	1	-0.095292	1	0.00282011	1	-0.0500063	1	1	-0.0292609
Atg4a	0.00103009	1	0.00743912	1	-0.00892987	1	-0.0110417	1	1	-0.00287558
Atg4b	0.00886374	1	-0.023413	1	-0.00617233	1	0.030665	1	1	0.00248585
Atg4c	-0.00615209	1	0.0205112	1	-0.0151415	1	0.00447592	1	1	0.000923383
Atg4d	0.0227321	1	0.0049082	1	-0.024059	1	-0.015068	1	1	-0.00287169
Atg5	-0.0357749	1	0.0285242	1	-0.0333944	1	-0.06542	1	1	-0.0265163
Atg7	-0.0198706	1	-0.00219641	1	-0.0162346	1	0.0502714	1	1	0.00299245
Atg9a	0.0164867	1	-0.0286199	1	-0.0194885	1	-0.00162215	1	1	-0.00831099
Atg9b	-0.0566536	1	-0.0545353	1	-0.0428789	1	-0.0511274	1	1	-0.0512988
Atic	0.082082	1	0.0630042	1	0.0367949	1	0.10715	1	1	0.0722577
Atl1	0.00260845	1	0.00864576	1	0.00881586	1	-0.00719602	1	1	0.00321851
Atl2	0.00770612	1	0.000191519	1	-0.0311619	1	0.00401098	1	1	-0.00481332
Atl3	-0.000384448	1	-0.0127038	1	0.0235032	1	0.112858	1	1	0.0308182
Atm	0.0173815	1	0.0135775	1	0.020052	1	-0.0110425	1	1	0.0099921
Atmin	-0.0143137	1	-0.00283623	1	-0.0207262	1	-0.0309592	1	1	-0.0172088
Atn1	0.050172	1	0.0066378	1	0.00469082	1	0.149028	1	1	0.0526322
Atox1	0.116736	1	0.0414494	1	0.0071669	1	-0.0606524	1	1	0.026175
Atp10a	-0.00489967	1	0.00758108	1	0.0124504	1	0.00718142	1	1	0.0055783
Atp11a	-0.0627374	1	-0.000921483	1	-0.0980158	1	-0.137359	1	1	-0.0747585
Atp11b	0.0236815	1	0.076993	1	0.034512	1	-0.0834417	1	1	0.0129362
Atp11c	0.0213431	1	0.0124373	1	-0.0204589	1	-0.0201617	1	1	-0.00171004
Atp13a1	-0.0251571	1	-0.0266313	1	-0.0494381	1	-0.0175606	1	1	-0.0296968
Atp13a2	-0.00566454	1	0.00519411	1	0.00971336	1	-0.0193185	1	1	-0.0025189
Atp13a3	0.0516727	1	0.130849	1	-0.00252806	1	-0.13734	1	1	0.0106634
Atp1a1	-0.041053	1	-0.0262385	1	-0.0820409	1	-0.196783	1	1	-0.0865289
Atp1b1	0.0346152	1	-0.00993575	1	-0.00672928	1	-0.00223761	1	1	0.00392815
Atp1b3	-0.031375	1	-0.0189252	1	0.0133486	1	-0.016106	1	1	-0.0132644
Atp23	-0.000921061	1	-0.039902	1	0.00970972	1	-0.0408451	1	1	-0.0179896
Atp2a2	-0.00808699	1	0.100294	1	0.0050658	1	-0.0838426	1	1	0.00335748
Atp2b1	-0.10604	1	0.0258954	1	-0.0409244	1	0.0977431	1	1	-0.00583152
Atp2c1	-0.0742463	1	0.0261642	1	-0.0288949	1	-0.0446956	1	1	-0.0304181
Atp2c2	-0.0290667	1	0.0074849	1	-0.00379651	1	-0.0134442	1	1	-0.00970563
Atp5a1	-0.0386636	1	-0.037964	1	0.101195	1	-0.12313	1	1	-0.0246407
Atp5b	-0.152483	1	-0.0249489	1	0.0232048	1	-0.0358674	1	1	-0.0475237
Atp5c1	-0.00751834	1	-0.0274864	1	0.0198613	1	0.073105	1	1	0.0144904
Atp5d	-0.169961	1	-0.0526781	1	0.031231	1	0.0283883	1	1	-0.040755
Atp5e	0.0854943	1	0.018365	1	0.0272229	1	0.0967008	1	1	0.0569457
Atp5f1	-0.021882	1	0.016048	1	0.0486682	1	0.123561	1	1	0.0415987
Atp5g1	0.0328317	1	-0.0139453	1	0.0319159	1	0.0238116	1	1	0.0186535
Atp5g2	-0.0833812	1	0.0162057	1	0.0916342	1	0.101028	1	1	0.0313718
Atp5g3	0.0541717	1	0.00702314	1	0.0120607	1	-0.0371396	1	1	0.00902897
Atp5h	0.0241262	1	-0.0994668	1	-0.0106957	1	-0.0465974	1	1	-0.0331584
Atp5j	0.0785586	1	-0.0258451	1	0.0569304	1	0.0473653	1	1	0.0392523
Atp5j2	0.107453	1	0.0562491	1	0.0132499	1	0.0462034	1	1	0.0557889
Atp5k	0.123304	1	0.0216004	1	0.046248	1	-0.0319244	1	1	0.039807
Atp5l	-0.0137569	1	-0.111482	1	-0.0138637	1	-0.0127643	1	1	-0.0379668
Atp5o.1	0.0310272	1	-0.0381744	1	0.0254701	1	0.0218997	1	1	0.0100557
Atp5s	0.0190852	1	0.0151726	1	-0.000470632	1	-0.013586	1	1	0.00505029
Atp6ap1	-0.0194414	1	0.0148338	1	-0.00587477	1	-0.0488172	1	1	-0.0148249
Atp6ap2	0.0307558	1	-0.0595555	1	0.00578273	1	-0.0487154	1	1	-0.0179331
Atp6v0a1	-0.0341177	1	-0.00132802	1	-0.0492409	1	-0.0345227	1	1	-0.0298023
Atp6v0a2	-0.00424722	1	0.0115936	1	-0.0153666	1	-0.00746662	1	1	-0.00387171
Atp6v0b	0.0359239	1	-0.000304907	1	-0.00201415	1	-0.0646877	1	1	-0.00777072
Atp6v0c	-0.0125753	1	-0.0103845	1	-0.0130521	1	0.0367606	1	1	0.000187181
Atp6v0d1	-0.0168194	1	-0.00976281	1	-0.0424662	1	0.0754809	1	1	0.00160812
Atp6v0e	-0.00649385	1	-0.0330804	1	-0.0107059	1	-0.0158367	1	1	-0.0165292
Atp6v1a	0.0135762	1	0.0230668	1	-0.00227193	1	0.0105897	1	1	0.0112402
Atp6v1b2	-0.00847108	1	-0.0545559	1	-0.0911733	1	0.00189244	1	1	-0.0380769
Atp6v1c1	0.0328073	1	-0.0680924	1	0.0168433	1	-0.0699579	1	1	-0.0220999
Atp6v1d	0.0283742	1	0.0715789	1	-0.0520073	1	-0.130006	1	1	-0.0205151
Atp6v1e1	0.0387659	1	0.0132696	1	-0.0183863	1	-0.0512524	1	1	-0.00440078
Atp6v1f	0.0868256	1	-0.0135209	1	0.00709815	1	0.00426633	1	1	0.0211673
Atp6v1g1	-0.0409875	1	-0.0904056	1	-0.0592446	1	0.0255567	1	1	-0.0412703
Atp6v1h	0.0714564	1	-0.0348338	1	0.00898676	1	0.00709598	1	1	0.0131763
Atp7a	-0.0103976	1	0.0213024	1	-0.017942	1	-0.013242	1	1	-0.00506978
Atp8a1	-0.00974201	1	-0.00604216	1	0.00134159	1	-0.018083	1	1	-0.0081314
Atp8b2	0.0338887	1	0.0192267	1	0.0274589	1	0.000109827	1	1	0.020171
Atp9a	0.0448853	1	0.0206636	1	0.0126278	1	0.0186398	1	1	0.0242041
Atp9b	-0.0314736	1	-0.0133416	1	0.0080831	1	-0.00902337	1	1	-0.0114389
Atpaf1	-0.0242279	1	-0.0197392	1	-0.00807797	1	-0.0130463	1	1	-0.0162729
Atpaf2	0.000447183	1	-0.0147645	1	0.0117073	1	0.0269645	1	1	0.00608862
Atpif1	0.140014	1	-0.0714025	1	0.0217902	1	0.0479693	1	1	0.0345926
Atr	0.00285449	1	0.0410926	1	-0.0167033	1	-0.0116794	1	1	0.00389109
Atraid	0.0917781	1	-0.0620283	1	0.0147151	1	-0.0961857	1	1	-0.0129302
Atrip	-0.000775272	1	0.0266245	1	0.0127424	1	-0.0214131	1	1	0.00429465
Atrn	-0.0182291	1	-6.85621e-05	1	-0.01958	1	-0.0031544	1	1	-0.010258
Atrnl1	-0.00911768	1	0.0123156	1	-0.012002	1	-0.00965114	1	1	-0.00461381
Atrx	0.0261364	1	0.181483	1	-0.0535766	1	-0.104584	1	1	0.0123647
Atxn1	-0.0252396	1	0.00391311	1	-0.000667879	1	-0.00474519	1	1	-0.00668489
Atxn10	0.0496231	1	0.0672903	1	0.066059	1	0.0320507	1	1	0.0537558
Atxn1l	-0.0230609	1	-0.00525617	1	-0.0329619	1	-0.00874079	1	1	-0.0175049
Atxn2	0.0576756	1	0.0604065	1	0.010274	1	-0.0797532	1	1	0.0121507
Atxn2l	0.0252527	1	0.0293361	1	-0.0386324	1	-0.0224596	1	1	-0.0016258
Atxn3	-0.0203835	1	-0.112625	1	-0.0470714	1	-0.0075717	1	1	-0.046913
Atxn7	-0.0361741	1	-0.0192027	1	-0.0178114	1	-0.0155277	1	1	-0.022179
Atxn7l1	-0.0202164	1	0.0378533	1	-0.0124234	1	0.0548773	1	1	0.0150227
Atxn7l2	-0.0222718	1	-0.0171954	1	-0.0304097	1	-0.0145595	1	1	-0.0211091
Atxn7l3	0.0218318	1	-0.00454743	1	-0.0252553	1	-0.0563822	1	1	-0.0160883
Atxn7l3b	-0.0694662	1	0.0069362	1	0.0611669	1	-0.0455296	1	1	-0.0117232
AU019823	0.0360273	1	-0.0186978	1	0.0185313	1	0.0193447	1	1	0.0138014
AU020206	-0.0196839	1	0.00588348	1	0.0240334	1	-0.00600232	1	1	0.00105768
AU022252	0.00324614	1	0.00741671	1	-0.0373296	1	-0.00962137	1	1	-0.00907203
AU040320	-0.00322479	1	0.0172217	1	-0.026028	1	-0.0157605	1	1	-0.00694791
AU041133	-0.012558	1	0.00682932	1	0.00493005	1	-0.000743525	1	1	-0.000385548
Auh	0.094137	1	-0.0411002	1	0.00811594	1	-0.0331817	1	1	0.00699273
Aunip	0.0178925	1	0.0128801	1	0.0116197	1	0.0285714	1	1	0.0177409
Aup1	-0.0319934	1	-0.021609	1	-0.001838	1	0.0102306	1	1	-0.0113025
Aurka	-0.0405281	1	0.00054916	1	0.00958602	1	-0.0323831	1	1	-0.015694
Aurkaip1	0.026925	1	-0.0784483	1	0.0324065	1	0.0319188	1	1	0.00320048
Aurkb	0.0535857	1	0.00256822	1	0.0465316	1	-0.0727121	1	1	0.00749336
AV099323	-0.000690174	1	0.000312487	1	-0.000131771	1	0.000392845	1	1	-2.91533e-05
Aven	-0.0068694	1	0.00330005	1	0.00904214	1	-0.0225498	1	1	-0.00426925
Avl9	0.0396307	1	0.0175591	1	-0.036747	1	0.0689188	1	1	0.0223404
Avpi1	0.138235	1	-0.022254	1	0.0517674	1	0.140682	1	1	0.0771077
AW112010	-0.0572694	1	0.0468431	1	0.104081	1	0.173494	1	1	0.0667871
AW209491	-0.0153037	1	-0.00873136	1	-0.00749479	1	-0.0234747	1	1	-0.0137512
AW549877	-0.0202974	1	0.00769571	1	-0.0098448	1	-0.0529392	1	1	-0.0188464
AW554918	-0.0156994	1	0.0163835	1	0.0225752	1	-0.0189316	1	1	0.00108194
Axin1	0.06761	1	-0.0379342	1	-0.0225164	1	-0.0242153	1	1	-0.00426395
Axl	0.0962209	1	0.0706716	1	0.00880705	1	-0.0453312	1	1	0.0325921
AY036118	0.0214445	1	-0.0834862	1	0.00975297	1	-0.115994	1	1	-0.0420708
Azi2	0.0203063	1	0.0286673	1	0.0026322	1	0.0613645	1	1	0.0282426
Azin1	-0.0187689	1	0.187939	1	0.0174037	1	0.0778703	1	1	0.0661109
Azin2	-0.0443194	1	0.0194286	1	-0.069532	1	-0.0819522	1	1	-0.0440938
B230118H07Rik	-0.00699173	1	-0.0108463	1	-0.00638608	1	-0.0329294	1	1	-0.0142884
B230208H11Rik	-0.00758165	1	0.00298748	1	-0.00218028	1	-0.0135884	1	1	-0.00509071
B230219D22Rik	0.0133517	1	0.0651226	1	0.00100108	1	0.0807576	1	1	0.0400583
B230307C23Rik	-0.0115466	1	-0.0546574	1	-0.00707749	1	-0.0107841	1	1	-0.0210164
B230354K17Rik	-0.0001316	1	-0.0013606	1	-0.00831889	1	0.0112523	1	1	0.000360298
B230369F24Rik	-0.0204794	1	0.00697592	1	-0.019398	1	-0.020834	1	1	-0.0134339
B2m	-0.128467	1	-0.047121	1	-0.00755523	1	-0.192129	1	1	-0.0938181
B3galnt2	-0.00135655	1	0.0162698	1	0.0121244	1	0.0138175	1	1	0.0102138
B3galt6	-0.0253682	1	-0.0467425	1	-0.00165444	1	-0.05142	1	1	-0.0312963
B3gat3	0.0796766	1	0.0198455	1	0.00233262	1	-0.0683552	1	1	0.00837491
B3glct	0.0254275	1	0.0415119	1	-0.0209288	1	-0.0200967	1	1	0.00647849
B3gnt2	-0.0234473	1	0.0767717	1	-0.000179557	1	-0.0142928	1	1	0.00971302
B3gnt3	-0.0472538	1	0.00365466	1	-0.00191573	1	-0.0183916	1	1	-0.0159766
B4galnt1	0.00349795	1	-0.0620204	1	0.00570693	1	-0.00341104	1	1	-0.0140567
B4galnt4	0.0119641	1	-0.00061186	1	0.00251395	1	-0.0141152	1	1	-6.22394e-05
B4galt1	-0.0576568	1	-0.0431798	1	-0.00412146	1	0.0340865	1	1	-0.0177179
B4galt2	0.0361162	1	0.00714592	1	0.0257566	1	0.0604458	1	1	0.0323661
B4galt3	-0.0301652	1	-0.0299742	1	-0.0694924	1	-0.0350182	1	1	-0.0411625
B4galt4	-0.00555844	1	0.00332347	1	-0.00746518	1	-0.00980755	1	1	-0.00487692
B4galt5	-0.00499165	1	-0.0131612	1	-0.0118437	1	-0.0425249	1	1	-0.0181304
B4galt6	0.0222348	1	0.00729651	1	0.003166	1	-0.0122987	1	1	0.00509966
B4galt7	0.000205827	1	-0.0144366	1	0.00639759	1	-0.00611818	1	1	-0.00348783
B4gat1	0.0435698	1	0.0144039	1	0.0413371	1	0.0978213	1	1	0.049283
B630019K06Rik	-0.00809423	1	-0.0115314	1	-0.00398818	1	-0.00917169	1	1	-0.00819638
B930036N10Rik	0.0853999	1	0.0412013	1	-0.0355559	1	-0.0698742	1	1	0.00529278
B9d1	-0.0113188	1	0.064527	1	0.0425608	1	-0.0213402	1	1	0.0186072
B9d2	0.0419954	1	0.0233048	1	0.0111544	1	-0.0213589	1	1	0.0137739
Babam1	0.0146389	1	-0.0502535	1	-0.0540505	1	-0.0539719	1	1	-0.0359093
Babam2	0.0546652	1	0.00182252	1	0.0243326	1	0.2155	1	1	0.0740802
Bace1	0.0250117	1	0.111916	1	-0.0381996	1	-0.0777282	1	1	0.00524995
Bach1	0.0401786	1	0.0545969	1	-0.0376413	1	-0.00012649	1	1	0.0142519
Bad	0.110962	1	0.0782438	1	0.0443679	1	0.0475542	1	1	0.070282
Bag1	-0.0577542	1	-0.0292481	1	-0.012353	1	0.0386026	1	1	-0.0151882
Bag2	0.0467988	1	-0.0100788	1	-7.95422e-05	1	0.0307008	1	1	0.0168353
Bag3	0.0734078	1	-0.00271343	1	-0.0234493	1	-0.00718691	1	1	0.0100145
Bag4	0.0545887	1	0.0183822	1	-0.0141165	1	-0.037124	1	1	0.00543262
Bag5	-0.00893687	1	0.0548252	1	-0.0225179	1	-0.0248691	1	1	-0.000374664
Bag6	0.0271391	1	-0.0320232	1	0.000216939	1	0.0493805	1	1	0.0111783
Bahd1	0.00226728	1	-0.0069795	1	0.006844	1	-0.00369325	1	1	-0.000390368
Baiap2	0.018497	1	-0.0206329	1	-0.0417305	1	-0.0592771	1	1	-0.0257859
Baiap2l1	-0.0131937	1	0.0351183	1	0.00168898	1	0.0302072	1	1	0.0134552
Bak1	-0.0119367	1	0.0970664	1	0.00484943	1	0.029629	1	1	0.029902
Banf1	0.160649	1	0.0142681	1	0.0775854	1	-0.00535418	1	1	0.0617872
Banp	-0.0292739	1	0.065617	1	-0.0171728	1	0.0747043	1	1	0.0234687
Bap1	0.0126419	1	-0.0176573	1	-0.00550212	1	-0.0559594	1	1	-0.0166192
Bard1	0.0170363	1	0.0198298	1	0.00970589	1	-0.00183136	1	1	0.0111852
Basp1	-0.0893395	1	0.0810237	1	-0.0226805	1	0.141851	1	1	0.0277136
Batf2	-0.0176544	1	0.00211115	1	-0.00912478	1	-0.0191438	1	1	-0.0109529
Batf3	-0.0238831	1	-0.0149228	1	-0.0104005	1	-0.0625648	1	1	-0.0279428
Bax	0.0732361	1	-0.0433925	1	0.10717	1	-0.129864	1	1	0.00178744
Baz1a	0.0079829	1	0.00739416	1	-0.0323743	1	0.0695682	1	1	0.0131427
Baz1b	0.0669293	1	0.0748225	1	0.0109286	1	-0.0964131	1	1	0.0140668
Baz2a	-0.0156576	1	0.030769	1	-0.066862	1	0.0313868	1	1	-0.00509096
Baz2b	0.0781916	1	0.00201274	1	-0.0478291	1	-0.110985	1	1	-0.0196525
Bbc3	0.0529512	1	0.0999324	1	0.0359996	1	-0.0277741	1	1	0.0402773
Bbip1	0.152372	0.346771	-0.0247177	1	0.00584704	1	-0.0553639	1	0.977173	0.0195343
Bbs12	-0.00254702	1	0.00264659	1	0.0168975	1	0.000586395	1	1	0.00439588
Bbs2	0.00866813	1	-0.0114259	1	-0.00599977	1	-0.0211414	1	1	-0.00747471
Bbs4	0.0617994	1	-0.0162875	1	-0.0175374	1	-0.0123392	1	1	0.00390882
Bbs5	-0.0196554	1	-0.00935355	1	-0.0211975	1	0.00110109	1	1	-0.0122764
Bbs7	0.00163851	1	0.0120314	1	-0.0111588	1	-0.0253115	1	1	-0.00570012
Bbs9	-0.0114749	1	0.0106631	1	-0.00564089	1	0.0222671	1	1	0.00395358
Bbx	-0.00422252	1	-0.0752574	1	-0.0825267	1	-0.0261386	1	1	-0.0470363
BC002059	0.0212505	1	-0.00721902	1	-0.011285	1	0.0313776	1	1	0.00853104
BC003331	0.001921	1	-0.0328649	1	-0.0105215	1	0.0399474	1	1	-0.000379493
BC003965	0.0220054	1	0.0226676	1	0.00124362	1	-0.0452003	1	1	0.000179081
BC004004	-0.00552404	1	-0.0447993	1	-0.059051	1	0.0425878	1	1	-0.0166966
BC005537	0.00406218	1	-0.0794213	1	-0.0957604	1	-0.144086	1	1	-0.0788013
BC005561	0.00838681	1	0.0441955	1	-0.0584405	1	-0.0458196	1	1	-0.0129195
BC005624	0.0336702	1	0.0170269	1	-0.00501331	1	0.121132	1	1	0.041704
BC017158	0.00169086	1	0.0153191	1	-0.00159646	1	-0.00336402	1	1	0.00301238
BC017643	0.0175836	1	0.00797724	1	-0.0249476	1	-0.0169443	1	1	-0.00408275
BC022687	0.000621292	1	-0.0238631	1	0.00763291	1	-0.00773506	1	1	-0.00583598
BC024978	0.00810773	1	0.010757	1	0.014067	1	-0.00478889	1	1	0.0070357
BC029722	0.0342842	1	-0.0128959	1	0.0130293	1	-0.0326059	1	1	0.000452934
BC030867	0.000988963	1	0.0012551	1	0.0173329	1	0.0012956	1	1	0.00521815
BC031181	0.00171841	1	0.00550195	1	-0.0347658	1	-0.00954647	1	1	-0.00927298
BC037034	-0.00556028	1	-0.00166109	1	-0.00469713	1	-0.00546059	1	1	-0.00434477
BC052040	0.0144739	1	-0.0051384	1	0.00748698	1	0.149775	1	1	0.0416495
BC055324	0.00414342	1	-0.00660852	1	0.00413192	1	-0.0270536	1	1	-0.00634669
BC100530	0.0221269	1	0.0820202	1	-0.00799015	1	-0.0749363	1	1	0.00530516
Bcam	0.0150981	1	0.0279259	1	0.00465894	1	0.0182115	1	1	0.0164736
Bcap29	-0.0339305	1	-0.0204497	1	0.00133417	1	0.0173593	1	1	-0.00892168
Bcap31	0.0271382	1	-0.0369453	1	-0.0152397	1	-0.00451518	1	1	-0.00739047
Bcar1	0.0453676	1	-0.0326893	1	-0.0373059	1	0.0227555	1	1	-0.000468012
Bcar3	-0.027823	1	-0.0259263	1	0.00969856	1	-0.0102725	1	1	-0.0135808
Bcas2	-0.0119024	1	0.0523221	1	0.0727419	1	0.149239	1	1	0.0656001
Bcas3	0.00530105	1	-0.00434994	1	-0.0140518	1	0.095887	1	1	0.0206966
Bcat2	0.00559059	1	-0.00759867	1	-0.00358712	1	-0.0369734	1	1	-0.0106422
Bccip	0.08663	1	-0.0117322	1	0.0335078	1	-0.0694845	1	1	0.00973025
Bcdin3d	0.000198205	1	0.001959	1	-0.00411318	1	0.0101161	1	1	0.00204002
Bckdha	0.0454752	1	-0.0367782	1	-0.0166496	1	-0.0664488	1	1	-0.0186004
Bckdhb	0.0304304	1	-0.00701874	1	-0.0179237	1	-0.0263513	1	1	-0.00521583
Bckdk	0.0191314	1	-0.00063964	1	0.00354268	1	-0.0100697	1	1	0.00299117
Bcl10	0.0486868	1	0.0787727	1	0.0382699	1	-0.00186448	1	1	0.0409662
Bcl11a	-0.0268259	1	0.010075	1	0.0124944	1	-0.0192032	1	1	-0.00586494
Bcl2	-0.00233583	1	0.0312989	1	-0.0119655	1	-0.0322517	1	1	-0.00381354
Bcl2l1	-0.00738961	1	0.0143076	1	0.0748347	1	-0.0549803	1	1	0.00669309
Bcl2l11	0.141262	1	-0.0167137	1	-0.000301017	1	0.0454887	1	1	0.0424339
Bcl2l12	0.0415166	1	-0.00732972	1	-0.001627	1	0.0535635	1	1	0.0215308
Bcl2l13	0.014562	1	0.00467936	1	-0.0224084	1	-0.0199137	1	1	-0.00577017
Bcl2l2	-0.0337759	1	-0.0163085	1	-0.000890459	1	0.00466512	1	1	-0.0115774
Bcl3	0.0684315	1	0.085449	1	-0.00187777	1	-0.0200815	1	1	0.0329803
Bcl6	0.00944279	1	0.0565672	1	-0.0432761	1	0.00785974	1	1	0.0076484
Bcl7a	0.0325929	1	-0.00576854	1	0.0107004	1	-0.0271342	1	1	0.00259764
Bcl7b	0.0470433	1	-0.0730394	1	-0.00819291	1	0.00597729	1	1	-0.00705293
Bcl7c	0.0350015	1	-0.0242471	1	0.0672167	1	0.0167883	1	1	0.0236898
Bcl9	0.013435	1	-0.0384826	1	-0.011317	1	0.111491	1	1	0.0187817
Bcl9l	0.0587507	1	0.0132627	1	-0.0655507	1	-0.0176516	1	1	-0.00279721
Bclaf1	-0.12442	1	0.0859033	1	-0.0222907	1	-0.0772379	1	1	-0.0345114
Bclaf3	-0.00837403	1	0.0165235	1	-0.016656	1	-0.0497065	1	1	-0.0145533
Bcor	0.0224908	1	0.0103875	1	0.00948498	1	-0.0183334	1	1	0.00600747
Bcorl1	0.0421756	1	0.00767014	1	-0.0205992	1	-0.0213539	1	1	0.00197314
Bcr	-0.0617008	1	0.0197457	1	-0.0272537	1	0.0159203	1	1	-0.0133221
Bcs1l	0.00323596	1	0.0232825	1	0.0190702	1	0.0671546	1	1	0.0281858
Bdkrb2	0.00509066	1	0.00805563	1	-0.0239942	1	-0.00232896	1	1	-0.00329422
Bdnf	0.169894	1	0.0240683	1	0.00756231	1	-0.0364867	1	1	0.0412595
Bdp1	0.00447226	1	0.0396649	1	-0.0249022	1	0.0175789	1	1	0.00920347
Becn1	0.0432123	1	-0.0338166	1	-0.0297189	1	-0.0417706	1	1	-0.0155234
Bend3	0.0156625	1	0.0130372	1	-4.58327e-06	1	0.00957847	1	1	0.00956839
Bend4	-0.00785944	1	0.00646678	1	-0.00560075	1	-0.0210164	1	1	-0.00700245
Bend5	0.00196274	1	0.0417859	1	-0.0926465	1	-0.0974226	1	1	-0.0365801
Bend6	-0.0220741	1	-0.000421305	1	-0.00165	1	0.00181597	1	1	-0.00558237
Bet1	0.0320846	1	-0.0132178	1	0.0135611	1	-0.0248767	1	1	0.00188782
Bet1l	0.0289338	1	-0.0156391	1	0.00153579	1	-0.0855279	1	1	-0.0176743
Bex3	0.0314516	1	-0.0663281	1	-0.0237405	1	-0.0664955	1	1	-0.0312781
Bfar	0.0201992	1	-0.00282252	1	-0.0143676	1	-0.00861357	1	1	-0.00140114
Bgn	-0.0455684	1	0.00398131	1	-0.002561	1	0.0898206	1	1	0.0114181
Bhlhe40	0.0352933	1	0.049336	1	-0.118032	1	-0.0659621	1	1	-0.0248412
Bhlhe41	0.0341521	1	-0.0376044	1	-0.0962113	0.0910675	-0.0680014	1	0.779526	-0.0419163
Bicd1	0.0295687	1	0.0219454	1	-0.000153769	1	-0.0049251	1	1	0.0116088
Bicd2	0.0035179	1	0.0226491	1	0.0246417	1	0.0342687	1	1	0.0212694
Bicra	0.0107037	1	0.0119091	1	0.00503984	1	0.0343799	1	1	0.0155081
Bicral	-0.00485929	1	0.00274676	1	-0.00748062	1	-0.0275953	1	1	-0.00929711
Bid	0.0584303	1	0.0122154	1	0.00112755	1	-0.047686	1	1	0.00602182
Bin1	-0.210577	1	-0.00953949	1	0.0472984	1	-0.0150469	1	1	-0.0469663
Bin3	0.00587694	1	0.0451956	1	-0.00943205	1	0.0260185	1	1	0.0169148
Birc2	0.0330738	1	0.039637	1	0.0029613	1	-0.065909	1	1	0.00244078
Birc3	-0.0239911	1	0.0355426	1	0.0121696	1	-0.0100455	1	1	0.0034189
Birc5	0.0808814	1	0.100316	1	0.178935	1	-0.0394981	1	1	0.0801587
Birc6	-0.0208142	1	0.0370366	1	-0.0757083	1	-0.0639347	1	1	-0.0308552
Bivm	0.0192797	1	0.00290509	1	0.00430969	1	-0.00855479	1	1	0.00448493
Blcap	-0.0118887	1	-0.00688005	1	-0.00579683	1	-0.0160812	1	1	-0.0101617
Blm	0.0307769	1	0.0245693	1	0.0283661	1	-0.00405646	1	1	0.019914
Blmh	0.027285	1	0.0404048	1	-0.0199732	1	-0.0679475	1	1	-0.00505772
Bloc1s1	0.0027082	1	-0.0893085	1	0.000535075	1	-0.0137109	1	1	-0.024944
Bloc1s2	0.0420992	1	-0.077139	1	0.0142238	1	-0.0715981	1	1	-0.0231035
Bloc1s3	0.00297127	1	-0.0485681	1	-0.00724859	1	-0.0137487	1	1	-0.0166485
Bloc1s4	0.0424035	1	-0.00473466	1	0.0248658	1	-0.0169019	1	1	0.0114082
Bloc1s5	-0.00985411	1	-0.0176792	1	-0.0190606	1	-0.023124	1	1	-0.0174295
Bloc1s6	-0.0149356	1	-0.0596836	1	0.0419072	1	0.0184996	1	1	-0.00355308
Blvra	-0.0410761	1	-0.00759308	1	-0.0109836	1	-0.0379239	1	1	-0.0243941
Blvrb	0.0240131	1	0.0194017	1	-0.0592501	1	-0.0312317	1	1	-0.0117667
Blzf1	-0.00410174	1	-0.0286446	1	-0.0435847	1	0.00763831	1	1	-0.0171732
Bmi1	-0.0183039	1	0.0249908	1	-0.0258823	1	-0.0653716	1	1	-0.0211418
Bmp1	0.026978	1	0.119769	1	0.00260936	1	0.0417625	1	1	0.0477797
Bmp2k	0.00968992	1	0.0712564	1	-0.0253934	1	0.109673	1	1	0.0413066
Bmp7	-0.184687	1.28238e-05	-0.113157	1	-0.103474	0.00853574	-0.0895854	1	9.10375e-05	-0.122726
Bmpr1a	0.0630548	1	-0.0136506	1	0.0132887	1	0.056486	1	1	0.0297947
Bmpr2	0.0356949	1	0.0521946	1	-0.0146372	1	-0.0303295	1	1	0.0107307
Bms1	0.00887903	1	-0.00600945	1	-0.0110546	1	-0.069269	1	1	-0.0193635
Bmt2	0.01945	1	0.0166837	1	-0.00733748	1	0.00394503	1	1	0.00818532
Bmyc	-0.00498042	1	-0.0295976	1	-0.0441877	1	0.00255189	1	1	-0.0190535
Bnc1	-0.0284652	1	-0.0637694	1	-0.0364372	1	0.00541381	1	1	-0.0308145
Bnip1	-0.0195694	1	0.112834	1	-0.0152591	1	0.013806	1	1	0.0229528
Bnip2	-0.0276067	1	-0.0272666	1	0.0142932	1	0.0553593	1	1	0.0036948
Bnip3	-0.124009	1	0.0327863	1	-0.128619	1	0.125283	1	1	-0.0236396
Bnip3l	-0.015719	1	0.0341065	1	-0.0264264	1	-0.00469246	1	1	-0.00318284
Bod1	-0.0327091	1	0.0102554	1	0.0289114	1	-0.04202	1	1	-0.00889056
Bod1l	-0.02392	1	0.0971866	1	-0.0488262	1	-0.0606152	1	1	-0.00904368
Bok	0.0255717	1	-0.0881106	1	0.00532161	1	-0.0329051	1	1	-0.0225306
Bola1	-0.057142	1	-0.00477914	1	0.0194344	1	0.0264726	1	1	-0.00400356
Bola2	0.128983	1	-0.0481452	1	0.070465	1	0.0830026	1	1	0.0585764
Bola3	-0.00952771	1	0.068792	1	-0.000297327	1	-0.14081	1	1	-0.0204608
Bop1	-0.000487204	1	0.0442063	1	-0.0175922	1	-0.0235811	1	1	0.000636457
Bora	-0.00275081	1	0.00849698	1	0.0148268	1	-0.0363666	1	1	-0.0039484
Borcs5	0.0169361	1	-0.0152622	1	-0.00985571	1	0.00277637	1	1	-0.00135135
Borcs6	0.00302447	1	-0.0235898	1	-0.0289947	1	-0.0176352	1	1	-0.0167988
Borcs7	-0.0193508	1	0.0496286	1	-0.0223222	1	-0.0553793	1	1	-0.0118559
Borcs8	-0.0431182	1	-0.109106	1	-0.0560555	1	0.0322379	1	1	-0.0440103
Bpgm	-0.00742564	1	-0.0487449	1	-0.0304369	1	-0.0314918	1	1	-0.0295248
Bphl	0.0683506	1	-0.0624073	1	0.0290978	1	0.000461824	1	1	0.00887572
Bpnt1	-0.018848	1	-0.0128002	1	-0.0441723	1	-0.0372105	1	1	-0.0282577
Bptf	-0.0124656	1	0.0553858	1	-0.0593943	1	-0.0480519	1	1	-0.0161315
Braf	0.0125169	1	-0.00175697	1	-0.0153743	1	-0.0151961	1	1	-0.00495261
Brap	-0.00813337	1	0.049007	1	0.017405	1	-0.0654744	1	1	-0.00179896
Brat1	0.00855732	1	-0.0150747	1	-0.00534678	1	-0.0143949	1	1	-0.00656475
Brca1	0.0227468	1	0.0011807	1	0.034788	1	-0.00279853	1	1	0.0139793
Brca2	0.000949349	1	0.0258613	1	0.0311324	1	-0.00803718	1	1	0.0124765
Brcc3	0.0240598	1	-0.0773119	1	-0.0396441	1	0.0365242	1	1	-0.014093
Brd1	0.0515902	1	0.109267	1	0.0383345	1	-0.0393336	1	1	0.0399644
Brd2	-0.106283	1	0.036917	1	-0.0935656	1	-0.0406193	1	1	-0.0508878
Brd3	0.0114256	1	0.115158	1	0.00127874	1	0.00753229	1	1	0.0338487
Brd4	0.010783	1	-0.0534332	1	-0.0631987	1	-0.0892221	1	1	-0.0487678
Brd7	-0.00906334	1	-0.0437663	1	-0.0402875	1	-0.0712722	1	1	-0.0410974
Brd8	-0.0264271	1	0.0207772	1	0.0275385	1	-0.0933443	1	1	-0.0178639
Brd9	0.0340488	1	-0.0148568	1	0.0124035	1	-0.0975206	1	1	-0.0164813
Brf1	0.0294598	1	0.000624732	1	-0.00393131	1	-0.0312459	1	1	-0.00127317
Brf2	-0.0244085	1	0.0188623	1	-0.0203229	1	-0.0159858	1	1	-0.0104637
Bri3	0.0263999	1	0.0565224	1	0.0555981	1	0.146099	1	1	0.0711547
Bri3bp	0.100385	1	-0.0283688	1	0.00905922	1	-0.0118684	1	1	0.0173017
Brip1	0.0202099	1	-0.0219298	1	0.00951086	1	0.00697411	1	1	0.00369125
Brip1os	0.0325293	1	-0.0475822	1	0.0221952	1	0.00170452	1	1	0.00221169
Brix1	0.107644	1	0.0957921	1	0.0192554	1	0.0472003	1	1	0.0674729
Brk1	0.0215362	1	0.0252562	1	0.00220323	1	-0.0668425	1	1	-0.00446172
Brms1	0.0973898	1	-0.0048046	1	-0.00108252	1	0.0447534	1	1	0.034064
Brms1l	-0.0276735	1	-0.0053559	1	0.0176515	1	-0.0203273	1	1	-0.00892629
Brox	-0.00303213	1	-0.0427623	1	-0.066087	1	-0.00619018	1	1	-0.0295179
Brpf1	-0.00664427	1	0.0383925	1	-0.0292096	1	-0.0442794	1	1	-0.0104352
Brpf3	0.0207639	1	0.0250678	1	0.00305542	1	-0.00577041	1	1	0.0107792
Brsk1	-0.0169061	1	0.0178183	1	-0.0184342	1	0.0181659	1	1	0.000160957
Brwd1	-0.00920487	1	0.0646797	1	-0.020633	1	-0.052219	1	1	-0.00434429
Brwd3	0.0303449	1	-0.0154181	1	-0.0334844	1	-0.0214399	1	1	-0.00999937
Bscl2	0.0238922	1	0.0801805	1	0.0154863	1	-0.000675557	1	1	0.0297209
Bsdc1	-0.0136288	1	-0.00251275	1	-0.0193336	1	-0.00057508	1	1	-0.00901256
Bsg	-0.287607	0.793366	0.0173078	1	-0.0490702	1	0.0838722	1	0.999901	-0.0588744
Bsn	-0.00386888	1	0.00387499	1	-0.00226448	1	-0.0084477	1	1	-0.00267652
Bst2	-0.301148	1	-0.122083	1	0.029302	1	-0.163844	1	1	-0.139443
Btaf1	0.0116123	1	0.095707	1	-0.0220886	1	-0.0207976	1	1	0.0161083
Btbd1	-0.00776395	1	0.0140308	1	-0.00936548	1	-0.0480133	1	1	-0.012778
Btbd10	0.0281873	1	0.0196608	1	0.00494571	1	-0.00601994	1	1	0.0116934
Btbd11	-0.00272416	1	-0.037434	1	-0.00200886	1	0.0148753	1	1	-0.00682291
Btbd19	-0.018729	1	0.00790711	1	-0.0029699	1	-0.00486568	1	1	-0.00466437
Btbd2	0.0125686	1	-0.00321616	1	0.0153195	1	-0.0208081	1	1	0.000965956
Btbd3	-0.0226423	1	-0.0241367	1	-0.0144344	1	-0.0137584	1	1	-0.018743
Btbd6	0.0254836	1	-0.00655068	1	0.00240595	1	0.129201	1	1	0.0376348
Btbd7	-0.00486264	1	0.0622546	1	-0.0921514	1	-0.026498	1	1	-0.0153144
Btbd9	0.0503552	1	0.0149344	1	-0.0490123	1	-0.0509655	1	1	-0.00867205
Btd	-0.00585181	1	-0.00343128	1	0.0282519	1	0.0253179	1	1	0.0110717
Btf3	-0.0540191	1	-0.0531043	1	0.0682055	1	0.101747	1	1	0.0157074
Btf3l4	0.00555961	1	-0.043786	1	-0.00453219	1	-0.0340535	1	1	-0.019203
Btg1	-0.180077	1	-0.0595259	1	-0.132299	1	-0.114748	1	1	-0.121662
Btg2	-0.234136	1	0.114843	1	0.0640043	1	-0.0279261	1	1	-0.0208037
Btg3	0.112042	1	-0.0197133	1	-0.0031196	1	-0.0819821	1	1	0.00180671
Btrc	0.025083	1	0.0102723	1	0.0130262	1	-0.0274454	1	1	0.00523403
Bub1	0.00738673	1	0.168746	1	0.0310039	1	-0.042213	1	1	0.0412308
Bub1b	-0.0322335	1	0.0195279	1	0.0198477	1	-0.0295384	1	1	-0.00559908
Bub3	0.132715	1	0.0607004	1	0.0840901	1	-0.0242149	1	1	0.0633226
Bud13	-0.00129123	1	-0.0133571	1	-0.00441167	1	-0.00662179	1	1	-0.00642044
Bud23	-0.0143091	1	-0.00689676	1	-0.00030898	1	-0.0469063	1	1	-0.0171053
Bud31	0.0395725	1	-0.0125696	1	0.0257542	1	-0.0639558	1	1	-0.00279968
Bvht	-0.00955608	1	-0.0112771	1	-0.0171	1	0.00220968	1	1	-0.00893088
Bysl	-0.0445015	1	0.0186747	1	-0.00799385	1	-0.0277209	1	1	-0.0153854
Bzw1	0.107231	1	0.0352437	1	0.0445892	1	0.00408881	1	1	0.0477883
Bzw2	0.0269218	1	-0.153015	1	-0.0271841	1	-0.0118032	1	1	-0.0412702
C030006K11Rik	0.00726576	1	0.00852273	1	-0.00663238	1	0.00286175	1	1	0.00300446
C130071C03Rik	0.0129036	1	-0.0164069	1	0.00613651	1	0.00422569	1	1	0.00171473
C1d	0.0338766	1	-0.0188025	1	0.00357737	1	-0.0171662	1	1	0.000371328
C1galt1	0.0241934	1	0.0393259	1	0.0287046	1	-0.0120648	1	1	0.0200398
C1galt1c1	0.000304794	1	-0.00605878	1	-0.0104811	1	-0.0743309	1	1	-0.0226415
C1qbp	0.0363463	1	-0.0371387	1	0.041729	1	0.0593661	1	1	0.0250757
C1qtnf1	-0.00547502	1	-0.0404521	1	-0.0126705	1	0.108592	1	1	0.0124985
C1qtnf12	-0.00466863	1	-0.019024	1	-0.00504314	1	0.0316347	1	1	0.000724753
C1qtnf6	0.00832331	1	-0.00758959	1	-0.00192217	1	-0.00420152	1	1	-0.00134749
C1ra	-0.0326698	1	-0.0254023	1	-0.0217445	1	-0.03453	1	1	-0.0285867
C1rb	-0.017694	1	-0.0142924	1	-0.0152447	1	-0.0469727	1	1	-0.023551
C1s1	0.00677016	1	0.0089747	1	-0.0160203	1	-0.0319501	1	1	-0.00805638
C230037L18Rik	0.0119248	1	-0.0322135	1	-0.00827026	1	0.00434922	1	1	-0.00605242
C2cd2l	0.00767087	1	0.00611414	1	-0.0135302	1	-0.00323036	1	1	-0.000743882
C2cd3	-0.0103649	1	0.0107742	1	0.0219472	1	0.0323448	1	1	0.0136753
C2cd5	-0.00471221	1	-0.0103703	1	-0.0162555	1	-0.0309964	1	1	-0.0155836
C3	-0.235466	1	-0.1658	1	-0.0978891	1	-0.00856013	1	1	-0.126929
C330007P06Rik	-0.000775437	1	0.00835915	1	0.00457215	1	-0.0204105	1	1	-0.00206366
C330018D20Rik	0.0108225	1	0.00421068	1	-0.000663478	1	-0.0133017	1	1	0.000267013
C330027C09Rik	0.0189318	1	0.0621805	1	0.0189967	1	-0.00595133	1	1	0.0235394
C430042M11Rik	0.0105877	1	-0.00474514	1	0.0133822	1	-0.0017036	1	1	0.00438028
C4b	0.0535711	1	0.000784665	1	-0.00503155	1	-0.0713923	1	1	-0.00551701
C730034F03Rik	-0.00409949	1	-0.0233885	1	-0.010422	1	0.0112155	1	1	-0.00667363
C77080	-0.00698701	1	0.0285291	1	-0.0791574	1	-0.0780921	1	1	-0.0339269
C87436	-0.012168	1	0.0169084	1	-0.00801117	1	0.00184241	1	1	-0.000357082
CAAA01118383.1	-0.0389875	1	0.0145355	1	-0.0150887	1	-0.00803924	1	1	-0.011895
CAAA01147332.1	-0.0086851	1	0.018928	1	-1.96938e-05	1	-0.00984111	1	1	9.55248e-05
Caap1	0.016152	1	-0.029578	1	-0.03907	1	-0.0228515	1	1	-0.0188369
Cab39	-0.0137115	1	0.111347	1	0.0145595	1	0.0796054	1	1	0.0479502
Cab39l	0.011606	1	0.0231378	1	0.00987223	1	-0.0709218	1	1	-0.00657643
Cabin1	-0.00888793	1	0.0293492	1	-0.0144059	1	-0.0396125	1	1	-0.00838929
Cables2	0.0191662	1	0.0277546	1	0.0238378	1	-0.00619676	1	1	0.0161405
Cacfd1	0.0105256	1	0.00183494	1	-0.0191169	1	-0.0141087	1	1	-0.00521626
Cacna1a	0.0115462	1	-0.0156585	1	0.0100971	1	-0.0405022	1	1	-0.00862933
Cacnb3	0.00405587	1	-0.00136293	1	0.00774474	1	0.0611105	1	1	0.0178871
Cactin	0.00904549	1	-0.00630075	1	0.00147828	1	0.109028	1	1	0.0283128
Cacul1	0.0122191	1	0.0435646	1	0.000901493	1	0.0504379	1	1	0.0267808
Cacybp	-0.0629438	1	-0.0558395	1	-0.0929402	1	-0.0338237	1	1	-0.0613868
Cad	0.0325584	1	-0.018283	1	-0.0252208	1	0.00585838	1	1	-0.00127175
Cadm4	-0.0221695	1	-0.00995758	1	0.00487646	1	-0.0198508	1	1	-0.0117754
Cadps2	-0.0189929	1	0.00397432	1	0.00738211	1	0.0196977	1	1	0.00301532
Calcoco1	0.039864	1	-0.00316734	1	-0.00961786	1	-0.0434772	1	1	-0.00409961
Cald1	0.0884411	1	0.100234	1	0.014264	1	-0.0707427	1	1	0.033049
Calhm2	-0.0136123	1	0.00574204	1	0.00101147	1	-0.00711465	1	1	-0.00349335
Calm1	0.0949083	1	0.00254121	1	-0.0199762	1	-0.000695771	1	1	0.0191944
Calm2	0.164924	1	-0.0784134	1	-0.0156757	1	-0.0152253	1	1	0.0139025
Calm3	-0.00593955	1	-0.012639	1	0.0354847	1	0.0337071	1	1	0.0126533
Calr	-0.0972034	1	-0.0583407	1	-0.00881164	1	-0.178824	1	1	-0.085795
Calr3	-0.00959549	1	-0.0375511	1	0.00356159	1	-0.00706481	1	1	-0.0126624
Calr4	-0.0335703	1	-0.0104477	1	-0.0127153	1	0.00555178	1	1	-0.0127954
Calu	-0.0285221	1	0.0307636	1	-0.0652716	1	-0.153851	1	1	-0.0542204
Camk1	0.00504333	1	-0.0399456	1	0.0342247	1	0.063496	1	1	0.0157046
Camk1d	0.0458967	0.545707	-0.0214541	1	-0.00669412	1	0.018996	1	0.996529	0.00918613
Camk2d	-0.0309195	1	0.0680752	1	-0.0585984	1	0.0615486	1	1	0.0100265
Camk2g	-0.0157631	1	-0.00332066	1	-0.00374489	1	-0.0150051	1	1	-0.00945845
Camk2n1	0.0741813	1	0.0220523	1	0.0341081	1	-0.00252674	1	1	0.0319538
Camk2n2	-0.0457945	1	-0.0753431	1	0.0157715	1	-0.0409198	1	1	-0.0365715
Camkk2	0.0645023	1	0.0591666	1	0.00286464	1	-0.0267421	1	1	0.0249479
Caml	0.0373815	1	0.0219093	1	-0.00203659	1	-0.0258376	1	1	0.00785415
Camsap1	0.066603	1	0.0624623	1	0.0155849	1	-0.0681196	1	1	0.0191326
Camsap2	0.0631797	1	-0.0355242	1	-0.00718814	1	-0.00656974	1	1	0.00347441
Camta1	-0.00167594	1	0.0546795	1	-0.0162033	1	0.0720733	1	1	0.0272184
Camta2	0.0165555	1	0.000200452	1	-0.0111725	1	-0.0166767	1	1	-0.00277328
Cand1	-0.0109148	1	0.109635	1	0.050649	1	-0.0189709	1	1	0.0325996
Cand2	0.0012714	1	-0.00660591	1	0.0100944	1	-0.0174851	1	1	-0.00318131
Cant1	0.0342654	1	-0.0413025	1	-0.00691544	1	0.0142815	1	1	8.2236e-05
Canx	0.115419	1	0.0270742	1	0.0191734	1	-0.0266503	1	1	0.033754
Cap1	-0.0177598	1	0.0340326	1	-0.0141009	1	-0.0183275	1	1	-0.00403889
Capg	-0.165732	1	0.00948438	1	-0.0105906	1	0.0165033	1	1	-0.0375837
Capn1	-0.0128485	1	0.0071122	1	-0.0218223	1	-0.0829228	1	1	-0.0276203
Capn10	0.035389	1	-0.0131699	1	0.0343768	1	-0.0154027	1	1	0.0102983
Capn15	-0.0038814	1	0.00930866	1	-0.0290223	1	-0.000654141	1	1	-0.00606228
Capn2	-0.051351	1	-0.0845283	1	-0.0999205	1	0.0242007	1	1	-0.0528998
Capn7	0.0131426	1	0.0254131	1	-0.00276533	1	-0.00152081	1	1	0.0085674
Capns1	0.0402019	1	-0.0550747	1	0.0780582	1	0.0199721	1	1	0.0207894
Caprin1	0.0807572	1	0.0330733	1	0.0152666	1	0.0598856	1	1	0.0472457
Caprin2	0.0095347	1	-0.00524335	1	0.00674004	1	0.0018467	1	1	0.00321952
Capza1	-0.05387	1	0.034985	1	-0.00930044	1	-0.00825546	1	1	-0.00911021
Capza2	-0.00192159	1	-0.0897338	1	-0.0682106	1	0.110624	1	1	-0.0123105
Capzb	0.0698766	1	-0.0158182	1	-0.0362553	1	0.0248064	1	1	0.0106524
Car12	-0.0519904	1	-0.0512668	1	-0.0912826	1	-0.0128032	1	1	-0.0518357
Car13	-0.0376974	1	-0.0604233	1	-0.0654619	1	-0.0337515	1	1	-0.0493335
Car5b	-0.0510317	1	-0.0195059	1	-0.0337992	1	-0.00696689	1	1	-0.0278259
Car9	-0.188758	1	-0.0133424	1	-0.0621963	1	-0.0345267	1	1	-0.0747059
Card10	0.00532604	1	-0.044651	1	-0.0122973	1	-0.0634499	1	1	-0.028768
Card19	-0.050472	1	-0.0326573	1	-0.00359549	1	-0.00306326	1	1	-0.022447
Card6	-0.0218711	1	-0.00439854	1	-0.0164736	1	-0.00622117	1	1	-0.0122411
Carf	-0.00475988	1	0.0145587	1	0.0064004	1	0.00407005	1	1	0.00506732
Carhsp1	-0.0330803	1	0.0419568	1	0.0647538	1	0.00596151	1	1	0.0198979
Carm1	0.00691478	1	-0.00847742	1	-0.0106194	1	0.00120946	1	1	-0.00274315
Carmil1	-0.00622416	1	0.00965121	1	-0.000181367	1	-0.0242671	1	1	-0.00525534
Carnmt1	0.057168	1	0.0781363	1	0.0361313	1	-0.0274075	1	1	0.036007
Cars	0.0215212	1	0.0564211	1	0.0672358	1	0.0892905	1	1	0.0586171
Cars2	0.0105381	1	-0.0296136	1	-0.0246739	1	0.0232673	1	1	-0.00512053
Casc3	0.0639379	1	0.0428815	1	-0.000340331	1	-0.0138375	1	1	0.0231604
Casc4	0.0573727	1	-0.0686933	1	-0.0267894	1	-0.0163028	1	1	-0.0136032
Casd1	0.0317406	1	0.0373109	1	0.0366194	1	0.0873927	1	1	0.0482659
Cask	-0.0674714	1	-0.0199063	1	0.0113118	1	-0.019977	1	1	-0.0240107
Caskin2	0.0046312	1	-0.013728	1	-0.0139976	1	-0.0445671	1	1	-0.0169154
Casp1	0.045361	1	-0.0400756	1	0.022757	1	-0.0384953	1	1	-0.00261324
Casp12	0.0236507	1	0.00464795	1	-0.0117083	1	0.00747243	1	1	0.0060157
Casp2	0.00290104	1	-0.00188823	1	-0.00128405	1	-0.0461432	1	1	-0.0116036
Casp3	-0.0819463	1	-0.118294	1	-0.0881189	1	-0.144675	1	1	-0.108259
Casp4	-0.00941811	1	-0.0102499	1	0.018215	1	-0.0429586	1	1	-0.0111029
Casp6	-0.0278073	1	0.011264	1	-0.0338436	1	0.00319498	1	1	-0.011798
Casp7	0.0246679	1	0.000713182	1	0.0233074	1	-0.0118878	1	1	0.00920017
Casp8	0.0259416	1	-0.0965726	1	0.0453356	1	0.0764547	1	1	0.0127898
Casp8ap2	0.000316649	1	0.00486943	1	0.00208791	1	-0.000136651	1	1	0.00178434
Casp9	0.0172568	1	-0.0115006	1	-0.00688194	1	0.00144386	1	1	7.95183e-05
Cast	-0.0282476	1	0.00890724	1	-0.0354305	1	-0.0329781	1	1	-0.0219372
Cat	0.0350579	1	0.0432454	1	0.0166144	1	0.112773	1	1	0.0519228
Cav1	0.00431045	1	-0.018313	1	-0.00113317	1	0.0142819	1	1	-0.000213462
Cav2	0.0183943	1	-0.0145722	1	0.00588871	1	-0.00929635	1	1	0.000103613
Cavin1	0.0990295	1	-0.000599084	1	0.0256404	1	0.00311808	1	1	0.0317972
Cavin2	0.262355	8.1194e-11	0.107762	1	0.167634	0.00808868	0.0941404	1	2.69359e-09	0.157973
Cavin3	-0.0419199	1	0.110891	1	0.151358	1	-0.0533241	1	1	0.0417511
Cbarp	-0.0210223	1	0.0155508	1	0.00733185	1	-0.0174089	1	1	-0.00388715
Cbfa2t2	0.00901711	1	0.020363	1	-0.00371889	1	-0.00743474	1	1	0.00455662
Cbfb	0.017369	1	-0.083872	1	-0.0156746	1	-0.0422136	1	1	-0.0310978
Cbl	0.0270473	1	0.0212145	1	-0.0375229	1	-0.00966583	1	1	0.000268277
Cblb	0.0415283	1	0.050467	1	-0.0721453	1	-0.0196923	1	1	3.94288e-05
Cblc	-0.0173932	1	0.0322709	1	0.0137453	1	-0.0303811	1	1	-0.000439529
Cbll1	0.0231467	1	0.0469567	1	-0.018545	1	-0.037856	1	1	0.0034256
Cbr1	-0.0428266	1	-0.110982	1	-0.0502637	1	-0.077356	1	1	-0.0703569
Cbr2	-0.0284584	1	-3.29827e-05	1	-0.0443707	1	0.00056463	1	1	-0.0180743
Cbr4	0.00671967	1	-0.0276306	1	-0.010174	1	0.0298812	1	1	-0.000300935
Cbwd1	0.00663217	1	0.024885	1	0.0162032	1	0.140253	1	1	0.0469935
Cbx1	0.0439483	1	0.156085	1	0.0515874	1	-0.0389142	1	1	0.0531767
Cbx2	0.0236137	1	-0.0118076	1	0.00725282	1	-0.00124354	1	1	0.00445385
Cbx3	0.114305	1	0.0698119	1	0.0159364	1	0.00428966	1	1	0.0510856
Cbx4	0.0679685	1	0.132806	1	0.00825379	1	-0.0609292	1	1	0.0370248
Cbx5	0.0242947	1	0.0421488	1	0.0272781	1	-0.00398092	1	1	0.0224352
Cbx6	-0.0107769	1	0.057269	1	-0.0279607	1	-0.0445466	1	1	-0.0065038
Cbx7	0.0138261	1	0.000256608	1	0.00626783	1	0.000986217	1	1	0.00533418
Cbx8	0.00308845	1	-0.000885139	1	0.00448497	1	-0.0277586	1	1	-0.00526757
Cby1	-0.00134147	1	0.0346701	1	0.0258391	1	0.0139865	1	1	0.0182885
Cc2d1a	-0.00809714	1	-0.0299598	1	0.022224	1	-0.00725943	1	1	-0.0057731
Cc2d1b	0.0324447	1	-0.0407742	1	-0.00545348	1	-0.0177377	1	1	-0.00788016
Cc2d2a	0.00854313	1	0.0462661	1	-0.0189418	1	-0.0233735	1	1	0.00312348
Ccar1	-0.0456277	1	0.170494	1	-0.0128413	1	-0.0947053	1	1	0.00432991
Ccar2	0.0092636	1	0.0231692	1	-0.0087847	1	-0.0024781	1	1	0.0052925
Ccbe1	-0.195953	0.913685	0.126566	1	-0.0200833	1	0.0638038	1	0.999997	-0.00641653
Ccdc102a	-0.00301321	1	0.00799449	1	-0.0305461	1	-0.00648406	1	1	-0.00801223
Ccdc107	-0.0448871	1	-0.0841651	1	-0.00814647	1	-0.0141378	1	1	-0.0378341
Ccdc112	-0.031364	1	0.00141313	1	-0.0286205	1	0.00775498	1	1	-0.0127041
Ccdc114	0.0387871	1	0.0130732	1	0.0343495	0.701517	0.00217371	1	0.999504	0.0220958
Ccdc115	-0.0103482	1	-0.0234422	1	-0.0239209	1	-0.0160217	1	1	-0.0184333
Ccdc117	-0.0166802	1	-0.02339	1	0.0110413	1	-0.0209392	1	1	-0.0124921
Ccdc12	-0.0781496	1	-0.113227	1	-0.0013971	1	-0.0863973	1	1	-0.0697927
Ccdc120	0.0039426	1	0.00673603	1	-0.00377059	1	-0.00670416	1	1	5.09665e-05
Ccdc122	0.0401916	1	0.0351305	1	-0.00773673	1	3.50946e-05	1	1	0.0169051
Ccdc124	-0.103763	1	-0.0503749	1	-0.027346	1	-0.0793284	1	1	-0.065203
Ccdc125	0.0185174	1	-0.00816883	1	0.00775319	1	-0.0192527	1	1	-0.000287739
Ccdc126	0.0130191	1	-0.00520293	1	-0.0192042	1	0.0334739	1	1	0.00552145
Ccdc127	-0.0277412	1	-0.00108132	1	-0.012781	1	-0.0422501	1	1	-0.0209634
Ccdc130	0.00104984	1	-0.0287814	1	-0.031626	1	-0.0209197	1	1	-0.0200693
Ccdc136	0.0138504	1	0.0223896	1	-0.026622	1	0.00439875	1	1	0.00350418
Ccdc137	0.0297877	1	0.00564129	1	-0.0104483	1	-0.0303514	1	1	-0.00134267
Ccdc138	-0.0204382	1	0.0109536	1	-0.000118031	1	-0.0153167	1	1	-0.00622985
Ccdc14	0.0102612	1	-0.00113785	1	-0.00110281	1	-0.013001	1	1	-0.00124511
Ccdc149	0.00544533	1	0.00874828	1	-0.000478697	1	-0.00812006	1	1	0.00139871
Ccdc15	0.0209712	1	0.0132363	1	0.0472369	1	0.153372	1	1	0.0587041
Ccdc157	0.0132328	1	-0.00226799	1	-0.00149563	1	-0.0184491	1	1	-0.00224498
Ccdc163	-0.0277131	1	0.0187323	1	0.0128352	1	0.0376359	1	1	0.0103726
Ccdc167	0.00910284	1	0.0397104	1	-0.00453666	1	-0.027596	1	1	0.00417016
Ccdc173	0.0179484	1	0.00982736	1	0.0117532	1	0.00878249	1	1	0.0120779
Ccdc174	0.0461864	1	-0.0706497	1	-0.0074584	1	-0.0923318	1	1	-0.0310634
Ccdc18	-0.00540583	1	0.00470181	1	-0.00305332	1	-0.039493	1	1	-0.0108126
Ccdc181	0.0113338	1	-0.0365364	1	-0.00782987	1	-0.0278273	1	1	-0.0152149
Ccdc186	0.0796415	1	0.121981	1	-0.0297632	1	0.103818	1	1	0.0689194
Ccdc189	0.00166063	1	-0.00737793	1	0.000859236	1	-0.00420584	1	1	-0.00226598
Ccdc191	0.0290581	1	-0.0112828	1	0.0276767	1	-0.0181672	1	1	0.0068212
Ccdc22	-0.00681625	1	0.0494637	1	0.0151716	1	-0.028292	1	1	0.00738176
Ccdc25	-0.0329759	1	-0.0490524	1	-0.0038705	1	-0.0300958	1	1	-0.0289986
Ccdc28a	-0.00742506	1	-0.0537768	1	-0.00287269	1	0.022156	1	1	-0.0104796
Ccdc28b	-0.0120359	1	-0.00318501	1	-0.0112125	1	0.00598415	1	1	-0.00511231
Ccdc32	0.0535489	1	-0.047096	1	-0.0199032	1	0.014374	1	1	0.000230911
Ccdc34	0.0398197	1	0.105305	1	0.0862281	1	-0.00117572	1	1	0.0575443
Ccdc43	-0.0060415	1	-0.0647245	1	0.00273167	1	-0.0185468	1	1	-0.0216453
Ccdc47	-0.0201702	1	0.107586	1	-0.0417642	1	-0.0745425	1	1	-0.00722266
Ccdc50	0.0184769	1	0.0533051	1	-0.0505773	1	-0.0546112	1	1	-0.00835163
Ccdc51	0.0148458	1	-0.00553597	1	-0.0063414	1	0.00491987	1	1	0.00197206
Ccdc57	-0.00960361	1	-0.00457902	1	-0.00656635	1	0.000189013	1	1	-0.00513999
Ccdc58	-0.00512558	1	-0.0895724	1	0.0176601	1	0.0600541	1	1	-0.00424594
Ccdc59	-0.0442617	1	0.150607	1	-0.00723255	1	-0.0154718	1	1	0.0209102
Ccdc6	-0.012891	1	0.015588	1	-0.01171	1	-0.0248379	1	1	-0.00846273
Ccdc61	0.00708378	1	0.0697312	1	0.00462852	1	0.02843	1	1	0.0274684
Ccdc66	-0.0423704	1	0.0405429	1	0.0246005	1	-0.00914746	1	1	0.00340637
Ccdc68	-0.0508382	1	0.0566771	1	-0.00303073	1	0.00930959	1	1	0.00302943
Ccdc71	0.000613788	1	0.0971375	1	-0.0070819	1	-0.0281063	1	1	0.0156408
Ccdc71l	-0.0201829	1	0.0603622	1	-0.00924539	1	-0.0238705	1	1	0.00176583
Ccdc77	-0.000157151	1	-0.00398553	1	-0.0027158	1	0.0333891	1	1	0.00663265
Ccdc82	0.0814666	1	0.0510844	1	0.0487047	1	-0.000803138	1	1	0.0451132
Ccdc84	0.0286334	1	0.0107979	1	-0.0133599	1	0.00598815	1	1	0.0080149
Ccdc85b	0.100567	1	0.0516007	1	0.0873343	1	0.0125169	1	1	0.0630046
Ccdc85c	0.032288	1	0.0433776	1	0.000950873	1	-0.00915274	1	1	0.0168659
Ccdc86	0.0895989	1	-0.00164069	1	0.0375271	1	0.051369	1	1	0.0442136
Ccdc88a	0.0192487	1	0.0764741	1	0.0136958	1	0.175946	1	1	0.0713413
Ccdc88c	0.00628054	1	0.0177524	1	-0.00598802	1	-0.0214347	1	1	-0.000847443
Ccdc9	0.0271692	1	0.0206157	1	0.00291174	1	-0.0805238	1	1	-0.00745678
Ccdc90b	-0.0060879	1	-0.0136263	1	-0.00669769	1	0.0109088	1	1	-0.00387578
Ccdc91	-0.0256353	1	-0.000489894	1	-0.000541777	1	0.0111858	1	1	-0.00387029
Ccdc92	-0.00388463	1	-0.00641332	1	0.00163755	1	-0.0351109	1	1	-0.0109428
Ccdc93	0.0123008	1	0.002846	1	0.00136356	1	-0.00136989	1	1	0.00378511
Ccdc94	-0.0032242	1	0.00292904	1	-0.0129506	1	-0.0154925	1	1	-0.00718457
Ccdc97	0.0168796	1	-0.00201813	1	-0.00374351	1	0.00209405	1	1	0.003303
Cchcr1	-0.0227239	1	0.0152293	1	-0.017969	1	-0.0323305	1	1	-0.0144485
Ccl2	0.606462	1	-0.252823	1	-0.399768	1	0.211993	1	1	0.041466
Ccl25	-0.00607331	1	0.0337169	1	-0.0395158	1	-0.0660713	1	1	-0.0194859
Ccl3	-0.041817	1	-0.0665147	1	0.00416015	1	-0.0366724	1	1	-0.035211
Ccl4	0.00221427	1	-0.0360175	1	-0.0488163	1	-0.127368	1	1	-0.0524969
Ccl5	-0.153774	1	-0.0748702	1	0.0525213	1	0.264997	1	1	0.0222185
Ccl6	0.00768178	1	-0.0279252	1	0.00841393	1	0.02489	1	1	0.00326512
Ccm2	0.0660301	1	-0.0106335	1	-0.0161729	1	-0.112107	1	1	-0.0182209
Ccna2	-0.0242058	1	0.0983627	1	0.0322691	1	-0.0603148	1	1	0.0115278
Ccnb1	-0.00233693	1	0.0719591	1	0.0354078	1	-0.0971532	1	1	0.00196918
Ccnb1ip1	0.00674922	1	0.0133712	1	-0.0169863	1	-0.0484712	1	1	-0.0113343
Ccnb2	0.100804	1	0.127538	1	0.0911573	1	-0.0786886	1	1	0.0602027
Ccnc	-0.0344746	1	0.0391029	1	0.00178495	1	-0.0526732	1	1	-0.011565
Ccnd1	-0.0365687	1	0.100164	1	0.0716712	1	-0.0993192	1	1	0.0089869
Ccnd2	-0.135354	1	-0.043879	1	-0.0835927	1	-0.0680806	1	1	-0.0827265
Ccnd3	0.023461	1	-0.0768505	1	-0.037013	1	-0.092923	1	1	-0.0458314
Ccndbp1	0.00259506	1	-0.0432003	1	0.000222088	1	-0.0101159	1	1	-0.0126248
Ccne1	-0.00312026	1	0.00525375	1	-0.0149229	1	0.0154295	1	1	0.000660036
Ccne2	0.0124613	1	-0.0238146	1	-0.00982931	1	0.00682984	1	1	-0.0035882
Ccnf	-0.0220994	1	0.0416823	1	0.0110022	1	-0.01842	1	1	0.00304129
Ccng1	-0.0434667	1	0.0373637	1	-0.0237228	1	-0.0543625	1	1	-0.0210471
Ccng2	0.0216578	1	-0.0153312	1	-0.0170029	1	-0.0232522	1	1	-0.00848213
Ccnh	0.0420682	1	0.0338875	1	0.0121983	1	-0.0130066	1	1	0.0187869
Ccni	0.000623026	1	0.0624437	1	-0.0305375	1	0.00735008	1	1	0.00996982
Ccnj	-0.00739211	1	-0.00396847	1	-0.0100838	1	0.0105475	1	1	-0.00272422
Ccnk	-0.0335425	1	0.00426964	1	-0.019126	1	0.0272303	1	1	-0.00529213
Ccnl1	0.144972	1	0.0518571	1	0.0112796	1	0.103762	1	1	0.0779675
Ccnl2	0.036796	1	0.034813	1	-0.0729023	1	-0.141804	1	1	-0.0357744
Ccnt1	-0.00285545	1	-0.00839844	1	0.00320983	1	-0.00879389	1	1	-0.00420949
Ccnt2	0.0214973	1	0.0457555	1	-0.0152091	1	-0.0213338	1	1	0.00767748
Ccny	-0.0193408	1	-0.0123514	1	0.0106955	1	0.00418433	1	1	-0.00420311
Ccnyl1	0.0295381	1	7.6453e-05	1	0.0142179	1	-0.0150053	1	1	0.00720677
Ccp110	0.00525562	1	0.00196699	1	0.00434022	1	0.00580939	1	1	0.00434306
Ccpg1	0.00428007	1	-0.0219172	1	-0.00616015	1	0.00775126	1	1	-0.00401151
Ccpg1os	-0.00300481	1	0.0425191	1	-0.00557382	1	-0.00437035	1	1	0.00739254
Ccrl2	0.0219769	1	-0.0322697	1	-0.0203994	1	-0.0386712	1	1	-0.0173408
Ccs	0.0600492	1	0.0277053	1	0.0357514	1	0.0970075	1	1	0.0551283
Ccsap	0.0126914	1	0.0110012	1	0.0193445	1	-0.0311002	1	1	0.00298422
Ccser2	-0.016408	1	0.119804	1	0.0214018	1	-0.0681589	1	1	0.0141599
Cct2	-0.118897	1	0.0412272	1	0.0218899	1	0.05245	1	1	-0.000832359
Cct3	-0.0633749	1	0.0550927	1	0.00930673	1	0.0366213	1	1	0.00941147
Cct4	0.0229473	1	0.0198312	1	-0.0416788	1	-0.0371266	1	1	-0.00900671
Cct5	0.100123	1	0.0301695	1	0.0637078	1	0.0706057	1	1	0.0661515
Cct7	-0.0382524	1	-0.0740432	1	-0.0448521	1	-0.0107128	1	1	-0.0419651
Cct8	0.0409133	1	0.102922	1	0.023854	1	0.0247302	1	1	0.0481048
Ccz1	0.0711692	1	0.119727	1	0.00827178	1	-0.069428	1	1	0.032435
Cd14	0.0752448	1	0.00944639	1	0.00327685	1	-0.0386109	1	1	0.0123393
Cd151	0.0346222	1	0.0298594	1	0.0492	1	-0.0943057	1	1	0.00484398
Cd164	-0.246866	1	-0.00255313	1	0.038898	1	-0.0133387	1	1	-0.0559648
Cd1d1	-0.00389333	1	-0.0719711	1	-0.0709008	0.00185992	-0.0341497	1	0.127355	-0.0452287
Cd24a	-0.078137	1	-0.0907425	1	-0.170239	0.294771	-0.0553206	1	0.964331	-0.0986099
Cd274	-0.0129876	1	0.0337908	1	-0.00916223	1	0.131787	1	1	0.035857
Cd276	0.0163075	1	0.0603776	1	0.00831611	1	-0.0466146	1	1	0.00959664
Cd2ap	-0.0749955	1	-0.0255792	1	-0.0811525	1	0.110429	1	1	-0.0178246
Cd2bp2	-0.0247809	1	0.051776	1	0.00302149	1	0.0821203	1	1	0.0280342
Cd300lf	0.0198845	1	-0.0175183	1	-0.00148292	1	-0.00218677	1	1	-0.00032587
Cd320	0.0233699	1	-0.016891	1	-0.0344643	1	-0.0101285	1	1	-0.00952845
Cd33	-0.00302023	1	0.0198336	1	0.00503288	1	0.015374	1	1	0.00930505
Cd3eap	0.082898	1	-0.0537318	1	-0.0320277	1	-0.0163379	1	1	-0.00479987
Cd40	-0.00348341	1	0.0160667	1	0.00647158	1	-0.017055	1	1	0.00049999
Cd44	-0.14685	1	-0.0561901	1	-0.155021	1	-0.0744401	1	1	-0.108125
Cd47	-0.0725471	1	0.00241153	1	-0.044033	1	-0.0335501	1	1	-0.0369297
Cd52	0.0554508	1	-0.145695	1	0.00500283	1	0.106897	1	1	0.00541397
Cd53	0.0132229	1	0.0376323	1	0.00354393	1	0.00398298	1	1	0.0145955
Cd63	-0.29329	0.000850166	0.0191144	1	-0.0431493	1	0.0348709	1	0.0781846	-0.0706136
Cd68	-0.01166	1	-0.0146868	1	-0.0130939	1	0.0689675	1	1	0.00738171
Cd74	-0.274179	1	-0.116702	1	0.0815772	1	-0.258972	1	1	-0.142069
Cd81	0.0762594	1	0.0294067	1	0.0813993	1	0.138292	1	1	0.0813393
Cd82	-0.20945	1	-0.133356	1	-0.023271	1	-0.0568333	1	1	-0.105727
Cd9	-0.0365263	1	0.00822862	1	0.0691419	1	-0.118522	1	1	-0.0194195
Cd99l2	0.0126626	1	-0.00476688	1	-0.00172492	1	0.0063019	1	1	0.00311817
Cda	-0.158999	0.674521	0.0494744	1	-0.0820692	1	-0.0360407	1	0.999268	-0.0569087
Cdadc1	-0.00079589	1	-0.031516	1	-0.0221632	1	-0.00865677	1	1	-0.015783
Cdan1	0.00363395	1	0.0127234	1	-0.00303717	1	-0.00997293	1	1	0.000836817
Cdc123	0.0598755	1	-0.026922	1	0.00739115	1	0.0599263	1	1	0.0250677
Cdc14a	0.00251888	1	0.01647	1	-0.00198039	1	-0.0196911	1	1	-0.000670663
Cdc14b	0.00693373	1	-0.00860515	1	0.00579672	1	0.0106939	1	1	0.0037048
Cdc16	-0.0382706	1	-0.0274945	1	-0.0404881	1	0.0154507	1	1	-0.0227006
Cdc20	0.0109964	1	0.21722	1	0.0382918	1	-0.136617	1	1	0.0324726
Cdc23	0.0119891	1	-0.0167543	1	0.0227044	1	-0.018357	1	1	-0.000104444
Cdc25a	0.0363546	1	-0.0340931	1	0.000515136	1	-0.00993468	1	1	-0.0017895
Cdc25b	-0.0191321	1	0.0101141	1	0.0166703	1	-0.0298257	1	1	-0.00554335
Cdc25c	-0.0191556	1	0.00643918	1	0.0242668	1	-0.0115008	1	1	1.2382e-05
Cdc26	0.0258364	1	-0.0598401	1	0.0191781	1	0.00585189	1	1	-0.00224342
Cdc27	0.0188994	1	0.0332095	1	-0.0261768	1	0.0181819	1	1	0.0110285
Cdc34	-0.0936122	1	-0.109683	1	-0.0125917	1	-0.125561	1	1	-0.085362
Cdc37	-0.0303517	1	-0.05481	1	0.0400338	1	0.0140448	1	1	-0.00777079
Cdc37l1	0.0480365	1	0.0476944	1	-0.000559829	1	-0.0509474	1	1	0.0110559
Cdc40	-0.0462275	1	0.0885459	1	0.0311856	1	-0.0480551	1	1	0.00636224
Cdc42	0.0450987	1	-0.00397596	1	0.0157301	1	-0.000713103	1	1	0.0140349
Cdc42bpa	-0.0501108	1	0.0277827	1	-0.0660446	1	-0.0836494	1	1	-0.0430055
Cdc42bpb	0.0008927	1	0.0170717	1	-0.0385095	1	0.000903244	1	1	-0.00491044
Cdc42bpg	0.00672714	1	-0.0284603	1	0.0174352	1	-0.0438859	1	1	-0.0120459
Cdc42ep1	0.0102461	1	-0.0144794	1	0.0249884	1	-0.0304338	1	1	-0.00241966
Cdc42ep2	0.0365418	1	0.0110099	1	0.000161722	1	0.0240011	1	1	0.0179286
Cdc42ep3	0.0364394	1	0.0838737	1	-0.0561586	1	0.00471981	1	1	0.0172186
Cdc42ep4	0.0581281	1	0.0191862	1	0.0041738	1	-0.0954225	1	1	-0.00348363
Cdc42ep5	0.0359734	1	0.129788	1	0.0866882	0.0391358	0.0623251	1	0.593468	0.0786936
Cdc42se1	0.0600413	1	-0.00435039	1	-0.0388406	1	-0.0414923	1	1	-0.00616048
Cdc42se2	-0.0308494	1	-0.0178431	1	-0.0340695	1	-0.0344115	1	1	-0.0292934
Cdc45	0.0202279	1	-0.0103618	1	0.0381321	1	0.00903331	1	1	0.0142579
Cdc5l	0.00461411	1	0.00455343	1	-0.0615874	1	-0.00298268	1	1	-0.0138506
Cdc6	0.00431928	1	-0.0212782	1	0.0394555	1	0.0256704	1	1	0.0120417
Cdc7	0.00582704	1	-0.0130738	1	0.00217212	1	-0.0115865	1	1	-0.00416529
Cdc73	0.0149874	1	0.0517336	1	-0.0252754	1	0.00591495	1	1	0.0118401
Cdca2	-0.00646121	1	0.0125995	1	0.0248947	1	-0.0274502	1	1	0.000895684
Cdca3	0.0449621	1	0.0543511	1	0.0263205	1	0.0533763	1	1	0.0447525
Cdca4	0.0986307	1	0.0352744	1	0.0235986	1	0.0481188	1	1	0.0514056
Cdca5	0.0304826	1	0.0112684	1	0.0158699	1	0.0232146	1	1	0.0202089
Cdca7	-0.00844538	1	0.012161	1	0.0120554	1	-0.00593202	1	1	0.00245974
Cdca7l	-0.0165787	1	-0.0474489	1	0.0180553	1	0.0636874	1	1	0.00442878
Cdca8	0.00597234	1	0.133757	1	0.0638402	1	-0.00308712	1	1	0.0501207
Cdcp1	-0.0267387	1	0.0227224	1	-0.0314368	1	-0.0380728	1	1	-0.0183815
Cdh1	-0.208676	0.000490743	-0.0602061	1	-0.0903681	1	0.00288416	1	0.0546582	-0.0890916
Cdh24	0.0191128	1	0.0339531	1	0.00717716	1	-0.00397216	1	1	0.0140677
Cdip1	0.0246658	1	0.0127029	1	0.00607472	1	0.00699342	1	1	0.0126092
Cdipt	0.0122245	1	-0.00511364	1	0.0122576	1	-0.0206141	1	1	-0.000311403
Cdk1	-0.0530955	1	-0.0086857	1	0.0793661	1	-0.116478	1	1	-0.0247233
Cdk10	-0.0289732	1	-0.0876148	1	-0.0199561	1	-0.0577525	1	1	-0.0485741
Cdk11b	-0.0298596	1	0.0541256	1	-0.0118485	1	-0.0471518	1	1	-0.00868359
Cdk12	-0.0316362	1	0.0352541	1	-0.0343778	1	-0.0395673	1	1	-0.0175818
Cdk13	-0.0255036	1	0.0253668	1	0.0474038	1	-0.050509	1	1	-0.000810503
Cdk14	0.0114191	1	0.131013	1	-0.00417166	1	-0.0848615	1	1	0.0133497
Cdk16	0.027171	1	-0.0521143	1	-0.0535918	1	0.0537643	1	1	-0.00619271
Cdk17	-0.0193751	1	0.0672467	1	-0.042723	1	0.028948	1	1	0.00852414
Cdk18	0.0258674	1	-0.00237246	1	0.00796665	1	-0.035594	1	1	-0.0010331
Cdk19	-0.000477502	1	0.0239949	1	-0.012214	1	0.033882	1	1	0.0112963
Cdk2	0.00887265	1	0.0230494	1	0.0173346	1	-0.00474691	1	1	0.0111274
Cdk20	0.00686485	1	0.00883185	1	0.00553732	1	-0.0036083	1	1	0.00440643
Cdk2ap1	0.0411553	1	0.0255084	1	-0.00740326	1	0.0485369	1	1	0.0269493
Cdk2ap2	0.0685172	1	0.152278	1	0.0678555	1	-0.00587781	1	1	0.0706931
Cdk4	-0.00290244	1	-0.117725	1	0.0624709	1	-0.0572329	1	1	-0.0288474
Cdk5	0.0259019	1	-0.0645854	1	-0.0201559	1	-0.0153074	1	1	-0.0185367
Cdk5r1	0.00792732	1	0.0297556	1	-0.0301934	1	-0.00932239	1	1	-0.000458223
Cdk5rap1	0.00194153	1	-0.0112938	1	-0.00498599	1	-0.00761448	1	1	-0.00548817
Cdk5rap2	-0.0283772	1	5.36149e-05	1	-0.0101326	1	-0.0104904	1	1	-0.0122366
Cdk5rap3	-0.0145296	1	-0.0916768	1	-0.0443327	1	0.0727671	1	1	-0.019443
Cdk6	-0.0405117	1	0.0626658	1	-0.0170789	1	-0.0779829	1	1	-0.0182269
Cdk7	0.0381603	1	0.0299224	1	-0.000843163	1	0.000390371	1	1	0.0169075
Cdk8	0.0204962	1	0.0163915	1	-0.00736444	1	-0.0212191	1	1	0.00207605
Cdk9	-0.00190103	1	0.00610805	1	-0.03798	1	-0.121868	1	1	-0.0389103
Cdkal1	0.0098721	1	-0.0171237	1	-0.0247214	1	-0.00625085	1	1	-0.00955596
Cdkl2	-0.0431152	1	0.000381167	1	-0.0275923	1	-0.0321299	1	1	-0.0256141
Cdkl3	0.0199297	1	-0.00914597	1	0.000650477	1	-0.0185768	1	1	-0.00178565
Cdkl5	-0.0149334	1	-0.000744426	1	-0.00654036	1	0.00395239	1	1	-0.00456645
Cdkn1a	-0.155524	1	-0.0095955	1	-0.162433	1	-0.129277	1	1	-0.114208
Cdkn1b	-0.00713615	1	0.0708401	1	0.0200766	1	-0.161653	1	1	-0.019468
Cdkn2aip	-0.0776709	1	0.0286642	1	-0.109782	1	-0.0554777	1	1	-0.0535666
Cdkn2aipnl	0.0865054	1	0.00227538	1	0.077403	1	0.0966978	1	1	0.0657204
Cdkn2c	-0.219474	1	-0.264596	1	-0.159125	1	-0.0710598	1	1	-0.178564
Cdkn2d	0.0212783	1	-0.0565686	1	0.00942816	1	-0.0604003	1	1	-0.0215656
Cdkn3	0.071863	1	0.0748723	1	0.0522868	1	0.0231693	1	1	0.0555478
Cdon	0.0919429	1	0.0011619	1	0.00943277	1	0.0171142	1	1	0.029913
Cdpf1	-0.00570949	1	-0.024134	1	-0.010899	1	-0.00466346	1	1	-0.0113515
Cdr2	-0.0162074	1	0.00128023	1	0.00781688	1	-0.025491	1	1	-0.00815032
Cdr2l	0.0206156	1	0.00557807	1	-0.00706154	1	-0.0129447	1	1	0.00154685
Cds2	0.00840848	1	-0.0464542	1	-0.0196959	1	-0.0778102	1	1	-0.033888
Cdt1	0.00153509	1	-0.0708084	1	0.00191935	1	-0.0293119	1	1	-0.0241665
Cdv3	-0.00756081	1	0.0847247	1	-0.018705	1	-0.0749294	1	1	-0.00411761
Cdyl	0.0202587	1	0.00510053	1	0.013276	1	0.062734	1	1	0.0253423
Cebpb	0.378924	1	-0.0209517	1	0.00643265	1	-0.147014	1	1	0.0543478
Cebpd	-0.0719015	1	0.0230831	1	0.061807	1	0.134998	1	1	0.0369967
Cebpg	0.138344	1	0.0844504	1	0.0499399	1	-0.0252471	1	1	0.0618719
Cebpz	0.0454887	1	0.0762495	1	-0.0254311	1	-0.0176609	1	1	0.0196615
Cebpzos	-0.0386838	1	0.0977612	1	0.00832341	1	0.0206396	1	1	0.0220101
Celf1	0.0854763	1	0.070832	1	-0.0141518	1	-0.0588321	1	1	0.0208311
Celf2	0.09204	1	-0.0230615	1	-0.010016	1	0.0277776	1	1	0.021685
Celf4	0.061399	1	-0.0146939	1	0.00665046	1	-0.0788991	1	1	-0.0063859
Celsr1	0.0081781	1	0.0121703	1	-0.00284228	1	0.0131548	1	1	0.00766521
Cenpa	0.108846	1	0.258955	1	0.191422	1	-0.218723	1	1	0.085125
Cenpb	-0.00404976	1	-0.145333	1	0.0704168	1	-0.0532221	1	1	-0.0330469
Cenpc1	0.0377871	1	0.0229567	1	-0.0175039	1	-0.00415723	1	1	0.00977066
Cenpe	-0.0391919	1	0.138316	1	0.0552881	1	-0.0744708	1	1	0.0199853
Cenpf	0.00520831	1	0.0790836	1	-0.0136441	1	-0.229867	1	1	-0.0398048
Cenph	0.0731721	1	-0.00296655	1	0.0564744	1	0.0662247	1	1	0.0482262
Cenpi	0.0115182	1	-0.000757984	1	0.0209579	1	0.00499626	1	1	0.00917861
Cenpj	0.0113373	1	0.0309847	1	0.0211821	1	-0.0303377	1	1	0.00829158
Cenpk	0.0137478	1	0.023994	1	0.0377098	1	0.0139352	1	1	0.0223467
Cenpl	-0.00926844	1	0.0741807	1	-0.00166087	1	-0.0287309	1	1	0.00863012
Cenpm	0.00389948	1	0.00839004	1	0.0151658	1	-0.0204958	1	1	0.00173988
Cenpn	0.0303182	1	0.000277616	1	0.0027548	1	0.0217238	1	1	0.0137686
Cenpo	0.000427209	1	0.00974122	1	0.00567218	1	-0.00184381	1	1	0.0034992
Cenpp	0.0266306	1	0.0155993	1	0.00813806	1	0.0121764	1	1	0.0156361
Cenpq	0.0411116	1	-0.0370935	1	0.0347981	1	0.00581085	1	1	0.0111568
Cenps	-0.00253871	1	0.0396759	1	0.00319055	1	0.0980813	1	1	0.0346023
Cenpt	-0.0248964	1	0.0401764	1	-0.00417065	1	-0.0475861	1	1	-0.00911919
Cenpu	-0.00981561	1	-0.00262717	1	0.0105352	1	-0.0150847	1	1	-0.00424807
Cenpv	0.0450466	1	0.0048958	1	0.114751	1	-0.048593	1	1	0.0290251
Cenpw	0.0586893	1	0.000792192	1	0.0543241	1	-0.0689547	1	1	0.0112127
Cenpx	-0.0358114	1	-0.00401648	1	-0.00446683	1	0.07546	1	1	0.00779132
Cep104	-0.0126769	1	0.00747092	1	-0.00771066	1	0.0022525	1	1	-0.00266603
Cep112	0.0465072	1	0.0233223	1	0.0267079	1	-0.00479606	1	1	0.0229353
Cep120	0.00897293	1	-0.000108853	1	0.0152315	1	-0.0111199	1	1	0.00324392
Cep126	-0.00616877	1	-0.00232951	1	-0.0010981	1	-0.010528	1	1	-0.0050311
Cep128	-0.000449791	1	-0.00177541	1	-0.0037712	1	-0.0010566	1	1	-0.00176325
Cep131	0.0017981	1	-0.00566109	1	-0.018227	1	-0.0278517	1	1	-0.0124854
Cep135	-0.010442	1	0.0395223	1	0.013375	1	-0.011815	1	1	0.00766007
Cep152	-0.00114688	1	0.00645711	1	-0.00242054	1	-0.0025074	1	1	9.55713e-05
Cep162	0.0235848	1	0.0970768	1	-0.0187307	1	-0.0282658	1	1	0.0184163
Cep164	0.0252743	1	0.0396434	1	0.00392578	1	-0.105683	1	1	-0.00920975
Cep170	-0.0647556	1	0.0126254	1	-0.153914	1	-0.165327	1	1	-0.0928427
Cep170b	0.00943559	1	0.0166551	1	-0.0212353	1	-0.00679522	1	1	-0.000484961
Cep19	-0.00862913	1	0.0409927	1	0.00349612	1	-0.0198477	1	1	0.00400298
Cep192	-0.00979891	1	0.00288484	1	0.0422617	1	-0.0336216	1	1	0.000431502
Cep250	-0.00254164	1	0.0324306	1	-0.0158477	1	-0.0282723	1	1	-0.00355776
Cep290	-0.008825	1	0.0287904	1	0.0399324	1	-0.00766605	1	1	0.0130579
Cep295	0.0115119	1	0.0209167	1	0.0208277	1	-0.109938	1	1	-0.0141703
Cep350	-0.0369531	1	0.0409925	1	-0.0980016	1	0.0554014	1	1	-0.00964021
Cep41	7.87859e-05	1	-0.00471967	1	0.0160641	1	0.0145493	1	1	0.00649315
Cep44	-0.0220278	1	0.000729847	1	-0.0135465	1	-0.026437	1	1	-0.0153203
Cep55	0.0411713	1	-0.00994478	1	0.0394599	1	-0.0822123	1	1	-0.0028815
Cep57	0.028999	1	0.0195206	1	0.0327494	1	0.0142914	1	1	0.0238901
Cep57l1	0.0260095	1	0.00869734	1	0.0189018	1	-0.00163707	1	1	0.0129929
Cep63	-0.00754232	1	0.0151651	1	0.00886376	1	0.0146455	1	1	0.00778301
Cep68	-0.0255134	1	-0.0188725	1	-0.0099568	1	-0.00609625	1	1	-0.0151097
Cep70	-0.00434432	1	0.00468278	1	0.0253854	1	0.162109	1	1	0.0469581
Cep72	0.0157647	1	0.0166089	1	0.00443528	1	0.00443745	1	1	0.0103116
Cep76	-0.00225674	1	0.0168053	1	0.00507677	1	0.0134634	1	1	0.00827218
Cep78	0.00151845	1	-0.0145315	1	0.00321293	1	-0.020368	1	1	-0.00754204
Cep83	-0.0783095	1	0.0311279	1	-0.000721619	1	0.144749	1	1	0.0242116
Cep85	-0.00441449	1	0.00162749	1	-0.0116949	1	-0.0158583	1	1	-0.00758506
Cep85l	-0.00723601	1	-0.00223624	1	-0.0170346	1	-0.0122771	1	1	-0.009696
Cep89	-0.00061968	1	0.019886	1	0.00678402	1	-0.0095503	1	1	0.00412501
Cep95	0.00773052	1	0.0031958	1	0.000410205	1	-0.0165887	1	1	-0.00131306
Cep97	0.0020595	1	0.0045123	1	-0.00381043	1	-0.0100645	1	1	-0.00182579
Cept1	0.00734151	1	-0.0163791	1	0.00282354	1	0.0379305	1	1	0.00792912
Cerk	0.0135472	1	-0.000819946	1	-0.00438078	1	-0.00400479	1	1	0.00108542
Cers2	-0.163139	1	0.0157802	1	0.0124878	1	-0.0230333	1	1	-0.0394761
Cers5	0.0032142	1	-0.00360942	1	0.0347083	1	-0.0233718	1	1	0.00273532
Cers6	-0.00181251	1	-0.0441409	1	0.00639322	1	-0.00074671	1	1	-0.0100767
Cetn2	-0.000817635	1	0.135257	1	-0.0141138	1	-0.0633781	1	1	0.0142368
Cetn3	0.0780163	1	-0.0488457	1	0.0156941	1	-0.0269116	1	1	0.00448828
Cetn4	-0.0106276	1	-0.0111112	1	-0.0022448	1	-0.0133323	1	1	-0.00932897
Cfap20	0.0267702	1	-0.133834	1	-0.0759643	1	-0.128227	1	1	-0.0778138
Cfap36	0.0670525	1	-0.0615561	1	-0.00672335	1	-0.0123476	1	1	-0.00339363
Cfap43	0.0545465	1	0.0536065	1	0.0147641	1	0.0995491	1	1	0.0556166
Cfap97	-0.0021464	1	-0.0587562	1	-0.0511585	1	-0.0391111	1	1	-0.0377931
Cfdp1	0.0127718	1	-0.0845332	1	-0.0348604	1	-0.103649	1	1	-0.0525676
Cfl1	0.234077	9.82447e-05	0.130345	1	0.0785509	1	0.102135	1	0.0180553	0.136277
Cfl2	-0.0466057	1	0.0253625	1	0.0021073	1	-0.0173309	1	1	-0.00911669
Cflar	0.0423968	1	-0.00416539	1	0.00956722	1	0.0308915	1	1	0.0196725
Cggbp1	0.0839483	1	0.0515393	1	0.00124221	1	-0.0224932	1	1	0.0285591
Cgn	0.00760018	1	0.00575835	1	0.012877	1	-0.00416437	1	1	0.00551779
Cgnl1	-0.135332	1	0.0117645	1	0.0227086	1	-0.14329	1	1	-0.0610371
Cgref1	-0.0223386	1	-0.0139144	1	-0.0250553	1	0.0855922	1	1	0.00607096
Cgrrf1	0.0467013	1	0.0969626	1	0.00350792	1	0.0154988	1	1	0.0406676
Chac1	0.0606123	1	0.0418415	1	-0.017526	1	0.0553324	1	1	0.035065
Chac2	-0.0112365	1	0.00977242	1	0.0380502	1	-0.0397992	1	1	-0.000803271
Chaf1a	0.0235297	1	0.0713817	1	0.0425823	1	0.070588	1	1	0.0520204
Chaf1b	0.0716548	1	-0.0806376	1	0.0604693	1	-0.0212925	1	1	0.00754852
Champ1	-0.0215267	1	-0.0544373	1	-0.0275887	1	-0.0184464	1	1	-0.0304998
Chchd1	0.0513163	1	0.0103586	1	0.110766	1	0.0673539	1	1	0.0599488
Chchd10	-0.00447981	1	-0.0366026	1	0.000941375	1	0.0273717	1	1	-0.00319232
Chchd2	0.0585854	1	0.0142575	1	-0.00952974	1	-0.00814454	1	1	0.0137922
Chchd3	0.0497267	1	0.00365876	1	0.0159788	1	0.0867742	1	1	0.0390346
Chchd4	-0.00436266	1	0.0142653	1	0.0458415	1	0.0486453	1	1	0.0260974
Chchd5	0.0406742	1	-0.0255662	1	0.0250992	1	-0.0323222	1	1	0.00197123
Chchd6	0.00550731	1	-0.0497378	1	-0.00910411	1	0.039917	1	1	-0.00335441
Chchd7	0.0615125	1	-0.0945348	1	-0.00359092	1	0.0255788	1	1	-0.00275861
Chd1	0.0733423	1	0.00509095	1	-0.00627208	1	-0.100143	1	1	-0.00699536
Chd1l	-0.0085991	1	-0.00953327	1	-0.0285525	1	-0.00121557	1	1	-0.0119751
Chd2	0.0844021	1	0.119572	1	-0.06846	1	-0.0336427	1	1	0.0254678
Chd3	0.0552591	1	0.0343343	1	0.00026129	1	-0.0124944	1	1	0.0193401
Chd4	0.0973711	1	0.0180291	1	-0.0633559	1	-0.114791	1	1	-0.0156867
Chd6	0.0345189	1	0.0408314	1	0.0117836	1	-0.0174849	1	1	0.0174122
Chd7	0.0601522	1	0.0241104	1	-0.0253647	1	0.0109184	1	1	0.0174541
Chd8	0.0536251	1	0.0423542	1	-0.0409947	1	-0.0762365	1	1	-0.00531298
Chd9	-0.0348724	1	0.0570329	1	-0.0621643	1	-0.0796081	1	1	-0.029903
Chek1	-0.012146	1	0.040027	1	0.0809272	1	0.0191153	1	1	0.0319808
Chek2	0.00396834	1	0.00116098	1	0.0108964	1	0.0171891	1	1	0.0083037
Cherp	-0.0272981	1	-0.00907753	1	-0.0482586	1	-0.0276918	1	1	-0.0280815
Chfr	-0.00707071	1	-0.0300077	1	-0.0186796	1	-0.0230147	1	1	-0.0196932
Chic2	0.0733433	1	-0.00243664	1	-0.0231717	1	-0.077896	1	1	-0.00754028
Chid1	-0.00588694	1	0.0147238	1	-0.00937617	1	-0.0835807	1	1	-0.02103
Chka	-0.00690079	1	0.17701	1	-0.0054982	1	-0.0652934	1	1	0.0248293
Chkb	-0.046697	1	0.0946885	1	-0.0180928	1	-0.0274824	1	1	0.000604071
Chm	0.00822173	1	0.070624	1	0.0187706	1	-0.0333962	1	1	0.016055
Chml	0.00132578	1	-0.00345775	1	-0.0145571	1	-0.0182217	1	1	-0.00872768
Chmp1a	-0.0177584	1	-0.0310607	1	0.0135441	1	-0.066768	1	1	-0.0255108
Chmp1b	-0.0165725	1	-0.0781839	1	0.00377024	1	0.014571	1	1	-0.0191038
Chmp2a	0.103945	1	-0.0376417	1	0.0544441	1	-0.0483432	1	1	0.018101
Chmp2b	-0.018245	1	0.0184902	1	0.0167387	1	-0.0285742	1	1	-0.00289756
Chmp3	0.0254702	1	0.0351838	1	0.027691	1	-0.132456	1	1	-0.0110276
Chmp4b	0.0479957	1	-0.123783	1	0.0476656	1	-0.0805035	1	1	-0.0271562
Chmp4c	-0.0210799	1	0.00130225	1	-0.0104531	1	-0.00386044	1	1	-0.00852279
Chmp5	0.0380505	1	-0.00841965	1	-0.00410883	1	-0.00385781	1	1	0.00541605
Chmp6	-0.0431593	1	0.0281808	1	0.0767996	1	-0.0809852	1	1	-0.00479103
Chmp7	0.0216897	1	-0.0167218	1	-0.00109547	1	0.0476917	1	1	0.012891
Chn1	0.0309277	1	0.0096339	1	0.00756921	1	0.00327794	1	1	0.0128522
Chordc1	0.00288477	1	0.0455808	1	-0.0411572	1	-0.0657786	1	1	-0.0146176
Chp1	0.00781401	1	-0.0218063	1	-0.000536203	1	-0.0497238	1	1	-0.0160631
Chpf	0.0526978	1	0.147357	1	0.011995	1	-0.0491432	1	1	0.0407267
Chpf2	-0.0120338	1	0.0308914	1	-0.0149994	1	-0.0106793	1	1	-0.00170527
Chpt1	-0.107176	1	-0.0695108	1	-0.062955	1	-0.091884	1	1	-0.0828815
Chrac1	-0.0193963	1	-0.0186898	1	0.0232426	1	-0.037252	1	1	-0.0130239
Chrna1os	0.00739646	1	-0.00864113	1	0.00328844	1	-0.0133103	1	1	-0.00281662
Chrnb1	0.0757173	1	0.0255121	1	0.0357339	1	-0.0648633	1	1	0.018025
Chst11	-0.0637453	1	-0.0154906	1	-0.0251239	1	-0.0331266	1	1	-0.0343716
Chst12	0.0504831	1	-0.025116	1	0.0049589	1	-0.0109818	1	1	0.00483605
Chst14	0.0260416	1	0.015082	1	0.00357643	1	0.00783895	1	1	0.0131348
Chst2	-0.0621927	1	-0.0856227	1	-0.0216551	1	-0.0480133	1	1	-0.0543709
Chsy1	-0.0446567	1	-0.0133163	1	-0.0368167	1	-0.0364235	1	1	-0.0328033
Chtf18	0.000675149	1	-0.0178387	1	0.0050662	1	0.00219844	1	1	-0.00247473
Chtf8	0.0191556	1	-0.0235887	1	-0.0177471	1	-0.133055	1	1	-0.0388088
Chtop	0.0406551	1	0.0360892	1	0.0376246	1	-0.025902	1	1	0.0221167
Chuk	0.0128409	1	8.00911e-05	1	-0.0345247	1	-0.0200943	1	1	-0.0104245
Churc1	0.0736401	1	0.0272838	1	0.0251747	1	-0.00355615	1	1	0.0306356
Ciao1	0.0298943	1	0.0185307	1	-0.00282676	1	-0.0740295	1	1	-0.00710782
Ciapin1	-0.0438333	1	-0.131909	1	-0.0302388	1	-0.0171003	1	1	-0.0557703
Ciart	-0.00760668	1	0.0133349	1	-0.0344178	1	0.000486921	1	1	-0.00705068
Cib1	-0.0200366	1	0.087093	1	0.0024198	1	0.0807074	1	1	0.0375459
Cib2	0.00517213	1	0.0303031	1	0.0414383	1	0.110187	1	1	0.046775
Cic	0.0272223	1	-0.0461361	1	-0.0330452	1	-0.0552592	1	1	-0.0268046
Ciita	-0.000276911	1	0.0332181	1	-0.00454424	1	-0.0115442	1	1	0.00421319
Cinp	0.0160742	1	-0.0377112	1	0.00620068	1	0.0851682	1	1	0.017433
Cipc	0.00445632	1	-0.0283091	1	-0.0115785	1	0.000485454	1	1	-0.00873645
Cir1	-0.0405214	1	-0.0441206	1	0.0130985	1	-0.0438123	1	1	-0.028839
Cirbp	-0.0729581	1	0.0469192	1	-0.0446741	1	0.0358282	1	1	-0.00872119
Cisd1	-0.0423951	1	0.0123567	1	0.0315665	1	0.0197341	1	1	0.00531554
Cisd2	-0.0456314	1	0.0255739	1	-0.0107462	1	-0.0103698	1	1	-0.0102934
Cisd3	0.0161016	1	0.0703203	1	0.03756	1	0.124419	1	1	0.0621003
Cish	0.0343846	1	-0.0646787	1	-0.0771428	1	-0.100487	1	1	-0.0519809
Cit	0.0148954	1	0.00350968	1	0.0236507	1	-0.0265636	1	1	0.00387304
Cited2	-0.271356	1	0.0146873	1	-0.0472688	1	0.0920469	1	1	-0.0529726
Ciz1	-0.00839164	1	-0.0507173	1	-0.012144	1	-0.000391918	1	1	-0.0179112
Ckap2	-0.0217003	1	-0.00975448	1	-0.0134813	1	-0.105234	1	1	-0.0375425
Ckap2l	0.0466384	1	0.0179054	1	0.106214	1	-0.0681842	1	1	0.0256435
Ckap4	0.0710262	1	0.0982609	1	0.158582	9.84664e-06	0.0987189	1	0.00329213	0.106647
Ckap5	0.0035568	1	0.0377547	1	0.0249198	1	-0.125811	1	1	-0.0148949
Ckb	0.0453635	1	-0.0485491	1	0.0274321	1	0.0590687	1	1	0.0208288
Cklf	0.00842483	1	-0.0533571	1	-0.0183507	1	-0.0186696	1	1	-0.0204881
Cks1b	0.0229224	1	0.186912	1	0.22982	0.0422586	0.218507	1	0.610554	0.16454
Cks1brt	0.00543973	1	0.00973811	1	0.0219748	1	-0.00350829	1	1	0.00841108
Cks2	0.0535823	1	0.0219387	1	0.0942493	1	-0.0973052	1	1	0.0181163
Clasp1	-0.0195028	1	0.0517482	1	0.00145502	1	-0.00797429	1	1	0.00643153
Clasp2	-0.0218152	1	0.0168607	1	-0.0189758	1	-0.000469836	1	1	-0.00610003
Clasrp	-0.0131224	1	0.0249572	1	0.0128671	1	0.0193362	1	1	0.0110095
Clca3a1	0.032693	1	-0.0618824	1	-0.0108546	1	0.0478867	1	1	0.00196064
Clcc1	0.0514275	1	-0.0517492	1	0.0243279	1	-0.0126541	1	1	0.002838
Clcf1	0.113086	1	-0.023491	1	-0.0219942	1	-0.0563647	1	1	0.00280909
Clcn2	0.00552611	1	0.0017641	1	-0.0113968	1	-0.00422568	1	1	-0.00208308
Clcn3	-0.151723	1	-0.0277151	1	-0.173055	1	-0.0683134	1	1	-0.105202
Clcn4	0.0402983	1	-0.0106125	1	-0.00394375	1	-0.00860872	1	1	0.00428333
Clcn5	-0.00322024	1	-0.0135532	1	-0.000937094	1	0.0947308	1	1	0.0192551
Clcn6	-0.00926837	1	0.0181569	1	-0.00814034	1	0.00434219	1	1	0.00127258
Clcn7	0.00631588	1	0.0140569	1	-0.00399596	1	-0.0115134	1	1	0.00121586
Cldn12	-0.00286543	1	0.00650305	1	-0.00884539	1	-0.00490052	1	1	-0.00252707
Cldn23	-0.00510928	1	-0.0061991	1	-0.0205659	1	-0.0232973	1	1	-0.0137929
Cldn3	-0.13297	1	0.103641	1	0.252554	7.43092e-05	0.0251203	1	0.014782	0.0620865
Cldn4	-0.226026	1	-0.242456	1	-0.156783	1	-0.583063	1	1	-0.302082
Cldn7	-0.0524302	1	-0.119209	1	-0.116218	1	-0.392785	1	1	-0.170161
Cldnd1	0.050384	1	0.00380887	1	0.0209838	1	-0.0327984	1	1	0.0105946
Clec11a	0.00413029	1	-0.0130554	1	0.00707938	1	-0.0371861	1	1	-0.00975798
Clec16a	-0.0110337	1	-0.00461861	1	0.00642364	1	0.0105027	1	1	0.000318508
Clec2d	-0.0556342	1	0.0326296	1	-0.0281384	1	-0.0165988	1	1	-0.0169355
Clec4d	0.040375	1	-0.0945084	1	-0.0014679	1	-0.0153094	1	1	-0.0177277
Clec4e	0.00991492	1	-0.0194569	1	-0.0159794	1	-0.0201015	1	1	-0.0114057
Clic1	-0.196201	1	-0.0526645	1	-0.0681123	1	-0.0242124	1	1	-0.0852975
Clic4	0.0352256	1	0.115956	1	0.0805057	1	0.0879471	1	1	0.0799085
Clint1	0.0252018	1	-0.0187608	1	-0.0212642	1	-0.0848392	1	1	-0.0249156
Clip1	0.0255782	1	0.128105	1	-0.0352123	1	-0.0353906	1	1	0.02077
Clip2	0.00827103	1	0.0395584	1	0.0028895	1	0.00184333	1	1	0.0131406
Clip4	-0.113562	1	0.0213262	1	-0.13322	1	0.00730873	1	1	-0.0545367
Clk1	0.094467	1	0.0502109	1	0.0200604	1	-0.0245303	1	1	0.035052
Clk2	-0.0199438	1	-0.033844	1	-0.034839	1	-0.0367298	1	1	-0.0313392
Clk3	0.0135826	1	-0.0107352	1	-0.0239896	1	0.0475873	1	1	0.00661126
Clk4	0.0932901	1	0.0415081	1	-0.0312529	1	-0.0361409	1	1	0.0168511
Cln3	0.0220011	1	-0.0631345	1	-0.00602204	1	0.041649	1	1	-0.00137662
Cln5	-0.00681264	1	-0.000772719	1	0.0002646	1	0.0137202	1	1	0.00159986
Cln6	-0.0129618	1	-0.038479	1	-0.0151689	1	-0.0463864	1	1	-0.0282491
Cln8	-0.00402431	1	-0.0613713	1	-0.00199336	1	0.0584691	1	1	-0.00222999
Clns1a	0.0261395	1	0.113787	1	0.036469	1	-0.012752	1	1	0.0409109
Clock	0.0604519	1	-0.00670421	1	-0.0531076	1	0.0845686	1	1	0.0213022
Clp1	0.00855891	1	0.018589	1	0.0144186	1	-0.00948455	1	1	0.0080205
Clpb	-0.00694259	1	-0.000758833	1	-0.0110007	1	-0.0690883	1	1	-0.0219476
Clpp	-0.00619034	1	0.00557009	1	0.0165923	1	0.00667446	1	1	0.00566163
Clptm1	0.0318579	1	-0.0183821	1	-0.000377417	1	-0.0333369	1	1	-0.00505962
Clptm1l	-0.00898012	1	-0.0498075	1	-0.037728	1	-0.000358845	1	1	-0.0242186
Clpx	-0.0293911	1	-0.0522987	1	-0.00528213	1	-0.0131176	1	1	-0.0250224
Clspn	0.0249985	1	-0.00298261	1	0.0101982	1	0.0202796	1	1	0.0131234
Clstn1	-0.025164	1	-0.0137674	1	-0.0442814	1	-0.0264404	1	1	-0.0274133
Clta	-0.0118279	1	-0.0498857	1	0.056525	1	0.0217192	1	1	0.00413265
Cltb	-0.00375472	1	-0.023503	1	0.0172467	1	0.0900382	1	1	0.0200068
Cltc	0.0468754	1	0.0544726	1	-0.0426215	1	0.0515689	1	1	0.0275739
Clu	-0.305948	1	-0.199866	1	-0.292623	1	-0.0454054	1	1	-0.21096
Cluap1	0.0330844	1	-0.0165631	1	0.0195177	1	-0.0433367	1	1	-0.00182443
Cluh	-0.0173842	1	0.00152008	1	-0.0147574	1	-0.013232	1	1	-0.0109634
Clybl	0.00793717	1	-0.0118512	1	-0.0135992	1	-0.0105488	1	1	-0.00701552
Cmas	0.0453988	1	0.00941521	1	-0.0327304	1	-0.029639	1	1	-0.00188882
Cmc1	0.0825191	1	-0.115584	1	-0.0333992	1	-0.0629428	1	1	-0.0323516
Cmc2	-0.135208	1	-0.0840227	1	0.000804439	1	-0.0416342	1	1	-0.0650151
Cmc4	0.00836352	1	-0.0107401	1	-0.00411484	1	0.0149041	1	1	0.00210317
Cmip	0.0469123	1	0.0155146	1	-0.0469041	1	-0.0154161	1	1	2.66722e-05
Cmpk1	0.0210483	1	-0.0491518	1	0.0222745	1	0.00391555	1	1	-0.000478385
Cmss1	0.00569477	1	0.0226008	1	0.02715	1	-0.024907	1	1	0.00763465
Cmtm3	0.0954103	1	-0.0227787	1	-0.0120708	1	0.0996174	1	1	0.0400445
Cmtm4	-0.0322237	1	-0.0124326	1	-0.0256374	1	0.167816	1	1	0.0243806
Cmtm6	-0.0312313	1	0.0120778	1	-0.00392359	1	-0.0432031	1	1	-0.01657
Cmtm7	-0.00146875	1	0.00150864	1	0.0169865	1	-0.0365299	1	1	-0.00487587
Cmtr1	0.00268634	1	0.0290534	1	-0.0136312	1	-0.00325008	1	1	0.00371459
Cmtr2	-0.00141824	1	-0.0209772	1	-0.00545977	1	-0.0176074	1	1	-0.0113656
Cnbp	0.0558535	1	-0.0507687	1	0.0235794	1	0.0341109	1	1	0.0156938
Cndp2	-0.0102545	1	-0.0167934	1	0.0100031	1	-0.0218251	1	1	-0.00971745
Cnep1r1	-0.00687846	1	-0.0363663	1	-0.0355507	1	0.103365	1	1	0.00614247
Cnih1	0.0103458	1	0.0107451	1	0.0675738	1	-0.00668355	1	1	0.0204953
Cnih4	-0.0444642	1	-0.111207	1	-0.049122	1	-0.196274	1	1	-0.100267
Cnksr1	-0.0222221	1	-0.00584983	1	-0.0198932	1	-0.00367601	1	1	-0.0129103
Cnksr3	-0.00125508	1	0.0194508	1	-0.00916983	1	-0.00530173	1	1	0.000931036
Cnn2	-0.0241365	1	0.0399944	1	0.0337511	1	-0.109271	1	1	-0.0149155
Cnn3	0.0635322	1	0.0408756	1	-0.000317769	1	0.0676962	1	1	0.0429466
Cnnm2	-0.00817025	1	-0.00108621	1	0.0332382	1	-0.00936055	1	1	0.00365529
Cnnm3	-0.00967866	1	-0.0115601	1	-0.0121463	1	-0.0208997	1	1	-0.0135712
Cnnm4	-0.0145557	1	-0.00740458	1	-0.00924038	1	-0.0139305	1	1	-0.0112828
Cnot1	0.0250314	1	-0.00657472	1	-0.0850013	1	-0.00327069	1	1	-0.0174538
Cnot10	-0.0141749	1	-0.0106502	1	-0.0217764	1	0.0506035	1	1	0.00100052
Cnot11	0.0210074	1	0.0842425	1	0.016223	1	-0.00178675	1	1	0.0299215
Cnot2	-0.0362049	1	-0.00392226	1	-0.00161831	1	-0.0637343	1	1	-0.0263699
Cnot3	0.0213828	1	0.00658692	1	0.014337	1	-0.0668006	1	1	-0.00612346
Cnot4	0.00257759	1	0.0409789	1	-0.034105	1	-0.0186106	1	1	-0.00228977
Cnot6	0.0407248	1	0.0938159	1	-0.0280696	1	0.0428486	1	1	0.0373299
Cnot6l	-0.00783089	1	-0.0167957	1	0.0174615	1	-0.033039	1	1	-0.010051
Cnot7	-0.0518869	1	-0.0186044	1	-0.0917562	1	-0.0838372	1	1	-0.0615212
Cnot8	0.0249524	1	-0.0301378	1	0.0217231	1	0.0462964	1	1	0.0157085
Cnot9	0.0273069	1	-0.00305431	1	0.0152204	1	-0.0127827	1	1	0.00667257
Cnp	0.011952	1	0.0143356	1	-0.0449583	1	-0.0816793	1	1	-0.0250875
Cnppd1	-0.00751389	1	0.0553344	1	0.00240374	1	-0.0180093	1	1	0.00805373
Cnpy2	-0.0558417	1	0.0564087	1	0.0203705	1	0.0221879	1	1	0.0107814
Cnpy3	0.0387491	1	0.00163096	1	-0.0101832	1	-0.0395703	1	1	-0.00234334
Cnpy4	0.0463164	1	0.0588768	1	0.0032117	1	0.0243648	1	1	0.0331924
Cnst	-0.0293234	1	-0.00656135	1	-0.0185461	1	-0.00628342	1	1	-0.0151786
Cntrl	-0.0133546	1	-0.058431	1	-0.0340201	1	-0.028623	1	1	-0.0336072
Cntrob	0.000713146	1	0.00933676	1	-0.0117143	1	0.00610857	1	1	0.00111105
Coa3	-0.0315998	1	0.0437039	1	0.0446809	1	-0.0736527	1	1	-0.00421691
Coa4	-0.0135006	1	0.0672859	1	-0.00107814	1	0.00832961	1	1	0.0152592
Coa5	-0.031402	1	0.0130207	1	0.00110077	1	0.00710415	1	1	-0.0025441
Coa6	-0.0194845	1	-0.0621319	1	-0.0150826	1	-0.0355942	1	1	-0.0330733
Coa7	-0.0122534	1	0.0798488	1	-0.0104454	1	-0.00643422	1	1	0.0126789
Coasy	0.018014	1	-0.100216	1	-0.034651	1	-0.096872	1	1	-0.0534312
Cobll1	0.0237341	1	0.00768969	1	0.0070865	1	-0.00102332	1	1	0.00937174
Cog1	0.0084928	1	0.00410374	1	-0.0156455	1	-0.010179	1	1	-0.00330698
Cog2	-0.0166377	1	-0.0152334	1	-0.0260792	1	-0.0443741	1	1	-0.0255811
Cog3	0.00403881	1	0.0314771	1	0.0106347	1	0.0179515	1	1	0.0160255
Cog4	-0.0098036	1	-0.0102483	1	-0.0333519	1	-0.0113855	1	1	-0.0161973
Cog5	-0.0103537	1	0.000890256	1	-0.00628329	1	-0.0261456	1	1	-0.0104731
Cog6	-0.0211661	1	0.0127601	1	-0.0122157	1	-0.0270593	1	1	-0.0119202
Cog7	0.00832997	1	0.109657	1	0.00468225	1	-0.0402008	1	1	0.0206172
Cog8	-0.0364214	1	-0.14125	1	-0.0323068	1	-0.00553767	1	1	-0.053879
Coil	-0.00741614	1	0.0134625	1	-0.00427277	1	-0.0177812	1	1	-0.00400191
Col12a1	0.0450821	1	0.0125962	1	-0.0206109	1	0.0852385	1	1	0.0305765
Col16a1	-0.00441767	1	0.0188203	1	0.038947	1	0.0249012	1	1	0.0195627
Col18a1	0.0908537	1	0.151165	1	0.0402256	1	0.0904198	1	1	0.093166
Col1a1	0.0171892	1	-0.21075	1	-0.0138115	1	-0.00607478	1	1	-0.0533619
Col1a2	-0.00300478	1	0.00470609	1	-0.00788986	1	0.172479	1	1	0.0415727
Col3a1	0.0227657	1	0.0177252	1	-0.00540096	1	-0.00428523	1	1	0.00770118
Col4a1	0.0491567	1	0.0396136	1	-0.0971993	1	-0.0326439	1	1	-0.0102682
Col4a2	-0.00821712	1	-0.0419068	1	-0.0212686	1	-0.00676944	1	1	-0.0195405
Col4a3bp	-0.0416308	1	0.048995	1	0.0165509	1	-0.0810804	1	1	-0.0142913
Col4a5	0.0376477	1	0.031451	1	-0.00156226	1	-0.00818419	1	1	0.0148381
Col5a1	-0.0197179	1	0.026603	1	-0.0449709	1	0.041287	1	1	0.00080031
Col5a2	-0.0433197	1	-0.00207006	1	0.00739487	1	-0.0017109	1	1	-0.00992644
Col6a1	-0.0869283	1	0.0816411	1	-0.0720188	1	-0.02291	1	1	-0.025054
Col6a2	-0.0431375	1	-0.0248158	1	-0.0421615	1	0.0117058	1	1	-0.0246023
Col7a1	-0.110118	1	0.132446	1	0.0157042	1	0.114215	1	1	0.0380621
Col8a1	-0.0657928	1	0.0475523	1	0.102888	1	-0.0583745	1	1	0.00656827
Colgalt1	-0.0379578	1	-0.0502782	1	-0.0547837	1	-0.00737481	1	1	-0.0375986
Commd1	-0.0356182	1	-0.0405656	1	0.0044426	1	-0.102261	1	1	-0.0435006
Commd10	0.0275599	1	0.0188718	1	-0.0142837	1	-0.0296454	1	1	0.000625641
Commd2	-0.0424712	1	-0.00174048	1	0.000261835	1	-0.0954104	1	1	-0.0348401
Commd3	0.05172	1	-0.0713187	1	0.00891948	1	0.0540878	1	1	0.0108521
Commd4	0.0183235	1	-0.0185987	1	-0.00529775	1	-0.0457039	1	1	-0.0128192
Commd6	-0.00612512	1	0.0430465	1	-0.00991015	1	-0.0245356	1	1	0.000618912
Commd7	0.0246706	1	0.118397	1	-0.099782	1	0.0216814	1	1	0.0162418
Commd8	-0.0374444	1	0.0307838	1	-0.0449464	1	-0.0799704	1	1	-0.0328943
Commd9	0.0121991	1	-0.0306748	1	0.0170486	1	0.0229564	1	1	0.00538232
Comt	0.13528	1	0.00765012	1	0.00994316	1	-0.128202	1	1	0.00616771
Comtd1	0.0276664	1	-0.0850336	1	0.0416392	1	-0.00469676	1	1	-0.0051062
Cop1	-0.0993123	1	-0.0178314	1	-0.0746012	1	-0.10161	1	1	-0.0733386
Copa	0.0640214	1	-0.020237	1	-0.0957444	1	-0.0818037	1	1	-0.0334409
Copb1	0.0433123	1	0.0981572	1	-0.00377808	1	-0.00272544	1	1	0.0337415
Copb2	0.0277688	1	0.0691739	1	0.0122067	1	-0.0706972	1	1	0.00961305
Cope	-0.138821	1	-0.105061	1	-0.103517	1	-0.103894	1	1	-0.112823
Copg1	0.0140339	1	-0.0163752	1	-0.0436609	1	-0.0221278	1	1	-0.0170325
Copg2	0.0516822	1	0.00122292	1	-0.0316209	1	0.00158159	1	1	0.00571647
Coprs	0.000675353	1	-0.0389354	1	-0.0073576	1	-0.0221625	1	1	-0.016945
Cops2	-0.0321128	1	-0.075576	1	-0.0298372	1	-0.0924532	1	1	-0.0574948
Cops3	0.0443925	1	0.0816655	1	0.0283186	1	0.0282151	1	1	0.0456479
Cops4	0.0386632	1	-0.0493296	1	0.00172365	1	0.0117636	1	1	0.000705197
Cops5	0.0884542	1	0.119691	1	-0.0138038	1	-0.0119895	1	1	0.0455879
Cops6	0.0494681	1	0.0439462	1	0.000899041	1	-0.128681	1	1	-0.008592
Cops7a	0.0082776	1	-0.0634404	1	-0.00804289	1	-0.0517342	1	1	-0.028735
Cops7b	0.00795001	1	-0.0162884	1	-0.0211853	1	-0.0323893	1	1	-0.0154782
Cops8	0.029658	1	0.0668837	1	0.0385261	1	-0.0668622	1	1	0.0170514
Cops9	0.144593	1	0.0842343	1	0.0128218	1	0.1133	1	1	0.0887372
Copz1	-0.0205491	1	-0.00515789	1	-0.0109137	1	-0.0335144	1	1	-0.0175338
Copz2	0.0115419	1	-0.00384439	1	-0.00681056	1	0.00437062	1	1	0.0013144
Coq10a	0.000207907	1	-0.0056989	1	-0.00686852	1	0.0410042	1	1	0.00716116
Coq10b	0.0916505	1	0.0238706	1	0.00246719	1	-0.0454498	1	1	0.0181346
Coq2	0.0553898	1	0.0297721	1	-0.0129293	1	-0.0555236	1	1	0.00417725
Coq3	0.00302035	1	-0.0339459	1	0.0020202	1	-0.0251944	1	1	-0.0135249
Coq4	-0.00608379	1	-0.0234535	1	0.00577428	1	0.0490283	1	1	0.00631632
Coq5	-0.0219866	1	0.0208462	1	-0.00609364	1	-0.0105531	1	1	-0.00444679
Coq6	-0.0023621	1	0.0156745	1	-0.0118457	1	0.00183095	1	1	0.000824401
Coq7	0.0240159	1	-0.0298741	1	0.00132745	1	-0.066676	1	1	-0.0178017
Coq8b	-0.0189409	1	0.02457	1	-0.00450537	1	0.00571869	1	1	0.0017106
Coq9	-0.0371449	1	-0.00853551	1	-0.017501	1	0.0325856	1	1	-0.00764893
Coro1a	0.0224767	1	-0.0296969	1	0.00177783	1	-0.0689071	1	1	-0.0185874
Coro1b	0.0614578	1	-0.051429	1	0.0427515	1	0.00434959	1	1	0.0142825
Coro1c	-0.0299419	1	0.088167	1	0.0326513	1	-0.0131144	1	1	0.0194405
Coro2a	0.019712	1	0.000173932	1	0.0160421	1	-0.00178225	1	1	0.00853645
Coro6	-0.0133529	1	0.00126195	1	-0.029317	1	-0.0199876	1	1	-0.0153489
Coro7	0.00797661	1	0.00140274	1	-0.00237324	1	0.00224303	1	1	0.00231228
Cotl1	-0.210991	1	-0.114846	1	-0.0996457	1	-0.00916784	1	1	-0.108663
Cox10	0.0159482	1	0.00785783	1	-0.00855314	1	-0.00331722	1	1	0.00298392
Cox11	0.00513363	1	-0.0284117	1	0.00902272	1	-0.00922859	1	1	-0.00587098
Cox14	0.0305312	1	0.0639745	1	0.0635379	1	0.0501138	1	1	0.0520393
Cox15	0.00814105	1	-0.017796	1	-0.00326646	1	-0.0170653	1	1	-0.00749666
Cox16	0.0273873	1	0.0282245	1	-0.022933	1	0.0187101	1	1	0.0128472
Cox17	0.113878	1	0.0640655	1	0.0639286	1	-0.028629	1	1	0.0533108
Cox18	0.0322584	1	0.086063	1	0.0304183	1	-0.0772869	1	1	0.0178632
Cox19	-0.00922352	1	-0.0523409	1	-0.00158027	1	0.0114569	1	1	-0.0129219
Cox20	-0.00832087	1	-0.0904027	1	-0.0548161	1	-0.0863356	1	1	-0.0599688
Cox4i1	-0.0933469	1	-0.154808	1	-0.0724332	1	-0.0790875	1	1	-0.099919
Cox5a	-0.0963526	1	-0.0155575	1	0.00416106	1	-0.0810667	1	1	-0.0472039
Cox5b	0.262744	1.82232e-07	0.0277407	1	0.0626951	1	-0.0386828	1	0.000138447	0.0786243
Cox6a1	0.138652	1	-0.0184901	1	0.012084	1	-0.0673417	1	1	0.0162259
Cox6b1	0.0428756	1	-0.0492999	1	0.0849259	1	0.0622359	1	1	0.0351844
Cox6c	0.238486	0.0147353	0.0832635	1	0.087503	1	0.141446	1	0.39217	0.137675
Cox7a2	-0.0324455	1	-0.0363764	1	0.0625488	1	0.0466306	1	1	0.0100894
Cox7a2l	-0.0800729	1	-0.0314569	1	-0.0167497	1	0.01792	1	1	-0.0275899
Cox7b	0.062166	1	0.0169448	1	-0.0411211	1	-0.0661535	1	1	-0.00704097
Cox7c	0.132549	1	0.0236597	1	0.086126	1	-0.035284	1	1	0.0517626
Cox8a	0.279254	5.27758e-09	0.0281167	1	0.118851	0.0608665	0.107965	1	6.43257e-07	0.133547
Cp	0.358525	1	0.148642	1	-0.039024	1	0.0257172	1	1	0.123465
Cpd	0.0183158	1	0.016324	1	0.00373985	1	-0.00414051	1	1	0.0085598
Cpe	-0.0662109	1	-0.00599588	1	-0.0543197	1	-0.12354	1	1	-0.0625168
Cpeb2	0.0187058	1	-0.0225176	1	-0.015215	1	-0.0281408	1	1	-0.0117919
Cpeb4	0.0439357	1	0.0157233	1	-0.042521	1	0.00440242	1	1	0.00538508
Cpne2	-0.0344134	1	-0.0108677	1	-0.00411486	1	-0.0253226	1	1	-0.0186796
Cpne3	0.000530764	1	-0.00421646	1	0.00686613	1	-0.0552807	1	1	-0.0130251
Cpne8	-0.0640657	1	0.0303036	1	0.0169165	1	0.0564842	1	1	0.00990966
Cpox	-0.045414	1	-0.00378824	1	-0.00681331	1	-0.0344378	1	1	-0.0226133
Cpped1	0.0139951	1	0.0161601	1	-0.00508164	1	-0.0222683	1	1	0.000701325
Cpq	-0.0727381	1	-0.00906891	1	-0.0622979	0.00835036	-0.0262688	1	0.296443	-0.0425934
Cpsf1	0.00133651	1	0.00372687	1	0.0515006	1	-0.00474281	1	1	0.0129553
Cpsf2	-0.0338459	1	-0.00278802	1	0.0187464	1	0.0358656	1	1	0.00449451
Cpsf3	0.00657442	1	-0.0515452	1	-0.0107367	1	-0.0220154	1	1	-0.0194307
Cpsf4	0.029356	1	-0.00903456	1	0.00119909	1	-0.00119562	1	1	0.00508122
Cpsf6	0.0397302	1	0.0169305	1	0.00790608	1	0.0891697	1	1	0.0384341
Cpsf7	0.0194172	1	-0.00104802	1	0.00557362	1	0.0058051	1	1	0.00743698
Cpt1a	0.0058456	1	-0.0271961	1	0.0133748	1	-0.0264986	1	1	-0.00861858
Cpt1c	-0.00115569	1	-0.00134064	1	-0.00121129	1	0.0233262	1	1	0.00490465
Cpt2	0.0262995	1	-0.0164258	1	0.00699184	1	0.00884108	1	1	0.00642665
Cptp	-0.0178777	1	-0.0223867	1	-0.0108865	1	-0.0491804	1	1	-0.0250828
Cr1l	-0.0290735	1	-0.0308646	1	0.00438135	1	0.0805268	1	1	0.00624252
Cracr2b	0.048269	1	0.021139	1	0.022828	1	0.0538194	1	1	0.0365139
Cradd	-0.0183849	1	-0.022997	1	-0.0143024	1	0.00868917	1	1	-0.0117488
Cramp1l	0.00202585	1	-0.0133776	1	-0.00165918	1	-0.0412479	1	1	-0.0135647
Crat	0.00746035	1	-0.0274061	1	0.00598043	1	-0.0195753	1	1	-0.00838515
Crbn	-0.0237922	1	0.0622229	1	-0.00815852	1	-0.0908528	1	1	-0.0151452
Crcp	-0.0178063	1	-0.021249	1	-0.00987888	1	-0.0417674	1	1	-0.0226754
Creb1	0.0509343	1	0.0817595	1	0.0138236	1	-0.0111118	1	1	0.0338514
Creb3	0.0224471	1	0.0125607	1	-0.0246343	1	-0.0737988	1	1	-0.0158563
Creb3l2	-0.00158989	1	0.00129378	1	0.00364907	1	-0.0251665	1	1	-0.0054534
Creb5	-0.0423409	1	0.161567	1	0.0232971	1	-0.0617139	1	1	0.0202024
Crebbp	-0.0214212	1	-0.000811277	1	-0.0343331	1	0.0963408	1	1	0.00994381
Crebl2	0.0164951	1	-0.0180823	1	-0.00655434	1	-0.0124082	1	1	-0.00513745
Crebrf	-0.0126851	1	0.104661	1	-0.0352937	1	-0.0390612	1	1	0.00440538
Crebzf	-0.00997534	1	0.0871394	1	-0.0183867	1	0.0223596	1	1	0.0202842
Creg1	-0.0137273	1	-0.0273886	1	-0.0647582	1	-0.04241	1	1	-0.037071
Creld1	-0.0218443	1	-0.0172723	1	-0.0226771	0.18938	-0.0179879	1	0.912121	-0.0199454
Creld2	-0.013173	1	0.0133447	1	0.0388803	1	-0.019016	1	1	0.00500902
Crem	0.0297509	1	-0.136273	1	0.0138036	1	0.0194639	1	1	-0.0183137
Crim1	-0.00909581	1	0.0515272	1	0.00842145	1	-0.0094355	1	1	0.0103543
[truncated: 8,384 more rows]

## Sheet: Clone473_FindMarkers_by_expt
gene	logFC.Veh.ExptC	adj.p.Veh.ExptC	logFC.Veh.ExptD	adj.p.Veh.ExptD	logFC.Veh.ExptA	adj.p.Veh.ExptA	logFC.Veh.ExptB	adj.p.Veh.ExptB	fisher.combined.pvalue	mean.logFC
0610009B22Rik	0.0410548	1	0.101686	1	-0.0137105	1	-0.0184872	1	1	0.0276357
0610009O20Rik	0.0198035	1	-0.0165961	1	0.0423768	1	0.0581912	1	1	0.0259438
0610010F05Rik	0.0512366	1	0.039182	1	0.0354019	1	0.00554876	1	1	0.0328423
0610010K14Rik	0.0130999	1	0.00967122	1	0.0666176	1	0.155861	1	1	0.0613125
0610012G03Rik	0.0742649	1	0.0683126	1	0.0752471	1	-0.0506726	1	1	0.041788
0610030E20Rik	0.0486272	1	0.0226514	1	0.0158304	1	0.0532181	1	1	0.0350818
0610037L13Rik	0.0108554	1	-0.0455471	1	0.0386559	1	0.0471766	1	1	0.0127852
0610038B21Rik	0.00328854	1	-0.00140137	1	0.00656516	1	0.0064351	1	1	0.00372186
1110002L01Rik	0.00344196	1	0.00685387	1	0.00174334	1	-0.00755067	1	1	0.00112213
1110004E09Rik	0.0603746	1	-0.039051	1	0.0511439	1	-0.0182658	1	1	0.0135504
1110004F10Rik	0.0172481	1	-0.0624217	1	0.068533	1	-0.0952143	1	1	-0.0179637
1110008F13Rik	0.0110472	1	-0.0488448	1	-0.0284682	1	0.0818527	1	1	0.00389675
1110008L16Rik	0.00449916	1	-0.00326908	1	-0.00800101	1	0.00754849	1	1	0.00019439
1110008P14Rik	0.40663	1	0.0465534	1	0.184727	1	0.214048	1	1	0.21299
1110012L19Rik	-0.00583992	1	0.00954806	1	-0.0097364	1	0.0776783	1	1	0.0179125
1110019D14Rik	-0.0100574	1	-0.00592623	1	-0.0128384	1	0.000383571	1	1	-0.00710961
1110032A03Rik	-0.0441943	1	-0.0395424	1	-0.00134177	1	-0.0133492	1	1	-0.0246069
1110034G24Rik	0.0163038	1	0.0157886	1	0.00570259	1	0.0735962	1	1	0.0278478
1110035H17Rik	0.00816317	1	0.0179502	1	0.0120791	1	0.0111325	1	1	0.0123312
1110038F14Rik	-0.111455	1	-0.164152	1	-0.0658766	1	-0.0939093	1	1	-0.108848
1110046J04Rik	-0.0609884	1	-0.0528469	1	-0.0139334	1	-0.0471827	1	1	-0.0437379
1110059E24Rik	0.0260274	1	0.0357106	1	0.0726866	1	-0.026563	1	1	0.0269654
1110059G10Rik	-0.00899896	1	0.30513	1	0.0072704	1	0.0291393	1	1	0.0831352
1110065P20Rik	0.0896359	1	0.102215	1	-0.00431696	1	-0.0582531	1	1	0.0323201
1190002N15Rik	0.00494198	1	0.00336003	1	-0.00284566	1	-0.00134915	1	1	0.0010268
1190005I06Rik	-0.00166961	1	0.016771	1	0.00314318	1	3.10741e-05	1	1	0.00456892
1190007I07Rik	0.0232498	1	0.0313427	1	-0.0272763	1	-0.0205418	1	1	0.00169358
1300002E11Rik	-0.0164876	1	-0.0260332	1	0.0134849	1	-0.0291295	1	1	-0.0145414
1500011B03Rik	0.0446878	1	-0.0579069	1	0.0264982	1	0.0996651	1	1	0.0282361
1500011K16Rik	-0.0995414	1	0.182698	1	-0.0271397	1	0.0346585	1	1	0.0226688
1500015A07Rik	0.0132276	1	0.00228309	1	-0.00299898	1	0.0312313	1	1	0.0109358
1600002K03Rik	0.0260031	1	-0.0916719	1	0.0237118	1	-0.00352266	1	1	-0.0113699
1600012H06Rik	-0.0212464	1	0.0648547	1	0.0158003	1	-0.0631007	1	1	-0.000923024
1600014C10Rik	-0.0085475	1	0.00369201	1	-0.00125821	1	0.00482923	1	1	-0.000321118
1600020E01Rik	0.024307	1	0.0778679	1	0.00303737	1	0.0119056	1	1	0.0292795
1700006J14Rik	-0.000116153	1	-0.0243308	1	0.0208604	1	-0.00668309	1	1	-0.0025674
1700008J07Rik	0.0341663	1	-0.0103992	1	0.026079	1	-0.00106648	1	1	0.0121949
1700017B05Rik	-0.0472975	1	-0.0581553	1	-0.00601414	1	0.0265448	1	1	-0.0212305
1700019L13Rik	-0.0130363	1	-0.00909406	1	0.00605502	1	-0.0313513	1	1	-0.0118567
1700020I14Rik	0.0789134	1	-0.0386303	1	0.0471661	1	0.10549	1	1	0.0482349
1700021F05Rik	-0.0630854	1	-0.0825974	1	-0.02725	1	-0.00995681	1	1	-0.0457224
1700025G04Rik	-0.0496427	1	0.0240318	1	-0.0490393	1	-0.0701514	1	1	-0.0362004
1700030J22Rik	-0.00115255	1	0.0173461	1	0.00689781	1	0.00642727	1	1	0.00737964
1700030K09Rik	0.0585449	1	0.015702	1	0.000511336	1	-0.114331	1	1	-0.00989326
1700037C18Rik	0.00886881	1	-0.00877022	1	0.0122933	1	0.0134144	1	1	0.00645158
1700037H04Rik	0.0220169	1	0.104624	1	0.0205494	1	0.116859	1	1	0.0660126
1700052K11Rik	-0.00827559	1	0.0158813	1	-0.0126562	1	0.0188156	1	1	0.00344128
1700056E22Rik	-0.0124353	1	0.0244228	1	-0.00070614	1	-0.0101349	1	1	0.000286602
1700086O06Rik	0.0788472	1	0.0716327	1	0.02016	1	0.000750016	1	1	0.0428475
1700088E04Rik	-0.0248931	1	0.0300438	1	0.0385164	1	-0.0243993	1	1	0.00481694
1700109H08Rik	-0.00682682	1	-0.0140875	1	-0.0100778	1	0.0104702	1	1	-0.00513046
1700113A16Rik	-0.0126844	1	0.0269714	1	0.0193107	1	-0.0268397	1	1	0.00168951
1700123O20Rik	-0.0117524	1	-0.106605	1	-0.0822003	1	-0.0674886	1	1	-0.0670116
1810009A15Rik	0.02937	1	0.175702	1	0.0164685	1	-0.00191475	1	1	0.0549063
1810013L24Rik	0.00157179	1	-0.0812368	1	-0.00397854	1	-0.0120475	1	1	-0.0239228
1810022K09Rik	-0.0133438	1	0.243383	1	0.0182193	1	0.0701448	1	1	0.0796008
1810030O07Rik	0.00479319	1	-0.00510253	1	0.0107902	1	0.00564431	1	1	0.0040313
1810032O08Rik	0.0109073	1	0.138371	1	0.0416596	1	-0.0155299	1	1	0.043852
1810037I17Rik	-0.139763	1	0.0540555	1	-0.067605	1	-0.0524375	1	1	-0.0514375
1810043G02Rik	0.0104184	1	0.116561	1	0.0763968	1	0.0141381	1	1	0.0543786
1810044D09Rik	-0.00872216	1	-0.00112927	1	-0.0134754	1	0.0208611	1	1	-0.000616439
1810055G02Rik	0.0412172	1	-0.0986592	1	0.0103894	1	0.113149	1	1	0.0165242
1810058I24Rik	-0.0271888	1	0.12554	1	-0.0662263	1	0.088995	1	1	0.0302799
1810062G17Rik	-0.020046	1	-0.0236171	1	-0.0138329	1	-0.00937833	1	1	-0.0167186
2010107E04Rik	-0.421669	5.09091e-11	-0.117195	1	-0.260088	3.96099e-13	-0.204756	0.0883011	5.12928e-20	-0.250927
2010111I01Rik	-0.0770337	1	-0.0251409	1	-0.0576835	1	-0.0705031	1	1	-0.0575903
2010300F17Rik	0.0442836	1	-0.0413367	1	-0.0286359	1	-0.0291008	1	1	-0.0136974
2010315B03Rik	-0.015651	1	-0.00293842	1	0.00475411	1	-0.0217067	1	1	-0.0088855
2010320M18Rik	0.144247	0.0179737	-0.00332772	1	0.0385479	1	0.0356912	1	0.429797	0.0537895
2200002D01Rik	-0.00221864	1	0.0244985	1	-0.0323753	1	-0.101756	1	1	-0.027963
2210016F16Rik	-0.00932922	1	-0.018538	1	0.0126838	1	0.00715495	1	1	-0.00200712
2210016L21Rik	0.0533472	1	-0.0790715	1	-0.0332747	1	0.108686	1	1	0.0124216
2210408I21Rik	0.00193265	1	-0.0398796	1	-0.00709244	1	0.0097114	1	1	-0.008832
2300009A05Rik	-0.0169494	1	0.111512	1	0.0036924	1	-0.0158236	1	1	0.0206078
2310001H17Rik	0.016526	1	0.0130531	1	0.0451558	1	0.0215856	1	1	0.0240801
2310009B15Rik	-0.123706	1	-0.0457266	1	-0.0504778	1	-0.101754	1	1	-0.0804162
2310011J03Rik	0.0670458	1	0.0189625	1	0.0274004	1	0.136518	1	1	0.0624817
2310022A10Rik	0.00141516	1	0.0298673	1	0.000770506	1	-0.0239107	1	1	0.00203558
2310022B05Rik	-0.0189408	1	-0.0470007	1	-0.00312057	1	0.0294961	1	1	-0.00989148
2310030G06Rik	0.0378081	1	-0.0353847	1	0.0493894	1	0.0744937	1	1	0.0315766
2310033P09Rik	0.0511845	1	-0.074338	1	-0.00209933	1	-0.0371792	1	1	-0.015608
2310035C23Rik	-0.0421375	1	0.0472846	1	0.000124728	1	0.000663283	1	1	0.00148376
2310039H08Rik	0.183758	0.120775	0.182384	1	0.0791285	1	0.0582206	1	0.836021	0.125873
2310057M21Rik	-0.00293863	1	0.0037075	1	0.0295692	1	-0.0304715	1	1	-3.33471e-05
2310061I04Rik	0.089232	1	0.0129603	1	0.0423163	1	-0.00892206	1	1	0.0338967
2410002F23Rik	0.0799734	1	-0.11184	1	0.0143119	1	-0.0339684	1	1	-0.0128808
2410004B18Rik	-0.0222063	1	-0.053942	1	-0.0589938	1	-0.0638169	1	1	-0.0497398
2410015M20Rik	-0.0611726	1	-0.181879	1	-0.0934654	1	-0.0798235	1	1	-0.104085
2410089E03Rik	-0.0863422	1	0.00765384	1	-0.0683183	1	-0.0554298	1	1	-0.0506091
2410131K14Rik	-0.0144819	1	0.0164233	1	0.0226434	1	0.0171229	1	1	0.0104269
2510002D24Rik	-0.0360925	1	-0.0506379	1	-0.00735907	1	0.0629185	1	1	-0.00779275
2510017J16Rik	0.0195619	1	-0.00135664	1	-0.00830526	1	-0.00173973	1	1	0.00204006
2510039O18Rik	0.0262551	1	-0.0675013	1	0.0117038	1	0.047406	1	1	0.00446592
2510046G10Rik	0.0181532	1	-0.000760726	1	0.00867781	1	-0.0382128	1	1	-0.00303562
2610001J05Rik	0.0420737	1	0.11596	1	-0.00911344	1	-0.05464	1	1	0.0235701
2610002M06Rik	-0.0162067	1	0.0346214	1	0.0479695	1	0.00867039	1	1	0.0187636
2610008E11Rik	0.0190026	1	-0.0272907	1	0.0117384	1	0.0324459	1	1	0.00897403
2610020C07Rik	0.0143408	1	0.00778111	1	0.0150439	1	-0.0161797	1	1	0.00524651
2610021A01Rik	-0.000403741	1	-0.0189099	1	0.00575149	1	0.00703713	1	1	-0.00163127
2610037D02Rik	0.00908538	1	0.0325129	1	0.0122592	1	0.0202233	1	1	0.0185202
2610044O15Rik8	0.023168	1	-0.00670085	1	0.0308029	1	0.0442749	1	1	0.0228862
2610301B20Rik	0.00574974	1	-0.0222491	1	0.000768333	1	-0.0580817	1	1	-0.0184532
2610507B11Rik	0.157393	1	0.0967415	1	0.0425853	1	0.00632525	1	1	0.0757612
2700016F22Rik	-0.0138101	1	-0.0663613	1	0.00285144	1	0.000153974	1	1	-0.0192915
2700038G22Rik	0.0103115	1	0.0416992	1	0.0475793	1	-0.00389036	1	1	0.0239249
2700049A03Rik	-0.0363111	1	-0.00277449	1	0.00550895	1	-0.0326258	1	1	-0.0165506
2700062C07Rik	-0.0179218	1	-0.0428826	1	0.0168879	1	0.0587486	1	1	0.00370802
2700081O15Rik	-0.0250995	1	-0.0208161	1	0.034497	1	0.0893932	1	1	0.0194936
2700097O09Rik	-0.00399949	1	-0.0449546	1	-0.0220999	1	0.0253748	1	1	-0.0114198
2810001G20Rik	0.0158041	1	0.00352678	1	0.00911213	1	0.00757156	1	1	0.00900363
2810004N23Rik	0.11208	1	0.144309	1	0.140082	0.47477	0.171206	1	0.992875	0.141919
2810006K23Rik	-0.00505792	1	-0.00457938	1	0.00510596	1	-0.0541337	1	1	-0.0146663
2810402E24Rik	-0.0121337	1	0.080899	1	-0.0085892	1	0.0360327	1	1	0.0240522
2810403A07Rik	-0.0380991	1	-0.0256319	1	0.0195512	1	-0.0146454	1	1	-0.0147063
2810408A11Rik	0.00621325	1	0.0732115	1	0.0295842	1	0.0158499	1	1	0.0312147
2810454H06Rik	0.0234703	1	0.187589	1	0.0039702	1	-0.0220427	1	1	0.0482468
2810457G06Rik	-0.0185773	1	0.00367576	1	-0.0165721	1	-0.0152155	1	1	-0.0116723
2810474O19Rik	-0.024334	1	-0.048969	1	0.121721	1	-0.0734992	1	1	-0.00627021
2900009J06Rik	-0.0272684	1	-0.0335572	1	0.0105092	1	0.0191651	1	1	-0.00778783
2900026A02Rik	0.0405494	1	0.00650968	1	0.0224503	1	-0.00517899	1	1	0.0160826
2900060B14Rik	0.0582068	1	-0.0202216	1	0.0128049	1	0.0551816	1	1	0.026493
2900076A07Rik	0.00653333	1	-6.48869e-05	1	0.012603	1	-0.002761	1	1	0.0040776
2900093K20Rik	-0.0171245	1	0.0669296	1	4.57363e-05	1	-0.0198944	1	1	0.00748914
2900097C17Rik	0.0448674	1	0.320701	1	-0.0291807	1	-0.0417063	1	1	0.0736703
3010003L21Rik	0.00374915	1	-0.0206083	1	0.0113249	1	-0.0110713	1	1	-0.0041514
3110002H16Rik	-0.00278691	1	0.065129	1	0.0131271	1	0.0449156	1	1	0.0300962
3110009E18Rik	-0.0153287	1	-0.0206469	1	0.0307274	1	-0.022802	1	1	-0.00701256
3110040N11Rik	-0.024304	1	-0.0293883	1	0.0248182	1	-0.0127062	1	1	-0.0103951
3110043O21Rik	-0.0166414	1	0.0699696	1	0.0549229	1	0.0821431	1	1	0.0475986
3110062M04Rik	-0.00901684	1	0.0639451	1	0.0176888	1	0.000615843	1	1	0.0183082
3110082I17Rik	0.0310551	1	-0.0030138	1	0.0161406	1	0.0125496	1	1	0.0141829
3300005D01Rik	0.109889	1	-0.110075	1	-0.0635718	1	0.0488891	1	1	-0.00371725
3830406C13Rik	0.012926	1	-0.0578073	1	-0.014484	1	-0.0581747	1	1	-0.029385
4632415L05Rik	0.0360806	1	0.0276426	1	0.0190754	1	0.0327625	1	1	0.0288903
4732491K20Rik	-0.00391658	1	-0.00147473	1	0.0136351	1	-0.00704999	1	1	0.000298446
4833420G17Rik	0.0765496	1	0.0233687	1	0.0017293	1	-0.0074107	1	1	0.0235592
4833439L19Rik	0.0225148	1	-0.019502	1	0.0317655	1	0.0162883	1	1	0.0127666
4921524J17Rik	0.22219	1	0.0698435	1	0.0689704	1	0.0842835	1	1	0.111322
4930402H24Rik	0.000491461	1	-0.0139279	1	-0.015253	1	-0.00610146	1	1	-0.00869774
4930430F08Rik	0.00877962	1	-0.00939673	1	-0.0153258	1	-0.0117376	1	1	-0.00692014
4930453N24Rik	-0.0073692	1	0.0389864	1	0.0451903	1	-0.0425473	1	1	0.00856504
4930471E19Rik	-0.0129391	1	-0.014304	1	-0.00472825	1	-6.69593e-05	1	1	-0.00800958
4930503L19Rik	-0.0084105	1	-0.0108091	1	-0.0205875	1	0.0101347	1	1	-0.00741813
4930522L14Rik	0.000579736	1	-0.000839896	1	-0.00481144	1	0.00769767	1	1	0.000656516
4930523C07Rik	0.142265	1	-0.0774578	1	0.0913645	1	0.106064	1	1	0.065559
4930579C12Rik	0.118444	0.90528	-0.00150074	1	0.278625	4.07863e-08	0.0357927	1	3.69248e-05	0.10784
4930579G24Rik	-0.0120708	1	0.00677007	1	0.00142294	1	-0.0142302	1	1	-0.004527
4931406C07Rik	-0.00749715	1	0.179028	1	0.0271339	1	0.140034	1	1	0.0846746
4931406P16Rik	0.05573	1	-0.0853263	1	0.0346243	1	0.0328754	1	1	0.00947586
4931428F04Rik	0.0110308	1	0.0196803	1	0.00880523	1	0.0217835	1	1	0.0153249
4932422M17Rik	0.19184	1	0.252845	1	-0.0397843	1	-0.0224935	1	1	0.0956019
4932438A13Rik	-0.0522382	1	-0.0664723	1	-0.0298895	1	-0.0444713	1	1	-0.0482678
4933404O12Rik	0.00160882	1	-0.0105506	1	-0.00608549	1	0.0122865	1	1	-0.000685189
4933427D14Rik	0.000667574	1	-0.0528382	1	0.0250894	1	-0.000212791	1	1	-0.00682352
4933434E20Rik	-0.0765184	1	-0.140672	1	-0.116337	0.166483	-0.0401903	1	0.892435	-0.0934294
5031425E22Rik	-0.0665208	1	-0.0275696	1	-0.0650857	1	-0.0291727	1	1	-0.0470872
5031439G07Rik	-0.0120909	1	-0.0465587	1	-0.0100619	1	-0.00705766	1	1	-0.0189423
5033406O09Rik	-0.00780528	1	-0.0451788	1	-0.0141796	1	0.00848568	1	1	-0.0146695
5033430I15Rik	0.00968536	1	0.0203337	1	0.0246773	1	-0.00395494	1	1	0.0126854
5430403G16Rik	0.00529332	1	-0.00847761	1	0.000200057	1	0.0147198	1	1	0.00293389
5430416N02Rik	0.0569497	1	-0.149656	1	0.0740034	1	-0.00971952	1	1	-0.00710561
5730409E04Rik	-0.0156321	1	-0.0124323	1	0.00208344	1	-0.0141478	1	1	-0.0100322
5730455P16Rik	0.00245146	1	-0.034219	1	-0.000429605	1	-0.00832737	1	1	-0.0101311
5730480H06Rik	0.051297	1	0.0618196	1	0.0286119	1	0.00871852	1	1	0.0376118
5730559C18Rik	-0.0151368	1	-0.0301778	1	0.000926555	1	-0.0217634	1	1	-0.0165379
5930430L01Rik	-0.0129199	1	0.00292226	1	0.00828812	1	0.00648979	1	1	0.00119508
6030458C11Rik	-0.016127	1	-0.0469078	1	-0.0524192	1	-0.0029781	1	1	-0.029608
6330403L08Rik	-0.0209741	1	0.00782144	1	-0.00252272	1	-0.0066357	1	1	-0.00557776
6330418K02Rik	0.00380805	1	-0.00214802	1	0.00946681	1	0.00597408	1	1	0.00427523
6330562C20Rik	0.00312335	1	-0.0104691	1	-0.0021635	1	0.0134063	1	1	0.000974257
6720489N17Rik	-0.00383523	1	0.00815179	1	0.00891686	1	0.00630774	1	1	0.00488529
8030462N17Rik	0.0193588	1	-0.0337028	1	0.00939377	1	-0.00942142	1	1	-0.00359289
9030025P20Rik	0.00794793	1	-0.0108679	1	0.00882647	1	0.0501666	1	1	0.0140183
9030624J02Rik	0.031854	1	-0.0276624	1	-0.00588026	1	-0.0440336	1	1	-0.0114306
9130008F23Rik	-0.0043489	1	0.038974	1	0.0299407	1	0.0116993	1	1	0.0190663
9130401M01Rik	0.122232	1	0.318932	1	0.175707	1	0.126663	1	1	0.185884
9230102O04Rik	-0.0129262	1	-0.0256577	1	-0.00969592	1	-0.00532205	1	1	-0.0134005
9230110C19Rik	0.0114254	1	0.0157943	1	0.00393336	1	0.0304874	1	1	0.0154101
9330020H09Rik	-0.00828187	1	-0.00971985	1	-0.000227268	1	0.00788521	1	1	-0.00258595
9330175E14Rik	-0.0120005	1	-0.0161432	1	0.0356584	1	-3.44578e-05	1	1	0.00187007
9430015G10Rik	-0.00745905	1	-0.00988585	1	0.0292736	1	-0.00339059	1	1	0.00213452
9430037G07Rik	0.0482072	1	0.0684598	1	0.0707265	0.000192501	0.13045	1	0.0289756	0.079461
9430038I01Rik	0.0178539	1	0.0184176	1	0.0290599	1	0.00620174	1	1	0.0178833
9530068E07Rik	0.071616	1	-0.0288595	1	0.077929	1	-0.0213774	1	1	0.024827
9530077C05Rik	0.00392333	1	0.00327437	1	0.0360581	1	-0.00586459	1	1	0.00934779
9530082P21Rik	0.0184819	1	0.0385738	1	0.0642052	1	0.0617282	1	1	0.0457473
9930021J03Rik	0.0456528	1	0.0206548	1	0.0691263	1	0.163452	1	1	0.0747215
9930111J21Rik2	0.00544739	1	0.0313558	1	0.0296834	1	0.0411894	1	1	0.026919
A130010J15Rik	-0.0180884	1	-0.00683933	1	0.00908343	1	0.0102895	1	1	-0.0013887
A130051J06Rik	0.0215195	1	-0.0385414	1	-0.0178916	1	-0.0267432	1	1	-0.0154142
A230050P20Rik	-0.0263007	1	-0.0372984	1	-0.0381199	1	-0.066358	1	1	-0.0420193
A330069E16Rik	-0.0270576	1	-0.0555556	1	0.00464732	1	0.0293777	1	1	-0.012147
A330074K22Rik	0.00295412	1	0.0246122	1	-0.000729823	1	0.0204277	1	1	0.011816
A430005L14Rik	-0.0182214	1	-0.0067179	1	0.0161609	1	-0.029071	1	1	-0.00946234
A430033K04Rik	0.0122753	1	0.0119358	1	-0.00206252	1	0.0169731	1	1	0.00978041
A430105I19Rik	0.000358161	1	-0.00698796	1	0.0072799	1	-0.000295047	1	1	8.87631e-05
A530017D24Rik	0.00461768	1	-0.00466254	1	0.0116099	1	0.00180088	1	1	0.00334148
A630001G21Rik	-0.0257926	1	-0.0183401	1	-0.016874	1	-0.0196503	1	1	-0.0201643
A630072M18Rik	-0.00262484	1	0.00738267	1	0.0242279	1	0.0284049	1	1	0.0143476
A630089N07Rik	0.0270026	1	0.012472	1	0.00932785	1	0.0162374	1	1	0.01626
A830010M20Rik	0.00278266	1	0.00368375	1	-0.000325512	1	-0.00659558	1	1	-0.000113668
A830082K12Rik	-0.0320699	1	-0.064381	1	-0.0251522	1	0.0103433	1	1	-0.0278149
A930004D18Rik	0.0103473	1	-0.0347223	1	-0.00342085	1	-0.00533595	1	1	-0.00828295
A930015D03Rik	0.0773657	1	0.14847	1	0.0083844	1	0.0018466	1	1	0.0590167
AA467197	-0.0998458	1	-0.246777	1	0.0495733	1	-0.125163	1	1	-0.105553
Aaas	0.00971087	1	-0.00215209	1	0.0135277	1	0.100561	1	1	0.030412
Aacs	0.0318201	1	0.0195206	1	0.00380723	1	0.0467466	1	1	0.0254736
Aaed1	-0.0367635	1	-0.0529532	1	-0.0432798	1	-0.0868054	1	1	-0.0549505
Aagab	0.0107708	1	-0.0169439	1	0.00595119	1	0.0297116	1	1	0.00737242
Aak1	0.0202167	1	-0.053877	1	-0.00313573	1	0.0273093	1	1	-0.00237168
Aamdc	-0.0122248	1	-0.0402159	1	-0.00371394	1	-0.00114679	1	1	-0.0143253
Aamp	-0.060003	1	0.0650426	1	-0.0657121	1	-0.0616026	1	1	-0.0305688
Aar2	0.014438	1	0.0691625	1	-0.00146741	1	-0.00100585	1	1	0.0202818
Aars	-0.0324884	1	-0.098398	1	0.0285353	1	0.0362824	1	1	-0.0165172
Aars2	-0.0176069	1	-0.0183676	1	0.00157707	1	0.00948882	1	1	-0.00622716
Aarsd1	-0.018332	1	0.040449	1	0.0148836	1	0.00910789	1	1	0.0115271
Aasdh	-0.00216591	1	0.0311858	1	-0.000877438	1	0.00596308	1	1	0.00852639
Aasdhppt	0.0873075	1	0.0591991	1	0.0163421	1	-0.00731404	1	1	0.0388837
Aatf	0.0667183	1	0.164509	1	0.0490799	1	0.116817	1	1	0.099281
Aatk	-0.00621047	1	-0.0176196	1	-0.0216447	1	0.00454527	1	1	-0.0102324
Abca2	0.0186154	1	0.0096858	1	0.0119421	1	-0.00171866	1	1	0.00963114
Abca3	0.015851	1	-0.0358138	1	0.0190783	1	0.0469928	1	1	0.0115271
Abca7	-0.0425308	1	0.0094245	1	-0.00587661	1	0.014011	1	1	-0.00624298
Abcb10	0.0707674	1	-0.00135916	1	0.0410542	1	0.010648	1	1	0.0302776
Abcb1a	-0.0285368	1	-0.00991994	1	-0.0293326	1	-0.0106333	1	1	-0.0196057
Abcb1b	-0.0567528	1	-0.136729	1	-0.0402782	1	-0.087233	1	1	-0.0802481
Abcb7	0.0421828	1	-0.00663069	1	0.0131171	1	0.0336869	1	1	0.020589
Abcb8	0.062137	1	0.0721817	1	0.0197183	1	0.0679599	1	1	0.0554992
Abcc1	0.0418503	1	-0.0491424	1	-0.00643967	1	-0.0404486	1	1	-0.0135451
Abcc3	0.015496	1	0.0921345	1	0.0309465	1	0.131828	1	1	0.0676011
Abcc5	-0.04033	1	0.0093387	1	-0.0106517	1	-0.00484303	1	1	-0.0116215
Abcd1	0.0451403	1	0.00240681	1	0.00843668	1	0.00770323	1	1	0.0159218
Abcd3	-0.0258593	1	-0.0729618	1	0.00585494	1	-0.0190903	1	1	-0.0280141
Abcd4	0.042969	1	0.104211	1	0.0308699	1	0.0512221	1	1	0.057318
Abce1	0.122393	1	0.0412373	1	0.0986511	1	0.137717	1	1	0.0999995
Abcf1	0.0420505	1	0.193666	1	0.0545201	1	0.0883182	1	1	0.0946388
Abcf2	0.0484259	1	0.0857847	1	0.0212622	1	0.0109752	1	1	0.041612
Abcf3	0.031518	1	-0.0306743	1	-0.00294372	1	-0.013685	1	1	-0.00394625
Abcg2	-0.0123376	1	-0.0415764	1	-0.139318	1	-0.0381262	1	1	-0.0578395
Abhd10	-0.00398999	1	0.0216979	1	0.0411752	1	0.012468	1	1	0.0178378
Abhd11	0.171193	0.0809388	-0.0539629	1	0.0703193	1	0.0595797	1	0.754566	0.0617822
Abhd12	-0.0140343	1	0.0688197	1	-0.0399122	1	-0.026799	1	1	-0.00298146
Abhd13	0.0134284	1	-0.0264554	1	0.00946834	1	0.0161464	1	1	0.00314693
Abhd14a	-0.00699244	1	0.0128381	1	-0.0271214	1	0.0241292	1	1	0.000713364
Abhd14b	0.0282036	1	0.0743679	1	0.0352514	1	0.0525666	1	1	0.0475974
Abhd16a	0.00233142	1	-0.0861314	1	0.00970124	1	0.0806015	1	1	0.00162569
Abhd17a	-0.0100075	1	0.0181919	1	-0.0132815	1	0.041831	1	1	0.00918349
Abhd17b	0.0316824	1	0.366182	1	0.0547738	1	-0.0242248	1	1	0.107103
Abhd17c	0.033312	1	0.0117038	1	0.0475472	1	0.0366199	1	1	0.0322957
Abhd18	-0.0264444	1	-0.0446824	1	-0.0357575	1	-0.00850099	1	1	-0.0288463
Abhd2	-0.0851479	1	-0.0947129	1	-0.0388685	1	0.18719	1	1	-0.00788479
Abhd4	-0.0318354	1	0.0776943	1	-0.00564573	1	-0.00895443	1	1	0.00781468
Abhd5	-0.098815	1	-0.127162	1	-0.0375033	1	0.0224302	1	1	-0.0602624
Abhd6	-0.0317821	1	-0.0264939	1	-0.0123649	1	-0.0311401	1	1	-0.0254453
Abhd8	0.0749299	1	0.0302321	1	0.0751147	1	0.122873	1	1	0.0757875
Abi1	-0.110647	1	-0.187142	1	-0.0511633	1	-0.101215	1	1	-0.112542
Abi2	-0.0338949	1	0.00794075	1	-0.0117061	1	-0.0922566	1	1	-0.0324792
Abl1	0.0248488	1	0.235705	1	0.0152241	1	0.000705217	1	1	0.0691207
Abl2	-0.0287834	1	0.0084107	1	-0.00235714	1	-0.0567881	1	1	-0.0198795
Ablim1	-0.02145	1	-0.0329871	1	-0.0210658	1	0.00690491	1	1	-0.0171495
Abr	0.0367219	1	-0.0685873	1	-0.0138018	1	-0.0112152	1	1	-0.0142206
Abracl	0.0639316	1	-0.017964	1	-0.00875545	1	0.0219364	1	1	0.0147871
Abraxas1	-0.0199816	1	0.0517928	1	0.0204699	1	-0.0191484	1	1	0.00828319
Abraxas2	0.0237871	1	-0.00619756	1	0.0425379	1	0.137817	1	1	0.049486
Abt1	0.0329756	1	-0.0264704	1	0.0221429	1	-0.00139802	1	1	0.00681254
Abtb1	-0.00640785	1	-0.0113431	1	0.00182476	1	0.00462671	1	1	-0.00282486
Abtb2	0.0624871	1	-0.0189485	1	-0.000126886	1	0.0053726	1	1	0.0121961
AC127341.3	0.0143035	1	0.033217	1	-0.0281153	1	-0.0213674	1	1	-0.00049056
AC129328.1	0.0280254	1	-0.0114494	1	0.00388097	1	0.00376255	1	1	0.00605488
AC149090.1	0.0145275	1	0.240538	1	0.0788594	1	0.0385938	1	1	0.0931297
AC160336.1	-0.437313	1	-0.0573612	1	0.421053	1	-0.086917	1	1	-0.0401345
AC161165.2	0.0223956	1	0.0031883	1	0.00713583	1	0.0143012	1	1	0.0117552
AC163032.1	-0.00464157	1	-0.00463006	1	0.0113735	1	0.00438644	1	1	0.00162208
AC164424.1	0.0267804	1	0.00901073	1	0.0116797	1	0.00657322	1	1	0.013511
AC165953.2	0.00908439	1	-0.0492764	1	0.011121	1	0.092487	1	1	0.015854
Acaa1a	0.0518709	1	0.142101	1	0.00216215	1	0.0420171	1	1	0.0595377
Acaa1b	0.0156143	1	0.0588731	1	0.0121754	1	0.0992767	1	1	0.0464849
Acaa2	-0.0631251	1	-0.0518418	1	-0.0303019	1	-0.0563757	1	1	-0.0504111
Acaca	0.00621191	1	0.0475817	1	0.0140218	1	-0.042526	1	1	0.00632236
Acad8	-0.00734633	1	-0.0454535	1	0.0123295	1	-0.00084609	1	1	-0.0103291
Acad9	-0.027107	1	-0.0085228	1	-0.013823	1	-0.008599	1	1	-0.014513
Acadl	0.0596622	1	0.0791098	1	0.1395	1	0.194069	1	1	0.118085
Acadm	-0.00359142	1	-0.135777	1	-0.115578	0.838476	-0.032664	1	0.999965	-0.0719026
Acads	0.0940348	1	-0.00235706	1	-0.0228052	1	-0.0388683	1	1	0.00750107
Acadsb	-0.00769256	1	0.000259556	1	0.0181514	1	0.0613534	1	1	0.0180179
Acadvl	0.00713721	1	-0.0405404	1	-0.0800096	1	-0.00503186	1	1	-0.0296112
Acap1	-0.0715926	1	0.0243051	1	0.00286696	1	0.00651651	1	1	-0.00947602
Acap2	-0.0400908	1	0.00718167	1	-0.0371002	1	-0.0355285	1	1	-0.0263844
Acap3	0.00231877	1	-0.0534892	1	0.00847872	1	-0.0323128	1	1	-0.0187511
Acat1	0.061076	1	0.0512381	1	0.0299921	1	-0.0218206	1	1	0.0301214
Acat2	-0.0144075	1	0.110795	1	-0.0087009	1	-0.00622177	1	1	0.0203663
Acbd3	-0.116316	1	0.0657569	1	0.01234	1	0.0156736	1	1	-0.00563629
Acbd4	0.00353338	1	0.00367991	1	-0.00057366	1	-0.00991606	1	1	-0.000819108
Acbd5	-0.0816832	1	-0.0980883	1	-0.052845	1	-0.057205	1	1	-0.0724554
Acbd6	-0.0445059	1	0.0114018	1	-0.036977	1	-0.00566552	1	1	-0.0189366
Accs	-0.00710925	1	-0.000239216	1	0.00189203	1	0.00284084	1	1	-0.000653898
Acd	0.0130474	1	0.121263	1	0.0551894	1	-0.0655341	1	1	0.0309915
Ace	-0.204644	1	-0.224321	1	-0.268447	0.108364	-0.096936	1	0.814959	-0.198587
Acer3	0.0330329	1	-0.0633672	1	0.0507213	1	-0.0209587	1	1	-0.00014294
Acin1	-0.117224	1	-0.123473	1	-0.110188	1	-0.14537	1	1	-0.124064
Ackr3	-0.131942	1	-0.00380267	1	-0.125819	1	-0.101659	1	1	-0.0908058
Acly	-0.0762726	1	-0.0559787	1	-0.117554	0.438396	-0.0130543	1	0.989943	-0.065715
Aco1	0.0370336	1	-0.0065741	1	0.0263247	1	-0.0231812	1	1	0.00840076
Aco2	-0.069794	1	-0.00397672	1	-0.0503192	1	0.0308969	1	1	-0.0232983
Acod1	-0.0411623	1	-0.00448127	1	-0.00649211	1	-0.117523	1	1	-0.0424147
Acot13	-0.0237934	1	0.12635	1	0.0625233	1	0.0653709	1	1	0.0576126
Acot2	0.025773	1	0.067109	1	0.00418691	1	-0.0609186	1	1	0.0090376
Acot7	-0.000692979	1	-0.0114436	1	0.0092993	1	0.0375758	1	1	0.00868461
Acot8	-0.0346072	1	0.00665765	1	-0.0241186	1	-0.0131238	1	1	-0.016298
Acot9	0.0470945	1	-0.0230334	1	0.0302892	1	-0.0329823	1	1	0.005342
Acox1	0.0359204	1	-0.0545351	1	-0.0047666	1	0.0564915	1	1	0.00827755
Acox3	0.00522668	1	-0.00659925	1	0.00448098	1	-0.0106602	1	1	-0.00188795
Acp1	0.059652	1	0.0941322	1	-0.0201817	1	0.0583593	1	1	0.0479905
Acp2	0.00343508	1	-0.0668846	1	0.0187425	1	0.0183987	1	1	-0.00657705
Acp5	-0.0356646	1	0.211671	1	-0.120152	0.0333632	-0.0610242	1	0.558291	-0.00129255
Acp6	-0.0294437	1	-0.0686411	1	-0.0380253	1	-0.0483484	1	1	-0.0461146
Acpp	0.0557013	1	0.0354225	1	0.0388598	1	0.0192206	1	1	0.0373011
Acsbg1	-0.103126	1	-0.0101112	1	-0.0709585	1	-0.0315959	1	1	-0.053948
Acsf2	-0.00924258	1	-0.0076796	1	-0.00588495	1	0.00625607	1	1	-0.00413777
Acsf3	-0.0042216	1	0.00538972	1	-0.000452996	1	0.00428628	1	1	0.00125035
Acsl1	0.0130481	1	-0.00270302	1	0.00311778	1	-0.0146788	1	1	-0.000303985
Acsl3	-0.187698	1	8.55211e-05	1	-0.0947763	1	-0.0560771	1	1	-0.0846166
Acsl4	-0.112861	1	-0.0806625	1	-0.0967109	1	0.0712529	1	1	-0.0547453
Acsl5	0.211614	1	0.046811	1	0.150641	1	0.0653632	1	1	0.118607
Acsl6	0.00902132	1	-0.0220262	1	-0.00396161	1	-0.00636799	1	1	-0.00583362
Acss2	0.00278702	1	-0.0185301	1	0.00911131	1	0.0638276	1	1	0.014299
Acta2	-0.0187508	1	-0.0357132	1	0.000438168	1	0.000262448	1	1	-0.0134408
Actb	-0.01476	1	-0.048353	1	-0.0538413	1	0.0724731	1	1	-0.0111203
Actg1	0.0578438	1	-0.124355	1	0.101718	1	0.111079	1	1	0.0365714
Actl6a	0.00765557	1	-0.0601727	1	0.0284938	1	0.105822	1	1	0.0204496
Actn1	-0.042036	1	-0.143033	1	-0.0390481	1	0.0152025	1	1	-0.0522287
Actn4	0.0373816	1	0.120017	1	0.106558	0.366266	-0.0344409	1	0.980741	0.0573789
Actr10	-0.0830238	1	-0.0369277	1	-0.0147091	1	-0.0293006	1	1	-0.0409903
Actr1a	0.0465569	1	0.637666	1	0.115092	0.021214	0.0857549	1	0.462684	0.221267
Actr1b	-0.000143529	1	0.0746267	1	0.0396194	1	0.0555851	1	1	0.0424219
Actr2	0.0879505	1	0.0717308	1	0.120047	0.893211	0.168517	1	0.999994	0.112061
Actr3	-0.0265941	1	-0.0557821	1	0.0496995	1	-0.101101	1	1	-0.0334443
Actr5	0.016816	1	-0.00465898	1	0.00691584	1	0.0169878	1	1	0.00901518
Actr6	-0.0516681	1	0.0144836	1	-0.0076021	1	-0.0294497	1	1	-0.0185591
Actr8	-0.00178898	1	0.00137102	1	-0.0105599	1	-0.0196872	1	1	-0.00766625
Acvr1	-0.0632743	1	0.0324343	1	-0.0386485	1	0.051489	1	1	-0.00449985
Acvr1b	0.00609535	1	-0.0265827	1	0.00830434	1	-0.00737346	1	1	-0.00488911
Acvr2a	0.0062058	1	-0.0258128	1	-0.00848005	1	-0.002018	1	1	-0.00752627
Acvr2b	0.0322458	1	-0.00960324	1	0.00823497	1	-0.00285244	1	1	0.00700627
Acy1	0.0207364	1	0.0480353	1	0.0285632	1	0.0255728	1	1	0.0307269
Acyp1	-0.0645465	1	0.0260612	1	-0.0208719	1	0.146768	1	1	0.0218526
Acyp2	-0.0315427	1	-0.0149735	1	-0.0133821	1	-0.0884328	1	1	-0.0370828
Ada	0.0258968	1	0.00124444	1	0.0274873	1	0.00158894	1	1	0.0140544
Adal	0.00371927	1	0.0109223	1	0.00265259	1	0.00353466	1	1	0.0052072
Adam10	0.0099526	1	-0.00974965	1	-0.0582107	1	0.0114986	1	1	-0.0116273
Adam12	-0.0199451	1	-0.00729417	1	0.0136609	1	-0.000836173	1	1	-0.00360363
Adam15	-0.0793651	1	-0.16332	0.0513721	-0.0666731	0.178752	0.00814023	1	0.311194	-0.0753046
Adam17	-0.000324335	1	-0.0544552	1	-0.0251315	1	-0.122417	1	1	-0.050582
Adam19	0.0301223	1	0.0100612	1	-0.0258754	1	0.0054192	1	1	0.00493182
Adam33	0.0253233	1	-0.00226192	1	0.0210134	1	0.0587779	1	1	0.0257132
Adam8	0.0428723	1	-0.0353775	1	-0.0698122	1	0.00572021	1	1	-0.0141493
Adam9	0.0324272	1	0.082842	1	0.021472	1	0.107328	1	1	0.0610173
Adamts1	0.5018	1	0.0670871	1	0.0301315	1	0.245764	1	1	0.211196
Adamts10	-0.00132654	1	0.0343811	1	0.0164791	1	0.1208	1	1	0.0425835
Adamts14	-0.00642571	1	0.0143709	1	0.0142694	1	0.00921013	1	1	0.00785616
Adamts4	0.000306617	1	-0.00611184	1	0.0122793	1	0.0111299	1	1	0.00440099
Adamts6	0.0165599	1	-0.019163	1	0.00236241	1	0.0063376	1	1	0.00152423
Adamts8	-0.00728822	1	-0.0324947	1	0.00416921	1	0.00351682	1	1	-0.00802423
Adamts9	-0.0066122	1	0.00439317	1	0.0243052	1	0.0219101	1	1	0.0109991
Adamtsl3	-0.024508	1	-0.0778365	1	-0.029478	1	-0.014832	1	1	-0.0366636
Adar	-0.0168872	1	-0.0184631	1	0.0126179	1	-0.0183377	1	1	-0.0102675
Adarb1	-0.00574412	1	0.0446086	1	-0.0727984	1	-0.0509479	1	1	-0.0212205
Adat1	0.0181971	1	0.0775399	1	0.00724914	1	0.0417648	1	1	0.0361878
Adat2	-0.0381752	1	-0.0702133	1	-0.0291054	1	-0.0357812	1	1	-0.0433188
Adck1	0.0406118	1	0.0101214	1	0.0183688	1	0.00689532	1	1	0.0189993
Adck2	-0.000518592	1	0.0467693	1	0.0123152	1	0.000194111	1	1	0.01469
Adck5	-0.0254554	1	-0.0213053	1	-0.0234558	1	-0.0116238	1	1	-0.0204601
Adcy3	-0.00756413	1	-0.0286556	1	-0.0294993	1	0.074272	1	1	0.00213822
Adcy6	0.000321641	1	-0.011415	1	-0.0100595	1	0.0234875	1	1	0.000583647
Adcy7	-0.0176602	1	-0.0219183	1	-0.002317	1	0.0142041	1	1	-0.00692287
Add1	-0.0175441	1	-0.0723854	1	0.00782778	1	0.0172653	1	1	-0.0162091
Add2	-0.0740784	1	0.00550273	1	-0.0881921	6.27951e-06	-0.0254999	1	0.00233065	-0.0455669
Add3	-0.01192	1	0.0139249	1	0.0397352	1	-0.0656073	1	1	-0.00596679
Adgra3	0.00848327	1	0.0134582	1	0.0519181	1	0.00109455	1	1	0.0187385
Adgre5	-0.0190182	1	-0.0436977	1	0.00288388	1	-0.00145354	1	1	-0.0153214
Adgrg3	-0.0551784	1	-0.0180129	1	-0.0927804	0.0127602	-0.0254474	1	0.366213	-0.0478548
Adgrg6	-0.00776713	1	-0.0154146	1	-0.0362201	1	0.0237329	1	1	-0.00891724
Adgrl1	-0.0289855	1	0.0329896	1	-0.00335374	1	-0.0202706	1	1	-0.00490505
Adgrl2	0.0235889	1	-0.000470166	1	-0.0502035	1	-0.0316383	1	1	-0.0146808
Adh5	-0.130263	1	-0.228331	1	-0.0903278	1	-0.159003	1	1	-0.151981
Adi1	-0.00682587	1	-0.0561866	1	0.0163108	1	0.00758825	1	1	-0.00977836
Adipor1	0.0175034	1	0.0872217	1	0.0218853	1	0.0205297	1	1	0.036785
Adipor2	0.0903696	1	0.00031633	1	-0.0587922	1	0.0905285	1	1	0.0306056
Adk	-0.096223	1	-0.153979	1	-0.0732369	1	-0.0871491	1	1	-0.102647
Adm	-0.0589838	1	0.170219	1	0.0680703	1	-0.0180526	1	1	0.0403133
Adnp	-0.039232	1	0.0891793	1	0.0194358	1	0.00851535	1	1	0.0194746
Adnp2	-0.00843804	1	-0.0016248	1	-0.00190586	1	-0.00647006	1	1	-0.00460969
Ado	-0.0868332	1	-0.130161	1	-0.072113	1	-0.00489744	1	1	-0.0735012
Adpgk	-0.0179951	1	0.0363119	1	0.02652	1	0.0926047	1	1	0.0343604
Adprh	0.127975	1	0.116086	1	0.106762	0.257068	0.0438084	1	0.950853	0.098658
Adprhl2	0.0659243	1	0.0309551	1	0.0134315	1	0.0150276	1	1	0.0313346
Adprm	-0.0338873	1	-0.0119064	1	-0.00852626	1	-0.0385639	1	1	-0.023221
Adrb2	-0.0011418	1	-0.0399557	1	0.0124817	1	0.0196296	1	1	-0.00224657
Adrm1	0.0300251	1	-0.00615601	1	0.0479191	1	-0.0740486	1	1	-0.000565102
Adsl	-0.0260568	1	-0.0897549	1	-0.0132732	1	-0.0775648	1	1	-0.0516624
Adss	0.0297313	1	-0.0679437	1	0.0259869	1	0.0209657	1	1	0.00218505
Adssl1	-0.138671	1	-0.0967165	1	-0.0955462	3.2526e-05	-0.123292	1	0.00808682	-0.113556
Aebp2	-0.0475738	1	-0.146517	1	-0.0412873	1	-0.0176619	1	1	-0.06326
Aen	0.0367482	1	0.242879	1	0.0609979	1	-0.019931	1	1	0.0801735
Aes	0.0625862	1	0.236139	1	-0.0162763	1	0.0787626	1	1	0.0903028
Afap1	0.134956	1	-0.0970148	1	0.0736378	1	0.0632307	1	1	0.0437025
Afap1l2	-0.0146143	1	0.00296319	1	0.00171849	1	0.0413562	1	1	0.00785589
Afdn	0.078394	1	0.0084492	1	0.069589	1	0.0701766	1	1	0.0566522
Aff1	-0.0156826	1	0.0159978	1	-0.000259777	1	0.100938	1	1	0.0252483
Aff4	0.0430086	1	-0.068853	1	0.0359243	1	0.036631	1	1	0.0116777
Afg1l	0.000855663	1	-0.00602931	1	0.00265872	1	0.0103436	1	1	0.00195717
Afg3l1	0.0951659	1	0.156499	1	0.023407	1	0.12678	1	1	0.100463
Afg3l2	0.0933961	1	0.0874335	1	0.0125557	1	0.00845656	1	1	0.0504605
Afmid	0.00520955	1	-0.00579804	1	0.00135152	1	0.025514	1	1	0.00656926
Aftph	0.0378944	1	-0.0396699	1	0.0416616	1	0.0165071	1	1	0.0140983
Aga	-0.00228085	1	0.11609	1	-0.0316404	1	0.0256977	1	1	0.0269666
Agap1	-0.0300751	1	-0.06944	1	0.0209976	1	0.073705	1	1	-0.00120312
Agap3	0.0196916	1	0.0293265	1	0.0139993	1	-0.0155918	1	1	0.0118564
Agbl3	-0.0186342	1	0.17058	1	0.0200848	1	0.0157948	1	1	0.0469564
Agbl5	-0.00711654	1	0.00609628	1	0.0018147	1	0.0257047	1	1	0.00662478
Agfg1	-0.0333477	1	0.0018493	1	-0.0143248	1	-0.0415914	1	1	-0.0218536
Agfg2	0.0154212	1	0.038596	1	-0.00659874	1	-0.0209958	1	1	0.00660565
Aggf1	0.0564215	1	0.120755	1	0.0346511	1	-0.0394977	1	1	0.0430826
Agk	0.0164623	1	-0.0290429	1	0.0016654	1	0.00498799	1	1	-0.0014818
Agl	0.00320496	1	0.017835	1	0.00827116	1	-0.0588131	1	1	-0.00737549
Ago1	0.0373282	1	-0.0452043	1	-0.0223527	1	0.000663517	1	1	-0.00739131
Ago2	0.00075332	1	-0.22295	1	-0.0142649	1	0.0124337	1	1	-0.056007
Ago3	-0.0334679	1	0.0832827	1	0.0142234	1	-0.00927671	1	1	0.0136904
Agpat1	0.0731491	1	-0.0275229	1	-0.00208147	1	0.0433044	1	1	0.0217123
Agpat2	0.0190397	1	0.0210912	1	-0.0387587	1	-0.0154023	1	1	-0.00350754
Agpat3	0.0529679	1	-0.147165	1	0.0492705	1	0.0972296	1	1	0.0130757
Agpat4	-0.043353	1	-0.0687455	1	-0.0189755	1	-0.00400726	1	1	-0.0337703
Agpat5	-0.00432372	1	0.131438	1	0.0911725	1	0.0453067	1	1	0.0658984
Agps	0.00241106	1	-0.0534241	1	0.0319401	1	0.023605	1	1	0.00113302
Agrn	0.0256308	1	0.0508515	1	0.102523	1	0.114744	1	1	0.0734373
Agtpbp1	-0.00741837	1	-0.0250823	1	0.00800668	1	0.00826504	1	1	-0.00405725
Agtrap	0.0104369	1	-0.00302	1	0.0397577	1	0.0925558	1	1	0.0349326
Ahctf1	-0.079605	1	0.201237	1	0.0471887	1	0.00250814	1	1	0.0428322
Ahcy	-0.00383205	1	0.00204692	1	0.000820049	1	0.0121843	1	1	0.00280481
Ahcyl1	0.048249	1	-0.00671424	1	-0.0351814	1	-0.0186053	1	1	-0.00306298
Ahcyl2	-0.00152093	1	0.0333408	1	-0.0109059	1	-0.0118976	1	1	0.00225409
Ahdc1	-0.00807572	1	-0.0475458	1	-0.0129737	1	0.0649248	1	1	-0.000917617
Ahi1	-0.0438896	1	-0.0146437	1	0.0139512	1	0.00226001	1	1	-0.0105805
Ahnak	0.139658	1	0.0268677	1	0.093095	1	0.019582	1	1	0.0698007
Ahnak2	-0.0916527	1	-0.0900351	1	-0.177134	0.537692	-0.0312133	1	0.996221	-0.0975087
Ahr	-0.06204	1	-0.026569	1	-0.0984917	1	-0.0683917	1	1	-0.0638731
Ahsa1	0.0508451	1	0.0597937	1	0.0431382	1	-0.0325673	1	1	0.0303025
Ahsa2	0.0283607	1	-0.0216261	1	0.00214604	1	-0.0456283	1	1	-0.00918692
AI314180	-0.0536394	1	-0.0088295	1	0.00117402	1	0.0402129	1	1	-0.0052705
AI413582	-0.0361591	1	0.0640596	1	-0.0316921	1	0.033223	1	1	0.00735783
AI429214	0.0216354	1	0.0401042	1	-0.0100058	1	0.0280947	1	1	0.0199571
AI467606	0.00276143	1	0.0052178	1	0.0282494	1	0.120008	1	1	0.0390591
AI480526	0.0202255	1	0.0196407	1	0.00308437	1	0.0480662	1	1	0.0227542
AI597479	0.0197587	1	0.00255798	1	0.0058214	1	0.00920054	1	1	0.00933466
AI606181	0.00388021	1	0.00183008	1	-0.000470848	1	-0.00301028	1	1	0.00055729
AI661453	0.0597714	1	0.00510504	1	0.00778626	1	-0.0213198	1	1	0.0128357
AI837181	0.0430866	1	-0.0756916	1	0.0603129	1	-0.0952654	1	1	-0.0168894
AI987944	-0.0182499	1	0.0203774	1	-0.00916457	1	0.0305313	1	1	0.00587356
Aida	-0.0288533	1	0.14506	1	0.104818	1	0.0609268	1	1	0.0704879
Aif1l	-0.0182608	1	-0.0406566	1	-0.00128845	1	-0.0294438	1	1	-0.0224124
Aifm1	0.0588189	1	0.144733	1	-0.00477166	1	0.139527	1	1	0.0845768
Aifm2	-0.0170302	1	0.0547025	1	-0.0339764	1	0.00331356	1	1	0.00175237
Aig1	-0.0884061	1	-0.0523476	1	-0.0784117	1	0.0183572	1	1	-0.050202
Aimp1	-0.159914	1	0.0594323	1	-0.134822	0.020226	-0.0579831	1	0.453089	-0.0733219
Aimp2	0.0498942	1	0.0752174	1	0.0487069	1	0.0887088	1	1	0.0656318
Aip	-0.0183799	1	0.147751	1	0.0461279	1	0.196165	1	1	0.092916
Airn	0.00501662	1	0.0909664	1	0.00205686	1	0.00221681	1	1	0.0250642
Ajuba	0.00434401	1	-0.0126619	1	-0.0221065	1	0.0278037	1	1	-0.000655157
Ak1	-0.051473	1	-0.0573896	1	-0.0563069	7.20092e-06	-0.0365872	1	0.00258998	-0.0504392
Ak2	0.0129169	1	0.0357957	1	-0.138058	1	-0.0617407	1	1	-0.0377715
Ak3	0.108699	0.0134629	0.0222732	1	0.0544884	1	0.0168615	1	0.37575	0.0505805
Ak4	-0.0429232	1	-0.0524888	1	-0.00855941	1	-0.0156677	1	1	-0.0299098
Ak6	-0.0236279	1	0.00438234	1	0.0375865	1	-0.0552942	1	1	-0.0092383
Akap1	0.00267467	1	0.0281046	1	0.0217152	1	-0.0126548	1	1	0.00995992
Akap10	-0.0413674	1	-0.032304	1	0.0109239	1	0.0243272	1	1	-0.00960509
Akap11	-0.0671943	1	-0.030828	1	-0.0651105	1	-0.0541806	1	1	-0.0543283
Akap13	0.0673944	1	0.0411517	1	0.0141389	1	0.055345	1	1	0.0445075
Akap2	-0.00401751	1	-0.0832806	1	-0.0011387	1	-0.0495805	1	1	-0.0345043
Akap7	0.0338605	1	0.00266951	1	0.0692224	1	0.0193574	1	1	0.0312775
Akap8	-0.0174487	1	-0.045007	1	0.0185707	1	0.00307193	1	1	-0.0102033
Akap8l	0.0164754	1	0.0115922	1	-0.0716438	1	0.00717773	1	1	-0.00909963
Akap9	0.148125	1	0.0158631	1	0.143118	1	0.157685	1	1	0.116198
Akip1	0.0310314	4.74835e-10	0.0229695	1	0.027638	4.42022e-13	0.0193018	1	4.62268e-18	0.0252352
Akirin1	0.039484	1	0.124332	1	0.0340253	1	-0.0670646	1	1	0.0326942
Akirin2	-0.0610337	1	-0.0536059	1	0.0291694	1	0.00650548	1	1	-0.0197412
Akr1a1	-0.0681995	1	-0.0759911	1	-0.0169917	1	-0.0362821	1	1	-0.0493661
Akr1b10	0.000781913	1	0.14076	1	0.00786536	1	0.0275371	1	1	0.0442361
Akr1b3	-0.00107395	1	-0.0226497	1	-0.0382098	1	0.0422261	1	1	-0.00492685
Akr1b8	0.0848919	1	0.0781516	1	0.0349199	1	0.0812859	1	1	0.0698123
Akr1e1	0.00190583	1	0.0243991	1	0.00923843	1	-0.0641359	1	1	-0.00714812
Akr7a5	0.00540069	1	-0.0500819	1	-0.00151133	1	-0.00310789	1	1	-0.0123251
Akt1	-0.0902471	1	-0.213929	1	-0.120197	1	-0.0466218	1	1	-0.117749
Akt1s1	0.0170191	1	0.0578948	1	0.0954633	1	0.131138	1	1	0.0753787
Akt2	-0.0385241	1	-0.0365026	1	0.00738878	1	0.112036	1	1	0.0110994
Akt3	-0.0396097	1	0.0232968	1	0.0375175	1	0.0652385	1	1	0.0216108
Aktip	0.127637	1	0.0596421	1	0.108067	0.000992462	0.0853653	1	0.0862878	0.0951778
AL590144.2	0.0156365	1	0.00676481	1	-0.00139574	1	-0.0122609	1	1	0.00218617
Alad	0.10565	1	0.00730578	1	0.0407335	1	0.070466	1	1	0.0560389
Alas1	-0.0253465	1	0.00172122	1	-0.00277022	1	0.0288964	1	1	0.000625229
Alcam	0.149382	1	0.108041	1	-0.00613735	1	0.206276	1	1	0.11439
Aldh16a1	0.00366562	1	-0.0195373	1	0.0296962	1	0.045695	1	1	0.0148799
Aldh18a1	0.015868	1	0.135867	1	0.0273599	1	0.00730095	1	1	0.0465991
Aldh2	-0.0412341	1	-0.181199	1	-0.0601546	1	0.0345767	1	1	-0.0620029
Aldh3a2	-0.00626376	1	0.012996	1	0.0194715	1	0.00735633	1	1	0.00839002
Aldh3b1	0.00499658	1	0.0297401	1	-0.0166487	1	0.0240582	1	1	0.0105366
Aldh5a1	0.00549136	1	0.000125922	1	0.0181657	1	0.0193545	1	1	0.0107844
Aldh7a1	0.0138611	1	0.0160467	1	0.00401021	1	0.00575499	1	1	0.00991826
Aldh9a1	-0.00955148	1	0.0246129	1	0.0189612	1	0.0121253	1	1	0.011537
Aldoa	-0.253193	1	-0.0288123	1	-0.0829009	1	-0.127026	1	1	-0.122983
Aldoc	-0.125004	1	0.180221	1	-0.119809	1	-0.03753	1	1	-0.0255305
Alg1	0.02543	1	0.00626052	1	0.00355616	1	-0.00129302	1	1	0.00848841
Alg10b	0.0181007	1	0.131027	1	0.00173643	1	-0.0129846	1	1	0.0344699
Alg11	0.0183636	1	0.104882	1	0.0288641	1	0.0233408	1	1	0.0438627
Alg12	-0.000638912	1	-0.00135109	1	0.000332868	1	-0.00164534	1	1	-0.000825619
Alg13	0.00563176	1	-0.00452595	1	-0.00818923	1	0.00430763	1	1	-0.000693949
Alg14	-0.0240824	1	0.131119	1	0.0306184	1	-0.10697	1	1	0.0076713
Alg2	0.0157782	1	-0.0271598	1	0.0122373	1	0.00524193	1	1	0.0015244
Alg3	-0.00625033	1	0.0105868	1	-0.000877879	1	0.00752183	1	1	0.00274511
Alg5	-0.0360195	1	0.0256218	1	-0.0658262	1	0.0770683	1	1	0.000211111
Alg6	-0.0149285	1	-0.00235605	1	0.00644397	1	-0.000846671	1	1	-0.00292181
Alg8	0.0185066	1	0.0745831	1	0.0120835	1	-0.00532211	1	1	0.0249628
Alg9	-0.00580782	1	0.0468941	1	-0.00130706	1	-0.000141388	1	1	0.00990947
Alkbh1	0.0607713	1	0.142634	1	0.0122174	1	-0.0774148	1	1	0.034552
Alkbh2	0.00934091	1	-0.0459031	1	0.0276612	1	0.000595568	1	1	-0.00207636
Alkbh3	-0.0401497	1	-0.0286321	1	0.00351519	1	-0.0217979	1	1	-0.0217661
Alkbh4	-0.00715882	1	0.00216486	1	0.00767835	1	-0.00348849	1	1	-0.000201024
Alkbh5	-0.0946503	1	-0.194337	1	-0.0595161	1	0.0590201	1	1	-0.0723708
Alkbh6	-0.0153936	1	-0.0807746	1	-0.0267478	1	-0.11681	1	1	-0.0599315
Alkbh7	-0.0430581	1	-0.0112491	1	-0.0149119	1	-0.00360072	1	1	-0.0182049
Alkbh8	0.0160199	1	-0.0564388	1	0.0100639	1	0.0454531	1	1	0.00377454
Alms1	0.0195577	1	0.00271521	1	0.0310879	1	-0.0118751	1	1	0.0103714
Alpk1	-0.0154757	1	-0.00853715	1	-0.0077387	1	-0.0197526	1	1	-0.012876
Als2	-0.0137374	1	0.0167676	1	-0.00246282	1	0.00147609	1	1	0.000510872
Als2cl	0.00183101	1	0.0628379	1	-0.0130858	1	0.0829712	1	1	0.0336386
Alyref	0.0604005	1	0.0188799	1	0.0752215	1	-0.029519	1	1	0.0312457
Alyref2	0.00766346	1	-0.00160657	1	0.0133357	1	-0.00585382	1	1	0.00338468
Amacr	-0.00718894	1	0.0572366	1	-0.0113784	1	-0.00690942	1	1	0.00793997
Ambra1	0.0257122	1	-0.0315794	1	-0.00632417	1	0.0248045	1	1	0.00315329
Amd1	0.130601	1	0.163536	1	0.0322437	1	-0.0406442	1	1	0.0714342
Amd2	0.0343191	1	-0.0264786	1	0.0137352	1	-0.0105367	1	1	0.00275976
Amer1	0.07657	1	0.0443023	1	0.0155576	1	0.0572366	1	1	0.0484166
Amfr	0.0951761	1	-0.133859	1	0.0188341	1	0.0884338	1	1	0.0171463
Amigo2	-0.0142893	1	-0.0533497	1	-0.0320478	1	-0.0680445	1	1	-0.0419328
Ammecr1	-0.0118683	1	-0.000485327	1	0.0214313	1	-0.00831544	1	1	0.00019056
Ammecr1l	0.0230841	1	-0.0327123	1	-0.00441309	1	-0.0281131	1	1	-0.0105386
Amn1	-0.00460907	1	-0.0202207	1	0.0296927	1	0.0287953	1	1	0.00841456
Amot	-0.00773867	1	-0.006421	1	-0.00363451	1	0.0222917	1	1	0.00112438
Amotl1	0.0296224	1	0.0382523	1	0.0530788	1	0.0252539	1	1	0.0365519
Amotl2	-0.0818757	1	-0.0646217	1	0.00996845	1	-0.0120192	1	1	-0.037137
Ampd2	0.00925621	1	0.116951	1	-0.00258256	1	-0.0167357	1	1	0.0267222
Ampd3	-0.00529991	1	0.0808552	1	0.0155534	1	0.0406791	1	1	0.032947
Amz2	-0.0100322	1	-0.0457608	1	0.0110493	1	0.136118	1	1	0.0228435
Anapc1	0.0175345	1	-0.0159149	1	-0.000311643	1	0.0710336	1	1	0.0180854
Anapc10	0.0332699	1	0.103476	1	0.0337215	1	-0.04573	1	1	0.0311843
Anapc11	0.0815956	1	0.0644662	1	0.0717229	1	0.0299082	1	1	0.0619232
Anapc13	-0.00688766	1	0.0125081	1	0.0724931	1	0.0426105	1	1	0.030181
Anapc15	0.0331019	1	-0.00532929	1	0.0408768	1	0.00271458	1	1	0.017841
Anapc16	-0.0195475	1	0.0338817	1	0.0179286	1	0.0517291	1	1	0.020998
Anapc2	0.0696116	1	0.060196	1	0.0349996	1	0.0533854	1	1	0.0545481
Anapc4	0.00768334	1	-0.0806758	1	0.00728694	1	0.0337978	1	1	-0.00797692
Anapc5	0.108253	1	-0.063454	1	-0.0222383	1	0.0765193	1	1	0.02477
Anapc7	0.00534099	1	0.0125959	1	0.0169309	1	0.00205815	1	1	0.00923147
Angel2	0.0619281	1	0.000959268	1	0.0632644	1	0.112084	1	1	0.0595589
Angpt2	0.0264017	1	0.0159898	1	0.00580519	1	-0.00463516	1	1	0.0108904
Angptl2	-0.0673805	1	0.122131	1	-0.0803887	1	-0.0156553	1	1	-0.0103234
Angptl4	-0.0814724	1	-0.195078	1	-0.0764018	1	-0.0712446	1	1	-0.106049
Ank	-0.331621	0.188788	-0.31215	1	-0.417176	3.8752e-10	-0.203715	1	1.76704e-07	-0.316165
Ank3	0.124842	1	-0.0213091	1	0.102766	1	0.0486859	1	1	0.0637462
Ankfy1	0.0875152	1	-0.0477114	1	0.0706027	1	0.0289372	1	1	0.0348359
Ankhd1	0.0446742	1	0.104221	1	0.045813	1	0.0404936	1	1	0.0588004
Ankib1	-0.00975763	1	0.138915	1	0.038442	1	0.00348647	1	1	0.0427714
Ankle2	0.0164991	1	-0.0599822	1	-0.00903232	1	0.0757688	1	1	0.00581336
Ankmy1	-0.0121497	1	-0.051647	1	-0.0188501	1	0.0081177	1	1	-0.0186323
Ankmy2	-0.0220136	1	-0.0529286	1	-0.0314299	1	-0.00349665	1	1	-0.0274672
Ankra2	0.00760959	1	0.063708	1	0.0272492	1	0.0084102	1	1	0.0267443
Ankrd1	-0.060086	1	0.184848	1	0.0566923	1	0.144219	1	1	0.0814182
Ankrd10	0.0838441	1	0.0291151	1	0.0992685	1	0.0539807	1	1	0.0665521
Ankrd11	0.168563	1	0.0715127	1	0.0775485	1	0.0823981	1	1	0.100005
Ankrd12	-0.0549042	1	-0.00117279	1	0.146637	1	-0.0564688	1	1	0.0085228
Ankrd13a	-0.0112738	1	-0.0105906	1	0.0221087	1	0.0211697	1	1	0.00535347
Ankrd13b	-0.0196759	1	0.0173233	1	0.0160223	1	0.0201468	1	1	0.00845414
Ankrd13c	0.0057284	1	-0.0786608	1	-0.0632068	1	0.0260499	1	1	-0.0275223
Ankrd13d	0.0121048	1	0.00402254	1	0.0123481	1	0.0195393	1	1	0.0120037
Ankrd16	0.0202352	1	-0.0313586	1	0.00594777	1	-0.00390367	1	1	-0.00226985
Ankrd17	0.113656	1	-0.0594329	1	0.0421144	1	0.0690522	1	1	0.0413474
Ankrd24	0.00612097	1	-0.0219538	1	-0.00538682	1	0.00443595	1	1	-0.00419594
Ankrd26	0.0288703	1	0.0593653	1	0.0341256	1	-0.0372886	1	1	0.0212681
Ankrd27	0.0242566	1	-0.041607	1	-0.00621524	1	0.00534919	1	1	-0.00455411
Ankrd28	-0.0913378	1	-0.0783891	1	-0.055774	1	-0.0550206	1	1	-0.0701304
Ankrd33b	-0.0839514	1	-0.0574378	1	-0.0575529	0.773003	-0.0746882	1	0.999851	-0.0684076
Ankrd37	-0.120107	1	0.0273255	1	0.170463	1	0.0727492	1	1	0.0376077
Ankrd39	-0.00121565	1	0.00796101	1	-0.0103875	1	0.020153	1	1	0.00412772
Ankrd40	0.047024	1	-0.0799947	1	0.0104757	1	0.060169	1	1	0.00941851
Ankrd42	0.0102692	1	-0.0151133	1	0.00809094	1	-0.00273006	1	1	0.000129195
Ankrd44	-0.0324667	1	-0.0230288	1	-0.0205294	1	-0.015277	1	1	-0.0228255
Ankrd46	-0.015252	1	-0.035761	1	-0.0237552	1	0.0110128	1	1	-0.0159388
Ankrd49	0.056121	1	-0.0198412	1	0.0219453	1	0.0408637	1	1	0.0247722
Ankrd50	-0.0287486	1	-0.039353	1	-0.0398247	1	-0.0241335	1	1	-0.0330149
Ankrd52	-0.014601	1	-0.0181351	1	0.023114	1	0.013778	1	1	0.00103894
Ankrd54	-0.04061	1	0.16681	1	-0.00710748	1	0.029559	1	1	0.037163
Ankrd9	-0.0321987	1	-0.0427174	1	-0.0824545	1	-0.0376875	1	1	-0.0487646
Anks1	0.0208037	1	-0.00423288	1	0.00562615	1	0.0172318	1	1	0.0098572
Anks3	-0.0079342	1	0.116965	1	0.00379553	1	0.0316311	1	1	0.0361144
Ankzf1	-0.0204149	1	-0.0103974	1	0.00331834	1	0.0222091	1	1	-0.00132123
Anln	-0.22086	1	-0.0850579	1	0.053185	1	-0.0222916	1	1	-0.0687562
Ano1	0.0821417	1	-0.0818603	1	-0.0336233	1	-0.0199837	1	1	-0.0133314
Ano10	0.0206158	1	0.0875264	1	0.0243976	1	0.0255799	1	1	0.0395299
Ano4	0.0443142	1	0.0318843	1	-0.00170153	1	0.115055	1	1	0.047388
Ano6	-0.0756379	1	-0.0657599	1	-0.0644372	1	-0.069915	1	1	-0.0689375
Ano8	0.0292728	1	-0.0123411	1	-0.00475428	1	0.0278391	1	1	0.0100041
Anp32a	-0.0436849	1	0.188683	1	-0.0156642	1	0.176039	1	1	0.076343
Anp32b	-0.0830538	1	-0.176292	1	0.0228175	1	0.0194993	1	1	-0.0542573
Anp32e	-0.16656	1	-0.128996	1	-0.12277	1	-0.0687917	1	1	-0.12178
Antxr2	-0.180546	1	-0.116016	1	-0.163817	0.720843	-0.0845352	1	0.999631	-0.136228
Anxa1	0.0817082	1	0.0582165	1	0.129753	1	0.136813	1	1	0.101623
Anxa11	-0.131676	1	-0.217608	1	-0.0791851	1	-0.0120524	1	1	-0.110131
Anxa2	-0.186315	1	-0.115832	1	-0.16088	1	-0.012009	1	1	-0.118759
Anxa3	0.0222475	1	-0.0246995	1	0.0847458	1	0.0926573	1	1	0.0437378
Anxa4	0.0637048	1	0.110377	1	0.0670329	1	0.130416	1	1	0.0928829
Anxa5	-0.297547	0.0749536	-0.251676	1	-0.262839	2.35457e-07	-0.302398	0.187577	4.80663e-06	-0.278615
Anxa6	0.0487962	1	0.0304089	1	0.115854	1	0.040346	1	1	0.0588513
Anxa7	-0.123623	1	-0.115203	1	-0.11317	0.0402975	-0.00386013	1	0.599968	-0.0889643
Anxa8	-0.186455	0.0715125	-0.177849	1	-0.0876594	1	-0.0208726	1	0.727736	-0.118209
Anxa9	0.00457937	1	-0.0165462	1	-0.00489083	1	-0.00288945	1	1	-0.00493678
Aox1	-0.0275541	1	-0.0450692	1	-0.0180985	1	-0.0211873	1	1	-0.0279773
Ap1ar	0.0105349	1	0.170464	1	0.000993364	1	-0.0385732	1	1	0.0358549
Ap1b1	0.0340769	1	0.0366199	1	-0.00709851	1	0.00660246	1	1	0.0175502
Ap1g1	0.0914276	1	-0.00855049	1	0.0132572	1	0.00549405	1	1	0.0254071
Ap1g2	-0.00878578	1	0.00569299	1	0.00958998	1	-0.0106136	1	1	-0.0010291
Ap1m1	-0.0100945	1	0.0179287	1	0.0332076	1	0.2073	1	1	0.0620854
Ap1m2	0.042666	1.18285e-08	0.159659	0.10031	0.0466851	3.84049e-09	0.0374963	0.0775414	4.85084e-15	0.0716266
Ap1s1	0.0635126	1	0.00311511	1	0.0241586	1	0.125918	1	1	0.0541762
Ap1s2	-0.0170732	1	-0.0399967	1	-0.0174379	1	-0.0369597	1	1	-0.0278669
Ap1s3	0.00701956	1	0.00476884	1	0.00288369	1	-0.0202891	1	1	-0.00140426
Ap2a1	0.049678	1	0.0208685	1	0.0293294	1	0.116041	1	1	0.0539792
Ap2a2	-0.0531371	1	-0.111806	1	-0.0145327	1	-0.015801	1	1	-0.0488191
Ap2b1	-0.00907488	1	0.0808551	1	0.0689932	1	0.136288	1	1	0.0692653
Ap2m1	-0.00648647	1	0.108154	1	0.00381713	1	-0.0190338	1	1	0.0216127
Ap2s1	0.104003	1	0.0314747	1	0.0391743	1	0.0569319	1	1	0.0578961
Ap3b1	-0.0239936	1	-0.0731162	1	0.0235256	1	-0.00904575	1	1	-0.0206575
Ap3d1	0.00851422	1	0.0163338	1	0.0320706	1	0.0231313	1	1	0.0200125
Ap3m1	-0.0299792	1	-0.0349459	1	-0.0157684	1	-0.00271842	1	1	-0.020853
Ap3m2	-0.00109312	1	0.15223	1	0.0151707	1	0.0137147	1	1	0.0450057
Ap3s1	-0.0104304	1	0.126119	1	-0.0165054	1	0.0170467	1	1	0.0290575
Ap3s2	0.00865138	1	-0.0435861	1	-0.0240323	1	0.0846096	1	1	0.00641067
Ap4b1	-0.0162854	1	-0.0235804	1	-0.000307136	1	-0.00557934	1	1	-0.0114381
Ap4e1	-0.00887984	1	0.00189337	1	0.0118987	1	0.0225453	1	1	0.0068644
Ap4m1	0.0707327	1	-0.0544867	1	0.0382801	1	0.0160799	1	1	0.0176515
Ap4s1	0.018265	1	-0.119275	1	0.0357971	1	-0.00882384	1	1	-0.0185093
Ap5m1	-0.0240372	1	-0.027852	1	-0.00503386	1	-0.0158372	1	1	-0.0181901
Ap5s1	-0.00930509	1	-0.00969175	1	0.00633424	1	0.00329487	1	1	-0.00234193
Ap5z1	0.00657637	1	0.0118254	1	0.0147403	1	0.0394449	1	1	0.0181467
Apaf1	-0.0160993	1	-0.0136897	1	0.0122074	1	0.0147908	1	1	-0.000697687
Apba3	-0.0165856	1	0.0613207	1	-0.0161582	1	-0.0179054	1	1	0.00266785
Apbb1	0.0112243	1	0.0376061	1	0.0363842	1	-0.0347142	1	1	0.0126251
Apbb1ip	-0.13579	1	-0.185123	1	-0.213201	5.48788e-05	-0.16737	1	0.0118701	-0.175371
Apbb2	0.0202607	1	0.133409	1	-0.0629271	1	-0.0936077	1	1	-0.000716216
Apc	-0.0130184	1	-0.0105905	1	0.0910264	0.785552	-0.0499877	1	0.999883	0.00435748
Apeh	0.000786054	1	0.290396	1	0.0390228	1	-0.056559	1	1	0.0684114
Apex1	-0.120826	1	-0.124279	1	-0.151591	0.285123	-0.0702271	1	0.961279	-0.116731
Apex2	-0.0138551	1	0.0127697	1	-0.00596255	1	-0.00300073	1	1	-0.00251218
Aph1a	-0.0360302	1	-0.045843	1	-0.0103937	1	0.0359206	1	1	-0.0140866
Aph1b	0.029182	1	-0.00373405	1	-0.00202934	1	0.0156195	1	1	0.00975952
Api5	0.0549458	1	-0.0180355	1	0.00828218	1	-0.0982649	1	1	-0.0132681
Apip	0.00445828	1	0.0256885	1	0.0537431	1	0.0712684	1	1	0.0387896
Aplf	0.0251282	1	-0.0405139	1	-0.0101358	1	9.84748e-05	1	1	-0.00635573
Apln	-0.0342455	1	0.0534465	1	0.0358841	1	0.0147927	1	1	0.0174695
Aplp2	-0.0211225	1	-0.0628303	1	-0.00946756	1	0.0449637	1	1	-0.0121141
Apmap	-0.00260045	1	-0.0132024	1	-0.00577187	1	-0.00465341	1	1	-0.00655704
Apobec3	-0.0116743	1	-0.0522604	1	0.0404523	1	0.0293643	1	1	0.00147049
Apobr	0.0738927	1	0.0109986	1	0.0798757	1	0.0970685	1	1	0.0654589
Apoe	-0.0506267	1	0.290571	1	0.00276448	1	0.188938	1	1	0.107912
Apol10b	0.0300362	1	0.0541081	1	0.0408589	1	-0.0054764	1	1	0.0298817
Apol6	-0.00299972	1	0.029852	1	0.00531431	1	-0.00940715	1	1	0.00568986
Apol7a	0.00450982	1	-0.00306734	1	0.0180075	1	0.0129483	1	1	0.00809957
Apol8	-0.00590056	1	-0.0115612	1	0.000231466	1	-0.00497448	1	1	-0.0055512
Apol9a	-0.127012	1	-0.0759876	1	0.00752746	1	0.119876	1	1	-0.0188991
Apol9b	-0.212435	1	-0.0564163	1	-0.0636441	1	-0.0333941	1	1	-0.0914724
Apoo	0.0522851	1	0.285089	1	0.0672343	1	0.0276895	1	1	0.108074
Apool	0.0517064	1	0.0290082	1	0.0936216	0.264145	0.0624232	1	0.953722	0.0591898
Apopt1	-0.0782498	1	-0.101161	1	-0.102242	1	-0.0769472	1	1	-0.0896501
App	0.0412106	1	-0.0178629	1	0.0168983	1	0.0613386	1	1	0.0253961
Appbp2	0.0230583	1	-0.0050208	1	0.0113233	1	-0.00702159	1	1	0.0055848
Appl1	-0.0532454	1	-0.122634	1	-0.0436259	1	-0.0522297	1	1	-0.0679338
Appl2	-0.0289071	1	0.0880419	1	0.0272075	1	0.0127623	1	1	0.0247761
Aprt	0.184661	1	0.262888	1	0.0172175	1	0.1439	1	1	0.152167
Aptx	0.0158052	1	-0.0423878	1	0.0266896	1	0.0345751	1	1	0.00867053
Aqp11	-0.00368544	1	0.00406399	1	0.00519486	1	0.0123446	1	1	0.0044795
Aqp3	-0.020924	1	-0.00791393	1	-0.00362802	1	-0.00226084	1	1	-0.00868171
Aqr	0.0732962	1	0.102948	1	0.0143872	1	-0.0209578	1	1	0.0424185
Araf	0.0260367	1	-0.0691893	1	-0.00232685	1	-0.00841023	1	1	-0.0134724
Arap1	0.00255377	1	0.00325661	1	0.00411371	1	0.00285281	1	1	0.00319422
Arap2	0.129019	1	0.0867035	1	0.134284	0.0662089	0.0785836	1	0.710796	0.107147
Arcn1	-0.103286	1	-0.0313686	1	0.0310465	1	0.0982414	1	1	-0.00134167
Areg	-0.327276	1	-0.688617	1	-0.46927	0.0027541	-0.465022	1	0.160854	-0.487546
Arel1	7.06482e-05	1	0.000225802	1	0.0314151	1	0.00304851	1	1	0.00869002
Arf1	0.0871447	1	-0.0569758	1	0.0674149	1	0.0074359	1	1	0.0262549
Arf2	-0.0327803	1	-0.0721371	1	0.0306383	1	-0.0262897	1	1	-0.0251422
Arf3	-0.0536592	1	-0.106464	1	-0.0900229	1	-0.143009	1	1	-0.0982886
Arf4	-0.241138	0.00340201	-0.337911	0.17437	-0.22373	2.17449e-08	-0.290754	0.051401	2.71669e-09	-0.273383
Arf5	0.195579	0.282733	0.167436	1	0.0739457	1	0.139098	1	0.960484	0.144015
Arf6	0.0010511	1	-0.0784167	1	-0.0450183	1	-0.0260332	1	1	-0.0371043
Arfgap1	-0.00814588	1	0.133564	1	0.0152581	1	-0.0194009	1	1	0.0303189
Arfgap2	0.0358516	1	0.155461	1	0.0249153	1	0.110519	1	1	0.0816867
Arfgap3	-0.0514853	1	-0.066621	1	-0.0216996	1	-0.0404933	1	1	-0.0450748
Arfgef1	0.0868293	1	0.0364501	1	0.0211364	1	0.0787086	1	1	0.0557811
Arfgef2	0.00429418	1	-0.0171663	1	0.00324286	1	0.0900027	1	1	0.0200933
Arfip1	-0.0830411	1	-0.0350814	1	-0.0600471	1	-0.0555443	1	1	-0.0584285
Arfip2	-0.0114922	1	-0.0128416	1	-0.00605245	1	0.110965	1	1	0.0201446
Arfrp1	0.0148171	1	-0.115208	1	-0.0068673	1	0.0574382	1	1	-0.012455
Arg2	-0.000165098	1	0.0471334	1	-0.0142405	1	0.00906554	1	1	0.0104483
Arglu1	0.117565	1	0.0183506	1	0.110472	1	0.212339	1	1	0.114682
Arhgap1	-0.0231898	1	-0.0134858	1	0.00842127	1	0.00143667	1	1	-0.00670442
Arhgap10	0.156973	0.0476471	0.0055672	1	0.0753758	1	0.0389376	1	0.63739	0.0692134
Arhgap11a	-0.0612272	1	-0.0439247	1	-0.0083648	1	0.0386467	1	1	-0.0187175
Arhgap12	0.0156039	1	0.00995872	1	0.0101639	1	0.0594935	1	1	0.023805
Arhgap17	0.03106	1	0.026702	1	0.0628805	1	0.0091446	1	1	0.0324468
Arhgap18	-0.0257745	1	-0.0268444	1	0.064799	1	-0.035349	1	1	-0.00579223
Arhgap19	-0.0330999	1	0.0879019	1	0.0152982	1	-0.0240996	1	1	0.0115002
Arhgap21	-0.102213	1	-0.131141	1	-0.123909	0.388037	-0.0497015	1	0.98411	-0.101741
Arhgap22	-0.186897	1	0.0171767	1	-0.172056	0.0628556	-0.0178733	1	0.699289	-0.0899125
Arhgap23	-0.010248	1	0.164213	1	-0.00662366	1	0.0119521	1	1	0.0398233
Arhgap26	0.118712	0.131132	-0.0164333	1	0.0196505	1	0.104436	1	0.851386	0.0565913
Arhgap27	0.00379238	1	-0.0199904	1	-3.80998e-05	1	0.0113468	1	1	-0.00122233
Arhgap27os1	0.0125077	1	-0.0553734	1	0.00627526	1	0.00734114	1	1	-0.00731232
Arhgap28	-0.0323477	1	-0.00896007	1	0.00562118	1	-0.0306658	1	1	-0.0165881
Arhgap29	-0.0525529	1	-0.00388355	1	-0.107884	1	-0.0846255	1	1	-0.0622366
Arhgap31	-0.0225472	1	-0.0259704	1	-0.0461307	1	-0.0126478	1	1	-0.026824
Arhgap32	0.013848	1	-0.0379974	1	0.0191608	1	-0.0870047	1	1	-0.0229983
Arhgap35	0.0332611	1	-0.0262324	1	0.0652537	1	0.00230748	1	1	0.0186475
Arhgap39	-0.0189618	1	-0.0184639	1	-0.00381107	1	0.00551474	1	1	-0.00893049
Arhgap42	-0.0831992	1	-0.0048601	1	-0.110082	1	-0.0823677	1	1	-0.0701274
Arhgap45	0.00278574	1	0.229322	1	0.00760149	1	-0.0436381	1	1	0.0490179
Arhgap5	0.0554805	1	0.000846946	1	-0.00120985	1	-0.0110793	1	1	0.0110096
Arhgap6	0.0192833	1	-0.0673433	1	0.00655493	1	-0.000249732	1	1	-0.0104387
Arhgap8	-0.0308537	1	-0.0779838	1	-0.021571	1	0.0218189	1	1	-0.0271474
Arhgdia	-0.00662601	1	0.28017	1	0.0157	1	0.0502068	1	1	0.0848626
Arhgdib	-0.0772469	1	-0.0095388	1	-0.0574701	1	0.0271322	1	1	-0.0292809
Arhgdig	0.00389183	1	-0.0268644	1	0.0159009	1	-0.047402	1	1	-0.0136184
Arhgef1	0.041163	1	0.0351376	1	0.117451	0.0109632	0.0895198	1	0.340072	0.0708178
Arhgef10l	0.0124802	1	0.0498854	1	-0.0130209	1	-0.0233308	1	1	0.00650349
Arhgef11	-0.0343352	1	-0.0150514	1	-0.0035459	1	0.0880927	1	1	0.00879006
Arhgef12	0.0321962	1	-0.0308722	1	-0.00968524	1	0.0888774	1	1	0.020129
Arhgef15	0.0104623	1	0.00725059	1	0.00483859	1	0.0135455	1	1	0.00902424
Arhgef16	0.0115297	1	0.0538352	1	0.032062	1	0.0171848	1	1	0.028653
Arhgef17	0.0583967	1	0.0155934	1	0.00585952	1	0.00558256	1	1	0.021358
Arhgef18	0.0135286	1	0.0937167	1	0.0204296	1	0.0112799	1	1	0.0347387
Arhgef19	0.00232638	1	-0.0126819	1	0.000603763	1	0.000874295	1	1	-0.00221936
Arhgef2	-0.0711463	1	-0.151999	1	0.0217025	1	-0.0389791	1	1	-0.0601054
Arhgef25	-0.0379764	1	-0.132363	1	0.0281598	1	0.001328	1	1	-0.0352129
Arhgef28	-0.0293836	1	0.063777	1	0.0088295	1	-0.0204091	1	1	0.00570347
Arhgef3	-0.0356401	1	-0.0405842	1	-0.0143716	1	-0.0181554	1	1	-0.0271878
Arhgef40	-0.0857661	1	-0.0689145	1	-0.110322	1	0.0837646	1	1	-0.0453095
Arhgef5	0.0636707	1	0.097599	1	0.041327	1	0.0639561	1	1	0.0666382
Arhgef7	-0.0555992	1	-0.0231979	1	-0.0463947	1	-0.0355956	1	1	-0.0401968
Arid1a	-0.0177136	1	0.0362837	1	-0.0112864	1	-0.0432253	1	1	-0.00898542
Arid1b	-0.0165999	1	0.0711083	1	-0.0206511	1	0.037243	1	1	0.0177751
Arid2	-0.00854801	1	-0.0315104	1	-0.0298498	1	-0.0421171	1	1	-0.0280063
Arid4a	-0.0847952	1	-0.0601578	1	-0.0409197	1	-0.0266167	1	1	-0.0531224
Arid4b	0.0614871	1	-0.190083	1	0.0674708	1	0.0414912	1	1	-0.00490856
Arid5a	-0.0734526	1	-0.21413	1	-0.0194472	1	0.000988286	1	1	-0.0765104
Arid5b	0.0439055	1	-0.0298076	1	-0.0375696	1	-0.0212944	1	1	-0.0111915
Arih1	-0.0863817	1	-0.00644799	1	-0.00223735	1	0.00314622	1	1	-0.0229802
Arih2	-0.0444463	1	0.0436405	1	0.0125471	1	-0.0111831	1	1	0.000139555
Arl1	0.0200526	1	0.0450811	1	0.044772	1	0.0626963	1	1	0.0431505
Arl10	-0.00588804	1	-0.0143192	1	0.00338046	1	-0.00590976	1	1	-0.00568414
Arl13b	0.102937	1	-0.17435	1	-0.0103226	1	0.0109674	1	1	-0.0176921
Arl14ep	0.00434175	1	0.135076	1	0.0288688	1	0.113526	1	1	0.0704533
Arl15	0.00355472	1	-0.00369574	1	-0.00432818	1	-0.00518906	1	1	-0.00241457
Arl16	-0.00107629	1	-0.0157587	1	-0.0126069	1	-0.0137303	1	1	-0.010793
Arl2	-0.0376497	1	0.080064	1	0.00271075	1	0.0852342	1	1	0.0325898
Arl2bp	0.107579	1	0.055622	1	0.00674855	1	0.0964247	1	1	0.0665935
Arl3	0.105339	1	0.00661698	1	0.0920457	1	-0.0617914	1	1	0.0355525
Arl4a	-0.110154	1	-0.151203	1	-0.176201	3.24313e-06	-0.21906	1	0.00139458	-0.164154
Arl4c	-0.0300471	1	-0.0112217	1	0.00264878	1	0.0189789	1	1	-0.00491029
Arl5a	-0.040324	1	0.0651237	1	0.0056776	1	0.0302605	1	1	0.0151844
Arl5b	-0.0579619	1	-0.118474	1	-0.0419953	1	-0.0807935	1	1	-0.0748061
Arl6	0.0423996	1	-0.00519353	1	0.0283282	1	0.0860702	1	1	0.0379011
Arl6ip1	-0.193125	1	0.0174894	1	0.127263	1	0.0788827	1	1	0.0076277
Arl6ip4	0.00221076	1	0.00173324	1	-0.0310636	1	-0.0392211	1	1	-0.0165852
Arl6ip5	-0.255925	0.025571	-0.273125	1	-0.185952	0.000148225	-0.131315	1	0.00157522	-0.211579
Arl6ip6	0.0770684	1	0.0595013	1	0.058544	1	0.00995891	1	1	0.0512682
Arl8a	0.00944007	1	0.0866989	1	0.0328152	1	0.0417078	1	1	0.0426655
Arl8b	-0.0124545	1	0.0304303	1	-0.033476	1	0.0697704	1	1	0.0135676
Armc1	-0.0284074	1	0.0419614	1	-0.052473	1	-0.0998001	1	1	-0.0346798
Armc10	0.0601183	1	0.0104075	1	0.0726205	0.132202	0.0578475	1	0.852872	0.0502484
Armc3	-0.0188883	1	-0.0415767	1	0.0143861	1	0.00186051	1	1	-0.0110546
Armc5	0.0299911	1	-0.0115928	1	0.0211885	1	-0.00872936	1	1	0.00771437
Armc6	0.068122	1	0.139251	1	0.0181974	1	0.0235524	1	1	0.0622807
Armc8	-0.00270425	1	-0.0122027	1	0.0176473	1	0.0211741	1	1	0.0059786
Armc9	-0.0107586	1	-0.0206633	1	0.0167356	1	-0.044146	1	1	-0.0147081
Armcx5	-0.0268882	1	0.0135182	1	-0.024976	1	-0.0125928	1	1	-0.0127347
Armt1	-0.0250405	1	0.25034	1	0.0340462	1	0.0256725	1	1	0.0712546
Arnt	0.0275391	1	0.224636	1	-0.0207092	1	-0.0248632	1	1	0.0516506
Arntl	-8.64947e-05	1	-0.0344209	1	0.00286306	1	-0.00605273	1	1	-0.00942427
Arntl2	0.101854	1	0.215698	1	0.0915696	1	0.0698806	1	1	0.119751
Arpc1a	0.0566258	1	-0.147704	1	0.0199294	1	0.123285	1	1	0.013034
Arpc1b	0.101452	1	0.0558351	1	-0.0513618	1	0.0957015	1	1	0.0504067
Arpc2	-0.167569	1	-0.00698183	1	-0.0342111	1	-0.0374788	1	1	-0.0615603
Arpc3	0.117267	1	0.136021	1	0.0781869	1	0.0915558	1	1	0.105758
Arpc4	0.0501152	1	0.0597349	1	0.0611246	1	0.206646	1	1	0.0944051
Arpc5	0.0423908	1	0.0190398	1	0.0573164	1	0.145163	1	1	0.0659774
Arpc5l	0.136752	1	0.0278948	1	0.111284	0.560759	0.0320253	1	0.997049	0.076989
Arpin	0.0912725	1	-0.0679796	1	0.0247903	1	0.00924826	1	1	0.0143329
Arpp19	0.0344766	1	0.147154	1	0.157167	0.000214479	0.184263	1	0.0312255	0.130765
Arrb2	-0.00672802	1	0.0741833	1	0.00735194	1	0.00281342	1	1	0.0194052
Arrdc1	0.036715	1	-0.0608127	1	0.011726	1	0.00325671	1	1	-0.00227875
Arrdc2	-0.0132708	1	0.00804557	1	0.026726	1	0.00216339	1	1	0.00591604
Arrdc3	0.000213375	1	0.0643599	1	0.0208408	1	0.0461956	1	1	0.0329024
Arrdc4	0.0936423	0.000939011	0.114766	1	0.135647	7.56289e-14	0.0679112	1	6.60308e-13	0.102991
Arsa	-0.0501825	1	0.0895702	1	-0.0274591	1	0.0215117	1	1	0.00836008
Arsb	0.0170417	1	-0.0266458	1	0.0053065	1	-0.0107239	1	1	-0.00375538
Arsk	0.00569893	1	0.00596419	1	0.0014729	1	-0.0159813	1	1	-0.000711322
Artn	-0.018171	1	-0.0234562	1	-0.00314418	1	-0.0199207	1	1	-0.016173
Arv1	0.0152889	1	-0.01644	1	0.0183992	1	0.0477154	1	1	0.0162409
Arvcf	0.0666608	1	-0.00124033	1	0.021356	1	0.0213456	1	1	0.0270305
As3mt	-0.026527	1	-0.0289634	1	-0.0115103	1	0.0567422	1	1	-0.00256461
Asah1	0.0728746	1	0.211523	1	0.0181997	1	0.0955797	1	1	0.0995441
Asah2	0.0255438	1	-0.00582355	1	0.00562502	1	-9.32411e-05	1	1	0.00631301
Asap1	0.0116909	1	-0.217611	1	-0.0829231	1	-0.148315	1	1	-0.10929
Asap2	0.0717283	1	-0.00988973	1	-0.059803	1	0.0270405	1	1	0.00726902
Asap3	0.0147801	1	0.00794858	1	0.0260406	1	0.0120608	1	1	0.0152075
Asb13	0.0116616	1	0.0207144	1	0.0423459	1	0.0439655	1	1	0.0296718
Asb3	-0.0467776	1	0.136735	1	0.0109251	1	-0.0149268	1	1	0.0214889
Asb6	0.00756911	1	0.132443	1	0.0296289	1	0.0147936	1	1	0.0461085
Asb7	0.00899603	1	-0.0116469	1	0.000585991	1	0.0260408	1	1	0.00599398
Asb8	-0.00967022	1	0.0146779	1	0.0140062	1	0.0158742	1	1	0.00872202
Ascc1	0.030374	1	0.0998714	1	0.0594153	1	0.0666802	1	1	0.0640852
Ascc2	-0.00361576	1	0.00154244	1	0.00447291	1	0.0729387	1	1	0.0188346
Ascc3	-0.0017361	1	-0.0289479	1	0.0778901	1	0.226153	1	1	0.0683398
Asf1a	0.125242	1	0.0126206	1	0.0254008	1	0.0292526	1	1	0.048129
Asf1b	-0.0352973	1	0.192893	1	0.0192635	1	-0.0289848	1	1	0.0369686
Ash1l	-0.0356416	1	-0.13268	1	-0.0454053	1	-0.0199656	1	1	-0.0584231
Ash2l	0.0929865	1	0.0696352	1	-0.00957139	1	0.186069	1	1	0.0847799
Asl	-0.060667	1	0.0158515	1	-0.0660783	1	-0.0620694	1	1	-0.0432408
Asna1	0.065326	1	-0.0244771	1	0.0317379	1	0.091185	1	1	0.040943
Asns	-0.0809166	1	-0.0724829	1	-0.0122197	1	0.0135587	1	1	-0.0380151
Asnsd1	-0.0566901	1	0.00347587	1	0.0077609	1	-0.00359277	1	1	-0.0122615
Asph	-0.00417127	1	0.0197891	1	-0.0207039	1	-0.0200943	1	1	-0.0062951
Aspm	-0.182471	1	-0.00313208	1	0.0412324	1	0.0021174	1	1	-0.0355634
Aspscr1	0.00603348	1	0.0345408	1	-0.00836727	1	0.0700586	1	1	0.0255664
Asrgl1	-0.0280966	1	-0.0402365	1	0.0120514	1	0.0740425	1	1	0.0044402
Ass1	-0.107412	1	-0.058604	1	-0.0577843	1	0.0473408	1	1	-0.0441148
Aste1	0.00841884	1	0.0856935	1	0.0163326	1	0.0143006	1	1	0.0311864
Asxl1	-0.0189132	1	-0.0347279	1	-0.000594932	1	-0.0225711	1	1	-0.0192018
Asxl2	-0.0201832	1	0.00148474	1	-0.010505	1	0.0111958	1	1	-0.00450192
Atad1	0.0981263	1	0.0574205	1	0.124751	0.000727103	0.0230845	1	0.0706985	0.0758455
Atad2	0.0547927	1	-0.014202	1	0.123907	1	-0.065518	1	1	0.0247448
Atad2b	-0.0594298	1	0.0506821	1	-0.00687346	1	0.0699966	1	1	0.0135939
Atad3a	0.0388091	1	-0.0411916	1	0.0260974	1	0.00358903	1	1	0.00682597
Atad5	0.0595897	1	-0.0213756	1	0.0435566	1	-0.0256919	1	1	0.0140197
Atat1	-0.0197043	1	0.0238356	1	-0.00900263	1	-0.0206437	1	1	-0.00637876
Ate1	-0.0166891	1	0.00193912	1	0.0173907	1	0.0926779	1	1	0.0238297
Atf1	-0.0600533	1	-0.0421088	1	-0.0295916	1	0.0246743	1	1	-0.0267698
Atf2	-0.0177138	1	-0.0822253	1	-0.011631	1	-0.0317082	1	1	-0.0358196
Atf3	0.306257	1	0.0684527	1	0.175426	1	0.343065	1	1	0.2233
Atf4	-0.0840446	1	-0.219577	1	-0.0574997	1	-0.0848989	1	1	-0.111505
Atf5	0.0229904	1	0.046778	1	0.0647041	1	-0.0247173	1	1	0.0274388
Atf6	-0.0263356	1	-0.0364468	1	-0.0119679	1	0.0294439	1	1	-0.0113266
Atf6b	0.0181604	1	0.210402	1	0.049388	1	0.0519998	1	1	0.0824875
Atf7	0.00146264	1	0.0103061	1	0.0133706	1	0.00699523	1	1	0.00803366
Atf7ip	-0.0455175	1	-0.0196747	1	0.0398573	1	0.0513393	1	1	0.00650111
Atg10	0.0230442	1	0.0625111	1	0.027124	1	0.0190572	1	1	0.0329341
Atg101	-0.0964318	1	-0.144909	1	-0.048351	1	-0.000770456	1	1	-0.0726155
Atg12	-0.00459344	1	0.0465768	1	0.0511317	1	0.121404	1	1	0.0536298
Atg13	-0.00506282	1	0.00636153	1	0.0108644	1	0.0310616	1	1	0.0108062
Atg14	-0.00772971	1	0.0246416	1	-0.0281453	1	0.0310259	1	1	0.00494811
Atg16l1	-0.0229636	1	0.0624303	1	0.0304858	1	-0.0106712	1	1	0.0148203
Atg16l2	0.00411609	1	-0.0233417	1	0.021293	1	0.0667932	1	1	0.0172151
Atg2a	-0.00669486	1	0.00419033	1	0.0354442	1	0.0536953	1	1	0.0216587
Atg2b	-0.0673718	1	-0.0520372	1	-0.0155785	1	-0.0246189	1	1	-0.0399016
Atg3	-0.0267092	1	0.265311	1	-0.029208	1	-0.0195967	1	1	0.0474493
Atg4a	0.00653204	1	-0.0139263	1	-0.0168495	1	0.00742102	1	1	-0.00420571
Atg4b	-0.0250731	1	0.207813	1	0.0143494	1	-0.00207982	1	1	0.0487524
Atg4c	0.00886136	1	-0.00655414	1	-0.00685758	1	-0.00343818	1	1	-0.00199714
Atg4d	0.0578089	1	0.0365353	1	0.0181521	1	0.00706429	1	1	0.0298902
Atg5	-0.000255375	1	0.0898334	1	0.0219741	1	0.0819722	1	1	0.0483811
Atg7	0.0349646	1	0.0111999	1	-0.00205557	1	-0.00423291	1	1	0.009969
Atg9a	-0.0012283	1	-0.0401682	1	-0.00881448	1	-0.0113172	1	1	-0.015382
Atg9b	0.0255037	1	0.113401	1	0.083507	0.00185539	0.0885746	1	0.127167	0.0777465
Atic	0.00400359	1	0.140469	1	0.0718459	1	0.0300428	1	1	0.0615903
Atl1	0.0270961	1	0.00089511	1	0.00147501	1	-0.00818481	1	1	0.00532035
Atl2	0.00328996	1	-0.0368846	1	-0.00976588	1	-0.0491892	1	1	-0.0231374
Atl3	0.021713	1	0.111796	1	0.0270764	1	-0.073262	1	1	0.0218309
Atm	0.0471333	1	0.0228487	1	0.0341919	1	0.021528	1	1	0.0314255
Atmin	0.025198	1	-0.0226795	1	0.0125223	1	0.0303013	1	1	0.0113355
Atn1	-0.0726146	1	0.0771104	1	-0.0310975	1	0.0108939	1	1	-0.00392693
Atox1	0.110318	1	-0.028905	1	0.118222	1	0.11219	1	1	0.0779561
Atp10a	0.028158	1	0.00728172	1	0.0121998	1	-0.000712387	1	1	0.0117318
Atp11a	0.138152	1	0.10895	1	0.0610143	1	0.0506016	1	1	0.0896794
Atp11b	0.0201529	1	-0.141275	1	-0.0259598	1	0.0165453	1	1	-0.032634
Atp11c	0.0159726	1	-0.0314022	1	0.0201156	1	0.0117431	1	1	0.00410726
Atp13a1	0.0870906	1	0.0834394	1	0.00396177	1	0.0297442	1	1	0.051059
Atp13a2	0.00493717	1	-0.00597577	1	-0.00248381	1	-0.00596698	1	1	-0.00237235
Atp13a3	-0.0263167	1	-0.0622883	1	0.0643752	1	0.137278	1	1	0.028262
Atp1a1	0.112537	1	0.0900097	1	0.184667	1	0.37921	1	1	0.191606
Atp1b1	-0.0421939	1	-0.0261964	1	-0.0176729	1	-0.039124	1	1	-0.0312968
Atp1b3	0.0722695	1	-0.0604478	1	0.0063111	1	-0.0658155	1	1	-0.0119207
Atp23	-0.006033	1	0.181794	1	-0.00330458	1	0.0478893	1	1	0.0550863
Atp2a2	0.0275118	1	-0.0763482	1	0.00803179	1	-0.0468709	1	1	-0.0219189
Atp2b1	-0.0875678	1	-0.12688	1	-0.165584	0.785318	-0.250254	1	0.999883	-0.157571
Atp2c1	-0.0108668	1	0.0384955	1	0.0164576	1	0.00624344	1	1	0.0125825
Atp2c2	-0.0205379	1	0.0183117	1	-0.0182894	1	0.0501875	1	1	0.00741796
Atp5a1	0.139819	1	0.0626047	1	0.0474079	1	0.182462	1	1	0.108074
Atp5b	0.0297092	1	0.0358116	1	0.0160238	1	0.0598039	1	1	0.0353371
Atp5c1	-0.2006	0.0149791	0.0916771	1	-0.267894	2.05475e-15	-0.205679	1	3.05362e-13	-0.145624
Atp5d	0.0584401	1	-0.0316217	1	-0.0349063	1	0.055334	1	1	0.0118115
Atp5e	-0.155311	1	0.0186007	1	-0.0495546	1	-0.164234	1	1	-0.0876248
Atp5f1	-0.188471	1	-0.255679	1	-0.188747	2.94405e-06	-0.198861	1	0.0012928	-0.20794
Atp5g1	-0.0885342	1	-0.0104462	1	-0.0503841	1	-0.0645651	1	1	-0.0534824
Atp5g2	-0.294965	3.31623e-05	-0.372684	0.147262	-0.323872	2.0888e-21	-0.207469	1	3.8332e-22	-0.299747
Atp5g3	-0.00808233	1	0.0447386	1	-0.0192448	1	-0.000803153	1	1	0.00415207
Atp5h	-0.0412032	1	0.169755	1	-0.0297458	1	0.0140752	1	1	0.0282203
Atp5j	0.0276756	1	0.200079	1	-0.0864134	1	0.0129637	1	1	0.0385761
Atp5j2	-0.127944	1	0.033499	1	-0.0581944	1	-0.0933816	1	1	-0.0615052
Atp5k	-0.1469	1	-0.0335168	1	0.00421417	1	0.0228686	1	1	-0.0383334
Atp5l	-0.14619	1	-0.00139872	1	-0.0455915	1	-0.035823	1	1	-0.0572508
Atp5o.1	0.00325106	1	-0.00162523	1	-0.0570529	1	-0.00898838	1	1	-0.0161039
Atp5s	0.00343168	1	-0.0159599	1	0.00272614	1	0.0304342	1	1	0.00515802
Atp6ap1	-0.042054	1	-0.0052087	1	-0.0379709	1	0.0371213	1	1	-0.0120281
Atp6ap2	-0.0793687	1	0.227917	1	-0.0432162	1	-0.0432731	1	1	0.0155148
Atp6v0a1	0.0323438	1	0.0200475	1	0.0118055	1	0.0482441	1	1	0.0281102
Atp6v0a2	0.0354172	1	0.0158305	1	-0.00621811	1	0.00748524	1	1	0.0131287
Atp6v0b	-0.062287	1	-0.106363	1	-0.0218479	1	0.0619924	1	1	-0.0321263
Atp6v0c	-0.0127238	1	0.0028333	1	-0.00815448	1	-0.0555597	1	1	-0.0184012
Atp6v0d1	-0.0145921	1	0.12734	1	-0.0568398	1	0.107832	1	1	0.0409351
Atp6v0e	0.0988058	1	0.187299	1	0.00603406	1	0.0873691	1	1	0.0948771
Atp6v1a	-0.0884155	1	0.00138228	1	-0.0313117	1	-0.0412658	1	1	-0.0399027
Atp6v1b2	-0.0226838	1	-0.0134179	1	0.0135196	1	0.0595464	1	1	0.00924106
Atp6v1c1	-0.107151	1	-0.095088	1	-0.0875565	0.195936	-0.139934	1	0.917002	-0.107432
Atp6v1d	-0.104626	1	-0.0617985	1	-0.0217289	1	0.0840471	1	1	-0.0260267
Atp6v1e1	-0.00664067	1	-0.280722	1	-0.0522922	1	0.0314004	1	1	-0.0770637
Atp6v1f	-0.00562043	1	-0.103609	1	0.0360974	1	0.0571571	1	1	-0.00399364
Atp6v1g1	-0.0716371	1	0.109054	1	-0.0213395	1	-0.00322269	1	1	0.00321361
Atp6v1h	-0.0713299	1	0.097476	1	0.0365494	1	0.0475587	1	1	0.0275635
Atp7a	0.0412264	1	0.031525	1	0.00657896	1	0.00517038	1	1	0.0211252
Atp8a1	0.0274122	1	0.016577	1	0.0144111	1	0.034412	1	1	0.0232031
Atp8b2	-0.0617759	1	-0.0829635	1	-0.0443201	1	-0.0305841	1	1	-0.0549109
Atp9a	0.00515013	1	-0.0300546	1	-0.0162593	1	-0.0236485	1	1	-0.016203
Atp9b	-0.0258271	1	-0.0170314	1	0.0133424	1	0.0246063	1	1	-0.00122743
Atpaf1	0.0321993	1	-0.00401677	1	0.00359117	1	0.0258532	1	1	0.0144067
Atpaf2	0.0145505	1	-0.0771935	1	0.0317293	1	0.00485657	1	1	-0.00651429
Atpif1	-0.00286979	1	0.0204068	1	0.00543845	1	-0.0201106	1	1	0.000716233
Atr	-0.00225467	1	-0.0355837	1	0.0252754	1	0.0145592	1	1	0.00049905
Atraid	-0.00153452	1	0.0122577	1	-0.0329972	1	0.0567382	1	1	0.00861605
Atrip	0.0158499	1	-0.0247505	1	-0.0111234	1	0.00112509	1	1	-0.00472473
Atrn	0.0244711	1	0.00604133	1	0.0650481	1	0.0189352	1	1	0.0286239
Atrnl1	0.0543269	1	0.0305515	1	0.0388105	1	0.00352622	1	1	0.0318038
Atrx	0.0506928	1	0.0486179	1	0.0600566	1	0.108663	1	1	0.0670075
Atxn1	-0.0305522	1	-0.0950915	1	-0.00021448	1	-0.0184565	1	1	-0.0360787
Atxn10	-0.18852	0.348905	-0.203297	1	-0.0975848	1	-0.00381636	1	0.977592	-0.123304
Atxn1l	0.00759176	1	0.0522547	1	-0.00297169	1	0.0415542	1	1	0.0246073
Atxn2	0.0215954	1	-0.0499515	1	0.0197032	1	0.0801244	1	1	0.0178679
Atxn2l	0.00262385	1	0.044671	1	0.126178	0.649794	0.067805	1	0.998978	0.0603195
Atxn3	-0.020148	1	-0.133826	1	-0.0121902	1	-0.0385087	1	1	-0.0511681
Atxn7	-0.0213505	1	0.0109378	1	-0.0359039	1	-0.0268409	1	1	-0.0182894
Atxn7l1	0.0256461	1	-0.00282474	1	-0.0325754	1	-0.0121695	1	1	-0.00548089
Atxn7l2	-0.0077609	1	-0.035784	1	0.00743857	1	-0.00836227	1	1	-0.0111172
Atxn7l3	0.0112961	1	-0.112848	1	0.0284278	1	-0.0242559	1	1	-0.024345
Atxn7l3b	0.161318	1	0.191176	1	0.022641	1	0.0728128	1	1	0.111987
AU019823	0.0244213	1	-0.0351434	1	0.00460153	1	-0.04678	1	1	-0.0132252
AU020206	-0.0241454	1	0.09519	1	0.00791914	1	-0.00565394	1	1	0.0183275
AU022252	0.0446289	1	-0.0112292	1	-0.0259795	1	-0.00763275	1	1	-5.31345e-05
AU040320	0.0094021	1	-0.0523511	1	0.0156523	1	-0.00219815	1	1	-0.00737371
AU041133	0.0508465	1	0.0313335	1	0.0102537	1	0.0127475	1	1	0.0262953
Auh	-0.0092215	1	0.096504	1	-0.00171746	1	-0.0210303	1	1	0.0161337
Aunip	-0.0162447	1	-0.0120307	1	-0.00612221	1	-0.0206253	1	1	-0.0137557
Aup1	0.0512877	1	0.129203	1	-0.000635428	1	0.0685919	1	1	0.0621118
Aurka	-0.131716	1	0.0382167	1	0.0467161	1	-0.0521296	1	1	-0.0247283
Aurkaip1	-0.0101078	1	0.0436589	1	-0.0317375	1	-0.0556996	1	1	-0.0134715
Aurkb	-0.07311	1	-0.0581266	1	0.0171372	1	-0.0382283	1	1	-0.0380819
Aven	0.014867	1	0.0898553	1	-0.0103664	1	-1.12551e-05	1	1	0.0235862
Avl9	0.0445277	1	0.00684866	1	0.00899013	1	-0.0356241	1	1	0.00618558
Avpi1	0.0492154	1	-0.0230854	1	0.0206579	1	-0.121454	1	1	-0.0186666
AW112010	0.170016	1	0.25915	1	0.291544	0.00413736	0.184801	1	0.203097	0.226378
AW209491	0.0199366	1	0.0441466	1	0.0229121	1	0.00603974	1	1	0.0232587
AW549877	-0.00372372	1	-0.0226767	1	-0.00236373	1	0.0480539	1	1	0.00482243
AW554918	-0.00646917	1	-0.0193423	1	0.0244172	1	-0.00258045	1	1	-0.000993676
Axin1	0.0360589	1	-0.0113739	1	-0.0208095	1	0.00161262	1	1	0.001372
Axl	0.020184	1	-0.0207169	1	0.098715	1	0.0691395	1	1	0.0418304
AY036118	0.0650356	1	0.471409	1	-0.051549	1	0.138857	1	1	0.155938
Azi2	0.0478373	1	-0.0688804	1	0.0517926	1	0.0226559	1	1	0.0133514
Azin1	-0.215989	1	-0.256252	1	-0.148893	0.00973992	-0.196134	1	0.320594	-0.204317
Azin2	-0.0262476	1	-0.0352195	1	-0.0985448	1	0.0246146	1	1	-0.0338493
B230118H07Rik	0.0139051	1	-0.0350993	1	-0.0475331	1	0.0319806	1	1	-0.00918669
B230208H11Rik	-0.015203	1	0.00743601	1	0.0163413	1	0.00567507	1	1	0.00356236
B230219D22Rik	-0.0433669	1	-0.0115009	1	0.0497165	1	-0.0810322	1	1	-0.0215459
B230307C23Rik	0.000788853	1	0.204874	1	0.0255023	1	0.0173522	1	1	0.0621294
B230354K17Rik	-0.00365922	1	0.0070548	1	-0.00695316	1	-0.00997571	1	1	-0.00338332
B230369F24Rik	-0.00379202	1	0.0199281	1	0.0263799	1	0.0207165	1	1	0.0158081
B2m	0.157102	1	0.166934	1	0.171215	0.168344	0.111602	1	0.894206	0.151713
B3galnt2	0.0319806	1	0.00241735	1	0.0168696	1	0.0224545	1	1	0.0184305
B3galt4	-0.0141563	1	-0.00510785	1	-5.24759e-05	1	0.0760462	1	1	0.0141824
B3galt6	0.019845	1	0.00210832	1	0.0233596	1	0.0766727	1	1	0.0304964
B3gat3	0.08004	1	0.085259	1	0.113404	0.144267	0.0997196	1	0.868468	0.0946056
B3glct	0.0541317	1	-0.0159962	1	0.0369531	1	0.0280302	1	1	0.0257797
B3gnt2	0.0169735	1	-0.0498388	1	-0.00762988	1	0.0442831	1	1	0.000946972
B3gnt3	0.0201232	1	0.128513	1	0.0432394	1	0.0131602	1	1	0.0512589
B4galnt1	0.0160469	1	0.144323	1	0.0728516	0.806536	0.12528	1	0.999925	0.0896253
B4galnt4	0.112592	0.569826	-0.00069307	1	0.0179593	1	0.0123349	1	0.99733	0.0355484
B4galt1	-0.0804289	1	0.0709038	1	-0.0494121	1	0.0131754	1	1	-0.0114405
B4galt2	-0.0104507	1	-0.0250812	1	0.0163311	1	-0.0504327	1	1	-0.0174084
B4galt3	-0.0172641	1	0.0090471	1	0.106943	0.0896678	-0.00920065	1	0.776286	0.0223813
B4galt4	0.079052	1	0.0591729	1	0.000561006	1	-0.00482998	1	1	0.033489
B4galt5	-0.0109745	1	-0.0140153	1	-0.0865439	0.449953	-0.0761962	1	0.990973	-0.0469325
B4galt6	0.0081866	1	-0.0127514	1	0.0112765	1	-0.000100169	1	1	0.0016529
B4galt7	-0.0215138	1	0.017549	1	-0.00390462	1	0.0105645	1	1	0.000673766
B4gat1	-0.0422971	1	0.0321891	1	0.00974982	1	-0.0174937	1	1	-0.00446298
B630019K06Rik	0.0268554	1	0.0108062	1	-0.00419253	1	0.0120722	1	1	0.0113853
B930036N10Rik	0.0123605	1	-0.0566871	1	0.00796017	1	-0.00645074	1	1	-0.0107043
B9d1	0.0425208	1	-0.0316483	1	0.0207255	1	0.0501291	1	1	0.0204317
B9d2	0.013559	1	0.0101556	1	-0.00103923	1	0.0278412	1	1	0.0126291
Babam1	0.0791707	1	0.0857445	1	0.0386495	1	0.0482002	1	1	0.0629412
Babam2	-0.0348972	1	-0.0400863	1	0.0203681	1	-0.0900136	1	1	-0.0361572
Bace1	-0.00881351	1	0.0663088	1	0.0132913	1	0.141351	1	1	0.0530345
Bach1	0.0121147	1	-0.0831152	1	0.0599564	1	0.0268331	1	1	0.00394725
Bad	0.0380284	1	0.134698	1	0.0223677	1	0.0121385	1	1	0.0518081
Bag1	0.0449783	1	-0.0802261	1	-0.0331086	1	-0.065342	1	1	-0.0334246
Bag2	0.00295956	1	-0.0408207	1	-0.0153753	1	-0.0271381	1	1	-0.0200937
Bag3	-0.0534183	1	-0.0914424	1	0.0200414	1	-0.0560979	1	1	-0.0452293
Bag4	0.0166094	1	0.0459573	1	0.0169323	1	0.060981	1	1	0.03512
Bag5	-0.0523136	1	-0.0525352	1	-0.109285	0.0224104	-0.084066	1	0.473847	-0.0745499
Bag6	0.0097011	1	0.00682436	1	0.00462134	1	-0.0136279	1	1	0.00187973
Bahd1	-0.00670045	1	0.00844911	1	0.00768783	1	0.00212193	1	1	0.0028896
Baiap2	0.0678499	1	-0.0213064	1	-0.030435	1	0.00468881	1	1	0.00519934
Baiap2l1	-0.0354769	1	-0.0375078	1	-0.0334441	1	-0.017116	1	1	-0.0308862
Bak1	0.0183033	1	0.044645	1	0.0548854	1	0.000952049	1	1	0.0296965
Banf1	0.139287	1	0.0331906	1	0.249099	0.00381951	0.1179	1	0.194152	0.134869
Banp	0.0134015	1	-0.0846851	1	-0.0247723	1	-0.0387069	1	1	-0.0336907
Bap1	-0.0237101	1	-0.0427703	1	-0.0194754	1	0.104158	1	1	0.00455059
Bard1	-0.00910865	1	0.0201735	1	0.0307124	1	-0.0186831	1	1	0.00577356
Basp1	0.198804	1	-0.121958	1	-0.0980698	1	-0.161944	1	1	-0.0457917
Batf2	-0.00540639	1	-0.0298331	1	-0.0161085	1	-0.0073485	1	1	-0.0146741
Batf3	0.0545737	1	0.0347025	1	0.0133023	1	-0.0393226	1	1	0.015814
Bax	0.00281616	1	0.0848827	1	0.0642258	1	0.0322482	1	1	0.0460432
Baz1a	0.0796837	1	0.24719	1	0.0193111	1	-0.130966	1	1	0.0538047
Baz1b	0.0506742	1	0.119033	1	0.0734723	1	0.127641	1	1	0.092705
Baz2a	0.0444616	1	-0.0425501	1	0.0416979	1	-0.0401797	1	1	0.000857439
Baz2b	0.0197733	1	-0.0115288	1	0.0427609	1	0.114782	1	1	0.0414469
Bbc3	0.0838458	1	-0.130365	1	0.062678	1	0.0871491	1	1	0.0258269
Bbip1	-0.0117538	1	0.187566	1	0.131938	0.0141061	0.0196854	1	0.38418	0.0818591
Bbs12	-0.00393423	1	0.0070171	1	-0.00666349	1	0.0145537	1	1	0.00274326
Bbs2	0.00781363	1	0.00347258	1	0.0059763	1	0.0431307	1	1	0.0150983
Bbs4	-0.0203352	1	0.0315528	1	-0.0136573	1	0.0180649	1	1	0.00390631
Bbs5	0.00698081	1	0.0355909	1	0.0113189	1	0.00901175	1	1	0.0157256
Bbs7	0.00285579	1	0.00738648	1	0.00150736	1	0.0248211	1	1	0.00914268
Bbs9	-0.00643866	1	0.0133862	1	-0.0131045	1	0.00651857	1	1	9.04101e-05
Bbx	0.0178674	1	0.446501	1	0.00907643	1	0.0125808	1	1	0.121506
BC002059	0.0033018	1	0.0597097	1	0.00352135	1	0.00947045	1	1	0.0190008
BC003331	-0.0667042	1	0.00986597	1	0.0168985	1	0.0777574	1	1	0.00945442
BC003965	0.050534	1	0.0390822	1	0.0621484	1	-0.00620261	1	1	0.0363905
BC004004	0.0749179	1	0.116426	1	0.0122759	1	0.120324	1	1	0.0809859
BC005537	0.0236148	1	0.120965	1	0.0596469	1	0.0987972	1	1	0.0757559
BC005561	-0.0328896	1	-0.0132559	1	0.0680828	1	0.0934724	1	1	0.0288524
BC005624	0.0340868	1	-0.0916762	1	-0.0264098	1	-0.00396043	1	1	-0.0219899
BC017158	0.00388909	1	-0.0110082	1	0.011359	1	-0.00398166	1	1	6.45475e-05
BC017643	0.0217831	1	0.220773	1	0.0412516	1	0.00845999	1	1	0.0730668
BC022687	-0.02697	1	0.00684079	1	-0.00680957	1	-0.0149298	1	1	-0.0104671
BC024978	0.0239082	1	0.00649123	1	0.000992793	1	-0.000556303	1	1	0.00770899
BC029722	0.0517749	1	-0.0444849	1	0.0117138	1	0.054635	1	1	0.0184097
BC030867	-0.0219479	1	-0.0265528	1	0.00342153	1	0.000438846	1	1	-0.0111601
BC031181	0.0568864	1	0.0363824	1	0.0661959	1	0.152265	1	1	0.0779325
BC037034	0.0224138	1	0.0394704	1	0.0193124	1	0.002918	1	1	0.0210286
BC052040	0.00609672	1	0.0149229	1	0.0141353	1	-0.0599818	1	1	-0.00620672
BC055324	-0.00827185	1	-0.0161885	1	-1.86704e-05	1	-0.0261961	1	1	-0.0126688
BC100530	-0.0322679	1	-0.0554424	1	0.0100536	1	0.175593	1	1	0.024484
Bcam	-0.0458095	1	-0.0324659	1	-0.020365	1	-0.0302438	1	1	-0.032221
Bcap29	-0.00618017	1	-0.11558	1	-0.0360238	1	-0.0155456	1	1	-0.0433325
Bcap31	-0.00495273	1	-0.00326415	1	-0.0250206	1	-0.046904	1	1	-0.0200354
Bcar1	0.0316232	1	-0.079081	1	0.0749766	1	-0.0362903	1	1	-0.00219287
Bcar3	-0.0495774	1	0.0162404	1	-0.0855842	0.449343	-0.0844308	1	0.990921	-0.050838
Bcas2	-0.047241	1	-0.122693	1	-0.103625	1	-0.188035	1	1	-0.115399
Bcas3	0.00396617	1	0.00934408	1	-0.00504529	1	-0.05012	1	1	-0.0104638
Bcat2	-0.00295696	1	-0.000341453	1	0.0071755	1	0.0128296	1	1	0.00417666
Bccip	0.0351091	1	-0.0262876	1	0.0330037	1	0.0204907	1	1	0.015579
Bcdin3d	-0.00512447	1	-0.000791968	1	0.0144657	1	0.000857238	1	1	0.00235163
Bckdha	-0.0193063	1	-0.037655	1	0.00393673	1	0.0108058	1	1	-0.0105547
Bckdhb	-0.0035996	1	0.0192435	1	-0.00306632	1	0.0170043	1	1	0.00739548
Bckdk	0.0507359	1	0.0636517	1	0.0235137	1	0.0527238	1	1	0.0476563
Bcl10	-0.0855251	1	-0.299321	1	-0.0103712	1	-0.0958379	1	1	-0.122764
Bcl11a	-0.0675299	1	-0.0334985	1	-0.0382262	1	0.0225187	1	1	-0.029184
Bcl2	0.0351704	1	0.00066933	1	0.0171971	1	0.0955555	1	1	0.0371481
Bcl2l1	-0.00843774	1	0.0758346	1	0.0420038	1	0.0248011	1	1	0.0335504
Bcl2l11	0.00896287	1	0.0121106	1	-0.0469615	1	-0.0160704	1	1	-0.0104896
Bcl2l12	0.00697473	1	0.0171179	1	0.0158715	1	-0.0106672	1	1	0.00732422
Bcl2l13	0.0297519	1	-0.00569458	1	0.0189139	1	0.0822739	1	1	0.0313113
Bcl2l2	-0.0281096	1	0.126405	1	-0.00828314	1	-0.0170309	1	1	0.0182454
Bcl3	0.010409	1	-0.0359899	1	-0.0390333	1	-0.0073862	1	1	-0.0180001
Bcl6	-0.0186644	1	-0.0918938	1	0.0267068	1	-0.0474292	1	1	-0.0328202
Bcl7a	-0.0266152	1	-0.0206667	1	0.0139199	1	0.00665909	1	1	-0.00667574
Bcl7b	0.0254523	1	0.165829	1	0.0503762	1	0.0235463	1	1	0.0663009
Bcl7c	0.151698	1	0.23323	1	0.0702383	1	-0.0363134	1	1	0.104713
Bcl9	-0.0217146	1	-0.00217494	1	-0.0060833	1	-0.0376366	1	1	-0.0169024
Bcl9l	0.00125729	1	-0.0985727	1	-0.0186766	1	0.0129414	1	1	-0.0257627
Bclaf1	0.123341	1	-0.00133794	1	0.0802375	1	0.0714483	1	1	0.0684222
Bclaf3	0.0403201	1	0.024705	1	0.0394503	1	0.0254335	1	1	0.0324772
Bcor	0.00915235	1	-0.0197121	1	0.000314765	1	-0.00964776	1	1	-0.00497319
Bcorl1	-0.04475	1	-0.000251069	1	0.0252041	1	-0.028288	1	1	-0.0120212
Bcr	0.0191436	1	-0.0354722	1	-0.0363477	1	0.0265759	1	1	-0.00652514
Bcs1l	-0.0125359	1	-0.015453	1	-0.0181064	1	-0.00543563	1	1	-0.0128827
Bdkrb2	0.0470981	1	0.0109327	1	-0.0240821	1	-0.00479304	1	1	0.00728891
Bdnf	0.0415935	1	-0.118258	1	-0.0941156	1	-0.0518996	1	1	-0.0556699
Bdp1	0.136845	1	0.0493379	1	0.0343189	1	-0.0257106	1	1	0.0486979
Becn1	0.00867797	1	-0.0805244	1	0.0150813	1	0.0402246	1	1	-0.00413513
Bend3	-0.00273433	1	0.00487092	1	0.0129385	1	-0.018534	1	1	-0.000864725
Bend4	-8.9163e-05	1	-0.0437821	1	0.0145665	1	0.0104741	1	1	-0.00470768
Bend5	-0.0631619	1	0.171701	1	0.0415809	1	0.120581	1	1	0.0676751
Bend6	0.00179191	1	0.018365	1	-0.00162311	1	0.0077801	1	1	0.00657846
Bet1	-0.0764524	1	-0.12605	1	-0.080289	1	0.0738711	1	1	-0.0522302
Bet1l	0.0405583	1	-0.0591961	1	0.0270132	1	0.163637	1	1	0.0430032
Bex3	-0.123318	1	-0.148222	1	-0.0789136	1	-0.0883466	1	1	-0.1097
Bfar	-0.0377095	1	0.0463699	1	0.0159391	1	-0.0344935	1	1	-0.0024735
Bgn	0.00581281	1	-0.159301	1	0.0169712	1	-0.0245065	1	1	-0.0402558
Bhlhe40	0.0283894	1	-0.164617	1	-0.106241	1	0.158167	1	1	-0.0210753
Bhlhe41	-0.0269358	1	0.106035	1	0.0200373	1	0.0451284	1	1	0.0360662
Bicd1	-0.00500341	1	0.00781672	1	-0.00578812	1	0.000954289	1	1	-0.00050513
Bicd2	0.0262635	1	-0.0510952	1	-0.0102711	1	-0.00481837	1	1	-0.0099803
Bicra	0.0353696	1	-0.00897905	1	0.00484678	1	-0.0125796	1	1	0.00466443
Bicral	0.00992297	1	-0.026939	1	0.00143362	1	0.0184224	1	1	0.000709996
Bid	0.00493365	1	0.0162959	1	0.0456253	1	-0.04853	1	1	0.00458122
Bik	0.00435875	1	-0.0357043	1	0.0242917	1	-0.00966034	1	1	-0.00417854
Bin1	0.277047	0.00567921	-0.0204499	1	0.0719246	1	0.0333865	1	0.241845	0.0904771
Bin3	-0.0283081	1	-0.0366731	1	-0.0474173	1	-0.0520999	1	1	-0.0411246
Birc2	-0.0157283	1	-0.0172478	1	0.0482288	1	0.0330836	1	1	0.0120841
Birc3	0.00221878	1	-0.0575708	1	-0.0286207	1	0.0426368	1	1	-0.010334
Birc5	-0.295373	1	-0.103728	1	0.0566934	1	-0.14018	1	1	-0.120647
Birc6	0.0756208	1	0.0671142	1	0.0822649	1	0.0386173	1	1	0.0659043
Bivm	-0.023037	1	0.0783918	1	0.013053	1	0.0329636	1	1	0.0253428
Blcap	0.013305	1	-0.0798795	1	-0.00435983	1	0.015913	1	1	-0.0137553
Blm	-0.00135113	1	0.00130341	1	0.0434531	1	0.00225523	1	1	0.0114151
Blmh	-0.0306014	1	0.0633091	1	-0.00152417	1	0.116383	1	1	0.0368917
Bloc1s1	-0.044061	1	0.0593635	1	0.0515366	1	0.0381372	1	1	0.0262441
Bloc1s2	0.113539	1	0.153871	1	0.0785244	1	0.0692087	1	1	0.103786
Bloc1s3	0.0309192	1	0.0666011	1	0.00855791	1	0.0411209	1	1	0.0367998
Bloc1s4	0.0608523	1	0.00463509	1	-0.00125392	1	-0.0284585	1	1	0.00894375
Bloc1s5	-0.0275995	1	-0.00512791	1	0.000424857	1	-0.0275902	1	1	-0.0149732
Bloc1s6	-0.0220009	1	0.157042	1	0.00130478	1	-0.0324444	1	1	0.0259754
Blvra	-0.00599451	1	-0.0981925	1	0.00164325	1	0.0543853	1	1	-0.0120396
Blvrb	-0.0274089	1	-0.0467454	1	-0.0445256	1	-0.0307648	1	1	-0.0373612
Blzf1	-0.0484939	1	0.0136786	1	0.00857681	1	-0.0109009	1	1	-0.00928487
Bmi1	0.0266176	1	-0.10041	1	-0.041491	1	0.0686664	1	1	-0.0116542
Bmp1	-0.0778749	1	0.0234675	1	-0.0768804	1	0.0915643	1	1	-0.00993089
Bmp2k	0.0212355	1	-0.0783732	1	0.0234648	1	-0.0300574	1	1	-0.0159326
Bmp7	-0.164044	4.38585e-05	-0.0572569	1	-0.135752	4.28332e-09	-0.0864043	1	8.74158e-10	-0.110864
Bmpr1a	-0.0109001	1	0.0233111	1	-0.0475674	1	-0.103361	1	1	-0.0346295
Bmpr2	0.0107031	1	0.168121	1	-0.00683281	1	0.0656566	1	1	0.059412
Bms1	0.0105048	1	-0.0284412	1	0.00024777	1	0.0199022	1	1	0.000553383
Bmt2	-0.00997302	1	0.0632947	1	-0.00358475	1	-0.0243905	1	1	0.0063366
Bmyc	-0.00306033	1	0.120647	1	0.00155337	1	0.0562266	1	1	0.0438417
Bnc1	0.00916089	1	-0.0299398	1	-0.0181632	1	-0.0146708	1	1	-0.0134032
Bnip1	0.00793513	1	0.0946381	1	0.0162591	1	-0.0161733	1	1	0.0256647
Bnip2	-0.0544246	1	0.140356	1	-0.0300315	1	-0.0596896	1	1	-0.000947431
Bnip3	-0.418971	1	-0.0866729	1	-0.0380536	1	-0.127747	1	1	-0.167861
Bnip3l	-0.348146	0.478517	-0.349076	1	-0.34094	1.694e-06	-0.163028	1	0.000464654	-0.300297
Bod1	0.0719716	1	-0.0294132	1	-0.00842469	1	0.0332225	1	1	0.0168391
Bod1l	0.105223	1	-0.0265944	1	0.014286	1	0.0296115	1	1	0.0306315
Bok	-0.139169	1	0.0960867	1	-0.0527735	1	0.0330049	1	1	-0.0157126
Bola1	0.0189936	1	0.0762538	1	-0.057903	1	-0.0657626	1	1	-0.00710455
Bola2	0.109352	1	-0.078044	1	0.0887376	1	0.010509	1	1	0.0326386
Bola3	-0.0372126	1	-0.0292861	1	-0.0749995	1	0.0842364	1	1	-0.0143154
Bop1	0.0575015	1	-0.0386075	1	0.0136385	1	-0.00217814	1	1	0.00758858
Bora	-0.0856676	1	-0.0429174	1	-0.0241788	1	-0.0265881	1	1	-0.044838
Borcs5	-0.00384936	1	0.0158329	1	0.0151497	1	0.00397894	1	1	0.00777804
Borcs6	0.00842698	1	-0.0237447	1	0.0160521	1	0.0387258	1	1	0.00986504
Borcs7	0.000715403	1	-0.0156396	1	0.016402	1	0.0458396	1	1	0.0118293
Borcs8	0.17622	1	-0.0300328	1	-0.041366	1	0.042063	1	1	0.0367211
Bpgm	0.000312407	1	-0.0606283	1	-0.000383203	1	0.0876228	1	1	0.00673092
Bphl	-0.000592946	1	0.164758	1	-0.0339478	1	0.0172085	1	1	0.0368565
Bpnt1	-0.00732696	1	0.0175743	1	0.0351393	1	0.0231623	1	1	0.0171372
Bptf	0.109303	1	-0.0329875	1	0.0486526	1	0.0362864	1	1	0.0403137
Braf	-0.0235483	1	-0.0348969	1	0.019978	1	0.0247554	1	1	-0.00342795
Brap	-0.0278015	1	0.00545741	1	-0.00276533	1	-0.0186087	1	1	-0.0109295
Brat1	0.0196177	1	-0.00658824	1	0.0256249	1	0.0149064	1	1	0.0133902
Brca1	0.00981565	1	0.00307507	1	0.0355978	1	0.000890843	1	1	0.0123448
Brca2	0.0521556	1	-0.0164169	1	0.044888	1	0.00748086	1	1	0.0220269
Brcc3	-0.000251022	1	0.0804136	1	0.0178578	1	-0.0320149	1	1	0.0165014
Brd1	-0.104276	1	-0.185222	1	-0.0675215	1	-0.0968092	1	1	-0.113457
Brd2	0.0755364	1	0.00790498	1	-0.0111793	1	-0.0171686	1	1	0.0137734
Brd3	0.0631204	1	-0.0388143	1	0.039577	1	0.0286229	1	1	0.0231265
Brd4	-0.022229	1	0.000768593	1	0.0368149	1	-0.0414451	1	1	-0.00652265
Brd7	0.158936	1	0.195118	1	0.107658	0.493683	0.0514493	1	0.994079	0.12829
Brd8	0.102763	1	0.158533	1	0.0541974	1	0.123801	1	1	0.109823
Brd9	0.00624877	1	0.0997118	1	0.0292083	1	0.0403524	1	1	0.0438803
Brf1	-0.0952165	0.469099	0.188244	1	-0.0607495	1	-0.00547645	1	0.992475	0.00670038
Brf2	0.0495212	1	-0.00756134	1	0.00784364	1	0.00508584	1	1	0.0137223
Bri3	0.0626145	1	-0.00973193	1	0.0456958	1	-0.0779038	1	1	0.00516864
Bri3bp	0.0385062	1	-0.0478193	1	0.0502399	1	0.013999	1	1	0.0137315
Brip1	-0.00302656	1	-0.00156472	1	0.0480863	1	-0.0279775	1	1	0.00387936
Brip1os	0.0455685	1	0.0802158	1	0.0789659	1	0.0422857	1	1	0.061759
Brix1	-0.155339	1	-0.0514782	1	-0.11646	1	-0.0549981	1	1	-0.0945687
Brk1	0.0271046	1	-0.0908354	1	0.0295969	1	0.152208	1	1	0.0295185
Brms1	0.0498652	1	0.0364964	1	0.040027	1	-0.00955951	1	1	0.0292073
Brms1l	0.0432079	1	0.0557801	1	0.0160075	1	0.00910023	1	1	0.0310239
Brox	-0.0247708	1	0.131221	1	0.0628768	1	0.00642644	1	1	0.0439384
Brpf1	0.0220486	1	0.0679547	1	0.0326062	1	-0.0251229	1	1	0.0243716
Brpf3	0.0120293	1	0.00164129	1	0.00245509	1	0.0073902	1	1	0.00587898
Brsk1	0.0210912	1	0.0565941	1	0.018807	1	-0.0411823	1	1	0.0138275
Brwd1	-0.00137345	1	-0.0587611	1	0.029302	1	0.156409	1	1	0.0313941
Brwd3	-0.028265	1	-0.0101976	1	0.00282355	1	0.0348186	1	1	-0.000205115
Bscl2	0.0564708	1	0.00032535	1	0.0293471	1	0.0387567	1	1	0.031225
Bsdc1	0.0222402	1	-0.0246284	1	0.0110758	1	0.0123776	1	1	0.00526631
Bsg	-0.219322	1	-0.139518	1	-0.167107	0.149613	-0.0523104	1	0.874753	-0.144564
Bsn	-0.00861094	1	-0.0111824	1	-0.0022206	1	-0.00428905	1	1	-0.00657576
Bst2	0.49507	0.0289711	0.497651	1	0.555747	3.30231e-17	0.326261	1	1.22532e-14	0.468682
Btaf1	-0.0109003	1	-0.00277701	1	0.0327605	1	0.00891691	1	1	0.00700002
Btbd1	0.0227595	1	-0.0680196	1	-0.0466354	1	-0.0706015	1	1	-0.0406242
Btbd10	0.0196659	1	-0.00744001	1	0.0230734	1	-0.00736679	1	1	0.00698312
Btbd11	-0.0149823	1	-0.0622746	1	-0.00658435	1	-0.0184706	1	1	-0.025578
Btbd19	0.0175316	1	-0.0174573	1	0.0125685	1	0.0195504	1	1	0.00804829
Btbd2	-0.00714419	1	0.118053	1	0.0036807	1	0.00837369	1	1	0.0307409
Btbd3	-0.0201092	1	0.0270287	1	-0.0185034	1	0.00579697	1	1	-0.00144673
Btbd6	-0.0187716	1	0.00543378	1	-0.0269868	1	-0.0903746	1	1	-0.0326748
Btbd7	-0.111409	1	-0.129602	1	-0.118277	0.895131	-0.123295	1	0.999994	-0.120646
Btbd9	-0.0159931	1	-0.0351403	1	0.0384725	1	-0.0309646	1	1	-0.0109064
Btd	-0.0827927	1	-0.0783655	1	-0.0626422	0.289073	-0.0478012	1	0.962558	-0.0679004
Btf3	0.0988124	1	-0.0138054	1	0.0159933	1	-0.062269	1	1	0.00968284
Btf3l4	0.00449329	1	0.0380826	1	0.0166219	1	-0.017972	1	1	0.0103064
Btg1	0.0964134	1	-0.0110253	1	0.0192791	1	0.132386	1	1	0.0592632
Btg2	0.33161	1	-0.210866	1	-0.0911556	1	0.0999942	1	1	0.0323955
Btg3	-0.00886133	1	0.00687292	1	0.0616049	1	0.0235909	1	1	0.0208018
Btrc	0.0270042	1	0.0371813	1	0.00656463	1	0.063094	1	1	0.033461
Bub1	-0.12735	1	-0.0823043	1	0.0137504	1	-0.0118132	1	1	-0.0519294
Bub1b	-0.0701721	1	0.00849936	1	-0.00701192	1	-0.00534428	1	1	-0.0185072
Bub3	-0.0857699	1	0.0810362	1	0.0740773	1	-0.0551668	1	1	0.0035442
Bud13	-0.0142926	1	0.0354463	1	-0.00471714	1	-0.0063897	1	1	0.00251172
Bud23	-0.040061	1	-0.0225136	1	-0.0461497	1	0.00390388	1	1	-0.0262051
Bud31	0.0909973	1	-0.0630279	1	0.0434555	1	0.116373	1	1	0.0469495
Bvht	-0.0364996	1	0.0273086	1	-0.0235596	1	-0.0386021	1	1	-0.0178382
Bysl	0.0241743	1	0.0131763	1	0.0111112	1	0.00737332	1	1	0.0139588
Bzw1	0.00222693	1	-0.0906523	1	0.0148462	1	0.0174667	1	1	-0.0140281
Bzw2	-0.0144294	1	-0.0210824	1	-0.148623	1	-0.127842	1	1	-0.0779942
C030006K11Rik	-0.00279891	1	-0.0153269	1	-0.00856525	1	0.0130348	1	1	-0.00341404
C130071C03Rik	-0.0139071	1	-0.00533299	1	-0.0072747	1	-0.00308219	1	1	-0.00739924
C1d	-0.0737527	1	0.215001	1	-0.0379112	1	-0.0656188	1	1	0.00942942
C1galt1	-0.0839844	1	-0.114467	1	-0.0454272	1	0.00899782	1	1	-0.0587202
C1galt1c1	0.0228432	1	-0.0278999	1	0.0341884	1	0.00353039	1	1	0.00816552
C1qbp	0.0599985	1	0.0777571	1	0.0151825	1	-0.0461072	1	1	0.0267077
C1qtnf1	0.00409012	1	-0.00649179	1	-0.0509066	1	-0.0403171	1	1	-0.0234064
C1qtnf12	-0.114023	0.000719166	-0.130252	0.00208007	-0.105948	2.34564e-15	-0.0599158	0.811208	5.35523e-17	-0.102535
C1qtnf6	-0.0104075	1	-0.0178084	1	-0.0221216	1	0.00355314	1	1	-0.0116961
C1ra	0.0464536	1	-0.000778865	1	0.0154818	1	0.00286519	1	1	0.0160054
C1rb	0.0254212	1	-0.00828951	1	0.0110816	1	-0.0426452	1	1	-0.00360798
C1s1	0.00682747	1	-0.0223956	1	0.015933	1	-0.0128892	1	1	-0.0031311
C230037L18Rik	0.0117886	1	0.104224	1	0.00643439	1	0.00869771	1	1	0.0327862
C2cd2l	0.0210826	1	0.000498542	1	0.0113358	1	-0.0111518	1	1	0.00544128
C2cd3	0.0480702	1	-0.0170111	1	0.0197092	1	-0.0357068	1	1	0.00376538
C2cd5	-0.011157	1	0.0421502	1	0.0054302	1	0.0192031	1	1	0.0139066
C3	-0.100732	1	0.137251	1	-0.110526	1	-0.0424187	1	1	-0.0291063
C330007P06Rik	0.0244533	1	0.0628598	1	-0.00190201	1	0.0130298	1	1	0.0246102
C330018D20Rik	0.00729558	1	0.00479106	1	0.0235346	1	0.0233657	1	1	0.0147467
C330027C09Rik	-0.0416822	1	0.0471758	1	0.0255103	1	-0.00390859	1	1	0.00677385
C430042M11Rik	0.0133419	1	-0.0449234	1	-0.00948317	1	-0.0104396	1	1	-0.0128761
C4b	0.0177654	1	-0.0113167	1	0.0398077	1	0.112337	1	1	0.0396483
C730034F03Rik	0.000790243	1	0.174046	1	-0.0148843	1	-0.0109514	1	1	0.0372502
C77080	0.13647	0.441925	0.0923458	1	0.0236089	1	0.143078	1	0.990268	0.0988757
C87436	0.0378194	1	0.0324251	1	0.011307	1	0.00925462	1	1	0.0227015
CAAA01118383.1	0.0584626	1	-0.0105581	1	0.0094258	1	0.0275994	1	1	0.0212324
CAAA01147332.1	-0.0427791	1	-0.0305002	1	0.0138873	1	-0.0145582	1	1	-0.0184876
Caap1	-0.00109343	1	-0.0638775	1	0.0222255	1	0.0275163	1	1	-0.00380729
Cab39	0.0210197	1	-0.0481437	1	0.0281673	1	-0.0732996	1	1	-0.0180641
Cab39l	-0.0503113	1	-0.0348031	1	-0.0376551	1	0.158681	1	1	0.00897786
Cabin1	0.0302	1	0.042534	1	0.0705965	1	0.00490386	1	1	0.0370586
Cables2	0.0222215	1	-0.0122053	1	-0.00222308	1	0.0182006	1	1	0.00649844
Cacfd1	0.00919733	1	0.0247971	1	0.0112978	1	0.0170318	1	1	0.015581
Cachd1	0.00826574	1	-0.00472444	1	0.018492	1	0.00895986	1	1	0.00774829
Cacna1a	0.0122927	1	0.034695	1	0.0416888	1	-0.00216153	1	1	0.0216287
Cacnb3	-0.0105745	1	-0.0940134	1	-0.0190831	1	-0.0530883	1	1	-0.0441898
Cactin	-0.0140004	1	-0.0419727	1	-0.00666456	1	-0.047096	1	1	-0.0274334
Cacul1	0.0309693	1	-0.0359372	1	0.0612404	1	-0.010893	1	1	0.0113449
Cacybp	0.158729	1	0.107872	1	0.214702	0.00951418	0.154486	1	0.316828	0.158947
Cad	-0.00791513	1	0.0159594	1	0.0332672	1	-0.0247034	1	1	0.00415205
Cadm4	0.0119749	1	0.118302	1	0.0218306	1	0.0167176	1	1	0.0422064
Cadps2	0.000317515	1	0.0056259	1	0.00658448	1	0.00329148	1	1	0.00395484
Calcoco1	-0.0333754	1	-0.0516675	1	0.000430188	1	-0.0208668	1	1	-0.0263699
Cald1	-0.075977	1	-0.0588112	1	-0.0377813	1	0.102781	1	1	-0.0174471
Calm1	-0.410358	0.00120698	-0.138436	1	-0.33509	3.9088e-10	-0.255995	1	2.00165e-09	-0.28497
Calm2	-0.116109	1	0.0470627	1	-0.0128262	1	0.0261137	1	1	-0.0139396
Calm3	0.0110488	1	0.00226481	1	0.061524	1	-0.010647	1	1	0.0160476
Calr	-0.0251786	1	0.115032	1	0.0418062	1	0.0304235	1	1	0.0405208
Calr3	0.0229187	1	0.0594852	1	0.00783091	1	0.00331468	1	1	0.0233874
Calr4	-0.00298492	1	0.00198781	1	0.000668509	1	0.00500351	1	1	0.00116873
Calu	0.0804858	1	-0.039006	1	0.00982659	1	0.151003	1	1	0.0505773
Camk1	0.0330243	1	0.017593	1	-0.0237896	1	0.0620997	1	1	0.0222318
Camk2d	-0.132533	1	-0.0600322	1	-0.258196	5.60693e-10	-0.126763	1	1.043e-06	-0.144381
Camk2g	-0.0636862	1	-0.103764	1	-0.0830435	0.065338	-0.0697818	1	0.70787	-0.0800688
Camk2n1	-0.112075	1	-0.153789	1	-0.037335	1	-0.10445	1	1	-0.101912
Camk2n2	0.0522695	1	-0.0421871	1	0.00265462	1	-0.0261804	1	1	-0.00336084
Camkk2	0.0807196	1	0.0587378	1	0.0670415	1	0.0426194	1	1	0.0622796
Caml	-0.0118747	1	-0.0835396	1	0.0440647	1	0.0798281	1	1	0.00711963
Camsap1	0.0177511	1	-0.0309955	1	0.0342148	1	0.0754603	1	1	0.0241077
Camsap2	-0.0223301	1	-0.0603164	1	-0.00747125	1	-0.0271525	1	1	-0.0293176
Camta1	0.0076773	1	-0.00892858	1	0.0248414	1	-0.0512088	1	1	-0.00690466
Camta2	-0.010915	1	0.0302213	1	-0.00765013	1	-0.0134722	1	1	-0.000453993
Cand1	0.0393976	1	-0.0494584	1	-0.00465005	1	-0.0376963	1	1	-0.0131018
Cand2	0.0185365	1	0.0192882	1	-0.0157708	1	0.01921	1	1	0.010316
Cant1	-0.0195854	1	-0.0415256	1	0.00674308	1	-0.0100268	1	1	-0.0160987
Canx	0.0651087	1	0.00421372	1	0.0566921	1	0.0363435	1	1	0.0405895
Cap1	0.0382254	1	0.0303056	1	0.0238407	1	0.0274844	1	1	0.029964
Capg	-0.0276914	1	-0.00390748	1	-0.115765	1	0.123907	1	1	-0.00586424
Capn1	0.0484751	1	0.037719	1	0.0258468	1	0.164901	1	1	0.0692355
Capn10	0.0416054	1	0.107463	1	-0.0309425	1	0.0269365	1	1	0.0362656
Capn15	0.0110688	1	-0.00710555	1	0.033108	1	-0.00984274	1	1	0.00680712
Capn2	-0.034153	1	0.0106206	1	-0.077372	1	-0.0191708	1	1	-0.0300188
Capn7	-0.0258904	1	-0.0494765	1	-0.0177663	1	-0.0299949	1	1	-0.030782
Capns1	0.0235128	1	-0.090157	1	0.0323387	1	-0.0320276	1	1	-0.0165833
Caprin1	-0.0377246	1	0.216541	1	0.0386407	1	0.0301028	1	1	0.0618901
Caprin2	0.0148169	1	-0.000648797	1	-0.0036302	1	0.0166889	1	1	0.00680669
Capza1	-0.0575361	1	-0.151388	1	-0.0840484	1	-0.111916	1	1	-0.101222
Capza2	0.06067	1	-0.0280219	1	0.0206997	1	0.0157033	1	1	0.0172628
Capzb	-0.0302603	1	0.148425	1	-0.0669325	1	-0.0194176	1	1	0.00795353
Car12	-0.043556	1	0.0175357	1	-0.058784	1	0.0189494	1	1	-0.0164637
Car13	0.00455595	1	-0.0606107	1	-0.0293795	1	0.0443309	1	1	-0.0102759
Car5b	-0.0910859	1	-0.0522597	1	-0.0373832	1	-0.0606911	1	1	-0.060355
Car9	0.0381173	1	0.153361	1	0.0370984	1	0.0404222	1	1	0.0672496
Card10	0.185535	1	0.038488	1	0.08858	1	0.0859076	1	1	0.0996276
Card19	-0.0730434	1	-0.080331	1	-0.0882946	1	-0.0731003	1	1	-0.0786923
Card6	-0.0233774	1	0.0208385	1	-0.0184269	1	0.00183546	1	1	-0.00478256
Carf	0.0117975	1	0.0038242	1	0.00315054	1	0.0108023	1	1	0.00739363
Carhsp1	0.0124261	1	-0.053591	1	0.0448375	1	0.0144319	1	1	0.00452612
Carm1	0.0480783	1	0.00640756	1	0.0221441	1	-1.20222e-05	1	1	0.0191545
Carmil1	0.022685	1	0.0193831	1	0.0201914	1	0.0176337	1	1	0.0199733
Carnmt1	0.0591682	1	-0.0328658	1	0.0809257	1	0.162612	1	1	0.0674601
Cars	-0.0847997	1	-0.0573964	1	0.00651454	1	-0.0236466	1	1	-0.039832
Cars2	0.0121649	1	0.0808577	1	0.044795	1	0.0207063	1	1	0.039631
Casc3	0.0523696	1	-0.0557155	1	0.00355952	1	-0.0315841	1	1	-0.0078426
Casc4	0.105807	1	0.187989	1	0.00272835	1	0.000272696	1	1	0.0741994
Casd1	-0.00809422	1	0.00358789	1	-0.0146258	1	-0.038988	1	1	-0.01453
Cask	0.0528503	1	0.0101549	1	0.0360448	1	-0.0273563	1	1	0.0179234
Caskin2	0.0115883	1	0.040069	1	-0.00634221	1	0.0999621	1	1	0.0363193
Casp1	-0.132074	1	0.0236495	1	-0.0230812	1	0.0169082	1	1	-0.0286493
Casp12	0.0346842	1	0.003024	1	0.0655291	1	-0.0031561	1	1	0.0250203
Casp2	-0.00106404	1	-0.0212785	1	0.00301521	1	0.103168	1	1	0.0209601
Casp3	0.375891	0.0468531	0.192549	1	0.123435	1	0.211527	1	0.633627	0.22585
Casp4	-0.026949	1	0.0482659	1	-0.0248722	1	0.0125901	1	1	0.0022587
Casp6	-0.047428	1	-0.0632582	1	-0.115526	1	-0.0288148	1	1	-0.0637568
Casp7	0.0564098	1	0.0693538	1	0.0518038	1	0.0112008	1	1	0.047192
Casp8	0.0104356	1	0.21784	1	0.0639241	1	0.0327744	1	1	0.0812436
Casp8ap2	0.055314	1	0.023953	1	0.0417691	1	0.0599244	1	1	0.0452401
Casp9	0.0021445	1	-0.00251766	1	-0.00484544	1	0.000886771	1	1	-0.00108296
Cast	-0.0254047	1	0.0265313	1	-0.0212321	1	0.0367409	1	1	0.00415885
Cat	-0.0336278	1	0.0502554	1	-0.0264847	1	-0.0710084	1	1	-0.0202164
Cav1	-0.00217537	1	-0.0237323	1	-0.0259077	1	-0.0410561	1	1	-0.0232179
Cav2	0.0288349	1	0.124685	1	-0.00347088	1	0.0401437	1	1	0.0475481
Cavin1	0.0223633	1	-0.0373834	1	-0.040304	1	-0.00928061	1	1	-0.0161512
Cavin2	-0.096917	1	-0.145644	1	-0.0343127	1	-0.107871	1	1	-0.0961862
Cavin3	0.0253914	1	0.0581021	1	-0.0323033	1	0.0307548	1	1	0.0204862
Cbarp	-0.00221169	1	-0.027697	1	-0.0174714	1	-0.0326884	1	1	-0.0200171
Cbfa2t2	0.0213899	1	-0.0186416	1	0.0148158	1	-0.0188473	1	1	-0.000320818
Cbfb	0.0468076	1	0.0467904	1	0.104453	0.0518831	0.00248935	1	0.65647	0.050135
Cbl	-0.0309181	1	0.0041946	1	-0.0348337	1	0.000610574	1	1	-0.0152367
Cblb	-0.0718615	1	-0.0289054	1	-0.0442524	1	-0.0438727	1	1	-0.047223
Cblc	0.0534246	1	0.0249554	1	0.0715578	1	0.0666771	1	1	0.0541537
Cbll1	-0.0021459	1	-0.0364926	1	0.0154129	1	-0.0138383	1	1	-0.00926597
Cbr1	0.0323683	1	0.173933	1	-0.0193984	1	0.055597	1	1	0.0606249
Cbr2	-0.0401268	1	-0.00882644	1	-0.0393438	1	0.00448433	1	1	-0.0209532
Cbr4	0.0246004	1	0.0305618	1	0.0169939	1	0.0300613	1	1	0.0255543
Cbwd1	-0.0337853	1	-0.013935	1	0.0451603	1	-0.0875712	1	1	-0.0225328
Cbx1	0.0402465	1	-0.125683	1	0.03541	1	-0.0659771	1	1	-0.0290008
Cbx2	-0.00693263	1	-0.00313046	1	0.00346477	1	0.00515578	1	1	-0.000360635
Cbx3	0.00778434	1	-0.100287	1	0.0103267	1	0.0485338	1	1	-0.00841064
Cbx4	-0.0501947	1	-0.0932535	1	-0.0736538	1	-0.0583471	1	1	-0.0688623
Cbx5	-0.0795489	1	-0.0290286	1	-0.000455918	1	0.0163814	1	1	-0.023163
Cbx6	-0.0257129	1	-0.00916005	1	-0.0249989	1	0.0609539	1	1	0.000270516
Cbx7	-0.00660274	1	-0.0104597	1	0.00548681	1	-0.00617175	1	1	-0.00443684
Cbx8	0.000610347	1	-0.0275221	1	-0.0268033	1	-0.00572794	1	1	-0.0148608
Cby1	-0.0494991	1	0.0421713	1	-0.0138918	1	0.0746788	1	1	0.0133648
Cc2d1a	0.0418614	1	0.0471375	1	0.0360368	1	-0.0108285	1	1	0.0285518
Cc2d1b	0.0247591	1	0.0914762	1	0.0270569	1	0.0338315	1	1	0.0442809
Cc2d2a	0.0305113	1	-0.00819626	1	0.0239836	1	0.0649524	1	1	0.0278128
Ccar1	0.00402989	1	-0.0743048	1	0.042107	1	0.111121	1	1	0.0207383
Ccar2	-0.0215615	1	-0.0477224	1	0.0176997	1	-0.00252541	1	1	-0.0135274
Ccbe1	0.0699904	1	-0.031855	1	0.060594	1	0.0882519	1	1	0.0467453
Ccdc102a	-0.0415623	1	0.0297427	1	-0.0320561	1	-0.0343533	1	1	-0.0195572
Ccdc107	-0.00397076	1	0.0586145	1	-0.015228	1	-0.0317572	1	1	0.00191466
Ccdc112	0.0382787	1	0.053337	1	0.0979991	1	0.00851542	1	1	0.0495326
Ccdc114	-0.0102006	1	-0.00445904	1	0.0273712	1	-0.00990109	1	1	0.000702628
Ccdc115	-0.0246922	1	0.0132581	1	-0.00818083	1	-0.0391152	1	1	-0.0146825
Ccdc117	0.0603707	1	0.105704	1	-0.00380383	1	0.030767	1	1	0.0482595
Ccdc12	0.113577	1	-0.0185165	1	-0.00681128	1	0.143234	1	1	0.0578708
Ccdc120	0.0103111	1	0.00801768	1	0.0284347	1	0.00492743	1	1	0.0129227
Ccdc122	-0.0194851	1	-0.0375832	1	0.00859051	1	-0.0211598	1	1	-0.0174094
Ccdc124	0.116465	1	0.0145229	1	0.042758	1	0.0622068	1	1	0.0589881
Ccdc125	-0.0102501	1	0.0314975	1	-0.00179515	1	-0.00682563	1	1	0.00315666
Ccdc126	0.0640452	1	0.0242038	1	0.00811166	1	-0.0104364	1	1	0.021481
Ccdc127	0.0620984	1	-0.0245205	1	0.0202635	1	0.0519452	1	1	0.0274466
Ccdc130	-0.0103167	1	-0.00317624	1	0.00680334	1	0.0242736	1	1	0.004396
Ccdc136	0.011239	1	-0.010295	1	-0.00535564	1	0.0213595	1	1	0.00423699
Ccdc137	0.00255844	1	0.011006	1	0.0328037	1	0.0221072	1	1	0.0171188
Ccdc138	-0.0250894	1	0.0164308	1	0.0210869	1	0.119931	1	1	0.0330899
Ccdc14	-0.00112039	1	0.0252946	1	0.0148958	1	-0.00626921	1	1	0.00820022
Ccdc149	0.00875274	1	-0.00724318	1	-0.000297015	1	-0.000822312	1	1	9.75576e-05
Ccdc15	0.0109917	1	-0.0112339	1	0.0291321	1	-0.0616051	1	1	-0.00817878
Ccdc157	-0.00182831	1	0.0118202	1	0.00330256	1	0.0179917	1	1	0.00782153
Ccdc163	-0.019801	1	-0.0435663	1	0.00165687	1	-0.0279448	1	1	-0.0224138
Ccdc167	-0.0248232	1	0.0326434	1	0.0249558	1	0.142413	1	1	0.0437973
Ccdc173	-0.0252414	1	-0.00312884	1	0.000913521	1	0.0134787	1	1	-0.00349451
Ccdc174	-0.00469815	1	-0.126971	1	-0.00227575	1	0.0855881	1	1	-0.0120892
Ccdc18	-0.040362	1	0.0060903	1	0.0210296	1	0.0190693	1	1	0.00145681
Ccdc181	0.0283666	1	0.160575	1	0.0278142	1	0.0382478	1	1	0.0637508
Ccdc186	-0.05173	1	-0.0771306	1	0.0790608	1	-0.0377046	1	1	-0.0218761
Ccdc189	0.0126833	1	0.00680815	1	0.00385733	1	0.0125603	1	1	0.00897727
Ccdc191	0.0280862	1	-0.00330347	1	0.0295228	1	0.0302861	1	1	0.0211479
Ccdc22	-0.0109494	1	-0.0234716	1	-0.0266798	1	-0.00369853	1	1	-0.0161998
Ccdc25	-0.0991673	1	0.061991	1	-0.0197388	1	-0.0666388	1	1	-0.0308884
Ccdc28a	-0.0515162	1	-0.0383667	1	0.0083463	1	-0.00303156	1	1	-0.021142
Ccdc28b	-0.0181679	1	-0.00987071	1	-0.0166243	1	-0.0118007	1	1	-0.0141159
Ccdc32	-0.00092052	1	-0.0532533	1	0.00414647	1	-0.024788	1	1	-0.0187038
Ccdc34	0.000293535	1	-0.0591623	1	0.131886	1	-0.0390046	1	1	0.00850321
Ccdc43	-0.023179	1	0.0393649	1	-0.0189454	1	-0.0274263	1	1	-0.00754645
Ccdc47	0.00571281	1	-0.0827151	1	-0.00290204	1	0.0173834	1	1	-0.0156302
Ccdc50	0.07844	1	0.00567158	1	0.000502135	1	0.102604	1	1	0.0468044
Ccdc51	0.000296336	1	-0.0151149	1	0.00895706	1	0.00754114	1	1	0.000419905
Ccdc57	-0.00692495	1	-6.74117e-05	1	0.00599804	1	0.00474836	1	1	0.00093851
Ccdc58	0.035312	1	0.097522	1	-0.00695511	1	0.0857117	1	1	0.0528976
Ccdc59	0.0108211	1	-0.0807539	1	0.00671364	1	-0.119645	1	1	-0.0457159
Ccdc6	0.0171924	1	-0.024671	1	0.00384622	1	0.0503283	1	1	0.011674
Ccdc61	0.0168162	1	-0.0472599	1	0.0304139	1	-0.00229855	1	1	-0.000582076
Ccdc66	-0.0272405	1	0.00488921	1	-0.0454747	1	0.000967537	1	1	-0.0167146
Ccdc68	-0.0404529	1	-0.0449999	1	-0.0728924	1	-0.0108606	1	1	-0.0423014
Ccdc71	0.00592689	1	-0.0173141	1	0.0312267	1	0.012822	1	1	0.00816535
Ccdc71l	0.0430797	1	-0.0335544	1	-0.00593612	1	-0.0124603	1	1	-0.00221777
Ccdc77	-0.022801	1	-0.00442497	1	0.0143672	1	0.0130451	1	1	4.65958e-05
Ccdc82	-0.0593906	1	-0.0240127	1	-0.00159414	1	0.00130543	1	1	-0.020923
Ccdc84	0.0113745	1	-0.0232486	1	0.0276928	1	-0.0154987	1	1	7.99935e-05
Ccdc85b	0.0671825	1	0.0715047	1	0.0339605	1	-0.0318025	1	1	0.0352113
Ccdc85c	-0.0167634	1	-0.00370948	1	-0.00268941	1	0.0105605	1	1	-0.00315045
Ccdc86	0.0980127	1	0.119191	1	0.0773441	1	-0.0492622	1	1	0.0613214
Ccdc88a	-0.038162	1	-0.115929	1	-0.0360073	1	-0.160253	1	1	-0.0875879
Ccdc88c	-0.0281688	1	-0.00910992	1	-0.0322117	1	0.00924535	1	1	-0.0150613
Ccdc9	-0.00785585	1	0.0177184	1	0.0344029	1	0.0180171	1	1	0.0155707
Ccdc90b	-0.00808295	1	-0.0693142	1	0.0122221	1	0.0546814	1	1	-0.00262342
Ccdc91	0.00819806	1	-0.0100667	1	-0.0076294	1	0.0137752	1	1	0.00106929
Ccdc92	-0.0166612	1	0.0102856	1	-0.002295	1	0.0969837	1	1	0.0220783
Ccdc93	-0.0117006	1	0.0290207	1	0.000903491	1	-0.0171177	1	1	0.000276495
Ccdc94	0.0335063	1	-0.0119452	1	0.0136583	1	-0.00234747	1	1	0.00821796
Ccdc97	0.0388329	1	-0.0969974	1	0.0323765	1	-0.00446491	1	1	-0.00756323
Cchcr1	0.0283566	1	0.0218532	1	0.0231526	1	0.00351261	1	1	0.0192188
Ccl2	0.324264	1	0.549845	1	0.69544	1	-0.21364	1	1	0.338977
Ccl25	0.0590613	1	-0.00173721	1	0.0609961	1	0.125311	1	1	0.0609078
Ccl3	-0.117445	1	-0.0178467	1	-0.00549854	1	0.0833209	1	1	-0.0143673
Ccl4	-0.0418921	1	0.0464414	1	-0.0412286	1	-0.080655	1	1	-0.0293336
Ccl5	0.0940643	1	0.0868329	1	0.0925989	1	-0.209833	1	1	0.0159157
Ccl6	-0.055898	1	0.0413646	1	0.00302377	1	-0.00224688	1	1	-0.00343912
Ccm2	0.0654618	1	0.042765	1	0.0569932	1	-0.0475707	1	1	0.0294123
Ccna2	-0.247836	1	-0.0565006	1	0.0158172	1	-0.0794062	1	1	-0.0919815
Ccnb1	-0.201369	1	-0.049161	1	0.0353875	1	-0.0277271	1	1	-0.0607175
Ccnb1ip1	0.00566266	1	-0.0071906	1	0.0113547	1	0.128704	1	1	0.0346328
Ccnb2	-0.177712	1	-0.0170493	1	0.00388637	1	0.0147246	1	1	-0.0440377
Ccnc	0.0335964	1	-0.0109453	1	0.0288096	1	-0.00503541	1	1	0.0116063
Ccnd1	0.357311	1	0.0334637	1	0.173909	1	0.0637911	1	1	0.157119
Ccnd2	-0.13753	1	-0.100698	1	-0.0885999	0.024841	-0.0578719	1	0.495143	-0.0961749
Ccnd3	0.0319045	1	0.0162906	1	-0.0510983	1	0.0680039	1	1	0.0162752
Ccndbp1	0.0374674	1	0.0907271	1	-0.0135418	1	-0.0293576	1	1	0.0213238
Ccne1	0.0484409	1	0.00365226	1	0.0338181	1	-0.0216479	1	1	0.0160658
Ccne2	-0.0257235	1	0.0398533	1	0.00751246	1	-0.0105183	1	1	0.00278098
Ccnf	-0.0421522	1	-0.0355178	1	0.00600266	1	0.00631303	1	1	-0.0163386
Ccng1	0.0714685	1	-0.00820725	1	0.0391259	1	0.0608761	1	1	0.0408158
Ccng2	-0.154953	1	-0.0967365	1	-0.0103348	1	-0.0552774	1	1	-0.0793253
Ccnh	-0.0192753	1	-0.0943894	1	0.0392329	1	-0.00601255	1	1	-0.0201111
Ccni	0.0918608	1	0.0700693	1	0.00809448	1	0.110629	1	1	0.0701633
Ccnj	0.0356449	1	0.0113913	1	0.0420015	0.427841	-0.000974028	1	0.988912	0.0220159
Ccnk	-0.0477713	1	-0.101291	1	-0.0818569	1	-0.0733493	1	1	-0.0760671
Ccnl1	-0.128977	1	-0.370371	1	-0.182336	1	-0.298231	1	1	-0.244979
Ccnl2	0.0863342	1	0.00318837	1	0.00647457	1	-0.0178106	1	1	0.0195466
Ccnt1	0.0108915	1	-0.0448628	1	-0.00425185	1	-0.0427944	1	1	-0.0202544
Ccnt2	0.0362782	1	-0.0386858	1	0.0393456	1	0.0335761	1	1	0.0176285
Ccny	0.0548966	1	0.0539951	1	-0.0042292	1	-0.0174083	1	1	0.0218135
Ccnyl1	-0.0175748	1	-0.00258234	1	-0.00507794	1	-0.00299693	1	1	-0.007058
Ccp110	0.0188954	1	-0.00942615	1	0.0194042	1	-0.00719743	1	1	0.00541898
Ccpg1	0.00017848	1	0.0553045	1	0.00969434	1	-0.0139912	1	1	0.0127965
Ccpg1os	-0.00357807	1	-0.0529278	1	0.0316622	1	0.0181668	1	1	-0.00166923
Ccrl2	-0.0872713	1	0.171693	1	0.00325301	1	0.0250351	1	1	0.0281776
Ccs	0.0354059	1	0.162041	1	0.0230443	1	-0.00758703	1	1	0.0532259
Ccsap	-0.0274237	1	-0.0488554	1	0.0337455	1	0.0192863	1	1	-0.00581183
Ccser2	-0.0126628	1	-0.00652719	1	-0.0256426	1	0.1026	1	1	0.0144419
Cct2	0.102907	1	0.00341776	1	0.0852467	1	0.0703083	1	1	0.0654698
Cct3	-0.0719839	1	0.015741	1	-0.0919286	1	-0.0369743	1	1	-0.0462865
Cct4	0.0869469	1	-0.0461676	1	0.0669457	1	0.104566	1	1	0.0530727
Cct5	-0.182581	1	-0.229859	1	-0.209748	1.13393e-09	-0.0999731	1	1.91655e-06	-0.18054
Cct7	0.11853	1	0.174774	1	0.0439411	1	0.179692	1	1	0.129234
Cct8	0.162732	1	0.0171843	1	0.0566753	1	0.0493634	1	1	0.0714887
Ccz1	0.0719523	1	0.0303064	1	0.0296141	1	0.134098	1	1	0.0664927
Cd14	-0.0751137	1	-0.137806	1	-0.0444406	1	-0.0405182	1	1	-0.0744695
Cd151	0.0394183	1	0.0669744	1	0.0642906	1	0.0719803	1	1	0.0606659
Cd164	0.0737765	1	-0.0705737	1	-0.0132973	1	0.0279537	1	1	0.0044648
Cd1d1	0.0555801	1	0.228092	1	0.0465607	1	0.0244733	1	1	0.0886766
Cd24a	0.204726	1	0.180644	1	0.180997	0.0887043	0.04475	1	0.774018	0.152779
Cd274	-0.0350526	1	-0.0286327	1	0.0368127	1	-0.0215422	1	1	-0.0121037
Cd276	0.0397798	1	-0.0370153	1	0.0238592	1	0.105907	1	1	0.0331327
Cd2ap	0.00813534	1	-0.0843378	1	0.0351477	1	-0.0883746	1	1	-0.0323574
Cd2bp2	0.0202485	1	-0.00873184	1	0.0552322	1	-0.062672	1	1	0.00101922
Cd300lf	-0.0572204	1	0.00918466	1	-0.006959	1	0.000570122	1	1	-0.0136062
Cd320	0.0264512	1	-0.00260877	1	0.0410973	1	0.0257811	1	1	0.0226802
Cd33	-0.0268632	1	-0.0238994	1	-0.0154738	1	0.0151115	1	1	-0.0127812
Cd3eap	-0.00756092	1	0.095063	1	0.00713097	1	-0.0513763	1	1	0.0108142
Cd40	-0.0279577	1	-0.0273433	1	0.00422531	1	0.000851009	1	1	-0.0125562
Cd44	0.111371	1	-0.165743	1	-0.0257884	1	-0.0116218	1	1	-0.0229454
Cd47	0.100249	1	-0.0955027	1	0.00680945	1	-0.0498133	1	1	-0.00956447
Cd52	-0.0872964	1	0.0515188	1	-0.00504592	1	0.0276149	1	1	-0.00330217
Cd53	-0.0368298	1	-0.0579232	1	-0.019542	1	-0.0776897	1	1	-0.0479962
Cd63	-0.0561084	1	-0.116858	1	-0.114741	1	-0.212721	1	1	-0.125107
Cd68	-0.00827262	1	0.0139453	1	-0.0167941	1	0.0232237	1	1	0.00302558
Cd74	0.232356	1	0.11235	1	0.256026	0.0484013	0.24592	1	0.640908	0.211663
Cd81	-0.198543	1	-0.063445	1	-0.197565	0.00132015	-0.173455	1	0.103211	-0.158252
Cd82	0.263066	1	-0.0158415	1	0.0237503	1	0.109437	1	1	0.0951028
Cd9	0.200241	1	0.172616	1	0.0710678	1	0.263849	1	1	0.176943
Cd99l2	0.0105	1	-0.076132	1	0.00312278	1	0.0128401	1	1	-0.0124173
Cda	-0.0939307	1	-0.0792238	1	-0.136762	0.60488	0.0162572	1	0.998214	-0.0734149
Cdadc1	-0.0415315	1	0.138225	1	-0.0319043	1	-0.0114111	1	1	0.0133445
Cdan1	-0.00267054	1	0.0157372	1	0.000951899	1	0.00261907	1	1	0.0041594
Cdc123	-0.159676	1	-0.133929	1	-0.120553	0.232019	-0.208634	1	0.939164	-0.155698
Cdc14a	-0.0500657	1	-0.0313339	1	-0.0490159	1	0.00165497	1	1	-0.0321901
Cdc14b	-0.0102942	1	0.0519717	1	0.0422064	1	0.00970003	1	1	0.023396
Cdc16	0.00681177	1	-0.0208628	1	0.0121097	1	-0.0127382	1	1	-0.00366989
Cdc20	-0.225995	1	-0.0211386	1	0.0822956	1	0.0885611	1	1	-0.0190692
Cdc23	-0.0206167	1	0.100881	1	0.0291805	1	0.0262454	1	1	0.0339225
Cdc25a	-0.00554267	1	0.0791474	1	0.0245185	1	0.0101557	1	1	0.0270697
Cdc25b	-0.0578734	1	0.0547903	1	0.00294215	1	-0.00549942	1	1	-0.0014101
Cdc25c	-0.0615986	1	-0.0179116	1	-0.000428684	1	0.00572154	1	1	-0.0185543
Cdc26	-0.0080416	1	0.0951058	1	0.0146976	1	0.01207	1	1	0.0284579
Cdc27	-0.0538239	1	-0.0785985	1	-0.0184752	1	-0.025708	1	1	-0.0441514
Cdc34	0.0574515	1	0.310218	1	0.0105494	1	0.0608905	1	1	0.109777
Cdc37	0.00671682	1	0.143601	1	0.0287087	1	0.0419377	1	1	0.0552411
Cdc37l1	0.083164	1	0.0724149	1	0.081368	1	0.0820249	1	1	0.0797429
Cdc40	0.038021	1	0.0277748	1	-0.00628898	1	0.0184462	1	1	0.0194882
Cdc42	0.0192659	1	0.0274953	1	-0.00881485	1	-0.0746202	1	1	-0.00916848
Cdc42bpa	-0.0582128	1	0.0155921	1	0.0218473	1	0.0173248	1	1	-0.000862163
Cdc42bpb	-0.032709	1	-0.169069	1	-0.0903675	1	-0.104686	1	1	-0.0992078
Cdc42bpg	0.0216244	1	-0.0186006	1	-0.00779973	1	-0.0117268	1	1	-0.00412567
Cdc42ep1	0.0412992	1	-0.0664806	1	0.0179389	1	0.17618	1	1	0.0422343
Cdc42ep3	-0.0238069	1	-0.0941261	1	-0.0527281	1	-0.0626261	1	1	-0.0583218
Cdc42ep4	-0.0436573	1	-0.102953	1	-0.00455476	1	0.11466	1	1	-0.00912626
Cdc42ep5	0.0590764	1	-0.077521	1	-0.00738746	1	-0.0498181	1	1	-0.0189125
Cdc42se1	-0.0255796	1	0.106597	1	-0.0530796	1	-0.0467703	1	1	-0.00470804
Cdc42se2	0.0346987	1	0.0391658	1	0.0198864	1	0.00291697	1	1	0.024167
Cdc45	0.00328927	1	-0.0244915	1	0.019826	1	-0.0235393	1	1	-0.00622885
Cdc5l	-0.0160902	1	0.056678	1	0.0514118	1	-0.00666757	1	1	0.021333
Cdc6	0.00363639	1	-0.00580537	1	0.0200402	1	-0.0237943	1	1	-0.00148078
Cdc7	0.000378658	1	0.00138678	1	0.0194423	1	-0.00340631	1	1	0.00445036
Cdc73	0.0204924	1	-0.0595722	1	-0.014002	1	-0.0331575	1	1	-0.0215598
Cdca2	-0.0790296	1	0.0156933	1	-0.00770654	1	-0.0390075	1	1	-0.0275126
Cdca3	-0.0517467	1	0.170564	1	0.0266983	1	0.0091133	1	1	0.0386571
Cdca4	-0.0906767	1	-0.0880396	1	-0.0334713	1	-0.0971258	1	1	-0.0773283
Cdca5	-0.013585	1	0.00184982	1	0.0515238	1	-0.0163982	1	1	0.00584762
Cdca7	0.074395	1	0.0336617	1	0.0276752	1	-0.000956525	1	1	0.0336938
Cdca7l	0.0124405	1	0.185627	1	-0.0194579	1	-0.0887419	1	1	0.0224668
Cdca8	-0.212248	1	-0.150021	1	0.0912165	1	0.0321386	1	1	-0.0597285
Cdcp1	0.186191	0.0276052	0.0991013	1	0.148765	0.000114789	0.0985662	1	0.00136949	0.133156
Cdh1	0.324557	3.1519e-07	0.131088	1	0.246446	6.1749e-09	0.228408	1	1.37913e-11	0.232625
Cdh24	-0.00177848	1	-0.00785834	1	-0.00586747	1	-0.00872663	1	1	-0.00605773
Cdip1	-0.00398878	1	-0.0123751	1	0.0099939	1	-0.0085119	1	1	-0.00372047
Cdipt	0.015498	1	0.0677733	1	0.0463748	1	-0.00724268	1	1	0.0306009
Cdk1	-0.252924	1	-0.0342913	1	0.0480166	1	-0.165077	1	1	-0.101069
Cdk10	0.140938	1	0.0458181	1	0.0376317	1	0.136118	1	1	0.0901266
Cdk11b	-0.0347726	1	0.025852	1	-0.0099197	1	0.0250346	1	1	0.00154856
Cdk12	0.0461104	1	-0.102169	1	0.031205	1	0.110778	1	1	0.0214812
Cdk13	0.126086	1	0.113261	1	0.0500841	1	0.00296291	1	1	0.0730985
Cdk14	0.0560263	1	-0.110542	1	-0.0054712	1	0.000485364	1	1	-0.0148754
Cdk16	0.000249238	1	0.0385677	1	-0.00817969	1	0.0653502	1	1	0.0239969
Cdk17	-0.0262644	1	-0.0722609	1	0.0072356	1	-0.0110769	1	1	-0.0255917
Cdk18	0.0115733	1	0.0474577	1	-0.00940528	1	0.0102052	1	1	0.0149577
Cdk19	0.000300726	1	0.076874	1	0.0151511	1	-0.0133839	1	1	0.0197355
Cdk2	0.0657973	1	-0.00515002	1	-0.000136147	1	-0.00113638	1	1	0.0148437
Cdk20	0.0050807	1	-0.000733718	1	-0.000678719	1	-0.0115129	1	1	-0.00196115
Cdk2ap1	-0.023882	1	0.0057979	1	-0.0279458	1	0.0228928	1	1	-0.00578428
Cdk2ap2	-0.0572664	1	0.063915	1	0.0657094	1	-0.0534432	1	1	0.00472868
Cdk4	0.110372	1	0.258305	1	0.109041	1	0.205541	1	1	0.170815
Cdk5	0.147856	1	0.00723926	1	0.0191003	1	0.0114234	1	1	0.0464047
Cdk5r1	-0.021183	1	-0.0176595	1	0.00362093	1	-0.0139506	1	1	-0.012293
Cdk5rap1	0.00349323	1	0.065101	1	-0.00475197	1	0.0168953	1	1	0.0201844
Cdk5rap2	-0.00298757	1	-0.0284023	1	0.0345298	1	-0.00220693	1	1	0.000233248
Cdk5rap3	0.0471606	1	-0.0318229	1	-0.0105889	1	-0.00337542	1	1	0.000343354
Cdk6	0.0165198	1	0.0063009	1	-0.0135048	1	0.0513845	1	1	0.0151751
Cdk7	0.0210271	1	0.0385417	1	0.0529688	1	-0.027789	1	1	0.0211872
Cdk8	0.0275254	1	0.0515678	1	0.0216667	1	-0.0137304	1	1	0.0217574
Cdk9	0.0334596	1	-0.185323	1	0.0357513	1	0.141005	1	1	0.00622324
Cdkal1	0.0134707	1	0.00092702	1	0.0530819	1	0.00278664	1	1	0.0175666
Cdkl2	0.108859	1	0.196386	1	0.0812126	1	0.0705671	1	1	0.114256
Cdkl3	-0.00448147	1	-0.00779507	1	0.0243683	1	0.00892954	1	1	0.00525533
Cdkl5	-0.0245722	1	-0.00450307	1	-0.00348383	1	-0.010309	1	1	-0.010717
Cdkn1a	-0.0517732	1	-0.0817575	1	-0.112404	1	-0.0847062	1	1	-0.0826602
Cdkn1b	0.0364108	1	0.0163621	1	0.0207236	1	0.0919595	1	1	0.041364
Cdkn2aip	0.263387	0.21239	-0.00429043	1	0.159138	0.0229217	0.148461	1	0.22233	0.141674
Cdkn2aipnl	-0.0461148	1	0.0485637	1	-0.000716272	1	-0.0936288	1	1	-0.022974
Cdkn2c	0.193898	1	0.131071	1	-0.0162786	1	-0.0457608	1	1	0.0657322
Cdkn2d	-0.0760317	1	-0.00874696	1	0.0363093	1	-0.00699254	1	1	-0.0138655
Cdkn3	-0.136812	1	-0.146213	1	0.000872269	1	-0.0440679	1	1	-0.0815551
Cdon	-0.0291947	1	-0.0925265	1	-0.0201607	1	-0.00524716	1	1	-0.0367823
Cdpf1	0.0205383	1	0.0674995	1	-0.0134418	1	-0.00371685	1	1	0.0177198
Cdr2	-0.00685296	1	0.0231088	1	0.0213496	1	-0.00492412	1	1	0.00817033
Cdr2l	-0.00369692	1	0.0137298	1	0.0208179	1	0.00571003	1	1	0.00914022
Cds2	-0.0041884	1	-0.0146179	1	0.000795516	1	0.145875	1	1	0.031966
Cdt1	0.0909856	1	0.189592	1	0.0688398	1	0.0936077	1	1	0.110756
Cdv3	0.155729	1	0.0858059	1	0.0733866	1	0.0484104	1	1	0.090833
Cdyl	0.00556757	1	0.0297755	1	-0.0110669	1	-0.0352336	1	1	-0.00273934
Cebpb	-0.00916881	1	-0.150908	1	-0.25641	1	-0.124213	1	1	-0.135175
Cebpd	-0.0443623	1	-0.0435803	1	-0.123175	1	-0.0495544	1	1	-0.0651681
Cebpg	0.0339826	1	-0.0784002	1	0.112148	1	0.0411721	1	1	0.0272255
Cebpz	-0.0324084	1	-0.0542534	1	0.0324114	1	-0.0542912	1	1	-0.0271354
Cebpzos	-0.0145777	1	-0.0978277	1	-0.00405517	1	0.0170901	1	1	-0.0248426
Celf1	0.0892447	1	-0.0628936	1	0.0828022	1	0.0117059	1	1	0.0302148
Celf2	-0.0669698	1	-0.050937	1	-0.0513257	1	-0.069157	1	1	-0.0595974
Celf4	0.0727074	1	0.0932507	1	0.1106	1	0.0794839	1	1	0.0890105
Celsr1	0.0235289	1	-0.00637241	1	0.0189569	1	0.00157916	1	1	0.00942313
Cenpa	-0.24946	1	-0.180949	1	0.0346589	1	0.22177	1	1	-0.0434951
Cenpb	0.122855	1	0.36356	1	0.0324416	1	0.00282054	1	1	0.130419
Cenpc1	-0.0321446	1	-0.0460946	1	0.0619514	1	0.0335516	1	1	0.00431596
Cenpe	-0.39778	1	-0.117247	1	-0.051085	1	-0.0569434	1	1	-0.155764
Cenpf	-0.537373	1	0.142772	1	0.115572	1	0.00448991	1	1	-0.0686345
Cenph	0.0468053	1	0.0298727	1	0.0700056	1	-0.0284901	1	1	0.0295484
Cenpi	-0.00703537	1	-0.0120871	1	0.000352345	1	-0.0270598	1	1	-0.0114575
Cenpj	-0.0197033	1	-0.0120594	1	-0.010654	1	0.0950545	1	1	0.0131594
Cenpk	-0.0269132	1	-0.0161143	1	0.0290805	1	-0.0233791	1	1	-0.00933153
Cenpl	-0.061786	1	-0.0152027	1	0.0196246	1	-0.0193339	1	1	-0.0191745
Cenpm	0.0252907	1	0.018206	1	0.0142461	1	-0.0344073	1	1	0.00583387
Cenpn	-0.0266945	1	0.016863	1	0.0407075	1	-0.00994761	1	1	0.00523208
Cenpo	-0.00532389	1	-0.0139598	1	-0.00664813	1	0.00463233	1	1	-0.00532487
Cenpp	-0.0539472	1	0.0339063	1	0.043234	1	-0.030269	1	1	-0.00176898
Cenpq	-0.0434678	1	0.0937045	1	0.0448717	1	0.015775	1	1	0.0277208
Cenps	0.0225536	1	0.0340288	1	0.0244615	1	-0.051804	1	1	0.00730999
Cenpt	0.00489297	1	0.0561551	1	0.0187287	1	-0.0226987	1	1	0.0142695
Cenpu	-0.00457305	1	0.0442027	1	0.0347234	1	-0.0114863	1	1	0.0157167
Cenpv	0.151538	1	0.0559532	1	0.149864	0.0515549	0.0495074	1	0.655049	0.101716
Cenpw	-0.0841987	1	0.076547	1	0.0651145	1	0.160889	1	1	0.0545879
Cenpx	-0.113669	1	-0.0433906	1	-0.0633125	1	-0.0484524	1	1	-0.0672062
Cep104	-0.00661345	1	-0.0256361	1	-0.00106442	1	0.0186299	1	1	-0.003671
Cep112	0.0361104	1	0.00932708	1	0.0108414	1	-0.0163106	1	1	0.00999207
Cep120	-0.00507593	1	-0.00683298	1	0.00678521	1	0.00556738	1	1	0.000110921
Cep126	-0.0166834	1	0.0181582	1	0.00276617	1	0.0097718	1	1	0.0035032
Cep131	0.0102554	1	-0.0319681	1	-0.00232868	1	0.0388312	1	1	0.00369747
Cep135	0.0111062	1	-0.0407707	1	0.0144285	1	0.0113314	1	1	-0.000976155
Cep152	0.00228242	1	-0.00708018	1	0.0185164	1	-0.00904521	1	1	0.00116836
Cep162	-0.0210155	1	0.0324049	1	0.0492267	1	0.0238027	1	1	0.0211047
Cep164	0.0212408	1	0.0223175	1	0.0273458	1	0.0546588	1	1	0.0313907
Cep170	-0.0552545	1	-0.0288973	1	-0.0155538	1	-0.0214347	1	1	-0.0302851
Cep170b	0.00105262	1	-0.0960816	1	-0.024486	1	-0.022967	1	1	-0.0356205
Cep19	0.0239973	1	0.0823579	1	0.0408738	1	0.00257364	1	1	0.0374507
Cep192	0.00697527	1	0.0553607	1	0.0334216	1	-0.024336	1	1	0.0178554
Cep250	-0.0194952	1	0.0344545	1	0.010118	1	0.0178315	1	1	0.0107272
Cep290	0.0434486	1	0.0332116	1	0.0915421	1	0.0802256	1	1	0.0621069
Cep295	0.0115102	1	-0.0065308	1	0.0294036	1	0.107838	1	1	0.0355552
Cep350	0.0636378	1	-0.0318919	1	0.0131324	1	-0.012797	1	1	0.00802033
Cep41	0.0110786	1	0.0353449	1	0.00554786	1	-0.00544062	1	1	0.0116327
Cep44	-0.0166405	1	-0.0546553	1	0.0106195	1	0.0300399	1	1	-0.0076591
Cep55	-0.0755329	1	-0.0780111	1	0.11073	1	0.14423	1	1	0.025354
Cep57	-0.0615289	1	0.0221674	1	0.1016	1	-0.000160577	1	1	0.0155196
Cep57l1	-0.00387874	1	0.00226697	1	0.0302033	1	0.0167924	1	1	0.011346
Cep63	0.0178606	1	0.0232624	1	0.0283986	1	0.0698134	1	1	0.0348337
Cep68	0.024408	1	0.000967434	1	0.00833798	1	0.00169146	1	1	0.00885123
Cep70	-0.0182855	1	-0.0594581	1	0.00890589	1	-0.0752612	1	1	-0.0360247
Cep76	-0.015257	1	-0.0128565	1	0.0108162	1	-0.0165625	1	1	-0.00846496
Cep78	0.0362151	1	0.00998692	1	0.022355	1	0.00626103	1	1	0.0187045
Cep83	-0.0262843	1	0.062025	1	0.0902846	1	-0.0321891	1	1	0.0234591
Cep85	-0.0116879	1	0.00168854	1	0.00105572	1	-0.00929186	1	1	-0.00455889
Cep85l	-0.0018766	1	-0.034786	1	-0.00648023	1	0.016496	1	1	-0.00666171
Cep89	-0.0117025	1	-0.0205805	1	0.0295711	1	0.0529863	1	1	0.0125686
Cep95	0.0322698	1	-0.0194833	1	0.00353043	1	-0.0316585	1	1	-0.00383539
Cep97	-0.00129295	1	-0.00297706	1	-0.00215473	1	-0.00479327	1	1	-0.0028045
Cept1	-0.0188435	1	-0.0474735	1	-0.00881894	1	-0.0686733	1	1	-0.0359523
Cerk	0.0107865	1	0.00162653	1	-0.00739689	1	-0.00437718	1	1	0.000159747
Cers2	-0.00813661	1	-0.0603232	1	-0.0583956	1	-0.0438171	1	1	-0.0426681
Cers5	0.00488223	1	-0.079818	1	-0.0554405	1	0.0102382	1	1	-0.0300345
Cers6	0.00250998	1	0.141245	1	-0.0105158	1	0.0083719	1	1	0.0354028
Cetn2	0.0668692	1	-0.0571079	1	0.04429	1	0.0440008	1	1	0.024513
Cetn3	0.15799	1	-0.0269826	1	0.0975508	1	0.125413	1	1	0.0884928
Cetn4	-0.0200017	1	-0.0215089	1	-0.00801949	1	0.0170622	1	1	-0.00811698
Cfap20	0.083994	1	0.122253	1	0.115504	0.107405	0.0295378	1	0.813193	0.0878223
Cfap36	0.00398179	1	0.218853	1	0.0942274	1	0.0437354	1	1	0.0901995
Cfap43	-0.0681251	1	-0.0146254	1	0.0090817	1	0.0123415	1	1	-0.0153318
Cfap97	-0.0112823	1	0.194596	1	0.0327666	1	-0.00751802	1	1	0.0521406
Cfdp1	0.138851	0.359545	0.0447519	1	0.123009	1	0.0299906	1	0.979575	0.0841505
Cfl1	0.17041	1	0.00590697	1	0.207351	2.14865e-05	0.0755043	1	0.0059399	0.114793
Cfl2	-0.0591404	1	-0.173448	1	-0.0491871	1	-0.123724	1	1	-0.101375
Cflar	-0.0193694	1	-0.0230296	1	0.0797199	1	0.0448697	1	1	0.0205477
Cggbp1	-0.0204386	1	0.059059	1	0.0413771	1	-0.0334044	1	1	0.0116483
Cgn	0.0105494	1	0.018656	1	0.0207609	1	0.0390478	1	1	0.0222535
Cgnl1	0.216686	0.0406415	-0.0225473	1	0.157017	0.438582	0.332293	1	0.428179	0.170862
Cgref1	0.0021868	1	0.012265	1	0.00138597	1	-0.0201076	1	1	-0.00106744
Cgrrf1	-0.0872105	1	-0.102847	1	-0.0308244	1	-0.065553	1	1	-0.0716087
Chac2	-0.0381702	1	0.0103366	1	0.00948549	1	0.00954294	1	1	-0.00220128
Chaf1a	0.0059213	1	-0.0161652	1	0.0641775	1	-0.0778241	1	1	-0.00597264
Chaf1b	0.0526054	1	0.0495653	1	0.0753171	1	0.246105	1	1	0.105898
Champ1	0.0391691	1	0.100886	1	0.0116873	1	0.0233942	1	1	0.0437842
Chchd1	-0.15235	1	-0.173448	1	-0.0829356	1	-0.17896	1	1	-0.146924
Chchd10	-0.0554438	1	0.203266	1	0.051807	1	0.0436206	1	1	0.0608125
Chchd2	0.0560053	1	-0.0229964	1	-0.0924842	1	0.0128725	1	1	-0.0116507
Chchd3	0.046281	1	0.0836089	1	0.0536528	1	0.186441	1	1	0.0924958
Chchd4	0.0467177	1	0.0400126	1	-0.0192602	1	-0.0025532	1	1	0.0162292
Chchd5	-0.0661384	1	-0.0337726	1	0.00364007	1	0.145283	1	1	0.0122529
Chchd6	0.0348057	1	0.0172621	1	0.0981746	0.193389	-0.0085882	1	0.915142	0.0354135
Chchd7	-0.0202186	1	0.0197818	1	-0.0579162	1	-0.0182013	1	1	-0.0191386
Chd1	0.0672883	1	-0.0202403	1	0.0455025	1	-0.0205151	1	1	0.0180089
Chd1l	-0.0255927	1	-0.0188501	1	-0.0205203	1	-0.012716	1	1	-0.0194198
Chd2	0.0139463	1	-0.109908	1	0.0388937	1	0.098324	1	1	0.0103141
Chd3	0.0210388	1	0.107546	1	0.0265855	1	0.0468889	1	1	0.0505149
Chd4	-0.0533325	1	0.0922048	1	-0.00764789	1	0.0702479	1	1	0.0253681
Chd6	-0.0434596	1	0.0640445	1	-0.0294245	1	-0.0161602	1	1	-0.00624993
Chd7	-0.0305429	1	-0.0493028	1	-0.0852489	0.956903	-0.016491	1	1	-0.0453964
Chd8	-0.0237396	1	-0.109838	1	-0.0651094	1	0.091058	1	1	-0.0269073
Chd9	0.0744976	1	0.0565576	1	0.0239662	1	0.0594434	1	1	0.0536162
Chek1	0.0628072	1	0.0169058	1	0.0791062	1	0.0182621	1	1	0.0442703
Chek2	-0.0167816	1	-0.00154431	1	-0.0103152	1	-0.0122092	1	1	-0.0102126
Cherp	0.145	1	0.136593	1	0.039246	1	0.0749967	1	1	0.0989588
Chfr	0.0171635	1	0.0555498	1	0.0122437	1	0.0115024	1	1	0.0241148
Chic2	0.0458682	1	0.0499052	1	-0.0236164	1	-0.0663465	1	1	0.00145265
Chid1	-0.0295761	1	-0.038557	1	-0.0211559	1	0.172377	1	1	0.0207719
Chka	-0.0142834	1	-0.116537	1	0.0745059	1	0.107909	1	1	0.0128987
Chkb	-0.0302461	1	-0.0726612	1	0.0105047	1	0.00938499	1	1	-0.0207544
Chm	0.00776235	1	-0.0119576	1	0.0373553	1	0.0773314	1	1	0.0276229
Chml	0.00904319	1	0.0331173	1	0.041639	1	0.00554032	1	1	0.0223349
Chmp1a	0.105083	1	-0.0144312	1	0.0278623	1	0.116318	1	1	0.0587082
Chmp1b	0.0698723	1	0.111551	1	0.0430302	1	0.0104553	1	1	0.0587271
Chmp2a	0.0443375	1	-0.023688	1	0.0698137	1	0.14452	1	1	0.0587458
Chmp2b	-0.00281774	1	0.0267686	1	-0.0207632	1	0.00930642	1	1	0.0031235
Chmp3	0.0645288	1	0.0915653	1	0.0164132	1	0.0672602	1	1	0.0599419
Chmp4b	0.0553385	1	0.199259	1	0.0122735	1	0.0875402	1	1	0.0886028
Chmp4c	0.0589259	1	0.0551751	1	0.0393275	1	-0.000944758	1	1	0.0381209
Chmp5	0.0780757	1	-0.00773775	1	0.0154187	1	0.0954879	1	1	0.0453111
Chmp6	0.0816586	1	-0.0634373	1	-0.0346608	1	0.18873	1	1	0.0430727
Chmp7	-0.0418569	1	0.0462473	1	-0.0225404	1	-0.0428175	1	1	-0.0152419
Chn1	0.0135772	1	-0.0249062	1	0.0187738	1	0.0320624	1	1	0.0098768
Chordc1	0.0348462	1	0.173145	1	0.0423231	1	0.0862371	1	1	0.0841379
Chp1	0.027151	1	0.0808562	1	0.00800829	1	0.0110424	1	1	0.0317645
Chpf	-0.0349285	1	-0.087318	1	-0.00547542	1	-0.0136271	1	1	-0.0353373
Chpf2	0.0137597	1	-0.0151965	1	-0.0284871	1	-0.019618	1	1	-0.0123855
Chpt1	0.0396545	1	0.0267958	1	0.0411721	1	0.0952236	1	1	0.0507115
Chrac1	-0.046781	1	-0.0962285	1	-0.0375018	1	-0.0017573	1	1	-0.0455672
Chrna1os	-0.0097381	1	-0.00168628	1	-0.0211706	1	0.00184263	1	1	-0.00768808
Chrnb1	0.00550466	1	0.0126805	1	0.113292	1	0.0678659	1	1	0.0498358
Chst11	-0.062931	1	-0.0318235	1	-0.060483	0.566224	0.050088	1	0.997221	-0.0262874
Chst12	-0.000879416	1	0.134057	1	0.00144585	1	-0.0607429	1	1	0.0184702
Chst14	-0.000499941	1	-0.0280677	1	-0.00110362	1	-0.027721	1	1	-0.0143481
Chst2	-0.0529048	1	0.209242	1	0.0615936	1	0.060259	1	1	0.0695474
Chsy1	0.139664	1	0.143059	1	0.0253175	1	0.0797882	1	1	0.0969572
Chtf18	0.0137633	1	0.004551	1	0.0176626	1	-0.0145785	1	1	0.0053496
Chtf8	0.00962414	1	0.101046	1	0.0167099	1	0.209151	1	1	0.0841327
Chtop	-0.0994299	1	-0.0527818	1	0.00977149	1	-0.0308936	1	1	-0.0433335
Chuk	0.0423516	1	0.029393	1	0.0910086	0.36437	0.0596238	1	0.980419	0.0555943
Churc1	-0.0463742	1	-0.0990476	1	-0.0350685	1	0.0515703	1	1	-0.03223
Ciao1	-0.0203354	1	0.0337293	1	0.0122926	1	-0.0612016	1	1	-0.00887876
Ciapin1	0.113741	1	0.144942	1	0.129782	1	0.0973764	1	1	0.12146
Ciart	0.0146313	1	-0.00765943	1	-0.00819352	1	-0.0797176	1	1	-0.0202348
Cib1	0.0696937	1	-0.0287742	1	0.0502423	1	-0.00446663	1	1	0.0216738
Cib2	0.0665854	1	-0.00235764	1	0.029808	1	-0.028776	1	1	0.0163149
Cic	-0.000450332	1	0.297848	1	0.058133	1	0.109484	1	1	0.116254
Ciita	0.0293755	1	-0.0115938	1	0.0487833	1	0.00192777	1	1	0.0171232
Cinp	-0.130061	1	0.0217433	1	-0.0238256	1	-0.0914027	1	1	-0.0558865
Cipc	-0.0106326	1	0.0826292	1	0.0160472	1	-0.00388546	1	1	0.0210396
Cir1	-0.0260261	1	-0.0241657	1	0.0188168	1	0.132333	1	1	0.0252396
Cirbp	0.0448092	1	0.0160508	1	0.123959	1	-0.0083007	1	1	0.0441296
Cisd1	0.0380165	1	0.124015	1	0.0899483	1	0.0263213	1	1	0.0695754
Cisd2	-0.0913792	1	-0.149768	1	-0.0665418	1	-0.171605	1	1	-0.119824
Cisd3	0.0380267	1	-0.00360314	1	-0.0398702	1	-0.113047	1	1	-0.0296234
Cish	0.0240933	1	0.0643134	1	-0.134582	1	-0.0459153	1	1	-0.0230227
Cit	-0.0614825	1	0.0138433	1	0.0323073	1	-0.0168008	1	1	-0.00803316
Cited2	-0.109362	1	-0.0268421	1	-0.212861	1	-0.152835	1	1	-0.125475
Ciz1	0.010458	1	-0.0676482	1	-0.027319	1	0.0110295	1	1	-0.0183699
Ckap2	-0.0692055	1	0.0178546	1	0.0678143	1	0.0395125	1	1	0.013994
Ckap2l	-0.121858	1	0.0989525	1	0.0631833	1	-0.00883172	1	1	0.00786141
Ckap4	-0.161971	1	-0.117565	1	-0.153415	1	-0.123226	1	1	-0.139044
Ckap5	-0.0686411	1	0.0597749	1	0.00667643	1	0.0521163	1	1	0.0124816
Ckb	0.00276078	1	-0.0810773	1	-0.0353214	1	-0.0143521	1	1	-0.0319975
Cklf	0.000873742	1	-0.0468615	1	0.0550892	1	0.0100644	1	1	0.00479146
Cks1b	-0.250542	1	-0.193258	1	-0.0714104	1	-0.279887	1	1	-0.198774
Cks1brt	-0.00551442	1	-0.0130788	1	-0.0075119	1	-0.0139407	1	1	-0.0100115
Cks2	-0.331929	1	-0.0750238	1	0.156904	1	-0.111475	1	1	-0.0903811
Clasp1	0.0365464	1	0.0469475	1	0.0572399	1	-0.00540832	1	1	0.0338314
Clasp2	-0.00541271	1	0.00656311	1	-0.00328035	1	-0.0150677	1	1	-0.0042994
Clasrp	0.00987535	1	-0.038354	1	0.0450182	1	0.000278216	1	1	0.00420445
Clca3a1	0.0155771	1	0.00460827	1	0.0267838	1	-0.019304	1	1	0.0069163
Clcc1	-0.0344659	1	0.0747264	1	-0.00521427	1	-0.0478475	1	1	-0.00320033
Clcf1	0.0329593	1	-0.070191	1	-0.0431777	1	-0.0787218	1	1	-0.0397828
Clcn2	0.0143462	1	0.0560297	1	0.0122934	1	0.00877082	1	1	0.02286
Clcn3	0.132234	1	0.0345649	1	0.0328164	1	0.083701	1	1	0.0708291
Clcn4	0.0880946	1	0.072387	1	0.0259058	1	0.000763227	1	1	0.0467877
Clcn5	-0.0148696	1	0.011864	1	-0.000534444	1	-0.0625893	1	1	-0.0165323
Clcn6	0.00636584	1	-0.0287317	1	0.0118998	1	0.00246301	1	1	-0.00200077
Clcn7	0.0152542	1	-0.00596049	1	0.0158302	1	0.035699	1	1	0.0152057
Cldn12	-0.00337108	1	0.00328065	1	0.0153368	1	-0.01231	1	1	0.000734103
Cldn23	0.0523431	1	-0.00401825	1	0.00926888	1	0.0423031	1	1	0.0249742
Cldn3	0.518183	7.15509e-07	0.295689	1	0.440126	7.15883e-16	0.335726	0.657516	7.2131e-18	0.397431
Cldn4	0.801648	9.08554e-05	0.519162	1	0.624981	7.78916e-15	0.612229	0.106692	1.15076e-15	0.639505
Cldn7	1.14022	5.89746e-30	0.830117	1.65046e-07	0.956439	6.76818e-64	0.748713	2.18934e-12	4.04359e-105	0.918871
Cldnd1	-0.0534678	1	-0.0202518	1	-0.0122517	1	0.00749253	1	1	-0.0196197
Clec11a	0.0110615	1	-0.0094562	1	0.0086784	1	-0.0361111	1	1	-0.00645685
Clec16a	-0.000643386	1	-0.0139462	1	0.00280594	1	-0.0161818	1	1	-0.00699137
Clec2d	0.0317908	1	-0.0261268	1	0.0322776	1	0.143052	1	1	0.0452484
Clec4d	-0.0138323	1	-0.0730813	1	-0.00642805	1	0.0106625	1	1	-0.0206698
Clec4e	-0.0183379	1	-0.0582487	1	-0.00653019	1	-0.0130689	1	1	-0.0240464
Clic1	0.0248525	1	0.0240215	1	-0.071169	1	0.0341786	1	1	0.0029709
Clic4	-0.0653652	1	-0.179601	1	-0.0313223	1	-0.079798	1	1	-0.0890216
Clint1	0.0827692	1	-0.155869	1	0.0244231	1	8.05312e-05	1	1	-0.0121491
Clip1	-0.0428351	1	-0.106557	1	-0.0494618	1	0.0810755	1	1	-0.0294447
Clip2	-0.0194775	1	-0.0484901	1	0.0016527	1	0.0326519	1	1	-0.00841575
Clip4	0.0313901	1	0.13675	1	-0.0143502	1	-0.0501731	1	1	0.0259041
Clk1	-0.116688	1	-0.053983	1	-0.0701745	1	0.0525777	1	1	-0.0470669
Clk2	-0.0136387	1	-0.0296093	1	-0.0120606	1	0.0422406	1	1	-0.003267
Clk3	0.0571855	1	0.0139591	1	0.000502965	1	-0.0513375	1	1	0.00507751
Clk4	0.035599	1	-0.223594	1	0.00537547	1	0.0501547	1	1	-0.0331161
Cln3	0.0519208	1	-0.122209	1	0.047158	1	0.0322714	1	1	0.0022853
Cln5	-0.0461566	1	-0.0296561	1	-0.0202426	1	-0.0228919	1	1	-0.0297368
Cln6	0.000123897	1	-0.0503544	1	0.0112785	1	0.0822119	1	1	0.010815
Cln8	0.0218088	1	-0.0557327	1	0.0273083	1	-0.00868159	1	1	-0.00382429
Clns1a	0.0878404	1	-0.0243257	1	0.0765838	1	0.0531006	1	1	0.0482998
Clock	-0.0371488	1	0.0833594	1	0.0127342	1	-0.113544	1	1	-0.0136497
Clp1	-0.0241144	1	0.0280262	1	0.0111053	1	-0.000221404	1	1	0.00369892
Clpb	0.0295804	1	-0.0180625	1	0.015783	1	0.159325	1	1	0.0466565
Clpp	0.0298353	1	0.0752155	1	0.0273537	1	0.00248663	1	1	0.0337228
Clptm1	0.00235046	1	-0.010512	1	0.0132596	1	0.00866516	1	1	0.0034408
Clptm1l	0.0195938	1	0.165444	1	0.03708	1	-0.0540489	1	1	0.0420173
Clpx	-0.0669078	1	-0.0442606	1	-0.0303347	1	0.121819	1	1	-0.00492104
Clspn	0.00469454	1	0.0139253	1	0.072832	1	-0.0178707	1	1	0.0183953
Clstn1	0.104422	1	0.0312919	1	0.0743217	1	0.0312171	1	1	0.0603132
Clta	0.00628111	1	0.0829075	1	-0.077561	1	0.0253247	1	1	0.00923807
Cltb	0.0439993	1	-0.108437	1	0.0282479	1	-0.0896009	1	1	-0.0314477
Cltc	0.0295505	1	-0.0569734	1	0.0335779	1	-0.0521696	1	1	-0.0115037
Clu	-0.426395	0.557706	-0.515673	1	-0.550671	0.00338108	-0.0763331	1	0.128417	-0.392268
Cluap1	0.0168427	1	0.0266889	1	0.0224499	1	0.0444458	1	1	0.0276068
Cluh	0.0264879	1	0.0415254	1	0.0426736	1	0.00227524	1	1	0.0282405
Clybl	-0.00679725	1	-0.0218608	1	-0.0240916	1	-0.0250949	1	1	-0.0194611
Cmas	0.0335597	1	-0.0528095	1	0.0138632	1	0.0492729	1	1	0.0109716
Cmc1	0.014948	1	-0.114779	1	0.0224196	1	0.0296607	1	1	-0.0119377
Cmc2	0.0761584	1	0.0904206	1	0.0356877	1	0.0138213	1	1	0.054022
Cmc4	-0.00652289	1	0.0090841	1	0.0101466	1	-0.000307221	1	1	0.00310015
Cmip	0.116622	1	-0.0114182	1	0.0276636	1	0.0353227	1	1	0.0420476
Cmpk1	-0.0120909	1	0.218989	1	0.0286702	1	0.063488	1	1	0.0747641
Cmpk2	0.00920977	1	0.021123	1	0.00842794	1	0.0444356	1	1	0.0207991
Cmss1	-0.0275901	1	0.073044	1	0.030102	1	0.0198962	1	1	0.023863
Cmtm3	0.0355302	1	0.0560554	1	0.0105018	1	-0.0805685	1	1	0.00537974
Cmtm4	0.117094	0.173606	0.00564803	1	0.0840815	1	-0.0142002	1	0.89904	0.0481558
Cmtm6	0.0229252	1	0.0530073	1	0.0593281	1	0.0177052	1	1	0.0382414
Cmtm7	0.00505803	1	0.0301259	1	-0.0490731	1	-0.0672498	1	1	-0.0202847
Cmtr1	-0.0167075	1	-0.0268001	1	0.00409996	1	0.00866915	1	1	-0.00768464
Cmtr2	0.0422942	1	0.0279106	1	0.0227613	1	0.0137027	1	1	0.0266672
Cnbp	0.110565	1	0.161115	1	0.0880346	1	0.0228426	1	1	0.0956394
Cndp2	-0.00188302	1	0.119237	1	0.0593378	1	0.00642507	1	1	0.0457792
Cnep1r1	-0.00703549	1	0.0347677	1	0.0916105	1	-0.0306387	1	1	0.022176
Cnih1	-0.0672586	1	-0.103522	1	-0.144399	0.014085	-0.0353806	1	0.383908	-0.0876401
Cnih4	-0.124875	1	0.113298	1	0.0625571	1	0.104808	1	1	0.0389471
Cnksr1	0.0207899	1	0.00275008	1	0.0334881	1	-0.00693503	1	1	0.0125233
Cnksr3	-0.0070991	1	-0.00389047	1	-0.00466537	1	-0.0266097	1	1	-0.0105662
Cnn2	-0.102238	1	-0.0349612	1	-0.0298739	1	0.0472202	1	1	-0.0299632
Cnn3	-0.201906	1	-0.0998635	1	-0.153681	0.491137	-0.0355255	1	0.993928	-0.122744
Cnnm2	0.0131589	1	0.0782127	1	-0.0110017	1	0.0108768	1	1	0.0228117
Cnnm3	-0.00175391	1	0.00449686	1	0.0356179	1	0.0394928	1	1	0.0194634
Cnnm4	-0.0747106	1	-0.121549	1	-0.0152591	1	-0.0424324	1	1	-0.0634877
Cnot1	0.0975195	1	-0.0382764	1	0.0246548	1	0.0890667	1	1	0.0432411
Cnot10	0.0169402	1	-0.0543339	1	0.028165	1	-0.0583049	1	1	-0.0168834
Cnot11	-0.0317254	1	-0.0774733	1	0.00799644	1	0.0136713	1	1	-0.0218827
Cnot2	-0.0293633	1	0.0410576	1	0.0300142	1	-0.0395764	1	1	0.000533019
Cnot3	0.119632	1	0.0180376	1	0.0123767	1	0.0772414	1	1	0.0568219
Cnot4	0.00415903	1	-0.0547446	1	-0.00493969	1	-0.0188809	1	1	-0.0186015
Cnot6	0.0384391	1	-0.0536386	1	0.042252	1	0.187636	1	1	0.0536722
Cnot6l	0.00805818	1	-0.0574417	1	0.00020373	1	0.0642266	1	1	0.00376172
Cnot7	0.079922	1	-0.0183308	1	0.0449585	1	0.0569695	1	1	0.0408798
Cnot8	0.00185177	1	-0.0114221	1	0.0259381	1	-0.0331353	1	1	-0.00419187
Cnot9	0.0388033	1	0.0617272	1	0.0237059	1	0.0610138	1	1	0.0463126
Cnp	0.106633	1	0.0484916	1	0.113423	0.0012754	0.104345	1	0.10102	0.0932231
Cnppd1	-0.050139	1	0.0273997	1	0.0155946	1	-0.0377514	1	1	-0.011224
Cnpy2	-0.0310509	1	0.00911546	1	-0.0161532	1	0.0572202	1	1	0.00478289
Cnpy3	0.0606333	1	0.065087	1	0.0521175	1	0.0531671	1	1	0.0577512
Cnpy4	-0.0463601	1	-0.0699931	1	-0.022548	1	-0.0401419	1	1	-0.0447608
Cnst	0.0566307	1	0.0195402	1	0.00774244	1	-0.00424273	1	1	0.0199177
Cntrl	0.0128668	1	-0.0651878	1	0.037108	1	0.0356098	1	1	0.00509919
Cntrob	-0.000160159	1	-0.00191397	1	0.0245416	1	-0.0110992	1	1	0.00284207
Coa3	0.138688	1	0.0458194	1	0.0622686	1	0.153329	1	1	0.100026
Coa4	0.0083154	1	-0.0706361	1	0.0107275	1	0.00481629	1	1	-0.0116942
Coa5	0.0435571	1	-0.0219674	1	0.013825	1	0.00642199	1	1	0.0104592
Coa6	-0.027812	1	0.18648	1	0.0266893	1	0.0123718	1	1	0.0494322
Coa7	0.0358108	1	-0.0264007	1	0.0322121	1	0.017037	1	1	0.0146648
Coasy	0.0523075	1	0.18752	1	0.0860391	1	0.0743686	1	1	0.100059
Cobll1	0.0188655	1	-0.042775	1	-0.0164263	1	-0.0278482	1	1	-0.017046
Cog1	0.00428535	1	0.075401	1	0.00883687	1	0.00350453	1	1	0.0230069
Cog2	-0.020877	1	-0.00976201	1	-0.0120173	1	0.0729187	1	1	0.00756563
Cog3	-0.0221775	1	-0.0408961	1	-0.0130209	1	-0.0090878	1	1	-0.0212956
Cog4	0.0525725	1	0.0115527	1	-0.0039983	1	-0.0143042	1	1	0.0114557
Cog5	0.0179604	1	-0.027708	1	0.0242379	1	0.00109329	1	1	0.00389587
Cog6	-0.0774115	1	-0.0308269	1	-0.0453669	1	-0.00383509	1	1	-0.0393601
Cog7	0.0419859	1	0.0335875	1	0.0165798	1	0.0774209	1	1	0.0423935
Cog8	0.0181851	1	-0.0188502	1	-0.00599903	1	-0.0516307	1	1	-0.0145737
Coil	-0.011803	1	-0.009219	1	-0.00161977	1	0.00341456	1	1	-0.0048068
Col12a1	-0.048828	1	-0.110415	1	-0.0126126	1	0.00815549	1	1	-0.0409249
Col16a1	-0.0251713	1	-0.043857	1	-0.0823559	1	0.0156408	1	1	-0.0339359
Col18a1	0.0530977	1	-0.0407683	1	-0.0299744	1	0.0187206	1	1	0.00026892
Col1a1	-0.0401672	1	0.0261771	1	-0.029636	1	0.145977	1	1	0.0255876
Col1a2	-0.0674912	1	0.177638	1	-0.0276743	1	-0.0922876	1	1	-0.00245377
Col3a1	-0.0811327	1	0.206481	1	-0.00839893	1	0.0739389	1	1	0.0477221
Col4a1	0.133882	1	-0.12137	1	0.0486563	1	-0.00997612	1	1	0.0127983
Col4a2	0.0381841	1	0.179648	1	-0.0214095	1	-0.0735252	1	1	0.0307245
Col4a3bp	-0.0384674	1	0.151402	1	-0.0140165	1	0.0422625	1	1	0.0352952
Col4a5	0.0144642	1	-0.0145168	1	0.00601719	1	0.0113942	1	1	0.0043397
Col5a1	-0.130807	0.126925	-0.0580826	1	-0.147424	4.51836e-07	-0.108362	1	5.32963e-05	-0.111169
Col5a2	-0.0386722	1	0.233462	1	-0.0153151	1	0.011627	1	1	0.0477754
Col6a1	0.232959	1	-0.0493269	1	-0.269469	0.18029	-0.204819	1	0.904827	-0.0726641
Col6a2	-0.00973206	1	-0.00998294	1	-0.0845146	1	-0.0929535	1	1	-0.0492958
Col7a1	-0.0521776	1	0.0135306	1	-0.0502622	1	-0.054474	1	1	-0.0358458
Col8a1	0.0133214	1	-0.163968	1	0.0127142	1	-0.0739508	1	1	-0.0529709
Colgalt1	0.0829287	1	-0.0783317	1	-0.0693426	1	-0.0332068	1	1	-0.0244881
Commd1	0.00494106	1	-0.0156444	1	0.00714854	1	0.0686096	1	1	0.0162637
Commd10	0.0207018	1	-0.00433927	1	0.0310884	1	0.0398937	1	1	0.0218362
Commd2	-0.00241793	1	0.0504534	1	-0.0743474	1	0.0874056	1	1	0.0152734
Commd3	-0.0837707	1	0.0756129	1	-0.148905	0.00124773	-0.176314	1	0.0996486	-0.0833441
Commd4	0.0456949	1	0.0141221	1	-0.0814723	0.673829	0.0556337	1	0.99926	0.00849461
Commd6	-0.07276	1	-0.131019	1	-0.0423404	1	-0.0169494	1	1	-0.0657672
Commd7	-0.0224081	1	-0.093223	1	0.190837	1	-0.0278261	1	1	0.0118449
Commd8	0.142941	1	0.0389775	1	0.0568421	1	-0.0059976	1	1	0.0581906
Commd9	-0.00725091	1	0.0317018	1	0.0315844	1	0.0888314	1	1	0.0362167
Comt	-0.0454429	1	0.0529161	1	0.00401925	1	0.105614	1	1	0.0292766
Comtd1	-0.0178507	1	-0.0438641	1	-0.0412953	1	-0.05777	1	1	-0.040195
Cop1	0.0153522	1	-0.0203884	1	0.0237896	1	0.0570705	1	1	0.018956
Copa	-0.124012	1	0.0632976	1	-0.00941956	1	0.128406	1	1	0.0145679
Copb1	0.0327565	1	-0.10344	1	0.00778169	1	0.0184976	1	1	-0.011101
Copb2	-0.0253513	1	-0.00257785	1	-0.0415483	1	-0.0661585	1	1	-0.033909
Cope	0.0787141	1	-0.0824633	1	0.00950612	1	0.139346	1	1	0.0362758
Copg1	-0.029015	1	0.00604292	1	-0.0295262	1	-0.0504376	1	1	-0.025734
Copg2	0.075798	1	0.010075	1	0.00940719	1	0.027457	1	1	0.0306843
Coprs	0.000732326	1	0.174563	1	0.0335962	1	0.00518713	1	1	0.0535196
Cops2	0.0546377	1	0.168065	1	-0.0329926	1	0.0993894	1	1	0.072275
Cops3	0.0720962	1	-0.037798	1	-0.00312703	1	0.0834437	1	1	0.0286537
Cops4	0.0314256	1	-0.0350345	1	-0.0401155	1	-0.00877957	1	1	-0.013126
Cops5	-0.0460007	1	-0.00759707	1	0.0362719	1	0.020738	1	1	0.000853029
Cops6	-0.0255104	1	0.0340615	1	-0.00931836	1	0.144721	1	1	0.0359884
Cops7a	-0.0187435	1	-0.0806993	1	0.0307169	1	0.0554324	1	1	-0.00332335
Cops7b	-0.00111259	1	0.0828652	1	0.013133	1	0.0133303	1	1	0.027054
Cops8	-0.0302336	1	-0.0662042	1	0.0243416	1	0.00153826	1	1	-0.0176395
Cops9	-0.18471	0.123472	0.0713557	1	-0.0561015	1	-0.0724275	1	0.840202	-0.0604709
Copz1	-0.0385819	1	0.141778	1	-0.00969833	1	-0.0459094	1	1	0.0118971
Copz2	-0.0245773	1	-0.0479351	1	-0.0287369	0.0568834	-0.0296836	1	0.677055	-0.0327332
Coq10a	-0.000287983	1	0.0834269	1	0.0134249	1	0.00347306	1	1	0.0250092
Coq10b	-0.0586464	1	-0.0550128	1	0.0399876	1	-0.0255923	1	1	-0.024816
Coq2	0.0492833	1	-0.0229543	1	0.0352656	1	-0.0246022	1	1	0.00924809
Coq3	0.0133731	1	0.0520735	1	-0.00109223	1	0.104494	1	1	0.0422122
Coq4	0.035396	1	0.0347953	1	0.00369702	1	-0.0173643	1	1	0.014131
Coq5	-0.0188206	1	-0.0655394	1	0.0105946	1	0.03403	1	1	-0.00993383
[truncated: 8,449 more rows]

## Sheet: Clone523_FindMarkers_by_expt
gene	logFC.Veh.ExptC	adj.p.Veh.ExptC	logFC.Veh.ExptD	adj.p.Veh.ExptD	logFC.Veh.ExptA	adj.p.Veh.ExptA	fisher.combined.pvalue	mean.logFC
[truncated: 10,627 more rows]

[truncated: 3 more sheets: Clone537_FindMarkers_by_expt, Clone679_FindMarkers_by_expt, Clone684_FindMarkers_by_expt]
