# Supplementary material for: Clonal transcriptomics identifies mechanisms of chemoresistance and empowers rational design of combination therapies
Source: bioRxiv preprint, doi:10.1101/2021.12.09.471927, version 2 (2022-06-10)
Supplement: Supplementary Table 5 [file 471927_file07.xlsx]

## Sheet: Clone238_AUCell_by_expt
geneset	median.Veh_ExptC	enrichment.Veh_ExptC	adj.p.Veh_ExptC	median.Veh_ExptD	enrichment.Veh_ExptD	adj.p.Veh_ExptD	median.Veh_ExptA	enrichment.Veh_ExptA	adj.p.Veh_ExptA	fisher.combined.pvalue	mean.enrichment
ABBUD_LIF_SIGNALING_1_DN	0.0915222	-0.0330841	0.542792	0.0965482	0.040044	0.96293	0.0974581	0.0401045	0.385065	0.782545	0.0156882
ABBUD_LIF_SIGNALING_1_UP	0.103169	-0.131865	0.271923	0.118093	-0.0980469	0.781955	0.100453	-0.148134	0.340642	0.512142	-0.126015
ABE_INNER_EAR	0.256942	0.00756579	0.455442	0.292551	0.0669462	0.560971	0.258982	0.0217612	0.779444	0.7798	0.0320911
ABE_VEGFA_TARGETS_2HR	0.0600486	-0.0566523	0.216451	0.0480488	-0.177679	0.628559	0.0592056	0.041678	0.99895	0.677822	-0.0642178
ABE_VEGFA_TARGETS_30MIN	0.0961072	-0.124262	0.0460057	0.0704261	-0.385077	0.62446	0.0984018	-0.0608952	0.273002	0.138039	-0.190078
ABRAHAM_ALPC_VS_MULTIPLE_MYELOMA_UP	0.11949	-0.0224776	0.0622555	0.0878377	-0.17379	0.62446	0.123757	-0.00463673	0.899229	0.348777	-0.066968
ABRAMSON_INTERACT_WITH_AIRE	0.164773	-0.0796607	0.129393	0.131993	-0.0453703	0.985848	0.168766	-0.0138334	0.457968	0.459947	-0.0462882
ACEVEDO_LIVER_CANCER_DN	0.109595	-0.011674	0.419926	0.107759	-0.0355842	0.668993	0.107607	-0.0203398	0.761882	0.798328	-0.0225327
ACEVEDO_LIVER_CANCER_UP	0.121976	0.00283744	0.512579	0.124569	0.0463221	0.450607	0.121744	-0.0141113	0.425901	0.591004	0.0116828
ACEVEDO_LIVER_CANCER_WITH_H3K27ME3_DN	0.040358	-0.0823748	0.115589	0.0374755	-0.114256	0.599044	0.0424546	0.00149483	0.847458	0.461	-0.0650454
ACEVEDO_LIVER_CANCER_WITH_H3K27ME3_UP	0.0416629	-0.0395722	0.854803	0.0457096	0.02605	0.915581	0.0434766	-0.00706324	0.973949	0.997276	-0.0068618
ACEVEDO_LIVER_CANCER_WITH_H3K9ME3_DN	0.0320251	-0.0636345	0.175334	0.0285114	-0.14445	0.916873	0.0312063	-0.0735761	0.585651	0.579436	-0.0938868
ACEVEDO_LIVER_CANCER_WITH_H3K9ME3_UP	0.0186947	0.0808567	0.349081	0.0207156	0.143812	0.916873	0.0182556	0.0220678	0.592187	0.766912	0.0822454
ACEVEDO_LIVER_TUMOR_VS_NORMAL_ADJACENT_TISSUE_DN	0.0864617	0.0246066	0.876287	0.0783174	-0.0686222	0.818115	0.0864262	0.0399972	0.704847	0.967942	-0.00133948
ACEVEDO_LIVER_TUMOR_VS_NORMAL_ADJACENT_TISSUE_UP	0.159955	0.0255587	0.491022	0.156833	0.0192368	0.956156	0.157404	0.00472842	0.505155	0.823999	0.016508
ACEVEDO_METHYLATED_IN_LIVER_CANCER_DN	0.0434545	0.0344062	0.167554	0.0445355	0.0311249	0.991867	0.0444264	0.0496625	0.244352	0.379119	0.0383979
ACEVEDO_NORMAL_TISSUE_ADJACENT_TO_LIVER_TUMOR_DN	0.104117	0.0161835	0.45644	0.100092	-0.0287123	0.746334	0.103609	0.0190407	0.570031	0.773247	0.00217061
ACEVEDO_NORMAL_TISSUE_ADJACENT_TO_LIVER_TUMOR_UP	0.115913	0.01338	0.262176	0.120427	0.110606	0.492361	0.122603	0.0564051	0.00843434	0.0338574	0.0601303
ACOSTA_PROLIFERATION_INDEPENDENT_MYC_TARGETS_DN	0.081669	-0.0279428	0.209641	0.0825946	-0.0247061	0.851893	0.0862936	0.0480686	0.196804	0.349838	-0.0015268
ACOSTA_PROLIFERATION_INDEPENDENT_MYC_TARGETS_UP	0.0397524	-0.093545	0.0286354	0.0407521	-0.0481779	0.914552	0.0404509	-0.0356771	0.501165	0.193221	-0.0591333
ADDYA_ERYTHROID_DIFFERENTIATION_BY_HEMIN	0.183983	-0.0614273	0.0516381	0.164321	-0.143844	0.689164	0.185843	-0.0415399	0.674959	0.280579	-0.0822705
AFFAR_YY1_TARGETS_DN	0.075345	0.0697856	0.280603	0.0615071	0.0608418	0.92906	0.0694954	0.0278136	0.448655	0.637254	0.0528137
AFFAR_YY1_TARGETS_UP	0.0477437	-0.0259539	0.710781	0.0464628	-0.105473	0.689164	0.0505179	0.0945094	0.445951	0.803503	-0.0123058
AGUIRRE_PANCREATIC_CANCER_COPY_NUMBER_DN	0.0908748	-0.0484236	0.000530078	0.0914691	0.0125889	0.996559	0.0899232	-0.0366283	0.0383582	0.00142244	-0.0241543
AGUIRRE_PANCREATIC_CANCER_COPY_NUMBER_UP	0.0953014	-0.0245333	0.432832	0.0949698	0.029452	0.753537	0.0947879	-0.00988121	0.940946	0.883527	-0.00165415
AIGNER_ZEB1_TARGETS	0.08366	0.0405382	0.346403	0.0862519	0.0241699	0.901015	0.0962195	0.194542	0.0204689	0.12024	0.0864167
AIYAR_COBRA1_TARGETS_DN	0.149999	-0.024025	0.548339	0.139486	0.0273734	0.954779	0.158198	0.0554308	0.563164	0.874831	0.019593
AIYAR_COBRA1_TARGETS_UP	0.158254	0.0880308	0.00903041	0.161534	0.0900519	0.513941	0.159068	0.0878065	0.023611	0.00566485	0.0886297
AKL_HTLV1_INFECTION_DN	0.107838	0.101811	0.00494935	0.110524	0.119031	0.826428	0.107606	0.0441924	0.238254	0.0311562	0.0883449
AKL_HTLV1_INFECTION_UP	0.28833	-0.00117804	0.79751	0.276702	0.0240493	0.904361	0.29697	0.0271739	0.372549	0.853836	0.0166817
ALCALA_APOPTOSIS	0.212232	-0.0055821	0.476998	0.204473	-0.03321	0.864725	0.2111	-0.00122427	0.897521	0.920853	-0.0133388
ALCALAY_AML_BY_NPM1_LOCALIZATION_DN	0.0741875	0.126466	0.00841982	0.0680176	0.0796043	0.86275	0.0642951	-0.017527	0.727823	0.105658	0.0628478
ALCALAY_AML_BY_NPM1_LOCALIZATION_UP	0.045911	-0.00310954	0.979352	0.0477705	0.00719807	0.969924	0.0484498	0.0235363	0.62029	0.98332	0.00920829
ALFANO_MYC_TARGETS	0.115819	-0.0156464	0.261048	0.112981	-0.0200617	0.928654	0.118284	0.0165962	0.578558	0.686342	-0.00637064
ALONSO_METASTASIS_EMT_UP	0.116382	0.00557839	0.873583	0.113109	0.00234014	0.991867	0.110671	0.00311003	0.741186	0.989578	0.00367619
ALONSO_METASTASIS_UP	0.196672	-0.00457798	0.469328	0.199845	0.0308986	0.887736	0.196797	0.0114356	0.676687	0.864851	0.0125854
ALTEMEIER_RESPONSE_TO_LPS_WITH_MECHANICAL_VENTILATION	0.0524528	-0.158296	0.028307	0.0568075	-0.122945	0.548017	0.0480924	-0.161459	0.234143	0.0813553	-0.147567
AMBROSINI_FLAVOPIRIDOL_TREATMENT_TP53	0.0277707	0.0199199	0.786483	0.0281269	-0.10849	0.887941	0.026593	-0.0457499	0.342802	0.826291	-0.0447735
AMIT_EGF_RESPONSE_120_HELA	0.106668	-0.155574	0.00361836	0.107745	-0.123377	0.77435	0.114796	-0.0353952	0.859999	0.0607184	-0.104782
AMIT_EGF_RESPONSE_120_MCF10A	0.123916	-0.0475501	0.137257	0.107527	-0.121755	0.84238	0.125942	-0.00492656	0.741231	0.554923	-0.0580771
AMIT_EGF_RESPONSE_240_HELA	0.114926	-0.064434	0.00680523	0.116426	0.0445955	0.992514	0.122208	0.0289162	0.960864	0.121529	0.00302591
AMIT_EGF_RESPONSE_40_HELA	0.243778	-0.119787	0.00119634	0.23225	-0.113673	0.513941	0.232555	-0.162265	0.0879471	0.00319535	-0.131908
AMIT_EGF_RESPONSE_480_HELA	0.139493	0.0620345	0.306489	0.126723	-0.0431684	0.86275	0.141292	0.0743852	0.163107	0.391808	0.0310838
AMIT_EGF_RESPONSE_480_MCF10A	0.0552346	-0.0399236	0.574657	0.0529463	-0.100965	0.760904	0.0666515	0.201151	0.0906625	0.374124	0.0200875
AMIT_EGF_RESPONSE_60_HELA	0.127355	-0.225121	0.000550832	0.130477	-0.105458	0.92401	0.137785	-0.074557	0.438575	0.00998903	-0.135045
AMIT_EGF_RESPONSE_60_MCF10A	0.213003	-0.0795114	0.0113313	0.220787	0.00775102	0.916873	0.207933	-0.0681015	0.05109	0.0196264	-0.0466206
AMIT_SERUM_RESPONSE_120_MCF10A	0.0734673	-0.325306	0.000214313	0.082781	-0.210723	0.732612	0.085319	-0.0139189	0.683707	0.00557178	-0.183316
AMIT_SERUM_RESPONSE_240_MCF10A	0.0718139	0.060304	0.363833	0.0685386	0.0596449	0.950047	0.076709	0.105347	0.0121896	0.0902814	0.0750986
AMIT_SERUM_RESPONSE_40_MCF10A	0.267445	-0.117827	0.027284	0.2301	-0.216776	0.432425	0.258797	-0.144598	0.118678	0.0408313	-0.159734
AMIT_SERUM_RESPONSE_480_MCF10A	0.0521911	-0.207708	0.00439711	0.0498563	-0.166688	0.513941	0.053137	-0.116427	0.0296161	0.00380193	-0.163608
AMIT_SERUM_RESPONSE_60_MCF10A	0.157178	-0.124956	0.0203041	0.167055	0.000432495	0.929668	0.161835	-0.0460704	0.227014	0.0913505	-0.0568647
AMUNDSON_RESPONSE_TO_ARSENITE	0.0975048	-0.0458976	0.0952198	0.0969707	-0.0351025	0.884332	0.0974898	-0.04461	0.288905	0.282711	-0.04187
ANASTASSIOU_MULTICANCER_INVASIVENESS_SIGNATURE	0.048398	0.0994327	0.0517808	0.0539375	0.162664	0.471483	0.0397078	-0.0403002	0.71733	0.231608	0.0739323
ANDERSEN_CHOLANGIOCARCINOMA_CLASS1	0.0421952	-0.00203149	0.69168	0.0447717	0.000212897	0.853158	0.0416997	0.0356353	0.883921	0.971566	0.0112722
ANDERSEN_CHOLANGIOCARCINOMA_CLASS2	0.0507518	0.213704	0.000103481	0.0408012	0.0401181	0.897124	0.0572255	0.412618	4.61534e-09	1.86379e-10	0.222147
ANDERSEN_LIVER_CANCER_KRT19_DN	0.0333355	-0.0576477	0.0826392	0.0341189	-0.0452543	0.702002	0.0329677	-0.0533417	0.199766	0.178392	-0.0520812
ANDERSEN_LIVER_CANCER_KRT19_UP	0.425187	-0.0107697	0.792928	0.429464	0.0364362	0.736394	0.426613	-0.00054488	0.741231	0.947042	0.00837386
APPEL_IMATINIB_RESPONSE	0.104127	0.00155379	0.954478	0.103477	-0.161846	0.858752	0.113363	0.131014	0.0318771	0.294905	-0.00975946
APPIERTO_RESPONSE_TO_FENRETINIDE_DN	0.203869	0.0151251	0.835935	0.203268	0.00080423	0.942489	0.179854	-0.0661226	0.42946	0.903684	-0.0167311
APPIERTO_RESPONSE_TO_FENRETINIDE_UP	0.153634	-0.0120853	0.448765	0.153345	0.073976	0.62518	0.163953	0.0141532	0.516126	0.694973	0.025348
APRELIKOVA_BRCA1_TARGETS	0.274644	-0.0153146	0.523111	0.259389	0.0202011	0.99909	0.279883	0.0107644	0.584673	0.8826	0.00521695
ASGHARZADEH_NEUROBLASTOMA_POOR_SURVIVAL_DN	0.0513257	-0.148027	0.0312793	0.0463818	-0.0784952	0.969924	0.0576126	-0.0235806	0.629137	0.244211	-0.0833677
ASTIER_INTEGRIN_SIGNALING	0.0849667	-0.0677582	0.0484919	0.0823955	-0.154429	0.611254	0.0849735	-0.0692787	0.156385	0.0964819	-0.0971553
ASTON_MAJOR_DEPRESSIVE_DISORDER_DN	0.044181	-0.127593	0.000107302	0.0446069	-0.0431132	0.863839	0.0490819	0.0104968	0.847458	0.00432976	-0.0534032
ASTON_MAJOR_DEPRESSIVE_DISORDER_UP	0.0801934	0.0499208	0.227957	0.0918003	0.195171	0.334333	0.0737539	-0.108801	0.343584	0.295286	0.0454302
AUNG_GASTRIC_CANCER	0.164778	-0.0125449	0.113958	0.151359	-0.0721647	0.92906	0.168014	0.0144757	0.925086	0.58985	-0.0234113
AZARE_NEOPLASTIC_TRANSFORMATION_BY_STAT3_UP	0.109654	0.0243218	0.854803	0.103134	0.0470822	0.85348	0.115751	0.0421944	0.497193	0.917088	0.0378662
AZARE_STAT3_TARGETS	0.139384	-0.0256555	0.285657	0.122842	-0.0619902	0.864349	0.140227	-0.0735743	0.75735	0.763369	-0.05374
BACOLOD_RESISTANCE_TO_ALKYLATING_AGENTS_DN	0.11915	-0.0309778	0.451755	0.123132	0.0428265	0.92906	0.121149	-0.0162509	0.626269	0.848703	-0.0014674
BAE_BRCA1_TARGETS_DN	0.139237	-0.0178527	0.519893	0.132302	0.0227129	0.991867	0.142774	0.0106908	0.725209	0.922691	0.00518367
BAE_BRCA1_TARGETS_UP	0.217237	-0.0301908	0.112355	0.219231	0.0138847	0.981018	0.224006	0.0275487	0.300892	0.338533	0.00374755
BAELDE_DIABETIC_NEPHROPATHY_DN	0.141571	0.00976018	0.742827	0.140641	0.0342329	0.969924	0.144167	0.0131376	0.770805	0.978039	0.0190436
BAELDE_DIABETIC_NEPHROPATHY_UP	0.0993489	0.0229071	0.451755	0.100909	0.0502414	0.70573	0.0992233	0.048929	0.212403	0.495486	0.0406925
BAKKER_FOXO3_TARGETS_DN	0.0618924	0.0314662	0.430658	0.0640007	0.0701148	0.451646	0.0646098	0.0529015	0.175372	0.343976	0.0514941
BAKKER_FOXO3_TARGETS_UP	0.0763663	-0.010975	0.536013	0.0767231	-0.0405775	0.865019	0.0772102	0.0139118	0.78392	0.917469	-0.0125469
BALDWIN_PRKCI_TARGETS_UP	0.100652	-0.0787437	0.00371479	0.108684	-0.0401148	0.948413	0.103976	-0.0400978	0.531435	0.0505592	-0.0529854
BANDRES_RESPONSE_TO_CARMUSTIN_MGMT_24HR_DN	0.0916031	-0.078386	0.052577	0.0878248	-0.0644057	0.669949	0.100033	0.0534288	0.259461	0.152785	-0.0297876
BANDRES_RESPONSE_TO_CARMUSTIN_MGMT_48HR_DN	0.0944031	-0.0227888	0.163245	0.0930495	-0.0225685	0.598862	0.0929665	-0.00403215	0.996471	0.588427	-0.0164632
BANDRES_RESPONSE_TO_CARMUSTIN_WITHOUT_MGMT_48HR_DN	0.121096	-0.0214277	0.893675	0.117961	-0.0287879	0.865019	0.125967	0.0188145	0.452253	0.910096	-0.010467
BARIS_THYROID_CANCER_DN	0.144741	0.0144226	0.947486	0.133809	-0.0340751	0.864725	0.155418	0.0496929	0.252999	0.790144	0.0100135
BARIS_THYROID_CANCER_UP	0.178351	-0.0189182	0.350704	0.162652	-0.122967	0.908558	0.161496	-0.0784642	0.410493	0.667446	-0.0734496
BARRIER_CANCER_RELAPSE_NORMAL_SAMPLE_DN	0.0852855	-0.168218	0.0153978	0.0826403	-0.171555	0.718187	0.0915062	-0.0172149	0.821062	0.152128	-0.118996
BARRIER_CANCER_RELAPSE_NORMAL_SAMPLE_UP	0.0305915	-0.012929	0.956176	0.0316691	0.0550353	0.998018	0.0314416	-0.0153015	0.928058	0.999727	0.00893496
BARRIER_COLON_CANCER_RECURRENCE_UP	0.133445	0.132141	0.00268277	0.115346	-0.0294462	0.969924	0.117763	-0.0469618	0.584813	0.0434216	0.0185776
BASAKI_YBX1_TARGETS_DN	0.0926486	-0.0538486	0.0831791	0.0975544	0.00502413	0.991867	0.0998455	0.010958	0.927105	0.525831	-0.0126222
BASAKI_YBX1_TARGETS_UP	0.0933112	0.179706	0.108982	0.0734193	-0.0153779	0.982217	0.0774496	0.0199421	0.728031	0.530563	0.0614234
BASSO_B_LYMPHOCYTE_NETWORK	0.205968	0.0248184	0.642679	0.181082	-0.075603	0.950047	0.203154	0.00263752	0.984937	0.984957	-0.016049
BASSO_CD40_SIGNALING_DN	0.0449854	-0.00864824	0.629175	0.0458076	-0.0675633	0.84289	0.0482636	0.0911057	0.437244	0.81844	0.00496473
BASSO_CD40_SIGNALING_UP	0.110521	-0.0640523	0.258811	0.106431	-0.0811618	0.770694	0.105854	-0.0358244	0.87228	0.744298	-0.0603462
BASSO_HAIRY_CELL_LEUKEMIA_UP	0.144196	0.0195072	0.863374	0.143449	-0.0304689	0.920584	0.157719	0.0739589	0.118653	0.579876	0.0209991
BAUS_TFF2_TARGETS_UP	0.114727	0.0458911	0.266672	0.101305	-0.138882	0.594192	0.0966475	-0.172147	0.022364	0.0799525	-0.0883796
BECKER_TAMOXIFEN_RESISTANCE_DN	0.115297	-0.0644903	0.00775341	0.118293	0.0385918	0.951427	0.124106	-0.00508979	0.984098	0.131073	-0.0103294
BECKER_TAMOXIFEN_RESISTANCE_UP	0.133057	-0.0502202	0.519893	0.136655	-0.0683623	0.865019	0.129325	-0.0310128	0.763268	0.906524	-0.0498651
BEGUM_TARGETS_OF_PAX3_FOXO1_FUSION_DN	0.0684691	0.0493931	0.869142	0.0588374	-0.154746	0.680371	0.0711956	0.124067	0.083431	0.421154	0.00623788
BEGUM_TARGETS_OF_PAX3_FOXO1_FUSION_UP	0.0760301	0.0175509	0.941639	0.0820127	0.0684596	0.806778	0.0810522	0.0394911	0.883727	0.992157	0.0418339
BEIER_GLIOMA_STEM_CELL_DN	0.120697	0.00892445	0.869996	0.114527	-0.0624785	0.938843	0.106395	-0.146755	0.0958002	0.531595	-0.0667698
BEIER_GLIOMA_STEM_CELL_UP	0.0116218	0.249236	0.0557147	0.0117904	0.612294	0.916873	0.0135289	0.130442	0.463199	0.278079	0.330658
BENITEZ_GBM_PROTEASOME_INHIBITION_RESPONSE	0.109162	-0.0920869	0.000219829	0.110455	-0.148912	0.305541	0.114009	-0.040971	0.250626	0.00121886	-0.09399
BENNETT_SYSTEMIC_LUPUS_ERYTHEMATOSUS	0.046179	0.407587	0.0453628	0.032415	-0.307086	0.904361	0.0158264	-0.505142	0.632266	0.29364	-0.134881
BENPORATH_CYCLING_GENES	0.0985976	-0.0132452	0.518956	0.0892147	-0.0215382	0.969924	0.0960647	-0.0285509	0.712532	0.914967	-0.0211114
BENPORATH_EED_TARGETS	0.0384378	-0.0531574	0.254745	0.0370137	-0.118217	0.681759	0.0401267	0.00433693	0.627478	0.618261	-0.0556791
BENPORATH_ES_1	0.082024	0.0138097	0.886308	0.0694407	-0.0065875	0.808624	0.0791649	0.0104166	0.918147	0.991044	0.00587959
BENPORATH_ES_2	0.0196317	0.323056	0.135158	0.0168696	0.18355	0.845118	0.0126036	-0.0841526	0.951645	0.617583	0.140818
BENPORATH_ES_CORE_NINE_CORRELATED	0.102089	-0.0854808	0.00138833	0.095201	-0.113571	0.647388	0.0945977	-0.133666	0.0104889	0.000749722	-0.110906
BENPORATH_ES_WITH_H3K27ME3	0.0254131	-0.0476629	0.340901	0.0259215	-0.0581715	0.908558	0.0285327	0.0647571	0.345296	0.613234	-0.0136924
BENPORATH_MYC_MAX_TARGETS	0.181165	-0.00988659	0.351548	0.173758	-0.0245919	0.928654	0.180705	-0.00992198	0.583977	0.768445	-0.0148002
BENPORATH_MYC_TARGETS_WITH_EBOX	0.213096	-0.0273733	0.00291312	0.216476	-0.00158355	0.950047	0.210386	-0.0146977	0.106485	0.0124291	-0.0145515
BENPORATH_NANOG_TARGETS	0.118188	0.00366883	0.411388	0.119231	0.0311286	0.623079	0.117967	0.00654337	0.969404	0.835338	0.0137803
BENPORATH_NOS_TARGETS	0.0691414	-0.0552861	0.166673	0.0730974	0.0815352	0.85348	0.0752606	0.0282612	0.779444	0.622893	0.0181701
BENPORATH_OCT4_TARGETS	0.0776305	-0.0133606	0.590649	0.0780545	0.0521692	0.868792	0.080002	0.027604	0.893505	0.955439	0.0221375
BENPORATH_PRC2_TARGETS	0.0202149	-0.0319838	0.489334	0.0179592	-0.203384	0.784763	0.0239449	0.164271	0.065473	0.288287	-0.0236992
BENPORATH_PROLIFERATION	0.156552	0.120695	0.40236	0.123313	0.0268661	0.92401	0.139685	0.0531568	0.946521	0.911352	0.066906
BENPORATH_SOX2_TARGETS	0.116139	-0.0299345	0.00132338	0.114313	0.00392472	0.96293	0.11579	-0.0268844	0.22147	0.0120143	-0.0176314
BENPORATH_SUZ12_TARGETS	0.0293521	-0.0146204	0.499139	0.0294441	-0.086563	0.748267	0.0328878	0.100592	0.170889	0.481068	-0.000197031
BERENJENO_ROCK_SIGNALING_NOT_VIA_RHOA_DN	0.192808	-0.0736082	0.0173788	0.181995	-0.0419274	0.793322	0.199042	-0.0675867	0.238112	0.0757444	-0.0610408
BERENJENO_ROCK_SIGNALING_NOT_VIA_RHOA_UP	0.0935991	-0.192594	0.0141009	0.108367	-0.0100882	0.885335	0.105526	-0.0328186	0.837997	0.166936	-0.0785002
BERENJENO_TRANSFORMED_BY_RHOA_DN	0.0974446	-0.031365	0.0968513	0.103715	-0.0417014	0.901015	0.0996135	-0.00950564	0.911458	0.535753	-0.027524
BERENJENO_TRANSFORMED_BY_RHOA_FOREVER_DN	0.164883	0.0241925	0.263199	0.175994	0.16373	0.868792	0.171312	0.084504	0.639277	0.697531	0.0908089
BERENJENO_TRANSFORMED_BY_RHOA_REVERSIBLY_DN	0.0758989	0.028618	0.723403	0.0840594	0.140506	0.647388	0.0709127	0.00183133	0.709433	0.900036	0.0569852
BERENJENO_TRANSFORMED_BY_RHOA_UP	0.159722	0.0178179	0.968137	0.136978	-0.020827	0.969924	0.151996	-0.021614	0.821715	0.997605	-0.00820769
BERNARD_PPAPDC1B_TARGETS_DN	0.0247308	-0.11015	0.335167	0.0257374	-0.0120907	0.969924	0.0280818	-0.0045748	0.841981	0.858111	-0.0422719
BERNARD_PPAPDC1B_TARGETS_UP	0.0885078	-0.0143505	0.676783	0.0904861	0.0392026	0.894589	0.0914604	0.00770445	0.817369	0.965436	0.0108522
BERTUCCI_INVASIVE_CARCINOMA_DUCTAL_VS_LOBULAR_DN	0.0380105	0.0827032	0.105861	0.0346471	-0.0859161	0.85348	0.034481	-0.00624094	0.926437	0.548833	-0.00315126
BERTUCCI_INVASIVE_CARCINOMA_DUCTAL_VS_LOBULAR_UP	0.104449	-0.0250085	0.329177	0.106244	0.0137482	0.992514	0.108291	-0.0185484	0.570936	0.762716	-0.00993623
BERTUCCI_MEDULLARY_VS_DUCTAL_BREAST_CANCER_DN	0.0427071	0.00396912	0.726267	0.0437378	-0.00930408	0.92401	0.0422769	-0.0569579	0.806876	0.975535	-0.0207643
BERTUCCI_MEDULLARY_VS_DUCTAL_BREAST_CANCER_UP	0.0742612	-0.0302146	0.45644	0.0665738	-0.122576	0.491748	0.0694126	-0.0665499	0.0504291	0.175695	-0.0731135
BHAT_ESR1_TARGETS_NOT_VIA_AKT1_DN	0.0253287	-0.168322	0.0162251	0.029393	-0.0130118	0.969924	0.0277909	-0.0202534	0.865211	0.197792	-0.0671956
BHAT_ESR1_TARGETS_NOT_VIA_AKT1_UP	0.0317801	-0.106854	0.00606201	0.0365304	-0.0377827	0.868792	0.0320655	-0.0905301	0.234704	0.0372221	-0.0783889
BHAT_ESR1_TARGETS_VIA_AKT1_DN	0.0230769	-0.104097	0.0460057	0.0272359	0.127322	0.990599	0.0226582	-0.0222941	0.972309	0.397598	0.000310163
BHAT_ESR1_TARGETS_VIA_AKT1_UP	0.0506839	-0.144968	2.33224e-06	0.0562186	-0.0510269	0.594192	0.0517757	-0.0853003	0.0278344	6.3173e-06	-0.0937652
BHATI_G2M_ARREST_BY_2METHOXYESTRADIOL_DN	0.12048	0.0523389	0.00615512	0.116474	0.0193373	0.793411	0.117933	0.0203957	0.176806	0.02844	0.0306906
BHATI_G2M_ARREST_BY_2METHOXYESTRADIOL_UP	0.122281	0.0354596	0.575764	0.113336	0.0193847	0.950047	0.11903	-0.020369	0.70084	0.927123	0.0114918
BHATTACHARYA_EMBRYONIC_STEM_CELL	0.266808	0.00387274	0.722422	0.237683	-0.0114845	0.969924	0.258959	-0.00573288	0.689531	0.962437	-0.0044482
BIDUS_METASTASIS_DN	0.0308661	-0.00807952	0.393755	0.0338644	-0.00288182	0.939632	0.0325453	0.0320504	0.981881	0.917371	0.00702969
BIDUS_METASTASIS_UP	0.119102	-0.00829915	0.344731	0.0972427	-0.0784013	0.961421	0.115817	-0.0168139	0.531435	0.747557	-0.0345048
BILANGES_RAPAMYCIN_SENSITIVE_GENES	0.209083	-0.0272932	0.0692236	0.217301	0.0334431	0.676822	0.206637	-0.00485212	0.893505	0.38549	0.000432591
BILANGES_RAPAMYCIN_SENSITIVE_VIA_TSC1_AND_TSC2	0.3713	-0.0191715	0.534923	0.358387	-0.0406348	0.966255	0.377909	0.0195413	0.521085	0.854386	-0.0134217
BILANGES_SERUM_AND_RAPAMYCIN_SENSITIVE_GENES	0.712999	-0.0103444	0.0911266	0.716709	-0.0166552	0.950047	0.710177	-0.0035402	0.770265	0.491723	-0.0101799
BILANGES_SERUM_RESPONSE_TRANSLATION	0.542562	-0.00739285	0.0110513	0.541522	-0.00641139	0.935611	0.523512	-0.0232542	0.0241452	0.0109105	-0.0123528
BILANGES_SERUM_SENSITIVE_GENES	0.135305	-0.0433553	0.00735977	0.13446	-0.000169036	0.951832	0.133751	-0.0480219	0.293894	0.0541808	-0.0305154
BILANGES_SERUM_SENSITIVE_VIA_TSC2	0.1554	-0.0851398	0.0571659	0.138673	-0.0867739	0.950047	0.161614	-0.0402619	0.464892	0.289006	-0.0707252
BILBAN_B_CLL_LPL_DN	0.195401	-0.0843685	0.0141776	0.177471	-0.0837967	0.86275	0.196638	-0.060029	0.155117	0.0510516	-0.0760647
BILBAN_B_CLL_LPL_UP	0.0517591	-0.0488989	0.310924	0.0527088	0.0518082	0.938843	0.0561798	0.075869	0.478524	0.685239	0.0262594
BILD_CTNNB1_ONCOGENIC_SIGNATURE	0.0782406	-0.129237	0.0208211	0.0673967	0.0708857	0.969924	0.0823367	-0.0799256	0.290949	0.113583	-0.0460924
BILD_E2F3_ONCOGENIC_SIGNATURE	0.0378455	-0.035452	0.602269	0.0356236	-0.046657	0.96293	0.0383865	-0.00571467	0.883921	0.969611	-0.0292746
BILD_HRAS_ONCOGENIC_SIGNATURE	0.121943	-0.0771485	0.0396852	0.115329	-0.0562573	0.853158	0.136763	0.0741032	0.445951	0.211147	-0.0197675
BILD_MYC_ONCOGENIC_SIGNATURE	0.0743164	0.0260043	0.993783	0.0712327	0.0741762	0.928654	0.073854	0.039214	0.227014	0.792874	0.0464648
BILD_SRC_ONCOGENIC_SIGNATURE	0.0402943	-0.0327002	0.247318	0.03716	0.0042108	0.986527	0.0445563	-0.00123713	0.969756	0.823417	-0.00990885
BIOCARTA_AGR_PATHWAY	0.130844	0.018372	0.510928	0.12524	-0.0401158	0.950047	0.134167	0.0470733	0.27431	0.672273	0.00844317
BIOCARTA_ALK_PATHWAY	0.0236803	-0.209355	0.0881163	0.0240282	-0.22043	0.969924	0.0279948	-0.0768156	0.622415	0.438188	-0.168867
BIOCARTA_AT1R_PATHWAY	0.153112	-0.0543966	0.0457942	0.140599	-0.104919	0.730816	0.150084	-0.0733785	0.186913	0.118532	-0.0775647
BIOCARTA_ATRBRCA_PATHWAY	0	NA	0.304308	0	NA	0.969924	0	NA	0.122808	0.355947	NA
BIOCARTA_BAD_PATHWAY	0.0826479	-0.126801	0.0121006	0.0820905	-0.120093	0.810225	0.0883727	-0.0557225	0.700974	0.126327	-0.100872
BIOCARTA_BCR_PATHWAY	0.138481	-0.0569297	0.0198911	0.132476	-0.109666	0.643123	0.135436	-0.10151	0.0115876	0.0072166	-0.0893686
BIOCARTA_BIOPEPTIDES_PATHWAY	0.10904	-0.018254	0.242568	0.0926514	-0.137258	0.595022	0.108296	-0.0208223	0.952833	0.681022	-0.058778
BIOCARTA_CARM_ER_PATHWAY	0.0719815	-0.0623169	0.206784	0.0729492	0.00314531	0.999371	0.0759099	-0.0255736	0.762742	0.717858	-0.0282484
BIOCARTA_CERAMIDE_PATHWAY	0.0463329	-0.176641	0.000712426	0.0393583	-0.314293	0.513941	0.0546762	-0.042864	0.812236	0.0125178	-0.177932
BIOCARTA_CREB_PATHWAY	0.0878017	-0.0638594	0.519893	0.0912479	0.0471667	0.969924	0.0927648	-0.00153778	0.973713	0.964468	-0.00607683
BIOCARTA_CTCF_PATHWAY	0.0421167	-0.251301	0.0927017	0.0372831	-0.256113	0.681	0.0494694	-0.0540736	0.483518	0.322844	-0.187163
BIOCARTA_DEATH_PATHWAY	0.10173	-0.122916	0.0167635	0.0896882	-0.156008	0.623079	0.121032	0.0661371	0.596575	0.11822	-0.070929
BIOCARTA_EDG1_PATHWAY	0.122823	0.0847376	0.0563113	0.119076	0.0221055	0.863708	0.129515	0.117993	0.0243886	0.0360962	0.0749455
BIOCARTA_EGF_PATHWAY	0.101777	-0.0656178	0.113958	0.0919715	-0.121165	0.513941	0.103845	-0.0652259	0.185934	0.171349	-0.0840027
BIOCARTA_EICOSANOID_PATHWAY	0	NA	0.282021	0	#NAME?	0.732612	0	NA	0.137237	0.30936	NA
BIOCARTA_EIF4_PATHWAY	0.160846	0.0242093	0.869682	0.140347	-0.132876	0.681759	0.164625	0.0274409	0.538715	0.891966	-0.0270753
BIOCARTA_ERK_PATHWAY	0.123616	-0.0579841	0.0167129	0.116865	-0.0405962	0.844578	0.128365	0.0082702	0.902737	0.189606	-0.0301034
BIOCARTA_FAS_PATHWAY	0.102838	-0.0320594	0.551362	0.0904693	-0.120813	0.689164	0.111398	0.0705444	0.238112	0.569016	-0.0274428
BIOCARTA_FCER1_PATHWAY	0.112678	-0.0633344	0.0561911	0.1062	-0.117315	0.592985	0.114858	-0.0362369	0.428053	0.203699	-0.0722955
BIOCARTA_FMLP_PATHWAY	0.127795	-0.120267	4.02377e-05	0.111816	-0.196172	0.305541	0.136634	-0.0308844	0.58445	0.000596224	-0.115774
BIOCARTA_G1_PATHWAY	0.0889081	-0.040668	0.358304	0.0884893	-0.00352766	0.864349	0.0956384	0.0500971	0.73488	0.813801	0.00196713
BIOCARTA_G2_PATHWAY	0.0723282	-0.0235462	0.787459	0.0745578	0.090527	0.784763	0.061888	-0.165705	0.195921	0.646565	-0.0329079
BIOCARTA_GH_PATHWAY	0.0278823	0.100029	0.5405	0.0290162	0.17391	0.950047	0.0252141	-0.0212165	0.975363	0.96689	0.0842409
BIOCARTA_GLEEVEC_PATHWAY	0.127226	-0.0325999	0.189087	0.110669	-0.0868851	0.643123	0.125554	-0.0242043	0.661702	0.538717	-0.0478964
BIOCARTA_GPCR_PATHWAY	0.154869	-0.047816	0.0141776	0.148485	-0.103177	0.543642	0.153121	-0.0814041	0.0297223	0.0101956	-0.0774655
BIOCARTA_HDAC_PATHWAY	0.121245	-0.0514851	0.0750518	0.123238	-0.0153041	0.793411	0.122068	-0.0606678	0.591124	0.35013	-0.0424857
BIOCARTA_HER2_PATHWAY	0.0240239	-0.0534573	0.853471	0.0204953	-0.230164	0.918473	0.0269424	0.00796827	0.786168	0.986791	-0.0918845
BIOCARTA_HIVNEF_PATHWAY	0.0995389	-0.0486734	0.196569	0.0836769	-0.123289	0.513941	0.112058	0.0881168	0.103749	0.167141	-0.0279485
BIOCARTA_IGF1R_PATHWAY	0.0853828	-0.0688303	0.178818	0.0897597	0.0134749	0.947863	0.0925465	0.00713537	0.939532	0.720613	-0.0160733
BIOCARTA_IL1R_PATHWAY	0.0814866	-0.110454	0.0647125	0.0665509	-0.181369	0.513941	0.0900313	0.00352942	0.860965	0.311129	-0.096098
BIOCARTA_IL2_PATHWAY	0.0998879	-0.0922459	0.00934494	0.095337	-0.0951041	0.760982	0.102427	-0.0600452	0.0693353	0.0185432	-0.0824651
BIOCARTA_IL2RB_PATHWAY	0.086524	-0.0505316	0.0885823	0.0814286	-0.122759	0.513941	0.0839811	-0.0742912	0.166799	0.13509	-0.0825272
BIOCARTA_INFLAM_PATHWAY	0.0434235	-0.113625	0.609638	0.0325283	-0.240041	0.954779	0.0539724	0.17377	0.541284	0.889101	-0.0599652
BIOCARTA_INTEGRIN_PATHWAY	0.146046	-0.0204698	0.348098	0.127816	-0.129144	0.779593	0.148747	-0.0240094	0.730782	0.778724	-0.0578745
BIOCARTA_KERATINOCYTE_PATHWAY	0.0903476	-0.0956317	0.000481924	0.0775605	-0.192392	0.492361	0.0967256	-0.0308003	0.517204	0.00620434	-0.106275
BIOCARTA_MAPK_PATHWAY	0.0751293	-0.139639	0.00128334	0.0676407	-0.136169	0.432425	0.0808845	-0.0231252	0.901637	0.0187544	-0.0996446
BIOCARTA_MET_PATHWAY	0.128978	-0.0437618	0.0777084	0.123362	-0.0110477	0.795785	0.135858	-0.016244	0.527906	0.335505	-0.0236845
BIOCARTA_NFAT_PATHWAY	0.119437	0.0246717	0.926954	0.108706	-0.067395	0.760982	0.11648	-0.0405566	0.82704	0.98249	-0.0277599
BIOCARTA_NFKB_PATHWAY	0.0672734	-0.20777	0.0142676	0.0436453	-0.613564	0.563573	0.0771336	-0.0467286	0.99354	0.139747	-0.289354
BIOCARTA_NKT_PATHWAY	0.002388	-1.09361	0.430659	0.0117666	0.27684	0.969924	0.00568318	0.183963	0.759149	0.890452	-0.210937
BIOCARTA_NO1_PATHWAY	0.111318	-0.0288299	0.494086	0.100624	-0.0899989	0.673374	0.12111	0.0801703	0.15841	0.436065	-0.0128862
BIOCARTA_NTHI_PATHWAY	0.0741884	-0.268535	0.000537239	0.0536575	-0.470473	0.286316	0.0866581	-0.0703394	0.733636	0.00580024	-0.269782
BIOCARTA_NUCLEARRS_PATHWAY	0	NA	0.434206	0	#NAME?	0.92519	0	NA	0.425901	0.73983	NA
BIOCARTA_P38MAPK_PATHWAY	0.089323	0.035929	0.526832	0.0784173	-0.102362	0.942489	0.0867084	0.0112919	0.869258	0.946621	-0.0183803
BIOCARTA_PDGF_PATHWAY	0.115198	0.0132581	0.542214	0.0933251	-0.189264	0.598862	0.120004	0.0221071	0.760546	0.833851	-0.0512995
BIOCARTA_PPARA_PATHWAY	0.103737	-0.0991981	0.0149802	0.0971688	-0.152522	0.507307	0.106679	-0.0308844	0.794251	0.115686	-0.0942015
BIOCARTA_PTDINS_PATHWAY	0.126098	0.0143013	0.894724	0.116179	-0.128786	0.928654	0.128791	0.012221	0.969404	0.998564	-0.0340878
BIOCARTA_PYK2_PATHWAY	0.161864	-0.0339612	0.0423187	0.143507	-0.131554	0.60613	0.160543	-0.0345884	0.384108	0.160522	-0.066701
BIOCARTA_RACCYCD_PATHWAY	0.200735	-0.0454298	0.0229167	0.170055	-0.147407	0.573548	0.208405	0.00269088	0.817369	0.169849	-0.0633819
BIOCARTA_RAS_PATHWAY	0.17963	-0.0323849	0.365417	0.16283	-0.0638513	0.841467	0.187738	0.0147147	0.715454	0.805284	-0.0271739
BIOCARTA_RHO_PATHWAY	0.169206	0.0708815	0.059297	0.136674	-0.120009	0.733064	0.186156	0.163693	0.00560386	0.0107013	0.0381886
BIOCARTA_STRESS_PATHWAY	0.0928221	-0.161846	0.00174449	0.0699451	-0.327221	0.305541	0.106384	-0.00430247	0.87228	0.0177214	-0.164457
BIOCARTA_TCR_PATHWAY	0.136118	-0.0979149	0.000850028	0.124734	-0.135133	0.522549	0.143059	-0.0557864	0.159678	0.00398548	-0.096278
BIOCARTA_TNFR1_PATHWAY	0.101173	-0.0404048	0.525333	0.0872605	-0.157022	0.492361	0.107998	0.0659417	0.338764	0.560665	-0.0438285
BIOCARTA_TOLL_PATHWAY	0.123398	-0.12734	0.00184685	0.103315	-0.187018	0.432425	0.138696	-0.00834346	0.992078	0.0266485	-0.107567
BIOCARTA_TPO_PATHWAY	0.124587	-0.012164	0.424248	0.107	-0.109521	0.584408	0.128035	-0.0202592	0.417092	0.604265	-0.0473147
BIOCARTA_VDR_PATHWAY	0.0852843	-0.12795	0.0335653	0.0680798	-0.185203	0.544005	0.0959655	-0.0657444	0.684666	0.187306	-0.126299
BIOCARTA_VEGF_PATHWAY	0.0944262	0.0300701	0.7958	0.0897569	0.0479635	0.794203	0.0921316	-0.0240317	0.783412	0.965502	0.0180006
BIOCARTA_VIP_PATHWAY	0.15591	-0.142324	0.000168985	0.139188	-0.160752	0.623079	0.168972	-0.016244	0.721994	0.00421624	-0.10644
BIOCARTA_WNT_PATHWAY	0.0877239	-0.0351952	0.248653	0.0821779	-0.106988	0.811028	0.095465	0.0898247	0.829243	0.733728	-0.0174527
BLALOCK_ALZHEIMERS_DISEASE_DN	0.225071	0.00107439	0.897783	0.221065	-0.0166718	0.961421	0.222967	-0.00741081	0.856678	0.996338	-0.00766941
BLALOCK_ALZHEIMERS_DISEASE_INCIPIENT_DN	0.173625	-0.010928	0.209896	0.164519	-0.0562329	0.939632	0.172487	-0.0403232	0.15513	0.323276	-0.0358281
BLALOCK_ALZHEIMERS_DISEASE_INCIPIENT_UP	0.0758257	-0.0243152	0.306291	0.0714694	-0.00843049	0.991867	0.0803365	0.0282883	0.666667	0.784173	-0.00148581
BLALOCK_ALZHEIMERS_DISEASE_UP	0.139457	-0.0441536	0.00234736	0.136799	-0.00565684	0.887941	0.144837	-0.00118602	0.971866	0.0535453	-0.0169988
BLANCO_MELO_BETA_INTERFERON_TREATED_BRONCHIAL_EPITHELIAL_CELLS_DN	0.0146947	0.150494	0.0290184	0.0166657	0.104502	0.864725	0.0170475	0.299685	6.0316e-05	0.000157701	0.184894
BLANCO_MELO_BETA_INTERFERON_TREATED_BRONCHIAL_EPITHELIAL_CELLS_UP	0.0559977	-0.0302122	0.504894	0.0497105	-0.157803	0.805255	0.0546657	-0.0514792	0.992127	0.935835	-0.0798316
BLANCO_MELO_BRONCHIAL_EPITHELIAL_CELLS_INFLUENZA_A_DEL_NS1_INFECTION_DN	0.0243386	0.690782	0.183026	0.00981317	-0.113366	0.969924	0.0129928	0.0482042	0.883921	0.716645	0.20854
BLANCO_MELO_BRONCHIAL_EPITHELIAL_CELLS_INFLUENZA_A_DEL_NS1_INFECTION_UP	0.0621267	-0.104572	0.0354097	0.0578825	-0.229897	0.350418	0.0588795	-0.117655	0.172791	0.0558002	-0.150708
BLANCO_MELO_BRONCHIAL_EPITHELIAL_CELLS_INFLUENZA_A_INFECTION_DN	0.0747266	0.0279488	0.183857	0.0716124	0.00466275	0.990281	0.0737656	0.0239238	0.43631	0.535436	0.0188451
BLANCO_MELO_BRONCHIAL_EPITHELIAL_CELLS_INFLUENZA_A_INFECTION_UP	0.0370817	-0.0986023	0.0750513	0.0358488	-0.0917559	0.733064	0.0372458	-0.0471137	0.745826	0.38129	-0.0791573
BLANCO_MELO_COVID19_BRONCHIAL_EPITHELIAL_CELLS_SARS_COV_2_INFECTION_DN	0.010411	0.0844994	0.764781	0.00734979	0.0311487	0.961421	0.0100614	0.106128	0.590026	0.947399	0.0739255
BLANCO_MELO_COVID19_BRONCHIAL_EPITHELIAL_CELLS_SARS_COV_2_INFECTION_UP	0.0723502	-0.10106	0.0706042	0.0728894	-0.0707299	0.826428	0.0689256	-0.0622488	0.364057	0.26064	-0.078013
BLANCO_MELO_COVID19_SARS_COV_2_INFECTION_A594_ACE2_EXPRESSING_CELLS_DN	0.0959038	0.0155397	0.441664	0.0989052	0.0130562	0.983803	0.0934183	0.0256409	0.81389	0.912298	0.0180789
BLANCO_MELO_COVID19_SARS_COV_2_INFECTION_A594_ACE2_EXPRESSING_CELLS_RUXOLITINIB_DN	0.148177	0.0230391	0.537095	0.15147	-0.0121537	0.986234	0.134727	-0.00252843	0.748911	0.933036	0.00278565
BLANCO_MELO_COVID19_SARS_COV_2_INFECTION_A594_ACE2_EXPRESSING_CELLS_RUXOLITINIB_UP	0.0625946	-0.22013	0.00035917	0.0587621	-0.201008	0.718187	0.0662639	-0.099701	0.330161	0.0046226	-0.173613
BLANCO_MELO_COVID19_SARS_COV_2_INFECTION_A594_ACE2_EXPRESSING_CELLS_UP	0.0662271	-0.232442	0.000268589	0.0655731	-0.183711	0.573548	0.0697918	-0.105578	0.141835	0.00151443	-0.17391
BLANCO_MELO_COVID19_SARS_COV_2_INFECTION_A594_CELLS_DN	0.0351928	-0.0370174	0.380701	0.0382659	-0.0119361	0.818115	0.0340327	-0.024149	0.646193	0.782544	-0.0243675
BLANCO_MELO_COVID19_SARS_COV_2_INFECTION_A594_CELLS_UP	0.0255613	0.219515	0.0118219	0.0239743	0.0769452	0.972385	0.0269137	0.33367	0.011097	0.00639983	0.210043
BLANCO_MELO_COVID19_SARS_COV_2_INFECTION_CALU3_CELLS_UP	0.0682748	-0.0757849	0.0900315	0.0625687	-0.158825	0.647388	0.0609074	-0.14315	0.320321	0.240925	-0.12592
BLANCO_MELO_COVID19_SARS_COV_2_LOW_MOI_INFECTION_A594_ACE2_EXPRESSING_CELLS_UP	0.103781	-0.184881	9.0771e-05	0.0902785	-0.30058	0.511056	0.105553	-0.11976	0.143841	0.000560041	-0.20174
BLANCO_MELO_COVID19_SARS_COV_2_POS_PATIENT_LUNG_TISSUE_DN	0.0488464	0.0298809	0.220456	0.0443598	-0.0445857	0.995918	0.0531567	0.13602	0.000322086	0.00397589	0.0404383
BLANCO_MELO_COVID19_SARS_COV_2_POS_PATIENT_LUNG_TISSUE_UP	0.0343484	-0.0149265	0.638109	0.0313147	-0.088386	0.798017	0.0333702	-0.00261121	0.99895	0.968722	-0.0353079
BLANCO_MELO_HUMAN_PARAINFLUENZA_VIRUS_3_INFECTION_A594_CELLS_DN	0.0103876	0.163499	0.0832473	0.013554	0.0390948	0.995918	0.0104912	0.0415236	0.925086	0.526518	0.0813724
BLANCO_MELO_HUMAN_PARAINFLUENZA_VIRUS_3_INFECTION_A594_CELLS_UP	0.0739955	-0.0276638	0.764758	0.0687871	-0.123374	0.678276	0.0721237	-0.0163507	0.969066	0.967324	-0.0557962
BLANCO_MELO_INFLUENZA_A_INFECTION_A594_CELLS_DN	0.0589652	-0.0487741	0.00524158	0.0620238	-0.056503	0.733064	0.0552699	-0.0818097	0.0150482	0.00337498	-0.0623623
BLANCO_MELO_INFLUENZA_A_INFECTION_A594_CELLS_UP	0.170012	0.0760784	0.606843	0.15776	0.0594153	0.939632	0.162561	0.0204848	0.689531	0.931516	0.0519928
BLANCO_MELO_MERS_COV_INFECTION_MCR5_CELLS_DN	0.102104	0.0641666	0.0156908	0.100241	0.0507228	0.623079	0.0988293	0.0245223	0.457228	0.0940795	0.0464706
BLANCO_MELO_MERS_COV_INFECTION_MCR5_CELLS_UP	0.0369149	-0.172107	0.00259881	0.0340955	-0.328943	0.305541	0.0393091	-0.0252897	0.662675	0.0194954	-0.175447
BLANCO_MELO_RESPIRATORY_SYNCYTIAL_VIRUS_INFECTION_A594_CELLS_DN	0.00962756	0.352528	0.00066231	0.0110732	0.212476	0.952658	0.00757374	0.0484171	0.75735	0.0181004	0.204473
BLANCO_MELO_RESPIRATORY_SYNCYTIAL_VIRUS_INFECTION_A594_CELLS_UP	0.0653988	-0.00906691	0.87302	0.0571643	-0.149802	0.760982	0.0629015	-0.0314121	0.874235	0.982111	-0.0634271
BLUM_RESPONSE_TO_SALIRASIB_DN	0.139182	0.0548811	0.978086	0.123966	0.00971766	0.969924	0.128876	-0.00626101	0.696092	0.991247	0.0194459
BLUM_RESPONSE_TO_SALIRASIB_UP	0.12524	-0.018633	0.51115	0.119258	-0.0600415	0.908558	0.123054	-0.0293065	0.91078	0.943498	-0.0359937
BOCHKIS_FOXA2_TARGETS	0.0650604	-0.00654193	0.85269	0.0629775	-0.0512119	0.761609	0.0647163	0.0156526	0.691016	0.952394	-0.0140337
BOGNI_TREATMENT_RELATED_MYELOID_LEUKEMIA_DN	0.100347	0.0202834	0.450056	0.0899502	-0.0733133	0.946308	0.0982749	-0.0364196	0.5457	0.819003	-0.0298165
BOGNI_TREATMENT_RELATED_MYELOID_LEUKEMIA_UP	0.0895398	0.0174826	0.681106	0.0825482	-0.0612922	0.826428	0.0906679	0.0216622	0.515445	0.871276	-0.00738249
BOHN_PRIMARY_IMMUNODEFICIENCY_SYNDROM_DN	0.0604594	0.0140666	0.844435	0.0608902	-0.0676669	0.950047	0.0601478	0.054211	0.732874	0.983143	0.000203581
BOHN_PRIMARY_IMMUNODEFICIENCY_SYNDROM_UP	0.149379	0.0324351	0.73578	0.134761	-0.0202909	0.935404	0.145453	0.0066338	0.905612	0.987594	0.00625932
BONCI_TARGETS_OF_MIR15A_AND_MIR16_1	0.0588682	-0.174376	0.000439118	0.0582372	-0.0741062	0.901073	0.0679576	0.0147373	0.735595	0.0123083	-0.077915
BONOME_OVARIAN_CANCER_POOR_SURVIVAL_UP	0.0950793	0.0116418	0.96942	0.0951488	0.146591	0.784129	0.0990622	0.034642	0.809933	0.986721	0.0642915
BONOME_OVARIAN_CANCER_SURVIVAL_OPTIMAL_DEBULKING	0.0899045	-0.00205878	0.954478	0.0905105	-0.000300115	0.976212	0.0897659	0.00156906	0.947728	0.999708	-0.000263278
BONOME_OVARIAN_CANCER_SURVIVAL_SUBOPTIMAL_DEBULKING	0.0504459	-0.0116852	0.514612	0.0516547	-0.00859976	0.950047	0.052181	0.0121769	0.768891	0.92363	-0.0027027
BOQUEST_STEM_CELL_CULTURED_VS_FRESH_DN	0.063896	-0.165404	0.912576	0.0803326	0.0897437	0.904435	0.0729432	0.112832	0.976629	0.998578	0.0123905
BOQUEST_STEM_CELL_CULTURED_VS_FRESH_UP	0.0923747	-0.0684031	0.0357787	0.0852488	-0.117665	0.689164	0.094724	-0.0166926	0.656726	0.220606	-0.0675869
BOQUEST_STEM_CELL_DN	0.054445	0.0635759	0.0578932	0.052942	0.00372823	0.990599	0.053	0.0060758	0.849821	0.418428	0.02446
BOQUEST_STEM_CELL_UP	0.0429245	-0.0189613	0.933083	0.0468115	0.0771732	0.826428	0.0450182	0.057911	0.294541	0.813292	0.0387076
BORCZUK_MALIGNANT_MESOTHELIOMA_DN	0.0351992	-0.201564	0.00221604	0.0381852	0.0268021	0.971552	0.0408787	-0.0483292	0.851009	0.0497654	-0.0743636
BORCZUK_MALIGNANT_MESOTHELIOMA_UP	0.202157	0.0101193	0.87302	0.191441	0.0208335	0.999371	0.202587	0.00203292	0.750663	0.99077	0.0109952
BORLAK_LIVER_CANCER_EGF_UP	0.250641	0.011875	0.761802	0.241616	-0.0411043	0.996739	0.262711	0.0640182	0.253339	0.770788	0.0115963
BOSCO_ALLERGEN_INDUCED_TH2_ASSOCIATED_MODULE	0.059834	-0.0174565	0.753147	0.0617764	0.0269442	0.972385	0.0634323	0.0612819	0.324689	0.824638	0.0235898
BOSCO_EPITHELIAL_DIFFERENTIATION_MODULE	0.0728818	0.0709885	0.163524	0.0840006	0.117967	0.594192	0.0809435	0.111668	0.141835	0.199315	0.100208
BOSCO_INTERFERON_INDUCED_ANTIVIRAL_MODULE	0.0177024	0.228009	0.124064	0.0174793	-0.213553	0.950047	0.0141106	0.00171172	0.979417	0.633727	0.00538925
BOSCO_TH1_CYTOTOXIC_MODULE	0.0143347	0.0741948	0.963884	0.0131029	-0.0160569	0.99909	0.0108372	-0.139011	0.422512	0.93727	-0.0269578
BOUDOUKHA_BOUND_BY_IGF2BP2	0.222407	-0.00971237	0.454422	0.221093	-0.0233421	0.916873	0.221823	0.00603251	0.674959	0.864277	-0.00900731
BOYAULT_LIVER_CANCER_SUBCLASS_G1_DN	0.0736185	-0.0487744	0.359151	0.0836502	0.0635403	0.946308	0.0707483	-0.0230349	0.905612	0.884149	-0.00275632
BOYAULT_LIVER_CANCER_SUBCLASS_G1_UP	0.11992	-0.0147843	0.410913	0.116512	0.00420473	0.969924	0.126013	0.0316789	0.143023	0.454185	0.00703314
BOYAULT_LIVER_CANCER_SUBCLASS_G12_UP	0.0478102	-0.046806	0.441664	0.0570863	0.0923066	0.938843	0.0474802	-0.0201895	0.728656	0.880166	0.00843704
BOYAULT_LIVER_CANCER_SUBCLASS_G123_DN	0.0204953	0.305559	0.000168937	0.0204188	0.0924286	0.942282	0.0203762	0.204738	0.054603	0.000700147	0.200909
BOYAULT_LIVER_CANCER_SUBCLASS_G123_UP	0.14	0.00325568	0.87302	0.111914	-0.015758	0.928654	0.142641	0.0206417	0.571258	0.956831	0.00271313
BOYAULT_LIVER_CANCER_SUBCLASS_G2	0.0315136	0.159221	0.0978637	0.0242345	-0.225582	0.90279	0.0310225	0.149915	0.0536536	0.0979906	0.0278511
BOYAULT_LIVER_CANCER_SUBCLASS_G23_UP	0.0830349	0.149714	0.655407	0.0548306	-0.184771	0.853596	0.0781569	0.156626	0.583977	0.896624	0.0405228
BOYAULT_LIVER_CANCER_SUBCLASS_G3_DN	0.0196113	-0.289407	0.00847501	0.0257297	-0.0687806	0.901015	0.0224958	-0.138976	0.259461	0.0526884	-0.165721
BOYAULT_LIVER_CANCER_SUBCLASS_G3_UP	0.163946	-0.0229421	0.406651	0.15526	0.00831654	0.815225	0.164726	-0.00262604	0.770265	0.841864	-0.00575054
BOYAULT_LIVER_CANCER_SUBCLASS_G5_DN	0.168679	0.0638412	0.480736	0.157448	0.0399639	0.962255	0.178584	0.107562	0.265224	0.650146	0.0704558
BOYAULT_LIVER_CANCER_SUBCLASS_G6_UP	0.044477	0.187954	1.5956e-05	0.0433629	0.115269	0.62446	0.0432001	0.0521423	0.367433	0.000336323	0.118455
BOYLAN_MULTIPLE_MYELOMA_C_CLUSTER_DN	0.0920528	-0.0202003	0.945983	0.0947002	0.0728779	0.918215	0.0990824	0.0529804	0.583977	0.968393	0.0352193
BOYLAN_MULTIPLE_MYELOMA_C_CLUSTER_UP	0.0374784	-0.0861978	0.205925	0.0352025	-0.0972597	0.864349	0.0394909	0.0244563	0.821715	0.697674	-0.0530004
BOYLAN_MULTIPLE_MYELOMA_C_D_DN	0.0467638	0.00459306	0.256021	0.0506234	-0.0557321	0.969924	0.0476121	0.0408372	0.377245	0.578119	-0.00343394
BOYLAN_MULTIPLE_MYELOMA_C_D_UP	0.0869428	-0.0628666	0.0171087	0.0861121	0.0684783	0.791721	0.0924107	-0.00516854	0.88092	0.181781	0.000147751
BOYLAN_MULTIPLE_MYELOMA_C_DN	0.0916073	-0.0431584	0.504894	0.0842657	-0.0295149	0.991867	0.100618	0.103052	0.20894	0.607398	0.0101262
BOYLAN_MULTIPLE_MYELOMA_C_UP	0.0400048	-0.17668	0.0212912	0.0416151	0.001651	0.981018	0.0392512	-0.100235	0.254865	0.106157	-0.0917547
BOYLAN_MULTIPLE_MYELOMA_D_CLUSTER_DN	0.0822945	0.0521705	0.116636	0.0763297	-0.00225304	0.999371	0.0829108	0.0640203	0.241383	0.307969	0.0379793
BOYLAN_MULTIPLE_MYELOMA_D_CLUSTER_UP	0.0697724	-0.06209	0.220456	0.0749887	0.00797853	0.947353	0.0693188	-0.0272293	0.431432	0.567937	-0.0271136
BOYLAN_MULTIPLE_MYELOMA_D_DN	0.0915667	0.00931553	0.757327	0.0891919	0.0114137	0.954403	0.0965128	0.0663003	0.0192989	0.200851	0.0290098
BOYLAN_MULTIPLE_MYELOMA_D_UP	0.0545826	-0.00571452	0.491645	0.0487127	-0.0219179	0.990599	0.0582153	0.058898	0.231857	0.627791	0.0104219
BOYLAN_MULTIPLE_MYELOMA_PCA1_UP	0.0541128	0.0515398	0.07176	0.0569613	-0.03563	0.939632	0.0538436	0.036657	0.2855	0.24549	0.0175223
BOYLAN_MULTIPLE_MYELOMA_PCA3_DN	0.0329251	0.053689	0.164072	0.0285204	-0.0995542	0.982904	0.036083	0.163762	0.0784061	0.188671	0.039299
BOYLAN_MULTIPLE_MYELOMA_PCA3_UP	0.061028	-0.0259991	0.851865	0.0600374	0.00995195	0.991867	0.0660081	0.0454093	0.324434	0.858454	0.00978739
BRACHAT_RESPONSE_TO_CAMPTOTHECIN_DN	0.275558	-0.00523698	0.460401	0.267846	-0.0421822	0.969924	0.279069	0.00135206	0.682636	0.882081	-0.0153557
BRACHAT_RESPONSE_TO_CAMPTOTHECIN_UP	0.0318578	-0.194155	0.193902	0.0268017	-0.144082	0.979142	0.0347395	-0.0495558	0.875765	0.73219	-0.129264
BRACHAT_RESPONSE_TO_CISPLATIN	0.0279371	0.0537145	0.642679	0.0253085	0.19601	0.702835	0.0299574	0.17615	0.256165	0.634352	0.141958
BRACHAT_RESPONSE_TO_METHOTREXATE_DN	0.255183	-0.01097	0.48993	0.266883	0.035999	0.996379	0.27314	0.086239	0.362417	0.748732	0.0370893
BRACHAT_RESPONSE_TO_METHOTREXATE_UP	0.038245	-0.0965593	0.536893	0.0328476	0.0273505	0.901015	0.0428201	0.060121	0.874235	0.943473	-0.00302928
BREDEMEYER_RAG_SIGNALING_NOT_VIA_ATM_DN	0.0321692	0.159339	0.00299941	0.0291915	-0.0132385	0.972385	0.0347841	0.172201	0.0088113	0.00173266	0.106101
BREDEMEYER_RAG_SIGNALING_NOT_VIA_ATM_UP	0.032735	0.0507213	0.174587	0.0363877	-0.00215632	0.9982	0.0354745	0.104533	0.132177	0.273654	0.0510328
BREDEMEYER_RAG_SIGNALING_VIA_ATM_NOT_VIA_NFKB_DN	0.0661748	0.0632816	0.0563113	0.0657385	0.145114	0.643123	0.0676821	0.088922	0.445951	0.22024	0.0991058
BREDEMEYER_RAG_SIGNALING_VIA_ATM_NOT_VIA_NFKB_UP	0.0434934	-0.0760393	0.0414241	0.0457334	-0.0145379	0.951832	0.0463333	-0.0329573	0.49287	0.246911	-0.0411781
BRIDEAU_IMPRINTED_GENES	0.040237	-0.0222132	0.628484	0.0483468	0.15118	0.577327	0.0429764	0	0.92041	0.901075	0.0429888
BROCKE_APOPTOSIS_REVERSED_BY_IL6	0.114838	-0.0912982	0.020901	0.111082	-0.147845	0.593712	0.114691	-0.0604023	0.615485	0.135613	-0.0998485
BROWN_MYELOID_CELL_DEVELOPMENT_DN	0.135457	-0.0340167	0.699681	0.132797	0.0468237	0.901015	0.135213	-0.0241249	0.697236	0.949363	-0.00377263
BROWN_MYELOID_CELL_DEVELOPMENT_UP	0.0895926	-0.00603935	0.980061	0.0872259	-0.0531092	0.689164	0.0963941	0.108994	0.027935	0.242489	0.016615
BROWNE_HCMV_INFECTION_10HR_DN	0.100336	-0.0484907	0.576453	0.10381	0.0673262	0.875045	0.108019	0.00448073	0.99895	0.967612	0.00777208
BROWNE_HCMV_INFECTION_10HR_UP	0.0761568	-0.0663084	0.178674	0.0703034	-0.010941	0.864349	0.0770839	-0.0240122	0.76615	0.640365	-0.0337539
BROWNE_HCMV_INFECTION_12HR_DN	0.0465024	-0.148866	0.00541505	0.0544613	0.0939512	0.791721	0.0490074	-0.047646	0.691366	0.0704385	-0.0341869
BROWNE_HCMV_INFECTION_12HR_UP	0.0314181	-0.0464182	0.679789	0.0309898	-0.0771573	0.92906	0.0337232	0.0873852	0.203964	0.663317	-0.0120634
BROWNE_HCMV_INFECTION_14HR_DN	0.0683067	0.00646626	0.774984	0.066677	0.0825622	0.884332	0.0698192	0.0153095	0.641192	0.949323	0.0347793
BROWNE_HCMV_INFECTION_14HR_UP	0.0600758	-0.0603574	0.0111177	0.0554919	-0.0524195	0.760982	0.0567198	-0.0958216	0.0746476	0.0224237	-0.0695328
BROWNE_HCMV_INFECTION_16HR_DN	0.075529	0.0328409	0.419625	0.0687805	0.00126702	0.875979	0.075882	0.0245798	0.411672	0.706868	0.0195626
BROWNE_HCMV_INFECTION_16HR_UP	0.0211003	-0.145974	0.0331288	0.0185303	-0.240298	0.969924	0.0231494	-0.0867648	0.700774	0.269954	-0.157679
BROWNE_HCMV_INFECTION_18HR_DN	0.0683129	0.0164259	0.686575	0.0615176	-0.0903921	0.451784	0.0681996	-0.000885456	0.925086	0.868813	-0.0249505
BROWNE_HCMV_INFECTION_18HR_UP	0.0493027	-0.0990934	0.00172407	0.0529203	-0.0086263	0.959615	0.0533141	0.0237639	0.690185	0.0350851	-0.0279853
BROWNE_HCMV_INFECTION_1HR_DN	0.0352308	-0.0593729	0.0464067	0.0368263	-0.0055119	0.969924	0.0345879	-0.0857744	0.0558197	0.0625749	-0.0502197
BROWNE_HCMV_INFECTION_1HR_UP	0.0351257	-0.0199388	0.638098	0.0409761	0.174303	0.865604	0.0403631	0.130835	0.131913	0.513619	0.0950663
BROWNE_HCMV_INFECTION_20HR_DN	0.0623945	0.0470454	0.07176	0.0640256	0.0657006	0.890375	0.0647917	0.0816963	0.331683	0.260267	0.0648141
BROWNE_HCMV_INFECTION_20HR_UP	0.0334803	-0.193161	0.00020094	0.0390609	0.00748005	0.931093	0.0350586	-0.076348	0.212301	0.00248168	-0.0873431
BROWNE_HCMV_INFECTION_24HR_DN	0.110046	0.0197031	0.0707923	0.102072	-0.00621406	0.950047	0.113792	0.0456049	0.027935	0.0506867	0.019698
BROWNE_HCMV_INFECTION_24HR_UP	0.0613117	-0.0266561	0.349995	0.0638709	0.000380776	0.932119	0.0617303	0.0136549	0.99468	0.895235	-0.00420679
BROWNE_HCMV_INFECTION_2HR_DN	0.142396	0.0670992	0.147299	0.118583	-0.0173589	0.968452	0.141403	0.0878835	0.180491	0.292365	0.0458746
BROWNE_HCMV_INFECTION_2HR_UP	0.117745	-0.205123	4.32618e-06	0.118014	-0.242704	0.406939	0.115111	-0.192013	0.0107955	3.36048e-06	-0.21328
BROWNE_HCMV_INFECTION_30MIN_DN	0.0336321	-0.0128992	0.538607	0.0298223	-0.168563	0.689164	0.0359609	-0.00104203	0.754706	0.863404	-0.0608346
BROWNE_HCMV_INFECTION_30MIN_UP	0.0790137	-0.1804	0.000226105	0.0860359	-0.206511	0.451646	0.0813544	-0.130052	0.0167894	0.00017558	-0.172321
BROWNE_HCMV_INFECTION_48HR_DN	0.0876076	0.0147178	0.952519	0.0821002	-0.0523385	0.950047	0.0872622	-0.00674367	0.682636	0.986963	-0.0147881
BROWNE_HCMV_INFECTION_48HR_UP	0.052423	-0.00112875	0.998943	0.0526368	0.0562474	0.864725	0.0564333	0.0644666	0.187878	0.7257	0.0398618
BROWNE_HCMV_INFECTION_4HR_DN	0.0405763	-0.108941	0.00210441	0.0429823	-0.0255068	0.865019	0.0414671	-0.0402787	0.186164	0.0138633	-0.0582421
BROWNE_HCMV_INFECTION_4HR_UP	0.0516817	-0.290815	0.00207016	0.0638823	0.0835269	0.975695	0.0546406	-0.211761	0.0687238	0.00684769	-0.139683
BROWNE_HCMV_INFECTION_6HR_DN	0.0435439	0.0156848	0.815428	0.0439078	0.0297404	0.889029	0.0441318	-0.0242559	0.991117	0.995291	0.00705645
BROWNE_HCMV_INFECTION_6HR_UP	0.0538831	0.085884	0.152021	0.0528182	0.117208	0.901015	0.0499401	0.0100118	0.922598	0.658135	0.0710345
BROWNE_HCMV_INFECTION_8HR_DN	0.0431847	-0.0180692	0.848334	0.0425384	-0.150503	0.702002	0.0443243	-0.0121282	0.918348	0.97654	-0.0602333
BROWNE_HCMV_INFECTION_8HR_UP	0.068361	-0.132718	0.000481056	0.0599675	-0.188115	0.450607	0.0679037	-0.0900299	0.122389	0.00177894	-0.136954
BROWNE_INTERFERON_RESPONSIVE_GENES	0.0692001	0.132113	0.362057	0.0468146	-0.403014	0.450607	0.0452777	-0.362366	0.121045	0.249344	-0.211089
BRUECKNER_TARGETS_OF_MIRLET7A3_DN	0.15362	0.100535	0.000238421	0.147466	0.107377	0.785972	0.151583	0.0845653	0.00305706	6.79759e-05	0.0974926
BRUECKNER_TARGETS_OF_MIRLET7A3_UP	0.0858361	0.0176693	0.88862	0.0759448	-0.0301183	0.983803	0.089418	0.0984587	0.0144462	0.188527	0.0286699
BRUINS_UVC_RESPONSE_EARLY_LATE	0.0574607	-0.0375239	0.0604533	0.0558294	0.0200423	0.96293	0.0595437	-0.0362276	0.361806	0.259295	-0.0179031
BRUINS_UVC_RESPONSE_LATE	0.102724	0.00973756	0.422261	0.102062	-0.00150138	0.942489	0.103002	-0.00163853	0.869192	0.908036	0.00219922
BRUINS_UVC_RESPONSE_MIDDLE	0.0239069	-0.128227	0.166673	0.029568	-0.0364152	0.936688	0.0260459	-0.0363793	0.887988	0.683193	-0.0670072
BRUINS_UVC_RESPONSE_VIA_TP53_GROUP_A	0.0389722	-0.00304888	0.794621	0.0401118	-0.0288581	0.908558	0.0410652	0.060468	0.023611	0.227767	0.00952033
BRUINS_UVC_RESPONSE_VIA_TP53_GROUP_B	0.0691252	7.24554e-05	0.947486	0.0687928	-0.0827776	0.887314	0.0709964	0.0246709	0.497193	0.94163	-0.0193448
BRUINS_UVC_RESPONSE_VIA_TP53_GROUP_C	0.0354701	-0.0802776	0.143737	0.0349964	-0.100033	0.689164	0.0355491	-0.0804607	0.527906	0.434284	-0.0869239
BRUINS_UVC_RESPONSE_VIA_TP53_GROUP_D	0.0424743	0.0196244	0.752285	0.0433113	0.0424384	0.969924	0.0421066	-0.0398542	0.806876	0.983255	0.00740286
BRUNO_HEMATOPOIESIS	0.136887	0.0311574	0.527439	0.143114	0.0274988	0.991867	0.128227	-0.0330477	0.794936	0.940815	0.00853614
BUFFA_HYPOXIA_METAGENE	0.248408	-0.0169738	0.351551	0.247113	-0.0406527	0.784763	0.252008	0.0196485	0.988789	0.857332	-0.0126593
BURTON_ADIPOGENESIS_1	0.168276	-0.166856	0.00528473	0.185203	-0.097803	0.853158	0.155471	-0.176167	0.234836	0.0331577	-0.146942
BURTON_ADIPOGENESIS_10	0.0963579	0.161459	0.00098831	0.0896514	0.124516	0.634926	0.103783	0.192547	0.000512068	4.10377e-05	0.159507
BURTON_ADIPOGENESIS_11	0.0881466	-0.0812168	0.191035	0.0726509	-0.164758	0.877443	0.103213	0.0556149	0.823265	0.681949	-0.0634534
BURTON_ADIPOGENESIS_12	0.0808969	-0.109696	0.229187	0.0809549	0.123887	0.969924	0.081738	-0.120902	0.310658	0.500307	-0.0355702
BURTON_ADIPOGENESIS_2	0.0974383	0.0290014	0.697301	0.0924679	0.0656439	0.938843	0.101521	0.0159697	0.715501	0.958369	0.0368717
BURTON_ADIPOGENESIS_3	0.0764441	0.359327	0.534923	0.0438839	0.0020849	0.931093	0.0485234	0.0275322	0.770519	0.927309	0.129648
BURTON_ADIPOGENESIS_4	0.156104	-0.0499691	0.296016	0.144777	-0.036724	0.92906	0.162904	-0.0200531	0.439897	0.646355	-0.0355821
BURTON_ADIPOGENESIS_5	0.137762	0.0508291	0.575865	0.119733	-0.0317273	0.950047	0.128831	-0.00374861	0.875765	0.961361	0.00511773
BURTON_ADIPOGENESIS_6	0.102984	0.063769	0.0365339	0.10336	0.0257943	0.975393	0.0972894	0.021523	0.859999	0.323584	0.0370288
BURTON_ADIPOGENESIS_7	0.213889	0.0397876	0.313788	0.212804	0.0115983	0.999371	0.218572	0.0396151	0.169741	0.438332	0.0303337
BURTON_ADIPOGENESIS_8	0.173976	0.0299708	0.358022	0.165997	-0.0747895	0.853158	0.174087	0.0197444	0.184394	0.451385	-0.00835812
BURTON_ADIPOGENESIS_9	0.106488	-0.128101	0.0227054	0.113351	-0.110815	0.733064	0.106798	-0.0803967	0.109323	0.0495151	-0.106438
BURTON_ADIPOGENESIS_PEAK_AT_0HR	0.0741274	0.0031402	0.853535	0.0873319	0.130692	0.70573	0.0692577	-0.0647141	0.28933	0.744747	0.0230394
BURTON_ADIPOGENESIS_PEAK_AT_16HR	0.0860441	-0.0317854	0.913097	0.0842322	0.0929097	0.733064	0.0804897	-0.018315	0.969756	0.990238	0.0142698
BURTON_ADIPOGENESIS_PEAK_AT_24HR	0.0818281	0.123915	0.115589	0.0802529	0.199696	0.733064	0.0666356	-0.050348	0.541284	0.405062	0.0910878
BURTON_ADIPOGENESIS_PEAK_AT_2HR	0.192084	-0.15823	0.00316696	0.174581	-0.30771	0.513941	0.180496	-0.164525	0.10056	0.00780994	-0.210155
BURTON_ADIPOGENESIS_PEAK_AT_8HR	0.154043	-0.0522394	0.175954	0.142992	-0.0454506	0.886663	0.167465	0.0288068	0.876725	0.67955	-0.0229611
BUYTAERT_PHOTODYNAMIC_THERAPY_STRESS_DN	0.061091	0.0366113	0.166307	0.0617714	0.068586	0.969924	0.0563416	-0.042171	0.385065	0.474523	0.0210088
BUYTAERT_PHOTODYNAMIC_THERAPY_STRESS_UP	0.0837583	-0.142914	0.00306162	0.0837056	-0.0711863	0.922999	0.0893011	-0.0665817	0.626269	0.0485181	-0.0935607
BYSTROEM_CORRELATED_WITH_IL5_DN	0.0765389	-0.0119322	0.617848	0.0735746	0.113888	0.826428	0.0849841	0.0472323	0.394736	0.78292	0.0497294
BYSTROEM_CORRELATED_WITH_IL5_UP	0.106813	-0.0641844	0.0524929	0.10309	-0.0903149	0.955046	0.115274	0.0349903	0.602133	0.320783	-0.0398364
BYSTRYKH_HEMATOPOIESIS_STEM_CELL_AND_BRAIN_QTL_CIS	0.130321	0.0332277	0.302242	0.136686	0.0806471	0.647388	0.126094	-0.0082683	0.727937	0.690511	0.0352022
BYSTRYKH_HEMATOPOIESIS_STEM_CELL_AND_BRAIN_QTL_TRANS	0.0921372	-0.00704027	0.794565	0.0838838	-0.0645318	0.694662	0.0981148	0.0506765	0.117812	0.485587	-0.00696518
BYSTRYKH_HEMATOPOIESIS_STEM_CELL_QTL_CIS	0.113735	0.0721968	0.00182443	0.122606	0.111166	0.609919	0.110131	0.0206602	0.795998	0.0289933	0.0680077
BYSTRYKH_HEMATOPOIESIS_STEM_CELL_QTL_TRANS	0.0902783	-0.0129862	0.10188	0.0877511	-0.00873248	0.961421	0.0913147	0.00572846	0.933005	0.571631	-0.00533006
BYSTRYKH_HEMATOPOIESIS_STEM_CELL_SCP2_QTL_TRANS	0.0869006	-0.0216557	0.219133	0.084171	-0.0505919	0.841878	0.0874928	-0.00356779	0.752489	0.68356	-0.0252718
CADWELL_ATG16L1_TARGETS_DN	0.0401245	-0.0620806	0.634108	0.0366154	-0.15471	0.513941	0.0410715	0.0068515	0.832964	0.856202	-0.0699796
CADWELL_ATG16L1_TARGETS_UP	0.0102478	0.153012	0.629175	0.010127	-0.123138	0.864725	0.0082901	-0.167898	0.779444	0.943901	-0.0460082
CAFFAREL_RESPONSE_TO_THC_24HR_5_DN	0.212296	0.0575312	0.180685	0.192167	0.0135164	0.96293	0.201901	0.0452472	0.417484	0.51285	0.038765
CAFFAREL_RESPONSE_TO_THC_24HR_5_UP	0.219149	-0.0647847	0.00887799	0.208422	0.00505187	0.991867	0.222063	-0.0221841	0.385065	0.0774998	-0.0273056
CAFFAREL_RESPONSE_TO_THC_DN	0.164779	-0.0298963	0.787352	0.154915	0.00778434	1	0.166771	-0.0106774	0.994626	0.997971	-0.0109298
CAFFAREL_RESPONSE_TO_THC_UP	0.0939034	-0.0682565	0.236476	0.0907671	-0.0453849	0.881761	0.0917588	-0.106484	0.36832	0.52686	-0.073375
CAIRO_HEPATOBLASTOMA_CLASSES_DN	0.0629939	-0.0759662	0.00747608	0.066763	-8.53287e-05	0.969924	0.0652546	-0.0316472	0.498302	0.0810571	-0.0358996
CAIRO_HEPATOBLASTOMA_CLASSES_UP	0.21414	0.0288642	0.956176	0.193149	0.0221055	0.936708	0.209763	0.011578	0.873463	0.997947	0.0208492
CAIRO_HEPATOBLASTOMA_DN	0.0286837	0.00638553	0.639129	0.0316401	-0.0719384	0.88987	0.0328949	0.133223	0.157168	0.565855	0.0225567
CAIRO_HEPATOBLASTOMA_UP	0.092824	-0.0217854	0.199403	0.0893111	0.0490343	0.84238	0.103019	0.0544508	0.032303	0.107559	0.0272332
CAIRO_LIVER_DEVELOPMENT_DN	0.0360059	0.0219022	0.888087	0.0374264	-0.00663513	0.946014	0.0356973	0.0167535	0.310658	0.847041	0.0106735
CAIRO_LIVER_DEVELOPMENT_UP	0.0846899	-0.0825519	8.15438e-05	0.0910788	-0.0235111	0.887941	0.0875713	-0.0608583	0.049977	0.000332996	-0.0556405
CAIRO_PML_TARGETS_BOUND_BY_MYC_UP	0.221277	-0.00386494	0.629978	0.212637	0.0255071	0.969924	0.213296	0.0012273	0.831822	0.968627	0.00762316
CAMPS_COLON_CANCER_COPY_NUMBER_DN	0.0776168	-0.0128372	0.518009	0.0766563	-0.0248918	0.990281	0.0813789	-0.00778371	0.923848	0.959927	-0.0151709
CAMPS_COLON_CANCER_COPY_NUMBER_UP	0.0824694	-0.0608388	0.296683	0.0825487	0.00903829	0.969924	0.0843446	-0.0266907	0.574645	0.73072	-0.0261637
CARD_MIR302A_TARGETS	0.101883	-0.121418	0.000137337	0.0985201	-0.0403804	0.945805	0.104919	-0.0866701	0.201036	0.00175578	-0.0828229
CASORELLI_ACUTE_PROMYELOCYTIC_LEUKEMIA_DN	0.148797	0.0206113	0.954478	0.133943	0.00483734	0.969924	0.149135	0.0199828	0.829243	0.997471	0.0151438
CASORELLI_ACUTE_PROMYELOCYTIC_LEUKEMIA_UP	0.128678	-0.0545429	0.0640857	0.128424	-0.0693059	0.752446	0.131877	-0.0362914	0.36039	0.230507	-0.0533801
CASORELLI_APL_SECONDARY_VS_DE_NOVO_UP	0.111806	-0.0644735	0.478741	0.111383	-0.0927589	0.929264	0.110988	-0.0846827	0.476041	0.795632	-0.0806384
CASTELLANO_NRAS_TARGETS_UP	0.0935843	0.0251971	0.726216	0.100201	0.0608935	0.973574	0.0851306	-0.0805944	0.551762	0.930168	0.00183209
CEBALLOS_TARGETS_OF_TP53_AND_MYC_DN	0.148745	0.0246164	0.512579	0.12849	-0.105582	0.599139	0.141841	-0.00453203	0.99895	0.88345	-0.0284993
CERIBELLI_GENES_INACTIVE_AND_BOUND_BY_NFY	0.00305444	-0.969943	0.231159	0.00599868	0.224919	0.853158	0.00973014	0.326019	0.626269	0.651944	-0.139668
CERVERA_SDHB_TARGETS_1_DN	0.0120111	0.00667916	0.994591	0.0183773	-0.22068	0.96293	0.0068516	-0.373561	0.926851	0.999742	-0.195854
CERVERA_SDHB_TARGETS_1_UP	0.049761	0.0219477	0.275507	0.0489953	0.0106237	0.898194	0.0547324	0.169203	0.00926479	0.0585758	0.0672581
CERVERA_SDHB_TARGETS_2	0.0342311	0.113613	0.200545	0.0381888	0.0283996	0.969924	0.0340403	0.034982	0.497193	0.586507	0.0589981
CHANDRAN_METASTASIS_DN	0.0547845	-0.0846824	0.0141009	0.0573507	-0.0105211	0.84238	0.0557708	-0.0393441	0.186706	0.0571847	-0.0448492
CHANDRAN_METASTASIS_TOP50_DN	0.141346	-0.0887587	0.000583904	0.137982	-0.117273	0.511056	0.140631	-0.0418981	0.144599	0.00265631	-0.0826432
CHANDRAN_METASTASIS_TOP50_UP	0.223642	-0.0407955	0.0384741	0.213373	-0.00772937	0.972385	0.229107	-0.0134252	0.893883	0.340135	-0.02065
CHANDRAN_METASTASIS_UP	0.103089	-0.0793202	0.016058	0.0991504	0.00186588	1	0.111	-0.00360431	0.99895	0.219311	-0.0270196
CHANG_IMMORTALIZED_BY_HPV31_DN	0.118046	0.0194423	0.99464	0.11916	-0.0310494	0.951832	0.124301	0.0732446	0.24073	0.814145	0.0205458
CHANG_IMMORTALIZED_BY_HPV31_UP	0.0396045	-0.134206	0.22619	0.0513748	0.0686326	0.694662	0.0467415	0.0369426	0.75735	0.641904	-0.00954371
CHANGOLKAR_H2AFY_TARGETS_DN	0.0327674	-0.113117	0.0161383	0.0375198	0.228073	0.760982	0.037341	-0.00435641	0.978021	0.182552	0.0368665
CHANGOLKAR_H2AFY_TARGETS_UP	0.0580438	0.0955696	0.188074	0.056251	0.00632091	0.998018	0.0601142	0.067223	0.274899	0.431246	0.0563712
CHARAFE_BREAST_CANCER_BASAL_VS_MESENCHYMAL_DN	0.0254817	-0.194361	0.0477312	0.0386257	0.0250021	0.92906	0.0224347	-0.438591	0.00132544	0.00342038	-0.20265
CHARAFE_BREAST_CANCER_BASAL_VS_MESENCHYMAL_UP	0.0669067	0.0579149	0.40236	0.0678403	-0.0236963	0.982217	0.0691353	0.0997684	0.138026	0.443961	0.0446623
CHARAFE_BREAST_CANCER_LUMINAL_VS_BASAL_DN	0.118546	0.0588799	0.014165	0.115695	0.0536041	0.96293	0.120999	0.063488	0.0227066	0.0129219	0.0586573
CHARAFE_BREAST_CANCER_LUMINAL_VS_BASAL_UP	0.0433848	-0.0867688	0.00288842	0.0422843	-0.108925	0.748267	0.0475906	0.00543855	0.932136	0.0533328	-0.0634183
CHARAFE_BREAST_CANCER_LUMINAL_VS_MESENCHYMAL_DN	0.10411	-0.00635647	0.933083	0.101096	-0.00264772	0.96293	0.104546	0.0021749	0.98637	0.999732	-0.00227643
CHARAFE_BREAST_CANCER_LUMINAL_VS_MESENCHYMAL_UP	0.0361816	0.147088	4.02377e-05	0.0401026	0.095647	0.908558	0.0378054	0.132989	0.00281341	1.50715e-05	0.125241
CHAUHAN_RESPONSE_TO_METHOXYESTRADIOL_DN	0.320031	-0.0380105	0.00421938	0.31502	-0.0567056	0.657191	0.318633	-0.0219379	0.141835	0.0155672	-0.0388847
CHAUHAN_RESPONSE_TO_METHOXYESTRADIOL_UP	0.242287	-0.0133221	0.491384	0.220671	-0.00735517	0.950047	0.226083	-0.0565596	0.416692	0.773707	-0.0257456
CHEBOTAEV_GR_TARGETS_DN	0.0234981	0.0846733	0.432312	0.0275744	0.0968428	0.664893	0.0265054	0.296436	0.00267646	0.0260604	0.159317
CHEBOTAEV_GR_TARGETS_UP	0.0149925	-0.0984626	0.144823	0.014398	-0.194738	0.969924	0.0163208	0.0535322	0.741231	0.60608	-0.0798894
CHEMNITZ_RESPONSE_TO_PROSTAGLANDIN_E2_DN	0.0414988	0.000483882	0.941639	0.0444178	-0.00785106	0.972385	0.0417887	-0.0524059	0.573018	0.972209	-0.0199244
CHEMNITZ_RESPONSE_TO_PROSTAGLANDIN_E2_UP	0.0792015	0.270799	0.0349465	0.0603514	-0.00277136	0.991867	0.068183	0.092814	0.75735	0.295722	0.120281
CHEN_ETV5_TARGETS_SERTOLI	0.035113	-0.00547098	0.836665	0.0341658	-0.0350605	0.731216	0.0344193	-0.014466	0.550792	0.902866	-0.0183325
CHEN_HOXA5_TARGETS_9HR_DN	0.0722813	0.0120509	0.542792	0.0781631	0.121064	0.679531	0.0737365	-0.0358651	0.714915	0.849453	0.0324165
CHEN_HOXA5_TARGETS_9HR_UP	0.0942137	-0.198171	0.001204	0.0954134	-0.0372997	0.785972	0.104038	-0.0520967	0.347818	0.0135512	-0.0958557
CHEN_LIVER_METABOLISM_QTL_CIS	0.0625959	0.116886	0.00141657	0.0639149	0.150345	0.54763	0.0690603	0.181071	0.014504	0.000869949	0.149434
CHEN_LUNG_CANCER_SURVIVAL	0.39543	0.0181177	0.115181	0.407227	0.05352	0.725272	0.395456	0.0374735	0.0814549	0.125483	0.0363704
CHEN_LVAD_SUPPORT_OF_FAILING_HEART_DN	0.0531632	-0.0300316	0.885402	0.0496618	-0.0883084	0.954779	0.0566097	0.14305	0.0241452	0.254412	0.0082368
CHEN_LVAD_SUPPORT_OF_FAILING_HEART_UP	0.105231	-0.150373	0.010403	0.110185	-0.0403529	0.857802	0.110015	-0.0496836	0.318323	0.0683325	-0.0801364
CHEN_METABOLIC_SYNDROM_NETWORK	0.094751	0.0118195	0.205284	0.0956639	-0.0191729	0.805255	0.0954172	0.0284859	0.0797611	0.193785	0.0070442
CHEN_NEUROBLASTOMA_COPY_NUMBER_GAINS	0.0858846	-0.0415385	0.231044	0.0886825	0.0228694	1	0.0869476	-0.0343017	0.360252	0.547384	-0.0176569
CHENG_IMPRINTED_BY_ESTRADIOL	0.0377137	-0.0744584	0.0336296	0.0376314	0.0478221	0.970029	0.0398983	0.0252429	0.953972	0.326451	-0.000464492
CHENG_RESPONSE_TO_NICKEL_ACETATE	0.123944	-0.0467588	0.127628	0.133878	0.0359705	0.999371	0.123702	-0.0383508	0.165547	0.259694	-0.0163797
CHEOK_RESPONSE_TO_HD_MTX_DN	0.0803287	-0.0888261	0.239076	0.0861385	-0.0408178	0.969924	0.0813049	-0.0914671	0.667157	0.712826	-0.0737037
CHEOK_RESPONSE_TO_MERCAPTOPURINE_AND_HD_MTX_DN	0.0369728	-0.0283036	0.900669	0.0328347	0.00282604	0.92906	0.0213072	-0.534191	0.0774187	0.484671	-0.186556
CHESLER_BRAIN_HIGHEST_EXPRESSION	0.269092	0.00641009	0.993783	0.277085	0.000724842	0.977798	0.280266	0.00738793	0.922996	0.999802	0.00484095
CHESLER_BRAIN_HIGHEST_GENETIC_VARIANCE	0.0990119	0.021258	0.577954	0.0991677	-0.0257714	0.998014	0.109773	0.110366	0.0189376	0.171691	0.0352844
CHESLER_BRAIN_QTL_CIS	0.107554	0.0790828	9.45662e-05	0.108502	0.0413001	0.805255	0.108418	0.0747446	0.0533855	0.000367725	0.0650425
CHIANG_LIVER_CANCER_SUBCLASS_CTNNB1_DN	0.0617834	0.0639228	0.0422363	0.0598671	0.00748226	0.969924	0.0653134	0.117892	0.00151776	0.00358076	0.0630991
CHIANG_LIVER_CANCER_SUBCLASS_CTNNB1_UP	0.00987732	0.126246	0.129393	0.0116196	0.264244	0.689164	0.0114121	0.181307	0.40385	0.354651	0.190599
CHIANG_LIVER_CANCER_SUBCLASS_INTERFERON_DN	0	NA	0.871261	0	#NAME?	0.918473	0	NA	0.939525	0.996872	NA
CHIANG_LIVER_CANCER_SUBCLASS_POLYSOMY7_DN	0.0383495	-0.242011	0.011789	0.0445631	0.0507223	0.939459	0.0390846	-0.231724	0.0539339	0.0214883	-0.141004
CHIANG_LIVER_CANCER_SUBCLASS_POLYSOMY7_UP	0.0145791	0.173379	0.0377916	0.0174068	0.142226	0.901015	0.0154268	0.256789	0.376253	0.190265	0.190798
CHIANG_LIVER_CANCER_SUBCLASS_PROLIFERATION_DN	0.0135174	0.0231869	0.681134	0.0181633	0.139108	0.969924	0.0136238	-0.0819806	0.939807	0.987323	0.0267714
CHIANG_LIVER_CANCER_SUBCLASS_PROLIFERATION_UP	0.0701853	-0.0111433	0.752355	0.065268	-0.0301847	0.853158	0.0660606	0.00713914	0.693344	0.951189	-0.0113963
CHIANG_LIVER_CANCER_SUBCLASS_UNANNOTATED_DN	0.194974	0.00983242	0.7034	0.193211	0.0374441	0.961156	0.194057	0.0032657	0.945313	0.989269	0.0168474
CHIANG_LIVER_CANCER_SUBCLASS_UNANNOTATED_UP	0.0752842	-0.097418	0.066944	0.0769975	-0.0287118	0.969924	0.0822929	0.0389059	0.358925	0.27557	-0.0290746
CHIARADONNA_NEOPLASTIC_TRANSFORMATION_CDC25_DN	0.120323	0.0447122	0.0525498	0.121614	-0.00802209	0.935834	0.126562	0.0861483	0.0286005	0.0409676	0.0409461
CHIARADONNA_NEOPLASTIC_TRANSFORMATION_CDC25_UP	0.140945	0.0143365	0.700341	0.142382	0.0843834	0.895602	0.140374	0.0207329	0.808412	0.968348	0.0398176
CHIARADONNA_NEOPLASTIC_TRANSFORMATION_KRAS_CDC25_DN	0.099624	-0.104699	0.438741	0.120782	-0.0128088	0.950047	0.102924	-0.0578701	0.954787	0.933581	-0.0584594
CHIARADONNA_NEOPLASTIC_TRANSFORMATION_KRAS_CDC25_UP	0.26332	0.0734043	0.0107491	0.242819	0.022013	0.935834	0.275862	0.109121	0.00108146	0.000845673	0.0681795
CHIARADONNA_NEOPLASTIC_TRANSFORMATION_KRAS_DN	0.0733575	-0.029214	0.723516	0.0753852	-0.119462	0.594192	0.0744494	0.0121412	0.914091	0.931428	-0.0455117
CHIARADONNA_NEOPLASTIC_TRANSFORMATION_KRAS_UP	0.153818	0.00338022	0.851746	0.138034	-0.0406356	0.92401	0.139191	-0.116445	0.190169	0.703898	-0.0512335
CHIARETTI_ACUTE_LYMPHOBLASTIC_LEUKEMIA_ZAP70	0.019075	-0.0917162	0.113911	0.021698	-0.219052	0.733064	0.0196812	-0.0573979	0.971279	0.540739	-0.122722
CHIARETTI_T_ALL_REFRACTORY_TO_THERAPY	0.0750485	-0.047985	0.933083	0.0719834	-0.0534797	0.991867	0.0781137	0.0580187	0.760546	0.994442	-0.014482
CHIBA_RESPONSE_TO_TSA	0.247699	-0.122948	0.000884524	0.252572	-0.108737	0.573548	0.257609	-0.0322338	0.415536	0.0095473	-0.0879726
CHIBA_RESPONSE_TO_TSA_UP	0.177187	0.0729888	0.0208211	0.171921	-0.0128172	0.998196	0.180577	0.0508847	0.0972259	0.0534496	0.0370188
CHICAS_RB1_TARGETS_CONFLUENT	0.108119	0.029741	0.0456011	0.105368	-0.0213857	0.969924	0.106786	0.0291111	0.287465	0.18934	0.0124888
CHICAS_RB1_TARGETS_GROWING	0.0815278	0.106878	0.952519	0.0628349	0.00750929	1	0.0794099	0.0852642	0.729342	0.993855	0.0665504
CHICAS_RB1_TARGETS_LOW_SERUM	0.256985	-0.0304693	0.0593124	0.262526	-0.0358455	0.969924	0.22694	-0.0563712	0.144338	0.143388	-0.0408953
CHICAS_RB1_TARGETS_SENESCENT	0.0950038	-0.0196838	0.118068	0.0874922	-0.0313804	0.950047	0.0965738	-0.00115664	0.984937	0.621932	-0.017407
CHIN_BREAST_CANCER_COPY_NUMBER_UP	0.128086	0.111188	0.0163701	0.107975	-0.028442	0.950047	0.12982	0.12016	0.00384079	0.00346569	0.0676353
CHNG_MULTIPLE_MYELOMA_HYPERPLOID_DN	0.0863168	-0.0494896	0.201877	0.0821887	-0.0659268	0.831401	0.093767	0.0084167	0.970327	0.726639	-0.0356666
CHNG_MULTIPLE_MYELOMA_HYPERPLOID_UP	0.610258	-0.0144869	0.014165	0.628702	0.0120791	0.887941	0.600221	-0.012042	0.254865	0.0744761	-0.00481659
CHO_NR4A1_TARGETS	0.0773126	-0.0237838	0.954478	0.0769656	0.0472575	0.962255	0.0810137	0.097755	0.439694	0.936028	0.0404096
CHOI_ATL_STAGE_PREDICTOR	0.227447	0.00990542	0.994049	0.226868	0.0807994	0.608484	0.223883	-0.0220255	0.643547	0.92979	0.0228931
CHOW_RASSF1_TARGETS_DN	0.216914	0.0822779	0.0088556	0.213976	0.0147014	0.991012	0.204988	0.026414	0.836355	0.132046	0.0411311
CHOW_RASSF1_TARGETS_UP	0.0951179	0.0336268	0.933083	0.0910818	0.0984063	0.928654	0.0915395	0.0461986	0.627478	0.975953	0.0594106
CHUNG_BLISTER_CYTOTOXICITY_DN	0.0334313	0.0899933	0.0745557	0.0348653	0.021581	0.908558	0.0310878	0.0391587	0.864908	0.460625	0.0502444
CHUNG_BLISTER_CYTOTOXICITY_UP	0.118107	0.032374	0.742987	0.109543	-0.00270168	1	0.114191	0.027866	0.745411	0.977775	0.0191794
CHYLA_CBFA2T3_TARGETS_DN	0.0247715	0.143327	0.002404	0.0255616	0.0100995	0.998014	0.0232304	0.0337151	0.415719	0.0317044	0.0623806
CHYLA_CBFA2T3_TARGETS_UP	0.04629	0.0430237	0.0500776	0.0471587	-0.00744623	0.951371	0.048817	0.0790535	0.000695977	0.00213888	0.0382103
CLASPER_LYMPHATIC_VESSELS_DURING_METASTASIS_DN	0.0596481	0.0568913	0.401762	0.0792922	0.377897	0.821821	0.074739	0.255226	0.0305955	0.163168	0.230005
COATES_MACROPHAGE_M1_VS_M2_DN	0.0434271	-0.0744304	0.116636	0.0516535	-0.0172464	0.865019	0.0447687	-0.021388	0.829605	0.548823	-0.0376883
COATES_MACROPHAGE_M1_VS_M2_UP	0.0294213	0.000627304	0.487792	0.0333222	-0.0610775	0.841467	0.029724	-0.0566074	0.860965	0.912162	-0.0390192
COLDREN_GEFITINIB_RESISTANCE_DN	0.0368327	0.276391	5.59237e-06	0.0394986	0.146404	0.643123	0.041764	0.301591	5.19106e-06	6.17701e-09	0.241462
COLDREN_GEFITINIB_RESISTANCE_UP	0.0441843	-0.130066	0.000448567	0.0455646	-0.0780025	0.62446	0.0466927	-0.0557277	0.119834	0.00216061	-0.087932
COLIN_PILOCYTIC_ASTROCYTOMA_VS_GLIOBLASTOMA_DN	0.260586	-0.00464565	0.810677	0.255903	-0.0280057	0.990281	0.263454	0.0199351	0.626269	0.967346	-0.00423876
COLIN_PILOCYTIC_ASTROCYTOMA_VS_GLIOBLASTOMA_UP	0.0833961	0.0039124	0.884513	0.0830667	0.00770226	0.969924	0.0846947	0.0149854	0.478792	0.938821	0.00886669
COLINA_TARGETS_OF_4EBP1_AND_4EBP2	0.0802142	0.0431252	0.128196	0.0766246	-0.0371789	0.942489	0.0754841	-0.0249023	0.636568	0.527229	-0.0063187
COLLER_MYC_TARGETS_UP	0.244728	-0.0254021	0.693142	0.20699	-0.0564596	0.972385	0.245436	0.0224156	0.978629	0.991181	-0.0198154
CONCANNON_APOPTOSIS_BY_EPOXOMICIN_DN	0.0935396	0.0459037	0.865167	0.08637	-0.00873105	0.969924	0.0791064	-0.0552315	0.857328	0.995341	-0.0060196
CONCANNON_APOPTOSIS_BY_EPOXOMICIN_UP	0.103013	-0.0341585	0.0742008	0.101993	-0.0123129	0.901015	0.10209	-0.0434765	0.684011	0.40442	-0.0299826
CONRAD_STEM_CELL	0.0548857	-0.103281	0.0911218	0.0526373	-0.0410885	0.936688	0.0587417	-0.00585705	0.804945	0.499043	-0.0500754
CORRE_MULTIPLE_MYELOMA_DN	0.0389462	-0.126445	0.0062556	0.0346315	-0.203888	0.507307	0.0439541	0.0164424	0.893505	0.068245	-0.10463
CORRE_MULTIPLE_MYELOMA_UP	0.0308356	0.278685	0.00483997	0.0299203	0.0898934	0.882721	0.0283316	0.211442	0.145648	0.0221713	0.19334
COULOUARN_TEMPORAL_TGFB1_SIGNATURE_DN	0.067784	-0.044407	0.202185	0.0649607	-0.131914	0.770694	0.0786464	0.113983	0.0743882	0.178416	-0.0207793
COULOUARN_TEMPORAL_TGFB1_SIGNATURE_UP	0.0943788	-0.116871	0.0558991	0.105372	0.0267123	0.950047	0.108095	0.0585196	0.715454	0.365428	-0.0105462
COWLING_MYCN_TARGETS	0.0524167	0.183575	0.0257151	0.0530153	-0.010658	0.985168	0.0460824	0.0497972	0.826856	0.258443	0.0742382
CREIGHTON_AKT1_SIGNALING_VIA_MTOR_DN	0.275136	-0.0494625	0.0103687	0.272379	-0.0653649	0.643123	0.280876	-0.0261486	0.649757	0.0920581	-0.046992
CREIGHTON_AKT1_SIGNALING_VIA_MTOR_UP	0.164777	0.0794463	0.0284193	0.157146	0.0323873	0.983803	0.161146	0.0400246	0.401797	0.174839	0.0506194
CREIGHTON_ENDOCRINE_THERAPY_RESISTANCE_1	0.0839491	0.0209593	0.55689	0.0814876	0.0414994	0.689164	0.0830241	0.0291526	0.498356	0.769287	0.0305371
CREIGHTON_ENDOCRINE_THERAPY_RESISTANCE_2	0.0249515	0.0211385	0.362341	0.0244798	-0.00753301	0.887941	0.0250366	0.000931151	0.927105	0.877375	0.00484556
CREIGHTON_ENDOCRINE_THERAPY_RESISTANCE_3	0.0616638	0.0314319	0.136576	0.0657034	0.0500438	0.826428	0.0648459	0.0700555	0.01841	0.0545461	0.0505104
CREIGHTON_ENDOCRINE_THERAPY_RESISTANCE_4	0.0635645	0.0441664	0.0199116	0.0631787	0.0820669	0.406939	0.0633604	0.053432	0.115144	0.0301515	0.0598884
CREIGHTON_ENDOCRINE_THERAPY_RESISTANCE_5	0.0655738	-0.00652285	0.913095	0.0663856	0.0186685	0.991867	0.0716399	0.0546937	0.238112	0.800241	0.0222798
CROMER_METASTASIS_DN	0.143157	0.0260293	0.127469	0.135026	-0.0333775	0.950047	0.148682	0.099463	0.000318717	0.00242386	0.0307049
CROMER_METASTASIS_UP	0.076447	-0.0269028	0.523016	0.0797414	0.049075	0.887736	0.0734826	-0.0934479	0.193991	0.567838	-0.0237586
CROMER_TUMORIGENESIS_DN	0.0649412	0.114417	0.112141	0.070179	0.0938386	0.841878	0.0681739	0.143752	0.235419	0.267847	0.117336
CROMER_TUMORIGENESIS_UP	0.112016	0.19975	0.00014495	0.0961639	-0.0199624	0.950047	0.113917	0.237876	0.00105108	2.0373e-05	0.139221
CROONQUIST_IL6_DEPRIVATION_DN	0.104471	0.362764	0.296016	0.0610408	0.0572125	0.99909	0.0651978	0.0116709	0.697169	0.788776	0.143882
CROONQUIST_NRAS_SIGNALING_DN	0.115808	0.344343	0.646405	0.0630309	-0.0362575	0.995918	0.067076	-0.13243	0.682636	0.949331	0.0585516
CROONQUIST_NRAS_SIGNALING_UP	0.0493135	-0.0151731	0.954717	0.0690281	0.227471	0.770694	0.0550921	0.054787	0.571258	0.942511	0.0890284
CROONQUIST_NRAS_VS_STROMAL_STIMULATION_DN	0.163607	-0.00289556	0.640298	0.146186	-0.0920693	0.853158	0.154589	-0.0475797	0.376253	0.787967	-0.0475149
CROONQUIST_NRAS_VS_STROMAL_STIMULATION_UP	0.0405693	0.101846	0.127469	0.0484105	0.450527	0.451646	0.0579534	0.389432	2.99741e-05	0.000176559	0.313935
CROONQUIST_STROMAL_STIMULATION_UP	0.195751	-0.0780968	0.0251158	0.184521	-0.145195	0.623079	0.19197	-0.101353	0.157376	0.0616813	-0.108215
CUI_GLUCOSE_DEPRIVATION	0.129175	-0.0354925	0.96942	0.136759	0.00831728	0.969924	0.128231	-0.0337918	0.883921	0.999081	-0.0203223
CUI_TCF21_TARGETS_2_DN	0.0622585	-0.0270772	0.687925	0.0614458	-0.0246891	0.975393	0.0696937	0.0862072	0.356744	0.826269	0.0114803
CUI_TCF21_TARGETS_2_UP	0.105126	0.0479433	0.11848	0.093452	-0.00585035	0.94894	0.101517	0.00978779	0.74616	0.549407	0.0172936
CUI_TCF21_TARGETS_DN	0.0475322	0.0145795	0.82803	0.0467284	0.0189032	0.991867	0.051877	0.0952053	0.0807914	0.490505	0.042896
CUI_TCF21_TARGETS_UP	0.0267314	0.0159155	0.683192	0.0194104	-0.203703	0.85333	0.0218761	-0.0637565	0.723532	0.943065	-0.0838481
DACOSTA_ERCC3_ALLELE_XPCS_VS_TTD_DN	0.0565074	-0.00778024	0.976519	0.0567708	0.116504	0.528983	0.0567497	0.0355235	0.394263	0.785605	0.0480824
DACOSTA_ERCC3_ALLELE_XPCS_VS_TTD_UP	0.0493204	-0.0431642	0.807335	0.0450763	-0.208757	0.826428	0.0558391	0.117539	0.636784	0.944194	-0.0447941
DACOSTA_UV_RESPONSE_VIA_ERCC3_COMMON_DN	0.0611247	-0.0801738	0.093085	0.0555423	0.0256933	0.89594	0.0688275	-0.0192929	0.851009	0.507079	-0.0245912
DACOSTA_UV_RESPONSE_VIA_ERCC3_COMMON_UP	0.0884172	-0.0532225	0.0103687	0.0810358	-0.160387	0.694662	0.0830294	-0.115932	0.0398447	0.0121732	-0.109847
DACOSTA_UV_RESPONSE_VIA_ERCC3_DN	0.0766097	-0.0911365	0.0936834	0.0712325	0.0398432	0.917256	0.083242	-0.0433924	0.954019	0.543486	-0.0315619
DACOSTA_UV_RESPONSE_VIA_ERCC3_TTD_DN	0.0578869	-0.188311	0.0173014	0.0592975	0.0111682	1	0.0698232	0.00330167	0.562979	0.159321	-0.0579471
DACOSTA_UV_RESPONSE_VIA_ERCC3_TTD_UP	0.0980606	-0.0148106	0.237402	0.0881689	-0.132642	0.511056	0.0911591	-0.0724702	0.0479038	0.11274	-0.0733076
DACOSTA_UV_RESPONSE_VIA_ERCC3_UP	0.122876	-0.0141931	0.111295	0.120394	-0.0685898	0.611254	0.11556	-0.0405248	0.0159147	0.0337156	-0.0411026
DACOSTA_UV_RESPONSE_VIA_ERCC3_XPCS_DN	0.0469599	-0.125665	0.0460821	0.04259	-0.0454155	1	0.055119	0.0304855	0.858416	0.373678	-0.046865
DACOSTA_UV_RESPONSE_VIA_ERCC3_XPCS_UP	0.0888849	-0.104223	0.195824	0.076908	-0.198497	0.623079	0.0884028	-0.0493029	0.415508	0.427263	-0.117341
DAIRKEE_CANCER_PRONE_RESPONSE_BPA	0.127362	0.00539957	0.956807	0.112977	0.0536739	0.918473	0.119541	0.00503308	0.970375	0.999402	0.0213689
DAIRKEE_CANCER_PRONE_RESPONSE_BPA_E2	0.23288	-0.0133551	0.248913	0.219158	-0.00712178	0.9982	0.233204	0.01158	0.817369	0.784877	-0.00296564
DAIRKEE_CANCER_PRONE_RESPONSE_E2	0.0825262	0.219752	0.000212145	0.0802049	0.159703	0.513941	0.0762294	0.108236	0.190169	0.0014499	0.162564
DANG_BOUND_BY_MYC	0.208925	-0.0200737	0.0257501	0.205326	-0.0188522	0.901015	0.209741	-0.00355243	0.452073	0.167217	-0.0141594
DANG_MYC_TARGETS_DN	0.168044	-0.0409622	0.18277	0.168542	-0.0314675	0.868656	0.176057	-0.00397933	0.85622	0.677877	-0.0254697
DANG_MYC_TARGETS_UP	0.345508	-0.0122066	0.42007	0.326341	-0.00381133	0.981018	0.34087	-0.0103924	0.584673	0.827864	-0.00880344
DANG_REGULATED_BY_MYC_DN	0.150631	-0.0266435	0.414625	0.147984	-0.0389454	0.879285	0.150192	-0.00735495	0.925086	0.903041	-0.0243146
DANG_REGULATED_BY_MYC_UP	0.166791	0.0124531	0.98579	0.154203	0.0483757	0.864725	0.163291	-0.0170094	0.463425	0.932324	0.0146065
DARWICHE_PAPILLOMA_PROGRESSION_RISK	0.0295409	0.00128297	0.844711	0.0312897	0.138133	0.916873	0.0310376	0.097706	0.315512	0.831293	0.0790407
DARWICHE_PAPILLOMA_RISK_HIGH_DN	0.0548483	-0.0190315	0.166771	0.0566937	-0.0456616	0.678276	0.0529046	-0.0396601	0.022364	0.0628836	-0.0347844
DARWICHE_PAPILLOMA_RISK_HIGH_UP	0.184701	0.0197958	0.142823	0.175207	-0.0221168	0.969924	0.183761	0.000755264	0.956963	0.671079	-0.000521908
DARWICHE_PAPILLOMA_RISK_LOW_DN	0.0502623	-0.0583	0.0144627	0.052399	-0.0805674	0.592985	0.0489153	-0.0504476	0.0335177	0.0121886	-0.063105
DARWICHE_PAPILLOMA_RISK_LOW_UP	0.180787	0.0273911	0.0709431	0.173705	-0.00706898	0.983803	0.180354	0.00620303	0.928963	0.484873	0.00884171
DARWICHE_SKIN_TUMOR_PROMOTER_DN	0.0760423	0.00516777	0.87302	0.0730812	-0.0353743	0.901015	0.0744195	-0.0455193	0.15096	0.64133	-0.0252419
DARWICHE_SKIN_TUMOR_PROMOTER_UP	0.16452	0.0117827	0.726988	0.16102	-0.0222004	0.878385	0.160629	-0.00732481	0.423353	0.855251	-0.00591417
DARWICHE_SQUAMOUS_CELL_CARCINOMA_DN	0.0465078	-0.0393759	0.525559	0.0485654	-0.0618057	0.669949	0.0454165	-0.0715032	0.0443455	0.215639	-0.0575616
DARWICHE_SQUAMOUS_CELL_CARCINOMA_UP	0.18966	0.00465112	0.62099	0.180874	-0.0421915	0.954779	0.188926	-0.000308007	0.763268	0.953598	-0.0126161
DASU_IL6_SIGNALING_SCAR_UP	0.0984948	-0.0455705	0.458773	0.0855621	-0.0551562	0.969924	0.115989	0.115381	0.282193	0.656412	0.00488484
DASU_IL6_SIGNALING_UP	0.139606	-0.100562	0.0011021	0.130643	-0.0717053	0.511056	0.143785	-0.02798	0.358594	0.00922919	-0.0667492
DAUER_STAT3_TARGETS_DN	0.0726341	0.00313763	0.885402	0.0682364	-0.0798488	0.569709	0.0661919	-0.0401102	0.512109	0.844606	-0.0389405
DAUER_STAT3_TARGETS_UP	0.0900311	-0.247963	0.000181153	0.0947813	-0.163436	0.577327	0.0966665	-0.0892698	0.146729	0.00112821	-0.166889
DAVICIONI_MOLECULAR_ARMS_VS_ERMS_DN	0.067926	0.0494232	0.118939	0.0681844	0.00777093	0.996012	0.0693327	0.0390531	0.462783	0.445122	0.0320824
DAVICIONI_MOLECULAR_ARMS_VS_ERMS_UP	0.0509258	-0.00651952	0.691881	0.0521816	-0.00946357	1	0.0525455	0.0120474	0.925086	0.989364	-0.0013119
DAVICIONI_PAX_FOXO1_SIGNATURE_IN_ARMS_UP	0.0728811	-0.108156	0.0281346	0.0858958	0.0561595	0.938843	0.0743424	-0.0856761	0.0906625	0.0604483	-0.045891
DAVICIONI_RHABDOMYOSARCOMA_PAX_FOXO1_FUSION_UP	0.0728744	0.0148213	0.666331	0.0764296	-0.020063	0.991867	0.0723925	-0.0385234	0.820001	0.975623	-0.0145884
DAVICIONI_TARGETS_OF_PAX_FOXO1_FUSIONS_DN	0.0435357	-0.0788389	0.0822306	0.0451094	0.0118354	0.983803	0.0470808	0.0187647	0.864908	0.50355	-0.0160796
DAVICIONI_TARGETS_OF_PAX_FOXO1_FUSIONS_UP	0.0972991	-0.00280161	0.657628	0.0947418	-0.053471	0.950047	0.100653	0.0158656	0.448685	0.863558	-0.013469
DAVIES_MULTIPLE_MYELOMA_VS_MGUS_DN	0.113984	-0.0339207	0.221087	0.107415	0.0130083	0.931093	0.121426	0.115865	0.282193	0.458618	0.0316509
DAWSON_METHYLATED_IN_LYMPHOMA_TCL1	0.0241393	-0.209261	0.0257929	0.031136	0.010699	0.969924	0.0253847	-0.109361	0.462382	0.178178	-0.102641
DAZARD_RESPONSE_TO_UV_NHEK_DN	0.047427	-0.106165	0.0742993	0.0374368	-0.114196	0.991867	0.0529425	0.00407782	0.83937	0.473534	-0.0720945
DAZARD_RESPONSE_TO_UV_NHEK_UP	0.270642	-0.0207883	0.0594091	0.254655	-0.132756	0.793411	0.258312	-0.0416618	0.01383	0.0229735	-0.0650688
DAZARD_RESPONSE_TO_UV_SCC_DN	0.0683928	-0.134781	0.0162251	0.0661363	-0.0785393	0.781955	0.0773311	0.027367	0.883921	0.174645	-0.0619843
DAZARD_RESPONSE_TO_UV_SCC_UP	0.210262	0.0134506	0.462178	0.201586	-0.0762424	0.92906	0.208142	-0.0110471	0.992256	0.944632	-0.024613
DAZARD_UV_RESPONSE_CLUSTER_G1	0.353774	-0.00811335	0.576453	0.36299	-0.0166295	0.950047	0.337984	-0.0168771	0.419496	0.816139	-0.0138733
DAZARD_UV_RESPONSE_CLUSTER_G6	0.0539888	-0.0670246	0.127469	0.0419155	-0.0800332	0.969924	0.0569459	-0.0515689	0.928963	0.632354	-0.0662089
DE_YY1_TARGETS_DN	0.134664	-0.0201924	0.458348	0.1215	0.0207516	0.991867	0.139617	-0.0407905	0.860965	0.930743	-0.0134104
DEBIASI_APOPTOSIS_BY_REOVIRUS_INFECTION_DN	0.0546807	-0.0198551	0.70828	0.0556341	-0.00107629	0.92906	0.0564438	-0.023459	0.846961	0.978379	-0.0147968
DEBIASI_APOPTOSIS_BY_REOVIRUS_INFECTION_UP	0.0979276	-0.0298289	0.395154	0.0926648	-0.069418	0.879285	0.0945453	-0.0378318	0.237747	0.545437	-0.0456929
DELACROIX_RAR_BOUND_ES	0.0792418	-0.0211653	0.14988	0.0781531	-0.064599	0.513941	0.0790311	-0.0306569	0.255313	0.248718	-0.0388071
DELACROIX_RAR_TARGETS_DN	0.103851	0.0349788	0.79751	0.0899487	0.0402019	0.969924	0.111692	0.0469194	0.61123	0.959617	0.0407
DELACROIX_RAR_TARGETS_UP	0.15107	-0.108365	0.0880986	0.178758	0.025492	0.969924	0.157141	-0.0285363	0.892918	0.525204	-0.0371363
DELACROIX_RARG_BOUND_MEF	0.120181	-0.0390433	0.0945722	0.120524	-0.0610109	0.868792	0.124647	0.0128648	0.668832	0.44567	-0.0290632
DELASERNA_MYOD_TARGETS_DN	0.114761	-0.0468547	0.0108745	0.111734	-0.0914863	0.54763	0.118049	-0.015614	0.462382	0.0668279	-0.0513183
DELASERNA_MYOD_TARGETS_UP	0.0647806	0.0920273	0.0276794	0.0613141	0.0692006	0.904435	0.0694279	0.192619	3.09983e-06	1.17479e-05	0.117949
DELPUECH_FOXO3_TARGETS_DN	0.112202	0.128361	0.292816	0.0908963	-0.0117517	0.991867	0.0944252	0.00735151	0.961314	0.862642	0.0413202
DELPUECH_FOXO3_TARGETS_UP	0.102281	-0.0616991	0.10188	0.100255	-0.131971	0.947563	0.107428	0.0326079	0.387014	0.36202	-0.0536873
DELYS_THYROID_CANCER_DN	0.0455291	-0.0493227	0.288093	0.0477068	-0.0396021	0.908558	0.0452508	-0.0632281	0.381602	0.595045	-0.0507176
DELYS_THYROID_CANCER_UP	0.104359	0.082651	0.00403421	0.106232	0.0690572	0.802535	0.110804	0.136625	2.55111e-07	1.98741e-07	0.0961112
DEMAGALHAES_AGING_UP	0.23809	0.00650039	0.874473	0.232617	-0.0029621	0.949915	0.242044	0.0418577	0.347183	0.869937	0.015132
DEN_INTERACT_WITH_LCA5	0.426378	-0.0658642	0.00548142	0.434597	0.00266803	0.998014	0.433668	-0.0349288	0.186164	0.0322045	-0.0327083
DER_IFN_ALPHA_RESPONSE_UP	0.179167	-0.00640537	0.773057	0.172755	-0.0350672	0.733064	0.168393	-0.0766754	0.0925341	0.434917	-0.0393827
DER_IFN_BETA_RESPONSE_UP	0.188087	-0.0294921	0.199031	0.17858	-0.0528872	0.875979	0.180772	-0.0806985	0.0639244	0.173943	-0.0543592
DER_IFN_GAMMA_RESPONSE_UP	0.190478	-0.0329204	0.274323	0.195171	0.00435054	0.770694	0.17796	-0.114838	0.0469041	0.161202	-0.0478026
DESERT_PERIPORTAL_HEPATOCELLULAR_CARCINOMA_SUBCLASS_UP	0.0186424	0.284484	0.00179561	0.0225296	0.173667	0.560971	0.0180449	0.132833	0.106412	0.00556506	0.196995
DESERT_PERIVENOUS_HEPATOCELLULAR_CARCINOMA_SUBCLASS_UP	0.0632809	0.00709032	0.952597	0.0626949	-0.0236027	0.947863	0.0627108	-0.0131771	0.583977	0.972749	-0.00989646
DESERT_STEM_CELL_HEPATOCELLULAR_CARCINOMA_SUBCLASS_UP	0.170537	-0.0303145	0.0720669	0.16736	0.0321016	0.950047	0.174937	0.0109424	0.856286	0.460786	0.00424321
DEURIG_T_CELL_PROLYMPHOCYTIC_LEUKEMIA_DN	0.059103	-0.0286617	0.59014	0.0560389	-0.0312846	0.898194	0.0634858	0.0241334	0.502381	0.851746	-0.0119376
DEURIG_T_CELL_PROLYMPHOCYTIC_LEUKEMIA_UP	0.0858103	0.0373939	0.0381951	0.083537	-0.00278946	0.969924	0.0853524	0.0436479	0.196667	0.131392	0.0260841
DIAZ_CHRONIC_MEYLOGENOUS_LEUKEMIA_DN	0.141239	0.00529925	0.910669	0.13397	-0.0675105	0.592985	0.137972	0.00134612	0.693103	0.922846	-0.0202884
DIAZ_CHRONIC_MEYLOGENOUS_LEUKEMIA_UP	0.226005	-0.0148985	0.222272	0.218303	-0.00332049	0.980188	0.229999	0.0165491	0.873463	0.767965	-0.00055661
DING_LUNG_CANCER_EXPRESSION_BY_COPY_NUMBER	0.0757338	0.0751548	0.00171291	0.0728261	0.0822676	0.406939	0.0781042	0.0572435	0.497193	0.0141079	0.0715553
DING_LUNG_CANCER_MUTATED_SIGNIFICANTLY	0.0649306	0.0246982	0.927467	0.0738735	0.190363	0.450607	0.0646472	-0.0487105	0.73354	0.883296	0.0554502
DIRMEIER_LMP1_RESPONSE_EARLY	0.239981	-0.0619312	0.00501546	0.217388	-0.165088	0.451646	0.235007	-0.0765997	0.529815	0.0364127	-0.101206
DIRMEIER_LMP1_RESPONSE_LATE_DN	0.404399	-0.0167635	0.111858	0.390527	-0.0647382	0.513941	0.387847	-0.0297908	0.141835	0.141663	-0.0370975
DIRMEIER_LMP1_RESPONSE_LATE_UP	0.100796	-0.101055	0.000114897	0.100306	-0.10537	0.643123	0.106122	-0.0018176	0.992078	0.0040938	-0.069414
DITTMER_PTHLH_TARGETS_DN	0.138751	0.055954	0.00281601	0.131809	0.00688367	0.898194	0.142291	0.0205133	0.81607	0.0542821	0.0277837
DITTMER_PTHLH_TARGETS_UP	0.201595	-0.00971388	0.48037	0.198276	-0.000673325	0.935834	0.203638	0.000187369	0.809933	0.917791	-0.00339995
DOANE_BREAST_CANCER_CLASSES_DN	0.134086	-0.044043	0.922232	0.143673	0.0752923	0.821821	0.142341	0.097199	0.419496	0.891004	0.0428161
DOANE_BREAST_CANCER_CLASSES_UP	0.021996	0.13758	0.224757	0.021762	-0.186719	0.864349	0.0249327	0.209475	0.113829	0.267033	0.0534454
DOANE_BREAST_CANCER_ESR1_DN	0.045821	0.210843	0.0343933	0.0485934	0.386369	0.516774	0.050087	0.29413	0.0775835	0.0403712	0.297114
DOANE_BREAST_CANCER_ESR1_UP	0.03656	-0.127592	0.0590588	0.0400995	-0.00978498	0.950047	0.0416758	0.03945	0.399912	0.269385	-0.0326423
DOANE_RESPONSE_TO_ANDROGEN_DN	0.0759541	-0.0364584	0.0293436	0.0756604	-0.00237679	0.991867	0.0779801	-0.0307546	0.309058	0.151192	-0.0231966
DOANE_RESPONSE_TO_ANDROGEN_UP	0.0474858	0.0371811	0.669933	0.0435013	-0.00392135	1	0.0526278	0.11545	0.0381272	0.29099	0.0495698
DODD_NASOPHARYNGEAL_CARCINOMA_DN	0.155755	0.0126072	0.943053	0.140887	0.0176698	0.901015	0.150786	0.00818621	0.462783	0.931538	0.0128211
DODD_NASOPHARYNGEAL_CARCINOMA_UP	0.0549789	0.00109739	0.933083	0.0605274	-0.00404791	0.991867	0.057526	0.0529387	0.141835	0.668416	0.0166627
DORN_ADENOVIRUS_INFECTION_12HR_DN	0.211558	-0.0800744	0.0167411	0.182662	-0.174715	0.513941	0.211087	-0.0390337	0.592921	0.103091	-0.0979409
DORN_ADENOVIRUS_INFECTION_12HR_UP	0.0939197	-0.0421941	0.445372	0.0920999	-0.00699627	0.969924	0.108781	0.0616337	0.502817	0.802061	0.00414779
DORN_ADENOVIRUS_INFECTION_24HR_DN	0.191636	-0.0880795	0.00319653	0.176372	-0.11364	0.511056	0.19525	-0.0619944	0.397249	0.0228944	-0.0879048
DORN_ADENOVIRUS_INFECTION_32HR_DN	0.209066	-0.098498	0.013713	0.186855	-0.139617	0.760982	0.23134	0.0243857	0.860965	0.151074	-0.0712432
DORN_ADENOVIRUS_INFECTION_48HR_DN	0.199376	-0.105529	0.0198911	0.181422	-0.128051	0.793322	0.224614	0.0378811	0.820139	0.191497	-0.0652329
DORSAM_HOXA9_TARGETS_DN	0.221651	-0.0705903	0.00322144	0.201922	-0.10649	0.733064	0.223573	-0.0386275	0.361008	0.0281681	-0.0719025
DORSAM_HOXA9_TARGETS_UP	0.132984	-0.0816633	0.0365339	0.123903	-0.0829399	0.990599	0.136166	-0.0470978	0.417663	0.211293	-0.070567
DORSEY_GAB2_TARGETS	0.0846891	0.0309793	0.606396	0.0810651	0.0702978	0.969924	0.0755648	-0.0567723	0.679461	0.934279	0.014835
DOUGLAS_BMI1_TARGETS_DN	0.0417681	-0.0390577	0.903628	0.0476822	0.0204239	0.969924	0.0403796	-0.0551296	0.557901	0.963952	-0.0245878
DOUGLAS_BMI1_TARGETS_UP	0.056718	-0.0303406	0.110513	0.0589228	0.0189627	0.955046	0.0607137	0.0479693	0.43631	0.405938	0.0121971
DUAN_PRDM5_TARGETS	0.0224431	-0.0889805	0.380606	0.026191	-0.102564	0.879285	0.0231793	0.00417165	0.761478	0.841384	-0.0624575
DUNNE_TARGETS_OF_AML1_MTG8_FUSION_UP	0.0621645	-0.0031022	0.595018	0.0760516	0.156869	0.643123	0.0563956	-0.00928879	0.748911	0.868531	0.0481593
DURAND_STROMA_NS_UP	0.0195705	-0.101967	0.280124	0.0244936	0.0671568	0.969924	0.0221852	0.0783478	0.714055	0.773009	0.0145126
DURAND_STROMA_S_UP	0.0174402	-0.0452363	0.946148	0.0216538	-0.0440091	0.958906	0.0209913	0.106292	0.155773	0.688402	0.0056821
DURCHDEWALD_SKIN_CARCINOGENESIS_DN	0.0863413	-0.0150213	0.653596	0.0810612	0.0124694	0.963657	0.0953476	0.0589784	0.26355	0.731746	0.0188088
DURCHDEWALD_SKIN_CARCINOGENESIS_UP	0.0417738	-0.0396332	0.484813	0.0438559	-0.0633857	0.970443	0.0382731	-0.113878	0.137417	0.484185	-0.072299
DUTERTRE_ESTRADIOL_RESPONSE_24HR_DN	0.081875	-0.0880576	0.148639	0.0848355	-0.00513363	0.991867	0.0913632	0.0494177	0.930958	0.680481	-0.0145912
DUTERTRE_ESTRADIOL_RESPONSE_24HR_UP	0.0394109	0.248172	0.36965	0.0308472	0.0170633	0.969924	0.0314004	0.0331669	0.912136	0.896826	0.0994675
DUTERTRE_ESTRADIOL_RESPONSE_6HR_DN	0.0292076	0.0745314	0.118841	0.0307615	-0.0278641	0.837208	0.0353774	0.197799	0.024273	0.060817	0.0814889
DUTERTRE_ESTRADIOL_RESPONSE_6HR_UP	0.0597467	-0.0576617	0.126298	0.0559024	-0.0332407	0.950837	0.0583423	-0.0962335	0.322716	0.369463	-0.0623786
DUTTA_APOPTOSIS_VIA_NFKB	0.0949522	-0.158537	0.000181153	0.0896352	-0.158893	0.584619	0.0977189	-0.109008	0.173865	0.0013135	-0.142146
EBAUER_MYOGENIC_TARGETS_OF_PAX3_FOXO1_FUSION	0.0574186	0.0470832	0.303801	0.0559403	0.0320516	1	0.0556414	-0.00408543	0.888854	0.854987	0.0250164
EBAUER_TARGETS_OF_PAX3_FOXO1_FUSION_DN	0.0251059	-0.171153	0.14804	0.0299731	-0.0408871	0.998018	0.030303	-0.0268054	0.545426	0.53909	-0.0796153
EBAUER_TARGETS_OF_PAX3_FOXO1_FUSION_UP	0.0633892	-0.0391285	0.118068	0.0604414	-0.0467602	0.805255	0.06359	-0.00845126	0.970503	0.574148	-0.0314466
EGUCHI_CELL_CYCLE_RB1_TARGETS	0.0748654	0.285971	0.367877	0.0343389	0.0368482	0.96293	0.0475171	0.230702	0.788559	0.862756	0.184507
EHLERS_ANEUPLOIDY_UP	0.0833085	-0.0626625	0.580418	0.0894622	0.0691234	0.948072	0.088478	0.00487123	0.783728	0.946499	0.00377737
EINAV_INTERFERON_SIGNATURE_IN_CANCER	0.0824061	0.213854	0.0546847	0.0764695	0.00757057	0.991867	0.0563516	-0.201456	0.446038	0.281781	0.00665627
ELLWOOD_MYC_TARGETS_DN	0.10453	0.0635251	0.157769	0.100992	-0.0609751	0.950047	0.100545	-0.0189756	0.663252	0.593795	-0.00547516
ELVIDGE_HIF1A_AND_HIF2A_TARGETS_DN	0.086238	-0.104508	0.0755501	0.0959563	-0.0339055	0.754816	0.100565	0.0631842	0.6443	0.358658	-0.0250765
ELVIDGE_HIF1A_AND_HIF2A_TARGETS_UP	0.0264898	-0.00437254	0.871452	0.0295453	0.148276	0.96293	0.0247119	-0.185718	0.234836	0.777077	-0.0139382
ELVIDGE_HIF1A_TARGETS_DN	0.074981	-0.0879922	0.158923	0.0768942	-0.181971	0.71555	0.086456	0.0481193	0.542101	0.472716	-0.0739481
ELVIDGE_HIF1A_TARGETS_UP	0.038132	0.056592	0.866466	0.0387121	0.0770559	0.842464	0.0334862	-0.140689	0.143023	0.606805	-0.00234713
ELVIDGE_HYPOXIA_BY_DMOG_DN	0.049801	0.0808863	0.233935	0.0468499	0.00840462	0.96293	0.045719	-0.0662031	0.542101	0.648878	0.00769594
ELVIDGE_HYPOXIA_BY_DMOG_UP	0.101307	-0.0782502	0.0465765	0.102342	-0.102145	0.805255	0.111908	0.0311936	0.867496	0.334866	-0.0497338
ELVIDGE_HYPOXIA_DN	0.0729894	-0.0141449	0.564268	0.0659705	-0.053276	0.864349	0.0700945	-0.0517541	0.305786	0.702945	-0.039725
ELVIDGE_HYPOXIA_UP	0.102883	-0.0770961	0.0566799	0.100516	-0.141589	0.733064	0.114696	0.0549395	0.855895	0.352156	-0.0545817
ENGELMANN_CANCER_PROGENITORS_DN	0.0558237	-0.0934483	0.0157792	0.0458832	-0.200323	0.523103	0.0567751	0.00909433	0.894814	0.132602	-0.0948924
ENGELMANN_CANCER_PROGENITORS_UP	0.0679417	-0.0562654	0.209298	0.0709359	0.0658417	0.996379	0.0740843	0.101456	0.324434	0.495268	0.0370107
ENK_UV_RESPONSE_EPIDERMIS_DN	0.0930124	-0.061732	0.0284931	0.0895636	-0.0653648	0.867375	0.0974183	-0.00233524	0.887184	0.265669	-0.043144
ENK_UV_RESPONSE_EPIDERMIS_UP	0.0897846	0.0528382	0.00877915	0.0861589	0.0170826	0.99343	0.0862855	0.0136922	0.739587	0.121025	0.027871
ENK_UV_RESPONSE_KERATINOCYTE_DN	0.109104	-0.0644108	0.00580191	0.103763	-0.0124215	0.92906	0.112421	-0.0430177	0.328002	0.0484836	-0.03995
ENK_UV_RESPONSE_KERATINOCYTE_UP	0.256677	-0.0126145	0.102148	0.246657	-0.0739929	0.60613	0.252409	-0.00642769	0.768891	0.413229	-0.0310117
EPPERT_CE_HSC_LSC	0.0374526	-0.0445011	0.942398	0.0324204	-0.0485289	0.948413	0.0472236	0.283452	0.015328	0.198566	0.063474
EPPERT_HSC_R	0.0767057	-0.0603336	0.230297	0.0741388	-0.038889	0.92401	0.0882297	0.0940896	0.238112	0.427138	-0.00171099
EPPERT_LSC_R	0.0571895	-0.156338	0.000527325	0.0513497	-0.163906	0.805255	0.0653788	0.0210616	0.541284	0.0102223	-0.0997275
EPPERT_PROGENITOR	0.0774692	0.0209226	0.794621	0.0690564	0.0169348	0.929464	0.0753946	-0.00388989	0.952833	0.994433	0.0113225
FAELT_B_CLL_WITH_VH_REARRANGEMENTS_DN	0.161923	0.0494813	0.112355	0.15922	0.055046	0.858628	0.160701	0.0119102	0.784393	0.52312	0.0388125
FAELT_B_CLL_WITH_VH_REARRANGEMENTS_UP	0.156787	-0.0237458	0.229732	0.162615	0.034981	0.92906	0.154988	0.00186963	0.934449	0.780195	0.00436827
FAELT_B_CLL_WITH_VH3_21_DN	0.156705	0.0632206	0.00412415	0.157305	0.0145101	0.689164	0.149873	0.0424866	0.147306	0.016341	0.0400724
FAELT_B_CLL_WITH_VH3_21_UP	0.0822911	0.0215627	0.94312	0.0659226	-0.165354	0.785972	0.0847742	0.0837929	0.238112	0.748113	-0.0199994
FALVELLA_SMOKERS_WITH_LUNG_CANCER	0.123694	-0.125828	0.0032693	0.109293	-0.114373	0.853158	0.143652	0.0264295	0.979562	0.0664565	-0.0712573
FARDIN_HYPOXIA_11	0.129907	-0.103729	0.126292	0.143077	-0.0444044	0.932735	0.163173	0.0975692	0.483481	0.453979	-0.0168546
FARMER_BREAST_CANCER_APOCRINE_VS_BASAL	0.0717859	0.0531172	0.00743253	0.0670982	0.0115473	0.92401	0.0753802	0.116168	0.000161746	0.000120745	0.0602776
FARMER_BREAST_CANCER_APOCRINE_VS_LUMINAL	0.0774316	0.0542544	0.00335408	0.0793627	0.0560743	0.451646	0.0841272	0.125858	1.23658e-05	3.31731e-06	0.0787289
FARMER_BREAST_CANCER_BASAL_VS_LULMINAL	0.0747225	-0.0250429	0.0217521	0.0700909	-0.0765746	0.513941	0.0742649	-0.0258848	0.749245	0.144218	-0.0425008
FARMER_BREAST_CANCER_CLUSTER_1	0.00579367	-0.10142	0.718476	0.00305101	-1.3065	0.689164	0	#NAME?	0.318681	0.718149	#NAME?
FARMER_BREAST_CANCER_CLUSTER_2	0.0292094	0.687625	0.066485	0.0117577	-0.00412003	0.96293	0.0199511	0.15561	0.806876	0.431499	0.279705
FERNANDEZ_BOUND_BY_MYC	0.179713	-0.0242083	0.0135111	0.184284	0.000678371	0.972385	0.176325	-0.0237222	0.145648	0.0513689	-0.0157507
FERRANDO_T_ALL_WITH_MLL_ENL_FUSION_DN	0.211199	0.0147201	0.913272	0.193409	-0.0163499	0.991867	0.206536	0.0185601	0.903565	0.998847	0.00564345
FERRANDO_T_ALL_WITH_MLL_ENL_FUSION_UP	0.174464	-0.0310192	0.0338769	0.164369	-0.0833145	0.678276	0.185985	0.04533	0.138025	0.0739128	-0.0230013
FERREIRA_EWINGS_SARCOMA_UNSTABLE_VS_STABLE_DN	0.0646399	0.0390689	0.765307	0.0681061	0.00665894	0.997459	0.0633609	0.0228084	0.982041	0.996783	0.0228454
FERREIRA_EWINGS_SARCOMA_UNSTABLE_VS_STABLE_UP	0.0795132	0.232087	0.341324	0.0552889	0.00604051	0.990718	0.0627517	-0.02164	0.689336	0.81974	0.0721626
FEVR_CTNNB1_TARGETS_DN	0.14755	-0.00632018	0.388002	0.129479	-0.0055451	0.928654	0.143386	-0.0237325	0.88915	0.892594	-0.0118659
FEVR_CTNNB1_TARGETS_UP	0.0762447	0.00231069	0.87601	0.0803549	-0.0214216	0.853158	0.0771613	0.0293437	0.583977	0.948305	0.00341093
FIGUEROA_AML_METHYLATION_CLUSTER_1_DN	0.0338243	-0.0202422	0.956176	0.0343457	-0.0537379	0.925039	0.0352798	-0.00487772	0.927105	0.998877	-0.0262859
FIGUEROA_AML_METHYLATION_CLUSTER_1_UP	0.0429712	0.0679174	0.0835723	0.0403462	-0.0419887	0.961156	0.0405185	-0.0289479	0.354907	0.310332	-0.00100641
FIGUEROA_AML_METHYLATION_CLUSTER_2_UP	0.01958	0.0767409	0.600108	0.0166345	0.0127235	0.961421	0.0244405	0.186909	0.218427	0.657388	0.0921244
FIGUEROA_AML_METHYLATION_CLUSTER_3_DN	0.061159	-0.0812691	0.00537402	0.0584291	-0.114749	0.573548	0.0624761	-0.0598445	0.330277	0.0321946	-0.0852877
FIGUEROA_AML_METHYLATION_CLUSTER_3_UP	0.0490022	0.00255401	0.774787	0.0466973	-0.00909221	0.950047	0.0495764	0.00165614	0.951262	0.994212	-0.00162735
FIGUEROA_AML_METHYLATION_CLUSTER_4_UP	0.0489338	0.0389862	0.065732	0.0480509	0.0563516	0.972385	0.0509637	0.0673799	0.223733	0.204037	0.0542392
FIGUEROA_AML_METHYLATION_CLUSTER_5_DN	0.0241907	0.0468829	0.660217	0.0230402	-0.155389	0.969924	0.0232432	-0.0243976	0.732671	0.958588	-0.0443014
FIGUEROA_AML_METHYLATION_CLUSTER_6_DN	0.00976163	0.259316	0.497649	0.00982461	0.182114	0.94894	0.00875398	0.435946	0.459946	0.802061	0.292459
FIGUEROA_AML_METHYLATION_CLUSTER_6_UP	0.0516099	0.0327235	0.272711	0.0470696	-0.0338461	0.963657	0.051113	0.0539654	0.417505	0.620081	0.0176142
FIGUEROA_AML_METHYLATION_CLUSTER_7_UP	0.0441403	-0.00939416	0.96942	0.0411428	0.00788599	0.990178	0.0465575	0.0645215	0.579853	0.978254	0.0210044
FINAK_BREAST_CANCER_SDPP_SIGNATURE	0.0470419	0.0614665	0.00128334	0.0479158	0.0119644	0.802598	0.044849	0.00318593	0.979973	0.0319898	0.0255389
FIRESTEIN_CTNNB1_PATHWAY	0.0222415	0.0795053	0.320375	0.0261549	0.554629	0.334333	0.0253097	0.0139264	0.973949	0.606599	0.21602
FIRESTEIN_PROLIFERATION	0.0289325	0.0674793	0.0491179	0.0305774	0.172375	0.573548	0.0280767	-0.0114089	0.915322	0.292623	0.0761485
FISCHER_DIRECT_P53_TARGETS_META_ANALYSIS	0.0735717	-0.0245599	0.549237	0.0740315	-0.0985817	0.898194	0.0730453	0.00320419	0.758598	0.922821	-0.0399791
FISCHER_DREAM_TARGETS	0.103451	0.00907927	0.697674	0.0885595	0.0155887	0.969924	0.100378	0.0183662	0.662738	0.952302	0.0143447
FISCHER_G1_S_CELL_CYCLE	0.0420432	-0.135583	0.0161165	0.040546	0.0174142	0.982217	0.0423075	-0.0872222	0.154088	0.0612548	-0.0684636
FISCHER_G2_M_CELL_CYCLE	0.0693077	0.00143144	0.845352	0.0595292	-0.054848	0.887314	0.0682767	-0.00060206	0.893505	0.992065	-0.0180062
FLECHNER_BIOPSY_KIDNEY_TRANSPLANT_OK_VS_DONOR_DN	0.135965	-0.0132358	0.911105	0.126863	-0.0156654	0.875511	0.132568	-0.0149947	0.97343	0.997765	-0.014632
FLECHNER_BIOPSY_KIDNEY_TRANSPLANT_OK_VS_DONOR_UP	0.19939	-0.00710251	0.412663	0.198291	0.00202076	0.969924	0.198573	-0.00746794	0.78392	0.888231	-0.00418323
FLECHNER_BIOPSY_KIDNEY_TRANSPLANT_REJECTED_VS_OK_DN	0.129531	0.0136881	0.410439	0.131283	0.0236168	0.969924	0.130147	0.0158044	0.284327	0.628431	0.0177031
FLECHNER_BIOPSY_KIDNEY_TRANSPLANT_REJECTED_VS_OK_UP	0.08543	0.013965	0.566222	0.0813339	-0.033384	0.760337	0.0843527	0.0337889	0.156385	0.494067	0.00478996
FLECHNER_PBL_KIDNEY_TRANSPLANT_OK_VS_DONOR_DN	0.132651	0.0106836	0.625031	0.127456	0.00897547	0.936708	0.131333	-0.00227245	0.825658	0.962503	0.00579555
FLECHNER_PBL_KIDNEY_TRANSPLANT_OK_VS_DONOR_UP	0.2668	-0.00775953	0.157498	0.264543	-0.000297412	0.961421	0.264447	-0.0217966	0.136528	0.256388	-0.00995117
FLECHNER_PBL_KIDNEY_TRANSPLANT_REJECTED_VS_OK_DN	0.209986	-0.00793281	0.577954	0.202093	-0.0149455	0.975393	0.208901	-0.0177431	0.926851	0.971753	-0.0135405
FLECHNER_PBL_KIDNEY_TRANSPLANT_REJECTED_VS_OK_UP	0.158452	0.0549902	0.0198911	0.154762	0.048576	0.854652	0.155899	0.0393096	0.490718	0.143831	0.0476253
FLORIO_NEOCORTEX_BASAL_RADIAL_GLIA_DN	0.0534471	0.360974	0.0971226	0.0362497	-0.0994123	0.92292	0.0368075	-0.0653252	0.838665	0.521462	0.0654122
FLORIO_NEOCORTEX_BASAL_RADIAL_GLIA_UP	0.0169696	0.115456	0.0914574	0.0196795	0.143253	0.868792	0.0188789	0.13797	0.0441817	0.0794244	0.132226
FLOTHO_PEDIATRIC_ALL_THERAPY_RESPONSE_DN	0.0207767	-0.34751	0.00074011	0.0216921	-0.313788	0.489508	0.017337	-0.544386	0.00365482	0.000140527	-0.401895
FLOTHO_PEDIATRIC_ALL_THERAPY_RESPONSE_UP	0.496392	-0.0130876	0.0274056	0.491962	-0.000545993	0.969924	0.496322	-0.00405404	0.993826	0.296818	-0.00589589
FONTAINE_FOLLICULAR_THYROID_ADENOMA_DN	0.140012	-0.0476042	0.0381082	0.134757	-0.0518687	0.922776	0.147138	0.0227541	0.482481	0.227106	-0.0255729
FONTAINE_FOLLICULAR_THYROID_ADENOMA_UP	0.057475	0.0198399	0.978465	0.0505107	-0.150277	0.577327	0.0600916	0.0472775	0.316447	0.75148	-0.02772
FONTAINE_PAPILLARY_THYROID_CARCINOMA_DN	0.0133772	0.0699548	0.451755	0.0139989	-0.00591997	0.969924	0.0150235	0.127039	0.705633	0.885116	0.0636914
FONTAINE_PAPILLARY_THYROID_CARCINOMA_UP	0.147656	0.0356436	0.36707	0.149849	0.0203707	0.929865	0.146919	0.0536654	0.100878	0.345805	0.0365599
FONTAINE_THYROID_TUMOR_UNCERTAIN_MALIGNANCY_DN	0.0844066	0.0754035	0.230297	0.0860125	0.100328	0.942489	0.0905942	0.133898	0.0157065	0.0777959	0.10321
FONTAINE_THYROID_TUMOR_UNCERTAIN_MALIGNANCY_UP	0.050844	-0.0658205	0.133108	0.0498005	-0.175053	0.513941	0.0456471	-0.0993201	0.0807194	0.10886	-0.113398
FORTSCHEGGER_PHF8_TARGETS_DN	0.0834139	0.0242806	0.225333	0.0799165	-0.0314267	0.955179	0.0865698	0.0568	0.015328	0.07601	0.0165513
FORTSCHEGGER_PHF8_TARGETS_UP	0.0534989	0.00689321	0.947486	0.055895	0.10913	0.793322	0.0535422	0.0304399	0.804198	0.985355	0.048821
FOSTER_KDM1A_TARGETS_DN	0.0563804	0.144667	4.39313e-09	0.0549766	0.0643849	0.643123	0.056459	0.145883	0.00144429	1.51429e-09	0.118312
FOSTER_KDM1A_TARGETS_UP	0.0272767	0.0453003	0.956176	0.027296	-0.0714544	0.96293	0.0242729	-0.082381	0.09582	0.562444	-0.0361784
FOSTER_TOLERANT_MACROPHAGE_DN	0.0708216	-0.0902115	0.0332813	0.0688509	-0.0374698	0.794203	0.072457	-0.0375241	0.622819	0.222886	-0.0550685
FOSTER_TOLERANT_MACROPHAGE_UP	0.0663763	0.00365499	0.933083	0.0689968	0.00936285	0.997643	0.0640412	0.0177826	0.94278	0.999664	0.0102668
FOURNIER_ACINAR_DEVELOPMENT_LATE_2	0.16713	0.00697471	0.933083	0.148115	-0.03115	0.908558	0.168914	0.0355208	0.75735	0.989562	0.00378182
FOURNIER_ACINAR_DEVELOPMENT_LATE_DN	0.155158	-0.0303417	0.77566	0.139147	-0.0359616	0.908558	0.157301	0.00910221	0.961834	0.992658	-0.019067
FRASOR_RESPONSE_TO_ESTRADIOL_DN	0.0896795	-0.043392	0.686575	0.0987121	9.61028e-16	0.99343	0.100079	0.0851422	0.275816	0.764949	0.0139167
FRASOR_RESPONSE_TO_ESTRADIOL_UP	0.0795804	-0.126377	0.00902304	0.0786949	-0.0550337	0.962459	0.0768231	-0.162092	0.133883	0.0355614	-0.114501
FRASOR_RESPONSE_TO_SERM_OR_FULVESTRANT_DN	0.0794621	0.325379	0.106954	0.0493098	-0.105772	0.998014	0.0518155	-0.0799818	0.894407	0.583105	0.0465416
FRASOR_TAMOXIFEN_RESPONSE_UP	0.0729961	-0.0574648	0.0718555	0.0750554	0.0435191	0.9982	0.0820286	0.0926039	0.15513	0.173759	0.0262194
FRIDMAN_IMMORTALIZATION_DN	0.110271	0.101889	0.0789867	0.103366	0.0300091	0.776409	0.102813	0.0313452	0.915322	0.450598	0.0544146
FRIDMAN_SENESCENCE_UP	0.156799	0.00857219	0.745822	0.15424	-0.00429445	0.997099	0.152628	0.00118583	0.830575	0.986954	0.00182119
FUJII_YBX1_TARGETS_DN	0.0602441	0.0955433	0.36707	0.050599	0.0499738	0.853158	0.0560129	0.00197338	0.954998	0.877953	0.0491635
FUJII_YBX1_TARGETS_UP	0.0704075	0.082436	0.00438605	0.0638252	-0.0339702	0.954946	0.0747306	0.16511	0.000493641	0.000206245	0.071192
FULCHER_INFLAMMATORY_RESPONSE_LECTIN_VS_LPS_DN	0.0666599	-0.11304	0.0434429	0.0682422	-0.055783	0.775007	0.0694373	-0.03144	0.77653	0.295013	-0.0667545
FULCHER_INFLAMMATORY_RESPONSE_LECTIN_VS_LPS_UP	0.0982542	0.00527713	0.836566	0.103407	0.0594168	0.779593	0.0999425	0.0160396	0.677491	0.950133	0.0269112
FURUKAWA_DUSP6_TARGETS_PCI35_DN	0.0497583	0.252753	0.231063	0.0349132	-0.0343115	0.985168	0.0433656	0.123141	0.39429	0.566922	0.113861
FURUKAWA_DUSP6_TARGETS_PCI35_UP	0.0822608	0.0512752	0.318437	0.0847359	0.0304049	0.92401	0.0835674	0.0614092	0.287829	0.551853	0.0476964
GABRIELY_MIR21_TARGETS	0.0445728	-0.0600794	0.369525	0.0398406	0.0330985	0.92906	0.0522144	0.00139204	0.803778	0.859969	-0.00852961
GAJATE_RESPONSE_TO_TRABECTEDIN_UP	0.177542	-0.00976413	0.87937	0.175352	-0.0341097	0.974867	0.178527	0.0262356	0.696092	0.984348	-0.00587941
GAL_LEUKEMIC_STEM_CELL_DN	0.0523167	0.176589	0.067994	0.0392049	-0.0561455	0.980188	0.0440683	0.0432461	0.385065	0.291801	0.0545633
GAL_LEUKEMIC_STEM_CELL_UP	0.0338303	-0.159794	0.0138829	0.0305921	-0.14737	0.936372	0.0438143	0.106504	0.83937	0.17157	-0.0668866
GALE_APL_WITH_FLT3_MUTATED_UP	0.0555945	-0.0403334	0.148682	0.0512811	0.0467341	0.857802	0.0544204	0.0244516	0.847458	0.616061	0.0102841
GALINDO_IMMUNE_RESPONSE_TO_ENTEROTOXIN	0.203626	-0.150242	0.000154983	0.198514	-0.136324	0.511056	0.207548	-0.039158	0.730537	0.00337691	-0.108575
GALLUZZI_PERMEABILIZE_MITOCHONDRIA	0.131936	-0.0494574	0.0277342	0.117335	-0.213429	0.619305	0.128802	-0.0791044	0.0390832	0.0234934	-0.113997
GARCIA_TARGETS_OF_FLI1_AND_DAX1_DN	0.0709967	-0.0126791	0.239018	0.0670232	-0.0380922	0.999371	0.0671996	-0.0550172	0.11857	0.309154	-0.0352629
GARCIA_TARGETS_OF_FLI1_AND_DAX1_UP	0.0453833	-0.0309902	0.67976	0.0534528	0.0466078	0.972385	0.0473619	-0.00165352	0.894814	0.983633	0.00465471
GARGALOVIC_RESPONSE_TO_OXIDIZED_PHOSPHOLIPIDS_BLACK_UP	0.0471878	-0.0806334	0.61495	0.0416732	-0.0895157	0.730816	0.0483983	0.0259588	0.693103	0.886694	-0.0480634
GARGALOVIC_RESPONSE_TO_OXIDIZED_PHOSPHOLIPIDS_BLUE_DN	0.0162177	-0.190527	0.151332	0.0186916	-0.145286	0.982904	0.0202795	0.0944074	0.428074	0.480495	-0.0804686
GARGALOVIC_RESPONSE_TO_OXIDIZED_PHOSPHOLIPIDS_BLUE_UP	0.0810345	-0.141498	0.000887198	0.0749052	-0.201968	0.594192	0.0825	-0.0563226	0.377462	0.00912087	-0.133263
GARGALOVIC_RESPONSE_TO_OXIDIZED_PHOSPHOLIPIDS_GREEN_DN	0.0457379	-0.117729	0.364239	0.0336934	-0.236957	0.92401	0.0503196	-0.0263901	0.616341	0.790329	-0.127026
GARGALOVIC_RESPONSE_TO_OXIDIZED_PHOSPHOLIPIDS_GREEN_UP	0.0325382	-0.255721	0.00535063	0.0357934	-0.305597	0.702002	0.0460791	0.0922743	0.715454	0.0656727	-0.156348
GARGALOVIC_RESPONSE_TO_OXIDIZED_PHOSPHOLIPIDS_GREY_DN	0.0367116	-0.0776858	0.434565	0.0439835	0.0540616	0.969924	0.0342417	-0.124939	0.349172	0.699362	-0.0495213
GARGALOVIC_RESPONSE_TO_OXIDIZED_PHOSPHOLIPIDS_MAGENTA_UP	0.167374	-0.0996768	0.0157898	0.158247	-0.118381	0.730816	0.168082	-0.0611629	0.433411	0.101691	-0.0930736
GARGALOVIC_RESPONSE_TO_OXIDIZED_PHOSPHOLIPIDS_PINK_DN	0.0216742	-0.161681	0.364239	0.0101887	-1.19592	0.334333	0.0226699	-0.0506769	0.902984	0.620673	-0.469426
GARGALOVIC_RESPONSE_TO_OXIDIZED_PHOSPHOLIPIDS_RED_DN	0.0286541	-0.0389132	0.69168	0.0303263	-0.038889	0.969924	0.0312754	0.00347889	0.883921	0.983844	-0.0247744
GARGALOVIC_RESPONSE_TO_OXIDIZED_PHOSPHOLIPIDS_TURQUOISE_DN	0.0287373	0.0727442	0.577412	0.0175096	-0.487813	0.406939	0.0233368	-0.168771	0.585961	0.681333	-0.194613
GARGALOVIC_RESPONSE_TO_OXIDIZED_PHOSPHOLIPIDS_TURQUOISE_UP	0.0919381	-0.124024	0.0121006	0.0850874	-0.136787	0.608484	0.093689	-0.0738182	0.268017	0.052536	-0.111543
GARGALOVIC_RESPONSE_TO_OXIDIZED_PHOSPHOLIPIDS_YELLOW_DN	0.00242466	-1.63408	0.0460057	0.000314891	-5.08746	0.744959	0	NA	0.0130095	0.0171569	NA
GARGALOVIC_RESPONSE_TO_OXIDIZED_PHOSPHOLIPIDS_YELLOW_UP	0.0274053	-0.315698	0.0203164	0.0309598	-0.0246072	0.928654	0.0276716	-0.31927	0.047978	0.0294722	-0.219858
GARY_CD5_TARGETS_DN	0.125237	-0.0290393	0.280124	0.115555	0.0183454	0.969924	0.12363	-0.0317547	0.35556	0.586219	-0.0141495
GARY_CD5_TARGETS_UP	0.101973	-0.0725424	0.00489324	0.0982118	-0.112316	0.577327	0.111057	0.0373549	0.723349	0.053887	-0.0491679
GAURNIER_PSMD4_TARGETS	0.0515234	0.0886889	0.782597	0.0472028	-0.0776305	0.826428	0.0473284	0.0367118	0.99895	0.989952	0.0159234
GAUSSMANN_MLL_AF4_FUSION_TARGETS_A_DN	0.023242	-0.0310961	0.18656	0.0220546	-0.303304	0.577327	0.0216704	-0.183168	0.547377	0.462106	-0.172523
GAUSSMANN_MLL_AF4_FUSION_TARGETS_A_UP	0.0504455	0.00429001	0.983642	0.0467165	-0.0871801	0.991867	0.0505486	0.00355755	0.976629	0.999982	-0.0264442
GAUSSMANN_MLL_AF4_FUSION_TARGETS_B_UP	0.0340556	-0.137009	0.0138271	0.0380523	0.0642632	0.939632	0.0357005	-0.0318443	0.361008	0.0972736	-0.0348632
GAUSSMANN_MLL_AF4_FUSION_TARGETS_C_UP	0.0953715	-0.0044721	0.929861	0.0963049	0.0911243	0.990599	0.102959	0.0490931	0.143841	0.670935	0.0452484
GAUSSMANN_MLL_AF4_FUSION_TARGETS_D_UP	0.0406674	0.169058	0.00602808	0.0477928	0.259367	0.643123	0.0303485	-0.127896	0.356783	0.0404631	0.100176
GAUSSMANN_MLL_AF4_FUSION_TARGETS_E_UP	0.0586844	0.00315797	0.931742	0.0637914	0.0646053	0.962255	0.0594287	0.0147603	0.399944	0.914929	0.0275079
GAUSSMANN_MLL_AF4_FUSION_TARGETS_F_DN	0.00764861	1.02051	0.105962	0.0203797	0.809708	0.489508	0.00526517	0.723377	0.365316	0.243124	0.851198
GAUSSMANN_MLL_AF4_FUSION_TARGETS_F_UP	0.051276	-0.0019393	0.983572	0.05522	0.0038275	0.969924	0.0525781	0.0266252	0.728031	0.993843	0.00950445
GAUSSMANN_MLL_AF4_FUSION_TARGETS_G_DN	0.0347459	-0.137897	0.095155	0.0317587	-0.196847	0.864725	0.0379298	-0.0945949	0.582854	0.414861	-0.143113
GAUSSMANN_MLL_AF4_FUSION_TARGETS_G_UP	0.0258669	-0.0505465	0.651471	0.0314589	0.125103	0.609919	0.0286405	0.0390604	0.876085	0.909262	0.0378723
GAVIN_FOXP3_TARGETS_CLUSTER_P2	0.0412454	0.087501	0.0123849	0.0515917	0.185513	0.406939	0.0388793	0.0171102	0.690995	0.0789765	0.0967079
GAVIN_FOXP3_TARGETS_CLUSTER_P3	0.0699242	0.0385301	0.520651	0.0685832	0.0141226	0.991867	0.0687814	0.00617285	0.824444	0.944519	0.0196085
GAVIN_FOXP3_TARGETS_CLUSTER_P4	0.0334318	-0.0155781	0.854644	0.03499	-0.101832	0.779593	0.0366031	0.0895687	0.36039	0.827028	-0.00928033
GAVIN_FOXP3_TARGETS_CLUSTER_P6	0.0761967	0.248289	0.0978169	0.0536909	-0.0595953	0.950047	0.0600638	0.020506	0.750158	0.502639	0.0697333
GAVIN_FOXP3_TARGETS_CLUSTER_P7	0.0732211	-0.0257231	0.48657	0.0637588	-0.159966	0.492361	0.0787599	0.00680448	0.939532	0.811029	-0.0596281
GAVIN_FOXP3_TARGETS_CLUSTER_T4	0.144204	0.0204123	0.651756	0.131946	-0.0374349	0.815225	0.150282	0.0592043	0.0112618	0.115003	0.0140606
GAVIN_FOXP3_TARGETS_CLUSTER_T7	0.276002	-0.00388424	0.36707	0.266721	-0.00525961	0.950047	0.278486	0.00445757	0.841066	0.873683	-0.00156209
GAVIN_PDE3B_TARGETS	0.023859	0.311497	0.351551	0.0249802	0.0162802	0.985848	0.0315592	0.328728	0.172791	0.465808	0.218835
GAZDA_DIAMOND_BLACKFAN_ANEMIA_ERYTHROID_DN	0.077649	-0.012733	0.351948	0.0767218	0.00328365	0.901015	0.0785097	-0.00154455	0.860965	0.857526	-0.00366465
GAZDA_DIAMOND_BLACKFAN_ANEMIA_ERYTHROID_UP	0.0322981	-0.0748942	0.318169	0.0319512	0.0359854	0.908558	0.031591	-0.0660892	0.646554	0.763237	-0.0349993
GAZDA_DIAMOND_BLACKFAN_ANEMIA_MYELOID_DN	0.178843	-0.027856	0.187242	0.18687	0.0158521	0.97759	0.173292	-0.0286507	0.282193	0.431489	-0.0135515
GAZDA_DIAMOND_BLACKFAN_ANEMIA_MYELOID_UP	0.0427579	0.0400059	0.854833	0.0376404	-0.00840708	0.980188	0.0370267	-0.146579	0.0465503	0.37078	-0.0383269
GAZDA_DIAMOND_BLACKFAN_ANEMIA_PROGENITOR_DN	0.123188	0.0720833	0.033635	0.111581	0.0945789	0.703367	0.111009	-0.00868784	0.948666	0.269419	0.0526581
GAZDA_DIAMOND_BLACKFAN_ANEMIA_PROGENITOR_UP	0.114163	-0.014441	0.362368	0.108463	-0.0619961	0.853158	0.113542	-0.00707827	0.812029	0.837801	-0.0278384
GAZIN_EPIGENETIC_SILENCING_BY_KRAS	0.0262333	0.0302386	0.957409	0.0222431	0.0893356	0.965548	0.0250627	-0.114893	0.440312	0.937331	0.0015604
GEISS_RESPONSE_TO_DSRNA_UP	0.185297	-0.134623	0.00260043	0.158833	-0.296034	0.641931	0.181927	-0.0973161	0.427424	0.0246104	-0.175991
GENTILE_RESPONSE_CLUSTER_D3	0.0577209	-0.193492	0.00116435	0.0507421	-0.295929	0.770694	0.0567147	-0.178692	0.117955	0.00550903	-0.222704
GENTILE_UV_HIGH_DOSE_DN	0.0962794	-0.0826431	0.00288842	0.0964624	0.0297765	0.92906	0.100324	-0.0255761	0.497193	0.0393965	-0.0261476
GENTILE_UV_LOW_DOSE_DN	0.058086	-0.0972544	0.132881	0.0553724	0.0486348	0.942489	0.0675867	0.0560999	0.847458	0.611195	0.00249343
GENTILE_UV_LOW_DOSE_UP	0.111603	-0.042599	0.491384	0.091913	-0.153516	0.826428	0.112537	0.0708529	0.81084	0.89822	-0.0417539
GENTILE_UV_RESPONSE_CLUSTER_D2	0.0834055	-0.178742	0.0103245	0.0766299	-0.0163834	0.950047	0.0980012	-0.0100777	0.748911	0.132119	-0.0684011
GENTILE_UV_RESPONSE_CLUSTER_D4	0.0748997	-0.121271	0.0239058	0.0717016	-0.0811227	0.86275	0.0829203	0.00967546	0.806876	0.224393	-0.0642393
GENTILE_UV_RESPONSE_CLUSTER_D5	0.081156	-0.0961977	0.0444464	0.0762967	-0.11378	0.817799	0.093913	0.0356396	0.783412	0.310125	-0.0581127
GENTILE_UV_RESPONSE_CLUSTER_D6	0.0651049	-0.0793859	0.095155	0.0706598	0.186838	0.864865	0.0722864	0.0384852	0.969404	0.536522	0.0486458
GENTILE_UV_RESPONSE_CLUSTER_D7	0.0851874	-0.0822938	0.0477312	0.078298	-0.195984	0.643123	0.0824535	-0.128716	0.0305085	0.0302375	-0.135665
GENTILE_UV_RESPONSE_CLUSTER_D8	0.0978721	-0.175961	0.000128556	0.0843581	-0.135179	0.942489	0.106394	-0.0492286	0.609308	0.00411725	-0.120123
GENTILE_UV_RESPONSE_CLUSTER_D9	0.135983	-0.0754153	0.410379	0.134529	0.00200434	0.995349	0.143787	0.0454151	0.433807	0.749153	-0.00933193
GENTLES_LEUKEMIC_STEM_CELL_UP	0	NA	0.312347	0	NA	0.656098	0	NA	0.742655	0.708413	NA
GEORGES_CELL_CYCLE_MIR192_TARGETS	0.0852272	-0.089599	0.166673	0.0762648	-0.0482612	0.920584	0.0888738	-0.0186295	0.585848	0.567316	-0.0521632
GEORGES_TARGETS_OF_MIR192_AND_MIR215	0.0571958	0.0246667	0.231044	0.0526562	0.00643446	0.969924	0.0590264	0.0306241	0.259461	0.458836	0.0205751
GERHOLD_ADIPOGENESIS_DN	0.304569	-0.0190767	0.141428	0.300252	0.00436349	0.982904	0.310542	0.0120354	0.170188	0.278052	-0.000892623
GERHOLD_ADIPOGENESIS_UP	0.158924	-0.0549123	0.0398957	0.163723	-0.00280745	0.928654	0.164042	0.0142271	0.968188	0.353867	-0.0144976
GERY_CEBP_TARGETS	0.0984444	-0.0689495	0.308004	0.0971351	-0.112501	0.900572	0.0985745	-0.00170048	0.968205	0.853719	-0.0610505
GESERICK_TERT_TARGETS_DN	0.277486	-0.142956	0.00226109	0.277289	-0.104315	0.781501	0.275557	-0.0615984	0.471096	0.027665	-0.102956
GHANDHI_BYSTANDER_IRRADIATION_UP	0.0373574	-0.0535665	0.69168	0.0383357	-0.0986263	0.950047	0.0424871	0.163808	0.736016	0.962571	0.00387178
GHANDHI_DIRECT_IRRADIATION_DN	0.0189418	-0.308461	0.00603918	0.0228783	-0.279249	0.406939	0.0168114	-0.330645	0.0769902	0.00876379	-0.306118
GHANDHI_DIRECT_IRRADIATION_UP	0.043072	0.0843266	0.243442	0.0384936	-0.0951572	0.991867	0.0468089	0.176811	0.138026	0.339478	0.0553267
GILDEA_METASTASIS	0.150608	0.0375272	0.18277	0.14248	-0.0342908	0.969924	0.145652	-0.00663625	0.957015	0.737573	-0.00113327
GINESTIER_BREAST_CANCER_20Q13_AMPLIFICATION_DN	0.0730175	-0.074457	0.0173788	0.0669399	-0.0438964	0.968452	0.0732018	-0.080912	0.00995096	0.00795415	-0.0664218
GINESTIER_BREAST_CANCER_20Q13_AMPLIFICATION_UP	0.0876513	-0.0276949	0.194297	0.0894373	-0.0166505	0.990599	0.0855386	-0.0455588	0.0901575	0.230296	-0.0299681
GINESTIER_BREAST_CANCER_ZNF217_AMPLIFIED_DN	0.0530446	-0.050801	0.00862586	0.0513045	-0.00788242	0.689164	0.0527891	-0.0601474	0.0985601	0.0211726	-0.0396103
GINESTIER_BREAST_CANCER_ZNF217_AMPLIFIED_UP	0.0463666	-0.146052	0.0121006	0.0482088	-0.0228776	0.955667	0.0524495	-0.05886	0.262969	0.0717368	-0.07593
GNATENKO_PLATELET_SIGNATURE	0.473527	-0.00457372	0.656602	0.484399	0.0109498	0.986041	0.464287	-0.0164777	0.580629	0.923633	-0.00336721
GOBERT_CORE_OLIGODENDROCYTE_DIFFERENTIATION	0.0111449	-0.179687	0.686575	0.0131712	-0.158357	0.991867	0.0163436	0.263914	0.552772	0.923878	-0.0247096
GOBERT_OLIGODENDROCYTE_DIFFERENTIATION_DN	0.0627866	-0.0800368	0.0492054	0.0648562	-0.0251446	0.991867	0.069763	0.0283053	0.898772	0.395423	-0.0256254
GOBERT_OLIGODENDROCYTE_DIFFERENTIATION_UP	0.0663764	0.230705	0.733764	0.0434561	-0.115628	0.916006	0.0509167	-0.0234934	0.741186	0.966246	0.030528
GOLDRATH_ANTIGEN_RESPONSE	0.153687	0.0642391	0.0156442	0.137687	-0.0416977	0.935818	0.148136	0.0280876	0.234836	0.0782618	0.0168763
GOLDRATH_HOMEOSTATIC_PROLIFERATION	0.156616	-0.014189	0.80287	0.15144	0.0288136	0.950047	0.16126	0.0198866	0.881409	0.992231	0.0115038
GOLDRATH_IMMUNE_MEMORY	0.0306417	0.139395	0.126938	0.0296043	-0.182553	0.594192	0.0345347	0.254671	0.00349613	0.0113905	0.0705043
GOTTWEIN_TARGETS_OF_KSHV_MIR_K12_11	0.0755149	-0.00634051	0.362745	0.0719409	0.0153622	0.98692	0.0739245	0.0028353	0.838027	0.878635	0.00395234
GOTZMANN_EPITHELIAL_TO_MESENCHYMAL_TRANSITION_DN	0.182696	-0.00518377	0.61317	0.175758	-0.0241267	0.92292	0.18845	0.048292	0.0525652	0.318077	0.00632718
GOTZMANN_EPITHELIAL_TO_MESENCHYMAL_TRANSITION_UP	0.143494	0.00941982	0.580994	0.133017	-0.0018806	0.947863	0.142223	-0.00310257	0.992256	0.976454	0.00147889
GOZGIT_ESR1_TARGETS_DN	0.0540723	-0.0842262	0.258328	0.0600983	-0.024116	0.92292	0.0575813	-0.00189002	0.978923	0.820046	-0.0367441
GOZGIT_ESR1_TARGETS_UP	0.0507075	0.0649715	0.166759	0.0519452	0.110154	0.853158	0.0556097	0.102869	0.017044	0.0609955	0.0926648
GRABARCZYK_BCL11B_TARGETS_DN	0.0510151	0.0437637	0.367515	0.0482065	-0.0496083	0.92906	0.0523967	0.0446174	0.84838	0.870922	0.0129243
GRABARCZYK_BCL11B_TARGETS_UP	0.0942	0.0362434	0.0103543	0.0946254	0.0946369	0.486696	0.0950245	0.0436294	0.045729	0.0102433	0.0581699
GRADE_COLON_AND_RECTAL_CANCER_DN	0.0182032	-0.0366186	0.797473	0.0224655	0.0869621	0.969924	0.0187414	-0.0882043	0.966114	0.996683	-0.0126203
GRADE_COLON_AND_RECTAL_CANCER_UP	0.192328	0.0157089	0.687208	0.177364	0.00470678	0.969924	0.185162	-0.0168704	0.74876	0.966465	0.00118175
GRADE_COLON_VS_RECTAL_CANCER_DN	0.0811617	-0.106335	0.000485217	0.0842586	-0.119981	0.718187	0.0822178	-0.0913319	0.187795	0.00373312	-0.105883
GRADE_COLON_VS_RECTAL_CANCER_UP	0.0654629	0.0188353	0.604797	0.0583632	-0.0606628	0.884332	0.0708542	0.0906951	0.338076	0.75451	0.0162892
GRAESSMANN_APOPTOSIS_BY_DOXORUBICIN_DN	0.161681	-0.0308377	0.0476392	0.15781	0.0202045	0.916873	0.167203	-0.0154682	0.640551	0.306963	-0.00870047
GRAESSMANN_APOPTOSIS_BY_DOXORUBICIN_UP	0.0855093	0.0168949	0.750134	0.0831595	-0.0525695	0.569709	0.0844726	0.0220189	0.241383	0.60361	-0.00455192
GRAESSMANN_APOPTOSIS_BY_SERUM_DEPRIVATION_DN	0.0543419	-0.00158307	0.876287	0.0569943	-0.00383518	0.972385	0.0568596	0.0127723	0.831319	0.994712	0.00245135
GRAESSMANN_APOPTOSIS_BY_SERUM_DEPRIVATION_UP	0.0798871	-0.0253017	0.349287	0.0807006	-0.020569	0.954779	0.075754	-0.0669079	0.0735456	0.284084	-0.0375929
GRAESSMANN_RESPONSE_TO_MC_AND_DOXORUBICIN_DN	0.0895905	-0.0181511	0.165938	0.0892441	0.0204562	0.928654	0.0895672	-0.0445109	0.156368	0.281109	-0.0140686
GRAESSMANN_RESPONSE_TO_MC_AND_DOXORUBICIN_UP	0.0504236	0.0340621	0.0846858	0.0495891	-0.0470672	0.681759	0.0524168	0.106215	0.00350976	0.0092532	0.0310699
GRAESSMANN_RESPONSE_TO_MC_AND_SERUM_DEPRIVATION_DN	0.0760222	0.125925	0.00103242	0.0754096	0.170358	0.406939	0.0814015	0.168406	0.00315072	0.000140492	0.154897
GRAESSMANN_RESPONSE_TO_MC_AND_SERUM_DEPRIVATION_UP	0.0585279	0.00348789	0.958096	0.0555417	-0.0981213	0.877443	0.0498736	-0.172338	0.113192	0.582239	-0.0889906
GRAHAM_CML_DIVIDING_VS_NORMAL_QUIESCENT_DN	0.0940421	-0.110332	0.258903	0.0931207	-0.0564663	0.972385	0.0994588	-0.0773672	0.791638	0.780005	-0.0813886
GRAHAM_CML_DIVIDING_VS_NORMAL_QUIESCENT_UP	0.0992784	0.291198	0.416414	0.0652702	-0.00295248	0.969924	0.0706989	-0.0344685	0.99895	0.935875	0.0845924
GRAHAM_CML_QUIESCENT_VS_NORMAL_DIVIDING_UP	0.0803909	-0.374644	2.42295e-06	0.0849662	-0.185262	0.85348	0.0843113	-0.168857	0.0250063	8.19737e-06	-0.242921
GRAHAM_CML_QUIESCENT_VS_NORMAL_QUIESCENT_DN	0.105897	-0.0578563	0.500079	0.106933	-0.0873423	0.793345	0.1036	-0.0991541	0.363158	0.693614	-0.0814509
GRAHAM_CML_QUIESCENT_VS_NORMAL_QUIESCENT_UP	0.0795008	0.0688236	0.741668	0.0645883	-0.0681039	0.901015	0.068927	-0.018049	0.733636	0.964279	-0.00577643
GRAHAM_NORMAL_QUIESCENT_VS_NORMAL_DIVIDING_DN	0.0756624	0.431173	0.19105	0.0415389	0.00885314	0.908744	0.0482003	0.00900593	0.586018	0.599936	0.149677
GRAHAM_NORMAL_QUIESCENT_VS_NORMAL_DIVIDING_UP	0.116591	-0.166884	0.00187038	0.117997	-0.0114464	0.881921	0.121873	-0.0980297	0.452868	0.0254847	-0.0921202
GREENBAUM_E2A_TARGETS_UP	0.107232	0.0674517	0.393852	0.0844336	-0.0532059	0.919553	0.105853	0.0704352	0.618099	0.809661	0.028227
GREGORY_SYNTHETIC_LETHAL_WITH_IMATINIB	0.105658	-0.0220001	0.700886	0.107517	0.0313387	0.950047	0.110966	0.0103484	0.992127	0.99127	0.00656233
GRESHOCK_CANCER_COPY_NUMBER_UP	0.0887763	-0.0387408	0.0479708	0.0830633	-0.0292723	0.969924	0.0943394	0.0137521	0.888854	0.382934	-0.018087
GROSS_ELK3_TARGETS_DN	0.13773	0.0504164	0.606396	0.141451	0.0211894	0.969924	0.151068	0.124928	0.235419	0.682862	0.0655112
GROSS_ELK3_TARGETS_UP	0.135823	0.0820704	0.0118872	0.14863	0.159056	0.870922	0.124363	-0.00633135	0.931991	0.158336	0.0782651
GROSS_HIF1A_TARGETS_DN	0.247947	0.0398467	0.910493	0.243467	-0.0320233	0.865019	0.25853	0.0259277	0.894814	0.994495	0.0112504
GROSS_HYPOXIA_VIA_ELK3_AND_HIF1A_DN	0.0814349	-0.00396479	0.939379	0.0707006	-0.025749	0.951832	0.0843873	0.0396302	0.64314	0.981247	0.00330545
GROSS_HYPOXIA_VIA_ELK3_AND_HIF1A_UP	0.167458	-0.101838	0.00777611	0.157697	-0.142189	0.760982	0.180549	0.00583851	0.609308	0.0809346	-0.0793961
GROSS_HYPOXIA_VIA_ELK3_DN	0.149984	-0.084907	0.112355	0.13798	-0.120463	0.853158	0.156962	0.00722758	0.945313	0.56941	-0.0660473
GROSS_HYPOXIA_VIA_ELK3_ONLY_DN	0.0859908	-0.0533037	0.206489	0.0724972	-0.101334	0.815433	0.0934634	0.0352015	0.541284	0.570922	-0.0398121
GROSS_HYPOXIA_VIA_ELK3_ONLY_UP	0.0914581	0.00480556	0.881672	0.0931091	0.0738943	0.928654	0.0955422	0.0336857	0.541284	0.950578	0.0374619
GROSS_HYPOXIA_VIA_ELK3_UP	0.102136	0.0235325	0.948313	0.0923871	0.00626756	0.991867	0.102793	0.0493462	0.693103	0.990499	0.0263821
GROSS_HYPOXIA_VIA_HIF1A_DN	0.124122	-0.0695752	0.0317448	0.117503	-0.17669	0.662327	0.127012	-0.00629405	0.731183	0.213551	-0.0841864
GROSS_HYPOXIA_VIA_HIF1A_UP	0.134983	-0.0361287	0.347946	0.124849	0.125702	0.908095	0.128653	-0.0884796	0.455945	0.693589	0.000364443
GRUETZMANN_PANCREATIC_CANCER_DN	0.130861	-0.026568	0.0112213	0.129778	-0.000362071	0.982217	0.133207	0.00995959	0.591124	0.121849	-0.00565682
GRUETZMANN_PANCREATIC_CANCER_UP	0.192717	0.0111053	0.322425	0.188762	0.00938125	0.969924	0.196011	0.031567	0.0653452	0.254592	0.0173512
GRYDER_PAX3FOXO1_ENHANCERS_IN_TADS	0.130535	-0.00911669	0.0440894	0.123832	-0.0373125	0.998014	0.130506	-0.00319124	0.368041	0.220617	-0.0165402
GRYDER_PAX3FOXO1_ENHANCERS_KO_DOWN	0.0868957	0.0107081	0.770057	0.0843638	-0.0229383	0.975393	0.0904078	0.0297477	0.625308	0.958732	0.00583916
GRYDER_PAX3FOXO1_TOP_ENHANCERS	0.111	0.00274113	0.942887	0.109913	0.0132065	0.908558	0.109958	-0.00834638	0.821715	0.994445	0.00253377
GU_PDEF_TARGETS_DN	0.123965	0.0871202	5.51901e-05	0.128576	0.115802	0.298397	0.129742	0.127161	6.83175e-05	2.63155e-07	0.110028
GU_PDEF_TARGETS_UP	0.0799784	0.0606552	0.590649	0.0752308	-0.0515391	0.991867	0.090466	0.153344	0.0142837	0.144127	0.0541533
GUENTHER_GROWTH_SPHERICAL_VS_ADHERENT_DN	0.164065	-0.0413978	0.326436	0.163638	-0.0302609	0.841878	0.171189	-0.0158773	0.881601	0.829215	-0.0291787
GUILLAUMOND_KLF10_TARGETS_DN	0.130971	0.0426382	0.216649	0.117767	0.0373495	0.92292	0.134924	0.029667	0.583464	0.636564	0.0365516
GUILLAUMOND_KLF10_TARGETS_UP	0.0501307	-0.133326	0.131792	0.0612844	-0.070653	0.969924	0.0586964	0.0641595	0.993819	0.659557	-0.0466063
GUO_HEX_TARGETS_DN	0.0656327	-0.0068628	0.871462	0.0732124	0.0742797	0.865019	0.0608132	-0.0900808	0.173865	0.667999	-0.00755462
GUO_HEX_TARGETS_UP	0.0764403	-0.0930286	0.064922	0.0750499	0.147931	0.781955	0.0946226	0.0680102	0.564725	0.311347	0.0409708
GUO_TARGETS_OF_IRS1_AND_IRS2	0.100821	-0.0633567	0.00887799	0.0957845	-0.0370869	0.760982	0.110893	0.0450681	0.313634	0.0553253	-0.0184585
GUTIERREZ_CHRONIC_LYMPHOCYTIC_LEUKEMIA_DN	0.0471918	-0.0487587	0.280055	0.04248	-0.138314	0.942089	0.0484909	0.108086	0.118678	0.327601	-0.0263287
GUTIERREZ_MULTIPLE_MYELOMA_UP	0.294527	0.0103074	0.549306	0.300322	0.0507382	0.887736	0.301387	0.0270337	0.441817	0.800001	0.0293597
GYORFFY_DOXORUBICIN_RESISTANCE	0.0727125	-0.00188028	0.865167	0.0639567	-0.0577714	0.875355	0.070679	0	0.83937	0.988922	-0.0198839
GYORFFY_MITOXANTRONE_RESISTANCE	0.0295618	-0.112913	0.0550359	0.0301844	0.0201698	0.998014	0.0284962	-0.158294	0.640773	0.350107	-0.0836789
HADDAD_B_LYMPHOCYTE_PROGENITOR	0.0596233	-0.090021	0.0169633	0.0592501	-0.0606399	0.908558	0.0646875	0.00123609	0.469368	0.130764	-0.0498083
HADDAD_T_LYMPHOCYTE_AND_NK_PROGENITOR_DN	0.0465146	-0.0345619	0.392695	0.0469841	0.0181335	1	0.0444683	-0.0136765	0.982519	0.92825	-0.010035
HADDAD_T_LYMPHOCYTE_AND_NK_PROGENITOR_UP	0.0722897	-0.0786011	0.0545197	0.0674546	-0.07125	0.826428	0.0770524	-0.0536168	0.732671	0.337643	-0.0678226
HAHTOLA_MYCOSIS_FUNGOIDES_CD4_DN	0.161127	-0.027217	0.511039	0.161654	0.0606113	0.70573	0.16663	-0.000317625	0.99895	0.915818	0.0110256
HAHTOLA_MYCOSIS_FUNGOIDES_CD4_UP	0.146682	-0.0457291	0.125395	0.118225	-0.319418	0.808624	0.144341	-0.0562324	0.343584	0.348102	-0.14046
HAHTOLA_MYCOSIS_FUNGOIDES_SKIN_DN	0.190334	-0.0125067	0.351551	0.185317	-0.051269	0.988839	0.202266	0.0666333	0.377462	0.668311	0.000952543
HAHTOLA_MYCOSIS_FUNGOIDES_SKIN_UP	0.173605	-0.0200541	0.0698735	0.168988	-0.00933224	0.942489	0.175896	-0.00370004	0.844245	0.44837	-0.0110288
HAHTOLA_SEZARY_SYNDROM_DN	0.0271959	0.18678	0.00692244	0.0248606	0.0572512	0.869687	0.0237888	-0.0204641	0.960523	0.112352	0.0745223
HAHTOLA_SEZARY_SYNDROM_UP	0.113448	-0.0576386	0.574428	0.101166	-0.0256727	0.950047	0.114406	-0.0182189	0.618099	0.903074	-0.0338434
HALMOS_CEBPA_TARGETS_DN	0.0517171	-0.0259278	0.977386	0.059307	0.121133	0.898194	0.0510693	0.0840697	0.745549	0.990732	0.0597583
HALMOS_CEBPA_TARGETS_UP	0.0356222	-0.177122	0.0433582	0.0427152	-0.126708	0.791716	0.0416521	0.0277303	0.892918	0.323617	-0.0920331
HAMAI_APOPTOSIS_VIA_TRAIL_DN	0.0513699	-0.0698548	0.00377973	0.0517848	-0.0485161	0.820448	0.0530493	0.0234103	0.917497	0.0684115	-0.0316535
HAMAI_APOPTOSIS_VIA_TRAIL_UP	0.107774	-0.0221112	0.450056	0.101584	0.0352293	0.715685	0.110264	0.00470142	0.887396	0.867939	0.00593983
HAN_JNK_SINGALING_DN	0.141392	-0.100218	0.0198911	0.177135	0.129257	0.918473	0.139164	-0.098889	0.0413097	0.0256836	-0.0232834
HAN_JNK_SINGALING_UP	0.106333	-0.0942386	0.0615662	0.100527	-0.0970987	0.853158	0.105736	-0.0718355	0.235672	0.186123	-0.0877242
HAN_SATB1_TARGETS_DN	0.0703804	-0.00603644	0.686575	0.0679815	-0.0627869	0.854652	0.0728972	0.0264669	0.595955	0.910142	-0.0141188
HAN_SATB1_TARGETS_UP	0.0646778	-0.0077288	0.742987	0.0676133	0.0160323	0.928507	0.0653676	0.0123881	0.697169	0.961852	0.0068972
HANN_RESISTANCE_TO_BCL2_INHIBITOR_DN	0.058727	0.132199	0.0222815	0.061981	0.0180339	0.981488	0.0539332	0.0547213	0.519945	0.176214	0.0683181
HANN_RESISTANCE_TO_BCL2_INHIBITOR_UP	0.0762694	-0.106735	0.111858	0.0897703	0.0174717	0.954779	0.0820459	-0.0105179	0.988832	0.609864	-0.0332604
HARRIS_BRAIN_CANCER_PROGENITORS	0.0796998	0.0259658	0.329832	0.0808729	0.071436	0.754256	0.0819366	0.063152	0.00185578	0.0176254	0.0535179
HARRIS_HYPOXIA	0.207466	-0.0682823	0.0450026	0.216067	-0.0171709	0.84289	0.216917	-0.0213409	0.965458	0.358001	-0.0355981
HASLINGER_B_CLL_WITH_13Q14_DELETION	0.0747098	-0.053445	0.474324	0.0706701	-0.14708	0.911653	0.0806292	0.0142314	0.897521	0.929275	-0.062098
HASLINGER_B_CLL_WITH_17P13_DELETION	0.195637	-0.042296	0.0592189	0.197995	-0.0344278	0.588968	0.191663	-0.0549166	0.0485407	0.0469663	-0.0438802
HATADA_METHYLATED_IN_LUNG_CANCER_DN	0.00492805	-0.484768	0.432832	0.0157603	-0.0355888	0.991867	0.00138552	-1.8893	0.688284	0.875313	-0.803218
HATADA_METHYLATED_IN_LUNG_CANCER_UP	0.0373342	-0.0494501	0.00882041	0.0379085	-0.0773802	0.586107	0.0391661	-0.0029972	0.877961	0.0950814	-0.0432758
HECKER_IFNB1_TARGETS	0.0508074	0.12365	0.102177	0.0502214	-0.0229449	0.942489	0.0445498	-0.00880884	0.739587	0.507951	0.0306321
HEIDENBLAD_AMPLICON_12P11_12_UP	0.0385321	0.218977	0.00962061	0.0560332	0.551709	0.147993	0.0370464	0.0940945	0.488237	0.0241271	0.28826
HEIDENBLAD_AMPLICON_8Q24_DN	0.109104	0.0305	0.600884	0.0989661	-0.0495152	0.8346	0.104218	-0.00114152	0.608433	0.882289	-0.00671891
HEIDENBLAD_AMPLICON_8Q24_UP	0.0241575	-0.125036	0.417279	0.025092	-0.189355	0.904361	0.0253902	-0.107722	0.925086	0.909813	-0.140704
HEIDENBLAD_AMPLIFIED_IN_PANCREATIC_CANCER	0.0274562	0.0217379	0.998943	0.0283312	0.093818	0.689164	0.0255244	-0.213561	0.161428	0.62351	-0.0326682
HELLEBREKERS_SILENCED_DURING_TUMOR_ANGIOGENESIS	0.124118	0.00515625	0.863743	0.130036	-0.0417085	0.969924	0.123444	0.0282081	0.774932	0.990247	-0.00278138
HELLER_HDAC_TARGETS_DN	0.102194	0.0224494	0.42007	0.0956363	0.00413796	0.983803	0.102531	0.0122913	0.562979	0.81927	0.0129596
HELLER_HDAC_TARGETS_SILENCED_BY_METHYLATION_DN	0.0955332	-0.0176095	0.760379	0.0951165	-0.0169775	0.92401	0.0991445	0.0082586	0.844245	0.983866	-0.00877614
HELLER_HDAC_TARGETS_SILENCED_BY_METHYLATION_UP	0.0912727	-0.0941535	0.0103383	0.091999	-0.0632415	0.619305	0.096287	0.00899472	0.99895	0.120331	-0.0494667
HELLER_HDAC_TARGETS_UP	0.0820047	-0.0237639	0.198676	0.0767498	-0.118238	0.73017	0.0830457	0.0167228	0.663252	0.585155	-0.0417597
HELLER_SILENCED_BY_METHYLATION_DN	0.0905345	-0.0272785	0.44834	0.0913885	-0.0148671	0.826428	0.0820228	-0.0859533	0.399289	0.700772	-0.0426996
HELLER_SILENCED_BY_METHYLATION_UP	0.0842703	0.036758	0.633289	0.0790191	-0.0421951	0.818115	0.0853135	0.0928609	0.0619093	0.332151	0.0291413
HENDRICKS_SMARCA4_TARGETS_DN	0.0923318	-0.0701559	0.297633	0.0755925	-0.26608	0.471483	0.0932032	0.00486393	0.925086	0.665409	-0.110457
HENDRICKS_SMARCA4_TARGETS_UP	0.198097	0.036343	0.263955	0.205417	0.0735712	0.757711	0.197118	0.0539584	0.141835	0.309438	0.0546242
HERNANDEZ_ABERRANT_MITOSIS_BY_DOCETACEL_2NM_DN	0.125264	0.0123837	0.797191	0.122808	0.0869081	0.92401	0.124162	0.00201379	0.354515	0.847169	0.0337685
HERNANDEZ_ABERRANT_MITOSIS_BY_DOCETACEL_2NM_UP	0.0397254	-0.0591569	0.163477	0.0438131	0.0378719	0.92401	0.0384997	-0.109566	0.395112	0.465007	-0.043617
HERNANDEZ_MITOTIC_ARREST_BY_DOCETAXEL_1_DN	0.143117	-0.0324293	0.461745	0.15554	0.022294	0.950047	0.14424	-0.0383949	0.532384	0.820209	-0.0161767
HERNANDEZ_MITOTIC_ARREST_BY_DOCETAXEL_1_UP	0.120422	0.0283062	0.854803	0.117071	-0.0201482	0.864349	0.104737	-0.0632478	0.825658	0.986045	-0.0183633
HERNANDEZ_MITOTIC_ARREST_BY_DOCETAXEL_2_UP	0.110696	-0.0319189	0.7034	0.106373	-0.0696392	0.92906	0.113172	0.074949	0.658619	0.946194	-0.0088697
HESS_TARGETS_OF_HOXA9_AND_MEIS1_DN	0.0869221	-0.0958544	0.0863911	0.0864452	-0.129275	0.8346	0.0884159	-0.0566899	0.918713	0.49009	-0.0939399
HESS_TARGETS_OF_HOXA9_AND_MEIS1_UP	0.127202	0.0500606	0.760357	0.111848	0.101147	0.868792	0.121095	0.0178243	0.864908	0.980674	0.056344
HILLION_HMGA1_TARGETS	0.272359	-0.0129902	0.260541	0.275683	0.0178549	0.972385	0.271876	-0.0085611	0.884665	0.809965	-0.00123214
HILLION_HMGA1B_TARGETS	0.3331	0.00842896	0.619111	0.331954	0.0146983	0.936708	0.33909	0.0431429	0.024273	0.202011	0.0220901
HINATA_NFKB_TARGETS_FIBROBLAST_UP	0.156293	-0.0874495	0.00156008	0.154888	-0.0834498	0.760982	0.156973	-0.0398494	0.834155	0.0315346	-0.0702496
HINATA_NFKB_TARGETS_KERATINOCYTE_UP	0.140945	-0.0437849	0.789362	0.140305	-0.0213655	0.959746	0.148329	0.0520002	0.149033	0.627758	-0.00438341
HIRSCH_CELLULAR_TRANSFORMATION_SIGNATURE_DN	0.105656	0.0146734	0.75042	0.0994815	0.0043813	0.969924	0.101799	-0.0325321	0.832964	0.98558	-0.00449248
HIRSCH_CELLULAR_TRANSFORMATION_SIGNATURE_UP	0.0858034	-0.0224082	0.605409	0.0810373	-0.145022	0.513941	0.0889098	0.00709273	0.982764	0.882749	-0.053446
HOEBEKE_LYMPHOID_STEM_CELL_DN	0.161056	-0.0364498	0.0590277	0.166069	-0.00485232	0.950047	0.161705	-0.00912819	0.228174	0.190113	-0.0168101
HOEBEKE_LYMPHOID_STEM_CELL_UP	0.0979545	-0.165561	0.00018588	0.0929474	-0.0334965	0.96288	0.107215	-0.0335918	0.417092	0.00415457	-0.0775498
HOEGERKORP_CD44_TARGETS_DIRECT_UP	0	NA	0.151679	0	NA	0.918473	0.00610078	0.41244	0.685339	0.583122	NA
HOELZEL_NF1_TARGETS_DN	0.0225426	-0.186889	0.263933	0.0324251	0.0478663	0.990599	0.0253959	0.00623939	0.898772	0.821725	-0.0442612
HOELZEL_NF1_TARGETS_UP	0.0678566	0.0122936	0.434164	0.0674022	0.0340393	0.944788	0.0719679	0.0242222	0.483712	0.778854	0.0235184
HOFFMANN_IMMATURE_TO_MATURE_B_LYMPHOCYTE_DN	0.0836565	-0.142999	2.42295e-06	0.085621	-0.0423605	0.908558	0.0861142	-0.0996307	0.00620836	2.50192e-06	-0.0949969
HOFFMANN_IMMATURE_TO_MATURE_B_LYMPHOCYTE_UP	0.0272691	0.0448185	0.562262	0.0205778	-0.258744	0.864725	0.0234835	0.0227022	0.853931	0.94055	-0.0637411
HOFFMANN_LARGE_TO_SMALL_PRE_BII_LYMPHOCYTE_DN	0.0551656	-0.0739547	0.0173788	0.0552943	-0.129545	0.669949	0.0558208	-0.0572114	0.463118	0.107096	-0.0869036
HOFFMANN_LARGE_TO_SMALL_PRE_BII_LYMPHOCYTE_UP	0.139538	0.190627	0.851963	0.108009	0.0533663	0.936708	0.112047	0.0104145	0.821715	0.990844	0.0848026
HOFFMANN_PRE_BI_TO_LARGE_PRE_BII_LYMPHOCYTE_DN	0.101615	-0.018889	0.363833	0.101799	-0.0275706	0.779593	0.108574	0.030537	0.554422	0.717232	-0.00530756
HOFFMANN_PRE_BI_TO_LARGE_PRE_BII_LYMPHOCYTE_UP	0.061968	0.00591333	0.638393	0.0664372	0.00580562	0.994264	0.0586462	0.110454	0.282193	0.75201	0.0407243
HOFFMANN_SMALL_PRE_BII_TO_IMMATURE_B_LYMPHOCYTE_DN	0.0451208	0.0741103	0.37567	0.0348888	-0.268116	0.695907	0.0409063	-0.0370621	0.978923	0.842394	-0.0770226
HOFFMANN_SMALL_PRE_BII_TO_IMMATURE_B_LYMPHOCYTE_UP	0.0727097	-0.0363343	0.461852	0.0759799	-0.00465779	0.955046	0.06841	-0.0250718	0.682636	0.879422	-0.0220213
HOFMANN_CELL_LYMPHOMA_DN	0.0555159	0.0230544	0.640118	0.0545922	-0.0217123	0.997643	0.0535901	-0.0536482	0.718611	0.955563	-0.0174354
HOFMANN_CELL_LYMPHOMA_UP	0.108148	0.078977	0.0647822	0.100724	0.0351765	0.810225	0.0957821	-0.0769858	0.205446	0.170261	0.0123893
HOFMANN_MYELODYSPLASTIC_SYNDROM_LOW_RISK_DN	0.264847	-0.0358964	0.307748	0.242172	-0.0527132	0.878542	0.269613	-0.0152977	0.70214	0.767327	-0.0346358
HOLLEMAN_ASPARAGINASE_RESISTANCE_ALL_DN	0.160929	-0.0702531	0.000553531	0.156741	-0.117038	0.305541	0.150874	-0.0749419	0.00315072	6.38239e-05	-0.0874109
HOLLEMAN_ASPARAGINASE_RESISTANCE_B_ALL_UP	0.55029	0.0436216	0.000616718	0.539325	0.0183322	0.841467	0.537924	0.0141315	0.356677	0.00861228	0.0253618
HOLLEMAN_VINCRISTINE_RESISTANCE_ALL_UP	0.0568664	0.0220113	0.477031	0.0533066	-0.0798319	0.996012	0.0570334	-0.00454393	0.732874	0.909318	-0.0207882
HOLLEMAN_VINCRISTINE_RESISTANCE_B_ALL_UP	0.0346701	0.00383639	0.936739	0.0316215	-0.0208519	0.939632	0.0363581	-0.102239	0.743713	0.990741	-0.0397516
HOLLERN_EMT_BREAST_TUMOR_DN	0.0309611	0.254226	5.34311e-07	0.036988	0.244896	0.513776	0.033467	0.287963	8.65385e-05	7.71333e-09	0.262362
HOLLERN_EMT_BREAST_TUMOR_UP	0.0757771	0.000737978	0.98472	0.0730091	0.032414	0.990711	0.0817117	0.0876461	0.119599	0.636595	0.040266
HOLLERN_MICROACINAR_BREAST_TUMOR_UP	0	NA	0.000246903	0.00156849	-2.12286	0.513941	0	NA	0.118043	0.00110563	NA
HOLLERN_SOLID_NODULAR_BREAST_TUMOR_DN	0.0987272	-0.0523134	0.0456011	0.107883	0.0447905	0.969924	0.0981793	-0.0502096	0.238112	0.167663	-0.0192442
HOLLERN_SQUAMOUS_BREAST_TUMOR	0.0304485	0.0232928	0.640298	0.0287231	-0.0303319	0.969924	0.0352651	0.23393	0.00350976	0.0564722	0.0756303
HOLLMANN_APOPTOSIS_VIA_CD40_DN	0.110502	0.0157336	0.151679	0.110624	-0.00698504	0.972385	0.108735	-0.0210282	0.356151	0.435307	-0.00409323
HOLLMANN_APOPTOSIS_VIA_CD40_UP	0.106879	0.0145791	0.469194	0.109522	0.0781635	0.523583	0.105368	0.00458007	0.779444	0.769583	0.0324409
HONMA_DOCETAXEL_RESISTANCE	0.426596	-0.00215645	0.765941	0.409106	-0.0399808	0.869235	0.40695	-0.0196094	0.4384	0.872604	-0.0205822
HOOI_ST7_TARGETS_DN	0.0571211	-0.00124624	0.824709	0.0614863	0.0223445	0.935834	0.059413	0.0416061	0.302214	0.819892	0.0209015
HOOI_ST7_TARGETS_UP	0.0560666	0.0635723	0.0110354	0.0558324	0.0149194	0.991867	0.0549399	0.0112989	0.550792	0.115592	0.0299302
HOQUE_METHYLATED_IN_CANCER	0.0391196	-0.157559	0.01034	0.0412259	-0.286295	0.334333	0.0361695	-0.116656	0.34268	0.0360615	-0.186836
HORIUCHI_WTAP_TARGETS_DN	0.131898	0.115545	0.397668	0.10921	0.00633158	0.972385	0.119727	0.0290076	0.583977	0.811844	0.0502947
HORIUCHI_WTAP_TARGETS_UP	0.0364623	-0.118825	0.0301275	0.0427508	-0.123227	0.748267	0.0356878	-0.134481	0.301977	0.125521	-0.125511
HORTON_SREBF_TARGETS	0.0486568	0.474931	0.0213579	0.0299393	0.486123	0.969924	0.0799538	1.09645	0.00390928	0.00443797	0.685834
HOSHIDA_LIVER_CANCER_LATE_RECURRENCE_DN	0.048239	0.0435214	0.513805	0.0497438	0.0126594	0.972385	0.0451709	0.00228061	0.975646	0.96356	0.0194872
HOSHIDA_LIVER_CANCER_LATE_RECURRENCE_UP	0.103663	-0.0403908	0.621838	0.0994712	-0.0503011	0.969924	0.107664	-0.0523089	0.498356	0.879041	-0.0476669
HOSHIDA_LIVER_CANCER_SUBCLASS_S1	0.141832	-0.00808445	0.39824	0.142444	-0.0448749	0.868792	0.142881	0.0166133	0.770805	0.852093	-0.0121153
HOSHIDA_LIVER_CANCER_SUBCLASS_S2	0.150435	-0.0697206	0.000598004	0.153923	0.0161991	0.969924	0.159595	-0.0128382	0.621323	0.0145441	-0.0221199
HOSHIDA_LIVER_CANCER_SUBCLASS_S3	0.0676497	0.00920294	0.86557	0.0738382	-0.00660681	0.887736	0.069328	0.0141064	0.726627	0.978551	0.00556752
HOSHIDA_LIVER_CANCER_SURVIVAL_DN	0.0822153	0.0443775	0.173459	0.0777106	-0.0134777	0.969924	0.0809871	-0.0153348	0.964146	0.725564	0.00518836
HOSHIDA_LIVER_CANCER_SURVIVAL_UP	0.107926	0.0907793	0.000940067	0.103806	0.0623605	0.968452	0.110724	0.0983408	0.059701	0.00320877	0.0838269
HOUSTIS_ROS	0.277903	-0.0429563	0.00277671	0.292205	0.0184524	0.969924	0.273023	-0.0616415	0.00369646	0.000784902	-0.0287151
HOWLIN_CITED1_TARGETS_1_DN	0.0481125	0.046447	0.883355	0.0495857	0.204643	0.917064	0.0483683	0.00366632	0.646193	0.971959	0.0849189
HOWLIN_CITED1_TARGETS_1_UP	0.0487926	-0.036196	0.328248	0.0441439	0.0498739	0.92906	0.0541479	0.054181	0.484213	0.700264	0.0226197
HOWLIN_PUBERTAL_MAMMARY_GLAND	0.054013	-0.120864	0.0098275	0.054642	-0.116468	0.748267	0.0557842	-0.0552766	0.484832	0.0802956	-0.0975363
HSIAO_HOUSEKEEPING_GENES	0.522446	-0.0130615	0.0321808	0.525771	-0.00709761	0.962459	0.519834	0.000293884	0.917497	0.309756	-0.00662174
HSIAO_LIVER_SPECIFIC_GENES	0.0257084	0.0885856	0.181465	0.0295483	0.10541	0.785972	0.0247201	0.00141904	0.988789	0.687827	0.0651382
HU_ANGIOGENESIS_DN	0.248212	-0.024354	0.208621	0.241902	-0.0666219	0.715685	0.242574	-0.0270103	0.68879	0.602793	-0.0393287
HU_GENOTOXIC_DAMAGE_24HR	0.219752	-0.0103007	0.522066	0.205361	-0.0816666	0.643123	0.209957	-0.0597654	0.469368	0.717804	-0.0505776
HU_GENOTOXIC_DAMAGE_4HR	0.0908168	0.00661964	0.88194	0.0823471	-0.0319961	0.969576	0.0847159	-0.042347	0.82704	0.994644	-0.0225745
HU_GENOTOXIN_ACTION_DIRECT_VS_INDIRECT_24HR	0.187102	-0.030759	0.314657	0.18342	0.0398436	0.901015	0.190663	0.0127538	0.593012	0.735157	0.00727944
HU_GENOTOXIN_ACTION_DIRECT_VS_INDIRECT_4HR	0.12532	-0.0938405	0.00120025	0.116446	-0.159863	0.450607	0.132688	-0.0141527	0.807121	0.0168781	-0.0892854
HUANG_DASATINIB_RESISTANCE_DN	0.0481656	0.0807337	0.00680523	0.0518299	0.0475024	0.92906	0.0514116	0.106843	0.0315411	0.00913657	0.0783597
HUANG_DASATINIB_SENSITIVITY_UP	0.0982393	0.11147	0.000987758	0.0899474	-0.00101654	0.969924	0.094476	0.0154345	0.812764	0.0263002	0.0419628
HUANG_FOXA2_TARGETS_DN	0.0982006	-0.0263394	0.96886	0.101193	0.0935347	0.96853	0.100348	0.102305	0.0103948	0.159469	0.0565001
HUANG_FOXA2_TARGETS_UP	0.0290495	-0.141162	0.164792	0.0370097	-0.0518799	0.868792	0.0301855	-0.0920182	0.834155	0.64287	-0.0950202
HUANG_GATA2_TARGETS_DN	0.0794977	-0.0478571	0.218052	0.0786747	-0.0900569	0.558437	0.0780276	-0.0146642	0.925086	0.62714	-0.0508594
HUANG_GATA2_TARGETS_UP	0.163737	-0.00454046	0.904501	0.160995	-0.0388376	0.901015	0.16311	0.00377165	0.463425	0.924469	-0.0132021
HUMMEL_BURKITTS_LYMPHOMA_UP	0.0794148	-0.148001	6.11764e-05	0.0809456	-0.156668	0.594192	0.0775266	-0.103964	0.0756023	0.00026323	-0.136211
HUMMERICH_SKIN_CANCER_PROGRESSION_DN	0.0936487	0.0143033	0.493597	0.0885014	-0.0390308	0.785384	0.0970949	0.0560955	0.0996566	0.368821	0.010456
HUMMERICH_SKIN_CANCER_PROGRESSION_UP	0.196574	-0.0188289	0.620309	0.192088	-0.0505226	0.918473	0.2059	0.0292911	0.173567	0.59239	-0.0133535
HUNSBERGER_EXERCISE_REGULATED_GENES	0.144251	-0.0944549	0.0326572	0.146278	-0.00228202	0.8346	0.154359	0.0185145	0.99895	0.30212	-0.0260741
HUPER_BREAST_BASAL_VS_LUMINAL_DN	0.182798	0.0059523	0.63975	0.193149	0.0171991	0.936914	0.178585	-0.0155241	0.528997	0.890435	0.00254244
HUPER_BREAST_BASAL_VS_LUMINAL_UP	0.0707412	0.0419759	0.606396	0.0607199	-0.0716465	0.92906	0.0854931	0.276738	2.20594e-06	0.000133043	0.0823556
HUTTMANN_B_CLL_POOR_SURVIVAL_DN	0.0352584	0.0226128	0.756954	0.0382511	0.146752	0.875045	0.0449368	0.137885	0.199778	0.670592	0.102417
HUTTMANN_B_CLL_POOR_SURVIVAL_UP	0.0788717	0.0224825	0.343756	0.0761491	-0.0365433	0.619305	0.0799596	0.0486637	0.059936	0.189771	0.0115343
HWANG_PROSTATE_CANCER_MARKERS	0.334036	-0.0569659	0.020901	0.322288	-0.0721119	0.760982	0.340888	-0.0126235	0.758564	0.183081	-0.0472338
ICHIBA_GRAFT_VERSUS_HOST_DISEASE_35D_DN	0.0292598	-0.162296	0.0120195	0.0283442	-0.245285	0.450607	0.0285382	-0.181818	0.176367	0.0306908	-0.196466
ICHIBA_GRAFT_VERSUS_HOST_DISEASE_35D_UP	0.104179	0.0433169	0.473027	0.0975623	-0.0554819	0.748267	0.0962872	-0.000934327	0.925086	0.897078	-0.00436644
ICHIBA_GRAFT_VERSUS_HOST_DISEASE_D7_DN	0.0383142	0.0096965	0.699681	0.0352435	-0.0153023	0.991867	0.0382408	0.0445995	0.691366	0.961542	0.0129979
ICHIBA_GRAFT_VERSUS_HOST_DISEASE_D7_UP	0.122282	0.0087053	0.854803	0.111845	-0.121844	0.715685	0.102201	-0.197575	0.059038	0.355232	-0.103571
IGARASHI_ATF4_TARGETS_DN	0.0560514	-0.0122048	0.446943	0.0541761	-0.0677364	0.916873	0.0516477	-0.0991589	0.491622	0.782801	-0.0597
IGLESIAS_E2F_TARGETS_UP	0.265636	-0.0084199	0.567291	0.262625	-0.00393891	0.972385	0.26532	-0.0111744	0.608433	0.902071	-0.0078444
IIZUKA_LIVER_CANCER_PROGRESSION_G1_G2_DN	0.173079	0.00893612	0.724575	0.156904	0.0805574	0.901015	0.18654	0.0574237	0.469703	0.883354	0.0489724
IIZUKA_LIVER_CANCER_PROGRESSION_G2_G3_UP	0.105012	0.0898458	0.940982	0.108261	0.0465489	0.951832	0.106412	0.00451057	0.872601	0.997923	0.0469684
IKEDA_MIR1_TARGETS_UP	0.180461	-0.0166982	0.329832	0.174812	0.0529178	0.935834	0.192009	0.0499986	0.808412	0.836349	0.0287394
IKEDA_MIR133_TARGETS_UP	0.133754	-0.0633601	0.0317144	0.123124	-0.0517635	0.92401	0.146264	-0.00187668	0.918348	0.300065	-0.0390001
IKEDA_MIR30_TARGETS_UP	0.0955121	-0.16015	0.0150896	0.0977125	0.0793408	0.976212	0.115683	0.0298436	0.992619	0.206923	-0.0169887
INGRAM_SHH_TARGETS_DN	0.0648082	-0.020484	0.870092	0.0740238	0.0583796	0.928654	0.0688087	0.0839822	0.374747	0.880639	0.0406259
INGRAM_SHH_TARGETS_UP	0.0605554	-0.114049	0.172219	0.0714899	-0.0194203	0.865019	0.0582062	-0.0673345	0.392457	0.460134	-0.0669344
IRITANI_MAD1_TARGETS_DN	0.281844	-0.00517689	0.711232	0.279552	0.0359304	0.967933	0.273324	-0.0361883	0.426601	0.873965	-0.00181161
ISHIDA_E2F_TARGETS	0.076219	0.304733	0.513385	0.0504267	0.281358	0.833503	0.0455697	-0.0420309	0.514006	0.805232	0.181353
ISSAEVA_MLL2_TARGETS	0.108626	0.135792	4.32618e-06	0.089148	-0.0498749	0.928654	0.109934	0.15947	1.2733e-05	1.56253e-08	0.0817956
IVANOVA_HEMATOPOIESIS_EARLY_PROGENITOR	0.0606586	0.0237676	0.10285	0.0604502	0.0264391	0.955179	0.0594907	-0.0123837	0.64894	0.480791	0.0126076
IVANOVA_HEMATOPOIESIS_INTERMEDIATE_PROGENITOR	0.0883747	0.0309243	0.673441	0.0870844	0.0530266	0.946308	0.0859168	-0.0357423	0.651345	0.940515	0.0160695
IVANOVA_HEMATOPOIESIS_LATE_PROGENITOR	0.0641435	0.0406387	0.0218371	0.0667064	0.067758	0.586107	0.0643779	0.0165174	0.44751	0.111619	0.0416381
IVANOVA_HEMATOPOIESIS_MATURE_CELL	0.0424586	0.0434301	0.604351	0.0429154	-0.0162379	0.950047	0.0435581	0.075407	0.498356	0.86818	0.0341997
IVANOVA_HEMATOPOIESIS_STEM_CELL	0.064969	-0.15106	0.00644492	0.0612894	-0.0988238	0.864349	0.073289	-0.0403744	0.844245	0.0974554	-0.0967528
IVANOVA_HEMATOPOIESIS_STEM_CELL_AND_PROGENITOR	0.0454705	-0.0633782	0.00741321	0.0514771	0.079323	0.911842	0.047319	-0.0286606	0.790602	0.106442	-0.00423858
IVANOVA_HEMATOPOIESIS_STEM_CELL_LONG_TERM	0.02893	-0.0141446	0.968137	0.0308079	0.0247252	0.972385	0.0289095	0.0468657	0.498356	0.958583	0.0191488
IVANOVSKA_MIR106B_TARGETS	0.0433235	-0.0570161	0.0725277	0.0387926	-0.0962845	0.634677	0.0440155	0.00500396	0.587947	0.30106	-0.0494322
IWANAGA_CARCINOGENESIS_BY_KRAS_DN	0.0633748	0.0233098	0.574394	0.0618971	-0.0499122	0.991867	0.0597182	-0.0593179	0.634664	0.916495	-0.0286401
IWANAGA_CARCINOGENESIS_BY_KRAS_PTEN_DN	0.0492171	-0.0312393	0.0719325	0.0486357	0.0393816	0.990281	0.0510167	-0.0271454	0.472044	0.341193	-0.0063344
IWANAGA_CARCINOGENESIS_BY_KRAS_PTEN_UP	0.0524759	-0.0435282	0.114024	0.0530216	-0.0330853	0.86141	0.0553065	0.0433455	0.980506	0.585402	-0.0110894
IWANAGA_CARCINOGENESIS_BY_KRAS_UP	0.0675301	0.0694992	0.0187997	0.0709925	0.11854	0.730816	0.0749113	0.0977687	0.0452172	0.0221436	0.0952694
IWANAGA_E2F1_TARGETS_INDUCED_BY_SERUM	0.0728658	-0.0344982	0.866825	0.0683314	0.159409	0.826428	0.0612778	-0.0591902	0.168269	0.645379	0.0219069
IZADPANAH_STEM_CELL_ADIPOSE_VS_BONE_DN	0.0343254	-0.0319626	0.601262	0.0392488	0.0786569	0.969924	0.0408117	0.0395493	0.527906	0.884202	0.0287479
IZADPANAH_STEM_CELL_ADIPOSE_VS_BONE_UP	0.117706	-0.0169307	0.470662	0.109122	-0.0798095	0.785972	0.119969	0.0143827	0.821715	0.881474	-0.0274525
JAATINEN_HEMATOPOIETIC_STEM_CELL_DN	0.0416645	0.036006	0.764781	0.0394748	-0.117942	0.929464	0.0381966	-0.00492836	0.884346	0.98818	-0.0289549
JAATINEN_HEMATOPOIETIC_STEM_CELL_UP	0.0585246	-0.0156227	0.748362	0.0607428	0.0469635	0.935834	0.0604729	0.00317187	0.98637	0.993591	0.0115042
JACKSON_DNMT1_TARGETS_UP	0.105969	-0.0320025	0.148984	0.0942221	-0.157409	0.472205	0.104127	-0.0232999	0.901098	0.479429	-0.0709038
JAEGER_METASTASIS_DN	0.0570663	0.109846	0.00970323	0.0598465	0.0763321	0.643123	0.0654373	0.237762	3.61509e-07	4.94296e-07	0.141313
JAEGER_METASTASIS_UP	0.103219	0.00243623	0.641919	0.0955746	-0.0520424	0.739992	0.0922107	-0.0852003	0.923848	0.949122	-0.0449355
JAERVINEN_AMPLIFIED_IN_LARYNGEAL_CANCER	0.0897908	0.0213649	0.796188	0.0921557	0.144148	0.805255	0.0928156	0.0367962	0.91273	0.982749	0.0674365
JAIN_NFKB_SIGNALING	0.0763032	-0.0327629	0.571829	0.0842145	0.107754	0.539052	0.0804351	0.0764521	0.186164	0.455747	0.0504811
JAZAERI_BREAST_CANCER_BRCA1_VS_BRCA2_DN	0.0528545	0.0817738	0.681593	0.0512463	0.140424	0.932119	0.0489234	-0.00499703	0.888643	0.97959	0.0724003
JAZAERI_BREAST_CANCER_BRCA1_VS_BRCA2_UP	0.103468	-0.0858314	0.00317551	0.109118	0.0224129	0.890038	0.115301	0.0683817	0.403235	0.0350347	0.0016544
JAZAG_TGFB1_SIGNALING_DN	0.0797055	-0.00670268	0.77566	0.0743774	-0.034876	0.972385	0.0743056	0.0310168	0.795741	0.984802	-0.00352063
JAZAG_TGFB1_SIGNALING_UP	0.0467849	0.00983831	0.993783	0.0503722	0.0772409	0.950047	0.044604	-0.027919	0.526277	0.965931	0.0197201
JAZAG_TGFB1_SIGNALING_VIA_SMAD4_DN	0.0446329	-0.0371023	0.606396	0.0508364	0.115696	0.868792	0.0433513	-0.0783033	0.536223	0.865303	9.67679e-05
JAZAG_TGFB1_SIGNALING_VIA_SMAD4_UP	0.0721698	-0.0282281	0.140582	0.075485	0.0011553	0.990178	0.0719925	-0.00917328	0.784393	0.61878	-0.012082
JECHLINGER_EPITHELIAL_TO_MESENCHYMAL_TRANSITION_DN	0.134952	-0.111111	0.170512	0.121235	-0.200245	0.781955	0.144007	0.00658898	0.925086	0.651582	-0.101589
JECHLINGER_EPITHELIAL_TO_MESENCHYMAL_TRANSITION_UP	0.124462	0.0255624	0.81038	0.121727	-0.00377039	0.977798	0.119936	0.0161434	0.981926	0.997815	0.0126451
JEON_SMAD6_TARGETS_UP	0.171696	0.022199	0.69667	0.162	-0.0429651	0.990281	0.16914	-0.0239897	0.901761	0.987464	-0.0149186
JEPSEN_SMRT_TARGETS	0.107028	-0.119358	0.106627	0.109962	-0.0633105	0.96293	0.109531	-0.0125616	0.917343	0.579544	-0.0650767
JI_METASTASIS_REPRESSED_BY_STK11	0.0509337	-0.116883	0.263199	0.0626476	0.0595888	0.969924	0.0616557	0.107029	0.674959	0.74171	0.0165781
JI_RESPONSE_TO_FSH_DN	0.173266	-0.035373	0.400523	0.16487	-0.00381039	0.954779	0.188138	0.0531994	0.348008	0.672132	0.00467199
JI_RESPONSE_TO_FSH_UP	0.118793	0.0376718	0.329832	0.107725	-0.058772	0.942068	0.120935	0.0861566	0.189954	0.462375	0.0216855
JIANG_AGING_CEREBRAL_CORTEX_DN	0.269308	-0.0119765	0.484813	0.25633	0.00120599	0.969924	0.270839	0.0157627	0.296786	0.684993	0.00166405
JIANG_AGING_CEREBRAL_CORTEX_UP	0.331418	-0.0623254	1.75499e-06	0.326604	-0.0137907	0.975695	0.33307	-0.02911	0.419496	8.27546e-05	-0.0350754
JIANG_AGING_HYPOTHALAMUS_DN	0.163	0.0416282	0.96942	0.151052	-0.0658969	0.936708	0.153939	-0.0311614	0.927105	0.999253	-0.0184767
JIANG_AGING_HYPOTHALAMUS_UP	0.358595	-0.00845683	0.567176	0.349695	-0.00622609	0.991867	0.343801	-0.0289402	0.410457	0.817397	-0.014541
JIANG_HYPOXIA_CANCER	0.122202	0.011326	0.711204	0.113321	-0.0715166	0.594192	0.123692	0.00275189	0.980506	0.94023	-0.0191463
JIANG_HYPOXIA_NORMAL	0.109787	-0.0629258	0.0147639	0.114236	-0.0186058	0.908558	0.119121	0.0250498	0.940726	0.188426	-0.0188273
JIANG_TIP30_TARGETS_UP	0.160359	0.0100823	0.877966	0.149576	-0.0727592	0.610795	0.163138	0.00134377	0.795943	0.94491	-0.0204444
JIANG_VHL_TARGETS	0.108976	-0.0163778	0.541469	0.114464	0.00319485	0.991867	0.110299	0.0114079	0.992256	0.97388	-0.000591666
JINESH_BLEBBISHIELD_TO_IMMUNE_CELL_FUSION_PBSHMS_DN	0.0723424	-0.0293082	0.52465	0.0786459	0.0238551	0.991867	0.0708804	-0.0388037	0.89848	0.958122	-0.0147523
JINESH_BLEBBISHIELD_TO_IMMUNE_CELL_FUSION_PBSHMS_UP	0.114993	0.0346943	0.583666	0.111784	0.017513	0.968452	0.113391	0.0100055	0.374444	0.795482	0.0207376
JINESH_BLEBBISHIELD_TRANSFORMED_STEM_CELL_SPHERES_DN	0.0918633	-0.074438	0.00654398	0.0877913	-0.0562538	0.821821	0.0953589	0.0148874	0.95545	0.103604	-0.0386014
JINESH_BLEBBISHIELD_TRANSFORMED_STEM_CELL_SPHERES_UP	0.0994002	-0.00141788	0.483703	0.0968746	-0.0656699	0.869387	0.101608	0.0128942	0.750278	0.889398	-0.0180646
JINESH_BLEBBISHIELD_VS_LIVE_CONTROL_DN	0.124203	0.0151532	0.117498	0.126241	0.0297021	0.884332	0.121487	-0.00318057	0.728656	0.523258	0.0138916
JINESH_BLEBBISHIELD_VS_LIVE_CONTROL_UP	0.0817499	-0.0417577	0.00836849	0.0808128	-0.0333561	0.92292	0.0795065	-0.0522333	0.0720373	0.0203492	-0.042449
JISON_SICKLE_CELL_DISEASE_DN	0.286174	-0.01972	0.000224676	0.277503	-0.0178045	0.902764	0.286954	-0.014479	0.15003	0.00199261	-0.0173345
JISON_SICKLE_CELL_DISEASE_UP	0.157623	0.0520988	0.0398328	0.147962	-0.04709	0.793322	0.147028	-0.0106321	0.693103	0.265495	-0.00187445
JOHANSSON_BRAIN_CANCER_EARLY_VS_LATE_DN	0.155775	0.0115809	0.634895	0.166056	0.027062	0.963657	0.154831	0.0168773	0.865211	0.973169	0.0185067
JOHANSSON_GLIOMAGENESIS_BY_PDGFB_UP	0.318712	-0.0071222	0.685806	0.315526	0.0238057	0.991867	0.311714	-0.0102474	0.711466	0.96265	0.00214538
JOHNSTONE_PARVB_TARGETS_1_DN	0.0876143	-0.058206	0.0476635	0.0863987	-0.0236333	0.857802	0.0899926	-0.0133882	0.983521	0.377075	-0.0317425
JOHNSTONE_PARVB_TARGETS_2_DN	0.0812733	-0.0268808	0.507715	0.0823352	0.0645523	0.85333	0.0854083	0.0071677	0.953972	0.939822	0.0149464
JOHNSTONE_PARVB_TARGETS_2_UP	0.225829	0.0215672	0.122391	0.21904	-0.0118276	0.801008	0.220848	-0.00153264	0.973698	0.58307	0.00273567
JOHNSTONE_PARVB_TARGETS_3_DN	0.108654	0.0280998	0.7958	0.0982725	0.0299467	0.860455	0.102043	-0.0277806	0.350538	0.826939	0.0100886
JOHNSTONE_PARVB_TARGETS_3_UP	0.141562	-0.0342957	0.141354	0.138463	-0.0682284	0.853158	0.149101	0.0280201	0.421846	0.428043	-0.0248347
JOSEPH_RESPONSE_TO_SODIUM_BUTYRATE_DN	0.110766	0.00773743	0.845452	0.102962	0.0165189	0.969924	0.113206	0.048042	0.223036	0.757529	0.0240994
JOSEPH_RESPONSE_TO_SODIUM_BUTYRATE_UP	0.271248	0.0107874	0.926183	0.261814	-0.0819232	0.890543	0.251525	0.0282179	0.261461	0.800245	-0.0143059
KAAB_FAILED_HEART_ATRIUM_DN	0.184947	-0.0430597	0.00116435	0.188045	-0.0333043	0.77435	0.183122	-0.0478627	0.00252452	0.000223978	-0.0414089
KAAB_FAILED_HEART_ATRIUM_UP	0.03478	0.094629	0.698649	0.0271582	-0.0703043	0.938843	0.0405524	0.148551	0.261321	0.740316	0.0576254
KAAB_FAILED_HEART_VENTRICLE_DN	0.103677	-0.0473943	0.135181	0.106858	-0.0143827	0.969924	0.101611	-0.0205522	0.592921	0.529944	-0.0274431
KAAB_HEART_ATRIUM_VS_VENTRICLE_DN	0.0870032	0.0479745	0.282021	0.0839208	0.00554862	0.969924	0.084265	0.0216553	0.910305	0.835841	0.0250595
KAAB_HEART_ATRIUM_VS_VENTRICLE_UP	0.0979781	-0.0245864	0.207561	0.0999354	-0.0194938	0.969733	0.101126	0.00584687	0.342501	0.499881	-0.0127444
KAMIKUBO_MYELOID_CEBPA_NETWORK	0.114008	0.0597759	0.153107	0.135471	0.149794	0.868792	0.105644	-0.026456	0.617689	0.54406	0.061038
KAMMINGA_EZH2_TARGETS	0.0589799	0.155574	0.907376	0.0352617	-0.0799683	0.972385	0.0470211	0.0314258	0.992256	0.999645	0.0356771
KAMMINGA_SENESCENCE	0.0702402	-0.0430346	0.445723	0.0679628	0.101363	0.760982	0.06689	-0.101483	0.692529	0.821632	-0.0143847
KAN_RESPONSE_TO_ARSENIC_TRIOXIDE	0.0956671	-0.0292704	0.483345	0.0947758	0.0124728	0.990711	0.0969903	0.0141937	0.70919	0.904413	-0.000867983
KANG_DOXORUBICIN_RESISTANCE_UP	0.0729771	0.473675	0.274968	0.0357442	-0.124608	0.983803	0.0454177	-0.0134488	0.861781	0.819763	0.111873
KANG_GLIS3_TARGETS	0.0635965	0.0994822	0.0161218	0.0541815	-0.0441014	0.950047	0.0558633	-0.0931626	0.953764	0.206801	-0.0125939
KANG_IMMORTALIZED_BY_TERT_DN	0.0284476	-0.0857299	0.329921	0.0267942	-0.115073	0.577327	0.0293626	-0.0251107	0.741231	0.688126	-0.0753046
KANG_IMMORTALIZED_BY_TERT_UP	0.0871671	0.0351876	0.0335833	0.088928	0.0305256	0.982217	0.0846174	-0.00740865	0.691016	0.271937	0.0194348
KANNAN_TP53_TARGETS_DN	0.0928143	0.00951429	0.87302	0.0822946	-0.0180968	0.98692	0.110375	0.184356	0.00684997	0.113929	0.0585912
KANNAN_TP53_TARGETS_UP	0.0540622	0.110299	0.632303	0.0589745	0.0878825	0.950047	0.0537603	0.101233	0.846961	0.968744	0.0998049
KARLSSON_TGFB1_TARGETS_DN	0.154957	-0.0487022	0.268966	0.155776	-0.0862211	0.961421	0.163729	0.0265469	0.587498	0.707932	-0.0361254
KARLSSON_TGFB1_TARGETS_UP	0.223866	-0.00127246	0.875828	0.186812	-0.0511643	0.969924	0.23007	0.0180543	0.883921	0.996833	-0.0114609
KASLER_HDAC7_TARGETS_1_UP	0.0419029	-0.0660985	0.051037	0.0470912	0.0365069	0.92401	0.0430614	-0.000202498	0.815394	0.367866	-0.00993137
KASLER_HDAC7_TARGETS_2_DN	0.0941762	-0.208082	0.00126462	0.0853884	-0.369833	0.406939	0.0944541	-0.1264	0.592921	0.012772	-0.234772
KATSANOU_ELAVL1_TARGETS_DN	0.0439752	-0.0742948	0.0979746	0.0405034	-0.0273016	0.869235	0.0483797	0.0620584	0.544969	0.407644	-0.0131793
KATSANOU_ELAVL1_TARGETS_UP	0.05978	0.0706772	0.0762901	0.0629539	0.00664592	0.939632	0.0567674	0.0174498	0.419496	0.320075	0.031591
KAUFFMANN_DNA_REPAIR_GENES	0.0587943	0.00129937	0.906248	0.0550133	0.0622598	0.847244	0.054634	-0.03875	0.628259	0.962234	0.00826973
KAUFFMANN_DNA_REPLICATION_GENES	0.084127	-0.0123247	0.403473	0.0740747	-0.040874	0.990599	0.0816741	0.00272796	0.853931	0.9054	-0.0168236
KAUFFMANN_MELANOMA_RELAPSE_UP	0.0635288	0.224041	0.692999	0.0387039	-0.0116745	0.969924	0.0498797	0.159056	0.896247	0.985091	0.123808
KAYO_AGING_MUSCLE_DN	0.175055	-0.00892394	0.496221	0.1755	0.0116623	0.96293	0.175749	0	0.969404	0.956851	0.00091277
KAYO_AGING_MUSCLE_UP	0.0550817	-0.0261484	0.254674	0.0515894	-0.104805	0.826428	0.0578998	0.0255677	0.99895	0.793779	-0.0351286
KAYO_CALORIE_RESTRICTION_MUSCLE_DN	0.127835	0.0309403	0.274817	0.127088	0.0163845	0.96293	0.128291	0.0212567	0.574175	0.707972	0.0228605
KAYO_CALORIE_RESTRICTION_MUSCLE_UP	0.119975	0.0468147	0.145084	0.1124	-0.0171725	0.969924	0.120804	0.0700365	0.238547	0.340866	0.0332262
KEGG_ABC_TRANSPORTERS	0.00906234	0.136605	0.873488	0.0145581	0.18799	0.92906	0.00203267	-1.54432	0.301977	0.831986	-0.406575
KEGG_ACUTE_MYELOID_LEUKEMIA	0.0740222	-0.067907	0.117936	0.0669521	-0.0369801	0.85348	0.0820782	0.0656599	0.28125	0.309073	-0.0130757
KEGG_ADHERENS_JUNCTION	0.109551	-0.0180195	0.112446	0.104774	-0.0581836	0.859829	0.113268	-0.0157372	0.892918	0.556815	-0.0306468
KEGG_ADIPOCYTOKINE_SIGNALING_PATHWAY	0.0468034	-0.16114	0.0104413	0.0441273	-0.190943	0.363564	0.0576033	0.090193	0.287868	0.0339509	-0.0872966
KEGG_ALANINE_ASPARTATE_AND_GLUTAMATE_METABOLISM	0.0348862	0.279793	0.0334388	0.0266282	0.29756	0.810591	0.0349529	0.171716	0.195921	0.10598	0.249689
KEGG_ALDOSTERONE_REGULATED_SODIUM_REABSORPTION	0.0450764	-0.148686	0.0947178	0.0441165	-0.166639	0.77435	0.0512309	0.0584079	0.715454	0.435072	-0.085639
KEGG_ALLOGRAFT_REJECTION	0.0201249	1.40342	0.0940876	0.0271159	0.278156	0.969924	0	NA	0.0807194	0.132365	NA
KEGG_ALZHEIMERS_DISEASE	0.304551	0.0134405	0.873488	0.28779	-0.0626697	0.92292	0.290279	-0.000158107	0.896247	0.995507	-0.0164625
KEGG_AMINO_SUGAR_AND_NUCLEOTIDE_SUGAR_METABOLISM	0.0347377	-0.165688	0.0499998	0.0396387	-0.106704	0.869235	0.034194	-0.10209	0.417298	0.236666	-0.124827
KEGG_AMINOACYL_TRNA_BIOSYNTHESIS	0.0604306	0.241357	0.014165	0.0466095	0.0975223	0.806778	0.0477799	0.149368	0.432947	0.100937	0.162749
KEGG_AMYOTROPHIC_LATERAL_SCLEROSIS_ALS	0.0811297	-0.0118176	0.944392	0.074325	-0.111684	0.834675	0.0788796	-0.0394747	0.451863	0.913662	-0.0543253
KEGG_ANTIGEN_PROCESSING_AND_PRESENTATION	0.209582	0.0534581	0.546956	0.208875	0.0145378	0.908558	0.182535	-0.0978011	0.0795211	0.373468	-0.00993505
KEGG_APOPTOSIS	0.0504741	-0.0357396	0.366891	0.0420879	-0.229068	0.524887	0.0541062	0.0397709	0.496152	0.583316	-0.0750122
KEGG_ARACHIDONIC_ACID_METABOLISM	0.0449808	-0.0216367	0.0181996	0.0459568	-0.0270988	0.689164	0.04519	-0.0105327	0.179471	0.0578045	-0.019756
KEGG_ARGININE_AND_PROLINE_METABOLISM	0.0650167	-0.00982384	0.981774	0.0580755	-0.0788009	0.865019	0.0590671	-0.109114	0.171112	0.69593	-0.0659129
KEGG_ARRHYTHMOGENIC_RIGHT_VENTRICULAR_CARDIOMYOPATHY_ARVC	0.0943541	0.0490254	0.131063	0.0938379	0.0397207	0.938843	0.102999	0.0881842	0.0171713	0.0552112	0.0589768
KEGG_AUTOIMMUNE_THYROID_DISEASE	0.0194129	1.48359	0.0807928	0.0248302	0.22648	0.975695	0	NA	0.0887358	0.127841	NA
KEGG_AXON_GUIDANCE	0.066673	0.0558448	0.504792	0.0652472	0.0176073	0.969924	0.0705266	0.0504745	0.507534	0.835346	0.0413089
KEGG_B_CELL_RECEPTOR_SIGNALING_PATHWAY	0.105908	-0.112975	8.15438e-05	0.104604	-0.0482166	0.760982	0.117346	-0.00166182	0.741231	0.00279915	-0.0542844
KEGG_BASAL_CELL_CARCINOMA	0.0145226	-0.0967532	0.39055	0.0158727	-0.225024	0.730816	0.0158517	-0.0768628	0.861781	0.832882	-0.13288
KEGG_BASAL_TRANSCRIPTION_FACTORS	0.0326295	0.142218	0.104326	0.0323036	0.0353571	0.98692	0.0269378	-0.137504	0.475276	0.419334	0.0133571
KEGG_BASE_EXCISION_REPAIR	0.0468515	-0.0314087	0.796188	0.0479051	0.0452594	0.956367	0.0506848	0.137823	0.75735	0.981495	0.0505577
KEGG_BETA_ALANINE_METABOLISM	0.0525868	-0.074087	0.721875	0.0540196	0.0275939	0.982217	0.0452184	-0.153309	0.038396	0.302102	-0.0666005
KEGG_BLADDER_CANCER	0.0922005	0.0509357	0.521285	0.0811757	0.0356874	0.999371	0.0973466	0.14531	0.00633293	0.0760114	0.0773111
KEGG_BUTANOATE_METABOLISM	0.0309691	-0.0467498	0.70828	0.0359345	0.00631377	0.969924	0.0327512	-0.0244779	0.809267	0.978142	-0.021638
KEGG_CALCIUM_SIGNALING_PATHWAY	0.0573696	0.00871286	0.955049	0.0548633	0.01469	0.955046	0.057554	-0.0209408	0.81607	0.996557	0.00082067
KEGG_CARDIAC_MUSCLE_CONTRACTION	0.299646	0.0326152	0.0656086	0.291969	0.0239073	0.969924	0.291322	0.0241433	0.294541	0.241504	0.0268886
KEGG_CELL_ADHESION_MOLECULES_CAMS	0.0356121	0.0499981	0.306291	0.040343	0.000456694	0.969924	0.0384277	0.0709887	0.410796	0.648709	0.0404812
KEGG_CELL_CYCLE	0.0941362	-0.0214571	0.602632	0.0871884	-0.0174628	0.969924	0.0886267	-0.0562666	0.825658	0.962292	-0.0317288
KEGG_CHEMOKINE_SIGNALING_PATHWAY	0.0617793	-0.0115431	0.360666	0.0588542	-0.0374086	0.770694	0.0646998	0.0194584	0.925086	0.843522	-0.00983111
KEGG_CHRONIC_MYELOID_LEUKEMIA	0.0789345	-0.114013	0.000181153	0.0714176	-0.0769767	0.793322	0.0857114	0.00421501	0.997735	0.00702754	-0.0622582
KEGG_CITRATE_CYCLE_TCA_CYCLE	0.0874076	0.0100608	0.98472	0.0806764	-0.154572	0.791009	0.0760897	-0.150098	0.526277	0.938491	-0.0982032
KEGG_COLORECTAL_CANCER	0.11716	-0.0261294	0.115137	0.102637	-0.150821	0.432425	0.116895	-0.0281401	0.538505	0.299408	-0.0683636
KEGG_COMPLEMENT_AND_COAGULATION_CASCADES	0.0130806	0.251723	0.0176704	0.0152042	0.352219	0.793322	0.0123435	0.278156	0.0223303	0.0130301	0.294033
KEGG_CYSTEINE_AND_METHIONINE_METABOLISM	0.0827255	0.00952144	0.757635	0.0749334	-0.0265046	0.92906	0.075605	-0.0795134	0.141835	0.594918	-0.0321655
KEGG_CYTOKINE_CYTOKINE_RECEPTOR_INTERACTION	0.0149347	0.0702366	0.869682	0.0158236	0.0422536	0.972385	0.0178366	0.316999	0.0159147	0.196335	0.143163
KEGG_CYTOSOLIC_DNA_SENSING_PATHWAY	0.0678895	-0.100563	0.038349	0.0572124	-0.198524	0.524887	0.0710011	-0.0287989	0.864908	0.230764	-0.109295
KEGG_DILATED_CARDIOMYOPATHY	0.0985861	0.0650712	3.83962e-05	0.0970661	0.0672143	0.643123	0.104648	0.105229	3.93205e-05	2.30206e-07	0.0791716
KEGG_DNA_REPLICATION	0.0326138	0.120767	0.822595	0.0277545	0.0602681	0.975393	0.027335	-0.0436086	0.650763	0.971678	0.0458087
KEGG_DRUG_METABOLISM_CYTOCHROME_P450	0.0223377	-0.181651	0.237284	0.0261783	-0.364141	0.669949	0.0133275	-0.319147	0.16468	0.295241	-0.288313
KEGG_DRUG_METABOLISM_OTHER_ENZYMES	0.0450117	0.0115687	0.980061	0.0394332	0.123512	0.955944	0.0498339	0.0548619	0.644445	0.985264	0.0633142
KEGG_ECM_RECEPTOR_INTERACTION	0.0972313	0.106435	0.013713	0.0893635	0.0344185	0.901015	0.110176	0.211849	8.65385e-05	0.000116825	0.117568
KEGG_ENDOCYTOSIS	0.0617366	0.0392775	0.206254	0.0582271	-0.0641232	0.938843	0.0633156	0.0822679	0.00474614	0.0298114	0.0191407
KEGG_ENDOMETRIAL_CANCER	0.072292	0.0121554	0.909801	0.0688811	0.0370893	0.969924	0.0774654	0.0651032	0.169201	0.703252	0.038116
KEGG_EPITHELIAL_CELL_SIGNALING_IN_HELICOBACTER_PYLORI_INFECTION	0.113671	-0.0753661	0.00511426	0.109008	-0.0902	0.60613	0.122031	-0.00795636	0.712532	0.0570172	-0.0578408
KEGG_ERBB_SIGNALING_PATHWAY	0.0616616	-0.0120287	0.592882	0.0594562	0.011806	1	0.064089	0.0134167	0.837997	0.965919	0.004398
KEGG_ETHER_LIPID_METABOLISM	0.048089	-0.0357932	0.291559	0.0484874	-0.000382323	0.972385	0.0501966	-0.0532982	0.36344	0.603302	-0.0298246
KEGG_FATTY_ACID_METABOLISM	0.0617201	0.0660574	0.32534	0.0621035	0.00832346	0.991867	0.0675148	0.139684	0.19434	0.476828	0.0713549
KEGG_FC_EPSILON_RI_SIGNALING_PATHWAY	0.0366406	-0.0326516	0.664025	0.0351666	-0.0113567	0.996012	0.0401394	0.0656879	0.806876	0.974027	0.00722654
KEGG_FC_GAMMA_R_MEDIATED_PHAGOCYTOSIS	0.0935588	-0.0441619	0.0195881	0.0915671	-0.0639545	0.865019	0.0972979	0.0042338	0.754706	0.190037	-0.0346276
KEGG_FOCAL_ADHESION	0.103492	0.0322193	0.146036	0.0966853	-0.0161635	0.996379	0.11122	0.0909713	0.00223623	0.0134303	0.0356757
KEGG_FRUCTOSE_AND_MANNOSE_METABOLISM	0.0768428	-0.0372972	0.0558991	0.0821954	-0.135636	0.741848	0.0784128	-0.00792638	0.758598	0.328478	-0.0602866
KEGG_GALACTOSE_METABOLISM	0.0466721	-0.163599	0.118793	0.0603061	-0.126552	0.864725	0.0454066	-0.179361	0.204128	0.258603	-0.156504
KEGG_GAP_JUNCTION	0.100691	0.00191357	0.993783	0.100429	0.0211764	0.969924	0.101835	0.0247238	0.925086	0.99977	0.0159379
KEGG_GLIOMA	0.101929	-0.00208809	0.787918	0.0925482	-0.0386962	0.950047	0.109212	0.061761	0.0960235	0.510235	0.00699223
KEGG_GLUTATHIONE_METABOLISM	0.100002	-0.0605223	0.214743	0.0926094	-0.142288	0.841961	0.0886253	-0.0883794	0.155023	0.307285	-0.0970631
KEGG_GLYCEROLIPID_METABOLISM	0.0427935	0.110183	0.0335833	0.039783	0.0148797	0.969924	0.0393748	0.0565586	0.377941	0.185466	0.0605404
KEGG_GLYCEROPHOSPHOLIPID_METABOLISM	0.0119319	0.1122	0.0683591	0.0108658	0.142813	0.918473	0.0119739	0.154114	0.403411	0.289547	0.136376
KEGG_GLYCINE_SERINE_AND_THREONINE_METABOLISM	0.0253675	0.218454	0.115951	0.0132732	-0.364411	0.901015	0.0160055	-0.0539847	0.803778	0.54966	-0.0666474
KEGG_GLYCOLYSIS_GLUCONEOGENESIS	0.185844	-0.0180587	0.624067	0.186621	-0.0496513	0.864349	0.185732	-0.0137419	0.87228	0.958972	-0.0271506
KEGG_GLYCOSAMINOGLYCAN_BIOSYNTHESIS_HEPARAN_SULFATE	0.00875398	0.35739	0.410379	0.00464465	-0.350018	0.889029	0.012942	0.203214	0.75735	0.860272	0.0701955
KEGG_GLYCOSPHINGOLIPID_BIOSYNTHESIS_LACTO_AND_NEOLACTO_SERIES	0.00860704	-0.116752	0.887572	0.0185497	-0.0191088	0.969924	0.0160599	0.346577	0.0784996	0.494981	0.0702388
KEGG_GLYCOSYLPHOSPHATIDYLINOSITOL_GPI_ANCHOR_BIOSYNTHESIS	0	NA	0.27968	0.00651358	0.00320243	0.998014	0	NA	0.705633	0.776941	NA
KEGG_GNRH_SIGNALING_PATHWAY	0.0884898	-0.00305509	0.766313	0.0860384	0.0221154	0.969924	0.0899223	0.0154727	0.976629	0.995683	0.011511
KEGG_GRAFT_VERSUS_HOST_DISEASE	0.0261393	0.742176	0.0106861	0.0317681	0.326019	0.958906	0	#NAME?	0.541284	0.109191	#NAME?
KEGG_HEDGEHOG_SIGNALING_PATHWAY	0.0259156	0.033207	0.704893	0.0235801	-0.136251	0.821821	0.0268622	0.00417326	0.640871	0.92137	-0.032957
KEGG_HEMATOPOIETIC_CELL_LINEAGE	0.0400983	0.0790112	0.481819	0.0359986	0.0140355	0.972385	0.0425288	0.128277	0.0843847	0.373562	0.0737746
KEGG_HISTIDINE_METABOLISM	0.025054	0.00153724	0.606396	0.0296566	0.0725326	0.936688	0.0214787	-0.214434	0.113829	0.484196	-0.046788
KEGG_HOMOLOGOUS_RECOMBINATION	0.0220111	-0.0385698	0.7442	0.0191817	-0.113309	0.969924	0.0269903	0.20862	0.362955	0.847931	0.0189136
KEGG_HUNTINGTONS_DISEASE	0.321378	0.010888	0.993901	0.303673	-0.0489272	0.908558	0.307584	0.00129242	0.979973	0.999722	-0.0122489
KEGG_HYPERTROPHIC_CARDIOMYOPATHY_HCM	0.0959918	0.0868459	1.36155e-05	0.0958324	0.100731	0.598862	0.102121	0.120045	8.65385e-05	1.72231e-07	0.102541
KEGG_INOSITOL_PHOSPHATE_METABOLISM	0.0202539	0.019793	0.527551	0.0219165	-0.0176155	0.969924	0.0195606	-0.11769	0.459085	0.821643	-0.0385043
KEGG_INSULIN_SIGNALING_PATHWAY	0.0653242	-0.0650893	0.0281346	0.0648381	-0.0786168	0.511056	0.0667975	-0.0354146	0.583977	0.144454	-0.0597069
KEGG_INTESTINAL_IMMUNE_NETWORK_FOR_IGA_PRODUCTION	0.0159725	0.445528	0.308994	0.0214796	0.0689269	0.972385	0.00507145	-0.99876	0.130736	0.372234	-0.161435
KEGG_JAK_STAT_SIGNALING_PATHWAY	0.0302615	-0.0560249	0.275151	0.032	-0.00749454	0.969924	0.035454	0.144255	0.234704	0.476538	0.0269117
KEGG_LEISHMANIA_INFECTION	0.0925472	-0.113639	0.0260943	0.0862423	-0.191979	0.513941	0.0955294	-0.0520497	0.638966	0.146416	-0.119222
KEGG_LEUKOCYTE_TRANSENDOTHELIAL_MIGRATION	0.134403	0.0392663	0.138247	0.12038	-0.0670049	0.950047	0.138995	0.0357783	0.562742	0.517203	0.00267994
KEGG_LONG_TERM_DEPRESSION	0.0823406	-0.00278782	0.983572	0.0800025	0.00690947	0.91764	0.084755	0.0123061	0.900953	0.998736	0.00547593
KEGG_LONG_TERM_POTENTIATION	0.0883969	-0.0655997	0.0365339	0.0920209	0.0253424	0.980188	0.0930474	-0.0371711	0.374287	0.195822	-0.0258095
KEGG_LYSINE_DEGRADATION	0.0374085	-0.16465	0.0255925	0.0361711	-0.0853555	0.810225	0.0458696	-0.0152668	0.485025	0.162697	-0.0884243
KEGG_LYSOSOME	0.0656121	-0.0319358	0.280055	0.0693722	-0.0856109	0.760982	0.0703787	0.0362664	0.424266	0.568844	-0.0270934
KEGG_MAPK_SIGNALING_PATHWAY	0.0595272	-0.0569231	0.0807404	0.0565234	-0.11724	0.577327	0.0615555	-0.0019884	0.917497	0.390018	-0.0587171
KEGG_MELANOGENESIS	0.0649653	-0.00873321	0.487624	0.0616105	-0.0541126	0.92401	0.0677185	0.0107353	0.943752	0.944326	-0.0173702
KEGG_MELANOMA	0.0600955	0.00254621	0.858414	0.0515343	-0.119795	0.98702	0.0678312	0.125725	0.00505713	0.0913451	0.00282557
KEGG_METABOLISM_OF_XENOBIOTICS_BY_CYTOCHROME_P450	0.0223377	-0.178516	0.215529	0.0261783	-0.358636	0.669949	0.0133275	-0.315165	0.167383	0.281615	-0.284106
KEGG_MISMATCH_REPAIR	0.0368895	0.0752002	0.961658	0.0253802	-0.244721	0.998014	0.0345751	0.0978473	0.526737	0.967995	-0.0238911
KEGG_MTOR_SIGNALING_PATHWAY	0.0753889	-0.0375497	0.311879	0.0727237	-0.0692401	0.595339	0.0765321	0.0289783	0.968188	0.752969	-0.0259372
KEGG_N_GLYCAN_BIOSYNTHESIS	0.073849	0.175245	0.0265302	0.0712929	0.0151864	0.969924	0.0730132	0.08537	0.0902193	0.0591085	0.0919339
KEGG_NATURAL_KILLER_CELL_MEDIATED_CYTOTOXICITY	0.0317158	-0.00181523	0.717703	0.0345509	0.124346	0.917448	0.0328955	-0.0159905	0.983521	0.990096	0.0355135
KEGG_NEUROACTIVE_LIGAND_RECEPTOR_INTERACTION	0.00655563	0.0196059	0.115181	0.00642416	-0.000567655	0.969924	0.00672502	0.0485356	0.00189851	0.00959333	0.0225246
KEGG_NEUROTROPHIN_SIGNALING_PATHWAY	0.125164	-0.0647609	0.000334512	0.119659	-0.112111	0.733064	0.128419	-0.0558131	0.213583	0.00311305	-0.0775618
KEGG_NICOTINATE_AND_NICOTINAMIDE_METABOLISM	0.0262436	0.372066	0.0413407	0.0192684	-0.138631	0.950047	0.0290458	0.312976	0.145013	0.111191	0.182137
KEGG_NOD_LIKE_RECEPTOR_SIGNALING_PATHWAY	0.0721642	-0.147367	0.000376265	0.0732142	-0.0866122	0.562156	0.0785116	-0.0443341	0.73841	0.00752393	-0.0927709
KEGG_NON_SMALL_CELL_LUNG_CANCER	0.0647717	-0.0339793	0.49503	0.0598389	-0.0925717	0.951832	0.0684971	-0.00778201	0.918147	0.946974	-0.0447777
KEGG_NOTCH_SIGNALING_PATHWAY	0.0328812	-0.0926743	0.0968488	0.0392512	-0.0794136	0.942489	0.0326511	-0.0274278	0.978021	0.565519	-0.0665052
KEGG_NUCLEOTIDE_EXCISION_REPAIR	0.0633322	-0.0255769	0.96942	0.0591582	-0.01879	0.92906	0.0626525	-0.0250633	0.851009	0.997428	-0.0231434
KEGG_O_GLYCAN_BIOSYNTHESIS	0.0288056	0.42415	0.00126981	0.0279317	0.531461	0.854652	0.0348239	0.431526	0.000451771	5.93555e-05	0.462379
KEGG_OLFACTORY_TRANSDUCTION	0.035508	0.0475179	0.14468	0.0309844	-0.0565485	0.955046	0.0357381	0.066117	0.189231	0.295031	0.0190288
KEGG_OOCYTE_MEIOSIS	0.102335	-0.0358348	0.120435	0.101543	-0.00386292	0.948413	0.100306	-0.0701108	0.194341	0.267646	-0.0366029
KEGG_OXIDATIVE_PHOSPHORYLATION	0.417022	0.0105015	0.98472	0.389636	-0.056178	0.969924	0.396009	-0.00964794	0.875765	0.999169	-0.0184415
KEGG_P53_SIGNALING_PATHWAY	0.0858963	0.0434489	0.293367	0.0796628	0.0229585	0.950047	0.0852153	0.106987	0.0447976	0.187151	0.057798
KEGG_PANCREATIC_CANCER	0.0821583	-0.0828358	0.00138752	0.0751082	-0.113166	0.305541	0.0906164	0.0355415	0.411781	0.00822091	-0.0534866
KEGG_PARKINSONS_DISEASE	0.455643	0.019777	0.829721	0.420429	-0.0503778	0.96853	0.438338	0.00599874	0.980506	0.998111	-0.00820068
KEGG_PATHOGENIC_ESCHERICHIA_COLI_INFECTION	0.31273	-0.0376891	0.688985	0.317504	-0.00753502	0.991867	0.31146	-0.0276304	0.883921	0.9853	-0.0242848
KEGG_PATHWAYS_IN_CANCER	0.0903838	-0.00121949	0.571	0.0860475	-0.0171549	0.821275	0.0968118	0.0739227	0.0353243	0.223752	0.0185161
KEGG_PENTOSE_PHOSPHATE_PATHWAY	0.147587	0.0250268	0.731123	0.128058	-0.0959582	0.847244	0.152816	0.0445455	0.393692	0.830803	-0.00879531
KEGG_PEROXISOME	0.0461571	0.0231211	0.607239	0.0498077	-0.00590719	0.979371	0.0490739	0.0735264	0.159678	0.5817	0.0302467
KEGG_PHOSPHATIDYLINOSITOL_SIGNALING_SYSTEM	0.0318687	0.0141613	0.487792	0.0315319	-0.0307238	0.901015	0.0310778	-0.0367213	0.233481	0.602212	-0.0177613
KEGG_PORPHYRIN_AND_CHLOROPHYLL_METABOLISM	0.0653966	-0.013475	0.670504	0.0724005	0.0783865	0.805255	0.0651832	-0.0347162	0.526277	0.866617	0.0100651
KEGG_PPAR_SIGNALING_PATHWAY	0.0625282	0.0398252	0.127469	0.0643996	0.133751	0.864349	0.0702143	0.182503	0.000215794	0.00162447	0.118693
KEGG_PRIMARY_IMMUNODEFICIENCY	0.00953684	0.568624	0.62099	0.0113617	0.178918	0.936665	0	#NAME?	0.257319	0.703907	#NAME?
KEGG_PRION_DISEASES	0.103634	-0.0320955	0.432587	0.0789751	-0.338621	0.305541	0.103051	0.0176826	0.966114	0.66095	-0.117678
KEGG_PROGESTERONE_MEDIATED_OOCYTE_MATURATION	0.0530887	0.0131003	0.94273	0.0508116	-0.0545269	0.916006	0.0548765	0.0456122	0.658232	0.98021	0.00139519
KEGG_PROPANOATE_METABOLISM	0.0574884	0.0014071	0.773429	0.063541	0.0679991	0.972385	0.0554821	-0.0901007	0.325925	0.832043	-0.00689815
KEGG_PROSTATE_CANCER	0.0907068	-0.0810827	0.00126981	0.0894747	-0.0103429	0.86275	0.0978948	0.047909	0.649757	0.0245667	-0.0145055
KEGG_PROTEASOME	0.449228	0.00537823	0.875828	0.380337	-0.116897	0.928654	0.437479	-0.0105313	0.417663	0.904473	-0.0406834
KEGG_PROTEIN_EXPORT	0.251844	0.0829516	0.0053831	0.243851	0.116086	0.887736	0.251831	0.109795	0.0444799	0.00960996	0.102944
KEGG_PURINE_METABOLISM	0.0705294	0.0291652	0.487624	0.069781	0.022608	1	0.0703386	0.0395856	0.256795	0.655659	0.0304529
KEGG_PYRIMIDINE_METABOLISM	0.0706192	0.0272804	0.499402	0.073221	0.125838	0.92906	0.0697904	0.048921	0.895265	0.940626	0.0673464
KEGG_PYRUVATE_METABOLISM	0.108249	0.0287548	0.496035	0.112221	0.0142246	0.951371	0.103121	-0.0472717	0.253417	0.643241	-0.00143077
KEGG_REGULATION_OF_ACTIN_CYTOSKELETON	0.122847	0.00277166	0.668802	0.119711	0.0112948	0.991012	0.128209	0.0360602	0.122572	0.54116	0.0167089
KEGG_RENAL_CELL_CARCINOMA	0.112088	-0.0479632	0.0128802	0.108299	-0.0593074	0.85348	0.121188	0.026179	0.596181	0.122338	-0.0270305
KEGG_RETINOL_METABOLISM	0.0111637	-0.0651376	0.858302	0.0126768	-0.259629	0.901015	0.0119931	-0.0372673	0.914096	0.994626	-0.120678
KEGG_RIBOSOME	0.871035	-0.00455926	0.0808262	0.89129	0.00607564	0.513941	0.859139	-0.00551373	0.181877	0.13463	-0.00133245
KEGG_RIG_I_LIKE_RECEPTOR_SIGNALING_PATHWAY	0.0355822	-0.204914	0.0103543	0.0289493	-0.319951	0.492562	0.0388722	-0.0503555	0.674959	0.0783314	-0.19174
KEGG_RNA_DEGRADATION	0.100784	0.106719	0.338141	0.0864751	0.10582	0.818115	0.093674	0.00402837	0.925086	0.842387	0.0721891
KEGG_RNA_POLYMERASE	0.118616	-0.0576776	0.240964	0.131398	-0.00285149	0.962459	0.10933	-0.065025	0.26327	0.47042	-0.0418514
KEGG_SELENOAMINO_ACID_METABOLISM	0.00873783	-0.173238	0.789771	0.0107114	0.0224946	0.999371	0.00943084	0.100194	0.919694	0.995682	-0.0168496
KEGG_SMALL_CELL_LUNG_CANCER	0.103677	0.0425994	0.21123	0.0928414	-0.0379599	0.962459	0.117616	0.162561	0.000210006	0.00263329	0.0557334
KEGG_SNARE_INTERACTIONS_IN_VESICULAR_TRANSPORT	0.0202033	0.0409079	0.272358	0.0284259	0.0717682	0.969924	0.0234619	0.0725951	0.81607	0.800156	0.0617571
KEGG_SPHINGOLIPID_METABOLISM	0.0284322	0.188328	0.0815616	0.0312258	0.183423	0.908558	0.0312556	0.277423	0.00271116	0.00919056	0.216391
KEGG_SPLICEOSOME	0.208743	-0.0733373	0.0428203	0.18519	-0.087332	0.868792	0.203882	-0.0515164	0.0869237	0.0749389	-0.0707286
KEGG_STARCH_AND_SUCROSE_METABOLISM	0.0341523	-0.27347	0.00151288	0.0439208	-0.107846	0.847244	0.0319581	-0.152283	0.322716	0.0161887	-0.177866
KEGG_SYSTEMIC_LUPUS_ERYTHEMATOSUS	0.102634	0.0147947	0.905379	0.097636	-0.0119068	0.969924	0.0957322	-0.0660107	0.259461	0.814078	-0.0210409
KEGG_T_CELL_RECEPTOR_SIGNALING_PATHWAY	0.0737385	-0.140299	0.000190644	0.0741533	-0.0442648	0.733064	0.0824284	0.0125337	0.992256	0.00684218	-0.0573435
KEGG_TASTE_TRANSDUCTION	0.0637864	0.0313952	0.51596	0.0632455	-0.0294374	0.969924	0.0634674	-0.0131811	0.650574	0.895913	-0.0037411
KEGG_TGF_BETA_SIGNALING_PATHWAY	0.063956	-0.0392046	0.396962	0.070621	0.0732004	0.942489	0.0628294	-0.0375682	0.259461	0.587493	-0.00119079
KEGG_THYROID_CANCER	0.124003	0.0204774	0.863374	0.110609	0.000522117	0.92292	0.130526	0.0530137	0.126302	0.597047	0.0246711
KEGG_TIGHT_JUNCTION	0.121561	0.00893009	0.664225	0.115402	-0.0344451	0.931298	0.122704	-0.0206905	0.726695	0.952641	-0.0154018
KEGG_TOLL_LIKE_RECEPTOR_SIGNALING_PATHWAY	0.0689043	-0.100118	0.00326299	0.0619722	-0.170775	0.293919	0.0706026	-0.0171201	0.927105	0.0290771	-0.0960043
KEGG_TRYPTOPHAN_METABOLISM	0.02278	-0.0955263	0.428642	0.0247397	-0.0847133	0.901015	0.0210941	-0.188224	0.0724984	0.307098	-0.122821
KEGG_TYPE_I_DIABETES_MELLITUS	0.0578471	0.314539	0.00390769	0.0609182	0.162512	0.865019	0.041606	-0.0541599	0.75735	0.0634236	0.140964
KEGG_TYPE_II_DIABETES_MELLITUS	0.0340681	-0.20323	0.0137866	0.0429125	-0.0800776	0.594192	0.0317719	-0.18223	0.0795211	0.0229611	-0.155179
KEGG_TYROSINE_METABOLISM	0.0488899	0.0552123	0.074556	0.051562	-0.0202201	0.942489	0.0515728	0.0780363	0.377245	0.297419	0.0376762
KEGG_UBIQUITIN_MEDIATED_PROTEOLYSIS	0.0884995	-0.0595255	0.0126059	0.083766	-0.0736619	0.451646	0.0876708	-0.0747239	0.0219965	0.00630598	-0.0693038
KEGG_VALINE_LEUCINE_AND_ISOLEUCINE_DEGRADATION	0.0301602	0.00913583	0.993005	0.0346898	0.0249579	0.954779	0.0329208	0.0477113	0.741436	0.994384	0.0272683
KEGG_VASCULAR_SMOOTH_MUSCLE_CONTRACTION	0.0705604	-0.0271731	0.797191	0.0703639	0.0097183	0.959746	0.0706247	-0.0505941	0.0972253	0.518813	-0.022683
KEGG_VASOPRESSIN_REGULATED_WATER_REABSORPTION	0.0730917	-0.0543459	0.229817	0.0781718	-0.0379323	0.950047	0.0733531	-0.0246388	0.698204	0.708857	-0.0389723
KEGG_VEGF_SIGNALING_PATHWAY	0.0523386	-0.041663	0.30086	0.052139	-0.0633973	0.932324	0.0558677	-0.0291328	0.698204	0.775466	-0.044731
KEGG_VIBRIO_CHOLERAE_INFECTION	0.154502	-0.00716755	0.741668	0.162295	-0.0249066	0.951832	0.155845	-0.00381571	0.497317	0.910902	-0.0119633
KEGG_VIRAL_MYOCARDITIS	0.116902	0.0285206	0.377757	0.110184	-0.0266538	0.931093	0.113506	-0.0140828	0.86127	0.880732	-0.004072
KEGG_WNT_SIGNALING_PATHWAY	0.0645349	-0.0568578	0.0494429	0.0604867	-0.0911199	0.750722	0.0642838	-0.0722829	0.065021	0.060788	-0.0734202
KENNY_CTNNB1_TARGETS_DN	0.160266	-0.0561768	0.0285657	0.162474	-0.0227263	0.903309	0.172443	0.0267418	0.727937	0.241822	-0.0173871
KENNY_CTNNB1_TARGETS_UP	0.110875	0.0864767	0.0287229	0.10137	0.103124	0.669949	0.103711	0.0737185	0.527906	0.163764	0.0877729
KERLEY_RESPONSE_TO_CISPLATIN_UP	0.124947	-0.0759975	0.115589	0.121737	-0.111426	0.882721	0.122887	-0.0434926	0.463938	0.41198	-0.076972
KESHELAVA_MULTIPLE_DRUG_RESISTANCE	0.0743619	0.00459921	0.555041	0.0765162	-0.0482719	0.993525	0.0780184	0.0227768	0.634664	0.910301	-0.00696532
KHETCHOUMIAN_TRIM24_TARGETS_UP	0.263668	0.000868361	0.981844	0.254831	0.0219931	0.864349	0.266524	0.0344596	0.836355	0.994796	0.019107
KIM_ALL_DISORDERS_CALB1_CORR_DN	0.038446	-0.0385027	0.443516	0.0346909	-0.0320744	0.980188	0.0407857	0.114796	0.000898739	0.0154875	0.0147397
KIM_ALL_DISORDERS_CALB1_CORR_UP	0.179306	-0.000267173	0.349081	0.173943	-0.0244298	0.916006	0.180658	0.0104468	0.701986	0.810345	-0.00475006
KIM_ALL_DISORDERS_DURATION_CORR_DN	0.194517	-0.027675	0.434206	0.191718	-0.0466785	0.85348	0.19267	-0.00786345	0.671659	0.835747	-0.0274056
KIM_ALL_DISORDERS_OLIGODENDROCYTE_NUMBER_CORR_DN	0.0533981	-0.117954	0.0492054	0.04638	0.103733	0.901015	0.0728433	0.153163	0.625308	0.305323	0.046314
KIM_ALL_DISORDERS_OLIGODENDROCYTE_NUMBER_CORR_UP	0.250392	0.00730752	0.760357	0.249543	-0.00546012	0.92401	0.245359	-0.00540181	0.881601	0.987153	-0.0011848
KIM_BIPOLAR_DISORDER_OLIGODENDROCYTE_DENSITY_CORR_DN	0.0121864	0.223134	0.267757	0.0137762	0.677679	0.795785	0.00880026	-0.0254271	0.639277	0.67843	0.291795
KIM_BIPOLAR_DISORDER_OLIGODENDROCYTE_DENSITY_CORR_UP	0.271741	0.018341	0.706012	0.267763	-0.00229777	0.942489	0.264331	-0.00373769	0.866206	0.98145	0.00410184
KIM_GASTRIC_CANCER_CHEMOSENSITIVITY	0.0386246	-0.0166496	0.830556	0.0366863	-0.0516022	0.969924	0.0378683	0.00986788	0.698204	0.979241	-0.0194613
KIM_GERMINAL_CENTER_T_HELPER_UP	0.0582252	-0.065615	0.282752	0.0499159	0.00665726	0.972385	0.0618053	-0.00886603	0.72308	0.779365	-0.0226079
KIM_GLIS2_TARGETS_UP	0.1129	0.00452247	0.907551	0.122284	0.0447504	0.972385	0.102903	-0.0734737	0.462783	0.937881	-0.00806696
KIM_LIVER_CANCER_POOR_SURVIVAL_DN	0.00674531	-0.09659	0.600532	0.0072341	-0.539485	0.948095	0.0072341	-0.554312	0.466165	0.850977	-0.396796
KIM_LIVER_CANCER_POOR_SURVIVAL_UP	0.260659	-0.0349282	0.0204748	0.260809	0.0110424	0.970443	0.269577	-0.013881	0.973698	0.24624	-0.012589
KIM_MYC_AMPLIFICATION_TARGETS_DN	0.0249956	-0.038501	0.568374	0.0278632	0.171298	0.918473	0.0293743	0.106248	0.24073	0.65663	0.0796817
KIM_MYC_AMPLIFICATION_TARGETS_UP	0.13676	-0.0072561	0.97013	0.12938	0.0110848	0.92906	0.132964	-0.01592	0.795426	0.995204	-0.00403046
KIM_MYCN_AMPLIFICATION_TARGETS_DN	0.0431122	0.0175164	0.948075	0.0421663	-0.02831	0.981018	0.0468724	0.138025	0.147201	0.679804	0.0424106
KIM_MYCN_AMPLIFICATION_TARGETS_UP	0.0501596	-0.0812893	0.200096	0.0532963	-0.0958068	0.643123	0.0506457	-0.114593	0.065473	0.144783	-0.0972296
KIM_RESPONSE_TO_TSA_AND_DECITABINE_UP	0.0633326	0.0913866	0.025032	0.0603987	0.070698	0.910901	0.0689523	0.21192	5.392e-05	0.000131812	0.124668
KIM_TIAL1_TARGETS	0.164482	0.00395058	0.99464	0.166602	0.00311934	0.955046	0.157221	-0.0333384	0.447405	0.944244	-0.00875615
KIM_WT1_TARGETS_12HR_DN	0.139773	-0.0476597	0.0433582	0.132072	0.00633081	0.995918	0.141637	-0.0301049	0.0960235	0.0892761	-0.0238113
KIM_WT1_TARGETS_12HR_UP	0.0697789	-0.0342568	0.150987	0.0653725	-0.0740556	0.864725	0.0737711	0.045555	0.544969	0.507706	-0.0209192
KIM_WT1_TARGETS_8HR_DN	0.0778935	-0.00658324	0.392263	0.0768247	0.0394956	0.922999	0.0716486	-0.0867263	0.00708141	0.0634925	-0.017938
KIM_WT1_TARGETS_8HR_UP	0.107328	-0.0926725	0.00132686	0.0976952	-0.155478	0.62446	0.115019	0.0443653	0.840911	0.0241695	-0.0679284
KIM_WT1_TARGETS_DN	0.0863815	-0.0251039	0.175915	0.0796439	-0.0465792	0.857802	0.0859883	-0.00340692	0.828552	0.655247	-0.02503
KIM_WT1_TARGETS_UP	0.104288	-0.120108	0.00382093	0.0993199	-0.110236	0.733064	0.115245	0.00087316	0.987503	0.0670433	-0.0764902
KINSEY_TARGETS_OF_EWSR1_FLII_FUSION_DN	0.0808859	-0.0779018	0.014165	0.0848137	-0.0898426	0.865019	0.0814405	-0.066403	0.608433	0.133434	-0.0780491
KINSEY_TARGETS_OF_EWSR1_FLII_FUSION_UP	0.124679	0.0110677	0.717989	0.110893	0.000153598	0.969924	0.123365	0.0198384	0.967962	0.992371	0.0103532
KLEIN_PRIMARY_EFFUSION_LYMPHOMA_DN	0.0783574	0.078502	0.292816	0.0739948	-0.0873623	0.928654	0.0683116	0.0672401	0.832151	0.81236	0.0194599
KLEIN_PRIMARY_EFFUSION_LYMPHOMA_UP	0.0769108	-0.0143144	0.753124	0.074519	-0.0814491	0.699152	0.0876855	0.0664718	0.362417	0.768693	-0.00976389
KLEIN_TARGETS_OF_BCR_ABL1_FUSION	0.0296367	0.0272877	0.948313	0.0318261	0.0475215	0.950047	0.0267016	0.00989182	0.677077	0.986042	0.0282337
KOBAYASHI_EGFR_SIGNALING_24HR_DN	0.099113	0.121764	0.8568	0.0723552	-0.100119	0.958906	0.0852334	-0.00719682	0.821715	0.99245	0.00481605
KOBAYASHI_EGFR_SIGNALING_24HR_UP	0.0938511	0.0168083	0.419625	0.0991787	0.0342253	0.991867	0.0946103	0.0380582	0.38542	0.72258	0.0296972
KOHOUTEK_CCNT1_TARGETS	0.127134	0.138807	0.00291265	0.124891	0.0684636	0.702002	0.137151	0.223713	1.06688e-05	3.80087e-06	0.143661
KOHOUTEK_CCNT2_TARGETS	0.0167409	-0.0131183	0.968137	0.0193697	0.142393	0.730816	0.022297	0.110108	0.629137	0.951219	0.0797943
KOINUMA_TARGETS_OF_SMAD2_OR_SMAD3	0.138856	-0.00336932	0.532102	0.131488	-0.018815	0.969924	0.144039	0.0352684	0.301977	0.714813	0.00436138
KOKKINAKIS_METHIONINE_DEPRIVATION_48HR_DN	0.102781	0.0371558	0.300885	0.0901697	0.0162076	0.969924	0.102943	0.0645044	0.404291	0.639601	0.0392893
KOKKINAKIS_METHIONINE_DEPRIVATION_48HR_UP	0.0939393	0.0585861	0.0588035	0.0951208	0.024762	0.92906	0.0917936	0.0532632	0.761952	0.384302	0.0455371
KOKKINAKIS_METHIONINE_DEPRIVATION_96HR_DN	0.101362	0.0266196	0.376288	0.086201	-0.0191909	0.991012	0.103536	0.0974146	0.156385	0.459535	0.0349478
KOKKINAKIS_METHIONINE_DEPRIVATION_96HR_UP	0.0967737	0.0742592	0.0277806	0.0971221	0.00336053	0.826428	0.0910147	-0.00863031	0.963489	0.267084	0.0229965
KONDO_COLON_CANCER_HCP_WITH_H3K27ME1	0.0375878	-0.0063466	0.941319	0.040194	0.0972972	0.864725	0.04158	0.0467483	0.425901	0.908461	0.0458996
KONDO_EZH2_TARGETS	0.0380548	-0.0294316	0.803151	0.0427737	0.0442802	0.938843	0.0411828	0.00156715	0.889761	0.992121	0.00547191
KONDO_PROSTATE_CANCER_HCP_WITH_H3K27ME3	0.0218732	-0.0981411	0.0370631	0.0217736	-0.221535	0.788091	0.0220906	-0.0969307	0.499571	0.206656	-0.138869
KONDO_PROSTATE_CANCER_WITH_H3K27ME3	0.00724355	0.325354	0.000451884	0.00853418	0.325159	0.432425	0.00728556	0.176746	0.116358	0.00156535	0.275753
KONG_E2F3_TARGETS	0.0552832	0.320484	0.455053	0.0341558	0.0341086	0.954779	0.0398338	0.0659293	0.650574	0.86543	0.140174
KORKOLA_CORRELATED_WITH_POU5F1	0.00918858	1.08092	0.1143	0.00021847	-3.48239	0.991867	0.00753078	0.80674	0.428538	0.41773	-0.531578
KORKOLA_EMBRYONAL_CARCINOMA_UP	0.0975545	-0.0144318	0.927977	0.100818	-0.0274139	0.702835	0.0971787	-0.0342891	0.682351	0.951188	-0.0253783
KORKOLA_SEMINOMA_UP	0.0852553	-0.000719369	0.942479	0.0833503	-0.0521835	0.718187	0.085638	-0.0131207	0.500211	0.903817	-0.0220079
KORKOLA_TERATOMA	0.149928	-0.0531593	0.521074	0.141233	-0.0943225	0.995918	0.146127	-0.0772395	0.74718	0.929114	-0.0749071
KORKOLA_YOLK_SAC_TUMOR	0.0206186	-0.0856943	0.222272	0.0295241	0.375029	0.451646	0.0209688	-0.104316	0.779444	0.53159	0.0616732
KOYAMA_SEMA3B_TARGETS_DN	0.0824871	0.00299266	0.973239	0.0831793	0.0427809	0.730816	0.0821621	-0.0171034	0.922797	0.990896	0.00955673
KOYAMA_SEMA3B_TARGETS_UP	0.0632021	0.0226112	0.0415897	0.0656465	0.0536216	0.969924	0.0612415	0.0217163	0.0485407	0.0522382	0.0326497
KRASNOSELSKAYA_ILF3_TARGETS_DN	0.0314944	0.183585	0.0315511	0.0231766	-0.0912366	0.85595	0.0304624	0.152575	0.0409931	0.0342827	0.081641
KRASNOSELSKAYA_ILF3_TARGETS_UP	0.141007	0.138181	0.108595	0.120765	-0.0512326	0.897634	0.126107	-0.0381698	0.903565	0.562013	0.0162596
KRIEG_HYPOXIA_NOT_VIA_KDM3A	0.102357	-0.0385336	0.0230571	0.10033	-0.0427239	0.643123	0.105761	0.00622242	0.953788	0.202617	-0.0250117
KRIEG_HYPOXIA_VIA_KDM3A	0.133548	0.0508465	0.0564022	0.118975	0.0427598	0.96293	0.142297	0.0957606	0.00914708	0.0186511	0.0631223
KRIEG_KDM3A_TARGETS_NOT_HYPOXIA	0.101862	0.0347605	0.028307	0.0975464	-0.0193605	0.881209	0.0976774	-0.00561091	0.954016	0.279028	0.00326303
KRIGE_AMINO_ACID_DEPRIVATION	0.129196	0.0238932	0.7034	0.113759	-0.107744	0.969924	0.111096	-0.0441649	0.893505	0.985991	-0.0426719
KRIGE_RESPONSE_TO_TOSEDOSTAT_24HR_DN	0.131927	-0.0187522	0.758689	0.12394	0.00145072	0.991867	0.130937	-0.0100103	0.543843	0.938221	-0.00910392
KRIGE_RESPONSE_TO_TOSEDOSTAT_24HR_UP	0.0692282	-0.0463005	0.527439	0.0740114	-0.0227938	0.969924	0.0699219	-0.00684318	0.977694	0.966726	-0.0253125
KRIGE_RESPONSE_TO_TOSEDOSTAT_6HR_DN	0.128218	-0.0201295	0.7862	0.123414	0.00285814	1	0.12781	-0.00712756	0.591124	0.957303	-0.00813297
KRIGE_RESPONSE_TO_TOSEDOSTAT_6HR_UP	0.0788137	-0.0218779	0.393494	0.0802711	-0.00276881	0.972385	0.0782596	-0.0251308	0.472007	0.754197	-0.0165925
KUMAR_AUTOPHAGY_NETWORK	0.078128	0.127002	0.00622536	0.0652072	-0.0862045	1	0.0754881	0.0918703	0.12091	0.025632	0.0442225
KUMAR_PATHOGEN_LOAD_BY_MACROPHAGES	0.0569935	0.0367955	0.059864	0.0566894	0.0100391	0.988839	0.0541082	-0.00508348	0.582854	0.346203	0.0139171
KUMAR_TARGETS_OF_MLL_AF9_FUSION	0.0821306	-0.0239868	0.373513	0.0833368	-0.0135745	0.969924	0.0856005	0.0207298	0.820644	0.876654	-0.00561049
KUNINGER_IGF1_VS_PDGFB_TARGETS_DN	0.0763501	0.139352	0.0374662	0.0743172	0.261168	0.761609	0.0805556	0.176419	0.0087135	0.0108755	0.192313
KUNINGER_IGF1_VS_PDGFB_TARGETS_UP	0.0260293	0.241373	6.40224e-07	0.0253879	0.285006	0.513941	0.0289908	0.390636	5.14852e-09	1.03915e-12	0.305672
KUROZUMI_RESPONSE_TO_ONCOCYTIC_VIRUS	0.0331905	0.171909	0.100322	0.0317468	0.154328	0.991867	0.0258766	0.0716282	0.828759	0.545004	0.132622
KUUSELO_PANCREATIC_CANCER_19Q13_AMPLIFICATION	0.0781479	-0.0885649	0.0180807	0.0769784	-0.0714212	0.577327	0.0715552	-0.154178	0.0381677	0.0157241	-0.104721
KYNG_DNA_DAMAGE_BY_4NQO	0.166794	0.0621046	0.595989	0.164384	0.0907374	0.612296	0.175772	0.0779667	0.10489	0.366928	0.0769362
KYNG_DNA_DAMAGE_BY_4NQO_OR_UV	0.0855365	-0.0508226	0.0161165	0.0838904	-0.043784	0.969924	0.0830955	-0.048406	0.231857	0.0812313	-0.0476709
KYNG_DNA_DAMAGE_BY_GAMMA_AND_UV_RADIATION	0.0792589	-0.0422025	0.280055	0.0696115	-0.124533	0.542577	0.0829876	-0.011005	0.43641	0.490355	-0.0592468
KYNG_DNA_DAMAGE_BY_GAMMA_RADIATION	0.101421	-0.0284051	0.218433	0.0970622	0.00563126	0.982217	0.106137	0.0170183	0.850953	0.75706	-0.00191852
KYNG_DNA_DAMAGE_BY_UV	0.0632605	0.00116276	0.966865	0.0704211	0.00418249	0.991012	0.0615277	-0.0496264	0.500488	0.961476	-0.0147604
KYNG_DNA_DAMAGE_DN	0.174503	-0.0304291	0.174497	0.174106	-0.0132679	1	0.175723	-0.0227763	0.702998	0.650104	-0.0221578
KYNG_DNA_DAMAGE_UP	0.0626499	-0.0451279	0.0530756	0.0590513	-0.0389482	0.826428	0.0627788	-0.0391454	0.60654	0.298054	-0.0410738
KYNG_ENVIRONMENTAL_STRESS_RESPONSE_NOT_BY_4NQO_IN_WS	0.136849	-0.0994853	0.000516083	0.134077	-0.116882	0.513941	0.138189	-0.0233074	0.462382	0.00620102	-0.0798916
KYNG_ENVIRONMENTAL_STRESS_RESPONSE_NOT_BY_GAMMA_IN_OLD	0.0829697	-0.05436	0.360255	0.0838127	-0.0931627	0.598862	0.0839242	-0.0116732	0.983265	0.796056	-0.0530653
KYNG_ENVIRONMENTAL_STRESS_RESPONSE_NOT_BY_GAMMA_IN_WS	0.149242	-0.106547	0.00576124	0.156385	-0.0409624	0.826428	0.149242	-0.033411	0.906852	0.0918348	-0.0603069
KYNG_ENVIRONMENTAL_STRESS_RESPONSE_NOT_BY_UV_IN_OLD	0.153399	-0.102721	0.0314172	0.15521	-0.0788803	0.951371	0.171332	0.03231	0.721133	0.262944	-0.0497637
KYNG_ENVIRONMENTAL_STRESS_RESPONSE_UP	0.240273	-0.0159152	0.190922	0.245813	0.0144005	0.969924	0.239762	0.0102226	0.900724	0.733034	0.00290262
KYNG_RESPONSE_TO_H2O2	0.174117	-0.0415108	0.197022	0.172569	-0.0602251	0.92401	0.17684	-0.000938888	0.693103	0.657724	-0.0342249
KYNG_RESPONSE_TO_H2O2_VIA_ERCC6_DN	0.219298	-0.0238616	0.0335833	0.20532	-0.0284429	0.808624	0.227429	0.0123211	0.770805	0.25833	-0.0133278
KYNG_RESPONSE_TO_H2O2_VIA_ERCC6_UP	0.078238	0.0863267	0.119325	0.0716924	0.0851542	0.950047	0.07818	0.0741321	0.532641	0.467774	0.081871
KYNG_WERNER_SYNDROM_AND_NORMAL_AGING_DN	0.116611	-0.0194107	0.0299856	0.11627	0.00934471	0.969924	0.11656	-0.0232337	0.441585	0.190561	-0.0110999
KYNG_WERNER_SYNDROM_AND_NORMAL_AGING_UP	0.0702008	-0.0114333	0.699681	0.07086	0.020429	0.913711	0.0762945	0.0323307	0.505838	0.894526	0.0137755
LA_MEN1_TARGETS	0.062355	0.17665	0.0709431	0.0624303	-0.0124789	0.980188	0.0557112	0.0443697	0.84838	0.462259	0.0695138
LAIHO_COLORECTAL_CANCER_SERRATED_DN	0.0662488	-0.052946	0.0197942	0.0657128	-0.000326833	0.967933	0.069023	-0.0661945	0.300892	0.112116	-0.0398224
LAIHO_COLORECTAL_CANCER_SERRATED_UP	0.282531	0.0255714	0.184046	0.282943	0.0208802	0.829883	0.286494	0.0437248	0.059701	0.152557	0.0300588
LANDIS_BREAST_CANCER_PROGRESSION_DN	0.0779462	-0.0798674	0.0103525	0.0697079	-0.151202	0.569709	0.0837924	0.0225628	0.98637	0.112814	-0.0695021
LANDIS_BREAST_CANCER_PROGRESSION_UP	0.113422	0.190657	2.4322e-05	0.136046	0.345249	0.513941	0.126924	0.263287	2.66726e-06	1.05395e-08	0.266398
LANDIS_ERBB2_BREAST_PRENEOPLASTIC_DN	0.0793527	0.00440801	0.657628	0.0790597	0.00675846	0.916873	0.0781041	0.0169264	0.87228	0.972473	0.0093643
LANDIS_ERBB2_BREAST_TUMORS_324_DN	0.0857378	-0.0475739	0.0239157	0.0839538	-0.0362857	0.623079	0.0878287	-0.0135841	0.941595	0.201597	-0.0324812
LANDIS_ERBB2_BREAST_TUMORS_324_UP	0.148981	0.0756403	0.0421572	0.152276	0.0337329	0.724529	0.156668	0.098243	0.0115817	0.0143353	0.0692054
LANDIS_ERBB2_BREAST_TUMORS_65_DN	0.0536853	-0.196541	0.000970843	0.0546234	-0.0940824	0.86275	0.0566068	-0.0704327	0.770805	0.0228047	-0.120352
LANDIS_ERBB2_BREAST_TUMORS_65_UP	0.146221	0.126774	0.00258692	0.154795	0.0589705	0.887941	0.15064	0.123752	0.0589657	0.00671457	0.103165
LANG_MYB_FAMILY_TARGETS	0.181889	-0.0462335	0.0564633	0.186811	0.050214	0.988548	0.192775	0.00239816	0.847115	0.411729	0.00212623
LASTOWSKA_COAMPLIFIED_WITH_MYCN	0.0863167	-0.0668076	0.153062	0.0888946	0.0516659	0.944788	0.0821583	-0.0576808	0.333553	0.416134	-0.0242742
LASTOWSKA_NEUROBLASTOMA_COPY_NUMBER_DN	0.0790299	-0.0444582	6.51543e-05	0.0781466	-0.021553	0.748267	0.0788584	-0.0626217	8.44039e-05	8.5064e-07	-0.0428776
LASTOWSKA_NEUROBLASTOMA_COPY_NUMBER_UP	0.0830298	-0.0394795	0.10162	0.0767721	-0.0367212	0.922999	0.0850589	0.0150289	0.751928	0.505517	-0.0203906
LAU_APOPTOSIS_CDKN2A_UP	0.106976	-0.124543	0.00524842	0.114678	-0.0739685	0.887736	0.108836	-0.00362667	0.570031	0.0651204	-0.0673792
LE_EGR2_TARGETS_DN	0.076213	0.128188	0.00099015	0.0694974	0.0660704	0.808624	0.086918	0.255343	3.09983e-06	5.38862e-07	0.149867
LE_EGR2_TARGETS_UP	0.121788	-0.0178377	0.520651	0.0984883	-0.111055	0.864725	0.113355	-0.0501205	0.609308	0.858618	-0.0596712
LEE_AGING_CEREBELLUM_DN	0.0459737	-0.00017777	0.87302	0.0464552	-0.0616498	0.950047	0.0447557	-0.0747309	0.392457	0.895871	-0.0455195
LEE_AGING_CEREBELLUM_UP	0.113458	-0.00214582	0.471288	0.11291	-0.0449745	0.516248	0.107745	-0.0288849	0.621554	0.706693	-0.0253351
LEE_AGING_MUSCLE_DN	0.122057	0.0286727	0.395154	0.118373	-0.029174	0.898194	0.106931	-0.0732121	0.152579	0.442289	-0.0245711
LEE_AGING_MUSCLE_UP	0.210046	-0.0609496	0.00288842	0.21288	-0.0760928	0.754256	0.207591	-0.0413488	0.179151	0.0154749	-0.0594638
LEE_AGING_NEOCORTEX_DN	0.0864865	-0.0105009	0.854803	0.0823973	0.00461663	0.969924	0.0942904	0.0919284	0.0767744	0.480416	0.0286814
LEE_AGING_NEOCORTEX_UP	0.192027	-0.0748273	0.00570899	0.193105	-0.0790924	0.760904	0.191781	-0.0445508	0.609308	0.0649609	-0.0661568
LEE_BMP2_TARGETS_DN	0.107085	0.0261061	0.957409	0.0923302	0.0250803	0.898194	0.10222	-0.0335916	0.661765	0.980315	0.00586495
LEE_BMP2_TARGETS_UP	0.0744853	-0.0123319	0.952669	0.0807992	-0.0414725	0.999371	0.0756126	0.0137356	0.823577	0.998	-0.0133563
LEE_CALORIE_RESTRICTION_MUSCLE_DN	0.0968208	0.0645371	0.0440544	0.0922118	0.109143	0.643123	0.0965774	0.0826903	0.0595614	0.0468546	0.085457
LEE_CALORIE_RESTRICTION_MUSCLE_UP	0.179722	0.0469885	0.229817	0.155622	-0.05822	0.982217	0.17976	0.0502593	0.224612	0.427281	0.0130092
LEE_CALORIE_RESTRICTION_NEOCORTEX_DN	0.137248	0.00396374	0.745163	0.127933	-0.0200496	0.975393	0.145262	0.0489141	0.344849	0.837419	0.0109428
LEE_CALORIE_RESTRICTION_NEOCORTEX_UP	0.054253	-0.0576362	0.132881	0.0515737	-0.0786569	0.993525	0.0553879	-0.00820492	0.837997	0.622301	-0.048166
LEE_DIFFERENTIATING_T_LYMPHOCYTE	0.0484957	-0.0579113	0.0120554	0.0470978	-0.0115657	0.986527	0.0508808	-0.0110424	0.502094	0.114842	-0.0268398
LEE_DOUBLE_POLAR_THYMOCYTE	0	NA	0.105605	0	NA	0.955046	0	NA	0.430508	0.393241	NA
LEE_EARLY_T_LYMPHOCYTE_DN	0.0772186	0.0156771	0.755619	0.0687392	-0.088925	0.765197	0.0760145	0.0235264	0.452073	0.847392	-0.0165739
LEE_EARLY_T_LYMPHOCYTE_UP	0.0433009	0.476619	0.890472	0.025203	0.020005	0.96293	0.026252	-0.0633102	0.431432	0.920722	0.144438
LEE_LIVER_CANCER_ACOX1_DN	0.0146901	-0.116281	0.0863911	0.0178947	-0.131574	0.85333	0.0138951	-0.120268	0.128067	0.15609	-0.122708
LEE_LIVER_CANCER_ACOX1_UP	0.203697	0.0383599	0.175954	0.234494	0.152659	0.815225	0.19891	0.0390057	0.825209	0.640475	0.076675
LEE_LIVER_CANCER_CIPROFIBRATE_DN	0.00313119	-0.046223	0.931962	0.00626966	0.379182	0.868792	0.00129617	0.190331	0.853931	0.993633	0.17443
LEE_LIVER_CANCER_CIPROFIBRATE_UP	0.0843445	0.0445808	0.526096	0.110814	0.195104	0.760982	0.0935929	0.142463	0.139455	0.449341	0.127383
LEE_LIVER_CANCER_DENA_DN	0.0118175	-0.067609	0.393683	0.0148181	-0.302194	0.681759	0.00879149	-0.39927	0.145648	0.371238	-0.256358
LEE_LIVER_CANCER_DENA_UP	0.167697	0.0153775	0.458063	0.17522	-0.0493378	0.972385	0.163899	0.00143798	0.883921	0.931748	-0.0108408
LEE_LIVER_CANCER_E2F1_DN	0.0306121	-0.0549849	0.995296	0.0306121	-0.14599	0.870922	0.0316194	0.00864371	0.770519	0.991879	-0.0641105
LEE_LIVER_CANCER_E2F1_UP	0.181717	0.0252922	0.0209227	0.188939	-0.0108625	0.96293	0.167212	-0.0385265	0.795741	0.219232	-0.00803227
LEE_LIVER_CANCER_MYC_DN	0.0411712	0.0843699	0.458773	0.0402199	0.059506	0.908558	0.0370752	0.0160272	0.894814	0.922213	0.053301
LEE_LIVER_CANCER_MYC_E2F1_DN	0.00669331	0.280987	0.330248	0.00550878	-0.18562	0.969924	0.00639361	0.368563	0.715501	0.815538	0.154643
LEE_LIVER_CANCER_MYC_E2F1_UP	0.204165	0.0560682	0.00239601	0.208366	0.0677068	0.760982	0.186037	-0.0228722	0.618099	0.034743	0.0336343
LEE_LIVER_CANCER_MYC_TGFA_DN	0.0134507	0.00710339	0.97013	0.0142699	-0.203955	0.865604	0.0120369	-0.040598	0.75032	0.988336	-0.0791499
LEE_LIVER_CANCER_MYC_TGFA_UP	0.204812	0.0600316	0.0148718	0.209954	0.0391175	0.718187	0.208263	0.0754906	0.0209124	0.00999387	0.0582132
LEE_LIVER_CANCER_MYC_UP	0.263457	0.033319	0.00938675	0.268044	0.0448204	0.310931	0.257835	-0.00419063	0.82704	0.0607949	0.0246496
LEE_LIVER_CANCER_SURVIVAL_DN	0.248824	-0.0448236	0.395521	0.237647	0.02059	0.969924	0.244448	-0.0289599	0.796682	0.88264	-0.0177312
LEE_LIVER_CANCER_SURVIVAL_UP	0.018702	0.0444563	0.789771	0.0202884	0.0392329	0.85348	0.0186504	0.0565676	0.770805	0.97113	0.0467522
LEE_METASTASIS_AND_ALTERNATIVE_SPLICING_DN	0.066344	0.00319269	0.497505	0.0634475	-0.0727495	0.969924	0.0683239	0.0641127	0.58445	0.864921	-0.00181469
LEE_METASTASIS_AND_ALTERNATIVE_SPLICING_UP	0.0591343	-0.00970484	0.765087	0.0692491	0.11118	0.887941	0.0629576	0.0130562	0.739362	0.967233	0.0381771
LEE_NEURAL_CREST_STEM_CELL_DN	0.0625118	-0.034251	0.239076	0.0658787	0.0375029	0.96293	0.0652011	0.0282508	0.607699	0.685656	0.0105009
LEE_NEURAL_CREST_STEM_CELL_UP	0.0918188	0.0171738	0.275507	0.0938835	0.0239943	0.951049	0.0949529	0.0759723	0.054603	0.204098	0.0390468
LEE_RECENT_THYMIC_EMIGRANT	0.100845	-0.0314922	0.0979746	0.0985759	-0.0542467	0.805255	0.102625	-0.00881057	0.651668	0.430429	-0.0315165
LEE_TARGETS_OF_PTCH1_AND_SUFU_DN	0.0049529	-0.0342835	0.411388	0.0043127	-0.079138	0.85333	0.00860554	0.268035	0.0697968	0.283914	0.0515379
LEE_TARGETS_OF_PTCH1_AND_SUFU_UP	0.104232	-0.0342535	0.292554	0.10773	-0.0680677	0.938843	0.104036	-0.00464886	0.806876	0.807138	-0.0356567
LEI_MYB_TARGETS	0.188948	0.00941154	0.325135	0.183532	-0.025324	0.983098	0.192196	0.038887	0.0693353	0.267388	0.00765817
LEIN_ASTROCYTE_MARKERS	0.0961822	-0.0258488	0.935634	0.100229	0.00679226	0.885659	0.0972528	0.114717	0.462382	0.927027	0.0318869
LEIN_CEREBELLUM_MARKERS	0.0312276	0.0533904	0.445723	0.0299119	0.00625537	0.903127	0.03005	-0.042045	0.912421	0.919404	0.00586691
LEIN_CHOROID_PLEXUS_MARKERS	0.0437533	0.0111007	0.934102	0.0512015	0.101971	0.623079	0.0430513	-0.0388077	0.693103	0.935848	0.0247546
LEIN_LOCALIZED_TO_PROXIMAL_DENDRITES	0.09488	-0.0487619	0.159582	0.0983546	0.0984791	0.748267	0.0962586	-0.0519694	0.68521	0.542986	-0.000750703
LEIN_MEDULLA_MARKERS	0.0798621	0.0170346	0.402935	0.0773986	-0.0163673	0.946308	0.0821582	0.0793594	0.032619	0.186689	0.0266756
LEIN_MIDBRAIN_MARKERS	0.0207618	-0.119399	0.18266	0.0286067	0.0279298	0.969924	0.0257737	0.046949	0.984098	0.744849	-0.01484
LEIN_NEURON_MARKERS	0.0360274	-0.044091	0.495064	0.0335712	-0.060314	0.96293	0.0401427	0.0892673	0.801889	0.92662	-0.00504587
LEIN_OLIGODENDROCYTE_MARKERS	0.0772454	-0.00180974	0.995296	0.0712288	-0.0166479	0.969924	0.0794448	0.0472872	0.197554	0.76853	0.00960986
LEIN_PONS_MARKERS	0.0797308	0.027632	0.118715	0.0847848	0.0686488	0.868792	0.0781277	-0.00625827	0.997735	0.602958	0.0300075
LENAOUR_DENDRITIC_CELL_MATURATION_DN	0.0908487	-0.062085	0.0789867	0.0900895	-0.0487298	0.909959	0.0992029	0.0828236	0.281851	0.253247	-0.00933042
LENAOUR_DENDRITIC_CELL_MATURATION_UP	0.0773276	0.0395497	0.161863	0.0769608	0.00883055	0.995918	0.0723228	0.00493183	0.952833	0.710894	0.0177707
LEONARD_HYPOXIA	0.108604	-0.0992825	0.0542358	0.121308	-0.145422	0.450607	0.126972	0.0484126	0.994626	0.282574	-0.0654305
LI_AMPLIFIED_IN_LUNG_CANCER	0.378011	0.0164642	0.165927	0.375756	-0.00583885	0.969924	0.374175	0.0194439	0.160838	0.293282	0.0100231
LI_CISPLATIN_RESISTANCE_DN	0.020153	-0.3733	0.00845128	0.0231602	0.11744	0.951832	0.0273011	0.0268729	0.760546	0.116754	-0.0763291
LI_CISPLATIN_RESISTANCE_UP	0.0146897	-0.73418	0.0062463	0.0201688	-0.438496	0.881209	0.0216015	-0.452917	0.752489	0.0892086	-0.541864
LI_DCP2_BOUND_MRNA	0.216057	0.00126574	0.681364	0.193193	-0.0680395	0.92906	0.21254	-0.00947495	0.742655	0.958859	-0.0254162
LI_INDUCED_T_TO_NATURAL_KILLER_DN	0.0365721	-0.146807	0.0162251	0.0407323	0.0172047	0.936246	0.0380234	-0.0768907	0.452868	0.126412	-0.0688309
LI_INDUCED_T_TO_NATURAL_KILLER_UP	0.131211	0.0149038	0.538607	0.128691	-0.0263974	0.791716	0.136498	0.0611879	0.054603	0.27542	0.0165648
LI_LUNG_CANCER	0.336684	-0.0121609	0.491384	0.315492	-0.0543222	0.962255	0.33982	0.0264891	0.361008	0.739211	-0.0133313
LI_PROSTATE_CANCER_EPIGENETIC	0.0677778	0.319425	0.00162793	0.0540362	0.0483834	0.980188	0.0670268	0.534353	2.55111e-07	1.04365e-07	0.300721
LI_WILMS_TUMOR	0.0325125	-0.146684	0.0226805	0.0358976	0.133838	0.972385	0.0400857	0.00624667	0.952856	0.258943	-0.00219959
LI_WILMS_TUMOR_VS_FETAL_KIDNEY_1_DN	0.0787532	0.123311	0.884513	0.0549064	-0.0385276	0.969924	0.0718859	0.0687778	0.920774	0.998167	0.0511872
LI_WILMS_TUMOR_VS_FETAL_KIDNEY_1_UP	0.0945882	0.149078	9.63012e-07	0.0932579	0.0908661	0.748267	0.0984408	0.138897	0.000200238	4.04558e-08	0.12628
LI_WILMS_TUMOR_VS_FETAL_KIDNEY_2_DN	0.0613988	0.175306	0.253448	0.0657552	0.0717274	0.932119	0.0679037	0.266767	0.0185654	0.0928429	0.171267
LI_WILMS_TUMOR_VS_FETAL_KIDNEY_2_UP	0.0961915	0.0207094	0.987366	0.0802073	0.0975241	0.845484	0.0850282	-0.112564	0.469667	0.931036	0.00188978
LIAN_LIPA_TARGETS_3M	0.017473	-0.118844	0.532067	0.0220759	0.044019	0.969924	0.0177791	0.10921	0.444739	0.815894	0.0114618
LIAN_LIPA_TARGETS_6M	0.021474	-0.00237285	0.897791	0.0250751	0.0775506	0.961421	0.0221014	0.159973	0.35556	0.883533	0.0783835
LIAN_NEUTROPHIL_GRANULE_CONSTITUENTS	0.0811789	0.122643	0.0462506	0.101484	0.12623	0.887941	0.0872677	0.190943	0.015535	0.0225984	0.146605
LIANG_HEMATOPOIESIS_STEM_CELL_NUMBER_LARGE_VS_TINY_DN	0.112296	0.0422219	0.446911	0.112437	0.0652836	0.887639	0.106532	0.0374836	0.674959	0.85302	0.0483297
LIANG_HEMATOPOIESIS_STEM_CELL_NUMBER_LARGE_VS_TINY_UP	0.114221	0.00419529	0.952669	0.117214	0.0163161	0.918473	0.109824	-0.048228	0.213265	0.762821	-0.00923887
LIANG_HEMATOPOIESIS_STEM_CELL_NUMBER_SMALL_VS_HUGE_DN	0.140857	-0.0206306	0.557244	0.132989	-0.0749851	0.934993	0.137327	0.0333531	0.399289	0.791072	-0.0207542
LIANG_HEMATOPOIESIS_STEM_CELL_NUMBER_SMALL_VS_HUGE_UP	0.122807	0.0832818	0.0040456	0.116888	0.0406387	0.92906	0.128416	0.0959456	0.00711604	0.00179094	0.0732887
LIANG_SILENCED_BY_METHYLATION_2	0.0934111	0.0509101	0.867976	0.0922318	0.0130491	0.969924	0.0893252	0.023802	0.583977	0.964628	0.0292537
LIANG_SILENCED_BY_METHYLATION_UP	0.173888	0.306138	3.75266e-12	0.156326	0.18308	0.511056	0.177585	0.281265	5.64367e-09	1.19461e-17	0.256828
LIAO_HAVE_SOX4_BINDING_SITES	0.0371882	0.0973338	0.586425	0.0306886	-0.283738	0.77435	0.0443207	0.307343	0.00128386	0.0210921	0.0403127
LIAO_METASTASIS	0.0647428	0.00599751	0.400885	0.0628202	-0.0473938	0.864349	0.0682993	0.0564177	0.0367873	0.189649	0.00500714
LIEN_BREAST_CARCINOMA_METAPLASTIC	0.0693358	0.0107682	0.927977	0.0695263	0.00116337	0.93007	0.0707032	0.0223571	0.640551	0.977603	0.0114295
LIEN_BREAST_CARCINOMA_METAPLASTIC_VS_DUCTAL_DN	0.0734004	0.103879	6.8833e-05	0.0722883	0.0515482	0.826428	0.0792329	0.127168	4.30048e-05	5.31877e-07	0.0941986
LIEN_BREAST_CARCINOMA_METAPLASTIC_VS_DUCTAL_UP	0.0915528	0.0318611	0.425559	0.0869303	0.0509926	0.942489	0.0944993	0.0500442	0.234704	0.579401	0.0442993
LIM_MAMMARY_LUMINAL_MATURE_DN	0.066591	-0.0112641	0.640782	0.067611	0.0758409	0.820496	0.0614631	-0.0685801	0.330161	0.74368	-0.00133442
LIM_MAMMARY_LUMINAL_MATURE_UP	0.00968238	0.120477	0.401762	0.0126125	0.0471444	0.972385	0.011664	0.268628	0.0347601	0.197457	0.145416
LIM_MAMMARY_LUMINAL_PROGENITOR_UP	0.0117029	-0.00861313	0.884513	0.0150475	0.476173	0.471483	0.00798879	0.091423	0.519439	0.801381	0.186327
LIM_MAMMARY_STEM_CELL_DN	0.0471677	0.0806721	0.00610675	0.0505319	0.022346	0.866439	0.0467096	0.0433393	0.122359	0.0228531	0.0487858
LIM_MAMMARY_STEM_CELL_UP	0.0457337	0.00447042	0.686575	0.0438741	-0.0379859	0.991867	0.0488815	0.0522686	0.159678	0.617677	0.00625103
LIN_APC_TARGETS	0.171416	0.060245	0.0105514	0.163129	0.0519218	0.901073	0.166872	0.0513177	0.0902193	0.0282989	0.0544948
LIN_MELANOMA_COPY_NUMBER_DN	0.14392	0.0261173	0.487405	0.151193	0.0857908	0.689164	0.140784	0.00568749	0.817369	0.858814	0.0391985
LIN_MELANOMA_COPY_NUMBER_UP	0.0821705	0.0257869	0.897779	0.0827003	0.0184085	0.995918	0.0862029	0.0639352	0.00650767	0.112828	0.0360435
LIN_NPAS4_TARGETS_DN	0.063801	-0.0452309	0.104588	0.0613154	-0.0876386	0.868508	0.0634744	-0.0285799	0.472151	0.390616	-0.0538165
LIN_NPAS4_TARGETS_UP	0.0386493	-0.0387115	0.044954	0.0416624	0.0509249	0.899038	0.0382651	-0.0572456	0.677013	0.302993	-0.0150107
LIN_SILENCED_BY_TUMOR_MICROENVIRONMENT	0.0504323	0.080576	0.0444239	0.0526258	-0.00326156	0.928654	0.0488243	-0.0293223	0.887669	0.357992	0.0159974
LINDGREN_BLADDER_CANCER_CLUSTER_1_DN	0.0812417	0.0509723	0.190126	0.0783031	0.0574971	0.922999	0.0818901	0.0659303	0.363852	0.481166	0.0581332
LINDGREN_BLADDER_CANCER_CLUSTER_1_UP	0.105667	-0.0186099	0.875828	0.110252	0.057719	0.748267	0.110443	0.00506111	0.693103	0.954124	0.0147234
LINDGREN_BLADDER_CANCER_CLUSTER_2A_DN	0.0951226	-0.0402479	0.119325	0.0986489	0.0115734	0.969924	0.0924315	-0.070197	0.740893	0.55506	-0.0329572
LINDGREN_BLADDER_CANCER_CLUSTER_2B	0.077367	-0.0409051	0.196301	0.0772038	-0.0413682	0.990178	0.0776998	-0.000284607	0.688661	0.673704	-0.0275193
LINDGREN_BLADDER_CANCER_CLUSTER_3_DN	0.0884921	0.0238536	0.174446	0.0876642	-0.0112169	0.969924	0.0915308	0.0495579	0.156629	0.297374	0.0207315
LINDGREN_BLADDER_CANCER_CLUSTER_3_UP	0.0807287	0.167179	0.433066	0.0658992	0.037794	0.950047	0.0693826	0.0277991	0.738029	0.881243	0.0775907
LINDGREN_BLADDER_CANCER_HIGH_RECURRENCE	0.112948	-0.0612389	0.324102	0.120776	-0.0421881	0.785972	0.107306	-0.0885914	0.173865	0.397493	-0.0640061
LINDGREN_BLADDER_CANCER_WITH_LOH_IN_CHR9Q	0.064013	0.0128361	0.303204	0.0654939	0.062308	0.513941	0.0642265	-0.0206794	0.425901	0.490557	0.0181549
LINDSTEDT_DENDRITIC_CELL_MATURATION_A	0.0448444	-0.0926045	0.0421906	0.0515102	0.100567	0.950047	0.0379076	-0.241801	0.0156098	0.0222646	-0.0779462
LINDSTEDT_DENDRITIC_CELL_MATURATION_B	0.118257	-0.204104	0.000107456	0.113983	-0.144166	0.670744	0.126587	-0.030709	0.857328	0.00356273	-0.126326
LINDSTEDT_DENDRITIC_CELL_MATURATION_C	0.109246	0.010286	0.606396	0.102111	-0.0378783	0.733064	0.111412	0.0137629	0.608433	0.855356	-0.00460976
LINDSTEDT_DENDRITIC_CELL_MATURATION_D	0.0649194	0.00638548	0.711204	0.0634642	-0.0497947	0.949251	0.0691334	0.0318443	0.75735	0.969314	-0.00385497
LINDVALL_IMMORTALIZED_BY_TERT_DN	0.0628071	-0.0731557	0.188144	0.0635852	-0.00205417	0.969924	0.0655304	-0.0202724	0.705575	0.663193	-0.0318274
LINDVALL_IMMORTALIZED_BY_TERT_UP	0.143313	-0.0103796	0.792928	0.146298	0.0130785	0.972385	0.13457	-0.0664736	0.155905	0.64463	-0.0212582
LINSLEY_MIR16_TARGETS	0.0553103	-0.036603	0.139221	0.0519527	-0.094969	0.573548	0.055564	-0.00824837	0.991875	0.534672	-0.0466068
LIU_BREAST_CANCER	0.207554	-0.0196571	0.82249	0.188391	-0.0220962	0.969924	0.216156	0.0490899	0.0915963	0.51434	0.00244552
LIU_CDX2_TARGETS_UP	0.00922877	-1.04883	0.0154672	0.00944541	-0.927624	0.826428	0.015078	-0.135744	0.374137	0.0985927	-0.704067
LIU_CMYB_TARGETS_UP	0.0562616	0.0333684	0.362745	0.0579418	0.0115499	0.958906	0.0552719	0.0298849	0.385065	0.673872	0.0249344
LIU_COMMON_CANCER_GENES	0.128835	-0.0240455	0.721875	0.12806	0.0497749	0.689164	0.127593	-0.0354509	0.36344	0.754497	-0.00324047
LIU_LIVER_CANCER	0.0083404	-0.0757778	0.993101	0.012517	-0.0380063	0.92906	0.00501195	-0.734744	0.442406	0.937795	-0.282843
LIU_NASOPHARYNGEAL_CARCINOMA	0.153298	0.00148349	0.642679	0.153965	0.035218	0.92906	0.147846	-0.0385308	0.471096	0.86433	-0.000609771
LIU_PROSTATE_CANCER_DN	0.0573337	0.00950483	0.518854	0.0588681	0.0267764	0.954779	0.0610258	0.0859662	0.014384	0.129444	0.0407491
LIU_PROSTATE_CANCER_UP	0.0991838	0.00254982	0.912576	0.0964181	-0.0470069	0.721159	0.103204	0.0500527	0.0987795	0.485516	0.00186524
LIU_SMARCA4_TARGETS	0.137555	0.0567606	0.377984	0.138253	0.00627961	0.969924	0.137912	0.0722325	0.160838	0.462144	0.0450909
LIU_SOX4_TARGETS_DN	0.0999828	-0.0413088	0.000410478	0.0950421	-0.0341543	0.643123	0.102472	-0.0193376	0.693103	0.00853365	-0.0316002
LIU_SOX4_TARGETS_UP	0.065713	-0.085452	0.147222	0.0663516	-0.054203	0.972385	0.0714628	0.0341202	0.964146	0.682	-0.0351783
LIU_TARGETS_OF_VMYB_VS_CMYB_DN	0.0662587	-0.0986512	0.00386827	0.0602641	-0.158746	0.794976	0.0694783	0.0216434	0.381602	0.035808	-0.0785846
LIU_VAV3_PROSTATE_CARCINOGENESIS_UP	0.123695	0.039484	0.480403	0.116742	-0.00927909	0.887941	0.106909	-0.123949	0.258718	0.621643	-0.0312481
LIU_VMYB_TARGETS_UP	0.0515698	0.0755971	0.00862586	0.0489218	-0.00315619	1	0.0534862	0.076297	0.10056	0.0285391	0.0495793
LOCKWOOD_AMPLIFIED_IN_LUNG_CANCER	0.117291	0.0277349	0.0317448	0.117359	0.0429017	0.92292	0.121454	0.0646108	2.99741e-05	9.85163e-05	0.0450824
LOPES_METHYLATED_IN_COLON_CANCER_DN	0.0580445	0.0315733	0.727647	0.063937	-0.0603139	0.948413	0.0443096	-0.0580658	0.760546	0.972247	-0.0289355
LOPES_METHYLATED_IN_COLON_CANCER_UP	0	#NAME?	0.038146	0	#NAME?	0.594192	0	#NAME?	0.0702667	0.0449041	#NAME?
LOPEZ_MBD_TARGETS	0.217086	-0.00605148	0.357486	0.219549	-0.00193235	0.982904	0.214185	-0.00165782	0.445951	0.71627	-0.00321388
LOPEZ_TRANSLATION_VIA_FN1_SIGNALING	0.197117	-0.0167142	0.105647	0.190026	0.00456689	0.969924	0.193177	-0.047524	0.233069	0.279623	-0.0198904
LU_AGING_BRAIN_DN	0.101239	-0.054917	0.0178515	0.0963016	-0.00861504	0.85333	0.10262	-0.0228679	0.608636	0.154239	-0.0288
LU_AGING_BRAIN_UP	0.103537	-0.0531967	0.132406	0.107331	0.0412151	0.942489	0.108392	-0.0129135	0.98637	0.651026	-0.00829833
LU_EZH2_TARGETS_DN	0.0548792	0.0571982	0.164524	0.053171	0.0182118	0.928507	0.0543806	0.0030924	0.718456	0.620161	0.0261675
LU_EZH2_TARGETS_UP	0.118867	-0.000594941	0.925668	0.115265	-0.0425712	0.781955	0.11617	-0.0181328	0.526737	0.926155	-0.020433
LU_IL4_SIGNALING	0.100606	-0.0456126	0.0582277	0.0993699	-0.0429304	0.901015	0.109124	0.0632544	0.779444	0.380572	-0.00842953
LU_TUMOR_ANGIOGENESIS_UP	0.0989457	0.176045	0.000277703	0.0734258	-0.0687128	0.969924	0.107568	0.297773	0.000898739	3.20198e-05	0.135035
LU_TUMOR_VASCULATURE_UP	0.102484	0.1092	0.0261438	0.0856346	-0.131587	0.7518	0.0952	0.0649209	0.575804	0.175679	0.014178
LUCAS_HNF4A_TARGETS_UP	0.0433909	-0.00438643	0.435513	0.0421357	-0.112237	0.692147	0.046747	0.0508373	0.320321	0.586088	-0.0219288
LUI_TARGETS_OF_PAX8_PPARG_FUSION	0.579598	-0.0223816	0.00445238	0.575247	-0.0428218	0.643123	0.562949	-0.0421088	0.00476742	0.00102303	-0.0357707
LUI_THYROID_CANCER_CLUSTER_1	0.134175	-0.0951339	0.0236917	0.122714	-0.0343455	0.969733	0.148724	0.0243625	0.75735	0.230683	-0.035039
LUI_THYROID_CANCER_CLUSTER_2	0.0357354	-0.0323511	0.453338	0.0392384	0.0340389	0.954779	0.0395957	0.0340532	0.585427	0.84003	0.0119136
LUI_THYROID_CANCER_CLUSTER_3	0.602426	-0.0113688	0.329832	0.597646	-0.0234803	0.788091	0.580387	-0.035461	0.144599	0.363235	-0.0234367
LUI_THYROID_CANCER_PAX8_PPARG_DN	0.489404	-0.00487233	0.566222	0.490458	-0.0108018	0.922999	0.46938	-0.0338028	0.0289712	0.211518	-0.0164923
LUI_THYROID_CANCER_PAX8_PPARG_UP	0.10752	-0.0508243	0.261224	0.102657	0.0470233	0.969924	0.119832	0.037442	0.75735	0.770139	0.0112137
LY_AGING_OLD_DN	0.173965	0.0268754	0.993783	0.141946	-0.00382605	1	0.156337	-0.068655	0.81607	0.998689	-0.0152019
LY_AGING_PREMATURE_DN	0.167785	0.0204767	0.957221	0.120814	-0.0942982	0.963657	0.140283	-0.152968	0.545547	0.967456	-0.0755964
MA_MYELOID_DIFFERENTIATION_DN	0.119053	-0.142048	0.000965339	0.120737	-0.0575347	0.793205	0.119984	-0.0738874	0.118653	0.00487063	-0.0911565
MA_MYELOID_DIFFERENTIATION_UP	0.241248	0.0113009	0.859039	0.231867	0.0352452	0.730816	0.240471	0.0232014	0.173865	0.618692	0.0232492
MACAEVA_PBMC_RESPONSE_TO_IR	0.0319197	-0.0112535	0.711204	0.0348859	0.127819	0.569709	0.0303783	-0.0547409	0.600381	0.830198	0.0206083
MADAN_DPPA4_TARGETS	0.0461325	0.0467172	0.234068	0.0435414	-0.022118	0.805255	0.0406597	-0.0543605	0.698204	0.669103	-0.00992045
MAGRANGEAS_MULTIPLE_MYELOMA_IGG_VS_IGA_DN	0.167465	0.0238165	0.357204	0.155368	-0.0450341	0.733064	0.168188	0.0172904	0.399912	0.607611	-0.00130906
MAGRANGEAS_MULTIPLE_MYELOMA_IGLL_VS_IGLK_DN	0.0445027	-0.17922	0.0390655	0.0323011	-0.488265	0.523103	0.0425406	-0.191386	0.212301	0.0921412	-0.28629
MAGRANGEAS_MULTIPLE_MYELOMA_IGLL_VS_IGLK_UP	0.0658954	-0.0310367	0.332829	0.0522822	-0.146935	0.723216	0.0756733	0.116901	0.0763417	0.238586	-0.020357
MAHAJAN_RESPONSE_TO_IL1A_DN	0.110436	-0.03004	0.189072	0.114033	-0.0188231	0.972385	0.117919	0.00981384	0.505838	0.576209	-0.0130164
MAHAJAN_RESPONSE_TO_IL1A_UP	0.0431736	-0.13246	0.0326824	0.0449909	-0.15661	0.733064	0.0476982	0.031451	0.770519	0.239259	-0.0858729
MALONEY_RESPONSE_TO_17AAG_DN	0.361404	-0.00850883	0.601262	0.34688	-0.0137769	0.96293	0.346823	-0.024319	0.464721	0.854151	-0.0155349
MALONEY_RESPONSE_TO_17AAG_UP	0.177811	0.020962	0.913097	0.176717	-0.00113579	0.961156	0.161109	-0.0230497	0.920186	0.998613	-0.0010745
MANALO_HYPOXIA_DN	0.0638958	-0.0121868	0.913272	0.0493833	-0.0888815	0.990178	0.0579199	-0.049328	0.751507	0.99279	-0.0501321
MANALO_HYPOXIA_UP	0.0612532	-0.0773113	0.0488481	0.0666576	0.00562488	0.976212	0.0667389	0.0187842	0.980506	0.409268	-0.0176341
MANNE_COVID19_COMBINED_COHORT_VS_HEALTHY_DONOR_PLATELETS_DN	0.0149125	0.0191319	0.534366	0.0168016	-0.0722786	0.928654	0.0143985	-0.0794877	0.770265	0.926604	-0.0442115
MANNE_COVID19_COMBINED_COHORT_VS_HEALTHY_DONOR_PLATELETS_UP	0.0535104	-0.0058695	0.764781	0.0551614	-0.0386379	0.669949	0.049321	-0.0755044	0.207557	0.611723	-0.040004
MANNE_COVID19_ICU_VS_HEALTHY_DONOR_PLATELETS_DN	0.0105922	0.183315	0.0413341	0.0149845	0.240145	0.935834	0.00944185	-0.105186	0.859999	0.339121	0.106092
MANNE_COVID19_ICU_VS_HEALTHY_DONOR_PLATELETS_UP	0.0522587	-0.0162238	0.676069	0.0518545	-0.098874	0.780267	0.0492969	-0.0905351	0.0668524	0.3505	-0.0685443
MANNE_COVID19_NONICU_VS_HEALTHY_DONOR_PLATELETS_DN	0.0235445	0.141217	0.00619879	0.0243639	0.0307995	0.969924	0.0239111	0.121007	0.134855	0.0271186	0.0976744
MANNE_COVID19_NONICU_VS_HEALTHY_DONOR_PLATELETS_UP	0.064909	0.0144471	0.752355	0.0675507	0.0317997	0.985067	0.0625011	-0.00454855	0.399289	0.875634	0.0138994
MARCHINI_TRABECTEDIN_RESISTANCE_DN	0.197486	0.0875949	0.0321808	0.189203	-0.0141961	0.991867	0.19121	0.0371775	0.384219	0.185012	0.0368588
MARIADASON_REGULATED_BY_HISTONE_ACETYLATION_DN	0.0444564	-0.0184372	0.782098	0.0419191	-0.12763	0.969924	0.0525864	0.150479	0.02224	0.226308	0.00147036
MARIADASON_REGULATED_BY_HISTONE_ACETYLATION_UP	0.0440648	-0.159166	0.00909956	0.0427898	-0.182026	0.450607	0.0467074	-0.0538733	0.939671	0.0848023	-0.131688
MARIADASON_RESPONSE_TO_BUTYRATE_SULINDAC_6	0.139938	-0.00847952	0.57542	0.122589	-0.00449672	0.972385	0.133075	-0.0809401	0.234704	0.668533	-0.0313055
MARKEY_RB1_ACUTE_LOF_DN	0.0734333	-0.00632829	0.782401	0.0751524	-0.0560836	0.928507	0.0739191	-0.0108474	0.860965	0.987835	-0.0244198
MARKEY_RB1_ACUTE_LOF_UP	0.119682	0.113625	0.741668	0.0914622	0.0136993	0.918473	0.101924	-0.0370912	0.694816	0.959759	0.0300778
MARKEY_RB1_CHRONIC_LOF_DN	0.0664763	0.00264371	0.764781	0.0732889	-0.0130893	0.955667	0.065347	-0.00635962	0.946789	0.993672	-0.00560173
MARKEY_RB1_CHRONIC_LOF_UP	0.0887984	-0.0295538	0.523111	0.0804232	-0.0173663	0.936688	0.0947521	0.0421518	0.795943	0.930122	-0.00158943
MARSHALL_VIRAL_INFECTION_RESPONSE_DN	0.0809253	-0.271886	0.00120399	0.0849676	-0.20314	0.669949	0.0766029	-0.203097	0.0159147	0.000971664	-0.226041
MARSON_BOUND_BY_E2F4_UNSTIMULATED	0.090171	0.207977	0.455085	0.0655629	-0.0764856	0.793322	0.0771004	0.0293778	0.806876	0.872169	0.0536231
MARSON_BOUND_BY_FOXP3_STIMULATED	0.116366	-0.0297771	0.069669	0.117353	-0.00638015	0.990718	0.121506	0.0109196	0.724876	0.424293	-0.00841256
MARSON_BOUND_BY_FOXP3_UNSTIMULATED	0.122307	-0.00871574	0.183442	0.118084	-0.0141241	0.900572	0.126163	0.0245103	0.216862	0.353621	0.000556801
MARSON_FOXP3_TARGETS_DN	0.0982092	-0.120882	0.00109766	0.100951	-0.0600169	0.718187	0.104876	-0.0088262	0.784393	0.0220648	-0.0632417
MARSON_FOXP3_TARGETS_STIMULATED_UP	0.082795	0.00505252	0.968137	0.0877041	0.0889635	0.990599	0.0891513	0.100875	0.287965	0.860154	0.0649635
MARSON_FOXP3_TARGETS_UP	0.191498	-0.00767546	0.893675	0.186621	-0.0382104	0.866782	0.199044	0.0606081	0.164847	0.660951	0.00490739
MARTENS_BOUND_BY_PML_RARA_FUSION	0.0860979	-0.0428572	0.020901	0.086929	-0.0322469	0.875045	0.0894623	0.0245454	0.439191	0.140256	-0.0168529
MARTENS_TRETINOIN_RESPONSE_DN	0.208772	-0.0154847	0.10254	0.198134	-0.0403102	0.748267	0.202387	-0.024581	0.282193	0.263662	-0.0267919
MARTENS_TRETINOIN_RESPONSE_UP	0.0149276	-0.0699583	0.399084	0.0177234	-0.0940241	0.901015	0.0164273	0.0715842	0.567365	0.78605	-0.0307994
MARTIN_INTERACT_WITH_HDAC	0.120635	-0.124336	1.20665e-08	0.101423	-0.245044	0.563573	0.129191	-0.0646091	0.237277	3.64942e-07	-0.144663
MARTIN_NFKB_TARGETS_UP	0.0678895	-0.115093	0.960648	0.0905542	-0.0418678	0.901015	0.0723074	0.0300408	0.806876	0.994096	-0.0423065
MARTIN_VIRAL_GPCR_SIGNALING_DN	0.0367825	-0.15353	0.071189	0.0336503	-0.145797	0.744959	0.0344537	-0.134535	0.0322445	0.0473123	-0.144621
MARTIN_VIRAL_GPCR_SIGNALING_UP	0.0478776	-0.0779106	0.891177	0.0606246	0.00149508	0.947353	0.0486311	-0.0072896	0.838164	0.994669	-0.0279017
MARTINEZ_RB1_AND_TP53_TARGETS_DN	0.127693	-0.0122162	0.0935864	0.124412	-0.00294277	0.875979	0.127913	0.0133661	0.968205	0.535225	-0.00059761
MARTINEZ_RB1_AND_TP53_TARGETS_UP	0.101168	-0.00484587	0.450056	0.0999846	-0.00859114	0.928654	0.104538	0.0282414	0.362417	0.707131	0.0049348
MARTINEZ_RB1_TARGETS_DN	0.111566	-0.0071564	0.285031	0.111532	-0.0162293	0.901015	0.11243	0.00550608	0.884665	0.813367	-0.00595986
MARTINEZ_RB1_TARGETS_UP	0.11703	-0.0170258	0.232211	0.110804	-0.0284143	0.901015	0.118333	0.0107439	0.723349	0.706903	-0.0115654
MARTINEZ_RESPONSE_TO_TRABECTEDIN	0.0394239	-0.0590003	0.534923	0.0453513	0.156953	0.744715	0.0478125	0.0930215	0.963489	0.927333	0.0636582
MARTINEZ_RESPONSE_TO_TRABECTEDIN_DN	0.10528	-0.0623213	0.00248912	0.101453	-0.0167267	0.92906	0.108651	-0.0413334	0.226211	0.0194078	-0.0401271
MARTINEZ_RESPONSE_TO_TRABECTEDIN_UP	0.33102	-0.0272879	0.0198591	0.348058	-0.032955	0.955046	0.332299	0.0132726	0.790602	0.210232	-0.0156568
MARTINEZ_TP53_TARGETS_DN	0.131095	-0.0166928	0.0379776	0.125892	-0.0236783	0.791716	0.129571	0.00359145	0.99895	0.319856	-0.0122599
MARTINEZ_TP53_TARGETS_UP	0.0974044	-0.00417664	0.715691	0.0952601	-0.025849	0.988548	0.100508	0.0206192	0.415536	0.874195	-0.00313547
MARTORIATI_MDM4_TARGETS_FETAL_LIVER_DN	0.0901574	-0.0473623	0.112621	0.0831627	0.0352608	0.877443	0.0941802	-0.00762678	0.98637	0.588575	-0.0065761
MARTORIATI_MDM4_TARGETS_FETAL_LIVER_UP	0.104538	-0.0254268	0.182487	0.108241	0.00611411	0.950047	0.101989	-0.0554086	0.502094	0.55896	-0.0249071
MARTORIATI_MDM4_TARGETS_NEUROEPITHELIUM_DN	0.0293512	-0.0384968	0.134999	0.0292986	-0.131482	0.305541	0.0292403	-0.033867	0.726627	0.319462	-0.0679486
MARTORIATI_MDM4_TARGETS_NEUROEPITHELIUM_UP	0.121799	-0.0250939	0.430273	0.121698	-0.0287466	0.857802	0.127172	0.0107728	0.99895	0.920108	-0.0143559
MARZEC_IL2_SIGNALING_DN	0.03251	0.0238146	0.906248	0.0581443	0.433391	0.689164	0.0376477	-0.0033261	0.89937	0.979117	0.151293
MARZEC_IL2_SIGNALING_UP	0.0778704	-0.0949114	0.0601095	0.0819913	-0.0193067	0.928654	0.0781015	-0.00595119	0.925086	0.431423	-0.0400564
MASSARWEH_RESPONSE_TO_ESTRADIOL	0.0647746	-0.124947	0.00329221	0.0558667	-0.131557	0.884494	0.0749162	0.0296503	0.894814	0.0642337	-0.0756179
MASSARWEH_TAMOXIFEN_RESISTANCE_DN	0.0439928	-0.0197705	0.274892	0.0421592	-0.0426891	0.991867	0.0461839	0.0303307	0.345735	0.579766	-0.0107096
MASSARWEH_TAMOXIFEN_RESISTANCE_UP	0.0515	-0.027243	0.606367	0.0541719	-0.00812715	0.999371	0.0544779	0.0111731	0.682636	0.939963	-0.00806571
MATSUDA_NATURAL_KILLER_DIFFERENTIATION	0.107887	-0.00172543	0.374638	0.104078	0.00819757	0.968452	0.108895	0.0124662	0.838096	0.881546	0.00631279
MATTIOLI_MGUS_VS_PCL	0.215113	-0.0258477	0.269791	0.20579	5.29886e-05	0.969924	0.208873	-0.041019	0.118043	0.325057	-0.0222712
MATTIOLI_MULTIPLE_MYELOMA_WITH_14Q32_TRANSLOCATIONS	0.0650946	-0.0575599	0.0954629	0.0635806	-0.0602394	0.853158	0.0622404	-0.135907	0.00687324	0.020445	-0.0845689
MATZUK_CENTRAL_FOR_FEMALE_FERTILITY	0.113343	-0.0270292	0.576453	0.112947	0.0388499	0.998014	0.113112	0.0141597	0.806876	0.957145	0.00866012
MATZUK_MALE_REPRODUCTION_SERTOLI	0.0887086	-0.135064	0.0071656	0.0846359	-0.137938	0.781955	0.0850811	-0.0868048	0.126647	0.0245088	-0.119935
MATZUK_MEIOTIC_AND_DNA_REPAIR	0.04736	0.0512483	0.00796135	0.0421156	-0.0511114	0.950047	0.0452783	0.00313475	0.87443	0.123095	0.00109053
MATZUK_SPERMATID_DIFFERENTIATION	0.0658493	-0.0730148	0.275507	0.0652967	0.0116887	0.969924	0.0705786	-0.0629649	0.964931	0.844175	-0.0414303
MATZUK_SPERMATOCYTE	0.105021	0.0225783	0.318065	0.0967288	-0.00412743	0.950047	0.103018	-0.00796393	0.774247	0.820646	0.00349565
MATZUK_SPERMATOZOA	0.0570842	-0.0382568	0.450056	0.0610646	0.0743673	0.916873	0.0643557	0.0737561	0.40827	0.735705	0.0366222
MAYBURD_RESPONSE_TO_L663536_DN	0.159736	-0.00394619	0.703543	0.155529	-0.00598164	0.969924	0.154869	-0.0491897	0.482519	0.898212	-0.0197058
MAYBURD_RESPONSE_TO_L663536_UP	0.0646413	0.0115186	0.694146	0.0548359	0.0248952	0.969924	0.0643843	0.00982412	0.943752	0.988893	0.0154127
MCBRYAN_PUBERTAL_BREAST_3_4WK_DN	0.0954667	0.0259215	0.239076	0.0949796	0.0268246	0.980188	0.104961	0.11827	0.0599019	0.201655	0.0570053
MCBRYAN_PUBERTAL_BREAST_3_4WK_UP	0.0931043	0.0849807	0.00541505	0.100497	0.113324	0.595482	0.0983135	0.115137	0.000850502	0.000262763	0.10448
MCBRYAN_PUBERTAL_BREAST_4_5WK_DN	0.0576089	-0.0774928	0.0278442	0.0565597	-0.00845191	0.969924	0.0622385	0.00923468	0.88915	0.280532	-0.02557
MCBRYAN_PUBERTAL_BREAST_4_5WK_UP	0.129386	0.0126212	0.676984	0.135054	0.0385268	0.853158	0.134449	0.0667676	0.0342429	0.249575	0.0393052
MCBRYAN_PUBERTAL_BREAST_5_6WK_DN	0.116207	-0.121866	0.00156008	0.101371	-0.0628633	0.982217	0.133274	0.00171528	0.884983	0.0398744	-0.0610047
MCBRYAN_PUBERTAL_BREAST_5_6WK_UP	0.0554451	0.0107731	0.862361	0.0575303	0.135599	0.406939	0.0625288	0.185852	0.0112839	0.0864459	0.110741
MCBRYAN_PUBERTAL_BREAST_6_7WK_DN	0.0667832	0.10584	0.0691319	0.0639817	0.0691591	0.808624	0.0737002	0.242195	0.00653403	0.0146973	0.139065
MCBRYAN_PUBERTAL_BREAST_6_7WK_UP	0.0905685	-0.0782215	0.00226109	0.0810976	-0.0912144	0.982217	0.09977	0.0122778	0.674959	0.0429422	-0.052386
MCBRYAN_PUBERTAL_TGFB1_TARGETS_DN	0.0831643	-0.0934351	0.0698735	0.0966464	0.063901	0.902583	0.0918081	0.0645685	0.510025	0.332684	0.0116782
MCBRYAN_PUBERTAL_TGFB1_TARGETS_UP	0.15588	-0.0332029	0.0830703	0.152401	0.0130072	0.970029	0.161013	0.0191431	0.445951	0.354223	-0.000350875
MCCABE_BOUND_BY_HOXC6	0.0434253	-0.0146831	0.520626	0.0434886	-0.0528394	0.935404	0.0436553	0.0102522	0.824444	0.935061	-0.0190901
MCCABE_HOXC6_TARGETS_CANCER_UP	0.0350002	-0.0690598	0.285837	0.037047	0.0129335	0.969924	0.0455648	0.141297	0.647216	0.752478	0.0283903
MCCLUNG_COCAIN_REWARD_4WK	0.0519991	-0.206105	0.00023361	0.046551	-0.297069	0.573441	0.0542179	-0.131219	0.109845	0.00108932	-0.211464
MCCLUNG_COCAINE_REWARD_5D	0.0534162	-0.076603	0.0317596	0.0540526	-0.15297	0.62518	0.0558297	-0.022469	0.862825	0.228475	-0.0840139
MCCLUNG_CREB1_TARGETS_DN	0.0509073	-0.157975	0.000214313	0.0514316	-0.0361071	0.916873	0.0573081	-0.00366166	0.925086	0.0084894	-0.0659147
MCCLUNG_CREB1_TARGETS_UP	0.116163	0.0423206	0.175954	0.112968	-0.0060252	0.969924	0.116782	0.0641229	0.347628	0.463589	0.0334728
MCCLUNG_DELTA_FOSB_TARGETS_2WK	0.0704065	-0.0181127	0.881317	0.0711026	-0.0187112	0.969924	0.0740612	-0.0136838	0.763268	0.990546	-0.0168359
MCCLUNG_DELTA_FOSB_TARGETS_8WK	0.0559841	-0.072689	0.194297	0.0620055	0.0213578	0.896954	0.0594694	-0.000368363	0.892918	0.714405	-0.0172332
MCDOWELL_ACUTE_LUNG_INJURY_DN	0.0302917	-0.00957626	0.848334	0.0248836	-0.144968	0.592364	0.0288641	-0.116193	0.380683	0.76934	-0.0902458
MCDOWELL_ACUTE_LUNG_INJURY_UP	0.151276	-0.089845	0.0407779	0.146087	-0.121683	0.845118	0.148891	-0.0641725	0.518489	0.234502	-0.0919002
MCGARVEY_SILENCED_BY_METHYLATION_IN_COLON_CANCER	0.0169217	0.296109	0.100605	0.0176171	0.468954	0.489508	0.0229485	0.291127	0.0963761	0.0980751	0.352063
MCLACHLAN_DENTAL_CARIES_DN	0.0485083	-0.0852421	0.0171484	0.0518658	0.0571529	0.908278	0.0481033	-0.103303	0.0807194	0.037695	-0.0437974
MCLACHLAN_DENTAL_CARIES_UP	0.0778811	0.0370286	0.624067	0.0791892	0.0261361	0.990599	0.075385	0.0541778	0.883921	0.976455	0.0391142
MCMURRAY_TP53_HRAS_COOPERATION_RESPONSE_DN	0.00143328	Inf	0.006332	0.00399227	Inf	0.511056	0	NA	0.668414	0.0561581	NA
MCMURRAY_TP53_HRAS_COOPERATION_RESPONSE_UP	0.164879	0.116022	0.00887527	0.150778	0.139547	0.859829	0.144588	-0.00451881	0.690185	0.105382	0.0836835
MEBARKI_HCC_PROGENITOR_FZD8CRD_DN	0.0244462	0.034413	0.659765	0.0247811	-0.0325473	0.969924	0.0231281	0.0324113	0.703395	0.952829	0.0114257
MEBARKI_HCC_PROGENITOR_FZD8CRD_UP	0.0509415	0.240303	0.534366	0.0381482	-0.0562907	0.947863	0.0408933	0.00966758	0.971882	0.964786	0.0645599
MEBARKI_HCC_PROGENITOR_WNT_DN	0	NA	0.649575	0.00030142	Inf	0.925039	0	NA	0.770265	0.956742	NA
MEBARKI_HCC_PROGENITOR_WNT_DN_BLOCKED_BY_FZD8CRD	0	NA	0.772346	0	NA	0.999371	0	NA	0.946521	0.995918	NA
MEBARKI_HCC_PROGENITOR_WNT_UP	0.0401052	0.220365	0.00729593	0.0363431	-0.0528565	0.967933	0.0394465	0.148309	0.0925341	0.0230161	0.105272
MEBARKI_HCC_PROGENITOR_WNT_UP_BLOCKED_BY_FZD8CRD	0.0316826	0.136823	0.132881	0.0303036	-0.0442667	0.96293	0.0313905	0.0347578	0.777813	0.594092	0.0424381
MEBARKI_HCC_PROGENITOR_WNT_UP_CTNNB1_DEPENDENT	0.0322794	0.335526	0.000101042	0.0309595	0.0578287	0.92401	0.0320206	0.272863	0.00507826	5.76465e-05	0.222073
MEBARKI_HCC_PROGENITOR_WNT_UP_CTNNB1_DEPENDENT_BLOCKED_BY_FZD8CRD	0.0247026	0.193946	0.00288378	0.0217053	-0.129283	0.826428	0.0231352	0.0762888	0.232403	0.0202788	0.0469838
MEDINA_SMARCA4_TARGETS	0.0616093	-0.0839875	0.196711	0.0604579	-0.0434041	0.864349	0.0605666	-0.0473391	0.930958	0.71899	-0.0582436
MEISSNER_BRAIN_HCP_WITH_H3_UNMETHYLATED	0	NA	0.0208235	0	NA	0.92906	0	NA	0.803515	0.215043	NA
MEISSNER_BRAIN_HCP_WITH_H3K27ME3	0.0350289	0.0463231	0.317274	0.0365948	-0.0397085	0.980581	0.0368825	0.0593627	0.103228	0.332388	0.0219924
MEISSNER_BRAIN_HCP_WITH_H3K4ME2_AND_H3K27ME3	0.00481734	-0.651672	0.0127474	0.00996179	-0.273761	0.857802	0.00851956	0.0829065	0.894814	0.159794	-0.280842
MEISSNER_BRAIN_HCP_WITH_H3K4ME3_AND_H3K27ME3	0.0528527	-0.0214815	0.590583	0.0525605	-0.0692899	0.870922	0.0554732	0.0528542	0.213275	0.620028	-0.0126391
MEISSNER_BRAIN_ICP_WITH_H3K4ME3	0.0383948	0.00100292	0.96942	0.0382481	-0.00150883	0.939632	0.0384482	0.00100152	0.650605	0.983794	0.000165203
MEISSNER_ES_ICP_WITH_H3K4ME3	0.0369856	0.00100292	0.759849	0.0368443	-0.00351816	0.815225	0.037037	0.00100152	0.762742	0.959526	-0.000504572
MEISSNER_NPC_HCP_WITH_H3_UNMETHYLATED	0.0278402	0.151087	0.00119634	0.0265262	0.00328793	0.969924	0.0290556	0.177374	1.23658e-05	2.61341e-06	0.110583
MEISSNER_NPC_HCP_WITH_H3K27ME3	0	NA	0.298585	0	NA	0.969924	0	NA	0.984937	0.867478	NA
MEISSNER_NPC_HCP_WITH_H3K4ME2	0.0341921	0.115781	9.63012e-07	0.034587	0.00725467	0.950047	0.0331675	0.0601033	0.0103948	1.8075e-06	0.0610462
MEISSNER_NPC_HCP_WITH_H3K4ME2_AND_H3K27ME3	0.0181103	0.131337	0.00179489	0.0180129	0.0213446	0.991867	0.0189883	0.143125	0.000284323	6.10291e-05	0.0986021
MEISSNER_NPC_HCP_WITH_H3K4ME3_AND_H3K27ME3	0.0075448	-0.00359625	0.96118	0.00816307	0.118438	0.951371	0.0101246	0.366665	0.122359	0.625332	0.160502
MELLMAN_TUT1_TARGETS_DN	0.115148	-0.0549844	0.0853909	0.110275	-0.103143	0.760982	0.113889	-0.0456993	0.465264	0.321067	-0.0679424
MENSE_HYPOXIA_UP	0.0862921	-0.108665	0.171169	0.105855	0.0459437	0.908558	0.098264	0.01223	0.874235	0.67792	-0.0168305
MIDORIKAWA_AMPLIFIED_IN_LIVER_CANCER	0.0746101	0.0350734	0.317249	0.0762274	0.0576129	0.826428	0.0759465	0.0279635	0.634664	0.732395	0.0402166
MIKKELSEN_ES_HCP_WITH_H3_UNMETHYLATED	0	NA	0.845983	0	NA	0.939632	0	NA	0.976629	0.99776	NA
MIKKELSEN_ES_ICP_WITH_H3K27ME3	0	NA	0.205522	0	NA	0.815225	0	NA	0.693103	0.635322	NA
MIKKELSEN_ES_ICP_WITH_H3K4ME3	0.0279967	-0.0195041	0.96248	0.0301053	-0.065005	0.884332	0.0278905	0.00445898	0.81607	0.993847	-0.0266834
MIKKELSEN_ES_ICP_WITH_H3K4ME3_AND_H3K27ME3	0.0145291	0.131299	0.248773	0.0123297	-0.0322527	0.962255	0.0150904	0.101702	0.196667	0.410776	0.0669159
MIKKELSEN_ES_LCP_WITH_H3K4ME3	0.0323819	0.117297	0.00140428	0.0341207	0.132774	0.688068	0.0320635	0.127812	0.0514599	0.00298354	0.125961
MIKKELSEN_IPS_HCP_WITH_H3_UNMETHYLATED	0	NA	0.0229167	0.00647516	2.40898	0.406939	0	NA	0.829605	0.136786	NA
MIKKELSEN_IPS_ICP_WITH_H3K27ME3	0	NA	0.791287	0	NA	0.955934	0	NA	0.940946	0.994911	NA
MIKKELSEN_IPS_ICP_WITH_H3K4ME3_AND_H327ME3	0.0111124	0.104569	0.658969	0.00931947	-0.190948	0.928654	0.012503	0.107835	0.457228	0.863132	0.00715219
MIKKELSEN_IPS_LCP_WITH_H3K4ME3	0.0357932	0.126443	0.00562523	0.0367379	-0.0102118	0.980188	0.0360034	0.138085	0.00598178	0.00212953	0.084772
MIKKELSEN_IPS_WITH_HCP_H3K27ME3	0.0136077	-0.0903206	0.0125331	0.0121233	-0.172029	0.733064	0.0147672	0.0125018	0.858416	0.138553	-0.0832827
MIKKELSEN_MCV6_HCP_WITH_H3K27ME3	0.0129643	0.21925	0.000168937	0.0134301	0.0777378	0.92292	0.013511	0.150054	0.0218522	0.000316311	0.149014
MIKKELSEN_MCV6_ICP_WITH_H3K27ME3	0	NA	0.629425	0	NA	0.887941	0	NA	0.939525	0.972296	NA
MIKKELSEN_MCV6_ICP_WITH_H3K4ME3_AND_H3K27ME3	0	NA	0.167285	0	NA	0.998018	0	NA	0.563071	0.57904	NA
MIKKELSEN_MCV6_LCP_WITH_H3K4ME3	0.0537627	0.0652184	0.276088	0.0550765	0.00435503	0.968452	0.0553089	0.121723	0.202432	0.442168	0.0637655
MIKKELSEN_MEF_HCP_WITH_H3_UNMETHYLATED	0.018471	-0.0145391	0.42007	0.0166684	-0.0394988	0.718187	0.0192447	0.0603791	0.141031	0.388922	0.00211375
MIKKELSEN_MEF_HCP_WITH_H3K27ME3	0.00535086	0.863586	1.80599e-09	0.0046671	0.358704	0.865019	0.00603812	0.831503	5.64367e-09	7.15324e-15	0.684598
MIKKELSEN_MEF_ICP_WITH_H3K27ME3	0	NA	0.0550359	0.000573348	Inf	0.901015	0.000393815	Inf	0.221432	0.172273	NA
MIKKELSEN_MEF_ICP_WITH_H3K4ME3_AND_H3K27ME3	0	NA	0.854803	0	NA	0.950047	0	NA	0.953764	0.997703	NA
MIKKELSEN_MEF_LCP_WITH_H3K27ME3	0	NA	0.933083	0	NA	0.999371	0	NA	0.527906	0.964788	NA
MIKKELSEN_MEF_LCP_WITH_H3K4ME3	0.0519112	0.0666199	0.637562	0.0535675	-0.0329222	0.969924	0.0498755	0.0541933	0.512752	0.890437	0.029297
MIKKELSEN_NPC_HCP_WITH_H3K27ME3	0.00606382	0.359826	0.00130553	0.00540685	0.0389556	0.995918	0.00609895	0.331099	0.0318771	0.00256995	0.243294
MIKKELSEN_NPC_HCP_WITH_H3K4ME3_AND_H3K27ME3	0.0233894	0.0370968	0.350085	0.0220831	-0.0396106	0.969924	0.0238155	0.028634	0.50388	0.739832	0.00870675
MIKKELSEN_NPC_ICP_WITH_H3K4ME3	0.0289483	-0.0249927	0.264883	0.0286564	-0.130124	0.733064	0.027192	-0.0521983	0.505838	0.590602	-0.069105
MIKKELSEN_NPC_LCP_WITH_H3K4ME3	0.0371438	0.00426991	0.792928	0.0434007	-0.082006	0.910901	0.032849	-0.0351241	0.541284	0.930543	-0.03762
MILI_PSEUDOPODIA	0.0998121	-0.0234895	0.483703	0.0919186	0.0245517	0.853158	0.103009	0.0162045	0.658232	0.856354	0.00575555
MILI_PSEUDOPODIA_CHEMOTAXIS_DN	0.128186	-0.0605226	0.117436	0.128596	-0.0276636	0.908558	0.136187	-0.00335276	0.992256	0.610531	-0.030513
MILI_PSEUDOPODIA_CHEMOTAXIS_UP	0.120143	-0.0300446	0.215632	0.118578	0.05535	0.595339	0.124183	0.0126116	0.905612	0.635624	0.012639
MILI_PSEUDOPODIA_HAPTOTAXIS_DN	0.099909	0.0164033	0.392263	0.102352	0.0133273	0.981018	0.103349	0.0230857	0.410225	0.718264	0.0176054
MILI_PSEUDOPODIA_HAPTOTAXIS_UP	0.12312	-0.0200057	0.534923	0.119554	0.0403828	0.817714	0.126938	0.00265084	0.984098	0.946211	0.00767597
MISHRA_CARCINOMA_ASSOCIATED_FIBROBLAST_DN	0.207543	0.113701	7.91728e-06	0.201833	0.0286035	0.84289	0.216468	0.181586	3.29149e-05	5.94219e-08	0.107964
MISHRA_CARCINOMA_ASSOCIATED_FIBROBLAST_UP	0.119659	0.109195	0.26022	0.0972069	0.0268877	0.991867	0.140253	0.332575	0.00350976	0.029489	0.156219
MISSIAGLIA_REGULATED_BY_METHYLATION_DN	0.125158	0.137788	0.741668	0.0947421	-0.000761652	0.969924	0.107793	0.0341493	0.975693	0.994317	0.0570586
MISSIAGLIA_REGULATED_BY_METHYLATION_UP	0.166463	-0.0279283	0.362057	0.171221	-0.0218416	0.901015	0.172332	0.0494313	0.693103	0.812162	-0.000112862
MITSIADES_RESPONSE_TO_APLIDIN_DN	0.104714	0.00806904	0.716064	0.0899792	0.00500972	0.949286	0.111014	0.0550986	0.603347	0.938569	0.0227258
MITSIADES_RESPONSE_TO_APLIDIN_UP	0.0867313	-0.173152	0.000380967	0.0864008	-0.145558	0.573548	0.0946223	-0.0129395	0.463913	0.00532043	-0.11055
MIYAGAWA_TARGETS_OF_EWSR1_ETS_FUSIONS_DN	0.0343249	-0.0563418	0.229835	0.0400653	0.0805971	0.898194	0.0374327	-0.00677564	0.804789	0.731976	0.00582655
MIYAGAWA_TARGETS_OF_EWSR1_ETS_FUSIONS_UP	0.0510992	0.00487828	0.780807	0.0508351	-0.0601581	0.781955	0.0547949	0.0372928	0.433635	0.850398	-0.00599568
MMS_MOUSE_LYMPH_HIGH_4HRS_UP	0.133624	-0.0709365	0.0262263	0.138849	-0.024729	0.879285	0.129931	-0.0898871	0.149424	0.0783863	-0.0618509
MODY_HIPPOCAMPUS_NEONATAL	0.293546	0.0797296	0.173357	0.258559	-0.00181707	0.98702	0.29158	0.0710505	0.14778	0.289261	0.0496544
MODY_HIPPOCAMPUS_POSTNATAL	0.150506	-0.00578968	0.609573	0.15057	-0.0686006	0.608484	0.150755	-0.0144374	0.601905	0.808988	-0.0296092
MODY_HIPPOCAMPUS_PRENATAL	0.391992	0.00474049	0.786005	0.364563	-0.0455693	0.748906	0.374676	-0.0111626	0.81389	0.96135	-0.0173305
MOHANKUMAR_HOXA1_TARGETS_DN	0.0656154	0.0278775	0.349753	0.0636883	-0.0685366	1	0.0726077	0.105585	0.0296161	0.16586	0.0216419
MOHANKUMAR_HOXA1_TARGETS_UP	0.102013	-0.0272386	0.0198911	0.100672	-0.0217834	0.853158	0.103691	-0.0142716	0.640551	0.17115	-0.0210979
MOLENAAR_TARGETS_OF_CCND1_AND_CDK4_DN	0.0342485	0.178185	0.0553311	0.0265303	-0.00484189	0.942698	0.0319845	0.0398465	0.940946	0.419994	0.0710632
MOLENAAR_TARGETS_OF_CCND1_AND_CDK4_UP	0.0260021	-0.0971791	0.360849	0.0334942	0.0218594	0.929464	0.0331864	0.127744	0.654108	0.804586	0.0174749
MONNIER_POSTRADIATION_TUMOR_ESCAPE_DN	0.0997064	-0.0465366	0.200096	0.102762	-0.0322649	0.916873	0.102755	0.00889359	0.994626	0.756924	-0.0233026
MONNIER_POSTRADIATION_TUMOR_ESCAPE_UP	0.0673401	-0.0761175	0.00570899	0.0608711	-0.0128652	0.982217	0.0693023	-0.0526178	0.384128	0.0559883	-0.0472002
MOOTHA_FFA_OXYDATION	0.0488114	0.0900255	0.309338	0.0558167	0.139296	0.928507	0.0562234	0.139515	0.541284	0.714154	0.122945
MOOTHA_GLUCONEOGENESIS	0.204073	0.0160155	0.669669	0.200767	-0.00963299	0.918473	0.205026	0.0256224	0.721133	0.950698	0.0106683
MOOTHA_HUMAN_MITODB_6_2002	0.174542	0.0437136	0.349081	0.160107	-0.0643488	0.969924	0.161784	-0.0286476	0.526277	0.750632	-0.0164276
MOOTHA_MITOCHONDRIA	0.159956	0.0383359	0.419625	0.146483	-0.0527191	0.972385	0.146742	-0.0372452	0.530148	0.801027	-0.0172094
MOOTHA_PGC	0.171784	-0.00163878	0.626465	0.170711	-0.0144856	0.92906	0.171915	0.00423478	0.781675	0.954349	-0.00396319
MOOTHA_VOXPHOS	0.412058	0.0219951	0.724115	0.381531	-0.0869792	0.935611	0.376113	-0.013697	0.806876	0.976493	-0.026227
MOREAUX_B_LYMPHOCYTE_MATURATION_BY_TACI_DN	0.125338	-0.00584113	0.941482	0.120924	0.126458	0.921744	0.11981	-0.0330988	0.547428	0.960247	0.0291728
MOREAUX_B_LYMPHOCYTE_MATURATION_BY_TACI_UP	0.0582718	-0.00710753	0.818385	0.0555858	-0.144653	0.733064	0.0626845	0.0714077	0.134288	0.539022	-0.0267844
MOREAUX_MULTIPLE_MYELOMA_BY_TACI_DN	0.0967639	0.00344797	0.865193	0.0929455	0.0985587	0.821821	0.0960143	-0.0165851	0.707819	0.967468	0.0284738
MOREAUX_MULTIPLE_MYELOMA_BY_TACI_UP	0.0405683	-0.0594405	0.0479708	0.041428	-0.0726473	0.826428	0.0437071	0.0117383	0.78827	0.327234	-0.0401165
MOREIRA_RESPONSE_TO_TSA_UP	0.353678	-0.0162877	0.571829	0.33416	-0.0633288	0.668993	0.361749	0.0338055	0.411781	0.717693	-0.0152704
MORI_EMU_MYC_LYMPHOMA_BY_ONSET_TIME_UP	0.0830073	-0.0602933	0.441664	0.0816011	0.0435874	0.939632	0.0763399	-0.09951	0.271061	0.626769	-0.0387386
MORI_IMMATURE_B_LYMPHOCYTE_DN	0.18182	0.148122	0.699681	0.148601	0.0571253	0.950047	0.151993	0.0254222	0.545497	0.917025	0.0768899
MORI_IMMATURE_B_LYMPHOCYTE_UP	0.114231	0.0121341	0.96118	0.114094	-0.035282	0.793411	0.109599	-0.0184722	0.535399	0.937841	-0.0138733
MORI_LARGE_PRE_BII_LYMPHOCYTE_DN	0.0783331	0.0416957	0.870554	0.0754545	-0.112833	0.689164	0.0723763	-0.0323036	0.417484	0.837252	-0.0344803
MORI_LARGE_PRE_BII_LYMPHOCYTE_UP	0.193085	0.144068	0.984539	0.161214	0.0379805	0.991867	0.156981	-0.0600887	0.431432	0.942877	0.0406534
MORI_MATURE_B_LYMPHOCYTE_DN	0.161967	0.0768978	0.511758	0.137748	-0.0516653	0.980778	0.142979	-0.0192505	0.712532	0.914431	0.00199402
MORI_MATURE_B_LYMPHOCYTE_UP	0.0573654	-0.0470015	0.363833	0.0629187	-0.0279078	0.950047	0.0543659	-0.0457	0.779444	0.854461	-0.0402031
MORI_PLASMA_CELL_DN	0.0689105	0.0684202	0.0242175	0.0719898	0.072092	0.853158	0.0704859	0.0646634	0.402446	0.14352	0.0683919
MORI_PLASMA_CELL_UP	0.139677	0.118098	0.00208619	0.129634	0.0678671	0.875045	0.136466	0.0426806	0.160179	0.012353	0.0762153
MORI_PRE_BI_LYMPHOCYTE_DN	0.0944135	-0.161166	0.00752494	0.0990181	-0.0524426	0.815225	0.101092	-0.0276912	0.578323	0.080017	-0.0804333
MORI_PRE_BI_LYMPHOCYTE_UP	0.181907	0.151628	0.628916	0.150824	0.0944337	0.976212	0.153664	0.0157128	0.88915	0.976356	0.0872581
MORI_SMALL_PRE_BII_LYMPHOCYTE_DN	0.12957	-0.0229152	0.16394	0.121182	-0.0585864	0.754256	0.117708	-0.0698737	0.219595	0.301642	-0.0504584
MORI_SMALL_PRE_BII_LYMPHOCYTE_UP	0.064228	-0.04539	0.179776	0.0745503	0.0248909	0.969924	0.0699712	0.0712461	0.152743	0.298244	0.0169157
MOSERLE_IFNA_RESPONSE	0.0855836	0.0785863	0.422231	0.0829713	-0.00889771	0.968608	0.0810464	-0.0330667	0.853931	0.909889	0.0122073
MUELLER_COMMON_TARGETS_OF_AML_FUSIONS_DN	0.0547553	-0.141447	0.0230571	0.0568875	0.00157276	0.991867	0.0579164	-0.0527541	0.741231	0.226981	-0.0642096
MUELLER_METHYLATED_IN_GLIOBLASTOMA	0.131442	0.139818	0.0384741	0.119564	0.0704616	0.821873	0.158022	0.333507	6.59084e-06	2.80754e-05	0.181262
MUELLER_PLURINET	0.13751	0.0325852	0.917671	0.11785	-0.00383944	0.935816	0.130273	-0.0223403	0.584673	0.967188	0.00213513
MULLIGAN_NTF3_SIGNALING_VIA_INSR_AND_IGF1R_UP	0.181787	-0.0685674	0.482828	0.15902	0.162516	0.864725	0.192304	-0.00812722	0.867364	0.916782	0.0286072
MULLIGHAN_MLL_SIGNATURE_1_DN	0.0706622	-0.0529885	0.0335653	0.0739901	0.0107201	0.990599	0.0732304	-0.0287592	0.37226	0.186111	-0.0236759
MULLIGHAN_MLL_SIGNATURE_1_UP	0.0841949	0.0236659	0.0317448	0.0831244	-0.00860957	0.995918	0.0851404	0.0283801	0.147201	0.0967471	0.0144788
MULLIGHAN_MLL_SIGNATURE_2_DN	0.0758977	-0.068164	0.107647	0.0759353	-0.0307654	0.969924	0.0854637	0.0384989	0.903916	0.580074	-0.0201435
MULLIGHAN_MLL_SIGNATURE_2_UP	0.0735107	0.0164224	0.163198	0.0722797	-0.00782113	0.991867	0.0755606	0.0416938	0.024273	0.0859744	0.016765
MULLIGHAN_NPM1_MUTATED_SIGNATURE_1_DN	0.0891284	0.0105396	0.95633	0.083365	-0.0972923	0.363564	0.0909699	0.0229411	0.388141	0.675908	-0.0212705
MULLIGHAN_NPM1_MUTATED_SIGNATURE_1_UP	0.0556198	-0.0524161	0.531841	0.0516343	-0.0308535	0.972385	0.0575735	0.00449833	0.99895	0.970491	-0.0262571
MULLIGHAN_NPM1_MUTATED_SIGNATURE_2_DN	0.144761	-0.00134065	0.863374	0.134729	-0.0945014	0.513941	0.147649	0.0228903	0.411563	0.757132	-0.0243172
MULLIGHAN_NPM1_MUTATED_SIGNATURE_2_UP	0.0428589	0.0278192	0.502862	0.0432386	0.102298	0.853267	0.0418039	0.015333	0.728031	0.887297	0.0484833
MULLIGHAN_NPM1_SIGNATURE_3_DN	0.088475	0.0168197	0.606367	0.0841684	-0.0786079	0.461696	0.0906333	0.0286406	0.26355	0.516766	-0.0110492
MULLIGHAN_NPM1_SIGNATURE_3_UP	0.056256	-0.0379551	0.316753	0.0527379	-0.0393307	0.92906	0.0564917	-0.0282685	0.605889	0.750802	-0.0351848
MUNSHI_MULTIPLE_MYELOMA_UP	0.301546	-0.0346037	0.0325928	0.273735	-0.133105	0.70573	0.308221	0.0125051	0.894814	0.255702	-0.0517345
MURAKAMI_UV_RESPONSE_6HR_UP	0.203331	0.03582	0.150484	0.196584	0.00406114	0.996379	0.201249	0.0164924	0.355233	0.43848	0.0187912
NABA_BASEMENT_MEMBRANES	0.0406104	-0.000353126	0.383634	0.038821	0.138317	0.969924	0.0719952	0.545757	2.00221e-05	0.000614735	0.227907
NABA_COLLAGENS	0.0132653	-0.32445	0.11077	0.0165139	-0.0788914	0.991867	0.0165526	-0.104807	0.735126	0.53967	-0.169383
NABA_CORE_MATRISOME	0.0410279	0.144818	0.0185001	0.0497823	0.213424	0.513941	0.0437001	0.190386	0.0171713	0.00779435	0.182876
NABA_ECM_AFFILIATED	0.0601494	0.0595199	0.0105514	0.0627155	0.0322863	0.826428	0.0638678	0.100876	0.00023557	0.000205095	0.0642275
NABA_ECM_GLYCOPROTEINS	0.0504231	0.141231	0.005762	0.0607208	0.195063	0.513941	0.0533858	0.180088	0.0095414	0.00187414	0.172127
NABA_ECM_REGULATORS	0.0549894	0.0859294	0.0444239	0.0519718	-0.0537438	0.990599	0.0576992	0.114515	0.00611855	0.0115787	0.0489003
NABA_MATRISOME	0.0597257	0.0798	0.0285657	0.0626963	0.0576799	0.802598	0.0622354	0.116058	0.00151776	0.00222567	0.0845127
NABA_MATRISOME_ASSOCIATED	0.0559268	0.0428157	0.066604	0.0571865	0.0175333	0.980188	0.0582452	0.0739378	0.00107787	0.00395999	0.0447623
NABA_PROTEOGLYCANS	0	NA	0.0833699	0.00136222	Inf	0.791716	0	NA	0.016644	0.0340862	NA
NABA_SECRETED_FACTORS	0.0373215	-0.00435494	0.899974	0.0369925	-0.00366228	0.991867	0.0396972	0.11125	0.076651	0.498032	0.0344109
NADERI_BREAST_CANCER_PROGNOSIS_UP	0.0287093	0.263452	0.00615512	0.0252961	0.311781	0.605439	0.0293155	0.206608	0.302214	0.0347251	0.260614
NADLER_HYPERGLYCEMIA_AT_OBESITY	0.0952358	0.0247631	0.201877	0.103364	0.0423118	0.857576	0.0929257	-0.027711	0.973949	0.735934	0.0131213
NADLER_OBESITY_DN	0.181835	0.0154695	0.483703	0.170873	-0.0893879	0.857802	0.17123	-0.0213093	0.514006	0.797421	-0.0317426
NADLER_OBESITY_UP	0.233989	0.00735103	0.622001	0.230678	-0.0280279	0.867226	0.23802	0.0457107	0.065473	0.350788	0.0083446
NAGASHIMA_EGF_SIGNALING_UP	0.240327	-0.18717	0.000154983	0.208348	-0.357751	0.461527	0.250074	-0.0725475	0.105258	0.000620223	-0.205823
NAGASHIMA_NRG1_SIGNALING_DN	0.0334401	-0.0932322	0.354299	0.0295676	-0.151781	0.887314	0.0448298	0.148911	0.483134	0.707868	-0.0320339
NAGASHIMA_NRG1_SIGNALING_UP	0.13878	-0.199637	0.000427981	0.128862	-0.225895	0.516774	0.148052	-0.0663121	0.402796	0.00479392	-0.163948
NAKAJIMA_MAST_CELL	0.13245	0.0384472	0.518956	0.141258	0.0461329	0.969924	0.134375	0.0271193	0.479443	0.828253	0.0372331
NAKAMURA_ADIPOGENESIS_EARLY_DN	0.103499	0.022358	0.460401	0.096819	-0.043108	0.853158	0.0970208	-0.0681971	0.312447	0.650228	-0.029649
NAKAMURA_ADIPOGENESIS_EARLY_UP	0.0620048	-0.142654	0.000944987	0.0649176	-0.111001	0.730816	0.060046	-0.119965	0.297909	0.00936517	-0.12454
NAKAMURA_ADIPOGENESIS_LATE_DN	0.120816	0.0754172	0.126952	0.117409	0.0429143	0.991867	0.114596	-0.013623	0.694816	0.560274	0.0349028
NAKAMURA_ADIPOGENESIS_LATE_UP	0.0621923	-0.0604753	0.0312793	0.0630875	-0.0463661	0.972385	0.0661126	-0.0035321	0.981881	0.318801	-0.0367912
NAKAMURA_CANCER_MICROENVIRONMENT_DN	0.0525989	0.180401	0.351551	0.0391537	0.0945307	0.994256	0.0479641	0.0423093	0.750278	0.848163	0.105747
NAKAMURA_METASTASIS	0.0583391	-0.231445	0.00023361	0.0566399	-0.204141	0.450607	0.0626699	-0.0560665	0.608492	0.00366853	-0.163884
NAKAMURA_METASTASIS_MODEL_DN	0.0434501	0.0987087	0.107654	0.0383095	0.14635	0.966465	0.0536649	0.31236	0.000321385	0.00215378	0.185806
NAKAMURA_METASTASIS_MODEL_UP	0.0458233	-0.235393	0.000906235	0.0486465	-0.153433	0.643123	0.0461896	-0.171103	0.116358	0.00384289	-0.186643
NAKAMURA_TUMOR_ZONE_PERIPHERAL_VS_CENTRAL_DN	0.10353	-0.0404418	0.134106	0.105874	-0.0152316	0.948413	0.110338	0.0109098	0.982041	0.654977	-0.0149212
NAKAMURA_TUMOR_ZONE_PERIPHERAL_VS_CENTRAL_UP	0.141223	0.0207901	0.606396	0.133276	0.0441862	0.869235	0.134064	-0.00820291	0.804387	0.943873	0.0189245
NAKAYAMA_FRA2_TARGETS	0.0877057	-0.0408089	0.126015	0.0810869	-0.14789	0.869235	0.0885943	0.0474274	0.927105	0.599439	-0.0470904
NAKAYAMA_SOFT_TISSUE_TUMORS_PCA1_DN	0.0101117	-0.047742	0.70858	0.0174904	0.150164	0.969924	0.0112439	-0.103538	0.925086	0.988933	-0.000371846
NAKAYAMA_SOFT_TISSUE_TUMORS_PCA1_UP	0.0790544	0.173063	0.00166563	0.0744672	0.0577326	0.861662	0.0786541	0.14804	0.00345705	0.000435638	0.126278
NAKAYAMA_SOFT_TISSUE_TUMORS_PCA2_DN	0.0270308	0.0177441	0.423835	0.0246059	-0.0668585	0.853158	0.0259436	-0.0365777	0.421101	0.708549	-0.028564
NAKAYAMA_SOFT_TISSUE_TUMORS_PCA2_UP	0.0610738	0.241146	0.206254	0.0446979	-0.0151655	0.969924	0.0542501	0.110466	0.85056	0.738362	0.112149
NATSUME_RESPONSE_TO_INTERFERON_BETA_DN	0.312619	-0.0381946	0.0187133	0.317964	-0.0230264	0.969924	0.307908	-0.0169622	0.205731	0.0829558	-0.0260611
NATSUME_RESPONSE_TO_INTERFERON_BETA_UP	0.109959	-0.072822	0.0742004	0.0918505	-0.129368	0.558437	0.118968	0.0103681	0.828759	0.345284	-0.0639407
NELSON_RESPONSE_TO_ANDROGEN_UP	0.135596	-0.0515336	0.185859	0.135145	-0.0178136	0.963141	0.140845	0.0112683	0.744998	0.672699	-0.0193596
NEMETH_INFLAMMATORY_RESPONSE_LPS_DN	0.0853074	-0.230426	0.000254655	0.081915	-0.092982	0.821821	0.0899386	-0.0736755	0.343091	0.00402543	-0.132361
NEMETH_INFLAMMATORY_RESPONSE_LPS_UP	0.146973	-0.0693796	0.13988	0.127876	-0.185939	0.702002	0.151802	-0.00733313	0.911149	0.566097	-0.0875507
NEWMAN_ERCC6_TARGETS_DN	0.00418863	-1.13228	0.373676	0.00266297	0.175572	0.969924	0.0131761	0.677465	0.275816	0.595263	-0.0930822
NGUYEN_NOTCH1_TARGETS_DN	0.0980038	-0.0447649	0.138483	0.0908698	-0.0891405	0.994256	0.0997641	-0.062307	0.626269	0.556508	-0.0654041
NGUYEN_NOTCH1_TARGETS_UP	0.112191	-0.135549	0.00191972	0.107963	-0.155022	0.765774	0.127098	0.025905	0.741231	0.0338786	-0.0882222
NICK_RESPONSE_TO_PROC_TREATMENT_DN	0.0357019	-0.107915	0.402059	0.0427787	0.380071	0.92292	0.0415945	-0.0545591	0.923848	0.906269	0.0725322
NIKOLSKY_BREAST_CANCER_11Q12_Q14_AMPLICON	0.0372941	-0.0558801	0.269791	0.0353514	-0.205845	0.350667	0.0354311	-0.0304459	0.99895	0.580436	-0.0973904
NIKOLSKY_BREAST_CANCER_12Q13_Q21_AMPLICON	0.0494336	-0.0832531	0.0146224	0.0548623	0.0235642	0.998014	0.0499651	-0.0251908	0.674959	0.160493	-0.0282932
NIKOLSKY_BREAST_CANCER_16P13_AMPLICON	0.0478513	-0.120775	1.34662e-07	0.0472236	-0.161558	0.1017	0.0491312	-0.138971	1.01451e-05	6.51373e-11	-0.140435
NIKOLSKY_BREAST_CANCER_16Q24_AMPLICON	0.108589	0.0447725	0.0162251	0.106957	0.0945987	0.680794	0.111042	0.0725267	0.0107955	0.00606295	0.0706326
NIKOLSKY_BREAST_CANCER_17Q11_Q21_AMPLICON	0.0658775	-0.0677051	0.00226109	0.0673818	-0.0280061	0.96288	0.0695498	0.00277015	0.73125	0.0448912	-0.0309804
NIKOLSKY_BREAST_CANCER_17Q21_Q25_AMPLICON	0.0634636	-0.0263339	0.0251158	0.0598951	-0.0374615	0.821821	0.0640381	0.000450537	0.939671	0.246618	-0.021115
NIKOLSKY_BREAST_CANCER_1Q21_AMPLICON	0.0656689	0.27635	0.000348423	0.0590072	0.198635	0.594192	0.0618595	0.268909	0.00384079	9.03874e-05	0.247965
NIKOLSKY_BREAST_CANCER_20Q11_AMPLICON	0.0946972	-0.112448	0.00543034	0.101158	-0.10583	0.908558	0.0825518	-0.186333	0.000210006	0.000113688	-0.13487
NIKOLSKY_BREAST_CANCER_20Q12_Q13_AMPLICON	0.0767857	-0.0124432	0.972252	0.0803997	0.0173899	0.968452	0.0756815	-0.0325464	0.483134	0.954336	-0.00919988
NIKOLSKY_BREAST_CANCER_6P24_P22_AMPLICON	0.0509497	-0.085209	0.469194	0.0339995	-0.272101	0.910901	0.0431342	-0.11242	0.445951	0.76837	-0.156577
NIKOLSKY_BREAST_CANCER_7P22_AMPLICON	0.034069	-0.132251	0.0696683	0.0348941	-0.00819715	0.991867	0.0388905	0.0400099	0.540563	0.361979	-0.0334794
NIKOLSKY_BREAST_CANCER_7Q21_Q22_AMPLICON	0.0692715	-0.0594485	0.125611	0.0719655	0.0181157	0.991867	0.0727921	-0.015825	0.640871	0.536739	-0.0190526
NIKOLSKY_BREAST_CANCER_8P12_P11_AMPLICON	0.0488185	0.181006	8.81806e-05	0.0475719	0.219338	0.791716	0.0505051	0.120067	0.244753	0.00123415	0.17347
NIKOLSKY_BREAST_CANCER_8Q12_Q22_AMPLICON	0.0799752	0.0218612	0.180302	0.0803012	-0.0111589	0.969924	0.0776583	-0.0120621	0.882154	0.712069	-0.000453268
NIKOLSKY_BREAST_CANCER_8Q23_Q24_AMPLICON	0.0624873	-0.00692664	0.53803	0.0627514	0.0351761	0.84289	0.0624428	-0.0415094	0.538052	0.83094	-0.00441999
NIKOLSKY_MUTATED_AND_AMPLIFIED_IN_BREAST_CANCER	0.0293319	-0.0803851	0.253377	0.0317155	-0.0436176	0.903672	0.032689	0.0553818	0.711322	0.726655	-0.0228736
NOJIMA_SFRP2_TARGETS_DN	0.226047	0.0187099	0.575764	0.200832	-0.0868063	0.780267	0.223828	0.0401568	0.488432	0.804635	-0.00931319
NOJIMA_SFRP2_TARGETS_UP	0.163262	-0.123594	0.00947554	0.158849	-0.109454	0.864349	0.172956	0.0329456	0.954631	0.137753	-0.066701
NOUSHMEHR_GBM_SILENCED_BY_METHYLATION	0.0572936	0.100736	0.00448737	0.0455618	-0.0876941	0.826428	0.0605525	0.164298	2.99741e-05	1.61412e-05	0.0591133
NOUZOVA_METHYLATED_IN_APL	0.00975166	-0.0488406	0.957651	0.0115565	0.304136	0.573548	0.0122281	0.152187	0.847194	0.957476	0.135827
NOUZOVA_TRETINOIN_AND_H4_ACETYLATION	0.0880885	0.0237081	0.496035	0.0883687	0.0428406	0.631248	0.0853046	-0.0194127	0.589628	0.760011	0.015712
NUNODA_RESPONSE_TO_DASATINIB_IMATINIB_UP	0.100647	-0.178633	0.00175726	0.0826509	-0.244877	0.595022	0.111734	0.00139204	0.992256	0.0326564	-0.140706
NUTT_GBM_VS_AO_GLIOMA_DN	0.241946	-0.0104086	0.704921	0.237057	-0.0199938	0.865019	0.242236	-0.0125067	0.78378	0.961034	-0.014303
NUTT_GBM_VS_AO_GLIOMA_UP	0.276189	0.0336623	0.0244923	0.270998	-0.00573602	0.939258	0.269171	0.00839246	0.884049	0.253849	0.0121062
NUYTTEN_EZH2_TARGETS_DN	0.0896562	0.116537	0.217817	0.0808159	0.0113733	0.92906	0.0821043	0.0076313	0.732535	0.701309	0.0451807
NUYTTEN_EZH2_TARGETS_UP	0.112682	-0.0388988	0.149028	0.112984	-0.0259373	0.86275	0.118264	0.0135842	0.89583	0.633119	-0.017084
NUYTTEN_NIPP1_TARGETS_DN	0.106036	0.0308826	0.0147543	0.106189	0.0476141	0.889029	0.107378	0.0329186	0.138468	0.0494486	0.0371385
NUYTTEN_NIPP1_TARGETS_UP	0.074808	-0.0182423	0.33915	0.0749707	-0.0035661	0.950047	0.0746911	-0.0200262	0.34675	0.624938	-0.0139449
ODONNELL_METASTASIS_UP	0.015898	-0.218603	1.65986e-05	0.0187715	-0.254368	0.841878	0.0194071	0.00773565	0.874459	0.00093234	-0.155078
ODONNELL_TARGETS_OF_MYC_AND_TFRC_DN	0.100547	0.18831	0.459829	0.0732508	0.0892607	0.980188	0.0835158	-0.00656269	0.90741	0.938116	0.090336
ODONNELL_TARGETS_OF_MYC_AND_TFRC_UP	0.0559345	-0.0398112	0.518956	0.0574705	0.0450763	0.951832	0.0521475	-0.0977706	0.646554	0.891939	-0.0308352
ODONNELL_TFRC_TARGETS_DN	0.0534708	0.200499	0.145227	0.0401997	0.0455802	0.991867	0.0480396	0.111617	0.424529	0.47079	0.119232
ODONNELL_TFRC_TARGETS_UP	0.0625861	-0.0970396	0.0105252	0.0654556	-0.0536224	0.875201	0.063218	-0.0559788	0.392002	0.0810205	-0.0688803
OHGUCHI_LIVER_HNF4A_TARGETS_DN	0.0173966	0.143713	0.00786196	0.0194425	0.102036	0.916873	0.0169828	0.121144	0.00410684	0.00194779	0.122297
OHGUCHI_LIVER_HNF4A_TARGETS_UP	0.0549036	0.0860948	0.229478	0.0465098	-0.0175669	0.982217	0.0560091	0.183598	0.00223623	0.0188604	0.0840421
OHM_METHYLATED_IN_ADULT_CANCERS	0.0609154	-0.0228125	0.650901	0.0646186	0.0121275	0.93905	0.0471012	-0.0215048	0.806876	0.965017	-0.0107299
OISHI_CHOLANGIOMA_STEM_CELL_LIKE_DN	0.061703	0.00750651	0.927809	0.0564132	-0.188352	0.733064	0.0632026	0.0657398	0.147306	0.595854	-0.0383684
OISHI_CHOLANGIOMA_STEM_CELL_LIKE_UP	0.0525391	0.0758889	0.000128556	0.0508989	0.0285009	0.815307	0.0518484	0.0491039	0.399944	0.00259399	0.0511646
OKUMURA_INFLAMMATORY_RESPONSE_LPS	0.0637606	-0.0805063	0.0261003	0.0644012	-0.0592828	0.983803	0.0667336	-0.0178234	0.994626	0.29097	-0.0525375
OLSSON_E2F3_TARGETS_DN	0.123201	-0.0177739	0.933937	0.125468	0.0979331	0.908558	0.115817	-0.0185126	0.690995	0.982914	0.0205488
OLSSON_E2F3_TARGETS_UP	0.0879501	-0.0431642	0.579226	0.0991624	0.0870131	0.86275	0.0865981	0.0210293	0.853931	0.944874	0.0216261
ONDER_CDH1_SIGNALING_VIA_CTNNB1	0.0598399	-0.00759432	0.892688	0.0641175	0.042312	0.975393	0.0657384	0.128815	0.325925	0.866331	0.0545109
ONDER_CDH1_TARGETS_1_DN	0.139944	-0.0742944	0.00153278	0.138981	0.0615948	0.98692	0.145919	-0.0268947	0.874386	0.0391439	-0.0131981
ONDER_CDH1_TARGETS_1_UP	0.056604	0.0183674	0.961658	0.0606429	-0.0276103	0.788091	0.054869	-0.0375358	0.695058	0.972641	-0.0155929
ONDER_CDH1_TARGETS_2_DN	0.0607612	0.0964058	0.0365202	0.0595282	0.025233	0.89921	0.0690558	0.197038	6.17568e-05	0.000202854	0.106226
ONDER_CDH1_TARGETS_2_UP	0.0531935	-0.0517511	0.445372	0.0604926	0.024327	0.990599	0.0509991	-0.09493	0.144608	0.480968	-0.0407847
ONDER_CDH1_TARGETS_3_DN	0.104852	-0.11709	0.138483	0.117952	0.0527488	0.969924	0.111571	-0.0147697	0.858416	0.6334	-0.0263702
ONGUSAHA_TP53_TARGETS	0.0463185	-0.191496	0.175954	0.0595103	0.290472	0.96293	0.0566233	0.160259	0.159678	0.300998	0.0864118
ONKEN_UVEAL_MELANOMA_DN	0.145546	-0.0292796	0.00299941	0.145994	-0.0310565	0.85348	0.14876	0.00393988	0.952833	0.0612548	-0.0187987
ONKEN_UVEAL_MELANOMA_UP	0.142874	-0.0135802	0.337843	0.139365	-0.00509981	0.995531	0.143347	-0.0200174	0.541284	0.756308	-0.0128991
ONO_AML1_TARGETS_DN	0.0417639	-0.0648369	0.0366167	0.0458481	-0.0648511	0.702002	0.0398442	-0.162257	0.0477944	0.0370529	-0.097315
ONO_AML1_TARGETS_UP	0.125925	-0.0363365	0.000707803	0.122556	-0.0531292	0.689164	0.125453	-0.0336441	0.187501	0.00489692	-0.0410366
ONO_FOXP3_TARGETS_DN	0.0313021	-0.0864933	0.323096	0.0325854	0.0891378	0.925979	0.0311646	-0.0520885	0.464892	0.684076	-0.0164813
ONO_FOXP3_TARGETS_UP	0.125878	-0.0322972	0.000588682	0.122556	-0.0513417	0.779593	0.125453	-0.0324054	0.212301	0.00515332	-0.0386814
OSADA_ASCL1_TARGETS_DN	0.0802426	-0.111989	0.0629336	0.0559668	-0.466611	0.176323	0.0893927	0.00124495	0.469116	0.104536	-0.192452
OSADA_ASCL1_TARGETS_UP	0.0258452	0.0304771	0.790258	0.0302806	0.171275	0.92906	0.0284942	0.0267173	0.598979	0.949435	0.0761565
OSMAN_BLADDER_CANCER_DN	0.172994	-0.033064	4.41472e-05	0.17703	0.000318497	1	0.1733	-0.00593641	0.311491	0.00102931	-0.012894
OSMAN_BLADDER_CANCER_UP	0.117146	0.00623313	0.781443	0.108359	-0.000139787	0.999371	0.118649	0.000268132	0.799014	0.987673	0.00212049
OSWALD_HEMATOPOIETIC_STEM_CELL_IN_COLLAGEN_GEL_DN	0.101306	-0.0267309	0.164062	0.0981009	-0.0115311	0.999371	0.106557	-0.0104673	0.939532	0.711673	-0.0162431
OSWALD_HEMATOPOIETIC_STEM_CELL_IN_COLLAGEN_GEL_UP	0.123492	-0.111167	8.98914e-05	0.109589	-0.168477	0.733064	0.120308	-0.145583	0.0964712	0.000537541	-0.141742
OUELLET_CULTURED_OVARIAN_CANCER_INVASIVE_VS_LMP_DN	0.0356442	-0.0942599	0.308687	0.0404095	-0.0979104	0.641931	0.0221025	-0.339638	0.0444799	0.149172	-0.177269
OUELLET_CULTURED_OVARIAN_CANCER_INVASIVE_VS_LMP_UP	0.175007	0.0232069	0.0514603	0.174186	0.0617767	0.900572	0.177672	0.0310128	0.15003	0.127323	0.0386655
OUELLET_OVARIAN_CANCER_INVASIVE_VS_LMP_UP	0.316694	0.0234267	0.640298	0.294715	-0.0227486	0.981018	0.301429	-0.0220405	0.585092	0.91952	-0.00712083
OUILLETTE_CLL_13Q14_DELETION_DN	0.00944031	-0.219394	0.164524	0.0159237	-0.0590677	1	0.0143663	-0.00550123	0.938369	0.712268	-0.0946542
OUILLETTE_CLL_13Q14_DELETION_UP	0.0438983	-0.084306	0.02655	0.0460127	0.00103357	0.969924	0.0435633	-0.138297	0.00120763	0.00202864	-0.0738565
OUYANG_PROSTATE_CANCER_PROGRESSION_UP	0.170937	-0.0770867	0.021293	0.161209	-0.0813304	0.689164	0.177549	-0.0402958	0.805943	0.180743	-0.0662376
OZEN_MIR125B1_TARGETS	0.0259628	0.171676	0.176456	0.0215228	-0.190533	0.793322	0.02453	0.0986761	0.519293	0.513046	0.0266064
PACHER_TARGETS_OF_IGF1_AND_IGF2_UP	0.0644489	-0.0748032	0.451755	0.0735838	0.0686324	0.969924	0.0611984	-0.0372985	0.878025	0.927746	-0.0144898
PAL_PRMT5_TARGETS_UP	0.148858	-0.00811452	0.629264	0.125914	-0.0359855	0.981018	0.141156	-0.0401488	0.674959	0.941121	-0.0280829
PANGAS_TUMOR_SUPPRESSION_BY_SMAD1_AND_SMAD5_DN	0.0554639	-0.039258	0.374383	0.057686	0.0311711	0.951832	0.0601652	0.0589864	0.132901	0.412084	0.0169665
PANGAS_TUMOR_SUPPRESSION_BY_SMAD1_AND_SMAD5_UP	0.0545519	-0.0208363	0.351551	0.0531841	-0.0329765	0.969924	0.0538504	-0.0072381	0.578558	0.777358	-0.0203503
PAPASPYRIDONOS_UNSTABLE_ATEROSCLEROTIC_PLAQUE_DN	0.0714312	0.0437926	0.713474	0.0781683	0.145851	0.853158	0.0803864	0.137997	0.0980881	0.4651	0.109214
PAPASPYRIDONOS_UNSTABLE_ATEROSCLEROTIC_PLAQUE_UP	0.0853789	-0.149783	0.00541505	0.0929	-0.0480598	0.942489	0.0896389	-0.0483353	0.90977	0.0965934	-0.0820593
PARENT_MTOR_SIGNALING_DN	0.0715957	0.097717	0.0507264	0.0592574	-0.10343	0.916873	0.0680659	0.0479088	0.497193	0.274289	0.0140654
PARENT_MTOR_SIGNALING_UP	0.0649976	-0.0191909	0.486127	0.0658995	0.0319379	0.980188	0.0665914	-0.00951932	0.881601	0.942417	0.00107589
PARK_APL_PATHOGENESIS_DN	0.109821	-0.105277	0.0565246	0.131207	0.0157865	0.96293	0.115564	-0.000693056	0.838027	0.403862	-0.0300611
PARK_HSC_AND_MULTIPOTENT_PROGENITORS	0.193358	0.0179719	0.576649	0.188927	0.0349332	0.990281	0.191175	-0.00531763	0.741186	0.943599	0.0158625
PARK_HSC_MARKERS	0.138211	-0.168121	0.000509382	0.126785	-0.0298822	0.969924	0.152988	-0.0633756	0.842915	0.0162737	-0.0871262
PARK_TRETINOIN_RESPONSE_AND_PML_RARA_FUSION	0.134121	-0.181612	0.00020467	0.14461	-0.0659271	0.702002	0.137849	-0.0648045	0.347183	0.0029914	-0.104115
PARK_TRETINOIN_RESPONSE_AND_RARA_PLZF_FUSION	0.0675757	-0.167982	0.0492054	0.0667097	-0.129215	0.753537	0.0816513	0.0871499	0.577715	0.261958	-0.0700155
PASINI_SUZ12_TARGETS_DN	0.172738	0.011117	0.942398	0.168918	-0.0398858	0.916873	0.178517	0.0307117	0.390508	0.903136	0.000647612
PASINI_SUZ12_TARGETS_UP	0.059413	0.00703797	0.905379	0.0621069	-0.0200095	0.853158	0.0519097	-0.0927909	0.279939	0.800926	-0.0352541
PASQUALUCCI_LYMPHOMA_BY_GC_STAGE_DN	0.0782026	-0.0422002	0.117931	0.0779765	-0.0296765	0.972385	0.0771922	-0.0535307	0.13004	0.209502	-0.0418024
PASQUALUCCI_LYMPHOMA_BY_GC_STAGE_UP	0.108954	0.0925738	0.00242089	0.108484	0.0523419	0.908558	0.109632	0.0624451	0.0480249	0.00549998	0.0691202
PATIL_LIVER_CANCER	0.117556	0.0308151	0.187036	0.1162	0.0446336	0.702002	0.117514	0.0249774	0.68733	0.568347	0.0334754
PEART_HDAC_PROLIFERATION_CLUSTER_DN	0.120974	0.0976228	0.00759899	0.108399	-0.00888339	0.969924	0.111637	0.0449628	0.513	0.0836874	0.0445674
PEART_HDAC_PROLIFERATION_CLUSTER_UP	0.0989517	-0.0475219	0.105269	0.0908972	-0.153853	0.668993	0.103198	0.0238867	0.991875	0.503133	-0.0591627
PECE_MAMMARY_STEM_CELL_DN	0.121147	-0.0520027	0.163004	0.109594	0.0111836	0.997643	0.131826	0.0243336	0.849821	0.682341	-0.00549515
PECE_MAMMARY_STEM_CELL_UP	0.446385	0.00604788	0.752285	0.455211	0.0157544	0.865019	0.443018	0.019016	0.304458	0.778471	0.0136061
PEDERSEN_METASTASIS_BY_ERBB2_ISOFORM_1	0.120501	-0.11151	0.0924899	0.110901	-0.068361	0.898194	0.130217	0.0183337	0.830506	0.500078	-0.0538457
PEDERSEN_METASTASIS_BY_ERBB2_ISOFORM_4	0.103819	0.180078	1.27829e-07	0.0954854	-0.0232585	0.878385	0.105012	0.173791	5.34546e-05	2.16472e-09	0.110204
PEDERSEN_METASTASIS_BY_ERBB2_ISOFORM_6	0	NA	0.0261003	0.0280437	2.50751	0.256391	0	NA	0.402506	0.0657806	NA
PEDERSEN_METASTASIS_BY_ERBB2_ISOFORM_7	0.0649974	0.0322455	0.812928	0.0606671	-0.0131293	0.991867	0.0662208	0.0482383	0.238112	0.770284	0.0224515
PEDERSEN_TARGETS_OF_611CTF_ISOFORM_OF_ERBB2	0.0603092	-0.10271	0.0214006	0.0606568	-0.0841302	0.770173	0.0668644	0.0438628	0.971279	0.219034	-0.0476591
PEDRIOLI_MIR31_TARGETS_DN	0.034724	-0.0687997	0.418456	0.0395694	-0.0478642	0.864725	0.0376827	0.0344624	0.791916	0.868506	-0.0274005
PEDRIOLI_MIR31_TARGETS_UP	0.026943	0.0229116	0.699681	0.0268932	-0.0514857	0.853158	0.0260157	0.000394592	0.987503	0.983357	-0.00939316
PELLICCIOTTA_HDAC_IN_ANTIGEN_PRESENTATION_DN	0.340074	0.0269499	0.669933	0.306551	-0.0712206	0.865019	0.318539	-0.0431086	0.207541	0.644772	-0.0291265
PELLICCIOTTA_HDAC_IN_ANTIGEN_PRESENTATION_UP	0.240733	0.038307	0.223166	0.242741	0.0293676	0.958495	0.243639	0.0154393	0.803778	0.74113	0.0277046
PEPPER_CHRONIC_LYMPHOCYTIC_LEUKEMIA_UP	0.0733125	0.163389	0.00605359	0.0828297	0.127696	0.692147	0.0599514	0.014843	0.925086	0.0851593	0.101976
PEREZ_TP53_AND_TP63_TARGETS	0.0140731	-0.149812	0.0912446	0.015628	-0.276706	0.875045	0.0161769	0.00400563	0.578802	0.406711	-0.140837
PEREZ_TP53_TARGETS	0.0301683	-0.0104591	0.995296	0.0326324	-0.0458773	0.950047	0.0306084	-0.012676	0.98637	0.999946	-0.0230042
PEREZ_TP63_TARGETS	0.0213024	-0.0998497	0.0203055	0.0255474	-0.0375336	0.887941	0.0220126	-0.0264253	0.616341	0.173615	-0.0546029
PETRETTO_CARDIAC_HYPERTROPHY	0.191723	-0.0249953	0.138653	0.194283	-0.017807	0.950047	0.194357	0.00878642	0.853742	0.626697	-0.0113386
PETRETTO_HEART_MASS_QTL_CIS_DN	0.0545639	0.0524413	0.609573	0.0479335	-0.10938	0.826428	0.0535767	0.101564	0.485644	0.831581	0.0148753
PETRETTO_HEART_MASS_QTL_CIS_UP	0.0563043	-0.0572908	0.248633	0.0524951	-0.0852525	0.969924	0.0634943	0.0681418	0.265595	0.481917	-0.0248005
PETROVA_ENDOTHELIUM_LYMPHATIC_VS_BLOOD_DN	0.098812	0.0561949	0.274742	0.0915888	-0.0556825	0.904361	0.0989451	0.0561559	0.457228	0.629418	0.0188894
PETROVA_ENDOTHELIUM_LYMPHATIC_VS_BLOOD_UP	0.0428188	0.232037	0.0436156	0.0319928	-0.0139902	0.794203	0.036875	0.106473	0.477262	0.223473	0.108173
PETROVA_PROX1_TARGETS_DN	0.0604487	0.271955	0.00021653	0.0498322	-0.0523991	0.969924	0.054384	0.211191	0.0922162	0.00136991	0.143582
PETROVA_PROX1_TARGETS_UP	0.062695	0.266828	0.256021	0.0352975	0.0578119	0.950047	0.0431831	0.151467	0.874459	0.796733	0.158702
PHONG_TNF_RESPONSE_NOT_VIA_P38	0.0821615	-0.0861794	0.0387506	0.079043	-0.0817964	0.60099	0.0847047	-0.00815429	0.933549	0.264317	-0.05871
PHONG_TNF_RESPONSE_VIA_P38_COMPLETE	0.0721032	-0.117817	0.00516403	0.0694937	-0.0618332	0.785384	0.085203	0.0615293	0.710913	0.0690639	-0.0393737
PHONG_TNF_RESPONSE_VIA_P38_PARTIAL	0.0799444	-0.118282	0.00706177	0.0779951	-0.144064	0.669949	0.0861197	0.0264993	0.946468	0.094191	-0.0786155
PHONG_TNF_TARGETS_UP	0.223829	-0.138701	0.00288842	0.197644	-0.233286	0.573548	0.233874	-0.0506478	0.64314	0.0333135	-0.140878
PICCALUGA_ANGIOIMMUNOBLASTIC_LYMPHOMA_DN	0.111267	-0.262749	4.99218e-05	0.104876	-0.251313	0.595339	0.117747	-0.123526	0.164847	0.000430989	-0.212529
PICCALUGA_ANGIOIMMUNOBLASTIC_LYMPHOMA_UP	0.0531451	-0.0475763	0.891177	0.0646314	0.0947257	0.868792	0.0528436	-0.0418856	0.874459	0.992599	0.00175456
PID_A6B1_A6B4_INTEGRIN_PATHWAY	0.193926	0.0551909	0.199674	0.190834	0.082556	0.800255	0.216394	0.151414	5.33575e-05	0.000688857	0.096387
PID_AJDISS_2PATHWAY	0.113912	0.0452174	0.274195	0.109319	0.0326216	0.969924	0.120717	0.079487	0.0843847	0.26941	0.052442
PID_ALK1_PATHWAY	0.105216	-0.0278237	0.38142	0.106135	-0.00918592	0.997638	0.0995209	-0.0707429	0.0639244	0.28269	-0.0359175
PID_ALPHA_SYNUCLEIN_PATHWAY	0.061888	-0.131583	0.00947554	0.0628752	-0.131843	0.491748	0.057232	-0.218929	0.000343909	0.000165655	-0.160785
PID_AMB2_NEUTROPHILS_PATHWAY	0.126565	0.0925523	0.362773	0.101863	-0.0811489	0.951371	0.13487	0.141863	0.0130095	0.0943699	0.0510889
PID_ANGIOPOIETIN_RECEPTOR_PATHWAY	0.0853164	-0.0492263	0.071189	0.0769184	-0.0318327	0.901015	0.0901456	0.0125713	0.88092	0.452134	-0.0228292
PID_AP1_PATHWAY	0.167724	-0.0112045	0.181016	0.141949	-0.15007	0.594192	0.163832	-0.0366658	0.465561	0.424483	-0.06598
PID_AR_NONGENOMIC_PATHWAY	0.152223	-0.0197293	0.360849	0.139008	-0.12921	0.539052	0.156224	-0.0222882	0.473026	0.573412	-0.0570758
PID_AR_PATHWAY	0.110631	-0.0499545	0.150475	0.112494	0.0482436	0.950047	0.118057	-0.0165358	0.795998	0.629864	-0.00608224
PID_AR_TF_PATHWAY	0.0867211	-0.0982635	0.00137344	0.0859087	-0.0533233	0.513941	0.0912087	-0.0464454	0.126615	0.0048064	-0.0660107
PID_ARF6_PATHWAY	0.00996755	-0.253855	0.200509	0.0156362	-0.142444	0.969924	0.0138661	0.353515	0.240222	0.409088	-0.0142614
PID_ARF6_TRAFFICKING_PATHWAY	0.115349	0.0557358	0.175954	0.112583	0.12138	0.689164	0.128923	0.118274	0.0187354	0.0581916	0.0984631
PID_ATF2_PATHWAY	0.145646	-0.047001	0.0733208	0.138778	-0.104927	0.599439	0.146201	-0.0111947	0.463425	0.254084	-0.0543742
PID_ATM_PATHWAY	0.0478568	-0.168622	0.05555	0.0489719	0.00392324	0.969924	0.0511714	-0.0997279	0.190169	0.164686	-0.0881423
PID_ATR_PATHWAY	0.0602641	-0.120507	0.105834	0.0620142	0.0484908	0.936688	0.0593456	-0.0866607	0.331683	0.336881	-0.0528923
PID_AURORA_A_PATHWAY	0.118212	0.0588348	0.621388	0.10088	-0.0454725	0.751363	0.112377	-0.000148632	0.807872	0.924236	0.00440456
PID_AURORA_B_PATHWAY	0.182272	0.12478	0.18328	0.14701	0.00732455	0.969924	0.166609	0.0171812	0.983265	0.745524	0.0497618
PID_AVB3_INTEGRIN_PATHWAY	0.0841201	0.0704959	0.0929886	0.0849483	0.00908329	0.969924	0.0877073	0.0924738	0.0918214	0.143135	0.057351
PID_AVB3_OPN_PATHWAY	0.259466	0.0122043	0.987995	0.20803	-0.17034	0.492361	0.267435	0.060507	0.237916	0.634411	-0.0325427
PID_BARD1_PATHWAY	0.0844578	0.0127888	0.512579	0.0789832	-0.0443799	0.880443	0.083404	-0.00266508	0.849821	0.927196	-0.0114187
PID_BCR_5PATHWAY	0.0796573	-0.112843	0.000439118	0.0709853	-0.164296	0.575593	0.0835347	-0.0654577	0.199968	0.00302373	-0.114199
PID_BETA_CATENIN_NUC_PATHWAY	0.144243	-0.0365518	0.105962	0.13764	-0.0297375	0.969924	0.151144	0.0174117	0.861032	0.563233	-0.0162925
PID_BMP_PATHWAY	0.0385969	-0.00360945	0.305873	0.039293	-0.0447383	0.968608	0.0404726	-0.0140618	0.913038	0.855391	-0.0208032
PID_CASPASE_PATHWAY	0.131248	-0.00303843	0.724115	0.123427	-0.0313202	0.929865	0.127854	-0.0395506	0.572475	0.928084	-0.0246364
PID_CD40_PATHWAY	0.0923816	-0.148165	0.00095658	0.0719926	-0.276199	0.450607	0.0971634	-0.0774776	0.801889	0.0140787	-0.167281
PID_CD8_TCR_DOWNSTREAM_PATHWAY	0.101561	-0.110414	8.91839e-05	0.0959546	-0.15342	0.603994	0.102313	-0.0840982	0.0323123	0.000177871	-0.115978
PID_CD8_TCR_PATHWAY	0.0501879	0.0690165	0.22052	0.051513	0.142794	0.669949	0.0498312	0.0131551	0.655125	0.586712	0.0749887
PID_CDC42_PATHWAY	0.150567	-0.0023129	0.658969	0.138929	-0.0738806	0.730816	0.158339	0.0491076	0.0867337	0.385023	-0.00902863
PID_CDC42_REG_PATHWAY	0.0859914	0.0202288	0.715144	0.0819804	0.0240083	0.963657	0.0856561	0.0180606	0.231857	0.72152	0.0207659
PID_CERAMIDE_PATHWAY	0.101257	-0.103848	0.00262275	0.0881983	-0.184755	0.492361	0.113237	0.0477374	0.319019	0.0161375	-0.0802884
PID_CMYB_PATHWAY	0.104621	-0.0957787	0.000365092	0.102548	-0.0253246	0.947863	0.115324	0.00258388	0.925086	0.0132606	-0.0395065
PID_CXCR3_PATHWAY	0.0787665	-0.017341	0.833157	0.0721332	-0.0576821	0.831761	0.0873559	0.057449	0.685994	0.960337	-0.00585808
PID_CXCR4_PATHWAY	0.108514	0.0322361	0.0409495	0.103872	-0.0132396	0.939632	0.113971	0.0725857	0.0444799	0.0473417	0.0305274
PID_DELTA_NP63_PATHWAY	0.0898665	0.0145222	0.219151	0.0818746	0.0273282	0.950047	0.0996741	0.187808	0.000101455	0.00147249	0.0765528
PID_E2F_PATHWAY	0.0585561	0.0262076	0.556582	0.0564256	0.0654922	0.92906	0.057859	0.0841811	0.709743	0.919261	0.0586269
PID_ECADHERIN_NASCENT_AJ_PATHWAY	0.189307	0.0021671	0.500079	0.188592	0.0219734	0.981018	0.193862	0.0043038	0.563299	0.860302	0.00948145
PID_ECADHERIN_STABILIZATION_PATHWAY	0.0682042	-0.0667871	0.351551	0.063816	-0.103478	0.969924	0.077593	0.0608782	0.559484	0.768613	-0.0364623
PID_ENDOTHELIN_PATHWAY	0.108259	-0.0228533	0.0903096	0.0950518	-0.135873	0.460927	0.1084	-0.0203234	0.374137	0.215293	-0.0596832
PID_EPHA_FWDPATHWAY	0.0359822	0.00296024	0.605557	0.0351814	-0.0235705	0.969924	0.0412399	0.12949	0.119891	0.505128	0.0362934
PID_EPHB_FWD_PATHWAY	0.0996602	0.0338212	0.523111	0.0937348	0.0299485	0.942489	0.109916	0.0724724	0.510236	0.838292	0.045414
PID_EPHRINB_REV_PATHWAY	0.0235034	-0.0197083	0.939802	0.0229047	-0.0927323	0.92906	0.0238506	-0.0329364	0.994626	0.999579	-0.048459
PID_EPO_PATHWAY	0.0532782	0.0282162	0.737033	0.0488139	0.042349	0.991867	0.0603059	0.0749309	0.997735	0.995859	0.0484987
PID_ER_NONGENOMIC_PATHWAY	0.150576	0.0895187	0.0233785	0.135897	0.0494951	0.92906	0.156884	0.0879045	0.0571789	0.0373527	0.0756394
PID_ERA_GENOMIC_PATHWAY	0.137728	-0.0325834	0.0512626	0.129599	-0.121697	0.492361	0.1416	0.0104596	0.74128	0.241239	-0.0479403
PID_ERBB1_DOWNSTREAM_PATHWAY	0.176031	-0.073578	0.00268277	0.168713	-0.0985984	0.62518	0.190625	0.016142	0.883921	0.0425931	-0.0520115
PID_ERBB1_INTERNALIZATION_PATHWAY	0.0728738	0.084361	0.18277	0.0768473	0.0322579	0.969924	0.0724468	0.00765542	0.834055	0.700609	0.0414248
PID_ERBB1_RECEPTOR_PROXIMAL_PATHWAY	0.0775141	0.0620547	0.0706604	0.0658619	0	0.972385	0.0847263	0.0595689	0.415508	0.310591	0.0405412
PID_ERBB2_ERBB3_PATHWAY	0.113115	-0.0782137	0.0213579	0.106235	-0.0799706	0.647388	0.12105	-0.0176291	0.84838	0.179793	-0.0586045
PID_ERBB4_PATHWAY	0.0587849	-0.115331	0.058419	0.0574893	0.0220039	0.901015	0.0647987	0.0151477	0.824444	0.393123	-0.0260599
PID_FAK_PATHWAY	0.121621	-0.0335385	0.615555	0.117351	0.00842572	0.954779	0.132186	0.0300114	0.763268	0.95234	0.00163285
PID_FANCONI_PATHWAY	0.0126368	-0.132307	0.521285	0.0112407	-0.0917088	0.991867	0.0125337	0.178626	0.745411	0.92806	-0.0151302
PID_FAS_PATHWAY	0.0562904	-0.0554203	0.348124	0.0494354	-0.0458213	0.870683	0.0659396	0.113275	0.0963761	0.314756	0.00401125
PID_FCER1_PATHWAY	0.0763515	-0.0784918	0.0133957	0.064307	-0.150816	0.286316	0.0819862	-0.00324371	0.735126	0.0679689	-0.0775171
PID_FGF_PATHWAY	0.0852456	0.0231497	0.315327	0.085029	-0.0709708	0.733064	0.0843728	0.0318299	0.373447	0.556793	-0.00533042
PID_FOXM1_PATHWAY	0.109545	0.110583	0.329832	0.0850253	-0.0936835	0.853158	0.0980779	0.00199248	0.815991	0.816007	0.00629739
PID_FOXO_PATHWAY	0.153412	-0.10982	0.000412595	0.152713	-0.0524059	0.999371	0.16594	-0.00612638	0.859324	0.0143536	-0.0561173
PID_FRA_PATHWAY	0.154997	-0.0211725	0.434533	0.143298	-0.0755669	0.916873	0.171134	0.138123	0.422512	0.735488	0.0137946
PID_GLYPICAN_1PATHWAY	0.0320943	0.207506	0.29475	0.0401526	0.133025	0.969924	0.0353121	0.178949	0.145648	0.384361	0.17316
PID_GMCSF_PATHWAY	0.0960088	-0.0468839	0.0976273	0.0854991	-0.114887	0.75977	0.0994702	-0.0125659	0.925086	0.498732	-0.0581123
PID_HDAC_CLASSI_PATHWAY	0.102156	-0.163224	1.60226e-07	0.0989043	-0.04859	0.802514	0.107516	-0.0609539	0.238112	5.14298e-06	-0.0909228
PID_HDAC_CLASSII_PATHWAY	0.107646	-0.050481	0.0285657	0.116378	0.0118592	0.969924	0.103858	-0.100428	0.0256879	0.0245639	-0.04635
PID_HDAC_CLASSIII_PATHWAY	0.0614983	-0.0335865	0.613764	0.0627893	-0.0385503	0.928654	0.0546021	-0.0761622	0.483481	0.859659	-0.049433
PID_HEDGEHOG_GLI_PATHWAY	0.123192	-0.0299458	0.315377	0.124294	-0.0242025	0.969924	0.123371	-0.014984	0.866206	0.85058	-0.0230441
PID_HES_HEY_PATHWAY	0.0563625	-0.235918	0.00130553	0.0518752	-0.200466	0.787414	0.0650286	-0.040472	0.78785	0.027096	-0.158952
PID_HIF1_TFPATHWAY	0.172758	-0.0561734	0.112988	0.180499	-0.0104686	0.836091	0.182354	-0.0013261	0.865389	0.542771	-0.022656
PID_HIF2PATHWAY	0.142651	-0.0868618	0.032895	0.150645	-0.0219885	0.770694	0.151655	0.0140174	0.75735	0.245097	-0.0316109
PID_HIV_NEF_PATHWAY	0.0670588	-0.111561	0.00896079	0.0557647	-0.247245	0.770694	0.0757238	0.0727496	0.463938	0.074449	-0.0953521
PID_HNF3A_PATHWAY	0.12036	-0.186525	2.02037e-06	0.124486	-0.16261	0.643123	0.129715	-0.105406	0.1733	3.00497e-05	-0.151514
PID_HNF3B_PATHWAY	0.0413299	-0.173754	0.167578	0.0412105	-0.144607	0.573548	0.0531369	0.231415	0.059701	0.111759	-0.0289818
PID_IFNG_PATHWAY	0.0747253	-0.168775	0.0979772	0.0798445	-0.0611584	0.760982	0.0804074	-0.0460642	0.634664	0.4119	-0.0919991
PID_IGF1_PATHWAY	0.128886	-0.0164187	0.363278	0.12844	0.00572028	0.955667	0.12989	-0.0160202	0.779444	0.855473	-0.00890623
PID_IL1_PATHWAY	0.0788026	-0.086657	0.0937802	0.066496	-0.171575	0.609487	0.0816159	0.00149077	0.981881	0.450553	-0.0855804
PID_IL12_2PATHWAY	0.0530458	-0.169672	0.0103308	0.0458232	-0.300701	0.363564	0.06183	0.0911847	0.693103	0.064191	-0.126396
PID_IL12_STAT4_PATHWAY	0.074133	-0.124076	0.00356276	0.0726311	-0.204342	0.451646	0.0760161	-0.111315	0.1281	0.00937915	-0.146578
PID_IL2_1PATHWAY	0.0848479	-0.0797023	0.0248268	0.0798404	-0.0796856	0.643123	0.0890965	-0.0334294	0.393387	0.118862	-0.0642724
PID_IL2_PI3K_PATHWAY	0.108722	-0.10855	0.000226105	0.104452	0.0352601	0.975393	0.121276	0.0412516	0.522055	0.0058945	-0.0106795
PID_IL2_STAT5_PATHWAY	0.0181081	-0.294362	0.166673	0.0203774	0.0966111	0.990599	0.0210027	0.0995925	0.956592	0.718396	-0.0327195
PID_IL23_PATHWAY	0.0790028	-0.0364778	0.369627	0.0635036	-0.136263	0.643123	0.094049	0.165245	0.0697968	0.223975	-0.00249833
PID_IL27_PATHWAY	0.0266574	-0.2839	0.10205	0.0205132	-0.635757	0.450607	0.0320388	-0.0345572	0.621323	0.310729	-0.318071
PID_IL3_PATHWAY	0.110774	-0.100964	0.106845	0.112926	-0.0134068	0.950047	0.120624	0.0133624	0.900309	0.571633	-0.0336696
PID_IL4_2PATHWAY	0.0299895	-0.272988	0.000175902	0.0312292	-0.247869	0.351658	0.0335514	-0.0346849	0.674959	0.00258544	-0.185181
PID_IL6_7_PATHWAY	0.15878	-0.0702218	0.0157898	0.152895	-0.0902586	0.37259	0.161278	-0.0421035	0.282606	0.0463458	-0.067528
PID_IL8_CXCR1_PATHWAY	0.0722364	0.0152231	0.935123	0.0692035	-0.0564805	0.949286	0.0728661	0.0347654	0.993701	0.9997	-0.002164
PID_IL8_CXCR2_PATHWAY	0.0846399	-0.0468248	0.288802	0.0837653	-0.106993	0.689164	0.0854722	-0.0399897	0.591124	0.638838	-0.0646025
PID_ILK_PATHWAY	0.184781	-0.042696	0.00155998	0.172057	-0.0882791	0.584619	0.189065	-0.0378271	0.138468	0.00634822	-0.0562674
PID_INSULIN_GLUCOSE_PATHWAY	0.184055	-0.0732759	0.0265153	0.185745	-0.0414644	0.999267	0.205199	0.0434996	0.674959	0.234627	-0.0237469
PID_INSULIN_PATHWAY	0.0489063	0.040495	0.324751	0.0442307	-0.0500468	0.982217	0.0459083	-0.0838968	0.472151	0.705584	-0.0311496
PID_INTEGRIN_A4B1_PATHWAY	0.199511	0.0269976	0.95633	0.198424	-0.0427955	0.92401	0.194916	-0.00381118	0.930958	0.998928	-0.00653633
PID_INTEGRIN_A9B1_PATHWAY	0.160832	-0.0195588	0.7034	0.157236	-0.043209	0.983775	0.150722	-0.0709422	0.662801	0.955484	-0.04457
PID_INTEGRIN_CS_PATHWAY	0.0650269	0.167931	0.0185001	0.0645514	0.093435	0.864725	0.0776981	0.274919	0.000532562	0.000688425	0.178761
PID_INTEGRIN1_PATHWAY	0.112807	0.141959	0.0377916	0.0992046	-0.0515491	0.971552	0.124511	0.216377	5.34546e-05	0.000197222	0.102262
PID_INTEGRIN2_PATHWAY	0.0399424	0.209122	0.326726	0.0357133	-0.0282838	0.831443	0.0354332	0.2626	0.213583	0.458336	0.147813
PID_INTEGRIN3_PATHWAY	0.149303	0.149255	0.00666119	0.147543	0.0836656	0.779593	0.146497	0.0568856	0.0318771	0.00788064	0.0966021
PID_KIT_PATHWAY	0.0393634	-0.0486532	0.368735	0.0331584	-0.20084	0.793322	0.0419028	0.0400503	0.74876	0.804179	-0.0698142
PID_LIS1_PATHWAY	0.2081	-0.0583608	0.000276993	0.209538	-0.00910382	0.969924	0.216864	-0.0377665	0.147201	0.00247279	-0.035077
PID_LKB1_PATHWAY	0.133952	-0.085904	0.00336847	0.131493	-0.0992107	0.678276	0.145058	0.0161055	0.992619	0.0581175	-0.0563364
PID_LYMPH_ANGIOGENESIS_PATHWAY	0.102051	0.0660062	0.363833	0.0974292	0.0202441	0.92401	0.107395	0.116529	0.0124425	0.0898253	0.067593
PID_LYSOPHOSPHOLIPID_PATHWAY	0.132817	-0.037298	0.555349	0.115798	-0.139171	0.694662	0.142459	0.0293852	0.502381	0.772741	-0.0490279
PID_MAPK_TRK_PATHWAY	0.0944704	0.0178093	0.70828	0.0910566	0.0551285	0.994256	0.102984	0.0573631	0.629369	0.950585	0.0434336
PID_MET_PATHWAY	0.0984566	-0.0635445	0.0618507	0.0957983	-0.0436623	0.760982	0.102637	0.00951603	0.899603	0.387895	-0.0325636
PID_MTOR_4PATHWAY	0.177006	-0.0370926	0.0201665	0.176441	-0.00959846	0.951832	0.17877	-0.0142514	0.729409	0.201324	-0.0203142
PID_MYC_ACTIV_PATHWAY	0.194618	0.0126328	0.841042	0.169512	-0.0964337	0.910901	0.194486	0.030541	0.797804	0.986187	-0.0177533
PID_MYC_PATHWAY	0.0838336	-0.0290912	0.85324	0.0782972	-0.00857801	0.972385	0.0867953	0.0482522	0.836355	0.993801	0.00352763
PID_MYC_REPRESS_PATHWAY	0.111127	0.0184973	0.794565	0.114812	0.102184	0.598862	0.115362	0.0760042	0.220329	0.607921	0.065562
PID_NCADHERIN_PATHWAY	0.154251	0.056223	0.151224	0.139501	-0.0170544	0.980188	0.162187	0.0763639	0.115828	0.228782	0.0385108
PID_NECTIN_PATHWAY	0.130798	0.0489668	0.905115	0.117541	-0.0370374	0.972385	0.13947	0.0311128	0.498356	0.949044	0.0143474
PID_NEPHRIN_NEPH1_PATHWAY	0.0728262	-0.0326559	0.185859	0.0650689	-0.129547	0.760982	0.0724557	-0.0697525	0.333506	0.4112	-0.0773185
PID_NETRIN_PATHWAY	0.112029	-0.075227	0.0118219	0.110818	-0.0398635	0.853158	0.121612	0.0173901	0.991875	0.162132	-0.0325668
PID_NFAT_3PATHWAY	0.124941	-0.0835806	0.00680523	0.127953	-0.0631066	0.754185	0.134982	0.00821405	0.984937	0.102444	-0.0461577
PID_NFAT_TFPATHWAY	0.131995	-0.126723	0.000134667	0.115777	-0.244119	0.406939	0.131068	-0.108693	0.160838	0.000708427	-0.159845
PID_NFKAPPAB_CANONICAL_PATHWAY	0.104371	-0.253427	0.000107302	0.0946563	-0.214555	0.609919	0.117706	-0.0775759	0.57329	0.00236804	-0.181852
PID_NOTCH_PATHWAY	0.0793025	-0.0667518	0.419825	0.076586	-0.0789206	0.834828	0.0895924	0.080732	0.260642	0.571525	-0.0216468
PID_P38_ALPHA_BETA_DOWNSTREAM_PATHWAY	0.117183	-0.00309158	0.861199	0.11086	-0.081693	0.793322	0.110937	-0.0495591	0.877961	0.984756	-0.0447812
PID_P38_ALPHA_BETA_PATHWAY	0.0906849	-0.0728001	0.245938	0.0840637	-0.121896	0.542577	0.104693	0.0935495	0.617596	0.544834	-0.0337156
PID_P38_MKK3_6PATHWAY	0.0859085	-0.0148303	0.594574	0.0912067	0.0518175	0.980581	0.0816366	-0.0679829	0.608433	0.912885	-0.0103319
PID_P53_DOWNSTREAM_PATHWAY	0.086263	-0.0469272	0.131063	0.0809598	-0.0813087	0.705489	0.0850686	-0.0411166	0.972594	0.567429	-0.0564508
PID_P53_REGULATION_PATHWAY	0.117089	-0.0286342	0.0587723	0.111286	-0.0252561	0.831443	0.122277	0.0140252	0.817009	0.375583	-0.0132883
PID_P73PATHWAY	0.0720625	-0.00266954	0.7034	0.0669145	-0.0327183	0.837208	0.0723295	0.00743511	0.992619	0.982657	-0.00931759
PID_P75_NTR_PATHWAY	0.13009	-0.0131606	0.848974	0.128315	-0.0574735	0.781501	0.129276	-0.00660755	0.828552	0.977048	-0.0257472
PID_PDGFRA_PATHWAY	0.0907862	-0.0918643	0.000496943	0.0888405	-0.0432577	0.62518	0.0941169	-0.0530992	0.259461	0.00442138	-0.0627404
PID_PDGFRB_PATHWAY	0.142324	-0.0309103	0.102026	0.133952	-0.0991515	0.733064	0.147404	-0.000581615	0.99895	0.519912	-0.0435478
PID_PI3K_PLC_TRK_PATHWAY	0.180217	-0.0415746	0.184046	0.180594	0.00381708	0.976212	0.20161	0.0644473	0.497193	0.565684	0.00889659
PID_PI3KCI_AKT_PATHWAY	0.137807	-0.0518921	0.0297536	0.137649	-0.0331869	0.943116	0.149766	0.0400331	0.591124	0.223939	-0.0150153
PID_PI3KCI_PATHWAY	0.0963454	0.0171814	0.968202	0.09536	-0.00796036	0.985554	0.0980292	-0.00956034	0.862825	0.998941	-0.000113098
PID_PLK1_PATHWAY	0.0921737	-0.0212895	0.627867	0.0850316	-0.0387856	0.93604	0.0865348	-0.0867786	0.263917	0.713524	-0.0489512
PID_PRL_SIGNALING_EVENTS_PATHWAY	0.252732	-0.0208792	0.191932	0.242073	-0.0442605	0.901015	0.250213	-0.0103121	0.743487	0.662807	-0.0251506
PID_PS1_PATHWAY	0.117761	-0.0974155	0.0204339	0.114025	-0.114937	0.733064	0.130017	0.0215497	0.859734	0.190896	-0.0636008
PID_PTP1B_PATHWAY	0.074604	-0.0296375	0.244683	0.0736621	-0.0903291	0.406939	0.0778507	0.00742429	0.934393	0.576322	-0.0375141
PID_RAC1_PATHWAY	0.188402	0.0269727	0.812191	0.169547	-0.055492	0.740481	0.199974	0.0776256	0.0314572	0.242889	0.0163688
PID_RAC1_REG_PATHWAY	0.0524072	0.0195614	0.954478	0.050431	0.0811167	0.991867	0.0535459	0.105434	0.188935	0.75164	0.0687039
PID_RAS_PATHWAY	0.101568	0.0335506	0.126945	0.1017	0.0814035	0.854889	0.112835	0.0942529	0.284477	0.324956	0.0697357
PID_RB_1PATHWAY	0.0860541	-0.116917	0.000190644	0.0817024	-0.0932746	0.619305	0.0885752	-0.0586086	0.170889	0.00141738	-0.0895999
PID_REELIN_PATHWAY	0.124363	0.0121223	0.819915	0.12495	0.050472	0.991867	0.135249	0.0576313	0.055983	0.403456	0.0400752
PID_REG_GR_PATHWAY	0.100292	-0.142936	5.98178e-05	0.0916136	-0.178082	0.523277	0.106115	-0.0718303	0.428538	0.00100811	-0.130949
PID_RET_PATHWAY	0.0959528	0.0623119	0.195625	0.0879657	-0.0281496	0.901614	0.0921111	-0.045047	0.119891	0.259924	-0.00362823
PID_RETINOIC_ACID_PATHWAY	0.0273962	-0.138097	0.250243	0.0338052	-0.00686119	0.991867	0.0287599	-0.11586	0.954016	0.823612	-0.0869393
PID_RHOA_PATHWAY	0.201397	-0.0362462	0.276432	0.180187	-0.0717913	0.84238	0.214643	0.0127269	0.828759	0.77163	-0.0317702
PID_RHOA_REG_PATHWAY	0.0407742	0.0737052	0.0361334	0.0386641	0.00950317	0.985168	0.0448199	0.103737	0.0262439	0.0301814	0.062315
PID_RXR_VDR_PATHWAY	0.00679442	-1.36541	7.26912e-06	0.019163	-0.38929	0.789028	0.011088	-0.537134	0.059643	4.33482e-05	-0.763945
PID_S1P_S1P1_PATHWAY	0.135206	-0.00105524	0.954478	0.127737	-0.0774045	0.628559	0.143319	0.0444979	0.862825	0.970717	-0.0113206
PID_S1P_S1P2_PATHWAY	0.18485	-0.0408053	0.0430403	0.175706	-0.0804679	0.513941	0.186236	-0.0478628	0.112771	0.062252	-0.0563786
PID_S1P_S1P3_PATHWAY	0.117159	-0.00776422	0.933083	0.110205	-0.0390634	0.791716	0.124486	0.041685	0.334241	0.833811	-0.00171421
PID_SHP2_PATHWAY	0.0559061	-0.0291011	0.228351	0.0596615	0.149449	0.92906	0.0588103	-0.011927	0.906852	0.770823	0.0361404
PID_SMAD2_3NUCLEAR_PATHWAY	0.119763	-0.104095	0.00274127	0.124665	-0.0571753	0.775007	0.1198	-0.0656374	0.343584	0.0250408	-0.075636
PID_SYNDECAN_1_PATHWAY	0.0748432	0.0324444	0.211514	0.077771	0.0108712	0.950047	0.0880098	0.181668	0.0156268	0.073393	0.0749944
PID_SYNDECAN_2_PATHWAY	0.209913	0.00958399	0.910581	0.211953	0.0599749	0.991867	0.220673	0.0439705	0.731026	0.991237	0.0378431
PID_SYNDECAN_4_PATHWAY	0.176489	0.0687993	0.0350572	0.174555	0.0956184	0.569709	0.182377	0.103555	0.0600795	0.0364079	0.0893241
PID_TAP63_PATHWAY	0.063869	0.0445997	0.374158	0.0643205	0.0632694	0.908558	0.0652598	0.0583103	0.363428	0.652022	0.0553931
PID_TCPTP_PATHWAY	0.0519186	0.0409864	0.960236	0.0464163	-0.0570105	0.86058	0.0554138	0.107528	0.497193	0.938861	0.0305015
PID_TCR_CALCIUM_PATHWAY	0.139474	-0.134322	0.000110978	0.131223	-0.202782	0.428267	0.132161	-0.167366	0.00232649	1.60662e-05	-0.168157
PID_TCR_PATHWAY	0.0468801	0.0326196	0.421359	0.0471804	0.0648392	0.901614	0.0486647	0.00808423	0.83937	0.891619	0.035181
PID_TELOMERASE_PATHWAY	0.12911	-0.0644048	0.000538843	0.126051	-0.0825028	0.573548	0.129078	-0.0490724	0.0991026	0.00200328	-0.0653267
PID_TGFBR_PATHWAY	0.120172	-0.0551065	0.0071656	0.12234	-0.0272487	0.994161	0.126072	0.0138843	0.670706	0.0985287	-0.0228236
PID_THROMBIN_PAR1_PATHWAY	0.0968077	0.0301393	0.438741	0.0899065	-0.0482254	0.857802	0.0996894	0.0368834	0.640551	0.827997	0.00626578
PID_TNF_PATHWAY	0.0857387	-0.156722	0.00299941	0.0802762	-0.194352	0.608484	0.0961204	-0.0100965	0.680554	0.0373561	-0.12039
PID_TOLL_ENDOGENOUS_PATHWAY	0.117927	0.00463021	0.703543	0.114006	-0.0132877	0.969924	0.113676	-0.0117414	0.47795	0.896271	-0.00679963
PID_TRAIL_PATHWAY	0.0119934	0.485748	0.0341927	0.014875	0.252463	0.982904	0.0103525	0.106057	0.812764	0.302693	0.281423
PID_TRKR_PATHWAY	0.106113	0.0290019	0.468654	0.102943	-0.00776765	0.96293	0.111934	0.0564327	0.325031	0.698454	0.025889
PID_TXA2PATHWAY	0.077665	0.0145541	0.632303	0.0749102	-0.0513673	0.815225	0.0760134	-0.00812718	0.693894	0.914455	-0.0149801
PID_UPA_UPAR_PATHWAY	0.134781	0.102435	0.0024124	0.126097	0.0454806	1	0.136943	0.115571	0.0271488	0.00373552	0.0878289
PID_VEGFR1_2_PATHWAY	0.114351	-0.0425659	0.28774	0.105502	-0.0621963	0.901015	0.124518	0.0412923	0.340642	0.562708	-0.0211566
PID_VEGFR1_PATHWAY	0.0639659	0.000977546	0.899974	0.0432409	-0.415037	0.647388	0.0763143	0.0982881	0.518444	0.880111	-0.105257
PID_WNT_NONCANONICAL_PATHWAY	0.102429	0.0419102	0.263199	0.0916102	-0.0308012	0.904361	0.104818	0.0340363	0.541262	0.663356	0.0150484
PID_WNT_SIGNALING_PATHWAY	0.0421836	-0.000912232	0.69168	0.0366739	-0.254789	0.558437	0.0433576	0	0.586271	0.812548	-0.0852337
PILON_KLF1_TARGETS_UP	0.056987	-0.0306547	0.458348	0.0597783	0.0413885	0.853158	0.057496	-0.051006	0.82704	0.894541	-0.0134241
PIONTEK_PKD1_TARGETS_UP	0.0456646	-0.115313	0.410528	0.0350292	-0.219374	0.976404	0.0509533	0.152307	0.234836	0.57939	-0.0607932
PLASARI_NFIC_TARGETS_BASAL_UP	0.0378683	0.115661	0.119599	0.0476603	0.271453	0.62446	0.0355286	0.0296252	0.577565	0.391839	0.138913
PLASARI_TGFB1_SIGNALING_VIA_NFIC_10HR_DN	0.0147274	-0.446787	8.81806e-05	0.0177089	-0.240525	0.887941	0.0162953	-0.33822	0.35835	0.00186334	-0.341844
PLASARI_TGFB1_SIGNALING_VIA_NFIC_10HR_UP	0.0183289	0.0868193	0.98579	0.0171216	-0.211686	0.884332	0.0146774	-0.368404	0.345771	0.879657	-0.164424
PLASARI_TGFB1_SIGNALING_VIA_NFIC_1HR_DN	0.0805857	-0.0360087	0.375154	0.074609	0.0431729	0.946308	0.0894137	-0.000895954	0.85056	0.880036	0.00208941
PLASARI_TGFB1_SIGNALING_VIA_NFIC_1HR_UP	0.0309135	-0.156535	0.137879	0.0301841	-0.100974	0.969924	0.0485122	0.271183	0.00735744	0.0313818	0.00455824
PLASARI_TGFB1_TARGETS_10HR_DN	0.0318655	-0.152814	0.0283109	0.03302	-0.0711069	0.954779	0.0353245	0.030763	0.922996	0.286974	-0.0643861
[truncated: 1,836 more rows]

## Sheet: Clone350_AUCell_by_expt
geneset	median.Veh_ExptC	enrichment.Veh_ExptC	adj.p.Veh_ExptC	median.Veh_ExptD	enrichment.Veh_ExptD	adj.p.Veh_ExptD	median.Veh_ExptA	enrichment.Veh_ExptA	adj.p.Veh_ExptA	median.Veh_ExptB	enrichment.Veh_ExptB	adj.p.Veh_ExptB	fisher.combined.pvalue	mean.enrichment
ABBUD_LIF_SIGNALING_1_DN	0.0909879	-0.0415323	0.634611	0.0985269	0.0693112	0.744247	0.090699	-0.0635909	0.220688	0.0937175	0.038985	0.999279	0.807056	0.000793264
ABBUD_LIF_SIGNALING_1_UP	0.121855	0.108285	0.302643	0.127161	0.00869438	0.963138	0.112861	0.0198819	0.994055	0.125367	-0.0157777	0.999279	0.962708	0.0302708
ABE_INNER_EAR	0.256555	0.00539265	0.504399	0.272518	-0.0353917	0.689047	0.252253	-0.016221	0.524483	0.27071	-0.00025761	0.999279	0.906377	-0.0116194
ABE_VEGFA_TARGETS_2HR	0.0598874	-0.0605293	0.683024	0.0553875	0.0273814	0.825292	0.0601974	0.0656436	0.743826	0.0622428	0.056549	0.999279	0.987976	0.0222612
ABE_VEGFA_TARGETS_30MIN	0.103378	-0.01905	0.928209	0.097041	0.0774076	0.802001	0.108354	0.0781012	0.212151	0.097668	0.0659229	0.999279	0.883735	0.0505954
ABRAHAM_ALPC_VS_MULTIPLE_MYELOMA_UP	0.118873	-0.0299447	0.743397	0.105097	0.0850172	0.750827	0.123808	-0.0040376	0.972815	0.105752	-0.045727	0.999279	0.996412	0.00132698
ABRAMSON_INTERACT_WITH_AIRE	0.18097	0.0556152	0.76041	0.139945	0.0390219	0.916726	0.179434	0.0745905	0.161971	0.147914	0.00628778	0.999279	0.822899	0.0438788
ACEVEDO_LIVER_CANCER_DN	0.108454	-0.0267812	0.36658	0.110454	4.67088e-05	0.970905	0.110128	0.0130705	0.307467	0.110451	0.00337869	0.999279	0.816756	-0.00257131
ACEVEDO_LIVER_CANCER_UP	0.120926	-0.00964426	0.775036	0.119927	-0.00846423	0.953718	0.123319	0.00442665	0.565218	0.120668	-0.00769347	0.999279	0.98781	-0.00534383
ACEVEDO_LIVER_CANCER_WITH_H3K27ME3_DN	0.0415973	-0.03874	0.273803	0.0411906	0.0221122	0.891175	0.0424107	0	0.698452	0.0399431	-0.0269413	0.999279	0.896036	-0.0108923
ACEVEDO_LIVER_CANCER_WITH_H3K27ME3_UP	0.0436713	0.028349	0.769662	0.0443638	-0.0170635	0.873919	0.042245	-0.0485218	0.0846854	0.0439483	-0.0227988	0.999279	0.6772	-0.0150088
ACEVEDO_LIVER_CANCER_WITH_H3K9ME3_DN	0.0352609	0.0752301	0.288809	0.0310574	-0.0210549	0.925122	0.0320499	-0.0350898	0.427432	0.0341889	0.00945482	0.999279	0.825122	0.00713504
ACEVEDO_LIVER_CANCER_WITH_H3K9ME3_UP	0.0171045	-0.0473985	0.770872	0.0182045	-0.0426115	0.992624	0.0166952	-0.106836	0.162295	0.0169937	-0.0664889	0.999279	0.84115	-0.0658338
ACEVEDO_LIVER_TUMOR_VS_NORMAL_ADJACENT_TISSUE_DN	0.082731	-0.0390264	0.266222	0.0811792	-0.0168445	0.959868	0.0842456	0.00312974	0.886996	0.0838196	-0.00383541	0.999279	0.936224	-0.0141441
ACEVEDO_LIVER_TUMOR_VS_NORMAL_ADJACENT_TISSUE_UP	0.157764	0.00566189	0.733029	0.155458	0.00653412	0.969288	0.157722	0.00764135	0.279922	0.15545	-0.0150243	0.999279	0.919004	0.00120325
ACEVEDO_METHYLATED_IN_LIVER_CANCER_DN	0.0428646	0.0146864	0.921368	0.0433651	-0.00729523	0.953077	0.042568	-0.0119837	0.339508	0.0431319	0.0268308	0.999279	0.965275	0.00555957
ACEVEDO_NORMAL_TISSUE_ADJACENT_TO_LIVER_TUMOR_DN	0.102834	-0.00169877	0.823105	0.101634	-0.00665556	0.932859	0.103002	0.0105634	0.496751	0.100137	-0.026191	0.999279	0.983108	-0.00599548
ACEVEDO_NORMAL_TISSUE_ADJACENT_TO_LIVER_TUMOR_UP	0.113235	-0.0203387	0.700863	0.112589	0.0135082	0.737654	0.115601	-0.0284357	0.0885893	0.110573	-0.0286529	0.999279	0.628377	-0.0159798
ACOSTA_PROLIFERATION_INDEPENDENT_MYC_TARGETS_DN	0.0820247	-0.0216722	0.828483	0.0868382	0.0475751	0.629456	0.0833823	-0.00144386	0.822048	0.0855894	0.00441229	0.999279	0.988968	0.00721784
ACOSTA_PROLIFERATION_INDEPENDENT_MYC_TARGETS_UP	0.0443842	0.0654596	0.380996	0.0431575	0.034559	0.932859	0.0421272	0.0229052	0.518972	0.042363	-0.000594558	0.999279	0.908138	0.0305823
ADDYA_ERYTHROID_DIFFERENTIATION_BY_HEMIN	0.189686	-0.0173807	0.905427	0.180262	-0.0102637	0.965068	0.18651	-0.036372	0.448453	0.184884	-0.000638946	0.999279	0.984603	-0.0161638
AFFAR_YY1_TARGETS_DN	0.0742944	0.0495265	0.794423	0.0571032	-0.046341	0.878241	0.0736762	0.112093	0.590961	0.0654755	0.044893	0.999279	0.987188	0.0400429
AFFAR_YY1_TARGETS_UP	0.0455685	-0.0932271	0.232806	0.0497447	-0.00700607	0.970905	0.0476629	0.0105834	0.942716	0.051631	-0.0113515	0.999279	0.928349	-0.0252503
AGUIRRE_PANCREATIC_CANCER_COPY_NUMBER_DN	0.0897913	-0.0657284	0.000509957	0.0922805	0.02533	0.641305	0.0928582	0.00970762	0.330411	0.0931503	0.0075441	0.999279	0.0193105	-0.00578667
AGUIRRE_PANCREATIC_CANCER_COPY_NUMBER_UP	0.099191	0.0331783	0.102585	0.0930595	0.000136483	0.992624	0.0961993	0.0114432	0.498519	0.0933353	-0.0106199	0.999279	0.651421	0.00853451
AIGNER_ZEB1_TARGETS	0.0786235	-0.0490385	0.394924	0.0838496	-0.0165829	0.927363	0.0825431	-0.0266396	0.540524	0.083228	-0.166288	0.999279	0.918348	-0.0646372
AIYAR_COBRA1_TARGETS_DN	0.148701	-0.0365633	0.33599	0.134886	-0.0210138	0.927102	0.155679	0.0322753	0.538932	0.132573	-0.0978565	0.999279	0.893649	-0.0307896
AIYAR_COBRA1_TARGETS_UP	0.140739	-0.0811846	0.0525429	0.14505	-0.0652432	0.712957	0.144634	-0.0494259	0.0352417	0.150423	0.0652531	0.999279	0.103166	-0.0326502
AKL_HTLV1_INFECTION_DN	0.0932164	-0.108405	0.017024	0.106768	0.0691497	0.592232	0.105725	0.0187522	0.944267	0.102162	-0.0167826	0.999279	0.316815	-0.00932143
AKL_HTLV1_INFECTION_UP	0.294231	0.0280489	0.514532	0.280657	0.0445216	0.580508	0.295334	0.0192025	0.214529	0.282888	0.0329963	0.999279	0.703398	0.0311923
ALCALA_APOPTOSIS	0.216513	0.0232281	0.0900213	0.209617	0.00263752	0.98357	0.212273	0.00677036	0.533324	0.210151	-0.00655613	0.999279	0.63522	0.00651996
ALCALAY_AML_BY_NPM1_LOCALIZATION_DN	0.0664103	-0.0333031	0.905187	0.0652775	0.020282	0.871881	0.0700178	0.105485	0.0276213	0.0662493	0.0355261	0.999279	0.468057	0.0319974
ALCALAY_AML_BY_NPM1_LOCALIZATION_UP	0.0443288	-0.0537039	0.751435	0.0492197	0.050312	0.885162	0.0470346	-0.019231	0.632829	0.0477253	-0.021907	0.999279	0.988153	-0.0111325
ALFANO_MYC_TARGETS	0.116751	-0.0040845	0.839847	0.115554	0.0124301	0.56435	0.118209	0.0156849	0.225509	0.115186	-0.0306908	0.999279	0.812082	-0.00166505
ALONSO_METASTASIS_EMT_UP	0.121395	0.0664296	0.144479	0.121964	0.111075	0.182227	0.116061	0.0717116	0.00281773	0.117729	0.0540158	0.999279	0.0147566	0.0758079
ALONSO_METASTASIS_UP	0.199095	0.0130867	0.357719	0.198516	0.0212686	0.712957	0.197686	0.017938	0.0703562	0.198901	0.0190962	0.999279	0.42933	0.0178474
ALTEMEIER_RESPONSE_TO_LPS_WITH_MECHANICAL_VENTILATION	0.0595994	0.0259814	0.956362	0.0592315	-0.0626619	0.956002	0.0553588	0.0415426	0.817522	0.0674532	0.0532425	0.999279	0.99976	0.0145262
AMBROSINI_FLAVOPIRIDOL_TREATMENT_TP53	0.0279611	0.0297777	0.969449	0.0291247	-0.0581949	0.682656	0.0277425	0.0152999	0.5598	0.0312262	0.0460139	0.999279	0.981396	0.00822415
AMIT_EGF_RESPONSE_120_HELA	0.118745	-0.000841505	0.953333	0.119198	0.0223618	0.97453	0.110766	-0.0869401	0.137621	0.116794	-0.0597703	0.999279	0.84659	-0.0312975
AMIT_EGF_RESPONSE_120_MCF10A	0.129251	0.0132589	0.944003	0.12134	0.0526047	0.881332	0.131441	0.0567365	0.252156	0.117353	-0.097694	0.999279	0.926286	0.00622651
AMIT_EGF_RESPONSE_240_HELA	0.11766	-0.0305219	0.394924	0.11281	-0.000927778	0.963138	0.116317	-0.0423516	0.361201	0.114352	-0.0383215	0.999279	0.859701	-0.0280307
AMIT_EGF_RESPONSE_40_HELA	0.263158	-0.00942786	0.946389	0.268125	0.0935533	0.610017	0.263158	0.0160928	0.769728	0.242933	-0.0392556	0.999279	0.99046	0.0152407
AMIT_EGF_RESPONSE_480_HELA	0.131742	-0.0204437	0.499015	0.133699	0.0341361	0.713482	0.131836	-0.0255498	0.528809	0.130359	-0.0317239	0.999279	0.911163	-0.0108953
AMIT_EGF_RESPONSE_480_MCF10A	0.0582937	0.0378447	0.703875	0.0557458	-0.0266326	0.894834	0.0564923	-0.0374322	0.337273	0.0555105	-0.060504	0.999279	0.927945	-0.021681
AMIT_EGF_RESPONSE_60_HELA	0.154512	0.0537431	0.813929	0.144803	0.044834	0.825292	0.140357	-0.0478725	0.556994	0.150096	0.0288693	0.999279	0.981988	0.0198935
AMIT_EGF_RESPONSE_60_MCF10A	0.227657	0.0164736	0.809655	0.226583	0.0451341	0.642784	0.224993	0.0456556	0.391328	0.226146	0.0528339	0.999279	0.922282	0.0400243
AMIT_SERUM_RESPONSE_120_MCF10A	0.0985418	0.0983276	0.482528	0.0971481	0.0201637	0.886429	0.0844692	-0.0283604	0.725395	0.0956355	-0.068186	0.999279	0.968689	0.00548621
AMIT_SERUM_RESPONSE_240_MCF10A	0.0647495	-0.0890893	0.0176232	0.0665906	0.0180456	0.864262	0.0699872	-0.0269589	0.5598	0.0661695	-0.0245276	0.999279	0.299526	-0.0306325
AMIT_SERUM_RESPONSE_40_MCF10A	0.281993	-0.0414125	0.46141	0.276146	0.0463929	0.768156	0.290102	0.0201437	0.577845	0.267201	-0.0122983	0.999279	0.92305	0.00320644
AMIT_SERUM_RESPONSE_480_MCF10A	0.0678281	0.170371	0.0463581	0.0636015	0.184597	0.364035	0.0630987	0.131466	0.0541086	0.0649306	0.0567006	0.999279	0.0817994	0.135784
AMIT_SERUM_RESPONSE_60_MCF10A	0.17297	0.0131634	0.719786	0.166692	-0.00270603	0.774351	0.170385	0.0282035	0.945051	0.181031	0.05568	0.999279	0.995746	0.0235852
AMUNDSON_RESPONSE_TO_ARSENITE	0.101163	0.00723251	0.85523	0.102236	0.041185	0.808918	0.0996562	-0.0129011	0.955347	0.101437	0.0109272	0.999279	0.999112	0.0116109
ANASTASSIOU_MULTICANCER_INVASIVENESS_SIGNATURE	0.0470797	0.0595888	0.325095	0.0481259	-0.00181175	0.911272	0.0416793	0.0296078	0.189163	0.0519358	0.131837	0.999279	0.673554	0.0548054
ANDERSEN_CHOLANGIOCARCINOMA_CLASS1	0.0399688	-0.0802348	0.55103	0.0440119	-0.0244785	0.851577	0.0415676	0.0310568	0.487524	0.0449434	0.026755	0.999279	0.937362	-0.0117254
ANDERSEN_CHOLANGIOCARCINOMA_CLASS2	0.0394614	-0.149314	0.084542	0.0405227	0.0302354	0.978952	0.0426838	-0.0103512	0.733239	0.0433297	-0.00055954	0.999279	0.691318	-0.0324974
ANDERSEN_LIVER_CANCER_KRT19_DN	0.0371993	0.100569	0.0860395	0.0345133	-0.028674	0.742681	0.0321257	-0.0906691	0.018174	0.032632	-0.0719256	0.999279	0.0952309	-0.0226748
ANDERSEN_LIVER_CANCER_KRT19_UP	0.433233	0.0162737	0.394924	0.423985	0.0179114	0.531434	0.43529	0.0285059	0.00558396	0.426712	0.0041973	0.999279	0.0957761	0.0167221
APPEL_IMATINIB_RESPONSE	0.108823	0.0651979	0.67946	0.115941	0.00223327	0.870649	0.106212	0.03701	0.777676	0.110247	0.0961243	0.999279	0.991769	0.0501414
APPIERTO_RESPONSE_TO_FENRETINIDE_DN	0.202971	0.00875964	0.813555	0.20427	0.00789911	0.951323	0.193046	0.0360017	0.0697053	0.204305	-0.00834427	0.999279	0.665049	0.011079
APPIERTO_RESPONSE_TO_FENRETINIDE_UP	0.157252	0.0215016	0.993274	0.146476	0.00785463	0.999547	0.160453	-0.0169726	0.660595	0.152341	0.0172372	0.999279	0.99905	0.00740521
APRELIKOVA_BRCA1_TARGETS	0.275843	-0.00902628	0.652347	0.258652	0.0160987	0.651522	0.277164	-0.00331618	0.834838	0.265676	-0.0310418	0.999279	0.978668	-0.00682138
ASGHARZADEH_NEUROBLASTOMA_POOR_SURVIVAL_DN	0.0577863	0.0230183	0.795836	0.0535834	0.129731	0.703316	0.0580989	-0.0114546	0.807493	0.0526572	0.00699567	0.999279	0.991116	0.0370727
ASTIER_INTEGRIN_SIGNALING	0.0910853	0.032562	0.839384	0.0900487	-0.0262879	0.885251	0.0880698	-0.0176442	0.373373	0.0891333	-0.0226996	0.999279	0.958595	-0.00851742
ASTON_MAJOR_DEPRESSIVE_DISORDER_DN	0.0475132	-0.0226905	0.951765	0.0459549	-0.000163062	0.980013	0.0487598	0.000999336	0.526191	0.0467782	-0.042852	0.999279	0.993886	-0.0161765
ASTON_MAJOR_DEPRESSIVE_DISORDER_UP	0.0785378	0.019824	0.790603	0.0822412	0.0365337	0.702991	0.0779366	-0.0292205	0.608791	0.0813872	0.00588161	0.999279	0.975397	0.00825469
AUNG_GASTRIC_CANCER	0.164824	-0.0121437	0.946389	0.158646	-0.00432792	0.999479	0.166932	0.0051583	0.787424	0.166007	0.0133647	0.999279	0.999749	0.000512839
AZARE_NEOPLASTIC_TRANSFORMATION_BY_STAT3_UP	0.10948	0.0220269	0.944165	0.107149	0.102178	0.56435	0.1114	-0.0130801	0.291597	0.102412	-0.0292516	0.999279	0.88102	0.0204683
AZARE_STAT3_TARGETS	0.140001	-0.0192763	0.996631	0.133659	0.0597612	0.591466	0.150532	0.028728	0.977956	0.135436	-0.0245043	0.999279	0.99751	0.0111771
BACOLOD_RESISTANCE_TO_ALKYLATING_AGENTS_DN	0.118785	-0.035403	0.647727	0.120673	0.0137219	0.7653	0.124116	0.018654	0.375141	0.116944	-0.0273367	0.999279	0.909344	-0.00759095
BAE_BRCA1_TARGETS_DN	0.141609	0.00651459	0.795672	0.135479	0.056938	0.591466	0.144216	0.0251932	0.330411	0.138932	0.0886515	0.999279	0.881151	0.0443243
BAE_BRCA1_TARGETS_UP	0.224155	0.0150332	0.834833	0.217493	0.00240591	0.994328	0.219497	-0.00178536	0.667823	0.223766	-0.0035348	0.999279	0.996823	0.00302975
BAELDE_DIABETIC_NEPHROPATHY_DN	0.138778	-0.0189799	0.362134	0.143538	0.063656	0.541758	0.142695	-0.00166668	0.844983	0.138324	-0.00247151	0.999279	0.891639	0.0101345
BAELDE_DIABETIC_NEPHROPATHY_UP	0.0951562	-0.0392987	0.61975	0.0962382	-0.0181329	0.856296	0.0951176	-0.012038	0.251648	0.0990542	0.0271994	0.999279	0.854584	-0.0105676
BAKKER_FOXO3_TARGETS_DN	0.0622508	0.0397968	0.174889	0.0596388	-0.0317236	0.553244	0.0608569	-0.0334306	0.206892	0.0604118	-0.0194489	0.999279	0.45088	-0.0112016
BAKKER_FOXO3_TARGETS_UP	0.0736769	-0.0626986	0.13374	0.078747	-0.00301346	1	0.0742738	-0.0420258	0.480499	0.0816422	-0.0108701	0.999279	0.704036	-0.029652
BALDWIN_PRKCI_TARGETS_UP	0.111713	0.0716706	0.018979	0.114125	0.0303592	0.651522	0.107389	0.00649593	0.91966	0.1145	0.0564755	0.999279	0.346134	0.0412503
BANDRES_RESPONSE_TO_CARMUSTIN_MGMT_24HR_DN	0.0996607	0.0432435	0.515338	0.0929139	0.0168597	0.951323	0.0967435	0.00518369	0.810763	0.0920785	-0.0066294	0.999279	0.985357	0.0146644
BANDRES_RESPONSE_TO_CARMUSTIN_MGMT_48HR_DN	0.0960999	0.00291176	0.824358	0.0961497	0.024715	0.808918	0.0942287	0.0154237	0.38153	0.0935754	-0.0213498	0.999279	0.949655	0.00542517
BANDRES_RESPONSE_TO_CARMUSTIN_WITHOUT_MGMT_48HR_DN	0.12652	0.0417771	0.693031	0.124708	0.0514546	0.722606	0.126892	0.029373	0.294409	0.118089	-0.0272171	0.999279	0.872113	0.0238469
BARIS_THYROID_CANCER_DN	0.14146	-0.0186557	0.446706	0.138753	0.0182647	0.928567	0.146168	-0.0388348	0.291597	0.137861	-0.0282554	0.999279	0.836165	-0.0168703
BARIS_THYROID_CANCER_UP	0.182236	0.0121708	0.707785	0.175881	-0.0101524	0.985519	0.175621	0.0425008	0.317307	0.184417	-0.0327303	0.999279	0.933247	0.00294724
BARRIER_CANCER_RELAPSE_NORMAL_SAMPLE_DN	0.0887713	-0.110424	0.325775	0.0988141	0.0863178	0.770271	0.0885472	-0.0646384	0.184209	0.0958439	-0.0354963	0.999279	0.630442	-0.0310602
BARRIER_CANCER_RELAPSE_NORMAL_SAMPLE_UP	0.0299928	-0.0414417	0.678984	0.0302203	-0.0125205	0.924711	0.0315852	-0.00872381	0.776926	0.0313817	0.0205113	0.999279	0.993703	-0.0105437
BARRIER_COLON_CANCER_RECURRENCE_UP	0.120809	-0.0113857	0.48642	0.118343	0.00756329	0.825292	0.122501	0.0099406	0.220688	0.118894	0.00411209	0.999279	0.773601	0.00255758
BASAKI_YBX1_TARGETS_DN	0.0936079	-0.0389888	0.762031	0.102565	0.077289	0.904018	0.0958095	-0.0485719	0.133471	0.0953125	-0.0446713	0.999279	0.781381	-0.0137358
BASAKI_YBX1_TARGETS_UP	0.0835793	0.0208018	0.8864	0.0756067	0.0269762	0.832058	0.08257	0.112302	0.158466	0.0771604	-0.0257964	0.999279	0.829598	0.0335709
BASSO_B_LYMPHOCYTE_NETWORK	0.197509	-0.0356808	0.650732	0.190825	0	0.984374	0.206724	0.0277683	0.196056	0.192057	-0.0108845	0.999279	0.843252	-0.00469926
BASSO_CD40_SIGNALING_DN	0.0457644	0.0161197	0.905662	0.0511955	0.0928655	0.673028	0.0460132	0.0222194	0.273366	0.0506762	0.0552536	0.999279	0.892458	0.0466145
BASSO_CD40_SIGNALING_UP	0.116172	0.00789321	0.980131	0.112185	-0.00519573	0.878241	0.112995	0.0583514	0.484971	0.115133	-0.0668488	0.999279	0.987773	-0.00144998
BASSO_HAIRY_CELL_LEUKEMIA_UP	0.132987	-0.0972334	0.00246537	0.149097	0.0252398	0.821975	0.147647	-0.0212501	0.355368	0.145342	0.000751935	0.999279	0.0702271	-0.0231229
BAUS_TFF2_TARGETS_UP	0.112464	0.0171503	0.880131	0.112308	0.00987728	0.938706	0.111303	0.0315364	0.108314	0.115565	-0.00447718	0.999279	0.775712	0.0135217
BECKER_TAMOXIFEN_RESISTANCE_DN	0.112442	-0.100661	0.0589495	0.113743	-0.0179918	0.912885	0.119586	-0.0586138	0.0371364	0.114947	-0.0308323	0.999279	0.132937	-0.0520247
BECKER_TAMOXIFEN_RESISTANCE_UP	0.133927	-0.0408199	0.5853	0.146156	0.0286073	0.970905	0.136566	0.0475832	0.391836	0.142164	0.0134156	0.999279	0.934007	0.0121965
BEGUM_TARGETS_OF_PAX3_FOXO1_FUSION_DN	0.0633977	-0.0616313	0.886534	0.0694916	0.0853586	0.78112	0.0623834	-0.0665597	0.346821	0.067609	-0.0038043	0.999279	0.943168	-0.0116592
BEGUM_TARGETS_OF_PAX3_FOXO1_FUSION_UP	0.0717765	-0.0655087	0.193933	0.0815873	0.0609575	0.821127	0.0754676	-0.0635029	0.312334	0.0810659	-0.00146442	0.999279	0.646846	-0.0173796
BEIER_GLIOMA_STEM_CELL_DN	0.122949	0.0355878	0.770872	0.123385	0.0450011	0.825292	0.122315	0.0544143	0.225078	0.124536	-0.0618637	0.999279	0.867035	0.0182849
BEIER_GLIOMA_STEM_CELL_UP	0.00584777	-0.741637	0.0755926	0.0064062	-0.267772	0.914259	0.0110633	-0.159814	0.560565	0.00723859	-0.0676868	0.999279	0.59106	-0.309227
BENITEZ_GBM_PROTEASOME_INHIBITION_RESPONSE	0.119245	0.0353648	0.391957	0.12502	0.0297817	0.810928	0.117468	0.00214498	0.947607	0.119507	-0.0349113	0.999279	0.966169	0.00809503
BENNETT_SYSTEMIC_LUPUS_ERYTHEMATOSUS	0.0299267	-0.218218	0.534921	0.0437804	0.126539	0.994045	0.025264	0.169605	0.142832	0.0504495	0.307893	0.999279	0.740689	0.0964547
BENPORATH_CYCLING_GENES	0.0988246	-0.00992789	0.934333	0.0934593	0.0455173	0.639898	0.101138	0.0456962	0.290072	0.09424	-0.0214798	0.999279	0.898767	0.0149514
BENPORATH_EED_TARGETS	0.0386416	-0.0455272	0.374174	0.0400764	-0.00352156	0.865516	0.0387939	-0.0443971	0.0887843	0.0400367	9.53911e-05	0.999279	0.52594	-0.0233376
BENPORATH_ES_1	0.0818634	0.010982	0.626633	0.0693394	-0.00869523	0.992624	0.0811218	0.0456456	0.451297	0.0740483	-0.0115823	0.999279	0.959729	0.00908751
BENPORATH_ES_2	0.0172583	0.137161	0.78785	0.0123581	-0.265421	0.821216	0.0186189	0.478784	0.041939	0.0132379	0.0292829	0.999279	0.513586	0.0949517
BENPORATH_ES_CORE_NINE_CORRELATED	0.106393	-0.0259138	0.849745	0.101677	-0.0186254	0.936195	0.10154	-0.0315001	0.363297	0.104652	-0.0531741	0.999279	0.962472	-0.0323034
BENPORATH_ES_WITH_H3K27ME3	0.0245921	-0.0950397	0.088133	0.0270754	0.00466414	0.808918	0.0251626	-0.116579	0.0697053	0.027329	-0.0106171	0.999279	0.22477	-0.0543929
BENPORATH_MYC_MAX_TARGETS	0.182259	-0.00120445	0.926979	0.17563	-0.00913017	0.87086	0.182636	0.00541093	0.732262	0.178771	-0.0123887	0.999279	0.997892	-0.00432811
BENPORATH_MYC_TARGETS_WITH_EBOX	0.220552	0.0222415	0.298549	0.217533	0.00544386	0.878241	0.213883	0.00908285	0.388951	0.21714	-0.00471884	0.999279	0.802657	0.00801233
BENPORATH_NANOG_TARGETS	0.11694	-0.011642	0.217578	0.116189	-0.00615028	0.948355	0.116833	-0.00738745	0.0925073	0.116774	-0.0186428	0.999279	0.441439	-0.0109556
BENPORATH_NOS_TARGETS	0.0721311	0.00578647	0.989335	0.068047	-0.021754	0.87504	0.0713115	-0.0494983	0.039884	0.0698655	-0.0511549	0.999279	0.565649	-0.0291552
BENPORATH_OCT4_TARGETS	0.0791394	0.0144113	0.944602	0.0746391	-0.0123813	0.914259	0.0770632	-0.0263896	0.0697053	0.0755529	-0.0482915	0.999279	0.689526	-0.0181628
BENPORATH_PRC2_TARGETS	0.0196953	-0.0695531	0.117986	0.0200276	-0.0461165	0.718735	0.0198786	-0.104235	0.0773688	0.019517	-0.0466548	0.999279	0.261209	-0.0666398
BENPORATH_PROLIFERATION	0.145096	0.0110589	0.868971	0.119839	-0.0143675	0.969288	0.15098	0.165336	0.125109	0.127603	-0.0205587	0.999279	0.809247	0.0353671
BENPORATH_SOX2_TARGETS	0.118857	0.0034362	0.813929	0.115122	0.0140895	0.637405	0.117439	-0.00648269	0.791424	0.114141	-0.0283202	0.999279	0.986987	-0.00431931
BENPORATH_SUZ12_TARGETS	0.0283002	-0.0672756	0.117986	0.0306236	-0.0299002	0.858649	0.0292463	-0.068706	0.0840386	0.0303844	-0.0210607	0.999279	0.2993	-0.0467356
BERENJENO_ROCK_SIGNALING_NOT_VIA_RHOA_DN	0.208705	0.0406866	0.266222	0.195896	0.064262	0.482639	0.210853	0.015579	0.538932	0.198328	0.027055	0.999279	0.72052	0.0368956
BERENJENO_ROCK_SIGNALING_NOT_VIA_RHOA_UP	0.105446	-0.0206595	0.8864	0.109128	0	0.979391	0.10654	-0.0190232	0.959813	0.111089	0.0106075	0.999279	0.999959	-0.00726881
BERENJENO_TRANSFORMED_BY_RHOA_DN	0.104378	0.0677941	0.429818	0.108835	0.0278112	0.886457	0.0986518	-0.0235004	0.673373	0.105537	0.0257622	0.999279	0.950565	0.0244668
BERENJENO_TRANSFORMED_BY_RHOA_FOREVER_DN	0.161087	-0.00940566	0.965043	0.156633	-0.00440451	0.904234	0.164535	0.0262739	0.627492	0.167565	-0.00914565	0.999279	0.996582	0.000829527
BERENJENO_TRANSFORMED_BY_RHOA_REVERSIBLY_DN	0.0652582	-0.189303	0.124808	0.0780579	0.033642	0.916726	0.0663891	-0.0932665	0.33671	0.0706557	-0.20421	0.999279	0.589815	-0.113284
BERENJENO_TRANSFORMED_BY_RHOA_UP	0.154843	-0.0269425	0.884176	0.140051	0.0111879	0.863603	0.159989	0.0523317	0.21861	0.150211	0.00205109	0.999279	0.892744	0.00965703
BERNARD_PPAPDC1B_TARGETS_DN	0.0279416	0.0659556	0.941059	0.025215	-0.0416744	0.916521	0.0256992	-0.132488	0.0959673	0.0247054	-0.090829	0.999279	0.759202	-0.0497589
BERNARD_PPAPDC1B_TARGETS_UP	0.0868675	-0.0413389	0.730654	0.0880604	0	0.893991	0.0881201	-0.0459715	0.0970541	0.0855254	-0.0287237	0.999279	0.701027	-0.0290085
BERTUCCI_INVASIVE_CARCINOMA_DUCTAL_VS_LOBULAR_DN	0.0324962	-0.143424	0.122534	0.034697	-0.0838427	0.909851	0.0381185	0.138447	0.0215216	0.038459	-0.0164173	0.999279	0.14826	-0.0263093
BERTUCCI_INVASIVE_CARCINOMA_DUCTAL_VS_LOBULAR_UP	0.106386	0.00149535	0.934333	0.109078	0.0517272	0.745855	0.110212	0.00681736	0.872766	0.108244	0.0187983	0.999279	0.998274	0.0197095
BERTUCCI_MEDULLARY_VS_DUCTAL_BREAST_CANCER_DN	0.0420561	-0.0181947	0.822106	0.0461834	0.0691896	0.719174	0.0433858	-0.019604	0.786452	0.0460201	0.124594	0.999279	0.992147	0.0389961
BERTUCCI_MEDULLARY_VS_DUCTAL_BREAST_CANCER_UP	0.0764773	0.0122074	0.723207	0.0740726	0.0314096	0.84116	0.0757268	0.0590559	0.039884	0.0739115	-0.00642797	0.999279	0.490083	0.0240612
BHAT_ESR1_TARGETS_NOT_VIA_AKT1_DN	0.0284632	2.56274e-15	0.958625	0.0354131	0.255796	0.591466	0.0253287	-0.15409	0.097022	0.0271928	0.00952738	0.999279	0.669412	0.0278084
BHAT_ESR1_TARGETS_NOT_VIA_AKT1_UP	0.0348015	0.0241705	0.791911	0.0375602	0.00232435	0.930453	0.0326928	-0.0625779	0.231048	0.0375942	-0.0380696	0.999279	0.895868	-0.0185381
BHAT_ESR1_TARGETS_VIA_AKT1_DN	0.0249682	0.00954618	0.614536	0.0256316	0.0397343	0.825292	0.022837	-0.0109554	0.650876	0.0244695	0.0260305	0.999279	0.973584	0.0160889
BHAT_ESR1_TARGETS_VIA_AKT1_UP	0.0559384	-0.00265624	0.776226	0.0591951	0.0234021	0.9742	0.0546099	-0.00841402	0.855916	0.0587943	-0.00632778	0.999279	0.998937	0.00150102
BHATI_G2M_ARREST_BY_2METHOXYESTRADIOL_DN	0.111021	-0.0656115	0.0034549	0.114888	-0.000438522	0.916726	0.115859	-0.00520954	0.56753	0.115209	-0.0115005	0.999279	0.124693	-0.02069
BHATI_G2M_ARREST_BY_2METHOXYESTRADIOL_UP	0.115335	-0.0489125	0.276314	0.114038	0.028289	0.634582	0.122549	0.0216636	0.129048	0.113149	-0.00484729	0.999279	0.475677	-0.00095179
BHATTACHARYA_EMBRYONIC_STEM_CELL	0.271077	0.0267698	0.747839	0.239666	0.000503334	0.99907	0.265489	0.0301965	0.330411	0.240042	-0.0496333	0.999279	0.946316	0.00195906
BIDUS_METASTASIS_DN	0.0312751	0.010911	0.683639	0.0334337	-0.0213462	0.84988	0.0307848	-0.0481817	0.225509	0.0308552	-0.0121066	0.999279	0.851102	-0.0176809
BIDUS_METASTASIS_UP	0.122102	0.0275918	0.719021	0.104977	0.0320141	0.559609	0.120887	0.0450061	0.253281	0.107074	-0.0419369	0.999279	0.80252	0.0156688
BILANGES_RAPAMYCIN_SENSITIVE_GENES	0.216972	0.0261437	0.318351	0.212341	0.000131387	0.970905	0.209885	0.0176528	0.109524	0.217736	0.0291202	0.999279	0.561319	0.018262
BILANGES_RAPAMYCIN_SENSITIVE_VIA_TSC1_AND_TSC2	0.372563	-0.0142721	0.513304	0.360183	-0.033423	0.873919	0.374253	0.00551638	0.533324	0.372878	0.003551	0.999279	0.942716	-0.00965694
BILANGES_SERUM_AND_RAPAMYCIN_SENSITIVE_GENES	0.715723	-0.00484256	0.404036	0.723474	-0.00310096	0.811812	0.712473	0.00111685	0.912688	0.722456	-0.00146292	0.999279	0.965636	-0.0020724
BILANGES_SERUM_RESPONSE_TRANSLATION	0.545797	0.00118393	0.860151	0.54457	0.0016845	0.837605	0.533131	0.0030125	0.558229	0.54418	0.00203075	0.999279	0.985962	0.00197792
BILANGES_SERUM_SENSITIVE_GENES	0.138451	-0.0101973	0.560213	0.134412	-0.000676263	1	0.137984	-0.00307167	0.770017	0.135605	-0.00585476	0.999279	0.989237	-0.00495
BILANGES_SERUM_SENSITIVE_VIA_TSC2	0.165805	0.00835863	0.929623	0.15716	0.093769	0.482639	0.164751	-0.0125271	0.877303	0.153173	0.0230763	0.999279	0.984843	0.0281692
BILBAN_B_CLL_LPL_DN	0.208074	0.00629003	0.968063	0.18742	-0.00510508	0.980013	0.199528	-0.0389797	0.460736	0.191846	-0.0523113	0.999279	0.989792	-0.0225265
BILBAN_B_CLL_LPL_UP	0.0552933	0.0463949	0.79836	0.0537277	0.0794286	0.789069	0.0514022	-0.052352	0.56753	0.0514713	-0.0315966	0.999279	0.979164	0.0104687
BILD_CTNNB1_ONCOGENIC_SIGNATURE	0.0853653	-0.00350594	0.968063	0.067643	0.0761493	0.731951	0.0866936	-0.00553572	0.568902	0.0702031	0.0103605	0.999279	0.986078	0.019367
BILD_E2F3_ONCOGENIC_SIGNATURE	0.0391397	0.0130573	0.860131	0.036144	-0.0257341	0.927102	0.0385405	6.40813e-05	0.863483	0.0385097	0.0298061	0.999279	0.999395	0.00429836
BILD_HRAS_ONCOGENIC_SIGNATURE	0.123945	-0.0536653	0.695067	0.123999	0.0483218	0.779487	0.127653	-0.0253525	0.622847	0.120706	-0.0271194	0.999279	0.975204	-0.0144538
BILD_MYC_ONCOGENIC_SIGNATURE	0.0709192	-0.0415007	0.334038	0.0670635	-0.0128346	0.969288	0.0719689	0.00191064	0.861814	0.0714311	0.0131655	0.999279	0.959152	-0.00981479
BILD_SRC_ONCOGENIC_SIGNATURE	0.0350322	-0.234596	0.0262287	0.0355864	-0.0582117	0.973277	0.0405046	-0.138782	0.092667	0.0389437	0.0163769	0.999279	0.14702	-0.103803
BIOCARTA_AGR_PATHWAY	0.134572	0.058904	0.13374	0.132222	0.0381464	0.488264	0.131898	0.0224628	0.401368	0.131909	0.0223322	0.999279	0.50625	0.0354614
BIOCARTA_ALK_PATHWAY	0.02712	-0.0136849	0.720673	0.030341	0.116108	0.930066	0.0265036	-0.155786	0.196056	0.0258773	-0.0613082	0.999279	0.851643	-0.0286679
BIOCARTA_AT1R_PATHWAY	0.159703	0.00640152	0.651681	0.155474	0.0401681	0.61397	0.16105	0.0283612	0.158466	0.153819	0.02499	0.999279	0.701056	0.0249802
BIOCARTA_ATRBRCA_PATHWAY	0.00224245	Inf	0.0946282	0	NA	0.919441	0.000461681	Inf	0.399597	0	NA	0.999279	0.567164	NA
BIOCARTA_BAD_PATHWAY	0.102459	0.183191	2.62374e-05	0.0944891	0.0828411	0.629456	0.0956642	0.058657	0.0451364	0.0880563	0.0387744	0.999279	0.00043417	0.0908658
BIOCARTA_BCR_PATHWAY	0.148312	0.0420131	0.179008	0.145404	0.0246729	0.722606	0.146795	0.0146753	0.129048	0.142422	0.0242168	0.999279	0.415418	0.0263945
BIOCARTA_BIOPEPTIDES_PATHWAY	0.114085	0.0470027	0.806844	0.106089	0.0581353	0.482639	0.111792	0.0250124	0.505833	0.106449	0.0286767	0.999279	0.91765	0.0397068
BIOCARTA_CARM_ER_PATHWAY	0.07487	-0.00555524	0.747839	0.0763432	0.0687527	0.605276	0.0774697	0.00377035	0.811819	0.0714616	-0.0185409	0.999279	0.980899	0.0121067
BIOCARTA_CERAMIDE_PATHWAY	0.0592105	0.177175	0.0645495	0.0466627	-0.068689	0.996648	0.0574462	0.0284366	0.735175	0.0544948	0.118682	0.999279	0.635572	0.0639011
BIOCARTA_CREB_PATHWAY	0.100036	0.124342	0.017024	0.0938201	0.0872727	0.56435	0.0991624	0.0946775	0.083476	0.0891208	0.0669236	0.999279	0.0752775	0.093304
BIOCARTA_CTCF_PATHWAY	0.0497843	-0.010003	0.817549	0.0470133	0.078432	0.856296	0.050666	-0.0195925	0.679591	0.0506345	0.00449298	0.999279	0.992919	0.0133324
BIOCARTA_DEATH_PATHWAY	0.111458	0.00884324	0.8864	0.0954841	-0.065666	0.886457	0.109955	-0.0723472	0.163607	0.107153	-0.0314907	0.999279	0.847599	-0.0401652
BIOCARTA_EDG1_PATHWAY	0.118336	0.0310436	0.454942	0.122902	0.0677304	0.482639	0.124949	0.0662142	0.0625003	0.119249	0.0421339	0.999279	0.379067	0.0517805
BIOCARTA_EGF_PATHWAY	0.110395	0.0516476	0.772156	0.102964	0.0417212	0.813571	0.109875	0.0162063	0.688183	0.100803	0.0203823	0.999279	0.98933	0.0324893
BIOCARTA_EICOSANOID_PATHWAY	0	NA	0.534887	0.00880491	1.15381	0.724247	0	NA	0.169531	0.00802994	3.67985	0.999279	0.708846	NA
BIOCARTA_EIF4_PATHWAY	0.153761	-0.0407815	0.626633	0.162736	0.080657	0.364626	0.163019	0.0132981	0.706846	0.148833	-0.00806615	0.999279	0.887415	0.0112769
BIOCARTA_ERK_PATHWAY	0.13094	0.0250575	0.702687	0.12575	0.0651186	0.665187	0.12567	-0.0223395	0.487524	0.123256	0.00453555	0.999279	0.936883	0.018093
BIOCARTA_FAS_PATHWAY	0.104861	-0.00394808	0.803213	0.0985153	0.00210561	0.987886	0.106729	0.00876626	0.897527	0.099988	-0.0702988	0.999279	0.999574	-0.0158438
BIOCARTA_FCER1_PATHWAY	0.123005	0.0631876	0.056624	0.117216	0.0250678	0.779487	0.120075	0.0278544	0.139475	0.116689	0.0065318	0.999279	0.25248	0.0306604
BIOCARTA_FMLP_PATHWAY	0.141524	0.0269474	0.517905	0.132174	0.0451411	0.578182	0.141545	0.0200545	0.597779	0.133228	-0.00143943	0.999279	0.903631	0.0226759
BIOCARTA_G1_PATHWAY	0.0910745	-0.00593609	0.735239	0.0921722	0.0553001	0.535398	0.0926054	0.00360449	0.667504	0.0862796	-0.0586812	0.999279	0.953098	-0.00142816
BIOCARTA_G2_PATHWAY	0.0736238	0.00206796	0.949239	0.0699328	-0.00186355	0.961666	0.070204	0.0161892	0.549968	0.0704902	-0.0302066	0.999279	0.994531	-0.00345324
BIOCARTA_GH_PATHWAY	0.0272019	0.0643877	0.527341	0.0272686	0.0842901	0.840506	0.028576	0.159356	0.162295	0.0282958	0.140636	0.999279	0.728865	0.112167
BIOCARTA_GLEEVEC_PATHWAY	0.131128	0.0109812	0.801902	0.123264	0.0686095	0.651522	0.131761	0.04541	0.214529	0.12938	0.0336514	0.999279	0.821463	0.039663
BIOCARTA_GPCR_PATHWAY	0.167179	0.0625266	0.0460801	0.163336	0.0343489	0.722975	0.163534	0.0135145	0.390377	0.16077	0.0214052	0.999279	0.369452	0.0329488
BIOCARTA_HDAC_PATHWAY	0.131918	0.0702314	0.0179674	0.128914	0.0496566	0.541758	0.130387	0.0344458	0.196878	0.12227	-0.00204348	0.999279	0.129621	0.0380726
BIOCARTA_HER2_PATHWAY	0.028921	0.214191	0.273803	0.0284593	0.243442	0.873919	0.027437	0.0342157	0.821438	0.0265796	0.140908	0.999279	0.917346	0.158189
BIOCARTA_HIVNEF_PATHWAY	0.100913	-0.0288932	0.402751	0.0913932	0.00396833	0.97453	0.104289	-0.0155438	0.618123	0.0976626	-0.0265911	0.999279	0.944336	-0.0167649
BIOCARTA_IGF1R_PATHWAY	0.0998835	0.157471	0.000390719	0.0952546	0.0991951	0.591584	0.0980256	0.0901156	0.0607283	0.0913499	0.0682277	0.999279	0.00430863	0.103752
BIOCARTA_IL1R_PATHWAY	0.0882598	0.00473916	0.880131	0.0747945	-0.0128952	0.928567	0.0863031	-0.057484	0.415132	0.082355	-0.021141	0.999279	0.97559	-0.0216952
BIOCARTA_IL2_PATHWAY	0.111347	0.0644411	0.343933	0.102625	0.0111693	0.959624	0.107868	0.0146288	0.537314	0.104587	0.0668001	0.999279	0.902208	0.0392598
BIOCARTA_IL2RB_PATHWAY	0.0930019	0.0536289	0.231851	0.0892022	0.00878356	0.994328	0.0909038	0.0399845	0.275122	0.0905944	0.00740954	0.999279	0.701132	0.0274516
BIOCARTA_INFLAM_PATHWAY	0.0489341	0.058739	0.812056	0.0397393	0.0488308	0.878241	0.0502566	0.070864	0.923369	0.0420695	-0.0488376	0.999279	0.999084	0.032399
BIOCARTA_INTEGRIN_PATHWAY	0.146506	-0.0159294	0.769797	0.143816	0.0410115	0.571677	0.153514	0.0215028	0.42198	0.137299	-0.0284195	0.999279	0.909141	0.00454136
BIOCARTA_KERATINOCYTE_PATHWAY	0.100241	0.054276	0.408724	0.091108	0.0398629	0.858649	0.100714	0.0274914	0.74535	0.099131	0.0206996	0.999279	0.952627	0.0355825
BIOCARTA_MAPK_PATHWAY	0.0845669	0.0310779	0.553365	0.0760786	0.0334298	0.673028	0.081554	-0.0112323	0.905561	0.0833104	0.0372448	0.999279	0.975162	0.0226301
BIOCARTA_MET_PATHWAY	0.131485	-0.0159809	0.789632	0.130864	0.0741229	0.580508	0.138661	0.0132156	0.520157	0.123309	-0.00332461	0.999279	0.942321	0.0170082
BIOCARTA_NFAT_PATHWAY	0.119181	0.0215755	0.534903	0.120903	0.0860285	0.531434	0.122672	0.0341646	0.0943681	0.114354	-0.00975589	0.999279	0.51116	0.0330032
BIOCARTA_NFKB_PATHWAY	0.0815691	0.0702144	0.652347	0.0666799	-0.00213891	0.976173	0.0772326	-0.0448794	0.856037	0.0897474	0.151032	0.999279	0.996492	0.0435569
BIOCARTA_NKT_PATHWAY	0.00506951	-0.00757322	0.966182	0.0116065	0.257077	0.864262	0.00525628	0.071305	0.855451	0.0102191	0.00755339	0.999279	0.999588	0.0820905
BIOCARTA_NO1_PATHWAY	0.11699	0.042877	0.162784	0.109431	0.0310507	0.779487	0.115062	0.00627411	0.777676	0.105922	-0.0330552	0.999279	0.795961	0.0117866
BIOCARTA_NTHI_PATHWAY	0.0882325	-0.0184176	0.892283	0.0760147	0.0320276	0.83917	0.0899329	-0.0168239	0.638689	0.0824385	-0.0777705	0.999279	0.993087	-0.0202461
BIOCARTA_NUCLEARRS_PATHWAY	0	NA	0.534903	0.000970874	-1.40988	0.713482	0	NA	0.928569	0.00185853	0.896164	0.999279	0.978586	NA
BIOCARTA_P38MAPK_PATHWAY	0.0881797	0.0173446	0.970609	0.0880008	0.0639822	0.483636	0.0890546	0.0498095	0.0753599	0.0886669	-0.0226291	0.999279	0.570978	0.0271268
BIOCARTA_PDGF_PATHWAY	0.114542	0.00502653	0.936468	0.109543	0.0418998	0.689047	0.118745	0.00688639	0.484971	0.111432	0.0348588	0.999279	0.969395	0.0221679
BIOCARTA_PPARA_PATHWAY	0.10981	-0.0171185	0.949239	0.116582	0.11026	0.677248	0.109796	0.01066	0.912867	0.122364	0.0221478	0.999279	0.997786	0.0314874
BIOCARTA_PTDINS_PATHWAY	0.126696	0.0211302	0.858405	0.135498	0.0931318	0.488264	0.126901	-0.00909996	0.683155	0.116022	-0.0783013	0.999279	0.961606	0.00671517
BIOCARTA_PYK2_PATHWAY	0.166453	0.00637362	0.69742	0.16017	0.0269262	0.669536	0.16668	0.0195307	0.299784	0.161424	0.024288	0.999279	0.863037	0.0192796
BIOCARTA_RACCYCD_PATHWAY	0.209639	0.0171871	0.739636	0.197836	0.0708951	0.488264	0.212455	0.0304578	0.21658	0.196172	0.000612133	0.999279	0.747049	0.0297881
BIOCARTA_RAS_PATHWAY	0.189895	0.0477922	0.282355	0.181283	0.0910226	0.364035	0.190509	0.0358534	0.145604	0.179976	0.0400543	0.999279	0.394907	0.0536807
BIOCARTA_RHO_PATHWAY	0.15557	-0.050336	0.119423	0.151068	0.0244557	0.682656	0.166172	-0.000143146	0.861801	0.147078	-0.0360972	0.999279	0.723701	-0.0155302
BIOCARTA_STRESS_PATHWAY	0.102874	-0.0135068	0.805452	0.0885615	0.0132358	0.951323	0.102484	-0.0581779	0.560565	0.100578	-0.00165637	0.999279	0.989052	-0.0150263
BIOCARTA_TCR_PATHWAY	0.147279	0.0157827	0.440105	0.137569	0.00616929	0.846535	0.14996	0.0121857	0.564117	0.140338	0.0112158	0.999279	0.926528	0.0113384
BIOCARTA_TNFR1_PATHWAY	0.105005	0.0132207	0.553007	0.100024	0.0399218	0.920645	0.103065	-0.00150761	0.995452	0.0978807	-0.061327	0.999279	0.994787	-0.00242304
BIOCARTA_TOLL_PATHWAY	0.135673	0.00947003	0.839847	0.116671	-0.0116154	0.999479	0.135562	-0.0413224	0.498004	0.129487	0.00278423	0.999279	0.987837	-0.0101709
BIOCARTA_TPO_PATHWAY	0.130601	0.0558532	0.78894	0.119753	0.0529312	0.642009	0.131152	0.0144471	0.622847	0.121123	0.0224909	0.999279	0.970052	0.0364306
BIOCARTA_VDR_PATHWAY	0.0988581	0.0851288	0.336731	0.0797855	0.0436962	0.916726	0.103649	0.0453708	0.629596	0.0829793	0.0205764	0.999279	0.915746	0.048693
BIOCARTA_VEGF_PATHWAY	0.0931322	0.0101621	0.923835	0.0876758	0.0141182	0.965068	0.0913578	-0.0361993	0.345309	0.0846341	-0.0557611	0.999279	0.96804	-0.01692
BIOCARTA_VIP_PATHWAY	0.178402	0.0520975	0.359968	0.158908	0.0304086	0.872003	0.168339	-0.0216565	0.732262	0.167631	-0.0255738	0.999279	0.93794	0.00881894
BIOCARTA_WNT_PATHWAY	0.09158	0.0268683	0.87413	0.0908723	0.0381024	0.799093	0.088186	-0.024598	0.696707	0.089818	-0.0418401	0.999279	0.993632	-0.000366837
BLALOCK_ALZHEIMERS_DISEASE_DN	0.227115	0.0141122	0.682706	0.224371	0.00474295	0.951323	0.225732	0.0103706	0.338127	0.226381	-0.000993908	0.999279	0.932251	0.00705797
BLALOCK_ALZHEIMERS_DISEASE_INCIPIENT_DN	0.17744	0.0204298	0.527019	0.173536	0.0207473	0.808918	0.178427	0.0085287	0.454985	0.173575	0.00241764	0.999279	0.915465	0.0130309
BLALOCK_ALZHEIMERS_DISEASE_INCIPIENT_UP	0.0764179	-0.0130919	0.67946	0.0735126	0.0322352	0.488264	0.0782633	-0.00943115	0.702828	0.073407	2.18357e-05	0.999279	0.939672	0.0024335
BLALOCK_ALZHEIMERS_DISEASE_UP	0.143431	-0.00361839	0.944204	0.142276	0.0509781	0.56435	0.144751	-0.00204319	0.641169	0.138054	-0.00398576	0.999279	0.976087	0.0103327
BLANCO_MELO_BETA_INTERFERON_TREATED_BRONCHIAL_EPITHELIAL_CELLS_DN	0.0121604	-0.122603	0.13374	0.0155012	0	0.962354	0.0131197	-0.0781406	0.328883	0.0147901	0.0774595	0.999279	0.610765	-0.0308209
BLANCO_MELO_BETA_INTERFERON_TREATED_BRONCHIAL_EPITHELIAL_CELLS_UP	0.0515705	-0.149034	0.136242	0.0564455	0.0255026	0.970905	0.0561692	-0.0123338	0.547785	0.0573532	-0.049649	0.999279	0.730455	-0.0463785
BLANCO_MELO_BRONCHIAL_EPITHELIAL_CELLS_INFLUENZA_A_DEL_NS1_INFECTION_DN	0.0172489	0.194042	0.81862	0.0111143	0.0662533	0.956553	0.0168219	0.420831	0.0620616	0.0135726	0.266287	0.999279	0.641653	0.236853
BLANCO_MELO_BRONCHIAL_EPITHELIAL_CELLS_INFLUENZA_A_DEL_NS1_INFECTION_UP	0.0673649	0.0122114	0.939058	0.0666188	-0.0270938	0.970905	0.0643432	0.0103664	0.811291	0.0687911	-0.0315121	0.999279	0.999727	-0.00900704
BLANCO_MELO_BRONCHIAL_EPITHELIAL_CELLS_INFLUENZA_A_INFECTION_DN	0.0710137	-0.045577	0.684232	0.0731354	0.0350232	0.698197	0.0752676	0.0530044	0.0411492	0.0735975	0.057119	0.999279	0.447267	0.0248924
BLANCO_MELO_BRONCHIAL_EPITHELIAL_CELLS_INFLUENZA_A_INFECTION_UP	0.0382168	-0.055102	0.561752	0.0392506	0.0390363	0.779487	0.0393344	0.0316007	0.346119	0.0407036	0.079654	0.999279	0.87683	0.0237973
BLANCO_MELO_COVID19_BRONCHIAL_EPITHELIAL_CELLS_SARS_COV_2_INFECTION_DN	0.0107036	0.124482	0.638062	0.00766376	0.0914984	0.919441	0.0093478	0	0.902156	0.00386043	-0.6887	0.999279	0.995856	-0.11818
BLANCO_MELO_COVID19_BRONCHIAL_EPITHELIAL_CELLS_SARS_COV_2_INFECTION_UP	0.0816361	0.0731492	0.288809	0.0736183	-0.0563747	0.970905	0.0736785	0.0339544	0.373484	0.0828138	-0.0307846	0.999279	0.808007	0.00498607
BLANCO_MELO_COVID19_SARS_COV_2_INFECTION_A594_ACE2_EXPRESSING_CELLS_DN	0.0939597	-0.0140059	0.969449	0.0985769	0.00825973	0.89191	0.0925315	0.0118807	0.403707	0.0957972	0.011733	0.999279	0.977575	0.00446687
BLANCO_MELO_COVID19_SARS_COV_2_INFECTION_A594_ACE2_EXPRESSING_CELLS_RUXOLITINIB_DN	0.149133	0.0323153	0.414876	0.157825	0.0471361	0.682656	0.138498	0.0372948	0.117658	0.149574	0.0120554	0.999279	0.557869	0.0322004
BLANCO_MELO_COVID19_SARS_COV_2_INFECTION_A594_ACE2_EXPRESSING_CELLS_RUXOLITINIB_UP	0.0753434	0.0473141	0.74306	0.0705606	0.0629666	0.894258	0.0692115	-0.0369104	0.782897	0.0718964	0.0093022	0.999279	0.995451	0.0206681
BLANCO_MELO_COVID19_SARS_COV_2_INFECTION_A594_ACE2_EXPRESSING_CELLS_UP	0.0785475	0.0137007	0.614536	0.0777363	0.0617746	0.889926	0.0746842	-0.00783222	0.950619	0.0772777	-0.0142113	0.999279	0.995435	0.0133579
BLANCO_MELO_COVID19_SARS_COV_2_INFECTION_A594_CELLS_DN	0.034741	-0.0556568	0.48387	0.0368325	-0.0670149	0.808918	0.0351147	0.0210043	0.790907	0.0414004	0.0150435	0.999279	0.968501	-0.021656
BLANCO_MELO_COVID19_SARS_COV_2_INFECTION_A594_CELLS_UP	0.0177791	-0.304263	0.013873	0.0232292	0.031399	0.864262	0.0223515	0.0657032	0.667142	0.02376	0.0344934	0.999279	0.28983	-0.0431668
BLANCO_MELO_COVID19_SARS_COV_2_INFECTION_CALU3_CELLS_UP	0.0708451	-0.0224703	0.824894	0.069147	-0.0145979	0.999479	0.0686073	0.0285955	0.939335	0.0754092	0.00839379	0.999279	0.999853	-1.97303e-05
BLANCO_MELO_COVID19_SARS_COV_2_LOW_MOI_INFECTION_A594_ACE2_EXPRESSING_CELLS_UP	0.123117	0.0615957	0.255438	0.111625	0.00562197	0.95498	0.117134	0.0304356	0.848716	0.113965	-0.0260703	0.999279	0.924515	0.0178957
BLANCO_MELO_COVID19_SARS_COV_2_POS_PATIENT_LUNG_TISSUE_DN	0.0469591	-0.026967	0.253633	0.0450604	-0.0219759	0.651522	0.0465522	-0.0553814	0.039884	0.0452593	-0.0252823	0.999279	0.261838	-0.0324017
BLANCO_MELO_COVID19_SARS_COV_2_POS_PATIENT_LUNG_TISSUE_UP	0.0333592	-0.0570862	0.370404	0.0335075	0.00925797	0.999479	0.0331338	-0.0128643	0.895007	0.0345902	0.020546	0.999279	0.973863	-0.0100366
BLANCO_MELO_HUMAN_PARAINFLUENZA_VIRUS_3_INFECTION_A594_CELLS_DN	0.00741111	-0.323607	0.107884	0.0113884	-0.21205	0.754597	0.0103531	0.0224148	0.617662	0.0124669	0.00199819	0.999279	0.649292	-0.127811
BLANCO_MELO_HUMAN_PARAINFLUENZA_VIRUS_3_INFECTION_A594_CELLS_UP	0.0723191	-0.0607238	0.187533	0.074743	-0.00357353	0.978952	0.0734293	0.00953221	0.912688	0.0780333	-0.000260734	0.999279	0.893346	-0.0137565
BLANCO_MELO_INFLUENZA_A_INFECTION_A594_CELLS_DN	0.0635497	0.0592472	0.0789357	0.0638092	-0.0155615	0.97453	0.0578026	-0.017169	0.280141	0.0618301	-0.0300406	0.999279	0.46572	-0.000880981
BLANCO_MELO_INFLUENZA_A_INFECTION_A594_CELLS_UP	0.159965	-0.011805	0.90631	0.146355	-0.0488454	0.985519	0.161409	0.0102302	0.752601	0.140793	-0.107424	0.999279	0.999239	-0.039461
BLANCO_MELO_MERS_COV_INFECTION_MCR5_CELLS_DN	0.0979165	0.00374852	0.989335	0.0965896	-0.00280844	0.873919	0.095291	-0.0280774	0.225509	0.0942182	-0.0217381	0.999279	0.916203	-0.0122188
BLANCO_MELO_MERS_COV_INFECTION_MCR5_CELLS_UP	0.0423684	0.0266792	0.956362	0.0437799	0.0317425	1	0.0398807	-0.00446083	0.585033	0.0453113	0.000899086	0.999279	0.996995	0.013715
BLANCO_MELO_RESPIRATORY_SYNCYTIAL_VIRUS_INFECTION_A594_CELLS_DN	0.00672388	-0.165349	0.505638	0.00977337	0.0323376	0.944572	0.00931511	0.346985	0.00281773	0.0104024	-0.00403874	0.999279	0.104404	0.0524837
BLANCO_MELO_RESPIRATORY_SYNCYTIAL_VIRUS_INFECTION_A594_CELLS_UP	0.0626866	-0.070173	0.224424	0.0631998	-0.00499768	0.951323	0.0633928	-0.0201885	0.932475	0.0679369	-0.00533047	0.999279	0.91914	-0.0251724
BLUM_RESPONSE_TO_SALIRASIB_DN	0.139016	0.0531548	0.57056	0.1254	0.0263142	0.83894	0.136493	0.0765832	0.151341	0.127488	0.00468863	0.999279	0.7304	0.0401852
BLUM_RESPONSE_TO_SALIRASIB_UP	0.12249	-0.0506686	0.348476	0.126263	0.0223056	0.628264	0.126215	0.00728438	0.841753	0.121203	-0.0323904	0.999279	0.908008	-0.0133673
BOCHKIS_FOXA2_TARGETS	0.0652491	-0.00236328	0.858384	0.0644902	-0.0169673	0.702991	0.0644176	0.00897805	0.280141	0.0642682	-0.0181445	0.999279	0.894753	-0.00712426
BOGNI_TREATMENT_RELATED_MYELOID_LEUKEMIA_DN	0.102512	0.0510801	0.73904	0.0961445	0.0227642	0.768156	0.0992706	-0.0218759	0.547005	0.0939794	-0.0363304	0.999279	0.96876	0.00390951
BOGNI_TREATMENT_RELATED_MYELOID_LEUKEMIA_UP	0.0879159	-0.00892308	0.949239	0.086949	0.0136397	0.970905	0.0878415	-0.024027	0.518972	0.0823003	-0.0476632	0.999279	0.993091	-0.0167434
BOHN_PRIMARY_IMMUNODEFICIENCY_SYNDROM_DN	0.0573796	-0.0613621	0.781468	0.0690572	0.113914	0.602684	0.0597811	0.0453899	0.709765	0.0623201	0.051187	0.999279	0.974517	0.0372822
BOHN_PRIMARY_IMMUNODEFICIENCY_SYNDROM_UP	0.14619	0.00130231	0.839847	0.141139	0.046423	0.810928	0.146322	0.0152277	0.595139	0.137042	-0.0297507	0.999279	0.986353	0.00830057
BONCI_TARGETS_OF_MIR15A_AND_MIR16_1	0.067753	0.0284203	0.66663	0.065033	0.0851239	0.700352	0.0654252	-0.0400517	0.492043	0.064969	-0.00104101	0.999279	0.937871	0.0181129
BONOME_OVARIAN_CANCER_POOR_SURVIVAL_UP	0.0936552	-0.0101305	0.750233	0.0914901	0.0900211	0.665235	0.0956119	-0.016502	0.741011	0.09259	0.0564753	0.999279	0.98129	0.029966
BONOME_OVARIAN_CANCER_SURVIVAL_OPTIMAL_DEBULKING	0.0902726	0.00383521	0.838574	0.0902384	-0.00464513	0.994328	0.0890777	-0.00953354	0.595139	0.0934772	0.0142311	0.999279	0.994206	0.000971916
BONOME_OVARIAN_CANCER_SURVIVAL_SUBOPTIMAL_DEBULKING	0.0526223	0.0492526	0.588442	0.0527475	0.0216027	0.895902	0.0514957	-0.00689492	0.622847	0.0516611	0.0110395	0.999279	0.973183	0.01875
BOQUEST_STEM_CELL_CULTURED_VS_FRESH_DN	0.0787133	0.135479	0.374177	0.0763873	0.0170909	0.979391	0.0689079	0.0307286	0.99304	0.0729817	-0.0413193	0.999279	0.980295	0.0354949
BOQUEST_STEM_CELL_CULTURED_VS_FRESH_UP	0.096954	0.00140023	0.918304	0.0956322	0.0481522	0.730502	0.0961743	0.00522826	0.837876	0.0974799	0.0232516	0.999279	0.997078	0.0195081
BOQUEST_STEM_CELL_DN	0.0492098	-0.0822792	0.0203678	0.051439	-0.0378219	0.903632	0.0521053	-0.0184861	0.778657	0.0523936	-0.0428565	0.999279	0.386935	-0.0453609
BOQUEST_STEM_CELL_UP	0.0430377	-0.0151596	0.758743	0.0416644	-0.0908744	0.7202	0.0424478	-0.0269076	0.587817	0.045325	0.0766568	0.999279	0.971487	-0.0140712
BORCZUK_MALIGNANT_MESOTHELIOMA_DN	0.043092	0.0903157	0.473043	0.0389841	0.056674	0.99907	0.0406953	-0.0548146	0.402799	0.0366747	-0.105762	0.999279	0.912769	-0.00339665
BORCZUK_MALIGNANT_MESOTHELIOMA_UP	0.203424	0.0191285	0.664523	0.188281	-0.00318332	0.927102	0.205429	0.0221312	0.299908	0.19578	0.00253655	0.999279	0.908393	0.0101532
BORLAK_LIVER_CANCER_EGF_UP	0.243361	-0.030651	0.29044	0.250396	0.0103907	0.873809	0.251017	-0.0016697	0.789821	0.245963	-0.0243987	0.999279	0.920091	-0.0115822
BOSCO_ALLERGEN_INDUCED_TH2_ASSOCIATED_MODULE	0.0591657	-0.0336627	0.9363	0.0615609	0.0219024	0.866068	0.0599022	-0.0213263	0.680383	0.061509	0.0099521	0.999279	0.996731	-0.00578362
BOSCO_EPITHELIAL_DIFFERENTIATION_MODULE	0.0632604	-0.133267	0.0161282	0.0782123	0.0149623	0.970905	0.0749845	0.0013442	0.977956	0.0774984	0.0101466	0.999279	0.399169	-0.0267034
BOSCO_INTERFERON_INDUCED_ANTIVIRAL_MODULE	0.0145122	-0.0586719	0.69015	0.0180035	-0.170918	0.808918	0.0139098	-0.0189642	0.959658	0.0222479	0.0799327	0.999279	0.996127	-0.0421553
BOSCO_TH1_CYTOTOXIC_MODULE	0.0128866	-0.0794491	0.487577	0.0139168	0.0708835	0.825292	0.0131616	0.141326	0.346958	0.0150533	0.0255225	0.999279	0.862567	0.0395708
BOUDOUKHA_BOUND_BY_IGF2BP2	0.226344	0.0156047	0.0900213	0.226102	0.00897771	0.84116	0.223275	0.0154483	0.0982905	0.228512	0.0167969	0.999279	0.279165	0.0142069
BOYAULT_LIVER_CANCER_SUBCLASS_G1_DN	0.0776274	0.0277229	0.731018	0.078879	-0.0211863	0.980013	0.0714071	-0.00966411	0.98603	0.07567	-0.000896808	0.999279	0.999535	-0.00100608
BOYAULT_LIVER_CANCER_SUBCLASS_G1_UP	0.122556	0.0165907	0.833834	0.120076	0.0476716	0.768156	0.123363	0.00101195	0.765614	0.11747	-0.0107953	0.999279	0.993861	0.0136197
BOYAULT_LIVER_CANCER_SUBCLASS_G12_UP	0.0544006	0.139498	0.0833431	0.0502117	-0.0928131	0.895369	0.0460687	-0.0637309	0.487524	0.05122	-0.0220341	0.999279	0.577149	-0.00976999
BOYAULT_LIVER_CANCER_SUBCLASS_G123_DN	0.0155203	-0.0955777	0.400902	0.01791	-0.0967014	0.809567	0.0177569	0.00623195	0.897527	0.01899	-0.00580303	0.999279	0.963195	-0.0479625
BOYAULT_LIVER_CANCER_SUBCLASS_G123_UP	0.136114	-0.0373619	0.829547	0.11703	0.048726	0.748755	0.144867	0.0429785	0.314988	0.12212	-0.0298094	0.999279	0.916692	0.00613332
BOYAULT_LIVER_CANCER_SUBCLASS_G2	0.0251011	-0.169002	0.118801	0.0243212	-0.220433	0.61397	0.023108	-0.275007	0.0116808	0.0292317	0.0866612	0.999279	0.0782566	-0.144445
BOYAULT_LIVER_CANCER_SUBCLASS_G23_UP	0.0809287	0.112647	0.440105	0.0658352	0.0791055	0.825292	0.0792547	0.176747	0.0615204	0.0681609	0.0100547	0.999279	0.473103	0.0946386
BOYAULT_LIVER_CANCER_SUBCLASS_G3_DN	0.0255364	0.0914584	0.178421	0.0293204	0.11969	0.571677	0.0241462	-0.0368368	0.990933	0.0271496	0.116795	0.999279	0.800845	0.0727766
BOYAULT_LIVER_CANCER_SUBCLASS_G3_UP	0.169182	0.0224146	0.856423	0.154368	0	0.951282	0.168248	0.0278982	0.49628	0.158337	-0.0134298	0.999279	0.986229	0.00922075
BOYAULT_LIVER_CANCER_SUBCLASS_G5_DN	0.159915	-0.0131368	0.813555	0.153345	0.00186726	0.979031	0.162667	-0.0271197	0.585033	0.15782	-0.0708695	0.999279	0.992221	-0.0273147
BOYAULT_LIVER_CANCER_SUBCLASS_G6_UP	0.0372415	-0.0681939	0.291201	0.0402333	0.00719999	0.992624	0.0422613	0.0204427	0.693021	0.0388313	0.00465837	0.999279	0.920002	-0.0089732
BOYLAN_MULTIPLE_MYELOMA_C_CLUSTER_DN	0.0890585	-0.0679089	0.317435	0.089367	-0.0107479	0.99907	0.0906264	-0.075718	0.330087	0.0959467	-0.0260435	0.999279	0.807924	-0.0451046
BOYLAN_MULTIPLE_MYELOMA_C_CLUSTER_UP	0.041988	0.077721	0.205279	0.040397	0.101311	0.870649	0.0397016	0.0321343	0.531247	0.0396911	-0.0118239	0.999279	0.788042	0.0498355
BOYLAN_MULTIPLE_MYELOMA_C_D_DN	0.0450557	-0.0490901	0.7427	0.0528249	0.0056806	0.944572	0.0447161	-0.0496963	0.745924	0.0506644	-0.00320745	0.999279	0.995592	-0.0240783
BOYLAN_MULTIPLE_MYELOMA_C_D_UP	0.091084	0.00426567	0.734127	0.0839608	0.0319781	0.828358	0.0914306	-0.0205504	0.568406	0.0829867	0.00166317	0.999279	0.976902	0.00433914
BOYLAN_MULTIPLE_MYELOMA_C_DN	0.087495	-0.10942	0.021347	0.0886803	0.0441543	0.851204	0.0952116	0.0233718	0.953264	0.0883175	-0.0260411	0.999279	0.422505	-0.0169838
BOYLAN_MULTIPLE_MYELOMA_C_UP	0.0526257	0.218917	0.0259985	0.0446295	0.102543	0.651522	0.0429161	0.0285478	0.376091	0.0477154	0.103138	0.999279	0.257142	0.113286
BOYLAN_MULTIPLE_MYELOMA_D_CLUSTER_DN	0.0758525	-0.0654287	0.0602032	0.0751367	-0.0249791	0.98357	0.0792723	-0.000723518	0.89039	0.0780893	0.0119879	0.999279	0.659907	-0.0197858
BOYLAN_MULTIPLE_MYELOMA_D_CLUSTER_UP	0.0750153	0.0424391	0.544777	0.0755356	0.0184635	0.825292	0.0699592	-0.013963	0.381342	0.0724939	-0.00794292	0.999279	0.896978	0.00974916
BOYLAN_MULTIPLE_MYELOMA_D_DN	0.0885458	-0.0390842	0.207128	0.0887946	0.00497359	0.9742	0.0910821	-0.0172525	0.318986	0.0899165	0.000210147	0.999279	0.704394	-0.0127882
BOYLAN_MULTIPLE_MYELOMA_D_UP	0.052987	-0.0485163	0.446706	0.0508332	0.0395546	0.676138	0.053716	-0.0571472	0.039884	0.0476296	-0.0328112	0.999279	0.356022	-0.02473
BOYLAN_MULTIPLE_MYELOMA_PCA1_UP	0.0507626	-0.0406652	0.781016	0.0596092	0.0299226	0.969288	0.0503343	-0.0605761	0.939335	0.0572281	0.0449263	0.999279	0.999567	-0.0065981
BOYLAN_MULTIPLE_MYELOMA_PCA3_DN	0.0297397	-0.0931094	0.0703731	0.0305031	-0.00259524	0.951323	0.0309754	-0.0564359	0.755026	0.0300472	-0.0320757	0.999279	0.650465	-0.0460541
BOYLAN_MULTIPLE_MYELOMA_PCA3_UP	0.0581068	-0.0967625	0.0523845	0.0610188	0.0333434	0.811245	0.062633	-0.030312	0.762116	0.0592074	-0.000781979	0.999279	0.551656	-0.0236283
BRACHAT_RESPONSE_TO_CAMPTOTHECIN_DN	0.277893	0.00693812	0.931358	0.277605	0.0094502	0.898345	0.279697	0.00459185	0.794313	0.276229	-0.00753509	0.999279	0.999155	0.00336127
BRACHAT_RESPONSE_TO_CAMPTOTHECIN_UP	0.0302436	-0.269173	0.0505366	0.0307906	0.0560835	0.885162	0.0368473	0.035428	0.904542	0.0305771	-0.0688299	0.999279	0.600719	-0.0616228
BRACHAT_RESPONSE_TO_CISPLATIN	0.020703	-0.378628	0.00392591	0.0220064	-0.00568551	0.97453	0.0250912	-0.0795794	0.56753	0.0178354	-0.168948	0.999279	0.139713	-0.15821
BRACHAT_RESPONSE_TO_METHOTREXATE_DN	0.255183	-0.01097	0.942105	0.257424	-0.0160599	0.975248	0.256384	-0.00509575	0.991904	0.261186	-0.0113038	0.999279	0.999997	-0.0108573
BRACHAT_RESPONSE_TO_METHOTREXATE_UP	0.0307914	-0.409306	0.00631913	0.0343383	0.0913827	0.851204	0.0378081	-0.11947	0.455207	0.0318195	-0.0162232	0.999279	0.150047	-0.113404
BREDEMEYER_RAG_SIGNALING_NOT_VIA_ATM_DN	0.0253422	-0.184798	0.323094	0.0303381	0.0423439	0.723403	0.0299052	-0.0458301	0.440008	0.0275945	-0.123337	0.999279	0.804353	-0.0779053
BREDEMEYER_RAG_SIGNALING_NOT_VIA_ATM_UP	0.0306366	-0.04486	0.561752	0.0365147	0.00287008	0.958481	0.0334426	0.0194358	0.922447	0.0337329	-0.00567889	0.999279	0.994231	-0.00705826
BREDEMEYER_RAG_SIGNALING_VIA_ATM_NOT_VIA_NFKB_DN	0.0620181	-0.0303121	0.783018	0.0615263	0.0495768	0.728283	0.0653816	0.0390325	0.544764	0.0684436	0.0593954	0.999279	0.968792	0.0294231
BREDEMEYER_RAG_SIGNALING_VIA_ATM_NOT_VIA_NFKB_UP	0.0438655	-0.0637503	0.178421	0.0435998	-0.0834668	0.642784	0.0462725	-0.03485	0.256377	0.0435694	-0.048457	0.999279	0.530735	-0.057631
BRIDEAU_IMPRINTED_GENES	0.0416959	0.0291688	0.874602	0.0438683	0.0109359	0.936007	0.0438173	0.0279568	0.3887	0.0445372	0.0374204	0.999279	0.970743	0.0263705
BROCKE_APOPTOSIS_REVERSED_BY_IL6	0.118927	-0.0408279	0.863613	0.12468	0.01876	0.817904	0.119287	-0.00371871	0.912688	0.124481	-0.0233595	0.999279	0.998901	-0.0122865
BROWN_MYELOID_CELL_DEVELOPMENT_DN	0.142694	0.0410806	0.563815	0.132803	0.0468891	0.808918	0.141785	0.0443472	0.285964	0.132972	-0.00071875	0.999279	0.850258	0.0328995
BROWN_MYELOID_CELL_DEVELOPMENT_UP	0.0868587	-0.0507491	0.164282	0.08938	-0.0179142	0.950214	0.0875287	-0.0301952	0.185113	0.0888989	-0.0317134	0.999279	0.527008	-0.032643
BROWNE_HCMV_INFECTION_10HR_DN	0.106468	0.0370801	0.770341	0.099499	0.00613689	0.928567	0.102499	-0.0711895	0.0773688	0.0935061	-0.0487148	0.999279	0.670758	-0.0191719
BROWNE_HCMV_INFECTION_10HR_UP	0.0785883	-0.0209663	0.652347	0.0732406	0.0481084	0.825292	0.0788201	0.00812178	0.932475	0.0756469	-0.00713512	0.999279	0.99453	0.00703218
BROWNE_HCMV_INFECTION_12HR_DN	0.0546282	0.0834749	0.017024	0.0501234	-0.0257942	0.825292	0.0515571	0.025527	0.623754	0.0506936	0.00860341	0.999279	0.303765	0.0229528
BROWNE_HCMV_INFECTION_12HR_UP	0.0328302	0.0170089	0.939266	0.0311459	-0.0699088	0.84116	0.0310805	-0.0303456	0.602819	0.0343657	-0.0125934	0.999279	0.992954	-0.0239597
BROWNE_HCMV_INFECTION_14HR_DN	0.0680606	0.00125785	0.92802	0.0641488	0.0267934	0.872649	0.0698133	0.0151869	0.57343	0.0638463	-0.0333862	0.999279	0.992102	0.00246299
BROWNE_HCMV_INFECTION_14HR_UP	0.0645617	0.0435369	0.178421	0.0572976	-0.00622188	0.974615	0.0599133	-0.0167973	0.715233	0.0604447	-0.00859407	0.999279	0.841433	0.00298093
BROWNE_HCMV_INFECTION_16HR_DN	0.07225	-0.0311926	0.613963	0.0712561	0.0522794	0.504876	0.0745815	-0.000359326	0.965056	0.0676148	-0.0535005	0.999279	0.965572	-0.00819328
BROWNE_HCMV_INFECTION_16HR_UP	0.023144	-0.0125952	0.824894	0.0206638	-0.083075	0.84685	0.0234152	-0.0702945	0.108231	0.0224167	-0.0147192	0.999279	0.739709	-0.045171
BROWNE_HCMV_INFECTION_18HR_DN	0.0663647	-0.0253162	0.408013	0.0660815	0.0128548	0.931127	0.0690617	0.0172358	0.821438	0.066946	0.00793028	0.999279	0.969168	0.00317617
BROWNE_HCMV_INFECTION_18HR_UP	0.0529275	0.00325591	0.932754	0.0521639	-0.0293971	0.71796	0.0512237	-0.0339411	0.321696	0.0555906	-0.00259867	0.999279	0.929781	-0.0156702
BROWNE_HCMV_INFECTION_1HR_DN	0.0374606	0.0291648	0.463264	0.0377191	0.0290463	0.779487	0.0359762	-0.028999	0.446365	0.0382488	-0.00659096	0.999279	0.887092	0.00565529
BROWNE_HCMV_INFECTION_1HR_UP	0.0374302	0.0717358	0.588442	0.0356145	-0.0280144	0.97453	0.0365611	-0.0118917	0.942755	0.0349317	0.052871	0.999279	0.996321	0.0211752
BROWNE_HCMV_INFECTION_20HR_DN	0.0613359	0.0223587	0.534903	0.0640997	0.0673703	0.425614	0.0625674	0.0312995	0.202795	0.0597542	0.000696305	0.999279	0.630171	0.0304312
BROWNE_HCMV_INFECTION_20HR_UP	0.0385132	0.00887657	0.789632	0.0385474	-0.0116136	0.99907	0.0356236	-0.0532867	0.212151	0.0389291	-0.0192207	0.999279	0.893165	-0.0188111
BROWNE_HCMV_INFECTION_24HR_DN	0.107287	-0.0169206	0.429818	0.104692	0.0303439	0.645147	0.111736	0.0192982	0.128389	0.104972	0.0200668	0.999279	0.572381	0.0131971
BROWNE_HCMV_INFECTION_24HR_UP	0.0637923	0.0305629	0.501571	0.0632754	-0.0131346	0.885251	0.0626236	0.0343835	0.300656	0.0628203	-0.0301344	0.999279	0.854515	0.00541934
BROWNE_HCMV_INFECTION_2HR_DN	0.131122	-0.0519002	0.833525	0.124984	0.0584907	0.531434	0.142862	0.10269	0.0348789	0.122649	-0.090643	0.999279	0.400821	0.00465941
BROWNE_HCMV_INFECTION_2HR_UP	0.142202	0.0671521	0.302475	0.139165	-0.00487201	0.996932	0.135982	0.0483684	0.395303	0.135152	0.052884	0.999279	0.833386	0.0408831
BROWNE_HCMV_INFECTION_30MIN_DN	0.0346715	0.0310093	0.847485	0.0343629	0.0358967	0.941869	0.0380785	0.081507	0.108044	0.0369255	0.061042	0.999279	0.767931	0.0523637
BROWNE_HCMV_INFECTION_30MIN_UP	0.0909586	0.0227088	0.879274	0.100134	0.0124104	0.985519	0.0886447	-0.00623885	0.915193	0.0943625	0.0162087	0.999279	0.999899	0.0112723
BROWNE_HCMV_INFECTION_48HR_DN	0.0863821	-0.00560649	0.801902	0.0877879	0.0442969	0.483636	0.0875422	-0.00212268	0.816144	0.086806	0.0460666	0.999279	0.970319	0.0206586
BROWNE_HCMV_INFECTION_48HR_UP	0.0498596	-0.0734568	0.00410544	0.048538	-0.0607104	0.595523	0.0509524	-0.0829309	0.000193899	0.0524014	-0.0448967	0.999279	0.000301435	-0.0654987
BROWNE_HCMV_INFECTION_4HR_DN	0.0445455	0.0257017	0.469265	0.043951	0.00664662	0.999479	0.042464	-0.00600714	0.872795	0.043123	-0.00619136	0.999279	0.986841	0.00503746
BROWNE_HCMV_INFECTION_4HR_UP	0.0653419	0.0475393	0.824894	0.0596065	-0.0164183	0.919441	0.0608758	-0.0558675	0.595139	0.0651912	-0.0164083	0.999279	0.991066	-0.0102887
BROWNE_HCMV_INFECTION_6HR_DN	0.0422612	-0.0274529	0.624235	0.0486213	0.176851	0.500288	0.0438264	-0.0342746	0.388963	0.0418539	-0.0314991	0.999279	0.836978	0.0209062
BROWNE_HCMV_INFECTION_6HR_UP	0.0466707	-0.121433	0.0478314	0.043735	-0.155038	0.578182	0.046498	-0.0930201	0.252654	0.0480349	-0.0554527	0.999279	0.27006	-0.106236
BROWNE_HCMV_INFECTION_8HR_DN	0.0430061	-0.0240478	0.961807	0.0511447	0.115317	0.531434	0.0471647	0.0774823	0.0451364	0.0489336	0.0625129	0.999279	0.479661	0.0578162
BROWNE_HCMV_INFECTION_8HR_UP	0.0787423	0.0712482	0.374519	0.0689316	0.0128707	0.880241	0.0703224	-0.0395367	0.608681	0.0766373	-0.00333982	0.999279	0.920239	0.0103106
BROWNE_INTERFERON_RESPONSIVE_GENES	0.0560992	-0.170681	0.334688	0.0632598	0.031318	0.910013	0.0612912	0.0745141	0.151341	0.0656544	-0.0372087	0.999279	0.629808	-0.0255145
BRUECKNER_TARGETS_OF_MIRLET7A3_DN	0.145655	0.0237188	0.801902	0.13859	0.0178145	0.762057	0.144176	0.0122878	0.713373	0.141438	0.00658484	0.999279	0.989681	0.0151015
BRUECKNER_TARGETS_OF_MIRLET7A3_UP	0.0784048	-0.112974	0.00208308	0.0775469	0	0.98588	0.0821589	-0.0236884	0.591459	0.0813084	-0.00117044	0.999279	0.0979467	-0.0344582
BRUINS_UVC_RESPONSE_EARLY_LATE	0.0593343	0.00876631	0.703016	0.0545826	-0.0125431	0.970905	0.061645	0.0138088	0.844862	0.0564522	-0.0209777	0.999279	0.997515	-0.00273645
BRUINS_UVC_RESPONSE_LATE	0.101661	-0.00526505	0.69088	0.103161	0.0139524	0.722975	0.103484	0.00509055	0.632355	0.103229	0.0135884	0.999279	0.970149	0.00684157
BRUINS_UVC_RESPONSE_MIDDLE	0.0252598	-0.0488089	0.977168	0.0299006	-0.0202792	0.927102	0.0259325	-0.0426729	0.538932	0.0293073	-0.0120418	0.999279	0.99373	-0.0309507
BRUINS_UVC_RESPONSE_VIA_TP53_GROUP_A	0.039043	-0.000428712	0.755153	0.0414536	0.0186113	0.881544	0.0393014	-0.00286676	0.883245	0.0407372	0.0218583	0.999279	0.997814	0.00929352
BRUINS_UVC_RESPONSE_VIA_TP53_GROUP_B	0.0672341	-0.0399466	0.741908	0.0743377	0.029059	0.730224	0.070894	0.0225883	0.823973	0.0736052	0.0222854	0.999279	0.990639	0.00849655
BRUINS_UVC_RESPONSE_VIA_TP53_GROUP_C	0.0402958	0.103746	0.250024	0.0388931	0.052276	0.802001	0.0370818	-0.0195629	0.912688	0.0373372	-0.0275518	0.999279	0.906971	0.0272269
BRUINS_UVC_RESPONSE_VIA_TP53_GROUP_D	0.0416056	-0.010188	0.560537	0.0434825	0.0481299	0.900945	0.0420019	-0.0434434	0.245767	0.041547	-0.0171273	0.999279	0.841044	-0.00565719
BRUNO_HEMATOPOIESIS	0.135754	0.0191602	0.553365	0.144295	0.0393472	0.862221	0.128569	-0.0292091	0.274102	0.147271	0.0509376	0.999279	0.850761	0.020059
BUFFA_HYPOXIA_METAGENE	0.251605	0.00147811	0.999822	0.254902	0.00411889	0.951323	0.245613	-0.0174341	0.402799	0.25436	-0.0200197	0.999279	0.98336	-0.0079642
BURTON_ADIPOGENESIS_1	0.192833	0.0296679	0.934768	0.204214	0.0431728	0.919441	0.179553	0.0316014	0.862907	0.210409	-0.0125676	0.999279	0.999735	0.0229686
BURTON_ADIPOGENESIS_10	0.0881762	0.0334452	0.833607	0.081197	-0.0183841	0.999479	0.0954778	0.0722074	0.305218	0.0901969	0.0389887	0.999279	0.949604	0.0315643
BURTON_ADIPOGENESIS_11	0.0935425	0.00449929	0.968063	0.084513	0.0534346	0.904067	0.0942124	-0.0760175	0.176465	0.0824595	-0.0399553	0.999279	0.880011	-0.0145097
BURTON_ADIPOGENESIS_12	0.100224	0.199381	0.0390401	0.0745446	0.00487334	0.900255	0.0906138	0.0278212	0.947607	0.0786247	-0.0556826	0.999279	0.557749	0.0440982
BURTON_ADIPOGENESIS_2	0.0905491	-0.0767867	0.226973	0.0887222	0.00598699	0.911263	0.09703	-0.0493016	0.0893752	0.0896816	-0.0249041	0.999279	0.435136	-0.0362514
BURTON_ADIPOGENESIS_3	0.0615615	0.0469514	0.885058	0.0447411	0.0299938	0.881544	0.0616182	0.372208	0.161632	0.0478297	-0.0631852	0.999279	0.844026	0.0964919
BURTON_ADIPOGENESIS_4	0.156015	-0.0507942	0.344393	0.148655	0.00141819	0.873919	0.16615	0.00840894	0.994647	0.151074	-0.0283899	0.999279	0.965636	-0.0173392
BURTON_ADIPOGENESIS_5	0.130261	-0.0299508	0.772125	0.12184	-0.006562	0.967754	0.131595	0.0268812	0.667985	0.127145	-0.00902703	0.999279	0.994371	-0.00466466
BURTON_ADIPOGENESIS_6	0.0981863	-0.00506444	0.789632	0.101298	-0.00327462	0.970905	0.0941064	-0.0264656	0.931873	0.0991824	-0.0148748	0.999279	0.999589	-0.0124198
BURTON_ADIPOGENESIS_7	0.205894	-0.015176	0.794423	0.216241	0.0347133	0.700352	0.205858	-0.0468447	0.109603	0.205887	-0.0130037	0.999279	0.6924	-0.0100778
BURTON_ADIPOGENESIS_8	0.174004	0.0301989	0.429818	0.182644	0.0630835	0.384043	0.17482	0.0258122	0.240136	0.173197	-0.00244266	0.999279	0.596144	0.029163
BURTON_ADIPOGENESIS_9	0.117437	0.0130913	0.691406	0.12949	0.0812324	0.532891	0.117581	0.0583715	0.154138	0.131489	0.0434694	0.999279	0.676532	0.0490412
BURTON_ADIPOGENESIS_PEAK_AT_0HR	0.0745418	0.0111837	0.64614	0.0797684	0	0.80686	0.0739662	0.0301778	0.544583	0.0763435	0.0196035	0.999279	0.960811	0.0152412
BURTON_ADIPOGENESIS_PEAK_AT_16HR	0.0786149	-0.162058	0.180572	0.0702483	-0.168999	0.559609	0.0810353	-0.00856791	0.90928	0.0785869	-0.0407704	0.999279	0.781235	-0.0950989
BURTON_ADIPOGENESIS_PEAK_AT_24HR	0.0788796	0.0709713	0.730273	0.0706859	0.0165646	0.970905	0.0734016	0.08917	0.766869	0.0721834	-0.00015507	0.999279	0.99644	0.0441377
BURTON_ADIPOGENESIS_PEAK_AT_2HR	0.211615	-0.0185235	0.81145	0.220922	0.0319326	0.844244	0.205975	0.0259787	0.995871	0.215485	-0.0440846	0.999279	0.999338	-0.00117419
BURTON_ADIPOGENESIS_PEAK_AT_8HR	0.161022	0.0116794	0.892863	0.147341	-0.00222295	0.965325	0.154709	-0.0854941	0.00608374	0.152453	-0.0711643	0.999279	0.231484	-0.0368005
BUYTAERT_PHOTODYNAMIC_THERAPY_STRESS_DN	0.060813	0.0300328	0.436348	0.0574634	-0.0357094	0.878241	0.0590561	0.0257157	0.484971	0.0606849	0.026431	0.999279	0.909258	0.0116175
BUYTAERT_PHOTODYNAMIC_THERAPY_STRESS_UP	0.0929197	0.00683809	0.928209	0.0907044	0.0446622	0.84685	0.0899666	-0.0558702	0.212983	0.0924491	0.0214554	0.999279	0.893213	0.00427139
BYSTROEM_CORRELATED_WITH_IL5_DN	0.0750405	-0.0404549	0.623864	0.0705585	0.0534993	0.77196	0.0808069	-0.0254823	0.688171	0.0716093	0.0327779	0.999279	0.973881	0.00508501
BYSTROEM_CORRELATED_WITH_IL5_UP	0.114445	0.0353789	0.407887	0.108419	-0.0175891	0.980013	0.111407	-0.0142372	0.504843	0.113637	0.034436	0.999279	0.921023	0.00949714
BYSTRYKH_HEMATOPOIESIS_STEM_CELL_AND_BRAIN_QTL_CIS	0.132322	0.05521	0.13374	0.125716	-0.0400593	0.648449	0.12352	-0.0380156	0.042161	0.127501	-0.0376545	0.999279	0.189326	-0.0151299
BYSTRYKH_HEMATOPOIESIS_STEM_CELL_AND_BRAIN_QTL_TRANS	0.0908688	-0.0270395	0.499015	0.0876768	-0.000729309	0.970905	0.0934056	-0.0202851	0.202793	0.0888738	-0.0128962	0.999279	0.795077	-0.0152375
BYSTRYKH_HEMATOPOIESIS_STEM_CELL_QTL_CIS	0.106342	-0.0247681	0.728841	0.110917	-0.033391	0.535398	0.105902	-0.0358233	0.0348789	0.110826	-0.0258684	0.999279	0.377579	-0.0299627
BYSTRYKH_HEMATOPOIESIS_STEM_CELL_QTL_TRANS	0.0917121	0.00974749	0.552023	0.0888535	0.00927917	0.789361	0.0912409	0.00456207	0.390377	0.0895274	-0.00448901	0.999279	0.895738	0.00477493
BYSTRYKH_HEMATOPOIESIS_STEM_CELL_SCP2_QTL_TRANS	0.0892837	0.0173736	0.353205	0.088937	0.0288691	0.655269	0.0897169	0.0326485	0.46285	0.0864385	0.0443037	0.999279	0.812528	0.0307987
CADWELL_ATG16L1_TARGETS_DN	0.0367452	-0.189011	0.318981	0.0418369	0.037616	0.865516	0.0397743	-0.0394521	0.40547	0.0497892	0.0641816	0.999279	0.821221	-0.0316665
CADWELL_ATG16L1_TARGETS_UP	0.00933744	0.0187935	0.81097	0.0110293	0	0.813571	0.00920048	-0.0175787	0.852129	0.0105862	-0.0228745	0.999279	0.997083	-0.00541492
CAFFAREL_RESPONSE_TO_THC_24HR_5_DN	0.20506	0.00749843	0.427451	0.190041	-0.00253408	0.999479	0.199745	0.0297553	0.534052	0.19894	0.000440585	0.999279	0.937037	0.00879007
CAFFAREL_RESPONSE_TO_THC_24HR_5_UP	0.228048	-0.00735565	0.761512	0.210787	0.0213301	0.821898	0.225941	0.00279391	0.296721	0.218902	0.0315152	0.999279	0.909149	0.0120709
CAFFAREL_RESPONSE_TO_THC_DN	0.172363	0.0350184	0.400902	0.157902	0.0353383	0.946877	0.175038	0.0591204	0.324767	0.157543	-0.0188549	0.999279	0.839777	0.0276555
CAFFAREL_RESPONSE_TO_THC_UP	0.0999281	0.0214565	0.961807	0.0966926	0.0458514	0.722606	0.0932712	-0.0828988	0.288885	0.0926514	-0.0229794	0.999279	0.920319	-0.0096426
CAIRO_HEPATOBLASTOMA_CLASSES_DN	0.066066	-0.00726822	0.712802	0.0682675	0.032065	0.675777	0.0670829	0.00821857	0.778657	0.0689921	0.0613593	0.999279	0.982134	0.0235936
CAIRO_HEPATOBLASTOMA_CLASSES_UP	0.215507	0.0380407	0.938934	0.190476	0.0020027	0.999479	0.212942	0.0332726	0.125189	0.193772	-0.01882	0.999279	0.830598	0.013624
CAIRO_HEPATOBLASTOMA_DN	0.0282592	-0.0151269	0.673424	0.0338912	0.0272173	0.969288	0.029769	-0.0108272	0.693264	0.0336481	0.0509459	0.999279	0.991162	0.0130523
CAIRO_HEPATOBLASTOMA_UP	0.0949228	0.0104705	0.886534	0.0886585	0.0384543	0.687342	0.0987272	-0.00693598	0.61098	0.089313	0.00133724	0.999279	0.981693	0.0108315
CAIRO_LIVER_DEVELOPMENT_DN	0.0333644	-0.0880235	0.284133	0.0374609	-0.00530566	0.996861	0.0353293	0.00180156	0.905476	0.0367976	0.0851349	0.999279	0.950524	-0.00159817
CAIRO_LIVER_DEVELOPMENT_UP	0.0913467	0.0266123	0.217458	0.0945246	0.0300641	0.605276	0.0912661	-0.00123658	0.914666	0.0941001	0.00637693	0.999279	0.835277	0.0154542
CAIRO_PML_TARGETS_BOUND_BY_MYC_UP	0.224855	0.0192767	0.743177	0.207361	-0.0107434	0.976173	0.219793	0.0445125	0.0795971	0.21267	-0.0100319	0.999279	0.680251	0.0107535
CAMPS_COLON_CANCER_COPY_NUMBER_DN	0.0811388	0.0511853	0.203925	0.0829798	0.0894648	0.364035	0.0846607	0.0492546	0.41457	0.079111	0.070803	0.999279	0.540577	0.0651769
CAMPS_COLON_CANCER_COPY_NUMBER_UP	0.0847525	-0.0214417	0.776701	0.084152	0.0367899	0.737654	0.0846618	-0.0212743	0.501252	0.0796707	-0.0343648	0.999279	0.961885	-0.0100727
CARD_MIR302A_TARGETS	0.11783	0.0883769	0.0500226	0.104521	0.0449269	0.610017	0.110737	-0.00881534	0.93153	0.102689	-0.0307142	0.999279	0.523487	0.0234436
CASORELLI_ACUTE_PROMYELOCYTIC_LEUKEMIA_DN	0.149783	0.0301395	0.683327	0.135812	0.0248189	0.768156	0.150491	0.0330366	0.390017	0.139297	0.00111259	0.999279	0.922991	0.0222769
CASORELLI_ACUTE_PROMYELOCYTIC_LEUKEMIA_UP	0.132907	-0.00789205	0.640222	0.134744	0	0.912098	0.134877	-0.00384123	0.807289	0.133784	-0.0286639	0.999279	0.992616	-0.0100993
CASORELLI_APL_SECONDARY_VS_DE_NOVO_UP	0.115091	-0.0227053	0.773485	0.116239	-0.0311959	0.875773	0.117613	-0.00103853	0.67966	0.120888	0.0361631	0.999279	0.991797	-0.00469416
CASTELLANO_NRAS_TARGETS_UP	0.0858703	-0.0989099	0.640222	0.0925779	-0.0532682	0.768156	0.0886429	-0.022267	0.475342	0.0991345	-0.00504401	0.999279	0.93998	-0.0448723
CEBALLOS_TARGETS_OF_TP53_AND_MYC_DN	0.149898	0.0357552	0.703581	0.144394	0.0627798	0.488264	0.147394	0.0508774	0.137621	0.137403	-0.0907972	0.999279	0.635484	0.0146538
CERIBELLI_GENES_INACTIVE_AND_BOUND_BY_NFY	0.00580974	-0.0423786	0.885373	0.00604591	0.236234	0.969288	0.00595144	-0.383201	0.395303	0.00472337	0.395929	0.999279	0.975584	0.0516458
CERVERA_SDHB_TARGETS_1_DN	0.013939	0.221436	0.613963	0.0222469	0.0550014	0.974615	0.00291262	-1.60768	0.201626	0.0318169	0.0643019	0.999279	0.835685	-0.316736
CERVERA_SDHB_TARGETS_1_UP	0.0497106	0.0204879	0.973582	0.0513318	0.0778341	0.519215	0.0524605	0.108041	0.0829545	0.0515259	0.0677949	0.999279	0.60867	0.0685395
CERVERA_SDHB_TARGETS_2	0.0302061	-0.0668543	0.299701	0.0386339	0.0451189	0.970905	0.0314368	-0.0798084	0.180323	0.0356975	0.0248549	0.999279	0.65883	-0.0191722
CHANDRAN_METASTASIS_DN	0.0573032	-0.0198368	0.906273	0.0592512	0.0365123	0.805962	0.0583383	0.0255897	0.504843	0.0569418	0.00676189	0.999279	0.981112	0.0122568
CHANDRAN_METASTASIS_TOP50_DN	0.154567	0.0402434	0.272244	0.150531	0.00830147	0.855821	0.1497	0.0482584	0.0205542	0.146677	0.0124696	0.999279	0.220236	0.0273182
CHANDRAN_METASTASIS_TOP50_UP	0.243464	0.0817198	0.0204021	0.225055	0.0691726	0.531434	0.238046	0.0417892	0.140086	0.226329	0.000442884	0.999279	0.112504	0.0482811
CHANDRAN_METASTASIS_UP	0.111528	0.0341921	0.723223	0.105139	0.0864777	0.56435	0.110543	-0.00955725	0.391328	0.0999641	-0.0269043	0.999279	0.885595	0.0210521
CHANG_IMMORTALIZED_BY_HPV31_DN	0.109497	-0.089014	0.117222	0.121446	-0.00362855	0.881989	0.114354	-0.0470864	0.158466	0.126078	0.0110411	0.999279	0.411862	-0.032172
CHANG_IMMORTALIZED_BY_HPV31_UP	0.0468468	0.10808	0.187951	0.050743	0.0507805	0.916726	0.0447642	-0.025416	0.823816	0.0504388	0.135698	0.999279	0.865494	0.0672854
CHANGOLKAR_H2AFY_TARGETS_DN	0.0388937	0.134156	0.0629921	0.0301325	-0.0882577	0.802676	0.0353459	-0.0835714	0.342241	0.0312335	-0.0962574	0.999279	0.422316	-0.0334825
CHANGOLKAR_H2AFY_TARGETS_UP	0.0564414	0.0551811	0.378367	0.059432	0.0856827	0.535398	0.0536887	-0.0958646	0.0215216	0.0553705	0.0120381	0.999279	0.209051	0.0142593
CHARAFE_BREAST_CANCER_BASAL_VS_MESENCHYMAL_DN	0.0320893	0.138274	0.123189	0.0416155	0.132564	0.609249	0.0338947	0.156735	0.220688	0.0373555	0.137228	0.999279	0.413936	0.1412
CHARAFE_BREAST_CANCER_BASAL_VS_MESENCHYMAL_UP	0.0639464	-0.00737107	0.737348	0.067972	-0.0208996	0.805888	0.0636556	-0.0193653	0.333544	0.0648128	-0.0371322	0.999279	0.918517	-0.0211921
CHARAFE_BREAST_CANCER_LUMINAL_VS_BASAL_DN	0.111563	-0.0287157	0.266222	0.11327	0.023041	0.703997	0.11417	-0.0203274	0.299784	0.114685	0.00720563	0.999279	0.674136	-0.00469913
CHARAFE_BREAST_CANCER_LUMINAL_VS_BASAL_UP	0.0452208	-0.0269724	0.614536	0.0460243	0.0133481	0.78112	0.0467315	-0.0208415	0.492089	0.0452774	-0.0149805	0.999279	0.94122	-0.0123616
CHARAFE_BREAST_CANCER_LUMINAL_VS_MESENCHYMAL_DN	0.106116	0.0211697	0.701509	0.106098	0.0670152	0.364035	0.104954	0.00779183	0.617665	0.10388	0.000252878	0.999279	0.883531	0.0240574
CHARAFE_BREAST_CANCER_LUMINAL_VS_MESENCHYMAL_UP	0.0300508	-0.120763	0.0262738	0.0364087	-0.0437665	0.837084	0.0341497	-0.0137314	0.585684	0.0356429	-0.0223591	0.999279	0.367753	-0.050155
CHAUHAN_RESPONSE_TO_METHOXYESTRADIOL_DN	0.332317	0.0163384	0.327738	0.328857	0.00531132	0.885162	0.326826	0.014691	0.200686	0.333682	0.00677339	0.999279	0.682076	0.0107785
CHAUHAN_RESPONSE_TO_METHOXYESTRADIOL_UP	0.245833	0.00763939	0.926541	0.225482	0.0237654	0.825292	0.239537	0.0268343	0.435425	0.234863	0.00129654	0.999279	0.974224	0.0148839
CHEBOTAEV_GR_TARGETS_DN	0.0199145	-0.154054	0.0829853	0.0262929	0.0281876	0.975248	0.021167	-0.0280355	0.649284	0.0246927	0.0283058	0.999279	0.659158	-0.0313991
CHEBOTAEV_GR_TARGETS_UP	0.0152433	-0.074528	0.487583	0.0164787	0	0.962354	0.0146674	-0.100571	0.108839	0.0149042	0.0158217	0.999279	0.652772	-0.0398193
CHEMNITZ_RESPONSE_TO_PROSTAGLANDIN_E2_DN	0.0405548	-0.032713	0.631682	0.0439991	-0.0215134	0.768501	0.0426307	-0.023628	0.280141	0.0436918	-0.00485505	0.999279	0.857868	-0.0206774
CHEMNITZ_RESPONSE_TO_PROSTAGLANDIN_E2_UP	0.0675122	0.0404191	0.813555	0.0616902	0.0288816	0.895369	0.0698076	0.126786	0.134014	0.063861	0.0611921	0.999279	0.793755	0.0643198
CHEN_ETV5_TARGETS_SERTOLI	0.0359134	0.0270479	0.333878	0.0345527	-0.0188156	0.682656	0.0344726	-0.012231	0.395303	0.0342058	-0.012326	0.999279	0.77714	-0.00408118
CHEN_HOXA5_TARGETS_9HR_DN	0.0706169	-0.0215569	0.87413	0.0725166	0.012886	0.820938	0.0746776	-0.0175686	0.74673	0.0694319	0.0138267	0.999279	0.996131	-0.0031032
CHEN_HOXA5_TARGETS_9HR_UP	0.108537	0.00601038	0.9866	0.10083	0.0423617	0.914259	0.105201	-0.036053	0.414216	0.100473	-0.0522053	0.999279	0.981905	-0.00997155
CHEN_LIVER_METABOLISM_QTL_CIS	0.0549853	-0.0701366	0.394399	0.0508555	-0.179404	0.00537986	0.0554741	-0.134971	1.33619e-07	0.0582807	-0.04154	0.999279	5.76691e-07	-0.106513
CHEN_LUNG_CANCER_SURVIVAL	0.390727	0.000854368	0.808513	0.396175	0.0138247	0.825292	0.385483	0.000625387	0.778657	0.394839	-0.00337692	0.999279	0.99542	0.00298188
CHEN_LVAD_SUPPORT_OF_FAILING_HEART_DN	0.0516875	-0.0706451	0.235683	0.0547031	0.0511787	0.873667	0.0500284	-0.0352499	0.568206	0.0546023	0.051024	0.999279	0.829803	-0.000923089
CHEN_LVAD_SUPPORT_OF_FAILING_HEART_UP	0.115826	-0.0119655	0.895807	0.11331	0	0.911212	0.11054	-0.0428184	0.610345	0.118878	0.000889989	0.999279	0.994318	-0.0134735
CHEN_METABOLIC_SYNDROM_NETWORK	0.0931023	-0.013505	0.689733	0.0979611	0.0150616	0.873919	0.093352	-0.00308217	0.817187	0.0977183	0.0208557	0.999279	0.993992	0.00483252
CHEN_NEUROBLASTOMA_COPY_NUMBER_GAINS	0.0912338	0.0456302	0.302008	0.0858081	-0.0246669	0.813959	0.0883594	-0.0110658	0.834628	0.0824234	-0.0549108	0.999279	0.92329	-0.0112533
CHENG_IMPRINTED_BY_ESTRADIOL	0.0376277	-0.0777534	0.139709	0.0375341	0.0440886	0.864262	0.0378932	-0.0491422	0.0564769	0.036498	0.00014787	0.999279	0.266613	-0.0206648
CHENG_RESPONSE_TO_NICKEL_ACETATE	0.129742	0.0192015	0.712465	0.130689	0.00118399	0.864262	0.129045	0.0226503	0.330411	0.126767	-0.0210955	0.999279	0.922143	0.00548509
CHEOK_RESPONSE_TO_HD_MTX_DN	0.0887993	0.0558061	0.504399	0.092641	0.0641749	0.750827	0.0836981	-0.049615	0.420295	0.0974588	0.0785464	0.999279	0.885029	0.0372281
CHEOK_RESPONSE_TO_MERCAPTOPURINE_AND_HD_MTX_DN	0.047922	0.34592	0.00554225	0.0318709	-0.0401571	0.97453	0.0308685	0.000600747	0.732262	0.0352122	0.113898	0.999279	0.197933	0.105066
CHESLER_BRAIN_HIGHEST_EXPRESSION	0.270454	0.0136936	0.64614	0.274361	-0.013528	0.944572	0.274401	-0.0231251	0.158466	0.272144	-0.0223297	0.999279	0.791844	-0.0113223
CHESLER_BRAIN_HIGHEST_GENETIC_VARIANCE	0.0967662	-0.0118405	0.712465	0.103558	0.0367289	0.80393	0.10233	0.0090744	0.985153	0.101203	-0.00872824	0.999279	0.997148	0.00630864
CHESLER_BRAIN_QTL_CIS	0.0999514	-0.0266858	0.221832	0.104507	-0.0128228	0.808918	0.0992268	-0.0530574	0.0144869	0.105281	-0.0250793	0.999279	0.155436	-0.0294113
CHIANG_LIVER_CANCER_SUBCLASS_CTNNB1_DN	0.0559483	-0.0792029	0.427018	0.060228	0.0161535	0.904067	0.0586633	-0.0370283	0.2961	0.0599602	0.0140181	0.999279	0.825305	-0.0215149
CHIANG_LIVER_CANCER_SUBCLASS_CTNNB1_UP	0.00882425	-0.0364002	0.882723	0.00905998	-0.0947405	0.864262	0.00920346	-0.129008	0.0344367	0.00917784	-0.0389404	0.999279	0.506751	-0.0747722
CHIANG_LIVER_CANCER_SUBCLASS_INTERFERON_DN	0	NA	0.741473	0.00180716	0.894818	1	0	NA	0.0378214	0	#NAME?	0.999279	0.520599	NA
CHIANG_LIVER_CANCER_SUBCLASS_POLYSOMY7_DN	0.0484605	0.095589	0.364733	0.0470735	0.129788	0.682656	0.0505409	0.139128	0.102071	0.0466852	0.0874628	0.999279	0.499768	0.112992
CHIANG_LIVER_CANCER_SUBCLASS_POLYSOMY7_UP	0.0140325	0.118251	0.425264	0.0163638	0.0530868	0.951323	0.0157057	0.282635	0.00853367	0.016916	0.0498448	0.999279	0.183231	0.125955
CHIANG_LIVER_CANCER_SUBCLASS_PROLIFERATION_DN	0.0137466	0.0474393	0.687768	0.0174158	0.0784797	0.970905	0.0143331	-0.00876022	0.544583	0.015809	0.0462937	0.999279	0.980249	0.0408631
CHIANG_LIVER_CANCER_SUBCLASS_PROLIFERATION_UP	0.0726537	0.0387234	0.719788	0.068557	0.0407433	0.782913	0.0696454	0.0833782	0.117658	0.068665	0.0196437	0.999279	0.710953	0.0456221
CHIANG_LIVER_CANCER_SUBCLASS_UNANNOTATED_DN	0.195283	0.012118	0.695067	0.188237	-0.000183417	0.928567	0.196051	0.0180173	0.197098	0.191705	0.00476577	0.999279	0.845648	0.00867942
CHIANG_LIVER_CANCER_SUBCLASS_UNANNOTATED_UP	0.0831108	0.0452705	0.560094	0.0821894	0.0654278	0.873667	0.0800981	-9.32305e-05	0.960808	0.0767387	-0.0396415	0.999279	0.992527	0.0177409
CHIARADONNA_NEOPLASTIC_TRANSFORMATION_CDC25_DN	0.115396	-0.0156151	0.678984	0.122097	-0.00231291	0.928567	0.118063	-0.0141401	0.791424	0.118643	0.0054771	0.999279	0.994362	-0.00664776
CHIARADONNA_NEOPLASTIC_TRANSFORMATION_CDC25_UP	0.135871	-0.0385657	0.652347	0.133546	-0.0080487	0.978147	0.133218	-0.0547451	0.083588	0.135425	-0.0193392	0.999279	0.662496	-0.0301747
CHIARADONNA_NEOPLASTIC_TRANSFORMATION_KRAS_CDC25_DN	0.117537	0.133853	0.325775	0.123918	0.0241636	0.951323	0.104722	-0.0328919	0.379238	0.114697	0.0123064	0.999279	0.83068	0.0343579
CHIARADONNA_NEOPLASTIC_TRANSFORMATION_KRAS_CDC25_UP	0.236717	-0.080249	0.00178303	0.24629	0.0424913	0.717473	0.251104	-0.026543	0.373291	0.242002	-0.00694132	0.999279	0.053654	-0.0178105
CHIARADONNA_NEOPLASTIC_TRANSFORMATION_KRAS_DN	0.0732822	-0.0306957	0.747839	0.0813177	-0.0101743	0.999479	0.0747882	0.0186925	0.905873	0.0794379	0.0319509	0.999279	0.999288	0.00244336
CHIARADONNA_NEOPLASTIC_TRANSFORMATION_KRAS_UP	0.147838	-0.053821	0.513304	0.148083	0.0607465	0.61397	0.154612	0.0351419	0.225509	0.150388	0.0128951	0.999279	0.72622	0.0137407
CHIARETTI_ACUTE_LYMPHOBLASTIC_LEUKEMIA_ZAP70	0.020446	0.00841925	0.651681	0.0251085	-0.00843874	0.878241	0.0179702	-0.188603	0.0589656	0.0206386	-0.158483	0.999279	0.560641	-0.0867764
CHIARETTI_T_ALL_REFRACTORY_TO_THERAPY	0.0811234	0.0643097	0.600909	0.0784743	0.0710779	0.916726	0.074258	-0.0150115	0.692013	0.0767545	-0.0390915	0.999279	0.983076	0.0203212
CHIBA_RESPONSE_TO_TSA	0.269405	-0.00175932	0.903352	0.275496	0.016601	0.89191	0.26078	-0.0145819	0.651424	0.280475	-0.0105544	0.999279	0.995662	-0.00257365
CHIBA_RESPONSE_TO_TSA_UP	0.163908	-0.0394027	0.231851	0.175054	0.0132337	0.980013	0.17758	0.0267396	0.594029	0.171878	0.0041387	0.999279	0.85651	0.00117729
CHICAS_RB1_TARGETS_CONFLUENT	0.105838	-0.00102629	0.668208	0.10912	0.0290939	0.53767	0.104939	0.00394676	0.399597	0.110234	0.0333019	0.999279	0.86749	0.0163291
CHICAS_RB1_TARGETS_GROWING	0.0774316	0.0325067	0.843577	0.062103	-0.00939478	0.951323	0.0791924	0.0813078	0.489787	0.0633251	-0.113408	0.999279	0.984767	-0.00224707
CHICAS_RB1_TARGETS_LOW_SERUM	0.274425	0.0642591	0.00951731	0.2694	0.00144332	0.938706	0.24026	0.0259171	0.510938	0.276975	0.000266137	0.999279	0.214464	0.0229714
CHICAS_RB1_TARGETS_SENESCENT	0.0951529	-0.0174217	0.789074	0.0907637	0.0215803	0.992979	0.098611	0.0289599	0.500475	0.0942109	0.0145747	0.999279	0.984641	0.0119233
CHIN_BREAST_CANCER_COPY_NUMBER_UP	0.113814	-0.0592453	0.394399	0.115728	0.0716002	0.550298	0.122635	0.0380244	0.176605	0.121914	0.0682244	0.999279	0.588691	0.0296509
CHNG_MULTIPLE_MYELOMA_HYPERPLOID_DN	0.088325	-0.0163086	0.946389	0.0829573	-0.0524982	0.916726	0.0916348	-0.0247679	0.428386	0.0874944	-0.00896593	0.999279	0.981589	-0.0256352
CHNG_MULTIPLE_MYELOMA_HYPERPLOID_UP	0.615119	-0.00304182	0.649762	0.620799	-0.00617197	0.862221	0.604294	-0.00228412	0.902156	0.617569	-0.0128703	0.999279	0.994714	-0.00609206
CHO_NR4A1_TARGETS	0.0655152	-0.262657	0.0179755	0.0748451	0.00695276	0.928905	0.073303	-0.0465386	0.74535	0.0751536	-0.0230053	0.999279	0.361698	-0.081312
CHOI_ATL_STAGE_PREDICTOR	0.224844	-0.00669617	0.872893	0.214427	-0.000572067	0.916726	0.230619	0.020737	0.316239	0.219087	-0.000671854	0.999279	0.949068	0.00319922
CHOW_RASSF1_TARGETS_DN	0.205819	0.00653179	0.992892	0.217831	0.0404637	0.673028	0.206228	0.0351123	0.0275204	0.212178	0.0291188	0.999279	0.434125	0.0278067
CHOW_RASSF1_TARGETS_UP	0.0958114	0.044107	0.756912	0.091484	0.104763	0.687342	0.0899584	0.0210616	0.953192	0.0864216	-0.0773077	0.999279	0.994187	0.023156
CHUNG_BLISTER_CYTOTOXICITY_DN	0.0312347	-0.00805527	0.770903	0.0324169	-0.083465	0.642784	0.0280238	-0.110538	0.0479607	0.032249	-0.0431608	0.999279	0.485788	-0.0613047
CHUNG_BLISTER_CYTOTOXICITY_UP	0.11392	-0.0196923	0.879569	0.109286	-0.0060859	0.987886	0.114311	0.0293785	0.060948	0.10999	-0.0149962	0.999279	0.660903	-0.00284898
CHYLA_CBFA2T3_TARGETS_DN	0.021017	-0.0937971	0.157074	0.0252393	-0.00820563	0.796764	0.022841	0.00932981	0.74535	0.0230079	-0.0517858	0.999279	0.784376	-0.0361147
CHYLA_CBFA2T3_TARGETS_UP	0.0445449	-0.0124164	0.343933	0.0476023	0.00606092	0.951323	0.0440948	-0.0677238	0.0162625	0.0465383	-0.00506804	0.999279	0.233342	-0.0197868
CLASPER_LYMPHATIC_VESSELS_DURING_METASTASIS_DN	0.0482155	-0.250086	0.149529	0.0628691	0.0430687	0.867756	0.0556914	-0.169181	0.0175371	0.0593797	0.0822491	0.999279	0.14367	-0.0734874
COATES_MACROPHAGE_M1_VS_M2_DN	0.0461793	0.0142205	0.882742	0.0510927	-0.0329952	0.84988	0.0404203	-0.168795	0.000677885	0.0513601	-0.0949561	0.999279	0.0559365	-0.0706316
COATES_MACROPHAGE_M1_VS_M2_UP	0.0318514	0.115123	0.203182	0.0364601	0.0687539	0.642784	0.0310542	0.00655095	0.777676	0.0310073	-0.019114	0.999279	0.80183	0.0428285
COLDREN_GEFITINIB_RESISTANCE_DN	0.0267578	-0.184637	0.017024	0.0346475	-0.0426489	0.84116	0.0327845	-0.0476548	0.426868	0.0337104	-0.0247418	0.999279	0.251524	-0.0749207
COLDREN_GEFITINIB_RESISTANCE_UP	0.0520948	0.107541	0.000390719	0.0496185	0.0449609	0.638019	0.0498386	0.0383378	0.0951348	0.0507695	0.0616329	0.999279	0.00639135	0.063118
COLIN_PILOCYTIC_ASTROCYTOMA_VS_GLIOBLASTOMA_DN	0.263761	0.0128266	0.905427	0.263614	0.0148241	0.927102	0.258652	-0.00660749	0.983607	0.259185	-0.0325997	0.999279	0.999951	-0.00288911
COLIN_PILOCYTIC_ASTROCYTOMA_VS_GLIOBLASTOMA_UP	0.0862851	0.0530445	0.284133	0.086238	0.0617565	0.591466	0.085617	0.0306098	0.59291	0.0802435	0.0420591	0.999279	0.797943	0.0468675
COLINA_TARGETS_OF_4EBP1_AND_4EBP2	0.0755788	-0.0427523	0.42207	0.0805005	0.034011	0.750827	0.0783643	0.0291212	0.0697053	0.081543	0.0111567	0.999279	0.470754	0.00788418
COLLER_MYC_TARGETS_UP	0.247718	-0.00788497	0.856553	0.214385	-0.00581967	0.996932	0.243819	0.0128759	0.507274	0.218241	-0.0392729	0.999279	0.989414	-0.0100254
CONCANNON_APOPTOSIS_BY_EPOXOMICIN_DN	0.0920736	0.0231145	0.649762	0.0877546	0.0142122	0.84988	0.0862326	0.0692082	0.218299	0.0907171	-0.00105197	0.999279	0.835529	0.0263707
CONCANNON_APOPTOSIS_BY_EPOXOMICIN_UP	0.102942	-0.0351573	0.486567	0.105967	0.0428292	0.774351	0.104368	-0.0116383	0.935319	0.105035	-0.0226013	0.999279	0.978215	-0.00664192
CONRAD_STEM_CELL	0.05683	-0.0530582	0.830734	0.0546142	0.0121018	0.911263	0.0558742	-0.0780616	0.401368	0.0591654	-0.00185283	0.999279	0.966924	-0.0302177
CORRE_MULTIPLE_MYELOMA_DN	0.0412348	-0.0440658	0.693339	0.0383404	-0.0571095	0.726854	0.0409924	-0.0841984	0.108839	0.038125	-0.0970203	0.999279	0.668758	-0.0705985
CORRE_MULTIPLE_MYELOMA_UP	0.0218272	-0.219781	0.164165	0.0287	0.0298197	1	0.0249816	0.0298928	0.909414	0.0293044	0.0634349	0.999279	0.874265	-0.0241585
COULOUARN_TEMPORAL_TGFB1_SIGNATURE_DN	0.06763	-0.0476883	0.321314	0.073844	0.0529999	0.870649	0.0686025	-0.0831384	0.00480081	0.0658762	-0.0386977	0.999279	0.104271	-0.0291311
COULOUARN_TEMPORAL_TGFB1_SIGNATURE_UP	0.103311	0.0135859	0.826	0.110687	0.0977073	0.700352	0.101089	-0.0381546	0.49628	0.107569	-0.000381918	0.999279	0.961855	0.0181892
COWLING_MYCN_TARGETS	0.0492719	0.0943132	0.448335	0.0529617	-0.0121174	0.98357	0.0499955	0.167381	0.00823877	0.0550344	0.0490711	0.999279	0.188639	0.0746621
CREIGHTON_AKT1_SIGNALING_VIA_MTOR_DN	0.290729	0.0300651	0.325775	0.283166	-0.0093339	0.942652	0.282955	-0.0155093	0.775079	0.282774	0.0120405	0.999279	0.942118	0.00431561
CREIGHTON_AKT1_SIGNALING_VIA_MTOR_UP	0.153105	-0.0265528	0.810517	0.160123	0.0594622	0.591466	0.163335	0.0594925	0.000677885	0.153749	0.00509668	0.999279	0.0414595	0.0243746
CREIGHTON_ENDOCRINE_THERAPY_RESISTANCE_1	0.0835274	0.0136949	0.704525	0.0790544	-0.0022338	0.919441	0.0819199	0.00983526	0.485667	0.0808777	0.00228194	0.999279	0.969827	0.00589459
CREIGHTON_ENDOCRINE_THERAPY_RESISTANCE_2	0.0243323	-0.0151175	0.785991	0.0244788	-0.00759648	0.682656	0.0253209	0.0172218	0.538932	0.0242429	0.00687381	0.999279	0.962522	0.000345401
CREIGHTON_ENDOCRINE_THERAPY_RESISTANCE_3	0.0590806	-0.030307	0.733029	0.0644936	0.0232306	0.970905	0.0613608	-0.00964288	0.489778	0.0626404	0.0118958	0.999279	0.977478	-0.00120586
CREIGHTON_ENDOCRINE_THERAPY_RESISTANCE_4	0.0619536	0.0071332	0.879274	0.0595894	-0.00231638	0.781501	0.0604765	-0.0137738	0.505716	0.060668	-0.0104764	0.999279	0.977268	-0.00485834
CREIGHTON_ENDOCRINE_THERAPY_RESISTANCE_5	0.0657589	-0.00245531	0.595623	0.0676909	0.0467587	0.610017	0.0675576	-0.0299523	0.214529	0.0651406	-0.000348489	0.999279	0.746308	0.00350065
CROMER_METASTASIS_DN	0.139039	-0.0160834	0.400902	0.139072	0.00922677	0.870649	0.139892	0.0115491	0.872795	0.137194	0.00612824	0.999279	0.967149	0.00270518
CROMER_METASTASIS_UP	0.0783836	0.00918917	0.327738	0.0783945	0.0244973	0.808918	0.0785243	0.0022877	0.622847	0.0786974	-0.0161726	0.999279	0.891006	0.0049504
CROMER_TUMORIGENESIS_DN	0.0530128	-0.178376	0.0204794	0.0697084	0.084132	0.837199	0.0606854	-0.0241178	0.693854	0.0675192	0.0340618	0.999279	0.353856	-0.021075
CROMER_TUMORIGENESIS_UP	0.0960401	-0.0222517	0.61975	0.0980572	0.00816541	0.873667	0.101072	0.0652741	0.134014	0.105565	0.0868534	0.999279	0.730765	0.0345103
CROONQUIST_IL6_DEPRIVATION_DN	0.0859831	0.0817909	0.8694	0.0577605	-0.0224782	0.976173	0.0887419	0.456463	0.0348789	0.0639885	-0.00510328	0.999279	0.532181	0.127668
CROONQUIST_NRAS_SIGNALING_DN	0.101232	0.150274	0.980131	0.066138	0.0331615	0.916726	0.0962172	0.388068	0.083588	0.0687867	-0.0275672	0.999279	0.738264	0.135984
CROONQUIST_NRAS_SIGNALING_UP	0.0465763	-0.0975605	0.184572	0.0564173	-0.0635747	0.779487	0.0507256	-0.0643452	0.253281	0.05494	-0.0460354	0.999279	0.57751	-0.067879
CROONQUIST_NRAS_VS_STROMAL_STIMULATION_DN	0.166962	0.0263846	0.688191	0.169187	0.118739	0.465335	0.16697	0.063571	0.0445159	0.157703	0.000578381	0.999279	0.385972	0.0523182
CROONQUIST_NRAS_VS_STROMAL_STIMULATION_UP	0.030485	-0.310443	0.018979	0.0345554	-0.0358799	0.873667	0.037166	-0.251479	0.0047409	0.0275361	-0.29823	0.999279	0.0153846	-0.224008
CROONQUIST_STROMAL_STIMULATION_UP	0.209365	0.0189072	0.770872	0.211742	0.0533299	0.504876	0.207611	0.0116552	0.733239	0.201096	-0.00108907	0.999279	0.961293	0.0207008
CUI_GLUCOSE_DEPRIVATION	0.134672	0.0246254	0.568456	0.137374	0.0147841	0.760479	0.129473	-0.0198854	0.974621	0.130668	-0.0572735	0.999279	0.988197	-0.00943734
CUI_TCF21_TARGETS_2_DN	0.0606893	-0.0639056	0.347914	0.0636185	0.0254435	0.940842	0.06354	-0.0471564	0.113632	0.065067	0.0210177	0.999279	0.582042	-0.0161502
CUI_TCF21_TARGETS_2_UP	0.101545	-0.00206004	0.962306	0.0943339	0.00770079	0.928257	0.104551	0.0522697	0.194284	0.0960617	0.018369	0.999279	0.898875	0.0190699
CUI_TCF21_TARGETS_DN	0.045577	-0.0460186	0.770903	0.0464025	0.00880728	0.969288	0.0461635	-0.0731347	0.292577	0.0552985	0.0139529	0.999279	0.931677	-0.0240983
CUI_TCF21_TARGETS_UP	0.0265142	0.00414313	0.555038	0.0223975	0.00280135	0.975248	0.0243092	0.0883898	0.392848	0.0208116	-0.0932976	0.999279	0.928079	0.000509161
DACOSTA_ERCC3_ALLELE_XPCS_VS_TTD_DN	0.0553378	-0.0379536	0.835166	0.0508914	-0.0412227	0.937994	0.0547899	-0.0151791	0.504843	0.0507544	-0.0357919	0.999279	0.985093	-0.0325368
DACOSTA_ERCC3_ALLELE_XPCS_VS_TTD_UP	0.0523578	0.0430571	0.9866	0.0524272	0.00918917	0.980013	0.051484	0.000388709	0.979763	0.0496949	0.050396	0.999279	1	0.0257578
DACOSTA_UV_RESPONSE_VIA_ERCC3_COMMON_DN	0.0656601	0.0230881	0.958126	0.0584945	0.100407	0.744563	0.0673902	-0.0497398	0.346821	0.0575323	-0.0239281	0.999279	0.946567	0.0124568
DACOSTA_UV_RESPONSE_VIA_ERCC3_COMMON_UP	0.0911248	-0.00970582	0.860131	0.089565	-0.0160115	1	0.0905536	0.00921685	0.909414	0.0925472	-0.0164297	0.999279	0.999874	-0.00823256
DACOSTA_UV_RESPONSE_VIA_ERCC3_DN	0.0831274	0.0266618	0.866293	0.0740034	0.094899	0.782913	0.0844925	-0.0218806	0.370487	0.0737771	-0.0281911	0.999279	0.948292	0.0178723
DACOSTA_UV_RESPONSE_VIA_ERCC3_TTD_DN	0.0690165	0.0653933	0.273419	0.0647157	0.137311	0.768156	0.068115	-0.0324337	0.428386	0.0573132	-0.0736639	0.999279	0.776848	0.0241517
DACOSTA_UV_RESPONSE_VIA_ERCC3_TTD_UP	0.0994162	0.00499741	0.7387	0.0997211	0.0449866	0.504341	0.0947266	-0.0170875	0.872766	0.0987287	0.0138094	0.999279	0.972436	0.0116765
DACOSTA_UV_RESPONSE_VIA_ERCC3_UP	0.125101	0.0116888	0.586346	0.126476	0.00251069	0.99907	0.121667	0.0337734	0.176605	0.128578	0.0336104	0.999279	0.805551	0.0203958
DACOSTA_UV_RESPONSE_VIA_ERCC3_XPCS_DN	0.0516833	0.0126065	0.743397	0.045707	0.0564843	0.886457	0.0533291	-0.0171402	0.683155	0.0456589	-0.0606417	0.999279	0.990966	-0.00217278
DACOSTA_UV_RESPONSE_VIA_ERCC3_XPCS_UP	0.0986923	0.0467773	0.505638	0.0859321	-0.0384342	0.919441	0.0937961	0.0361338	0.990741	0.0944439	0.00115112	0.999279	0.991812	0.011407
DAIRKEE_CANCER_PRONE_RESPONSE_BPA	0.129221	0.0263001	0.524408	0.107349	-0.0200419	0.96895	0.123556	0.0526861	0.212683	0.120025	0.0198847	0.999279	0.814275	0.0197072
DAIRKEE_CANCER_PRONE_RESPONSE_BPA_E2	0.234807	-0.00146886	0.785266	0.22268	0.0158807	0.825292	0.236429	0.031389	0.139349	0.220695	-0.0272431	0.999279	0.777625	0.00463943
DAIRKEE_CANCER_PRONE_RESPONSE_E2	0.0572454	-0.307941	0.00036481	0.0713466	-0.00914293	0.891021	0.0723338	0.0325606	0.967267	0.0696523	-0.018396	0.999279	0.0405424	-0.0757299
DANG_BOUND_BY_MYC	0.211585	-0.00182076	0.918304	0.208461	0.0030053	0.970905	0.211203	0.00647292	0.426868	0.209568	-0.00751692	0.999279	0.982983	3.51335e-05
DANG_MYC_TARGETS_DN	0.167141	-0.0487364	0.623864	0.184532	0.09929	0.531434	0.17513	-0.0115895	0.921319	0.173139	-0.000385851	0.999279	0.967376	0.00964457
DANG_MYC_TARGETS_UP	0.351389	0.0121419	0.76041	0.329752	0.0111864	0.89493	0.349387	0.0252094	0.212309	0.33524	0.00185873	0.999279	0.868599	0.0125991
DANG_REGULATED_BY_MYC_DN	0.15163	-0.0171	0.748982	0.158385	0.0590526	0.544266	0.151088	0.00122477	0.850176	0.157843	0.0291893	0.999279	0.977083	0.0180917
DANG_REGULATED_BY_MYC_UP	0.163253	-0.0184772	0.980131	0.148523	-0.00576848	0.961896	0.165087	-0.00122859	0.667892	0.153576	-0.021287	0.999279	0.998671	-0.0116903
DARWICHE_PAPILLOMA_PROGRESSION_RISK	0.0304389	0.0444875	0.76041	0.029147	0.0357929	0.944572	0.0288214	-0.00917165	0.543955	0.0309799	-0.00122231	0.999279	0.984444	0.0174716
DARWICHE_PAPILLOMA_RISK_HIGH_DN	0.0566736	0.0281984	0.394399	0.0577482	-0.0190736	0.969363	0.0534676	-0.0243882	0.496751	0.0585794	0.0183842	0.999279	0.912427	0.000780198
DARWICHE_PAPILLOMA_RISK_HIGH_UP	0.18342	0.00975897	0.661163	0.178194	0.00227101	0.99907	0.182613	-0.00829069	0.373066	0.180164	-0.00884049	0.999279	0.946116	-0.0012753
DARWICHE_PAPILLOMA_RISK_LOW_DN	0.0544409	0.0569154	0.298428	0.056452	0.0269167	0.932859	0.0494702	-0.0341725	0.481045	0.0555816	0.00462413	0.999279	0.855089	0.0135709
DARWICHE_PAPILLOMA_RISK_LOW_UP	0.177951	0.00457721	0.714866	0.173928	-0.00521878	0.951282	0.178499	-0.00871273	0.346119	0.175066	-0.00930272	0.999279	0.940797	-0.00466425
DARWICHE_SKIN_TUMOR_PROMOTER_DN	0.0762229	0.0085893	0.837682	0.0740668	-0.016047	1	0.075541	-0.0239385	0.120372	0.0748847	-0.0114541	0.999279	0.800361	-0.0107126
DARWICHE_SKIN_TUMOR_PROMOTER_UP	0.165205	0.0177794	0.260811	0.163458	-0.000519067	0.993775	0.16034	-0.00991583	0.711237	0.163684	-0.0128775	0.999279	0.908052	-0.00138325
DARWICHE_SQUAMOUS_CELL_CARCINOMA_DN	0.0490792	0.0382628	0.333878	0.0504729	-0.00622523	0.89191	0.0464487	-0.0390817	0.258298	0.0500341	-0.00111402	0.999279	0.743437	-0.00203953
DARWICHE_SQUAMOUS_CELL_CARCINOMA_UP	0.190711	0.0126275	0.600909	0.186301	0.00045823	0.992624	0.188587	-0.00289787	0.498479	0.187562	-0.010162	0.999279	0.965037	6.47787e-06
DASU_IL6_SIGNALING_SCAR_UP	0.0980201	-0.0525405	0.468818	0.0943615	0.0860695	0.700352	0.105731	-0.0182105	0.883845	0.0834665	-0.0833958	0.999279	0.962849	-0.0170193
DASU_IL6_SIGNALING_UP	0.144276	-0.0530952	0.622716	0.143798	0.0667125	0.653332	0.149366	0.0269554	0.110148	0.147652	-0.00428865	0.999279	0.623502	0.00907102
DAUER_STAT3_TARGETS_DN	0.0687578	-0.0759858	0.555888	0.0746992	0.0507018	0.89548	0.0699653	0.0398742	0.395303	0.0799544	0.0126826	0.999279	0.917505	0.0068182
DAUER_STAT3_TARGETS_UP	0.111075	0.0550785	0.644569	0.109306	0.0422651	0.87349	0.104888	0.0284938	0.5598	0.108252	0.0116683	0.999279	0.969976	0.0343764
DAVICIONI_MOLECULAR_ARMS_VS_ERMS_DN	0.0668563	0.0265243	0.99239	0.0695664	0.0367195	0.617526	0.0663215	-0.025005	0.794313	0.0659755	0.0322986	0.999279	0.99364	0.0176343
DAVICIONI_MOLECULAR_ARMS_VS_ERMS_UP	0.0518728	0.0200609	0.748098	0.0531017	0.015752	0.862221	0.0515332	-0.016018	0.215385	0.0518612	-0.0083882	0.999279	0.861693	0.00285168
DAVICIONI_PAX_FOXO1_SIGNATURE_IN_ARMS_UP	0.0787195	0.00302082	0.733029	0.0854567	0.0487658	0.651522	0.0815324	0.0475121	0.408669	0.0845305	0.084261	0.999279	0.916348	0.0458899
DAVICIONI_RHABDOMYOSARCOMA_PAX_FOXO1_FUSION_UP	0.0714536	-0.0135843	0.66086	0.0804291	0.053524	0.832753	0.0757974	0.0277855	0.212683	0.0747021	0.00666373	0.999279	0.829882	0.0185972
DAVICIONI_TARGETS_OF_PAX_FOXO1_FUSIONS_DN	0.0474143	0.0442829	0.985318	0.0443313	-0.0132654	0.99907	0.0440973	-0.0756838	0.0737143	0.0431847	-0.0634674	0.999279	0.73077	-0.0270334
DAVICIONI_TARGETS_OF_PAX_FOXO1_FUSIONS_UP	0.0944315	-0.0459611	0.241294	0.100973	0.0384317	0.532891	0.0999518	0.00577467	0.921749	0.1007	0.0502638	0.999279	0.832289	0.0121273
DAVIES_MULTIPLE_MYELOMA_VS_MGUS_DN	0.110534	-0.0782612	0.0940928	0.110067	0.048188	0.872649	0.110639	-0.0183487	0.828073	0.107792	0.0131661	0.999279	0.7165	-0.00881394
DAWSON_METHYLATED_IN_LYMPHOMA_TCL1	0.0311598	0.159039	0.0747121	0.0307949	-0.00519356	0.97453	0.027828	0.0232163	0.971961	0.0315802	0.00617391	0.999279	0.725286	0.045809
DAZARD_RESPONSE_TO_UV_NHEK_DN	0.0539328	0.0792871	0.683327	0.0417839	0.0442945	0.858988	0.0526028	-0.00520668	0.553462	0.0454831	-0.00580545	0.999279	0.972367	0.0281423
DAZARD_RESPONSE_TO_UV_NHEK_UP	0.274987	0.00218753	0.813555	0.281584	0.0122657	0.796764	0.269695	0.0205491	0.0773688	0.281664	0.0126284	0.999279	0.648703	0.0119077
DAZARD_RESPONSE_TO_UV_SCC_DN	0.0783762	0.0617899	0.567279	0.075266	0.108017	0.828358	0.0731067	-0.0536768	0.162295	0.074745	-0.0371951	0.999279	0.741587	0.0197337
DAZARD_RESPONSE_TO_UV_SCC_UP	0.205515	-0.019489	0.325775	0.214198	0.0113088	0.741172	0.213053	0.0225937	0.247988	0.217211	0.00485222	0.999279	0.688338	0.00481644
DAZARD_UV_RESPONSE_CLUSTER_G1	0.361681	0.02378	0.021347	0.370818	0.0141543	0.946766	0.346493	0.0189944	0.024845	0.368612	0.00471359	0.999279	0.0554678	0.0154106
DAZARD_UV_RESPONSE_CLUSTER_G6	0.0563719	-0.00470964	0.927906	0.0465026	0.0697931	0.722014	0.0594474	0.0104541	0.910301	0.0508842	0.0245462	0.999279	0.998308	0.0250209
DE_YY1_TARGETS_DN	0.138994	0.0254626	0.847779	0.121769	0.02394	0.642784	0.142322	-0.0131112	0.716915	0.12504	-0.0262184	0.999279	0.98444	0.00251826
DEBIASI_APOPTOSIS_BY_REOVIRUS_INFECTION_DN	0.0585613	0.0790623	0.161779	0.0567255	0.0269514	0.777894	0.0555986	-0.0452264	0.312084	0.0554206	0.0173198	0.999279	0.594095	0.0195268
DEBIASI_APOPTOSIS_BY_REOVIRUS_INFECTION_UP	0.0993998	-0.0083016	0.905427	0.0987301	0.0220517	1	0.0967634	-0.00437487	0.900453	0.0993461	-0.0316973	0.999279	0.999938	-0.0055805
DELACROIX_RAR_BOUND_ES	0.0806697	0.00459921	0.727083	0.0818104	0.00138322	1	0.0812381	0.00907841	0.778657	0.0805884	-0.0131505	0.999279	0.997206	0.000477585
DELACROIX_RAR_TARGETS_DN	0.0991907	-0.0312607	0.702687	0.0899959	0.0409593	0.808918	0.109078	0.012759	0.598824	0.086784	-0.0514201	0.999279	0.975823	-0.00724064
DELACROIX_RAR_TARGETS_UP	0.16038	-0.022092	0.747839	0.180046	0.0358435	0.825292	0.160231	-0.000448576	0.711237	0.167929	-0.0182205	0.999279	0.989967	-0.00122937
DELACROIX_RARG_BOUND_MEF	0.123088	-0.00455697	0.783018	0.128491	0.0313413	0.665235	0.124142	0.00701085	0.82541	0.122463	-0.0125775	0.999279	0.989094	0.00530444
DELASERNA_MYOD_TARGETS_DN	0.119756	0.0146175	0.981275	0.126007	0.0819496	0.531434	0.121439	0.0252298	0.294409	0.125293	0.052437	0.999279	0.879016	0.0435585
DELASERNA_MYOD_TARGETS_UP	0.0558036	-0.123178	0.0262738	0.0590956	0.0160313	0.97453	0.058362	-0.0578673	0.253535	0.0578432	-0.0730855	0.999279	0.259738	-0.0595248
DELPUECH_FOXO3_TARGETS_DN	0.0964485	-0.0899035	0.741092	0.0934653	0.0284588	0.825292	0.0993187	0.0802446	0.145604	0.0932207	-0.0242621	0.999279	0.774694	-0.00136556
DELPUECH_FOXO3_TARGETS_UP	0.102257	-0.0620403	0.0940928	0.110862	0.0131234	0.891175	0.10213	-0.0403501	0.314744	0.107609	-0.0215668	0.999279	0.507716	-0.0277084
DELYS_THYROID_CANCER_DN	0.0475639	0.0137553	0.8235	0.048286	-0.0221915	0.978952	0.0470185	-0.00794114	0.945895	0.0469865	0.0363112	0.999279	0.999817	0.00498349
DELYS_THYROID_CANCER_UP	0.0944093	-0.061897	0.017024	0.101745	0.00679753	0.916726	0.0996315	-0.0167134	0.527953	0.101204	0.0188073	0.999279	0.294299	-0.0132514
DEMAGALHAES_AGING_UP	0.225703	-0.0705848	0.00752295	0.232268	-0.00513226	0.916726	0.236435	0.00803391	0.42198	0.241066	0.00491943	0.999279	0.166037	-0.0156909
DEN_INTERACT_WITH_LCA5	0.451633	0.0171514	0.512753	0.434802	0.00334732	0.904067	0.446043	0.00566374	0.851883	0.449948	-0.00111019	0.999279	0.985016	0.00626305
DER_IFN_ALPHA_RESPONSE_UP	0.173079	-0.0562801	0.365624	0.174643	-0.0193804	0.77196	0.178301	0.00580701	0.986837	0.18207	-0.0152561	0.999279	0.958977	-0.0212774
DER_IFN_BETA_RESPONSE_UP	0.191646	-0.00244293	0.824894	0.184728	-0.0040528	0.998475	0.190022	-0.00870296	0.983723	0.186125	-0.0509507	0.999279	0.99993	-0.0165373
DER_IFN_GAMMA_RESPONSE_UP	0.193509	-0.0101433	0.904952	0.19111	-0.0259821	0.864262	0.193708	0.00748957	0.842502	0.198007	-0.0208708	0.999279	0.999089	-0.0123767
DESERT_PERIPORTAL_HEPATOCELLULAR_CARCINOMA_SUBCLASS_UP	0.0140145	-0.127185	0.0962073	0.0201363	0.0116419	0.970905	0.0167938	0.0291682	0.74535	0.0186487	0.115236	0.999279	0.721705	0.00721533
DESERT_PERIVENOUS_HEPATOCELLULAR_CARCINOMA_SUBCLASS_UP	0.0641427	0.0266048	0.625886	0.0631563	-0.0130245	0.969288	0.0630767	-0.00478326	0.915632	0.0646253	0.0127236	0.999279	0.996861	0.00538015
DESERT_STEM_CELL_HEPATOCELLULAR_CARCINOMA_SUBCLASS_UP	0.176187	0.0167063	0.5508	0.164306	0.00552909	0.669536	0.175791	0.0179732	0.169402	0.16895	0.00194643	0.999279	0.697771	0.0105388
DEURIG_T_CELL_PROLYMPHOCYTIC_LEUKEMIA_DN	0.0589522	-0.0323479	0.394399	0.0561898	-0.027407	0.927102	0.0607066	-0.0404471	0.0620552	0.0589947	-0.00251966	0.999279	0.476243	-0.0256804
DEURIG_T_CELL_PROLYMPHOCYTIC_LEUKEMIA_UP	0.0818721	-0.0303854	0.394399	0.0839307	0.0039938	0.959792	0.083163	0.00615781	0.420811	0.0839368	0.00265402	0.999279	0.885155	-0.00439495
DIAZ_CHRONIC_MEYLOGENOUS_LEUKEMIA_DN	0.13602	-0.0490228	0.0789357	0.13892	-0.0151734	0.886457	0.138072	0.00239588	0.799036	0.141114	-0.00515666	0.999279	0.673041	-0.0167392
DIAZ_CHRONIC_MEYLOGENOUS_LEUKEMIA_UP	0.229202	0.00537098	0.641066	0.219258	0.00298067	0.881544	0.227688	0.00197832	0.575405	0.223124	-0.0110945	0.999279	0.972441	-0.000191133
DING_LUNG_CANCER_EXPRESSION_BY_COPY_NUMBER	0.071748	-0.0028439	0.629196	0.069639	0.0177057	0.687342	0.0744597	-0.0116983	0.932344	0.0691852	-0.0130364	0.999279	0.986091	-0.0024682
DING_LUNG_CANCER_MUTATED_SIGNIFICANTLY	0.0642221	0.00886942	0.821273	0.0683629	0.0785195	0.718735	0.0670718	0.00440932	0.833144	0.0647101	-0.0298763	0.999279	0.993945	0.0154805
DIRMEIER_LMP1_RESPONSE_EARLY	0.249249	-0.00726141	0.987134	0.244434	0.00408516	0.881989	0.251255	0.019849	0.541132	0.251323	0.00449489	0.999279	0.992596	0.0052919
DIRMEIER_LMP1_RESPONSE_LATE_DN	0.409831	0.002487	0.843161	0.408102	-0.00122909	0.975248	0.403396	0.0269215	0.0445159	0.414772	0.0182627	0.999279	0.578508	0.0116105
DIRMEIER_LMP1_RESPONSE_LATE_UP	0.109773	0.0220199	0.732947	0.108747	0.0111995	0.825292	0.104313	-0.026626	0.253281	0.109951	-0.0218186	0.999279	0.878663	-0.0038063
DITTMER_PTHLH_TARGETS_DN	0.129962	-0.0384607	0.333878	0.131597	0.00455069	0.97453	0.138895	-0.0143375	0.538782	0.133064	-0.0176776	0.999279	0.900436	-0.0164813
DITTMER_PTHLH_TARGETS_UP	0.202838	-0.000846183	0.826229	0.201575	0.023134	0.531434	0.204623	0.00714959	0.597922	0.199786	0.010133	0.999279	0.95301	0.00989259
DOANE_BREAST_CANCER_CLASSES_DN	0.136494	-0.0183615	0.903547	0.139192	0.0295823	0.956002	0.134537	0.0158546	0.746835	0.135394	-0.0651277	0.999279	0.998907	-0.00951305
DOANE_BREAST_CANCER_CLASSES_UP	0.015602	-0.357935	0.000260742	0.0234819	-0.0769807	0.713482	0.0200772	-0.103007	0.423593	0.0242424	-0.0772694	0.999279	0.0154117	-0.153798
DOANE_BREAST_CANCER_ESR1_DN	0.0350588	-0.175387	0.0344481	0.0313453	-0.246142	0.364035	0.0370946	-0.139094	0.0570967	0.0334527	-0.177455	0.999279	0.0699658	-0.18452
DOANE_BREAST_CANCER_ESR1_UP	0.0375498	-0.0890545	0.149974	0.039175	-0.0434393	0.863735	0.0385803	-0.0718971	0.0874052	0.0399081	-0.0386446	0.999279	0.345392	-0.0607589
DOANE_RESPONSE_TO_ANDROGEN_DN	0.0780022	0.00192893	0.977168	0.0761926	0.00773501	0.873919	0.0775506	-0.0387231	0.0846854	0.0758862	0.00891373	0.999279	0.730029	-0.00503635
DOANE_RESPONSE_TO_ANDROGEN_UP	0.0427111	-0.115703	0.0136678	0.0426338	-0.032981	0.870649	0.0463453	-0.0679516	0.039884	0.0432621	0	0.999279	0.0534356	-0.054159
DODD_NASOPHARYNGEAL_CARCINOMA_DN	0.155373	0.00906433	0.721441	0.140043	0.00901087	0.796764	0.152775	0.0270889	0.291597	0.145503	-0.00486873	0.999279	0.893402	0.0100739
DODD_NASOPHARYNGEAL_CARCINOMA_UP	0.0537841	-0.0305993	0.34563	0.0600504	-0.0154611	0.984391	0.0555727	0.00309876	0.995871	0.0594124	0.0256624	0.999279	0.975497	-0.00432481
DORN_ADENOVIRUS_INFECTION_12HR_DN	0.226075	0.0156691	0.775036	0.206625	0.00311934	0.919441	0.219815	0.0194126	0.544583	0.222629	-0.0404768	0.999279	0.984075	-0.000568954
DORN_ADENOVIRUS_INFECTION_12HR_UP	0.0956817	-0.0153791	0.849745	0.0934142	0.0134455	0.928323	0.104622	0.00538729	0.687894	0.0922588	-0.0553843	0.999279	0.996398	-0.0129826
DORN_ADENOVIRUS_INFECTION_24HR_DN	0.210109	0.044689	0.690449	0.190845	0.000142285	0.878241	0.204829	0.00710967	0.51186	0.205554	-0.0143926	0.999279	0.968719	0.00938709
DORN_ADENOVIRUS_INFECTION_32HR_DN	0.227483	0.0233078	0.786484	0.213807	0.054776	0.872649	0.227252	-0.00133719	0.991125	0.2225	-0.020823	0.999279	0.999319	0.0139809
DORN_ADENOVIRUS_INFECTION_48HR_DN	0.220716	0.0411713	0.786433	0.202476	0.0303488	0.885162	0.217535	-0.00832112	0.932475	0.211632	-0.0328879	0.999279	0.998963	0.00757778
DORSAM_HOXA9_TARGETS_DN	0.23397	0.00744397	0.768047	0.21959	0.0145257	0.931127	0.22957	-0.000436497	0.962374	0.222543	-0.0483441	0.999279	0.999392	-0.00670272
DORSAM_HOXA9_TARGETS_UP	0.138176	-0.0264083	0.484523	0.132603	0.0149676	0.666586	0.141575	0.00910501	0.983412	0.140196	0.0370218	0.999279	0.970596	0.00867152
DORSEY_GAB2_TARGETS	0.0848819	0.0342594	0.858384	0.0817077	0.0816882	0.488264	0.0820932	0.0627759	0.204906	0.0793045	0.0652785	0.999279	0.767039	0.0610005
DOUGLAS_BMI1_TARGETS_DN	0.0421229	-0.0268527	0.78785	0.0475949	0.01778	0.970905	0.0414864	-0.016118	0.932475	0.048658	0.0221721	0.999279	0.999582	-0.000754661
DOUGLAS_BMI1_TARGETS_UP	0.0570416	-0.0221345	0.302475	0.0600568	0.0464643	0.544266	0.0583307	-0.00979639	0.510316	0.0574915	-0.0170022	0.999279	0.762371	-0.000617212
DUAN_PRDM5_TARGETS	0.0250923	0.0719936	0.609395	0.0278308	-0.0149563	1	0.0218965	-0.0779638	0.412844	0.0275742	0.0348508	0.999279	0.948428	0.00348107
DUNNE_TARGETS_OF_AML1_MTG8_FUSION_UP	0.062841	0.0125132	0.847485	0.0672346	-0.0209044	0.978952	0.0543587	-0.0623621	0.0733184	0.0673685	0.00670206	0.999279	0.691844	-0.0160128
DURAND_STROMA_NS_UP	0.0190906	-0.137787	0.124649	0.0228931	-0.0303337	0.731951	0.0199614	-0.074032	0.334598	0.0234295	0.043851	0.999279	0.538826	-0.0495754
DURAND_STROMA_S_UP	0.0163401	-0.139231	0.0898449	0.0213891	-0.0617551	0.642784	0.0175238	-0.154181	0.0266127	0.0212382	0.06889	0.999279	0.113323	-0.0715692
DURCHDEWALD_SKIN_CARCINOGENESIS_DN	0.0847369	-0.0420808	0.747968	0.0841706	0.0667753	0.738803	0.0901483	-0.0219167	0.642767	0.0805773	-0.048217	0.999279	0.978737	-0.0113598
DURCHDEWALD_SKIN_CARCINOGENESIS_UP	0.0421362	-0.0271741	0.925989	0.0442233	-0.0513492	0.637405	0.0424883	0.0368547	0.813198	0.0448765	-0.00883185	0.999279	0.993203	-0.0126251
DUTERTRE_ESTRADIOL_RESPONSE_24HR_DN	0.08629	-0.0122861	0.719788	0.0896174	0.0739773	0.669991	0.0867273	-0.0257086	0.337273	0.0868493	-0.00256657	0.999279	0.888565	0.008354
DUTERTRE_ESTRADIOL_RESPONSE_24HR_UP	0.0339523	0.0330844	0.48642	0.0300748	-0.0195189	0.944572	0.0370521	0.271942	0.19813	0.0331669	0.0702361	0.999279	0.779295	0.0889358
DUTERTRE_ESTRADIOL_RESPONSE_6HR_DN	0.026204	-0.0820289	0.482528	0.0349275	0.155372	0.520756	0.0305282	-0.0148854	0.577399	0.0329403	0.102249	0.999279	0.869331	0.0401767
DUTERTRE_ESTRADIOL_RESPONSE_6HR_UP	0.0585941	-0.0857647	0.148156	0.0572859	0.00202756	0.944572	0.0629595	0.0136505	0.977804	0.0604725	0.0160278	0.999279	0.858981	-0.0135147
DUTTA_APOPTOSIS_VIA_NFKB	0.114178	0.107473	0.0949429	0.103949	0.0548397	0.825292	0.108541	0.042523	0.330087	0.109209	0.0623684	0.999279	0.503455	0.0668011
EBAUER_MYOGENIC_TARGETS_OF_PAX3_FOXO1_FUSION	0.0518793	-0.0992739	0.0500226	0.0553756	0.0174135	0.744247	0.0579002	0.053326	0.253281	0.0558656	0.0222606	0.999279	0.315285	-0.00156844
EBAUER_TARGETS_OF_PAX3_FOXO1_FUSION_DN	0.0293956	0.0564216	0.896675	0.0305047	-0.0155223	0.98357	0.0315313	0.0305164	0.693021	0.0254725	-0.110397	0.999279	0.998335	-0.00974523
EBAUER_TARGETS_OF_PAX3_FOXO1_FUSION_UP	0.0645985	-0.0118638	0.770872	0.0647821	0.0532977	0.798423	0.0644452	0.0108213	0.692441	0.0658554	0.0294891	0.999279	0.988711	0.0204361
EGUCHI_CELL_CYCLE_RB1_TARGETS	0.0614668	0.00147893	0.856553	0.0358031	0.0970907	0.998475	0.0694335	0.777888	0.112287	0.0369052	-0.0460345	0.999279	0.790388	0.207606
EHLERS_ANEUPLOIDY_UP	0.085426	-0.0264508	0.750233	0.0881797	0.0482928	0.951323	0.0889552	0.0126312	0.937421	0.0924645	0.0815227	0.999279	0.999205	0.0289989
EINAV_INTERFERON_SIGNATURE_IN_CANCER	0.0633555	-0.165429	0.511515	0.0854078	0.167055	0.84988	0.0653699	0.0127163	0.48468	0.0841538	0.0380044	0.999279	0.926865	0.0130867
ELLWOOD_MYC_TARGETS_DN	0.0975252	-0.0365391	0.357572	0.107996	0.0357671	0.846535	0.102475	0.00845196	0.970087	0.0936836	-0.0661508	0.999279	0.963921	-0.0146177
ELVIDGE_HIF1A_AND_HIF2A_TARGETS_DN	0.0903939	-0.0366065	0.918304	0.0999514	0.0249432	0.987886	0.0907044	-0.0856978	0.252218	0.0992743	-0.0315623	0.999279	0.937383	-0.0322309
ELVIDGE_HIF1A_AND_HIF2A_TARGETS_UP	0.0296971	0.160516	0.443585	0.0253194	-0.0744078	0.782913	0.0270705	-0.0542009	0.498479	0.0227196	-0.135801	0.999279	0.898488	-0.0259734
ELVIDGE_HIF1A_TARGETS_DN	0.0780995	-0.0292055	0.808043	0.0874336	0.00334151	1	0.0802107	-0.0600514	0.346821	0.0917236	0.0216368	0.999279	0.95957	-0.0160696
ELVIDGE_HIF1A_TARGETS_UP	0.0364254	-0.00946755	0.946085	0.0353267	-0.0549707	0.802001	0.0362079	-0.0279503	0.312368	0.0336423	-0.0645462	0.999279	0.941618	-0.0392337
ELVIDGE_HYPOXIA_BY_DMOG_DN	0.052982	0.170213	0.14064	0.0459488	-0.0196134	0.960894	0.0484404	0.0172129	0.532114	0.0462512	-0.0176238	0.999279	0.72879	0.0375472
ELVIDGE_HYPOXIA_BY_DMOG_UP	0.101632	-0.0736334	0.588442	0.111684	0.0238789	0.976252	0.104011	-0.0743772	0.220688	0.108658	-0.0420741	0.999279	0.845014	-0.0415515
ELVIDGE_HYPOXIA_DN	0.0755574	0.0357413	0.406909	0.0712661	0.0581175	0.531434	0.0730914	0.00864589	0.759152	0.0682509	-0.00854272	0.999279	0.890065	0.0234905
ELVIDGE_HYPOXIA_UP	0.10402	-0.0612429	0.775036	0.115183	0.0549101	0.89033	0.106484	-0.0522397	0.326709	0.1136	-0.00777487	0.999279	0.935555	-0.0165868
ENGELMANN_CANCER_PROGENITORS_DN	0.0552011	-0.109629	0.0420082	0.0526758	-0.0011491	0.999547	0.0552781	-0.0294567	0.681742	0.0548933	-0.00971145	0.999279	0.52499	-0.0374865
ENGELMANN_CANCER_PROGENITORS_UP	0.0716337	0.0200766	0.866293	0.0699135	0.0448965	0.904067	0.0679336	-0.0235868	0.999609	0.0773544	0.0897536	0.999279	0.999876	0.032785
ENK_UV_RESPONSE_EPIDERMIS_DN	0.0942955	-0.041966	0.396752	0.0979021	0.0630622	0.629747	0.0968883	-0.0102064	0.701494	0.0954036	-0.0330932	0.999279	0.900406	-0.00555085
ENK_UV_RESPONSE_EPIDERMIS_UP	0.0835687	-0.0506667	0.16217	0.0862372	0.018392	0.858649	0.085361	-0.0018499	0.854218	0.0861177	0.0052519	0.999279	0.832976	-0.00721819
ENK_UV_RESPONSE_KERATINOCYTE_DN	0.115717	0.0204898	0.366725	0.106326	0.0227921	0.718735	0.116158	0.00415943	0.889245	0.10897	-0.0166575	0.999279	0.940295	0.00769597
ENK_UV_RESPONSE_KERATINOCYTE_UP	0.259842	0.00507031	0.971022	0.262467	0.0156395	0.849966	0.256183	0.0149825	0.0959673	0.261318	0.0152072	0.999279	0.74976	0.0127249
EPPERT_CE_HSC_LSC	0.0365176	-0.0809727	0.443563	0.0347394	0.0511428	0.873919	0.0370309	-0.0673252	0.527953	0.0365543	0.0123525	0.999279	0.922947	-0.0212006
EPPERT_HSC_R	0.0774874	-0.0457042	0.455703	0.0784559	0.0427654	0.916047	0.0828174	0.00275945	0.725286	0.0730215	-0.0552697	0.999279	0.966619	-0.0138623
EPPERT_LSC_R	0.0607186	-0.0699517	0.602901	0.0599644	0.0598439	0.659833	0.0643733	-0.00129953	0.993389	0.0601868	-0.00208432	0.999279	0.985053	-0.00337292
EPPERT_PROGENITOR	0.0747393	-0.0308333	0.766151	0.0708494	0.053915	0.637787	0.0810496	0.100454	0.0378214	0.0714182	0.00813425	0.999279	0.435088	0.0329175
FAELT_B_CLL_WITH_VH_REARRANGEMENTS_DN	0.157307	0.00775062	0.809655	0.155477	0.0207218	0.724147	0.158712	-0.00606117	0.976337	0.15572	-0.00238985	0.999279	0.997394	0.00500535
FAELT_B_CLL_WITH_VH_REARRANGEMENTS_UP	0.160273	0.00798536	0.571921	0.162912	0.0376168	0.61397	0.157099	0.02139	0.359711	0.161693	0.011588	0.999279	0.844325	0.019645
FAELT_B_CLL_WITH_VH3_21_DN	0.147171	-0.0273412	0.197542	0.155601	-0.00120325	0.947551	0.147941	0.0237755	0.212309	0.153548	-0.0324909	0.999279	0.596712	-0.00931495
FAELT_B_CLL_WITH_VH3_21_UP	0.0797997	-0.0227905	0.482528	0.0724334	-0.0294705	0.927102	0.0776986	-0.0419435	0.498004	0.0704154	-0.0679647	0.999279	0.934071	-0.0405423
FALVELLA_SMOKERS_WITH_LUNG_CANCER	0.136747	0.0189129	0.958625	0.126954	0.101741	0.478039	0.138447	-0.0268164	0.649853	0.122969	-0.00948811	0.999279	0.965176	0.0210873
FARDIN_HYPOXIA_11	0.135589	-0.0419599	0.750862	0.149947	0.0232645	0.979391	0.139658	-0.126939	0.0480371	0.138055	-0.115973	0.999279	0.570669	-0.0654017
FARMER_BREAST_CANCER_APOCRINE_VS_BASAL	0.0686769	-0.0107581	0.770872	0.0669286	0.00789593	0.978952	0.0699711	0.008742	0.639673	0.0681942	-0.00446442	0.999279	0.993383	0.000353857
FARMER_BREAST_CANCER_APOCRINE_VS_LUMINAL	0.0722665	-0.0453411	0.0502242	0.075525	-0.0154328	0.870649	0.0760375	-0.0200037	0.346119	0.0732505	-0.0257776	0.999279	0.396985	-0.0266388
FARMER_BREAST_CANCER_BASAL_VS_LULMINAL	0.0756119	-0.00797146	0.690355	0.0733883	-0.0102518	0.999547	0.0744066	-0.0231328	0.21064	0.073057	-0.0561919	0.999279	0.869645	-0.024387
FARMER_BREAST_CANCER_CLUSTER_1	0.00403285	-0.624099	0.528541	0.00759506	0.00927781	0.944572	0.00571252	0.668269	0.303456	0.010922	0.552112	0.999279	0.876765	0.15139
FARMER_BREAST_CANCER_CLUSTER_2	0.0213186	0.233306	0.952887	0.0124863	0.0826145	0.911199	0.0235603	0.395495	0.0959673	0.0140218	0.0080953	0.999279	0.760624	0.179878
FERNANDEZ_BOUND_BY_MYC	0.184944	0.0171874	0.264047	0.186574	0.018497	0.655269	0.180248	0.00802302	0.230526	0.183618	-0.0143275	0.999279	0.597525	0.00734499
FERRANDO_T_ALL_WITH_MLL_ENL_FUSION_DN	0.209401	0.00237961	0.689635	0.196183	0.00419351	0.975248	0.212006	0.0562712	0.117989	0.202382	0.0053298	0.999279	0.750168	0.0170435
FERRANDO_T_ALL_WITH_MLL_ENL_FUSION_UP	0.182429	0.0333872	0.362134	0.178102	0.0324464	0.610017	0.182526	0.0182498	0.594029	0.181164	0.0181152	0.999279	0.851384	0.0255496
FERREIRA_EWINGS_SARCOMA_UNSTABLE_VS_STABLE_DN	0.064925	0.0454184	0.165133	0.0676214	-0.00364514	0.961666	0.0644525	0.0474516	0.474526	0.0702771	0.0562692	0.999279	0.738989	0.0363735
FERREIRA_EWINGS_SARCOMA_UNSTABLE_VS_STABLE_UP	0.069592	0.0398141	0.972956	0.054946	-0.00293399	0.944572	0.0738547	0.213395	0.0632899	0.0601863	-0.0302814	0.999279	0.681868	0.0549985
FEVR_CTNNB1_TARGETS_DN	0.150934	0.0263883	0.622145	0.130455	0.00528567	0.967983	0.151013	0.0510353	0.339904	0.135849	-0.0339861	0.999279	0.922977	0.0121808
FEVR_CTNNB1_TARGETS_UP	0.0745546	-0.0300293	0.537966	0.0822774	0.0126892	0.916726	0.0739089	-0.0327856	0.639944	0.0799205	0.00345232	0.999279	0.970084	-0.0116683
FIGUEROA_AML_METHYLATION_CLUSTER_1_DN	0.0347041	0.0168048	0.76041	0.0374957	0.0728572	0.816865	0.0337808	-0.0675148	0.222585	0.0311522	-0.126118	0.999279	0.860831	-0.0259926
FIGUEROA_AML_METHYLATION_CLUSTER_1_UP	0.0429639	0.0676712	0.310804	0.0431509	0.0549665	0.541758	0.0440014	0.0900195	0.000206641	0.0405662	0.00954954	0.999279	0.00849533	0.0555517
FIGUEROA_AML_METHYLATION_CLUSTER_2_UP	0.0185414	-0.00189289	0.765913	0.0164884	0	0.962354	0.0237589	0.146102	0.125219	0.0194015	0.151936	0.999279	0.782171	0.0740364
FIGUEROA_AML_METHYLATION_CLUSTER_3_DN	0.0642122	-0.0109874	0.727083	0.0652299	0.0440962	0.748755	0.0636734	-0.0324576	0.240412	0.0628831	-0.0464903	0.999279	0.850904	-0.0114598
FIGUEROA_AML_METHYLATION_CLUSTER_3_UP	0.0499475	0.030119	0.551506	0.0444357	-0.0807121	0.642784	0.0495331	0.000394492	0.960808	0.0464129	-0.0245422	0.999279	0.97587	-0.0186852
FIGUEROA_AML_METHYLATION_CLUSTER_4_UP	0.048449	0.0246216	0.575784	0.0450751	-0.0358823	0.734659	0.048315	-0.00961878	0.363547	0.0463285	-0.00392237	0.999279	0.879292	-0.00620048
FIGUEROA_AML_METHYLATION_CLUSTER_5_DN	0.0244034	0.059513	0.786484	0.028909	0.171977	0.713482	0.02363	-0.00059018	0.866128	0.0242197	0.00866486	0.999279	0.993592	0.0598912
FIGUEROA_AML_METHYLATION_CLUSTER_6_DN	0.0111786	0.454867	0.903165	0.00796675	-0.120294	0.984391	0.00503826	-0.361066	0.370704	0.00470762	-0.283793	0.999279	0.973464	-0.0775717
FIGUEROA_AML_METHYLATION_CLUSTER_6_UP	0.0528168	0.0660707	0.0500226	0.0484339	0.00737387	0.941731	0.0497611	0.0152934	0.654996	0.0493907	0.0185103	0.999279	0.541136	0.0268121
FIGUEROA_AML_METHYLATION_CLUSTER_7_UP	0.0465148	0.0661996	0.178421	0.0399003	-0.0363521	0.768156	0.0443432	-0.00577957	0.868716	0.0421218	-0.016247	0.999279	0.83316	0.00195523
FINAK_BREAST_CANCER_SDPP_SIGNATURE	0.0453106	0.00736876	0.969449	0.0473552	-0.00501459	0.830394	0.0449479	0.00636484	0.940493	0.0468111	-0.0216875	0.999279	0.999798	-0.00324212
FIRESTEIN_CTNNB1_PATHWAY	0.0207711	-0.0191723	0.428949	0.0178071	0	0.929186	0.024754	-0.0181052	0.536083	0.0181892	-0.00275236	0.999279	0.928707	-0.0100075
FIRESTEIN_PROLIFERATION	0.0288069	0.0612053	0.740085	0.0270672	-0.00354638	0.808918	0.0292553	0.0479165	0.60489	0.0270416	0.0134588	0.999279	0.979985	0.0297586
FISCHER_DIRECT_P53_TARGETS_META_ANALYSIS	0.0744124	-0.0081671	0.824894	0.0811479	0.0338336	0.811245	0.0722365	-0.0128608	0.56753	0.0770149	-0.0161514	0.999279	0.982862	-0.000836411
FISCHER_DREAM_TARGETS	0.107056	0.0584948	0.430378	0.0876078	0	0.88876	0.106724	0.106815	0.144732	0.0920852	-0.0279133	0.999279	0.670828	0.0343492
FISCHER_G1_S_CELL_CYCLE	0.0468924	0.021898	0.944165	0.0400773	0.000639847	0.980013	0.0433915	-0.0507228	0.802048	0.0442623	0.0426168	0.999279	0.999738	0.00360797
FISCHER_G2_M_CELL_CYCLE	0.070114	0.0181194	0.824894	0.0640488	0.0507259	0.713482	0.0723436	0.0828713	0.212151	0.0662281	-0.0415384	0.999279	0.842167	0.0275445
FLECHNER_BIOPSY_KIDNEY_TRANSPLANT_OK_VS_DONOR_DN	0.13862	0.0146608	0.79523	0.132766	0.0499479	0.79689	0.135899	0.0208042	0.472292	0.132074	-0.00503433	0.999279	0.965617	0.0200947
FLECHNER_BIOPSY_KIDNEY_TRANSPLANT_OK_VS_DONOR_UP	0.201384	0.00725414	0.709528	0.199453	0.0104521	0.571677	0.199938	0.00242006	0.523973	0.200499	-0.0219534	0.999279	0.928009	-0.000456784
FLECHNER_BIOPSY_KIDNEY_TRANSPLANT_REJECTED_VS_OK_DN	0.126929	-0.0155874	0.443099	0.128475	-0.00758322	0.994328	0.129002	0.00305681	0.883845	0.12919	-0.00259086	0.999279	0.984263	-0.00567617
FLECHNER_BIOPSY_KIDNEY_TRANSPLANT_REJECTED_VS_OK_UP	0.0813826	-0.056058	0.343933	0.0844799	0.021366	0.844774	0.0840609	0.02879	0.123926	0.0855198	0.0241812	0.999279	0.574869	0.00456981
FLECHNER_PBL_KIDNEY_TRANSPLANT_OK_VS_DONOR_DN	0.13122	-0.00495772	0.573463	0.127343	0.00769667	0.885432	0.131239	-0.00330657	0.766532	0.127371	-0.013685	0.999279	0.984236	-0.00356315
FLECHNER_PBL_KIDNEY_TRANSPLANT_OK_VS_DONOR_UP	0.267317	-0.00496746	0.858115	0.266062	0.00796478	0.737654	0.271236	0.0147739	0.0697053	0.266231	0.000351896	0.999279	0.620033	0.00453079
FLECHNER_PBL_KIDNEY_TRANSPLANT_REJECTED_VS_OK_DN	0.209826	-0.00903387	0.731567	0.207095	0.0203322	0.731951	0.212222	0.00500842	0.868716	0.20376	-0.00904578	0.999279	0.992161	0.00181524
FLECHNER_PBL_KIDNEY_TRANSPLANT_REJECTED_VS_OK_UP	0.154405	0.0176577	0.623864	0.149385	-0.00243779	0.89548	0.155283	0.033606	0.0773688	0.149044	-0.0171223	0.999279	0.615428	0.00792589
FLORIO_NEOCORTEX_BASAL_RADIAL_GLIA_DN	0.0422793	0.0228162	0.743397	0.0404962	0.0604061	0.730502	0.0427484	0.150546	0.00866283	0.0425308	0.0648602	0.999279	0.218076	0.0746572
FLORIO_NEOCORTEX_BASAL_RADIAL_GLIA_UP	0.0149323	-0.0690605	0.631682	0.0179919	0.0139091	0.998475	0.0172121	0.00462262	0.872508	0.0182122	0.068316	0.999279	0.996681	0.00444681
FLOTHO_PEDIATRIC_ALL_THERAPY_RESPONSE_DN	0.0284327	0.105076	0.448636	0.0273509	0.0206313	0.829283	0.0258252	0.0305385	0.463012	0.030957	0.181607	0.999279	0.897716	0.0844631
FLOTHO_PEDIATRIC_ALL_THERAPY_RESPONSE_UP	0.498619	-0.00663	0.557718	0.492831	0.00200021	0.895369	0.498153	0.00125894	0.905561	0.488943	-0.0113339	0.999279	0.991135	-0.00367619
FONTAINE_FOLLICULAR_THYROID_ADENOMA_DN	0.139822	-0.0495628	0.0221526	0.137261	-0.0253079	0.718629	0.141566	-0.0329402	0.122548	0.143667	-0.014436	0.999279	0.131023	-0.0305617
FONTAINE_FOLLICULAR_THYROID_ADENOMA_UP	0.0564384	-0.00641712	0.851952	0.0562371	0.00465469	0.932859	0.0566095	-0.0388419	0.189781	0.0546218	0.0383843	0.999279	0.87601	-0.000555006
FONTAINE_PAPILLARY_THYROID_CARCINOMA_DN	0.0102401	-0.315589	0.102425	0.0127671	-0.138804	0.591466	0.01081	-0.347814	0.0215216	0.0138262	0.0866372	0.999279	0.102369	-0.178892
FONTAINE_PAPILLARY_THYROID_CARCINOMA_UP	0.142101	-0.0196762	0.61975	0.151743	0.0384889	0.768156	0.141969	0.00421772	0.683155	0.14795	0.00106685	0.999279	0.972453	0.00602433
FONTAINE_THYROID_TUMOR_UNCERTAIN_MALIGNANCY_DN	0.0723305	-0.147348	0.224424	0.0741884	-0.113026	0.72995	0.076802	-0.104378	0.0144715	0.0795888	0.0014277	0.999279	0.147207	-0.0908309
FONTAINE_THYROID_TUMOR_UNCERTAIN_MALIGNANCY_UP	0.0553657	0.0570954	0.650732	0.0548338	-0.036149	0.89493	0.0485524	-0.0102985	0.680383	0.0546905	-0.0955361	0.999279	0.985192	-0.0212221
FORTSCHEGGER_PHF8_TARGETS_DN	0.0802837	-0.0308993	0.2737	0.0817757	0.00175127	0.980013	0.082139	-0.0189963	0.403707	0.0821499	0.00761121	0.999279	0.814672	-0.0101333
FORTSCHEGGER_PHF8_TARGETS_UP	0.0528959	-0.00946119	0.839847	0.0532888	0.0402426	0.768156	0.0528558	0.0118242	0.586944	0.0505896	-0.0230045	0.999279	0.98269	0.00490027
FOSTER_KDM1A_TARGETS_DN	0.0498798	-0.0320689	0.36602	0.0525957	0.000513506	0.951282	0.0523674	0.0373485	0.30352	0.0509804	-0.0143883	0.999279	0.809825	-0.00214881
FOSTER_KDM1A_TARGETS_UP	0.0259996	-0.0238771	0.588442	0.0290543	0.0186111	0.987537	0.0264159	0.0396829	0.387004	0.0292862	0.0457144	0.999279	0.93525	0.0200328
FOSTER_TOLERANT_MACROPHAGE_DN	0.0734358	-0.037917	0.98824	0.0738447	0.0635492	0.7202	0.074179	-0.00363828	0.834646	0.0736816	-0.00657068	0.999279	0.997961	0.00385581
FOSTER_TOLERANT_MACROPHAGE_UP	0.064851	-0.0298852	0.49444	0.0709615	0.0498712	0.713482	0.0645519	0.0292429	0.496751	0.0693626	0.0127369	0.999279	0.900379	0.0154914
FOURNIER_ACINAR_DEVELOPMENT_LATE_2	0.168043	0.0148322	0.55103	0.156242	0.0459119	0.616574	0.173398	0.0733226	0.162295	0.160507	0.0184174	0.999279	0.669935	0.038121
FOURNIER_ACINAR_DEVELOPMENT_LATE_DN	0.172157	0.119652	0.0500226	0.142659	0	0.956002	0.153707	-0.0242475	0.813704	0.145677	-0.0721378	0.999279	0.592039	0.00581654
FRASOR_RESPONSE_TO_ESTRADIOL_DN	0.0898969	-0.0398988	0.269414	0.0989917	0.00407947	0.84116	0.0920865	-0.0349315	0.339904	0.0966675	-0.0016214	0.999279	0.743748	-0.018093
FRASOR_RESPONSE_TO_ESTRADIOL_UP	0.0873815	0.00853778	0.85523	0.0838172	0.0359423	0.885162	0.0873591	0.0233255	0.608691	0.0824834	0.0311121	0.999279	0.991827	0.0247294
FRASOR_RESPONSE_TO_SERM_OR_FULVESTRANT_DN	0.0613525	-0.0477664	0.804973	0.0573281	0.111597	0.904018	0.0658172	0.2651	0.0885893	0.0615803	0.0707274	0.999279	0.704742	0.0999144
FRASOR_TAMOXIFEN_RESPONSE_UP	0.0722304	-0.0726784	0.348476	0.0749067	0.0406583	0.913305	0.0741335	-0.0533972	0.1198	0.0739774	-0.0240107	0.999279	0.587522	-0.027357
FRIDMAN_IMMORTALIZATION_DN	0.0950793	-0.111962	0.334038	0.10134	0.00145712	0.984391	0.0978619	-0.0398626	0.590961	0.101934	-0.0439202	0.999279	0.915726	-0.048572
FRIDMAN_SENESCENCE_UP	0.151406	-0.041915	0.343933	0.155823	0.010444	0.911012	0.152386	-0.00109886	0.988259	0.158485	-0.0485149	0.999279	0.968522	-0.0202712
FUJII_YBX1_TARGETS_DN	0.0591118	0.0681683	0.847485	0.0513707	0.0718103	0.750298	0.0605826	0.115117	0.200686	0.0525051	0.0490451	0.999279	0.84623	0.0760353
FUJII_YBX1_TARGETS_UP	0.0633907	-0.0690232	0.045574	0.0629562	-0.053747	0.605276	0.0654545	-0.0260978	0.585314	0.0670512	-0.0201909	0.999279	0.409095	-0.0422647
FULCHER_INFLAMMATORY_RESPONSE_LECTIN_VS_LPS_DN	0.0719563	-0.00273707	0.879274	0.0719365	0.020278	0.825292	0.0694373	-0.03144	0.465555	0.0713088	0.000641198	0.999279	0.975285	-0.00331448
FULCHER_INFLAMMATORY_RESPONSE_LECTIN_VS_LPS_UP	0.0965684	-0.0196914	0.224424	0.0997587	0.00759986	0.655269	0.0995526	0.0104003	0.560565	0.0996421	0.0209276	0.999279	0.758333	0.00480907
FURUKAWA_DUSP6_TARGETS_PCI35_DN	0.0428658	0.0376401	0.770872	0.0377636	0.078912	0.541758	0.0455075	0.192695	0.158466	0.0394497	0.0496509	0.999279	0.710538	0.0897244
FURUKAWA_DUSP6_TARGETS_PCI35_UP	0.0779207	-0.0269236	0.513864	0.0826119	-0.00621896	0.90925	0.0799756	-0.00197153	0.847604	0.0844251	-0.00422344	0.999279	0.985165	-0.00983439
GABRIELY_MIR21_TARGETS	0.0474263	0.029446	0.828483	0.04108	0.0772931	0.862353	0.0499652	-0.0621341	0.316235	0.0418269	0.0107509	0.999279	0.935825	0.013839
GAJATE_RESPONSE_TO_TRABECTEDIN_UP	0.173759	-0.0408378	0.178421	0.184383	0.0383363	0.779487	0.176866	0.012751	0.766091	0.183417	0.0158114	0.999279	0.81145	0.00651524
GAL_LEUKEMIC_STEM_CELL_DN	0.0445514	-0.0552125	0.87413	0.0415721	0.0284379	0.878241	0.0456224	0.0932471	0.0840386	0.0431623	0.0290795	0.999279	0.704909	0.023888
GAL_LEUKEMIC_STEM_CELL_UP	0.0345318	-0.130182	0.225289	0.035084	0.0502827	0.92653	0.0409432	0.00872415	0.928569	0.0344409	-0.00516073	0.999279	0.915362	-0.019084
GALE_APL_WITH_FLT3_MUTATED_UP	0.0586106	0.0358874	0.451564	0.0487514	-0.0262488	0.999479	0.0557566	0.0594462	0.56753	0.0554518	0.0154391	0.999279	0.950387	0.021131
GALINDO_IMMUNE_RESPONSE_TO_ENTEROTOXIN	0.236748	0.067191	0.354618	0.224085	0.0384798	0.787684	0.214122	0.00582975	0.996715	0.227926	-0.0130634	0.999279	0.958934	0.0246093
GALLUZZI_PERMEABILIZE_MITOCHONDRIA	0.139911	0.0352081	0.504235	0.143229	0.074263	0.750827	0.136868	0.00852751	0.528082	0.137271	0.00154216	0.999279	0.91973	0.0298852
GARCIA_TARGETS_OF_FLI1_AND_DAX1_DN	0.0726372	0.0202773	0.732947	0.0684425	-0.00786031	0.948854	0.0719026	0.0425725	0.321495	0.0725108	0.058431	0.999279	0.934523	0.0283551
GARCIA_TARGETS_OF_FLI1_AND_DAX1_UP	0.0470748	0.0218032	0.958625	0.0514277	-0.00911316	0.941731	0.0480292	0.0185309	0.46929	0.0478895	-0.0568352	0.999279	0.988446	-0.00640358
GARGALOVIC_RESPONSE_TO_OXIDIZED_PHOSPHOLIPIDS_BLACK_UP	0.0512565	0.0386873	0.977168	0.0456186	0.0409864	0.963061	0.046179	-0.0417601	0.725181	0.046986	-0.0737941	0.999279	0.99934	-0.00897013
GARGALOVIC_RESPONSE_TO_OXIDIZED_PHOSPHOLIPIDS_BLUE_DN	0.0178055	-0.0557678	0.67946	0.0202438	-0.030197	0.994328	0.0186976	-0.0227631	0.49628	0.0177044	-0.0915335	0.999279	0.974737	-0.0500654
GARGALOVIC_RESPONSE_TO_OXIDIZED_PHOSPHOLIPIDS_BLUE_UP	0.0904598	0.0172427	0.769676	0.0896839	0.0578155	0.947551	0.0860287	0.00410193	0.921749	0.0918506	-0.0354874	0.999279	0.999239	0.0109182
GARGALOVIC_RESPONSE_TO_OXIDIZED_PHOSPHOLIPIDS_GREEN_DN	0.0551689	0.152735	0.626177	0.0388261	-0.0323955	0.819001	0.0464779	-0.140965	0.0840386	0.0388103	-0.107668	0.999279	0.614784	-0.0320731
GARGALOVIC_RESPONSE_TO_OXIDIZED_PHOSPHOLIPIDS_GREEN_UP	0.0462125	0.250429	0.13374	0.0455989	0.0437084	0.985519	0.0414899	-0.0590792	0.342241	0.0413565	-0.0779045	0.999279	0.624973	0.0392883
[truncated: 3,119 more rows]

## Sheet: Clone473_AUCell_by_expt
geneset	median.Veh_ExptC	enrichment.Veh_ExptC	adj.p.Veh_ExptC	median.Veh_ExptD	enrichment.Veh_ExptD	adj.p.Veh_ExptD	median.Veh_ExptA	enrichment.Veh_ExptA	adj.p.Veh_ExptA	median.Veh_ExptB	enrichment.Veh_ExptB	adj.p.Veh_ExptB	fisher.combined.pvalue	mean.enrichment
[truncated: 3,835 more rows]

[truncated: 5 more sheets: Clone523_AUCell_by_expt, Clone537_AUCell_by_expt, Clone679_AUCell_by_expt, Clone684_AUCell_by_expt, Data_for_Fig1h]
