# Supplementary material for: Clonal transcriptomics identifies mechanisms of chemoresistance and empowers rational design of combination therapies
Source: bioRxiv preprint, doi:10.1101/2021.12.09.471927, version 2 (2022-06-10)
Supplement: Supplementary Table 6 [file 471927_file08.xlsx]

## Sheet: FindMarkers_JQ1vsVeh
gene	logFC.350_ExptA	adj.p.350_ExptA	logFC.473_ExptA	adj.p.473_ExptA	logFC.537_ExptA	adj.p.537_ExptA	logFC.606_ExptA	adj.p.606_ExptA	logFC.684_ExptA	adj.p.684__ExptA	logFC.350_ExptB	adj.p.350_ExptB	logFC.473_ExptB	adj.p.473_ExptB	logFC.537_ExptB	adj.p.537_ExptB	logFC.606_ExptB	adj.p.606_ExptB	logFC.684_ExptB	adj.p.684_ExptB	mean.logFC_ExptA	mean.logFC_ExptB	fisher_combined_pvalue_ExptA	fisher_combined_pvalue_ExptB	sig.down.both
0610009B22Rik	-0.00610448	1	-0.0291813	1	-0.0314101	1	0.0499102	1	0.039213	1	0.0842551	1	0.0992747	1	-0.0409942	1	-0.0772464	1	0.0153086	1	0.00448547	0.0161196	1	1	FALSE
0610009O20Rik	0.0391967	1	-0.0694257	1	-0.0267157	1	0.0176156	1	-0.00371592	1	0.0399696	1	-0.0257548	1	-0.000932094	1	0.0790269	1	0.0196355	1	-0.008609	0.022389	1	1	FALSE
0610010F05Rik	0.00520918	1	-0.00933978	1	-0.166057	1	0.0488079	1	-0.0482589	0.870525	0.0456706	1	0.0206963	1	0.0314193	1	0.0223834	1	-0.03076	1	-0.0339277	0.0178819	1	1	FALSE
0610010K14Rik	-0.0881811	1	-0.224911	4.05458e-06	-0.195722	1	-0.117673	1	-0.053359	0.501094	-0.0177011	1	-0.307454	1	0.036864	1	-0.273644	1	-0.0384501	1	-0.135969	-0.120077	0.00346372	1	FALSE
0610012G03Rik	0.0106594	1	-0.0516362	1	-0.0590498	1	-0.0225632	1	0.0342623	1	0.135108	1	0.222365	1	-0.04053	1	-0.172082	1	0.0908519	1	-0.0176655	0.0471426	1	1	FALSE
0610030E20Rik	0.0130908	1	-0.0363802	1	0.0636189	1	-0.0119324	1	0.029517	1	0.022278	1	-0.0216946	1	0.0207078	1	0.00682816	1	0.0098603	1	0.0115828	0.00759595	1	1	FALSE
0610037L13Rik	0.0180111	1	-0.0384682	1	-0.0321852	1	-0.013461	1	0.00683715	1	0.0684223	1	-0.0313289	1	-0.067378	1	0.078173	1	-0.0479981	1	-0.0118532	-2.19352e-05	1	1	FALSE
1110002L01Rik	0.0421232	1	0.0179183	1	-0.0198655	1	-0.0189998	1	0.0460194	1	0.0216038	1	0.00152643	1	0.0300975	1	-4.81802e-05	1	-0.102469	1	0.0134391	-0.00985787	1	1	FALSE
1110004E09Rik	-0.0733851	1	-0.0302933	1	-0.043423	1	-0.141472	1	-0.0125684	1	-0.0988319	1	-0.0461312	1	-0.0214862	1	0.0636671	1	-0.00868935	1	-0.0602284	-0.0222943	1	1	FALSE
1110004F10Rik	0.0141149	1	0.0291351	1	-0.0302484	1	0.10606	1	0.0100444	1	-0.206023	1	-0.00605314	1	-0.0620971	1	-0.200315	1	-0.501821	1	0.0258211	-0.195262	1	1	FALSE
1110008F13Rik	-0.103183	1	0.0184852	1	-0.0635157	1	0.08846	1	-0.114753	0.289858	0.123269	1	-0.0631666	1	-0.0204192	1	-0.237848	1	0.0214883	1	-0.0349012	-0.0353352	0.991211	1	FALSE
1110008L16Rik	0.00892853	1	-0.00235418	1	0.0788802	1	-0.0197863	1	0.00695998	1	-0.0153752	1	-0.0232897	1	0.00236405	1	0.0203266	1	0.0399817	1	0.0145256	0.00480148	1	1	FALSE
1110008P14Rik	0.679712	1.44968e-08	0.49162	0.00581506	0.190675	1	0.636549	1	-0.110082	1	0.567092	0.000370835	0.257823	1	0.23326	1	0.547163	1	0.11548	1	0.377695	0.344164	1.21707e-06	0.105517	FALSE
1110012L19Rik	-0.0437358	1	0.0234626	1	-0.0372734	1	0.0129067	1	-0.0397638	0.544973	-0.0219442	1	-0.0924793	1	0.111075	1	0.059646	1	-0.0119592	1	-0.0168807	0.00886765	0.999584	1	FALSE
1110032A03Rik	-0.0033125	1	0.0579917	1	-0.0183732	1	-0.0400917	1	-0.00560937	1	0.0385606	1	0.0636115	1	0.000337584	1	0.0603517	1	0.0463963	1	-0.00187902	0.0418516	1	1	FALSE
1110038F14Rik	-0.322171	1.4155e-15	-0.112323	1	-0.241865	1	-0.147082	1	-0.259683	3.79038e-23	-0.150768	1	0.0120384	1	0.0330388	1	-0.0276519	1	0.0797431	1	-0.216625	-0.01072	1.2711e-31	1	FALSE
1110046J04Rik	-0.0550739	0.40453	-0.0336213	1	-0.0968383	1	-0.00166315	1	-0.0737244	5.37937e-06	0.05594	1	0.10825	1	-0.066294	1	-0.0972821	1	0.0221685	1	-0.0521842	0.00455645	0.00363938	1	FALSE
1110059E24Rik	-0.00119473	1	-0.0795557	1	-0.0307158	1	-0.0491417	1	-0.0627147	1	-0.0249431	1	0.00812219	1	-0.0533759	1	-0.0483974	1	-0.0762459	1	-0.0446645	-0.038968	1	1	FALSE
1110059G10Rik	0.00764411	1	0.0132166	1	-0.055391	1	-0.0496083	1	-0.0156593	1	0.0520192	1	-0.0636431	1	0.0313361	1	-0.0296997	1	-0.0668437	1	-0.0199596	-0.0153662	1	1	FALSE
1110065P20Rik	0.0227654	1	-0.0801498	1	0.0501395	1	0.0290191	1	0.052512	1	0.0609552	1	0.137277	1	0.00504204	1	0.122976	1	0.0427856	1	0.0148572	0.0738073	1	1	FALSE
1190002N15Rik	0.028053	1	-0.0115545	1	-0.02074	1	0.0208536	1	-0.0203754	1	0.0144519	1	0.00877834	1	-0.0134645	1	0.00134339	1	0.0194454	1	-0.000752656	0.00611091	1	1	FALSE
1190005I06Rik	-0.00113892	1	-0.0264901	1	-0.0425392	1	-0.00911832	1	-0.0449084	0.0021892	-0.127031	1	-0.0407566	1	-0.0309628	1	-0.150663	1	0.0239846	1	-0.024839	-0.0650858	0.268774	1	FALSE
1190007I07Rik	0.0584865	1	-0.0235616	1	-0.0166907	1	-0.126156	1	0.0688843	1	0.00582041	1	0.0215208	1	0.000384402	1	0.0345979	1	0.0906678	1	-0.00780743	0.0305983	1	1	FALSE
1300002E11Rik	0.0152437	1	-0.00633903	1	0.0342589	1	-0.0235857	1	-0.0234198	1	-0.141789	1	-0.00111262	1	-0.0285877	1	-0.137967	1	0.0345434	1	-0.000768389	-0.0549826	1	1	FALSE
1500011B03Rik	-0.0307032	1	-0.0425834	1	0.0178074	1	-0.0477806	1	-0.0211547	1	0.0259819	1	-0.121945	1	-0.0648111	1	0.0428063	1	0.034489	1	-0.0248829	-0.0166957	1	1	FALSE
1500011K16Rik	0.104713	1	0.0915479	1	0.186619	1	-0.0567972	1	0.0317264	1	0.069544	1	-0.034088	1	0.0547685	1	0.0113577	1	0.244108	1	0.0715619	0.069138	1	1	FALSE
1600002K03Rik	-0.0184759	1	-0.0240332	1	-0.0562206	1	-0.0712955	1	-0.0349976	1	0.0336724	1	0.0256959	1	0.422495	1	-0.0129222	1	-0.0220008	1	-0.0410045	0.089388	1	1	FALSE
1600012H06Rik	-0.00571524	1	-0.0443362	1	0.0940349	1	0.172927	1	0.0208224	1	-0.0356036	1	0.0569715	1	-0.0723883	1	-0.0220724	1	-0.0321919	1	0.0475465	-0.021057	1	1	FALSE
1600020E01Rik	-0.000331222	1	-0.00442528	1	0.0634315	1	-0.033272	1	-0.00696004	1	0.00669015	1	-0.0145193	1	0.0580639	1	-0.00566732	1	-0.0249638	1	0.00368858	0.00392071	1	1	FALSE
1700006J14Rik	-0.0590394	0.00792184	-0.109525	0.000438422	-0.0947606	1	-0.0795774	1	-0.0819527	9.46428e-11	-0.0215114	1	-0.018829	1	-0.0472046	1	-0.0241284	1	-0.0129819	1	-0.084971	-0.0249311	2.48293e-11	1	FALSE
1700017B05Rik	-0.0459486	1	0.00926354	1	-0.0446007	1	-0.108052	1	-0.0583679	0.00018496	-0.012452	1	-0.0107459	1	0.0528435	1	0.0588081	1	0.00128755	1	-0.0495411	0.0179482	0.0702485	1	FALSE
1700020I14Rik	0.00733515	1	-0.0291207	1	0.0339026	1	0.0898893	1	-0.045346	1	0.0702178	1	0.0196585	1	0.0208311	1	0.00913278	1	0.0336706	1	0.0113321	0.0307022	1	1	FALSE
1700021F05Rik	-0.0210272	1	-0.0254654	1	-0.115217	1	-0.0541859	1	-0.035558	1	-0.050886	1	-0.0268704	1	0.0375429	1	0.00771221	1	-0.196394	1	-0.0502906	-0.0457791	1	1	FALSE
1700025G04Rik	0.000806176	1	0.0243831	1	-0.00713939	1	0.138901	1	0.0823214	1	0.060695	1	0.0467367	1	-0.00911305	1	0.0314957	1	-0.0204599	1	0.0478545	0.0218709	1	1	FALSE
1700030K09Rik	-0.00768397	1	0.00209189	1	-0.0257235	1	-0.0413325	1	-0.00132482	1	-0.328383	1	0.00695629	1	0.0117332	1	-0.0655024	1	-0.128014	1	-0.0147946	-0.100642	1	1	FALSE
1700037C18Rik	0.0121463	1	0.0151848	1	0.0139381	1	0.03738	1	0.0153215	1	0.0166223	1	-0.0102597	1	0.062378	1	0.0340621	1	-0.00892793	1	0.0187941	0.018775	1	1	FALSE
1700037H04Rik	0.0269165	1	0.166829	1	-0.138985	1	-0.00708233	1	-0.0751369	1.42313e-05	0.0698234	1	-0.0348876	1	-0.00774357	1	-0.0318404	1	-0.16382	1	-0.00549181	-0.0336937	0.0135542	1	FALSE
1700052K11Rik	-0.0148376	1	0.0467515	1	0.0384829	1	-0.207219	1	-0.0283505	1	-0.0217407	1	-0.0551323	1	-0.0823693	1	-0.0629591	1	-0.0313433	1	-0.0330345	-0.0507089	1	1	FALSE
1700086O06Rik	-0.00538395	1	-0.0155769	1	0.0266518	1	0.0202787	1	-0.0311733	1	0.0353069	1	0.10632	1	0.0170242	1	-0.102922	1	0.0133712	1	-0.00104074	0.01382	1	1	FALSE
1700088E04Rik	0.0408961	1	0.0661363	1	0.0378636	1	0.0413814	1	0.00984453	1	-0.075388	1	0.0714371	1	0.100954	1	0.0351944	1	0.0419152	1	0.0392244	0.0348224	1	1	FALSE
1700113A16Rik	0.0200353	1	-0.0473533	1	0.0761218	1	-0.012852	1	0.0133868	1	-0.0864792	1	-0.00695962	1	-0.0410726	1	0.0281975	1	-0.00104406	1	0.00986772	-0.0214716	1	1	FALSE
1700123O20Rik	-0.103789	0.244495	-0.0166437	1	-0.0077788	1	0.0226094	1	-0.0483557	1	-0.0551379	1	0.0476939	1	-0.00510553	1	-0.0201395	1	-0.0173046	1	-0.0307915	-0.00999873	0.985406	1	FALSE
1810009A15Rik	-0.0119039	1	-0.0490215	1	-0.0578443	1	-0.0286596	1	0.0115412	1	0.00138988	1	0.0186371	1	-0.0500112	1	-0.0223874	1	0.0116665	1	-0.0271776	-0.00814102	1	1	FALSE
1810013L24Rik	0.0158487	1	-0.0513215	1	0.010856	1	-0.0501278	1	-0.00392351	1	-0.0369705	1	-0.0900181	1	-0.113367	1	0.0685982	1	0.0949255	1	-0.0157336	-0.0153665	1	1	FALSE
1810022K09Rik	-0.0322051	1	-0.145047	1	-0.0793876	1	-0.0279843	1	-0.17425	4.1678e-09	-0.152114	1	-0.326052	1	-0.278574	1	-0.217808	1	0.0081745	1	-0.0917748	-0.193275	2.99253e-05	1	FALSE
1810030O07Rik	-0.039263	1	-0.0455623	1	0.00298316	1	0.104721	1	-0.0725202	0.0218759	0.0270826	1	0.0488627	1	-0.0190148	1	-0.0435684	1	-0.13691	1	-0.00992821	-0.0247095	0.663494	1	FALSE
1810032O08Rik	0.0865381	1	-0.0712295	1	0.015514	1	-0.172156	1	0.0125935	1	-0.022027	1	0.0413849	1	-0.058774	1	-0.0347597	1	0.0764207	1	-0.025748	0.000448977	1	1	FALSE
1810037I17Rik	0.00945933	1	0.0404452	1	0.133427	1	-0.0126089	1	0.0591025	1	-0.0589087	1	-0.222926	1	-0.196716	1	-0.224312	1	0.0311702	1	0.045965	-0.134339	1	1	FALSE
1810043G02Rik	0.0618244	1	-0.00812434	1	0.0684529	1	0.0343987	1	0.0791707	1	0.0308692	1	0.0231092	1	0.150911	1	-0.023794	1	0.0625763	1	0.0471445	0.0487343	1	1	FALSE
1810055G02Rik	0.0408658	1	-0.0136188	1	-0.00329325	1	0.0454201	1	0.0151085	1	0.1083	1	-0.0870897	1	-0.070571	1	-0.0175352	1	0.0686793	1	0.0168965	0.000356695	1	1	FALSE
1810058I24Rik	0.00889249	1	0.0792107	1	0.259173	1	0.0299915	1	0.0107605	1	0.211749	1	0.135297	1	0.183703	1	0.143545	1	0.0685727	1	0.0776056	0.148573	1	1	FALSE
1810062G17Rik	0.0275509	1	0.023278	1	0.0684493	1	-0.0260858	1	0.0139437	1	0.025439	1	-0.00339975	1	-0.0712529	1	-0.00322568	1	0.0559855	1	0.0214272	0.000709232	1	1	FALSE
2010107E04Rik	-0.162787	0.00441139	-0.0311545	1	-0.0814802	1	0.0754808	1	-0.0490651	1	-0.325639	1.06377e-05	-0.35206	0.128123	-0.233987	1	-0.406768	1	-0.226907	1	-0.0498012	-0.309072	0.369551	0.00259322	FALSE
2010111I01Rik	-0.0210075	1	0.0904095	1	0.265705	1	-0.0330792	1	0.0425156	1	0.0505706	1	0.144601	1	-0.104206	1	-0.10066	1	0.10865	1	0.0689087	0.0197911	1	1	FALSE
2010300F17Rik	-0.12152	3.53206e-07	-0.00942006	1	-0.0900621	1	-0.10067	1	-0.13299	5.01756e-19	-0.14405	1	-0.0089269	1	0.0977989	1	-0.0126766	1	0.0316413	1	-0.0909324	-0.00724262	8.36731e-20	1	FALSE
2010320M18Rik	0.12573	1	-0.000808919	1	0.137847	1	-0.0783788	1	0.0468613	1	0.0760666	1	0.0506195	1	0.00173346	1	-0.0925109	1	0.11819	1	0.0462501	0.0308198	1	1	FALSE
2200002D01Rik	0.037344	1	0.103929	1	0.293129	1	0.304323	1	-0.0397328	1	0.145156	1	0.1731	1	0.560718	1	0.18641	1	0.0248116	1	0.139798	0.218039	1	1	FALSE
2210016L21Rik	-0.105165	1	0.125986	1	0.0301944	1	0.148985	1	-0.0268199	1	0.0729468	1	-0.00862209	1	0.15614	1	0.10438	1	0.0772875	1	0.0346362	0.0804265	1	1	FALSE
2210408I21Rik	0.0166575	1	0.0203616	1	0.0200831	1	-0.0180623	1	-0.0244953	1	0.0169957	1	-0.0571755	1	-0.055304	1	0.0222976	1	-0.204213	1	0.00290892	-0.0554798	1	1	FALSE
2300009A05Rik	0.0151641	1	-0.0662362	1	0.158285	1	-0.00924889	1	-0.0351471	1	0.0923075	1	0.0880185	1	-0.173336	1	0.135251	1	0.116475	1	0.0125634	0.0517433	1	1	FALSE
2310001H17Rik	0.0467113	1	-0.0158782	1	0.0214508	1	0.0583244	1	0.0408607	1	0.0327849	1	-0.0389158	1	0.0535565	1	-6.8043e-05	1	0.0106509	1	0.0302938	0.0116017	1	1	FALSE
2310009B15Rik	0.0205631	1	0.203191	1	0.183235	1	0.127254	1	0.0508201	1	0.201132	1	0.279244	0.00267616	0.0645256	1	0.0685873	1	0.179599	1	0.117012	0.158617	1	0.295444	FALSE
2310011J03Rik	-0.0314724	1	-0.024714	1	0.125146	1	-0.0828681	1	-0.0338223	1	0.14021	1	-0.10133	1	0.0490697	1	-0.0670704	1	0.0717093	1	-0.00954609	0.0185178	1	1	FALSE
2310022A10Rik	-0.00956881	1	-0.021016	1	-0.00855587	1	0.00436677	1	0.0153877	1	-0.0487476	1	0.0132261	1	-0.0063183	1	-0.0126416	1	0.0139594	1	-0.00387724	-0.0081044	1	1	FALSE
2310022B05Rik	-0.0161583	1	-0.056778	1	-0.00727874	1	-0.0334942	1	-0.0554046	0.024673	-0.003168	1	-0.017152	1	-0.0428284	1	0.0701709	1	0.0209068	1	-0.0338228	0.00558586	0.686824	1	FALSE
2310030G06Rik	0.000373737	1	-0.0268624	1	0.0537944	1	-0.111648	1	0.0520037	1	-0.0262347	1	-0.0737848	1	0.0230853	1	0.00825224	1	0.0625985	1	-0.00646775	-0.0012167	1	1	FALSE
2310033P09Rik	0.0955888	1	0.0368413	1	0.0904627	1	0.268707	1	0.169174	0.00234102	0.116709	1	0.0963207	1	0.0560744	1	0.263625	1	0.113793	1	0.132155	0.129305	0.277477	1	FALSE
2310035C23Rik	-0.026191	1	-0.0976329	1	-0.0864056	1	-0.0862737	1	-0.0119094	1	0.0350693	1	0.0423357	1	-0.0434053	1	0.00812903	1	-0.0467854	1	-0.0616825	-0.000931345	1	1	FALSE
2310039H08Rik	0.0975458	1	0.0267085	1	0.220127	1	-0.0370257	1	0.0424196	1	0.110703	1	0.0965973	1	-0.016052	1	0.134547	1	0.14687	1	0.0699551	0.0945329	1	1	FALSE
2310057M21Rik	-0.00394506	1	-0.0816729	0.126855	-0.0337699	1	-0.115181	1	-0.031071	1	-0.0483365	1	0.0137147	1	0.0273753	1	-0.00224253	1	-0.0218868	1	-0.0531279	-0.00627517	0.94132	1	FALSE
2310061I04Rik	0.0275873	1	-0.114242	0.161894	-0.0450466	1	-0.0454056	1	0.080026	1	0.00999368	1	-0.0139425	1	-0.0426725	1	-0.207936	1	-0.00261664	1	-0.0194161	-0.0514348	0.962069	1	FALSE
2410002F23Rik	-0.00721951	1	-0.01841	1	-0.0595975	1	0.0890651	1	-0.00822281	1	0.0442143	1	0.0507382	1	-0.0180337	1	-0.00251205	1	-0.0613602	1	-0.000876945	0.00260931	1	1	FALSE
2410004B18Rik	-0.0880365	1	-0.058774	1	-0.0456169	1	-0.0767923	1	-0.0725352	0.595936	-0.0381901	1	0.0632074	1	-0.143055	1	-0.254811	1	0.00268917	1	-0.068351	-0.0740321	0.999798	1	FALSE
2410015M20Rik	-0.00342044	1	0.185976	1	0.261583	1	0.143359	1	0.0204757	1	0.0246391	1	0.173437	0.902524	-0.0178236	1	0.319677	1	0.222274	1	0.121595	0.144441	1	1	FALSE
2410089E03Rik	0.00182537	1	-0.0818865	1	-0.0701232	1	-0.201225	1	-0.174151	6.09804e-10	-0.0147017	1	0.000476318	1	-0.139742	1	0.122173	1	0.00785732	1	-0.105112	-0.00478736	6.27141e-06	1	FALSE
2410131K14Rik	-0.0107908	1	-0.0473293	1	-0.0409113	1	-0.0222465	1	-0.0183814	1	0.0277152	1	-0.00742078	1	0.0455185	1	0.00896602	1	0.0348479	1	-0.0279319	0.0219254	1	1	FALSE
2510002D24Rik	0.0117883	1	0.000561886	1	9.73919e-05	1	0.127997	1	0.0204214	1	0.0558571	1	-0.00147867	1	0.098532	1	0.105512	1	0.0444323	1	0.0321733	0.060571	1	1	FALSE
2510017J16Rik	-0.0126969	1	-0.031353	1	-0.140674	1	-0.0240853	1	0.00513339	1	-0.00199515	1	0.0150591	1	-0.0221956	1	-0.0269295	1	-0.0124482	1	-0.0407351	-0.00970187	1	1	FALSE
2510039O18Rik	-0.0502062	1	-0.0284648	1	0.0954971	1	0.0532065	1	-0.00717087	1	-0.0264468	1	-0.0411879	1	0.0117257	1	-0.057968	1	-0.19098	1	0.0125723	-0.0609715	1	1	FALSE
2610001J05Rik	-0.0710367	0.813568	-0.0106565	1	-0.0115982	1	-0.0621508	1	-0.0776191	0.00536814	-0.159859	1	0.0357243	1	-0.00720137	1	0.00381069	1	-0.00754031	1	-0.0466122	-0.0270131	0.367958	1	FALSE
2610002M06Rik	-0.108794	0.00258184	-0.0468734	1	-0.097608	1	-0.0240691	1	-0.0764817	0.00329117	-0.0989333	1	-0.0497632	1	-0.029874	1	-0.110674	1	-0.0414305	1	-0.0707652	-0.066135	0.00952082	1	FALSE
2610008E11Rik	0.0120487	1	0.0206017	1	0.00078334	1	-0.018019	1	-0.0650475	0.000158504	0.0422615	1	0.00955485	1	0.000153222	1	0.105726	1	-0.0254703	1	-0.00992655	0.026445	0.0640172	1	FALSE
2610020C07Rik	0.00223653	1	-0.0258421	1	0.0216781	1	0.0182983	1	-0.0140253	1	-0.00161206	1	0.00717243	1	0.027219	1	0.00413435	1	0.0135198	1	0.000469111	0.0100867	1	1	FALSE
2610021A01Rik	-0.00693685	1	-0.00952059	1	-0.0230308	1	0.0248376	1	-0.00103738	1	0.0196782	1	0.0114741	1	-0.000930122	1	0.00597067	1	0.0189914	1	-0.0031376	0.0110368	1	1	FALSE
2610037D02Rik	0.00814731	1	-0.0356156	1	-0.0117317	1	-0.151368	1	-0.0404792	1	0.0284438	1	-0.0255564	1	-0.00900724	1	0.0410043	1	-0.00141293	1	-0.0462095	0.00669431	1	1	FALSE
2610044O15Rik8	0.0195622	1	-0.0395975	1	-0.0118388	1	-0.0488131	1	0.00608117	1	0.0114067	1	-0.0356701	1	0.00566878	1	0.0299895	1	0.0712693	1	-0.0149212	0.0165329	1	1	FALSE
2610301B20Rik	0.0296488	1	0.0475923	1	0.0785167	1	0.0400245	1	0.026139	1	-0.182375	1	0.00199691	1	0.0150436	1	-0.0490651	1	0.00132863	1	0.0443843	-0.0426142	1	1	FALSE
2610507B11Rik	-0.0373907	1	-0.177316	0.123233	-0.0523316	1	-0.160682	1	0.0505772	1	0.0130098	1	0.00757109	1	-0.0921791	1	-0.0102708	1	-0.0731712	1	-0.0754287	-0.031008	0.9385	1	FALSE
2700016F22Rik	0.0192458	1	0.0834787	1	0.0600819	1	-0.00145706	1	0.0290623	1	-0.0320661	1	-0.0138066	1	-0.0442772	1	-0.0087331	1	-0.039988	1	0.0380823	-0.0277742	1	1	FALSE
2700038G22Rik	0.0105926	1	-0.101134	1	-0.0020775	1	0.00279407	1	-0.0208536	1	-0.0480024	1	0.0145884	1	0.00972616	1	0.0314565	1	-0.00971928	1	-0.0221357	-0.000390133	1	1	FALSE
2700049A03Rik	-0.0263974	1	4.91433e-05	1	-0.0238495	1	0.016991	1	0.0125862	1	-0.00997695	1	-0.0130985	1	-0.03266	1	-0.0351851	1	0.0462368	1	-0.00412412	-0.00893674	1	1	FALSE
2700062C07Rik	-0.0634756	1	-0.00524285	1	-0.0626102	1	0.0902328	1	-0.0359935	1	0.0392821	1	-0.0145028	1	0.0164976	1	-0.0120079	1	0.0253923	1	-0.0154179	0.0109323	1	1	FALSE
2700081O15Rik	-0.0669215	1	0.0361071	1	-0.0747343	1	0.0343895	1	-0.185627	2.7197e-13	-0.0298834	1	-0.125243	1	-0.107515	1	-0.0123691	1	-0.152984	1	-0.0513573	-0.0855989	9.16111e-09	1	FALSE
2700097O09Rik	0.00843148	1	0.043082	1	0.00720445	1	-0.0273395	1	-0.00566589	1	0.0508339	1	-0.0317023	1	0.00935219	1	0.0100064	1	0.0401588	1	0.00514252	0.0157298	1	1	FALSE
2810004N23Rik	-0.0179251	1	-0.331793	0.00033962	-0.000670204	1	0.156566	1	-0.0699215	1	-0.136201	1	-0.201449	1	-0.165209	1	0.16636	1	-0.0650987	1	-0.0527487	-0.0803196	0.10034	1	FALSE
2810006K23Rik	0.0133655	1	-0.00224312	1	-0.0248951	1	0.0374634	1	0.0108095	1	-0.148267	1	0.0139098	1	-0.00289203	1	-0.0191243	1	0.0672552	1	0.00690003	-0.0178237	1	1	FALSE
2810402E24Rik	0.0481346	1	0.0520108	1	-0.00572837	1	0.0402877	1	0.0166754	1	0.0101618	1	-0.0737027	1	-0.0564368	1	0.0663581	1	-0.00172614	1	0.030276	-0.0110692	1	1	FALSE
2810403A07Rik	-0.0491516	1	-0.113133	1	-0.208743	1	-0.267839	1	-0.131794	3.167e-07	-0.0196887	1	-0.00380526	1	-0.110133	1	0.0164128	1	-0.0732475	1	-0.154132	-0.0380923	0.000879313	1	FALSE
2810408A11Rik	-0.00284539	1	0.058044	1	0.0876198	1	0.0436278	1	-0.0214788	1	0.026735	1	0.0237473	1	0.0559679	1	-0.0427207	1	0.0181111	1	0.0329935	0.0163681	1	1	FALSE
2810454H06Rik	-0.0609781	1	-0.0468667	1	0.0221722	1	-0.0370415	1	-0.0126427	1	0.0200448	1	0.0051574	1	-0.00512079	1	0.00043148	1	0.0247544	1	-0.0270714	0.00905345	1	1	FALSE
2810457G06Rik	0.0332913	1	0.00846131	1	-0.0719469	1	0.0416203	1	-0.0115009	1	-0.000300449	1	0.00617487	1	0.0114378	1	0.0113582	1	0.054659	1	-1.49791e-05	0.0166659	1	1	FALSE
2810474O19Rik	0.145671	1	-0.17958	1	0.210917	1	-0.0220045	1	-0.050371	1	0.0628198	1	0.20395	1	-0.0913629	1	0.0172947	1	0.228232	1	0.0209266	0.0841868	1	1	FALSE
2900009J06Rik	0.138366	0.252472	0.0445258	1	0.0545519	1	0.119378	1	0.0953031	0.0404709	0.135843	1	0.0424295	1	0.0117103	1	0.0702362	1	0.157373	1	0.0904249	0.0835183	0.516308	1	FALSE
2900026A02Rik	-0.0128509	1	-0.0298049	1	-0.00978212	1	0.0822436	1	0.0329779	1	0.0367335	1	-0.0516101	1	-0.184161	1	-0.0164416	1	-0.0233805	1	0.0125567	-0.047772	1	1	FALSE
2900060B14Rik	0.0304178	1	0.0366473	1	0.0441066	1	-0.00917676	1	-0.00690061	1	0.0614872	1	0.0318449	1	0.022678	1	0.124774	1	0.0832101	1	0.0190189	0.0647989	1	1	FALSE
2900076A07Rik	-0.00645505	1	-0.0427901	1	-0.0387805	1	-0.0567967	1	-0.0173584	1	-0.0181255	1	-0.0100474	1	-0.0262768	1	-0.0730957	1	-0.0330107	1	-0.0324361	-0.0321112	1	1	FALSE
2900093K20Rik	0.0146299	1	-0.0439611	1	-0.000797998	1	0.0883034	1	-0.0235477	1	-0.0879017	1	0.0159285	1	0.0164494	1	0.0286035	1	-0.0261732	1	0.00692529	-0.0106187	1	1	FALSE
2900097C17Rik	0.112627	1	0.0427295	1	0.0259524	1	-0.17214	1	-0.0591812	1	-0.114303	1	-0.035495	1	-0.0201159	1	-0.0516364	1	-0.235184	1	-0.0100024	-0.0913469	1	1	FALSE
3010003L21Rik	0.000344919	1	0.00899999	1	-0.00731855	1	0.0838758	1	0.00814048	1	0.00713911	1	-0.00784796	1	-0.0638847	1	-0.03025	1	-0.00995754	1	0.0188085	-0.0209602	1	1	FALSE
3110002H16Rik	0.0149994	1	-0.0385421	1	-0.0584737	1	-0.00419486	1	0.0134997	1	-0.0475187	1	-0.107449	1	-0.0477226	1	-0.0177495	1	-0.0181111	1	-0.0145423	-0.0477101	1	1	FALSE
3110009E18Rik	0.0540008	1	-0.024102	1	0.0538701	1	-0.0629702	1	0.0643817	1	-0.00514501	1	0.0954683	1	0.0557209	1	0.0312278	1	0.0437908	1	0.0170361	0.0442126	1	1	FALSE
3110040N11Rik	0.0280731	1	-0.0160216	1	0.0511534	1	-0.106196	1	-0.0184636	1	-0.0156905	1	0.0327519	1	0.127011	1	0.0323829	1	-0.0281749	1	-0.0122908	0.0296561	1	1	FALSE
3110043O21Rik	-0.0145259	1	-0.061675	1	-0.0718299	1	0.0226189	1	-0.0334027	1	-0.279142	1	-0.102709	1	-0.0674182	1	0.0863387	1	0.00371225	1	-0.0317629	-0.0718436	1	1	FALSE
3110062M04Rik	-0.0198419	1	0.00139666	1	0.0156108	1	0.278035	1	-0.0284057	1	0.00213459	1	-0.0126972	1	0.00582638	1	-0.0448517	1	-0.017565	1	0.0493589	-0.0134306	1	1	FALSE
3110082I17Rik	0.0252259	1	0.069589	1	0.0731427	1	0.0056569	1	0.0141878	1	0.012835	1	-0.0425932	1	0.0196769	1	0.0937429	1	-0.0232591	1	0.0375605	0.0120805	1	1	FALSE
3300005D01Rik	0.166144	1	0.372352	0.0869042	0.406465	1	0.0114212	1	0.189484	1.00301e-06	0.294228	0.00274573	0.156147	1	-0.00668914	1	0.0512589	1	0.126282	1	0.229173	0.124245	0.00032901	0.298982	FALSE
3830406C13Rik	-0.0210956	1	0.0107739	1	0.00312179	1	-0.0210799	1	-0.071968	0.00204699	-0.0218832	1	0.0202715	1	0.0224685	1	-0.330244	1	-0.0246476	1	-0.0200495	-0.0668069	0.260256	1	FALSE
4632415L05Rik	-0.0105117	1	0.00779879	1	-0.0489892	1	-0.00435221	1	-0.0132695	1	-0.0605709	1	-0.0433771	1	-0.0469428	1	0.0159968	1	-0.039813	1	-0.0138648	-0.0349414	1	1	FALSE
4732440D04Rik	-0.00488656	1	0.0272164	1	0.0692642	1	-0.0457793	1	-0.0211664	1	0.0171647	1	0.0156073	1	0.00860585	1	0.066401	1	0.0261918	1	0.00492967	0.0267942	1	1	FALSE
4833420G17Rik	-0.00345307	1	-0.0392288	1	0.0122231	1	-0.22415	1	-0.0422525	1	-0.0637577	1	0.00401953	1	-0.0426605	1	-0.038303	1	-0.100852	1	-0.0593722	-0.0483108	1	1	FALSE
4833439L19Rik	-0.0247556	1	-0.0723119	1	0.00719481	1	-0.12137	1	-0.026674	1	-0.11571	1	-0.054065	1	-0.00175766	1	-0.0220576	1	-0.00699632	1	-0.0475832	-0.0401173	1	1	FALSE
4921524J17Rik	-0.145466	0.00261235	-0.145732	1	-0.0643995	1	-0.0828517	1	-0.134711	1.39276e-06	-0.078771	1	-0.15646	1	-0.200712	1	-0.0646475	1	0.0133955	1	-0.114632	-0.0974391	2.68249e-05	1	FALSE
4930402H24Rik	0.00838755	1	0.00215975	1	-0.0393909	1	-0.111752	1	-0.0827378	6.04025e-11	0.00999981	1	-0.0106988	1	-0.0101301	1	-0.118721	1	0.0261724	1	-0.0446668	-0.0206756	9.20844e-07	1	FALSE
4930403P22Rik	0.00045699	1	-0.014353	1	-0.0209221	1	0.00471256	1	-0.0117645	1	0.0167872	1	0.0144124	1	0.0239856	1	0.048156	1	0.0235578	1	-0.00837403	0.0253798	1	1	FALSE
4930430F08Rik	0.0394413	1	0.0042917	1	-0.0394097	1	-0.0172828	1	0.0300382	1	0.0169307	1	0.0259982	1	0.0595296	1	0.00319074	1	0.0160944	1	0.00341572	0.0243488	1	1	FALSE
4930453N24Rik	-0.0284113	1	-0.0712114	1	-0.13976	1	0.0860908	1	-0.00323571	1	-0.0879549	1	-0.0280079	1	-0.355999	1	-0.0540209	1	0.0104937	1	-0.0313055	-0.103098	1	1	FALSE
4930503L19Rik	0.0242174	1	0.00232814	1	-0.0449904	1	0.0959493	1	-0.0117267	1	0.0151672	1	-0.00196578	1	0.0530073	1	-0.0027151	1	0.0369039	1	0.0131556	0.0200795	1	1	FALSE
4930522L14Rik	-0.0241859	1	-0.0160874	1	-0.0287573	1	-0.0115526	1	-0.0118423	1	0.000307569	1	-0.0151631	1	0.00949894	1	-0.109525	1	0.0100022	1	-0.0184851	-0.020976	1	1	FALSE
4930523C07Rik	-0.0612736	1	0.159897	1	0.0315793	1	-0.582036	1	-0.38093	3.84765e-07	-0.253338	1	-0.151368	1	-0.445405	1	-0.37209	1	-0.34729	1	-0.166553	-0.313898	0.00101779	1	FALSE
4930579C12Rik	-0.175025	1	-0.425401	0.00725984	0.169406	1	-0.0607669	1	-0.0639509	1	-0.307668	1	-0.171044	0.224143	-0.00646642	1	-0.0932808	1	-0.144658	1	-0.111147	-0.144623	0.45368	0.981636	FALSE
4930579G24Rik	0.00748742	1	0.00421348	1	-0.0516336	1	0.00698201	1	0.0348457	1	0.0155286	1	0.0217293	1	0.0302348	1	-0.0148807	1	0.0372912	1	0.000378996	0.0179806	1	1	FALSE
4931406C07Rik	0.00897466	1	0.0246252	1	0.0516192	1	0.128201	1	-0.0102265	1	0.0639105	1	-0.126254	1	0.0203773	1	0.00709547	1	0.102671	1	0.0406387	0.0135602	1	1	FALSE
4931406P16Rik	-0.033097	1	-0.000847772	1	-0.0798789	1	-0.127959	1	-0.0588803	1	-0.0312806	1	-0.0920033	1	-0.00845914	1	-0.0248775	1	-0.041211	1	-0.0601325	-0.0395663	1	1	FALSE
4931428F04Rik	-0.0251784	1	-0.0248274	1	-0.061106	1	-0.0434497	1	-0.0295214	0.00139745	-0.0160137	0.0340431	-0.0370173	1	-0.0264226	1	-0.00205144	1	-0.0292193	1	-0.0368166	-0.0221449	0.215611	0.747868	FALSE
4932422M17Rik	0.00640026	1	-0.0236789	1	-0.0676653	1	-0.201507	1	-0.0249391	1	-0.0540901	1	-0.0210954	1	-0.0154177	1	0.0239495	1	-0.0394914	1	-0.062278	-0.021229	1	1	FALSE
4932438A13Rik	0.0288654	1	0.00240226	1	-0.127701	1	-0.133759	1	-0.00658232	1	-0.0139159	1	0.065993	1	-0.0305396	1	0.145328	1	0.107098	1	-0.0473549	0.0547929	1	1	FALSE
4933404O12Rik	-0.0299277	1	-0.0173212	1	-0.0169539	1	-0.00850519	1	-0.0158425	1	0.00681412	1	-0.0265434	1	0.0253636	1	0.00911449	1	-0.00159666	1	-0.0177101	0.00263042	1	1	FALSE
4933427D14Rik	0.0158509	1	-0.0835153	0.674236	-0.0253994	1	0.00284359	1	-0.0246834	1	-0.0325025	1	-1.42891e-06	1	0.02082	1	0.0190252	1	-0.119982	1	-0.0229807	-0.0225282	0.999943	1	FALSE
4933434E20Rik	0.00805752	1	0.0780502	1	-0.187398	1	-0.129328	1	-0.0556318	1	-0.0880345	1	-0.121778	1	-0.0649382	1	-0.0042965	1	-0.02283	1	-0.05725	-0.0603754	1	1	FALSE
5031425E22Rik	0.0596848	1	0.0783578	1	0.00723541	1	-0.200399	1	-0.0609902	1	0.142524	1	0.00756103	1	0.189126	1	0.105089	1	-0.0432157	1	-0.0232223	0.080217	1	1	FALSE
5031439G07Rik	-0.00105899	1	0.0964713	1	-0.00714319	1	0.00903983	1	0.000187718	1	0.0264076	1	-0.0191265	1	-0.0452174	1	-0.133837	1	-0.00666539	1	0.0194993	-0.0356877	1	1	FALSE
5033406O09Rik	0.0153549	1	-0.0144412	1	0.0909053	1	0.0525495	1	-0.0207848	1	0.0588514	1	-0.00644904	1	-2.43358e-05	1	0.0325828	1	0.0391345	1	0.0247168	0.0248191	1	1	FALSE
5033430I15Rik	-0.0280115	0.00543008	-0.00833242	1	-0.0161863	1	-0.0094359	1	-0.0464939	2.31567e-10	-0.0121634	1	0.0234827	1	0.0018465	1	-0.0917056	1	0.00760731	1	-0.021692	-0.0141865	3.43589e-08	1	FALSE
5430416N02Rik	0.0742281	1	-0.171409	1	0.0156291	1	-0.10407	1	-0.060555	1	0.0420128	1	-0.0927618	1	-0.0527086	1	0.114855	1	0.0767945	1	-0.0492354	0.0176383	1	1	FALSE
5730455P16Rik	0.0609495	1	0.0425134	1	-0.0165647	1	-0.0707172	1	0.00518403	1	0.0497422	1	0.024673	1	0.034698	1	-0.0380778	1	0.00752749	1	0.004273	0.0157126	1	1	FALSE
5730480H06Rik	-0.0192176	1	-0.064758	1	-0.0572599	1	-0.073352	1	-0.0295707	1	-0.0254969	1	0.0337243	1	-0.0348259	1	0.00810044	1	0.0373537	1	-0.0488316	0.00377113	1	1	FALSE
5730559C18Rik	-0.15267	7.36611e-15	-0.071316	1	-0.122187	1	-0.0723156	1	-0.188394	1.72553e-34	-0.140337	1.70037e-05	-0.110373	1	0.0168439	1	-0.302572	1	-0.272664	0.0223641	-0.121376	-0.161821	8.1264e-42	0.00100887	FALSE
5930430L01Rik	-0.00658951	1	0.00385443	1	-0.025869	1	-0.0964817	1	-0.00356362	1	0.019665	1	-0.00325168	1	-0.0194171	1	0.0687439	1	0.0054144	1	-0.0257299	0.0142309	1	1	FALSE
6030458C11Rik	-0.0233497	1	-0.0125291	1	-0.0933954	1	-0.0344256	1	-0.0455456	1	0.00380472	1	-0.0158986	1	0.114301	1	0.149131	1	-0.0276464	1	-0.0418491	0.0447384	1	1	FALSE
6330562C20Rik	-0.00235028	1	-0.00178133	1	0.0212978	1	0.128528	1	-0.00868976	1	0.0063535	1	-0.0129656	1	0.0288376	1	0.0328437	1	0.000465524	1	0.0274008	0.011107	1	1	FALSE
6430548M08Rik	0.0385539	1	0.00747544	1	0.0113677	1	0.0393265	1	0.0534143	0.000821777	0.0261349	1	0.00994567	1	0.00948403	1	0.0131524	1	0.0273571	1	0.0300276	0.0172148	0.16371	1	FALSE
8030462N17Rik	-0.013164	1	-0.0186623	1	0.0969405	1	-0.0117515	1	-0.00623547	1	0.0148046	1	0.0428497	1	-0.0088087	1	-0.0223225	1	0.00696763	1	0.00942544	0.00669814	1	1	FALSE
9030025P20Rik	0.0102798	1	0.0207594	1	-0.00688371	1	-0.000908445	1	0.00149406	1	0.0226711	1	-0.0443068	1	0.0488872	1	0.0369779	1	0.00469542	1	0.00494822	0.013785	1	1	FALSE
9030624J02Rik	0.0152259	1	0.00800161	1	0.00108748	1	0.167088	1	-0.00552128	1	-0.0661368	1	-0.0467202	1	0.0210745	1	-0.268108	1	-0.00817906	1	0.0371764	-0.0736139	1	1	FALSE
9130008F23Rik	-0.00874567	1	-0.0452926	1	-0.00492522	1	-0.0547872	1	-0.00770879	1	-0.00423295	0.102969	-0.0225814	1	0.0500825	1	-0.0421803	1	-0.0228109	1	-0.0242919	-0.00834462	1	0.919337	FALSE
9130401M01Rik	-0.0569095	1	-0.177676	1	-0.223097	1	-0.0582366	1	-0.0219147	1	-0.0158815	1	-0.0978623	1	0.191451	1	-0.023155	1	-0.0588057	1	-0.107567	-0.000850734	1	1	FALSE
9230102O04Rik	0.0566177	1	0.00940018	1	0.0502973	1	0.0227129	1	0.0123841	1	0.0335602	1	-0.0012042	1	0.0122838	1	0.0657711	1	0.049814	1	0.0302824	0.032045	1	1	FALSE
9430015G10Rik	0.00784273	1	-0.0189747	1	-0.0705258	1	0.0405605	1	-0.0163517	1	-0.01138	1	-0.00254503	1	0.0350473	1	0.0307344	1	0.0217771	1	-0.0114898	0.0147268	1	1	FALSE
9430038I01Rik	0.0289167	1	-0.0265081	1	0.0202234	1	0.0674692	1	-0.0211001	1	0.0129947	1	0.0132631	1	0.00598167	1	0.121025	1	0.00557529	1	0.0138002	0.0317679	1	1	FALSE
9530068E07Rik	0.0135727	1	-0.0363711	1	0.138645	1	0.0834975	1	-0.00989952	1	0.0297285	1	0.0767885	1	0.0101604	1	-0.244833	1	0.0891074	1	0.037889	-0.00780961	1	1	FALSE
9530077C05Rik	0.0291441	1	-0.0366265	1	0.0133205	1	-0.0256894	1	0.0382971	1	0.0324134	1	0.0267073	1	0.0397154	1	0.0650998	1	0.00265959	1	0.00368919	0.0333191	1	1	FALSE
9530082P21Rik	-0.0342125	1	-0.0983531	0.0584531	-0.0467977	1	-0.0364185	1	-0.0606364	0.00394281	0.0297945	1	-0.0501949	1	-0.0511093	1	0.0215408	1	-0.0140823	1	-0.0552836	-0.0128102	0.0800636	1	FALSE
9930021J03Rik	-0.0713356	1	0.00461925	1	0.00547668	1	-0.112045	1	-0.0765841	1	-0.0335015	1	-0.195003	1	-0.0350871	1	0.0760145	1	-0.0160109	1	-0.0499737	-0.0407177	1	1	FALSE
9930111J21Rik2	-0.163646	3.42789e-24	-0.124941	0.0387092	-0.24418	0.0440267	-0.240905	1	-0.144287	5.16852e-40	-0.0925088	2.01438e-10	-0.0986404	0.40567	-0.0954222	1	-0.0165668	1	-0.0275911	1	-0.183592	-0.0661459	6.69365e-59	1.18584e-06	FALSE
A130010J15Rik	0.0208709	1	0.062807	1	-0.0467149	1	0.0172528	1	-0.00840919	1	-0.00260508	1	-0.000746561	1	0.00575925	1	0.0110561	1	0.0357395	1	0.00916131	0.00984065	1	1	FALSE
A130051J06Rik	0.0566245	1	-0.0046168	1	0.0139624	1	0.0550069	1	0.0973012	0.21052	0.0357294	1	0.0685017	1	0.0459789	1	-0.0480302	1	-0.0573861	1	0.0436556	0.00895874	0.978552	1	FALSE
A230050P20Rik	-0.0660331	0.617087	-0.0814303	1	-0.151662	1	0.045284	1	-0.0492397	1	-0.188177	1	-0.0492836	1	-0.0698297	1	-0.0135611	1	0.0294358	1	-0.0606161	-0.0582832	0.999854	1	FALSE
A330069E16Rik	0.0160738	1	-0.0464577	1	-0.0496358	1	-0.0485686	1	0.00936684	1	0.0325796	1	-0.07218	1	0.0406223	1	0.0610417	1	-0.0499968	1	-0.0238443	0.00241337	1	1	FALSE
A430005L14Rik	-0.0436659	1	-0.057266	1	0.032995	1	-0.0255815	1	-0.0108247	1	0.0561594	1	0.0403448	1	0.260105	1	0.231072	1	0.107005	1	-0.0208686	0.138937	1	1	FALSE
A630089N07Rik	0.00473675	1	-0.0461695	1	-0.0318666	1	0.0399758	1	-0.0157273	1	-0.0201336	1	-0.037614	1	-0.0510923	1	-0.0087245	1	0.0130464	1	-0.00981015	-0.0209036	1	1	FALSE
A830082K12Rik	-0.000772899	1	0.0334989	1	-0.00893941	1	0.133856	1	-0.0316725	1	0.019668	1	0.00674683	1	0.0561073	1	0.0579923	1	-0.015469	1	0.0251941	0.0250091	1	1	FALSE
A930004D18Rik	-0.0231013	1	-0.0181359	1	0.0333634	1	-0.0201028	1	-0.0154014	1	-0.000349913	1	-0.000324829	1	-0.0203828	1	-0.0637458	1	-0.00792769	1	-0.0086756	-0.0185462	1	1	FALSE
A930015D03Rik	-0.0262086	1	-0.0377862	1	-0.00824843	1	0.0699008	1	-0.0344718	1	-0.0176561	1	-0.0442554	1	-0.187933	1	-0.0173169	1	-0.10889	1	-0.00736286	-0.0752103	1	1	FALSE
AA467197	-0.407944	2.47308e-13	-0.459578	0.0081057	-0.329536	1	-0.522994	1	-0.585692	2.10487e-46	-0.623354	0.519056	-0.315902	1	-0.173135	1	-0.666929	1	-0.563595	0.46326	-0.461149	-0.468583	6.75945e-54	0.984728	FALSE
Aaas	-0.02045	1	-0.010139	1	-0.0257041	1	0.00912547	1	0.00326702	1	-0.00248766	1	-0.168676	1	-0.0133822	1	-0.0373904	1	-0.0464947	1	-0.00878011	-0.0536862	1	1	FALSE
Aacs	0.00846503	1	-0.0254284	1	0.0551166	1	0.188477	1	0.0266827	1	0.00363082	1	-0.075537	1	-0.1006	1	0.0177881	1	0.041235	1	0.0506627	-0.0226967	1	1	FALSE
Aaed1	-0.0508925	1	0.0141297	1	-0.0789724	1	0.030896	1	-0.131514	9.35746e-07	0.0691333	1	0.161591	1	0.0243321	1	-0.20477	1	-0.0570077	1	-0.0432706	-0.00134423	0.00196922	1	FALSE
Aagab	-0.012443	1	0.0218833	1	-0.00211703	1	0.00381302	1	-0.0249127	1	-0.0122608	1	-0.0158808	1	-0.0239338	1	0.0397071	1	0.00753353	1	-0.00275529	-0.000966968	1	1	FALSE
Aak1	-0.00312278	1	0.0245241	1	-0.076493	1	-0.092055	1	-0.0269233	1	-0.0304816	1	-0.0444631	1	-0.0793357	1	-0.12111	1	-0.0262382	1	-0.034814	-0.0603258	1	1	FALSE
Aamdc	0.0236023	1	0.0945558	1	0.122909	1	0.000549378	1	0.00504002	1	0.0825618	1	0.0125785	1	-0.0588903	1	-0.0619198	1	0.062903	1	0.0493313	0.00744664	1	1	FALSE
Aamp	-0.0160343	1	0.214462	1	-0.0802419	1	-0.0133148	1	-0.0268609	1	-0.184339	1	0.0247454	1	-0.0845375	1	-0.260256	1	-0.0741732	1	0.0156021	-0.115712	1	1	FALSE
Aar2	-0.0098174	1	-0.0199459	1	-0.0732915	1	0.0446662	1	-0.02894	1	0.013025	1	-0.0156137	1	0.0526716	1	0.0216804	1	0.0379565	1	-0.0174657	0.021944	1	1	FALSE
Aars	0.0379555	1	-0.101177	1	-0.0978756	1	-0.158837	1	0.0286024	1	0.0316863	1	-0.0150149	1	-0.135529	1	-0.122175	1	0.0456796	1	-0.0582663	-0.0390706	1	1	FALSE
Aars2	-0.00462326	1	-0.0286376	1	-0.0525999	1	-0.0211352	1	-0.0131584	1	0.00401819	1	-0.0365426	1	0.0167749	1	-0.0411944	1	-0.00920288	1	-0.0240309	-0.0132294	1	1	FALSE
Aasdh	0.0106237	1	-0.015209	1	0.0173357	1	0.0365288	1	-0.0171153	1	-0.002685	1	-0.020095	1	0.0163434	1	0.0156818	1	-0.0104499	1	0.00643277	-0.000240941	1	1	FALSE
Aasdhppt	-0.0530497	1	-0.0527849	1	0.00547954	1	-0.0805056	1	0.0195594	1	-0.0343582	1	0.0102288	1	-0.188134	1	-0.0979408	1	-0.120779	1	-0.0322602	-0.0861967	1	1	FALSE
Aatf	0.0135002	1	-0.0850522	1	-0.225041	1	-0.0765391	1	-0.00711803	1	-0.0112909	1	-0.167734	1	-0.105458	1	0.106651	1	-0.0554441	1	-0.0760501	-0.0466552	1	1	FALSE
Aatk	0.0358672	1	0.0555612	1	0.0693927	1	0.0876121	1	0.0192554	1	0.028504	1	0.000928694	1	-0.0182273	1	0.0101406	1	0.105446	1	0.0535377	0.0253585	1	1	FALSE
Abca2	0.0269065	1	-0.0013673	1	-0.00927737	1	0.0384538	1	0.0152116	1	0.0220666	1	0.0194853	1	-0.0122196	1	-0.0743942	1	0.0542656	1	0.0139854	0.00184075	1	1	FALSE
Abca3	0.0828598	1	0.0146731	1	0.0530827	1	0.0671269	1	0.0845677	1	0.0496201	1	-0.00795287	1	0.0543553	1	0.157424	1	0.09973	1	0.0604621	0.0706352	1	1	FALSE
Abca7	0.0870084	1	0.0250102	1	0.027503	1	0.0131931	1	0.0691511	0.0253257	0.0401524	1	0.00450915	1	0.00511947	1	0.005765	1	0.0108669	1	0.0443732	0.0132826	0.691861	1	FALSE
Abcb10	0.003727	1	-0.0670422	0.371769	0.0363616	1	0.0010855	1	0.0232603	1	0.0013205	1	0.011599	1	0.0132225	1	0.0829171	1	0.00602706	1	-0.000521547	0.0230172	0.996499	1	FALSE
Abcb1b	0.107178	1	-0.0214238	1	0.155323	1	0.061163	1	0.151343	0.0181036	-0.260371	1	-0.123853	1	-0.0539468	1	-0.0826864	1	-0.19052	1	0.0907169	-0.142276	0.626562	1	FALSE
Abcb7	-0.00252765	1	-0.0341687	1	-0.0920198	1	-0.0693524	1	-0.0248232	1	0.0062438	1	-0.0512164	1	-0.0402884	1	0.0680351	1	0.0333312	1	-0.0445784	0.00322106	1	1	FALSE
Abcb8	-0.031632	1	-0.00628895	1	0.0230303	1	-0.0370839	1	-0.0237437	1	-0.00804916	1	-0.0933349	1	-0.00433845	1	-0.133035	1	-0.0101368	1	-0.0151436	-0.0497788	1	1	FALSE
Abcc1	0.0598961	1	0.00835392	1	-0.141822	1	0.105731	1	0.0934109	1	-0.1887	1	-0.0141836	1	0.0225897	1	0.0457849	1	0.000347408	1	0.025114	-0.0268323	1	1	FALSE
Abcc3	-0.101679	1	-0.0915342	1	0.207947	1	-0.252928	1	-0.273356	1.41005e-17	0.0136167	1	-0.0170497	1	0.0862211	1	-0.0162669	1	0.0989283	1	-0.10231	0.0330899	1.48002e-12	1	FALSE
Abcc5	-0.00813525	1	-0.0117332	1	-0.00442095	1	-0.0251466	1	-0.0137925	1	0.00699176	1	-0.00737577	1	-0.0132729	1	-0.00614679	1	0.0390988	1	-0.0126457	0.00385902	1	1	FALSE
Abcd1	0.0023257	1	-0.00195679	1	-0.027043	1	0.00912555	1	-0.0117388	1	0.0162817	1	0.0176546	1	0.0129789	1	-8.9697e-05	1	-0.0185182	1	-0.00585745	0.00566146	1	1	FALSE
Abcd3	0.0337731	1	-0.0392515	1	-0.0248894	1	-0.0383677	1	-0.00133061	1	-0.198625	1	-0.10582	1	-0.113456	1	-0.0454707	1	-0.0738583	1	-0.0140132	-0.107446	1	1	FALSE
Abcd4	-0.0219479	1	-0.0453039	1	-0.0135081	1	0.0738734	1	-0.0249224	1	-0.0181123	1	-0.0521116	1	0.00625929	1	0.023384	1	0.0116785	1	-0.00636178	-0.00578044	1	1	FALSE
Abce1	-0.0157764	1	-0.273711	0.0393198	-0.325805	1	-0.269156	1	0.0289893	1	-0.0500929	1	-0.139678	1	-0.0490697	1	0.127668	1	-0.0259673	1	-0.171092	-0.0274279	0.774168	1	FALSE
Abcf1	0.0602092	1	0.00666294	1	-0.0642977	1	0.132283	1	0.0564356	1	-0.029102	1	-0.131617	1	-0.0280133	1	0.0672405	1	-0.251576	1	0.0382585	-0.0746136	1	1	FALSE
Abcf2	-0.136575	0.0223028	-0.128298	1	-0.0562446	1	-0.10621	1	-0.03436	1	-0.0550568	1	-0.082358	1	-0.0936429	1	-0.210633	1	0.000368537	1	-0.0923375	-0.0882643	0.667252	1	FALSE
Abcf3	-0.0130354	1	-0.00325042	1	0.0531172	1	-0.106928	1	-0.0314451	1	0.0122027	1	-0.00994768	1	-0.04347	1	-0.0344587	1	0.00866253	1	-0.0203084	-0.0134022	1	1	FALSE
Abcg2	0.0583745	1	0.133221	1	-0.0172768	1	0.123801	1	0.28726	2.44648e-21	0.0399846	1	0.0217349	1	0.0933732	1	0.0980968	1	0.00431915	1	0.117076	0.0515017	5.63625e-16	1	FALSE
Abhd10	-0.0141177	1	-0.00500268	1	0.0301233	1	0.0384828	1	-0.00174051	1	0.0299934	1	0.0851375	1	0.0391001	1	-0.0700403	1	-0.0119935	1	0.00954904	0.0144394	1	1	FALSE
Abhd11	0.0144094	1	-0.0852695	1	-0.038508	1	-0.105531	1	-0.0194571	1	-0.0522767	1	-0.0571895	1	-0.0282001	1	0.085325	1	-0.0600839	1	-0.0468713	-0.0224851	1	1	FALSE
Abhd12	-0.0763793	0.206139	0.0386045	1	-0.107575	1	-0.0340747	1	-0.0771733	1.57093e-07	0.0433124	1	0.0384943	1	-0.00228777	1	-0.0585393	1	-0.027578	1	-0.0513196	-0.00131966	0.000152439	1	FALSE
Abhd13	-0.0155257	1	-0.0262926	1	-0.0145762	1	-0.0454056	1	0.00568929	1	0.010689	1	-0.0100427	1	-0.130556	1	-0.00816912	1	-0.0254444	1	-0.0192222	-0.0327046	1	1	FALSE
Abhd14a	0.0373501	1	0.0677147	1	-0.0278751	1	0.0711037	1	0.0776493	1	0.0872751	1	0.0081028	1	0.0412011	1	-0.147658	1	0.207387	1	0.0451885	0.0392616	1	1	FALSE
Abhd14b	0.0347183	1	0.0321093	1	-0.00598643	1	-0.0270491	1	-0.00419664	1	0.0303269	1	0.0336437	1	0.0583681	1	-0.0746904	1	0.0144144	1	0.00591908	0.0124125	1	1	FALSE
Abhd16a	0.020817	1	-0.0642119	1	-0.0936647	1	0.128121	1	-0.0166681	1	0.0549222	1	-0.0640609	1	-0.346029	1	-0.0290136	1	-0.0812663	1	-0.00512136	-0.0930895	1	1	FALSE
Abhd17a	0.0339378	1	0.083758	1	0.155649	1	-0.245042	1	0.0485244	1	0.0638584	1	0.114221	1	0.0443646	1	-0.0225275	1	0.228661	1	0.0153655	0.0857155	1	1	FALSE
Abhd17b	-0.0215596	1	-0.0349588	1	-0.07924	1	0.0255697	1	-0.00586336	1	-0.03994	1	-0.0331985	1	-0.207982	1	-0.0991173	1	-0.0423483	1	-0.0232104	-0.0845173	1	1	FALSE
Abhd17c	-0.0528446	0.560481	-0.0544226	1	-0.0784677	1	-0.0510716	1	-0.0884574	2.59477e-16	-0.0830908	1	-0.086012	1	-0.13946	1	0.0720196	1	-0.0622624	1	-0.0650528	-0.0597612	1.19938e-11	1	FALSE
Abhd18	0.0294959	1	0.0536744	1	0.0180775	1	-0.0255417	1	-0.00845152	1	0.00244263	1	0.000346348	1	0.0327974	1	0.0455062	1	-0.00547957	1	0.0134509	0.0151226	1	1	FALSE
Abhd2	0.118536	1	0.471414	0.0641374	-0.149327	1	0.0698709	1	-0.0486499	1	-0.131435	1	-0.653461	1	-0.987121	1	-0.524161	1	-0.752848	1	0.0923688	-0.609805	0.855877	1	FALSE
Abhd4	0.00269357	1	0.0188029	1	0.00446091	1	-0.00759536	1	0.0278449	1	0.0220971	1	0.0148126	1	-0.0637328	1	0.0345323	1	-0.0286676	1	0.00924139	-0.00419166	1	1	FALSE
Abhd5	-0.0405296	1	0.00531416	1	0.00614063	1	0.24634	1	-0.0537106	1	-0.00354215	1	-0.101962	1	0.0134269	1	-0.10588	1	-0.0110827	1	0.0327109	-0.041808	1	1	FALSE
Abhd6	-0.00707776	1	0.024745	1	-0.0587764	1	0.0901638	1	0.00749072	1	-0.00607973	1	0.0225533	1	-0.0573469	1	-0.0217273	1	-0.0208479	1	0.0113091	-0.0166897	1	1	FALSE
Abhd8	0.0802256	1	0.105082	1	0.0509197	1	0.0895983	1	0.0627158	1	0.087517	1	-0.0416407	1	0.224107	1	-0.161207	1	0.0116084	1	0.0777082	0.0240769	1	1	FALSE
Abi1	0.0277035	1	-0.0307071	1	0.0903037	1	-0.0203717	1	-0.0301418	1	-0.0842081	1	0.00834684	1	-0.110977	1	-0.23361	1	-0.0135756	1	0.00735732	-0.0868047	1	1	FALSE
Abi2	-0.00741573	1	0.0321223	1	0.0424837	1	0.127026	1	-0.0311008	1	-0.230509	1	0.0246788	1	0.0729692	1	-0.00289574	1	-0.0596657	1	0.0326231	-0.0390844	1	1	FALSE
Abl1	0.0431645	1	-0.0647074	1	0.00438593	1	0.203399	1	-0.055688	1	0.0631629	1	0.027253	1	-0.0184372	1	0.12118	1	-0.00966567	1	0.0261108	0.0366986	1	1	FALSE
Abl2	-0.0351392	1	-0.105839	1	-0.186375	1	-0.11083	1	-0.0396896	1	-0.028773	1	-0.0578581	1	-0.204149	1	-0.114756	1	-0.0187882	1	-0.0955745	-0.0848648	1	1	FALSE
Ablim1	0.0399712	1	0.145723	1	-0.0344004	1	-0.087273	1	0.104104	1	-0.0210308	1	-0.0520726	1	-0.123882	1	0.0876866	1	0.058287	1	0.0336249	-0.0102024	1	1	FALSE
Abr	-0.0213535	1	-0.0448541	1	-0.184369	0.0557596	-0.0578397	1	-0.0226557	1	-0.00623014	1	-0.00657222	1	-0.0191266	1	0.00869747	1	-0.00885079	1	-0.0662144	-0.00641645	0.833927	1	FALSE
Abracl	-0.405758	2.97504e-22	-0.270627	0.0468825	-0.312612	1	-0.0632236	1	-0.449181	1.69595e-42	-0.314584	0.0611763	-0.131112	1	0.0536849	1	-0.396635	1	-0.256936	1	-0.30028	-0.209116	4.96537e-58	0.84861	FALSE
Abraxas1	-0.00940406	1	-0.0458864	1	0.00965836	1	0.0412956	1	-0.00548806	1	0.010823	1	0.0505496	1	-0.016595	1	0.0226717	1	0.0505915	1	-0.00196491	0.0236082	1	1	FALSE
Abraxas2	0.009306	1	-0.00407457	1	-0.0097889	1	-0.0747038	1	0.010299	1	0.063305	1	-0.0913693	1	0.0509438	1	0.131216	1	-0.0620064	1	-0.0137924	0.0184178	1	1	FALSE
Abt1	-0.0191869	1	-0.0620125	1	-0.113483	1	0.0295253	1	0.000164406	1	-0.0209688	1	0.0201498	1	-0.0482902	1	-0.0377168	1	-0.00560944	1	-0.0329985	-0.0184871	1	1	FALSE
Abtb1	0.000285918	1	0.00291767	1	0.00931337	1	0.0390945	1	0.010385	1	0.0253928	1	0.00808313	1	0.029828	1	0.0458455	1	-0.0135014	1	0.0123993	0.0191296	1	1	FALSE
Abtb2	0.0370065	1	0.0290043	1	-0.0249007	1	-0.0238053	1	0.029684	1	0.0219097	1	0.0183958	1	0.00577052	1	-0.0226337	1	-0.00990711	1	0.00939775	0.00270703	1	1	FALSE
AC127341.3	-0.122999	0.00212713	-0.1349	1	-0.177292	1	-0.0818818	1	-0.113769	0.000527867	0.00339152	1	-0.111873	1	-0.0487147	1	-0.0274132	1	-0.067261	1	-0.126168	-0.0503741	0.00225099	1	FALSE
AC149090.1	0.1319	1	-0.0915224	1	-0.0114385	1	0.0243947	1	0.0163028	1	-0.107662	1	-0.179865	1	0.0315552	1	-0.168003	1	-0.0448498	1	0.0139273	-0.0937649	1	1	FALSE
AC160336.1	0.587281	1	-0.93238	1	0.828352	1	-0.556737	1	0.274583	1.71481e-09	-1.447	1.3293e-08	-1.46308	5.90108e-06	-1.03009	1	-1.15892	1	-1.44974	0.285831	0.0402198	-1.30976	1.45943e-05	1.03932e-09	FALSE
AC165953.2	0.0168038	1	-0.0627864	1	-0.0599433	1	0.0176867	1	0.0108494	1	0.00457606	1	-0.141164	1	-0.00848101	1	0.0494097	1	-0.0245529	1	-0.015478	-0.0240423	1	1	FALSE
Acaa1a	-0.0567438	1	0.00530145	1	-0.000916496	1	-0.0045416	1	-0.111247	2.78456e-05	-0.137184	1	-0.179625	1	-0.386401	1	-0.215418	1	-0.165269	1	-0.0336295	-0.21678	0.0212498	1	FALSE
Acaa1b	-0.0223491	1	-0.0835224	0.0265107	-0.0459274	1	-0.00215567	1	-0.0613597	0.000543376	-0.020922	1	-0.130696	1	-0.169732	1	-0.127946	1	-0.0216801	1	-0.0430628	-0.0941951	0.0136665	1	FALSE
Acaa2	0.0265462	1	0.0871612	1	-0.0680514	1	0.164746	1	0.185817	0.0509435	-0.0661598	1	-0.00500034	1	0.13914	1	-0.0351326	1	0.124645	1	0.0792438	0.0314984	0.819107	1	FALSE
Acaca	0.00642837	1	-0.10694	1	-0.0297209	1	0.0354685	1	0.00259541	1	-0.243874	1	-0.0668503	1	-0.0875243	1	0.0162435	1	0.0170008	1	-0.0184337	-0.0730009	1	1	FALSE
Acad8	0.00395719	1	-0.00438358	1	-0.0340364	1	-0.0118335	1	-0.0256611	1	-0.00432684	1	-0.0223533	1	-0.0611333	1	-0.0123762	1	0.00463976	1	-0.0143915	-0.01911	1	1	FALSE
Acad9	-0.00493497	1	0.0223833	1	0.0514721	1	0.010169	1	-0.0336936	1	-0.0168515	1	-0.00270606	1	-0.00239433	1	-0.00358683	1	-0.0814992	1	0.00907917	-0.0214076	1	1	FALSE
Acadl	-0.306519	1.87249e-07	-0.0832584	1	-0.332793	1	-0.149655	1	-0.365297	1.14045e-23	-0.265653	1	-0.30716	1	-0.0985648	1	0.0604887	1	0.038419	1	-0.247505	-0.114494	2.05704e-24	1	FALSE
Acadm	0.130439	1	0.252171	1	-0.0402502	1	0.158614	1	0.0964544	1	0.0785423	1	0.0678958	1	0.0517541	1	0.281038	1	0.167864	1	0.119486	0.129419	1	1	FALSE
Acads	0.0944259	1	0.124916	1	0.116086	1	0.0664172	1	0.0413371	1	0.014314	1	0.107132	1	0.0134667	1	0.174091	1	-0.116185	1	0.0886364	0.0385639	1	1	FALSE
Acadsb	-0.0939293	1	-0.0253904	1	-0.0305371	1	0.2796	1	-0.0815895	7.95062e-06	0.0791972	1	-0.0579862	1	0.375829	1	0.140987	1	0.0522423	1	0.00963066	0.118054	0.00909273	1	FALSE
Acadvl	-0.0225142	1	0.149862	1	-0.0760367	1	0.149894	1	-0.0278508	1	-0.0631134	1	-0.0259405	1	0.0358825	1	-0.0853905	1	-0.0285548	1	0.0346707	-0.0334233	1	1	FALSE
Acap1	-0.0289248	1	-0.190764	0.250943	-0.0141599	1	-0.0585844	1	0.024297	1	-0.0329652	1	-0.08921	1	-0.0527756	1	-0.111176	1	-0.153634	1	-0.0536272	-0.0879523	0.986425	1	FALSE
Acap2	0.0816499	1	0.0234816	1	-0.107512	1	-0.0404612	1	0.0825119	1	-0.0122694	1	0.0517383	1	0.0785366	1	0.384286	1	0.0904406	1	0.007934	0.118546	1	1	FALSE
Acap3	0.0180632	1	-0.00885055	1	0.0342467	1	0.0641119	1	-0.00646056	1	-0.0909071	1	0.0137817	1	-0.0554132	1	-0.122913	1	0.000493046	1	0.0202221	-0.0509917	1	1	FALSE
Acat1	-0.0252955	1	-0.00472204	1	-0.183623	1	0.158247	1	-0.100397	0.0104463	-0.0028454	1	0.0795902	1	0.163334	1	0.221938	1	0.199049	1	-0.0311579	0.132213	0.520471	1	FALSE
Acat2	-0.0540921	1	-0.0504046	1	-0.0820827	1	0.0749884	1	-0.00480794	1	-0.0963944	1	-0.0911417	1	-0.143313	1	-0.163667	1	0.0534543	1	-0.0232798	-0.0882123	1	1	FALSE
Acbd3	-0.0611392	1	-0.0789752	1	-0.151655	1	0.124465	1	-0.176027	2.79634e-07	0.019242	1	-0.0327325	1	0.112593	1	-0.000394979	1	-0.14225	1	-0.0686663	-0.00870856	0.000800574	1	FALSE
Acbd4	0.0348881	1	0.0750295	1	-0.0270649	1	0.142806	1	0.0331198	1	0.0312289	1	0.0333517	1	0.0654706	1	0.0274397	1	-0.258854	1	0.0517556	-0.0202727	1	1	FALSE
Acbd5	0.0566329	1	-0.0152466	1	0.0248058	1	-0.0117266	1	0.0228254	1	0.0997748	1	0.0910255	1	-0.0368251	1	0.0314885	1	0.0318233	1	0.0154582	0.0434574	1	1	FALSE
Acbd6	-0.135216	0.00239224	0.0663143	1	-0.204186	1	0.104664	1	-0.0778705	0.186161	-0.041387	1	-0.00691617	1	-0.0184227	1	-0.12403	1	-0.361973	1	-0.0492589	-0.110546	0.117044	1	FALSE
Accs	-0.0174548	1	-0.00233701	1	-0.0116037	1	0.178107	1	-0.00582837	1	-0.00388174	1	-0.0199731	1	-0.0221042	1	0.00544125	1	0.0386285	1	0.0281766	-0.000377863	1	1	FALSE
Acd	0.00581635	1	-0.0552693	1	0.10277	1	0.0496294	1	-0.0124608	1	-0.0111082	1	0.0370401	1	0.0124853	1	-0.0734765	1	0.0600983	1	0.0180971	0.0050078	1	1	FALSE
Ace	0.0855088	1	0.174055	1	0.211967	1	0.230901	1	-0.0606054	1	0.0209981	1	0.0846315	1	0.120532	1	-0.439895	1	-0.203735	1	0.128365	-0.0834935	1	1	FALSE
Acer3	-0.0714388	1	-0.0338263	1	-0.0581957	1	-0.0844962	1	-0.0182223	1	-0.0670745	1	0.0593475	1	-0.0370179	1	0.0862489	1	0.0223729	1	-0.0532359	0.0127754	1	1	FALSE
Acin1	-0.161176	0.78497	-0.144359	1	-0.305764	1	-0.111099	1	-0.0798018	1	0.0131227	1	0.0576721	1	-0.163887	1	0.180658	1	-0.468004	1	-0.16044	-0.0760877	0.999994	1	FALSE
Ackr3	-0.213151	6.87972e-08	-0.034146	1	0.0635141	1	-0.562056	1	-0.363529	2.44923e-34	-0.156515	1	-0.120293	1	-0.226092	1	-0.194491	1	-0.28098	1	-0.221874	-0.195674	5.69453e-35	1	FALSE
Acly	-0.0381063	1	-0.0377883	1	-0.0561088	1	0.0524668	1	0.116792	1	-0.185304	1	-0.190674	1	-0.220553	1	-0.0124864	1	-0.0887441	1	0.00745105	-0.139552	1	1	FALSE
Aco1	-0.0255295	1	-0.0749139	1	-0.213684	0.817474	-0.00877184	1	0.00916261	1	-0.010766	1	-0.00872122	1	-0.0466367	1	0.0802423	1	-0.111755	1	-0.0627474	-0.0195274	0.999998	1	FALSE
Aco2	-0.0510929	1	0.020356	1	0.249289	1	-0.106475	1	-0.00500676	1	0.0273018	1	-0.153716	1	-0.0878527	1	0.00350215	1	-0.0216914	1	0.021414	-0.0464912	1	1	FALSE
Acot13	0.0736643	1	0.0338955	1	0.00811937	1	-0.0694985	1	0.156592	1	0.18199	0.622229	0.0454355	1	-0.00512583	1	0.139858	1	0.25206	1	0.0405545	0.122843	1	0.999865	FALSE
Acot7	-0.119722	1	-0.104214	1	-0.0342547	1	-0.015421	1	-0.0237889	1	-0.0196913	1	-0.0598441	1	0.14701	1	-0.293619	1	-0.0514782	1	-0.0594802	-0.0555245	1	1	FALSE
Acot8	0.026478	1	0.00279994	1	0.084434	1	-0.026816	1	-0.00145883	1	0.063492	1	0.0167914	1	-0.0164358	1	-0.0541736	1	0.0827965	1	0.0170874	0.0184941	1	1	FALSE
Acot9	-0.126343	0.0293069	-0.117459	1	0.0176363	1	-0.119301	1	0.00531925	1	-0.069449	1	-0.0139666	1	-0.0626062	1	-0.128368	1	-0.131955	1	-0.0680294	-0.0812689	0.719782	1	FALSE
Acox1	0.0592253	1	0.103408	1	-0.098451	1	-0.0773161	1	0.0458258	1	0.0427083	1	-0.0369056	1	-0.00836388	1	0.0131505	1	0.0774632	1	0.00653846	0.0176105	1	1	FALSE
Acp1	-0.0259348	1	-0.0587176	1	0.0973759	1	0.0518884	1	-0.0315681	1	-0.0482646	1	-0.0499169	1	0.298519	1	-0.0431102	1	0.0292346	1	0.00660875	0.0372924	1	1	FALSE
Acp2	0.00362917	1	0.00726601	1	0.013462	1	-0.0457984	1	-0.0098727	1	0.0419877	1	-0.0162898	1	0.017507	1	-0.0129743	1	-0.0719356	1	-0.00626279	-0.008341	1	1	FALSE
Acp5	-0.0181849	1	0.0408048	1	0.233963	1	0.0761144	1	-0.0387939	1	-0.103	1	0.162927	1	0.148068	1	-0.126363	1	0.0581938	1	0.0587807	0.0279652	1	1	FALSE
Acp6	-0.0257744	1	-0.00836543	1	-0.0425119	1	0.0833804	1	-0.0547818	0.735168	-0.0137256	1	0.0047979	1	-0.018295	1	0.082504	1	-0.0222821	1	-0.00961063	0.00659986	0.999982	1	FALSE
Acsbg1	-0.265588	2.54448e-21	-0.12217	0.440208	-0.252468	1	-0.203438	1	-0.188694	1.259e-11	-0.341186	4.36457e-09	-0.212844	1	-0.0821933	1	-0.49887	1	-0.289474	0.1189	-0.206472	-0.284913	1.79647e-26	5.49268e-06	TRUE
Acsf3	0.0228074	1	-0.00606546	1	-0.0115286	1	-0.00320541	1	0.000616322	1	-0.00734716	1	0.0133921	1	0.0313681	1	0.04619	1	0.0155579	1	0.000524854	0.0198322	1	1	FALSE
Acsl1	0.05584	1	0.00676629	1	-0.0227785	1	0.0471175	1	0.0330804	1	0.0326472	1	0.100095	1	0.0802381	1	0.0205143	1	0.119822	1	0.0240051	0.0706633	1	1	FALSE
Acsl3	-0.0179281	1	0.249104	1	-0.103461	1	0.0767328	1	0.0290995	1	-0.127805	1	-0.00111848	1	-0.13289	1	-0.111065	1	0.142247	1	0.0467094	-0.0461264	1	1	FALSE
Acsl4	-0.261294	0.0078785	-0.143954	1	-0.279093	1	0.131409	1	-0.26103	3.36775e-06	-0.49521	0.625252	-0.381817	1	-0.425344	1	-0.684028	1	-0.696116	1	-0.162792	-0.536503	0.00013039	0.999871	FALSE
Acsl5	-0.127784	0.132015	-0.226717	1	0.0338509	1	-0.105089	1	-0.0310311	1	0.0137593	1	-0.0644624	1	-0.26097	1	0.0876166	1	0.124215	1	-0.0913543	-0.0199682	0.945078	1	FALSE
Acss2	0.0447415	1	-0.0311134	1	0.0303207	1	0.00677471	1	0.0107691	1	0.0115965	1	-0.0720115	1	-0.0388968	1	0.0174043	1	0.020854	1	0.0122985	-0.0122107	1	1	FALSE
Actb	-0.325132	6.75603e-10	0.144019	1	-0.0148488	1	0.159871	1	-0.347495	2.5269e-19	-0.349606	0.236447	-0.486532	0.00957476	-0.332477	1	-0.845135	1	-0.63181	0.0337614	-0.0767171	-0.529112	1.26672e-22	0.040797	FALSE
Actg1	-0.605005	1.03285e-17	-0.406623	0.0123346	-0.0687814	1	-0.254706	1	-0.317436	1.722e-10	-0.25435	0.994773	-0.149244	1	-0.288741	1	-0.307778	1	-0.394647	1	-0.33051	-0.278952	1.84331e-23	1	FALSE
Actl6a	-0.0756712	1	-0.194022	0.182175	-0.167261	1	-0.0435183	1	-0.0587299	1	-0.100323	1	-0.177959	1	-0.0739554	1	-0.0180249	1	-0.030933	1	-0.10784	-0.0802391	0.970208	1	FALSE
Actn1	-0.016917	1	-0.0804494	1	-0.132111	1	-0.161499	1	-0.0176212	1	-0.226465	1	-0.276991	1	-0.433696	1	-0.0477314	1	-0.361072	1	-0.0817195	-0.269191	1	1	FALSE
Actn4	0.019729	1	0.00140148	1	0.0836764	1	-0.0631599	1	0.0241672	1	-0.231786	1	-0.0637238	1	-0.168401	1	-0.121682	1	-0.186889	1	0.0131629	-0.154497	1	1	FALSE
Actr10	-0.0472586	1	-0.012941	1	-0.0292342	1	0.0658609	1	-0.0911124	0.150918	-0.146595	1	0.0512756	1	-0.0782141	1	-0.0740831	1	0.0342929	1	-0.0229371	-0.0426647	0.956645	1	FALSE
Actr1a	-0.0600806	1	-0.0784681	1	-0.0210557	1	-0.0595066	1	-0.0747221	0.0223113	-0.0527818	1	0.0118324	1	-0.108999	1	-0.0122788	1	0.0189222	1	-0.0587666	-0.028661	0.667326	1	FALSE
Actr1b	-0.0225068	1	-0.131642	1	-0.0152417	1	-0.0431084	1	-0.0423688	1	-0.129606	1	-0.115222	1	-0.098609	1	0.0576689	1	-0.000647334	1	-0.0509736	-0.0572831	1	1	FALSE
Actr2	-0.0217843	1	-0.173744	1	-0.261327	1	-0.198698	1	0.0127184	1	-0.165887	1	-0.276202	1	-0.156422	1	-0.260472	1	-0.176424	1	-0.128567	-0.207081	1	1	FALSE
Actr3	-0.0679105	1	-0.0966919	1	-0.0699883	1	-0.0249346	1	-0.0799904	1	-0.380124	1	-0.061758	1	-0.30969	1	-0.460513	1	-0.0641836	1	-0.0679032	-0.255254	1	1	FALSE
Actr5	0.00897267	1	-0.0269227	1	-0.00490867	1	-0.00962126	1	-0.0259742	1	0.0158855	1	-0.0644403	1	0.0293447	1	0.0296742	1	0.0135273	1	-0.0116908	0.00479829	1	1	FALSE
Actr6	-0.0412455	1	0.0261513	1	-0.0811887	1	-0.00466152	1	0.0368381	1	0.00125592	1	0.0416243	1	-0.0509866	1	-0.0526518	1	-0.18724	1	-0.0128212	-0.0495996	1	1	FALSE
Actr8	-0.00932123	1	0.0228649	1	0.0456746	1	-0.0258946	1	0.0339239	1	0.0261821	1	0.0450642	1	0.00315691	1	0.14698	1	0.0631808	1	0.0134495	0.0569129	1	1	FALSE
Acvr1	0.0525728	1	0.0391923	1	0.0610985	1	-0.163946	1	0.0400038	1	0.015664	1	-0.12272	1	-0.0917705	1	-0.0512332	1	-0.0683287	1	0.00578425	-0.0636777	1	1	FALSE
Acvr2a	0.0167498	1	-0.041675	1	0.0414747	1	-0.0304273	1	0.00308378	1	0.0211298	1	0.00990767	1	-0.0102757	1	0.0175817	1	0.026417	1	-0.00215882	0.0129521	1	1	FALSE
Acvr2b	0.0183132	1	-0.00776999	1	0.0335465	1	0.032264	1	-0.0494193	0.0447209	0.0242737	1	0.033647	1	-0.00899877	1	0.0682127	1	0.0462597	1	0.00538687	0.0326788	0.79692	1	FALSE
Acy1	0.0336954	1	-0.00986459	1	-0.0416238	1	0.00706066	1	-0.0161344	1	0.00992528	1	0.0219846	1	-0.00690741	1	-0.121234	1	0.0651126	1	-0.00537334	-0.00622378	1	1	FALSE
Acyp1	0.0253742	1	0.0291704	1	0.0417629	1	0.100383	1	0.0217374	1	0.161578	0.870892	-0.166664	1	-0.00406136	1	-0.038598	1	0.194196	1	0.0436856	0.02929	1	1	FALSE
Acyp2	-0.0698396	0.329548	-0.0317799	1	0.044124	1	-0.0117804	1	-0.0762506	0.00298009	-0.216876	1	-0.0708241	1	-0.0798744	1	-0.0510817	1	0.02519	1	-0.0291053	-0.0786931	0.179865	1	FALSE
Adam10	0.113596	1	0.158795	1	-0.154949	1	0.177411	1	0.13333	1	0.0599398	1	-0.0706137	1	-0.321602	1	-0.0757835	1	-0.179202	1	0.0856364	-0.117452	1	1	FALSE
Adam12	-0.0546803	3.93073e-11	-0.0719088	0.0106641	-0.0679644	1	-0.0155834	1	-0.0793482	8.86325e-27	-0.0390602	2.77447e-06	-0.0471616	1	-0.0123259	1	-0.0698482	1	-0.0319971	1	-0.057897	-0.0400786	9.93521e-33	0.0043324	FALSE
Adam15	0.0327787	1	0.0275468	1	-0.0561751	1	-0.030164	1	-0.0909235	0.00718971	0.0332484	1	0.0684751	1	0.230411	1	0.10175	1	-0.0742937	1	-0.0233874	0.0719183	0.451953	1	FALSE
Adam17	0.00528013	1	-0.0355707	1	-0.0730475	1	0.237034	1	-0.0382977	1	-0.194909	1	0.0767448	1	-0.122012	1	-0.0594677	1	-0.112757	1	0.0190797	-0.0824803	1	1	FALSE
Adam8	-0.0259198	1	-0.0555794	1	-0.0945501	1	0.000624124	1	0.0351749	1	0.0431651	1	0.0313317	1	-0.0190078	1	-0.0943595	1	-0.00438962	1	-0.0280501	-0.00865201	1	1	FALSE
Adam9	0.0940243	1	0.0612849	1	0.136691	1	0.0578918	1	0.0842338	1	0.0170368	1	-0.138261	1	-0.0316312	1	-0.0714792	1	-0.0100915	1	0.0868253	-0.0468853	1	1	FALSE
Adamts1	-0.129687	1	-0.219367	1	-0.0414582	1	-0.186556	1	0.010309	1	-0.349716	1	-0.640093	1	-0.554147	1	-0.0037725	1	-0.339421	1	-0.113352	-0.37743	1	1	FALSE
Adamts10	-0.0147786	1	-0.0490647	1	-0.0282449	1	-0.0150127	1	-0.0387237	1.62554e-05	-0.0162144	1	-0.163182	1	-0.0395448	1	-0.0246286	1	-0.000628204	1	-0.0291649	-0.0488396	0.014831	1	FALSE
Adamts14	-0.02251	1	-0.0490159	1	-0.0351978	1	-0.0472691	1	-0.0245816	0.860226	-0.00341112	1	-0.0165929	1	0.0285446	1	0.0222132	1	0.0117386	1	-0.0357149	0.00849845	0.999999	1	FALSE
Adamts4	0.0221009	1	0.00261717	1	-0.0317924	1	-0.0243469	1	0.00232682	1	0.0131374	1	-0.0260381	1	0.000923236	1	-0.0612035	1	-0.0403361	1	-0.0058189	-0.0227034	1	1	FALSE
Adamts6	-0.00415141	1	-0.0600311	1	-0.0757814	1	-0.0234127	1	-0.0249899	1	0.018435	1	-0.0111343	1	-0.00800198	1	-0.00734317	1	-0.0163882	1	-0.0376733	-0.00488653	1	1	FALSE
Adamts8	-0.0563586	4.37684e-06	-0.0454799	1	-0.017751	1	-0.00576971	1	-0.082129	9.95705e-31	-0.0272055	1	-0.0270146	1	-0.00255406	1	0.00415371	1	0.00389783	1	-0.0414976	-0.00974453	8.38731e-30	1	FALSE
Adamtsl3	-0.0589767	0.204332	-0.0335948	1	-0.0166265	1	-0.105275	1	-0.112299	1.86308e-17	-0.0277187	1	0.0255882	1	-0.0462886	1	-0.0590206	1	-0.135246	1	-0.0653543	-0.0485372	4.547e-13	1	FALSE
Adar	-0.062586	0.458898	0.0532	1	-0.231744	1	-0.08155	1	-0.0342323	1	0.00858065	1	-0.0305211	1	-0.0593586	1	0.168674	1	-0.0519473	1	-0.0713824	0.00708547	0.998744	1	FALSE
Adarb1	0.0642023	1	0.0330322	1	0.039117	1	0.246038	1	0.0246195	1	0.0901628	1	0.111176	1	-0.0828045	1	-0.015017	1	-0.0271556	1	0.0814018	0.0152723	1	1	FALSE
Adat2	-0.0519817	1	-0.0219915	1	-0.0426524	1	0.00510211	1	-0.0476933	0.0018432	-0.0715053	1	-0.0336772	1	0.070685	1	0.00399603	1	-0.00991301	1	-0.0318434	-0.0080829	0.247356	1	FALSE
Adck1	-0.0149554	1	-0.00837985	1	-0.0221568	1	-0.0452716	1	-0.0339169	0.0249419	-0.00276845	1	-0.00311977	1	-0.0142234	1	-0.0190619	1	-0.0255445	1	-0.0249361	-0.0129436	0.688916	1	FALSE
Adck5	-0.0548506	1	-0.0117015	1	-0.0644486	1	-0.00981737	1	-0.00656378	1	0.0581966	1	0.00377223	1	0.0221669	1	0.013855	1	-0.00959979	1	-0.0294764	0.0176782	1	1	FALSE
Adcy3	0.00111266	1	-0.00799271	1	-0.0253908	1	0.00191462	1	0.0127888	1	-0.00748698	1	-0.140602	1	-0.158659	1	-0.00369273	1	-0.0327083	1	-0.00351349	-0.0686299	1	1	FALSE
Adcy6	-0.0303458	1	0.0135484	1	0.0373534	1	-0.0339933	1	-0.0370328	0.046743	0.0119672	1	-0.0353657	1	0.0200431	1	-0.0130196	1	0.00609989	1	-0.010094	-0.00205503	0.804553	1	FALSE
Adcy7	-0.0683436	0.132732	-0.0859529	0.80316	-0.0122077	1	0.103998	1	-0.061836	0.105745	-0.0531404	1	-0.0371232	1	0.00051	1	0.0727069	1	0.0145083	1	-0.0248685	-0.00050769	0.534886	1	FALSE
Add1	0.00689816	1	0.130847	1	-0.0844127	1	0.0433217	1	-0.0576013	1	0.0483966	1	0.0549791	1	-0.0121915	1	0.0657399	1	-0.0169487	1	0.0078105	0.0279951	1	1	FALSE
Add2	-0.0307188	1	0.0240751	1	-0.0273062	1	0.0199003	1	-0.0620107	1.15628e-05	-0.0167492	1	-0.0210308	1	-0.0732835	1	-0.0104973	1	-0.0640517	0.102391	-0.0152121	-0.0371225	0.0117664	0.918691	FALSE
Add3	0.0215932	1	-0.00739306	1	0.17311	1	-0.077739	1	-0.0273937	1	-0.0665426	1	0.0185388	1	-0.154023	1	-0.0454595	1	0.0686977	1	0.0164355	-0.0357577	1	1	FALSE
Adgra3	-0.0401826	1	-0.0829591	1	0.0101183	1	0.0279725	1	-0.0818974	1.67771e-05	-0.00869205	1	-0.0255295	1	-0.0156029	1	-0.111175	1	-0.0215365	1	-0.0333897	-0.0365071	0.0151506	1	FALSE
Adgrg6	0.140841	1	0.0771991	1	-0.144551	1	0.17652	1	0.153011	0.0595764	0.0757147	1	0.0226213	1	-0.0638234	1	0.0709251	1	0.0541071	1	0.0806041	0.031909	0.84447	1	FALSE
Adgrl2	0.0385704	1	0.0495416	1	0.0184379	1	0.0583578	1	0.00194037	1	0.060062	1	0.12077	1	-0.0486205	1	0.392072	1	0.08787	1	0.0333696	0.122431	1	1	FALSE
Adh5	-0.0139784	1	-0.0213871	1	0.0552256	1	0.0239176	1	-0.213294	6.92657e-15	0.00906064	1	0.143735	1	0.148878	1	-0.186435	1	-0.0343439	1	-0.0339033	0.016179	3.70029e-10	1	FALSE
Adi1	0.06471	1	-0.037199	1	-0.0169799	1	0.0740849	1	0.00399838	1	-0.0466721	1	-0.0610043	1	-0.0554613	1	0.0293732	1	-0.0969995	1	0.0177229	-0.0461528	1	1	FALSE
Adipor1	0.0122201	1	0.0286412	1	-0.0002662	1	-0.0947119	1	0.0726873	1	0.00256313	1	0.0549437	1	0.0696441	1	0.0346778	1	0.0856895	1	0.0037141	0.0495036	1	1	FALSE
Adipor2	0.0824578	1	-0.0179075	1	-0.0200179	1	0.251636	1	0.0718582	1	0.102803	1	0.0688077	1	-0.40821	1	0.107923	1	-0.0968099	1	0.0736054	-0.0450974	1	1	FALSE
Adk	0.0157235	1	-0.0274309	1	-0.151871	1	0.0608672	1	-0.000366644	1	-0.0349779	1	-0.00884464	1	-0.0278288	1	0.0409272	1	0.0634948	1	-0.0206156	0.00655414	1	1	FALSE
Adm	0.19898	1	0.117767	1	0.230394	1	0.0837137	1	0.490632	3.92662e-16	-0.0275528	1	0.195909	1	-0.0315494	1	0.398507	1	-0.317157	1	0.224297	0.0436311	2.90903e-11	1	FALSE
Adnp	0.00534608	1	-0.02659	1	-0.16238	1	0.144386	1	-0.0621799	0.00105665	-0.0178911	1	-0.0163646	1	-0.0900213	1	-0.0147515	1	-0.00334004	1	-0.0202837	-0.0284737	0.186863	1	FALSE
Adnp2	-0.0151272	1	-0.0158772	1	0.0288257	1	0.0220273	1	0.00702746	1	0.0310052	1	0.0382581	1	0.0495519	1	-0.00702993	1	-0.0102376	1	0.00537522	0.0203096	1	1	FALSE
Ado	0.0224876	1	0.0878011	1	-0.0433546	1	-0.167175	1	0.214795	7.60528e-11	-0.00194812	1	-0.0506907	1	-0.121149	1	0.012127	1	-0.344395	1	0.0229108	-0.101211	1.11671e-06	1	FALSE
Adpgk	-0.0190566	1	-0.0590971	1	-0.0373899	1	-0.0412281	1	-0.0460707	1	-0.0229925	1	-0.147974	1	-0.0502764	1	-0.0663787	1	-0.0315591	1	-0.0405685	-0.0638361	1	1	FALSE
Adprh	0.0720611	1	-0.0275139	1	0.0822565	1	0.108878	1	-0.00513487	1	0.0880357	1	0.0757607	1	-0.232202	1	-0.00940559	1	0.102549	1	0.0461093	0.00494754	1	1	FALSE
Adprhl2	-0.00950648	1	0.00653655	1	-0.000663248	1	0.0286159	1	-0.0508345	1	-0.172132	1	-0.0798497	1	-0.196614	1	-0.0296956	1	-0.051923	1	-0.00517034	-0.106043	1	1	FALSE
Adprm	0.000203003	1	0.0273711	1	-0.0499874	1	0.00166305	1	-0.00563491	1	0.0326162	1	0.0902236	1	-0.0673374	1	-0.124315	1	-0.0190853	1	-0.00527702	-0.0175797	1	1	FALSE
Adrm1	-0.0581213	1	-0.151663	1	0.0593854	1	0.137773	1	-0.083135	1	0.0854123	1	0.0485584	1	-0.0785404	1	-0.184208	1	-0.0917018	1	-0.0191522	-0.044096	1	1	FALSE
Adsl	-0.0350811	1	-0.0201214	1	0.0546067	1	-0.0307358	1	-0.0495484	1	-0.117129	1	-0.0334746	1	-0.000321502	1	-0.0579153	1	-0.0253827	1	-0.016176	-0.0468445	1	1	FALSE
Adss	0.0655282	1	-0.0722399	1	-0.113126	1	-0.205577	1	0.149383	0.734053	0.0188333	1	-0.0563524	1	-0.101723	1	0.251504	1	-0.377703	1	-0.0352064	-0.0530883	0.999982	1	FALSE
Adssl1	0.0295048	1	0.113705	1	0.0952157	1	0.100599	1	-0.00303787	1	-0.0263754	1	0.0480258	1	0.366368	1	-0.00512252	1	0.0072248	1	0.0671974	0.0780242	1	1	FALSE
Aebp2	0.0140459	1	-0.0603494	1	-0.195462	1	-0.158733	1	-0.0031104	1	-0.0584486	1	-0.0706527	1	-0.188012	1	-0.055958	1	0.130844	1	-0.0807217	-0.0484455	1	1	FALSE
Aen	-0.016672	1	-0.116727	1	0.0160186	1	-0.043987	1	-0.0247157	1	-0.00910185	1	0.0164645	1	-0.059182	1	-0.317443	1	-0.0418115	1	-0.0372166	-0.0822147	1	1	FALSE
Aes	0.0951343	1	0.309962	0.0695966	0.0324055	1	0.220789	1	-0.00610407	1	0.0402336	1	0.0658132	1	0.260183	1	0.105064	1	0.113613	1	0.130437	0.116981	0.868066	1	FALSE
Afap1	-0.00410809	1	-0.15559	1	-0.221572	1	-0.193024	1	-0.038578	1	0.112897	1	-0.0193858	1	-0.136136	1	0.0934688	1	0.0891195	1	-0.122574	0.0279927	1	1	FALSE
Afap1l2	0.0389056	1	0.0511366	1	0.0910436	1	-0.00597952	1	0.0797232	0.000132167	0.0429712	1	-0.0268906	1	-3.1307e-06	1	0.059178	1	0.00691005	1	0.0509659	0.0164331	0.057321	1	FALSE
Afdn	0.0484531	1	0.0553397	1	-0.235559	1	-0.207327	1	-0.0449836	1	0.0323983	1	-0.0801505	1	-0.0145137	1	0.098727	1	-0.0875791	1	-0.0768155	-0.0102236	1	1	FALSE
Aff1	-0.0311661	1	-0.00543128	1	-0.105775	1	-0.0941259	1	-0.0298044	1	-0.073332	1	-0.135277	1	-0.0825065	1	-0.0463516	1	-0.132981	1	-0.0532606	-0.0940896	1	1	FALSE
Aff4	0.0615123	1	-0.068405	1	-0.221378	1	-0.110769	1	0.00244888	1	0.0333496	1	0.0185854	1	-0.00224426	1	0.330994	1	-0.222875	1	-0.0673182	0.031562	1	1	FALSE
Afg1l	-0.00613966	1	-0.00516203	1	-0.0136161	1	-0.0101583	1	0.00173698	1	-0.0129097	1	-0.00863612	1	-0.0176948	1	0.0143901	1	-0.00201793	1	-0.00666781	-0.00537369	1	1	FALSE
Afg3l1	-0.00284024	1	-0.116957	1	-0.0919258	1	-0.0192665	1	-0.0491922	1	-0.00241665	1	-0.152619	1	-0.018408	1	0.0777056	1	-0.151001	1	-0.0560363	-0.0493478	1	1	FALSE
Afg3l2	0.0547664	1	-0.0461563	1	0.01026	1	-0.0864651	1	0.00711413	1	0.0208089	1	0.00749697	1	0.0128431	1	0.0814417	1	-0.00281028	1	-0.0120962	0.0239561	1	1	FALSE
Aftph	0.0138468	1	0.0373299	1	-0.0759331	1	0.0472926	1	0.0505581	1	0.00760297	1	0.142252	1	-0.0659982	1	0.119013	1	0.0894589	1	0.0146188	0.0584656	1	1	FALSE
Aga	0.0301937	1	0.0950923	1	0.0421739	1	0.160378	1	-0.0622849	1	0.0954632	1	0.0602425	1	0.101151	1	-0.152446	1	0.0405414	1	0.0531106	0.0289905	1	1	FALSE
Agap1	-0.0418597	1	0.00470802	1	-0.115959	1	-0.073519	1	-0.179952	6.46128e-18	-0.0187802	1	-0.0926905	1	0.224504	1	-0.328353	1	0.0228035	1	-0.0813163	-0.0385034	7.32856e-13	1	FALSE
Agap3	0.0553593	1	0.011769	1	-0.0974161	1	0.0278804	1	0.00262363	1	-0.174955	1	-0.0053847	1	-0.108413	1	-0.00911835	1	-0.0411894	1	4.32381e-05	-0.0678119	1	1	FALSE
Agbl3	-0.0313274	1	-0.0344829	1	-0.0077902	1	-0.0572193	1	-0.0338768	0.000108252	0.00109024	1	-0.0144369	1	0.0109699	1	-0.0275574	1	0.0391835	1	-0.0329393	0.00184987	0.0507002	1	FALSE
Agbl5	-0.0127973	1	-0.030698	1	0.0202388	1	0.0904271	1	-0.0175056	1	0.00389262	1	-0.0336817	1	0.0424638	1	-0.0483159	1	-0.0171648	1	0.00993301	-0.0105612	1	1	FALSE
Agfg1	-0.20074	1.61013e-07	0.0171238	1	-0.213959	1	-0.192092	1	-0.216994	3.48781e-14	-0.321401	1	-0.128451	1	-0.115562	1	-0.17133	1	-0.083702	1	-0.161332	-0.164089	1.20741e-15	1	FALSE
Agfg2	0.0354345	1	-0.00787235	1	0.0361286	1	-0.0145663	1	-0.00795431	1	0.0217215	1	0.0339049	1	-0.0524945	1	0.0151662	1	0.0315733	1	0.00823403	0.00997426	1	1	FALSE
Aggf1	0.00840167	1	-0.0420248	1	-0.133093	1	-0.0827632	1	0.0334085	1	-0.170821	1	0.0333715	1	0.0149506	1	0.167679	1	0.0524489	1	-0.0432141	0.0195258	1	1	FALSE
Agk	0.00779917	1	0.0267349	1	0.00282866	1	-0.0256726	1	-0.0272425	1	0.011094	1	0.00766902	1	-0.012466	1	-0.00532243	1	-0.0284244	1	-0.00311048	-0.00548997	1	1	FALSE
Agl	0.0365452	1	-0.0657415	1	-0.14361	1	-0.181176	1	0.00461566	1	0.00556986	1	-0.0766832	1	-0.0733045	1	0.0338723	1	0.0702034	1	-0.0698734	-0.00806842	1	1	FALSE
Ago1	-0.00554147	1	0.0669235	1	-0.12255	1	-0.0662667	1	-0.061833	0.00227716	0.00025575	1	0.0274355	1	0.00467321	1	0.0630013	1	0.0234218	1	-0.0378536	0.0237575	0.273863	1	FALSE
Ago2	0.0324854	1	-0.0214612	1	-0.226342	1	0.0435162	1	0.0163416	1	0.018009	1	-0.0874753	1	-0.257267	1	0.0420118	1	-0.0438443	1	-0.0310921	-0.0657132	1	1	FALSE
Ago3	0.0105585	1	-0.0887567	0.596896	-0.195666	1	0.205458	1	5.69948e-05	1	-0.0120449	1	0.0206444	1	0.0612601	1	0.0178295	1	-0.0110864	1	-0.0136698	0.0153205	0.999801	1	FALSE
Agpat1	0.0265109	1	0.0237795	1	-0.0631594	1	-0.0634185	1	0.051513	1	0.0250127	1	-0.0574041	1	-0.0596298	1	-0.166854	1	0.0357037	1	-0.00495491	-0.0446343	1	1	FALSE
Agpat2	-0.0119775	1	0.0958071	1	-0.0703888	1	0.0488399	1	-0.0173244	1	0.177703	0.00172947	0.0852264	1	0.0719024	1	-0.00666342	1	0.113983	1	0.00899125	0.0884303	1	0.239758	FALSE
Agpat3	-0.0875058	1	0.0154476	1	-0.156772	1	-0.107204	1	-0.145539	1.61476e-05	-0.0160192	1	-0.152358	1	0.088306	1	-0.181493	1	-0.292875	1	-0.0963146	-0.110888	0.0147645	1	FALSE
Agpat4	0.0278986	1	-0.0614203	1	0.0196796	1	0.13156	1	-0.0724006	1.9333e-05	0.0148749	1	-0.00277611	1	0.226389	1	0.0668482	1	0.0235467	1	0.0090635	0.0657766	0.0166667	1	FALSE
Agpat5	0.0883492	1	-0.132424	1	-0.163463	1	0.0778758	1	0.0563384	1	0.0448794	1	-0.112249	1	-0.0540229	1	-0.126477	1	-0.219305	1	-0.0146647	-0.0934349	1	1	FALSE
Agps	0.02161	1	-0.00974645	1	-0.0818633	1	-0.100499	1	0.00525479	1	0.0823077	1	-0.0144376	1	-0.0878988	1	0.0910301	1	-0.045535	1	-0.0330487	0.00509328	1	1	FALSE
Agrn	0.101963	1	0.0140099	1	-0.181698	1	0.137888	1	-0.0867107	0.391752	-0.0859409	1	-0.134927	1	-0.128358	1	0.0527247	1	-0.0144631	1	-0.00290945	-0.0621929	0.997216	1	FALSE
Agtpbp1	0.0234754	1	0.0301871	1	0.0642325	1	-0.0252761	1	0.00728049	1	0.0344019	1	0.000771539	1	-0.01168	1	0.0162433	1	0.00673283	1	0.0199799	0.00929392	1	1	FALSE
Agtrap	-0.0478155	0.207896	-0.0464194	1	-0.0100586	1	0.0756809	1	-0.0121645	1	0.0432236	1	-0.0766908	1	0.0648274	1	-0.0228176	1	0.0624183	1	-0.00815541	0.0141922	0.977897	1	FALSE
Ahctf1	0.0409461	1	-0.115303	1	-0.202241	1	-0.0945106	1	0.0200522	1	0.104999	1	0.0277614	1	-0.0405828	1	0.129335	1	0.0738811	1	-0.0702111	0.0590787	1	1	FALSE
Ahcyl1	0.000595414	1	-0.117606	0.692891	-0.198587	1	-0.115411	1	-0.0722875	0.438279	-0.0358879	1	-0.0646706	1	0.00828561	1	-0.0823021	1	-0.0011368	1	-0.100659	-0.0351424	0.992466	1	FALSE
Ahcyl2	0.0168076	1	0.00724141	1	-0.0503923	1	-0.0457377	1	0.0317177	1	0.0252535	1	0.0625993	1	-0.0187712	1	-0.101127	1	0.0671337	1	-0.00807263	0.00701769	1	1	FALSE
Ahdc1	0.0325868	1	0.0319297	1	-0.0531456	1	-0.0275313	1	-0.0489352	1	0.0483595	1	-0.0144568	1	-0.0923828	1	0.125817	1	0.0617391	1	-0.0130192	0.0258153	1	1	FALSE
Ahi1	0.0572818	1	-0.00824669	1	-0.0349505	1	-0.0173643	1	0.0301518	1	0.0150834	1	0.00456371	1	0.0354557	1	0.0653561	1	0.0166493	1	0.00537442	0.0274216	1	1	FALSE
Ahnak	0.110041	1	0.0293398	1	-0.0839322	1	-0.221429	1	0.207547	1	-0.0179476	1	-0.0495315	1	-0.635861	1	0.113219	1	-0.128845	1	0.00831327	-0.143793	1	1	FALSE
Ahnak2	0.107886	1	0.210295	1	0.235682	1	0.0961649	1	0.357471	9.97176e-08	0.288289	1	0.254447	0.00317457	0.283575	1	0.18988	1	0.421806	1	0.2015	0.287599	0.000364915	0.319537	FALSE
Ahr	-0.0667263	1	-0.042894	1	-0.0256256	1	0.0562512	1	-0.167905	0.00473489	-0.0832844	1	-0.0348458	1	-0.0238749	1	0.0757779	1	-0.0294937	1	-0.0493799	-0.0191442	0.38091	1	FALSE
Ahsa1	-0.123959	1	-0.215251	0.035374	-0.0208511	1	0.110464	1	-0.0955044	0.0883074	-0.082852	1	-0.11431	1	-0.161694	1	-0.0837766	1	-0.698696	1	-0.0690203	-0.228266	0.317207	1	FALSE
Ahsa2	-0.150626	5.04322e-05	-0.207335	0.000407637	-0.1233	1	-0.0927945	1	-0.120918	8.38147e-07	-0.233167	1	-0.0939681	1	-0.0933217	1	-0.165235	1	-0.142884	1	-0.138995	-0.145715	8.24888e-10	1	FALSE
AI314180	-0.0240955	1	-0.144105	1	-0.138523	1	-0.161178	1	-0.0172855	1	0.00820073	1	-0.0748809	1	-0.0836964	1	-0.0209384	1	0.123745	1	-0.0970375	-0.00951389	1	1	FALSE
AI413582	0.221256	0.0430529	0.096837	1	0.303242	1	-0.0148242	1	0.144116	0.480446	0.279281	1.5046e-07	0.364996	0.121817	0.401052	1	0.0229416	1	0.27272	1	0.150125	0.268198	0.652585	9.74451e-05	FALSE
AI467606	0.0334177	1	-0.0412361	1	0.0125259	1	-0.0736458	1	-0.0428686	1	0.0102489	1	-0.185863	1	-0.019602	1	0.0519783	1	0.0252519	1	-0.0223614	-0.0235972	1	1	FALSE
AI597479	0.0111205	1	-0.0327168	1	-0.0690026	1	-0.0523112	1	-0.00355543	1	0.000243865	1	-0.0418574	1	-0.0662879	1	-0.0131124	1	0.00525896	1	-0.0292931	-0.023151	1	1	FALSE
AI606181	-0.0189371	1	0.00648683	1	-0.00649128	1	-0.0896828	1	0.00436387	1	0.0142072	1	0.0338763	1	-0.0126274	1	-0.000191474	1	0.0384822	1	-0.0208521	0.0147494	1	1	FALSE
AI661453	0.000660416	1	-0.0291509	1	-0.000888373	1	0.0298183	1	0.00263386	1	0.0179366	1	0.0190365	1	-0.0314386	1	0.0188115	1	-0.040664	1	0.000614657	-0.0032636	1	1	FALSE
AI837181	-0.1434	0.00280976	-0.0131715	1	-0.185788	1	-0.106347	1	-0.109494	0.000586892	-0.166797	1	0.0725611	1	-0.240522	1	-0.273756	1	-0.0959339	1	-0.11164	-0.14089	0.00297847	1	FALSE
AI987944	0.0611163	1	0.0302644	1	0.0107233	1	0.0314452	1	0.0161143	1	-0.0245073	1	-0.0433217	1	0.0199062	1	0.0166304	1	0.0193362	1	0.0299327	-0.00239123	1	1	FALSE
Aida	-0.0608416	1	-0.13128	1	0.0208601	1	-0.158821	1	-0.186906	3.83587e-16	-0.0718361	1	-0.00587688	1	0.0597516	1	0.153774	1	-0.0163027	1	-0.103398	0.023902	2.84908e-11	1	FALSE
Aif1l	0.1052	1	-0.00323621	1	-0.0402361	1	0.037708	1	0.19758	8.68998e-09	0.12022	1	-0.0823703	1	-0.00873341	1	0.0576659	1	-0.334899	1	0.0594032	-0.0496234	5.39039e-05	1	FALSE
Aifm1	0.0379068	1	-0.0660138	1	0.0411977	1	0.0502842	1	-0.0404149	1	0.0474038	1	-0.248463	1	-0.0965926	1	-0.0511856	1	0.0292152	1	0.00459201	-0.0639243	1	1	FALSE
Aifm2	-0.0282282	1	-0.0160962	1	-0.128861	1	-0.0637653	1	-0.0911931	1.19443e-05	-0.0364368	1	-0.0357142	1	-0.0282926	1	-0.0114905	1	-0.0397926	1	-0.0656288	-0.0303453	0.0120303	1	FALSE
Aig1	-0.229605	0.000237552	-0.00776632	1	-0.191367	1	-0.217895	1	-0.293319	1.07007e-13	-0.266539	1	-0.0697602	1	0.106061	1	-0.222598	1	-0.0509198	1	-0.187991	-0.100751	2.51387e-12	1	FALSE
Aimp1	-0.153322	0.000171486	-0.0119725	1	-0.00068431	1	0.00230733	1	-0.0828891	1	-0.238532	1	-0.096846	1	0.0722651	1	-0.132972	1	-0.0291609	1	-0.049312	-0.0850492	0.0671304	1	FALSE
Aimp2	-0.0467895	1	-0.101072	1	0.120729	1	-0.0281481	1	-0.039688	1	0.0797266	1	0.0177351	1	0.122465	1	0.198349	1	-0.0029568	1	-0.0189937	0.0830638	1	1	FALSE
Aip	-0.0754714	1	0.0146192	1	0.15556	1	0.070768	1	0.00371608	1	0.0881967	1	-0.0741213	1	0.0624888	1	0.0381413	1	-0.0425843	1	0.0338383	0.0144242	1	1	FALSE
Ajuba	-0.00551879	1	-0.00890437	1	-0.0326725	1	0.102793	1	-0.0368024	0.110363	-0.0675966	0.0289579	-0.0870483	1	-0.1314	1	-0.161157	1	-0.0681587	0.877144	0.00377896	-0.103072	0.927072	0.692427	FALSE
Ak2	-0.185321	0.0349955	-0.0283439	1	-0.283262	1	-0.175889	1	0.149343	0.293404	-0.238358	1	-0.331838	1	-0.357329	1	-0.327086	1	-0.317899	1	-0.104695	-0.314502	0.517226	1	FALSE
Ak3	0.0400814	1	0.0617719	1	0.0428613	1	0.0473256	1	0.0435062	1	0.0889764	1	0.0829766	1	0.0385175	1	0.170194	1	0.0633789	1	0.0471093	0.0888087	1	1	FALSE
Ak4	0.0432232	1	-0.060323	1	0.0898805	1	-0.160092	1	0.020105	1	-0.0307146	1	-0.0124989	1	0.000889898	1	-0.0116243	1	-0.0211179	1	-0.0134413	-0.0150132	1	1	FALSE
Ak6	0.0829031	1	0.0184612	1	0.0052776	1	-0.0934377	1	0.172197	0.000417551	0.0875699	1	0.0946411	1	-0.00358226	1	0.0373287	1	-0.0769493	1	0.0370802	0.0278016	0.112869	1	FALSE
Akap1	0.044024	1	-0.0228263	1	0.014392	1	0.182279	1	0.0236328	1	-0.00129968	1	0.0397625	1	-0.0188944	1	0.0125932	1	-0.00671894	1	0.0483002	0.00508855	1	1	FALSE
Akap10	0.0239026	1	0.00169125	1	-0.0394214	1	-0.0089333	1	0.0131174	1	-0.0147298	1	-0.0452564	1	0.00587097	1	0.0819991	1	-0.00858263	1	-0.00192869	0.00386025	1	1	FALSE
Akap11	0.103508	1	0.0151228	1	0.00700317	1	0.00699031	1	-0.0139169	1	-0.128844	1	-0.0623418	1	-0.107625	1	-0.0597024	1	-0.0630448	1	0.0237416	-0.0843116	1	1	FALSE
Akap13	0.0858862	1	0.0577463	1	0.0454704	1	-0.0630416	1	0.22339	1.49603e-06	0.0688257	1	-0.0288672	1	-0.038192	1	0.138213	1	-0.00750213	1	0.0698903	0.0264955	0.00277518	1	FALSE
Akap2	-0.0946039	7.55803e-05	-0.117711	0.0209814	-0.211793	1	-0.135241	1	-0.11154	3.69419e-07	-0.12972	0.0237423	-0.109168	1	-0.236829	1	-0.0120329	1	-0.100207	1	-0.134178	-0.117591	1.77927e-08	0.679389	FALSE
Akap7	0.0880037	1	-0.0378149	1	0.0672535	1	0.0795564	1	0.0504775	1	0.068317	1	0.00127174	1	-0.0217433	1	-0.0662238	1	0.139301	1	0.0494952	0.0241846	1	1	FALSE
Akap8	0.000947854	1	0.020488	1	-0.166546	1	0.179793	1	-0.0271459	1	0.00886291	1	0.00703587	1	0.0252139	1	0.0908581	1	-0.0175477	1	0.0015074	0.0228846	1	1	FALSE
Akap8l	-0.0168892	1	-0.0283078	1	-0.209939	1	-0.056668	1	-0.0266287	1	0.120328	1	0.136522	1	0.0270528	1	0.0863236	1	0.204373	1	-0.0676867	0.11492	1	1	FALSE
Akap9	-0.127041	1	-0.141328	1	-0.278823	1	-0.153823	1	-0.0838329	1	-0.138423	1	-0.18065	1	0.303029	1	-0.147757	1	-0.354094	1	-0.156969	-0.103579	1	1	FALSE
Akirin1	-0.0610843	1	-0.15288	0.0432241	-0.152131	1	-0.0883954	1	-0.0297874	1	-0.206604	1	-0.0783695	1	-0.262746	1	-0.0416437	1	0.00068806	1	-0.0968555	-0.117735	0.790978	1	FALSE
Akirin2	-0.0476545	1	-0.0900739	1	0.0969406	1	-0.0316933	1	-0.0613822	1	-0.0658413	1	-0.11952	1	-0.167363	1	-0.0296434	1	-0.293623	1	-0.0267727	-0.135198	1	1	FALSE
Akr1a1	-0.186159	0.0300738	-0.0248592	1	-0.042129	1	0.0697736	1	-0.155516	1.42831e-06	-0.206604	1	-0.077784	1	-0.00541806	1	-0.333174	1	-0.200908	1	-0.0677779	-0.164778	0.000190087	1	FALSE
Akr1b10	-0.0429702	1	-0.0365393	1	-0.0131082	1	-0.128906	1	-0.0509806	0.00647898	-0.0272136	1	-0.0318667	1	-0.0756477	1	0.0176588	1	-0.049356	1	-0.0545008	-0.0332851	0.433643	1	FALSE
Akr1b3	0.0325879	1	0.087269	1	0.0527405	1	0.125442	1	0.0191385	1	0.141566	1	0.0116583	1	0.0741713	1	0.0227021	1	0.166508	1	0.0634355	0.0833212	1	1	FALSE
Akr1b8	0.00105949	1	-0.033019	1	0.0697669	1	-0.0271584	1	0.0035708	1	0.0454714	1	-0.066194	1	0.017632	1	-0.0782258	1	-0.0119662	1	0.00284397	-0.0186565	1	1	FALSE
Akr1e1	-0.000857119	1	-0.00561205	1	2.28994e-05	1	0.101185	1	-0.00892998	1	-0.0379315	1	0.0432497	1	0.0752933	1	-0.155506	1	0.0704968	1	0.0171617	-0.000879637	1	1	FALSE
Akr7a5	-0.0368142	1	0.0442685	1	0.0784586	1	0.00455719	1	-0.0571442	1	0.126501	1	0.115545	1	0.193702	1	0.206866	1	0.107325	1	0.00666517	0.149988	1	1	FALSE
Akt1	-0.219817	4.31405e-06	-0.112083	1	0.078293	1	-0.108992	1	-0.171816	1.82957e-06	-0.100872	1	-0.095026	1	-0.223185	1	-0.0558376	1	0.0252676	1	-0.106883	-0.0899307	1.65248e-07	1	FALSE
Akt1s1	0.113448	1	-0.00624938	1	0.0121897	1	-0.0192688	1	0.0450846	1	0.133846	1	0.0115922	1	0.0834847	1	-0.0934356	1	0.158511	1	0.0290409	0.0587997	1	1	FALSE
Akt2	0.0334357	1	-0.0362902	1	-0.0721213	1	-0.0700682	1	-0.0312306	1	0.0143422	1	-0.173167	1	0.0316425	1	-0.0652585	1	-0.117423	1	-0.0352549	-0.0619727	1	1	FALSE
Akt3	-0.00717046	1	-0.0218299	1	0.000101936	1	-0.00144084	1	-0.0570326	1	-0.00566789	1	-0.0818658	1	-0.0228898	1	0.0161305	1	-0.0668399	1	-0.0174744	-0.0322266	1	1	FALSE
Aktip	0.0976047	1	0.0418566	1	0.050307	1	0.0229268	1	-0.00272167	1	0.0704895	1	-0.0129733	1	0.0736816	1	0.0886876	1	-0.0342915	1	0.0419947	0.0371188	1	1	FALSE
Alad	-0.000239873	1	-0.152096	1	-0.0738502	1	0.114857	1	-0.0623914	1	0.124845	1	-0.0152389	1	0.144954	1	0.00736959	1	0.0244807	1	-0.0347441	0.0572821	1	1	FALSE
Alas1	0.0528735	1	0.0294734	1	0.0727749	1	0.0456438	1	0.102154	0.162803	0.061164	1	-0.0862452	1	-0.216417	1	-0.10971	1	0.0293535	1	0.0605839	-0.0643711	0.962483	1	FALSE
Alcam	0.0435251	1	0.299148	1	0.0954479	1	0.468601	1	0.0107674	1	-0.00575476	1	0.146337	1	0.0556476	1	0.0276763	1	-0.254005	1	0.183498	-0.00601965	1	1	FALSE
Aldh16a1	0.00430524	1	0.00985768	1	-0.0484706	1	-0.0513893	1	0.00898419	1	0.0103925	1	-0.0427494	1	-0.0324184	1	0.0673105	1	0.0505128	1	-0.0153425	0.0106096	1	1	FALSE
Aldh18a1	-0.0247764	1	-0.0699854	1	-0.0616517	1	-0.00291387	1	-0.0255896	1	0.00905705	1	-0.0194669	1	-0.00837671	1	0.0734036	1	0.0118641	1	-0.0369834	0.0132962	1	1	FALSE
Aldh2	-0.537308	4.01458e-18	-0.146508	1	-0.255107	1	-0.121892	1	-0.67494	1.18357e-54	-0.307482	0.0224735	-0.291577	1	-0.00264739	1	-0.378076	1	-0.408897	1	-0.347151	-0.277736	1.47587e-64	0.668734	FALSE
Aldh3a2	0.0771887	1	-0.0159566	1	0.138164	1	0.000290073	1	0.0163806	1	-0.00196239	1	0.0191124	1	-0.0370231	1	-0.0155964	1	-0.0520195	1	0.0432134	-0.0174978	1	1	FALSE
Aldh3b1	0.0168862	1	0.0157914	1	0.0755001	1	0.0370616	1	0.0116794	1	0.0420582	1	0.0309978	1	0.0562121	1	0.0570691	1	0.118813	1	0.0313838	0.06103	1	1	FALSE
Aldh5a1	-0.0180297	1	-0.0349104	1	-0.0056441	1	0.0529366	1	-0.0175337	0.171062	-0.00705617	1	-0.0147184	1	-0.044802	1	-0.00692989	1	-0.00571575	1	-0.00463625	-0.0158444	0.966019	1	FALSE
Aldh7a1	0.00540349	1	0.023344	1	-0.0552629	1	-0.0940674	1	-0.0560743	4.39289e-05	-0.0336901	1	-0.0219033	1	0.00912873	1	-0.0118315	1	-0.0556428	1	-0.0353314	-0.0227878	0.0286357	1	FALSE
Aldh9a1	-0.0510602	1	-0.11444	0.0885975	-0.0311867	1	-0.112309	1	-0.0846642	0.000970478	-0.033835	1	-0.0493411	1	-0.0470677	1	-0.0322001	1	-0.312622	1	-0.0787321	-0.0950131	0.0439289	1	FALSE
Aldoa	0.31432	1	0.332467	1	0.795763	1	0.292713	1	0.191429	1	0.19061	1	0.398121	1	0.467156	1	-0.259024	1	0.292626	1	0.385338	0.217898	1	1	FALSE
Aldoc	-0.00648255	1	0.187484	1	0.122581	1	-0.00818268	1	0.00556879	1	0.0036065	1	0.146903	1	0.0347014	1	0.00564024	1	0.0421641	1	0.0601936	0.046603	1	1	FALSE
Alg1	0.0206212	1	-0.00236794	1	0.0193381	1	-0.0238698	1	0.0325708	1	0.00384126	1	0.0262295	1	-0.00272477	1	0.0238603	1	0.0632195	1	0.00925848	0.0228852	1	1	FALSE
Alg10b	-0.0249456	1	-0.0490555	1	0.107781	1	-0.0841595	1	-0.00347076	1	-0.042756	1	0.0116772	1	0.00948184	1	-0.0196606	1	0.0314397	1	-0.0107702	-0.00196358	1	1	FALSE
Alg11	0.0210894	1	-0.0461607	1	0.000406943	1	0.0269849	1	-0.012147	1	0.00333559	1	0.0170555	1	0.0422246	1	-0.0261096	1	0.00576857	1	-0.00196531	0.00845491	1	1	FALSE
Alg13	-0.0327695	1	0.00533212	1	-0.00589338	1	-0.0533509	1	-0.0177479	1	-0.018426	1	-0.0187655	1	-0.0341696	1	-0.00148178	1	0.00399177	1	-0.0208859	-0.0137702	1	1	FALSE
Alg14	-0.00372076	1	-0.145157	0.579586	0.131018	1	-0.0303993	1	-0.0312899	1	-0.405659	1	0.00382637	1	-0.154811	1	-0.116266	1	0.0437481	1	-0.0159099	-0.125832	0.999744	1	FALSE
Alg2	0.0176839	1	-0.0186553	1	0.0185055	1	-0.0124427	1	0.00123977	1	-0.00574365	1	0.0355035	1	-0.00682941	1	-0.0134698	1	0.0213857	1	0.00126625	0.00616925	1	1	FALSE
Alg5	-0.0536657	1	0.00183271	1	-0.00687524	1	0.027528	1	-0.13482	0.000307912	0.079015	1	-0.0902923	1	-0.0673674	1	0.0574918	1	0.0711382	1	-0.0332	0.00999706	0.0948301	1	FALSE
Alg6	-0.0296758	1	-0.000720175	1	-0.0482509	1	-0.00824881	1	0.00393622	1	-0.0219691	1	-0.00554571	1	-0.0393118	1	0.000824622	1	0.0151548	1	-0.0165919	-0.0101694	1	1	FALSE
Alg8	0.0118111	1	0.0185938	1	0.000593318	1	0.0203094	1	0.00543606	1	0.0179435	1	-0.00391741	1	0.0233792	1	-0.0184156	1	-0.110629	1	0.0113488	-0.0183278	1	1	FALSE
Alg9	-0.0282612	1	-0.000707243	1	0.0182794	1	-0.0292212	1	-0.0246498	1	-0.00466119	1	0.00108119	1	-0.0827324	1	-0.00995028	1	0.0379673	1	-0.012912	-0.0116591	1	1	FALSE
Alkbh1	-0.0855131	1	-0.0886529	1	-0.0745773	1	0.0315259	1	-0.0412075	1	-0.00464403	1	0.0590701	1	-0.139631	1	0.158042	1	-0.0250863	1	-0.051685	0.0095502	1	1	FALSE
Alkbh2	-0.0412221	1	0.00275044	1	-0.02196	1	0.167723	1	-0.011849	1	0.0320505	1	0.0333328	1	0.0941182	1	0.0344322	1	0.040901	1	0.0190884	0.046967	1	1	FALSE
Alkbh3	-0.0501131	1	-0.0291324	1	-0.0763234	1	0.0858005	1	-0.0348169	1	-0.0129567	1	0.0410382	1	0.129786	1	0.0142498	1	0.0569717	1	-0.0209171	0.0458178	1	1	FALSE
Alkbh5	0.143565	1	0.34293	1	0.0574142	1	0.0108028	1	0.15626	0.0399988	0.0504569	1	-0.272069	1	-0.23386	1	-0.0877319	1	-0.457892	1	0.142194	-0.200219	0.777238	1	FALSE
Alkbh6	0.031118	1	0.0654815	1	0.0487748	1	0.117346	1	-0.00401667	1	-0.291065	1	0.0295774	1	0.08283	1	0.0828785	1	0.0131102	1	0.0517407	-0.0165337	1	1	FALSE
Alkbh7	-0.00977454	1	-0.00742601	1	0.146019	1	0.0698858	1	-0.0288486	1	0.00215639	1	0.0196167	1	-0.0122766	1	0.0297136	1	0.00582055	1	0.0339711	0.00900614	1	1	FALSE
Alkbh8	-0.0346898	1	-0.0535796	1	-0.0536513	1	0.0538412	1	-0.0556889	0.00665829	0.00713069	1	-0.0332793	1	-0.0142674	1	-0.0328348	1	0.0150233	1	-0.0287537	-0.0116455	0.438409	1	FALSE
Alms1	-0.0114508	1	-0.0450289	1	-0.0400968	1	-0.0514427	1	-0.0186506	1	0.0057919	1	0.00229254	1	0.0132636	1	-0.0629501	1	0.0330373	1	-0.033334	-0.00171294	1	1	FALSE
Alpk1	0.0080303	1	-0.0356787	1	-0.0267735	1	0.0311536	1	-0.0366985	9.43441e-05	-0.0723435	1	-0.0076552	1	-0.00182315	1	0.0325988	1	-0.0129538	1	-0.0119934	-0.0124354	0.0465514	1	FALSE
Als2cl	0.0117098	1	0.0233873	1	0.0263913	1	-0.0415758	1	0.0235504	1	-0.0216344	1	-0.124728	1	-0.0267973	1	0.0986411	1	-0.0450458	1	0.0086926	-0.023913	1	1	FALSE
Alyref	-0.17431	1	-0.160204	1	-0.158266	1	-0.0885879	1	-0.0318872	1	-0.308034	1	-0.165766	1	-0.16215	1	-0.0982596	1	-0.310921	1	-0.122651	-0.209026	1	1	FALSE
Alyref2	-0.00291413	1	-0.0495369	1	0.0117718	1	-0.054365	1	0.00569975	1	-0.0218398	1	0.0131731	1	-0.000143308	1	0.0371931	1	-0.00700751	1	-0.0178689	0.00427513	1	1	FALSE
Ambra1	0.00489411	1	-0.00544759	1	-0.045196	1	-0.0383695	1	-0.00212339	1	-0.000733894	1	-0.024652	1	-0.0382935	1	-0.0107963	1	0.011765	1	-0.0172485	-0.0125421	1	1	FALSE
Amd1	-0.0647985	1	-0.0482136	1	-0.160883	1	-0.0822643	1	-0.0550647	1	-0.0681597	1	-0.0394165	1	-0.198617	1	-0.0679085	1	-0.117343	1	-0.0822449	-0.0982888	1	1	FALSE
Amd2	0.0632798	1	0.0622341	1	-0.033098	1	0.0321626	1	0.0124594	1	-0.304905	4.11525e-08	-0.296222	0.0420503	-0.261839	1	-0.158951	1	-0.403918	0.142769	0.0274076	-0.285167	1	2.97702e-06	FALSE
Amer1	0.0719027	1	-0.0250689	1	0.0140763	1	-0.00748696	1	-0.0585348	1	0.0374984	1	-0.015667	1	0.00186627	1	0.0211957	1	-0.021694	1	-0.00102234	0.00463987	1	1	FALSE
Amfr	0.022094	1	0.0207373	1	0.00834349	1	0.309563	1	-0.0338389	1	-0.0900047	1	-0.0859176	1	-0.0629419	1	-0.179665	1	-0.0303545	1	0.0653798	-0.0897768	1	1	FALSE
Ammecr1	-0.0505701	1	-0.0660665	1	-0.0654488	1	0.0144057	1	-0.0325692	1	0.0256872	1	-0.00277915	1	-0.0281417	1	0.0126001	1	-0.0219782	1	-0.0400498	-0.00292235	1	1	FALSE
Ammecr1l	-0.0193773	1	-0.00238386	1	-0.0492401	1	-0.0340213	1	-0.0330925	1	-0.0670645	1	0.00857413	1	-0.0777501	1	-0.0129929	1	-0.0330513	1	-0.027623	-0.0364569	1	1	FALSE
Amn1	0.0569967	1	-0.0466758	1	-0.00569779	1	0.0431408	1	-0.0139705	1	0.00569586	1	0.0373219	1	0.0824542	1	0.0874477	1	0.083824	1	0.00675868	0.0593487	1	1	FALSE
Amot	0.014591	1	-0.0112687	1	-0.00831265	1	-0.0475185	1	-0.0450546	5.96113e-05	-0.0121436	1	-0.0130243	1	0.0481743	1	0.0224814	1	0.0116621	1	-0.0195127	0.01143	0.0348462	1	FALSE
Amotl1	0.14591	1	0.206815	1	0.0266658	1	0.047866	1	0.0984579	1	0.0776459	1	-0.000436305	1	-0.179247	1	0.237831	1	-0.503024	1	0.105143	-0.073446	1	1	FALSE
Amotl2	-0.0711168	0.0918743	-0.0038712	1	-0.0898784	1	0.0881548	1	-0.0450285	1	-0.0972664	0.0103955	-0.1161	1	-0.250755	1	-0.119129	1	-0.0695197	1	-0.024348	-0.130554	0.905713	0.519552	FALSE
Ampd2	-0.00620799	1	-0.0782304	1	0.0396321	1	-0.0394457	1	0.00147358	1	0.0538492	1	0.0241311	1	0.0133107	1	-0.0212219	1	0.0591621	1	-0.0165557	0.0258462	1	1	FALSE
Ampd3	0.0490874	1	0.00826134	1	0.0058942	1	-0.0627251	1	0.0291688	1	0.0759637	1	-0.032474	1	0.00846803	1	0.139223	1	-0.0251592	1	0.00593732	0.0332042	1	1	FALSE
Amz2	0.00287072	1	-0.066047	1	-0.115995	1	0.0623035	1	-0.0277775	1	-0.024463	1	-0.154102	1	0.0166266	1	-0.121511	1	0.0187665	1	-0.0289291	-0.0529366	1	1	FALSE
Anapc1	0.0240632	1	-0.0497642	1	0.00132947	1	0.0831685	1	0.0314454	1	0.0295081	1	-0.071007	1	-0.0773891	1	0.0677048	1	0.127273	1	0.0180485	0.0152179	1	1	FALSE
Anapc10	-0.0855556	0.297584	-0.0373539	1	-0.0400766	1	0.0752611	1	-0.0458564	0.807622	-0.173828	1	0.00963616	1	-0.0182767	1	0.114194	1	-0.084814	1	-0.0267163	-0.0306178	0.984707	1	FALSE
Anapc11	-0.0577377	1	-0.0117349	1	0.0942959	1	0.134158	1	-0.00278093	1	0.0519179	1	-0.014829	1	0.185089	1	-0.0704406	1	0.0214875	1	0.0312401	0.0346449	1	1	FALSE
Anapc13	0.224789	0.00231058	0.148968	1	0.423642	1	0.2736	1	0.138942	0.00304189	0.150667	1	0.0401133	1	0.139618	1	0.258368	1	0.304342	1	0.241988	0.178622	0.00834712	1	FALSE
Anapc15	-0.0347959	1	-0.0198253	1	0.0866438	1	0.0288363	1	0.0179812	1	0.0453378	1	0.0360779	1	0.0577906	1	-0.081328	1	0.0336013	1	0.015768	0.0182959	1	1	FALSE
Anapc16	0.0867998	1	0.164281	1	0.0610023	1	0.115576	1	0.0804845	1	0.0436372	1	0.136466	1	0.164614	1	-0.0207161	1	0.198406	1	0.101629	0.104482	1	1	FALSE
Anapc2	-0.0533201	1	0.0217521	1	-0.0556546	1	0.145089	1	-0.0728668	0.0369751	0.0283878	1	-0.00657221	1	-0.01241	1	-0.0756887	1	0.024848	1	-0.00300017	-0.00828703	0.763044	1	FALSE
Anapc4	0.0601969	1	-0.0644206	1	0.00568048	1	0.233363	1	0.0506163	1	-0.0184525	1	-0.089644	1	0.0836699	1	-0.104761	1	-0.199529	1	0.0570872	-0.0657435	1	1	FALSE
Anapc5	-0.106669	1	-0.0277754	1	0.00471644	1	0.055029	1	-0.236541	1.3494e-12	-0.0986125	1	-0.214096	1	-0.126394	1	0.0704167	1	-0.0109155	1	-0.062248	-0.0759202	3.65082e-08	1	FALSE
Anapc7	-0.0446639	1	-0.107276	0.485973	0.0478343	1	0.0392722	1	-0.0291352	1	-0.0825529	1	-0.0375325	1	-0.224943	1	-0.00200955	1	-0.0247846	1	-0.0187938	-0.0743646	0.999102	1	FALSE
Angel2	-0.0496743	1	-0.0896678	1	-0.202551	1	-0.119715	1	0.0290677	1	-0.0050531	1	-0.156229	1	0.0258526	1	0.0310825	1	0.104283	1	-0.0865082	-1.28265e-05	1	1	FALSE
Angpt2	-0.0365253	1	-0.0274733	1	0.00391611	1	-0.0612976	1	-0.0119162	1	0.0207438	1	0.0307896	1	0.0229402	1	-0.0199771	1	-0.00260626	1	-0.0266593	0.0103781	1	1	FALSE
Angptl2	0.222682	0.745415	0.0627902	1	0.333022	1	0.169163	1	0.224143	8.42222e-05	0.158101	0.0294849	0.0308089	1	0.150224	1	0.0277691	1	0.22904	1	0.20236	0.119189	0.036016	0.720929	FALSE
Angptl4	-0.046656	1	-0.0421155	1	0.022373	1	-0.0439168	1	0.125045	1	-0.0655215	1	0.00147213	1	-0.0346832	1	0.149586	1	-0.116733	1	0.00294599	-0.0131759	1	1	FALSE
Ank	-0.100697	1	0.206318	1	0.027206	1	-0.191681	1	-0.0672024	1	-0.0940384	1	-0.129819	1	-0.321311	1	0.0131058	1	-0.457475	1	-0.0252113	-0.197907	1	1	FALSE
Ank3	-0.230614	3.15951e-15	-0.210833	0.000841871	-0.270535	1	-0.169423	1	-0.225624	1.08227e-24	-0.101241	4.5009e-06	-0.138409	1	-0.076934	1	-0.0183062	1	-0.229993	0.0685387	-0.221406	-0.112977	1.04737e-35	0.000862085	FALSE
Ankfy1	-0.0284738	1	-0.0692892	1	-0.0376377	1	-0.065939	1	0.0373652	1	-0.0794726	1	-0.00814439	1	0.0496075	1	0.0457353	1	0.0730625	1	-0.0327949	0.0161576	1	1	FALSE
Ankhd1	0.0126801	1	-0.112944	1	-0.131279	1	-0.036929	1	-0.00124567	1	0.0841592	1	0.0208182	1	-0.0235527	1	0.144865	1	0.0135216	1	-0.0539435	0.0479624	1	1	FALSE
Ankib1	0.00851925	1	-0.0977301	1	-0.058326	1	-0.053539	1	-0.023519	1	0.00371902	1	-0.0209854	1	0.035215	1	0.0133297	1	-0.084867	1	-0.044919	-0.0107177	1	1	FALSE
Ankle2	-0.0232768	1	0.0283195	1	-0.189541	1	-0.0396628	1	-0.01036	1	0.0422353	1	-0.0283491	1	0.0585551	1	0.0829858	1	0.0896804	1	-0.0469043	0.0490215	1	1	FALSE
Ankmy1	0.0391805	1	0.196232	1	0.0135376	1	0.143843	1	0.0281374	1	-0.0176852	1	-0.0775721	1	-0.176614	1	-0.200064	1	-0.145949	0.0406664	0.0841861	-0.123577	1	0.780193	FALSE
Ankmy2	-0.0201541	1	0.0209184	1	-0.0786984	1	-0.00583303	1	-0.0362236	1	0.00354739	1	0.00977472	1	-0.0492051	1	-0.0492968	1	-0.0717472	1	-0.0239981	-0.0313854	1	1	FALSE
Ankra2	0.000691593	1	0.00600489	1	-0.0329368	1	-0.0102225	1	-0.0162263	1	-0.0159362	1	0.0168951	1	-0.0052538	1	-0.0180052	1	-0.0375013	1	-0.0105378	-0.0119603	1	1	FALSE
Ankrd1	-0.212721	0.320853	0.0787466	1	-0.187384	1	0.0653229	1	-0.0742777	1	-0.572835	0.577877	-0.526075	1	-0.594403	1	0.131608	1	-0.281191	1	-0.0660626	-0.368579	0.993781	0.999737	FALSE
Ankrd10	-0.0708918	1	-0.147714	1	-0.000730385	1	0.00589432	1	-0.074934	1	-0.159791	1	-0.074173	1	-0.0956896	1	-0.119808	1	0.00577142	1	-0.0576752	-0.0887382	1	1	FALSE
Ankrd11	-0.0292146	1	-0.117362	1	-0.171053	1	-0.243706	1	-0.0166337	1	-0.027397	1	-0.0952767	1	-0.353547	1	0.0803177	1	-0.0520275	1	-0.115594	-0.089586	1	1	FALSE
Ankrd12	0.348378	4.9489e-06	-0.144374	1	0.0724071	1	-0.124008	1	0.117379	1	0.258806	0.0181329	0.192614	0.853284	0.122692	1	-0.0465409	1	0.0155717	1	0.0539566	0.108628	0.0065311	0.595919	FALSE
Ankrd13a	0.00563648	1	-0.0121384	1	-0.0111031	1	0.0236149	1	-0.0126429	1	-0.00844971	1	-0.0127139	1	0.0348851	1	0.0387435	1	-0.00184634	1	-0.00132659	0.0101237	1	1	FALSE
Ankrd13b	-0.0183608	1	-0.0384767	1	-0.0416589	1	0.0280602	1	-0.054302	0.00074876	-0.28482	1	-0.18368	1	-0.0620298	1	-0.132977	1	-0.0989111	1	-0.0249476	-0.152483	0.155759	1	FALSE
Ankrd13c	-0.0266934	1	-0.0308733	1	-0.235279	1	-0.0378119	1	-0.0273069	1	-0.0162867	1	-0.196107	1	-0.122991	1	-0.221994	1	-0.0458516	1	-0.0715928	-0.120646	1	1	FALSE
Ankrd16	-0.0408909	1	-0.0698254	1	0.0190893	1	0.0839527	1	-0.0478966	1	0.000247324	1	0.0190686	1	0.0312153	1	0.00454421	1	-0.0227906	1	-0.0111142	0.00645696	1	1	FALSE
Ankrd17	-0.0382697	1	-0.18371	1	-0.307934	1	-0.210168	1	-0.146151	0.0219133	-0.077709	1	-0.109609	1	-0.119115	1	0.14807	1	0.111236	1	-0.177247	-0.00942536	0.663826	1	FALSE
Ankrd24	0.00112487	1	-0.00975046	1	0.0630622	1	-0.0140794	1	0.015197	1	-0.00476567	1	0.00144855	1	0.013034	1	0.0067948	1	0.0312093	1	0.0111109	0.0095442	1	1	FALSE
Ankrd26	-0.000784704	1	-0.0508535	1	-0.0761232	1	-0.0324052	1	0.0302566	1	0.0780232	1	0.0255551	1	-0.0661246	1	0.0312156	1	0.0251669	1	-0.025982	0.0187672	1	1	FALSE
Ankrd27	0.0120103	1	0.0726854	1	-0.0184574	1	0.00192748	1	-0.0310648	1	-0.0222667	1	0.000342164	1	0.0451522	1	-0.00440257	1	-0.0414232	1	0.00742021	-0.00451963	1	1	FALSE
Ankrd28	-0.0527459	1	-0.0479726	1	-0.0753724	1	-0.228107	1	-0.0751172	0.178995	-0.0199647	1	-0.0140992	1	-0.155916	1	-0.127682	1	0.0282897	1	-0.0958631	-0.0578743	0.96907	1	FALSE
Ankrd33b	-0.0525181	1	0.0713209	1	-0.0214887	1	-0.0160701	1	-0.0490755	1	0.0189354	1	0.0337281	1	-0.0318961	1	0.0472856	1	-0.0990357	1	-0.0135663	-0.00619653	1	1	FALSE
Ankrd37	0.319778	1	-0.158368	1	0.773679	1	0.182463	1	0.234368	1	0.141368	1	0.0053032	1	0.0358259	1	0.19571	1	-0.0125053	1	0.270384	0.0731405	1	1	FALSE
Ankrd39	-0.0427103	0.192766	-0.0250557	1	-0.0515989	1	-0.0161034	1	-0.0311644	1	0.0181672	1	0.00820747	1	0.022386	1	-0.0135	1	-0.00471183	1	-0.0333265	0.00610977	0.973677	1	FALSE
Ankrd40	-0.00242099	1	0.0466168	1	-0.0606625	1	-0.198993	1	-0.0589777	0.260431	-0.0592498	1	-0.0781823	1	-0.0508979	1	0.130909	1	-0.0519393	1	-0.0548874	-0.021872	0.987793	1	FALSE
Ankrd46	0.0011705	1	0.0189623	1	-0.0476809	1	0.280513	1	-0.0315731	0.372271	0.0120143	1	-0.0141874	1	0.0514356	1	0.006142	1	-0.0111924	1	0.0442783	0.00884242	0.996519	1	FALSE
Ankrd49	0.0220888	1	0.0218489	1	0.065824	1	0.0352279	1	-1.95823e-05	1	0.000801101	1	0.0121051	1	0.0141134	1	0.0212809	1	-0.0180779	1	0.028994	0.00604451	1	1	FALSE
Ankrd50	-0.0307078	1	-0.0170735	1	0.0144098	1	0.098314	1	-0.0155127	1	0.045923	1	-0.0326154	1	-0.0632851	1	0.0342182	1	-0.0886882	1	0.00988597	-0.0208895	1	1	FALSE
Ankrd52	0.00875147	1	-0.082737	1	-0.0911298	1	-0.0489209	1	-0.0328242	0.17027	0.00455114	1	-0.0199381	1	0.0374569	1	0.00556253	1	0.0101315	1	-0.0493721	0.0075528	0.965697	1	FALSE
Ankrd54	0.00885454	1	-0.0136058	1	0.0746382	1	0.0853424	1	-0.00332886	1	0.00288153	1	-0.0470369	1	0.391205	1	0.128491	1	0.0902596	1	0.0303801	0.11316	1	1	FALSE
Ankrd9	0.175041	0.231861	0.114126	1	0.170224	1	0.0121386	1	0.25572	2.46752e-15	0.177132	0.0133203	0.152184	0.0294851	0.0255143	1	0.0453288	1	-0.0415215	1	0.14545	0.0717276	4.0667e-11	0.109022	FALSE
Anks1	0.0211196	1	-0.0144249	1	-0.0648057	1	-0.0475477	1	-0.0110258	1	0.000207809	1	-0.00911954	1	-0.0223632	1	0.0104422	1	-0.032873	1	-0.0233369	-0.0107412	1	1	FALSE
Anks3	0.0463074	1	0.002629	1	-0.0192775	1	-0.0718607	1	-0.0137425	1	0.0188127	1	-0.00881172	1	0.00941945	1	0.0693843	1	0.0954861	1	-0.0111889	0.0368582	1	1	FALSE
Ankzf1	0.00889417	1	-0.0224008	1	0.0114975	1	-0.0592999	1	-0.0299044	1	0.00406004	1	-0.000463171	1	0.00216682	1	-0.0268413	1	0.130673	1	-0.0182427	0.0219191	1	1	FALSE
Anln	-0.0470531	1	-0.0536694	1	0.0380549	1	-0.122824	1	0.226359	0.00710433	0.102424	1	-0.0088564	1	-0.153775	1	0.233006	1	0.216746	1	0.00817352	0.0779091	0.449833	1	FALSE
Ano1	0.061312	1	0.155877	1	0.0869063	1	0.281339	1	0.162954	9.9042e-05	0.0586377	1	0.037779	1	-0.0463692	1	0.0936989	1	-0.000237621	1	0.149678	0.0287018	0.0479808	1	FALSE
Ano10	0.013306	1	0.0210776	1	-0.0404316	1	0.0761571	1	-0.105147	1.13185e-08	-0.0256403	1	-0.0660034	1	-0.0334258	1	-0.275709	1	0.0151029	1	-0.00700757	-0.077135	6.65224e-05	1	FALSE
Ano4	-0.0687793	1	-0.032386	1	-0.00138715	1	0.0149455	1	0.0349012	1	0.0422315	1	-0.139661	1	-0.00614554	1	-0.0112575	1	-0.0234652	1	-0.0105412	-0.0276596	1	1	FALSE
Ano6	-0.0287721	1	-0.0290891	1	-0.182471	1	-0.0172692	1	0.0415545	1	0.060768	1	0.0157993	1	-0.146086	1	0.164238	1	-0.114737	1	-0.0432094	-0.00400355	1	1	FALSE
Ano8	0.0837161	1	0.0170062	1	0.0302194	1	-0.0915121	1	0.0587424	1	-0.0365705	1	-0.0381931	1	-0.240394	1	0.0343519	1	-0.135192	1	0.0196344	-0.0831997	1	1	FALSE
Anp32a	-0.4011	4.35724e-13	-0.126372	1	-0.183764	1	-0.022495	1	-0.269675	7.88411e-19	-0.104337	1	-0.190051	1	-0.242293	1	0.172416	1	0.00941971	1	-0.200681	-0.0709692	3.67181e-25	1	FALSE
Anp32b	-0.271113	0.0840682	-0.274969	0.359495	-0.131805	1	-0.201043	1	-0.107623	1	-0.126038	1	-0.23565	1	-0.0984663	1	-0.0751187	1	0.135658	1	-0.19731	-0.079923	0.725599	1	FALSE
Anp32e	-0.152488	0.0924048	-0.0823221	1	0.0184515	1	-0.0237975	1	-0.0963487	1	-0.139104	1	-0.0832593	1	-0.151981	1	-0.234157	1	0.0658784	1	-0.067301	-0.108525	0.906428	1	FALSE
Antxr2	-0.0727383	1	-0.0682872	1	-0.212396	1	0.292828	1	-0.0980087	1	-0.0425558	1	-0.108211	1	-0.0716787	1	-0.264484	1	-0.314234	1	-0.0317203	-0.160233	1	1	FALSE
Anxa1	-0.0399399	1	0.297034	1	0.358857	1	-0.467429	1	-0.115488	1	0.0501122	1	-0.105862	1	0.0246646	1	-0.470208	1	0.127592	1	0.00660671	-0.0747401	1	1	FALSE
Anxa11	0.226467	0.000443375	0.0754442	1	-0.0117854	1	-0.00732759	1	0.29507	8.11129e-18	0.0629433	1	-0.018696	1	0.0572229	1	0.129016	1	-0.0854668	1	0.115574	0.029004	8.02532e-16	1	FALSE
Anxa2	-7.30077e-05	1	0.463936	0.000665385	0.669986	1	0.218514	1	0.136412	1	0.220457	1	0.222595	1	0.142239	1	-0.0840006	1	0.0834593	1	0.297755	0.11695	0.146133	1	FALSE
Anxa3	-0.400772	8.01121e-10	-0.276427	1	-0.304984	1	-0.27321	1	-0.43867	7.68812e-21	-0.473723	5.40138e-05	-0.262252	1	-0.0862697	1	-0.786804	1	-0.394468	1	-0.338813	-0.400703	5.57869e-24	0.0327157	TRUE
Anxa4	0.11104	1	-0.0603259	1	-0.0767263	1	-0.0198355	1	0.0201753	1	0.0040993	1	-0.0694622	1	-0.164335	1	-0.315465	1	-0.190639	1	-0.00513441	-0.14716	1	1	FALSE
Anxa5	-0.257758	0.000182044	0.189649	1	-0.0446804	1	-0.254134	1	-0.258244	3.22041e-11	-0.321587	0.0635633	0.00738959	1	-0.13688	1	-0.532717	1	-0.415012	1	-0.125034	-0.279761	3.19434e-10	0.854506	FALSE
Anxa6	-0.357325	4.92464e-21	-0.1355	1	-0.0662865	1	0.0413168	1	-0.478451	1.13348e-65	-0.263482	0.000117412	-0.186853	1	-0.0873954	1	-0.27673	1	-0.318075	1	-0.199249	-0.226507	3.52515e-78	0.053306	FALSE
Anxa7	0.0274943	1	0.116919	1	-0.0499715	1	-0.0106046	1	-0.0134172	1	0.0837949	1	0.0149715	1	0.00131425	1	-0.031395	1	0.196661	1	0.0140839	0.0530693	1	1	FALSE
Anxa9	0.0146802	1	0.0217784	1	0.000476372	1	-0.0191167	1	0.0115528	1	-0.00406237	1	0.0188751	1	0.0233167	1	0.0242046	1	-0.0265595	1	0.00587424	0.00715491	1	1	FALSE
Aox1	-0.0513612	0.0186734	-0.00524893	1	-0.0568268	1	-0.0569492	1	-0.0722146	6.80849e-12	-0.00877706	1	0.00706667	1	0.00563159	1	-0.0451713	1	-0.0792084	1	-0.0485202	-0.0240917	4.73293e-09	1	FALSE
Ap1ar	0.000861461	1	-0.110665	1	-0.110751	1	-0.282769	1	-0.0226713	1	0.0167105	1	0.0199879	1	-0.0554377	1	-0.197301	1	-0.0164356	1	-0.105199	-0.0464951	1	1	FALSE
Ap1b1	0.0639538	1	-0.0195835	1	0.00388396	1	0.0287885	1	0.0570122	1	0.010219	1	0.0187719	1	-0.0487332	1	0.0529009	1	-0.0384871	1	0.026811	-0.0010657	1	1	FALSE
Ap1g1	-0.0441252	1	-0.0964262	1	-0.0271786	1	-0.0436428	1	-0.0600725	1	-0.129841	1	-0.0220925	1	0.0123934	1	0.021775	1	-0.0791568	1	-0.0542891	-0.0393843	1	1	FALSE
Ap1g2	-0.0081936	1	-0.037819	1	-0.0177147	1	0.0383453	1	-0.000151297	1	0.013197	1	-0.0112935	1	0.000852362	1	-0.0312882	1	0.0342501	1	-0.00510665	0.00114354	1	1	FALSE
Ap1m1	0.105446	1	0.0160109	1	0.0978679	1	0.100408	1	0.0599097	1	0.100106	1	-0.166045	1	0.128083	1	0.243766	1	0.0629904	1	0.0759285	0.0737802	1	1	FALSE
Ap1s1	0.0133673	1	-0.0130274	1	0.049215	1	0.276546	1	-0.0313892	1	0.194874	1	0.084784	1	0.235268	1	-0.179828	1	0.0702596	1	0.0589423	0.0810715	1	1	FALSE
Ap1s2	0.0470743	1	0.0227629	1	0.016863	1	-0.104035	1	0.00509502	1	-0.0361251	1	0.0170753	1	-0.160931	1	-0.108631	1	0.021341	1	-0.00244791	-0.0534543	1	1	FALSE
Ap1s3	-0.0137376	1	-0.0119577	1	0.00118674	1	-0.00995211	1	-0.00248114	1	-0.0337948	1	0.00164166	1	-0.0630352	1	-0.039153	1	-0.00397255	1	-0.00738835	-0.0276628	1	1	FALSE
Ap2a1	0.00705717	1	-0.0650473	1	0.0751445	1	-0.0691738	1	0.0529992	1	0.0785911	1	-0.190416	1	0.00440268	1	-0.269638	1	-0.0583553	1	0.000195961	-0.0870832	1	1	FALSE
Ap2a2	0.00656432	1	0.00581693	1	0.0278794	1	0.03379	1	-0.036886	1	-0.185566	1	-0.181467	1	-0.116183	1	-0.135583	1	-0.18732	1	0.00743293	-0.161224	1	1	FALSE
Ap2b1	0.0223777	1	-0.0735992	1	0.0502444	1	-0.00470112	1	-0.0425837	1	-0.156414	1	-0.318828	1	-0.148354	1	0.0441424	1	-0.273952	1	-0.00965238	-0.170681	1	1	FALSE
Ap2m1	-0.0484544	1	0.0470302	1	0.119313	1	0.138716	1	-0.0201009	1	0.0122088	1	0.0237052	1	0.195737	1	0.0479858	1	0.0857675	1	0.0473006	0.073081	1	1	FALSE
Ap2s1	-0.0942382	1	0.0734682	1	0.145094	1	0.408563	1	0.000446637	1	-0.0452516	1	0.0454716	1	0.139085	1	0.101542	1	0.0789376	1	0.106667	0.0639569	1	1	FALSE
Ap3b1	-0.0485131	1	-0.0807419	1	-0.160636	1	-0.0659995	1	-0.0588073	1	-0.00181464	1	-0.00825696	1	-0.148069	1	0.0888723	1	-0.14946	1	-0.0829397	-0.0437455	1	1	FALSE
Ap3d1	0.0344922	1	-0.113492	1	-0.143114	1	-0.0493648	1	0.068522	1	-0.0501164	1	-0.0401453	1	-0.154947	1	-0.0555263	1	0.022969	1	-0.0405912	-0.0555532	1	1	FALSE
Ap3m1	0.00677129	1	-0.0552387	1	-0.0697549	1	-0.166739	1	0.0157561	1	0.0120087	1	-0.00828338	1	-0.00832129	1	0.0296682	1	-0.0171892	1	-0.0538411	0.0015766	1	1	FALSE
Ap3m2	0.00626086	1	-0.0177212	1	0.0656251	1	0.00893612	1	0.00600308	1	0.014032	1	0.0335985	1	-0.0181094	1	0.0611247	1	0.0204138	1	0.0138208	0.0222119	1	1	FALSE
Ap3s1	-0.0722712	1	0.0713744	1	-0.0305517	1	-0.0303342	1	-0.152888	0.000308057	-0.0954106	1	-0.0202412	1	-0.0625479	1	-0.663177	1	0.0658452	1	-0.0429341	-0.155106	0.0948558	1	FALSE
Ap3s2	-0.0470021	1	0.0765732	1	-0.00432278	1	-0.0211662	1	-0.0222101	1	-3.9551e-05	1	-0.0720755	1	0.105122	1	0.0739254	1	-0.123157	1	-0.00362559	-0.0032451	1	1	FALSE
Ap4b1	0.010533	1	0.0358322	1	0.0300915	1	0.0160827	1	0.00629438	1	-0.0208738	1	-0.0175	1	-0.0518313	1	-0.033265	1	0.0155537	1	0.0197667	-0.0215833	1	1	FALSE
Ap4m1	-0.0900236	1	-0.078867	1	-0.0935607	1	-0.13512	1	-0.0870793	1.45417e-05	-0.0593969	0.0428574	-0.0789162	1	-0.0450137	1	-0.0238512	1	-0.0604132	1	-0.0969302	-0.0535182	0.0137541	0.789482	FALSE
Ap4s1	-0.0440091	1	-0.0705286	1	0.0688921	1	-0.00303797	1	-0.0178082	1	0.0526539	1	0.0377359	1	-0.0701689	1	0.0366144	1	0.0531486	1	-0.0132984	0.0219968	1	1	FALSE
Ap5m1	0.00985822	1	0.000673877	1	-0.0463615	1	-0.0298044	1	-0.010291	1	0.00379836	1	0.0143179	1	-0.00272566	1	-0.00351717	1	-0.00237759	1	-0.0151849	0.00189917	1	1	FALSE
Ap5s1	0.00285017	1	0.0584028	1	0.0210106	1	-0.00510333	1	0.0117385	1	0.0276157	1	0.00282928	1	0.0153146	1	-0.0564127	1	-0.00265334	1	0.0177797	-0.00266129	1	1	FALSE
Ap5z1	0.0167316	1	0.0362416	1	0.000145479	1	-0.0349007	1	0.00566613	1	0.0282032	1	-0.0413536	1	0.0084945	1	-0.0319927	1	0.0239589	1	0.0047768	-0.00253793	1	1	FALSE
Apaf1	-0.0720854	0.261083	-0.0593641	1	-0.106164	1	-0.093905	1	-0.107701	4.73956e-07	-0.061484	1	-0.0780987	1	-0.0311321	1	-0.0230142	1	-0.0344653	1	-0.087844	-0.0456388	0.000430672	1	FALSE
Apba3	0.0155485	1	-0.0108463	1	0.00819553	1	-0.161468	1	-0.00146459	1	0.00578408	1	-0.0124395	1	0.0325418	1	-0.108836	1	-0.0111463	1	-0.0300069	-0.0188192	1	1	FALSE
Apbb1	-0.0208038	1	-0.00110839	1	0.00962827	1	-0.000310754	1	-0.0500463	1.05055e-07	0.040409	1	0.0817615	1	0.0158889	1	0.0197408	1	-0.00307495	1	-0.0125282	0.0309451	0.000379838	1	FALSE
Apbb1ip	-0.0196654	1	0.000721183	1	0.0404796	1	0.046108	1	0.00365906	1	0.15469	1	0.112024	1	0.0728271	1	0.0903851	1	-0.0259709	1	0.0142605	0.080791	1	1	FALSE
Apbb2	-0.0132925	1	0.0619927	1	-0.132723	1	0.195736	1	0.0193009	1	-0.0832927	1	0.083711	1	-0.0980433	1	0.102038	1	-0.2483	1	0.0262028	-0.0487774	1	1	FALSE
Apc	-0.00218647	1	-0.172389	0.0596589	-0.191176	1	-0.0863896	1	-0.0124221	1	-0.0145354	1	0.0287975	1	-0.0616453	1	0.142648	1	0.00950655	1	-0.0929128	0.0209543	0.844687	1	FALSE
Apeh	-0.00192405	1	-0.0389573	1	-0.00231132	1	-0.0598515	1	0.0164263	1	-0.0246222	1	0.0665936	1	-0.0162485	1	-0.100085	1	-0.00727471	1	-0.0173236	-0.0163274	1	1	FALSE
Apex1	-0.183656	0.0147177	-0.0849646	1	-0.00628396	1	-0.167451	1	-0.0710301	1	-0.0872601	1	-0.0596879	1	0.0717379	1	-0.00807353	1	0.0737012	1	-0.102677	-0.00191648	0.586192	1	FALSE
Apex2	-0.0174792	1	-0.0502036	0.0129834	-0.000489229	1	-0.0227118	1	-0.0383906	1	-0.0368136	1	0.00174866	1	-0.0215197	1	-0.0109078	1	-0.0242606	1	-0.0258549	-0.0183506	0.561932	1	FALSE
Aph1a	-0.0358824	1	0.0638792	1	0.111601	1	0.0368504	1	-0.0370687	1	-0.0383736	1	-0.0593738	1	0.0474275	1	-0.0375122	1	-0.0426876	1	0.0278758	-0.026104	1	1	FALSE
Api5	0.0382146	1	-0.105641	1	-0.166628	1	0.0990734	1	-0.00951856	1	-0.266504	1	0.00259616	1	-0.178454	1	-0.221182	1	-0.107733	1	-0.0288998	-0.154255	1	1	FALSE
Apip	-0.0318377	1	-0.0874121	1	0.00761174	1	-0.0375143	1	-0.0432803	0.633648	0.0288944	1	-0.105596	1	-0.107115	1	0.0525975	1	-0.0283275	1	-0.0384865	-0.0319093	0.999887	1	FALSE
Aplf	0.013969	1	-0.00926941	1	0.0479226	1	-0.0355146	1	-0.00235936	1	0.0109695	1	0.00295291	1	-0.00620782	1	0.011844	1	-0.000598833	1	0.00294964	0.00379196	1	1	FALSE
Apln	-0.030968	0.274865	-0.102533	0.303255	-0.0684797	1	0.078409	1	-0.0633048	1.72102e-08	0.0128664	1	0.00477062	1	-0.0917286	1	-0.043978	1	-0.0911369	1	-0.0373752	-0.0418413	1.26225e-05	1	FALSE
Aplp2	0.298436	9.44433e-05	0.334126	0.054131	0.121479	1	0.451732	1	0.153156	0.524587	0.149558	1	0.303813	1	0.290888	1	0.43258	1	0.0422641	1	0.271786	0.243821	0.00422842	1	FALSE
Apmap	-0.00105977	1	0.0189546	1	-0.00435631	1	0.146006	1	0.00030933	1	0.016295	1	0.0471602	1	-0.00312946	1	0.0674553	1	0.0369885	1	0.0319708	0.0329539	1	1	FALSE
Apobec3	-0.158831	4.96752e-11	-0.127297	0.073302	-0.102084	1	-0.127294	1	-0.118958	1.9198e-11	-0.0351574	1	-0.0800239	1	0.0102291	1	0.137993	1	-0.0789723	1	-0.126893	-0.00918623	2.13697e-17	1	FALSE
Apobr	0.0854847	1	-0.0322093	1	-0.040047	1	0.0687817	1	-0.0247563	1	-0.0187221	1	-0.147313	1	0.0702485	1	-0.0428406	1	0.0155426	1	0.0114507	-0.024617	1	1	FALSE
Apoe	-0.0445911	1	0.29007	1	-0.19165	1	0.169922	1	-0.00275578	1	0.175348	1	-0.267147	1	0.314145	1	0.143077	1	0.136097	1	0.044199	0.100304	1	1	FALSE
Apol10b	-0.102437	8.52809e-14	-0.104606	0.0323144	-0.144239	1	0.0706062	1	-0.103907	3.2006e-30	-0.176643	4.38465e-09	-0.10902	1	-0.106761	1	-0.0429415	1	-0.10063	1	-0.0769167	-0.107199	4.04935e-38	3.11713e-05	FALSE
Apol9a	-0.474473	1.26094e-31	-0.0701672	1	-0.676443	0.0382923	-0.278703	1	-0.544442	5.20168e-66	-0.281397	1.42682e-05	-0.329098	1	-0.368085	1	0.169845	1	-0.115495	1	-0.408846	-0.184846	2.71747e-90	0.0135781	FALSE
Apol9b	-0.461312	2.06477e-33	-0.122069	1	-0.445215	0.0577329	-0.232578	1	-0.505539	1.01343e-66	-0.249609	0.0062975	-0.261245	1	-0.135412	1	-0.0652148	1	-0.142879	1	-0.353342	-0.170872	1.43515e-92	0.428712	FALSE
Apoo	-0.135924	3.06268e-05	-0.136884	1	-0.0908342	1	0.0649275	1	-0.135833	3.42337e-10	0.0357023	1	-0.0313378	1	-0.112721	1	-0.159813	1	-0.0262978	1	-0.0869097	-0.0588934	5.33054e-10	1	FALSE
Apool	-0.110091	1.69719e-08	-0.0473758	1	-0.0450909	1	0.109621	1	-0.129277	1.1354e-10	0.0324548	1	-0.025915	1	-0.162855	1	0.0573064	1	-0.109714	1	-0.0444426	-0.0417446	2.45764e-13	1	FALSE
Apopt1	-0.123041	0.780757	0.0461427	1	-0.01804	1	-0.118841	1	-0.106146	1.80528e-06	0.0269769	1	0.0539713	1	0.157762	1	-0.0127511	1	0.0927248	1	-0.063985	0.0637368	0.00265744	1	FALSE
App	-0.026594	1	0.110824	1	0.121016	1	0.316473	1	0.0195205	1	-0.121396	1	-0.15136	1	-0.0281488	1	0.0696969	1	-0.0399692	1	0.108248	-0.0542353	1	1	FALSE
Appbp2	-0.064603	1	0.000914264	1	-0.0985743	1	-0.032743	1	-0.003958	1	-0.113775	1	-0.0233709	1	-0.153394	1	0.0912798	1	0.0909455	1	-0.0397928	-0.0216629	1	1	FALSE
Appl1	0.0263993	1	-0.043206	1	-0.19889	1	-0.10795	1	-0.013873	1	0.0535944	1	0.113052	1	0.0675576	1	0.229866	1	0.0749538	1	-0.0675041	0.107805	1	1	FALSE
Appl2	-0.000475053	1	0.00803227	1	-0.0486468	1	-0.0732692	1	0.0322445	1	0.0253357	1	-0.00643011	1	0.0538105	1	0.021507	1	-0.053857	1	-0.0164229	0.00807323	1	1	FALSE
Aprt	-0.0872511	1	-0.130687	1	0.0759906	1	0.024925	1	-0.024566	1	0.228647	1	0.092914	1	0.298092	1	-0.258505	1	0.284258	1	-0.0283177	0.129081	1	1	FALSE
Aptx	0.0267879	1	0.00784247	1	0.0311389	1	-0.0632072	1	-0.0329994	1	0.00533689	1	-0.0574098	1	-0.0519392	1	0.0334917	1	0.0698207	1	-0.00608747	-0.000139932	1	1	FALSE
Aqr	0.0463919	1	-0.0960629	1	0.0829471	1	-0.258622	1	-0.0682282	1	-0.170922	1	-0.0874089	1	-0.097857	1	0.0687255	1	0.0149959	1	-0.0587148	-0.0544933	1	1	FALSE
Araf	0.0405249	1	0.0188245	1	0.00544709	1	0.148495	1	0.00137001	1	-0.0713051	1	-0.0269064	1	-0.0456283	1	-0.0830477	1	-0.0875434	1	0.0429322	-0.0628862	1	1	FALSE
Arap1	-0.00569184	1	0.00021463	1	-0.0333648	1	0.00706131	1	-0.00836653	1	0.0147842	1	-0.00966533	1	0.0226359	1	-0.012426	1	-0.0455664	1	-0.00802944	-0.00604754	1	1	FALSE
Arap2	0.0666038	1	-0.0161464	1	0.116176	1	0.135172	1	0.195184	0.00187161	0.0479288	1	-0.0337089	1	-0.0915029	1	0.197909	1	0.0524735	1	0.0993978	0.0346199	0.249207	1	FALSE
Arcn1	-0.0486084	1	-0.207302	0.731612	-0.145484	1	-0.120908	1	-0.112956	0.00193207	0.0743697	1	0.010764	1	0.00109769	1	0.147691	1	0.0474144	1	-0.127052	0.0562673	0.216858	1	FALSE
Areg	0.623379	0.018895	0.363597	1	0.280137	1	0.356021	1	0.333361	0.00330776	0.406702	1	0.411151	0.197353	0.0164276	1	0.433269	1	0.0430185	1	0.391299	0.262114	0.0359135	0.975041	FALSE
Arel1	0.00943482	1	-0.00798267	1	-0.00949093	1	0.136059	1	0.00583701	1	-0.0167459	1	-0.00863259	1	-0.0651632	1	0.065699	1	-0.0158081	1	0.0267715	-0.00813015	1	1	FALSE
Arf1	-0.207828	2.99158e-08	-0.0734988	1	-0.0733053	1	0.10973	1	-0.196678	1.45011e-14	-0.19121	0.812101	-0.0556628	1	-0.175928	1	-0.0470344	1	-0.28188	1	-0.088316	-0.150343	1.14975e-16	0.999997	FALSE
Arf2	0.0438468	1	0.0515864	1	0.044051	1	-0.0865184	1	0.0211018	1	-0.0504456	1	0.0492559	1	-0.0637556	1	-0.0423608	1	0.0830568	1	0.0148135	-0.00484985	1	1	FALSE
Arf3	-0.0328705	1	0.0749067	1	0.0173502	1	0.05762	1	-0.0381156	1	-0.204159	1	0.0570812	1	-0.0421554	1	0.112693	1	-0.0759684	1	0.0157782	-0.0305017	1	1	FALSE
Arf4	-0.169426	0.0308881	-0.109314	1	-0.251893	1	-0.019447	1	-0.248866	1.0774e-14	-0.247824	1	-0.0401218	1	-0.401099	1	-0.332336	1	-0.178834	1	-0.159789	-0.240043	2.51039e-11	1	FALSE
Arf5	-0.153193	0.066487	0.0222055	1	0.0229662	1	0.117113	1	-0.103598	0.0178233	0.0275126	1	-0.0337978	1	0.0189701	1	0.179319	1	-0.116606	1	-0.0189012	0.0150795	0.198262	1	FALSE
Arf6	-0.128741	0.0753324	0.0128053	1	0.00975513	1	-0.139731	1	-0.0927873	0.0631801	-0.0574443	1	-0.134852	1	-0.377338	1	-0.260437	1	-0.108278	1	-0.0677398	-0.18767	0.381751	1	FALSE
Arfgap1	-0.0165716	1	-0.0432881	1	0.0130963	1	-0.0192363	1	-0.00146645	1	-0.0210645	1	-0.0507565	1	-0.156924	1	0.00264443	1	-0.131969	1	-0.0134932	-0.071614	1	1	FALSE
Arfgap2	-0.0128678	1	-0.0576861	1	-0.0182212	1	0.00308537	1	-0.0385499	1	0.00703483	1	-0.104823	1	-0.0690089	1	0.0244099	1	0.0162172	1	-0.0248479	-0.0252339	1	1	FALSE
Arfgap3	-0.00215259	1	-0.0378275	1	-0.0270593	1	0.00685365	1	-0.0309439	1	0.0103254	1	0.0262633	1	-0.000727524	1	-0.0269311	1	-0.0188074	1	-0.0182259	-0.00197549	1	1	FALSE
Arfgef1	0.067916	1	0.0254775	1	-0.0970255	1	0.00580817	1	-0.0323699	1	0.103645	1	0.015877	1	-0.0564535	1	0.15633	1	0.0899695	1	-0.00603874	0.0618735	1	1	FALSE
Arfgef2	0.0313259	1	0.0131557	1	-0.0349774	1	0.0182682	1	0.0222809	1	0.0213026	1	-0.123431	1	-0.0297118	1	-0.00646704	1	-0.0038308	1	0.0100107	-0.0284277	1	1	FALSE
Arfip1	0.0163026	1	-0.0114444	1	-0.0878905	1	0.0194245	1	-0.0136948	1	-0.059951	1	0.00489643	1	-0.00162465	1	-0.0706906	1	-0.0223718	1	-0.0154605	-0.0299483	1	1	FALSE
Arfip2	0.0426562	1	0.0433819	1	0.0243541	1	0.0356217	1	0.0277676	1	0.07994	1	-0.131201	1	0.0401788	1	0.126803	1	-0.0538948	1	0.0347563	0.0123652	1	1	FALSE
Arfrp1	0.0123393	1	0.0368062	1	0.0899204	1	0.112909	1	-0.0101844	1	0.0953963	1	-0.0713857	1	-0.0388181	1	0.181059	1	0.0979504	1	0.0483582	0.0528404	1	1	FALSE
Arg1	0.0138397	0.618445	0.0493826	1	-0.033719	1	0.01385	1	0.016382	0.00383388	0.250663	1	0.128801	1	0.00484595	1	0.118849	1	0.106408	1	0.0119471	0.121913	0.279154	1	FALSE
Arg2	-0.0099513	1	0.00800495	1	0.0289794	1	-0.000886947	1	-0.013159	1	-0.0148449	1	-0.0131274	1	0.0125507	1	-0.0287781	1	-0.0253785	1	0.00259742	-0.0139156	1	1	FALSE
Arglu1	-0.152144	0.0404567	-0.443251	4.47168e-06	-0.424711	1	-0.164861	1	-0.205024	6.42876e-07	-0.126919	1	-0.419469	1	-0.338717	1	-0.409354	1	-0.34963	1	-0.277998	-0.328818	4.37987e-09	1	FALSE
Arhgap1	-0.0179519	1	0.00237365	1	0.0364992	1	0.0382895	1	-0.0256726	1	0.0347629	1	0.0235758	1	-0.0114487	1	-0.0766826	1	-0.011906	1	0.00670759	-0.00833973	1	1	FALSE
Arhgap10	0.125966	1	0.00424311	1	-0.0293406	1	0.000921604	1	0.0161995	1	-0.0583005	1	0.0152627	1	0.0327885	1	0.13891	1	0.0306545	1	0.023598	0.0318631	1	1	FALSE
Arhgap11a	0.00312073	1	0.00993804	1	0.106739	1	-0.0871517	1	0.00404216	1	0.0766584	1	-0.0821807	1	-0.0110929	1	0.0275882	1	0.0286949	1	0.0073377	0.00793358	1	1	FALSE
Arhgap12	-0.0124524	1	-0.0108597	1	-0.0622643	1	-0.0805667	1	-0.0262199	1	0.0534133	1	-0.00409899	1	-0.0851824	1	0.0309787	1	0.0448611	1	-0.0384726	0.00799433	1	1	FALSE
Arhgap17	0.0475566	1	-0.0369376	1	0.026636	1	-0.0805301	1	-0.0320108	1	0.0410505	1	0.0346397	1	-0.077861	1	0.0574855	1	-0.0181701	1	-0.0150572	0.00742893	1	1	FALSE
Arhgap18	0.125846	1	0.0352644	1	-0.0870843	1	0.0487457	1	0.0661198	1	0.0690493	1	0.215777	0.0806243	0.148056	1	0.203448	1	0.0857142	1	0.0377782	0.144409	1	0.888766	FALSE
Arhgap19	-0.00575138	1	-0.015749	1	-0.0428406	1	-0.0142317	1	-0.00230681	1	0.0369304	1	0.0246045	1	0.00350626	1	0.0173108	1	0.0482267	1	-0.0161759	0.0261157	1	1	FALSE
Arhgap21	-0.0297742	1	0.00113763	1	-0.0317357	1	0.0100427	1	-0.0325476	1	0.0371549	1	-0.0267818	1	-0.140335	1	-0.113892	1	0.0274538	1	-0.0165754	-0.0432799	1	1	FALSE
Arhgap22	-0.176882	0.00389732	-0.0758238	1	-0.131199	1	-0.0675822	1	-0.406116	1.10469e-29	-0.232121	0.419661	-0.231226	1	-0.208786	1	-0.324855	1	-0.370056	1	-0.171521	-0.273409	5.16271e-26	0.997989	FALSE
Arhgap23	0.00480732	1	-0.0142739	1	-0.0147209	1	-0.00079844	1	0.0281434	1	-0.0201823	1	0.00688987	1	-0.0231524	1	-0.0125747	1	-0.0638149	1	0.000631482	-0.0225669	1	1	FALSE
Arhgap26	0.0181011	1	0.0180669	1	-0.168305	1	0.0360466	1	-0.0729218	1	0.0491562	1	-0.0133225	1	0.0177986	1	0.203932	1	0.0181712	1	-0.0338025	0.0551471	1	1	FALSE
Arhgap27	0.016716	1	0.03828	1	0.0134781	1	-0.013214	1	0.0216157	1	-0.0444977	1	-0.0227737	1	-0.00540821	1	-0.00217057	1	0.057392	1	0.0153752	-0.00349164	1	1	FALSE
Arhgap27os1	0.00533971	1	-0.00024675	1	0.035034	1	-0.000648429	1	-0.0116688	1	0.0195299	1	0.00697079	1	0.0514664	1	-0.0118033	1	-0.0296797	1	0.00556195	0.00729682	1	1	FALSE
Arhgap28	0.00826988	1	-0.0343187	1	-0.040582	1	0.016863	1	-0.0470215	0.0292554	-0.0193462	1	0.00203952	1	0.0225475	1	-0.0165254	1	0.022784	1	-0.0193579	0.00229991	0.719448	1	FALSE
Arhgap29	0.101478	1	0.051228	1	-0.106505	1	-0.0808312	1	0.209607	3.64407e-07	0.03047	1	0.155273	1	0.00271719	1	0.176626	1	-0.0268995	1	0.0349952	0.0676373	0.000977121	1	FALSE
Arhgap31	-0.0784566	3.73011e-06	-0.0247144	1	-0.0966271	1	-0.0431784	1	-0.0670528	8.84975e-15	-0.0119376	1	0.0176649	1	-0.0456515	1	-0.0109365	1	-0.0180671	1	-0.0620059	-0.0137856	6.10036e-15	1	FALSE
Arhgap32	0.0176186	1	-0.0204853	1	-0.0342809	1	-0.0435776	1	-0.0122363	1	-0.106537	1	0.029724	1	0.0182295	1	0.058492	1	-0.00124148	1	-0.0185923	-0.000266542	1	1	FALSE
Arhgap35	0.00553468	1	-0.0683556	1	-0.049731	1	0.0685205	1	-0.0410964	1	-0.05254	1	0.0334983	1	-0.0554918	1	-0.0347726	1	-0.0713564	1	-0.0170256	-0.0361325	1	1	FALSE
Arhgap39	0.00896996	1	0.0123746	1	-0.0208645	1	0.105857	1	-0.0269319	0.202885	0.0220354	1	-0.0319126	1	-0.0261342	1	0.0393076	1	0.0400919	1	0.0158811	0.0086776	0.976586	1	FALSE
Arhgap42	-0.0550877	1	0.113466	1	0.0273269	1	0.304011	1	-0.0999398	0.0062875	0.0505589	1	0.0605315	1	-0.209924	1	-0.101449	1	0.112511	1	0.0579553	-0.0175543	0.428438	1	FALSE
Arhgap5	0.0232726	1	-0.117232	1	-0.23294	1	-0.198199	1	0.0155799	1	-0.0847425	1	-0.0292801	1	-0.0588634	1	0.0109465	1	-0.0564541	1	-0.101904	-0.0436787	1	1	FALSE
Arhgap6	-0.0745676	1	0.0471432	1	-0.118282	1	0.0495257	1	-0.083846	0.000107629	-0.110907	1	-0.029969	1	-0.0885263	1	0.0946864	1	-0.162884	1	-0.0360054	-0.05952	0.0505194	1	FALSE
Arhgap8	-0.0788403	0.00139159	-0.00965629	1	-0.0470305	1	-0.115115	1	-0.0555267	0.0155043	-0.113585	1	-0.111264	1	0.0650148	1	-0.0513174	1	-0.0429	1	-0.0612338	-0.0508104	0.017937	1	FALSE
Arhgdia	-0.00172765	1	0.018469	1	0.0118789	1	0.209895	1	0.0434752	1	-0.0592759	1	-0.00896178	1	-0.000265632	1	-0.277533	1	0.0075363	1	0.0563982	-0.0676999	1	1	FALSE
Arhgdib	-0.032693	1	0.031877	1	-0.00939688	1	-0.0241718	1	-0.0474193	0.13215	0.069111	1	-0.0289881	1	0.0473563	1	0.0229678	1	0.113806	1	-0.0163608	0.0448507	0.945173	1	FALSE
Arhgdig	-0.172348	1.18875e-06	-0.0923798	0.0950421	-0.232782	1	-0.154056	1	-0.135264	8.77445e-12	-0.255495	1	-0.0977476	1	0.0332414	1	-0.0313847	1	-0.122566	1	-0.157366	-0.0947903	1.34657e-13	1	FALSE
Arhgef1	0.0780651	1	-0.0539184	1	0.0631413	1	-0.0350443	1	0.106537	1	-0.146725	1	-0.097736	1	0.0404916	1	-0.128531	1	0.0659865	1	0.0317561	-0.0533029	1	1	FALSE
Arhgef10l	0.0105425	1	0.0306543	1	-0.123066	1	-0.0406634	1	-0.0241731	1	0.0080752	1	0.0105833	1	-0.139097	1	0.0010993	1	-0.0479597	1	-0.0293412	-0.0334598	1	1	FALSE
Arhgef11	-0.010894	1	-0.018798	1	0.0215674	1	-0.0492751	1	-0.0346027	0.357684	0.0216548	1	-0.149835	1	0.0295461	1	-0.0897758	1	-0.132157	1	-0.0184005	-0.0641134	0.995891	1	FALSE
Arhgef12	-0.00303062	1	0.0969166	1	-0.188408	1	-0.0933208	1	-0.0515398	1	0.0764498	1	-0.115742	1	-0.0920502	1	0.0930101	1	-0.0259609	1	-0.0478764	-0.0128587	1	1	FALSE
Arhgef15	-0.00483066	1	-0.0175311	1	0.0224626	1	0.0826316	1	-0.008722	1	-0.00743267	1	-0.0212656	1	0.0480952	1	-0.0545403	1	-0.00913063	1	0.0148021	-0.00885482	1	1	FALSE
Arhgef16	-0.0619067	0.00393284	-0.0424094	1	-0.0085291	1	0.0847857	1	-0.0404273	6.81621e-05	-0.0309494	0.332203	-0.0265703	1	-0.0946332	1	0.0575974	1	-0.0229952	1	-0.0136973	-0.0235101	0.000775454	0.994524	FALSE
Arhgef17	0.0756293	1	0.0298511	1	0.0894988	1	0.0557101	1	0.131863	3.01694e-08	0.0678097	1	0.0239998	1	-0.061295	1	0.10085	1	-0.0695626	1	0.0765104	0.0123604	0.000144214	1	FALSE
Arhgef18	-0.00221265	1	0.00284589	1	-0.023068	1	-0.00978406	1	-0.0315203	1	0.000285561	1	-0.0417927	1	-0.0476409	1	-0.120102	1	0.0350706	1	-0.0127478	-0.0348359	1	1	FALSE
Arhgef19	-0.048748	3.487e-05	-0.0123933	1	-0.0999403	1	-0.0787359	1	-0.0921402	1.32008e-15	-0.0144912	1	0.0136399	1	-0.0192449	1	-0.02965	1	0.0717392	1	-0.0663915	0.0043986	8.26288e-15	1	FALSE
Arhgef2	-0.0719087	1	-0.0913416	1	-0.130977	1	0.161469	1	-0.149215	1.59508e-05	-0.00572921	1	-0.0534982	1	-0.00626631	1	-0.14458	1	-0.0764361	1	-0.0563947	-0.0573019	0.0146427	1	FALSE
Arhgef25	-0.0723665	1	-0.0989872	1	-0.184263	1	0.0366936	1	-0.0831445	0.446222	-0.0813231	1	-0.0655619	1	-0.224367	1	-0.119198	1	-0.0488989	1	-0.0804135	-0.10787	0.998535	1	FALSE
Arhgef28	-0.0215013	1	-0.0861992	1	-0.035839	1	-0.0844266	1	-0.0363208	1	-0.0763467	1	0.00827511	1	-0.00992348	1	-0.0286169	1	0.00675068	1	-0.0528574	-0.0199723	1	1	FALSE
Arhgef3	-0.0735333	0.000540741	-0.0373887	1	-0.00119828	1	-0.0852856	1	-0.0664875	2.42293e-06	-0.0543023	1	-0.0266955	1	-0.0863617	1	0.00701189	1	-0.125617	1	-0.0527787	-0.057193	1.17238e-05	1	FALSE
Arhgef40	-0.0305409	1	-0.017521	1	-0.224484	1	-0.238765	1	-0.0942696	0.0370312	-0.070776	1	-0.173885	1	-0.19495	1	0.143006	1	0.0153045	1	-0.121116	-0.0562601	0.76332	1	FALSE
Arhgef5	-0.0761129	1	-0.0572339	1	-0.275989	1	-0.165488	1	-0.063665	1	0.0126332	1	-0.0195308	1	-0.105017	1	0.246286	1	-0.0485622	1	-0.127698	0.0171618	1	1	FALSE
Arhgef7	-0.0476824	1	-0.0558837	1	-0.0903244	1	0.00735943	1	-0.0521998	1	-0.064029	1	-0.0119197	1	-0.0705339	1	-0.0591996	1	-0.0954921	1	-0.0477462	-0.0602349	1	1	FALSE
Arid1a	-0.118483	1	-0.0516496	1	-0.000673503	1	-0.178147	1	-0.0643467	1	-0.111821	1	0.0426354	1	-0.169644	1	0.0426591	1	-0.0133007	1	-0.08266	-0.0418942	1	1	FALSE
Arid1b	0.00590323	1	0.0126775	1	-0.132107	1	-0.0071711	1	-0.0440717	1	-0.0390087	1	-0.107632	1	-0.0808115	1	-0.0220637	1	-0.0216752	1	-0.0329537	-0.0542381	1	1	FALSE
Arid2	-0.0051175	1	-0.00206114	1	-0.190634	1	0.0359336	1	-0.078871	0.212318	-0.0921801	1	-0.0710464	1	-0.0791307	1	-0.117572	1	-0.0900324	1	-0.0481499	-0.0899922	0.978989	1	FALSE
Arid4a	-0.00800286	1	0.143518	1	-0.20372	1	0.0485542	1	0.0143099	1	0.0137091	1	0.0314854	1	-0.0839324	1	0.0130605	1	0.0693234	1	-0.00106823	0.00872918	1	1	FALSE
Arid4b	-0.103837	1	0.0296838	1	-0.176903	1	0.029695	1	-0.163324	0.0330295	0.0167109	1	0.104193	1	-0.150535	1	0.103904	1	-0.155753	1	-0.076937	-0.0162962	0.742256	1	FALSE
Arid5a	-0.126255	0.190249	0.0729471	1	0.0850296	1	-0.149917	1	-0.171281	2.49082e-07	0.0179765	1	-0.049256	1	0.159816	1	0.0142221	1	-0.152101	1	-0.0578953	-0.00186846	0.000205202	1	FALSE
Arid5b	0.0544056	1	-0.0884134	1	-0.376653	1	-0.0294033	1	0.078412	1	-0.0251113	1	-0.00851285	1	-0.0703267	1	0.188621	1	-0.0105871	1	-0.0723304	0.0148166	1	1	FALSE
Arih1	-0.0595185	1	-0.0862642	1	-0.114852	1	-0.203149	1	-0.0709113	1	-0.209747	1	-0.104799	1	-0.266974	1	0.0901845	1	-0.123554	1	-0.106939	-0.122978	1	1	FALSE
Arih2	0.018229	1	-0.0461098	1	-0.137839	1	-0.0376933	1	-0.0259029	1	-0.10976	1	-0.0303092	1	-0.0280397	1	-0.241779	1	0.022705	1	-0.0458633	-0.0774366	1	1	FALSE
Arl1	-0.120219	0.0182512	-0.231566	0.35807	-0.0832035	1	-0.11159	1	-0.245027	1.12051e-12	-0.251676	1	-0.206217	1	-0.0392748	1	-0.35693	1	-0.173731	1	-0.158321	-0.205566	3.8862e-10	1	FALSE
Arl10	0.00508515	1	0.00449421	1	0.0083141	1	0.0145269	1	-0.0129462	1	0.00502753	1	0.00894616	1	0.00784142	1	0.0402824	1	-0.0108152	1	0.00389484	0.0102565	1	1	FALSE
Arl13b	-0.0521004	1	-0.0125135	1	-0.0493502	1	-0.0443081	1	-0.0975011	0.000918427	0.0324861	1	-0.0325132	1	-0.00142996	1	-0.0435276	1	-0.27401	1	-0.0511547	-0.0637988	0.173645	1	FALSE
Arl14ep	0.0867524	1	-0.0958105	1	-0.0119317	1	-0.100825	1	-0.0130595	1	-0.0710298	1	-0.136959	1	0.00572837	1	-0.044673	1	0.0264901	1	-0.0269749	-0.0440887	1	1	FALSE
Arl15	-0.00862816	1	-0.00782905	1	-0.0221482	1	-0.0387581	1	0.0170258	1	0.0113311	1	0.022672	1	0.0242833	1	0.045784	1	-0.0124444	1	-0.0120675	0.0183252	1	1	FALSE
Arl16	-0.00852069	1	-0.00411238	1	0.0627359	1	0.0317511	1	0.0575692	1	-0.0419786	1	0.0579114	1	0.0713349	1	0.0251003	1	-0.0124758	1	0.0278846	0.0199784	1	1	FALSE
Arl2	-0.150048	0.138413	0.0392952	1	0.149119	1	-0.143043	1	-0.138279	0.00138934	-0.0793354	1	-0.0206251	1	-0.0154363	1	0.175265	1	0.126554	1	-0.0485912	0.0372845	0.0719033	1	FALSE
Arl2bp	-0.0245722	1	-0.0579767	1	-0.0485137	1	0.00466639	1	-0.0269804	1	-0.0288427	1	-0.131589	1	-0.15672	1	0.164243	1	0.0945771	1	-0.0306753	-0.0116663	1	1	FALSE
Arl3	0.0794528	1	0.185929	1	0.190962	1	0.185732	1	-0.0526955	1	0.215323	0.00551012	0.233577	0.00863223	0.128345	1	0.339615	1	-0.339617	1	0.117876	0.115449	1	0.0301462	FALSE
Arl4a	0.114133	1	0.13472	1	0.0960557	1	0.144011	1	0.0505238	1	0.164607	1	0.167072	1	-0.0382347	1	0.169756	1	0.129959	1	0.107889	0.118632	1	1	FALSE
Arl4c	-0.732932	1.15558e-29	-0.362542	0.0463006	-0.453761	1	-0.26602	1	-0.748054	9.58324e-50	-0.73493	8.57953e-14	-0.467044	1	-0.580355	1	-0.86271	1	-0.885295	0.00355462	-0.512662	-0.706067	2.42658e-72	2.32249e-11	TRUE
Arl5a	0.0243635	1	-0.00375129	1	-0.00855396	1	-0.0985586	1	-0.0240368	1	0.0468769	1	-0.0591554	1	-0.129056	1	0.234154	1	-0.0548362	1	-0.0221074	0.00759657	1	1	FALSE
Arl5b	-0.191647	0.000670047	-0.153094	0.110467	-0.275351	1	0.0232693	1	-0.168079	3.46515e-11	-0.0862087	1	-0.0134711	1	-0.119814	1	-0.0750834	1	-0.0293775	1	-0.15298	-0.064791	1.53905e-10	1	FALSE
Arl6	-0.0256201	1	-0.0122949	1	0.0319272	1	-0.0617005	1	-0.0474345	0.00147843	0.0204684	1	-0.0580008	1	-0.0525756	1	-0.00565905	1	-0.00953109	1	-0.0230246	-0.0210596	0.221802	1	FALSE
Arl6ip1	-0.187242	1	0.134659	1	0.346593	1	0.209711	1	0.128285	1	0.168752	1	0.00656861	1	0.0914144	1	0.730853	1	0.322797	1	0.126401	0.264077	1	1	FALSE
Arl6ip4	-0.0418236	1	0.0652304	1	-0.116142	1	-0.00533526	1	-0.00220824	1	0.0444746	1	0.0608594	1	0.0536467	1	-0.0204206	1	0.0985238	1	-0.0200558	0.0474168	1	1	FALSE
Arl6ip5	-0.0318363	1	0.276251	1	0.188072	1	0.205606	1	0.07075	1	-0.0467955	1	-0.024129	1	-0.0316399	1	-0.0485763	1	-0.0114072	1	0.141768	-0.0325096	1	1	FALSE
Arl6ip6	-0.0437283	1	-0.0458679	1	-0.00467722	1	-0.0149793	1	-0.0919928	1	-0.0260945	1	-0.0224695	1	-0.101398	1	-0.05988	1	-0.02382	1	-0.0402491	-0.0467325	1	1	FALSE
Arl8a	-0.00837059	1	-0.00261213	1	-0.0424722	1	-0.2415	1	-0.103775	0.0824562	0.0227699	1	-0.00374804	1	-0.00343048	1	0.0234633	1	-0.0898867	1	-0.0797459	-0.0101664	0.89178	1	FALSE
Arl8b	0.0512958	1	0.0460245	1	0.108425	1	-0.0261886	1	0.0398721	1	0.053486	1	-0.0523623	1	-0.15832	1	0.0880818	1	-0.0851134	1	0.0438858	-0.0308455	1	1	FALSE
Armc1	0.0238696	1	0.0529272	1	-0.0938776	1	-0.0203727	1	-0.00638503	1	-0.0824763	1	0.0140675	1	-0.176867	1	0.0869743	1	0.0355926	1	-0.00876773	-0.0245418	1	1	FALSE
Armc10	-0.0880347	1	-0.0865057	1	-0.0350155	1	-0.073671	1	-0.0879456	0.000158289	-0.0365998	1	-0.0483393	1	0.0437961	1	0.00990176	1	-0.0780137	1	-0.0742345	-0.021851	0.0639647	1	FALSE
Armc3	-0.0716986	6.49999e-06	-0.0187232	1	-0.0600255	1	0.0165386	1	-0.0865642	4.10589e-11	0.00353454	1	0.0345624	1	-0.0344339	1	0.222419	1	0.0507894	1	-0.0440946	0.0553743	2.06206e-11	1	FALSE
Armc5	0.0112822	1	-0.017798	1	-0.032937	1	0.000193938	1	-0.0159811	1	-0.0226948	1	0.0105926	1	-0.0378673	1	-0.0324531	1	-0.0111304	1	-0.011048	-0.0187106	1	1	FALSE
Armc6	0.00518403	1	-0.0435607	1	0.0354765	1	-0.0278079	1	-0.0165066	1	0.0317262	1	0.0209472	1	-0.0268408	1	-0.0260061	1	0.027285	1	-0.00944294	0.00542229	1	1	FALSE
Armc8	-0.0235027	1	-0.0397455	1	-0.117423	1	-0.0575829	1	-0.0397943	1	-0.00805835	1	-0.00155275	1	-0.05584	1	0.0402174	1	-0.066442	1	-0.0556098	-0.0183351	1	1	FALSE
Armc9	-0.0105201	1	-0.0034828	1	0.0154632	1	-0.0169146	1	-0.0233074	1	-0.143953	1	0.0205935	1	0.0294511	1	0.0119869	1	-0.0241906	1	-0.00775234	-0.0212224	1	1	FALSE
Armcx5	-0.0018564	1	0.034237	1	-0.0243843	1	-0.034834	1	-0.035825	0.105094	-0.0706177	1	-0.0223095	1	-0.0630319	1	0.0284803	1	0.0423841	1	-0.0125325	-0.0170189	0.921659	1	FALSE
Armt1	-0.0617447	1	-0.0603169	1	0.0189322	1	0.025981	1	0.000163861	1	0.00338443	1	0.0325533	1	0.00786915	1	-0.013163	1	0.00534226	1	-0.0153969	0.00719722	1	1	FALSE
Arnt	0.0237053	1	0.0305766	1	-0.0898662	1	-0.0144557	1	0.0249202	1	0.0326326	1	0.00495009	1	0.0128375	1	0.0069084	1	-0.157482	1	-0.00502398	-0.0200308	1	1	FALSE
Arntl	-0.0186902	1	-0.0526597	0.929155	-0.0534714	1	-0.0572763	1	-0.0401623	6.6843e-12	-0.0369312	3.02786e-05	-0.022988	1	-0.0512526	1	0.0128748	1	-0.049931	1	-0.044452	-0.0296456	1.34765e-07	0.0224571	FALSE
Arntl2	-0.0058714	1	0.0564559	1	-0.0382665	1	-0.0991506	1	0.00903641	1	-0.00395494	1	-0.100902	1	-0.0801505	1	-0.0309956	1	-0.213432	1	-0.0155592	-0.0858871	1	1	FALSE
Arpc1a	-0.191909	0.00011219	0.0020286	1	-0.0613189	1	-0.0399198	1	-0.17194	1.14131e-08	-0.210541	1	-0.190248	1	0.0499543	1	-0.171777	1	-0.103612	1	-0.0926118	-0.125245	3.48989e-08	1	FALSE
Arpc1b	0.0771699	1	0.0983249	1	-0.160702	1	0.233194	1	-0.0270214	1	-0.0242313	1	0.0874228	1	0.0849505	1	-0.2437	1	0.0228526	1	0.0441931	-0.014541	1	1	FALSE
Arpc2	0.00503886	1	0.145629	1	0.156004	1	0.254506	1	0.0018683	1	-0.129496	1	0.127356	1	-0.228877	1	-0.266201	1	0.0161435	1	0.112609	-0.0962148	1	1	FALSE
Arpc3	0.0146482	1	-0.0608985	1	-0.0464898	1	-0.0800605	1	-0.000957446	1	-0.0483504	1	0.1416	1	-0.0033829	1	0.113992	1	0.0409147	1	-0.0347516	0.0489548	1	1	FALSE
Arpc4	-0.117951	1	-0.170925	1	-0.0379502	1	0.0597755	1	-0.0953589	0.0348497	-0.167008	1	-0.451879	0.135018	-0.295078	1	-0.0360468	1	-0.204557	1	-0.072482	-0.230914	0.752194	0.947135	FALSE
Arpc5	-0.0615339	1	-0.0509564	1	-0.0281993	1	0.103216	1	-0.106473	0.300004	-0.0749224	1	-0.0399692	1	-0.343704	1	-0.332237	1	0.149957	1	-0.0287893	-0.128175	0.992151	1	FALSE
Arpc5l	0.0690201	1	-0.0602062	1	0.0623284	1	0.0450561	1	0.0476886	1	0.0262539	1	0.0851499	1	-0.0796249	1	-0.108872	1	0.0705179	1	0.0327774	-0.00131511	1	1	FALSE
Arpin	-0.00253775	1	0.0278827	1	0.0386438	1	0.126742	1	0.00899057	1	0.0361908	1	-0.0419664	1	0.0937667	1	0.0403077	1	-0.330956	1	0.0399442	-0.0405315	1	1	FALSE
Arpp19	-0.350266	1.18984e-22	-0.217164	0.594487	-0.208867	1	-0.264564	1	-0.332247	3.27814e-32	-0.322558	0.000103693	-0.589791	8.51324e-08	-0.4665	1	-0.670475	0.102615	-0.336772	1	-0.274622	-0.477219	2.32206e-47	2.59106e-08	TRUE
Arrb2	0.0136709	1	-0.0205577	1	0.000975036	1	0.0285045	1	0.0411293	1	0.00442065	1	0.0135375	1	0.00355585	1	-0.00368521	1	0.00193445	1	0.0127444	0.00395265	1	1	FALSE
Arrdc1	-0.0607115	1	-0.0672769	1	-0.0810598	1	-0.0646983	1	0.0182612	1	-0.103405	1	-0.137365	1	0.108388	1	0.0956123	1	-0.204385	1	-0.0510971	-0.048231	1	1	FALSE
Arrdc2	0.015155	1	-0.0573745	1	0.00210517	1	2.11352e-05	1	-0.0011765	1	-0.0249312	1	0.0159126	1	-0.0141289	1	0.00137319	1	-0.00923188	1	-0.00825393	-0.00620122	1	1	FALSE
Arrdc3	0.024183	1	-0.0694254	1	-0.103479	1	-0.124779	1	-0.0617236	0.00194999	0.0324022	1	-0.048816	1	0.0502637	1	0.0666198	1	-0.015425	1	-0.0670446	0.0170089	0.254224	1	FALSE
Arsa	0.0577841	1	0.0490698	1	0.102649	1	-0.0120955	1	0.0994388	1	0.0806621	1	-0.0420067	1	-0.0348237	1	-0.079179	1	-0.00927897	1	0.0593693	-0.0169253	1	1	FALSE
Arsb	0.00339557	1	-0.0215655	1	0.0323425	1	-0.0197231	1	-0.0346961	1	0.017702	1	0.0454074	1	-0.0253969	1	-0.0403719	1	-0.001948	1	-0.00804934	-0.000921448	1	1	FALSE
Arsk	0.00138305	1	0.00250808	1	0.0133255	1	-0.014077	1	-0.0192744	1	-0.00246152	1	0.0265353	1	0.0278476	1	-0.00224548	1	0.0231776	1	-0.00322696	0.0145707	1	1	FALSE
Arv1	-0.0044551	1	-0.0570671	1	0.00398642	1	0.138414	1	-0.0146823	1	-0.0125134	1	-0.0549102	1	-0.0655004	1	-0.0642484	1	-0.0525943	1	0.0132391	-0.0499534	1	1	FALSE
Arvcf	-0.00124889	1	-0.0229955	1	0.0659228	1	-0.00826921	1	-0.0299844	0.31245	0.0237542	1	-0.0308522	1	-0.00391624	1	0.0300566	1	-0.0509344	1	0.000684951	-0.00637842	0.993169	1	FALSE
Asah1	0.142899	1	-0.0736843	1	0.105851	1	0.116304	1	0.0214339	1	0.0143525	1	-0.281979	1	-0.547115	1	-0.218229	1	0.00348174	1	0.0625609	-0.205898	1	1	FALSE
Asap1	-0.0755923	1	0.0786057	1	-0.147326	1	0.0461559	1	0.150108	1	-0.284206	1	-0.129113	1	0.0361704	1	0.0891059	1	-0.147969	1	0.0103903	-0.0872022	1	1	FALSE
Asap2	-0.0204046	1	-0.0677898	1	-0.152461	1	0.280229	1	-0.00357833	1	0.0487602	1	0.137765	1	0.21648	1	0.263341	1	-0.0846789	1	0.00719903	0.116333	1	1	FALSE
Asap3	-0.0215546	0.0433283	-0.0205061	1	-0.0502689	1	-0.0746401	1	-0.0274376	0.00266565	-0.00379679	1	-0.00334537	1	0.0164015	1	-0.0199339	1	0.00280985	1	-0.0388815	-0.00157294	0.0527691	1	FALSE
Asb13	-0.0183363	1	-0.0278219	1	-0.0282332	1	-0.016292	1	-0.0242076	1	-0.0977249	1	-0.0645904	1	-0.043953	1	0.0808934	1	0.00853581	1	-0.0229782	-0.0233678	1	1	FALSE
Asb3	0.0266627	1	0.00770693	1	0.0549732	1	-0.00441158	1	-0.0459062	0.0397805	-0.0731034	1	-0.00218981	1	-0.00636177	1	0.0180465	1	-0.0380037	1	0.007805	-0.0203224	0.776258	1	FALSE
Asb6	-0.00709315	1	-0.111359	0.0538832	-0.0189289	1	-0.0282443	1	-0.00643129	1	0.000459774	1	-0.0171795	1	-0.031217	1	-0.0946487	1	0.0251407	1	-0.0344113	-0.023489	0.828369	1	FALSE
Asb7	-0.0103703	1	-0.0193758	1	0.0599733	1	0.0319699	1	-0.0219191	1	-0.00967758	1	-0.0454507	1	-0.0697768	1	-0.0346094	1	0.00565292	1	0.0080556	-0.0307723	1	1	FALSE
Asb8	-0.00795551	1	-0.0273564	1	-0.0142974	1	-0.0236586	1	0.0187985	1	0.0328571	1	-0.0095369	1	0.0299508	1	-0.0977557	1	-0.00998346	1	-0.0108939	-0.0108936	1	1	FALSE
Ascc1	0.0352899	1	0.0474268	1	0.0635497	1	0.0494917	1	0.0363243	1	-0.0577849	1	0.0463729	1	0.0758275	1	0.0832927	1	0.157919	1	0.0464165	0.0611255	1	1	FALSE
Ascc2	-0.00870702	1	0.0121908	1	0.0519998	1	-0.0198591	1	-0.020863	1	0.0192081	1	-0.0871567	1	0.0587304	1	0.0047057	1	0.0965254	1	0.00295232	0.0184026	1	1	FALSE
Ascc3	-0.0897517	1	-0.223206	0.983829	-0.378648	0.389132	-0.306721	1	-0.181508	1.0759e-09	0.0418486	1	-0.159772	1	-0.00309374	1	0.223615	1	-0.0358026	1	-0.235967	0.0133591	4.54128e-06	1	FALSE
Asf1a	-0.208266	2.73525e-10	-0.219616	0.0641997	-0.158805	1	-0.0789873	1	-0.191966	2.30568e-11	-0.0892002	1	-0.117826	1	-0.137608	1	-0.0601269	1	-0.109428	1	-0.171528	-0.102838	1.07898e-16	1	FALSE
Asf1b	0.140387	1	-0.0450567	1	-0.0284473	1	0.134412	1	0.0233584	1	-0.0194718	1	-0.0184358	1	-0.203169	1	0.0540616	1	-0.0400696	1	0.0449306	-0.0454169	1	1	FALSE
Ash1l	0.166636	1	0.0270142	1	-0.177815	1	-0.0469982	1	0.0152135	1	-0.0287501	1	-0.0347495	1	-0.220543	1	0.302391	1	-0.108661	1	-0.00318985	-0.0180626	1	1	FALSE
Ash2l	-0.185233	1.85001e-05	-0.078497	1	-0.116716	1	0.0625251	1	-0.158563	9.01212e-09	-0.0412009	1	-0.287653	1	-0.0439157	1	-0.105883	1	-0.162612	1	-0.0952968	-0.128253	5.991e-09	1	FALSE
Asl	-0.0673149	1	-0.0703339	1	0.00859081	1	0.07995	1	-0.055876	1	0.0243867	1	0.0601629	1	-0.143342	1	-0.0402802	1	0.109454	1	-0.0209968	0.00207621	1	1	FALSE
Asna1	-0.0536674	1	-0.162205	0.256224	-0.0341822	1	-0.0436536	1	-0.0568346	1	0.00313443	1	-0.0338724	1	-0.0896784	1	-0.102162	1	0.037445	1	-0.0701085	-0.0370267	0.987205	1	FALSE
Asns	-0.0220266	1	-0.161828	0.388948	-0.0169273	1	-0.114501	1	0.0621554	1	-0.232635	1	-0.0801481	1	0.0145733	1	-0.058478	1	0.0936212	1	-0.0506255	-0.0526133	0.997125	1	FALSE
Asnsd1	0.0356006	1	0.00993211	1	-0.0242854	1	-0.0054192	1	0.000727113	1	0.0136525	1	0.026406	1	0.133023	1	-0.0561858	1	-0.0564828	1	0.00331105	0.0120826	1	1	FALSE
Asph	0.047802	1	-0.142145	1	-0.148823	1	0.136	1	-0.0580083	0.0884206	0.117103	1	0.0916276	1	0.0385916	1	0.188103	1	0.0829963	1	-0.0330347	0.103684	0.900887	1	FALSE
Aspm	0.0395913	1	-0.0900379	1	-0.0595603	1	-0.144811	1	0.033606	1	0.0441563	1	-0.0756014	1	-0.0873149	1	0.116397	1	0.0882541	1	-0.0442423	0.0171783	1	1	FALSE
Aspscr1	0.0533731	1	0.149058	1	0.114256	1	-0.0506942	1	0.171829	1	-0.0363183	1	-0.103527	1	0.146958	1	-0.0729882	1	0.0183029	1	0.0875644	-0.00951446	1	1	FALSE
Asrgl1	-0.0114479	1	0.0366306	1	-0.0247541	1	-0.0778477	1	0.00245478	1	0.00246844	1	-0.0760841	1	0.0842945	1	-0.0546327	1	-0.0174068	1	-0.0149929	-0.0122721	1	1	FALSE
Ass1	-0.378096	1.92421e-34	-0.356095	2.26069e-09	-0.351347	1	-0.55076	1	-0.459607	1.98694e-75	-0.500462	6.54554e-24	-0.461664	0.00131801	-0.246699	1	-0.78629	0.166583	-0.500403	0.0102537	-0.419181	-0.499104	1.92966e-109	1.26783e-23	TRUE
Asxl1	0.019486	1	-0.0284666	1	-0.0924867	1	-0.0476645	1	-0.0390655	1	0.00217304	1	0.024545	1	0.0475114	1	0.0699263	1	-0.00876714	1	-0.0376395	0.0270777	1	1	FALSE
Asxl2	0.0098471	1	-0.112944	1	-0.214604	1	-0.00648065	1	-0.0247419	1	0.0101091	1	-0.0331126	1	-0.0585855	1	-0.0708719	1	0.0596717	1	-0.0697846	-0.0185578	1	1	FALSE
Atad1	-0.0399824	1	-0.0753581	1	-0.121118	1	0.117669	1	-0.0155854	1	-0.00974685	1	0.0296075	1	-0.0820873	1	-0.00770709	1	0.0239872	1	-0.0268749	-0.00918932	1	1	FALSE
Atad2	0.0345163	1	-0.0776393	1	-0.453586	1	0.203125	1	0.080992	1	0.0177472	1	0.0156407	1	0.200497	1	0.157249	1	0.198223	1	-0.0425184	0.117871	1	1	FALSE
Atad2b	-0.0513169	1	-0.0209797	1	-0.172192	1	-0.179129	1	-0.109838	1.07805e-06	0.0344022	1	-0.0816174	1	-0.00561622	1	0.0803242	1	-0.0290249	1	-0.106691	-0.000306414	0.00218486	1	FALSE
Atad3a	0.0260309	1	-0.0755049	1	-0.110091	1	-0.110478	1	0.0503339	1	-0.0392587	1	-0.0414607	1	-0.00706472	1	-0.00596232	1	0.022557	1	-0.0439418	-0.0142379	1	1	FALSE
Atad5	-0.041516	1	-0.0714991	1	-0.0437879	1	0.0442963	1	-0.0101997	1	-0.0623267	1	0.0259795	1	0.0422119	1	-0.00645989	1	-0.0014239	1	-0.0245413	-0.000403816	1	1	FALSE
Atat1	-0.0139988	1	-0.000792447	1	0.00847781	1	-0.0397671	1	-0.0759737	3.96081e-06	-0.00454379	1	0.00708027	1	0.0167608	1	-0.113232	1	-0.0232195	1	-0.0244108	-0.0234309	0.00558136	1	FALSE
Ate1	0.0349899	1	-0.0303812	1	-0.0443072	1	0.0485536	1	-0.0118908	1	0.0493628	1	-0.0767097	1	0.028813	1	0.0762606	1	0.0108693	1	-0.000607131	0.0177192	1	1	FALSE
Atf1	-0.00308873	1	-0.0593803	1	-0.0134391	1	0.0796994	1	-0.0546431	1	0.0400469	1	-0.03573	1	-0.0851892	1	0.0294286	1	-0.0721474	1	-0.0101704	-0.0247182	1	1	FALSE
Atf2	0.0716888	1	0.080305	1	0.0335591	1	0.0156425	1	-0.0276032	1	-0.0437273	1	-0.00304164	1	-0.0803421	1	-0.0154038	1	0.0136055	1	0.0347185	-0.0257819	1	1	FALSE
Atf3	-0.0356385	1	0.129813	1	-0.25133	1	0.189739	1	-0.137054	1	-0.18507	1	-0.160832	1	-0.107051	1	0.341215	1	-0.533861	1	-0.020894	-0.12912	1	1	FALSE
Atf4	-0.021273	1	0.00732187	1	0.264101	1	0.0561881	1	-0.063653	1	-0.0948418	1	-0.0649335	1	0.00284149	1	-0.284334	1	0.0711779	1	0.048537	-0.074018	1	1	FALSE
Atf5	-0.0988846	0.0816689	-0.0909614	1	-0.103152	1	0.123824	1	-0.168417	0.398382	-0.228365	1	-0.22611	1	-0.0673367	1	-0.544422	1	-0.255039	1	-0.0675184	-0.264254	0.739446	1	FALSE
Atf6	0.0183403	1	0.0148472	1	-0.031088	1	-0.0886175	1	0.0303909	1	0.0254508	1	-0.0322668	1	-0.114703	1	0.0129527	1	0.0554009	1	-0.0112254	-0.0106331	1	1	FALSE
Atf6b	0.0145354	1	-0.119691	0.0822802	-0.0513706	1	0.0300341	1	0.0238413	1	-0.0221336	1	-0.0213108	1	-0.0381212	1	-0.0870428	1	0.0319626	1	-0.0205302	-0.0273292	0.891495	1	FALSE
Atf7	0.00764532	1	0.0166869	1	0.0547946	1	-0.0316952	1	-0.0618829	1	-0.000181598	1	0.0203279	1	0.0155533	1	-0.070207	1	-0.0230705	1	-0.00289026	-0.0115156	1	1	FALSE
Atf7ip	-0.0149676	1	-0.0195279	1	0.0447848	1	0.00187009	1	0.00692299	1	-0.0168812	1	-0.0602091	1	-0.0547843	1	0.111157	1	0.0129855	1	0.00381647	-0.00154649	1	1	FALSE
Atg10	0.0228597	1	0.000653522	1	0.0467403	1	-0.028005	1	-0.00839995	1	0.0599428	1	0.0165767	1	0.0498293	1	-0.0300029	1	0.0316788	1	0.00676972	0.0256049	1	1	FALSE
Atg101	7.20577e-05	1	0.016013	1	0.0510558	1	0.0410447	1	-0.0337903	1	0.173314	0.46011	0.0544385	1	0.0153553	1	0.0964126	1	0.131127	1	0.014879	0.0941294	1	0.998762	FALSE
Atg12	0.0517796	1	0.0311731	1	0.145214	1	-0.103761	1	0.00305762	1	0.0660539	1	-0.10764	1	-0.0427191	1	0.0285358	1	-0.142009	1	0.0254928	-0.0395558	1	1	FALSE
Atg13	0.00505668	1	-0.0108536	1	0.0189666	1	0.0517104	1	0.00844447	1	0.0355113	1	-0.0449072	1	0.0310802	1	-0.00908026	1	0.015421	1	0.0146649	0.00560499	1	1	FALSE
Atg14	0.022398	1	-0.00900853	1	0.0166757	1	-0.0626209	1	-0.0209118	1	0.0232697	1	0.0173443	1	0.00522969	1	0.0314866	1	0.0284984	1	-0.0106935	0.0211658	1	1	FALSE
Atg16l1	-0.0113143	1	-0.0908453	1	-0.0777148	1	-0.126283	1	-0.0488248	1	-0.022186	1	0.00105518	1	-0.124673	1	-0.138072	1	-0.0185096	1	-0.0709964	-0.060477	1	1	FALSE
Atg16l2	-0.00894536	1	-0.0871506	1	-0.0202383	1	-0.0685345	1	0.00582545	1	-0.0399092	1	-0.0962997	1	-0.247743	1	0.0154463	1	0.0212865	1	-0.0358086	-0.0694438	1	1	FALSE
Atg2a	-0.0409264	0.875955	-0.0548814	1	0.0174396	1	-0.0844668	1	-0.0274801	1	-0.169595	1	-0.166683	1	-0.0157095	1	0.024219	1	0.0666678	1	-0.038063	-0.0522202	1	1	FALSE
Atg2b	0.00619883	1	-0.0736891	0.0866533	-0.00106998	1	0.0199672	1	0.0278394	1	-0.049517	1	-0.0353887	1	-0.0603344	1	0.070889	1	0.030533	1	-0.00415073	-0.00876364	0.898295	1	FALSE
Atg3	0.0173818	1	-0.034889	1	-0.0399202	1	-0.012547	1	0.00267505	1	0.0989332	1	0.0209786	1	0.0233943	1	0.0690315	1	0.101478	1	-0.0134599	0.0627632	1	1	FALSE
Atg4a	0.00120817	1	0.0350799	1	-0.0139734	1	0.0122126	1	-0.000216054	1	-0.00574316	1	-0.0184113	1	-0.0463784	1	-0.00736693	1	-0.0092849	1	0.00686225	-0.017437	1	1	FALSE
Atg4b	-0.0104821	1	0.0699223	1	-0.100349	1	-0.0232975	1	-0.0237694	1	-0.0981463	1	-0.0264251	1	-0.141415	1	-0.0253885	1	-0.0282284	1	-0.0175951	-0.0639207	1	1	FALSE
Atg4d	0.037452	1	-0.0279013	1	-0.085434	1	0.0718692	1	0.0288833	1	0.0198536	1	-0.0107237	1	0.0221338	1	-0.0402574	1	0.0145143	1	0.00497385	0.00110411	1	1	FALSE
Atg5	-0.00355411	1	-0.0238096	1	-0.0658255	1	0.0160469	1	0.001765	1	0.00556749	1	-0.128199	1	-0.0601441	1	-0.268405	1	0.0819536	1	-0.0150755	-0.0738453	1	1	FALSE
Atg7	-0.00853228	1	0.00107794	1	0.0745469	1	-0.012244	1	0.00149119	1	-0.11037	1	-0.0230733	1	0.0152855	1	-0.0464392	1	-0.100536	1	0.011268	-0.0530266	1	1	FALSE
Atg9a	0.0365228	1	0.0186044	1	-0.0287362	1	0.0213032	1	0.0274819	1	0.0180706	1	0.047493	1	-0.0706498	1	0.0465985	1	0.0045518	1	0.0150352	0.00921283	1	1	FALSE
Atic	-0.0439677	1	-0.129782	1	-0.154309	1	-0.131413	1	-0.0595628	1	-0.195926	1	-0.138161	1	-0.245092	1	0.133277	1	0.0765129	1	-0.103807	-0.0738777	1	1	FALSE
Atl2	0.0291524	1	-0.0153133	1	-0.11839	1	-0.0378358	1	0.00903617	1	-0.0277231	1	-0.0110758	1	-0.0370811	1	0.00192915	1	-0.0330619	1	-0.0266702	-0.0214025	1	1	FALSE
Atl3	-0.052136	1	-0.0826246	1	-0.0827964	1	0.0897477	1	-0.030505	1	-0.142826	1	0.0146047	1	0.00710825	1	0.0957408	1	-0.0613933	1	-0.0316629	-0.0173531	1	1	FALSE
Atm	0.0152378	1	-0.0443526	1	-0.108475	1	-0.00325603	1	-0.0168644	1	0.0102513	1	-0.0203796	1	-0.0678549	1	0.0626148	1	0.0602683	1	-0.031542	0.00897998	1	1	FALSE
Atmin	0.0241171	1	0.0276593	1	-0.031678	1	0.0370859	1	0.0350464	1	0.021198	1	0.00288971	1	-0.0122104	1	0.0322635	1	0.00745043	1	0.0184461	0.0103182	1	1	FALSE
Atn1	-0.00305278	1	0.0222588	1	0.0500397	1	0.201811	1	-0.00034165	1	-0.332324	1	-0.13428	1	-0.173234	1	-0.0858823	1	-0.0182035	1	0.0541431	-0.148785	1	1	FALSE
Atox1	0.260637	0.0360572	0.166166	1	0.169694	1	0.356666	1	0.32379	2.73579e-14	0.194719	1	0.0259006	1	0.368559	1	0.150211	1	-0.00674267	1	0.255391	0.146529	6.59898e-11	1	FALSE
Atp10a	-0.0158453	1	-0.0118267	1	-0.0374643	1	0.0519568	1	-0.00541697	1	-0.00561211	1	-0.0144066	1	-0.0605722	1	0.0265657	1	-0.00992577	1	-0.0037193	-0.0127902	1	1	FALSE
Atp11a	-0.0319338	1	-0.124796	1	-0.170354	1	-0.0295995	1	-0.122729	0.00199936	-0.000174751	1	-0.113145	1	-0.234399	1	-0.0458854	1	0.0212303	1	-0.0958824	-0.0744748	0.257317	1	FALSE
Atp11b	0.110934	1	0.05705	1	0.0726162	1	0.00570897	1	0.0127538	1	0.153876	1	0.0646435	1	-0.0864804	1	0.243165	1	0.119771	1	0.0518125	0.0989948	1	1	FALSE
Atp11c	-0.0194631	1	-0.07066	1	-0.0886783	1	0.0141979	1	-0.0698539	0.000483231	0.0132452	1	-0.00227732	1	0.0193878	1	0.0551174	1	-0.0217341	1	-0.0468915	0.0127478	0.122523	1	FALSE
Atp13a1	0.0220004	1	-0.0635646	1	-0.101128	1	-0.0207049	1	0.000345875	1	-0.0273682	1	-0.0213769	1	-0.0825129	1	0.03461	1	-0.0425535	1	-0.0326103	-0.0278403	1	1	FALSE
Atp13a2	-0.0119536	1	-0.0287317	1	-0.0204523	1	-0.0448137	1	0.00573808	1	0.0248118	1	0.0207646	1	-0.0283761	1	0.0139251	1	-0.00776865	1	-0.0200426	0.00467136	1	1	FALSE
Atp13a3	-0.0684281	1	-0.253148	0.0210387	-0.00200868	1	-0.343633	1	-0.112607	0.00136996	0.0755848	1	-0.235032	1	-0.291899	1	0.151395	1	-0.0486448	1	-0.155965	-0.0697192	0.021739	1	FALSE
Atp1a1	-0.120851	1	0.171378	1	-0.267013	1	-0.0879661	1	-0.341564	0.0151341	-0.262465	1	-0.274444	1	-0.288379	1	-0.327742	1	-0.470011	1	-0.129203	-0.324608	0.591615	1	FALSE
Atp1b3	0.0442229	1	0.0388806	1	-0.096764	1	0.110583	1	0.108351	1	0.0370096	1	0.00480723	1	-0.0669005	1	-0.152685	1	0.116519	1	0.0410547	-0.0122498	1	1	FALSE
Atp23	-0.0268812	1	-0.0130317	1	0.0555244	1	-0.0350192	1	-0.00798871	1	0.0221228	1	-0.0636833	1	-0.0293097	1	-0.107732	1	0.0414904	1	-0.0054793	-0.0274224	1	1	FALSE
Atp2a2	0.058947	1	-0.0721352	1	-0.218993	1	0.00132359	1	0.109201	1	-0.0137813	1	-0.0941749	1	-0.430906	1	0.0619758	1	-0.18145	1	-0.0243314	-0.131667	1	1	FALSE
Atp2b1	0.271972	0.00069066	0.460542	0.000336816	-0.01316	1	0.167069	1	0.387799	4.07307e-19	0.068564	1	0.297845	1	-0.140031	1	-0.0114672	1	0.299327	1	0.254844	0.102848	4.66964e-20	1	FALSE
Atp2c1	-0.0598367	1	-0.0245747	1	-0.039505	1	-0.0336991	1	-0.0620164	0.017772	0.0257333	1	-0.0263597	1	-0.134797	1	0.00679278	1	-0.0623676	1	-0.0439264	-0.0381997	0.62295	1	FALSE
Atp2c2	-0.0176007	1	-0.00633413	1	-0.0782671	1	0.00406662	1	-0.0275499	1	0.0151265	1	-0.0362887	1	-0.0198467	1	0.024432	1	-0.0738926	1	-0.0251371	-0.0180939	1	1	FALSE
Atp5a1	-0.139774	1	-0.0279382	1	-0.214502	1	-0.0772229	1	-0.0211176	1	0.0572368	1	-0.2161	1	0.29709	1	-0.341572	1	0.0849812	1	-0.0961108	-0.0236727	1	1	FALSE
Atp5b	-0.117546	1	-0.155568	1	0.0238618	1	-0.0867423	1	0.0620151	1	-0.0845431	1	-0.247953	1	-0.040657	1	-0.285049	1	0.0348751	1	-0.0547958	-0.124665	1	1	FALSE
Atp5c1	-0.1341	0.408202	0.108045	1	0.118077	1	0.112146	1	0.0195367	1	0.154483	0.00584944	0.194897	1	0.212313	1	0.121803	1	0.196391	1	0.044741	0.175977	0.9977	0.416041	FALSE
Atp5d	-0.105807	1	0.0544454	1	3.69227e-05	1	0.262205	1	-0.00589384	1	0.100273	1	0.0579016	1	0.297209	1	0.0873144	1	0.260208	1	0.0409972	0.160581	1	1	FALSE
Atp5e	0.0730026	1	-0.0977033	1	-0.076431	1	-0.16016	1	0.0642273	1	-0.00928586	1	-0.0717385	1	-0.128285	1	-0.19091	1	0.0314444	1	-0.0394128	-0.073755	1	1	FALSE
Atp5f1	-0.0386036	1	0.086671	1	0.159917	1	0.145462	1	0.0224171	1	-0.0389681	1	0.128532	1	0.109738	1	-0.0432547	1	0.152219	1	0.0751726	0.0616532	1	1	FALSE
Atp5g1	-0.128741	1	-0.209766	1	0.0909591	1	0.0239492	1	-0.0271968	1	0.034995	1	-0.0178797	1	0.178071	1	0.00616404	1	-0.059032	1	-0.0501591	0.0284636	1	1	FALSE
Atp5g2	-0.186061	5.77849e-07	0.278661	1	-0.00783408	1	0.154181	1	-0.0124775	1	0.241949	0.0161401	0.182712	1	0.506092	0.997753	0.327369	1	0.310139	1	0.0452937	0.313652	0.00137885	0.603711	FALSE
Atp5g3	0.081711	1	-0.0946766	1	-0.105624	1	0.0318697	1	-0.0282059	1	0.0971242	1	-0.166678	1	-0.214501	1	-0.0932505	1	-0.180688	1	-0.0229852	-0.111599	1	1	FALSE
Atp5h	0.03131	1	0.00132168	1	0.103585	1	0.211786	1	0.124524	1	0.294068	6.9393e-05	0.0868341	1	0.155102	1	0.347748	1	0.283275	1	0.0945054	0.233405	1	0.0383807	FALSE
Atp5j	-0.0445856	1	3.1158e-05	1	0.0433942	1	0.21686	1	-0.111517	0.0978354	-0.0160227	1	-0.145127	1	-0.108798	1	-0.0413194	1	-0.099702	1	0.0208367	-0.0821938	0.913363	1	FALSE
Atp5j2	-0.106081	1	0.00939804	1	0.0148754	1	0.249312	1	-0.162376	0.00200828	-0.0882491	1	-0.00302136	1	0.0738009	1	0.00824371	1	-0.100862	1	0.00102547	-0.0220177	0.257871	1	FALSE
Atp5k	0.0579155	1	-0.245858	1	0.135202	1	0.0307887	1	-0.162581	0.00133928	-0.1055	1	-0.352798	1	-0.22734	1	-0.418196	1	-0.229872	1	-0.0369066	-0.266741	0.211028	1	FALSE
Atp5l	0.0436976	1	0.13706	1	0.227885	1	0.120932	1	-0.00214405	1	0.0451586	1	-0.0231072	1	0.00240891	1	-0.164662	1	0.192864	1	0.105486	0.0105326	1	1	FALSE
Atp5o.1	-0.123336	1	-0.0282195	1	-0.12929	1	0.034019	1	-0.14736	0.000873717	0.00255395	1	0.0438794	1	-0.189744	1	0.146381	1	0.045931	1	-0.0788372	0.0098004	0.169127	1	FALSE
Atp5s	0.0152658	1	0.042287	1	0.0451381	1	0.0299315	1	0.00625692	1	-0.000909998	1	-0.0355812	1	0.0309016	1	0.027342	1	-0.00596469	1	0.0277759	0.00315754	1	1	FALSE
Atp6ap1	0.00258361	1	0.0441107	1	0.133027	1	-0.0676259	1	0.0509533	1	0.131398	1	-0.031104	1	0.116197	1	-0.147795	1	0.0212926	1	0.0326098	0.0179977	1	1	FALSE
Atp6ap2	0.0776345	1	0.0224503	1	0.0460731	1	-0.106196	1	0.0811144	1	0.0472726	1	-0.0464539	1	-0.13696	1	-0.232347	1	0.00584603	1	0.0242153	-0.0725285	1	1	FALSE
Atp6v0a1	0.033389	1	0.0144457	1	-0.134111	1	-0.0206551	1	-0.0214553	1	0.0141246	1	-0.0346274	1	-0.0435702	1	-0.0995193	1	-0.0404127	1	-0.0256773	-0.040801	1	1	FALSE
Atp6v0a2	0.0268037	1	-0.00619342	1	0.0856596	1	-0.0213543	1	0.0539364	1	0.00103367	1	0.000508959	1	-0.0502449	1	-0.0731922	1	0.0669624	1	0.0277704	-0.0109864	1	1	FALSE
Atp6v0b	0.137712	1	-0.112646	1	0.0886196	1	-0.231451	1	0.256832	0.00090405	0.201654	1	-0.0569876	1	-0.223621	1	0.0631066	1	0.258146	1	0.0278132	0.0484598	0.172206	1	FALSE
Atp6v0d1	0.0457143	1	0.0894437	1	0.167712	1	0.179495	1	0.0510974	1	-0.186461	1	-0.148298	1	0.0554647	1	-0.115996	1	0.0266851	1	0.106692	-0.0737209	1	1	FALSE
Atp6v0e	0.0106792	1	0.117994	1	0.208726	1	0.0538506	1	-0.0627842	1	0.201012	1	0.183621	1	0.298957	1	0.0489657	1	0.069455	1	0.0656932	0.160402	1	1	FALSE
Atp6v1a	0.118924	1	0.036435	1	0.0723534	1	-0.144929	1	0.143928	0.000409967	0.0461936	1	0.104351	1	-0.180983	1	-0.0902084	1	0.065579	1	0.0453424	-0.0110135	0.111706	1	FALSE
Atp6v1b2	0.0316737	1	-0.0391701	1	0.00554169	1	-0.10497	1	-0.00756292	1	-0.120609	1	-0.143718	1	-0.163633	1	-0.0478035	1	-0.00588843	1	-0.0228975	-0.0963306	1	1	FALSE
Atp6v1c1	0.041223	1	-0.0175555	1	0.0869611	1	-0.00263982	1	0.103657	1	0.114559	1	0.0513139	1	0.0691756	1	-0.254966	1	-0.248496	1	0.0423291	-0.0536827	1	1	FALSE
Atp6v1d	0.0723189	1	0.101556	1	-0.12551	1	0.0239433	1	0.136272	0.0934986	0.195463	1	-0.0961884	1	0.100454	1	-0.0321145	1	0.00828897	1	0.0417161	0.0351806	0.907879	1	FALSE
Atp6v1e1	-0.0439244	1	0.0330799	1	-0.010339	1	-0.117037	1	-0.106846	1	-0.0159168	1	-0.0842129	1	-0.0817652	1	-0.267452	1	-0.148381	1	-0.0490134	-0.119546	1	1	FALSE
Atp6v1f	0.189981	0.0981636	0.255295	0.0263704	0.13046	1	0.0578364	1	0.2418	7.63429e-07	0.258143	0.0177264	0.160746	1	0.01133	1	0.495878	1	0.195552	1	0.175074	0.22433	1.63761e-05	0.622449	FALSE
Atp6v1g1	-0.114438	1	-0.0330247	1	-0.146687	1	-0.336413	1	-0.0655921	1	-0.0667257	1	-0.0280059	1	0.268361	1	-0.318214	1	-0.0103715	1	-0.139231	-0.0309912	1	1	FALSE
Atp6v1h	0.0382421	1	-0.118856	0.6555	-0.145621	1	0.0907421	1	-0.0245853	1	-0.0739927	1	-0.129357	1	-0.0494813	1	-0.0534339	1	-0.0290202	1	-0.0320156	-0.0670571	0.999921	1	FALSE
Atp7a	0.00522738	1	-0.05399	0.0585747	0.0208617	1	0.0278783	1	-0.0160933	1	0.0359787	1	0.0409008	1	0.0081654	1	0.019885	1	-0.0352963	1	-0.00322318	0.0139267	0.841797	1	FALSE
Atp8a1	0.0262121	1	0.00491752	1	0.0219612	1	0.0423683	1	0.0279494	1	0.0197362	1	-0.0066053	1	0.0279405	1	0.0571736	1	0.02329	1	0.0246817	0.024307	1	1	FALSE
Atp8b2	-0.00682176	1	-0.0537293	1	0.0435336	1	0.0572002	1	-0.0217159	1	0.0269253	1	0.0104296	1	-0.0147832	1	0.073874	1	-0.0828324	1	0.00369335	0.00272265	1	1	FALSE
Atp9a	0.0133034	1	0.131655	1	0.0198308	1	0.174892	1	-0.0233738	1	0.0294714	1	0.143664	1	-0.0708345	1	0.109657	1	0.0237677	1	0.0632615	0.047145	1	1	FALSE
Atp9b	0.0370961	1	-0.0454662	1	-0.101898	1	-0.0116956	1	0.0135193	1	0.0309415	1	0.0121158	1	0.046131	1	0.0398377	1	0.00249822	1	-0.0216889	0.0263049	1	1	FALSE
Atpaf1	-0.00498862	1	-0.0124019	1	-0.0571554	1	-0.0555586	1	-0.00407683	1	0.003507	1	-0.0602975	1	0.0106956	1	0.100879	1	-0.0359288	1	-0.0268363	0.00377107	1	1	FALSE
Atpaf2	-0.0304421	1	-0.0132596	1	-0.0112239	1	-0.111765	1	0.00371153	1	-0.0328128	1	0.0178245	1	0.0377433	1	0.0477932	1	0.142799	1	-0.0325958	0.0426694	1	1	FALSE
Atpif1	-0.139303	0.0844126	-0.0462636	1	-0.0270262	1	0.171721	1	-0.22847	9.53207e-14	-0.0151143	1	-0.0384469	1	-0.0827616	1	-0.0392661	1	-0.076914	1	-0.0538682	-0.0505006	4.22251e-10	1	FALSE
Atr	0.0138438	1	-0.0549707	1	-0.0476823	1	-0.090052	1	-0.0135191	1	0.0205178	1	0.0197897	1	0.00246229	1	0.00720571	1	0.0502309	1	-0.0384761	0.0200413	1	1	FALSE
Atraid	0.183184	0.0804001	0.327111	0.0108622	0.497517	1	0.206492	1	0.145977	0.167046	0.320071	1.54637e-06	0.148637	0.512111	-0.0288982	1	0.262966	1	0.0748678	1	0.272056	0.155529	0.0608773	0.0017414	FALSE
Atrip	-0.0325643	1	-0.0418689	1	-0.0292757	1	-0.0691551	1	-0.0109633	1	0.0152976	1	0.0240146	1	0.0321065	1	-0.00777369	1	0.0488265	1	-0.0367654	0.0224943	1	1	FALSE
Atrn	0.0506134	1	-0.0226226	1	-0.0616595	1	-0.107368	1	-0.0442584	1	-0.00554005	1	-0.0047549	1	-0.0770562	1	0.0953283	1	0.0773652	1	-0.037059	0.0170685	1	1	FALSE
Atrnl1	0.0511495	1	-0.0391915	1	-0.082335	1	-0.0278535	1	0.0310143	1	0.0126953	1	0.0185143	1	0.0499481	1	0.0786906	1	-0.0486465	1	-0.0134432	0.0222403	1	1	FALSE
Atrx	-0.0613103	1	-0.175224	1	-0.203631	1	-0.178068	1	-0.11915	0.00981933	0.0390626	1	-0.0194837	1	-0.107039	1	0.00782682	1	-0.164955	1	-0.147477	-0.0489176	0.508852	1	FALSE
Atxn1	-0.102612	3.00511e-06	-0.00949878	1	-0.0136482	1	-0.129541	1	-0.13572	4.05322e-22	-0.0509598	1	-0.00209957	1	-0.0520214	1	-0.0803802	1	-0.0273631	1	-0.0782039	-0.0425648	7.99328e-22	1	FALSE
Atxn10	-0.149761	0.0445517	0.118755	1	-0.0895342	1	0.120519	1	-0.146935	8.25639e-07	-0.0127506	1	-0.0972141	1	0.122517	1	-0.237888	1	-0.114178	1	-0.0293912	-0.0679028	0.000168415	1	FALSE
Atxn1l	0.0337342	1	0.000914135	1	0.00541348	1	-0.0218833	1	-0.00310535	1	0.0011449	1	-0.0267714	1	-0.0121169	1	0.0197105	1	0.0802995	1	0.00301464	0.0124533	1	1	FALSE
Atxn2	-0.0499353	1	-0.0320925	1	-0.132611	1	-0.173726	1	-0.0512352	1	-0.0343143	1	-0.139137	1	-0.261948	1	-0.149843	1	0.061121	1	-0.08792	-0.104824	1	1	FALSE
Atxn2l	0.0226586	1	-0.165949	1	-0.0668829	1	-0.0488322	1	-0.0120225	1	-0.125591	1	-0.268086	1	-0.247955	1	-0.153853	1	0.0438516	1	-0.0542056	-0.150327	1	1	FALSE
Atxn3	0.0664328	1	-0.0145414	1	-0.0631172	1	-0.0762156	1	0.0389454	1	0.0571787	1	0.0928207	1	0.0522815	1	0.0463837	1	0.001379	1	-0.00969919	0.0500087	1	1	FALSE
Atxn7	-0.0460416	1	-0.0721361	0.301311	-0.159684	1	-0.0152217	1	-0.0377094	1	0.0209218	1	0.0143645	1	-0.0458677	1	0.0140482	1	-0.0443958	1	-0.0661586	-0.00818581	0.992264	1	FALSE
Atxn7l1	0.00595482	1	0.0595024	1	-0.040927	1	-0.00681552	1	-0.000403253	1	-0.0758693	1	-0.0165253	1	-0.0568368	1	0.026453	1	-0.0373517	1	0.0034623	-0.032026	1	1	FALSE
Atxn7l2	0.0138832	1	-0.0614676	0.519352	-0.0500962	1	0.0585163	1	-0.0262505	1	-0.00974672	1	0.0168894	1	-0.144944	1	-0.00880154	1	-0.026492	1	-0.013083	-0.0346189	0.999415	1	FALSE
Atxn7l3	-0.028075	1	0.0419331	1	-0.138445	1	-0.115073	1	0.00320872	1	0.0096588	1	-0.00485577	1	-0.00887493	1	0.00239266	1	-0.0327068	1	-0.0472901	-0.0068772	1	1	FALSE
Atxn7l3b	-0.0856744	1	0.174718	1	-0.0853648	1	-0.00973551	1	-0.103795	1	0.0240658	1	0.0423978	1	0.0681167	1	0.0969946	1	-0.0725677	1	-0.0219704	0.0318014	1	1	FALSE
AU019823	-0.0555867	1	0.0315293	1	0.0271878	1	0.00261441	1	0.0133777	1	-0.0513477	1	0.0735287	1	-0.119458	1	0.0655856	1	0.0463125	1	0.00382452	0.00292418	1	1	FALSE
AU020206	-0.087797	0.000468826	-0.115072	0.0155961	-0.108191	1	-0.0445257	1	-0.0339931	1	-0.019306	1	-0.0255899	1	-0.0240066	1	-0.0985629	1	-0.00159437	1	-0.0779156	-0.033812	0.00857957	1	FALSE
AU022252	0.00868344	1	-0.00967172	1	-0.0363542	1	0.0224699	1	-0.0281864	1	0.0210447	1	0.0158386	1	-0.0155197	1	-0.00467979	1	-0.00985489	1	-0.00861177	0.00136578	1	1	FALSE
AU040320	0.0539546	1	0.0169833	1	0.043144	1	0.0299914	1	0.0457214	1	0.041189	1	0.0151573	1	0.0499103	1	-0.0197438	1	0.00600971	1	0.037959	0.0185045	1	1	FALSE
AU041133	-0.0109137	1	-0.0108642	1	-0.0627867	1	0.00437396	1	-0.0281974	1	0.00246162	1	0.0161329	1	0.0170365	1	0.10691	1	0.0190437	1	-0.0216776	0.0323169	1	1	FALSE
Auh	0.0420338	1	0.0288108	1	0.0328038	1	0.106195	1	0.0284092	1	0.110946	1	0.0652964	1	-0.117735	1	0.0488002	1	0.0522833	1	0.0476506	0.0319182	1	1	FALSE
Aunip	-0.00994212	1	-0.017108	1	0.0374531	1	0.00546919	1	-0.00902199	1	-0.0322015	1	0.0151952	1	-0.00231596	1	0.0359528	1	0.0600591	1	0.00137004	0.0153379	1	1	FALSE
Aup1	0.00668813	1	0.0776242	1	-0.0262825	1	0.0306948	1	0.142049	4.39417e-06	0.0116943	1	0.0619458	1	0.0230048	1	0.0722534	1	0.170699	1	0.0461547	0.0679194	0.00600639	1	FALSE
Aurka	0.00294984	1	-0.0260051	1	0.10706	1	-0.0287044	1	0.0244843	1	-0.0259936	1	-0.0782905	1	-0.29066	1	0.0310611	1	0.0830032	1	0.0159569	-0.0561759	1	1	FALSE
Aurkaip1	-0.062482	1	0.0342223	1	0.144365	1	0.143351	1	0.0161376	1	0.0841903	0.445782	0.162521	1	0.0685773	1	-0.134704	1	0.146107	1	0.0551187	0.0653382	1	0.998527	FALSE
Aurkb	-0.0626751	1	0.0171653	1	0.0649932	1	0.0992459	1	0.074065	1	0.0143139	1	-0.0375118	1	-0.16927	1	0.0738035	1	-0.0020796	1	0.0385588	-0.0241489	1	1	FALSE
Aven	-0.0381529	1	-0.0458233	1	-0.0139255	1	-0.013382	1	-0.0145702	1	0.025979	1	-0.0207141	1	-0.0397858	1	2.29233e-05	1	-0.00091262	1	-0.0251708	-0.00708213	1	1	FALSE
Avl9	0.0405556	1	0.0186603	1	0.0114124	1	-0.177996	1	-0.0276956	1	-0.0676066	1	0.0750811	1	-0.0282354	1	0.0857431	1	0.00794455	1	-0.0270127	0.0145854	1	1	FALSE
Avpi1	0.183584	1	0.209899	1	0.253683	1	0.00652983	1	0.5159	1.38194e-31	0.197634	1	0.276914	0.109728	-0.00877989	1	-0.0443147	1	0.355554	1	0.233919	0.155401	1.55412e-25	0.926445	FALSE
AW112010	-0.995828	1.01994e-37	-0.769718	1.61586e-05	-1.05675	1	-0.91975	0.400884	-1.17348	1.23602e-80	-0.894132	4.43542e-07	-0.287102	0.162058	-0.31237	1	0.379378	1	-0.643325	1	-0.983104	-0.35151	2.1556e-114	0.000283506	TRUE
AW209491	0.0164173	1	-0.0285279	1	0.0605283	1	0.0588721	1	-0.00449526	1	0.0300938	1	0.0171941	1	0.0153448	1	-0.0631722	1	0.00518647	1	0.0205589	0.000929413	1	1	FALSE
AW549877	0.00433418	1	-0.0461343	1	-0.0270261	1	-0.0873495	1	-0.0188038	1	0.110397	1	-0.0706278	1	0.0623275	1	0.0171407	1	-0.00296121	1	-0.0349959	0.0232552	1	1	FALSE
AW554918	-0.0163806	1	-0.0472339	1	-0.0322376	1	-0.0395013	1	-0.0196309	1	0.019488	1	0.00303341	1	0.0236863	1	-0.00578526	1	0.0367964	1	-0.0309969	0.0154438	1	1	FALSE
Axin1	0.0765943	1	0.0278335	1	-0.0175639	1	-0.0177083	1	-0.0410345	1	-0.0273328	1	-0.0355754	1	-0.2672	1	-0.0211834	1	-0.218566	1	0.00562422	-0.113972	1	1	FALSE
Axl	0.230352	1	-0.0600903	1	0.0361248	1	0.124487	1	0.150968	0.682638	0.155574	1	-0.0486063	1	0.132307	1	0.306939	1	0.210423	1	0.0963682	0.151327	0.999951	1	FALSE
AY036118	0.381267	1	0.405294	1	0.608701	1	0.108521	1	0.00106772	1	-1.23932	2.1344e-11	-2.12036	6.32772e-08	-0.225328	1	-2.15332	1	-1.68793	1	0.30097	-1.48525	1	1.78176e-13	FALSE
Azi2	-0.0700838	1	-0.0999374	1	-0.14713	1	0.106776	1	-0.0699861	1	-0.13818	1	-0.0462232	1	-0.03463	1	-0.0383287	1	0.117594	1	-0.0560723	-0.0279536	1	1	FALSE
Azin1	0.0350484	1	-0.0496277	1	-0.221831	1	0.0767018	1	-0.00225826	1	-0.102678	1	0.0477357	1	0.341429	1	0.0596721	1	0.00236783	1	-0.0323934	0.0697053	1	1	FALSE
Azin2	0.206235	1	0.272896	1	0.113848	1	0.22819	1	0.324706	2.61978e-13	0.122297	1	-0.00538753	1	-0.112395	1	-0.225326	1	-0.119926	1	0.229175	-0.0681473	8.8686e-09	1	FALSE
B230118H07Rik	-0.0429495	0.903104	0.0213449	1	-0.0384967	1	-0.0146163	1	-0.0338783	0.406519	0.0265754	1	-0.0461169	1	-0.026212	1	0.113238	1	0.0310084	1	-0.0217192	0.0196985	0.996309	1	FALSE
B230219D22Rik	0.139119	1	-0.158022	1	-0.0371689	1	-0.0160438	1	0.0206796	1	-0.0573397	1	0.0615872	1	-0.00650262	1	-0.0129662	1	-0.00934008	1	-0.0102872	-0.00491228	1	1	FALSE
B230307C23Rik	0.0166822	1	-0.0225108	1	-0.02671	1	-0.0125408	1	-0.0280716	1	0.0197833	1	-0.00450967	1	-0.0382995	1	0.050532	1	0.07245	1	-0.0146302	0.0199912	1	1	FALSE
B230354K17Rik	0.0414084	1	-0.00322573	1	0.00912076	1	-0.066009	1	0.0164975	1	-0.0231367	1	0.0188878	1	-0.0136083	1	0.0230995	1	0.0495959	1	-0.000441602	0.0109677	1	1	FALSE
B2m	-0.850321	1.45041e-37	-0.606311	3.63015e-11	-0.759109	0.620831	-1.22243	0.000199074	-1.07087	1.26207e-96	-0.445448	2.89546e-07	-0.389248	0.215037	-0.884634	0.00114499	-0.486088	1	-0.510687	0.0337614	-0.901808	-0.543221	4.55577e-139	5.99793e-08	TRUE
B3galnt2	-0.01659	1	-0.0831547	0.0795527	-0.0533821	1	-0.0595486	1	-0.0396706	0.410771	-0.020377	1	-0.0542533	1	0.0142598	1	0.00806047	1	-0.0225354	1	-0.0504692	-0.0149691	0.740262	1	FALSE
B3galt6	0.0109964	1	0.0051513	1	0.110371	1	-0.00624464	1	0.020956	1	0.0511085	1	-0.0358039	1	-9.47254e-05	1	0.0680511	1	0.0228878	1	0.028246	0.0212297	1	1	FALSE
B3gat3	-0.0082541	1	0.000768784	1	0.0979114	1	0.0118819	1	0.00253497	1	0.160327	1	-0.00342475	1	-0.00615647	1	0.0541382	1	0.125819	1	0.0209686	0.0661405	1	1	FALSE
B3glct	0.0338451	1	0.0146957	1	0.0635871	1	-0.000809704	1	-0.0217392	1	0.00376251	1	0.00801052	1	-0.051992	1	0.0351817	1	0.0201613	1	0.0179158	0.0030248	1	1	FALSE
B3gnt2	-0.00223138	1	-0.043886	1	-0.00303753	1	-0.037723	1	-0.0276009	1	0.0149368	1	-0.0451806	1	0.0771843	1	0.0945863	1	0.0604667	1	-0.0228958	0.0403987	1	1	FALSE
B3gnt3	0.0051065	1	0.0482807	1	0.125209	1	0.0358466	1	0.0322443	1	0.015317	1	0.0471917	1	0.0222042	1	0.0619457	1	-0.00397434	1	0.0493373	0.0285369	1	1	FALSE
B4galnt1	-0.164373	6.32e-06	-0.078275	1	-0.315526	1	-0.103754	1	-0.226965	4.5856e-14	-0.195401	1	-0.189179	1	-0.00136692	1	-0.120433	1	-0.259581	1	-0.177779	-0.153192	4.41204e-14	1	FALSE
B4galnt4	-0.0164122	1	-0.0110907	1	-0.0164755	1	0.00797179	1	0.00136537	1	-0.00719118	1	-0.0428858	1	-0.0131782	1	-0.128455	1	-0.0278068	1	-0.00692823	-0.0439034	1	1	FALSE
B4galt1	-0.146978	0.862345	0.102236	1	0.00349382	1	0.0608481	1	-0.155168	3.40765e-05	-0.32287	1	-0.376874	1	-0.524153	1	-0.367946	1	-0.271216	1	-0.0271135	-0.372612	0.0220185	1	FALSE
B4galt2	-0.0497885	1	0.00188801	1	0.00823226	1	0.0317322	1	-0.0573422	3.6211e-06	-0.0758117	1	-0.0115796	1	0.0244326	1	-0.0830212	1	-0.0511178	1	-0.0130556	-0.0394195	0.00523763	1	FALSE
B4galt3	-0.0166933	1	-0.118303	1	0.0213603	1	-0.105671	1	-0.0873417	0.00818265	-0.0894464	1	-0.00846231	1	-0.0160627	1	-0.339113	1	-0.341892	1	-0.0613298	-0.158995	0.475215	1	FALSE
B4galt4	0.00790527	1	-0.0110185	1	-0.04163	1	0.00218889	1	-0.015286	1	-0.00376234	1	0.00190752	1	-0.0139837	1	0.0471163	1	-0.0174723	1	-0.0115681	0.0027611	1	1	FALSE
B4galt5	0.0965879	1	0.0632607	1	0.00301227	1	0.00543773	1	0.122943	1	0.0469719	1	-0.0428487	1	-0.113628	1	-0.109545	1	-0.138546	1	0.0582483	-0.071519	1	1	FALSE
B4galt7	-0.0254851	1	-0.0308753	1	-0.0152716	1	-0.0411901	1	-0.0210184	1	0.00765077	1	0.00139848	1	-0.0260734	1	0.0635028	1	0.0461153	1	-0.0267681	0.0185188	1	1	FALSE
B4gat1	0.0947328	1	0.0898529	1	0.00148262	1	0.0276152	1	0.196262	5.7341e-10	-0.0587524	1	-0.03893	1	0.0332795	1	-0.0564375	1	0.0652477	1	0.0819892	-0.0111185	5.96229e-06	1	FALSE
B930036N10Rik	0.0409017	1	-0.00878438	1	0.024145	1	-0.0714396	1	-0.00696142	1	-0.00126478	1	-0.0820487	1	-0.00754239	1	0.044313	1	-0.0150178	1	-0.00442773	-0.0123121	1	1	FALSE
B9d1	0.00440624	1	0.0378493	1	0.0919074	1	0.275601	1	0.0318931	1	0.0959302	1	0.0366236	1	0.194942	1	0.0754684	1	0.00625252	1	0.0883314	0.0818433	1	1	FALSE
B9d2	0.020454	1	0.08432	1	0.0585342	1	0.00182198	1	0.0399195	1	0.158404	0.00928568	0.010452	1	0.086862	1	0.0686245	1	0.065407	1	0.0410099	0.0779499	1	0.498446	FALSE
Babam1	-0.0072091	1	0.0655654	1	0.279774	1	0.0289737	1	0.0530774	1	0.150578	1	0.126609	1	0.197619	1	0.112318	1	0.021978	1	0.0840363	0.12182	1	1	FALSE
Babam2	0.044932	1	0.0176096	1	0.151811	1	0.115244	1	0.0631989	1	-0.234357	1	0.0573883	1	0.220405	1	0.0871934	1	0.139569	1	0.0785591	0.0540398	1	1	FALSE
Bace1	-0.0764404	0.806771	0.00445219	1	-0.0794403	1	0.0424591	1	-0.190988	2.78927e-18	-0.0687283	1	-0.181067	1	-0.174661	1	0.0154625	1	-0.131832	1	-0.0599915	-0.108165	2.82769e-13	1	FALSE
Bach1	0.0263848	1	-0.052466	1	-0.0738837	1	-0.0629692	1	-0.0585356	1	-0.014762	1	-0.0129669	1	-0.104315	1	-0.184821	1	0.00612652	1	-0.0442939	-0.0621478	1	1	FALSE
Bad	-0.073812	1	0.0635345	1	0.0997649	1	0.114943	1	0.0158739	1	0.0567107	1	0.0817927	1	-0.316907	1	0.0353689	1	0.177783	1	0.0440609	0.00694952	1	1	FALSE
Bag1	-0.106043	1	-0.0601425	1	-0.231158	1	0.110067	1	-0.136634	0.00010417	0.0376206	1	0.162652	1	0.0113065	1	0.0263079	1	0.0685448	1	-0.0847821	0.0612864	0.049508	1	FALSE
Bag2	0.00308534	1	0.113366	1	-0.14893	1	-0.0210644	1	-0.0732592	0.00701871	-0.0714549	1	0.0368323	1	0.112579	1	-0.187827	1	-0.152039	1	-0.0253604	-0.052382	0.447686	1	FALSE
Bag3	0.0277673	1	-0.035761	1	-0.199753	1	-0.0310918	1	0.00302883	1	-0.117191	1	-0.0757751	1	-0.108148	1	-0.140985	1	-0.264559	1	-0.0471619	-0.141331	1	1	FALSE
Bag4	0.0128108	1	-0.0253801	1	-0.116563	1	-0.0796967	1	0.0166073	1	-0.00482192	1	-0.0439371	1	-0.0246781	1	0.0619765	1	0.01751	1	-0.0384443	0.00120987	1	1	FALSE
Bag5	-0.0437574	1	0.0682535	1	-0.135186	1	0.00540001	1	-0.0231198	1	0.0808043	1	0.0747359	1	-0.0338057	1	0.130903	1	-0.0636875	1	-0.025682	0.03779	1	1	FALSE
Bag6	-0.0411018	1	-0.0618748	1	-0.0862986	1	0.000870432	1	-0.0478661	1	-0.0772811	1	0.0228072	1	-0.281074	1	0.045418	1	0.00288577	1	-0.0472542	-0.0574489	1	1	FALSE
Bahd1	-0.0102355	1	0.0138408	1	0.0100257	1	-0.0278901	1	0.00145257	1	0.0122716	1	-0.00705608	1	0.0109835	1	0.00982179	1	0.0100469	1	-0.00256132	0.00721355	1	1	FALSE
Baiap2	0.26716	0.0437757	0.359256	0.0715637	0.219727	1	0.250827	1	0.20298	8.3179e-06	0.225437	0.584345	0.143278	1	0.184396	1	-0.200266	1	0.0521778	1	0.25999	0.0810045	0.000128554	0.999761	FALSE
Baiap2l1	-0.00592142	1	0.0708229	1	-0.0753999	1	0.0411611	1	-0.010243	1	-0.0391854	1	0.0240309	1	0.0123201	1	-0.000107941	1	-0.0339277	1	0.00408394	-0.00737401	1	1	FALSE
Bak1	-0.138054	4.3984e-05	-0.164814	0.0225586	-0.156515	1	0.0430489	1	-0.124453	4.67135e-10	-0.0685345	1	-0.0307031	1	0.341003	1	-0.168408	1	-0.0315848	1	-0.108157	0.00835461	3.37195e-11	1	FALSE
Banf1	-0.0191499	1	-0.204313	1	0.0669173	1	0.311997	1	0.114259	1	0.0530037	1	-0.0605584	1	0.109747	1	-0.0748422	1	0.130503	1	0.0539422	0.0315706	1	1	FALSE
Banp	-0.0643988	0.474408	-0.0216279	1	-0.128546	1	-0.119822	1	-0.0552463	1	-0.173972	1	-0.0184672	1	0.0369834	1	-0.0372546	1	-0.0500941	1	-0.0779282	-0.0485609	0.998962	1	FALSE
Bap1	0.0276727	1	-0.0133885	1	-0.0602417	1	-0.0390441	1	0.00220555	1	0.0367652	1	-0.14392	1	0.0494124	1	0.0353606	1	-0.0233316	1	-0.0165592	-0.00914278	1	1	FALSE
Bard1	-0.018102	1	-0.0171156	1	-0.0922743	1	-0.0466434	1	-0.0219252	1	-0.0302695	1	-0.00874806	1	-0.0366488	1	-0.0610589	1	0.0320416	1	-0.0392121	-0.0209367	1	1	FALSE
Basp1	-0.0181279	1	0.452919	1	0.195718	1	0.431159	1	0.138383	1	-0.199709	1	0.353415	1	-0.201766	1	0.27476	1	-0.335963	1	0.24001	-0.0218525	1	1	FALSE
Batf3	-0.0090894	1	-0.0108921	1	0.00645229	1	0.0109107	1	0.00171029	1	0.0591239	1	0.0522152	1	-0.0575426	1	-0.0293311	1	-0.109638	1	-0.000181632	-0.0170345	1	1	FALSE
Bax	-0.0532887	1	-0.026326	1	-0.00932544	1	0.0540977	1	0.0527434	1	0.257488	0.161857	0.106334	1	-0.0806241	1	0.118251	1	-0.18398	1	0.00358019	0.0434938	1	0.962052	FALSE
Baz1a	-0.0328751	1	-0.108899	1	-0.166107	1	-0.0863591	1	0.0623012	1	-0.222901	1	-0.0351582	1	-0.316459	1	0.0326644	1	-0.0484181	1	-0.0663879	-0.118054	1	1	FALSE
Baz1b	-0.0585975	1	-0.0757822	1	-0.380226	1	-0.12465	1	-0.0301415	1	0.0698048	1	-0.112595	1	-0.0904735	1	0.11324	1	-0.12309	1	-0.133879	-0.0286228	1	1	FALSE
Baz2a	0.0121113	1	-0.0591568	1	-0.0711453	1	-0.0753456	1	-0.043165	1	-0.0808155	1	0.058139	1	-0.0931734	1	0.0390557	1	-0.0573394	1	-0.0473403	-0.0268267	1	1	FALSE
Baz2b	-0.0639966	1	-0.122694	1	-0.104271	1	-0.0333214	1	-0.0641135	1	0.0487149	1	-0.17884	1	-0.0015854	1	0.0913328	1	0.0766679	1	-0.0776792	0.00725811	1	1	FALSE
Bbc3	-0.12593	0.0872376	-0.092724	1	-0.053224	1	-0.166187	1	-0.112316	7.17359e-12	0.00452608	1	-0.00392956	1	-0.0573092	1	-0.0588623	1	0.0646019	1	-0.110076	-0.0101946	1.88364e-08	1	FALSE
Bbip1	0.0913578	1	-0.0979445	1	0.172122	1	0.181877	1	-0.0442764	1	0.0842207	1	0.0657239	1	-0.182793	1	-0.151336	1	0.142826	1	0.060627	-0.00827181	1	1	FALSE
Bbs2	0.0100168	1	-0.0156386	1	0.0550668	1	0.0442093	1	0.00494767	1	0.0316235	1	0.0833888	1	0.0360525	1	-0.00247995	1	-0.00962989	1	0.0197204	0.027791	1	1	FALSE
Bbs4	0.01181	1	0.0213744	1	0.0674829	1	0.00523292	1	-0.00266508	1	-0.00140352	1	-0.0454318	1	-0.0130601	1	0.025451	1	0.0111477	1	0.020647	-0.00465934	1	1	FALSE
Bbs5	-0.00188762	1	-0.0123819	1	-0.0057852	1	-0.00959158	1	-0.00746914	1	0.00655607	1	-0.00351627	1	0.0146499	1	-0.00980091	1	0.00170122	1	-0.00742308	0.00191801	1	1	FALSE
Bbs7	0.0189467	1	-0.0249128	1	-0.0271573	1	-0.00462764	1	-0.0115145	1	0.0264855	1	-0.025556	1	-0.0132783	1	0.0224534	1	0.0355714	1	-0.00985311	0.00913521	1	1	FALSE
Bbs9	-0.00767027	1	0.0203919	1	-0.00262165	1	-0.0492774	1	-0.00487873	1	-0.0276449	1	-0.0127929	1	0.00690591	1	0.0105251	1	0.0350004	1	-0.00881123	0.00239872	1	1	FALSE
Bbx	0.0244664	1	0.126973	1	-0.142144	1	-0.0254673	1	-0.0247535	1	-0.0479794	1	0.0333815	1	-0.204293	1	0.0602006	1	-0.0355766	1	-0.00818511	-0.0388533	1	1	FALSE
BC002059	0.017058	1	-0.0381756	1	0.00697226	1	0.0142484	1	0.0132465	1	-0.0393104	1	-0.0291881	1	0.0146808	1	0.0363754	1	0.0641165	1	0.00266992	0.00933482	1	1	FALSE
BC003331	-0.0182999	1	-0.0420173	1	-0.146234	1	0.0677553	1	-0.0188149	1	-0.0963965	1	-0.0731362	1	0.139489	1	0.00520695	1	0.152101	1	-0.0315221	0.025453	1	1	FALSE
BC003965	-0.0399345	1	-0.153486	1	-0.0448155	1	0.00388109	1	-0.0166507	1	0.10547	1	0.025439	1	-0.0312565	1	0.0422575	1	-0.30351	1	-0.0502011	-0.0323199	1	1	FALSE
BC004004	0.104994	1	-0.024438	1	0.0843878	1	0.189771	1	-0.0454784	1	-0.0570755	1	-0.0726719	1	0.0549896	1	0.122043	1	0.147324	1	0.0618474	0.0389217	1	1	FALSE
BC005537	0.15066	1	-0.136117	1	0.102683	1	0.0317852	1	0.0167079	1	0.143115	1	-0.109616	1	0.0346968	1	0.144763	1	-0.104702	1	0.0331437	0.0216514	1	1	FALSE
BC005561	-0.00906965	1	-0.178457	0.390522	-0.126081	1	-0.151428	1	-0.143605	0.00012149	0.0167976	1	-0.072505	1	-0.0631617	1	0.14673	1	0.0682874	1	-0.121728	0.0192296	0.030097	1	FALSE
BC005624	0.00623438	1	0.066102	1	-0.0515906	1	0.0811514	1	-0.066115	1	-0.147356	1	-0.0228229	1	0.0761535	1	0.161455	1	-0.0627568	1	0.00715643	0.000934616	1	1	FALSE
BC017643	0.008651	1	-0.0819594	1	-0.065492	1	0.0910006	1	-0.0173413	1	0.017988	1	0.0373326	1	-0.0479077	1	-0.09328	1	0.00586914	1	-0.0130282	-0.0159996	1	1	FALSE
BC022687	0.0101098	1	-0.0323525	1	0.0487674	1	0.0459905	1	0.0389039	1	0.0360086	1	0.0183116	1	-0.015484	1	-0.0252982	1	-0.0345657	1	0.0222838	-0.00420553	1	1	FALSE
BC024978	-0.00931119	1	0.00883983	1	-0.00829391	1	0.0153477	1	0.00649342	1	-0.00266312	1	-0.00343271	1	-0.0163761	1	-0.00970445	1	0.0155251	1	0.00261516	-0.00333025	1	1	FALSE
BC029722	0.0449191	1	0.0337515	1	0.146643	1	0.142191	1	0.0322828	1	0.122483	0.0444437	-0.00963773	1	0.135339	1	0.042411	1	0.0769543	1	0.0799575	0.07351	1	0.795839	FALSE
BC030867	-0.0179488	1	0.0190229	1	-0.0137266	1	0.0173921	1	0.0274712	1	0.00467866	1	-0.0150343	1	-0.0217934	1	0.00198018	1	0.0313412	1	0.00644216	0.000234479	1	1	FALSE
BC031181	0.0217661	1	0.0497309	1	0.0720813	1	0.158744	1	-0.00087714	1	-0.059626	1	-0.137041	1	0.0759719	1	-0.069417	1	-0.0370753	1	0.060289	-0.0454375	1	1	FALSE
BC037034	-0.0260528	1	-0.0336681	1	-0.0292782	1	-0.064518	1	-0.00600752	1	-0.00752772	1	-0.0118402	1	-3.14242e-05	1	-0.0176618	1	0.0539687	1	-0.0319049	0.00338152	1	1	FALSE
BC052040	-0.00514976	1	-0.0316757	1	0.00291726	1	-0.00724885	1	-0.00153499	1	-0.232211	1	-0.0107996	1	-0.0272546	1	0.0234028	1	0.00279183	1	-0.0085384	-0.0488141	1	1	FALSE
BC055324	-0.007982	1	0.0433754	1	0.00226958	1	-0.0118914	1	-0.0025328	1	-0.00967602	1	-0.00412654	1	-0.0269834	1	0.00118251	1	0.0241734	1	0.00464774	-0.003086	1	1	FALSE
Bcam	-0.0452954	0.0109163	-0.0228109	1	-0.0864723	1	0.128397	1	-0.0492077	7.43732e-05	-0.0644878	0.00013292	-0.0216355	1	-0.0681288	1	-0.0514423	1	-0.0394923	1	-0.0150779	-0.0490374	0.00177369	0.0575205	FALSE
Bcap29	-0.00118326	1	-0.0462559	1	0.0505271	1	-0.0122526	1	0.0373861	1	0.00178756	1	0.0476724	1	-0.0087347	1	0.0652169	1	0.0517011	1	0.00564429	0.0315287	1	1	FALSE
Bcap31	-0.0183299	1	0.103411	1	0.333066	1	0.266034	1	-0.00774874	1	0.0981007	1	0.141293	1	0.0233373	1	-0.00616244	1	-0.0517593	1	0.135287	0.0409619	1	1	FALSE
Bcar1	-0.0264524	1	-0.0235157	1	0.0485331	1	-0.0418527	1	-0.0287517	1	-0.155423	1	-0.00433426	1	-0.284783	1	-0.165769	1	-0.0252031	1	-0.0144079	-0.127102	1	1	FALSE
Bcar3	-0.0815832	1	-0.0985058	1	-0.24696	1	-0.147798	1	-0.032904	1	-0.0497782	1	0.00783791	1	-0.117767	1	-0.157916	1	-0.0682913	1	-0.12155	-0.077183	1	1	FALSE
Bcas2	-0.0163065	1	-0.0242578	1	-0.0368846	1	-0.055046	1	-0.0323692	1	-0.125853	1	0.0816739	1	-0.164335	1	-0.120405	1	-0.0503014	1	-0.0329728	-0.075844	1	1	FALSE
Bcas3	-0.00934895	1	-0.0199495	1	-0.0120078	1	-0.0638778	1	0.00095101	1	-0.134683	1	0.00136339	1	0.0458634	1	-0.0832782	1	0.0158923	1	-0.0208466	-0.0309683	1	1	FALSE
Bcat2	-0.0524341	0.00178864	-0.0537011	1	-0.090543	1	-0.0218476	1	-0.059217	5.20097e-15	0.0183621	1	-0.0446981	1	-0.0394403	1	-0.0726622	1	-0.145418	1	-0.0555486	-0.0567714	1.01781e-12	1	FALSE
Bccip	-0.13667	5.33592e-05	-0.185309	0.097397	-0.128531	1	-0.108643	1	-0.0936796	0.0137007	-0.0354404	1	-0.162143	1	-0.30632	1	-0.099132	1	-0.140673	1	-0.130567	-0.148742	0.00028144	1	FALSE
Bcdin3d	0.0418794	1	0.00458422	1	0.0174139	1	0.0404154	1	0.00911354	1	0.00826589	1	0.0391491	1	-0.000210109	1	0.0010482	1	0.0385142	1	0.0226813	0.0173535	1	1	FALSE
Bckdha	0.0364453	1	0.060371	1	0.0488197	1	0.0341633	1	-0.0105428	1	0.0865722	1	0.0322605	1	-0.125673	1	0.119046	1	0.177177	1	0.0338513	0.0578765	1	1	FALSE
Bckdhb	-0.0364852	0.153454	-0.0675112	0.0269123	-0.0952487	1	-0.0907661	1	-0.0512477	5.24483e-08	-0.0235839	1	-0.0960102	1	-0.0503988	1	-0.125998	1	0.0326689	1	-0.0682518	-0.0526644	2.66957e-06	1	FALSE
Bckdk	-0.0491627	1	0.0204268	1	-0.00166519	1	0.156825	1	-0.0603509	0.0289518	0.0337979	1	-0.0567791	1	0.122607	1	-0.00238687	1	0.0432636	1	0.0132146	0.0281006	0.717468	1	FALSE
Bcl10	-0.122284	1	-0.0825074	1	-0.187468	1	-0.17364	1	-0.191293	6.2305e-06	-0.244848	1	-0.195264	1	-0.391158	1	-0.340895	1	-0.281085	1	-0.151439	-0.29065	0.00767477	1	FALSE
Bcl11a	0.0420367	1	0.0986949	1	0.0217625	1	-0.0246081	1	0.0462194	1	0.0249306	1	-0.0367159	1	0.0237673	1	0.136083	1	0.0464506	1	0.0368211	0.0389031	1	1	FALSE
Bcl2	-0.184877	1.37593e-08	-0.114621	0.164344	-0.0417377	1	0.00774717	1	-0.326877	3.1579e-45	-0.157362	0.0144637	-0.197623	1	-0.13656	1	-0.225469	1	-0.0997103	1	-0.132073	-0.163345	6.89609e-47	0.582813	FALSE
Bcl2l1	0.0179082	1	-0.0227822	1	0.0624458	1	-0.026166	1	-0.0200041	1	0.0752065	1	0.00985608	1	-0.00415332	1	-0.0278596	1	-0.0777944	1	0.00228032	-0.00494894	1	1	FALSE
Bcl2l11	0.218734	0.00166787	0.281992	1	0.192032	1	0.294493	1	0.146145	0.047206	-0.0583501	1	0.0865625	1	-0.0508165	1	0.226047	1	0.132185	1	0.226679	0.0671256	0.0415659	1	FALSE
Bcl2l12	-0.00684636	1	-0.02934	1	-0.0609461	1	0.0259866	1	-0.0433244	1	-0.0883413	1	-0.0429123	1	0.0263918	1	-0.129422	1	-0.0145711	1	-0.0228941	-0.0497711	1	1	FALSE
Bcl2l13	0.000954429	1	-0.0659688	1	0.0173811	1	-0.0882148	1	-0.0122405	1	-0.0257738	1	-0.124572	1	-0.0572522	1	-0.0163388	1	0.012211	1	-0.0296177	-0.0423451	1	1	FALSE
Bcl2l2	0.0191759	1	-0.0290871	1	-0.0229293	1	0.01252	1	0.00269023	1	-0.013947	1	-0.0137594	1	0.0241666	1	-0.0500323	1	0.0279189	1	-0.00352605	-0.00513064	1	1	FALSE
Bcl3	0.0435375	1	0.0972684	1	-0.0316183	1	-0.00247936	1	0.067301	1	0.0572556	1	-0.0116888	1	-0.0348844	1	-0.0292563	1	-0.0783954	1	0.0348018	-0.0193938	1	1	FALSE
Bcl6	0.0852545	1	0.0111632	1	0.116971	1	0.0327113	1	0.0666441	1	-0.0141179	1	0.0632849	1	0.00388789	1	0.0758595	1	0.00883294	1	0.0625487	0.0275495	1	1	FALSE
Bcl7a	-0.0302001	1	-0.0166828	1	-0.0982416	1	-0.0100832	1	-0.00259098	1	0.015975	1	-0.0397569	1	-0.0557468	1	0.043635	1	0.00224814	1	-0.0315597	-0.00672912	1	1	FALSE
Bcl7b	0.0855213	1	0.021822	1	0.0720308	1	0.194936	1	0.0486014	1	-0.00881296	1	-0.0106796	1	0.0354187	1	0.0546732	1	-0.0953675	1	0.0845823	-0.00495363	1	1	FALSE
Bcl7c	-0.253972	3.72124e-08	-0.12595	1	-0.183115	1	0.116689	1	-0.263403	2.08771e-19	-0.136141	1	-0.0340874	1	0.0322991	1	-0.0413339	1	-0.402043	1	-0.14195	-0.116261	4.52463e-21	1	FALSE
Bcl9	-0.0969502	0.0015131	-0.055073	1	-0.235058	1	0.00834559	1	-0.178913	1.20699e-24	-0.298171	1	-0.093846	1	-0.0853746	1	0.115072	1	-0.114872	1	-0.11153	-0.0954385	1.16798e-21	1	FALSE
Bcl9l	0.119032	1	0.0589905	1	0.0414022	1	0.0666233	1	0.0178198	1	-0.00942322	1	0.0125822	1	-0.202564	1	0.228623	1	-0.0612574	1	0.0607736	-0.00640788	1	1	FALSE
Bclaf1	-0.219111	0.00491823	-0.375434	0.000131652	-0.42688	1	-0.258509	1	-0.210688	8.08643e-08	-0.0190071	1	-0.0782515	1	-0.154699	1	0.0959428	1	-0.0353811	1	-0.298124	-0.0382793	2.18366e-09	1	FALSE
Bclaf3	-0.00458543	1	-0.0484582	1	-0.049882	1	0.0798146	1	-0.0286178	1	0.03655	1	-0.010365	1	-0.0562072	1	0.135199	1	0.0368044	1	-0.0103458	0.0283962	1	1	FALSE
Bcor	-0.00839129	1	0.0063009	1	-0.141238	1	-0.048161	1	0.0104327	1	0.0235586	1	0.0469983	1	-0.131275	1	0.0138095	1	0.0416499	1	-0.0362113	-0.00105165	1	1	FALSE
Bcorl1	-0.027311	1	-0.0537805	1	-0.0673836	1	-0.0906185	1	-0.0526375	0.182701	-0.00134386	1	0.0130282	1	-0.0352521	1	-0.011126	1	-0.00811712	1	-0.0583462	-0.00856216	0.970391	1	FALSE
Bcr	0.112459	1	0.11206	1	-0.0914191	1	0.134254	1	0.0860492	1	0.0156821	1	0.0869493	1	0.0023748	1	0.0461337	1	0.102371	1	0.0706806	0.0507022	1	1	FALSE
Bcs1l	-0.0343099	1	0.0232166	1	-0.0457115	1	-0.0385709	1	-0.0339148	1	-0.0852596	1	-0.0388065	1	-0.0202546	1	0.0889376	1	0.0110502	1	-0.0258581	-0.00886657	1	1	FALSE
Bdkrb2	-0.0564382	0.00695687	-0.0625419	1	0.00669567	1	-0.0787545	1	-0.0515344	5.2878e-07	-0.0280036	1	-0.0212495	1	0.0461571	1	-0.0322453	1	-0.0227778	1	-0.0485146	-0.0116238	2.70639e-05	1	FALSE
Bdnf	0.0371759	1	0.108647	1	0.0763201	1	-0.124251	1	-0.11874	9.49877e-05	0.132192	1	0.238661	0.00344382	-0.0338316	1	0.336344	1	-0.0240992	1	-0.00416973	0.129853	0.046749	0.331475	FALSE
Bdp1	-0.000897814	1	-0.0506142	1	-0.150833	1	-0.256025	1	-0.056789	1	-0.0424371	1	0.0280563	1	-0.0686604	1	0.191998	1	-0.158606	1	-0.103032	-0.00992991	1	1	FALSE
Becn1	0.0149959	1	-0.0184766	1	-0.0751359	1	-0.19154	1	0.070988	1	-0.0301155	1	-0.0667562	1	-0.265059	1	0.0519758	1	0.0111903	1	-0.0398338	-0.0597528	1	1	FALSE
Bend3	-0.0213623	1	-0.0323241	1	-0.0468491	1	-0.0107384	1	-0.0145949	1	-0.024226	1	-0.00643094	1	0.0264189	1	-0.0370548	1	-0.00502402	1	-0.0251738	-0.00926337	1	1	FALSE
Bend4	0.0314196	1	-0.0281035	1	-0.102455	1	-0.0647899	1	0.0100697	1	0.00718319	1	-0.00585604	1	-0.0498494	1	-0.0116461	1	-0.0383835	1	-0.0307718	-0.0197104	1	1	FALSE
Bend5	-0.0419914	1	0.0642911	1	-0.0432805	1	0.141808	1	-0.161863	4.26569e-11	-0.0239056	1	0.075464	1	0.00700487	1	0.126628	1	-0.151519	1	-0.00820716	0.00673449	6.87784e-07	1	FALSE
Bet1	-0.111299	0.0125975	-0.0475015	1	-0.112762	1	-0.0392668	1	-0.190251	8.32567e-18	-0.0889534	1	-0.194473	1	-0.171281	1	0.0469035	1	-0.0683192	1	-0.100216	-0.0952246	1.75033e-14	1	FALSE
Bet1l	-0.0226217	1	-0.0374901	1	-0.00959392	1	-0.031454	1	-0.0199062	1	-0.0513491	1	-0.266865	1	0.036185	1	-0.0665827	1	-0.319855	1	-0.0242132	-0.133693	1	1	FALSE
Bex3	-0.163262	0.00953447	-0.0723381	1	-0.0487914	1	-0.0831209	1	-0.174296	1.54434e-08	0.0695728	1	-0.0133903	1	-0.101372	1	0.0636045	1	0.111111	1	-0.108362	0.0259054	1.93754e-06	1	FALSE
Bfar	0.00176255	1	0.0235079	1	-0.00216003	1	0.0217734	1	-0.0376415	1	0.00159359	1	-0.0445353	1	-0.056495	1	-0.00619022	1	-0.13843	1	0.00144846	-0.0488114	1	1	FALSE
Bgn	-0.0297528	0.110156	-0.0519741	1	0.0119463	1	0.000851821	1	-0.0203625	1	-0.0998226	1	-0.05347	1	-0.0159454	1	0.0273009	1	-0.01127	1	-0.0178583	-0.0306414	0.926869	1	FALSE
Bhlhe40	0.160156	1	0.408905	0.329884	-0.000834634	1	-0.175976	1	0.204213	1	0.0265324	1	-0.0292999	1	0.188376	1	0.335375	1	-0.228761	1	0.119293	0.0584445	0.994379	1	FALSE
Bhlhe41	-0.0122713	1	0.0296385	1	0.080604	1	0.344754	1	-0.0511894	0.000101373	-0.0303832	1	-0.00887069	1	0.273992	1	-0.065172	1	0.0308733	1	0.0783072	0.0400878	0.0486791	1	FALSE
Bicd1	0.0296889	1	-0.013281	1	-0.0148143	1	-0.0374282	1	0.0157577	1	0.0232913	1	0.0064668	1	0.0712272	1	0.0415531	1	0.00626276	1	-0.00401536	0.0297602	1	1	FALSE
Bicd2	-0.0163824	1	0.0678762	1	-0.0362759	1	0.00256827	1	-0.0218815	1	-0.131821	1	-0.0625096	1	-0.0828751	1	0.127587	1	-0.0902302	1	-0.000819061	-0.0479698	1	1	FALSE
Bicra	-0.0165642	1	0.0107149	1	-0.0264342	1	0.0179032	1	-0.0130667	1	-0.0414381	1	-0.00415389	1	-0.000411436	1	0.0190763	1	0.067961	1	-0.00548939	0.00820676	1	1	FALSE
Bicral	0.063633	1	0.00917281	1	0.00687856	1	-0.0351396	1	0.0239122	1	0.0345445	1	0.000450751	1	-0.00234891	1	-0.0212781	1	0.00675994	1	0.0136914	0.00362563	1	1	FALSE
Bid	-0.0263187	1	-0.0506987	1	-0.0643227	1	-0.0480873	1	-0.0740654	1.73558e-08	-0.0482886	1	-0.00832251	1	-0.0136429	1	-0.0489539	1	-0.556752	1	-0.0526986	-0.135192	9.33373e-05	1	FALSE
Bin1	-0.200427	1	0.218781	1	-0.161182	1	0.220517	1	-0.0870248	1	0.0271496	1	0.0730041	1	0.227169	1	-0.170509	1	0.00312997	1	-0.00186707	0.0319887	1	1	FALSE
Bin3	-0.0145564	1	0.0584647	1	-0.0465421	1	0.101897	1	-0.0145911	1	-0.0175177	1	0.0626029	1	-0.067483	1	0.0201755	1	-0.102886	1	0.0169345	-0.0210217	1	1	FALSE
Birc2	-0.0825429	1	-0.0710033	1	-0.162194	1	-0.0690993	1	-0.0705709	0.120625	0.0182839	1	-0.091109	1	-0.00263608	1	0.0505411	1	-0.190925	1	-0.0910821	-0.043169	0.936368	1	FALSE
Birc3	-0.0598062	1	0.0724399	1	-0.162214	1	-0.0483399	1	-0.0417437	1	-0.0912203	1	-0.12388	1	-0.220505	1	-0.0517824	1	-0.0769212	1	-0.0479328	-0.112862	1	1	FALSE
Birc5	-0.197929	1	-0.0742566	1	0.0225613	1	0.124676	1	0.144578	1	0.0248345	1	0.0190177	1	-0.40588	1	0.228581	1	0.499248	1	0.00392611	0.0731602	1	1	FALSE
Birc6	0.0921934	1	-0.168845	1	-0.134895	1	-0.012771	1	-0.015966	1	0.0899206	1	0.00509628	1	-0.111172	1	0.319073	1	-0.00235617	1	-0.0480568	0.0601123	1	1	FALSE
Bivm	0.0172292	1	-0.0362322	1	-0.0334832	1	-0.0909414	1	-0.00308123	1	0.0176605	1	-0.0226875	1	0.0348758	1	0.0294508	1	0.0419787	1	-0.0293018	0.0202557	1	1	FALSE
Blcap	-0.149726	1.64243e-09	-0.14207	0.0432833	-0.0331871	1	-0.0607892	1	-0.150055	1.75881e-15	-0.0901191	1	-0.0745587	1	-0.0314159	1	-0.13973	1	-0.200443	0.985919	-0.107165	-0.107253	6.04646e-20	1	FALSE
Blm	-0.0261931	1	-0.0216503	1	-0.0893985	1	0.0493686	1	0.022028	1	0.0129652	1	0.0173784	1	-0.0380352	1	0.0220048	1	0.0364983	1	-0.0131691	0.0101623	1	1	FALSE
Blmh	-0.073946	1	-0.0807438	1	-0.0223777	1	0.00800494	1	-0.0463835	1	0.00573499	1	-0.132456	1	0.336598	1	0.191607	1	0.0191058	1	-0.0430892	0.0841178	1	1	FALSE
Bloc1s1	-0.00563383	1	-0.115182	0.895863	-0.100812	1	0.0397274	1	-0.0596066	1	-0.25216	0.000706833	-0.362031	0.0472038	-0.309734	1	-0.485879	1	-0.279962	1	-0.0483015	-0.337953	1	0.0239362	FALSE
Bloc1s2	-0.0889709	1	-0.0811552	1	0.0651145	1	0.0665457	1	-0.0494635	1	0.0124232	1	-0.0806346	1	-0.0113393	1	-0.116881	1	-0.0201111	1	-0.0175859	-0.0433086	1	1	FALSE
Bloc1s3	0.00765434	1	-0.0219621	1	-0.0103356	1	0.0364335	1	-0.00512886	1	-0.0163748	1	-0.0674252	1	0.0727632	1	-0.138958	1	0.0167464	1	0.00133225	-0.0266496	1	1	FALSE
Bloc1s4	0.0073649	1	0.00829325	1	-0.0377957	1	-0.112675	1	0.0380643	1	0.0678858	1	0.13252	1	-0.00229277	1	0.0945274	1	0.00168977	1	-0.0193497	0.058866	1	1	FALSE
Bloc1s5	0.0186519	1	-0.0247911	1	0.0561698	1	-0.00378077	1	-0.00258759	1	0.00146612	1	0.0140814	1	-0.225317	1	0.0326525	1	0.0364709	1	0.00873246	-0.0281292	1	1	FALSE
Bloc1s6	0.0331564	1	-0.0643541	1	0.00735755	1	-0.201696	1	-0.00264793	1	0.0362175	1	0.0698111	1	0.0146054	1	0.139201	1	0.0476572	1	-0.0456369	0.0614985	1	1	FALSE
Blvra	0.0624355	1	-0.060408	1	-0.0169569	1	-0.0655758	1	-0.00354993	1	0.078859	1	-0.0577716	1	0.0635612	1	0.0892409	1	0.0196069	1	-0.016811	0.0386993	1	1	FALSE
Blvrb	0.0909267	1	0.213158	1	0.122985	1	0.123201	1	0.0334928	1	0.203739	0.000863673	0.314346	0.0228912	0.0688621	1	0.0197751	1	0.026785	1	0.116753	0.126702	1	0.0169186	FALSE
Blzf1	0.0205839	1	-0.0229074	1	-0.113769	1	-0.012865	1	-0.00317496	1	-0.0364614	1	-0.00128707	1	0.00932411	1	-0.00846409	1	-0.0519535	1	-0.0264265	-0.0177684	1	1	FALSE
Bmi1	-0.0632017	1	-0.0792466	1	-0.0855994	1	-0.0711203	1	-0.0574131	1	0.0411568	1	-0.0596207	1	0.0274946	1	-0.0504182	1	0.112202	1	-0.0713162	0.014163	1	1	FALSE
Bmp1	-0.169537	0.123184	0.0629672	1	-0.222475	1	0.11907	1	-0.336755	1.26781e-22	-0.168378	1	-0.139779	1	0.0119911	1	-0.178243	1	-0.142253	1	-0.109346	-0.123332	5.34796e-18	1	FALSE
Bmp2k	0.0408347	1	-0.0128922	1	-0.0211936	1	-0.0482275	1	-0.00355737	1	-0.188305	1	-0.0165026	1	0.0439569	1	0.190893	1	-0.00279817	1	-0.00900718	0.00544883	1	1	FALSE
Bmp7	-0.0481355	0.00898215	0.0336141	1	0.0609871	1	0.00241118	1	-0.0558477	0.0238893	-0.0135781	1	0.129076	1	-0.0350207	1	-0.141332	1	-0.0971443	1	-0.00139415	-0.0316	0.0767499	1	FALSE
Bmpr1a	0.0197279	1	-0.00597535	1	-0.102266	1	-0.0727778	1	-0.0264092	1	-0.076323	1	0.00285296	1	-0.12897	1	-0.0760466	1	-0.107569	1	-0.03754	-0.0772111	1	1	FALSE
Bmpr2	0.0305851	1	0.096651	1	0.0319849	1	-0.161235	1	-0.0690479	1	0.0299495	1	-0.0250628	1	0.0265312	1	0.119274	1	0.031418	1	-0.0142125	0.0364219	1	1	FALSE
Bms1	-0.0270118	1	-0.0553529	1	-0.203268	1	0.0343404	1	0.0100637	1	-0.0523655	1	-0.1205	1	-0.319978	1	-0.00806484	1	0.0149043	1	-0.0482458	-0.0972007	1	1	FALSE
Bmt2	-0.0178585	1	-0.0498769	1	-0.0275772	1	0.0098028	1	-0.0267095	1	-0.0536126	1	-0.0211944	1	-0.244656	1	0.175309	1	-0.0833063	1	-0.0224439	-0.045492	1	1	FALSE
Bnc1	-0.0169805	1	-0.0536725	1	-0.0978516	1	0.1071	1	-0.0255719	1	-0.0114578	1	0.0420192	1	-0.0394326	1	0.0338589	1	-0.0651356	1	-0.0173952	-0.00802959	1	1	FALSE
Bnip1	-0.0509712	1	0.00903186	1	0.0910046	1	0.0592466	1	-0.0174602	1	-0.0551487	1	0.0343718	1	0.0803204	1	0.0101436	1	-0.0773604	1	0.0181703	-0.00153466	1	1	FALSE
Bnip2	-0.0367961	1	-0.0152842	1	-0.0263939	1	0.0154001	1	0.00798382	1	-0.176653	1	-0.046402	1	0.0147659	1	-0.122373	1	-0.12821	1	-0.0110181	-0.0917745	1	1	FALSE
Bnip3	0.286571	1	0.0819259	1	0.481455	1	0.0579841	1	0.20106	1	0.0835409	1	0.586317	1	0.545305	1	0.29557	1	0.153525	1	0.221799	0.332851	1	1	FALSE
Bnip3l	0.233882	0.798837	0.444029	0.0381957	0.457612	1	0.248845	1	0.210686	0.111671	0.271831	1	0.43735	1	0.461574	1	0.185132	1	0.0301152	1	0.319011	0.2772	0.329896	1	FALSE
Bod1	-0.13073	1	0.0321069	1	-0.0198563	1	-0.0926414	1	-0.0817008	0.064431	0.0252035	1	0.0407906	1	0.0245941	1	0.0902297	1	0.063346	1	-0.0585644	0.0488328	0.856571	1	FALSE
Bod1l	-0.0368402	1	-0.00699824	1	-0.261858	1	0.00695329	1	-0.0920822	1	0.0853803	1	0.121444	1	-0.112505	1	0.172434	1	0.0411731	1	-0.078165	0.0615855	1	1	FALSE
Bok	-0.0476333	1	-0.0265258	1	0.0870105	1	0.0863622	1	0.0576975	1	0.1859	1	0.201983	1	0.0805693	1	-0.0928286	1	0.0822109	1	0.0313822	0.0915669	1	1	FALSE
Bola1	-0.041323	1	0.0389375	1	0.0390382	1	0.142877	1	-0.021875	1	0.0927326	1	0.0628946	1	0.0656216	1	0.129746	1	0.0607452	1	0.031531	0.082348	1	1	FALSE
Bola2	0.0445249	1	-0.0993106	1	-0.0745271	1	0.04709	1	0.0705168	1	-0.104794	1	-0.124628	1	-0.189444	1	-0.183424	1	-0.0578836	1	-0.00234121	-0.132035	1	1	FALSE
Bola3	-0.0911069	1	-0.0478423	1	-0.0656546	1	-0.0176842	1	-0.0893825	0.512792	-0.00603267	1	-0.273531	1	-0.189671	1	-0.0414043	1	-0.283233	1	-0.0623341	-0.158775	0.999362	1	FALSE
Bop1	-0.002906	1	-0.0707997	1	0.0294917	1	-0.0237154	1	0.0241799	1	-0.0240418	1	-0.0677988	1	0.00685832	1	0.0180401	1	-0.179	1	-0.00874989	-0.0491885	1	1	FALSE
Bora	-0.0145298	1	-0.0352933	1	-0.0476865	1	-0.0261804	1	-0.00239414	1	-0.00379059	1	-0.0463028	1	-0.00914861	1	0.0807836	1	0.0141587	1	-0.0252168	0.00714006	1	1	FALSE
Borcs5	0.00569602	1	0.00904449	1	0.00737415	1	0.0777876	1	-0.00638957	1	-0.00190198	1	0.00566941	1	0.0251418	1	0.0109629	1	-0.0152831	1	0.0187025	0.00491781	1	1	FALSE
Borcs6	0.0325781	1	-0.0299084	1	0.063858	1	0.0498552	1	0.0186452	1	0.0235216	1	0.0154434	1	0.0210409	1	-0.141438	1	0.0646204	1	0.0270056	-0.0033623	1	1	FALSE
Borcs7	-0.036199	1	-0.0377045	1	0.00407853	1	0.0562188	1	-0.0315959	0.676378	0.0858614	1	0.0660659	1	0.100521	1	0.0182496	1	0.151052	1	-0.00904042	0.0843499	0.999945	1	FALSE
Borcs8	-0.0649383	1	0.102084	1	-0.00207164	1	0.0185981	1	-0.052663	1	-0.0515824	1	-0.031803	1	0.165785	1	0.0835107	1	0.0509574	1	0.000201768	0.0433736	1	1	FALSE
Bpgm	0.003917	1	-0.00334415	1	-0.0387537	1	-0.0841701	1	-0.00407664	1	-0.0193111	1	-0.141367	1	-0.0208179	1	0.00681432	1	-0.0107088	1	-0.0252855	-0.0370781	1	1	FALSE
Bphl	-0.037084	1	0.156887	1	0.0349394	1	0.0648527	1	-0.0443051	1	0.0345959	1	0.0289506	1	0.146392	1	-0.0163228	1	0.135127	1	0.035058	0.0657486	1	1	FALSE
Bpnt1	0.0276717	1	-0.0661319	1	0.0153459	1	-0.00242176	1	0.0228439	1	-0.0231277	1	-0.0869984	1	-0.0140616	1	-0.105031	1	-0.112564	1	-0.000538416	-0.0683566	1	1	FALSE
Bptf	-0.0103828	1	-0.137606	1	-0.222713	1	0.0278523	1	-0.0498559	1	-0.0134288	1	-0.0982299	1	-0.213646	1	0.11905	1	-0.0370681	1	-0.0785411	-0.0486644	1	1	FALSE
Braf	0.0253149	1	-0.0576944	1	-0.0955415	1	-0.0453039	1	-0.00700177	1	-0.0218185	1	-0.0574812	1	-0.132574	1	-0.0201386	1	-0.0309511	1	-0.0360453	-0.0525927	1	1	FALSE
Brap	-0.0141955	1	-0.0327121	1	-0.128698	1	0.0421106	1	0.0381082	1	0.0369462	1	0.008366	1	-0.0790126	1	0.0332414	1	-0.0363614	1	-0.0190774	-0.00736407	1	1	FALSE
Brat1	0.0132554	1	-0.00176939	1	0.00662583	1	0.0247979	1	0.00442774	1	0.0187722	1	-0.00594666	1	-0.012137	1	0.0070637	1	-0.0336713	1	0.00946748	-0.0051838	1	1	FALSE
Brca1	0.0240572	1	-0.0279902	1	-0.0193426	1	0.0315978	1	0.0167817	1	0.0406598	1	-0.0027656	1	0.0361355	1	-0.0148644	1	0.060415	1	0.00502077	0.023916	1	1	FALSE
Brca2	-0.0390391	1	0.0153319	1	-0.0774741	1	0.0361386	1	-0.0214845	1	0.0172758	1	0.015344	1	0.0508168	1	0.00134049	1	0.000426789	1	-0.0173055	0.0170408	1	1	FALSE
Brcc3	-0.0258866	0.700542	-0.120099	0.921898	-0.0786154	1	0.0672419	1	-0.0860632	0.000369895	-0.0906667	1	0.0439082	1	0.0310482	1	-0.0297661	1	-0.0504493	1	-0.0486845	-0.0191851	0.0817749	1	FALSE
Brd1	-0.0365702	1	-0.0648983	1	-0.0257542	1	-0.190805	1	-0.0127116	1	0.0311997	1	0.0192878	1	-0.198579	1	0.00135907	1	-0.181222	1	-0.0661478	-0.065591	1	1	FALSE
Brd2	0.185562	1	-0.0887591	1	-0.0207478	1	-0.070225	1	0.171882	0.246336	-0.156244	1	-0.11689	1	-0.397951	1	0.0316367	1	-0.152816	1	0.0355424	-0.158453	0.985705	1	FALSE
Brd3	-0.0357258	1	-0.076177	1	-0.0408085	1	-0.00364359	1	-0.0804407	0.0170304	-0.0841449	1	-0.0781726	1	-0.329916	1	-0.0908391	1	-0.155279	1	-0.0473591	-0.14767	0.614626	1	FALSE
Brd4	0.0458355	1	-0.0274804	1	0.0123094	1	-0.00619403	1	0.00724634	1	0.000554371	1	0.0212728	1	-0.326171	1	0.0974397	1	-0.132208	1	0.00634338	-0.0678225	1	1	FALSE
Brd7	-0.0273254	1	-0.15898	1	-0.076403	1	0.0426468	1	-0.0175456	1	-0.106251	1	-0.0995027	1	-0.10838	1	0.0182064	1	-0.248886	1	-0.0475214	-0.108963	1	1	FALSE
Brd8	-0.00616777	1	-0.113139	1	-0.102923	1	-0.191851	1	-0.0677508	1	0.0110274	1	-0.172409	1	0.172996	1	0.0403678	1	-0.117534	1	-0.0963663	-0.0131105	1	1	FALSE
Brd9	0.0233081	1	-0.0446438	1	0.117386	1	-0.0910055	1	0.00758592	1	0.0569113	1	-0.0150767	1	-0.110488	1	-0.0234149	1	0.0354831	1	0.00252604	-0.011317	1	1	FALSE
Brf1	-0.0353097	1	0.0245441	1	-0.0428489	1	0.0477871	1	-0.0285188	1	0.0202592	1	-0.00519552	1	-0.00859315	1	-0.0422694	1	-0.102602	1	-0.00686924	-0.0276802	1	1	FALSE
Brf2	0.00315906	1	-0.00284119	1	-0.0411594	1	-0.0298628	1	0.00354901	1	0.00801317	1	-0.000319045	1	0.0467282	1	-0.0108956	1	0.0552825	1	-0.0134311	0.0197618	1	1	FALSE
Bri3	-0.112522	1	0.0296047	1	-0.0295357	1	-0.188559	1	-0.143797	0.0153436	-0.0578167	1	0.264801	0.0187086	-0.0490457	1	-0.183529	1	0.206198	1	-0.0889617	0.0361216	0.59429	0.632984	FALSE
Bri3bp	-0.0420462	1	-0.129249	1	-0.115448	1	-0.142737	1	-0.0236448	1	0.108598	1	0.0605556	1	-0.0515336	1	0.0160307	1	-0.0338302	1	-0.090625	0.0199641	1	1	FALSE
Brip1	0.0104761	1	-0.0187023	1	-0.0643563	1	0.0873534	1	0.0170689	1	0.00982013	1	0.0437463	1	0.0263973	1	-0.00668566	1	0.174412	1	0.00636797	0.049538	1	1	FALSE
Brip1os	-0.0463018	1	-0.115366	0.0973183	0.0757868	1	-0.0150621	1	-0.0592735	0.344961	-0.0454996	1	-0.079069	1	0.0115115	1	0.0749166	1	0.0525116	1	-0.0320433	0.00287421	0.745279	1	FALSE
Brix1	-0.170775	0.0022953	-0.081563	1	-0.0571707	1	-0.048031	1	-0.117781	0.818624	-0.127474	1	-0.162655	1	-0.0856536	1	-0.183801	1	-0.0616569	1	-0.095064	-0.124248	0.249685	1	FALSE
Brk1	0.0518817	1	0.0479016	1	0.067445	1	-0.0475963	1	0.0770884	1	0.0880996	1	-0.104295	1	0.0628701	1	0.327905	1	-0.114727	1	0.0393441	0.0519705	1	1	FALSE
Brms1	-0.024781	1	-0.0205961	1	0.117344	1	-0.0468345	1	0.00626836	1	-0.0440914	1	0.027784	1	0.0237659	1	-0.0316221	1	0.078054	1	0.00628023	0.0107781	1	1	FALSE
Brms1l	-0.0391603	1	-0.000945326	1	-0.0430264	1	-0.0695267	1	0.0272275	1	0.0220266	1	0.00491457	1	-0.0311811	1	0.00158581	1	-0.0174427	1	-0.0250862	-0.00401936	1	1	FALSE
Brox	0.0288648	1	-0.0167393	1	-0.155535	1	0.0910071	1	-0.0214912	1	-0.0795219	1	0.0118578	1	0.0091558	1	-0.138489	1	-0.0682885	1	-0.0147787	-0.0530572	1	1	FALSE
Brpf1	-0.00510863	1	-0.100789	1	-0.136378	1	-0.112812	1	-0.0251541	1	0.0134672	1	0.0161105	1	-0.0523957	1	0.00608898	1	-0.0086272	1	-0.0760484	-0.00507124	1	1	FALSE
Brpf3	-0.0175482	1	-0.026165	1	-0.0538125	1	0.0752891	1	-0.0189149	1	0.0201515	1	0.0199028	1	0.0126481	1	0.0583801	1	0.00879469	1	-0.0082303	0.0239754	1	1	FALSE
Brsk1	-0.0240558	1	-0.0319712	1	-0.0820508	1	-0.0746366	1	-0.0550685	3.04566e-06	-0.0592878	1	-0.0023975	1	-0.0172364	1	-0.0694511	1	-0.135862	1	-0.0535566	-0.0568469	0.0046308	1	FALSE
Brwd1	-0.00837048	1	-0.0636798	1	-0.137761	1	-0.11076	1	-0.0341254	1	-0.0883256	1	-0.272272	1	-0.110207	1	-0.0428959	1	-0.0872858	1	-0.0709393	-0.120197	1	1	FALSE
Brwd3	0.0158357	1	-0.00598143	1	-0.0523922	1	-0.0353988	1	-0.00462416	1	0.00429215	1	-0.0590251	1	-0.0406601	1	0.060877	1	0.00917798	1	-0.0165122	-0.00506761	1	1	FALSE
Bscl2	-0.0558427	0.209188	-0.0477532	1	-0.00873524	1	-0.0549543	1	-0.0143974	1	-0.0098181	1	-0.0366054	1	0.0167654	1	-0.00253133	1	0.0382418	1	-0.0363366	0.00121048	0.978222	1	FALSE
Bsdc1	0.00177263	1	-0.0222041	1	-0.0126654	1	-0.0586461	1	-0.0106909	1	-0.0568297	1	-0.0450737	1	-0.203708	1	-0.0754346	1	0.0244083	1	-0.0204868	-0.0713275	1	1	FALSE
Bsg	0.0549059	1	0.254292	1	0.346428	1	0.354795	1	0.0292498	1	0.152249	1	0.468275	1	0.345738	1	0.319037	1	0.207602	1	0.207934	0.29858	1	1	FALSE
Bst2	-1.10927	6.23238e-35	-0.828594	5.81805e-13	-0.958983	0.0122939	-1.06344	0.0614691	-1.04826	5.23452e-58	-0.834128	3.38864e-12	-0.487841	0.0835405	-1.07805	0.101085	-0.0831769	1	-0.704388	1	-1.00171	-0.637517	2.22529e-99	1.28711e-09	TRUE
Btaf1	0.0682	1	0.0211292	1	-0.0563327	1	-0.0289524	1	0.023902	1	-0.0018902	1	-0.0143263	1	-0.0836299	1	-0.102242	1	0.0364469	1	0.00558924	-0.0331282	1	1	FALSE
Btbd1	0.0198614	1	0.0320902	1	0.0673432	1	0.0284913	1	0.0445842	1	0.0500577	1	0.0615086	1	-0.257391	1	0.155343	1	-0.0469352	1	0.0384741	-0.00748342	1	1	FALSE
Btbd10	-0.0398804	1	-0.0780882	1	0.0548694	1	-0.0191334	1	-0.0320906	1	-0.0130158	1	-0.0359251	1	-0.00997259	1	-0.075802	1	-0.0190938	1	-0.0228647	-0.0307619	1	1	FALSE
Btbd19	0.00425202	1	-0.0330629	1	-0.0127694	1	0.0336583	1	0.0067161	1	-0.00360096	1	-0.0428137	1	-0.00729892	1	-0.00295336	1	0.00691269	1	-0.000241164	-0.00995084	1	1	FALSE
Btbd2	0.0556644	1	0.127623	1	0.0679825	1	0.141033	1	-0.00299335	1	0.103515	1	0.105344	1	-0.0220865	1	0.18261	1	0.0262924	1	0.0778619	0.0791351	1	1	FALSE
Btbd3	0.0847883	1	-0.0195888	1	0.0644859	1	-0.0356749	1	0.153468	2.81027e-07	0.0149854	1	-0.0286225	1	-0.203699	1	-0.0130695	1	-0.017486	1	0.0494958	-0.0495783	0.000803582	1	FALSE
Btbd6	-0.0163181	1	-0.0107101	1	-0.0290791	1	-0.0433904	1	0.00601328	1	-0.194245	1	0.00670381	1	-0.021497	1	0.032774	1	-0.131224	1	-0.0186969	-0.0614976	1	1	FALSE
Btbd7	-0.0335471	1	-0.136359	1	-0.171478	1	-0.274785	1	-0.0460372	1	0.0234987	1	0.166206	1	-0.0520314	1	-0.038594	1	0.0213368	1	-0.132441	0.0240832	1	1	FALSE
Btbd9	0.0370018	1	-0.073971	1	-0.138444	1	0.0659003	1	-0.0138118	1	0.0538748	1	0.0679026	1	-0.0731295	1	0.090126	1	0.0297152	1	-0.024665	0.0336978	1	1	FALSE
Btd	-0.0401935	1	0.0173783	1	-0.0628901	1	-0.0565197	1	0.0230044	1	-0.00645499	1	0.0324573	1	-0.00804038	1	0.0416811	1	-0.0152791	1	-0.0238441	0.0088728	1	1	FALSE
Btf3	-0.212209	1.023e-08	-0.0768132	1	-0.128318	1	-0.321863	1	-0.0876087	0.0224402	-0.0497587	1	0.116647	1	0.0768034	1	0.023587	1	0.142076	1	-0.165362	0.061871	2.80131e-06	1	FALSE
Btf3l4	-0.0225324	1	-0.0908568	0.155581	-0.143518	1	-0.0182118	1	-0.049901	1	-0.0513623	1	-0.0673099	1	-0.0736695	1	-0.255238	1	-0.0884842	1	-0.0650041	-0.107213	0.95905	1	FALSE
Btg1	0.314308	0.103383	0.264075	1	0.0935449	1	-0.0463122	1	0.286392	9.6561e-05	-0.227387	1	-0.38009	1	-0.42933	1	-0.498502	1	-0.192218	1	0.182401	-0.345505	0.010639	1	FALSE
Btg2	0.0844261	1	0.61965	1	0.272947	1	0.417255	1	0.107485	1	0.0212105	1	0.084742	1	0.178365	1	0.326882	1	-0.0236402	1	0.300353	0.117512	1	1	FALSE
Btg3	-0.1061	0.00723131	-0.228223	0.000505695	-0.0569294	1	-0.118683	1	-0.184781	3.40715e-19	-0.274725	0.00212423	-0.280537	1	-0.476755	0.751163	-0.447958	1	-0.285711	1	-0.138943	-0.353137	5.1309e-19	0.230404	FALSE
Btrc	-0.0398681	1	0.0519458	1	-0.108225	1	0.00676491	1	-0.0522975	1	-0.00615322	1	-0.12166	1	0.0163972	1	-0.0221771	1	0.0263537	1	-0.0283361	-0.0214478	1	1	FALSE
Bub1	-0.0445015	1	-0.0888082	1	0.0478485	1	-0.0447852	1	0.00551913	1	0.0672831	1	0.0237149	1	-0.0203259	1	0.00302621	1	0.158468	1	-0.0249455	0.0464333	1	1	FALSE
Bub1b	-0.0264226	1	-0.0158763	1	-0.0577264	1	-0.0714956	1	0.0227914	1	0.016147	1	0.00124162	1	-0.0116592	1	0.0292399	1	-0.0480765	1	-0.0297459	-0.00262143	1	1	FALSE
Bub3	-0.144104	1	-0.0388075	1	0.0914106	1	-0.10444	1	0.0172117	1	-0.0340341	1	-0.0745506	1	-0.213976	1	-0.208261	1	0.261794	1	-0.0357457	-0.0538055	1	1	FALSE
Bud13	-0.0112926	1	0.0251884	1	-0.0670877	1	0.0711099	1	0.0119332	1	-0.00325432	1	-0.00482535	1	-0.0272359	1	-0.0268562	1	-0.0237724	1	0.00597024	-0.0171888	1	1	FALSE
Bud23	-0.0811599	1	-0.0167107	1	-0.0885319	1	-0.090107	1	0.0156869	1	0.0346481	1	0.0266093	1	-0.0394508	1	0.00594672	1	-0.0451302	1	-0.0521645	-0.00347538	1	1	FALSE
Bud31	-0.112485	1	-0.102754	1	0.00136868	1	-0.226264	1	-0.0283856	1	0.0141504	1	-0.152869	1	-0.228469	1	-0.118722	1	0.0517216	1	-0.093704	-0.0868377	1	1	FALSE
Bvht	0.0220826	1	-0.0114868	1	0.0467883	1	0.151073	1	0.0196215	1	0.0532525	1	0.0661754	1	0.123072	1	-0.0213344	1	0.0701573	1	0.0456158	0.0582646	1	1	FALSE
Bysl	-0.0393844	1	-0.0561961	1	-0.0401071	1	0.00704875	1	-0.00574013	1	0.00347124	1	-0.0165191	1	-0.117301	1	-0.0754414	1	-0.00211951	1	-0.0268758	-0.041582	1	1	FALSE
Bzw1	-0.163692	0.0381535	-0.167955	1	-0.0830509	1	-0.193935	1	-0.202663	3.38042e-08	-0.0644946	1	0.0191453	1	-0.0025949	1	-0.0244089	1	0.0400367	1	-0.162259	-0.00646329	1.15747e-05	1	FALSE
Bzw2	-0.219495	0.00298244	-0.0713619	1	-0.131082	1	0.0247129	1	-0.182433	1.57729e-06	-0.0896855	1	-0.000459669	1	-0.202954	1	-0.0344196	1	-0.104145	1	-0.115932	-0.0863327	3.29842e-05	1	FALSE
C130071C03Rik	-0.017356	1	-0.0339035	1	0.0505816	1	-0.00111296	1	-0.0240236	1	-0.00661072	1	0.0143106	1	0.00267731	1	0.0109602	1	-0.0307407	1	-0.00516289	-0.00188064	1	1	FALSE
C1d	-0.176098	7.31127e-05	-0.0173685	1	-0.0113422	1	0.0381506	1	-0.130263	4.36702e-07	0.0121862	1	0.124268	1	-0.0764298	1	0.106539	1	0.036948	1	-0.0593842	0.0407023	5.39075e-07	1	FALSE
C1galt1	0.00052139	1	-0.0227319	1	0.00769339	1	0.131559	1	0.0117188	1	0.0162843	1	-0.0237494	1	-0.00296349	1	0.0380691	1	0.124912	1	0.0257522	0.0305105	1	1	FALSE
C1galt1c1	0.0662885	1	0.0350562	1	-0.00523231	1	-0.0221489	1	-0.000653954	1	0.0580144	1	0.121346	1	0.0138021	1	-0.0329431	1	-0.171605	1	0.0146619	-0.00227704	1	1	FALSE
C1qbp	-0.143104	1	-0.131494	1	-0.10207	1	-0.101846	1	0.0847676	1	-0.129349	1	-0.0997556	1	-0.169973	1	-0.0712525	1	-0.0534715	1	-0.0787492	-0.10476	1	1	FALSE
C1qtnf1	-0.123552	5.95034e-09	-0.00455919	1	0.0316304	1	-0.0361924	1	-0.0975436	8.44827e-10	-0.199044	1	-0.0542342	1	-0.047606	1	0.107566	1	-0.105168	1	-0.0460434	-0.0596973	5.84387e-13	1	FALSE
C1qtnf6	-0.0254196	0.0722349	-0.0200198	1	0.0458954	1	-0.014738	1	-0.0376841	2.67919e-06	0.00763142	1	-0.0209199	1	0.00908594	1	-0.0175607	1	-0.0341817	1	-0.0103932	-0.011189	0.000605842	1	FALSE
C2cd3	-0.00628122	1	0.0172573	1	0.0610823	1	-0.00760459	1	-0.0143701	1	-0.0430326	1	0.0218908	1	-0.0450486	1	0.0205379	1	0.0524223	1	0.0100167	0.00135396	1	1	FALSE
C2cd5	0.0130861	1	-0.0166787	1	-0.000905958	1	0.0655978	1	-0.0213574	1	0.034263	1	-0.00740107	1	-0.0200078	1	0.0485297	1	-0.0218635	1	0.00794837	0.00670406	1	1	FALSE
C3	0.610503	1	0.946007	1	0.0697286	1	0.119597	1	0.573162	1	-0.0316615	1	0.112192	1	-0.273294	1	-0.0844797	1	0.280235	1	0.4638	0.00059816	1	1	FALSE
C330007P06Rik	-0.0307346	1	-0.0358276	1	-0.12013	1	-0.0140709	1	-0.0309555	1	0.0137377	1	0.0191979	1	-0.0157445	1	-0.0156092	1	-0.0318227	1	-0.0463437	-0.00604815	1	1	FALSE
C330027C09Rik	-0.00692568	1	-0.0795634	1	0.0438971	1	-0.0274624	1	0.0109904	1	-0.00579834	1	-0.038923	1	-0.00154816	1	0.0486496	1	0.0803076	1	-0.0118128	0.0165375	1	1	FALSE
C730034F03Rik	-0.0109596	1	0.0221404	1	0.00929638	1	-0.253732	1	-0.0376195	1	-0.014948	1	-0.0204401	1	-1.17358e-05	1	0.089356	1	0.00760277	1	-0.0541748	0.0123118	1	1	FALSE
C77080	0.290146	8.10421e-07	0.149195	1	0.0321276	1	0.177446	1	0.197864	2.18828e-10	0.0562327	1	-0.108615	1	-0.0951318	1	0.0946637	1	0.0145652	1	0.169356	-0.00765697	1.43188e-11	1	FALSE
C87436	0.0281889	1	-0.00848405	1	0.0544937	1	0.0912036	1	0.00103886	1	0.0149506	1	0.0183493	1	-0.0249977	1	0.0120295	1	0.0103968	1	0.0332882	0.00614573	1	1	FALSE
CAAA01118383.1	0.0259385	1	0.0134712	1	-0.0321987	1	-0.0819712	1	0.0753438	1	0.0547622	1	0.0746109	1	-0.00371613	1	0.0481623	1	0.137831	1	0.000116732	0.0623301	1	1	FALSE
CAAA01147332.1	-0.0101589	1	-0.0137138	1	0.00492799	1	-0.0276223	1	-0.0185194	1	-0.0491335	1	-0.0505134	1	-0.089375	1	-0.0985495	1	-0.037405	1	-0.0130173	-0.0649953	1	1	FALSE
Caap1	0.00503126	1	-0.048137	1	-0.0774951	1	-0.110756	1	-0.0529316	1	-0.0168246	1	-0.032135	1	0.005032	1	0.0612481	1	-0.0291875	1	-0.0568576	-0.00237341	1	1	FALSE
Cab39	-0.00428377	1	-0.0248519	1	0.0563437	1	-0.050093	1	-0.00570685	1	-0.174676	1	0.0190624	1	-0.113792	1	-0.1614	1	0.0106706	1	-0.00571837	-0.0840269	1	1	FALSE
Cab39l	-0.0103531	1	0.0449961	1	0.0337024	1	0.0873535	1	0.00983727	1	0.0110786	1	-0.279117	1	-0.14083	1	0.101417	1	-0.0263192	1	0.0331072	-0.0667541	1	1	FALSE
Cabin1	0.00459118	1	-0.117639	1	-0.209033	1	-0.026167	1	0.0419436	1	0.0479622	1	0.0574495	1	-0.0706624	1	0.0598923	1	-0.0471674	1	-0.0612607	0.00949484	1	1	FALSE
Cables2	-0.0203622	1	0.00899775	1	0.0211681	1	-0.00993313	1	0.0129055	1	0.0134396	1	-0.0337645	1	-0.0761496	1	0.0100705	1	0.00697757	1	0.00255521	-0.0158853	1	1	FALSE
Cacfd1	0.0490433	1	0.00624642	1	0.0964698	1	-0.00997337	1	-0.0190133	1	0.0174776	1	0.00679419	1	0.414031	1	-0.10386	1	-0.0402474	1	0.0245546	0.0588392	1	1	FALSE
Cacna1a	-0.00866436	1	-0.0543443	1	0.101469	1	0.0134655	1	0.000103709	1	0.0378201	1	-0.00477414	1	-0.0387493	1	0.0439361	1	-0.260927	1	0.0104059	-0.0445389	1	1	FALSE
Cacnb3	-0.106935	1.3707e-07	-0.0676614	1	-0.125283	1	-0.0841519	1	-0.187039	2.10538e-43	-0.147358	4.86486e-06	-0.0418122	1	-0.106994	1	0.0828224	1	-0.138601	0.276503	-0.114214	-0.0703886	2.10912e-43	0.00256851	FALSE
Cactin	0.0093646	1	-0.0353138	1	-0.0130811	1	-0.163112	1	0.0219279	1	-0.15358	1	0.0376316	1	-0.0287865	1	-0.00231537	1	-0.00378761	1	-0.0360428	-0.0301675	1	1	FALSE
Cacul1	-0.0279033	1	-0.0702588	1	0.0504022	1	-0.120556	1	-0.00407789	1	-0.101047	1	0.022094	1	-0.122668	1	0.036522	1	-0.0117033	1	-0.0344788	-0.0353604	1	1	FALSE
Cacybp	-0.180166	0.116066	-0.29692	1	-0.163888	1	-0.165863	1	-0.182712	0.00684873	-0.146849	1	-0.100491	1	-0.193706	1	-0.0105026	1	0.10819	1	-0.19791	-0.0686717	0.160832	1	FALSE
Cad	0.0609723	1	-0.126728	0.139148	-0.103908	1	-0.0341915	1	0.0270442	1	-0.0316607	1	0.00122681	1	-0.0239838	1	-0.11321	1	-0.0330989	1	-0.0353622	-0.0401454	0.949819	1	FALSE
Cadm4	-0.00815075	1	-0.0151414	1	0.0342084	1	0.0159099	1	-0.00431194	1	-0.023885	1	-0.037854	1	-0.0151722	1	-0.101272	1	-0.00284631	1	0.00450283	-0.0362059	1	1	FALSE
Calcoco1	-0.00910145	1	0.0128059	1	-0.0808092	1	0.0523157	1	-0.0424367	1	0.0228517	1	-0.0586194	1	-0.0633114	1	0.050607	1	-0.0160551	1	-0.0134452	-0.0129055	1	1	FALSE
Cald1	-0.453932	9.51098e-12	-0.198228	1	-0.212819	1	-0.543678	1	-0.724375	7.39275e-50	-0.222135	1	-0.305059	1	-0.265008	1	0.060166	1	-0.126109	1	-0.426606	-0.171629	1.11005e-53	1	FALSE
Calm1	-0.147454	1	0.131727	1	0.195585	1	-0.0332322	1	-0.0735619	1	0.087522	1	0.278313	0.381887	0.0624134	1	0.100814	1	0.220544	1	0.014613	0.149921	1	0.996882	FALSE
Calm2	0.0241656	1	0.180239	1	0.173284	1	0.127057	1	-0.0829285	1	-0.154227	1	-0.162173	1	-0.240716	1	-0.150043	1	-0.144912	1	0.0843635	-0.170414	1	1	FALSE
Calm3	-0.0946955	0.588725	-0.106687	1	0.0399435	1	-0.00041298	1	-0.112744	0.000359682	-0.0675491	1	0.0165765	1	-0.0603237	1	-0.269051	1	0.108026	1	-0.0549192	-0.0544643	0.0761491	1	FALSE
Calr	-0.0985896	1	-0.124458	1	-0.218043	1	-0.204935	1	0.0249444	1	-0.221892	1	-0.23685	1	-0.38732	1	-0.310261	1	-0.0858557	1	-0.124216	-0.248436	1	1	FALSE
Calu	-0.170383	0.0335613	-0.380848	0.000452593	-0.48898	1	-0.226495	1	-0.264333	2.47908e-15	-0.116014	1	-0.316353	1	0.0326824	1	-0.14823	1	-0.108558	1	-0.306208	-0.131294	6.87943e-15	1	FALSE
Camk1	0.0564292	1	0.137441	1	-0.100312	1	-0.184303	1	-0.0475836	1	-0.0182225	0.178402	0.0364439	1	0.0475086	1	-0.129435	1	0.0799264	1	-0.0276657	0.00324426	1	0.968853	FALSE
Camk2d	0.214816	0.448935	0.302288	1	-0.100074	1	0.0840516	1	0.290483	1.10808e-11	0.0154413	1	0.102157	1	-0.0801859	1	-0.0323956	1	-0.0704689	1	0.158313	-0.0130905	1.11545e-07	1	FALSE
Camk2g	0.0595769	1	0.127478	1	0.0147398	1	0.0904879	1	0.200485	6.90271e-08	0.086986	1	0.0553235	1	-0.0387692	1	0.0894948	1	-0.173154	1	0.0985535	0.00397626	0.000274764	1	FALSE
Camk2n1	-0.152445	5.62135e-07	-0.000134879	1	-0.101071	1	0.109389	1	-0.166222	4.37118e-24	-0.0804463	1	-0.0333257	1	-0.22137	1	-0.00888337	1	0.0232525	1	-0.0620969	-0.0641546	2.34784e-24	1	FALSE
Camk2n2	-0.0474592	1	0.0605163	1	0.0389248	1	0.0805438	1	-0.0269515	1	0.0373134	1	0.0372085	1	-0.114637	1	-0.126633	1	-0.0807176	1	0.0211148	-0.049493	1	1	FALSE
Camkk2	0.0273587	1	0.00239073	1	-0.132736	1	-0.0101674	1	-0.0455095	1	-0.00937159	1	-0.00335685	1	0.0405312	1	0.0534071	1	-0.0437521	1	-0.0317327	0.00749155	1	1	FALSE
Caml	-0.0136413	1	-0.0504981	1	-0.000298855	1	0.0268408	1	-0.0523031	1	-0.112398	1	-0.227566	1	-0.102056	1	-0.0114335	1	-0.1211	1	-0.0179801	-0.114911	1	1	FALSE
Camsap1	0.0218535	1	-0.0274097	1	0.0280677	1	-0.05744	1	0.00585587	1	0.0694645	1	-0.0356532	1	-0.0117397	1	0.0420291	1	0.0837305	1	-0.00581452	0.0295662	1	1	FALSE
Camsap2	0.0188321	1	0.0187378	1	-0.137873	1	-0.0130679	1	-0.0150201	1	-0.0483287	1	-0.0252266	1	-0.0226367	1	0.147475	1	0.0727154	1	-0.0256782	0.0247996	1	1	FALSE
Camta1	-0.0346834	1	-0.0632628	1	-0.0396964	1	-0.16564	1	-0.0657977	0.0192694	-0.131491	1	0.0458447	1	-0.0739378	1	-0.00986128	1	0.0598379	1	-0.0738161	-0.0219214	0.638753	1	FALSE
Camta2	0.0246641	1	0.0235718	1	0.00711725	1	-0.0128071	1	0.00610451	1	0.0412858	1	0.00591263	1	-0.0409077	1	-0.0320823	1	0.0245202	1	0.0097301	-0.000254272	1	1	FALSE
Cand1	-0.085579	1	-0.000660416	1	-0.146567	1	-0.082221	1	-0.0514839	1	-0.0471818	1	0.00875121	1	0.316503	1	0.084988	1	-0.38109	1	-0.0733022	-0.00360602	1	1	FALSE
Cand2	-0.011347	1	-2.3162e-05	1	0.0583486	1	-0.0207018	1	-0.0236948	0.749627	0.0162214	1	-0.0339493	1	0.00117343	1	0.0265779	1	-0.0335251	1	0.000516372	-0.00470035	0.999987	1	FALSE
Cant1	0.0412631	1	0.0283142	1	-0.0278174	1	-0.0113679	1	0.0244832	1	-0.00261821	1	0.0681671	1	0.0178544	1	-0.0343145	1	-0.00950939	1	0.010975	0.00791589	1	1	FALSE
Canx	0.159179	1	-0.133608	1	-0.0234718	1	-0.0902663	1	0.0690378	1	0.0133095	1	-0.0526874	1	-0.463528	1	0.0976995	1	0.157826	1	-0.00382589	-0.0494762	1	1	FALSE
Cap1	0.016053	1	-0.0683129	1	0.187227	1	0.0216268	1	0.0528115	1	-0.0859396	1	0.0173816	1	0.0176704	1	-0.406959	1	0.0490793	1	0.0418811	-0.0817535	1	1	FALSE
Capg	-0.235568	0.00821718	0.0722319	1	0.0221693	1	-0.0572653	1	-0.00875352	1	-0.000545195	1	-0.0038134	1	-0.0880044	1	-0.19376	1	0.136953	1	-0.0414371	-0.0298341	0.475981	1	FALSE
Capn1	-0.0120867	1	0.008847	1	-0.0643948	1	-0.018343	1	0.00123947	1	-0.00375298	1	-0.241996	1	0.0420934	1	0.137421	1	-0.140145	1	-0.0169476	-0.0412759	1	1	FALSE
Capn10	-0.049605	1	0.0508963	1	0.0117682	1	-0.127923	1	-0.0239962	1	-0.000657373	1	-0.0296865	1	-0.00783236	1	-0.094433	1	0.0354337	1	-0.0277719	-0.0194351	1	1	FALSE
Capn15	-0.00266045	1	0.0192166	1	0.00809815	1	0.00558106	1	-0.0236883	1	-0.00255225	1	0.0364847	1	0.0174045	1	0.0932816	1	0.0190387	1	0.00130941	0.0327314	1	1	FALSE
Capn2	-0.0200376	1	0.146629	1	0.233107	1	0.074565	1	-0.000970817	1	-0.0801869	1	0.0755839	1	-0.218429	1	0.0816104	1	-0.104505	1	0.0866585	-0.0491854	1	1	FALSE
Capn7	0.0229443	1	-0.00963388	1	-0.0647773	1	0.291455	1	0.0260219	1	0.00377395	1	-0.0186276	1	-0.0483581	1	-0.0633619	1	0.0192314	1	0.0532019	-0.0214684	1	1	FALSE
Capns1	0.011222	1	0.186471	1	0.240806	1	0.416621	1	-0.000692049	1	0.0773406	1	0.115239	1	-0.192003	1	-0.206045	1	0.152243	1	0.170886	-0.0106453	1	1	FALSE
Caprin1	-0.227804	7.43772e-05	-0.358436	2.43628e-05	-0.341807	1	-0.118309	1	-0.283205	9.5233e-19	-0.259488	1	-0.238708	1	-0.187095	1	0.0876922	1	-0.269406	1	-0.265912	-0.173401	1.10762e-21	1	FALSE
Caprin2	0.00498356	1	0.000804076	1	-0.0337231	1	-0.000312327	1	-0.00121099	1	0.00313509	1	-0.00590488	1	0.0177857	1	0.0471515	1	0.0123291	1	-0.00589175	0.0148993	1	1	FALSE
Capza1	-0.0086683	1	0.0752657	1	-0.0428212	1	0.0330136	1	0.0507353	1	-0.00272337	1	0.0715998	1	-0.161737	1	0.0823178	1	-0.189989	1	0.021505	-0.0401063	1	1	FALSE
Capza2	0.0232173	1	-0.0655306	1	0.045899	1	-0.0540511	1	-0.0490048	1	-0.281296	1	-0.133053	1	-0.248312	1	-0.0692673	1	0.0502875	1	-0.019894	-0.136328	1	1	FALSE
Capzb	-0.0214865	1	-0.04468	1	0.0437262	1	-0.0564067	1	-0.0804951	1	0.0630738	1	0.0766705	1	0.0467975	1	0.0206008	1	0.203712	1	-0.0318684	0.0821708	1	1	FALSE
Car12	-0.0283164	1	-0.0630165	1	-0.00378432	1	-0.0202601	1	-0.00123453	1	-0.0260073	1	-0.00235454	1	0.025202	1	0.0368419	1	-0.0331862	1	-0.0233224	9.91685e-05	1	1	FALSE
Car13	0.0964343	1	0.00516503	1	0.0622903	1	0.152432	1	0.201368	8.65673e-11	0.121401	1	0.0333688	1	-0.0562094	1	0.19313	1	0.0380202	1	0.103538	0.0659422	1.24437e-06	1	FALSE
Car5b	-0.00682657	1	0.0883934	1	-0.13865	1	-0.203703	1	0.0414755	1	-0.0119767	1	0.0185923	1	-0.0671495	1	-0.173589	1	0.110134	1	-0.0438621	-0.0247977	1	1	FALSE
Car9	0.266429	1	0.406645	1	0.907477	1	0.459526	1	0.174026	1	0.268499	1	0.506975	1	0.372038	1	0.697189	1	0.299849	1	0.442821	0.42891	1	1	FALSE
Card10	0.172627	1	0.056294	1	-0.0281404	1	0.0518698	1	0.397131	1.51984e-28	0.0353334	1	-0.0825161	1	-0.112949	1	0.121778	1	0.151005	1	0.129956	0.0225303	1.13581e-22	1	FALSE
Card19	0.000968688	1	0.207145	1	0.140192	1	-0.0679106	1	0.056306	1	0.208283	0.0655945	0.328694	0.000468549	0.14823	1	-0.113511	1	0.19719	1	0.0673401	0.153777	1	0.022679	FALSE
Card6	-0.00503567	1	0.0102462	1	-0.019691	1	-0.0537603	1	-0.0330803	1	0.00284449	1	0.0134022	1	0.0206198	1	0.045891	1	-0.00534896	1	-0.0202642	0.0154817	1	1	FALSE
Carf	0.00708819	1	0.0052242	1	0.00828392	1	0.0336741	1	-0.00507497	1	0.00159285	1	0.0107278	1	-0.0157445	1	0.00268132	1	0.00326166	1	0.00983908	0.000503825	1	1	FALSE
Carhsp1	0.000448412	1	0.0264825	1	-0.000471248	1	0.0122401	1	-0.00491084	1	0.119517	1	0.202064	1	0.130441	1	0.0479333	1	0.100765	1	0.00675779	0.120144	1	1	FALSE
Carm1	-0.0160758	1	-0.0746555	1	-0.0787289	1	0.158054	1	-0.0411718	1	-0.0465935	1	-0.0405486	1	-0.0972077	1	0.0489985	1	-0.0424031	1	-0.0105156	-0.0355509	1	1	FALSE
Carmil1	-0.0153929	1	0.00472718	1	-0.0340551	1	-0.0820645	1	-0.0151794	1	-0.010975	1	-0.0453552	1	-0.0483999	1	0.0110026	1	-0.0277379	1	-0.0283929	-0.0242931	1	1	FALSE
Carnmt1	-0.070575	1	-0.00209362	1	-0.177352	1	-0.234475	1	0.0706579	1	-0.104031	1	-0.311396	1	-0.159865	1	-0.0749793	1	0.0258909	1	-0.0827675	-0.124876	1	1	FALSE
Cars	-0.0673119	1	-0.0948569	1	0.113738	1	-0.0503559	1	0.0180037	1	-0.127561	1	-0.0263338	1	-0.0414063	1	0.0164941	1	0.0868869	1	-0.0161566	-0.0183839	1	1	FALSE
Cars2	0.0381572	1	-0.0778173	1	-0.0386581	1	-0.00627032	1	-0.0270726	1	-0.05753	1	-0.0122561	1	0.0263023	1	-0.00451127	1	-0.0527225	1	-0.0223322	-0.0201435	1	1	FALSE
Casc3	0.0182156	1	-0.0382797	1	0.0925149	1	-0.0176629	1	0.00145364	1	0.014321	1	0.0419354	1	-0.0567265	1	-0.00147319	1	-0.0291874	1	0.0112483	-0.00622615	1	1	FALSE
Casc4	0.118912	1	-0.0151689	1	-0.0119764	1	0.0539776	1	-0.0959719	0.00120419	0.054398	1	0.0269141	1	-0.0685183	1	0.0224903	1	0.0782737	1	0.00995445	0.0227116	0.199901	1	FALSE
Casd1	-0.0790381	1	-0.0790863	1	-0.0981833	1	-0.130367	1	-0.062789	0.665535	-0.104053	1	0.00993174	1	-0.0101875	1	0.115232	1	0.00185725	1	-0.0898927	0.00255611	0.999933	1	FALSE
Cask	-0.112838	0.028371	-0.136916	0.169013	-0.0615817	1	0.0984163	1	-0.0395364	1	-0.109517	1	-0.080206	1	-0.18905	1	0.0946015	1	-0.188957	1	-0.0504913	-0.0946258	0.382959	1	FALSE
Caskin2	0.0248459	1	0.00415314	1	-0.0152089	1	-0.00876152	1	-0.0104638	1	0.0110999	1	-0.134192	1	-0.0229357	1	0.00195855	1	0.00584212	1	-0.00108703	-0.0276453	1	1	FALSE
Casp1	-0.245772	2.52666e-18	-0.0980702	1	-0.501949	0.021355	-0.466821	1	-0.314295	3.06048e-31	-0.18578	1	-0.229485	1	-0.258863	1	-0.185297	1	-0.310291	1	-0.325381	-0.233943	1.23046e-43	1	FALSE
Casp12	-0.122653	1.89928e-07	-0.122158	1	-0.28149	1	-0.0634478	1	-0.209457	3.51966e-23	-0.112284	1	-0.132009	1	-0.0745411	1	-0.132491	1	-0.12422	1	-0.159841	-0.115109	6.02588e-24	1	FALSE
Casp2	0.0148537	1	-0.0355031	1	0.00543218	1	-0.109069	1	-0.0101684	1	0.026549	1	-0.124257	1	0.0216714	1	-0.00583284	1	0.0331135	1	-0.026891	-0.00975113	1	1	FALSE
Casp3	0.101984	1	0.00606709	1	0.103071	1	0.439053	1	0.329693	4.47329e-09	-0.0774526	1	-0.121958	1	0.112763	1	-0.0322531	1	-0.340024	1	0.195974	-0.091785	3.16769e-05	1	FALSE
Casp4	-0.0703117	0.0043403	-0.00561812	1	-0.0238189	1	-0.252153	1	-0.0369316	1	0.0397924	1	-0.0254748	1	-0.0499475	1	-0.0714927	1	-0.0144092	1	-0.0777666	-0.0243064	0.366973	1	FALSE
Casp6	0.107392	1	0.0617193	1	0.292667	1	0.0117927	1	0.171523	0.83523	0.0201788	1	-0.0324786	1	-0.170662	1	-0.0835384	1	-0.0290517	1	0.129019	-0.0591104	0.999999	1	FALSE
Casp7	-0.0742263	9.54969e-05	-0.055522	1	-0.112955	1	-0.0712243	1	-0.059662	8.14522e-05	-0.0321001	1	-0.0441397	1	0.0154943	1	0.0245176	1	-0.140878	1	-0.074718	-0.0354211	4.93428e-05	1	FALSE
Casp8	-0.116302	0.359709	-0.0402889	1	-0.278005	1	-0.0924794	1	-0.108893	0.00120811	-0.222356	1	-0.0935754	1	0.00465782	1	-0.313147	1	-0.0251843	1	-0.127194	-0.129921	0.115442	1	FALSE
Casp8ap2	-0.0422222	1	-0.112905	1	-0.167957	1	-0.117543	1	-0.0242008	1	-0.00408558	1	-0.0750639	1	-0.0871273	1	-0.0217437	1	0.0467981	1	-0.0929655	-0.0282445	1	1	FALSE
Casp9	0.00356327	1	-0.0290724	1	-0.0152774	1	-0.0690688	1	0.00342811	1	-0.011616	1	0.0258873	1	0.00468701	1	0.00585379	1	-0.0420477	1	-0.0212854	-0.00344712	1	1	FALSE
Cast	0.0382939	1	0.0218217	1	-0.0822035	1	-0.0975183	1	-0.0575981	1	0.0219983	1	-0.0208502	1	0.0165443	1	-0.00176393	1	-0.0999986	1	-0.0354409	-0.016814	1	1	FALSE
Cat	-0.0697525	1	0.0338827	1	-0.0823771	1	0.0819066	1	-0.100203	2.80637e-05	-0.175282	0.0634797	-0.000564206	1	-0.149451	1	-0.0225504	1	-0.0860583	1	-0.0273088	-0.0867812	0.0213596	0.854305	FALSE
Cav1	0.0772026	0.209901	0.0457833	1	0.0851653	1	0.0244283	1	0.0764869	4.53082e-08	0.0371176	1	0.0462087	1	0.0628519	1	0.0168619	1	0.0504777	1	0.0618133	0.0427036	5.79205e-05	1	FALSE
Cav2	0.0560974	1	0.125675	1	0.088069	1	0.0307983	1	0.0731101	1	-0.0192341	1	-0.0460554	1	-0.0953186	1	0.0335892	1	0.0775353	1	0.07475	-0.00989674	1	1	FALSE
Cavin1	0.0850596	1	0.204871	1	0.0389978	1	-0.0804216	1	-0.0126994	1	0.017034	1	-0.0602586	1	0.197882	1	0.112202	1	-0.0331002	1	0.0471615	0.046752	1	1	FALSE
Cavin2	-0.0903517	1	-0.0704107	1	-0.10277	1	0.0596794	1	-0.222158	2.98221e-31	-0.165826	1	-0.112218	1	-0.298326	1	-0.133215	1	-0.0542633	1	-0.0852022	-0.15277	3.21294e-25	1	FALSE
Cavin3	-0.0430744	1	0.311336	0.476478	0.269964	1	0.220826	1	0.168319	1	0.244015	1	0.19846	1	0.177859	1	-0.0173996	1	-0.034442	1	0.185474	0.113698	0.998988	1	FALSE
Cbarp	-0.0169627	1	0.0617865	1	-0.0442973	1	0.0208063	1	-0.0238921	1	-0.0226898	1	0.0326216	1	0.0471131	1	0.0660738	1	-0.00261071	1	-0.000511866	0.0241016	1	1	FALSE
Cbfa2t2	0.0261965	1	-0.0296044	1	-0.0895157	1	0.0453181	1	-0.041915	1	0.0319026	1	0.0240354	1	-0.0150367	1	-0.0797571	1	-0.0388744	1	-0.0179041	-0.015546	1	1	FALSE
Cbfb	-0.0603004	1	-0.230558	0.000271348	0.0539708	1	0.0762935	1	-0.0364346	1	-0.0850425	1	-0.00488191	1	-0.0389039	1	-0.1205	1	-0.115931	1	-0.0394057	-0.0730518	0.0881156	1	FALSE
Cbl	0.00878088	1	-0.00588125	1	-0.0253875	1	-0.0848872	1	-0.0403899	1	-0.0306053	1	-0.0329593	1	-0.145728	1	-0.000904768	1	-0.0462961	1	-0.029553	-0.0512986	1	1	FALSE
Cblb	0.0961921	1	-0.00220376	1	0.0323602	1	-0.108132	1	0.0863678	1	0.0171662	1	0.0104759	1	-0.0751655	1	0.186021	1	-0.291916	1	0.0209169	-0.0306836	1	1	FALSE
Cblc	-0.0520311	0.294435	0.0446779	1	-0.00643683	1	0.0953442	1	-0.0550033	0.0266745	-0.0178449	1	-0.104926	1	-0.00653645	1	-0.107064	1	-0.0710368	1	0.00531018	-0.0614817	0.467784	1	FALSE
Cbll1	0.0301182	1	-0.0385914	1	-0.0670232	1	-0.00812953	1	-0.00799394	1	0.0314795	1	0.0580879	1	-0.000434851	1	-0.0186324	1	-0.0145601	1	-0.018324	0.011188	1	1	FALSE
Cbr1	-0.0298728	1	-0.0365228	1	-0.00451951	1	-0.0522351	1	-0.0744696	7.2517e-07	-0.00678791	1	-0.080108	1	-0.12301	1	-0.0137692	1	-0.0330532	1	-0.039524	-0.0513457	0.00163172	1	FALSE
Cbr4	-0.0393753	1	0.000435387	1	-0.0955477	1	-0.0416507	1	-0.0309162	1	-0.07813	1	0.03033	1	0.0668695	1	0.00814771	1	-0.0320272	1	-0.0414109	-0.000961988	1	1	FALSE
Cbwd1	-0.0373414	1	-0.0906417	1	0.0454557	1	0.0607099	1	-0.0633644	1	-0.232937	1	0.0346305	1	-0.0109749	1	-0.0494129	1	-0.190638	1	-0.0170364	-0.0898666	1	1	FALSE
Cbx1	-0.133677	0.348964	-0.110299	1	-0.331956	1	-0.0044786	1	-0.124648	0.00153935	-0.0914107	1	0.0705871	1	-0.273549	1	-0.176322	1	-0.113307	1	-0.141012	-0.1168	0.129949	1	FALSE
Cbx3	-0.0634268	1	0.126821	1	-0.12091	1	-0.0078838	1	-0.224842	1.29769e-10	-0.436586	3.67931e-07	-0.49604	6.39795e-06	-0.495022	0.146084	-0.330408	1	-0.473093	1	-0.0580482	-0.44623	1.74417e-06	1.12258e-08	FALSE
Cbx4	0.0153576	1	0.107196	1	-0.046982	1	0.064161	1	-0.0334146	1	0.127493	1	0.115719	1	0.206664	1	0.0937387	1	-0.215607	1	0.0212635	0.0656014	1	1	FALSE
Cbx5	-0.0626794	1	-0.0388902	1	-0.185303	1	0.236122	1	-0.091155	0.0194127	-0.0757967	1	-0.080549	1	0.155949	1	0.120796	1	-0.0655723	1	-0.028381	0.0109653	0.6402	1	FALSE
Cbx6	0.0399799	1	0.0236801	1	-0.0274628	1	0.123147	1	-0.0211691	1	0.0707855	1	-0.0825741	1	-0.119615	1	-0.0893261	1	-0.0126808	1	0.0276351	-0.0466821	1	1	FALSE
Cbx7	0.0165272	1	0.032108	1	-0.00559242	1	-0.0108121	1	0.0115651	1	0.0161189	1	0.0303988	1	-0.00326405	1	-0.0222593	1	-0.00837101	1	0.00875914	0.00252465	1	1	FALSE
Cbx8	-0.000750664	1	0.0152145	1	-0.0692097	1	-0.0324043	1	-0.00259162	1	0.0227503	1	-0.0177662	1	0.0879462	1	0.0560422	1	-0.0434314	1	-0.0179484	0.0211082	1	1	FALSE
Cby1	-0.0291725	1	0.00171064	1	0.00121742	1	-0.0432807	1	0.0126668	1	0.00967756	1	-0.126532	1	-0.00212628	1	0.0510283	1	0.190929	1	-0.0113717	0.0245953	1	1	FALSE
Cc2d1a	-0.0378403	1	-0.0690556	1	0.000982756	1	0.0446384	1	0.00929753	1	-0.00140154	1	0.0151558	1	-0.0608133	1	0.100005	1	-0.0823784	1	-0.0103954	-0.00588659	1	1	FALSE
Cc2d1b	0.0245485	1	-0.0527379	1	0.0168314	1	-0.0274211	1	0.0182594	1	-0.0188655	1	-0.0477376	1	0.0408658	1	-0.129953	1	-0.0142092	1	-0.00410396	-0.0339799	1	1	FALSE
Cc2d2a	0.0568473	1	0.0153841	1	-0.108964	1	-0.0561327	1	0.0748299	1	0.00662444	1	-0.0873923	1	-0.103302	1	-0.0272381	1	-0.00728217	1	-0.00360704	-0.043718	1	1	FALSE
Ccar1	-0.0723776	1	-0.0573463	1	-0.282803	1	-0.133698	1	-0.137957	0.00929619	0.0361035	1	-0.155754	1	-0.217536	1	-0.0751055	1	0.0784873	1	-0.136837	-0.066761	0.498656	1	FALSE
Ccar2	0.0103967	1	-0.0299312	1	-0.0650726	1	0.0140582	1	-0.00917088	1	0.00183252	1	-0.0310418	1	-0.0485156	1	-0.0884959	1	-0.0263833	1	-0.015944	-0.0385208	1	1	FALSE
Ccbe1	-0.397388	3.15809e-16	-0.445297	8.04496e-07	-0.429877	1	-0.0189967	1	-0.439284	7.09675e-34	-0.410727	1	-0.301003	1	-0.124355	1	-0.203177	1	-0.316824	1	-0.346169	-0.271217	1.95838e-48	1	FALSE
Ccdc102a	-0.0643804	0.00588484	-0.0562376	0.304777	-0.167293	1	-0.0310859	1	-0.113127	9.20246e-21	-0.0316877	1	-0.0197458	1	-0.0129888	1	-0.109752	1	-0.0375205	1	-0.0864248	-0.042339	5.62868e-18	1	FALSE
Ccdc107	0.206575	7.16117e-08	0.113369	1	0.321364	1	0.130736	1	0.217345	1.27834e-09	0.174575	4.32907e-06	0.182586	1	0.139193	1	0.103587	1	0.0357886	1	0.197878	0.127146	7.92885e-12	0.00594344	FALSE
Ccdc112	0.0299393	1	-0.0536187	1	-0.00433325	1	-0.0197037	1	-0.0151381	1	-0.00750863	1	0.0384871	1	0.0321077	1	0.0421507	1	0.0179044	1	-0.0125709	0.0246283	1	1	FALSE
Ccdc114	-0.0632484	1.02792e-05	-0.0539201	1	-0.0579921	1	-0.0721583	1	-0.0158574	1	-0.0193593	1	-0.0312245	1	-0.0458567	1	-0.00240426	1	-0.00398658	1	-0.0526353	-0.0205663	0.010855	1	FALSE
Ccdc115	0.0149359	1	0.000118577	1	0.116003	1	0.00737109	1	0.0317413	1	0.0166555	1	0.0595207	1	0.0292383	1	-0.0614696	1	0.0675832	1	0.0340339	0.0223056	1	1	FALSE
Ccdc117	-0.0158045	1	0.0325829	1	-0.00337433	1	-0.00892819	1	-0.0110257	1	0.00212358	1	-0.0136076	1	-0.0422545	1	0.274875	1	-0.0141054	1	-0.00130996	0.0414063	1	1	FALSE
Ccdc12	-0.153864	0.32242	-0.0251088	1	-0.0656203	1	0.0696083	1	-0.146003	3.40168e-07	0.115369	1	-0.0181731	1	-0.0597488	1	-0.0124302	1	-0.0497604	1	-0.0641975	-0.00494867	0.000392608	1	FALSE
Ccdc120	0.0041291	1	-0.027866	1	-0.00135356	1	-0.0252832	1	-0.00324483	1	0.0022327	1	0.0216362	1	-0.010602	1	-0.00944237	1	-0.0150544	1	-0.0107237	-0.00224596	1	1	FALSE
Ccdc122	0.0502849	1	0.0513172	1	-0.0470481	1	0.160181	1	-0.00706193	1	0.0165183	1	0.0168283	1	0.0203704	1	-0.0233464	1	-0.0278865	1	0.0415346	0.000496821	1	1	FALSE
Ccdc124	-0.0642991	1	-0.0423847	1	0.0823535	1	-0.107894	1	0.126406	1	0.0749779	1	0.0752438	1	0.0885605	1	-0.275328	1	0.192029	1	-0.00116369	0.0310965	1	1	FALSE
Ccdc125	-0.00873349	1	-0.03274	1	-0.00196043	1	-0.0607923	1	-0.013906	1	0.00142382	1	0.00893328	1	-0.0211065	1	-0.0463774	1	-0.0519508	1	-0.0236264	-0.0218155	1	1	FALSE
Ccdc126	-0.0146451	1	-0.0294316	1	-0.0150648	1	-0.140284	1	-0.0146827	0.431221	-0.0763412	1	-0.0103578	1	0.0243789	1	-0.000825328	1	-0.0419064	1	-0.0428217	-0.0210104	0.998246	1	FALSE
Ccdc127	0.0243323	1	-0.0763198	1	0.159001	1	-0.0788319	1	-0.00254898	1	0.0458999	1	-0.0592724	1	-0.152234	1	-0.0775341	1	0.0597628	1	0.00512663	-0.0366755	1	1	FALSE
Ccdc130	0.0250285	1	0.0226385	1	-0.013247	1	-0.0320403	1	0.0153788	1	0.0251014	1	0.0481359	1	0.0189634	1	-0.0620074	1	-0.0243412	1	0.00355169	0.00117042	1	1	FALSE
Ccdc136	0.0097951	1	0.0288864	1	0.0431829	1	0.0671571	1	-0.0129976	1	-0.0473815	1	-0.0407066	1	0.00218861	1	0.0743538	1	0.0102526	1	0.0272048	-0.000258624	1	1	FALSE
Ccdc137	0.0196655	1	-0.0498894	1	0.0200183	1	0.119245	1	-0.00984741	1	-0.0168302	1	-0.0824762	1	-0.0288401	1	0.0181175	1	-0.0555389	1	0.0198385	-0.0331136	1	1	FALSE
Ccdc138	-0.00400517	1	-0.022693	1	-0.0269258	1	-0.00109329	1	-0.00810737	1	-0.0472442	1	-0.152046	1	-0.0155561	1	-0.00843319	1	0.0343815	1	-0.0125649	-0.0377797	1	1	FALSE
Ccdc14	0.00905345	1	-0.0270648	1	0.00153102	1	0.0010066	1	-0.000684328	1	0.0224324	1	0.0124503	1	0.00053918	1	0.0255959	1	-0.0076828	1	-0.0032316	0.010667	1	1	FALSE
Ccdc149	0.00154869	1	0.00767707	1	-0.021536	1	0.0503593	1	0.0146095	1	0.00796596	1	0.00982847	1	-0.00729893	1	0.000793418	1	-0.00624173	1	0.0105317	0.00100944	1	1	FALSE
Ccdc15	-0.0364779	1	-0.0656087	1	0.0236044	1	-0.0179645	1	-0.0206273	1	-0.200809	1	-0.00955311	1	0.00794925	1	0.00520982	1	0.019069	1	-0.0234148	-0.0356269	1	1	FALSE
Ccdc157	8.40265e-05	1	-0.0435885	1	-0.0428948	1	-0.0206568	1	-0.0205506	1	0.0181182	1	-0.0429824	1	-0.0157662	1	0.000484276	1	0.0257243	1	-0.0255213	-0.00288435	1	1	FALSE
Ccdc163	0.0565129	1	0.0087451	1	-0.0422073	1	0.0188456	1	0.0101604	1	-0.00963421	1	0.0261825	1	0.0672422	1	-0.0344097	1	0.0269148	1	0.0104113	0.0152591	1	1	FALSE
Ccdc167	0.0173955	1	0.0250258	1	0.0250924	1	0.0168452	1	0.00856802	1	-0.0118223	1	-0.213587	1	0.0341565	1	0.0965112	1	0.000316326	1	0.0185854	-0.018885	1	1	FALSE
Ccdc173	-0.0188931	1	-0.019032	1	0.031613	1	0.0295132	1	-0.0163862	1	0.0102065	1	0.0183221	1	0.0819106	1	0.0324269	1	0.0326351	1	0.00136295	0.0351002	1	1	FALSE
Ccdc174	-0.0480559	1	0.0450685	1	0.00676289	1	-0.0270831	1	-0.018725	1	0.0356123	1	-0.140513	1	0.0538099	1	-0.204883	1	-0.0525668	1	-0.00840652	-0.0617081	1	1	FALSE
Ccdc18	0.00443332	1	-0.0280524	1	0.0721381	1	-0.0698991	1	0.00744572	1	0.035111	1	-0.0510176	1	-0.0103883	1	-0.127697	1	0.0642341	1	-0.00278688	-0.0179516	1	1	FALSE
Ccdc181	0.0307274	1	-0.0144172	1	0.0685474	1	0.0149795	1	0.0251466	1	0.0426203	1	0.0119107	1	0.0441643	1	-0.0267258	1	0.0326527	1	0.0249968	0.0209244	1	1	FALSE
Ccdc186	0.0618396	1	-0.0165195	1	-0.117199	1	-0.106065	1	-0.0615057	1	-0.110653	1	0.154474	1	0.0672868	1	-0.00205111	1	0.0882956	1	-0.0478899	0.0394706	1	1	FALSE
Ccdc189	-0.000646035	1	0.00544074	1	-0.080098	1	0.00046324	1	0.0143359	1	0.0286728	1	0.0215505	1	-0.0147449	1	0.0631168	1	0.000969044	1	-0.0121008	0.0199129	1	1	FALSE
Ccdc191	0.0178341	1	0.0814332	1	-0.01909	1	0.0828127	1	0.0415966	1	0.067174	1	0.00506657	1	0.0147346	1	0.0883162	1	0.0454146	1	0.0409173	0.0441412	1	1	FALSE
Ccdc22	-0.078581	0.00981967	-0.0320734	0.438045	-0.0738883	1	0.0839786	1	-0.0620979	0.000368119	0.00810827	1	-0.032682	1	-0.0415461	1	-0.118958	1	-0.0545061	1	-0.0325324	-0.0479167	0.00289206	1	FALSE
Ccdc25	-0.0700191	1	-0.0673852	1	-0.0120584	1	-0.0303874	1	-0.0753153	0.0603974	-0.00326418	1	0.00642214	1	-0.107894	1	-0.127967	1	-0.125838	1	-0.0510331	-0.0717081	0.846614	1	FALSE
Ccdc28a	0.000490737	1	0.0194464	1	0.00356233	1	0.146576	1	-0.00105241	1	-0.00674662	1	0.0111621	1	0.029333	1	-0.0322243	1	0.00341663	1	0.0338045	0.000988171	1	1	FALSE
Ccdc28b	0.00228297	1	0.00424777	1	-0.015104	1	-0.0463803	1	-0.00409641	1	0.00986778	1	0.0328324	1	0.0324614	1	0.0480929	1	0.0230372	1	-0.01181	0.0292583	1	1	FALSE
Ccdc32	0.0581904	1	0.00723602	1	-0.00172932	1	-0.050343	1	0.0659035	1	0.0486146	1	0.0574274	1	0.0303787	1	0.0324477	1	0.0189894	1	0.0158515	0.0375715	1	1	FALSE
Ccdc34	-0.147205	1	-0.0454546	1	-0.0177825	1	0.24605	1	-0.176127	0.000127844	0.120749	1	0.197618	1	-0.00145832	1	0.415979	1	0.248364	1	-0.0281039	0.19625	0.0561662	1	FALSE
Ccdc43	-0.0879262	0.0360617	-0.0515058	1	-0.178204	1	-0.0624891	1	-0.0171517	1	-0.079355	1	-0.052187	1	-0.242979	1	-0.127616	1	-0.10254	1	-0.0794553	-0.120935	0.758476	1	FALSE
Ccdc47	0.126556	1	-0.0962288	1	0.0450989	1	-0.0766573	1	0.0140034	1	0.186013	1	0.127037	1	0.133161	1	0.168437	1	0.0447896	1	0.00255444	0.131888	1	1	FALSE
Ccdc50	0.0860083	1	0.0627944	1	-0.257783	1	0.202016	1	-0.0016929	1	0.119222	1	-0.0113291	1	0.018954	1	0.405394	1	0.076118	1	0.0182685	0.121672	1	1	FALSE
Ccdc51	0.0195066	1	0.024468	1	0.0442126	1	0.0925667	1	0.0202644	1	-0.00189557	1	-0.00508891	1	-0.000749144	1	0.0524158	1	0.0522334	1	0.0402037	0.0193831	1	1	FALSE
Ccdc58	-0.011181	1	-0.0161192	1	0.191276	1	0.105161	1	-0.0125134	1	-0.0605925	1	-0.101804	1	0.203876	1	-0.0699302	1	0.203772	1	0.0513245	0.0350643	1	1	FALSE
Ccdc59	0.0205969	1	-0.19664	1	-0.0920162	1	-0.0481466	1	-0.0360178	1	-0.00394583	1	0.167177	1	-0.121788	1	-0.309254	1	-0.0653051	1	-0.0704448	-0.0666233	1	1	FALSE
Ccdc6	0.0103815	1	0.0388061	1	-0.151213	1	-0.114244	1	-0.0255815	1	-0.0390104	1	-0.0831359	1	-0.00885183	1	-0.0831189	1	-0.0336138	1	-0.0483702	-0.0495462	1	1	FALSE
Ccdc61	-0.0160621	1	-0.0524931	1	0.0343734	1	-0.0676267	1	-0.00363875	1	-0.0506112	1	-0.0106684	1	0.0699843	1	-0.0480926	1	-0.0761494	1	-0.0210894	-0.0231074	1	1	FALSE
Ccdc66	-0.0814136	0.915742	-0.028343	1	-0.213273	1	0.00803664	1	-0.0479571	1	0.0192427	1	0.00133539	1	0.0497298	1	0.0214076	1	-0.0435215	1	-0.0725901	0.00963879	1	1	FALSE
Ccdc68	-0.107479	0.00610227	-0.0327696	1	-0.198828	1	0.0337552	1	0.0182575	1	-0.0222857	1	0.0188423	1	0.0811326	1	0.0515828	1	-0.0996576	1	-0.0574128	0.00592291	0.423281	1	FALSE
Ccdc71	0.0345701	1	0.00982167	1	0.0481181	1	-0.0533712	1	0.0302027	1	0.0243391	1	0.0478422	1	0.0745586	1	0.163953	1	0.0603448	1	0.0138683	0.0742076	1	1	FALSE
Ccdc71l	-0.0349431	1	0.0116521	1	0.0355014	1	-0.0795776	1	-0.0413004	1	-0.00165463	1	0.051457	1	-0.0576761	1	-0.0127248	1	-0.137678	1	-0.0217335	-0.0316552	1	1	FALSE
Ccdc77	0.00995787	1	0.0206237	1	0.0252772	1	-0.0355602	1	-0.00715926	1	-0.0490033	1	-0.0166228	1	-0.0174422	1	0.0393257	1	0.0102599	1	0.00262786	-0.00669654	1	1	FALSE
Ccdc82	0.0563936	1	-0.0594684	1	-0.0981676	1	0.1054	1	-0.063257	1	0.0954877	1	0.0266179	1	0.0804576	1	-0.0321537	1	0.0776231	1	-0.0118198	0.0496065	1	1	FALSE
Ccdc84	0.0279929	1	-0.0377076	1	0.0505874	1	0.0850161	1	-0.00395109	1	-0.00858368	1	-0.0215474	1	-0.097716	1	-0.00974791	1	0.0428277	1	0.0243875	-0.0189535	1	1	FALSE
Ccdc85b	-0.0747405	1	-0.192629	0.267444	-0.267782	1	0.0509123	1	-0.126174	0.00603368	0.0874201	1	0.088277	1	-0.160459	1	0.102836	1	-0.111573	1	-0.122083	0.00130027	0.231692	1	FALSE
Ccdc85c	-0.00977015	1	0.00489077	1	-0.00923441	1	-0.00884682	1	-0.00505127	1	-0.0377559	1	-0.079545	0.0151291	-0.0404867	1	-0.0128569	1	-0.0473288	1	-0.00560238	-0.0435946	1	0.591551	FALSE
Ccdc86	-0.145728	0.00243419	-0.197622	0.0944676	-0.0815901	1	-0.149323	1	-0.0692034	1	-0.116524	1	0.0345064	1	-0.316907	1	-0.0876695	1	0.0380896	1	-0.128693	-0.0897009	0.0799576	1	FALSE
Ccdc88a	0.0663034	1	0.0846838	1	-0.0331277	1	0.0380976	1	0.136289	1	-0.21528	1	0.170829	1	0.0427901	1	-0.0463744	1	0.0962024	1	0.0584492	0.00963339	1	1	FALSE
Ccdc88c	-0.0199955	1	-0.0230361	1	-0.067816	1	0.0722486	1	-0.0477558	1	0.0310634	1	-0.00234516	1	-0.0159907	1	0.0228902	1	-0.00633838	1	-0.017271	0.00585587	1	1	FALSE
Ccdc9	0.0221368	1	0.0634696	1	-0.0398426	1	-0.0852744	1	0.0126908	1	0.0802959	1	0.0253517	1	0.0654078	1	-0.0942384	1	0.064319	1	-0.00536394	0.0282272	1	1	FALSE
Ccdc90b	-0.0213513	1	0.024774	1	0.171252	1	0.0419125	1	-0.0584175	3.19509e-06	-0.0466664	1	-0.00543321	1	0.0510782	1	0.0590148	1	-0.00450453	1	0.0316339	0.0106978	0.00479164	1	FALSE
Ccdc91	0.0409386	1	0.0158344	1	0.0634233	1	-5.76268e-05	1	0.0257237	1	-0.0334436	1	-0.0153378	1	-0.0386507	1	-0.0832884	1	-0.0145372	1	0.0291725	-0.0370515	1	1	FALSE
Ccdc92	-0.000753185	1	0.0226273	1	-0.0273597	1	0.000344674	1	0.0170048	1	0.00951362	1	-0.109693	1	0.023652	1	0.063277	1	0.0340016	1	0.00237277	0.00415033	1	1	FALSE
Ccdc93	0.00643474	1	-0.029288	1	-0.100019	1	-0.0253169	1	0.00869187	1	0.0153246	1	0.0449946	1	-0.085677	1	-0.0119253	1	0.03534	1	-0.0278994	-0.000388612	1	1	FALSE
Ccdc94	0.0153694	1	-0.00391099	1	0.0148502	1	0.0576656	1	0.00762579	1	0.00576769	1	-0.0134518	1	-0.0290517	1	0.00378765	1	-0.00630348	1	0.01832	-0.00785032	1	1	FALSE
Ccdc97	0.00656549	1	-0.0704255	1	-0.0216767	1	0.00297339	1	-0.00278228	1	-0.00426984	1	-0.0102039	1	-0.030716	1	0.0374182	1	0.0310877	1	-0.0170691	0.00466323	1	1	FALSE
Cchcr1	0.0353373	1	-0.00811576	1	-0.0343686	1	0.155957	1	-0.0325973	1	0.027229	1	-0.00169193	1	-0.0232762	1	0.00758617	1	0.105865	1	0.0232424	0.0231423	1	1	FALSE
Ccl2	-0.0403302	1	-0.904184	1	-0.244025	1	-0.122517	1	-0.206191	0.0677366	-0.403735	1	-0.0526702	1	1.27895	1	0.20289	1	0.0948028	1	-0.303449	0.224047	0.864077	1	FALSE
Ccl25	0.0291273	1	-0.115625	0.117996	0.0251694	1	-0.0957765	1	-0.00770106	1	0.0445512	1	-0.100149	1	0.0256772	1	0.0449421	1	0.0721967	1	-0.0329611	0.0174437	0.93413	1	FALSE
Ccl3	0.171207	1	0.182442	1	0.0204836	1	-0.0417314	1	0.0595529	1	0.459836	1	-0.121405	1	0.792693	1	-0.450665	1	0.373436	1	0.0783909	0.210779	1	1	FALSE
Ccl4	0.217903	1	0.0067256	1	0.0379377	1	-0.0696045	1	0.0815909	1	0.571736	1	0.0405771	1	-0.00188894	1	-0.477806	1	0.171295	1	0.0549105	0.0607825	1	1	FALSE
Ccl8	0.0419759	0.000384745	0.0361588	1	0.024687	1	0.0177082	1	0.0595272	2.13419e-09	0.179983	1	-0.0161826	1	0.0053866	1	0.358513	1	0.0129549	1	0.0360114	0.108131	2.38086e-08	1	FALSE
Ccm2	-0.0235215	1	-0.0792666	1	-0.0654736	1	0.222415	1	-0.0315989	1	0.0294211	1	0.0954701	1	-0.142614	1	-0.251003	1	-0.591314	1	0.00451096	-0.172008	1	1	FALSE
Ccna2	-0.0375597	1	-0.0426261	1	-0.134365	1	0.0506113	1	0.0271145	1	-0.0151379	1	-0.0713779	1	-0.0522478	1	-0.0376618	1	0.245642	1	-0.0273651	0.0138433	1	1	FALSE
Ccnb1	-0.0529475	1	-0.10275	1	0.129254	1	-0.124604	1	0.0715687	1	0.0237082	1	-0.155239	1	-0.304978	1	0.0331539	1	0.182779	1	-0.0158958	-0.0441151	1	1	FALSE
Ccnb1ip1	0.0238646	1	-0.0199867	1	-0.0448362	1	-0.0532476	1	0.0227171	1	-0.0186855	1	-0.209483	1	-0.0332421	1	-0.0239542	1	0.00813291	1	-0.0142978	-0.0554465	1	1	FALSE
Ccnb2	-0.168722	1	-0.0859185	1	0.240241	1	-0.205491	1	0.0317345	1	0.0154774	1	-0.00598376	1	-0.384631	1	-0.153562	1	0.307972	1	-0.037631	-0.0441454	1	1	FALSE
Ccnc	-0.0383546	1	-0.0635756	0.730103	0.0308539	1	0.0580969	1	-0.0488638	0.251229	-0.0411892	1	-0.0166504	1	-0.241759	1	-0.195357	1	0.000873208	1	-0.0123686	-0.0988166	0.970641	1	FALSE
Ccnd1	-0.404194	1.99425e-07	-0.00961234	1	0.181394	1	0.249058	1	-0.216866	0.000169533	-0.231809	1	0.119565	1	-0.0927403	1	0.269349	1	-0.383666	1	-0.040044	-0.0638605	5.65678e-07	1	FALSE
Ccnd3	0.00524206	1	-0.0252298	1	-0.0827102	1	0.0540599	1	-0.0829939	0.00625839	0.0716109	1	-0.155696	1	-0.119234	1	0.0151102	1	0.0214157	1	-0.0263264	-0.0333587	0.427635	1	FALSE
Ccndbp1	-0.026227	1	0.0648966	1	-0.0153957	1	0.16088	1	-0.0204813	1	0.0694892	1	0.100394	1	0.0132172	1	0.0565107	1	7.7314e-05	1	0.0327345	0.0479377	1	1	FALSE
Ccne1	0.0338475	1	-0.0319886	1	-0.0595397	1	0.046133	1	0.0031963	1	-0.0432673	1	-0.00143043	1	-0.0452474	1	-0.0112436	1	0.00241936	1	-0.00167029	-0.0197539	1	1	FALSE
Ccne2	0.0142052	1	-0.0268353	1	-0.00987873	1	0.0594249	1	0.0142636	1	-0.0157694	1	-0.0131906	1	-0.0109259	1	-0.0511669	1	0.0129909	1	0.0102359	-0.0156124	1	1	FALSE
Ccnf	-0.0242949	1	0.03196	1	0.088225	1	0.00232768	1	0.0280482	1	-0.0106438	1	-0.0335881	1	0.0401097	1	0.0525141	1	0.0528478	1	0.0252532	0.0202479	1	1	FALSE
Ccng1	0.0400445	1	-0.0493844	1	-0.0623369	1	-0.060355	1	0.00214491	1	0.0251244	1	-0.0720171	1	-0.0392069	1	0.0140045	1	-0.0211196	1	-0.0259774	-0.0186429	1	1	FALSE
Ccng2	0.0298178	1	0.0142597	1	0.0458693	1	0.115322	1	-0.00927853	1	-0.063447	1	0.025689	1	0.0773427	1	0.000949664	1	0.0126248	1	0.0391979	0.0106318	1	1	FALSE
Ccnh	-0.00949431	1	-0.0311381	1	-0.0537048	1	-0.0527345	1	-0.0378472	1	0.0433323	1	-0.0141902	1	0.0548899	1	0.00492439	1	0.00472892	1	-0.0369838	0.0187371	1	1	FALSE
Ccni	-0.00920128	1	-0.0187066	1	-0.0224357	1	-0.194869	1	-0.0997808	0.10354	-0.0277259	1	-0.0256595	1	0.121416	1	0.100843	1	0.0699972	1	-0.0689986	0.0477741	0.919968	1	FALSE
Ccnk	-0.0120131	1	0.0141539	1	-0.0386076	1	-0.0103738	1	0.016534	1	-0.0654894	1	0.0175238	1	-0.0814442	1	0.0546217	1	-0.0865019	1	-0.00606133	-0.032258	1	1	FALSE
Ccnl1	-0.15508	1	-0.0665027	1	-0.538302	1	-0.494517	1	-0.282272	4.43999e-07	-0.25033	1	-0.0597253	1	-0.0325709	1	-0.202708	1	-0.340707	1	-0.307335	-0.177208	0.00113296	1	FALSE
Ccnl2	-0.102094	0.866571	-0.134054	1	-0.251636	1	-0.362415	1	-0.198952	1.6419e-13	-0.0229452	1	-0.0716526	1	-0.134002	1	0.157349	1	-0.206278	1	-0.20983	-0.0555056	5.21972e-09	1	FALSE
Ccnt1	-0.0646734	1	-0.0377211	1	-0.15554	1	-0.191884	1	-0.00520112	1	-0.0111432	1	-0.00649101	1	-0.0242701	1	0.0259877	1	-0.0400928	1	-0.0910038	-0.0112019	1	1	FALSE
Ccnt2	-0.028162	1	-0.0748197	1	-0.021156	1	0.142683	1	-0.100302	0.0205411	0.00843093	1	-0.00691226	1	-0.0243553	1	-0.0196923	1	0.00273558	1	-0.0163514	-0.00795867	0.651228	1	FALSE
Ccny	-0.0513854	1	-0.0285133	1	-0.0997328	1	0.0209251	1	-0.0755293	0.0299989	-0.00936007	1	0.0708743	1	0.103282	1	0.0294185	1	-0.0142582	1	-0.0468471	0.0359914	0.724199	1	FALSE
Ccnyl1	0.0122531	1	-0.0113571	1	-0.0407122	1	-0.0554063	1	0.019097	1	0.0357869	1	-0.00455912	1	-0.011866	1	-0.0138759	1	-0.053822	1	-0.0152251	-0.00966722	1	1	FALSE
Ccp110	0.0221401	1	0.00121364	1	0.019923	1	-0.0152485	1	0.0108255	1	0.0069242	1	-0.0212314	1	-0.00892612	1	0.0327868	1	0.0428565	1	0.00777077	0.010482	1	1	FALSE
Ccpg1	0.0224234	1	0.0201971	1	-0.0230901	1	-0.0546576	1	0.00316469	1	-0.0101941	1	0.0120795	1	-0.0215858	1	0.0340964	1	-0.0100395	1	-0.0063925	0.00087131	1	1	FALSE
Ccpg1os	0.00731784	1	-0.00775726	1	-0.025651	1	0.0361886	1	0.00506462	1	0.0184172	1	0.0466606	1	0.0671174	1	0.115832	1	0.0871597	1	0.00303256	0.0670374	1	1	FALSE
Ccrl2	0.0586246	1	0.028393	1	-0.0398914	1	-0.0707608	1	-0.0013873	1	0.420065	1	0.0787472	1	0.359487	1	0.332376	1	0.318611	1	-0.00500437	0.301857	1	1	FALSE
Ccs	-0.0773563	1	0.0419717	1	-0.00207701	1	0.0428825	1	-0.0917012	0.0337851	-0.0493301	1	0.182826	1	-0.0355612	1	0.0935631	1	0.0932222	1	-0.0172561	0.056944	0.746458	1	FALSE
Ccsap	0.0233064	1	-0.0836598	1	-0.0442956	1	-0.0675386	1	0.0258456	1	0.0765157	1	-0.040107	1	0.0588685	1	0.48906	1	0.044254	1	-0.0292684	0.125718	1	1	FALSE
Ccser2	0.0258694	1	-0.109323	0.895434	-0.066448	1	-0.0423402	1	0.0112564	1	0.00664489	1	-0.216946	1	-0.0544408	1	0.2381	1	-0.00222345	1	-0.036197	-0.00577316	1	1	FALSE
Cct2	-0.0529693	1	-0.181788	1	-0.234982	1	-0.145407	1	0.0144666	1	-0.104085	1	-0.147646	1	0.00355243	1	0.00580396	1	0.00625562	1	-0.120136	-0.0472239	1	1	FALSE
Cct3	-0.208389	0.00511967	-0.195314	1	-0.145866	1	-0.244674	1	-0.153708	0.00346932	-0.217631	1	-0.225508	1	-0.131318	1	-0.142449	1	-0.153355	1	-0.18959	-0.174052	0.015744	1	FALSE
Cct4	-0.14098	0.160115	-0.244932	0.0155676	-0.0891842	1	-0.251347	1	-0.0513463	1	-0.187482	1	-0.259623	1	-0.1194	1	-0.15095	1	-0.0119724	1	-0.155558	-0.145886	0.285803	1	FALSE
Cct5	-0.251374	1.09959e-08	-0.0803528	1	-0.137786	1	-0.012341	1	-0.126541	0.00534352	-0.0428875	1	-0.116075	1	0.0938443	1	-0.0165897	1	-0.13072	1	-0.121679	-0.0424856	8.99773e-07	1	FALSE
Cct7	-0.136502	0.711136	-0.183048	1	0.0534211	1	-0.119265	1	-0.147663	1.9451e-06	-0.214123	1	-0.402319	1	0.0547403	1	-0.178957	1	-0.0320276	1	-0.106611	-0.154537	0.0026213	1	FALSE
Cct8	-0.113853	1	-0.264441	0.032794	-0.0711766	1	-0.28933	1	-0.0428534	1	-0.142749	1	-0.166965	1	-0.273469	1	-0.0587439	1	-0.12403	1	-0.156331	-0.153192	0.740923	1	FALSE
Ccz1	-0.133277	0.838333	-0.18803	0.0188183	0.023943	1	0.038666	1	-0.0368255	1	-0.0735393	1	-0.221233	1	-0.0699868	1	-0.0503602	1	-0.149909	1	-0.0591046	-0.113006	0.599702	1	FALSE
Cd14	0.168577	1	0.108748	1	0.00103155	1	-0.19469	1	0.0417803	1	0.647997	1	0.341701	1	0.211782	1	0.138835	1	0.334591	1	0.0250895	0.334981	1	1	FALSE
Cd151	-0.0181062	1	-0.0434657	1	0.516697	1	0.1935	1	0.00468721	1	0.146619	1	0.037017	1	0.0581115	1	-0.269475	1	-0.181281	1	0.130663	-0.0418018	1	1	FALSE
Cd164	0.249554	0.000444059	0.136329	1	-0.0130316	1	0.18694	1	0.382119	8.65233e-13	0.15576	1	0.305032	1	-0.154665	1	-0.0788867	1	0.0111785	1	0.188382	0.0476837	2.85323e-11	1	FALSE
Cd1d1	-0.0355852	0.0516127	-0.116204	0.000560961	-0.0439107	1	-0.0975146	1	-0.107976	6.55286e-22	-0.0759558	0.385898	-0.0526905	1	-0.0947726	1	-0.0676077	1	-0.126106	1	-0.080238	-0.0834265	1.04184e-20	0.997022	FALSE
Cd24a	-0.236224	0.000342242	-0.265838	1	-0.0386195	1	0.0884761	1	-0.338198	2.07647e-16	-0.348172	1	-0.0721981	1	0.144431	1	-0.279267	1	-0.617213	1	-0.158081	-0.234484	1.22776e-14	1	FALSE
Cd274	-0.12379	2.16132e-10	-0.129715	0.0520785	-0.129384	1	-0.0924671	1	-0.146324	7.42158e-21	-0.219789	1	-0.00533967	1	-0.107471	1	0.00384588	1	-0.00643195	1	-0.124336	-0.0670373	9.65953e-26	1	FALSE
Cd276	-0.0999178	0.0148491	-0.0535098	1	-0.0326319	1	-0.0418199	1	-0.0932269	9.56096e-05	-0.0475634	1	-0.178652	1	-0.123168	1	0.0190154	1	-0.0238283	1	-0.0642213	-0.0708393	0.00267147	1	FALSE
Cd2ap	0.045323	1	-0.0916389	1	-0.202246	1	0.0610285	1	0.0288106	1	-0.194182	1	0.0404216	1	0.000617131	1	0.164996	1	0.0241538	1	-0.0317446	0.00720129	1	1	FALSE
Cd2bp2	-0.024974	1	-0.0541365	1	0.0302174	1	0.0158222	1	0.0181527	1	-0.142625	1	0.0138119	1	0.00182143	1	0.00679628	1	0.122285	1	-0.00298363	0.000417844	1	1	FALSE
Cd320	-0.0414442	1	-0.0787705	1	-0.136749	1	0.00215648	1	-0.110751	9.82133e-05	-0.00891011	1	-0.0682332	1	-0.224714	1	-0.00581315	1	0.0125856	1	-0.0731115	-0.0590169	0.0477308	1	FALSE
Cd3eap	-0.0279868	1	0.0113348	1	0.0971492	1	-0.0827323	1	-0.0299369	1	0.00710562	1	0.0731802	1	0.101808	1	-0.13866	1	-0.102966	1	-0.00643442	-0.0119063	1	1	FALSE
Cd44	0.338423	0.00307433	0.176182	1	0.172205	1	-0.0108331	1	0.308566	8.40989e-09	0.107905	1	0.101845	1	-0.163959	1	-0.0798327	1	0.010984	1	0.196909	-0.00461147	4.51276e-07	1	FALSE
Cd47	0.290189	5.67532e-06	0.38401	4.21721e-05	0.478764	1	0.28524	1	0.249632	7.72217e-09	0.13451	1	0.25244	1	-0.109497	1	0.176177	1	-0.164888	1	0.337567	0.0577486	2.36661e-13	1	FALSE
Cd63	-0.0660315	1	-0.0648758	1	0.0221011	1	-0.0608535	1	0.0527487	1	0.248908	1	0.149112	1	0.331553	1	0.00168426	1	0.125876	1	-0.0233822	0.171427	1	1	FALSE
Cd68	0.051307	1	-0.0135556	1	0.0793409	1	-0.116495	1	0.0345346	1	-0.0428258	1	0.0177084	1	0.0647328	1	-0.0101191	1	0.0611571	1	0.00702645	0.0181307	1	1	FALSE
Cd74	-2.90365	4.06944e-76	-2.50732	2.99029e-31	-2.82729	3.25261e-07	-2.65671	2.6122e-05	-2.95451	1.55499e-119	-1.45137	1.03959e-19	-1.63747	1.47222e-16	-2.09987	0.00934967	-1.47806	0.533654	-1.2429	0.37742	-2.7699	-1.58194	5.86407e-227	7.02563e-32	TRUE
Cd81	-0.213921	0.139491	0.297009	1	0.393808	1	0.307883	1	-0.19595	0.000138402	-0.121847	1	0.0556286	1	0.170432	1	0.043287	1	-0.278793	1	0.117766	-0.0262585	0.0166509	1	FALSE
Cd82	0.219909	1	0.27487	1	0.286748	1	0.311131	1	0.62295	3.29972e-39	0.100716	1	0.024321	1	0.000928433	1	-0.190232	1	-0.124709	1	0.343122	-0.0377951	8.87079e-33	1	FALSE
Cd9	0.252092	1	0.555173	2.38727e-05	0.345602	1	0.414732	1	0.112081	1	0.406732	0.000825458	0.321792	1	0.349071	1	0.221558	1	0.0913872	1	0.335936	0.278108	0.0191881	0.1641	FALSE
Cd99l2	0.00527927	1	-0.037381	1	-0.0503431	1	0.0467902	1	-0.0390548	1	-0.013319	1	-0.00237588	1	-0.0121665	1	0.0667975	1	-0.0341502	1	-0.0149419	0.000957183	1	1	FALSE
Cda	-0.0367007	1	0.071437	1	-0.00111461	1	-0.0588354	1	-0.154133	5.88484e-08	0.0147853	1	0.00736388	1	0.171028	1	-0.0595676	1	-0.317273	1	-0.0358692	-0.0367325	0.000242818	1	FALSE
Cdadc1	-0.0237467	1	-0.00270179	1	-0.0135989	1	-0.0825684	1	-0.0378884	1	0.0434708	1	0.0184769	1	-0.0431762	1	0.0483522	1	0.0520126	1	-0.0321008	0.0238273	1	1	FALSE
Cdan1	0.00803421	1	-0.0182481	1	0.0338678	1	-0.0378152	1	-0.000335771	1	0.0235618	1	0.00717516	1	0.0170741	1	0.0148218	1	-0.0217154	1	-0.00289942	0.00818351	1	1	FALSE
Cdc123	-0.124426	0.00892106	0.0248561	1	-0.083699	1	-0.0825297	1	-0.0909485	0.434761	-0.0657209	1	0.145241	1	-0.0397556	1	0.106531	1	-0.0816697	1	-0.0713495	0.0129252	0.349427	1	FALSE
Cdc14a	-0.0646536	1	-0.101456	0.988367	-0.041379	1	-0.0342141	1	-0.0140838	1	0.012064	1	-0.0117095	1	-0.0728803	1	-0.0190876	1	-0.0230397	1	-0.0511574	-0.0229306	1	1	FALSE
Cdc14b	-0.0153746	1	-0.0683354	1	-0.0468666	1	0.000984524	1	-0.0505131	0.00147183	-0.0591026	1	-0.0457316	1	0.0654606	1	-0.0667735	1	0.0272068	1	-0.036021	-0.0157881	0.221306	1	FALSE
Cdc16	-0.0232058	1	-0.0676917	1	-0.0545178	1	-0.0465965	1	-0.0908151	0.0044067	-0.143924	1	-0.0587341	1	0.12278	1	-0.038493	1	-0.0425372	1	-0.0565654	-0.0321815	0.369382	1	FALSE
Cdc20	-0.0196669	1	-0.206872	1	0.119914	1	-0.238651	1	0.0797882	1	0.132485	1	-0.15139	1	-0.102687	1	-0.296	1	0.147762	1	-0.0530974	-0.0539659	1	1	FALSE
Cdc23	-0.0416384	1	-0.0605121	1	-0.0531025	1	0.0609979	1	-0.0252524	1	0.0113513	1	-0.0342383	1	0.0405682	1	0.0587367	1	0.0449599	1	-0.0239015	0.0242756	1	1	FALSE
Cdc25a	-0.0245192	1	-0.094626	1	-0.081236	1	0.0260708	1	-0.087817	1.71722e-05	-0.0174409	1	-0.0510677	1	-0.0609866	1	-0.0285427	1	-0.0230213	1	-0.0524255	-0.0362118	0.0153902	1	FALSE
Cdc25b	0.0274752	1	0.037903	1	0.0564053	1	-0.0171319	1	0.0731811	1	0.0720904	1	-0.0123832	1	-0.019422	1	0.0308511	1	0.0450228	1	0.0355665	0.0232318	1	1	FALSE
Cdc25c	-0.0413141	1	-0.0300538	1	0.0804188	1	-0.0261982	1	0.0133029	1	-0.0194202	1	-0.0202568	1	0.0265682	1	0.0460333	1	-0.0139079	1	-0.000768873	0.00380331	1	1	FALSE
Cdc26	-0.0775035	1	-0.0634359	1	-0.0426572	1	0.139219	1	-0.0613628	1	-0.0828292	1	-0.0433403	1	-0.0173436	1	0.150669	1	-0.0559626	1	-0.0211482	-0.00976137	1	1	FALSE
Cdc27	0.0534068	1	-0.114861	1	-0.0964405	1	-0.107288	1	-0.0166441	1	-0.0190649	1	0.00575517	1	0.0461536	1	-0.0116699	1	-0.0367944	1	-0.0563653	-0.0031241	1	1	FALSE
Cdc34	-0.119661	0.422867	-0.123055	1	-0.141555	1	-0.150711	1	0.0120201	1	0.0381061	1	-0.189841	1	0.0374386	1	-0.120925	1	-0.47621	1	-0.104592	-0.142286	0.998064	1	FALSE
Cdc37	-0.186978	2.55229e-05	-0.0999062	1	-0.176015	1	-0.0762601	1	-0.154704	2.81044e-09	-0.116364	1	-0.0945347	1	-0.185196	1	-0.336129	1	0.0510118	1	-0.138773	-0.136242	2.87441e-09	1	FALSE
Cdc37l1	0.0217706	1	-0.150987	1	-0.0742328	1	-0.008175	1	0.0119388	1	0.0244575	1	-0.0335754	1	-0.0879374	1	0.0970879	1	0.065519	1	-0.0399371	0.0131103	1	1	FALSE
Cdc40	-0.144815	0.102018	-0.0515178	1	-0.389865	0.642116	-0.13364	1	-0.117655	0.00171595	0.0507227	1	-0.0434238	1	-0.00144699	1	0.260245	1	0.0950019	1	-0.167499	0.0722199	0.0518937	1	FALSE
Cdc42	-0.246395	1.22778e-07	-0.144988	1	-0.0245877	1	-0.0781828	1	-0.291057	2.47901e-24	-0.16818	1	0.0241124	1	-0.0960667	1	-0.309843	1	-0.10112	1	-0.157042	-0.130219	3.27542e-25	1	FALSE
Cdc42bpa	0.145279	1	0.00991737	1	-0.145874	1	-0.0390523	1	0.0835769	1	0.0610004	1	0.00347054	1	-0.108858	1	0.0121704	1	0.00252369	1	0.0107693	-0.00593849	1	1	FALSE
Cdc42bpb	0.0152955	1	0.000806724	1	0.0456629	1	-0.013697	1	0.0140922	1	-0.00210898	1	0.0676802	1	-0.236074	1	-0.0122796	1	0.0615644	1	0.0124321	-0.0242436	1	1	FALSE
Cdc42bpg	-0.00539846	1	0.0686266	1	-0.0712697	1	-0.0229384	1	0.0186723	1	0.0290578	1	0.0190366	1	-0.0214865	1	0.0274696	1	-0.0157198	1	-0.00246153	0.00767154	1	1	FALSE
Cdc42ep1	-0.0451416	1	0.0312349	1	-0.074689	1	0.0793881	1	-0.0105665	1	-0.112798	1	-0.25919	1	-0.0299405	1	0.0359652	1	-0.0825882	1	-0.00395481	-0.0897104	1	1	FALSE
Cdc42ep3	0.164514	0.528623	0.10604	1	0.0938223	1	0.202416	1	0.0957512	0.013874	0.0677673	1	0.0311705	1	-0.00888873	1	-0.0527545	1	0.0533571	1	0.132509	0.0181303	0.455493	1	FALSE
Cdc42ep4	0.00246089	1	0.0194356	1	0.0299837	1	-0.0294663	1	-0.0277063	1	0.0926815	1	-0.161941	1	-0.0389962	1	0.0767581	1	-0.0576161	1	-0.00105848	-0.0178228	1	1	FALSE
Cdc42ep5	-0.329456	3.02352e-36	-0.185677	1.6683e-05	-0.388712	0.115106	-0.33364	1	-0.290665	2.53799e-68	-0.21251	0.000147318	-0.193064	0.465807	-0.244014	1	-0.0739072	1	-0.162597	1	-0.30563	-0.177218	2.4604e-101	0.0381099	FALSE
Cdc42se1	-0.0840362	1	-0.0798126	1	-0.276286	1	-0.0474177	1	-0.133324	1.62587e-05	-0.0676481	1	0.0208657	1	-0.328457	1	-0.0560959	1	-0.175565	1	-0.124175	-0.12138	0.014833	1	FALSE
Cdc42se2	-0.0191909	1	-0.0458941	1	-0.120374	1	-0.118403	1	-0.088673	0.000902534	0.0178121	1	0.0149788	1	0.0158286	1	-0.0829777	1	-0.0801717	1	-0.078507	-0.022906	0.172054	1	FALSE
Cdc45	-0.0811497	0.0023411	-0.0516301	1	-0.027992	1	-0.103027	1	-0.0727446	0.716559	-0.00061611	1	-0.0179684	1	0.0162104	1	-0.107816	1	-0.0725186	1	-0.0673088	-0.0365417	0.236184	1	FALSE
Cdc5l	0.00590469	1	-0.135704	1	-0.114849	1	0.0227855	1	-0.0240699	1	-0.104304	1	-0.0891238	1	-0.263163	1	0.0703741	1	-0.116405	1	-0.0491865	-0.100524	1	1	FALSE
Cdc6	-0.0277416	1	-0.0500861	1	-0.0453969	1	0.00373206	1	0.0185763	1	-0.00708408	1	0.00711121	1	-0.0334008	1	-0.0260089	1	-0.0154968	1	-0.0201832	-0.0149759	1	1	FALSE
Cdc7	0.00360658	1	-0.0125626	1	0.01123	1	0.0140033	1	0.010193	1	-0.00246744	1	-0.0233316	1	0.0200769	1	-0.0361915	1	0.00527756	1	0.00529406	-0.00732722	1	1	FALSE
Cdc73	0.0384028	1	-0.12503	1	-0.00911727	1	0.158233	1	0.0233977	1	-0.0529016	1	0.059102	1	0.0554539	1	0.0923164	1	0.0188698	1	0.0171772	0.0345681	1	1	FALSE
Cdca2	-0.0515114	1	0.00209655	1	-0.0721858	1	-0.0171333	1	0.0233292	1	0.0231634	1	-0.0381852	1	-0.00908343	1	0.012598	1	0.0370766	1	-0.023081	0.00511387	1	1	FALSE
Cdca3	-0.0568844	1	-0.0623805	1	-0.090534	1	-0.0341796	1	0.0688441	1	-0.0947644	1	-0.0857882	1	0.000599222	1	-0.0897089	1	0.182025	1	-0.0350269	-0.0175275	1	1	FALSE
Cdca4	-0.0773701	1	-0.00682376	1	0.00988567	1	0.0659435	1	-0.0341834	1	-0.163973	1	-0.022118	1	-0.202809	1	-0.123808	1	-0.0141035	1	-0.00850961	-0.105362	1	1	FALSE
Cdca5	-0.0128673	1	-0.0391513	1	0.00603391	1	0.0490484	1	0.0249671	1	-0.0491683	1	-0.0135915	1	-0.0262632	1	-0.00617967	1	0.0585559	1	0.00560614	-0.00732936	1	1	FALSE
Cdca7	-0.00846451	1	-0.132431	1	-0.0545461	1	-0.0256839	1	-0.0319205	1	-0.037995	1	-0.0281879	1	-0.137785	1	-0.136624	1	-0.0889699	1	-0.0506091	-0.0859124	1	1	FALSE
Cdca7l	-0.0261209	1	-0.0243092	1	-0.0505969	1	-0.0434728	1	-0.0742841	0.0381228	-0.121562	1	0.0779047	1	-0.0253166	1	0.106189	1	-0.140541	1	-0.0437568	-0.0206653	0.768594	1	FALSE
Cdca8	-0.0597912	1	-0.181924	1	0.0382762	1	-0.101234	1	0.0504974	1	-0.202085	1	-0.276777	1	-0.189085	1	0.0547103	1	0.262719	1	-0.050835	-0.0701035	1	1	FALSE
Cdcp1	-0.0296089	1	-0.144004	1	-0.0869193	1	0.0182882	1	-0.0722789	1	-0.0417131	1	-0.0229606	1	-0.0639424	1	0.063928	1	-0.050504	1	-0.0629046	-0.0230384	1	1	FALSE
Cdh1	0.0933221	1	-0.0819014	1	0.18941	1	0.00185714	1	0.380692	5.28245e-19	-0.188024	1	-0.201433	1	0.281562	1	0.0148112	1	-0.0445631	1	0.116676	-0.0275293	7.60963e-14	1	FALSE
Cdip1	0.00231086	1	0.0118845	0.21591	-0.0548384	1	-0.0448617	1	-0.0441264	1	0.00979886	1	0.0232171	1	-0.0485825	1	-0.00401673	1	0.0673619	1	-0.0259262	0.00955573	0.979833	1	FALSE
Cdipt	-0.0322099	1	0.0354321	1	0.0579766	1	-0.0875238	1	-0.020404	1	0.0407775	1	-0.0216249	1	-0.0874813	1	0.00143984	1	-0.0112352	1	-0.0093458	-0.0156248	1	1	FALSE
Cdk1	-0.143469	1	0.0256286	1	-0.124732	1	0.180198	1	0.151507	1	-0.0984484	1	-0.159343	1	-0.606809	1	0.102474	1	0.0213754	1	0.0178264	-0.14815	1	1	FALSE
Cdk10	0.0216941	1	-0.0354386	1	0.144857	1	0.0253088	1	-0.00892927	1	0.03443	1	-0.100948	1	0.0597712	1	0.0700904	1	0.0179382	1	0.0294985	0.0162563	1	1	FALSE
Cdk11b	-0.0712557	1	-0.203088	1	-0.236656	1	-0.260918	1	-0.0487724	1	-0.0810156	1	-0.0958901	1	-0.210722	1	-0.0942323	1	-0.0160804	1	-0.164138	-0.099588	1	1	FALSE
Cdk12	-0.0580977	1	-0.152502	1	-0.256357	1	-0.249294	1	-0.0740985	1	-0.109327	1	-0.17571	1	-0.152527	1	0.0467737	1	-0.0362429	1	-0.15807	-0.0854066	1	1	FALSE
Cdk13	-0.115669	1	-0.129684	1	-0.172124	1	-0.10959	1	-0.0136785	1	0.00178485	1	-0.0150367	1	-0.0942433	1	0.0505929	1	-0.0311277	1	-0.108149	-0.017606	1	1	FALSE
Cdk14	-0.0390897	1	-0.0528446	1	-0.165693	1	-0.266502	1	-0.160083	7.65678e-10	0.0412004	1	-0.0813008	1	-0.0906174	1	0.0647965	1	-0.0474451	1	-0.136842	-0.0226733	7.55877e-06	1	FALSE
Cdk16	0.0452525	1	-0.0447128	1	0.0263615	1	-0.0154272	1	-0.0448711	0.699081	-0.144609	1	-0.108234	1	-0.0205585	1	0.134293	1	-0.0157611	1	-0.0066794	-0.0309738	0.999964	1	FALSE
Cdk17	-0.0504048	1	-0.0144532	1	-0.175436	1	-0.244622	1	0.0407525	1	-0.12875	1	-0.0693747	1	0.023712	1	-0.0815167	1	-0.0372178	1	-0.0888326	-0.0586293	1	1	FALSE
Cdk18	-0.0558886	2.44396e-05	0.0426182	1	-0.0993856	1	-0.06752	1	-0.0825416	6.0718e-22	-0.0316217	0.00810358	-0.0565027	1	0.000629216	1	-0.0617364	1	-0.164579	1	-0.0525435	-0.0627621	8.28248e-21	0.47345	FALSE
Cdk19	0.00576303	1	0.0301184	1	-0.047052	1	0.0910168	1	0.0152031	1	-0.116324	1	-0.029037	1	0.0101805	1	-0.0132621	1	-0.107302	1	0.0190099	-0.051149	1	1	FALSE
Cdk2	-0.0400106	1	-0.0546172	1	0.0436069	1	-0.0264476	1	-0.0684991	0.000144015	-0.0177118	1	-0.0592063	1	0.0502883	1	-0.0250434	1	0.0049579	1	-0.0291935	-0.00934306	0.0604017	1	FALSE
Cdk20	-0.0187256	1	0.00451685	1	0.0345866	1	0.0130423	1	-0.0212591	1	0.00991914	1	0.0115593	1	-0.026839	1	-0.111884	1	0.0113096	1	0.0024322	-0.021187	1	1	FALSE
Cdk2ap1	-0.0886142	1	-0.0617089	1	-0.0577673	1	-0.0927485	1	-0.107275	1.01078e-08	-0.355405	1.10206e-08	-0.374484	1.2242e-05	-0.275288	1	-0.363088	1	-0.320381	0.0133185	-0.0816227	-0.337729	6.07993e-05	1.12315e-10	FALSE
Cdk2ap2	0.133027	1	0.0267403	1	0.180253	1	0.0452917	1	0.167492	0.0068427	0.223482	0.0102623	0.221126	1	0.041776	1	-0.19973	1	0.420949	1	0.110561	0.141521	0.443204	0.517125	FALSE
Cdk4	-0.183737	0.00963761	-0.104263	1	-0.0983319	1	-0.0592527	1	-0.180673	4.5235e-06	0.0268714	1	-0.249369	1	0.135097	1	-0.160188	1	0.0408432	1	-0.125252	-0.0413492	0.000192295	1	FALSE
Cdk5	-0.0262369	1	-0.0169682	1	0.0696443	1	0.00698811	1	-0.0192023	1	-0.00371707	1	0.0408588	1	0.0188316	1	-0.00942845	1	0.0150751	1	0.00284499	0.012324	1	1	FALSE
Cdk5r1	0.0166794	1	-0.010134	1	-0.0217578	1	0.074931	0.03075	-0.0247355	1	0.00394165	1	0.00202463	1	0.00911283	1	0.00972061	1	-0.0284851	1	0.00699662	-0.000737075	0.728865	1	FALSE
Cdk5rap2	-0.000633093	1	-0.0555456	1	0.0588957	1	-0.0418947	1	0.0162954	1	-0.00825984	1	0.0120546	1	-0.0788523	1	0.107828	1	0.0301853	1	-0.00457646	0.0125912	1	1	FALSE
Cdk5rap3	0.0237336	1	-0.030446	1	0.0346257	1	0.0312268	1	-0.0453643	1	-0.149532	1	0.00466638	1	0.0543834	1	0.224138	1	-0.168464	1	0.00275513	-0.00696167	1	1	FALSE
Cdk6	0.0465247	1	-0.0147531	1	-0.144054	1	-0.191625	1	0.162116	0.0154164	-0.00512587	1	-0.122205	1	-0.0606557	1	-0.0347991	1	-0.104595	1	-0.0283583	-0.0654761	0.595212	1	FALSE
Cdk7	-0.0314634	1	-0.0426891	1	0.0427753	1	-0.129156	1	-0.0441311	1	-0.00377562	1	0.0101116	1	-0.175163	1	-0.00722974	1	-0.0245784	1	-0.040933	-0.040127	1	1	FALSE
Cdk8	-0.0437826	1	-0.12755	1	-0.117404	1	0.0115242	1	-0.0437863	1	-0.0107465	1	-0.026334	1	-0.113368	1	-0.0658594	1	-0.106036	1	-0.0641997	-0.0644688	1	1	FALSE
Cdk9	-0.00359905	1	-0.104885	1	-0.0414581	1	-0.0867662	1	-0.0758884	0.971203	0.0694061	1	-0.119048	1	-0.153439	1	-0.0510385	1	0.0458172	1	-0.0625193	-0.0416604	1	1	FALSE
Cdkal1	-0.00681598	1	-0.0589622	1	0.0393301	1	-0.0967787	1	-0.0218336	0.688136	0.00174133	1	-0.0233173	1	0.0609821	1	0.0970475	1	-0.0499372	1	-0.0290121	0.0173033	0.999955	1	FALSE
Cdkl2	0.071312	1	-0.135508	1	-0.076379	1	0.0206445	1	-0.0294466	1	0.0417937	1	0.0422827	1	0.0489962	1	0.0389045	1	0.049565	1	-0.0298754	0.0443084	1	1	FALSE
Cdkl3	0.00802245	1	-0.0425536	1	-0.000244327	1	0.143923	1	-0.0140246	1	0.0359719	1	0.00488444	1	-0.00936818	1	-0.0679784	1	0.0294934	1	0.0190245	-0.00139938	1	1	FALSE
Cdkn1a	0.276142	1	0.157475	1	0.214227	1	0.517805	1	0.40328	0.000301289	0.388338	0.00253495	0.427059	1	0.285332	1	0.0199258	1	0.365572	1	0.313786	0.297245	0.0936442	0.288068	FALSE
Cdkn1b	-0.0889002	1	-0.150447	1	-0.244746	1	-0.11992	1	-0.0865026	1	0.167932	1	0.0903267	1	-0.100995	1	0.201727	1	-0.21105	1	-0.138103	0.0295883	1	1	FALSE
Cdkn2aip	0.105477	1	-0.0441464	1	0.0551146	1	0.0647634	1	-0.00363577	1	0.027392	1	-0.0464123	1	-0.092632	1	0.142423	1	-0.0178019	1	0.0355146	0.00259376	1	1	FALSE
Cdkn2aipnl	-0.163039	0.00237084	0.011552	1	-0.200761	1	0.0673719	1	-0.0673136	1	-0.0780499	1	0.0771921	1	0.220211	1	-0.0584512	1	0.0205586	1	-0.0704381	0.0362921	0.279143	1	FALSE
Cdkn2c	-0.210663	1	-0.065472	1	-0.430049	1	0.0362566	1	-0.199281	1	-0.146236	1	-0.103753	1	-0.198619	1	-0.374248	1	-0.173997	1	-0.173842	-0.199371	1	1	FALSE
Cdkn2d	0.0732693	1	0.114173	1	0.402268	1	0.138093	1	0.218121	0.000121293	0.132038	1	0.0390069	1	0.078244	1	-0.0405257	1	0.204839	1	0.189185	0.0827205	0.0543826	1	FALSE
Cdkn3	0.0563296	1	-0.0388523	1	0.0750028	1	-0.0625722	1	0.127622	1	0.126432	1	0.0912234	1	-0.0248578	1	-0.119737	1	0.318548	1	0.0315059	0.0783218	1	1	FALSE
Cdon	-0.0161592	1	0.000638152	1	0.0436739	1	0.0379761	1	-0.0550533	0.00855608	0.0166045	1	-0.0220241	1	-0.000291074	1	0.076069	1	0.0744148	1	0.00221513	0.0289546	0.48336	1	FALSE
Cdpf1	0.0365	1	0.0201694	1	0.0299393	1	0.0428319	1	0.0308747	1	0.0525022	1	0.0379888	1	0.0593126	1	-0.012168	1	0.0133638	1	0.0320631	0.0301999	1	1	FALSE
Cdr2	-0.0448687	1	-0.0502951	1	-0.0448209	1	-0.0486264	1	-0.0541972	0.0304761	-0.0119985	1	-0.0223169	1	-0.07079	1	0.00477569	1	-0.00918889	1	-0.0485616	-0.0219037	0.727178	1	FALSE
Cdr2l	0.0245727	1	-0.0213042	1	-0.0148141	1	-0.00530571	1	0.00039921	1	0.0180338	1	0.00138333	1	0.000210326	1	-0.00358134	1	0.0126636	1	-0.00329041	0.00574193	1	1	FALSE
Cds2	0.0666317	1	-0.00918796	1	-0.0029136	1	-0.0357098	1	0.0407484	1	0.0995459	1	-0.166679	1	0.012898	1	-0.0587255	1	-0.0855054	1	0.0119137	-0.0396932	1	1	FALSE
Cdt1	-0.0137556	1	-0.16641	0.988514	-0.0360121	1	-0.0384438	1	0.0224775	1	-0.0423125	1	-0.156198	1	-0.145234	1	-0.0788368	1	0.0672959	1	-0.0464287	-0.0710571	1	1	FALSE
Cdv3	-0.186701	0.00390578	-0.139466	1	-0.328922	1	-0.108662	1	-0.187892	0.000240848	-0.14112	1	5.36169e-05	1	-0.536038	1	0.108461	1	-0.124489	1	-0.190329	-0.138627	0.00197688	1	FALSE
Cdyl	-0.0409566	1	-0.0349117	1	0.0698105	1	-0.0551954	1	-0.0296097	1	-0.130127	1	-0.017296	1	-0.101215	1	0.0664648	1	-0.0825009	1	-0.0181726	-0.0529349	1	1	FALSE
Cebpb	-0.0647164	1	0.25185	1	-0.562749	1	0.166375	1	-0.295653	1	0.495442	1	0.184349	1	0.373247	1	-0.0808617	1	-0.22172	1	-0.100979	0.150091	1	1	FALSE
Cebpd	0.195425	1	0.0231027	1	0.158402	1	0.220561	1	0.13431	0.00367156	-0.0120201	1	0.0784632	1	0.324804	1	0.250959	1	0.0240655	1	0.14636	0.133254	0.341069	1	FALSE
Cebpg	-0.00280434	1	-0.133045	1	-0.0376445	1	-0.123311	1	-0.0571544	1	0.00630119	1	-0.0044023	1	-0.320847	1	-0.00226931	1	0.0371081	1	-0.0707918	-0.0568218	1	1	FALSE
Cebpz	0.0283063	1	-0.171026	1	-0.208635	1	-0.151341	1	0.0521135	1	0.0360426	1	0.0131436	1	-0.241204	1	0.0400233	1	0.0488853	1	-0.0901165	-0.0206218	1	1	FALSE
Cebpzos	0.0954589	1	0.0739149	1	0.143258	1	0.216363	1	0.0771614	1	0.0657676	1	0.133565	1	0.00924791	1	0.119434	1	0.206992	1	0.121231	0.107001	1	1	FALSE
Celf1	0.00643924	1	-0.0455259	1	-0.180538	1	0.0726358	1	0.0179484	1	-0.0252491	1	-0.0916839	1	-0.15222	1	-0.0308784	1	-0.0689414	1	-0.025808	-0.0737946	1	1	FALSE
Celf2	0.0781478	1	0.00416635	1	0.0257152	1	-0.0125355	1	-0.00100466	1	0.105378	1	0.166485	0.185764	0.103404	1	0.199117	1	0.103904	1	0.0188978	0.135658	1	0.971436	FALSE
Celf4	-0.0750436	1	-0.133729	1	-0.203379	1	-0.162608	1	-0.112876	0.0114969	-0.0350936	1	-0.211248	1	-0.224734	1	-0.278814	1	-0.228779	1	-0.137527	-0.195734	0.53863	1	FALSE
Cenpa	-0.190343	1	-0.129218	1	0.40668	1	-0.0140374	1	0.144	1	0.126277	1	-0.364386	1	-0.3882	1	-0.0700475	1	0.516273	1	0.0434163	-0.0360168	1	1	FALSE
Cenpb	0.0715031	1	0.142197	1	0.223736	1	0.418861	1	0.0612203	1	0.0858421	1	0.16663	1	0.0216524	1	-0.0895912	1	0.110539	1	0.183504	0.0590146	1	1	FALSE
Cenpc1	0.0428275	1	-0.065411	1	0.0217711	1	-0.117688	1	-0.0241026	1	-0.00281952	1	-0.048471	1	0.3179	1	-0.00397933	1	0.0764171	1	-0.0285206	0.0678095	1	1	FALSE
Cenpe	-0.0592775	1	-0.0680973	1	0.0492597	1	-0.31156	1	-0.00448199	1	0.159497	1	0.0323835	1	-0.100509	1	0.0174438	1	0.347399	1	-0.0788314	0.091243	1	1	FALSE
Cenpf	0.22779	1	-0.0935105	1	0.279622	1	-0.116559	1	0.22445	1	0.251559	1	0.0297646	1	-0.049116	1	0.119636	1	0.18843	1	0.104359	0.108055	1	1	FALSE
Cenph	0.0494405	1	-0.0969844	1	-0.0537849	1	0.0808116	1	0.020913	1	-0.110691	1	-0.117923	1	-0.0631761	1	-0.0628663	1	0.0151414	1	7.91468e-05	-0.067903	1	1	FALSE
Cenpi	-0.00617491	1	-0.000157325	1	-0.0364756	1	0.00526608	1	0.0126927	1	-0.0341026	1	0.00576467	1	-0.0273918	1	0.0241757	1	-0.00764675	1	-0.00496981	-0.00784016	1	1	FALSE
Cenpj	-0.0248452	1	0.011006	1	-0.045062	1	0.11161	1	-0.0255085	1	0.0151038	1	-0.140631	1	-0.0145417	1	0.0135197	1	0.0382349	1	0.0054401	-0.0176628	1	1	FALSE
Cenpk	-0.0346077	1	-0.0549537	1	0.00344926	1	-0.00888635	1	0.00227545	1	0.012661	1	0.0402728	1	-0.076556	1	-0.0180726	1	0.046187	1	-0.0185446	0.000898422	1	1	FALSE
Cenpl	0.0100598	1	0.0064597	1	-0.0367794	1	0.0179081	1	0.0197701	1	0.00824718	1	0.0240358	1	-0.0141088	1	0.088646	1	0.107654	1	0.00348366	0.0428948	1	1	FALSE
Cenpm	-0.0518132	1	-0.0407242	1	0.0248826	1	0.0558789	1	0.0461647	1	-0.00528583	1	0.0108005	1	0.0616362	1	0.036201	1	0.0550354	1	0.00687774	0.0316775	1	1	FALSE
Cenpn	0.0274557	1	-0.0418971	1	-0.00299109	1	0.178382	1	0.0383158	1	-0.0128698	1	0.00974653	1	-0.0520469	1	-0.0119481	1	0.0882563	1	0.0398531	0.00422759	1	1	FALSE
Cenpo	0.000877363	1	0.00503769	1	-0.0512311	1	0.0771544	1	-0.00248543	1	-0.00163261	1	-0.00354984	1	-0.0209155	1	0.0459018	1	-0.00812508	1	0.00587059	0.00233575	1	1	FALSE
Cenpp	0.0226026	1	0.00530845	1	-0.0170643	1	0.0189197	1	0.0362616	1	0.0446381	1	0.0976237	1	0.0357687	1	0.0885413	1	0.103867	1	0.0132056	0.0740877	1	1	FALSE
Cenpq	-0.0225742	1	-0.0924903	1	-0.119587	1	0.0757769	1	0.00668452	1	-0.0799847	1	-0.137898	1	-0.0763809	1	-0.044233	1	0.0359683	1	-0.0304379	-0.0605056	1	1	FALSE
Cenps	-0.0479904	1	-0.074869	1	-0.0262858	1	0.131137	1	-0.00734545	1	-0.104564	1	0.0297327	1	-0.0486349	1	0.00110135	1	0.0379422	1	-0.0050707	-0.0168846	1	1	FALSE
Cenpt	-0.0420922	1	0.00932388	1	0.00193874	1	0.0093493	1	-0.0251713	1	0.000837609	1	0.00311718	1	-0.210407	1	-0.0810643	1	0.0706357	1	-0.00933033	-0.0433761	1	1	FALSE
Cenpu	-0.0236596	1	-0.0317933	1	-0.0674234	1	0.0257313	1	0.0302374	1	-0.0309179	1	-0.00221274	1	-0.0353702	1	-0.0176286	1	-0.172434	1	-0.0133815	-0.0517127	1	1	FALSE
Cenpv	-0.276523	2.50563e-07	-0.205339	1	-0.490227	1	-0.0466248	1	-0.167614	1.58009e-06	-0.0825135	1	-0.166095	1	-0.250607	1	-0.17084	1	-0.252864	1	-0.237265	-0.184584	1.26816e-08	1	FALSE
Cenpw	-0.151553	0.483197	-0.260234	1	-0.0336698	1	-0.0760447	1	-0.0606765	1	-0.126075	1	-0.484166	1	-0.138815	1	-0.267165	1	0.0101837	1	-0.116436	-0.201207	0.99907	1	FALSE
Cenpx	0.105411	1	0.0549668	1	0.0274634	1	0.179215	1	0.189422	3.88137e-05	0.104359	0.0317586	0.136826	1	0.0344335	1	0.137555	1	0.141399	1	0.111296	0.110914	0.0264234	0.734927	FALSE
Cep104	0.0683447	1	-0.00507733	1	-0.0110944	1	-0.0856453	1	0.00791305	1	-0.0135297	1	-0.0116874	1	-0.0270807	1	0.0601148	1	0.0249067	1	-0.00511185	0.00654473	1	1	FALSE
Cep112	0.0171208	1	-0.00488328	1	0.0343867	1	0.0352901	1	-0.0198768	1	0.0637346	1	0.0691134	1	0.0745843	1	0.071415	1	0.00910988	1	0.0124075	0.0575914	1	1	FALSE
Cep120	-0.00581694	1	0.0149354	1	0.0959142	1	0.0303934	1	-0.00728507	1	0.00478405	1	-0.000908886	1	0.00871692	1	0.0279395	1	-0.0425762	1	0.0256282	-0.000408914	1	1	FALSE
Cep126	0.0419327	1	0.0339127	1	-0.059082	1	0.024763	1	0.0340838	1	0.0412095	1	0.022725	1	-0.00887654	1	0.0567231	1	0.032154	1	0.015122	0.028787	1	1	FALSE
Cep131	0.0304874	1	0.0246755	1	0.00384935	1	0.00833252	1	-0.0128861	1	0.0428051	1	-0.0298948	1	-0.0130661	1	0.0101474	1	-0.00258467	1	0.0108918	0.00148141	1	1	FALSE
Cep135	-0.036823	1	-0.0263719	1	0.00746849	1	-0.0212154	1	0.0227739	1	-0.00971928	1	-0.0348691	1	-0.0185348	1	-0.116709	1	-0.0298232	1	-0.0108336	-0.0419311	1	1	FALSE
Cep152	5.98879e-05	1	-0.00801471	1	-0.026259	1	-0.0176047	1	-0.00919106	1	-0.00323796	1	0.00251732	1	-0.00931999	1	-0.000584555	1	-0.012733	1	-0.0122019	-0.00467165	1	1	FALSE
Cep162	0.0642592	1	-0.105092	1	0.0870419	1	0.0013706	1	0.0169176	1	-0.000316365	1	-0.0474741	1	-0.0327333	1	-0.117105	1	0.0286569	1	0.0128995	-0.0337943	1	1	FALSE
Cep164	-0.0445728	1	0.00709749	1	-0.136866	1	0.0200736	1	-0.043321	1	0.0169017	1	-0.118116	1	0.0937946	1	0.116845	1	-0.24058	1	-0.0395177	-0.026231	1	1	FALSE
Cep170	-0.0362354	1	-0.0755025	1	-0.322071	1	-0.150777	1	-0.264993	3.04933e-14	0.0247439	1	0.0229441	1	-0.0295957	1	0.0154976	1	-0.31873	1	-0.169916	-0.057028	1.36079e-09	1	FALSE
Cep170b	0.0414329	1	-0.0262334	1	0.0537605	1	-0.0746105	1	0.0316876	1	0.00724446	1	-0.0151604	1	-0.0230027	1	0.128109	1	-0.0319788	1	0.00520744	0.0130422	1	1	FALSE
Cep19	0.0162764	1	-0.0812232	0.807976	0.0766861	1	-0.0144852	1	0.0206844	1	0.0600716	1	0.0388299	1	-0.00929618	1	0.087036	1	-0.101901	1	0.00358771	0.014948	0.999997	1	FALSE
Cep192	-0.0288154	1	-0.00949617	1	-0.033748	1	-0.0234067	1	0.000954137	1	0.0346779	1	0.0279986	1	0.0658509	1	-0.0530345	1	-0.0686346	1	-0.0189024	0.00137168	1	1	FALSE
Cep250	0.0885871	1	-0.0193407	1	-0.172276	1	-0.0299783	1	0.00683245	1	0.0392996	1	-0.036956	1	-0.00976015	1	-0.0386563	1	0.124397	1	-0.025235	0.0156648	1	1	FALSE
Cep290	-0.0584845	1	-0.0661834	1	-0.147113	1	0.0544119	1	-0.103931	0.186421	-0.0149481	1	-0.0763874	1	0.073888	1	-0.104062	1	0.0233041	1	-0.0642601	-0.019641	0.971655	1	FALSE
Cep295	-0.000929517	1	0.00727564	1	0.0448682	1	0.107754	1	0.0547264	1	0.0261183	1	-0.166273	1	-0.111893	1	0.010675	1	-0.150354	1	0.0427389	-0.0783454	1	1	FALSE
Cep350	0.0689242	1	0.0183162	1	-0.0182924	1	0.0612001	1	0.0046778	1	-0.0944901	1	0.0326468	1	0.087682	1	0.0242718	1	0.248423	1	0.0269652	0.0597067	1	1	FALSE
Cep41	-0.00548981	1	-9.25103e-05	1	-0.00560854	1	0.0122488	1	0.00929779	1	-0.0400929	1	-0.0344993	1	-0.0373998	1	0.0673068	1	0.0323099	1	0.00207114	-0.00247507	1	1	FALSE
Cep44	-0.0479853	1	-0.0473441	1	-0.176262	1	-0.04099	1	-0.040581	1	0.00989123	1	-0.0415745	1	-0.0792508	1	0.098582	1	0.00692958	1	-0.0706325	-0.00108451	1	1	FALSE
Cep55	-0.00930565	1	-0.107375	1	-0.00428909	1	-0.0508203	1	0.0584272	1	-0.0379205	1	-0.272211	1	-0.00896223	1	0.0396744	1	0.127548	1	-0.0226726	-0.0303745	1	1	FALSE
Cep57	0.0226776	1	0.0373866	1	-0.0745094	1	-0.0466603	1	-0.012381	1	0.0501327	1	0.0245752	1	-0.115752	1	0.0910726	1	0.131279	1	-0.0146973	0.0362615	1	1	FALSE
Cep57l1	0.00448485	1	0.00563041	1	0.0375299	1	-0.0136616	1	-0.0187718	1	-0.0112331	1	-0.0361336	1	0.00150756	1	0.0198464	1	-0.00608872	1	0.00304235	-0.0064203	1	1	FALSE
Cep63	0.0146128	1	0.0562508	1	-0.123957	1	-0.0274283	1	-0.0124773	1	-0.0618655	1	-0.120215	1	0.076064	1	0.0136044	1	0.0474051	1	-0.0185997	-0.00900149	1	1	FALSE
Cep68	0.00484012	1	-0.0275044	1	-0.00271664	1	0.00206348	1	-0.0210872	1	0.0107791	1	-0.0227514	1	-0.0417065	1	0.132085	1	-0.00928554	1	-0.00888092	0.0138241	1	1	FALSE
Cep70	-0.0344241	0.00352146	-0.0161078	1	-0.189618	1	-0.084789	1	-0.0538599	1	-0.214576	1	0.0465423	1	-0.0205113	1	0.0456379	1	0.0793774	1	-0.0757598	-0.012706	0.334795	1	FALSE
Cep78	-0.0161726	1	-0.0259079	1	-0.0235127	1	0.0114949	1	-0.0198208	0.695362	-0.00757295	1	-0.0313112	1	0.00792989	1	0.0374048	1	-0.121391	1	-0.0147838	-0.0229881	0.999961	1	FALSE
Cep83	-0.0394854	1	-0.245823	0.00408869	-0.175814	1	-0.0732682	1	-0.0183702	1	-0.187094	1	0.0423759	1	0.0176377	1	-0.00680403	1	0.048533	1	-0.110552	-0.0170703	0.357591	1	FALSE
Cep85	-0.00106134	1	0.00807604	1	-0.00141466	1	0.0186119	1	0.0157531	1	0.0264214	1	0.0238298	1	0.00238581	1	0.0134635	1	-0.000732093	1	0.00799301	0.0130737	1	1	FALSE
Cep85l	0.00591409	1	-0.00307656	1	-0.0619662	1	-0.019143	1	-0.0322172	1	0.04418	1	-0.00786907	1	0.0346524	1	0.0506384	1	0.00681737	1	-0.0220978	0.0256838	1	1	FALSE
Cep89	0.00437356	1	-0.0872274	1	0.0924447	1	-0.149765	1	-0.000648307	1	0.0397688	1	-0.0122102	1	0.0461368	1	-0.0237706	1	0.123	1	-0.0281645	0.0345849	1	1	FALSE
Cep95	0.0161462	1	-0.0165413	1	-0.0658426	1	0.00718168	1	-0.013932	1	-0.0190581	1	0.00472103	1	-0.0168731	1	-0.018236	1	-0.0182379	1	-0.0145976	-0.0135368	1	1	FALSE
Cept1	-0.054147	1	-0.0967754	1	-0.144168	1	-0.0251985	1	-0.0671269	0.292394	-0.104982	1	0.0289971	1	-0.150652	1	-0.0817408	1	-0.123424	1	-0.0774832	-0.0863603	0.991456	1	FALSE
Cers2	0.0373192	1	0.134784	1	0.0961639	1	0.0688114	1	0.0433268	1	0.106633	1	0.101946	1	-0.0625766	1	-0.0996146	1	0.126773	1	0.076081	0.0346321	1	1	FALSE
Cers5	-0.049392	1	0.0351422	1	-0.086824	1	0.0888396	1	-0.0506409	1	0.0188762	1	-0.0881911	1	0.0500604	1	-0.0292532	1	0.0556939	1	-0.012575	0.00143723	1	1	FALSE
Cers6	-0.00243907	1	-0.0281096	1	-0.0116261	1	-0.085726	1	-0.0139348	1	-0.00979256	1	-0.0213947	1	0.0229612	1	-0.00305785	1	-0.019392	1	-0.0283671	-0.00613519	1	1	FALSE
Cetn2	0.0259958	1	-0.0108382	1	0.0480923	1	0.0063321	1	0.00470933	1	-0.021855	1	-0.111296	1	0.00276268	1	0.0440459	1	-0.167395	1	0.0148583	-0.0507474	1	1	FALSE
Cetn3	-0.00749955	1	-0.02137	1	0.0272943	1	-0.310058	1	-0.0337025	1	0.0430476	1	-0.0907039	1	0.0724451	1	0.0595817	1	0.175881	1	-0.0690672	0.0520503	1	1	FALSE
Cetn4	-0.00616202	1	0.0392561	1	0.0309196	1	-0.066996	1	-0.0551635	0.249826	0.00548675	1	-0.000400616	1	-0.0431194	1	-0.133652	1	0.0322482	1	-0.0116292	-0.0278875	0.986254	1	FALSE
Cfap20	-0.0171618	1	-0.156375	1	-0.0610614	1	-0.121109	1	-0.133332	1.8662e-05	-0.0233946	1	0.0434798	1	-0.297337	1	0.0151737	1	-0.147371	1	-0.0978078	-0.0818898	0.0162762	1	FALSE
Cfap36	0.0354611	1	-0.0545428	1	0.0459972	1	0.0973704	1	0.126065	0.303559	0.123508	1	0.119729	1	0.0645988	1	-0.0864828	1	0.240231	1	0.0500702	0.0923168	0.992456	1	FALSE
Cfap43	-0.121227	9.86356e-05	-0.061573	1	-0.318464	0.27221	-0.168407	1	-0.14994	4.4559e-14	-0.269815	0.318583	-0.175447	1	-0.188097	1	-0.154099	1	-0.0454904	1	-0.163922	-0.16659	1.59654e-13	0.993621	FALSE
Cfap97	0.00332043	1	-0.0747516	1	-0.0104172	1	0.0669275	1	-0.0204556	1	0.0109685	1	0.0617709	1	-0.0410318	1	0.0525646	1	-0.0474769	1	-0.00707529	0.00735906	1	1	FALSE
Cfdp1	-0.0560533	1	-0.169001	1	-0.0319472	1	0.150385	1	-0.139441	1.53677e-07	-0.0357185	1	-0.0796838	1	-0.0173658	1	-0.436527	1	-0.0993193	1	-0.0492117	-0.133723	0.00050827	1	FALSE
Cfl1	-0.250174	2.93048e-08	-0.159287	1	-0.0346922	1	-0.0259242	1	-0.25036	9.35601e-16	-0.240831	1	-0.0827305	1	-0.0421619	1	-0.25523	1	0.036375	1	-0.144088	-0.116916	9.00042e-18	1	FALSE
Cfl2	-0.0428653	1	0.0105824	1	-0.058409	1	-0.127938	1	-0.0344484	1	-0.107625	1	-0.0222031	1	0.0167609	1	-0.142221	1	-0.152053	1	-0.0506156	-0.0814681	1	1	FALSE
Cflar	-0.033841	1	-0.118985	1	-0.0817384	1	-0.0201621	1	-0.0864782	0.14079	-0.0890047	1	-0.0943661	1	-0.0433256	1	0.0159109	1	0.0364293	1	-0.0682409	-0.0348713	0.950842	1	FALSE
Cggbp1	0.00380954	1	-0.0720398	1	-0.0458873	1	-0.11797	1	-0.116224	0.0248429	-0.0480941	1	0.0702807	1	-0.226058	1	0.195285	1	0.0718349	1	-0.0696624	0.0126496	0.688149	1	FALSE
Cgn	0.00205835	1	0.0211239	1	0.0149902	1	0.0694707	1	-0.0606887	2.4822e-05	-0.00393727	1	-0.0455315	1	0.0739806	1	0.00199185	1	0.0508103	1	0.00939089	0.0154628	0.0196918	1	FALSE
Cgnl1	-0.0666248	1	0.058688	1	-0.309388	1	-0.115244	1	-0.240574	9.59621e-13	-0.0791912	1	-0.205075	1	0.187584	1	0.228078	1	-0.164618	1	-0.134628	-0.00664458	2.72298e-08	1	FALSE
Cgrrf1	-0.0112368	1	-0.0310218	1	0.00103256	1	0.0570555	1	0.00783708	1	0.019668	1	0.0747784	1	-0.0607492	1	0.0315928	1	0.0232091	1	0.00473329	0.0176998	1	1	FALSE
Chac2	-0.0572293	1	-0.0271207	1	-0.000218778	1	-0.0561505	1	-0.0227077	1	-0.0330865	1	-0.0937622	1	-0.0135643	1	-0.0403689	1	0.0216252	1	-0.0326854	-0.0318313	1	1	FALSE
Chaf1a	-0.0319007	1	-0.121247	1	-0.0645675	1	0.0427437	1	0.0113506	1	-0.100041	1	0.0317031	1	0.00369337	1	-0.0486113	1	-0.00888976	1	-0.0327242	-0.0244291	1	1	FALSE
Chaf1b	-0.06378	1	-0.158795	1	-0.0115967	1	0.0228463	1	-0.0445839	1	-0.141597	1	-0.436669	1	-0.134838	1	0.156443	1	0.0168939	1	-0.0511818	-0.107953	1	1	FALSE
Champ1	0.00767218	1	0.038942	1	0.0263519	1	-0.0685678	1	-0.00740401	1	0.067371	1	0.00995365	1	-0.0542787	1	0.0623334	1	0.0154273	1	-0.000601146	0.0201613	1	1	FALSE
Chchd1	-0.12908	1	-0.0898011	1	-0.124562	1	0.0121233	1	0.0240194	1	-0.0207101	1	-0.013307	1	-0.085598	1	-0.0398974	1	-0.0308723	1	-0.06146	-0.038077	1	1	FALSE
Chchd10	-0.0504499	1	-0.17052	1	-0.173885	1	-0.140972	1	0.0126331	1	-0.0529733	1	-0.0537982	1	-0.0128479	1	-0.107333	1	0.265118	1	-0.104639	0.00763318	1	1	FALSE
Chchd2	-0.018742	1	0.156296	1	0.0599558	1	0.300122	1	0.0697743	1	0.00547914	1	0.0238735	1	-0.231501	1	-0.215834	1	0.0554875	1	0.113481	-0.072499	1	1	FALSE
Chchd3	-0.0713389	1	-0.109967	1	-0.0999895	1	-0.109447	1	-0.0281451	1	-0.249202	1	-0.334913	1	-0.0507948	1	-0.0992075	1	-0.0064547	1	-0.0837776	-0.148114	1	1	FALSE
Chchd4	-0.0129966	1	0.0262506	1	-0.096506	1	0.0125327	1	0.0185544	1	-0.0758631	1	-0.0476093	1	-0.108138	1	0.0453109	1	-0.0433368	1	-0.010433	-0.0459273	1	1	FALSE
Chchd5	0.0469613	1	0.0387634	1	0.188326	1	0.0757637	1	0.024405	1	0.085203	1	-0.199149	1	0.121461	1	0.136932	1	0.130761	1	0.0748438	0.0550414	1	1	FALSE
Chchd6	-0.00467605	1	-0.0375012	1	0.00352735	1	0.0235478	1	-0.036386	1	-0.0807152	1	0.0881486	1	0.139377	1	0.0236588	1	-0.264522	1	-0.0102976	-0.0188105	1	1	FALSE
Chchd7	-0.0292098	1	0.094281	1	0.0147569	1	0.0758344	1	-0.0684374	1	0.0876193	1	0.23796	0.0352257	-0.0534596	1	0.0986878	1	0.268083	1	0.017445	0.127778	1	0.754171	FALSE
Chd1	-0.0154319	1	-0.112398	1	-0.280861	1	-0.278975	1	0.00443236	1	0.0439837	1	-0.0104398	1	-0.259488	1	0.194724	1	0.0319405	1	-0.136647	0.000143971	1	1	FALSE
Chd1l	0.0356781	1	-0.00689081	1	0.0139158	1	0.0113018	1	0.00348115	1	-0.00632673	1	-0.00591321	1	0.00491303	1	-0.0213121	1	0.0511407	1	0.0114972	0.00450034	1	1	FALSE
Chd2	0.0178952	1	-0.0974276	1	-0.231296	1	0.0946635	1	-0.127808	0.109789	-0.0305134	1	-0.156357	1	-0.0374182	1	0.304676	1	-0.0287496	1	-0.0687944	0.0103276	0.926506	1	FALSE
Chd3	-0.0261651	1	-0.051269	1	-0.235973	1	0.143227	1	-0.0562093	1	-0.0423705	1	-0.144867	1	0.260452	1	-0.0202828	1	0.0810943	1	-0.0452779	0.0268052	1	1	FALSE
Chd4	-0.0254204	1	0.00314236	1	-0.221276	1	-0.101104	1	0.0198701	1	-0.0780615	1	-0.282485	1	-0.227797	1	-0.0175416	1	-0.41738	1	-0.0649576	-0.204653	1	1	FALSE
Chd6	-0.0140896	1	-0.0538618	1	0.0246939	1	0.113781	1	-0.14244	4.29555e-06	0.0389848	1	0.0538426	1	-0.0141891	1	0.0962292	1	-0.0229948	1	-0.0143833	0.0303745	0.00591091	1	FALSE
Chd7	0.0233957	1	-0.0395314	1	-0.102554	1	-0.11378	1	-0.0641101	1	-0.0190731	1	-0.039899	1	-0.0185964	1	-0.0222465	1	0.0155467	1	-0.059316	-0.0168536	1	1	FALSE
Chd8	0.0436026	1	-0.00316494	1	-0.0575772	1	-0.117638	1	0.00882848	1	0.0446884	1	-0.132291	1	-0.022659	1	0.0880051	1	0.0109866	1	-0.0251898	-0.00225391	1	1	FALSE
Chd9	-0.0682519	1	-0.155456	0.0243717	-0.0689852	1	-0.246776	1	-0.152404	1.1846e-10	0.0194609	1	-0.00850771	1	0.0351728	1	-0.0990964	1	-0.0777632	1	-0.138374	-0.0261467	7.00856e-08	1	FALSE
Chek1	-0.022782	1	-0.150891	1	-0.0468512	1	-0.0177874	1	-0.0563443	1	-0.0298902	1	-0.0541684	1	0.00351298	1	-0.157871	1	-0.00241802	1	-0.0589312	-0.048167	1	1	FALSE
Chek2	-0.000807734	1	-0.00267216	1	-0.0288822	1	0.00713711	1	0.00707173	1	-0.0207446	1	-0.0167436	1	0.00879191	1	-0.0517076	1	0.0105011	1	-0.00363064	-0.0139805	1	1	FALSE
Cherp	0.0194355	1	-0.0927119	1	0.0107958	1	-0.0730218	1	0.0164323	1	-0.00126657	1	-0.0625325	1	-0.00537971	1	0.154369	1	-0.00859501	1	-0.023814	0.0153191	1	1	FALSE
Chfr	-0.0290887	1	-0.0182462	1	-0.0094346	1	-0.119338	1	-0.0131499	1	0.0087686	1	-0.0262304	1	-0.01309	1	0.0311866	1	-0.00600148	1	-0.0378515	-0.00107334	1	1	FALSE
Chic2	-0.0373499	1	-0.0471318	1	-0.271651	1	0.0162558	1	-0.0655425	1	0.0279358	1	0.059877	1	-0.143267	1	-0.225049	1	-0.0256121	1	-0.0810838	-0.0612231	1	1	FALSE
Chid1	0.035166	1	0.0357227	1	0.00875361	1	0.0295342	1	0.0203137	1	0.0031229	1	-0.243428	1	-0.0289538	1	0.119218	1	-0.00503305	1	0.025898	-0.0310147	1	1	FALSE
Chka	0.223097	1	0.0197408	1	0.0975098	1	0.150582	1	0.268574	1	0.0684844	1	-0.0568285	1	0.00167916	1	-0.0262176	1	-0.0325442	1	0.151901	-0.00908537	1	1	FALSE
Chkb	-0.0133029	1	-0.0615631	1	-0.0190106	1	0.0124805	1	-0.024769	1	-0.0323838	1	-0.0955886	1	-0.105514	1	-0.0925766	1	-0.0274214	1	-0.021233	-0.070697	1	1	FALSE
Chm	0.00174113	1	-0.0216898	1	-0.03788	1	-0.0461581	1	-0.042568	1	0.0012287	1	-0.0587528	1	-0.0201781	1	0.0483846	1	-0.0354619	1	-0.0293109	-0.0129559	1	1	FALSE
Chml	0.00764662	1	-0.045797	1	-0.0451545	1	0.0519562	1	0.00762421	1	0.0186068	1	0.0477038	1	-0.0134167	1	0.0411439	1	0.0358394	1	-0.0047449	0.0259755	1	1	FALSE
Chmp1a	-0.0428495	1	-0.0404937	1	0.0317973	1	0.0951887	1	-0.0466736	1	-0.0350004	1	-0.141123	1	-0.312933	1	0.115323	1	-0.0111249	1	-0.000606162	-0.0769715	1	1	FALSE
Chmp1b	-0.0102745	1	0.0075877	1	-0.04773	1	-0.0685406	1	-0.0124363	1	-0.0485656	1	-0.0252274	1	0.0256582	1	0.0200763	1	-0.0380357	1	-0.0262787	-0.0132188	1	1	FALSE
Chmp2a	-0.0333537	1	0.158787	1	0.356092	1	0.216802	1	0.0078679	1	0.0405912	1	-0.0540097	1	0.115842	1	0.0395197	1	0.0209739	1	0.141239	0.0325834	1	1	FALSE
Chmp2b	-0.0651933	1	0.04398	1	-0.0933439	1	-0.127604	1	-0.036768	1	-0.0372752	1	-0.00304698	1	-0.0503189	1	-0.242178	1	0.0219281	1	-0.0557858	-0.0621782	1	1	FALSE
Chmp3	0.136235	1	0.133155	1	0.223441	1	0.140602	1	0.0292698	1	0.0907901	1	0.0560225	1	-0.216599	1	-0.109637	1	-0.0455877	1	0.132541	-0.0450022	1	1	FALSE
Chmp4b	-0.175692	0.000974849	-0.0964611	1	-0.191376	1	-0.0887746	1	-0.212084	1.48954e-13	-0.0703136	1	-0.189933	1	0.00066278	1	-0.137913	1	-0.129536	1	-0.152877	-0.105407	1.19772e-11	1	FALSE
Chmp4c	-0.036511	1	-0.0388795	1	-0.045728	1	-0.0245809	1	-0.0365919	2.12278e-05	-0.0724439	8.95856e-06	0.00650967	1	0.0134711	1	0.000939591	1	-0.0167706	1	-0.0364583	-0.0136588	0.0177433	0.00987476	FALSE
Chmp5	0.00769856	1	-0.0362654	1	0.0498883	1	-0.013817	1	-0.0371868	1	-0.0879543	1	-0.0753873	1	-0.0910422	1	-0.275294	1	-0.041714	1	-0.00593644	-0.114278	1	1	FALSE
Chmp6	-0.0952607	1	0.0933165	1	-0.0502215	1	0.0494775	1	0.141551	0.96344	0.0869984	1	-0.0986224	1	0.0959127	1	-0.176692	1	0.00137166	1	0.0277726	-0.0182062	1	1	FALSE
Chmp7	0.0236179	1	0.0364859	1	-0.0201302	1	-0.0130014	1	0.0342815	1	-0.0261032	1	0.0405581	1	-0.102804	1	0.0226647	1	0.00252139	1	0.0122507	-0.0126326	1	1	FALSE
Chn1	-0.00260739	1	-0.050904	1	0.017484	1	0.088409	1	-0.00748988	1	-0.0257818	1	-0.0208175	1	0.349735	1	0.010111	1	-0.0956328	1	0.00897835	0.0435229	1	1	FALSE
Chordc1	-0.0587035	1	-0.103544	1	-0.181713	1	-0.0760552	1	-0.112563	0.00874611	-0.0611051	1	-0.225366	1	-0.130318	1	-8.40317e-05	1	0.0654993	1	-0.106516	-0.0702748	0.487391	1	FALSE
Chp1	0.0297703	1	0.0663601	1	-0.0145779	1	-0.0123759	1	0.00519484	1	0.0533708	1	0.0122697	1	-0.028165	1	-0.0920149	1	0.0483815	1	0.0148743	-0.00123156	1	1	FALSE
Chpf	0.01989	1	-0.00162277	1	-0.108672	1	-0.0240779	1	-0.0100282	1	-0.0120948	1	-0.111632	1	-0.139757	1	-0.10688	1	-0.319931	1	-0.0249022	-0.138059	1	1	FALSE
Chpf2	-0.00873768	1	-0.0182309	1	-0.0802817	1	-0.0804125	1	-0.0183623	1	0.0274801	1	0.0168263	1	0.0179982	1	-0.00731756	1	-0.022001	1	-0.041205	0.00659721	1	1	FALSE
Chpt1	-0.128215	4.25627e-05	-0.222472	0.000521609	-0.160603	1	-0.327393	1	-0.146348	6.68098e-14	-0.0492336	1	-0.149835	1	-0.174724	1	-0.0354896	1	0.0329813	1	-0.197006	-0.0752601	3.5603e-16	1	FALSE
Chrac1	0.095239	1	0.219032	1	0.0501008	1	0.204529	1	0.15076	0.0554949	0.254617	0.0155865	0.121391	1	0.41925	1	0.0566803	1	0.0285891	1	0.143932	0.176106	0.833159	0.597348	FALSE
Chrnb1	0.0099121	1	-0.100472	1	0.0661847	1	0.0697225	1	0.0258807	1	0.0342728	1	-0.0128807	1	0.104572	1	-0.173293	1	-0.0253871	1	0.0142457	-0.0145432	1	1	FALSE
Chst11	0.0402733	1	0.0619659	1	0.113403	1	0.0617542	1	0.18201	1.65024e-10	0.0294092	1	-0.0843211	1	-0.0185658	1	-0.0126476	1	-0.050674	1	0.0918813	-0.0273599	2.13014e-06	1	FALSE
Chst12	-0.0134686	1	0.0848972	1	0.113494	1	0.0684079	1	-0.0587093	0.000993279	0.0509514	1	0.128233	1	0.108006	1	0.00258503	1	-0.202786	1	0.0389242	0.0173979	0.180935	1	FALSE
Chst14	0.0244555	1	0.0820544	1	0.0120735	1	0.125653	1	-0.0442367	0.208814	0.0450781	1	0.0458151	1	-0.0271407	1	-0.0677788	1	-0.0792905	1	0.04	-0.0166634	0.978128	1	FALSE
Chst2	-0.357534	1.17143e-29	-0.280065	1.97294e-05	-0.302431	1	-0.150851	1	-0.38816	2.41115e-72	-0.29522	1.89111e-09	-0.314285	0.000966987	-0.329393	1	-0.324738	1	-0.219846	0.8705	-0.295808	-0.296696	8.14431e-98	4.20761e-08	TRUE
Chsy1	-0.112195	0.000123334	-0.032175	1	-0.0529802	1	-0.0459336	1	-0.146893	6.25897e-13	-0.11968	1	-0.12485	1	-0.11259	1	-0.119967	1	-0.218081	1	-0.0780353	-0.139034	6.80675e-12	1	FALSE
Chtf8	0.0876808	1	0.00185645	1	0.126052	1	-0.00552878	1	-0.015999	1	0.00386702	1	-0.300201	1	-0.0198041	1	0.03608	1	-0.0609883	1	0.0388124	-0.0682093	1	1	FALSE
Chtop	0.0153658	1	-0.113045	1	0.0181761	1	-0.0774524	1	-0.00139729	1	-0.135699	1	-0.142658	1	-0.279601	1	-0.259641	1	-0.0768518	1	-0.0316705	-0.17889	1	1	FALSE
Chuk	0.0250862	1	-0.143263	0.250918	-0.149222	1	-0.145239	1	0.00354911	1	0.00827616	1	-0.0830065	1	-0.0190737	1	0.012837	1	-0.0286066	1	-0.0818176	-0.0219147	0.986421	1	FALSE
Churc1	0.0746175	1	0.0285785	1	-0.164932	1	0.259152	1	0.00340238	1	0.192541	0.0033755	0.0826606	1	0.0921776	1	0.31415	1	0.255783	1	0.0401637	0.187462	1	0.32851	FALSE
Ciao1	0.0545962	1	-0.0206586	1	0.107825	1	0.00910788	1	0.0314238	1	0.124449	1	0.0715852	1	-0.096094	1	-0.0506767	1	-0.0945228	1	0.0364587	-0.00905192	1	1	FALSE
Ciapin1	-0.130063	1	-0.175195	1	0.031023	1	0.00149541	1	-0.00628211	1	-0.133435	1	-0.11658	1	-0.0652722	1	-0.197836	1	0.0814585	1	-0.0558045	-0.0863329	1	1	FALSE
Ciart	0.0351672	1	-0.0410674	1	0.0229566	1	-0.0888269	1	0.00317576	1	-0.0202226	1	0.0444002	1	0.082076	1	-0.0180081	1	-0.0320134	1	-0.0137189	0.0112464	1	1	FALSE
Cib1	0.0329355	1	0.0445248	1	0.0442204	1	0.0851526	1	0.07437	1	-0.0666463	1	0.000614854	1	-0.160403	1	0.0012169	1	0.131525	1	0.0562407	-0.0187384	1	1	FALSE
Cib2	-0.075257	0.00176032	-0.017997	1	-0.0890894	1	-0.052469	1	-0.0810603	2.60611e-10	-0.130282	1	0.0191124	1	0.0640887	1	0.0750171	1	-0.044419	1	-0.0631745	-0.00329663	1.44049e-08	1	FALSE
Cic	0.118127	1	0.0416387	1	-0.0312425	1	-0.0344102	1	0.106413	0.481937	0.0349039	1	-0.137348	1	-0.0709328	1	0.0374823	1	-0.0220854	1	0.0401052	-0.031596	0.999055	1	FALSE
Ciita	-0.0797609	2.20154e-16	-0.132251	5.25794e-06	-0.0391003	1	-0.0506062	1	-0.103589	6.84974e-32	-0.028597	1	-0.0344389	1	-0.0754853	1	-0.0298468	1	-0.0365701	1	-0.0810614	-0.0409876	7.07693e-46	1	FALSE
Cinp	0.0151274	1	-0.0602888	1	0.0474811	1	0.144118	1	0.0847661	1	-0.0686161	1	0.0250836	1	-0.0414165	1	-0.0245025	1	0.0858143	1	0.0462407	-0.00472743	1	1	FALSE
Cir1	0.108587	1	0.0620515	1	0.231182	1	0.438896	1	0.0487523	1	0.055435	1	-0.0833146	1	0.0518879	1	0.209857	1	0.0749596	1	0.177894	0.061765	1	1	FALSE
Cirbp	0.089728	1	0.167993	1	0.389498	1	0.565417	0.270264	-0.020586	1	0.0811059	1	0.40925	0.000835596	0.144072	1	0.145498	1	0.391629	1	0.23841	0.234311	0.989064	0.16517	FALSE
Cisd1	0.215304	1	0.0798396	1	0.068298	1	0.0913842	1	0.442655	4.7089e-18	0.209434	1	0.0658795	1	-0.0171906	1	-0.0895523	1	0.290234	1	0.179496	0.091761	5.50915e-13	1	FALSE
Cisd2	0.085939	1	0.00466024	1	-0.0437094	1	0.044781	1	0.142241	0.365847	0.121033	1	0.11679	1	-0.138858	1	0.0658198	1	0.0995551	1	0.0467824	0.0528681	0.996255	1	FALSE
Cisd3	0.121111	1	0.0493035	1	-0.00524573	1	0.281035	1	0.0644522	1	-0.135623	1	0.000129714	1	0.13525	1	0.108195	1	-0.122877	1	0.102131	-0.00298495	1	1	FALSE
Cish	0.0149649	1	0.209214	1	-0.0941825	1	0.191728	1	0.372259	4.03065e-07	-0.0154815	1	-0.0863216	1	-0.345607	1	0.281596	1	-0.240881	1	0.138797	-0.081339	0.00105386	1	FALSE
Cit	-0.040753	1	-0.0610138	1	-0.02015	1	0.0629423	1	0.00666221	1	-0.00340689	1	-0.0679917	1	-0.0321991	1	0.023181	1	0.0474418	1	-0.0104625	-0.00659499	1	1	FALSE
Cited2	0.175049	1	0.774597	3.67025e-05	-0.025804	1	-0.259864	1	0.41755	4.96209e-05	-0.260316	1	0.0116363	1	0.105615	1	-0.178394	1	-0.464075	1	0.216306	-0.157107	1.53256e-05	1	FALSE
Ciz1	-0.0366524	1	0.000768231	1	0.0226543	1	-0.0416224	1	-0.0548572	1	-0.01843	1	-0.0359328	1	0.0356864	1	-0.14677	1	0.0486019	1	-0.0219419	-0.023369	1	1	FALSE
Ckap2	0.0731074	1	-0.112176	1	0.0020831	1	-0.103848	1	0.0246339	1	-0.00887675	1	-0.147503	1	-0.321263	1	-0.0390952	1	0.165358	1	-0.02324	-0.0702759	1	1	FALSE
Ckap2l	-0.0114022	1	-0.0206607	1	0.0460862	1	0.0894301	1	0.0414922	1	0.0181566	1	-0.0908908	1	-0.0506916	1	-0.160639	1	0.0326216	1	0.0289891	-0.0502887	1	1	FALSE
Ckap4	-0.233055	4.40417e-09	-0.0925566	1	-0.355966	1	-0.301266	1	-0.303345	1.6105e-27	-0.22838	0.0268603	-0.159968	1	-0.26294	1	-0.176836	1	-0.452238	1	-0.257238	-0.256073	1.33311e-29	0.703164	FALSE
Ckap5	0.0183692	1	0.0394747	1	-0.231879	1	-0.0950886	1	-0.018511	1	0.0495211	1	-0.167612	1	-0.623858	1	0.0583538	1	0.0584586	1	-0.057527	-0.125027	1	1	FALSE
Ckb	-0.0357961	1	0.0339699	1	-0.103522	1	0.010738	1	-0.0411747	0.00013704	0.0116288	1	-0.0124926	1	-0.069001	1	0.0122883	1	0.029493	1	-0.027157	-0.00561672	0.0586025	1	FALSE
Cklf	-0.0378103	1	-0.100075	1	-0.0154288	1	-0.0514604	1	-0.0817425	8.42006e-05	0.0438463	1	0.0615774	1	0.0221035	1	-0.102649	1	0.0698038	1	-0.0573034	0.0189364	0.0433563	1	FALSE
Cks1b	-0.18318	1	0.168803	1	-0.0694251	1	0.00799235	1	-0.13451	0.0752713	-0.192822	1	0.0422834	1	-0.26814	1	0.171153	1	0.175916	1	-0.0420639	-0.014322	0.879304	1	FALSE
Cks2	-0.260519	0.370552	-0.266388	1	-0.0897345	1	-0.26686	1	-0.133112	1	0.036796	1	-0.102476	1	-0.233193	1	0.185469	1	0.035658	1	-0.203322	-0.0155492	0.99645	1	FALSE
Clasp1	-0.0708837	1	-0.0911774	1	-0.185579	1	-0.220226	1	-0.072131	0.545116	0.000321331	1	0.0625762	1	-0.0272262	1	-0.0507661	1	0.0423796	1	-0.128	0.00545696	0.999585	1	FALSE
Clasp2	0.022169	1	0.0394597	1	-0.117466	1	-0.0218291	1	-0.00372024	1	-0.0124271	1	0.000562648	1	0.014306	1	-0.00453994	1	-0.00974095	1	-0.0162773	-0.00236787	1	1	FALSE
Clasrp	-0.0315708	1	-0.05658	1	-0.099805	1	-0.0672345	1	-0.00338288	1	-0.0403344	1	0.015316	1	0.0126226	1	-0.0390402	1	-0.0276453	1	-0.0517146	-0.0158162	1	1	FALSE
Clca3a1	-0.040738	1	-0.0869084	0.0647895	0.0460114	1	-0.0853735	1	-0.0770674	7.59575e-18	-0.178123	7.1454e-07	-0.122749	3.00515e-05	-0.060553	1	-0.102559	1	-0.101784	1	-0.0488152	-0.113154	7.13595e-14	3.8583e-07	FALSE
Clcc1	0.00887884	1	-0.0528099	1	-0.0124865	1	0.177333	1	-0.00832399	1	0.00284365	1	-0.0200449	1	-0.159194	1	0.230077	1	0.0175322	1	0.0225183	0.0142428	1	1	FALSE
Clcf1	-0.0551866	1	-0.030955	1	-0.196165	1	0.0312605	1	0.0733164	1	0.0516154	1	0.0229696	1	-0.175117	1	0.0555669	1	-0.0774512	1	-0.0355459	-0.0244833	1	1	FALSE
Clcn3	0.0160632	1	-0.0892442	1	0.12158	1	-0.00432881	1	0.172074	0.0606371	-0.0425191	1	0.0629959	1	0.0543674	1	0.411246	1	-0.123899	1	0.0432287	0.0724381	0.847232	1	FALSE
Clcn4	-0.0256349	1	0.000130763	1	0.0440822	1	-0.0363943	1	-0.000378418	1	-0.0316168	1	0.00559308	1	-0.00625318	1	-0.039025	1	-0.0976207	1	-0.00363894	-0.0337845	1	1	FALSE
Clcn5	-0.00294658	1	-0.0217646	1	-0.0062497	1	-0.0119351	1	0.00782592	1	-0.133044	1	0.015902	1	0.0252315	1	-0.080738	1	-0.0149453	1	-0.007014	-0.0375189	1	1	FALSE
Clcn7	0.0475405	1	0.00206715	1	0.00274838	1	-0.000256325	1	0.0415911	1	-0.00447068	1	-0.0606158	1	-0.00221721	1	-0.0079822	1	-0.00921105	1	0.0187382	-0.0168994	1	1	FALSE
Cldn12	-0.00853968	1	-0.0351977	1	0.0380376	1	-0.0437796	1	-0.025082	1	-0.0121808	1	0.00619018	1	-0.0355951	1	-0.054897	1	0.00385461	1	-0.0149123	-0.0185256	1	1	FALSE
Cldn23	-0.0259047	1	-0.0300541	1	0.0458134	1	-0.0129459	1	-0.0164563	1	-0.0037983	1	-0.0340536	1	0.00895383	1	-0.00153016	1	-0.0102435	1	-0.00790954	-0.00813433	1	1	FALSE
Cldn3	-0.411828	3.22268e-09	0.0132915	1	-0.492169	1	-0.197948	1	-0.333416	4.50508e-14	-0.852653	1.30663e-14	-0.256654	1	-0.422146	1	-0.663847	1	-0.599767	1	-0.284414	-0.559013	4.19424e-17	6.46905e-10	TRUE
Cldn4	-0.251204	0.00106017	0.499135	1	-0.00741793	1	0.708941	1	-0.233023	0.000188035	-0.174583	1	-0.0525592	1	-0.744287	1	-0.584513	1	-0.550163	1	0.143286	-0.421221	0.00061963	1	FALSE
Cldn7	-0.110559	1	-0.0344109	1	0.123937	1	0.0931012	1	-0.0838929	1	-0.160834	1	-0.0830097	1	-0.173802	1	-0.0270621	1	-0.355209	1	-0.00236488	-0.159983	1	1	FALSE
Cldnd1	-0.158938	0.00385627	-0.049677	1	0.131151	1	-0.0846301	1	-0.176481	2.16741e-12	-0.0839596	1	-0.195486	1	-0.174417	1	-0.173659	1	-0.0620002	1	-0.067715	-0.137904	4.36632e-10	1	FALSE
Clec11a	-0.00734428	1	-0.00477321	1	0.0386433	1	0.0591239	1	0.00673692	1	0.00677343	1	0.00940546	1	0.0174693	1	0.0186032	1	-0.00943751	1	0.0184773	0.00856277	1	1	FALSE
Clec16a	-0.0131821	1	0.0231341	1	0.00757844	1	0.0168964	1	0.00483633	1	-0.0232785	1	0.018534	1	-0.074731	1	-0.00733648	1	-0.0137708	1	0.00785263	-0.0201166	1	1	FALSE
Clec2d	0.00340885	1	-0.0711014	1	0.0487167	1	0.118885	1	0.0221486	1	-0.0831762	1	-0.250334	1	0.00346996	1	0.0301404	1	-0.00711607	1	0.0244116	-0.0614032	1	1	FALSE
Clec4e	0.0314167	1	0.0337334	1	-0.00392824	1	-0.0168727	1	0.0125659	1	0.221803	1	0.119698	1	0.0407975	1	0.0510315	1	0.266949	1	0.011383	0.140056	1	1	FALSE
Clic1	-0.165875	1	0.038315	1	0.282773	1	0.156915	1	0.0078667	1	0.0224945	1	0.129978	1	-0.0509358	1	-0.41106	1	0.11922	1	0.063999	-0.0380607	1	1	FALSE
Clic4	-0.126175	1	-0.084187	1	-0.111631	1	-0.164661	1	0.0694981	1	-0.256337	1	-0.0812199	1	-0.416776	1	-0.186902	1	-0.129121	1	-0.0834311	-0.214071	1	1	FALSE
Clint1	0.0079889	1	0.0394056	1	-0.316806	1	-0.133124	1	0.138999	1	-0.0614302	1	-0.0800116	1	-0.245911	1	0.0971003	1	-0.3611	1	-0.0527072	-0.130271	1	1	FALSE
Clip1	0.0870659	1	0.0773236	1	0.118633	1	-0.0660973	1	0.081793	1	0.0295517	1	-0.125614	1	0.0345527	1	0.00713413	1	0.112951	1	0.0597437	0.011715	1	1	FALSE
Clip2	-0.0709738	0.346125	-0.0375838	1	-0.152411	1	-0.0297658	1	-0.12546	3.31112e-13	-0.0474987	1	-0.0418775	1	-0.111725	1	0.0346415	1	-0.00121412	1	-0.0832388	-0.0335348	4.32421e-09	1	FALSE
Clip4	-0.00443977	1	0.132736	1	-0.0903483	1	-0.451793	1	0.0113603	1	-0.0992022	1	0.0469452	1	-0.0820687	1	-0.286367	1	-0.0334858	1	-0.080497	-0.0908357	1	1	FALSE
Clk1	0.0197866	1	0.0444224	1	-0.201008	1	0.192874	1	0.00799892	1	-0.142879	1	-0.0846496	1	-0.0696194	1	0.224429	1	-0.220254	1	0.0128149	-0.0585946	1	1	FALSE
Clk2	0.0225746	1	-0.00159533	1	-0.101199	1	-0.10463	1	-0.0272216	1	-0.00265526	1	-0.110212	1	-0.0469853	1	-0.10648	1	-0.0238375	1	-0.0424142	-0.058034	1	1	FALSE
Clk3	0.00422363	1	0.00696105	1	-0.00694923	1	-0.0280315	1	0.0376845	1	-0.043073	1	0.0579685	1	0.00371652	1	-0.0370967	1	0.0310581	1	0.0027777	0.00251467	1	1	FALSE
Clk4	-0.0100577	1	0.0122253	1	-0.0532468	1	-0.129675	1	-0.0436983	1	-0.0514832	1	-0.108761	1	-0.132555	1	0.163535	1	-0.11613	1	-0.0448904	-0.0490789	1	1	FALSE
Cln3	0.060918	1	-0.0351937	1	0.0598197	1	-0.0136219	1	-0.0273006	1	-0.11304	1	-0.141637	1	-0.0545577	1	-0.0848071	1	0.0350108	1	0.00892429	-0.0718063	1	1	FALSE
Cln5	0.017471	1	-0.0255666	1	0.0143516	1	0.00985103	1	0.0348445	1	0.0197084	1	0.0402506	1	-0.0197562	1	-0.0279902	1	-0.0198564	1	0.0101903	-0.00152876	1	1	FALSE
Cln6	0.0476684	1	0.0346897	1	-0.00600276	1	0.238362	1	0.0773935	1	0.103994	1	-0.0554815	1	-0.02778	1	0.146178	1	0.0286731	1	0.0784223	0.0391166	1	1	FALSE
Cln8	-0.0110891	1	-0.0380799	1	0.00938488	1	-0.0358231	1	-0.0173618	1	-0.136914	1	-0.0532343	1	-0.146106	1	-0.0273809	1	-0.013739	1	-0.0185938	-0.0754748	1	1	FALSE
Clns1a	-0.0546562	1	-0.121915	1	-0.0321457	1	0.102149	1	-0.0436876	1	-0.066817	1	-0.0968081	1	-0.0407148	1	-0.0922195	1	-0.0693057	1	-0.0300512	-0.073173	1	1	FALSE
Clock	0.00185085	1	-0.139455	1	-0.138333	1	-0.0917434	1	-0.0729147	0.441087	-0.146241	1	0.0457123	1	-0.0612182	1	0.0616759	1	-0.138047	1	-0.088119	-0.0476235	0.998441	1	FALSE
Clp1	0.063909	1	-0.0613643	1	-0.00227842	1	-0.017604	1	0.00274956	1	0.0156936	1	0.00842014	1	-0.0402568	1	0.0159929	1	0.00274118	1	-0.00291764	0.000518181	1	1	FALSE
Clpb	0.00851083	1	-0.0615087	1	0.00917606	1	0.0856766	1	-0.03062	1	0.00910048	1	-0.203996	1	0.0186124	1	0.0327693	1	0.0133347	1	0.00224696	-0.0260357	1	1	FALSE
Clpp	-0.0607393	1	-0.140292	1	-0.0816595	1	0.138104	1	-0.00735987	1	0.096709	1	0.068114	1	-0.0528642	1	0.0739656	1	0.128229	1	-0.0303894	0.0628308	1	1	FALSE
Clptm1	0.0286066	1	0.0754254	1	0.0850721	1	0.0609446	1	-0.00616707	1	0.0739602	1	0.00665928	1	0.015349	1	0.0926828	1	0.145634	1	0.0487763	0.0668571	1	1	FALSE
Clptm1l	0.0381197	1	0.0208734	1	0.0711838	1	-0.0744274	1	0.0115215	1	-0.0405108	1	0.0362497	1	-0.0601811	1	-0.0823249	1	-0.128757	1	0.0134542	-0.0551048	1	1	FALSE
Clpx	0.0563032	1	0.0145128	1	-0.00134552	1	0.0672561	1	0.103458	1	-0.047998	1	-0.135518	1	-0.0446879	1	-0.051495	1	0.0606346	1	0.0480369	-0.0438128	1	1	FALSE
Clspn	0.0471235	1	-0.0760167	1	-0.0398025	1	0.190084	1	0.0597781	1	0.0556814	1	0.0522654	1	0.0363978	1	-0.0343578	1	0.0969161	1	0.0362332	0.0413806	1	1	FALSE
Clstn1	0.169486	0.0237469	0.137943	1	0.0580059	1	0.0686572	1	0.191976	3.34089e-06	0.125793	1	0.184435	1	-0.042539	1	-0.0441625	1	0.169198	1	0.125214	0.0785447	0.00030597	1	FALSE
Clta	-0.140057	1	0.0158853	1	-0.0487521	1	-0.0402471	1	0.000656218	1	0.0751896	1	0.129926	1	0.0903963	1	-0.204261	1	0.334513	1	-0.042503	0.0851528	1	1	FALSE
Cltb	0.159045	0.026447	0.167184	1	0.211133	1	0.192705	1	0.209974	6.17549e-12	0.00450895	1	0.137052	1	0.105997	1	-0.0255653	1	0.12555	1	0.188008	0.0695086	5.88463e-09	1	FALSE
Cltc	-0.0274209	1	-0.178806	1	-0.148502	1	-0.0347878	1	0.0354219	1	-0.139523	1	0.0715978	1	-0.173519	1	-0.0850497	1	-0.0261513	1	-0.070819	-0.0705291	1	1	FALSE
Clu	-0.0314962	1	0.874669	0.0047712	0.426526	1	1.49309	0.0026569	-0.38136	7.64259e-16	0.1464	1	0.474452	1	0.87767	1	0.498736	1	0.503086	1	0.476287	0.500069	1.98934e-15	1	FALSE
Cluap1	0.0173598	1	0.0556644	1	0.057865	1	0.105113	1	0.0355699	1	0.0331496	1	-0.0493841	1	-0.0266288	1	-0.0542053	1	-0.04764	1	0.0543143	-0.0289417	1	1	FALSE
Cluh	0.0116337	1	-0.0817532	1	-0.067853	1	-0.0987329	1	0.0330095	1	0.0214012	1	-0.0289975	1	-0.0409343	1	0.0759042	1	0.000272859	1	-0.0407392	0.0055293	1	1	FALSE
Cmas	-0.00923906	1	-0.100189	1	0.0695056	1	-0.173679	1	-0.0227853	1	-0.0511899	1	-0.109704	1	0.0132773	1	-0.0202965	1	-0.0543225	1	-0.0472773	-0.0444471	1	1	FALSE
Cmc1	0.110081	1	0.10893	1	0.165757	1	0.383825	1	-0.00381042	1	0.114987	1	0.146506	1	0.00169898	1	0.249564	1	-0.0412355	1	0.152957	0.0943041	1	1	FALSE
Cmc2	0.0337995	1	0.129896	1	0.0094881	1	0.245564	1	0.193886	4.31512e-09	0.101489	1	0.0640143	1	-0.026158	1	0.0356276	1	0.157803	1	0.122527	0.0665552	3.07732e-05	1	FALSE
Cmc4	0.0409427	1	0.00941122	1	0.0291681	1	0.0752977	1	-0.0146944	1	0.0198509	1	0.0321273	1	0.00411655	1	0.00170292	1	0.0644586	1	0.0280251	0.0244512	1	1	FALSE
Cmip	-0.0281986	1	0.0447204	1	-0.0741399	1	0.0761685	1	-0.046704	1	-0.0847459	1	0.0913106	1	0.0523277	1	0.00386681	1	-0.196648	1	-0.00563072	-0.0267778	1	1	FALSE
Cmpk1	-0.117997	1	-0.0397578	1	-0.130805	1	0.0239913	1	-0.0477197	1	-0.177478	1	-0.0791116	1	-0.142075	1	-0.239638	1	-0.132707	1	-0.0624576	-0.154202	1	1	FALSE
Cmss1	-0.0405334	1	-0.0821023	1	0.122263	1	0.0126095	1	0.0318852	1	0.0611867	1	-0.0119327	1	-0.0141164	1	-0.0550072	1	0.0803486	1	0.00882439	0.0120958	1	1	FALSE
Cmtm3	-0.166079	5.11667e-10	-0.118504	0.612792	-0.23465	1	-0.119725	1	-0.274227	1.58706e-41	-0.198047	1	-0.055163	1	-0.164228	1	-0.1708	1	-0.133555	1	-0.182637	-0.144359	3.86413e-44	1	FALSE
Cmtm4	0.0166486	1	-0.0154755	1	0.0558896	1	0.0168065	1	0.0395276	1	-0.2846	1	-0.0226481	1	0.019769	1	0.00870118	1	0.00398414	1	0.0226794	-0.0549587	1	1	FALSE
Cmtm6	-0.0022756	1	0.00970458	1	0.0155786	1	0.0851605	1	-0.0252016	1	0.0133144	1	0.0437777	1	-0.091349	1	-0.189673	1	0.0218313	1	0.0165933	-0.0404198	1	1	FALSE
Cmtm7	-0.0823777	1	-0.0300978	1	-0.168206	1	-0.0553421	1	-0.0273643	1	0.185808	0.107243	0.124645	1	-0.0353406	1	0.0135764	1	-0.063146	1	-0.0726776	0.0451086	1	0.923925	FALSE
Cmtr1	0.00516785	1	-0.00713856	1	0.00840856	1	0.0115222	1	-0.00904212	1	-0.0125488	1	-0.0189823	1	-0.0741074	1	0.0179999	1	0.00899188	1	0.00178359	-0.0157294	1	1	FALSE
Cnbp	-0.155899	0.270691	-0.142352	1	0.0346645	1	0.172805	1	-0.125092	0.146956	-0.157154	1	-0.116937	1	0.0872846	1	-0.010446	1	-0.00933485	1	-0.0431746	-0.0413173	0.776254	1	FALSE
Cndp2	-0.0223612	1	-0.0525995	1	-0.091806	1	0.0225641	1	0.00256612	1	0.0203383	1	0.0115563	1	0.0327559	1	-0.2665	1	-0.00310268	1	-0.0283273	-0.0409905	1	1	FALSE
Cnep1r1	0.00545576	1	-0.0831065	1	0.0918336	1	0.0706765	1	-0.048877	1	-0.192189	1	0.0111642	1	0.00615115	1	0.1072	1	-0.00548168	1	0.00719647	-0.0146311	1	1	FALSE
Cnih1	-0.0608897	1	-0.0172915	1	0.0278571	1	-0.00139624	1	0.0630142	1	-0.0330095	1	-0.164554	1	-0.0349481	1	-0.0215429	1	-0.141927	1	0.00225877	-0.0791962	1	1	FALSE
Cnih4	-0.265949	8.6189e-07	-0.147275	1	0.138744	1	0.0547358	1	-0.264226	3.61809e-12	0.0451948	1	-0.026109	1	0.0283057	1	-0.29487	1	-0.074622	1	-0.0967939	-0.0644201	3.79736e-13	1	FALSE
Cnksr1	-0.00122502	1	-0.0138293	1	0.0479723	1	-0.0387334	1	-0.00327197	1	-0.0195497	1	0.0411749	1	-0.0419757	1	0.00164342	1	-0.0107973	1	-0.00181749	-0.00590087	1	1	FALSE
Cnksr3	0.0243973	1	0.0186798	1	0.00793918	1	-0.0414285	1	-0.00410809	1	-0.0126419	1	0.00326073	1	-0.0140625	1	-0.10587	1	-0.0117795	1	0.00109595	-0.0282186	1	1	FALSE
Cnn2	-0.245894	3.9363e-07	-0.22501	1	-0.335381	1	-0.41388	1	-0.402725	1.87671e-25	-0.173553	1	-0.356116	1	-0.768055	1	-0.360942	1	-0.425098	1	-0.324578	-0.416753	8.60016e-26	1	FALSE
Cnn3	-0.239173	6.01875e-06	0.00150533	1	0.0251707	1	-0.476163	1	-0.432939	9.3818e-40	-0.440566	0.0335467	-0.447693	1	-0.272828	1	-0.649133	0.581828	-0.361389	1	-0.22432	-0.434322	2.63781e-38	0.64126	FALSE
Cnnm2	-0.0686008	1	-0.0092889	1	-0.0771507	1	-0.0533214	1	-0.0207646	1	0.0195879	1	-0.025158	1	-0.0365484	1	0.0321322	1	0.0326406	1	-0.0458253	0.00453086	1	1	FALSE
Cnnm3	-0.0175643	1	-0.0507063	1	-0.0135411	1	0.0733705	1	-0.0116105	1	0.000857873	1	-0.0385208	1	-0.0100974	1	-0.0125379	1	-0.0130215	1	-0.00401032	-0.0146639	1	1	FALSE
Cnnm4	-0.110477	0.00201613	-0.0763681	1	-0.0997324	1	-0.0229905	1	-0.14303	1.2038e-12	-0.0628261	1	-0.063226	1	-0.0503318	1	-0.0680062	1	-0.101967	1	-0.0905196	-0.0692715	1.46565e-10	1	FALSE
Cnot1	-0.00977783	1	-0.155459	1	-0.177696	1	-0.316036	1	-0.0239798	1	-0.076334	1	-0.0795007	1	-0.0561243	1	-0.0261932	1	0.082069	1	-0.13659	-0.0312166	1	1	FALSE
Cnot10	0.00639903	1	0.0210859	1	0.0797886	1	-0.0786757	1	-0.039883	1	-0.0986979	1	0.035054	1	0.00719698	1	-0.081266	1	-0.0359972	1	-0.00225703	-0.034742	1	1	FALSE
Cnot11	-0.063853	1	-0.0440681	1	0.0310709	1	-0.0762312	1	-0.0080291	1	-0.057539	1	-0.059384	1	-0.170864	1	0.170234	1	-0.0129617	1	-0.0322221	-0.0261028	1	1	FALSE
Cnot2	-0.0308873	1	-0.0511651	1	0.0361462	1	-0.091333	1	-0.0125878	1	-0.0454019	1	0.0886893	1	0.0187022	1	0.0363314	1	-0.252091	1	-0.0299654	-0.030754	1	1	FALSE
Cnot3	-0.0172711	1	-0.0346118	1	-0.141947	1	0.0879178	1	0.00831356	1	-0.0940959	1	-0.207243	1	-0.223991	1	-0.0828392	1	-0.195801	1	-0.0195196	-0.160794	1	1	FALSE
Cnot4	-0.0160606	1	-0.078491	1	-0.194416	1	-0.0434027	1	-0.0535581	1	0.0565511	1	0.0892486	1	0.00992764	1	0.131439	1	-0.00116764	1	-0.0771856	0.0571998	1	1	FALSE
Cnot6	-0.0405116	1	-0.0578676	1	-0.143415	1	0.0126924	1	-0.0775158	0.186104	-0.243194	1	-0.315086	1	-0.0312505	1	-0.0264833	1	-0.0952282	1	-0.0613236	-0.142248	0.97155	1	FALSE
Cnot6l	0.00697605	1	-0.0794916	1	-0.043603	1	0.0148486	1	-0.0250627	1	-0.0241417	1	-0.100619	1	-0.0274167	1	0.0348496	1	-0.0652929	1	-0.0252665	-0.0365242	1	1	FALSE
Cnot7	-0.0820222	1	-0.216703	0.21461	-0.256933	1	-0.0861717	1	-0.120309	0.00249232	-0.0901471	1	-0.117549	1	-0.0891872	1	-0.154508	1	-0.0778895	1	-0.152428	-0.105856	0.12964	1	FALSE
Cnot8	-0.076411	1	-0.0278897	1	-0.0153424	1	0.0472401	1	-0.0224989	1	-0.131574	1	-0.0678695	1	-0.0287528	1	-0.231491	1	-0.0678949	1	-0.0189804	-0.105516	1	1	FALSE
Cnot9	0.0108144	1	0.0297729	1	0.0419168	1	0.0877856	1	-0.0166843	1	-0.0273122	1	-0.107354	1	-0.0420722	1	-0.0788057	1	-0.0627061	1	0.0307211	-0.0636501	1	1	FALSE
Cnp	-0.0444486	1	-0.090444	1	-0.0697175	1	0.0141364	1	-0.0177745	1	0.0425231	1	-0.0106013	1	-0.00818779	1	0.0928726	1	0.16567	1	-0.0416497	0.0564554	1	1	FALSE
Cnppd1	0.0324549	1	0.0181142	1	-0.0817557	1	-0.0610024	1	0.0110149	1	3.3134e-05	1	0.0395623	1	0.0809441	1	-0.0138251	1	0.0348073	1	-0.0162348	0.0283043	1	1	FALSE
Cnpy2	-0.125957	0.741998	0.10218	1	-0.0498588	1	0.225316	1	-0.260423	1.41501e-11	0.188285	1	0.147846	1	0.17737	1	0.306201	1	0.176289	1	-0.0217487	0.199198	2.10566e-07	1	FALSE
Cnpy3	0.0463032	1	-0.0933703	1	0.175074	1	-0.0425454	1	-0.0364326	1	0.0580994	1	-0.0019796	1	-0.0622374	1	0.159374	1	0.0358019	1	0.00980575	0.0378117	1	1	FALSE
Cnpy4	-0.0396535	1	-0.000289432	1	-0.0393851	1	0.0338018	1	-0.0495241	0.2995	0.0262662	1	0.0384369	1	-0.0272681	1	0.00164724	1	0.0327768	1	-0.0190101	0.0143718	0.992106	1	FALSE
Cnst	0.0500534	1	0.0206637	1	-0.00131518	1	0.0392135	1	0.0734232	0.0929315	0.0145718	1	0.0216997	1	0.0430924	1	-0.0524084	1	0.0358895	1	0.0364077	0.012569	0.90713	1	FALSE
Cntrl	0.0285388	1	-0.0903117	0.570548	-0.0639744	1	-0.0996766	1	-0.0575089	1	-0.038307	1	-0.0626623	1	-0.00716952	1	0.0461278	1	-0.0482388	1	-0.0565865	-0.02205	0.999709	1	FALSE
Cntrob	0.0147176	1	-0.00771173	1	0.0415764	1	-0.00771417	1	-0.000821627	1	-0.0124706	1	0.00728851	1	-0.0404186	1	0.00705268	1	0.0464287	1	0.00800931	0.00157612	1	1	FALSE
Coa3	-0.00884981	1	0.00480087	1	0.0295222	1	-0.0224473	1	0.0588638	1	0.0905476	1	-0.106664	1	0.221021	1	-0.161226	1	-0.162949	1	0.0123779	-0.0238539	1	1	FALSE
Coa4	0.0003842	1	0.0590823	1	0.0124164	1	0.0813671	1	0.011792	1	0.0138722	1	0.0409767	1	0.0241877	1	0.0322473	1	0.00817634	1	0.0330084	0.023892	1	1	FALSE
Coa5	-0.0163788	1	0.00707411	1	-0.017848	1	-0.204323	1	-0.0209889	1	0.0133359	1	-0.0118913	1	0.114584	1	0.135126	1	0.0585367	1	-0.0504929	0.0619381	1	1	FALSE
Coa6	0.0194642	1	-0.0314455	1	-0.0314217	1	-0.0216704	1	0.0103069	1	0.106785	1	0.094954	1	0.0153136	1	-0.142766	1	0.00054655	1	-0.0109533	0.0149665	1	1	FALSE
Coa7	0.00549693	1	-0.0328964	1	-0.0566407	1	0.0291242	1	-0.0221852	1	0.0520679	1	0.0140614	1	0.0145458	1	-0.0173335	1	0.0980444	1	-0.0154202	0.0322772	1	1	FALSE
Coasy	0.0583213	1	0.0250052	1	0.0194444	1	0.342637	1	-0.0111703	1	0.0575693	1	-0.0290228	1	0.100627	1	-0.130232	1	0.0608807	1	0.0868475	0.0119645	1	1	FALSE
Cobll1	0.0289212	1	0.0636867	1	-0.0497696	1	0.0107103	1	0.0454285	1	0.0334471	1	0.0398287	1	0.0139588	1	0.0247997	1	0.0528834	1	0.0197954	0.0329835	1	1	FALSE
Cog1	-0.0176962	1	-0.0247604	1	-0.0757329	1	-0.052174	1	-0.015291	1	-0.0123799	1	0.00363713	1	-0.0461738	1	-0.0060277	1	0.00921215	1	-0.0371309	-0.0103464	1	1	FALSE
Cog2	-0.00101111	1	-0.0266331	1	-0.051877	1	-0.055931	1	-0.0247744	1	0.011162	1	-0.0747991	1	0.353752	1	0.0349076	1	-0.0256794	1	-0.0320453	0.0598686	1	1	FALSE
Cog3	-0.0116485	1	-0.0112456	1	0.027163	1	-0.0421511	1	0.00480523	1	-0.0248001	1	-0.00232761	1	0.0289139	1	-0.00213012	1	0.0231303	1	-0.00661538	0.00455728	1	1	FALSE
Cog4	0.00611204	1	-0.046815	1	-0.160919	1	0.107934	1	-0.0171591	1	-0.0642248	1	0.0198162	1	-0.00865366	1	-0.266913	1	-0.093126	1	-0.0221694	-0.0826204	1	1	FALSE
Cog5	0.00949137	1	-0.0620354	0.764572	-0.0441575	1	-0.00390487	1	0.00980954	1	0.016563	1	0.000141079	1	-0.00181822	1	-0.000576641	1	0.00420358	1	-0.0181594	0.00370256	0.999991	1	FALSE
Cog6	0.00718142	1	0.0213285	1	-0.02151	1	-0.117572	1	0.0128947	1	0.0297257	1	-0.0318238	1	-0.0631275	1	-0.0401531	1	-0.0141837	1	-0.0195354	-0.0239125	1	1	FALSE
Cog7	-0.031012	1	0.0590314	1	-0.0288174	1	-0.0792466	1	0.00945929	1	0.040388	1	-0.0854107	1	-0.0294451	1	0.0863892	1	-0.0175147	1	-0.0141171	-0.00111866	1	1	FALSE
Cog8	-0.0202182	1	-0.030153	1	-0.0131384	1	0.0215726	1	-0.0304284	1	-0.0683385	1	-0.00699049	1	-0.0167652	1	0.0268199	1	-0.0165301	1	-0.0144731	-0.0163609	1	1	FALSE
Coil	-0.0145558	1	-0.00256739	1	-0.0474333	1	-0.032878	1	-0.00308363	1	0.022795	1	0.0114832	1	0.063778	1	0.0384509	1	0.0118898	1	-0.0201036	0.0296794	1	1	FALSE
Col12a1	-0.0132974	1	-0.00602752	1	0.00619228	1	-0.0713944	1	-0.039329	0.000698695	-0.178757	1	-0.123355	1	-0.0269264	1	-0.0725703	1	-0.120569	1	-0.0247712	-0.104436	0.150054	1	FALSE
Col16a1	0.0280854	1	0.0591969	1	-0.0883766	1	0.322084	1	0.00887253	1	-0.0124987	1	-0.0745646	1	0.130054	1	-0.104547	1	0.102732	1	0.0659724	0.00823518	1	1	FALSE
Col18a1	0.409957	1.92987e-06	0.418217	0.00934453	0.251735	1	0.544752	1	0.130352	1	0.333131	0.00752006	0.433139	4.55484e-05	0.472993	1	0.611168	1	0.314756	1	0.351003	0.433037	9.62052e-05	0.000932718	FALSE
Col1a1	-0.0301628	1	0.0156169	1	0.0246177	1	-0.161464	1	0.00307028	1	-0.0491725	1	-0.360096	1	-0.133219	1	-0.0801404	1	-0.153127	1	-0.0296643	-0.155151	1	1	FALSE
Col1a2	0.00394439	1	0.0273606	1	0.0631878	1	-0.0271659	1	0.00965641	1	-0.185428	1	0.0148518	1	-0.0859302	1	0.035708	1	0.003813	1	0.0153966	-0.0433971	1	1	FALSE
Col3a1	0.00520215	1	-0.0328958	1	0.0234661	1	-0.212303	1	0.0663841	1	-0.110714	1	-0.309775	1	-0.191507	1	-0.0050438	1	-0.130989	1	-0.0300294	-0.149606	1	1	FALSE
Col4a1	0.258391	1	0.10765	1	0.216723	1	0.219325	1	-0.0289825	1	0.221616	1	0.283375	1	-0.00286956	1	0.274078	1	0.110096	1	0.154621	0.177259	1	1	FALSE
Col4a2	0.129098	1	0.173235	1	0.20119	1	0.208411	1	0.0549802	1	0.149655	1	0.218413	1	-0.00953985	1	0.186498	1	0.0981217	1	0.153383	0.12863	1	1	FALSE
Col4a3bp	-0.027664	1	0.0314442	1	-0.156814	1	-0.211042	1	-0.0110847	1	0.0597069	1	-0.00922885	1	0.0957523	1	-0.143935	1	-0.112681	1	-0.0750321	-0.022077	1	1	FALSE
Col4a5	0.0662422	1	0.0454389	1	0.0836495	1	0.137177	1	0.0531606	1	0.0380494	1	-0.00313407	1	-0.032603	1	0.15052	1	0.0327235	1	0.0771336	0.0371111	1	1	FALSE
Col5a1	-0.113717	7.00853e-09	-0.0632892	0.0132609	0.00107739	1	-0.173529	1	-0.109782	1.03204e-14	-0.0748381	1	0.00954983	1	-0.0792402	1	-0.0897229	1	-0.103807	0.650664	-0.091848	-0.0676116	4.02416e-19	0.999914	FALSE
Col5a2	-0.00778437	1	0.0133608	1	-0.0223078	1	-0.0682564	1	-0.00737358	1	0.00100631	1	-0.0464386	1	-0.00248899	1	0.0864698	1	0.0101611	1	-0.0184723	0.00974194	1	1	FALSE
Col6a1	0.094182	1	0.180381	1	0.317846	1	-0.13154	1	0.344602	1	0.143308	1	0.197029	1	-0.187163	1	-0.239677	1	0.00531778	1	0.161094	-0.0162372	1	1	FALSE
Col6a2	-0.0402676	1	0.0928618	1	0.0488265	1	-0.149817	1	-0.020552	1	-0.0704962	1	-0.0235858	1	-0.182943	1	-0.286975	1	0.0538336	1	-0.0137897	-0.102033	1	1	FALSE
Col7a1	-0.548172	1.52252e-38	-0.24809	0.0854817	-0.582929	1	-0.379148	1	-0.544458	1.64339e-59	-0.45776	1.88309e-10	-0.204707	1	-0.211272	1	-0.306082	1	-0.34389	1	-0.460559	-0.304742	2.32075e-90	2.37693e-06	TRUE
Col8a1	0.0186438	1	-0.0760829	1	-0.105064	1	-0.431007	1	-0.255528	2.28018e-19	-0.126199	1	-0.00786347	1	-0.118074	1	-0.186177	1	-0.00884342	1	-0.169807	-0.0894314	3.54805e-14	1	FALSE
Colgalt1	0.0785584	1	-0.0278552	1	-0.0613909	1	0.0964183	1	-0.018531	1	-0.0225735	1	0.0532796	1	-0.00270832	1	-0.0121149	1	-0.0293173	1	0.0134399	-0.00268691	1	1	FALSE
Commd1	-0.0921113	1	0.0822055	1	0.0154146	1	0.164632	1	-0.109423	0.00789148	0.163248	1	0.0272636	1	0.2095	1	-0.0883133	1	0.0673566	1	0.0121435	0.0758111	0.468646	1	FALSE
Commd10	0.0460521	1	0.0932528	1	0.0743024	1	0.0920904	1	-0.00979174	1	0.0320868	1	0.00546526	1	-0.0305582	1	-0.182439	1	0.0485068	1	0.0591812	-0.0253876	1	1	FALSE
Commd2	-0.201834	2.24404e-07	-0.0739593	1	0.0153844	1	-0.0520226	1	-0.159105	8.98642e-10	-0.0082744	1	-0.209573	1	0.00442337	1	-0.29801	1	-0.247375	1	-0.0943073	-0.151762	1.60593e-11	1	FALSE
Commd3	-0.114506	1	-0.0272213	1	0.119495	1	0.06603	1	-0.0817942	1	0.00623776	1	0.191558	0.744076	0.00394541	1	-0.120733	1	-0.0729169	1	-0.00759928	0.00161828	1	0.999985	FALSE
Commd4	-0.0513175	1	0.182151	1	-0.154583	1	-0.081403	1	-0.0544961	1	0.106179	1	0.0243723	1	-0.0389687	1	0.120056	1	0.154936	1	-0.0319298	0.073315	1	1	FALSE
Commd6	0.0190978	1	-0.041187	1	0.0305474	1	0.106471	1	0.0160187	1	0.0316561	1	0.00566874	1	-0.269273	1	0.0498796	1	0.140427	1	0.0261896	-0.00832831	1	1	FALSE
Commd7	0.108273	1	-0.354731	1	0.00145618	1	0.0538977	1	-0.0334249	1	-0.142475	1	-0.14929	1	-0.0400672	1	-0.728556	1	-0.0832758	1	-0.0449059	-0.228733	1	1	FALSE
Commd8	-0.0106376	1	-0.103606	1	0.103701	1	-0.107637	1	-0.0426063	1	0.0117369	1	0.113064	1	0.0356971	1	0.00573144	1	-0.318752	1	-0.0321572	-0.0305046	1	1	FALSE
Commd9	-0.00580143	1	0.0318111	1	0.12878	1	0.157003	1	-0.0155378	1	-0.0256199	1	-0.0947293	1	0.313552	1	0.00576335	1	0.0640321	1	0.0592509	0.0525996	1	1	FALSE
Comt	-0.0426666	1	-0.00248009	1	-0.0397075	1	0.162978	1	-0.118697	0.000166668	-0.0432846	1	-0.299943	1	-0.109408	1	-0.169789	1	-0.259518	1	-0.00811464	-0.176388	0.0659881	1	FALSE
Comtd1	0.0103292	1	-0.0804932	1	0.0419604	1	-0.163664	1	0.0498315	1	0.108053	1	0.0709716	1	0.02867	1	0.0367284	1	0.0752446	1	-0.0284072	0.0639334	1	1	FALSE
Cop1	-0.0133244	1	-0.128509	1	-0.146542	1	0.127354	1	-0.0774436	0.634553	-0.0347645	1	-0.0384759	1	-0.105701	1	-0.0939578	1	-0.0598038	1	-0.047693	-0.0665406	0.999889	1	FALSE
Copa	-0.0362985	1	-0.0413738	1	-0.148427	1	-0.0982067	1	-0.0914898	0.584323	-0.137161	1	-0.259928	1	-0.316205	1	0.10214	1	-0.0200025	1	-0.0831591	-0.126231	0.999761	1	FALSE
Copb1	-0.0493773	1	-0.0846807	1	-0.120066	1	-0.0628593	1	-0.166453	1.36648e-07	-0.114114	1	-0.00370546	1	0.0171618	1	0.0694649	1	0.0488073	1	-0.0966873	0.00352283	0.000464652	1	FALSE
Copb2	-0.136609	1	-0.0621778	1	-0.266325	1	-0.13565	1	-0.0634767	1	-0.0716988	1	0.0202597	1	-0.34776	1	-0.19591	1	-0.0282201	1	-0.132848	-0.124666	1	1	FALSE
Cope	-0.104954	1	0.0221686	1	0.245048	1	-0.202326	1	-0.117155	0.00161666	-0.0147422	1	0.012289	1	0.182238	1	-0.169113	1	0.108507	1	-0.0314436	0.0238358	0.231905	1	FALSE
Copg1	0.0130226	1	0.0130112	1	-0.00879499	1	0.0640054	1	-0.0738898	0.0776723	-0.105815	1	-0.0913312	1	-0.228532	1	-0.104777	1	-0.0609441	1	0.00147088	-0.11828	0.883674	1	FALSE
Copg2	-0.0116295	1	0.0270656	1	-0.0438092	1	-0.0797911	1	-0.0597481	1	-0.0517387	1	-0.0220599	1	-0.030859	1	0.442866	1	0.00416998	1	-0.0335825	0.0684756	1	1	FALSE
Coprs	0.050264	1	-0.0379854	1	0.00848166	1	-0.0193527	1	0.0550877	1	0.0567681	1	0.025117	1	-0.00701532	1	0.0304618	1	0.0530965	1	0.0112991	0.0316856	1	1	FALSE
Cops2	-0.00100077	1	0.024439	1	-0.0139067	1	0.0595668	1	-0.0673759	1	0.014506	1	-0.177339	1	0.078017	1	0.0268924	1	-0.339056	1	0.000344487	-0.0793959	1	1	FALSE
Cops3	-0.112605	1	0.0070088	1	-0.0185946	1	-0.134232	1	-0.0493587	1	-0.178911	1	-0.184502	1	-0.197718	1	-0.0304716	1	0.0800012	1	-0.0615562	-0.10232	1	1	FALSE
Cops4	-0.130384	0.109673	-0.0337524	1	-0.138977	1	-0.0921287	1	-0.105729	0.000822955	-0.108862	1	-0.0393002	1	-0.0521397	1	-0.0458023	1	-0.26193	1	-0.100194	-0.101607	0.0452823	1	FALSE
Cops5	-0.0291782	1	-0.0401021	1	0.119015	1	-0.034479	1	-0.0765047	0.0555465	-0.0685085	1	-0.101104	1	0.0172785	1	0.0300427	1	-0.0619407	1	-0.0122498	-0.0368463	0.833309	1	FALSE
Cops6	-0.0852053	1	-0.0454352	1	0.031004	1	-0.101248	1	-0.0820302	1	0.156996	1	-0.141458	1	0.0643341	1	-0.0145673	1	-0.0462522	1	-0.0565829	0.00381061	1	1	FALSE
Cops7a	0.058738	1	0.0452505	1	0.256276	1	0.0410157	1	0.0705646	1	0.125175	0.96517	0.0157764	1	0.101651	1	0.180621	1	0.0990092	1	0.094369	0.104446	1	1	FALSE
Cops7b	0.00168914	1	-0.0320381	1	-0.0513498	1	0.0194932	1	-0.012758	1	0.00826096	1	-0.0297132	1	-0.050864	1	0.01748	1	0.0587809	1	-0.0149927	0.000788914	1	1	FALSE
Cops8	-0.0604129	1	-0.0496759	1	0.0208515	1	-0.0921717	1	-0.0697997	1	-0.0410784	1	-0.0410809	1	0.0811426	1	-0.0887096	1	-0.164967	1	-0.0502417	-0.0509387	1	1	FALSE
Cops9	0.07785	1	0.233953	0.370907	0.105853	1	0.157275	1	-0.0356417	1	-0.128762	1	0.0463234	1	0.00958846	1	-0.12697	1	0.132352	1	0.107858	-0.0134936	0.996464	1	FALSE
Copz1	-0.0510928	1	-0.0123093	1	0.00332481	1	-0.048067	1	-0.0358112	1	0.0572058	1	0.0387549	1	0.0462608	1	0.0706048	1	0.0290786	1	-0.0287911	0.048381	1	1	FALSE
Coq10a	0.0157094	1	0.0203031	1	0.0175293	1	-0.00819608	1	0.00964009	1	-0.0438306	1	0.012164	1	-0.00712416	1	0.0423937	1	0.12925	1	0.0109972	0.0265706	1	1	FALSE
Coq10b	0.0570986	1	0.0125958	1	0.126565	1	-0.163178	1	-0.00252337	1	0.136183	1	-0.0125128	1	-0.0747662	1	-0.151272	1	0.0357053	1	0.00611168	-0.0133325	1	1	FALSE
Coq2	0.00812751	1	0.0169868	1	-0.0641753	1	0.046042	1	-0.0123619	1	0.0103814	1	0.0338308	1	-0.110818	1	-0.00224562	1	0.0613526	1	-0.00107615	-0.00149981	1	1	FALSE
Coq3	-0.0350585	1	0.0073004	1	-0.0626629	1	-0.0273742	1	-0.0208163	1	-0.0460762	1	-0.15898	1	-0.0168238	1	0.0185059	1	0.0195917	1	-0.0277223	-0.0367564	1	1	FALSE
Coq4	-0.0416269	1	-0.0501784	1	-0.0211721	1	0.161299	1	-0.0192065	1	-0.0421502	1	0.0062374	1	0.0979722	1	-0.0317943	1	0.0548606	1	0.00582297	0.0170252	1	1	FALSE
Coq5	0.0185962	1	-0.0624186	1	0.00453062	1	0.0137461	1	0.00621655	1	0.00461806	1	-0.00240929	1	0.00290666	1	0.100588	1	0.0588135	1	-0.00386582	0.0329034	1	1	FALSE
Coq6	-0.0339748	1	-0.0488	1	0.11805	1	0.00242761	1	-0.0304807	1	-0.0317156	1	-0.0362493	1	0.0344968	1	-0.0739642	1	0.0502693	1	0.00144447	-0.0114326	1	1	FALSE
Coq7	0.00361446	1	-0.076196	1	-0.0760841	1	0.0262803	1	-0.0120484	1	0.13774	1	-0.029534	1	-0.0105988	1	0.103484	1	0.18177	1	-0.0268868	0.0765723	1	1	FALSE
Coq8b	0.00448431	1	-0.0302003	1	0.0747116	1	0.0120104	1	0.00151188	1	-0.080206	1	-0.173948	1	-0.0698164	1	-0.0113824	1	-0.0125197	1	0.0125036	-0.0695744	1	1	FALSE
Coq9	0.0432553	1	0.0903258	1	0.0424963	1	0.0841124	1	0.10952	3.53239e-05	-0.00564215	1	0.0409687	1	0.0944424	1	0.0827433	1	0.0696466	1	0.073942	0.0564318	0.0248474	1	FALSE
Coro1b	-0.0943928	1	-0.0775851	1	0.231672	1	-0.025925	1	0.0175286	1	-0.0588021	1	-0.0917287	1	-0.0513177	1	0.036922	1	-0.00157242	1	0.0102596	-0.0332998	1	1	FALSE
Coro1c	0.0362791	1	-0.0587992	1	-0.018362	1	0.120805	1	-0.0373806	1	0.018903	1	-0.000713864	1	-0.051211	1	-0.063735	1	-0.0249464	1	0.00850839	-0.0243407	1	1	FALSE
Coro2a	-0.00667902	1	0.00183165	1	-0.0636327	1	0.123018	1	-0.0202012	1	-0.0023829	1	0.00647588	1	-0.0812528	1	-0.0686254	1	-0.0604139	1	0.00686742	-0.0412398	1	1	FALSE
Coro6	-0.0106418	1	0.00327611	1	-0.124326	1	-0.0741973	1	-0.0835807	8.28757e-17	0.0252528	1	-0.0386226	1	0.043923	1	-0.0208873	1	0.0748268	1	-0.0578939	0.0168986	7.25349e-12	1	FALSE
Coro7	0.010688	1	0.0452133	1	-0.0301784	1	0.00289646	1	0.0079425	1	0.0138241	1	-0.0206883	1	0.043832	1	0.00787872	1	0.031394	1	0.00731237	0.0152481	1	1	FALSE
Cotl1	-0.378488	8.35949e-22	-0.092151	1	0.0694414	1	-0.152877	1	-0.476104	8.7313e-61	-0.591565	0.00727162	-0.368976	1	-0.423848	1	-0.443354	1	-0.899181	0.273673	-0.206036	-0.545385	3.78554e-74	0.256737	FALSE
Cox10	0.00184177	1	-0.0161024	1	-0.0123863	1	0.12198	1	-0.012276	1	0.00437864	1	0.0184155	1	0.0202129	1	-0.0106633	1	0.0302099	1	0.0166115	0.0125107	1	1	FALSE
Cox11	-0.0209023	1	-0.0234907	1	-0.0543551	1	0.108858	1	-0.0292123	1	0.00457357	1	-0.0108895	1	-0.0104614	1	-0.0101731	1	0.0569189	1	-0.00382055	0.00599371	1	1	FALSE
Cox14	-0.0390743	1	0.193495	1	0.0209376	1	0.211048	1	0.0260198	1	0.0981141	1	0.152125	1	-0.088457	1	0.096096	1	0.0879314	1	0.0824852	0.069162	1	1	FALSE
Cox15	-0.00758584	1	-0.0324808	1	-0.0495079	1	-0.000674215	1	-0.00204241	1	-0.00877892	1	-0.0190107	1	-0.0113566	1	-0.211552	1	0.00597053	1	-0.0184582	-0.0489456	1	1	FALSE
Cox16	0.0102045	1	-0.079629	0.0594018	-0.0884	1	-0.0772499	1	-0.0372607	1	-0.0607344	1	0.0250283	1	-0.0152646	1	0.070199	1	-0.113925	1	-0.054467	-0.0189394	0.844009	1	FALSE
Cox17	0.00787907	1	-0.0707603	1	0.000909692	1	0.0116011	1	-0.00663945	1	-0.197084	1	-0.414934	0.00288104	-0.470276	1	-0.310205	1	-0.13362	1	-0.011402	-0.305224	1	0.305692	FALSE
Cox18	-0.0573775	1	-0.125911	1	0.156475	1	-0.120729	1	-0.0445328	1	0.0556069	1	-0.0337323	1	-0.0251803	1	-0.0571875	1	-0.217364	1	-0.0384151	-0.0555714	1	1	FALSE
Cox19	-0.0719874	1	-0.00681919	1	0.0196953	1	0.0494126	1	-0.0611793	1	0.0107391	1	0.0995539	1	-0.0526443	1	-0.0928677	1	-0.0540175	1	-0.0141756	-0.0178473	1	1	FALSE
Cox20	-0.00985545	1	0.176333	1	0.100321	1	0.180739	1	-0.0631183	1	0.00774128	1	0.150468	1	0.105153	1	-0.12311	1	0.0670847	1	0.0768839	0.0414673	1	1	FALSE
Cox4i1	0.0358046	1	-0.0819383	1	0.399325	0.501958	0.176408	1	0.144129	0.000684782	0.353323	3.1687e-14	0.355809	3.56992e-05	0.363303	1	0.165377	1	0.563755	7.09585e-05	0.134746	0.360313	0.101035	2.42781e-17	FALSE
Cox5a	-0.152238	0.345344	-0.15147	1	0.0424558	1	-0.0679435	1	0.015876	1	0.0526136	1	-0.0133816	1	-0.123332	1	-0.0719136	1	0.209312	1	-0.0626638	0.0106596	0.995276	1	FALSE
Cox5b	-0.0627756	1	0.0318955	1	0.0853426	1	0.0948692	1	-0.0294642	1	0.158309	1	0.0633676	1	0.17691	1	-0.246195	1	0.183896	1	0.0239735	0.0672576	1	1	FALSE
Cox6a1	0.232161	0.0129572	0.191147	1	0.330311	1	0.334287	1	0.337998	3.05694e-23	0.195486	1	0.0421711	1	0.0677753	1	0.0205594	1	0.0980375	1	0.285181	0.0848058	1.76859e-19	1	FALSE
Cox6b1	-0.0920233	1	0.0259203	1	0.109365	1	0.0860009	1	-0.0379223	1	-0.0339965	1	-0.0533251	1	0.0401545	1	0.166558	1	-0.13215	1	0.0182681	-0.00255172	1	1	FALSE
Cox6c	-0.120788	1	0.00865656	1	-0.118728	1	0.18559	1	-0.0145423	1	-0.0278329	1	-0.111194	1	0.144467	1	0.115997	1	0.00285946	1	-0.0119626	0.0248594	1	1	FALSE
Cox7a2	-0.0725849	1	0.166036	1	-0.0108705	1	0.0633449	1	0.00947545	1	-0.129903	1	-0.151201	1	-0.179644	1	0.252104	1	0.0187514	1	0.0310801	-0.0379783	1	1	FALSE
Cox7a2l	0.0738362	1	0.171609	1	0.176308	1	0.251261	1	0.0323787	1	0.163841	0.312592	0.31232	0.029702	0.052847	1	0.051486	1	0.283674	1	0.141079	0.172834	1	0.498424	FALSE
Cox7b	0.111858	1	0.0494606	1	0.0984093	1	0.255412	1	0.0632134	1	0.074946	1	-0.0698887	1	0.00490077	1	-0.0577125	1	-0.000663863	1	0.115671	-0.00968366	1	1	FALSE
Cox7c	-0.108669	1	-0.151972	1	-0.19364	1	0.0168453	1	-0.0430297	1	-0.0778768	1	-0.255976	0.523205	-0.109424	1	-0.112782	1	-0.258825	1	-0.096093	-0.162977	1	0.999444	FALSE
Cox8a	-0.1002	1	-0.0751566	1	0.0880801	1	0.018114	1	0.0996659	0.492042	0.113404	1	0.15641	1	0.218155	1	-0.0179492	1	0.353819	0.72966	0.00610076	0.164768	0.999168	0.99998	FALSE
Cp	0.159996	1	0.74456	1	0.406892	1	0.165444	1	-0.668632	7.17294e-23	0.00387124	1	-0.0338748	1	-0.38141	1	0.204298	1	-0.168009	1	0.161652	-0.0750247	2.18839e-17	1	FALSE
Cpd	0.0389153	1	0.0254407	1	-0.17194	1	0.0701926	1	0.00666515	1	0.0196512	1	0.0763163	1	0.00277035	1	0.290459	1	-0.0283436	1	-0.00614517	0.0721707	1	1	FALSE
Cpe	0.0376286	1	0.0983603	1	0.064854	1	0.106089	1	-0.146983	0.000141862	0.100569	1	0.0201925	1	0.190673	1	-0.256508	1	0.0169595	1	0.0319898	0.0143771	0.0598507	1	FALSE
Cpeb2	-0.0145691	1	-0.0189761	1	-0.0638927	1	-0.046446	1	0.0122831	1	-0.0119892	1	-0.0206136	1	-0.0194611	1	-0.252366	1	-0.037586	1	-0.0263202	-0.0684031	1	1	FALSE
Cpeb4	0.0895353	1	0.0114806	1	-0.0281245	1	-0.00749704	1	0.0653128	1	0.00296289	1	0.0249824	1	-0.039921	1	-0.0476147	1	-0.0149481	1	0.0261415	-0.0149077	1	1	FALSE
Cpne2	-0.0399596	1	-0.040621	1	-0.00234954	1	-0.0369738	1	-0.0597602	0.00668951	0.00861094	1	0.0422412	1	0.00406961	1	-0.00301518	1	-0.0542822	1	-0.0359328	-0.000475121	0.439228	1	FALSE
Cpne3	0.0184487	1	0.0276324	1	-0.0332895	1	0.0997467	1	0.0212549	1	0.0251162	1	-0.222342	1	-0.084943	1	0.0574034	1	-0.0502421	1	0.0267587	-0.0550015	1	1	FALSE
Cpne8	-0.0514027	1	0.0272519	1	-0.0918282	1	0.0263177	1	-0.0153666	1	0.0550236	1	0.00574619	1	0.0249217	1	0.139777	1	0.0131789	1	-0.0210056	0.0477296	1	1	FALSE
Cpox	-0.0503629	1	-0.02519	1	-0.088827	1	-0.0909407	1	-0.0299813	1	-0.044055	1	4.97748e-06	1	-0.486708	1	-0.0787104	1	-0.0215849	1	-0.0570604	-0.126211	1	1	FALSE
Cpped1	-0.00516599	1	-0.0219054	1	-0.0114753	1	-0.0117223	1	-0.00722354	1	-0.0209258	1	-0.0538625	1	0.0723629	1	-0.121755	1	-0.0384062	1	-0.0114985	-0.0325172	1	1	FALSE
Cpsf1	-0.0754621	1	-0.016657	1	-0.0793851	1	-0.126708	1	-0.00313191	1	-0.0130949	1	-0.0212389	1	-0.0263022	1	-0.0199037	1	-0.0588798	1	-0.0602688	-0.0278839	1	1	FALSE
Cpsf2	-0.065713	1	-0.1343	1	-0.141251	1	-0.00969225	1	0.0401126	1	-0.0438925	1	0.0226945	1	-0.0252203	1	0.0470191	1	0.0848308	1	-0.0621688	0.0170863	1	1	FALSE
Cpsf3	-0.0174531	1	-0.0519678	1	-0.0308585	1	0.0196244	1	-0.0433105	1	-0.00950584	1	-0.0436493	1	-0.0182966	1	-0.0663875	1	-0.0460222	1	-0.0247931	-0.0367723	1	1	FALSE
Cpsf4	-0.0309671	1	-0.0427282	1	0.0222919	1	-0.0537246	1	-0.0290582	1	-0.0233282	1	-0.0160169	1	-0.114681	1	-0.106587	1	-0.0175003	1	-0.0268372	-0.0556227	1	1	FALSE
Cpsf6	-0.0845906	1	-0.116346	1	-0.0251401	1	-0.15952	1	-0.156978	2.19286e-07	-0.231319	1	-0.0167614	1	-0.0268644	1	-0.0474727	1	-0.0123608	1	-0.108515	-0.0669557	0.000666107	1	FALSE
Cpsf7	0.0103159	1	-0.0234176	1	0.0909405	1	0.0649073	1	-0.0237136	1	-0.0139768	1	0.0619313	1	0.0210373	1	0.156562	1	-0.0338321	1	0.0238065	0.0383442	1	1	FALSE
Cpt1a	0.0207946	1	-0.0558722	1	0.00270794	1	-0.0349916	1	-0.0113112	1	0.085908	1	0.00849133	1	0.0501515	1	0.224314	1	0.0248348	1	-0.0157345	0.0787399	1	1	FALSE
Cpt2	-0.0114996	1	-0.00219069	1	0.0573167	1	0.111464	1	0.0194435	1	0.0169856	1	-0.007856	1	-0.00640008	1	-0.0584986	1	0.00178065	1	0.0349067	-0.0107977	1	1	FALSE
Cptp	0.028705	1	0.0115749	1	-0.030627	1	-0.00959876	1	0.0173856	1	0.0194054	1	-0.0700502	1	-0.0736457	1	0.0231975	1	0.0193945	1	0.00348795	-0.0163397	1	1	FALSE
Cr1l	-0.0699472	1	-0.054267	1	-0.0110092	1	-0.0585837	1	-0.0751255	0.00340076	-0.107372	1	-0.0127736	1	0.0625275	1	-0.0768761	1	0.0743	1	-0.0537865	-0.0120388	0.329611	1	FALSE
Cracr2b	-0.00127624	1	0.0421764	1	0.0531666	1	-0.0155754	1	0.0125056	1	-0.0403176	1	0.0219179	1	-0.0653548	1	0.0951271	1	0.000276588	1	0.0181994	0.00232985	1	1	FALSE
Cradd	-0.00647812	1	-0.00861809	1	-0.0491479	1	-0.0162639	1	-0.0291111	1	-0.0333172	1	0.00137583	1	-0.0102136	1	-0.0657465	1	0.0224088	1	-0.0219238	-0.0170985	1	1	FALSE
Cramp1l	-0.00471711	1	0.0193817	1	0.00568614	1	-0.0853395	1	-0.0089558	1	0.0461264	1	-0.0196281	1	-0.0590256	1	0.0508144	1	-0.0550059	1	-0.0147889	-0.00734376	1	1	FALSE
Crat	0.0143691	1	0.00327764	1	-0.0310229	1	-0.0481503	1	0.00236378	1	0.0510119	1	0.00783277	1	-0.0485323	1	0.0734682	1	-0.0181031	1	-0.0118325	0.0131355	1	1	FALSE
Crbn	0.00809244	1	0.0155422	1	-0.0297295	1	0.0671484	1	-0.01278	1	-0.000434318	1	-0.215446	1	0.0627791	1	0.227531	1	-0.00587594	1	0.00965471	0.0137106	1	1	FALSE
Crcp	-0.0980942	0.00943325	-0.0969489	1	0.031505	1	0.264711	1	-0.0839028	0.000307296	-0.00612129	1	-0.0708436	1	-0.00563596	1	0.0102943	1	0.00886315	1	0.00345406	-0.0126887	0.00447029	1	FALSE
Creb1	-0.0415419	1	-0.03365	1	-0.0220411	1	0.234092	1	-0.0368427	1	-0.0519723	1	-0.0281313	1	-0.00333071	1	-0.199334	1	-0.0840128	1	0.0200034	-0.0733563	1	1	FALSE
Creb3	-0.03802	1	-0.0229377	1	-0.122492	1	-0.0340962	1	-0.0850179	0.000278095	0.00888768	1	-0.0395137	1	-0.22296	1	-0.172853	1	-0.0102697	1	-0.0605128	-0.0873418	0.0893866	1	FALSE
Creb3l2	-0.0977891	0.00370266	-0.024114	1	-0.126252	1	0.0639738	1	-0.121782	1.31617e-09	-0.0349563	1	0.041804	1	-0.0355634	1	-0.0578201	1	-0.0809636	1	-0.0611927	-0.0334999	1.09606e-07	1	FALSE
Creb5	-0.137289	0.260488	-0.237932	1	-0.303993	1	-0.577907	1	-0.398408	3.68871e-36	-0.0913714	1	-0.124768	1	-0.277855	1	-0.0404135	1	-0.440355	1	-0.331106	-0.194953	1.98865e-30	1	FALSE
Crebbp	0.0502873	1	-0.0341206	1	-0.0986789	1	0.068944	1	-0.0202212	1	-0.196748	1	0.00664116	1	-0.0146074	1	-0.0332355	1	-0.0517859	1	-0.0067579	-0.0579471	1	1	FALSE
Crebrf	0.128716	1	0.0513627	1	0.0254746	1	-0.26788	1	-0.0134682	1	0.0815086	1	0.0762603	1	-0.0449206	1	0.281109	1	0.104832	1	-0.0151591	0.0997579	1	1	FALSE
Crebzf	-0.0400542	1	-0.140272	1	0.0844849	1	-0.288982	1	-0.0533434	1	-0.0414482	1	-0.0200958	1	-0.00349308	1	0.0588985	1	-0.0932216	1	-0.0876333	-0.019872	1	1	FALSE
Creg1	0.0675	1	0.00662602	1	0.0913956	1	-0.0111123	1	0.0718576	1	0.122885	1	0.069927	1	0.0527467	1	0.113542	1	0.081529	1	0.0452534	0.0881259	1	1	FALSE
Creld2	-0.0617601	1	-0.103739	1	-0.145975	1	-0.0615841	1	-0.0441962	1	0.0143045	1	0.00115799	1	-0.145198	1	-0.162259	1	-0.0325079	1	-0.0834508	-0.0649005	1	1	FALSE
Crem	-0.0511773	1	-0.0847596	1	-0.0532717	1	0.0394073	1	-0.0439926	1	-0.0393547	1	0.0618884	1	-0.0409033	1	0.00510252	1	-0.109882	1	-0.0387588	-0.0246299	1	1	FALSE
Crim1	0.139027	0.093695	0.140989	1	0.0451551	1	0.103096	1	0.119728	0.00867628	0.0907003	1	-0.0535204	1	-0.0499059	1	0.0509854	1	0.0461349	1	0.109599	0.0168788	0.162768	1	FALSE
Crip1	-0.371116	2.87386e-05	-0.0632027	1	0.00473734	1	-0.0527054	1	-0.56391	1.53056e-24	-0.0661529	1	0.00321874	1	-0.349318	1	-0.167246	1	-0.0574451	1	-0.209239	-0.127389	3.54486e-23	1	FALSE
Crip2	-0.0638025	1	0.0223999	1	0.143532	1	-0.0399513	1	-0.117249	1.75875e-11	-0.0356003	1	0.0957574	1	0.052333	1	0.00176726	1	0.145817	1	-0.0110143	0.0520148	3.25952e-07	1	FALSE
Cript	-0.00208136	1	-0.0698962	1	0.0164552	1	0.125817	1	0.00881278	1	0.018183	1	0.12167	1	-0.0768879	1	0.0418321	1	-0.112378	1	0.0158216	-0.00151627	1	1	FALSE
Crk	0.00113511	1	0.0418555	1	-0.0318173	1	-0.189719	1	0.0273617	1	-0.105852	1	-0.0121058	1	-0.143511	1	-0.0880337	1	-0.166761	1	-0.0302368	-0.103253	1	1	FALSE
Crkl	-0.017907	1	-0.00413274	1	-0.0937787	1	0.104717	1	-0.0173612	1	-0.0402981	1	-0.0195409	1	-0.030297	1	0.0533158	1	-0.011019	1	-0.00569253	-0.00956784	1	1	FALSE
Crlf1	-0.134236	0.000205252	-0.0050153	1	-0.276533	1	-0.319487	1	-0.30728	9.41805e-39	-0.439501	7.12413e-09	0.111989	1	-0.259012	1	0.357651	1	-0.315095	1	-0.208511	-0.108794	7.14974e-36	4.59982e-05	FALSE
Crlf2	-0.0658355	0.297612	-0.0413964	1	0.28898	1	-0.130205	1	-0.124686	1.45023e-12	-0.0898069	1	-0.0115355	1	-0.00221623	1	-0.0633076	1	-0.0255966	1	-0.0146286	-0.0384926	1.36647e-08	1	FALSE
Crlf3	-0.0323957	1	-0.121028	1	-0.0823946	1	0.0361821	1	-0.0269093	1	-0.00848069	1	-0.0421606	1	0.00600786	1	-0.00307636	1	0.034787	1	-0.0453092	-0.00258456	1	1	FALSE
Crls1	0.0381074	1	-0.0111583	1	0.0655321	1	0.0421092	1	0.0484634	1	0.028691	1	0.0637053	1	-0.0314283	1	-0.0850533	1	0.0512276	1	0.0366108	0.00542847	1	1	FALSE
Crnkl1	0.0393942	1	-0.0748733	1	-0.0322266	1	-0.155616	1	-0.0335675	1	-0.0538445	1	-0.0109255	1	-0.267677	1	0.104551	1	-0.0107899	1	-0.0513778	-0.047737	1	1	FALSE
Crocc	0.0157313	1	-0.00621466	1	0.0284281	1	-0.0385962	1	0.0108574	1	-0.00630205	1	-0.011959	1	0.00619192	1	0.0172783	1	-0.0215998	1	0.0020412	-0.00327813	1	1	FALSE
Crot	-0.0094112	1	0.00840908	1	-0.0159295	1	0.194337	1	-0.0380086	1	-0.0269679	1	0.0153953	1	-0.0460947	1	0.0295213	1	-0.160237	1	0.0278794	-0.0376767	1	1	FALSE
Crtap	-0.0280633	1	-0.0589387	1	0.0482382	1	0.0246521	1	-0.122922	0.00141981	0.0955325	1	0.0396567	1	-0.133909	1	0.0726556	1	-0.094824	1	-0.0274068	-0.00417771	0.217342	1	FALSE
Crtc1	0.0117968	1	-0.0227785	1	-0.0375787	1	-0.0765743	1	-0.0168711	1	0.042092	1	-0.00864699	1	0.0191503	1	0.0921671	1	0.0115687	1	-0.0284012	0.0312662	1	1	FALSE
Crtc2	0.0535789	1	0.0259643	1	0.0016938	1	-0.0536314	1	0.065021	1	-0.0268484	1	-0.180551	1	-0.109582	1	-0.133936	1	-0.0492169	1	0.0185253	-0.100027	1	1	FALSE
Crtc3	-0.0292428	1	-0.0248801	1	-0.0372504	1	0.069697	1	-0.00369889	1	-0.0566664	1	0.0456636	1	-0.0369461	1	0.00898168	1	-0.0457826	1	-0.00507503	-0.01695	1	1	FALSE
Cry1	0.0100646	1	-0.0117755	1	-0.0420879	1	-0.0600316	1	0.0292969	1	0.00142749	1	-0.00185416	1	-0.0572801	1	0.0418806	1	-0.0972827	1	-0.0149067	-0.0226218	1	1	FALSE
Cry2	0.0449011	1	0.00622165	1	0.01672	1	-0.00862453	1	-0.00457852	1	0.0341183	1	0.0357391	1	-0.0213916	1	0.0100438	1	-0.0321488	1	0.0109279	0.00527214	1	1	FALSE
Cryab	-0.111434	1	-0.0939099	1	-0.0336013	1	-0.108577	1	-0.00862961	1	-0.0406961	1	-0.0332921	1	-0.156395	1	-0.0345355	1	0.511491	1	-0.0712305	0.0493146	1	1	FALSE
Crybb3	-0.0110692	1	0.0276957	1	-0.0367948	1	0.0309315	1	-0.0143043	1	-0.00904771	1	-0.0371535	1	-0.0384243	1	-0.0150601	1	-0.00734429	1	-0.000708221	-0.021406	1	1	FALSE
Crybg1	-0.0706035	1	-0.0881965	1	-0.0531316	1	-0.0420504	1	-0.0392787	1	0.0383072	1	0.01636	1	0.0474712	1	0.110581	1	0.0578947	1	-0.0586521	0.0541227	1	1	FALSE
Crybg3	0.0226116	1	-0.00561268	1	0.0226049	1	0.0407403	1	0.0119516	1	-0.0141416	1	0.00286807	1	-0.0113127	1	-0.0176663	1	-0.00615314	1	0.0184591	-0.00928113	1	1	FALSE
Cryz	-0.0416103	0.975921	-0.0001004	1	-0.0315966	1	-0.0346026	1	-0.0618913	0.498081	0.0267494	1	0.00705398	1	0.0328352	1	-0.0238492	1	0.0544502	1	-0.0339603	0.0194479	0.999103	1	FALSE
Cryzl1	-0.00340929	1	0.114149	1	-0.0479952	1	0.167126	1	-0.0762542	0.0228371	-0.0386347	1	0.0504815	1	0.119942	1	0.173609	1	0.0701877	1	0.0307232	0.075117	0.671851	1	FALSE
Cs	-0.0516905	1	-0.154389	0.78778	0.0549516	1	0.0284743	1	-0.0196404	1	-0.141696	1	-0.169045	1	0.00815245	1	-0.0565532	1	-0.0475284	1	-0.0284587	-0.0813341	0.999995	1	FALSE
Csad	-0.0672736	0.210898	-0.0369891	1	0.00320941	1	-0.0553868	1	-0.0840866	2.33963e-06	-0.0612899	1	-0.00668349	1	0.0653116	1	-0.0082141	1	-0.143465	1	-0.0481053	-0.0308682	0.00122586	1	FALSE
Csde1	0.0376808	1	0.0801561	1	-0.0232839	1	-0.171561	1	-0.0353055	1	-0.117268	1	-0.211738	1	-0.228031	1	-0.173676	1	-0.135197	1	-0.0224627	-0.173182	1	1	FALSE
Cse1l	0.019043	1	-0.0119415	1	-0.0428481	1	0.012464	1	0.0254325	1	-0.0928177	1	-0.179129	1	-0.0614771	1	-0.0686766	1	-0.00538694	1	0.000429984	-0.0814974	1	1	FALSE
Csf1	-0.0550143	1	0.0533768	1	-0.16119	1	0.00498204	1	-0.196121	1.11429e-07	-0.220744	1	0.0315227	1	-0.365195	1	-0.144045	1	-0.0283569	1	-0.0707934	-0.145364	0.000397414	1	FALSE
Csf2	-0.437671	0.000184076	0.2659	1	-0.775108	1	-0.538482	1	-0.493701	1.17601e-06	-0.286797	1	-0.28248	1	-0.358554	1	-1.26127	1	-0.587097	1	-0.395812	-0.55524	2.66827e-06	1	FALSE
Csf3	0.190337	1	0.302613	1	-0.565393	1	0.804523	1	0.106601	1	0.366902	1	0.638751	1	1.0232	1	0.65686	1	-0.161891	1	0.167736	0.504765	1	1	FALSE
Csgalnact1	-0.0429401	1	-0.0265178	1	-0.0162376	1	0.070889	1	-0.0582987	1	0.0230884	1	0.0690888	1	-0.0937874	1	-0.0217925	1	0.0333329	1	-0.0146211	0.00198603	1	1	FALSE
Csgalnact2	0.0317681	1	0.0280447	1	0.0327155	1	0.0149603	1	0.0370368	1	0.0206627	1	0.00870739	1	0.106422	1	0.0185125	1	0.0425323	1	0.0289051	0.0393674	1	1	FALSE
Csk	-0.0249868	1	-0.00392043	1	-0.11939	1	0.346588	1	0.0184892	1	-0.0175019	1	-0.0156315	1	-0.0792668	1	-0.0589677	1	-0.0923973	1	0.0433561	-0.052753	1	1	FALSE
Csnk1a1	-0.142366	1	-0.19626	1	-0.430212	0.292191	-0.102071	1	-0.101275	1	-0.389618	1	-0.0674571	1	-0.119207	1	-0.0310972	1	-0.263606	1	-0.194437	-0.174197	0.991436	1	FALSE
Csnk1d	-0.00727713	1	-0.0766286	1	0.018913	1	-0.214096	1	-0.0817305	0.0867097	-0.372989	0.314743	-0.127968	1	-0.222841	1	-0.151865	1	-0.206163	1	-0.0721638	-0.216365	0.898379	0.993341	FALSE
Csnk1e	-0.0896611	1	0.137337	1	0.0191746	1	0.115504	1	-0.107932	0.938061	0.024034	1	-0.121343	1	-0.293351	1	-0.058432	1	-0.211607	1	0.0148845	-0.13214	1	1	FALSE
Csnk1g1	-0.0949274	1	0.0332299	1	-0.0180041	1	0.00255223	1	-0.0403183	1	-0.0532766	1	0.11452	1	0.0498401	1	0.0417298	1	-0.0279997	1	-0.0234935	0.0249628	1	1	FALSE
Csnk1g2	-0.0559173	1	-0.0277816	1	-0.133001	1	0.0342589	1	-0.100478	0.00156096	-0.153761	1	-0.104013	1	-0.109784	1	-0.0155585	1	-0.0171537	1	-0.0565839	-0.0800541	0.2279	1	FALSE
Csnk1g3	0.00485291	1	-0.0909862	1	-0.215365	1	-0.157148	1	0.0499182	1	-0.0483495	1	-0.0317288	1	-0.128041	1	-0.159555	1	-0.0329555	1	-0.0817456	-0.0801259	1	1	FALSE
Csnk2a1	0.0156964	1	-0.0270262	1	-0.0728447	1	-0.0371624	1	-0.0100514	1	-0.120773	1	-0.273952	0.619045	-0.202681	1	-0.241894	1	-0.332023	0.00928841	-0.0262777	-0.234265	1	0.413125	FALSE
Csnk2a2	-0.0420375	1	-0.191746	1	-0.0551695	1	-0.296868	1	0.0783942	1	-0.000950071	1	0.000110625	1	-0.250536	1	0.196399	1	-0.0993023	1	-0.101486	-0.0308557	1	1	FALSE
Csnk2b	-0.0841827	1	-0.183682	1	-0.0299963	1	0.050126	1	-0.13694	2.12793e-05	0.0199729	1	-0.24333	1	-0.015388	1	-0.275361	1	-0.0771925	1	-0.0769351	-0.11826	0.017772	1	FALSE
Cspg5	-0.0193768	1	-0.0620891	1	-0.0211615	1	-0.11449	1	-0.0491654	1	-0.0238202	1	0.00601821	1	0.0260363	1	0.0333129	1	-0.0227648	1	-0.0532566	0.00375649	1	1	FALSE
Cspp1	0.0448233	1	-0.156288	1	-0.10169	1	-0.103382	1	-0.0554575	1	-0.0779027	1	-0.0786035	1	-0.114814	1	0.032158	1	0.0232626	1	-0.0743989	-0.0431799	1	1	FALSE
Csrnp1	-0.0752207	1	0.357734	1	-0.130587	1	0.246495	1	0.0908026	1	-0.301295	1	-0.0305403	1	-0.395908	1	-0.318615	1	-0.441038	1	0.0978448	-0.297479	1	1	FALSE
Csrnp2	0.00957194	1	-0.00443818	1	0.0258446	1	0.00245323	1	-0.0105058	1	-0.00158753	1	-0.00567384	1	0.00599973	1	0.00637815	1	-0.0209059	1	0.00458516	-0.00315788	1	1	FALSE
Csrp1	-0.170609	5.20368e-05	0.0338503	1	-0.146616	1	-0.0408083	1	-0.175264	4.64864e-12	-0.0522093	1	0.0504953	1	-0.313869	1	-0.789059	1	-0.608342	1	-0.0998895	-0.342597	1.88901e-11	1	FALSE
Csrp2	-0.0878431	1	-0.00166039	1	-0.189711	1	0.0664608	1	-0.0426209	1	-0.28486	1	-0.0880442	1	-0.567789	1	-0.204503	1	0.0214139	1	-0.051075	-0.224757	1	1	FALSE
Cst3	0.084701	1	0.417644	0.000382674	0.720077	1	-0.191021	1	-0.212009	0.0151787	0.403726	0.00397286	0.40148	0.000354685	0.166647	1	0.16226	1	0.659706	1	0.163878	0.358764	0.00730764	0.00265693	FALSE
Cstb	-0.0370977	1	-0.0928149	1	-0.171864	1	-0.450416	1	-0.176254	0.0852542	0.104797	1	0.0649673	1	0.238864	1	-0.5441	1	-0.342332	1	-0.185689	-0.0955609	0.896181	1	FALSE
Cstf1	0.000118121	1	-0.0133551	1	0.0281773	1	-0.00696042	1	0.00561895	1	0.0205166	1	0.0245995	1	-0.00532591	1	-0.029612	1	0.0577854	1	0.00271977	0.0135927	1	1	FALSE
Cstf2	-0.00945712	1	-0.0521146	1	-0.0614808	1	-0.0677851	1	0.00429671	1	-0.168912	1	-0.0581385	1	-0.0450166	1	0.0242657	1	-0.0307731	1	-0.0373082	-0.0557148	1	1	FALSE
Cstf2t	0.00106635	1	0.00966908	1	-0.0724963	1	-0.0633171	1	0.0083858	1	-0.00779543	1	0.0267966	1	0.0386126	1	0.0279526	1	-0.0103229	1	-0.0233384	0.0150487	1	1	FALSE
Cstf3	-0.0651195	1	-0.0644477	1	-0.125876	1	-0.0819659	1	-0.00312612	1	-0.0300441	1	-0.0900501	1	-0.0460716	1	0.0435694	1	0.0100359	1	-0.068107	-0.0225121	1	1	FALSE
CT025619.1	-0.0418915	0.115055	-0.0450008	1	-0.398039	1	-0.30468	1	-0.170588	4.60339e-06	-0.024613	1	-0.140916	1	-0.101202	1	-0.145054	1	-0.165832	1	-0.19204	-0.115523	0.00129232	1	FALSE
Ctbp1	-0.0678241	1	-0.0172095	1	-0.188666	1	0.0993953	1	-0.0994324	0.223726	0.00973931	1	-0.162615	1	-0.111816	1	-0.0994455	1	0.00204653	1	-0.0547473	-0.072418	0.981549	1	FALSE
Ctbp2	-0.0614703	1	-0.0444024	1	-0.136223	1	-0.0472432	1	-0.0417456	1	-0.169049	1	-0.290359	1	-0.0841005	1	0.00944572	1	-0.115032	1	-0.0662169	-0.129819	1	1	FALSE
Ctbs	0.0285324	1	0.112274	1	0.0404354	1	-0.07549	1	-0.00313176	1	0.0593651	1	0.0453358	1	0.0633354	1	0.0676672	1	0.054564	1	0.020524	0.0580535	1	1	FALSE
Ctc1	-0.0340683	1	-0.0463967	1	-0.0231527	1	0.000887857	1	-0.00400619	1	0.0252313	1	0.0105997	1	-0.0625975	1	-0.0152579	1	-0.0381053	1	-0.0213472	-0.0160259	1	1	FALSE
Ctcf	0.014506	1	-0.0579479	1	-0.143166	1	0.0752486	1	-0.000460786	1	-0.15317	1	0.0925498	1	-0.0161839	1	0.274119	1	0.109588	1	-0.022364	0.0613805	1	1	FALSE
Ctdnep1	-0.00517377	1	0.0739138	1	-0.110642	1	0.0455809	1	0.0682418	1	0.112485	1	-0.101781	1	-0.00597476	1	0.0891924	1	-0.00111882	1	0.0143841	0.0185606	1	1	FALSE
Ctdp1	0.000511819	1	0.026305	1	-0.0014049	1	0.0160987	1	0.00698994	1	-0.019996	1	0.0234816	1	0.0283704	1	-0.128139	1	-0.0500677	1	0.00970012	-0.0292702	1	1	FALSE
Ctdsp1	0.0242763	1	-0.0144349	1	-0.0200861	1	0.0396681	1	-0.0214446	1	-0.155396	1	-0.0186679	1	0.0273064	1	-0.0248916	1	-0.0118735	1	0.00159576	-0.0367046	1	1	FALSE
Ctdsp2	-0.0249221	1	0.0378634	1	-0.0319787	1	-0.0661471	1	-0.0748376	1	-0.0887197	1	-0.0925406	1	-0.209852	1	0.0567284	1	0.0479332	1	-0.0320044	-0.0572902	1	1	FALSE
Ctdspl	0.0326685	1	-0.0585077	1	0.0513231	1	0.113054	1	-0.0412615	1	0.0140998	1	0.056401	1	-0.0653466	1	0.118105	1	-0.0268157	1	0.0194552	0.0192888	1	1	FALSE
Ctdspl2	0.0712214	1	-0.112224	1	-0.105762	1	-0.0890237	1	-0.0188835	1	0.102758	1	0.0941969	1	-0.107825	1	0.0787667	1	0.0806488	1	-0.0509343	0.0497091	1	1	FALSE
Ctf1	-0.0426418	1	-0.0536682	1	-0.0221327	1	0.0370813	1	-0.0373858	0.0532735	-0.0509183	1	-0.139703	1	0.0727246	1	-0.0259994	1	-0.0149635	1	-0.0237495	-0.0317719	0.826505	1	FALSE
Ctgf	-0.133839	8.00052e-08	-0.125449	1	0.271632	1	-0.383323	1	-0.157867	5.28399e-10	-0.265906	0.0371286	-0.126683	1	-0.201636	1	-0.569727	1	-0.194324	1	-0.105769	-0.271655	3.9684e-12	0.763798	FALSE
Cth	-0.0485082	1.80389e-05	0.00364414	1	-0.165074	0.0440267	-0.0957691	1	-0.0721312	6.60278e-18	-0.0627416	0.0147495	-0.0602491	1	-0.0644298	1	0.0151081	1	-0.0690538	1	-0.0755676	-0.0482732	1.94655e-18	0.586611	FALSE
Ctif	0.0156492	1	0.00188129	1	-0.00516615	1	-0.0317078	1	-0.0203165	1	-0.0167191	1	-0.0488639	1	-0.0325855	1	-0.0100739	1	0.0151745	1	-0.00793199	-0.0186136	1	1	FALSE
Ctla2a	-0.384752	1.89226e-32	-0.0322156	1	-0.366489	1	-0.305345	1	-0.540418	3.18035e-56	-0.244269	2.23734e-06	0.0246233	1	-0.464489	1	-0.0635467	1	0.0285996	1	-0.325844	-0.143816	4.16174e-80	0.00371278	FALSE
Ctnna1	-0.132483	1	0.00620437	1	-0.322305	1	-0.272851	1	-0.229702	6.43903e-13	-0.219169	1	-0.0100616	1	0.0566347	1	0.312835	1	-0.0645088	1	-0.190227	0.015146	1.93055e-08	1	FALSE
Ctnnal1	0.105229	1	0.0802361	1	-0.0300137	1	-0.0328148	1	0.0764245	1	0.171013	1	0.144451	0.0409603	-0.088968	1	0.194038	1	0.00517016	1	0.0398122	0.0851409	1	0.781475	FALSE
Ctnnb1	-0.053532	1	-0.062909	1	-0.0369365	1	0.150329	1	-0.161455	0.00123573	-0.25535	1	-0.303322	1	-0.509489	1	-0.283913	1	-0.280796	1	-0.0329007	-0.326574	0.202563	1	FALSE
Ctnnbip1	-0.0885685	1	-0.0684828	1	0.0591069	1	0.0485785	1	-0.131342	7.61018e-07	-0.00338997	1	0.146046	1	0.0161881	1	0.00215325	1	0.0635006	1	-0.0361416	0.0448997	0.00169097	1	FALSE
Ctnnbl1	-0.0249859	1	-0.0339421	1	0.0733409	1	-0.00849099	1	-0.0600366	1	0.0345336	1	-0.0103121	1	0.013872	1	-0.128206	1	0.0212362	1	-0.0108229	-0.0137753	1	1	FALSE
Ctnnd1	-0.0368985	1	-0.0131034	1	-0.0677175	1	0.179331	1	-0.0533539	1	0.0264132	1	-0.0485006	1	-0.158128	1	-0.00724572	1	-0.109244	1	0.00165146	-0.059341	1	1	FALSE
Ctps	0.0218099	1	-0.132427	1	-0.0874746	1	-0.0266606	1	0.0373743	1	-0.117316	1	-0.113359	1	-0.188037	1	-0.0481817	1	-0.205479	1	-0.0374755	-0.134475	1	1	FALSE
Ctps2	-0.0512536	1	-0.000794287	1	-0.0388712	1	0.00394466	1	-0.119701	2.2894e-10	-0.0292581	1	0.0435342	1	-0.140863	1	-0.158977	1	-0.0433114	1	-0.0413351	-0.0657749	2.79501e-06	1	FALSE
Ctr9	-0.0471461	1	0.00859049	1	-0.081359	1	-0.100298	1	-0.0732708	0.133922	-0.0099914	1	-0.15755	1	-0.142469	1	0.195551	1	-0.0581262	1	-0.0586967	-0.0345171	0.946395	1	FALSE
Ctsa	0.115226	1	0.106703	1	0.0395894	1	0.0438685	1	0.0320802	1	0.153136	1	0.00779801	1	-0.0782699	1	-0.0668733	1	0.145106	1	0.0674933	0.0321793	1	1	FALSE
Ctsb	0.0499788	1	0.302267	1	0.0898913	1	0.231964	1	0.057269	1	-0.00104342	1	-0.00282579	1	0.209283	1	0.0556967	1	-0.0809652	1	0.146274	0.0360291	1	1	FALSE
Ctsc	-0.179261	1.07339e-17	0.056545	1	-0.0318647	1	-0.177474	1	-0.112529	9.34229e-20	-0.0650171	0.00488057	-0.326849	1	-0.182988	1	-0.159938	1	0.0667649	1	-0.0889166	-0.133605	2.0712e-30	0.385837	FALSE
Ctsd	0.152199	1	0.360237	0.836884	0.93704	1	0.75468	1	-0.230553	1	-0.136153	1	0.0330118	1	-0.0940395	1	-0.171157	1	-0.178702	1	0.394721	-0.109408	0.999999	1	FALSE
Ctsh	0.000272246	1	0.366983	0.000561277	0.360251	1	0.525787	1	0.00715488	1	0.237091	1	0.390572	0.00228667	0.181093	1	0.0435424	1	0.299068	1	0.25209	0.230273	0.133138	0.274405	FALSE
Ctsl	-0.452475	0.000818134	-0.173893	1	-0.0594267	1	-0.721451	1	-0.851023	5.66924e-32	0.202465	1	0.260747	1	-0.051486	1	-0.353572	1	-0.125921	1	-0.451654	-0.0135537	7.94567e-29	1	FALSE
Ctso	0.0531285	1	0.152793	1	0.0665443	1	0.0833798	1	0.00620778	1	0.0574422	1	0.0373655	1	-0.0114995	1	-0.124688	1	0.0105496	1	0.0724108	-0.00616595	1	1	FALSE
Ctsz	0.22184	0.00388525	0.239933	0.801863	0.403504	1	0.269926	1	0.122336	1	0.107233	1	0.161501	1	0.00178993	1	-0.186369	1	0.103764	1	0.251508	0.0375838	0.316821	1	FALSE
Cttn	-0.139448	0.557736	0.0280567	1	-0.0718496	1	0.377714	1	-0.27816	4.0151e-17	-0.313431	0.0176793	-0.386522	0.515094	0.407464	1	-0.353683	1	-0.213578	1	-0.0167373	-0.17195	2.24332e-12	0.494837	FALSE
Cttnbp2nl	-0.0175644	1	0.00364856	1	-0.348698	1	-0.286376	1	-0.00964449	1	-0.203622	1	0.0726701	1	-0.222624	1	0.120685	1	-0.0804315	1	-0.131727	-0.0626642	1	1	FALSE
Ctu2	-0.0206808	1	-0.0768279	1	-0.0641718	1	0.165972	1	0.0229843	1	0.0461065	1	-0.00272979	1	-0.0583218	1	0.0179809	1	-0.106455	1	0.00545519	-0.0206839	1	1	FALSE
Ctxn1	-0.298755	2.49123e-22	-0.291291	1.84966e-05	-0.222949	1	-0.0265113	1	-0.399336	2.5593e-71	-0.31774	1	-0.178806	1	0.097293	1	-0.2187	1	-0.321398	1	-0.247768	-0.18787	1.24136e-89	1	FALSE
Cuedc1	-0.018753	1	0.0390904	1	-0.0633531	1	0.175516	1	-0.0393532	1	0.0034747	1	0.0286762	1	-0.0095876	1	0.0115437	1	0.0422377	1	0.0186294	0.0152689	1	1	FALSE
Cuedc2	-0.222804	9.91497e-06	-0.00491108	1	0.0273796	1	0.17708	1	-0.139104	1.8913e-05	-0.01599	1	0.0440806	1	-0.112702	1	0.00706181	1	0.195419	1	-0.0324718	0.0235737	2.36868e-06	1	FALSE
Cul1	0.0668018	1	0.0652682	1	0.0612415	1	0.0701977	1	-0.0408979	1	0.0426865	1	-0.118878	1	-0.0921391	1	0.184312	1	0.00732962	1	0.0445223	0.00466225	1	1	FALSE
Cul2	-0.0421406	1	-0.105643	1	-0.0129135	1	-0.179949	1	-0.0625579	0.217709	-0.045602	1	0.00860528	1	-0.00235247	1	0.116679	1	-0.0492409	1	-0.0806408	0.00561781	0.980243	1	FALSE
Cul3	0.0430001	1	0.0712558	1	-0.139249	1	-0.119435	1	0.0134786	1	-0.1149	1	0.123242	1	-0.1934	1	-0.269459	1	-0.151498	1	-0.02619	-0.121203	1	1	FALSE
Cul4a	0.0364077	1	-0.0414815	1	-0.138773	1	-0.0760342	1	0.0328468	1	0.0308002	1	0.0100899	1	-0.0414303	1	0.117246	1	-0.470362	1	-0.0374068	-0.0707313	1	1	FALSE
Cul4b	-0.051511	1	-0.060031	1	-0.00306979	1	-0.00507683	1	-0.0577585	1	-0.0616296	1	-0.162567	1	0.104549	1	-0.0864023	1	-0.0733956	1	-0.0354894	-0.0558891	1	1	FALSE
Cul5	-0.00623518	1	-0.101175	1	-0.0589521	1	-0.129693	1	-0.014399	1	0.0989973	1	-0.142644	1	-0.135161	1	-0.0317679	1	0.140941	1	-0.0620909	-0.0139268	1	1	FALSE
Cul7	-0.0850563	1	0.0460295	1	-0.105215	1	0.0708399	1	-0.100002	2.50015e-11	-0.225122	1	0.039874	1	-0.0288811	1	0.0687313	1	-0.135859	1	-0.0346807	-0.0562512	4.38684e-07	1	FALSE
Cuta	0.117251	1	0.130078	1	0.125704	1	0.113141	1	0.119482	1	0.139511	1	0.112777	1	0.172724	1	0.134618	1	0.121438	1	0.121131	0.136213	1	1	FALSE
Cux1	0.0663596	1	0.0414607	1	0.0551303	1	0.0894968	1	0.157379	0.130965	0.0145646	1	-0.0730277	1	-0.097853	1	-0.15564	1	-0.115806	1	0.0819653	-0.0855525	0.944337	1	FALSE
Cwc15	0.00866965	1	-0.0565981	1	0.215461	1	0.120441	1	-0.0385984	1	0.0147234	1	0.0230572	1	-0.200656	1	-0.175098	1	0.036552	1	0.049875	-0.0602842	1	1	FALSE
Cwc22	0.0486341	1	-0.0760875	1	-0.107645	1	-0.0463653	1	-0.000269118	1	-0.034792	1	-0.00728826	1	-0.0653383	1	-0.0382157	1	0.0166871	1	-0.0363466	-0.0257894	1	1	FALSE
Cwc25	0.0760187	1	-0.0341976	1	0.0579551	1	0.105617	1	0.0247233	1	-0.0252055	1	-0.101808	1	-0.0510243	1	0.166828	1	-0.0386542	1	0.0460233	-0.00997289	1	1	FALSE
Cwc27	-0.100354	1	-0.0517022	1	0.0368334	1	-0.111596	1	-0.0349652	1	-0.018819	1	-0.0108335	1	0.100442	1	-0.0335852	1	0.0347478	1	-0.0523568	0.0143904	1	1	FALSE
Cwf19l1	6.32973e-06	1	-0.0349895	1	0.0419064	1	-0.00572522	1	-0.00723353	1	0.0118651	1	-0.0757276	1	-0.00864666	1	0.0464265	1	-0.00823492	1	-0.00120712	-0.00686351	1	1	FALSE
Cwf19l2	0.0433729	1	-0.0605237	1	-0.100246	1	0.107862	1	-0.0471131	1	0.0104885	1	-0.0641562	1	0.089819	1	0.147394	1	-0.109329	1	-0.0113295	0.0148432	1	1	FALSE
Cx3cl1	0.0690652	1	0.0474937	1	0.0602453	1	-0.05602	1	0.0628991	1	0.0488935	1	0.116798	1	-0.199779	1	0.0361395	1	0.0240875	1	0.0367367	0.00522783	1	1	FALSE
Cxadr	0.0242906	1	-0.107845	1	0.0610677	1	-0.0564878	1	-0.143611	1.07284e-09	-0.00235157	1	-0.0857182	1	-0.0726409	1	0.0433161	1	-0.018631	1	-0.0445169	-0.0272051	9.96027e-06	1	FALSE
Cxcl1	0.123331	1	0.760119	0.00637798	0.213578	1	0.0916083	1	0.251909	1	-0.335471	1	0.0464963	1	0.147592	1	-1.17147	1	-0.131254	1	0.288109	-0.288822	0.430913	1	FALSE
Cxcl10	-0.409218	0.061513	-0.079625	1	-0.967954	1	-0.433743	1	-0.625548	0.00964327	-0.350014	1	1.15512	1	-0.0687237	1	0.685622	1	-0.315855	1	-0.503218	0.221231	0.13725	1	FALSE
Cxcl16	-0.341292	4.80347e-17	-0.379909	6.23415e-06	-0.467911	0.14937	-0.254675	1	-0.186913	2.59479e-12	-0.37949	2.66066e-06	-0.445471	7.84433e-05	-0.339825	1	-0.553997	1	-0.496217	0.00810167	-0.32614	-0.443	1.89877e-28	4.43137e-08	TRUE
Cxcl2	0.569552	1	0.517103	1	0.406988	1	0.537432	1	0.52441	1	0.226021	1	0.801785	1	0.769195	1	-0.00941321	1	0.387816	1	0.511097	0.435081	1	1	FALSE
Cxcl3	0.151619	1	-0.0457154	1	0.0251115	1	-0.0244245	1	0.0962951	1	0.175123	1	0.277304	1	0.227556	1	0.391579	1	0.663996	1	0.0405772	0.347111	1	1	FALSE
Cxcl5	0.264934	1	0.024835	1	0.594076	1	0.0049125	1	0.089234	1	-0.263635	1	0.0969037	1	-0.0666784	1	0.183348	1	0.0823563	1	0.195598	0.00645896	1	1	FALSE
Cxxc1	-0.0138491	1	-0.0784967	1	-0.107687	1	-0.0369329	1	-0.0240167	1	-0.0399507	1	2.67617e-05	1	-0.0634594	1	-0.011544	1	0.0543934	1	-0.0521965	-0.0121068	1	1	FALSE
Cyb561	0.0846049	1	0.065417	1	0.104434	1	0.289952	1	0.0520431	1	0.0360623	1	0.109446	1	-0.110994	1	0.0441551	1	-0.059646	1	0.11929	0.00380474	1	1	FALSE
Cyb561d2	0.02657	1	0.0113238	1	0.0908869	1	0.0510441	1	0.113452	1	0.0472902	1	0.128057	1	-0.00602109	1	-0.0599657	1	0.0122466	1	0.0586553	0.0243214	1	1	FALSE
Cyb5a	-0.17596	0.00940048	-0.173011	0.631829	-0.481216	0.0159006	-0.188118	1	-0.272941	1.94723e-30	0.046905	1	-0.0323702	1	0.10321	1	-0.0162082	1	-0.0266441	1	-0.258249	0.0149784	2.93918e-28	1	FALSE
Cyb5b	0.00232219	1	-0.153413	1	-0.00018442	1	0.0823927	1	0.0878067	1	-0.30514	1	-0.0786536	1	-0.170804	1	-0.104049	1	0.079034	1	0.00378488	-0.115923	1	1	FALSE
Cyb5d2	0.0242831	1	-0.0105755	1	0.0094128	1	0.0406603	1	0.0197081	1	-0.00688228	1	0.0116056	1	0.0147406	1	-0.00243683	1	0.0108166	1	0.0166978	0.00556875	1	1	FALSE
Cyb5r1	0.0487351	1	0.033901	1	-0.00590405	1	0.0460537	1	0.0401752	1	0.0426703	1	0.0499086	1	-0.0740124	1	0.051854	1	-0.0236945	1	0.0325922	0.0093452	1	1	FALSE
Cyb5r3	0.0350316	1	0.38261	0.000325875	0.262068	1	0.366892	1	0.208898	2.66284e-05	0.0369558	1	0.0306214	1	0.206813	1	0.128295	1	0.20233	1	0.2511	0.121003	5.38424e-05	1	FALSE
Cyb5r4	0.0135827	1	-0.078653	0.810624	-0.0624824	1	0.0639742	1	0.00209882	1	-0.019143	1	-0.0199966	1	-0.088783	1	-0.03315	1	-0.0107042	1	-0.0122959	-0.0343554	0.999997	1	FALSE
Cyba	-0.10408	1	-0.0839617	1	-0.0155208	1	0.168313	1	-0.181481	3.68617e-06	0.329507	0.00801204	0.151045	1	0.000416795	1	-0.0584011	1	0.163557	1	-0.0433461	0.117225	0.00530425	0.47139	FALSE
Cyc1	-0.11261	1	0.00322263	1	0.0670669	1	0.0580708	1	0.0346618	1	0.110496	1	-0.02299	1	0.195899	1	0.00567384	1	0.149807	1	0.0100824	0.0877771	1	1	FALSE
Cycs	-0.245522	1	-0.472423	3.55062e-05	-0.234072	1	-0.287645	1	-0.129318	1	-0.379687	1	-0.638057	1	-0.600954	1	-0.635395	1	-0.218771	1	-0.273796	-0.494573	0.0249312	1	FALSE
Cyfip1	-0.0480616	1	-0.133245	1	-0.24621	1	-0.128606	1	-0.0685038	1	0.0462663	1	0.0621963	1	-0.0308667	1	0.123867	1	-0.1527	1	-0.124925	0.00975245	1	1	FALSE
Cyhr1	0.0551281	1	0.0908381	1	0.0794378	1	-0.0601472	1	-0.0124716	1	0.049891	1	-0.0539156	1	0.0129774	1	-0.050501	1	0.0445129	1	0.030557	0.000592933	1	1	FALSE
Cyld	-0.0828054	0.0899674	-0.143314	0.00771447	-0.193318	1	-0.0384603	1	-0.0615928	0.870368	-0.00646489	1	-0.0258601	1	0.0438346	1	0.0587712	1	-0.0532369	1	-0.103898	0.00340877	0.138626	1	FALSE
Cyp20a1	-0.00650818	1	-0.0827954	1	-0.0450786	1	0.0239302	1	-0.0710939	0.0303281	0.0210092	1	0.06719	1	0.0264117	1	-0.00162982	1	-0.0165948	1	-0.0363092	0.0192773	0.72626	1	FALSE
Cyp2j6	-0.0181603	1	0.00537965	1	-0.00568804	1	-0.00292907	1	-0.0378203	2.79619e-05	-0.00647174	1	-0.0248696	1	-0.0041163	1	0.0116955	1	0.0275423	1	-0.0118436	0.000756045	0.0213084	1	FALSE
Cyp2u1	0.0386305	1	0.00884182	1	0.0257995	1	0.0190096	1	0.048121	1	0.0150563	1	0.0289187	1	-0.00490831	1	-0.0589437	1	-0.00786044	1	0.0280805	-0.00554748	1	1	FALSE
Cyp4f13	-0.00465493	1	-0.026211	1	-0.0156207	1	0.0596781	1	-0.0223048	1	0.00739298	1	0.020959	1	-0.0429401	1	-0.0216378	1	0.0460911	1	-0.00182267	0.00197304	1	1	FALSE
Cyp4f16	-0.0345581	1	-0.0298998	1	-0.0146368	1	-0.00366597	1	-0.0321885	0.0328007	0.0352694	1	-0.042624	1	0.0466808	1	-0.113274	1	0.0117596	1	-0.0229898	-0.0124377	0.740961	1	FALSE
Cyp51	-0.181777	0.9764	-0.173266	1	-0.320788	1	0.00891752	1	0.0638289	1	-0.13112	1	-0.150201	1	-0.323796	1	0.100036	1	0.0103668	1	-0.120617	-0.0989428	1	1	FALSE
Cyr61	-0.333147	0.0590986	-0.143337	1	-0.0990855	1	-0.0281568	1	-0.241692	1	-0.373058	1	-0.179591	1	-1.13303	1	0.148935	1	-0.905584	1	-0.169084	-0.488465	0.843203	1	FALSE
Cystm1	0.201702	1	0.331986	1	-0.0261564	1	0.104105	1	0.7325	1.61322e-50	0.126759	1	0.332815	0.0456855	0.124153	1	-0.149648	1	0.0564699	1	0.268827	0.0981099	1.20303e-43	0.800616	FALSE
Cyth1	-0.00411978	1	-0.0345699	1	-0.0333953	1	0.0895733	1	-0.0243829	1	-0.113658	1	-0.0966522	1	-0.0706572	1	0.00470863	1	-0.0186694	1	-0.00137891	-0.0589856	1	1	FALSE
Cyth2	-0.0428059	1	-0.150395	1	0.0265383	1	-0.196059	1	-0.0871558	1	-0.115037	1	0.0638196	1	0.15896	1	-0.166088	1	-0.114163	1	-0.0899755	-0.0345016	1	1	FALSE
Cyth3	-0.103482	1	-0.0741594	1	-0.245881	1	-0.144102	1	-0.142237	9.00235e-07	-0.0677323	1	-0.24369	1	-0.206388	1	-0.0618121	1	-0.220076	1	-0.141972	-0.15994	0.00191397	1	FALSE
D030025P21Rik	-0.00273001	1	-0.0359726	1	-0.0784591	1	-0.0158718	1	-0.0285465	1	0.0151687	1	-0.0335685	1	-0.0619593	1	0.0278034	1	0.0214513	1	-0.032316	-0.00622088	1	1	FALSE
D030056L22Rik	-0.0223997	1	0.117067	1	0.285886	1	-0.15853	1	0.30399	1.19083e-08	-0.119371	1	-0.267309	1	-0.0923641	1	-0.47302	1	-0.0216881	1	0.105203	-0.19475	6.92611e-05	1	FALSE
D10Jhu81e	0.0421243	1	0.0404785	1	0.0285924	1	0.116376	1	0.0148994	1	0.0428677	1	-0.0109016	1	0.0407895	1	0.0600767	1	0.100578	1	0.0484941	0.046682	1	1	FALSE
D10Wsu102e	-0.0363046	1	-0.156109	1	-0.10699	1	-0.0947523	1	-0.00956839	1	-0.0563848	1	0.0153368	1	-0.0408545	1	0.162976	1	0.0232052	1	-0.0807448	0.0208557	1	1	FALSE
[truncated: 7,632 more rows]

## Sheet: AUCell_JQ1vsVeh
geneset	delta.350_ExptA	adj.p.350_ExptA	delta.473_ExptA	adj.p.473_ExptA	delta.537_ExptA	adj.p.537_ExptA	delta.606_ExptA	adj.p.606_ExptA	delta.684_ExptA	adj.p.684_ExptA	delta.350_ExptB	adj.p.350_ExptB	delta.473_ExptB	adj.p.473_ExptB	delta.537_ExptB	adj.p.537_ExptB	delta.606_ExptB	adj.p.606_ExptB	delta.684_ExptB	adj.p.684_ExptB	fisher_combined_pvalue_ExptA	fisher_combined_pvalue_ExptB	sig.down.both	down.count
IZADPANAH_STEM_CELL_ADIPOSE_VS_BONE_UP	-0.0229721	2.03742e-36	-0.0121033	9.39887e-10	-0.0265803	0.000213283	-0.0229215	0.0055683	-0.020649	7.26486e-56	-0.0131825	3.46514e-06	-0.011293	0.00550834	-0.0178953	0.0284389	-0.0219372	0.0460703	-0.019193	0.00231208	2.46332e-98	2.38134e-09	TRUE	10
MCMURRAY_TP53_HRAS_COOPERATION_RESPONSE_UP	-0.0430374	1.61544e-27	-0.0191841	0.00379692	-0.0423971	0.0279202	-0.0411164	0.0233547	-0.0308706	1.56623e-34	-0.0379813	7.36391e-10	-0.0252275	0.00712674	-0.0672643	0.021752	-0.0578057	0.00740977	-0.0492142	8.49721e-05	1.44713e-59	1.24051e-14	TRUE	10
BEIER_GLIOMA_STEM_CELL_DN	-0.0277306	1.57678e-34	-0.0108142	1.77743e-05	-0.0165596	0.00803501	-0.0338328	0.00818238	-0.0294038	2.56741e-59	-0.0204596	4.87936e-09	-0.0252085	0.000269572	-0.031606	0.000103449	-0.019906	0.262325	-0.023929	0.000616359	5.94185e-94	4.21135e-15	TRUE	9
GAURNIER_PSMD4_TARGETS	-0.00520586	0.000381491	-0.00889884	8.74953e-05	-0.0123936	0.0342377	-0.0343269	8.81048e-05	-0.00457825	1.72435e-05	-0.0165425	9.18484e-08	-0.0199316	5.25343e-07	-0.0352386	0.00156536	-0.0282358	0.223252	-0.00851567	0.0453906	2.23646e-13	1.06519e-13	TRUE	9
HAHTOLA_SEZARY_SYNDROM_DN	-0.00465319	4.88637e-26	-0.00494946	5.28863e-11	-0.0146044	0.00182156	-0.00996863	0.0423327	-0.00603869	5.86793e-40	-0.00368595	4.0988e-07	-0.00115023	0.000929726	-0.00381666	0.0276088	-0.000949808	0.832907	-0.00244859	0.0337259	5.43513e-72	9.84538e-09	TRUE	9
HOSHIDA_LIVER_CANCER_LATE_RECURRENCE_UP	-0.027037	8.33703e-24	-0.0225011	1.09214e-09	-0.0420845	0.000681974	-0.0294706	0.0113898	-0.0303052	1.88209e-47	-0.0290183	5.90454e-13	-0.0180799	1.96903e-05	-0.0190992	0.0284389	-0.0287443	0.140585	-0.0239345	0.000616359	7.87866e-77	9.37382e-18	TRUE	9
KEGG_ALLOGRAFT_REJECTION	-0.00272445	3.62785e-33	-0.0182101	6.21977e-17	0	0.0126728	-0.0417406	8.81048e-05	-0.00823759	1.57895e-80	-0.0238903	1.24132e-28	-0.0399671	7.61568e-15	-0.0437196	0.000106649	-0.0191739	0.0439021	-0.0193538	0.00209137	1.5401e-126	7.03673e-44	TRUE	9
KEGG_ANTIGEN_PROCESSING_AND_PRESENTATION	-0.0292664	1.29048e-37	-0.0383701	1.22975e-16	-0.0235056	0.000401469	-0.0383569	0.000186098	-0.0314664	1.74888e-63	-0.0356482	3.61302e-11	-0.0371413	1.10417e-06	-0.0502616	0.000103449	-0.024457	0.223252	-0.0241266	0.000773879	5.58064e-115	3.0549e-19	TRUE	9
KEGG_GRAFT_VERSUS_HOST_DISEASE	-0.00519187	6.70114e-31	-0.0225923	5.01872e-14	0	0.0302356	-0.0537949	1.18357e-05	-0.00873879	2.86815e-73	-0.0244558	3.35861e-21	-0.0412522	4.03651e-14	-0.0514817	0.000927351	-0.0324749	0.0316012	-0.02754	0.00426138	9.2235e-115	5.72053e-35	TRUE	9
KEGG_SYSTEMIC_LUPUS_ERYTHEMATOSUS	-0.0124703	3.48687e-16	-0.0146359	1.49506e-10	-0.0165318	0.0130136	-0.0269871	0.0365766	-0.010614	5.36056e-27	-0.0120181	1.76649e-08	-0.0176741	2.29382e-05	-0.0268444	0.000103449	-0.01297	0.491462	-0.00609234	0.0196734	1.45863e-48	5.98313e-14	TRUE	9
KEGG_VIRAL_MYOCARDITIS	-0.0117861	1.5484e-16	-0.0190633	2.04566e-12	-0.0188111	0.00699515	-0.0226372	0.0225755	-0.011294	1.12652e-18	-0.0156431	5.9232e-11	-0.0179806	6.51174e-06	-0.0272754	2.59213e-07	-0.0125551	0.573518	-0.0142036	0.00099182	4.02335e-43	2.90164e-20	TRUE	9
KUNINGER_IGF1_VS_PDGFB_TARGETS_UP	-0.00858905	7.85552e-26	-0.00438934	0.000894486	-0.00759629	0.00184349	-0.00477417	0.283453	-0.00934757	1.47185e-36	-0.0111825	1.31985e-21	-0.00977144	1.61012e-12	-0.0108646	0.0376947	-0.014936	0.00667677	-0.0109204	1.66676e-05	1.33011e-60	3.09437e-35	TRUE	9
LIU_VAV3_PROSTATE_CARCINOGENESIS_UP	-0.0415149	1.13178e-48	-0.0241654	4.34588e-12	-0.0402098	7.18081e-06	-0.0382843	0.000557807	-0.0452008	4.78025e-90	-0.026542	7.40818e-10	-0.014276	0.0264137	-0.0267152	0.00675874	-0.0193274	0.664643	-0.0230052	0.000318554	6.78118e-149	2.742e-12	TRUE	9
MORI_IMMATURE_B_LYMPHOCYTE_UP	-0.019894	1.65843e-28	-0.0202888	2.70792e-13	-0.0242069	0.000681974	-0.0368571	8.81048e-05	-0.0194308	2.32045e-46	-0.0166138	8.01995e-06	-0.0217771	1.08036e-06	-0.0296891	0.00180605	-0.0241537	0.205705	-0.0142903	0.000930051	5.63876e-86	3.66001e-13	TRUE	9
MORI_LARGE_PRE_BII_LYMPHOCYTE_DN	-0.0171144	1.0339e-19	-0.00893818	0.000296538	-0.0224483	0.00418944	-0.0206824	0.00898023	-0.0212751	1.94172e-52	-0.0106738	0.000238693	-0.0112181	0.00268354	-0.017707	0.0116873	-0.0155058	0.394008	-0.0136189	0.0242562	1.02631e-71	1.06109e-06	TRUE	9
RASHI_RESPONSE_TO_IONIZING_RADIATION_6	-0.0140393	3.70268e-30	-0.0128604	3.52234e-09	-0.0197884	0.000359268	-0.0136561	0.0115148	-0.0112481	4.69685e-29	-0.00865272	2.85021e-05	-0.00582403	0.0295425	-0.0123146	0.0364468	-0.002008	0.996824	-0.00901933	0.00329291	7.99175e-65	1.41224e-06	TRUE	9
REACTOME_GENERATION_OF_SECOND_MESSENGER_MOLECULES	-0.00853811	6.04129e-11	-0.0133275	5.93707e-09	-0.0139278	0.0426803	-0.0282825	0.00887997	-0.0123136	8.73125e-35	-0.015422	4.25265e-14	-0.0226127	3.89817e-08	-0.0346594	2.59213e-07	-0.0202113	0.0945606	-0.0111663	0.0910876	1.40315e-49	3.45354e-24	TRUE	9
SANA_RESPONSE_TO_IFNG_UP	-0.0253929	1.51077e-40	-0.0209635	3.01634e-13	-0.0275771	0.00014648	-0.0454072	4.97476e-06	-0.0228669	3.03168e-67	-0.0253929	9.45667e-21	-0.023515	1.12978e-08	-0.0349255	0.00123436	-0.0197693	0.460507	-0.0203205	0.00687617	3.20832e-120	6.40044e-28	TRUE	9
VALK_AML_CLUSTER_6	-0.0310904	3.94656e-37	-0.0268756	1.20089e-12	-0.0302722	0.000261578	-0.0395696	0.00162475	-0.0266153	2.58817e-60	-0.0291194	4.51522e-17	-0.0254624	9.53438e-07	-0.0336689	0.000977243	-0.0286235	0.0794313	-0.0111816	0.0289063	1.05756e-106	7.42194e-23	TRUE	9
WIELAND_UP_BY_HBV_INFECTION	-0.0329736	3.76532e-43	-0.0274413	3.65142e-12	-0.039558	0.000116992	-0.0315071	0.00406291	-0.0339708	2.22432e-71	-0.0259785	9.40716e-08	-0.0204939	0.000689357	-0.0531375	0.00404253	-0.0226863	0.513367	-0.0107272	0.0433377	5.05617e-123	3.17987e-10	TRUE	9
WP_ALLOGRAFT_REJECTION	-0.0063839	3.96212e-11	-0.00819038	8.55347e-09	-0.00725532	0.0957357	-0.020591	0.00836251	-0.00375005	6.59084e-09	-0.0162339	1.62947e-17	-0.0212813	1.88059e-12	-0.0282478	0.000927351	-0.0172326	0.0460703	-0.0147358	0.000585977	1.74024e-24	1.60485e-30	TRUE	9
WP_STRIATED_MUSCLE_CONTRACTION_PATHWAY	-0.0243897	2.59331e-39	-0.0184492	1.92742e-12	-0.0259813	0.000116992	-0.0161851	0.0365766	-0.0228653	6.20095e-63	-0.0296129	6.41057e-25	-0.0212737	1.12978e-08	-0.00950481	0.0546077	-0.0284808	0.00740977	-0.0251967	1.0509e-05	3.04401e-110	1.01461e-34	TRUE	9
WUNDER_INFLAMMATORY_RESPONSE_AND_CHOLESTEROL_UP	-0.0516078	1.30697e-56	-0.0452254	2.65405e-20	-0.0640827	7.18081e-06	-0.0582127	8.81048e-05	-0.0505829	6.0524e-98	-0.0307628	8.53006e-10	-0.0273775	2.70841e-05	-0.0516078	0.000103449	-0.0251879	0.585142	-0.0316169	0.000425847	1.71867e-173	1.53893e-16	TRUE	9
AKL_HTLV1_INFECTION_DN	-0.0102541	4.14838e-08	-0.00926839	0.000761763	-0.0148317	0.00124725	-0.0186841	0.0233547	-0.0112059	3.90455e-22	-0.012186	1.36693e-05	-0.0151319	0.000277713	-0.0160667	0.052746	-0.0183045	0.0749825	-0.0157721	0.0095695	7.79324e-31	5.26413e-09	TRUE	8
BAUS_TFF2_TARGETS_UP	-0.0385297	7.74684e-53	-0.0317768	5.34386e-12	-0.0329262	3.81555e-05	-0.0332854	0.000685993	-0.0390805	2.83983e-84	-0.0213841	2.64276e-08	-0.0116858	0.231955	-0.0193008	0.0317363	-0.00900383	0.880288	-0.0110872	0.0693128	2.07751e-146	2.33663e-07	TRUE	8
BOGNI_TREATMENT_RELATED_MYELOID_LEUKEMIA_DN	-0.00740998	0.000334683	-0.0196596	1.52728e-06	-0.0221836	0.00449087	-0.0199143	0.0365766	-0.0165219	2.18562e-27	-0.0108603	0.000118115	-0.0092509	0.0274765	-0.014079	0.096036	0.00846359	0.57085	-0.00786153	0.276419	5.60087e-34	0.000211217	TRUE	8
BOQUEST_STEM_CELL_DN	-0.00928754	5.6679e-21	-0.00478977	2.47584e-05	-0.00947472	0.000816391	-0.0127166	0.00406291	-0.0102627	3.70952e-43	-0.00728292	2.06708e-06	-0.00672701	0.00506882	-0.00586227	0.0619319	-0.00430686	0.454233	-0.00648556	0.0099096	5.80654e-66	7.07869e-08	TRUE	8
BROWNE_INTERFERON_RESPONSIVE_GENES	-0.0348015	1.78075e-45	-0.0238361	3.63953e-08	-0.0367586	0.000122601	-0.0292066	0.0115148	-0.0317738	2.86815e-73	-0.023013	4.27576e-10	-0.0134808	0.1033	-0.0387733	0.0165619	-0.0165661	0.789737	-0.0186326	0.0331853	9.05673e-123	9.05903e-10	TRUE	8
DAIRKEE_CANCER_PRONE_RESPONSE_E2	-0.0236399	1.1575e-23	-0.0221858	1.33966e-07	-0.0122469	0.209029	-0.0239067	0.0256414	-0.0204915	1.32233e-36	-0.0185037	2.01871e-11	-0.0196243	1.34078e-07	-0.014328	0.151418	-0.0346594	0.00740977	-0.0194642	0.00220145	2.81721e-61	2.43781e-18	TRUE	8
DER_IFN_BETA_RESPONSE_UP	-0.0286271	2.60969e-33	-0.0238981	2.41755e-08	-0.042814	5.70558e-06	-0.0225405	0.0277927	-0.0321154	5.98698e-73	-0.0178538	0.000111418	-0.0131118	0.389894	-0.019507	0.0231944	0.0013284	0.972946	-0.0221118	0.0095695	1.43826e-111	5.72942e-05	TRUE	8
GAUSSMANN_MLL_AF4_FUSION_TARGETS_D_UP	-0.0198558	7.75385e-32	-0.0185089	1.22975e-16	-0.0184437	0.0923076	-0.025265	0.00898023	-0.0220607	1.84116e-58	-0.0224844	5.40688e-16	-0.00997132	6.08036e-07	-0.0285019	0.00123436	-0.017314	0.204805	-0.00924357	0.0449065	2.3426e-100	2.27977e-21	TRUE	8
GRAESSMANN_APOPTOSIS_BY_SERUM_DEPRIVATION_UP	-0.00819789	9.35877e-22	-0.00444977	0.000967001	-0.0142784	0.000176962	-0.00842143	0.163439	-0.00852388	1.3033e-43	-0.0105528	1.12961e-11	-0.00730142	0.00362181	-0.0119437	0.00261168	-0.00765923	0.763175	-0.00924882	0.000736466	1.06812e-64	1.0531e-14	TRUE	8
GRAHAM_CML_QUIESCENT_VS_NORMAL_QUIESCENT_DN	-0.0204235	9.62821e-13	-0.0206468	6.47094e-06	-0.0230144	0.0819158	-0.0355758	0.0396397	-0.0254981	1.89272e-30	-0.019539	3.16404e-05	-0.030528	0.000107166	-0.0361476	0.000106649	-0.016555	0.810646	-0.0290896	0.00187894	2.77109e-43	3.93164e-11	TRUE	8
HENDRICKS_SMARCA4_TARGETS_DN	-0.0167306	3.11944e-10	-0.0117811	0.00116379	-0.0269432	0.0362075	-0.0340014	0.00898023	-0.011511	1.20331e-08	-0.0151098	3.30738e-05	-0.0112931	0.058572	-0.0370687	0.00795882	-0.013977	0.693139	-0.0212443	0.00391346	5.7949e-19	6.76456e-07	TRUE	8
ICHIBA_GRAFT_VERSUS_HOST_DISEASE_D7_UP	-0.0357759	2.84915e-33	-0.0203937	6.6146e-07	-0.0428448	0.000311261	-0.0324713	0.0480793	-0.0349368	8.26274e-56	-0.0131523	0.0015339	-0.0103362	0.410822	-0.0221379	0.0243972	-0.0235603	0.890952	-0.0145833	0.0306817	2.6293e-91	0.00108735	TRUE	8
KEGG_AUTOIMMUNE_THYROID_DISEASE	0	5.61891e-34	-0.0175658	1.65504e-17	0	0.0126728	-0.0366688	8.81048e-05	-0.00785937	1.57895e-80	-0.0224376	5.93203e-29	-0.0368052	1.0954e-14	-0.0421729	0.000106649	-0.0184956	0.0358657	-0.0186691	0.00115792	6.61209e-128	2.27703e-44	TRUE	8
KEGG_INTESTINAL_IMMUNE_NETWORK_FOR_IGA_PRODUCTION	-0.00906239	1.01291e-12	-0.0161816	4.94105e-10	-0.00609969	0.207897	-0.0304287	0.000557807	-0.00829557	2.03461e-25	-0.0180289	3.26191e-15	-0.0276316	5.12108e-12	-0.0320843	0.000199068	-0.0188742	0.0790888	-0.0111711	0.00441806	8.90159e-44	1.68912e-27	TRUE	8
KEGG_TYPE_I_DIABETES_MELLITUS	-0.0128225	9.91097e-12	-0.0218902	6.02121e-14	-0.00481966	0.09389	-0.0421888	8.81048e-05	-0.016824	1.64352e-41	-0.018225	5.90454e-13	-0.0276065	9.73789e-10	-0.0360241	0.0111905	-0.0220807	0.0790888	-0.01419	0.00378156	2.35136e-63	1.22659e-21	TRUE	8
LEE_LIVER_CANCER_MYC_E2F1_UP	-0.0244041	9.26235e-19	-0.00856852	0.0400048	-0.0192379	0.00699515	-0.0286058	0.0115727	-0.0314465	1.57194e-54	-0.0214709	4.29202e-05	-0.0158092	0.0133941	-0.0205988	0.151532	-0.0108808	0.844886	-0.0231357	0.00927113	2.01965e-70	6.8775e-06	TRUE	8
LI_WILMS_TUMOR	-0.0164373	3.1563e-18	-0.0138237	5.00768e-10	-0.0207828	0.00456426	-0.0112416	0.0378302	-0.0172718	2.87098e-45	-0.0180433	6.72157e-08	-0.00958844	0.00690315	-0.017382	0.328746	-0.0148156	0.3466	-0.0205939	8.49721e-05	2.98886e-68	2.52569e-10	TRUE	8
NAKAYAMA_SOFT_TISSUE_TUMORS_PCA2_DN	-0.00542534	3.39799e-18	-0.00151888	0.00746059	-0.01084	0.000681974	-0.00716273	0.00818238	-0.00499899	5.80037e-21	-0.00527612	5.08437e-07	-0.00402903	0.000640182	-0.00254746	0.127943	-0.000767435	0.98327	-0.00343747	0.0462498	4.12864e-39	4.88391e-08	TRUE	8
REACTOME_ANTIVIRAL_MECHANISM_BY_IFN_STIMULATED_GENES	-0.00831566	1.0286e-07	-0.0155046	7.36407e-11	-0.0172322	0.00496269	-0.0137063	0.122238	-0.0100742	1.63731e-18	-0.014179	3.50431e-12	-0.0103261	0.000689357	-0.0195475	0.000977243	-0.009924	0.564404	-0.0109977	0.0196734	1.94921e-32	4.94221e-15	TRUE	8
REACTOME_COSTIMULATION_BY_THE_CD28_FAMILY	-0.00683281	3.70626e-11	-0.00964666	2.1266e-09	-0.00594361	0.503464	-0.0159705	0.0365766	-0.00796186	7.43717e-24	-0.00879256	8.49882e-09	-0.00806716	0.00080587	-0.0185211	0.00391311	-0.0147128	0.205705	-0.00349245	0.0340898	4.91677e-38	1.50802e-11	TRUE	8
REACTOME_DOWNSTREAM_SIGNAL_TRANSDUCTION	-0.014751	3.67982e-11	-0.00912356	0.0153075	-0.0248803	0.000240502	-0.0126916	0.261233	-0.0107639	2.61291e-08	-0.0222701	5.97851e-12	-0.014727	0.0007985	-0.0216236	0.00701021	-0.0125479	0.988357	-0.0268319	4.6244e-05	3.88964e-19	3.66227e-16	TRUE	8
REACTOME_E3_UBIQUITIN_LIGASES_UBIQUITINATE_TARGET_PROTEINS	-0.00694907	0.00205981	-0.00865461	0.000412845	-0.00805965	0.264261	-0.00387117	0.662733	-0.0102808	1.392e-15	-0.0175472	1.40018e-09	-0.0134142	0.000130675	-0.0238775	0.00261168	-0.0251547	0.00777749	-0.0183563	0.000587122	5.82458e-17	5.0746e-16	TRUE	8
REACTOME_IKK_COMPLEX_RECRUITMENT_MEDIATED_BY_RIP1	-0.00603482	0.00264563	-0.0163567	0.000167665	-0.0200501	0.0310772	-0.00798048	0.713046	-0.010767	6.45619e-15	-0.0256068	2.57421e-10	-0.0238755	9.87305e-06	-0.0201491	0.0739968	-0.0243042	0.037867	-0.0324001	9.87026e-07	1.95441e-17	2.55372e-18	TRUE	8
REACTOME_INFECTIOUS_DISEASE	-0.00690219	2.342e-14	-0.00858303	2.13537e-09	-0.00529263	0.0353061	-0.0021085	0.558647	-0.00594643	1.27132e-16	-0.00749509	2.4145e-06	-0.00588293	0.0244107	-0.0073791	0.00409704	-0.00586544	0.252891	-0.00876317	0.0109492	3.89073e-34	1.99438e-08	TRUE	8
REACTOME_INTERFERON_SIGNALING	-0.0148698	4.39889e-26	-0.0100833	1.08087e-08	-0.021713	3.52842e-05	-0.0135242	0.0159655	-0.0116019	6.63478e-42	-0.0127104	7.85467e-10	-0.00720422	0.06522	-0.0232039	0.000106649	-0.00354337	0.915707	-0.0143209	0.00189547	9.04329e-74	1.03554e-12	TRUE	8
REACTOME_PROTEIN_UBIQUITINATION	-0.0058098	0.000600062	-0.0106243	0.000118616	-0.0090555	0.350259	-0.0101158	0.601093	-0.0117062	1.67924e-18	-0.0129233	2.77192e-07	-0.011268	0.000278987	-0.0248296	0.00404253	-0.0208374	0.00740977	-0.00810884	0.0455329	1.35614e-20	8.99999e-12	TRUE	8
REACTOME_STRIATED_MUSCLE_CONTRACTION	-0.0248697	1.36041e-37	-0.021049	8.58131e-11	-0.030844	6.4485e-06	-0.015862	0.068787	-0.0234688	2.65739e-65	-0.0300104	2.99395e-24	-0.0256107	3.89817e-08	-0.0137316	0.0791745	-0.0238393	0.0112243	-0.0262475	1.29238e-05	3.15651e-110	3.75057e-33	TRUE	8
SERVITJA_LIVER_HNF1A_TARGETS_DN	-0.00555879	8.08103e-15	-0.00437005	0.00119683	-0.0111346	0.00284713	-0.00367379	0.566366	-0.00442666	1.23274e-17	-0.00838631	7.36391e-10	-0.00656074	0.00116558	-0.0094307	0.014238	-0.00651545	0.688916	-0.00842593	0.00282075	4.29283e-31	2.36486e-12	TRUE	8
VILIMAS_NOTCH1_TARGETS_UP	-0.0133372	1.24657e-11	-0.0100715	0.00467101	-0.0184278	0.0167876	-0.0115397	0.264381	-0.00745757	9.64968e-06	-0.0113544	3.04488e-06	-0.00764281	0.0100862	-0.0141056	0.0291531	-0.00379396	0.96821	-0.0128981	0.0376258	5.73615e-16	5.48837e-07	TRUE	8
YAUCH_HEDGEHOG_SIGNALING_PARACRINE_DN	-0.00346441	1.6155e-18	-0.0028444	3.9533e-05	-0.00417407	0.0207083	-0.00336139	0.0300366	-0.00370287	1.94003e-48	-0.00403863	1.80808e-17	-0.00626111	8.73865e-14	-0.00326982	0.140108	-0.00196494	0.34109	-0.0036857	0.000869467	2.6417e-66	1.10529e-28	TRUE	8
APRELIKOVA_BRCA1_TARGETS	-0.0277301	1.13503e-20	-0.0201142	9.89798e-08	-0.0155659	0.0329438	-0.0293702	0.311725	-0.0232198	1.92024e-20	-0.0230451	8.06916e-06	-0.0119592	0.14683	-0.0280035	0.0317363	-0.0235994	0.579847	-0.0314735	0.00378156	1.50745e-42	1.19471e-06	TRUE	7
AZARE_STAT3_TARGETS	-0.0283829	2.51635e-11	-0.0163156	0.000247686	-0.0314261	0.0347084	-0.024255	0.688953	-0.0358101	1.21197e-36	-0.0195848	5.38461e-05	-0.018711	0.0799753	-0.0395613	0.00630814	0.012248	0.981173	-0.0257164	0.0677976	1.56875e-45	1.52288e-05	TRUE	7
BASSO_CD40_SIGNALING_UP	-0.0150064	6.90538e-11	-0.00612094	0.028011	-0.0175418	0.0957357	-0.0135172	0.283453	-0.00759485	8.07643e-08	-0.010768	0.00135564	-0.0102143	0.0455699	-0.015625	0.0128641	-0.014888	0.44971	-0.0158847	0.00657609	9.33139e-16	1.8846e-05	TRUE	7
BENNETT_SYSTEMIC_LUPUS_ERYTHEMATOSUS	-0.0229326	7.2468e-24	-0.0114439	0.0128498	-0.025802	0.00803501	-0.0285817	0.155397	-0.0219126	5.26481e-37	-0.0325383	4.23516e-10	-0.0204107	0.0448601	-0.0405075	0.122097	0.00295904	0.983858	-0.018763	0.0348461	1.25265e-57	3.14515e-09	TRUE	7
BLANCO_MELO_RESPIRATORY_SYNCYTIAL_VIRUS_INFECTION_A594_CELLS_DN	-0.00414931	5.50536e-15	-0.000849858	0.0159156	-0.00439093	0.154921	-0.00284119	0.420098	-0.00467422	2.2242e-27	-0.00572821	3.16321e-13	-0.00440343	1.72093e-06	-0.0041743	0.0422239	-0.0010165	0.685327	-0.000845692	0.303303	5.74093e-38	1.04122e-15	TRUE	7
BORCZUK_MALIGNANT_MESOTHELIOMA_DN	-0.00610299	4.17002e-05	-0.0101062	0.000141124	-0.0262979	0.00095143	-0.0104074	0.108176	-0.0125159	1.82141e-20	-0.00736899	5.69632e-06	-0.0108658	7.43818e-05	-0.0148602	0.0772114	0.00178986	0.981173	-0.016781	0.00112766	1.42401e-26	1.58119e-09	TRUE	7
BROWNE_HCMV_INFECTION_10HR_UP	-0.0110746	3.25061e-10	-0.009941	0.000183326	-0.0151622	0.0096314	-0.00702065	0.506066	-0.00525495	2.59509e-08	-0.00916561	0.000212262	0.00117573	0.933451	-0.00935525	0.00857427	0.00224189	0.981173	-0.00586178	0.0770218	2.72446e-18	0.000443	TRUE	7
DER_IFN_GAMMA_RESPONSE_UP	-0.0368328	5.63684e-31	-0.0188848	7.35505e-06	-0.0358872	0.000246904	-0.0295688	0.111131	-0.0347384	9.46025e-63	-0.0167374	0.000941341	-0.00786497	0.742908	-0.0300636	0.0240687	-0.000273948	0.991889	-0.0108519	0.045984	1.38621e-94	0.00170196	TRUE	7
DIRMEIER_LMP1_RESPONSE_LATE_UP	-0.00764477	8.05517e-05	-0.00477161	0.0327593	-0.009505	0.144756	-0.010295	0.280724	-0.0033637	0.0269644	-0.00861311	0.0027194	-0.00855577	0.0278116	-0.0133529	0.0173766	-0.0153533	0.427541	-0.00385424	0.329046	2.22856e-05	0.000585148	TRUE	7
FLECHNER_BIOPSY_KIDNEY_TRANSPLANT_REJECTED_VS_OK_UP	-0.0163768	1.40917e-35	-0.00443272	0.0278046	-0.0198107	0.000116992	-0.0064714	0.158438	-0.0164852	1.0405e-64	-0.00856245	4.71716e-05	-0.00604122	0.0397516	-0.00899263	0.151532	-0.00776568	0.96821	-0.00938166	0.0403249	1.09892e-97	6.54708e-05	TRUE	7
GARGALOVIC_RESPONSE_TO_OXIDIZED_PHOSPHOLIPIDS_PINK_DN	-0.00395971	0.000232016	-0.00928563	0.000120279	-0.0218826	0.0128344	-0.0205395	0.0332883	-0.00387866	7.27367e-09	-0.00845201	0.000342458	-0.00485122	0.197306	-0.0276485	0.122964	-0.00423758	0.880288	-0.0142179	0.00749883	1.472e-14	0.000229899	TRUE	7
GRAESSMANN_RESPONSE_TO_MC_AND_SERUM_DEPRIVATION_UP	-0.0129223	9.07614e-33	-0.00401536	0.00622104	-0.0167698	0.000116992	-0.00776802	0.0861866	-0.0128209	1.11307e-57	-0.0144487	1.21296e-12	-0.00730081	0.0842995	-0.0149674	0.0169532	-0.0103369	0.844886	-0.0081521	0.00533287	6.47258e-89	8.69479e-13	TRUE	7
GUTIERREZ_CHRONIC_LYMPHOCYTIC_LEUKEMIA_DN	-0.00945047	3.1799e-11	-0.00609838	0.00419304	-0.0150642	0.00467153	0.00285399	0.84275	-0.0059503	5.41726e-09	-0.0117929	4.31504e-08	-0.00592337	0.0904156	-0.0180528	0.00870184	-0.00881102	0.196015	-0.0102178	0.00066525	1.10366e-18	2.49319e-10	TRUE	7
HOFFMANN_SMALL_PRE_BII_TO_IMMATURE_B_LYMPHOCYTE_UP	-0.0113022	8.38052e-16	-0.00857026	7.13198e-06	-0.0035685	0.427299	-0.0153387	0.0138365	-0.0120803	1.28879e-34	-0.00571546	0.00209463	-0.0046098	0.0133111	-0.010764	0.143776	-0.0116942	0.401884	-0.00556336	0.142579	5.54475e-50	0.000689947	TRUE	7
LEE_CALORIE_RESTRICTION_MUSCLE_DN	-0.0106298	2.38217e-12	-0.0102566	0.000329326	-0.0107272	0.410612	-0.0161963	0.425117	-0.00841461	8.36272e-09	-0.0181681	1.37303e-11	-0.0133887	0.0320304	-0.015677	0.0165619	-0.00426005	0.915707	-0.0132508	0.0961759	4.74452e-19	4.50224e-11	TRUE	7
LENAOUR_DENDRITIC_CELL_MATURATION_UP	-0.0110654	7.56364e-18	-0.00365419	0.00420392	-0.00976964	0.0647675	-0.0102153	0.100614	-0.0118607	2.88577e-33	-0.0108015	9.16816e-07	-0.0063177	0.00682434	-0.00342109	0.262997	-0.0132764	0.0460703	-0.0127691	0.000388087	6.25291e-48	1.31875e-09	TRUE	7
LIU_NASOPHARYNGEAL_CARCINOMA	-0.0114802	5.0496e-16	-0.00912223	6.68857e-05	-0.0129402	0.0150081	-0.00936906	0.0430663	-0.0143634	4.21047e-38	-0.0110023	1.7717e-05	-0.00355541	0.395959	-0.012331	0.220742	-0.0041436	0.862445	-0.0032193	0.661532	1.43998e-53	0.00188772	TRUE	7
MORI_MATURE_B_LYMPHOCYTE_UP	-0.00781536	1.82093e-05	-0.00253291	0.248246	-0.0215214	0.024371	-0.005974	0.175311	-0.00708215	1.55672e-09	-0.0104983	7.44802e-06	-0.00676137	0.00110506	-0.0212798	0.00123436	-0.0152641	0.675635	-0.0144851	0.0265246	2.92283e-12	6.46716e-09	TRUE	7
REACTOME_CYTOKINE_SIGNALING_IN_IMMUNE_SYSTEM	-0.0118807	1.09154e-26	-0.00992257	1.59196e-09	-0.0147927	0.000180138	-0.00877798	0.254099	-0.00853462	4.0588e-31	-0.00848763	5.7956e-05	-0.00399975	0.254292	-0.0112369	0.00660274	-0.00531266	0.810646	-0.0138985	0.00133955	9.04207e-63	1.4697e-06	TRUE	7
REACTOME_DISEASES_OF_SIGNAL_TRANSDUCTION_BY_GROWTH_FACTOR_RECEPTORS_AND_SECOND_MESSENGERS	-0.00931677	3.33481e-26	-0.0101531	5.64698e-11	-0.00902803	0.000240502	-0.0077982	0.0936733	-0.0115059	1.21899e-46	-0.00707955	9.68532e-05	-0.00344032	0.176408	-0.00717152	0.00701021	-0.00442632	0.664643	-0.0115797	0.00143173	3.42633e-79	1.56543e-06	TRUE	7
REACTOME_DNA_DOUBLE_STRAND_BREAK_RESPONSE	-0.00318896	0.0191218	-0.00809932	2.79416e-05	-0.0108044	0.047554	-0.00242742	0.824107	-0.00277646	0.00142069	-0.00942408	3.42722e-06	-0.0078772	0.00938657	-0.00737744	0.121954	-0.00197525	0.983858	-0.0107885	0.00426974	5.07893e-07	3.0852e-07	TRUE	7
REACTOME_FANCONI_ANEMIA_PATHWAY	-0.00351924	0.0236565	-0.00642211	0.0017679	-0.00536833	0.522607	-0.00230639	0.707217	-0.00439407	0.000242249	-0.0117507	4.23516e-10	-0.0167015	3.20514e-08	-0.0178149	0.0240687	-0.003221	0.810646	-0.0182424	5.22159e-05	2.74537e-05	4.77883e-18	TRUE	7
REACTOME_FLT3_SIGNALING	-0.00429284	0.0161456	-0.00675832	0.00531086	-0.0056271	0.683085	-0.00237847	0.794605	-0.00301659	0.0239663	-0.0140968	3.74929e-10	-0.0130816	4.40655e-05	-0.0267819	0.00156536	0.000454422	0.948728	-0.0192501	1.77585e-06	0.00224012	1.38101e-17	TRUE	7
REACTOME_INTERFERON_GAMMA_SIGNALING	-0.0117956	5.1587e-10	-0.0027983	0.184285	-0.0158206	0.049546	-0.0185534	0.0489144	-0.0100669	5.5274e-10	-0.0116035	0.00057161	-0.00943388	0.16646	-0.0205878	0.0106713	0.00418216	0.979434	-0.0173355	0.0117659	3.71671e-17	6.83027e-05	TRUE	7
REACTOME_NOD1_2_SIGNALING_PATHWAY	-0.00757033	0.00432658	-0.00448082	0.629406	-0.0156522	0.0270963	-0.0149361	0.345692	-0.0103018	2.5251e-16	-0.0250435	1.35302e-18	-0.0179847	2.60785e-06	-0.0219949	0.0223583	-0.0141586	0.178207	-0.0278875	7.15052e-06	1.36898e-15	1.15063e-25	TRUE	7
REACTOME_RND2_GTPASE_CYCLE	-0.00171786	0.464216	-0.0123312	1.31793e-06	-0.0173317	0.00453447	-0.0102051	0.0272488	-0.00348675	0.000447482	-0.0117784	2.67705e-07	-0.0061826	0.0320304	-0.0106133	0.0919844	-0.00241521	0.827476	-0.0091676	0.0853747	1.4902e-09	8.60642e-07	TRUE	7
REACTOME_SIGNALING_BY_ERBB2	-0.00517214	0.00266366	-0.00709979	0.0190255	-0.0127558	0.31475	-0.0114549	0.627625	-0.0048231	2.56413e-05	-0.0078772	0.000157624	-0.00932889	0.00803326	-0.0166429	0.000247623	-0.00501349	0.802639	-0.0186816	0.000204907	3.07286e-06	2.15481e-09	TRUE	7
REACTOME_SIGNALING_BY_FGFR	-0.00263808	0.0256957	-0.00909859	0.000828643	-0.000668809	0.727069	-0.00537834	0.624438	-0.00327438	0.0381987	-0.0106173	1.59358e-08	-0.0185409	1.74627e-11	-0.0160421	0.0101064	-0.00728259	0.240515	-0.0165391	0.000102549	0.000986885	3.49196e-20	TRUE	7
REACTOME_SIGNALING_BY_FGFR2	-0.0051869	0.00124908	-0.0113275	0.000267086	0.00107084	0.734	-0.00611273	0.629812	-0.00365314	0.0146877	-0.0131178	1.44668e-08	-0.0221754	1.673e-10	-0.0211938	0.00936497	-0.00822095	0.262325	-0.021032	0.000193819	1.82919e-05	4.77224e-19	TRUE	7
REACTOME_SIGNALING_BY_NOTCH	-0.0203939	4.35644e-22	-0.0199601	9.89936e-12	-0.0177007	0.0288493	-0.0106479	0.38757	-0.0184417	9.19541e-35	-0.00842729	0.0171902	-0.00591886	0.287873	-0.0166527	0.0116873	-0.00415566	0.799858	-0.011187	0.0316634	1.16303e-61	0.00273287	TRUE	7
REACTOME_SYNTHESIS_OF_ACTIVE_UBIQUITIN_ROLES_OF_E1_AND_E2_ENZYMES	-0.00646552	0.0181156	-0.0113985	0.013294	0.000838123	0.558605	-0.00838123	0.843671	-0.0114224	2.67718e-08	-0.0155532	0.000191386	-0.0180316	0.0234811	-0.0289272	0.0619319	-0.0298372	0.00748176	-0.0148587	0.0247937	7.3219e-08	8.07311e-07	TRUE	7
REACTOME_TCF_DEPENDENT_SIGNALING_IN_RESPONSE_TO_WNT	-0.0222802	5.9392e-24	-0.024327	5.55965e-12	-0.0271286	0.0125128	-0.0136993	0.133502	-0.0204505	1.62299e-36	-0.0140698	0.000396841	-0.00729331	0.281968	-0.0158994	0.0243972	-0.00969697	0.44971	-0.00960549	0.0670187	3.0578e-66	0.000314691	TRUE	7
REACTOME_TCR_SIGNALING	-0.0334076	1.23278e-20	-0.0361959	3.94871e-11	-0.0292202	0.0186699	-0.0243578	0.166002	-0.0253473	3.81008e-28	-0.0174115	0.00373837	-0.0112123	0.186366	-0.0255177	0.0284757	-0.0122379	0.564404	-0.0148853	0.173453	9.1275e-54	0.00335289	TRUE	7
REACTOME_TRANSCRIPTIONAL_REGULATION_BY_RUNX3	-0.0346036	1.04592e-22	-0.0371271	8.49295e-12	-0.0304518	0.0353789	-0.0221713	0.290355	-0.0352402	3.37653e-40	-0.0207783	0.00304143	-0.0114985	0.390261	-0.017487	0.035693	-0.00616212	0.789737	-0.0240967	0.0796565	1.13875e-67	0.00420954	TRUE	7
REN_ALVEOLAR_RHABDOMYOSARCOMA_UP	-0.00805699	7.0038e-19	-0.00656557	1.19171e-08	-0.00563239	0.0698152	-0.000491585	0.495417	-0.00633644	8.3117e-33	-0.005999	1.45048e-10	-0.00798617	6.95807e-08	-0.000808199	0.38125	-0.00970672	0.00740977	-0.00446176	0.0160992	3.65661e-53	1.21107e-16	TRUE	7
RICKMAN_HEAD_AND_NECK_CANCER_F	-0.0052283	2.60419e-09	-0.00287557	0.00929848	-0.0052283	0.0439028	0.00045312	0.909174	-0.0022656	5.94027e-06	-0.00392123	5.7585e-06	-0.00526316	0.00147038	-0.00238759	0.345122	-0.00332869	0.457422	-0.00249216	0.700298	6.58823e-13	8.90998e-06	TRUE	7
RUAN_RESPONSE_TO_TROGLITAZONE_UP	-0.0215811	4.32423e-16	-0.0226075	6.4919e-07	-0.0111789	0.0426803	-0.0133148	0.351361	-0.0164632	6.07823e-13	-0.0111928	0.000453156	-0.0120388	0.0169261	-0.00596394	0.407658	-0.0105132	0.518035	-0.0106657	0.386629	5.05303e-30	0.00146375	TRUE	7
SCHUETZ_BREAST_CANCER_DUCTAL_INVASIVE_UP	-0.0115502	6.98732e-17	-0.00147852	0.301826	-0.00948847	0.150918	-0.0132843	0.0113898	-0.014539	2.06184e-45	-0.0109022	1.64144e-06	-0.00578804	0.00208255	-0.0134775	0.0492253	-0.010094	0.460507	-0.0090078	0.000505947	1.52133e-57	1.69564e-09	TRUE	7
TONKS_TARGETS_OF_RUNX1_RUNX1T1_FUSION_MONOCYTE_DN	-0.00580115	0.00514052	-0.0063023	0.0198835	-0.0182691	0.049546	-0.0216252	0.100627	-0.00570244	1.49982e-06	-0.00930918	0.0013731	-0.0105393	0.00208255	-0.00741089	0.395342	-0.0117314	0.792262	-0.00886118	0.146971	2.23814e-08	0.000451554	TRUE	7
TSENG_IRS1_TARGETS_UP	-0.00750328	6.42149e-08	-0.00773591	0.000377269	-0.00380079	0.564008	-0.0135976	0.261233	-0.00614351	7.68922e-09	-0.013021	1.09212e-13	-0.00908257	0.00158479	-0.0148165	0.0180015	-0.0105931	0.57085	-0.019325	2.05713e-05	5.15411e-15	1.17513e-17	TRUE	7
URS_ADIPOCYTE_DIFFERENTIATION_UP	-0.00940827	2.59994e-24	-0.013036	4.82179e-18	-0.00837348	0.00242495	-0.00353256	0.327731	-0.00643473	5.80649e-21	-0.0076063	7.59891e-12	-0.00559025	0.000245184	-0.00554267	0.177695	-0.00994945	0.521096	-0.00613738	0.0503437	1.1856e-57	9.56745e-13	TRUE	7
WALLACE_PROSTATE_CANCER_RACE_UP	-0.0122008	3.18237e-35	-0.00503533	0.00488021	-0.0112159	0.0384694	-0.00430684	0.19629	-0.0128331	1.1209e-53	-0.00981861	2.25748e-09	-0.0112377	0.000203578	-0.00829606	0.0695501	-0.0027231	0.890952	-0.011583	8.87735e-05	1.11835e-84	3.14144e-13	TRUE	7
WANG_SMARCE1_TARGETS_DN	-0.00939359	9.07832e-16	-0.0118359	5.34389e-11	-0.0154171	0.00015987	-0.00797412	0.100627	-0.00456111	6.26576e-11	-0.00879171	8.02559e-06	-0.00528129	0.0278375	-0.00688168	0.154593	-0.0035916	0.5674	-0.00853541	0.0420717	1.57967e-34	8.03093e-06	TRUE	7
WEINMANN_ADAPTATION_TO_HYPOXIA_UP	-0.0397421	2.3313e-31	-0.00685468	0.0980104	-0.0418813	0.000174391	-0.0247974	0.20188	-0.0329025	1.81969e-46	-0.0279309	4.26981e-10	-0.0247522	0.0225481	-0.0270873	0.0706764	-0.0290458	0.0460703	-0.0340926	0.000329478	7.85509e-75	1.11836e-12	TRUE	7
WP_CARDIAC_PROGENITOR_DIFFERENTIATION	-0.0148143	1.78016e-18	-0.00324525	0.0489889	-0.0167952	0.0911625	-0.0139293	0.224475	-0.0177962	1.46448e-38	-0.0168795	7.04018e-14	-0.0126333	2.60785e-06	-0.011527	0.188219	-0.0211995	0.00740977	-0.0206305	0.000224875	3.71475e-52	2.93538e-20	TRUE	7
WP_CYTOPLASMIC_RIBOSOMAL_PROTEINS	0.00222769	0.0694231	-0.00676835	9.87044e-07	-0.00589433	0.209258	-0.0038052	0.534801	-0.00119912	0.0457347	-0.0115275	2.30506e-19	-0.0133075	1.20303e-12	-0.0159776	0.00463579	-0.0127586	0.0372541	-0.0148744	1.77585e-06	3.97723e-06	2.68311e-34	TRUE	7
YAO_TEMPORAL_RESPONSE_TO_PROGESTERONE_CLUSTER_7	-0.0145454	7.98211e-09	-0.0153581	0.0006928	-0.0184173	0.00986967	-0.00827174	0.643006	-0.00428598	0.00295523	-0.0116933	0.000832393	-0.00606145	0.390077	-0.0212021	0.0231944	-0.0117399	0.72732	-0.0088256	0.634572	8.86545e-12	0.0050876	TRUE	7
ASGHARZADEH_NEUROBLASTOMA_POOR_SURVIVAL_DN	-0.0100961	6.4196e-07	-0.00992243	0.010522	-0.0240593	0.00368649	-0.00942457	0.707217	-0.0150747	3.27079e-29	-0.00869515	0.000286291	-0.00464282	0.410822	-0.0128285	0.207569	-0.00435336	0.964846	-0.00635637	0.0983399	1.67267e-33	0.00380666	TRUE	6
BENPORATH_NANOG_TARGETS	-0.00260263	7.9572e-08	-0.00211073	0.000345605	-0.00245282	0.193886	-0.00438915	0.0720776	-0.00221749	2.32464e-10	-0.00314708	0.00260258	-0.00189272	0.0420981	-0.00493807	0.0546077	-0.00222085	0.802639	-0.00200731	0.118677	2.67996e-17	0.00136475	TRUE	6
BERENJENO_TRANSFORMED_BY_RHOA_REVERSIBLY_DN	-0.01537	3.75051e-08	-0.00912432	0.0136752	-0.0256766	0.0207083	0.00310998	0.90423	-0.00729946	8.97137e-05	-0.019598	2.5307e-05	-0.0206133	0.0672764	-0.0232863	0.0750411	-0.00194052	0.922009	-0.0448634	7.80511e-05	5.85183e-11	1.88128e-07	TRUE	6
CROMER_TUMORIGENESIS_DN	-0.00730435	0.000134367	-0.00197442	0.439909	0.00126854	0.893869	-0.0224041	0.0172002	-0.0145371	1.3812e-18	-0.0103223	0.00205292	-0.00651662	0.0126707	-0.0131355	0.414388	-0.0186598	0.443648	-0.00558568	0.0770218	5.16635e-19	0.000984994	TRUE	6
DACOSTA_ERCC3_ALLELE_XPCS_VS_TTD_DN	-0.0195769	2.02458e-30	-0.0115902	7.79351e-07	-0.00982004	0.190354	-0.0089139	0.134622	-0.0138345	1.49453e-38	-0.00787078	2.11855e-06	-0.00766005	0.0189023	-0.00596367	0.618244	-0.0053947	0.450395	-0.0111476	0.00221103	2.31897e-68	4.33548e-07	TRUE	6
DER_IFN_ALPHA_RESPONSE_UP	-0.0334246	1.16303e-25	-0.0182897	6.17469e-05	-0.0361275	0.000281057	-0.0174882	0.149649	-0.0307856	9.33024e-51	-0.0176971	0.001182	-0.0116943	0.756269	-0.0179401	0.0627679	-0.000784454	0.981173	-0.016448	0.0660215	1.64241e-76	0.00525155	TRUE	6
DUNNE_TARGETS_OF_AML1_MTG8_FUSION_UP	-0.00733009	5.47379e-07	-0.00262426	0.228952	-0.0113445	0.00512932	-0.00972389	0.256145	-0.0124002	1.08322e-27	-0.0150245	1.65854e-08	-0.0128091	4.59737e-05	-0.00341972	0.908843	-0.0156341	0.50633	-0.00764233	0.0291742	3.99654e-31	5.21941e-10	TRUE	6
EINAV_INTERFERON_SIGNATURE_IN_CANCER	-0.0316177	1.16303e-25	-0.0154086	0.003302	-0.049361	0.000667136	-0.0407962	0.068787	-0.035113	3.18721e-50	-0.0316044	3.6286e-10	-0.011393	0.119358	-0.0444782	0.0509525	-0.0134742	1	-0.0298034	0.00364968	2.92948e-74	4.22607e-10	TRUE	6
FAELT_B_CLL_WITH_VH3_21_DN	-0.00764375	0.000117013	-0.00685665	0.019223	-0.0108246	0.13558	-0.00657265	0.954807	-0.00843084	3.68184e-10	-0.00748957	0.00549712	-0.0116523	0.0240339	-0.00989954	0.11181	-0.0164641	0.524153	-0.0121391	0.0244014	9.13217e-12	0.000594871	TRUE	6
FERNANDEZ_BOUND_BY_MYC	-0.00540673	3.89001e-07	-0.00745035	3.52579e-07	-4.44267e-05	0.834678	-0.000315429	0.90423	-0.0068617	2.79803e-19	-0.00542005	0.00292445	-0.00577102	0.0425909	-0.00547337	0.12989	-0.00485584	0.454233	-0.0119352	0.000388087	3.54896e-26	2.20394e-05	TRUE	6
FOSTER_KDM1A_TARGETS_UP	-0.00501688	3.63435e-17	-0.00216766	0.00163553	-0.00261735	0.13558	-0.00357295	0.14809	-0.00406831	3.58227e-29	-0.00391373	5.9195e-05	-0.00458475	9.25062e-05	-0.00302137	0.136784	-0.00366078	0.889197	-0.0033604	0.0305075	3.08212e-43	3.68241e-07	TRUE	6
FURUKAWA_DUSP6_TARGETS_PCI35_UP	-0.0219193	4.54035e-30	-0.00793194	0.00233145	-0.01454	0.047554	-0.00364938	0.736857	-0.0188916	1.56064e-37	-0.011518	1.95204e-08	-0.00747721	0.127483	-0.00825428	0.577979	-0.0111381	0.450395	-0.0154379	0.00140815	1.69169e-63	2.60671e-08	TRUE	6
GAZDA_DIAMOND_BLACKFAN_ANEMIA_PROGENITOR_DN	-0.0145051	5.73955e-09	-0.0202566	6.33223e-09	-0.00624985	0.427299	-0.00761546	0.393734	-0.00794764	1.3486e-06	-0.0204289	8.72617e-14	-0.021247	9.81001e-05	-0.026242	0.140095	-0.00997146	0.463682	-0.00915947	0.130013	2.96087e-18	1.24715e-14	TRUE	6
HADDAD_T_LYMPHOCYTE_AND_NK_PROGENITOR_DN	-0.00434783	3.20037e-06	-0.00257195	0.03584	-0.00190855	0.346844	0.0019902	0.760351	-0.00369973	1.3773e-09	-0.00482241	0.0012577	-0.0047969	0.00712674	-0.00518473	0.795729	-0.000454174	0.880288	-0.00550623	0.0656494	3.91682e-12	0.00107166	TRUE	6
HELLER_HDAC_TARGETS_DN	-0.00481678	1.69715e-07	-0.00581919	7.68134e-06	-0.00756174	0.0424821	-0.00859328	0.408037	-0.00146572	0.0173125	-0.00411015	0.00151375	-0.00424565	0.166215	-0.00451082	0.618244	-0.00296205	0.880288	-0.00587747	0.0306817	2.89952e-11	0.00581901	TRUE	6
HOLLEMAN_ASPARAGINASE_RESISTANCE_B_ALL_UP	-0.0251616	4.68585e-12	-0.021666	9.13092e-05	-0.0170492	0.417234	-0.0188959	0.351361	-0.00582047	0.0134443	-0.0296465	1.47338e-10	-0.0342963	2.31595e-05	-0.0369344	0.149619	-0.0245185	0.0749825	-0.0368685	0.00408874	1.16298e-13	2.51996e-14	TRUE	6
HUANG_DASATINIB_SENSITIVITY_UP	-0.0121367	9.15591e-12	-0.00419803	0.215992	-0.0231503	0.00663985	-0.0190745	0.0225755	-0.0165929	6.72508e-28	-0.00941499	0.0015947	-0.00524867	0.314242	-0.0117563	0.11181	-0.0118695	0.844886	-0.0134002	0.00316324	8.08833e-37	0.000498313	TRUE	6
IVANOVA_HEMATOPOIESIS_EARLY_PROGENITOR	-0.00341324	4.14053e-07	-0.00665362	7.53817e-08	-0.0055991	0.190354	-0.00328455	0.271804	-0.00208982	1.17737e-05	-0.0025729	0.00494166	-0.00414411	0.00151439	-0.00209174	0.54297	-0.00363318	0.844886	-0.000229534	0.76108	3.68554e-15	0.00415023	TRUE	6
JAATINEN_HEMATOPOIETIC_STEM_CELL_UP	-0.00434311	1.81383e-07	-0.00617699	1.69098e-07	-0.00237924	0.104775	-0.00409162	0.304141	-0.00748953	5.91111e-41	-0.00557512	1.53476e-05	-0.00606396	0.000198684	-0.00337389	0.335112	-0.00673931	0.240665	-0.0094096	2.0634e-06	6.503e-49	3.65504e-11	TRUE	6
KEGG_ABC_TRANSPORTERS	-0.00764135	5.84014e-15	-0.0116126	4.33145e-06	-0.00222088	0.646852	-0.0115938	0.0802107	-0.00553339	1.28646e-19	-0.0116785	5.9232e-11	-0.00969284	0.00981143	-0.00886471	0.183443	-0.008046	0.735627	-0.00658737	0.0456461	5.17187e-34	2.06666e-10	TRUE	6
KEGG_CELL_ADHESION_MOLECULES_CAMS	-0.0028219	0.0033739	-0.00234307	0.176078	0.0011045	0.850458	-0.00490321	0.451546	-0.00625032	1.68923e-16	-0.00869873	1.83515e-07	-0.00698452	0.000174163	-0.0107896	0.0376947	-0.011693	0.564404	-0.0102054	0.000365266	7.02617e-15	1.93405e-11	TRUE	6
KEGG_PATHOGENIC_ESCHERICHIA_COLI_INFECTION	-0.00940488	0.000102379	-0.0140716	0.00772977	0.00111317	0.993587	0.015142	0.425117	-0.0172827	9.50407e-14	-0.0147638	0.00183225	-0.0178036	0.0094274	-0.021764	0.272309	-0.0330384	0.204805	-0.0189382	0.0225839	5.89052e-15	0.000111547	TRUE	6
KEGG_PRIMARY_IMMUNODEFICIENCY	-0.006061	2.96984e-19	-0.00916754	0.000103323	-0.00182482	0.231114	-0.00747306	0.527769	-0.00414929	6.30643e-28	-0.00913495	6.413e-07	-0.0100908	0.00445815	-0.0103841	0.0664594	-0.013306	0.378985	-0.00644117	0.0243767	1.88015e-44	4.57595e-08	TRUE	6
KEGG_RIBOSOME	1.09842e-05	0.830765	-0.0111105	4.50425e-06	-0.00705185	0.248624	-0.00208699	0.639653	-0.00447605	5.88418e-05	-0.0137632	2.38971e-13	-0.0154383	3.09361e-10	-0.0109402	0.0407747	-0.0103141	0.17636	-0.0134886	5.20873e-05	5.8263e-07	2.29452e-23	TRUE	6
KLEIN_PRIMARY_EFFUSION_LYMPHOMA_DN	-0.00569576	1.16766e-05	0.000819939	0.969825	-0.00353012	0.600532	-0.00776125	0.592521	-0.00413099	1.92868e-05	-0.0107906	4.65435e-06	-0.0132066	0.00158479	-0.0226078	0.00261168	-0.0124994	0.609964	-0.00833709	0.0435403	1.1371e-06	1.58287e-08	TRUE	6
KOHOUTEK_CCNT2_TARGETS	-0.00506816	0.000689705	-0.00417249	0.00557485	-0.00766049	0.128499	-0.0056944	0.415853	-0.0040487	7.86551e-09	-0.00635704	0.000117373	-0.0034079	0.012711	-0.0066556	0.109684	0.0022865	0.961476	-0.00650996	0.0595051	1.02244e-10	5.72021e-05	TRUE	6
KORKOLA_YOLK_SAC_TUMOR	-0.00484911	1.18004e-08	-0.00416865	0.000478193	-0.00517943	0.487007	-0.00761059	0.149649	-0.00699619	1.91471e-28	-0.00515961	0.0149007	-0.00301913	0.0254336	-0.000396385	0.979857	-0.00252365	0.964846	-0.011297	0.000829802	2.4924e-34	0.00083845	TRUE	6
KRASNOSELSKAYA_ILF3_TARGETS_UP	-0.028564	1.42539e-18	-0.013916	0.0269766	-0.0291739	0.0115268	-0.0212792	0.22248	-0.0290519	1.89441e-27	-0.0263855	0.000100931	-0.0119205	0.501692	-0.00756361	0.187182	-0.0163733	0.922009	-0.0276926	0.00872457	1.27879e-42	0.000296721	TRUE	6
KYNG_DNA_DAMAGE_BY_GAMMA_RADIATION	-0.00683773	0.00206616	-0.006906	0.00474393	-0.00192213	0.470136	-0.0164379	0.137505	-0.00723686	8.76613e-10	-0.00818742	0.0066542	-0.00890691	0.0826112	-0.0163959	0.0269348	-0.00649637	0.739393	-0.00767276	0.0681075	3.96116e-11	0.00166562	TRUE	6
LINDVALL_IMMORTALIZED_BY_TERT_UP	-0.00685103	0.00358552	0.00180196	0.494329	-0.00537615	0.533706	-0.0142373	0.297478	-0.0108653	4.98723e-14	-0.0154802	7.30759e-05	-0.00858757	0.0256046	-0.0213857	0.0165619	-0.00805233	0.579847	-0.0220636	0.00440624	1.47375e-12	1.15491e-06	TRUE	6
MANNE_COVID19_COMBINED_COHORT_VS_HEALTHY_DONOR_PLATELETS_DN	0.000551653	0.233755	-0.00210739	0.0229178	-0.000646902	0.839321	-0.00462754	0.264702	-0.0011172	0.00720675	-0.00325237	1.23855e-05	-0.00419693	1.40123e-06	-0.00671112	0.0188319	0.0005457	1	-0.00335754	0.0914107	0.00958279	1.33661e-09	TRUE	6
MCGARVEY_SILENCED_BY_METHYLATION_IN_COLON_CANCER	-0.0160366	1.11625e-30	-0.0167004	1.49506e-10	-0.00632191	0.277575	-0.00984111	0.510956	-0.0161736	1.01702e-40	-0.0114111	1.01461e-09	-0.00689088	0.00117895	-0.0145825	0.0712118	-0.00201248	1	-0.00697518	0.262814	1.21707e-73	1.03791e-09	TRUE	6
MEBARKI_HCC_PROGENITOR_WNT_UP	-0.0089331	4.77139e-17	-0.00348085	0.0233792	0.00177473	0.828928	-0.00710806	0.14809	-0.0121578	5.23506e-52	-0.0108313	1.21688e-13	-0.00470212	0.00144723	-0.00340309	0.374347	-0.00716524	0.518035	-0.0102161	0.000101819	2.08395e-63	7.78151e-16	TRUE	6
MEBARKI_HCC_PROGENITOR_WNT_UP_CTNNB1_DEPENDENT	-0.00965899	1.62687e-21	-0.00367	0.00218957	-0.00621157	0.346844	-0.00463797	0.180241	-0.0106942	2.59895e-49	-0.0116622	1.643e-15	-0.00615463	0.000306516	-0.00364412	0.701847	-0.0064652	0.336624	-0.0134998	3.17612e-06	1.99732e-66	1.6929e-19	TRUE	6
MEBARKI_HCC_PROGENITOR_WNT_UP_CTNNB1_DEPENDENT_BLOCKED_BY_FZD8CRD	-0.0026215	0.00118061	-0.00535299	6.35271e-05	-0.00300647	0.558605	-0.00370309	0.809295	-0.00218152	7.26712e-05	-0.00814864	1.68962e-07	-0.00346477	0.00799376	0.00174155	0.872137	-0.00111826	0.983858	-0.00865277	0.0131457	6.1196e-08	2.88669e-07	TRUE	6
OSMAN_BLADDER_CANCER_DN	0.00110311	0.140706	-0.00238709	0.0140397	-0.00360632	0.141001	-0.00202534	0.539928	-0.00100374	0.0128943	-0.00442025	1.26465e-06	-0.0038553	0.00799934	-0.00741808	0.00261168	0.00187797	0.910443	-0.00481103	0.0468221	0.00334917	3.12537e-08	TRUE	6
OUELLET_CULTURED_OVARIAN_CANCER_INVASIVE_VS_LMP_DN	-0.00584291	5.6601e-07	-0.00923132	2.30179e-05	-0.007591	0.490371	-0.0134579	0.346658	-0.00972222	6.45835e-22	-0.00966236	8.57208e-06	-0.0168343	8.61608e-07	-0.0149186	0.096036	-0.00978209	0.664643	-0.0157328	0.00194263	2.05691e-27	6.17773e-11	TRUE	6
PETROVA_PROX1_TARGETS_DN	-0.0136356	1.46237e-13	-0.00507373	0.0644812	-0.00918292	0.0426803	-0.0095793	0.425117	-0.0146002	2.5633e-30	-0.0108609	1.10352e-06	-0.00674515	0.0111161	-0.00581365	0.606874	-0.0183857	0.151424	-0.0134308	0.00230082	2.25987e-39	6.39431e-08	TRUE	6
PID_CD8_TCR_PATHWAY	-0.00640887	1.68383e-09	-0.00410907	0.0121562	-0.00485443	0.431773	-0.00566987	0.756905	-0.00807161	1.18062e-16	-0.00721157	1.98262e-05	-0.00443397	0.0617515	-0.00806524	0.0180015	-0.00142702	0.983858	-0.0103204	8.49721e-05	5.32682e-22	4.77012e-08	TRUE	6
PID_TCR_PATHWAY	-0.00796537	7.40292e-12	-0.00372775	0.00843845	-0.00355779	0.713243	-0.00116705	0.992056	-0.00803902	3.78285e-19	-0.00646974	9.13418e-06	-0.0043396	0.248934	-0.00967629	0.0169532	0.00273066	0.988357	-0.00878117	0.00175918	2.11062e-26	1.00466e-06	TRUE	6
POOLA_INVASIVE_BREAST_CANCER_UP	-0.0091824	3.91517e-14	-0.00586536	0.00114872	-0.00472659	0.28156	-0.00801203	0.401331	-0.00647612	3.29555e-13	-0.00722377	1.90262e-05	-0.00493118	0.00496902	-0.00377886	0.220742	-0.00910417	0.631462	-0.00250019	0.482484	1.63602e-24	4.19985e-05	TRUE	6
PUJANA_BREAST_CANCER_LIT_INT_NETWORK	-0.00643589	0.000151817	-0.00358455	0.0517859	-0.00064433	0.986515	0.00432516	0.903273	-0.00435848	0.00228683	-0.0077764	0.00030295	-0.0107351	0.000817657	-0.0181894	0.00261168	-0.00925391	0.698248	-0.0150418	0.00234577	8.76163e-05	2.96558e-08	TRUE	6
REACTOME_AGGREPHAGY	-0.00809254	0.00939584	-0.00811495	0.197597	0.0067251	0.650332	-0.00939272	0.989833	-0.0192786	6.11933e-10	-0.0275953	0.000123761	-0.0456971	0.00108244	-0.0581273	0.0827681	-0.0407429	0.0372541	-0.0357663	0.0127482	2.15467e-08	1.17091e-07	TRUE	6
REACTOME_CA2_PATHWAY	-0.00501934	3.30144e-05	-0.00408685	0.0202741	-0.0058252	0.33126	-0.00046049	0.973374	-0.00865146	1.84548e-19	-0.00746569	0.000307386	-0.00256723	0.866118	-0.0116849	0.043142	-0.000454734	0.943902	-0.0120591	0.00900751	2.08151e-20	0.000359095	TRUE	6
REACTOME_CTLA4_INHIBITORY_SIGNALING	-0.00689223	0.0155614	-0.0115255	0.00804746	0.0079475	0.164598	-0.0091017	0.897831	-0.00634811	1.52074e-05	-0.00900277	0.0063066	-0.00832674	0.0319062	-0.0218309	0.18489	-0.0168843	0.336624	-0.00974476	0.0961759	3.31595e-06	0.00236956	TRUE	6
REACTOME_DEACTIVATION_OF_THE_BETA_CATENIN_TRANSACTIVATING_COMPLEX	-0.00777309	3.10606e-05	-0.00325604	0.477992	-0.00359482	0.537834	-0.00598509	0.731371	-0.0107751	2.11233e-12	-0.0210419	2.58361e-11	-0.0235169	4.16452e-06	-0.026613	0.00954594	-0.00558044	0.735895	-0.0309889	2.0634e-06	1.31228e-12	6.32033e-19	TRUE	6
REACTOME_DEVELOPMENTAL_BIOLOGY	-0.00524547	2.62211e-13	-0.00615958	1.3145e-07	-0.00474089	0.0362075	-0.00380826	0.549343	-0.00395234	1.35734e-17	-0.00453105	6.53108e-05	-0.00295932	0.0865334	-0.00474209	0.052746	-0.002939	0.574898	-0.00711314	0.0020946	2.38793e-32	4.05424e-06	TRUE	6
REACTOME_DOWNREGULATION_OF_TGF_BETA_RECEPTOR_SIGNALING	-0.00873786	0.00407008	-0.00238558	0.356387	-0.00546463	0.289345	-0.00990291	0.850974	-0.00746186	2.51686e-05	-0.0196394	3.93461e-05	-0.0132316	0.0362409	-0.0279612	0.0106713	-0.0210818	0.631462	-0.0263939	0.000930051	5.53777e-05	1.83641e-07	TRUE	6
REACTOME_EUKARYOTIC_TRANSLATION_ELONGATION	0.000987322	0.951943	-0.00886489	1.88159e-05	-0.0064176	0.121568	-0.00634407	0.533671	-0.00201141	0.00136502	-0.0126829	9.67337e-14	-0.0141166	1.55012e-08	-0.0155976	0.0148364	-0.00957913	0.0807938	-0.0141009	4.92591e-05	1.36983e-05	6.83912e-23	TRUE	6
REACTOME_INTERFERON_ALPHA_BETA_SIGNALING	-0.0283035	3.68977e-30	-0.0205611	7.20547e-06	-0.0401833	8.25646e-05	-0.021694	0.158438	-0.0233276	2.02393e-37	-0.0123429	0.000657081	-0.00386811	0.753341	-0.0194908	0.0772114	0.0106655	0.802639	-0.0111474	0.0433377	2.83701e-69	0.00254666	TRUE	6
REACTOME_JNK_C_JUN_KINASES_PHOSPHORYLATION_AND_ACTIVATION_MEDIATED_BY_ACTIVATED_HUMAN_TAK1	-0.00362749	0.130752	-0.0146419	3.25759e-05	-0.00900277	0.161128	-0.00445192	0.436012	-0.00613376	9.33509e-07	-0.0249307	1.35302e-18	-0.0265137	1.48409e-13	-0.027404	0.00156536	-0.0144605	0.159652	-0.0257717	3.10688e-06	9.37587e-09	4.79213e-34	TRUE	6
REACTOME_MAPK_FAMILY_SIGNALING_CASCADES	-0.0100328	4.02623e-20	-0.0111626	1.15033e-07	-0.0112383	0.00199212	-0.0082741	0.393849	-0.0115279	2.09008e-33	-0.00482199	0.0122586	0.000714949	0.965728	-0.00772093	0.0593036	-0.00512728	0.709625	-0.0113922	0.00971102	1.36245e-55	0.00642786	TRUE	6
REACTOME_NONSENSE_MEDIATED_DECAY_NMD	0.00149744	0.55968	-0.0111294	6.86969e-08	-0.00432073	0.380118	-0.00128686	0.799074	-0.00330294	0.0191322	-0.00930049	3.29607e-08	-0.0141711	1.08546e-05	-0.011496	0.0223583	-0.0122837	0.173156	-0.0105679	0.00196045	2.73918e-06	3.35114e-13	TRUE	6
REACTOME_NOTCH1_INTRACELLULAR_DOMAIN_REGULATES_TRANSCRIPTION	-0.00158655	0.367661	-0.00927336	0.0200336	-0.0170236	0.0637332	-0.00488656	0.643006	-0.00644931	3.1702e-06	-0.0124861	5.98927e-06	-0.0105664	0.0064106	-0.0188323	0.0422239	-0.0177614	0.70419	-0.0234967	3.44628e-05	9.07184e-06	1.70084e-09	TRUE	6
REACTOME_OVARIAN_TUMOR_DOMAIN_PROTEASES	-0.00405607	0.0420973	-0.00256487	0.17923	-0.0201809	0.161275	-0.00532856	0.897831	-0.00912616	5.69777e-10	-0.0198926	2.29644e-13	-0.0192464	1.57936e-06	-0.0233224	0.00190099	-0.00977234	0.454233	-0.0313948	1.11044e-05	1.87502e-08	2.13398e-21	TRUE	6
REACTOME_RAF_ACTIVATION	-0.0072702	0.000787007	-0.00391959	0.0163873	-0.00760737	0.708198	-0.00897711	0.924438	-0.00383529	0.00626853	-0.0130864	1.23301e-05	-0.00928267	0.0331543	-0.0207359	0.0646036	-0.0117061	0.671256	-0.0203039	0.00646468	0.000223629	1.57262e-06	TRUE	6
REACTOME_SARS_COV_INFECTIONS	-0.00596686	7.96066e-05	-0.0043685	0.0359443	-0.000800497	0.716687	-0.000163259	0.992056	-0.00421051	3.2888e-06	-0.0096165	5.01968e-05	-0.00569564	0.136813	-0.00890553	0.0364468	-0.010496	0.463682	-0.0149409	0.00433432	1.43584e-07	5.35383e-06	TRUE	6
REACTOME_SELECTIVE_AUTOPHAGY	-0.0077768	0.000747501	-0.0109842	0.00480541	0.00864455	0.839321	0.0045804	0.98074	-0.0102592	1.48731e-09	-0.0114181	0.0193108	-0.0199363	0.0187097	-0.0203317	0.16566	-0.0320518	0.0812224	-0.00657403	0.197621	2.4786e-10	0.0020077	TRUE	6
REACTOME_SIGNALING_BY_ERBB4	-0.00649351	0.000128428	-0.00236192	0.330659	-0.00676466	0.277575	-0.0158841	0.264702	-0.00769944	7.0977e-10	-0.00977594	1.62864e-06	-0.00662195	0.047467	-0.00983302	0.0463455	2.85429e-05	1	-0.0136078	5.25504e-05	1.35153e-10	6.65834e-09	TRUE	6
REACTOME_SIGNALING_BY_FGFR3	-0.00396411	0.0973898	-0.00769618	0.00404633	-0.00214642	0.914641	-0.00253316	0.659714	-0.00556909	0.0011373	-0.0162915	7.48266e-09	-0.0207294	4.41619e-08	-0.0199172	0.00156536	-0.0168523	0.215247	-0.0260568	8.60083e-07	0.000780604	4.71612e-20	TRUE	6
REACTOME_SIGNALING_BY_FGFR4	-0.00427238	0.0865141	-0.00798954	0.0038942	-0.00208914	0.910679	-0.00246556	0.659714	-0.00509109	0.00124791	-0.0153297	8.49882e-09	-0.0193386	1.24448e-07	-0.0193857	0.00156536	-0.0166096	0.211144	-0.0253614	6.26576e-07	0.00074136	1.01912e-19	TRUE	6
REACTOME_SIGNALING_BY_INTERLEUKINS	-0.0106273	1.61107e-15	-0.00764238	3.78183e-05	-0.0101441	0.0101832	-0.00703186	0.440544	-0.00671567	1.12929e-15	-0.0071124	0.0121975	-0.00329619	0.368155	-0.00964694	0.0803693	-0.00657746	0.777383	-0.013666	0.00228987	6.74096e-31	0.00149173	TRUE	6
REACTOME_SIGNALING_BY_PDGF	-0.0106772	3.1727e-08	-0.000726253	0.379913	-0.00726253	0.108579	-0.0101293	0.408037	-0.00967701	2.33833e-14	-0.0125119	1.28985e-10	-0.0071606	0.0213154	-0.0187807	0.0240687	-0.00279671	0.995953	-0.0161687	5.23724e-05	4.34794e-18	4.1621e-13	TRUE	6
REACTOME_SIGNALING_BY_RETINOIC_ACID	-0.0140774	9.31476e-21	-0.00969757	4.93486e-06	-0.0134006	0.127984	-0.00659396	0.439142	-0.0100843	6.53513e-17	-0.0066423	0.000600475	-0.00777352	0.00445815	0.00121824	0.944982	-0.0030456	0.862445	-0.00728043	0.199564	6.89589e-37	0.00111651	TRUE	6
REACTOME_SIGNALING_BY_SCF_KIT	-0.0128244	1.04867e-14	-0.0085638	0.000249998	-0.0181991	0.0371983	-0.0147634	0.351361	-0.00603803	6.21594e-06	-0.00750927	2.94949e-06	-0.00614008	0.080655	-0.00943974	0.0772114	2.55128e-05	0.915707	-0.0152992	0.000674433	9.92915e-20	2.24845e-07	TRUE	6
REACTOME_SIGNALING_BY_WNT	-0.015195	3.58866e-24	-0.0151024	4.93552e-12	-0.0142839	0.0376552	-0.0104068	0.228102	-0.0134296	1.07443e-36	-0.00787826	0.000457289	-0.00455072	0.428456	-0.00738391	0.0750411	-0.00764378	0.664643	-0.0117808	0.029665	5.50404e-66	0.000822619	TRUE	6
RIEGE_DELTANP63_DIRECT_TARGETS_UP	-0.00543775	3.66508e-06	-0.00377135	0.049189	-0.00743435	0.0982328	-0.0056596	0.330394	-0.00441624	6.78898e-06	-0.00723314	0.000141449	-0.00647475	0.00803326	-0.00436465	0.201241	-0.0124026	0.0794313	-0.0100758	0.00607785	1.7152e-09	1.52433e-06	TRUE	6
RODWELL_AGING_KIDNEY_UP	-0.00915153	1.18604e-24	-0.00504018	4.42367e-06	-0.00835379	0.000989613	-0.005822	0.143643	-0.0103388	1.23141e-53	-0.00640064	0.0026183	-0.003499	0.223054	-0.00560103	0.167284	-0.00519186	0.678627	-0.0071937	0.0275462	6.01504e-79	0.00320709	TRUE	6
SASAI_RESISTANCE_TO_NEOPLASTIC_TRANSFROMATION	-0.0303411	1.35437e-22	-0.0107464	0.0103873	-0.0160411	0.209258	0.000128443	0.938921	-0.0301413	4.90359e-33	-0.0209719	9.6563e-08	-0.0161553	0.0312933	-0.016298	0.132455	-0.0118382	0.658753	-0.0317111	3.52955e-05	1.7122e-50	4.79955e-10	TRUE	6
SASSON_RESPONSE_TO_FORSKOLIN_DN	-0.00907565	9.86273e-09	-0.00629639	0.00938872	-0.0109668	0.0982328	-0.00757335	0.554577	-0.0100875	1.75501e-16	-0.0127651	2.78329e-09	-0.0111921	0.00268354	-0.00904913	0.0926239	-0.0113733	0.623835	-0.0100566	0.00796618	5.92841e-22	1.9942e-10	TRUE	6
SATO_SILENCED_BY_METHYLATION_IN_PANCREATIC_CANCER_1	-0.00584685	5.17088e-18	0.00134584	0.992418	-0.00467121	0.126264	-0.00812572	0.0365766	-0.00782638	8.29454e-37	-0.00502004	1.15769e-06	-0.00391198	0.00496902	-0.00216541	0.297582	-0.00399044	0.579847	-0.00919515	0.00212592	2.28801e-49	5.35867e-08	TRUE	6
SMID_BREAST_CANCER_BASAL_UP	-0.0048287	1.33374e-05	-0.00250503	0.0242879	-0.00129312	0.650332	0.000367435	0.818781	-0.00202247	0.000857306	-0.00633235	0.000139041	-0.00491307	0.0457899	-0.00706801	0.0845381	-0.00937907	0.664643	-0.00483501	0.0793882	1.94445e-06	0.000137536	TRUE	6
SMID_BREAST_CANCER_RELAPSE_IN_LUNG_DN	-0.00691724	0.00600915	-0.00286359	0.0172716	-0.00572718	0.394515	-0.0101403	0.103624	-0.0111073	3.23983e-10	-0.00756186	0.00210138	-0.0138221	1.72093e-06	-0.00622304	0.530454	-0.000979323	0.972906	-0.0143055	0.00582944	8.85812e-11	2.17018e-07	TRUE	6
SWEET_KRAS_TARGETS_DN	-0.0172434	1.52009e-14	-0.0187507	0.000959732	-0.0171123	0.0342377	0.00604392	0.969164	-0.0125102	2.02753e-13	-0.0119932	0.000425788	-0.00881102	0.292148	-0.0319381	0.158464	-0.0156996	0.574898	-0.0213503	0.00426974	1.12489e-25	0.000208559	TRUE	6
TRAYNOR_RETT_SYNDROM_UP	-0.00825516	1.71544e-07	0.00325203	0.571069	-0.00925578	0.367131	0.00364514	0.933566	-0.0104976	3.91903e-17	-0.00853212	0.000128225	-0.0115519	0.0130141	-0.017368	0.0358032	-0.00367194	0.983858	-0.0185473	0.000300825	5.39777e-19	3.27446e-07	TRUE	6
VECCHI_GASTRIC_CANCER_ADVANCED_VS_EARLY_UP	-0.00640945	4.52887e-07	-0.000618455	0.335845	-0.00218333	0.803621	-0.0130532	0.0365766	-0.0125143	3.09058e-28	-0.0111345	8.79061e-08	-0.00614707	0.0399206	-0.00431513	0.469611	-0.00177806	0.832907	-0.0113969	0.0109492	2.81052e-30	2.85363e-07	TRUE	6
WEINMANN_ADAPTATION_TO_HYPOXIA_DN	-0.0262985	1.32264e-20	0.00145995	0.640599	-0.0368952	0.000423299	-0.0132653	0.0768979	-0.0192501	1.70713e-27	-0.0206907	6.85018e-07	-0.0193758	0.00116558	-0.0170553	0.0904667	-0.0349422	0.135227	-0.0274587	0.00099182	3.96021e-45	4.97238e-10	TRUE	6
WIERENGA_PML_INTERACTOME	-0.0104185	2.28538e-06	-0.0165424	0.00019231	-0.0183716	0.0667693	0.00787355	0.814096	-0.00864897	3.12498e-08	-0.00979223	0.001293	-0.0124267	0.027073	-0.0153097	0.132455	-0.00749577	0.633732	-0.0210856	0.0344442	1.04138e-13	0.000369111	TRUE	6
WINNEPENNINCKX_MELANOMA_METASTASIS_DN	-0.0064368	3.03071e-06	-0.00565573	0.202239	0.00557103	0.404863	-0.0156027	0.264702	-0.010568	6.38352e-26	-0.00848829	0.00853219	-0.00984341	0.000689357	-0.0184446	0.00123436	-0.0139276	0.435138	-0.00985282	0.50992	5.69862e-27	1.38715e-05	TRUE	6
WP_7Q1123_COPY_NUMBER_VARIATION_SYNDROME	-0.00524617	9.03135e-06	-0.0105336	9.53946e-08	-0.0168758	0.00986967	-0.00134823	0.72671	-0.0052691	6.6174e-07	-0.0102172	6.05225e-05	-0.00890564	0.190405	-0.00806185	0.145063	-0.00970816	0.840109	-0.00676866	0.0445857	9.02794e-16	0.000254786	TRUE	6
WP_EBOLA_VIRUS_PATHWAY_ON_HOST	-0.00460829	0.00254218	-0.0102497	6.75426e-05	-0.00564441	0.32402	-0.0149935	0.113385	-0.00272582	7.03829e-06	-0.00833107	0.00397648	-0.00439143	0.196664	-0.016885	0.00261168	-0.00515346	0.880288	-0.0129062	0.0214096	1.89055e-09	0.000174496	TRUE	6
WP_PATHOGENIC_ESCHERICHIA_COLI_INFECTION	-0.00940488	0.000102379	-0.0140716	0.00772977	0.00111317	0.993587	0.015142	0.425117	-0.0172827	9.50407e-14	-0.0147638	0.00183225	-0.0178036	0.0094274	-0.021764	0.272309	-0.0330384	0.204805	-0.0189382	0.0225839	5.89052e-15	0.000111547	TRUE	6
WP_THE_HUMAN_IMMUNE_RESPONSE_TO_TUBERCULOSIS	-0.0381316	1.69222e-28	-0.0131155	0.00135054	-0.0312639	0.0421725	-0.019636	0.169364	-0.0236153	2.80481e-25	-0.0149378	0.00015512	-0.0118386	0.509632	-0.0254376	0.102976	0.00798334	0.885162	-0.0214583	0.0270535	5.97634e-51	0.000609197	TRUE	6
WP_THERMOGENESIS	-0.00410611	9.07597e-07	-0.00378349	0.00889005	-0.00827822	0.0637332	0.000535261	0.86607	-0.00223637	0.000158916	-0.00678609	1.59028e-06	-0.00300993	0.290614	-0.00892346	0.0169532	-0.000623249	0.92866	-0.00797026	0.00798549	2.841e-09	8.91379e-07	TRUE	6
YANG_BCL3_TARGETS_UP	-0.00756501	1.57621e-18	-0.00415741	0.0050848	-0.0049717	0.155525	-0.000759367	0.992635	-0.00731667	1.14845e-24	-0.00413473	0.00083361	-0.00559854	0.0326321	-0.00742412	0.220742	-0.000493111	0.97467	-0.00216228	0.569045	7.00125e-39	0.00493525	TRUE	6
YU_MYC_TARGETS_DN	-0.0100315	1.84517e-05	-0.0070794	0.111901	-0.0086184	0.418151	-0.0281917	0.00620277	-0.012368	2.95687e-13	-0.0105981	0.000134578	-0.00433718	0.0936667	-0.0237845	0.0407747	0.000321791	0.901005	-0.0081497	0.218501	3.78071e-16	0.000369047	TRUE	6
ZHAN_MULTIPLE_MYELOMA_LB_DN	-0.049991	1.50779e-36	-0.033156	9.31206e-07	-0.0471895	0.000344858	-0.0347752	0.100221	-0.0396844	3.7658e-54	-0.0311769	2.59144e-09	-0.0245072	0.0562254	-0.0261907	0.145063	-0.0162953	0.972906	-0.0343254	0.000446536	2.15546e-92	4.7433e-10	TRUE	6
ZHAN_MULTIPLE_MYELOMA_MF_DN	-0.0150056	2.64727e-11	-0.00262018	0.281017	-0.0122017	0.0302356	0.00154697	0.946434	-0.0190954	2.02285e-40	-0.0100843	6.39304e-05	-0.0121147	0.029873	-0.0104227	0.403942	-0.0256314	0.482345	-0.0197045	0.000963732	3.9217e-46	4.05092e-06	TRUE	6
ALCALAY_AML_BY_NPM1_LOCALIZATION_UP	-0.00390021	6.33735e-05	0.00181425	0.219113	-0.000101892	0.575554	0.000481158	0.870205	-0.00491914	3.92162e-16	-0.00418325	0.000156498	-0.00286431	0.0246535	-0.00443798	0.23301	-0.00207747	0.951003	-0.00632299	0.00115792	6.22734e-16	9.32721e-06	TRUE	5
ANASTASSIOU_MULTICANCER_INVASIVENESS_SIGNATURE	-0.00728117	6.31268e-12	0.00148768	0.952081	-0.00351964	0.895909	-0.0021529	0.810738	-0.0124336	1.61641e-52	-0.01146	4.00317e-09	-0.00673085	0.000703788	0.000604748	0.899804	-0.0102989	0.159652	-0.0157174	1.85839e-05	1.35144e-56	8.40428e-13	TRUE	5
ASTON_MAJOR_DEPRESSIVE_DISORDER_UP	-0.00716277	2.91312e-05	-0.00196933	0.677418	-0.0139596	0.0578431	-0.0172883	0.137505	-0.0175148	4.94898e-27	-0.0158069	3.18559e-07	-0.00958522	0.00204152	-0.0123911	0.124832	-0.00155978	0.893729	-0.0104479	0.0133041	1.15307e-27	2.73685e-08	TRUE	5
BENPORATH_ES_CORE_NINE_CORRELATED	-0.00467375	0.00447906	-0.00574291	0.197597	-0.00345186	0.459834	0.000374206	0.84275	-0.00493341	0.00118703	-0.00971026	0.0047015	-0.00611712	0.29292	-0.0168545	0.0105086	0.0162932	0.922009	-0.0156976	0.0214096	0.0010618	0.000813588	TRUE	5
BENPORATH_MYC_TARGETS_WITH_EBOX	-0.00758942	4.33826e-12	-0.00701518	6.45452e-06	-0.00476945	0.227301	0.000998511	0.951719	-0.00630745	2.15806e-17	-0.00636597	0.00101151	-0.00314549	0.104622	-0.00328448	0.291064	-0.00602581	0.513367	-0.0110421	0.00363044	2.12575e-28	0.000238192	TRUE	5
BILD_E2F3_ONCOGENIC_SIGNATURE	-0.00244794	4.06004e-07	-0.00267904	0.00667431	-0.000215693	0.611452	-0.00138317	0.760758	-0.00123424	1.2413e-05	-0.00431043	3.92912e-07	-0.0010117	0.127817	-0.00480687	0.228906	-0.000335522	0.943902	-0.00140543	0.198949	7.5791e-10	1.75926e-05	TRUE	5
BIOCARTA_WNT_PATHWAY	-0.00531485	0.00931972	-0.00333622	0.528739	-0.00447718	0.522607	0.00355286	0.965543	-0.0079145	2.03484e-05	-0.0122906	0.000910692	-0.00865107	0.0115509	-0.0141826	0.0739968	-0.00571924	0.789737	-0.0126228	0.0136877	0.000215934	5.25353e-05	TRUE	5
BLANCO_MELO_HUMAN_PARAINFLUENZA_VIRUS_3_INFECTION_A594_CELLS_DN	-0.000862761	0.00530734	0.000634129	0.950464	0.0029679	0.480883	-0.00527147	0.404867	-0.00188082	6.22629e-07	-0.00499538	6.76083e-09	-0.00531029	4.59737e-05	-0.00673816	0.111277	-0.00424478	0.535346	-0.00057805	0.208277	6.28571e-06	2.20718e-10	TRUE	5
[truncated: 3,639 more rows]

## Sheet: Median_norm_AUCell_Scores
clone	rep	condition	AIGNER_ZEB1_TARGETS	AKL_HTLV1_INFECTION_DN	ALCALAY_AML_BY_NPM1_LOCALIZATION_UP	ANASTASSIOU_MULTICANCER_INVASIVENESS_SIGNATURE	ANDERSEN_CHOLANGIOCARCINOMA_CLASS1	APRELIKOVA_BRCA1_TARGETS	ASGHARZADEH_NEUROBLASTOMA_POOR_SURVIVAL_DN	ASTON_MAJOR_DEPRESSIVE_DISORDER_UP	AZARE_STAT3_TARGETS	BANDRES_RESPONSE_TO_CARMUSTIN_WITHOUT_MGMT_48HR_DN	BASSO_CD40_SIGNALING_DN	BASSO_CD40_SIGNALING_UP	BAUS_TFF2_TARGETS_UP	BEIER_GLIOMA_STEM_CELL_DN	BENNETT_SYSTEMIC_LUPUS_ERYTHEMATOSUS	BENPORATH_ES_CORE_NINE_CORRELATED	BENPORATH_MYC_TARGETS_WITH_EBOX	BENPORATH_NANOG_TARGETS	BERENJENO_TRANSFORMED_BY_RHOA_REVERSIBLY_DN	BILD_E2F3_ONCOGENIC_SIGNATURE	BILD_MYC_ONCOGENIC_SIGNATURE	BIOCARTA_WNT_PATHWAY	BLANCO_MELO_BETA_INTERFERON_TREATED_BRONCHIAL_EPITHELIAL_CELLS_UP	BLANCO_MELO_HUMAN_PARAINFLUENZA_VIRUS_3_INFECTION_A594_CELLS_DN	BLANCO_MELO_HUMAN_PARAINFLUENZA_VIRUS_3_INFECTION_A594_CELLS_UP	BLANCO_MELO_RESPIRATORY_SYNCYTIAL_VIRUS_INFECTION_A594_CELLS_DN	BLANCO_MELO_RESPIRATORY_SYNCYTIAL_VIRUS_INFECTION_A594_CELLS_UP	BOGNI_TREATMENT_RELATED_MYELOID_LEUKEMIA_DN	BONCI_TARGETS_OF_MIR15A_AND_MIR16_1	BOQUEST_STEM_CELL_DN	BORCZUK_MALIGNANT_MESOTHELIOMA_DN	BOYLAN_MULTIPLE_MYELOMA_C_CLUSTER_DN	BROWNE_HCMV_INFECTION_10HR_UP	BROWNE_HCMV_INFECTION_12HR_UP	BROWNE_HCMV_INFECTION_1HR_DN	BROWNE_INTERFERON_RESPONSIVE_GENES	BURTON_ADIPOGENESIS_7	CAIRO_HEPATOBLASTOMA_UP	CAIRO_LIVER_DEVELOPMENT_UP	CHIARETTI_T_ALL_REFRACTORY_TO_THERAPY	CHNG_MULTIPLE_MYELOMA_HYPERPLOID_UP	CLASPER_LYMPHATIC_VESSELS_DURING_METASTASIS_DN	COULOUARN_TEMPORAL_TGFB1_SIGNATURE_UP	CROMER_TUMORIGENESIS_DN	CROMER_TUMORIGENESIS_UP	CROONQUIST_NRAS_SIGNALING_UP	DACOSTA_ERCC3_ALLELE_XPCS_VS_TTD_DN
[truncated: 20 more rows]
[truncated: 378 more columns]
