# Supplementary material for: Clonal transcriptomics identifies mechanisms of chemoresistance and empowers rational design of combination therapies
Source: bioRxiv preprint, doi:10.1101/2021.12.09.471927, version 2 (2022-06-10)
Supplement: Supplementary Table 7 [file 471927_file09.xlsx]

## Sheet: Geneset_correlation
# Values are mean AUCell Enrichment (clone compared to bulk tumour) across all vehicle experiments
	Clone 238	Clone 350	Clone 473	Clone 537	Clone 679	Clone 684	Clones 93&264&439	Correlation
logFC_abundance_JQ1_vs_Vehicle	0.0338076	0.296072	-2.63207	-1.86127	0.572782	-0.730807	1.60002	1
RIGGI_EWING_SARCOMA_PROGENITOR_DN	0.0297878	0.00520484	-0.137107	-0.0593463	0.0343635	0.0180716	0.140074	0.950701
OLSSON_E2F3_TARGETS_DN	0.0205488	0.0440468	-0.0476772	-0.00964183	0.0171569	-0.00858795	0.0805683	0.935658
GAZDA_DIAMOND_BLACKFAN_ANEMIA_PROGENITOR_DN	0.0526581	0.0341984	-0.0212787	-0.0197524	0.0502443	-0.0122895	0.102091	0.926995
PID_S1P_S1P3_PATHWAY	-0.00171421	0.0320833	-0.0712869	-0.014842	0.0282721	0.0194307	0.0565865	0.920589
GUTIERREZ_MULTIPLE_MYELOMA_UP	0.0293597	0.00335185	-0.0554946	-0.0358208	0.0829146	-0.0192611	0.0855724	0.916674
REACTOME_MTOR_SIGNALLING	0.050615	0.0259656	-0.0986884	-0.0361884	0.134584	-0.0350821	0.114145	0.915785
LIAO_HAVE_SOX4_BINDING_SITES	0.0403127	0.0256784	-0.153323	-9.56233e-06	0.103376	-0.024443	0.134457	0.91452
JAZAG_TGFB1_SIGNALING_DN	-0.00352063	0.0230191	-0.0965977	-0.0581983	0.117784	-0.026919	0.0841351	0.908233
RODWELL_AGING_KIDNEY_DN	0.0127297	0.0064127	-0.0394011	0.00065572	0.028694	0.0098921	0.0682434	0.907656
CHEN_LVAD_SUPPORT_OF_FAILING_HEART_DN	0.0082368	-0.000923089	-0.109643	-0.0995509	0.0948537	0.0260242	0.250441	0.906053
REACTOME_G_PROTEIN_MEDIATED_EVENTS	0.00213819	0.00320803	-0.0568771	-0.0194239	0.0410586	0.00503353	0.110168	0.905716
KEGG_RIBOSOME	-0.00133245	0.0020638	-0.00436811	-0.00376868	0.00634722	-0.000372799	0.00612298	0.903999
ALCALAY_AML_BY_NPM1_LOCALIZATION_UP	0.00920829	-0.0111325	-0.0868509	-0.0325464	0.079107	-0.000121374	0.0751156	0.903957
PID_IL8_CXCR1_PATHWAY	-0.002164	0.0379642	-0.0305191	-0.0329018	0.0728283	-0.00583376	0.0675175	0.897514
SCHAEFFER_PROSTATE_DEVELOPMENT_6HR_UP	7.8127e-05	0.00959936	-0.0553292	-0.00420376	0.027348	-0.0211654	0.0780538	0.8958
LIU_VMYB_TARGETS_UP	0.0495793	0.0172784	-0.0692482	-0.0288222	0.0469768	-0.040408	0.0486888	0.894998
BARRIER_COLON_CANCER_RECURRENCE_UP	0.0185776	0.00255758	-0.0254965	-0.0161109	0.0232728	0.0174557	0.0269966	0.893202
ROVERSI_GLIOMA_LOH_REGIONS	0.0382682	-0.00804543	-0.115886	-0.043949	0.146033	-0.0327838	0.261079	0.892743
WP_ANGIOGENESIS	0.089885	-0.0264645	-0.28576	-0.0390267	0.224232	-0.0979291	0.454891	0.89044
DELPUECH_FOXO3_TARGETS_DN	0.0413202	-0.00136556	-0.134063	-0.00505816	0.117739	0.0229345	0.250495	0.890141
MORI_PLASMA_CELL_UP	0.0762153	0.0273763	-0.169392	-0.00444182	0.0366605	0.0330023	0.158279	0.890126
LIU_BREAST_CANCER	0.00244552	0.00137133	-0.0575792	-0.00667971	0.0362206	-0.00203261	0.0995564	0.888594
HADDAD_T_LYMPHOCYTE_AND_NK_PROGENITOR_DN	-0.010035	-0.000797719	-0.0626079	-0.0420637	0.0874338	0.00620184	0.129508	0.886314
REACTOME_UNFOLDED_PROTEIN_RESPONSE_UPR	0.00796381	0.00462076	-0.0355456	0.000693507	0.0268381	0.00590266	0.0722079	0.885219
REACTOME_GLYCOSAMINOGLYCAN_METABOLISM	0.0552062	0.013666	-0.13927	0.00306614	0.0672318	-0.0568329	0.125482	0.882288
OLSSON_E2F3_TARGETS_UP	0.0216261	0.0645548	-0.161317	0.0164833	0.0345427	-0.0446983	0.181533	0.874312
HARRIS_BRAIN_CANCER_PROGENITORS	0.0535179	0.0121971	-0.427064	-0.0173869	0.0929278	0.0106642	0.229398	0.874262
RICKMAN_METASTASIS_UP	0.000655681	0.0168755	-0.0354586	-0.0469431	0.0756401	-0.0378531	0.112433	0.873841
WP_RAS_AND_BRADYKININ_PATHWAYS_IN_COVID19	0.00550091	-0.0119718	-0.13305	-0.0493878	0.0563124	0.000471764	0.272048	0.870741
BOYAULT_LIVER_CANCER_SUBCLASS_G1_DN	-0.00275632	-0.00100608	-0.150951	-0.0700363	0.233774	0.0271751	0.20538	0.868053
WP_FIBRIN_COMPLEMENT_RECEPTOR_3_SIGNALING_PATHWAY	-0.0335683	0.0280161	-0.162182	-0.0340638	0.173041	-0.0450815	0.368682	0.865718
REACTOME_MTORC1_MEDIATED_SIGNALLING	0.0368257	-0.00255085	-0.0951217	-0.0148265	0.100497	-0.0500709	0.0902603	0.862452
REACTOME_CD28_DEPENDENT_PI3K_AKT_SIGNALING	-0.125774	0.117798	-0.309012	-0.301049	0.357211	0.0382092	0.226906	0.862311
CHOW_RASSF1_TARGETS_UP	0.0594106	0.023156	-0.0178553	-0.033853	0.0432939	-0.0203708	0.137367	0.861961
BIOCARTA_CREB_PATHWAY	-0.00607683	0.093304	-0.113327	0.00787886	0.0511361	0.0547968	0.14008	0.860823
REACTOME_IRE1ALPHA_ACTIVATES_CHAPERONES	0.041089	0.00965967	-0.0566865	-0.0164007	-0.00236384	0.0156039	0.0851368	0.860694
BILANGES_RAPAMYCIN_SENSITIVE_GENES	0.000432591	0.018262	-0.0238816	0.00723549	0.0237268	-0.00846396	0.0491471	0.859943
GAVIN_FOXP3_TARGETS_CLUSTER_P6	0.0697333	0.0430002	-0.0606626	0.0357448	0.106355	-0.0240245	0.128811	0.858303
SMITH_LIVER_CANCER	0.062487	0.0528532	-0.110714	-0.00856882	0.0990029	0.00739898	0.0495593	0.857811
LOCKWOOD_AMPLIFIED_IN_LUNG_CANCER	0.0450824	0.00606599	-0.051897	-0.00704855	0.0502827	0.00851579	0.0370204	0.85685
CERVERA_SDHB_TARGETS_2	0.0589981	-0.0191722	-0.198839	0.0216419	0.119355	-0.0448456	0.27068	0.856167
REACTOME_SYNTHESIS_OF_IP3_AND_IP4_IN_THE_CYTOSOL	-0.00840713	0.000830448	-0.028503	-0.00837011	0.0158166	0.0109621	0.0263053	0.853926
REACTOME_PHASE_0_RAPID_DEPOLARISATION	-0.000509949	0.00553838	-0.0888537	0.00120939	0.0730627	-0.0157364	0.0630835	0.853518
WATANABE_RECTAL_CANCER_RADIOTHERAPY_RESPONSIVE_DN	0.00688636	0.00691082	-0.0576984	-0.00304431	-0.00114827	0.0052188	0.0710839	0.852473
LIAN_LIPA_TARGETS_3M	0.0114618	0.1296	-0.288387	0.0872779	0.180532	-0.0664695	0.459787	0.851851
PID_P53_REGULATION_PATHWAY	-0.0132883	0.0103589	-0.034438	-0.018804	-0.000515658	0.010761	0.0471717	0.8477
GROSS_HYPOXIA_VIA_ELK3_ONLY_DN	-0.0398121	0.0141486	-0.206004	-0.0152982	0.139406	0.0626809	0.182466	0.847644
JECHLINGER_EPITHELIAL_TO_MESENCHYMAL_TRANSITION_UP	0.0126451	0.0629543	-0.166467	0.0572959	0.10949	-0.0429853	0.256568	0.842155
FLOTHO_PEDIATRIC_ALL_THERAPY_RESPONSE_UP	-0.00589589	-0.00367619	-0.015594	-0.00486204	0.00747985	0.00136954	0.0189123	0.841404
MEBARKI_HCC_PROGENITOR_WNT_UP_CTNNB1_DEPENDENT_BLOCKED_BY_FZD8CRD	0.0469838	0.0107316	-0.138839	-0.146726	-0.0702519	-0.0364839	0.057068	0.838282
MA_MYELOID_DIFFERENTIATION_UP	0.0232492	0.0138386	-0.0872112	0.0216927	0.0470232	-0.0085462	0.0671997	0.837885
LEIN_CHOROID_PLEXUS_MARKERS	0.0247546	-0.0333334	-0.0839248	-0.0208475	0.117747	-0.021008	0.190774	0.836133
NAKAJIMA_MAST_CELL	0.0372331	0.00220554	-0.148354	-0.00759046	0.00848539	0.0306843	0.0951689	0.835846
SCHRAETS_MLL_TARGETS_DN	0.317169	-0.0362576	-0.278801	-0.0894867	0.188404	-0.124132	0.295398	0.833657
BIDUS_METASTASIS_DN	0.00702969	-0.0176809	-0.0631922	-0.0662416	0.0117641	0.0346848	0.055744	0.833606
CONCANNON_APOPTOSIS_BY_EPOXOMICIN_DN	-0.0060196	0.0263707	-0.0291871	-0.0144225	0.108524	-0.00496626	0.112909	0.833193
WP_BDNFTRKB_SIGNALING	0.0222064	0.015379	-0.0369443	-0.0462292	0.126909	-0.0545737	0.135797	0.832706
REACTOME_MISCELLANEOUS_TRANSPORT_AND_BINDING_EVENTS	0.179294	-0.148181	-0.563369	0.0408403	0.344113	-0.0399244	0.587306	0.831437
NABA_ECM_REGULATORS	0.0489003	0.0262496	-0.133332	0.0296325	0.0191521	0.0184486	0.192173	0.829738
WP_NEOVASCULARISATION_PROCESSES	-0.0548619	0.019671	-0.320698	0.00333991	0.128489	0.0853973	0.251449	0.828447
ROSS_LEUKEMIA_WITH_MLL_FUSIONS	0.05772	-0.0148794	-0.0769633	0.0129708	0.0455121	0.00456459	0.13938	0.825424
MEISSNER_BRAIN_HCP_WITH_H3K4ME2_AND_H3K27ME3	-0.280842	-0.0990542	-0.429763	-0.330377	0.479958	-0.311138	0.729172	0.824716
WP_LIPID_METABOLISM_PATHWAY	-0.0132339	0.0343514	-0.251598	0.0325717	0.318643	-0.03657	0.27942	0.823727
LAIHO_COLORECTAL_CANCER_SERRATED_UP	0.0300588	0.0137693	-0.107631	0.0231814	0.0243627	0.0130218	0.0901811	0.823027
MASSARWEH_TAMOXIFEN_RESISTANCE_DN	-0.0107096	-0.0255622	-0.0822072	-0.00497081	0.0537226	-0.000786812	0.116104	0.821557
KAYO_AGING_MUSCLE_DN	0.00091277	0.0127424	-0.0582169	0.0208269	0.0705782	-0.0194275	0.115082	0.820123
TAKEDA_TARGETS_OF_NUP98_HOXA9_FUSION_6HR_UP	-0.041627	-0.0574451	-0.125727	-0.0881746	0.150968	0.0258046	0.196636	0.819658
DAIRKEE_CANCER_PRONE_RESPONSE_BPA_E2	-0.00296564	0.00463943	-0.0424891	0.0113636	0.0618345	-0.00327845	0.0871416	0.81935
KEGG_N_GLYCAN_BIOSYNTHESIS	0.0919339	-0.0129067	-0.132293	-0.0108008	0.0273539	0.0514637	0.135079	0.818512
FLORIO_NEOCORTEX_BASAL_RADIAL_GLIA_DN	0.0654122	0.0746572	-0.0978921	-0.000362435	0.0198555	0.0278795	0.0563199	0.814652
FIGUEROA_AML_METHYLATION_CLUSTER_5_DN	-0.0443014	0.0598912	-0.0420608	-0.113687	0.156199	-0.0689617	0.210919	0.814513
HOLLERN_EMT_BREAST_TUMOR_UP	0.040266	0.0492954	-0.196833	0.0944731	0.124895	0.00260022	0.258093	0.814277
WP_SIGNAL_TRANSDUCTION_OF_S1P_RECEPTOR	0.0455133	0.0261895	-0.0184393	-0.116834	0.0224021	-0.0255721	0.136995	0.814063
POMEROY_MEDULLOBLASTOMA_DESMOPLASIC_VS_CLASSIC_UP	-0.000880109	0.0249848	-0.0463888	0.0148565	0.0752675	-0.0198636	0.0734179	0.813996
WP_PURINERGIC_SIGNALING	0.0228191	-0.00420611	-0.02248	-0.0206612	-0.00343299	0.00611909	0.0380184	0.813861
APPEL_IMATINIB_RESPONSE	-0.00975946	0.0501414	-0.0767824	-0.134357	-0.0336859	-0.00724658	0.057272	0.813099
BIOCARTA_NO1_PATHWAY	-0.0128862	0.0117866	-0.12958	0.0380237	0.161944	-0.00896096	0.215141	0.81135
REACTOME_CARGO_CONCENTRATION_IN_THE_ER	0.0221159	0.0133292	-0.115527	0.011941	0.142095	-0.0381382	0.094142	0.810318
REACTOME_COLLAGEN_BIOSYNTHESIS_AND_MODIFYING_ENZYMES	-0.00976834	-0.00507203	-0.195678	0.0470311	0.110827	0.00364912	0.317421	0.809594
CREIGHTON_ENDOCRINE_THERAPY_RESISTANCE_1	0.0305371	0.00589459	-0.0196549	0.00547949	0.0360089	-0.0201897	0.0493461	0.807438
WINTER_HYPOXIA_DN	0.138639	-0.184266	-0.515815	-0.045927	0.411255	0.00278177	0.363217	0.806911
RAO_BOUND_BY_SALL4_ISOFORM_A	0.00910378	-0.0252645	-0.0563637	-0.0491386	0.0996138	-0.0667416	0.203268	0.805803
GRABARCZYK_BCL11B_TARGETS_UP	0.0581699	-0.00731243	-0.166132	0.0424969	0.0442681	0.00500889	0.180109	0.805221
MULLIGHAN_NPM1_MUTATED_SIGNATURE_1_UP	-0.0262571	0.0208596	-0.0298571	-0.0392659	0.0836524	-0.0420308	0.128177	0.804443
CREIGHTON_ENDOCRINE_THERAPY_RESISTANCE_5	0.0222798	0.00350065	-0.0693214	0.0243398	0.0266448	-0.0115757	0.0794175	0.804265
KEGG_MTOR_SIGNALING_PATHWAY	-0.0259372	0.03281	-0.0777654	0.0239603	0.0972404	-0.0205707	0.202204	0.803689
VALK_AML_CLUSTER_9	0.0749291	0.122423	-0.524977	-0.101638	-0.134394	0.125023	0.325048	0.80281
GRADE_COLON_AND_RECTAL_CANCER_UP	0.00118175	0.00334945	-0.00689408	-0.0301281	0.0623634	-0.00332252	0.0770995	0.802576
LEE_LIVER_CANCER_MYC_E2F1_DN	0.154643	-0.191012	-0.194666	-0.548554	0.165725	-0.147759	0.518422	0.801977
TAKEDA_TARGETS_OF_NUP98_HOXA9_FUSION_3D_DN	-0.163287	0.482725	-3.28219	0.264774	0.424181	-0.583391	1.19229	0.801268
REACTOME_EUKARYOTIC_TRANSLATION_INITIATION	-0.00329656	0.0015009	-0.00441216	-0.00542308	0.0149838	-0.00427103	0.019467	0.798628
ZHAN_LATE_DIFFERENTIATION_GENES_UP	0.0515625	0.0085492	-0.120089	0.0122334	0.0209455	0.0392688	0.0831594	0.797794
WP_RELATIONSHIP_BETWEEN_INFLAMMATION_COX2_AND_EGFR	0.0323926	0.174679	-0.239894	0.0513435	0.00168955	0.10276	0.332745	0.797623
HAHTOLA_SEZARY_SYNDROM_UP	-0.0338434	0.0432104	-0.0474455	-0.000704509	0.0408433	-0.0162862	0.13977	0.794582
KEGG_NICOTINATE_AND_NICOTINAMIDE_METABOLISM	0.182137	-0.23204	-0.221753	-0.304413	0.511621	-0.170276	0.739522	0.79304
LEE_AGING_NEOCORTEX_DN	0.0286814	0.00735876	-0.10075	0.0168504	0.0441257	0.0222817	0.0513669	0.791366
CLASPER_LYMPHATIC_VESSELS_DURING_METASTASIS_DN	0.230005	-0.0734874	-0.488048	0.180871	0.289707	-0.034672	0.64784	0.789023
GAVIN_PDE3B_TARGETS	0.218835	-0.0382228	-0.953254	0.145404	0.063802	0.00777692	0.669303	0.788895
LU_AGING_BRAIN_DN	-0.0288	0.00793454	-0.030896	-0.0189312	0.0323052	0.0121414	0.0460182	0.788865
DAVIES_MULTIPLE_MYELOMA_VS_MGUS_DN	0.0316509	-0.00881394	-0.0320066	-0.00276336	0.0969406	-0.0296028	0.108406	0.787456
WP_ATM_SIGNALING_PATHWAY	-0.0254849	-0.00397828	-0.0369534	-0.0267643	0.000141828	-0.000424133	0.0775656	0.78655
REACTOME_METABOLISM_OF_VITAMINS_AND_COFACTORS	0.059973	0.01101	-0.213545	0.0656952	0.10546	0.00473185	0.145142	0.786426
SEIDEN_ONCOGENESIS_BY_MET	0.0104971	-0.0059147	-0.0653273	0.0231035	0.0316247	-0.000173461	0.113654	0.785607
YAO_TEMPORAL_RESPONSE_TO_PROGESTERONE_CLUSTER_8	-0.0849795	-0.0308366	-0.224464	0.0107049	0.152145	0.0146065	0.236924	0.78533
LEE_LIVER_CANCER_MYC_DN	0.053301	-0.0601824	-0.133191	0.0262663	0.181398	-0.0321839	0.312692	0.78401
BOQUEST_STEM_CELL_UP	0.0387076	-0.0140712	-0.236956	0.100995	0.176496	0.0301547	0.308337	0.782116
MAYBURD_RESPONSE_TO_L663536_UP	0.0154127	0.00499965	-0.0230581	-0.0818039	0.0741975	-0.0655788	0.263676	0.780849
TIEN_INTESTINE_PROBIOTICS_6HR_DN	0.020165	-0.0139542	-0.0461579	-0.00241801	0.0330127	-0.0250618	0.15597	0.780054
WP_HEPATITIS_C_AND_HEPATOCELLULAR_CARCINOMA	-0.0372533	0.00352466	-0.117303	0.0322458	0.137921	-0.00827405	0.188543	0.779088
TOOKER_GEMCITABINE_RESISTANCE_DN	-0.0188531	0.014182	-0.0775023	0.0283321	0.0657944	0.00167789	0.0923472	0.777472
THILLAINADESAN_ZNF217_TARGETS_UP	-0.00612565	-0.024016	-0.0601721	-0.0214183	0.127484	-0.0518885	0.149027	0.776848
CHEBOTAEV_GR_TARGETS_DN	0.159317	-0.0313991	-0.213889	-0.0304483	-0.00786104	0.0272654	0.161815	0.774596
RICKMAN_TUMOR_DIFFERENTIATED_MODERATELY_VS_POORLY_UP	0.0134282	0.01798	-0.0273133	0.0198814	0.025358	-0.0139376	0.0399745	0.774202
IVANOVA_HEMATOPOIESIS_LATE_PROGENITOR	0.0416381	-0.00139104	-0.0145075	-0.0190295	0.0717255	-0.0467205	0.109149	0.773478
HOLLERN_SOLID_NODULAR_BREAST_TUMOR_DN	-0.0192442	0.0303835	-0.127765	0.0701036	0.111506	0.0239226	0.241191	0.773324
LIM_MAMMARY_LUMINAL_MATURE_DN	-0.00133442	0.0667299	-0.137141	0.0378956	-0.00750069	0.00371427	0.16779	0.772516
GAVIN_FOXP3_TARGETS_CLUSTER_T4	0.0140606	-0.00418473	-0.0481826	0.0122976	0.0120381	0.0185422	0.0597384	0.77212
ZHONG_SECRETOME_OF_LUNG_CANCER_AND_MACROPHAGE	0.00670007	0.0163795	-0.0449463	0.0197829	0.0148635	0.00187759	0.0379115	0.771939
HEIDENBLAD_AMPLICON_8Q24_DN	-0.00671891	0.00447788	-0.0797052	0.0162957	0.0156037	0.00927456	0.0548947	0.770274
MARTORIATI_MDM4_TARGETS_NEUROEPITHELIUM_DN	-0.0679486	0.0125569	-0.0785834	-0.0120111	0.117976	-0.00424423	0.155723	0.769376
REACTOME_FCERI_MEDIATED_CA_2_MOBILIZATION	0.0133005	0.0158514	-0.0954554	0.02364	0.0195024	0.0374412	0.0776408	0.76894
FAELT_B_CLL_WITH_VH_REARRANGEMENTS_DN	0.0388125	0.00500535	-0.0402474	0.0203015	0.0233815	-0.0252909	0.111769	0.768143
WP_MITOCHONDRIAL_CIV_ASSEMBLY	0.00418538	-0.00197142	-0.0300077	0.00282362	0.0365902	-0.00728573	0.0200956	0.76682
MULLIGHAN_NPM1_SIGNATURE_3_UP	-0.0351848	0.0234617	-0.0321951	-0.0194254	0.0477338	-0.0427885	0.135055	0.765266
CHANDRAN_METASTASIS_DN	-0.0448492	0.0122568	-0.0781404	-0.00265127	0.0180352	0.0126661	0.0674465	0.764689
YAO_TEMPORAL_RESPONSE_TO_PROGESTERONE_CLUSTER_16	0.103938	-0.00559757	-0.0930048	-0.0721117	0.119127	0.0510314	0.0500208	0.763474
KYNG_ENVIRONMENTAL_STRESS_RESPONSE_NOT_BY_UV_IN_OLD	-0.0497637	-0.00478478	-0.107684	-0.0234281	0.158481	0.0331912	0.116389	0.761878
MULLIGHAN_MLL_SIGNATURE_2_UP	0.016765	-0.00395713	-0.0285808	0.00626388	0.0134567	0.00442823	0.0200142	0.761541
KORKOLA_YOLK_SAC_TUMOR	0.0616732	-0.132523	-0.238057	0.0435338	0.303612	-0.0729277	0.457343	0.757649
LIAN_LIPA_TARGETS_6M	0.0783835	0.148192	-0.163169	0.0506635	-0.0345594	-0.0738086	0.361833	0.757587
GRABARCZYK_BCL11B_TARGETS_DN	0.0129243	0.00270375	-0.00660191	0.000118916	0.0296317	-0.0199737	0.0467353	0.757019
ROZANOV_MMP14_TARGETS_DN	0.00207332	-0.0321831	-0.129638	0.000712085	-0.00275024	0.00397392	0.0613187	0.756991
AIYAR_COBRA1_TARGETS_UP	0.0886297	-0.0326502	-0.14726	0.0390798	0.0848921	0.0384257	0.134371	0.756949
WILLIAMS_ESR2_TARGETS_UP	0.0814035	-0.131651	-0.150047	-0.105702	0.386512	-0.067383	0.339015	0.755883
WORSCHECH_TUMOR_EVASION_AND_TOLEROGENICITY_UP	-0.130518	0.0235608	-0.14887	-0.0293656	0.100343	-0.0387931	0.43391	0.755878
WP_HYPOTHESIZED_PATHWAYS_IN_PATHOGENESIS_OF_CARDIOVASCULAR_DISEASE	-0.0558812	0.0547869	-0.146325	-0.134137	-0.0637145	-0.0637651	0.513466	0.755452
LINDGREN_BLADDER_CANCER_CLUSTER_1_DN	0.0581332	0.029396	-0.0529519	0.0298153	0.0219528	-0.0130222	0.0613878	0.754585
ZHAN_MULTIPLE_MYELOMA_CD1_AND_CD2_UP	0.0102641	-0.00677282	-0.0573634	0.0218634	0.0353714	-0.0381837	0.100399	0.754227
CHIANG_LIVER_CANCER_SUBCLASS_UNANNOTATED_DN	0.0168474	0.00867942	-0.00230199	-0.00323722	0.0493546	0.00760076	0.0277679	0.754182
BAE_BRCA1_TARGETS_UP	0.00374755	0.00302975	-0.0257499	0.00498541	0.000393906	0.011137	0.0256453	0.753704
WP_TYPE_I_COLLAGEN_SYNTHESIS_IN_THE_CONTEXT_OF_OSTEOGENESIS_IMPERFECTA	0.00499236	0.0249511	-0.167881	0.0767138	0.0454308	-0.015444	0.198942	0.753422
REACTOME_SRP_DEPENDENT_COTRANSLATIONAL_PROTEIN_TARGETING_TO_MEMBRANE	0.00377326	0.00536279	-0.0125976	-0.0032505	0.00445765	0.00899167	0.00412304	0.752503
GINESTIER_BREAST_CANCER_ZNF217_AMPLIFIED_UP	-0.07593	-0.00514971	-0.0965588	-0.00105151	0.121765	-0.0203384	0.193815	0.751722
WATANABE_RECTAL_CANCER_RADIOTHERAPY_RESPONSIVE_UP	-0.000264338	0.00196886	-0.0229728	0.0161837	0.0532454	-0.007004	0.0729548	0.75164
CHUNG_BLISTER_CYTOTOXICITY_UP	0.0191794	-0.00284898	-0.0503498	0.0207533	0.066968	0.00256844	0.0498803	0.751126
BHAT_ESR1_TARGETS_NOT_VIA_AKT1_DN	-0.0671956	0.0278084	-0.143831	-0.0898347	-0.0632413	0.0445586	0.281926	0.750824
DOANE_RESPONSE_TO_ANDROGEN_DN	-0.0231966	-0.00503635	-0.0379084	0.00221349	0.0203667	-0.0121034	0.066115	0.750332
BLANCO_MELO_COVID19_BRONCHIAL_EPITHELIAL_CELLS_SARS_COV_2_INFECTION_DN	0.0739255	-0.11818	-0.274371	-0.0264188	-0.0569496	-0.114111	0.253639	0.748415
REACTOME_THE_CITRIC_ACID_TCA_CYCLE_AND_RESPIRATORY_ELECTRON_TRANSPORT	-0.017998	0.0035842	-0.0483505	-0.0244029	0.0628827	-0.00758246	0.0146439	0.747926
IVANOVA_HEMATOPOIESIS_MATURE_CELL	0.0341997	-0.0125872	-0.0962271	0.00336266	-0.0143282	0.0327364	0.109387	0.746842
NIKOLSKY_BREAST_CANCER_8Q12_Q22_AMPLICON	-0.000453268	0.0515307	-0.129433	0.030829	0.0366285	0.022219	0.0570831	0.746516
WP_ELECTRON_TRANSPORT_CHAIN_OXPHOS_SYSTEM_IN_MITOCHONDRIA	-0.0212919	0.00612004	-0.0443422	-0.0190364	0.0500523	-0.00477476	0.0122768	0.745098
MIKKELSEN_ES_ICP_WITH_H3K4ME3	-0.0266834	-0.0140178	-0.0545992	0.000743474	0.010763	-0.00955554	0.0421366	0.744794
KIM_ALL_DISORDERS_CALB1_CORR_DN	0.0147397	0.0616119	-1.18443	-0.015208	0.10359	0.145585	0.1909	0.742204
REACTOME_ACTIVATION_OF_THE_MRNA_UPON_BINDING_OF_THE_CAP_BINDING_COMPLEX_AND_EIFS_AND_SUBSEQUENT_BINDING_TO_43S	-0.00813987	0.005125	-0.00143834	-0.0109917	0.0275477	-0.00554692	0.0394054	0.741556
REACTOME_PURINERGIC_SIGNALING_IN_LEISHMANIASIS_INFECTION	0.00369281	0.00834608	-0.128203	0.0180293	-0.0319019	-0.0229229	0.100194	0.741228
GYORFFY_DOXORUBICIN_RESISTANCE	-0.0198839	-0.0021869	-0.1078	0.022937	0.00301675	0.00843215	0.112944	0.741061
WP_MITOCHONDRIAL_COMPLEX_I_ASSEMBLY_MODEL_OXPHOS_SYSTEM	-0.0185345	0.0178279	-0.085778	-0.0129788	0.124166	-0.0239098	0.0409757	0.741008
PID_P75_NTR_PATHWAY	-0.0257472	0.0211787	-0.059002	0.019157	0.0378263	-0.00518854	0.0532356	0.740315
MAGRANGEAS_MULTIPLE_MYELOMA_IGLL_VS_IGLK_UP	-0.020357	-0.0209195	-0.0914159	0.012723	0.0389201	-0.0690463	0.190623	0.740242
KUNINGER_IGF1_VS_PDGFB_TARGETS_DN	0.192313	-0.120418	-0.188298	-0.0178866	0.171526	-0.00406981	0.214929	0.740141
REACTOME_DAG_AND_IP3_SIGNALING	-0.0131312	0.00337998	-0.0902926	0.0450507	0.0569693	-0.0138111	0.123205	0.740048
CAIRO_PML_TARGETS_BOUND_BY_MYC_UP	0.00762316	0.0107535	-0.0346803	0.0358582	0.0550153	0.00308684	0.0763519	0.739992
AFFAR_YY1_TARGETS_DN	0.0528137	0.0400429	-0.00266435	-0.0626083	0.116926	-0.0589038	0.0832222	0.739533
IVANOVA_HEMATOPOIESIS_INTERMEDIATE_PROGENITOR	0.0160695	0.00495738	-0.0193544	-0.0179695	0.123187	-0.025185	0.0837276	0.739217
KAYO_CALORIE_RESTRICTION_MUSCLE_DN	0.0228605	0.00907275	-0.0408845	0.035662	0.0330397	-0.0171388	0.0898456	0.73901
HUANG_FOXA2_TARGETS_DN	0.0565001	0.0756152	-0.346601	0.111741	0.0637155	0.067226	0.207607	0.738872
REACTOME_EUKARYOTIC_TRANSLATION_ELONGATION	-0.00168109	0.00141752	-0.00288035	0.000756097	0.00343954	0.000398949	0.00323815	0.738792
VANHARANTA_UTERINE_FIBROID_WITH_7Q_DELETION_UP	0.0560412	0.00754834	-0.0133589	-0.0152005	0.100986	-0.0581609	0.101964	0.738284
WP_CELL_MIGRATION_AND_INVASION_THROUGH_P75NTR	-0.0360038	0.0119638	-0.0671041	0.027586	0.135548	-0.0162306	0.158479	0.737713
TAKEDA_TARGETS_OF_NUP98_HOXA9_FUSION_8D_DN	-0.00837797	-0.00449814	-0.124974	0.0369137	0.0107571	0.0190891	0.163309	0.737274
BIOCARTA_HDAC_PATHWAY	-0.0424857	0.0380726	-0.0701025	0.0127884	0.0622708	0.00558821	0.0618814	0.736304
LUI_THYROID_CANCER_CLUSTER_2	0.0119136	0.00700828	-0.151098	0.016716	-0.0198174	-0.00666589	0.0618843	0.735722
GARGALOVIC_RESPONSE_TO_OXIDIZED_PHOSPHOLIPIDS_BLACK_UP	-0.0480634	-0.00897013	-0.238416	0.0419675	0.00232356	0.00831404	0.178863	0.735578
FERREIRA_EWINGS_SARCOMA_UNSTABLE_VS_STABLE_UP	0.0721626	0.0549985	-0.0110029	0.0408496	0.17437	-0.0100597	0.112448	0.735494
FLECHNER_PBL_KIDNEY_TRANSPLANT_OK_VS_DONOR_DN	0.00579555	-0.00356315	-0.0294241	-0.0144954	-0.0166759	0.00719921	0.0208606	0.73474
SETLUR_PROSTATE_CANCER_TMPRSS2_ERG_FUSION_UP	-0.0984644	0.0259462	-0.110551	0.0321749	0.179098	4.74563e-05	0.385435	0.73401
REACTOME_NEUROTRANSMITTER_RELEASE_CYCLE	0.0373324	0.0188904	-0.143472	0.0385335	0.0103249	0.0272739	0.085115	0.733265
VANTVEER_BREAST_CANCER_METASTASIS_DN	0.0815235	-0.0136067	-0.0528765	-0.0260134	0.0714812	-0.133426	0.301812	0.731983
HASLINGER_B_CLL_WITH_13Q14_DELETION	-0.062098	-0.00845738	-0.184127	0.0369242	0.00686497	-0.0188251	0.216156	0.730966
BERNARD_PPAPDC1B_TARGETS_UP	0.0108522	-0.0290085	-0.0181033	-0.0272751	0.102024	-0.0419304	0.212807	0.727073
ACEVEDO_LIVER_CANCER_WITH_H3K27ME3_DN	-0.0650454	-0.0108923	-0.0545341	-0.0431819	0.0944083	-0.00226681	0.0902702	0.726923
WP_FACTORS_AND_PATHWAYS_AFFECTING_INSULINLIKE_GROWTH_FACTOR_IGF1AKT_SIGNALING	-0.0546994	0.0389559	-0.109892	0.0394257	0.0412466	0.037315	0.193992	0.726742
TING_SILENCED_BY_DICER	0.0805043	0.0814845	-0.215271	0.0986023	0.0278267	0.0572201	0.175928	0.726596
PID_E2F_PATHWAY	0.0586269	-0.00668104	-0.0869591	-0.0535687	0.0892378	0.00255043	0.00310227	0.72659
SUNG_METASTASIS_STROMA_UP	0.0534816	-0.00350451	-0.0801239	0.0312608	-0.00274012	0.00597596	0.135777	0.726288
YAO_TEMPORAL_RESPONSE_TO_PROGESTERONE_CLUSTER_13	-0.0131036	0.00965583	-0.0478016	-0.0134854	0.0398053	-0.0028815	0.000854015	0.726283
KEGG_PARKINSONS_DISEASE	-0.00820068	-0.00187075	-0.0348065	-0.018161	0.065495	-0.00586197	0.0207486	0.723935
PID_HNF3B_PATHWAY	-0.0289818	0.0607791	-0.158317	0.00246479	0.0992096	0.04828	0.0379872	0.722988
MULLIGHAN_MLL_SIGNATURE_1_UP	0.0144788	-0.00650161	-0.0273223	-0.00892656	0.04218	0.000980428	0.011551	0.722761
GOZGIT_ESR1_TARGETS_UP	0.0926648	-0.0244326	-0.138347	0.000813609	0.00815917	-0.000656504	0.0639594	0.72276
JIANG_HYPOXIA_NORMAL	-0.0188273	-0.00110638	-0.0740416	0.0381208	0.0639181	-0.0110095	0.105716	0.722518
REACTOME_RESPIRATORY_ELECTRON_TRANSPORT_ATP_SYNTHESIS_BY_CHEMIOSMOTIC_COUPLING_AND_HEAT_PRODUCTION_BY_UNCOUPLING_PROTEINS	-0.0158333	0.00528335	-0.0461027	-0.0242433	0.0563474	-0.00659942	0.00520148	0.722164
MCBRYAN_PUBERTAL_BREAST_6_7WK_DN	0.139065	-0.0860763	-0.0899229	-0.0272517	0.112089	0.0374256	0.178658	0.722017
BHAT_ESR1_TARGETS_VIA_AKT1_DN	0.000310163	0.0160889	-0.107002	-0.00540799	-0.0262672	0.0356868	0.346696	0.721311
WANG_RESPONSE_TO_BEXAROTENE_UP	0.0745311	-0.0473225	-0.0719098	0.0293336	0.216205	-0.116377	0.358945	0.719792
PECE_MAMMARY_STEM_CELL_UP	0.0136061	-0.000508998	-0.00919015	0.00333034	0.0251983	-0.00455059	0.0154924	0.71964
KEGG_ALZHEIMERS_DISEASE	-0.0164625	0.00838805	-0.0339942	-0.0290742	0.0667469	-0.00738388	0.0166116	0.719308
UDAYAKUMAR_MED1_TARGETS_UP	0.0251139	-0.0104556	-0.0294106	0.00767092	0.12255	-0.0431626	0.118549	0.71898
PID_HEDGEHOG_GLI_PATHWAY	-0.0230441	-0.00470103	-0.0594082	-0.0155923	0.0758018	0.0164427	0.0315983	0.718298
CHEN_ETV5_TARGETS_SERTOLI	-0.0183325	-0.00408118	-0.0222907	0.00623262	0.0897301	0.00814759	0.208728	0.717494
HEIDENBLAD_AMPLICON_12P11_12_UP	0.28826	0.0531165	-0.1337	-0.108915	0.115027	-0.0899988	0.0996328	0.714973
JOHNSTONE_PARVB_TARGETS_3_DN	0.0100886	0.0170399	-0.0145696	0.0254743	0.0712251	-0.038115	0.139709	0.714241
WANG_LMO4_TARGETS_UP	0.0148799	0.000106613	-0.0310242	0.0187592	0.00797119	-0.00582095	0.0437075	0.714059
LANDIS_ERBB2_BREAST_PRENEOPLASTIC_DN	0.0093643	-0.00783151	-0.0232161	0.000783709	0.13553	-0.0567365	0.162853	0.713618
WP_GASTRIC_CANCER_NETWORK_1	0.15336	0.286136	0.0722567	-0.623388	0.369106	-0.0631662	0.423847	0.713552
HORIUCHI_WTAP_TARGETS_DN	0.0502947	0.0321074	0.000766168	0.0371694	0.071176	-0.0199442	0.0863286	0.713408
ALONSO_METASTASIS_UP	0.0125854	0.0178474	-0.0622318	0.0114335	0.0190695	0.00359776	0.0113705	0.713263
SHIPP_DLBCL_VS_FOLLICULAR_LYMPHOMA_UP	-0.0102834	0.00957772	-0.0263028	0.0096986	0.0460815	-0.00195234	0.0306387	0.712997
FAELT_B_CLL_WITH_VH3_21_DN	0.0400724	-0.00931495	-0.0586333	0.0492987	0.0560225	-0.0136087	0.114493	0.711674
KEGG_CALCIUM_SIGNALING_PATHWAY	0.00082067	-0.0104093	-0.00863969	-0.0094074	0.0636068	-0.0254732	0.0882588	0.711571
ZHAN_MULTIPLE_MYELOMA_HP_DN	0.0645025	0.024166	-0.163837	0.0217622	0.0593645	0.0401361	0.0357947	0.711365
REACTOME_MITOTIC_SPINDLE_CHECKPOINT	0.0323902	0.0309482	0.00555619	-0.0187383	0.0188859	-0.0175547	0.0356019	0.710915
KRASNOSELSKAYA_ILF3_TARGETS_DN	0.081641	-0.0160532	0.00610445	-0.338465	0.280286	-0.109416	0.264207	0.709665
PID_HIF2PATHWAY	-0.0316109	-0.0178208	-0.121813	0.0886255	0.181614	-0.0147576	0.348929	0.708733
KIM_WT1_TARGETS_8HR_DN	-0.017938	0.00886227	0.00131963	-0.0190215	0.0834454	-0.0185119	0.119578	0.707737
MODY_HIPPOCAMPUS_POSTNATAL	-0.0296092	-0.0120474	-0.0372864	0.00119506	0.0477611	-0.00482631	0.0653104	0.707608
WINNEPENNINCKX_MELANOMA_METASTASIS_UP	0.0549615	0.060101	-0.0521513	0.0756849	0.0877954	0.010508	0.0801603	0.707494
ROSS_AML_WITH_CBFB_MYH11_FUSION	0.00149957	0.101653	-0.216204	0.0893832	-0.0267658	0.0792277	0.309917	0.707132
SHETH_LIVER_CANCER_VS_TXNIP_LOSS_PAM3	0.0846359	0.018915	-0.0746881	0.0683278	0.0191862	-0.00546448	0.198187	0.706803
REACTOME_COPII_MEDIATED_VESICLE_TRANSPORT	0.0576473	-0.00289643	-0.0454286	0.00718939	0.101498	-0.0281519	0.0517653	0.706604
REACTOME_NICOTINATE_METABOLISM	0.114999	-0.0678601	-0.390679	0.194417	0.0536426	-0.0228781	0.737869	0.706063
WP_TYPE_2_PAPILLARY_RENAL_CELL_CARCINOMA	-0.031269	-0.0343048	-0.121402	0.0770196	0.183783	-0.0121116	0.327241	0.70575
REACTOME_ASPARAGINE_N_LINKED_GLYCOSYLATION	0.017508	0.0024483	-0.033314	0.0144961	0.0470798	-0.00381474	0.0229638	0.705605
THEILGAARD_NEUTROPHIL_AT_SKIN_WOUND_DN	-0.0152754	0.00827659	-0.0222727	0.0078087	0.00838594	0.00288952	0.0390424	0.70557
LASTOWSKA_COAMPLIFIED_WITH_MYCN	-0.0242742	0.0146613	-0.0468769	0.0568005	0.200327	-0.0482123	0.39588	0.704536
WONG_EMBRYONIC_STEM_CELL_CORE	0.015527	0.0253467	0.000584329	-0.0163709	0.104733	0.00272087	0.0533468	0.703434
PID_MAPK_TRK_PATHWAY	0.0434336	0.0280874	-0.0825106	-0.113159	-0.0453428	0.044636	0.0428569	0.703075
GREENBAUM_E2A_TARGETS_UP	0.028227	-0.0216481	-0.0655325	0.0389872	0.242251	-0.138303	0.37987	0.703004
WP_TRANSLATION_FACTORS	-0.00300496	0.00241634	-0.00579342	0.0083959	0.0477827	-0.0103825	0.110334	0.702976
REACTOME_RESPIRATORY_ELECTRON_TRANSPORT	-0.0225512	0.00176235	-0.0491516	-0.0215661	0.0670818	-0.00827559	0.012586	0.70249
WANG_METASTASIS_OF_BREAST_CANCER_ESR1_DN	0.00140551	-0.128837	-0.0950169	-0.0896895	0.0653597	-0.0113054	0.116095	0.702152
KEGG_RENAL_CELL_CARCINOMA	-0.0270305	0.0366923	-0.0871523	0.0235659	0.0152547	0.0459536	0.0855762	0.701874
WIERENGA_PML_INTERACTOME	-0.000321188	0.0115054	-0.0207757	0.0209724	0.102448	-0.0115893	0.08638	0.701773
DAZARD_UV_RESPONSE_CLUSTER_G6	-0.0662089	0.0250209	-0.0466484	-0.0128129	0.0347435	-0.0454431	0.199294	0.701631
WP_FOLLICLE_STIMULATING_HORMONE_FSH_SIGNALING_PATHWAY	-0.121356	0.00837998	-0.131977	0.0134662	0.141681	0.0537487	0.229544	0.700923
HOWLIN_CITED1_TARGETS_1_DN	0.0849189	-0.0890917	-0.0932469	-0.0758098	0.130256	0.00532373	0.0786475	0.700626
BOYAULT_LIVER_CANCER_SUBCLASS_G3_UP	-0.00575054	0.00922075	-0.00549911	-0.017572	0.108527	-0.0225203	0.086231	0.699977
WP_NONALCOHOLIC_FATTY_LIVER_DISEASE	-0.0274774	0.0115423	-0.0447538	-0.00773549	0.101786	-0.011858	0.0496659	0.698931
KYNG_ENVIRONMENTAL_STRESS_RESPONSE_UP	0.00290262	0.000446862	-0.0430928	0.0440694	0.06293	0.000947169	0.102849	0.698674
BLALOCK_ALZHEIMERS_DISEASE_INCIPIENT_UP	-0.00148581	0.0024335	-0.0484593	-0.012911	-0.0361808	-0.00226114	0.0480342	0.698574
JOSEPH_RESPONSE_TO_SODIUM_BUTYRATE_UP	-0.0143059	-0.0184755	-0.119564	-0.0251882	0.0621997	0.049316	0.0203414	0.697733
DITTMER_PTHLH_TARGETS_UP	-0.00339995	0.00989259	-0.0666369	0.019509	0.0304998	0.0190075	0.0293718	0.697669
KYNG_WERNER_SYNDROM_AND_NORMAL_AGING_UP	0.0137755	-0.0220074	-0.0460265	0.0119232	0.0141762	-0.0388128	0.128021	0.697585
GENTILE_UV_RESPONSE_CLUSTER_D8	-0.120123	0.00275564	-0.0910348	-0.0145336	0.144399	0.00386067	0.205009	0.697544
GOLDRATH_IMMUNE_MEMORY	0.0705043	-0.0441284	-0.224654	0.112207	0.188276	-0.0558504	0.198439	0.697415
VALK_AML_CLUSTER_3	-0.101191	0.0361487	-0.194353	-0.0567738	0.263447	0.0445439	0.080543	0.69724
BURTON_ADIPOGENESIS_7	0.0303337	-0.0100778	-0.0964601	0.0569872	0.0558925	0.00402351	0.0943955	0.696086
WESTON_VEGFA_TARGETS_6HR	0.0461424	-0.0196677	-0.0708784	0.0431814	0.0438932	-0.064946	0.195398	0.695728
GOLDRATH_ANTIGEN_RESPONSE	0.0168763	-0.00188226	-0.0358246	0.0122013	0.0118356	0.00834733	0.0199154	0.694562
FURUKAWA_DUSP6_TARGETS_PCI35_DN	0.113861	0.0897244	-0.0439478	0.0298276	0.0508284	-0.0409758	0.075253	0.693329
FONTAINE_FOLLICULAR_THYROID_ADENOMA_UP	-0.02772	-0.000555006	-0.0426713	-0.0280364	0.033417	0.0322665	0.0240637	0.692567
HOFFMANN_PRE_BI_TO_LARGE_PRE_BII_LYMPHOCYTE_UP	0.0407243	-0.0176337	-0.150288	-0.0266562	-0.076577	0.04369	0.131351	0.692516
GUILLAUMOND_KLF10_TARGETS_DN	0.0365516	-0.0251792	-0.0450987	0.0308453	0.114738	0.000887101	0.102755	0.692178
REACTOME_CA_DEPENDENT_EVENTS	-0.0412012	0.0031818	-0.0993064	0.0516804	0.106277	-0.00608144	0.12554	0.689966
FRASOR_RESPONSE_TO_ESTRADIOL_UP	-0.114501	0.0247294	-0.238145	0.0695195	0.161152	0.0394596	0.182274	0.689835
SMIRNOV_RESPONSE_TO_IR_6HR_DN	-0.0774494	0.00534929	-0.0891354	0.0312679	0.0987698	-0.04214	0.176628	0.689408
HOWLIN_PUBERTAL_MAMMARY_GLAND	-0.0975363	-0.0204422	-0.100778	0.0294261	0.153107	-0.0216575	0.295877	0.688947
BURTON_ADIPOGENESIS_6	0.0370288	-0.0124198	-0.0403241	-0.0356257	0.101376	-0.0483558	0.0337724	0.688937
WAKABAYASHI_ADIPOGENESIS_PPARG_RXRA_BOUND_8D	0.00626375	0.0161388	-0.0355965	0.00155312	-0.00314071	-0.000151067	0.00512243	0.688788
KEGG_OXIDATIVE_PHOSPHORYLATION	-0.0184415	0.00527432	-0.0443139	-0.0185795	0.055808	0.00536983	0.00736669	0.688735
IKEDA_MIR133_TARGETS_UP	-0.0390001	0.00127722	-0.0169592	-0.0112464	0.0628161	-0.0207362	0.195696	0.688182
REACTOME_NEGATIVE_EPIGENETIC_REGULATION_OF_RRNA_EXPRESSION	-0.0142073	0.00539352	-0.0116453	-0.0243582	0.0491976	0.0295118	0.0391596	0.688108
WHITFIELD_CELL_CYCLE_M_G1	-0.000404101	0.00684723	-0.0575759	0.0340713	0.0395712	0.0316299	0.0619129	0.687905
CHEOK_RESPONSE_TO_MERCAPTOPURINE_AND_HD_MTX_DN	-0.186556	0.105066	-0.231515	-0.127706	0.595313	-0.186086	0.25892	0.687638
WP_G13_SIGNALING_PATHWAY	0.00557469	0.0236227	-0.0170566	0.0129632	-0.000620401	-0.0154115	0.10048	0.687348
LANDIS_BREAST_CANCER_PROGRESSION_DN	-0.0695021	0.027604	-0.0794478	0.0346614	0.0504796	0.00544099	0.18307	0.687086
LIM_MAMMARY_LUMINAL_PROGENITOR_UP	0.186327	0.0234121	-0.286156	0.221101	0.0793779	-0.138094	0.536047	0.686351
ZHAN_MULTIPLE_MYELOMA_MS_DN	-0.0321347	0.0121832	-0.0177664	0.00167419	0.0463912	-0.0122161	0.0701748	0.685347
HOLLEMAN_VINCRISTINE_RESISTANCE_ALL_UP	-0.0207882	-0.00716682	-0.0335525	0.000151457	0.115726	-0.106187	0.326401	0.685344
MULLIGHAN_NPM1_MUTATED_SIGNATURE_2_UP	0.0484833	0.0212809	-0.00879007	-0.0783774	-0.0200381	-0.0310245	0.0750891	0.685303
KYNG_DNA_DAMAGE_DN	-0.0221578	-0.00127731	-0.0284187	0.0165457	0.0449199	-0.013713	0.086565	0.685032
RUAN_RESPONSE_TO_TROGLITAZONE_UP	-0.0166735	-0.0248698	-0.0285791	-0.104517	0.229875	0.0186613	0.142079	0.684593
REACTOME_FCGR3A_MEDIATED_IL10_SYNTHESIS	-0.0220939	-0.00085086	-0.067932	0.0399719	0.0718386	-0.0228518	0.0918994	0.68287
REACTOME_RHOD_GTPASE_CYCLE	0.0237809	-0.029324	-0.0103231	-0.0394239	0.129785	-0.0995555	0.194988	0.682802
WP_RESISTIN_AS_A_REGULATOR_OF_INFLAMMATION	-0.152268	0.0472886	-0.192433	0.00269871	0.113188	0.0541504	0.14045	0.682516
SHEDDEN_LUNG_CANCER_POOR_SURVIVAL_A6	0.0767963	0.0400018	0.0164113	-0.0147455	0.154234	-0.0219118	0.0878313	0.68169
LANDIS_ERBB2_BREAST_TUMORS_65_DN	-0.120352	0.0293141	-0.244084	0.0785632	0.0255604	0.0286212	0.293083	0.681332
BOHN_PRIMARY_IMMUNODEFICIENCY_SYNDROM_UP	0.00625932	0.00830057	-0.0517757	0.0710133	0.122822	-0.0149676	0.159344	0.680402
CHIARADONNA_NEOPLASTIC_TRANSFORMATION_KRAS_UP	-0.0512335	0.0137407	-0.0998655	0.0708792	0.0955861	0.0173721	0.195618	0.679826
HONMA_DOCETAXEL_RESISTANCE	-0.0205822	0.0128934	-0.0110696	-0.00488145	0.044456	0.00984683	0.0361552	0.678534
KEGG_ADIPOCYTOKINE_SIGNALING_PATHWAY	-0.0872966	0.0112784	-0.170083	0.0681128	0.160452	0.0491112	0.18428	0.678125
BENPORATH_SUZ12_TARGETS	-0.000197031	-0.0467356	-0.0740507	0.00533696	-0.00142046	0.00641109	0.123201	0.677908
LIEN_BREAST_CARCINOMA_METAPLASTIC_VS_DUCTAL_UP	0.0442993	-0.0496895	-0.0591683	0.0655929	0.232869	-0.0498115	0.30532	0.677865
CHIANG_LIVER_CANCER_SUBCLASS_CTNNB1_DN	0.0630991	-0.0215149	-0.113426	0.0314392	0.0450857	0.0028475	0.0506691	0.676821
HU_GENOTOXIC_DAMAGE_4HR	-0.0225745	0.0607848	-0.0309254	0.0248319	0.0435581	-0.0310269	0.0771149	0.676632
RODRIGUES_THYROID_CARCINOMA_POORLY_DIFFERENTIATED_UP	0.0439472	0.000515141	-0.00217133	0.012715	0.0940156	-0.0521046	0.124488	0.676615
MCCLUNG_COCAIN_REWARD_4WK	-0.211464	-0.0400064	-0.217174	-0.00573472	0.139638	0.0743827	0.362445	0.676537
CHIANG_LIVER_CANCER_SUBCLASS_POLYSOMY7_DN	-0.141004	0.112992	-0.243638	0.12252	0.026306	-0.0946427	0.578524	0.67532
SHEPARD_CRASH_AND_BURN_MUTANT_DN	0.00500575	0.00569243	-0.00884984	-0.029409	-0.0118132	-0.0344269	0.0368562	0.674968
PID_THROMBIN_PAR1_PATHWAY	0.00626578	0.0167384	-0.00532585	0.00463559	0.0164998	-0.0321171	0.126887	0.674865
WINTER_HYPOXIA_UP	-0.00197723	-0.028689	-0.0328538	0.00496823	0.0886786	-0.0441722	0.105498	0.67477
LIN_MELANOMA_COPY_NUMBER_DN	0.0391985	0.0239323	-0.0853502	0.0526821	0.00968571	-0.00525669	0.0756507	0.674672
BUFFA_HYPOXIA_METAGENE	-0.0126593	-0.0079642	-0.0612268	0.0432521	0.0705603	-0.0409988	0.119066	0.673939
ICHIBA_GRAFT_VERSUS_HOST_DISEASE_D7_DN	0.0129979	-0.0289519	-0.0530194	0.027484	0.0752318	-0.0448125	0.100347	0.673768
MCGARVEY_SILENCED_BY_METHYLATION_IN_COLON_CANCER	0.352063	-0.100777	-0.435559	0.161681	0.441762	-0.567787	0.612734	0.673189
REACTOME_THE_PHOTOTRANSDUCTION_CASCADE	-0.00071211	-0.00567998	-0.0379787	-0.0032619	0.0735741	0.00833109	0.0247686	0.672852
BRUINS_UVC_RESPONSE_LATE	0.00219922	0.00684157	-0.0166008	0.0106249	0.016243	-0.00266515	0.0104184	0.672631
TIEN_INTESTINE_PROBIOTICS_2HR_UP	-0.0100359	0.00151582	-0.0091743	0.00771413	0.0190681	-0.000196374	0.0412215	0.67217
HIRSCH_CELLULAR_TRANSFORMATION_SIGNATURE_DN	-0.00449248	0.0147055	-0.0654102	0.00701059	-0.0294414	0.0276971	0.0896752	0.672077
HUTTMANN_B_CLL_POOR_SURVIVAL_UP	0.0115343	-0.0124626	-0.0244428	0.00821997	0.013728	-0.00166896	0.0212109	0.671831
CHEMNITZ_RESPONSE_TO_PROSTAGLANDIN_E2_UP	0.120281	0.0643198	0.0172673	0.0298033	0.0915502	-0.0452313	0.12223	0.670852
BIOCARTA_IL2RB_PATHWAY	-0.0825272	0.0274516	-0.0777028	-0.0305067	0.0469256	0.0410733	0.0629067	0.670544
MCCABE_BOUND_BY_HOXC6	-0.0190901	0.00831099	-0.0615163	-0.0252643	0.00153845	0.0113392	-0.0113407	0.669445
STONER_ESOPHAGEAL_CARCINOGENESIS_UP	-0.000732304	-0.00450112	-0.0172642	0.0166088	0.0545027	-0.0392867	0.109655	0.66916
RODRIGUES_NTN1_AND_DCC_TARGETS	-0.0194491	-0.0241414	-0.176286	0.0850065	0.0468995	-0.0216147	0.16957	0.669129
KEGG_GLYCOSPHINGOLIPID_BIOSYNTHESIS_LACTO_AND_NEOLACTO_SERIES	0.0702388	-0.184471	-0.255538	-1.02206	0.0465841	0.0293425	0.198927	0.668565
KOBAYASHI_EGFR_SIGNALING_24HR_DN	0.00481605	0.0471775	-0.013188	0.0167359	0.115223	0.0319628	0.0533594	0.668503
EHLERS_ANEUPLOIDY_UP	0.00377737	0.0289989	-0.115691	0.0899848	0.0256927	0.0187147	0.180853	0.668085
BRACHAT_RESPONSE_TO_CAMPTOTHECIN_DN	-0.0153557	0.00336127	-0.0522118	0.0457209	0.096905	-0.0376396	0.11998	0.668013
FIGUEROA_AML_METHYLATION_CLUSTER_7_UP	0.0210044	0.00195523	-0.0250476	0.020707	0.0345627	-0.0579318	0.111144	0.667581
TIEN_INTESTINE_PROBIOTICS_2HR_DN	-0.0339965	-0.00421355	-0.151077	0.00866172	-0.0850734	-0.0317824	0.230421	0.667205
REACTOME_COMPLEX_I_BIOGENESIS	-0.00526474	0.024061	-0.0725476	0.0155613	0.110181	-0.0126732	0.0289805	0.667097
BERNARD_PPAPDC1B_TARGETS_DN	-0.0422719	-0.0497589	-0.164358	0.0606834	0.0272727	-0.060222	0.198717	0.665857
REACTOME_TRANSPORT_TO_THE_GOLGI_AND_SUBSEQUENT_MODIFICATION	0.0448002	0.00755494	-0.0595843	0.0153191	0.0572352	-0.011611	0.0149689	0.665846
WAMUNYOKOLI_OVARIAN_CANCER_LMP_DN	0.000371829	0.0226012	-0.0692508	0.0403225	-0.0123675	-0.014577	0.115826	0.665543
RUIZ_TNC_TARGETS_DN	-0.000942643	0.0768599	-0.0452426	0.0036136	0.165023	0.07616	0.0613319	0.66542
WP_ZINC_HOMEOSTASIS	0.0597277	-0.122012	-0.221299	0.034612	0.198653	-0.211305	0.195893	0.664869
MIYAGAWA_TARGETS_OF_EWSR1_ETS_FUSIONS_DN	0.00582655	-0.0227974	-0.123102	0.0568881	-0.0116604	-0.00325625	0.259278	0.664793
BANDRES_RESPONSE_TO_CARMUSTIN_MGMT_24HR_DN	-0.0297876	0.0146644	-0.0221802	0.0182672	0.0740266	-0.00736464	0.0845843	0.664626
WP_TRANSCRIPTION_FACTOR_REGULATION_IN_ADIPOGENESIS	-0.283339	0.0161805	-0.271318	0.0970175	0.354066	0.0476581	0.550771	0.664071
REACTOME_RHOF_GTPASE_CYCLE	0.0215372	-0.0270993	-0.0140624	-0.00200191	0.0775697	-0.0468996	0.108826	0.663987
KOHOUTEK_CCNT2_TARGETS	0.0797943	-0.114313	-0.0254355	-0.0328689	0.305892	-0.0470928	0.351177	0.663873
ROZANOV_MMP14_TARGETS_SUBSET	-0.066055	0.0262767	-0.0942209	0.0693391	0.0670062	-0.0587416	0.352328	0.663667
COLLER_MYC_TARGETS_UP	-0.0198154	-0.0100254	-0.0179694	-0.0452634	0.198352	-0.0466458	0.137069	0.663256
VANOEVELEN_MYOGENESIS_SIN3A_TARGETS	-0.00748659	-0.0170392	-0.0162735	0.000293916	0.108426	-0.0240418	0.105313	0.663005
WARTERS_IR_RESPONSE_5GY	-0.00158269	-0.00740497	-0.0158924	-0.0343139	-0.0123473	0.0115146	0.0203732	0.662186
WP_ESTROGEN_SIGNALING_PATHWAY	-0.0590187	0.00127619	-0.0695981	0.0134374	0.0988755	-0.00122812	0.0817885	0.662177
REACTOME_COLLAGEN_FORMATION	0.0999563	-0.0169738	-0.158919	0.0807553	-0.000306194	0.0203435	0.186019	0.66195
REACTOME_TRANSLATION	0.00910731	-0.000884703	-0.0131157	-0.0136951	0.0364865	0.00577444	0.00622197	0.661631
ZHENG_IL22_SIGNALING_UP	0.342369	-0.149338	-0.271392	0.0980658	0.129968	-0.0622664	0.389964	0.661543
DANG_MYC_TARGETS_UP	-0.00880344	0.0125991	-0.00964185	0.0119255	0.071374	0.00640974	0.051564	0.660871
REACTOME_KERATAN_SULFATE_BIOSYNTHESIS	-0.0327548	-0.229618	-0.125049	-0.555382	-0.0194496	-0.0976381	0.206648	0.660628
PID_VEGFR1_PATHWAY	-0.105257	0.0365958	-0.0749059	0.0309171	0.0748236	-0.0557713	0.431991	0.660522
TCGA_GLIOBLASTOMA_COPY_NUMBER_UP	-0.0310259	-0.0381355	-0.00439318	-0.0471134	0.08744	0.0238818	0.24443	0.660272
BASSO_B_LYMPHOCYTE_NETWORK	-0.016049	-0.00469926	-0.0214893	-0.00489909	0.0622055	0.0139213	0.0393736	0.660051
REACTOME_GPVI_MEDIATED_ACTIVATION_CASCADE	-0.0378745	8.79638e-05	-0.0281646	-0.00189275	0.0879794	-0.00482595	0.0734967	0.659701
COLIN_PILOCYTIC_ASTROCYTOMA_VS_GLIOBLASTOMA_UP	0.00886669	0.0468675	-0.0775141	0.0700441	0.0621927	-0.0823038	0.133826	0.659471
HU_GENOTOXIN_ACTION_DIRECT_VS_INDIRECT_24HR	0.00727944	0.034923	-0.0487277	0.037792	0.024015	-0.00794441	0.0403169	0.65911
WP_NEURAL_CREST_CELL_MIGRATION_IN_CANCER	-0.0610664	0.017311	-0.0569736	0.0208626	0.049314	-0.0127862	0.0975896	0.658947
IWANAGA_CARCINOGENESIS_BY_KRAS_PTEN_UP	-0.0110894	0.0215404	-0.0834828	0.0873775	0.0629864	-0.0159076	0.178533	0.658524
PID_IL2_PI3K_PATHWAY	-0.0106795	0.0213632	-0.0955287	0.0503984	0.0480596	0.0125667	0.0585765	0.658325
KUMAR_TARGETS_OF_MLL_AF9_FUSION	-0.00561049	0.00177394	-0.0610008	0.0410691	0.0160641	0.00974704	0.0882104	0.658039
REACTOME_BBSOME_MEDIATED_CARGO_TARGETING_TO_CILIUM	-0.0254337	0.00853479	-0.0148602	-0.013344	0.0684782	0.00416694	0.0418507	0.658004
PEDERSEN_TARGETS_OF_611CTF_ISOFORM_OF_ERBB2	-0.0476591	-0.00760859	-0.117376	0.0986762	0.116058	-0.0343976	0.273962	0.657616
FUJII_YBX1_TARGETS_DN	0.0491635	0.0760353	0.00705178	0.000540222	0.174921	-0.0370435	0.0833972	0.657245
LIANG_HEMATOPOIESIS_STEM_CELL_NUMBER_SMALL_VS_HUGE_UP	0.0732887	-0.0286516	-0.025449	-0.00788453	0.0232934	-0.0130804	0.0763086	0.656928
MULLIGHAN_MLL_SIGNATURE_1_DN	-0.0236759	0.00251565	-0.0288282	-0.00375682	0.00518411	0.00557712	0.0136454	0.656518
HELLER_SILENCED_BY_METHYLATION_DN	-0.0426996	-0.00450504	-0.0709885	-0.00713785	-0.0158383	0.0316128	0.0836984	0.656442
WP_TYPE_I_INTERFERON_INDUCTION_AND_SIGNALING_DURING_SARSCOV2_INFECTION	-0.0941606	-0.00493652	-0.109116	0.00864633	0.0415815	0.013012	0.100935	0.656182
WP_NEURAL_CREST_CELL_MIGRATION_DURING_DEVELOPMENT	-0.0606018	0.0140342	-0.0566251	0.0208626	0.0497787	-0.0149968	0.0975896	0.656174
NELSON_RESPONSE_TO_ANDROGEN_UP	-0.0193596	-0.0097325	-0.0502801	-0.00500963	0.0040326	0.0287457	0.0326052	0.656105
GARY_CD5_TARGETS_DN	-0.0141495	0.0185095	0.0150497	-0.0150006	0.0773403	-0.000418139	0.0836789	0.655466
WILCOX_RESPONSE_TO_PROGESTERONE_UP	0.0643015	0.0319514	-0.0572459	0.0765834	0.186564	-0.15228	0.235323	0.653453
BRACHAT_RESPONSE_TO_METHOTREXATE_DN	0.0370893	-0.0108573	-0.071421	0.0671642	0.148111	-0.048801	0.129434	0.652554
GAUSSMANN_MLL_AF4_FUSION_TARGETS_G_UP	0.0378723	-0.0379765	0.0024066	-0.0828431	0.01296	-0.0617109	0.201008	0.651965
GALLUZZI_PERMEABILIZE_MITOCHONDRIA	-0.113997	0.0298852	-0.11315	0.0795151	0.146363	-0.0276442	0.279615	0.650936
ROVERSI_GLIOMA_COPY_NUMBER_DN	0.0376313	-0.00560165	0.0117173	-0.0743911	0.165873	-0.168034	0.237643	0.6505
ZHOU_TNF_SIGNALING_4HR	-0.0101662	-0.0102701	-0.0307839	0.00758291	0.0132101	0.0173507	0.0373606	0.650059
SHETH_LIVER_CANCER_VS_TXNIP_LOSS_PAM4	0.00827696	-0.0236529	-0.00846193	-0.0640526	0.16231	-0.0858776	0.122594	0.649653
FLECHNER_BIOPSY_KIDNEY_TRANSPLANT_REJECTED_VS_OK_DN	0.0177031	-0.00567617	-0.0210179	0.00967856	0.0366104	-0.0184143	0.0232524	0.649608
KAAB_HEART_ATRIUM_VS_VENTRICLE_DN	0.0250595	-0.00935453	-0.019448	-0.0298017	0.0915938	-0.0187615	0.0284614	0.649518
KLEIN_PRIMARY_EFFUSION_LYMPHOMA_UP	-0.00976389	-0.0204949	0.00318385	-0.0248087	0.0672653	-0.0467195	0.156655	0.648335
XIE_LT_HSC_S1PR3_OE_UP	-0.208128	-0.0253608	-0.313595	-0.198459	0.251074	0.243645	0.13369	0.648293
REACTOME_NEUTROPHIL_DEGRANULATION	0.0210754	-0.00976518	-0.00749245	-0.0158778	0.0171585	-0.00952449	0.0119435	0.648254
JEPSEN_SMRT_TARGETS	-0.0650767	-0.0169856	-0.212758	0.117509	0.116461	0.0219727	0.222595	0.647886
LIM_MAMMARY_STEM_CELL_UP	0.00625103	-0.00495988	-0.0725849	0.0335907	-0.0223231	-0.00391103	0.156835	0.647803
ONO_FOXP3_TARGETS_DN	-0.0164813	-0.0857132	-0.0823473	-0.00915308	0.161249	-0.0233587	0.130878	0.647625
FONTAINE_THYROID_TUMOR_UNCERTAIN_MALIGNANCY_DN	0.10321	-0.0908309	-0.063791	0.0736541	0.122447	0.00352687	0.4101	0.647295
NABA_SECRETED_FACTORS	0.0344109	0.00234447	-0.127552	0.0446017	0.00383501	0.0271124	0.0644627	0.64688
CREIGHTON_ENDOCRINE_THERAPY_RESISTANCE_4	0.0598884	-0.00485834	-0.0467484	0.0162749	0.0830826	-0.0469265	0.0456979	0.646444
WP_PHOTODYNAMIC_THERAPYINDUCED_UNFOLDED_PROTEIN_RESPONSE	0.00292809	0.00664496	-0.0847587	0.0238152	-0.0210532	0.0344839	0.0819419	0.646176
REACTOME_EGR2_AND_SOX10_MEDIATED_INITIATION_OF_SCHWANN_CELL_MYELINATION	0.103431	-0.00135581	-0.137932	0.00559268	-0.0765157	0.0534298	0.172739	0.645621
SCIAN_CELL_CYCLE_TARGETS_OF_TP53_AND_TP73_DN	0.113377	0.136264	-0.0956881	-0.363564	0.169472	0.200934	0.0734503	0.645258
VALK_AML_CLUSTER_7	0.0149755	-0.0139061	-0.0316958	0.0525934	0.161507	-0.12949	0.340516	0.644984
REACTOME_GLUTATHIONE_CONJUGATION	-0.0480485	-0.0333777	-0.148367	-0.0221927	0.152905	0.0324519	0.0326355	0.644745
IKEDA_MIR1_TARGETS_UP	0.0287394	0.010834	-0.123983	0.0922903	0.0078939	0.0231126	0.183928	0.644135
WP_GASTRIC_CANCER_NETWORK_2	-0.0176819	0.01235	-0.0798765	0.0597259	0.0122953	0.00347831	0.151325	0.643992
NABA_MATRISOME_ASSOCIATED	0.0447623	0.00527501	-0.124747	0.076761	0.00418653	0.0124378	0.128131	0.643986
SPIELMAN_LYMPHOBLAST_EUROPEAN_VS_ASIAN_DN	-0.0220459	0.00130731	-0.0090649	-0.00211059	0.023992	-0.00205706	0.0395513	0.643507
REACTOME_DISEASES_OF_METABOLISM	0.017494	-0.0317367	-0.045613	0.0288994	0.104049	-0.0745072	0.134136	0.642967
LIEN_BREAST_CARCINOMA_METAPLASTIC	0.0114295	0.106664	-0.206318	-0.0242858	-0.120331	0.0329894	0.0983416	0.64267
BLANCO_MELO_BETA_INTERFERON_TREATED_BRONCHIAL_EPITHELIAL_CELLS_DN	0.184894	-0.0308209	-0.27296	-0.0170999	-0.0225858	0.0691489	0.0761053	0.642132
MIKKELSEN_NPC_ICP_WITH_H3K4ME3	-0.069105	0.00235301	-0.0506167	0.00746619	0.0742686	-0.0206206	0.0949197	0.641754
SCHLINGEMANN_SKIN_CARCINOGENESIS_TPA_UP	0.0319773	0.00687195	0.00978799	0.0480806	0.0894128	-0.0175711	0.18707	0.641399
CONRAD_STEM_CELL	-0.0500754	-0.0302177	-0.118058	-0.0117715	-0.0132709	0.059219	0.0926425	0.641182
TARTE_PLASMA_CELL_VS_B_LYMPHOCYTE_UP	0.0100384	0.0114533	-0.0989424	0.0601483	0.0199636	0.0322352	0.0895929	0.640583
BROWNE_HCMV_INFECTION_24HR_DN	0.019698	0.0131971	-0.103963	0.0354057	0.00881343	0.020547	0.038171	0.640498
ROVERSI_GLIOMA_COPY_NUMBER_UP	-0.0462206	0.0409007	-0.0642411	0.0343078	0.0127844	-0.0043908	0.0948227	0.639815
WHITFIELD_CELL_CYCLE_LITERATURE	0.00105388	0.118124	-0.0292223	-0.218522	0.591977	-0.15099	0.219098	0.63909
DARWICHE_PAPILLOMA_PROGRESSION_RISK	0.0790407	0.0174716	-0.0142592	-0.00586289	-0.033004	-0.0074193	0.275158	0.637825
WESTON_VEGFA_TARGETS_12HR	0.0824349	-0.046731	-0.145027	0.128354	0.0678439	-0.123217	0.395594	0.637816
MOOTHA_PGC	-0.00396319	-0.0171245	-0.0268211	0.00189856	0.0864682	-0.0113849	0.050386	0.636438
CHEOK_RESPONSE_TO_HD_MTX_DN	-0.0737037	0.0372281	-0.164076	0.0682369	0.00600741	0.0131596	0.152146	0.636406
WP_HOSTPATHOGEN_INTERACTION_OF_HUMAN_CORONA_VIRUSES_INTERFERON_INDUCTION	-0.0987859	-0.00870304	-0.0993518	0.0034443	0.0356142	0.00732418	0.0957325	0.636045
GRUETZMANN_PANCREATIC_CANCER_DN	-0.00565682	-0.00690289	-0.00989854	0.00875813	0.0167205	-0.00668693	0.0487851	0.635167
KIM_MYCN_AMPLIFICATION_TARGETS_UP	-0.0972296	-0.0507575	-0.0950173	0.0129866	0.206192	-0.0161357	0.201761	0.635053
VART_KSHV_INFECTION_ANGIOGENIC_MARKERS_UP	0.0418374	0.025726	-0.181351	0.156813	0.0197291	0.0232635	0.297063	0.633807
IZADPANAH_STEM_CELL_ADIPOSE_VS_BONE_DN	0.0287479	-0.0267579	-0.11234	0.0314464	-0.0611563	-0.0179881	0.252966	0.633627
ZWANG_EGF_PERSISTENTLY_DN	-0.0320156	-0.113289	-0.0661462	-0.030783	0.348762	-0.0610456	0.303012	0.632855
WP_IL1_AND_MEGAKARYOCYTES_IN_OBESITY	0.0638132	-0.0128138	-0.197112	0.158365	0.0565708	0.0248964	0.260891	0.632375
WP_CYTOPLASMIC_RIBOSOMAL_PROTEINS	-0.00322324	0.000884637	-0.00164983	-0.00112504	0.00494045	3.85032e-05	0.0032599	0.63195
VERHAAK_GLIOBLASTOMA_MESENCHYMAL	0.0490765	0.00679794	-0.141104	0.0910827	0.0201338	0.0230271	0.125671	0.631146
SHAFFER_IRF4_TARGETS_IN_ACTIVATED_B_LYMPHOCYTE	0.0203082	-0.00411681	-0.0361658	0.0157496	0.108629	-0.0525835	0.0608536	0.631134
WP_HIPPOYAP_SIGNALING_PATHWAY	-0.0725975	0.0224442	-0.0732125	0.0239685	0.0111724	-0.102226	0.24901	0.630912
MAGRANGEAS_MULTIPLE_MYELOMA_IGG_VS_IGA_DN	-0.00130906	-0.00384955	-0.0861432	-0.00337066	0.0419241	0.0321022	0.00181677	0.63012
BLALOCK_ALZHEIMERS_DISEASE_DN	-0.00766941	0.00705797	-0.0168722	0.00906283	0.0482043	-0.0016777	0.0234849	0.630027
KEGG_APOPTOSIS	-0.0750122	-0.00609687	-0.079015	0.0097856	0.120136	-0.00301983	0.08438	0.629966
SENGUPTA_NASOPHARYNGEAL_CARCINOMA_UP	0.00476777	0.0444523	-0.0479013	0.013225	-0.0378118	-0.00487627	0.0835752	0.629623
WP_SIGNAL_TRANSDUCTION_THROUGH_IL1R	-0.0994941	-0.020453	-0.172824	0.0286644	0.110651	0.0150479	0.0796562	0.629002
REACTOME_CONSTITUTIVE_SIGNALING_BY_AKT1_E17K_IN_CANCER	-0.316064	0.057345	-0.265666	-0.193031	0.153867	0.199416	0.192966	0.628649
WP_SARSCOV2_MITOCHONDRIAL_INTERACTIONS	-0.0503628	0.00472808	-0.0286651	-0.0489327	0.179894	-0.0931171	0.111095	0.628442
KIM_MYC_AMPLIFICATION_TARGETS_UP	-0.00403046	-0.0184447	-0.0026063	-0.0282734	0.144891	-0.0258035	0.102726	0.628311
WP_IL1_SIGNALING_PATHWAY	-0.104033	-0.00376817	-0.0892148	-0.00861185	0.0562399	0.0393913	0.109461	0.628148
WANG_TUMOR_INVASIVENESS_UP	0.00376929	0.0135576	-0.00615139	0.0153439	0.0354937	-0.00748893	0.0240791	0.62762
BREDEMEYER_RAG_SIGNALING_NOT_VIA_ATM_DN	0.106101	-0.0779053	0.00940794	-0.0854991	0.149765	-0.124551	0.235363	0.627222
WP_OXIDATIVE_PHOSPHORYLATION	-0.00757994	0.0174882	-0.0619369	0.00791261	0.0596351	-0.00434687	0.00192041	0.627122
FRASOR_TAMOXIFEN_RESPONSE_UP	0.0262194	-0.027357	-0.0760099	0.0549473	0.0659289	-0.0055626	0.0836602	0.626834
NEMETH_INFLAMMATORY_RESPONSE_LPS_DN	-0.132361	0.00132449	-0.0771565	-0.0130392	0.0705619	0.0239883	0.18191	0.626778
BIOCARTA_IL1R_PATHWAY	-0.096098	-0.0216952	-0.170876	0.0322876	0.108892	0.0190909	0.0832794	0.626016
SHAFFER_IRF4_TARGETS_IN_MYELOMA_VS_MATURE_B_LYMPHOCYTE	-0.0284941	0.000373408	-0.068473	0.0328425	0.0448975	0.0155443	0.0546398	0.625875
CAIRO_HEPATOBLASTOMA_CLASSES_UP	0.0208492	0.013624	0.0172415	-0.00216925	0.0751494	-0.0152432	0.0585096	0.625655
SHEPARD_BMYB_TARGETS	-0.0118549	0.0269339	-0.0431695	-0.016254	-0.0488073	-0.00122585	0.0681296	0.625241
YU_BAP1_TARGETS	0.087849	0.0548882	-0.00288573	0.0124779	0.130451	-0.136762	0.149274	0.624691
SILIGAN_BOUND_BY_EWS_FLT1_FUSION	-0.00531494	0.0318342	-0.139768	0.0306867	-0.0496711	0.0224141	0.0808762	0.624226
WP_SELENIUM_MICRONUTRIENT_NETWORK	-0.0303721	0.0191315	-0.0570132	0.034011	0.00713658	0.0222674	0.0936633	0.624117
WP_MICRORNAS_IN_CARDIOMYOCYTE_HYPERTROPHY	-0.0324684	0.0122406	-0.0880379	0.0690748	0.0121399	0.00946657	0.196132	0.623494
AMIT_EGF_RESPONSE_60_HELA	-0.135045	0.0198935	-0.161893	0.0699498	0.0487083	0.0120011	0.237872	0.622985
TERAMOTO_OPN_TARGETS_CLUSTER_6	-0.00789254	-0.000704881	0.0101783	-0.00289324	0.0361371	0.00757443	0.0837765	0.620911
REACTOME_SENSORY_PERCEPTION	0.0203164	0.00764464	-0.0304611	0.0109011	-0.0113763	-0.00677166	0.0240885	0.620725
REACTOME_MITOCHONDRIAL_BIOGENESIS	-0.0150757	0.00521393	-0.00604506	-0.00609768	0.0500643	-0.000824361	0.0293965	0.620573
MARTINEZ_TP53_TARGETS_DN	-0.0122599	0.000185805	-0.0270505	0.0181518	0.0195309	0.000162704	0.0311596	0.619508
WANG_CISPLATIN_RESPONSE_AND_XPC_DN	-0.0432521	-0.0100349	-0.0259578	0.00891588	0.0729907	-0.0226317	0.0962086	0.619092
WP_THYMIC_STROMAL_LYMPHOPOIETIN_TSLP_SIGNALING_PATHWAY	-0.015406	-0.0339903	-0.0533437	0.0382097	0.0430732	-0.00476079	0.132782	0.619059
ELVIDGE_HIF1A_TARGETS_DN	-0.0739481	-0.0160696	-0.244206	0.222291	0.212215	-0.0264751	0.407131	0.618867
GENTILE_UV_RESPONSE_CLUSTER_D5	-0.0581127	-0.032232	-0.0187962	-0.0402503	0.194383	-0.0056901	0.159596	0.61868
WP_CANNABINOID_RECEPTOR_SIGNALING	-0.0764857	0.0911304	-0.0830679	0.000660383	0.00862876	0.00389515	0.0662302	0.618616
WANG_LSD1_TARGETS_DN	-0.00564681	-0.0117083	-0.00896903	-0.0183806	-0.00472355	-0.0397279	0.132989	0.618461
BILD_E2F3_ONCOGENIC_SIGNATURE	-0.0292746	0.00429836	-0.013472	-0.0662995	0.164974	-0.0528271	0.0744173	0.617875
WILLIAMS_ESR1_TARGETS_UP	-0.00495053	-0.02498	-0.00478902	-0.102782	0.0946838	-0.024362	0.0465024	0.617272
LEE_EARLY_T_LYMPHOCYTE_UP	0.144438	0.0602166	-0.0463381	-0.139296	0.447563	-0.0591865	0.0913771	0.61712
LEE_METASTASIS_AND_ALTERNATIVE_SPLICING_UP	0.0381771	0.00828132	-0.0990104	0.0760941	-0.00324826	-0.0699495	0.165782	0.617025
LOPEZ_TRANSLATION_VIA_FN1_SIGNALING	-0.0198904	0.0198311	-0.0396941	0.00553364	-0.0348844	-0.013828	0.125141	0.616309
CAMPS_COLON_CANCER_COPY_NUMBER_UP	-0.0261637	-0.0100727	-0.0156437	-0.029862	0.0847899	-0.000734041	0.0427759	0.616297
WP_SLEEP_REGULATION	-0.0548346	0.00449726	-0.0588715	0.00684187	0.0748683	0.045056	0.0682084	0.61553
ZHANG_ANTIVIRAL_RESPONSE_TO_RIBAVIRIN_DN	-0.0555016	-0.0261832	-0.0082051	-0.0282293	0.0754714	-0.0387905	0.156282	0.615309
YOSHIMURA_MAPK8_TARGETS_DN	0.01454	0.00228196	-0.0272328	0.0301169	0.00891386	-0.00702208	0.0506589	0.615191
REACTOME_ACTIVATION_OF_MATRIX_METALLOPROTEINASES	0.145613	-0.0483942	-0.239722	0.117687	0.0108408	0.0907529	0.232669	0.614644
THEODOROU_MAMMARY_TUMORIGENESIS	0.115722	0.0181328	-0.206445	0.184696	0.0734336	0.104584	0.251651	0.613956
BILBAN_B_CLL_LPL_UP	0.0262594	0.0104687	-0.145713	0.0507684	0.00928631	0.0238773	0.0466124	0.61363
KEGG_CYTOKINE_CYTOKINE_RECEPTOR_INTERACTION	0.143163	-0.0772054	-0.110352	0.108917	0.0619231	-0.0238311	0.318245	0.613474
REACTOME_CRISTAE_FORMATION	-0.0112367	0.0099417	-0.0123244	-0.0245395	0.055202	0.00999784	0.0123244	0.61334
ABE_INNER_EAR	0.0320911	-0.0116194	-0.0567827	0.00706772	0.0544608	0.0136673	0.00907368	0.61306
REACTOME_ASSOCIATION_OF_TRIC_CCT_WITH_TARGET_PROTEINS_DURING_BIOSYNTHESIS	-0.0214596	-0.00167525	0.0109433	-0.0374881	0.123024	-0.0278349	0.0992828	0.613
PAPASPYRIDONOS_UNSTABLE_ATEROSCLEROTIC_PLAQUE_UP	-0.0820593	-0.00660296	-0.0837045	0.059652	0.0440259	0.019568	0.325839	0.61276
BENPORATH_NANOG_TARGETS	0.0137803	-0.0109556	-0.00446361	0.000370333	0.0114229	-0.0105086	0.0266795	0.611697
GROSS_HYPOXIA_VIA_HIF1A_UP	0.000364443	0.026108	-0.000243492	0.0446846	0.116282	-0.0194227	0.111229	0.611113
XU_GH1_EXOGENOUS_TARGETS_UP	-0.257362	0.0851595	-0.233636	0.132747	0.26218	-0.0044251	0.36587	0.611028
ACEVEDO_LIVER_CANCER_WITH_H3K27ME3_UP	-0.0068618	-0.0150088	-0.0542106	0.0343771	0.0333416	-0.00488246	0.0529155	0.609919
WP_SUDDEN_INFANT_DEATH_SYNDROME_SIDS_SUSCEPTIBILITY_PATHWAYS	-0.0518533	-0.00759023	-0.0490479	0.0309641	0.0659462	-0.00614052	0.105039	0.608364
KEGG_VEGF_SIGNALING_PATHWAY	-0.044731	0.0445087	-0.0529391	0.00897044	-0.0269561	0.0366915	0.142	0.60807
INGRAM_SHH_TARGETS_DN	0.0406259	0.00782502	-0.201622	0.049735	-0.0356605	0.102077	0.124723	0.607859
WP_HAIR_FOLLICLE_DEVELOPMENT_CYTODIFFERENTIATION_PART_3_OF_3	-0.0295482	-0.0252384	-0.141073	0.0176449	0.0143223	0.0960708	0.100033	0.606976
KIM_ALL_DISORDERS_OLIGODENDROCYTE_NUMBER_CORR_DN	0.046314	0.0549651	-0.0322856	-0.00208385	-0.0658742	-0.072132	0.2434	0.606397
CHIARADONNA_NEOPLASTIC_TRANSFORMATION_KRAS_CDC25_UP	0.0681795	-0.0178105	-0.0831787	0.0394226	0.0875507	0.0103968	0.0402621	0.605931
HARRIS_HYPOXIA	-0.0355981	-0.00444139	-0.12874	0.111774	0.0697547	-0.00805047	0.19601	0.605599
BRUINS_UVC_RESPONSE_VIA_TP53_GROUP_C	-0.0869239	0.0272269	0.0268153	-0.0864113	0.0720549	-0.0530271	0.231171	0.605469
SCHAEFFER_PROSTATE_DEVELOPMENT_12HR_UP	-0.0487006	-0.0331184	-0.0700233	0.039187	0.0499144	-0.0103484	0.136533	0.605097
PID_HIF1_TFPATHWAY	-0.022656	-0.00891847	-0.107351	0.129468	0.110101	-0.0165587	0.248961	0.605084
WP_ARYL_HYDROCARBON_RECEPTOR_NETPATH	0.00334666	-0.00395043	-0.141935	0.0130293	-0.0980795	0.0344186	0.171835	0.604743
WP_PHOTODYNAMIC_THERAPYINDUCED_HIF1_SURVIVAL_SIGNALING	-0.0590429	0.00727283	-0.161835	0.200215	0.219597	-0.0698632	0.376906	0.604431
WP_GLYCOSYLATION_AND_RELATED_CONGENITAL_DEFECTS	0.098841	-0.0270053	-0.242262	0.0376934	0.141027	-0.0699161	-0.00212141	0.603982
LIANG_HEMATOPOIESIS_STEM_CELL_NUMBER_SMALL_VS_HUGE_DN	-0.0207542	0.0442147	-0.236298	0.00865012	0.0748139	0.0637805	-0.0141756	0.603352
THEILGAARD_NEUTROPHIL_AT_SKIN_WOUND_UP	-0.0442835	-0.0012513	-0.07247	0.0556385	0.0681986	-0.00215996	0.106033	0.603117
POMEROY_MEDULLOBLASTOMA_PROGNOSIS_DN	0.00217294	0.0104088	-0.018763	0.00603156	0.0375492	0.00117402	0.0056191	0.602595
REACTOME_HATS_ACETYLATE_HISTONES	-0.0556742	0.0148249	-0.00795716	-0.0169335	0.0608187	0.00347685	0.079077	0.602322
LANDIS_ERBB2_BREAST_TUMORS_324_DN	-0.0324812	0.0145863	-0.0536627	0.0394078	0.0144313	0.0159582	0.0918571	0.600983
VECCHI_GASTRIC_CANCER_EARLY_DN	0.0222465	-0.0878341	-0.204568	0.0761777	-0.0109266	0.00126462	0.17532	0.600839
RUTELLA_RESPONSE_TO_HGF_UP	-0.0153507	0.00102704	-0.0814994	0.0429351	0.0111212	0.00967761	0.0594387	0.600726
MILI_PSEUDOPODIA_HAPTOTAXIS_UP	0.00767597	0.00100987	-0.00251604	0.00978208	0.00577223	-0.0214151	0.0950529	0.600377
KYNG_DNA_DAMAGE_BY_4NQO	0.0769362	-0.027046	-0.0545364	0.0198552	0.0464663	-0.0243093	0.0474795	0.600287
BILANGES_RAPAMYCIN_SENSITIVE_VIA_TSC1_AND_TSC2	-0.0134217	-0.00965694	0.00246639	-0.0185806	0.0498876	-0.00295939	0.0453081	0.600266
NGUYEN_NOTCH1_TARGETS_DN	-0.0654041	0.0393416	-0.121345	0.0544426	-0.0166503	-0.0019381	0.1281	0.599719
LEE_LIVER_CANCER_E2F1_DN	-0.0641105	0.0231847	-0.12021	0.0714897	0.187151	-0.0602835	0.112877	0.599658
YAMAZAKI_TCEB3_TARGETS_UP	0.00585181	0.033852	-0.128393	0.0723258	-0.0300515	0.0151577	0.123954	0.599306
WP_TLR4_SIGNALING_AND_TOLERANCE	-0.136325	-0.0149625	-0.229547	0.0636643	0.0929751	0.0532444	0.136548	0.597937
REACTOME_PERK_REGULATES_GENE_EXPRESSION	-0.0417879	-0.0180753	-0.0316496	0.0136245	0.083128	0.0105022	0.0915169	0.59736
BIOCARTA_TOLL_PATHWAY	-0.107567	-0.0101709	-0.113606	0.0183785	0.0919534	0.00807501	0.0858445	0.597105
WP_FLUOROPYRIMIDINE_ACTIVITY	0.0465665	-0.0871101	-0.0768377	0.00424897	0.564307	-0.141746	0.319726	0.597024
REACTOME_FLT3_SIGNALING	-0.0108476	0.00913519	-0.00907316	-0.00776673	0.0185283	-0.00307352	0.00211569	0.595874
NUTT_GBM_VS_AO_GLIOMA_DN	-0.014303	-0.00180333	-0.0147165	-0.00183386	0.0317853	0.000773048	0.0132751	0.595702
WP_PATHWAYS_IN_CLEAR_CELL_RENAL_CELL_CARCINOMA	-0.0516741	-0.00472164	-0.0706312	0.0629321	0.164748	-0.0436606	0.147364	0.595608
LENAOUR_DENDRITIC_CELL_MATURATION_DN	-0.00933042	-0.0132451	-0.122436	0.0610149	0.0596396	0.0272791	0.0648582	0.594198
HOLLEMAN_VINCRISTINE_RESISTANCE_B_ALL_UP	-0.0397516	-0.0216742	0.0272182	-0.00984133	0.187331	-0.195836	0.48841	0.593108
DODD_NASOPHARYNGEAL_CARCINOMA_DN	0.0128211	0.0100739	0.0193686	0.00901212	0.0488506	-0.0104166	0.0638348	0.592796
BENPORATH_OCT4_TARGETS	0.0221375	-0.0181628	-0.000206356	0.0134337	0.0461738	-0.0133495	0.0715532	0.592732
FERRANDO_T_ALL_WITH_MLL_ENL_FUSION_DN	0.00564345	0.0170435	-0.0238769	0.0306681	0.0964777	0.00500879	0.0422764	0.592253
JOHNSTONE_PARVB_TARGETS_1_DN	-0.0317425	0.0111415	-0.0675304	0.0703458	0.0158846	-0.0136856	0.187845	0.592247
WP_AMPACTIVATED_PROTEIN_KINASE_AMPK_SIGNALING	0.0348066	-0.0453473	0.00301624	-0.116438	0.238426	-0.102476	0.124785	0.591762
IIZUKA_LIVER_CANCER_PROGRESSION_G2_G3_UP	0.0469684	-0.0460679	-0.115249	0.102134	0.198955	-0.0586333	0.152302	0.591365
JAZAERI_BREAST_CANCER_BRCA1_VS_BRCA2_UP	0.0016544	0.00637334	-0.0328652	0.040847	0.068291	-0.0283154	0.0580548	0.591255
RHEIN_ALL_GLUCOCORTICOID_THERAPY_UP	-0.0507313	-0.0445303	-0.0949389	0.0388378	0.0375844	-0.0229005	0.100478	0.591167
KUROZUMI_RESPONSE_TO_ONCOCYTIC_VIRUS	0.132622	-0.0317247	-0.16977	0.168087	0.0105343	-0.0859957	0.368979	0.591128
RORIE_TARGETS_OF_EWSR1_FLI1_FUSION_UP	0.0073673	0.0648329	-0.214074	-0.0256498	-0.0875158	0.08668	0.0463729	0.591028
NADLER_OBESITY_UP	0.0083446	0.01962	-0.0723656	0.0183352	-0.013138	0.0339909	0.032756	0.590945
MORI_SMALL_PRE_BII_LYMPHOCYTE_DN	-0.0504584	0.00631914	-0.0511773	-0.0212284	0.15176	-0.00118399	0.0454212	0.590646
DANG_BOUND_BY_MYC	-0.0141594	3.51335e-05	-0.00634943	0.00195478	0.0481078	-0.00342107	0.0334253	0.590277
WP_LEPTIN_SIGNALING_PATHWAY	-0.0495328	0.021853	-0.0482885	0.0471957	0.01811	0.00706069	0.158998	0.589464
GUO_HEX_TARGETS_DN	-0.00755462	0.0168461	-0.054082	-0.00148169	0.192593	-0.0150119	0.045551	0.589317
WP_IL17_SIGNALING_PATHWAY	-0.109058	0.064467	-0.237387	0.11672	0.0421628	0.0329335	0.165816	0.589123
NIKOLSKY_BREAST_CANCER_20Q12_Q13_AMPLICON	-0.00919988	0.00221972	-0.0411211	0.0410599	0.00581275	-0.0225946	0.102131	0.588969
BECKER_TAMOXIFEN_RESISTANCE_DN	-0.0103294	-0.0520247	-0.0381664	0.00793514	0.0356793	0.045611	0.144955	0.588299
REACTOME_METABOLISM_OF_FAT_SOLUBLE_VITAMINS	0.0949146	0.0727282	-0.309966	0.179887	0.0124275	-0.0129815	0.157139	0.58808
XU_GH1_AUTOCRINE_TARGETS_UP	-0.000340745	-0.00701719	-0.00936312	0.00937153	0.0698543	0.000188847	0.0423771	0.587553
SHETH_LIVER_CANCER_VS_TXNIP_LOSS_PAM6	-0.0576703	-0.0966536	0.0554235	-0.241709	0.224555	-0.118748	0.316219	0.587386
PID_TXA2PATHWAY	-0.0149801	0.0281677	-0.0286663	0.0154675	-0.0136997	0.0103757	0.0585277	0.587308
WEI_MYCN_TARGETS_WITH_E_BOX	0.0134749	-0.00335172	0.0139833	-0.00616115	0.104862	-0.00682439	0.0710111	0.586291
LI_WILMS_TUMOR_VS_FETAL_KIDNEY_1_DN	0.0511872	0.0675433	-0.0171452	0.12772	0.193302	0.000888538	0.150075	0.586126
NOUSHMEHR_GBM_SILENCED_BY_METHYLATION	0.0591133	-0.0289548	-0.124155	-0.0253742	0.0958655	0.0228824	-0.0196011	0.586047
HELLER_HDAC_TARGETS_DN	0.0129596	-0.0046772	-0.0273173	0.00116798	-0.0163758	0.00679599	0.0218031	0.585711
ASTIER_INTEGRIN_SIGNALING	-0.0971553	-0.00851742	-0.06352	0.010063	0.191732	-0.0153995	0.133424	0.585413
HOFFMANN_PRE_BI_TO_LARGE_PRE_BII_LYMPHOCYTE_DN	-0.00530756	-0.00320359	-0.0817271	0.0510653	-0.0126349	0.000472049	0.0999861	0.585304
WOO_LIVER_CANCER_RECURRENCE_UP	-0.0138748	0.00761859	-0.0900275	0.081749	0.0106482	0.0146569	0.155647	0.584881
REACTOME_KERATAN_SULFATE_KERATIN_METABOLISM	-0.0302579	-0.224811	-0.108554	-0.584539	-0.105984	-0.0780843	0.150756	0.584859
SERVITJA_ISLET_HNF1A_TARGETS_UP	0.0162121	0.0381515	-0.115145	0.0617408	0.00424741	0.0227267	0.0551852	0.584718
LIU_CMYB_TARGETS_UP	0.0249344	-0.024197	-0.0847134	0.0737604	0.044883	0.0074493	0.103356	0.584601
REACTOME_VISUAL_PHOTOTRANSDUCTION	0.0199761	0.0177749	-0.149761	0.0774405	0.0473027	0.00821629	0.0482056	0.584566
WANG_ADIPOGENIC_GENES_REPRESSED_BY_SIRT1	-0.0341297	-0.044489	-0.0547212	0.0771391	0.174142	-0.0899293	0.264513	0.583933
RUAN_RESPONSE_TO_TNF_DN	0.0537171	-0.0543358	-0.0214455	0.0249768	0.175671	-0.0354019	0.138155	0.583662
PID_AURORA_B_PATHWAY	0.0497618	0.0187271	0.00734463	0.032778	0.0245426	-0.00221019	0.061041	0.58291
RICKMAN_TUMOR_DIFFERENTIATED_WELL_VS_MODERATELY_UP	0.0202864	-0.0537088	-0.0748556	-0.190927	0.0792601	0.0723566	0.00679601	0.582882
REACTOME_PLATELET_CALCIUM_HOMEOSTASIS	0.00473328	-0.00401978	-0.116164	0.0543812	0.0703838	0.00711011	0.0335187	0.582838
PRAMOONJAGO_SOX4_TARGETS_UP	-0.0915521	0.00718949	-0.140034	0.0753856	0.00389388	-0.00287726	0.187529	0.582377
BIOCARTA_VEGF_PATHWAY	0.0180006	-0.01692	0.0382926	0.0128075	0.198738	-0.134573	0.324229	0.582353
ZHAN_V1_LATE_DIFFERENTIATION_GENES_UP	0.00469489	0.0582464	-0.187518	0.0711957	0.00624373	0.0506632	0.0582811	0.58208
BOHN_PRIMARY_IMMUNODEFICIENCY_SYNDROM_DN	0.000203581	0.0372822	-0.090484	-0.178908	-0.0978472	0.0217286	0.0110685	0.581689
ABE_VEGFA_TARGETS_2HR	-0.0642178	0.0222612	-0.223044	0.108066	0.0437326	0.130646	0.191717	0.581171
HU_ANGIOGENESIS_DN	-0.0393287	0.0313882	-0.0501285	0.0280354	0.0857397	-0.00782665	0.0422473	0.580938
ACEVEDO_LIVER_CANCER_UP	0.0116828	-0.00534383	-0.000120792	0.00910857	0.00769607	-0.0043739	0.050345	0.580478
MOREAUX_MULTIPLE_MYELOMA_BY_TACI_DN	0.0284738	0.00286493	0.0402882	-0.0241669	0.112145	-0.0432513	0.121275	0.5804
REACTOME_RHOB_GTPASE_CYCLE	0.0375516	0.0094477	0.00139146	-0.0656559	-0.0594537	-0.138783	0.342177	0.579662
WP_MATRIX_METALLOPROTEINASES	0.218543	-0.0508683	-0.180388	0.118314	0.0450369	0.0421017	0.199912	0.57878
PID_IL4_2PATHWAY	-0.185181	0.05116	-0.199095	0.130613	0.203551	0.0448283	0.256934	0.57773
REACTOME_CTLA4_INHIBITORY_SIGNALING	-0.0557247	0.0336235	-0.0156615	-0.0230825	0.153191	-0.0561539	0.0793936	0.577702
SCIBETTA_KDM5B_TARGETS_DN	-0.0353919	0.0131306	0.00257017	-0.00935202	0.148773	-0.0551687	0.111454	0.577671
DOANE_BREAST_CANCER_ESR1_DN	0.297114	-0.18452	-0.0774649	0.0961743	0.33557	-0.0831038	0.41048	0.577509
MADAN_DPPA4_TARGETS	-0.00992045	-0.0172832	-0.00155642	-0.0166344	0.188838	-0.0231558	0.110728	0.577479
JAERVINEN_AMPLIFIED_IN_LARYNGEAL_CANCER	0.0674365	0.00381731	-0.0257921	-0.0960942	0.094749	0.00511195	-0.0025082	0.577239
TIEN_INTESTINE_PROBIOTICS_24HR_DN	-0.021167	-0.000899933	-0.0429714	0.0144409	-0.00696082	0.0127043	0.0425157	0.5772
REACTOME_RAF_ACTIVATION	-0.015736	0.00784726	-0.0402595	0.0351371	0.078523	0.00455162	0.0454393	0.576852
PUJANA_CHEK2_PCC_NETWORK	0.0117646	0.035141	0.0206887	0.0108011	0.0679551	-0.00521752	0.0459811	0.57664
RATTENBACHER_BOUND_BY_CELF1	-0.0319822	0.0123249	-0.0614801	0.0190932	0.0156301	0.0235714	0.03117	0.575917
HWANG_PROSTATE_CANCER_MARKERS	-0.0472338	-0.0126069	-0.0778283	0.0508305	0.023858	0.00210294	0.114868	0.575048
KYNG_ENVIRONMENTAL_STRESS_RESPONSE_NOT_BY_GAMMA_IN_OLD	-0.0530653	-0.0191894	-0.0175657	0.0221632	0.133534	-0.0331761	0.158737	0.574889
MOOTHA_GLUCONEOGENESIS	0.0106683	-0.00805884	-0.0195266	-0.0022033	0.102445	-0.066421	0.053306	0.574603
PID_AP1_PATHWAY	-0.06598	-0.0145751	-0.12217	0.0468769	0.0240366	0.0274531	0.0932957	0.574197
JOHANSSON_BRAIN_CANCER_EARLY_VS_LATE_DN	0.0185067	0.0253941	-0.150183	0.0626771	-0.0290001	0.036144	0.0801256	0.573812
SHEPARD_CRASH_AND_BURN_MUTANT_UP	-0.0611062	-0.0118856	-0.0307143	0.000552195	0.0316456	0.0211117	0.106778	0.573546
GROSS_HYPOXIA_VIA_ELK3_ONLY_UP	0.0374619	-0.0822122	-0.164107	0.160393	0.0493265	-0.0873769	0.38316	0.573446
ELVIDGE_HYPOXIA_UP	-0.0545817	-0.0165868	-0.110179	0.0840859	0.0553662	0.0108273	0.155794	0.572742
PID_INSULIN_PATHWAY	-0.0311496	-0.0281835	-0.0339274	0.0242899	0.0608293	0.0428562	0.119574	0.57207
YAO_TEMPORAL_RESPONSE_TO_PROGESTERONE_CLUSTER_11	-0.00336271	-0.0222744	0.00349937	0.020641	0.126042	0.00208361	0.124366	0.571913
PECE_MAMMARY_STEM_CELL_DN	-0.00549515	0.0111185	-0.0346629	0.0355099	-0.0186911	-0.00708152	0.137568	0.570623
WP_VITAMIN_D_RECEPTOR_PATHWAY	-0.013105	-0.00368648	-0.130957	0.0816691	0.00894514	0.0253607	0.113874	0.570468
CHIARADONNA_NEOPLASTIC_TRANSFORMATION_CDC25_UP	0.0398176	-0.0301747	-0.10182	0.0895463	-0.00700831	0.0163516	0.203293	0.570336
SCHLOSSER_MYC_TARGETS_REPRESSED_BY_SERUM	-0.0237264	-0.000166731	0.014215	-0.000915899	0.0994968	-0.00942109	0.103406	0.570252
PID_S1P_S1P1_PATHWAY	-0.0113206	0.0447765	-0.0910401	0.0728149	-0.0286634	0.0377613	0.162537	0.57023
GENTILE_RESPONSE_CLUSTER_D3	-0.222704	0.0239616	-0.150655	0.0280585	0.0739548	0.0240709	0.236931	0.570128
LI_CISPLATIN_RESISTANCE_UP	-0.541864	-0.0926326	-0.221467	0.135752	0.481881	-0.322451	1.16887	0.569965
JINESH_BLEBBISHIELD_TRANSFORMED_STEM_CELL_SPHERES_DN	-0.0386014	-0.00734733	-0.0865688	0.0260355	0.0138729	0.0221177	0.0422768	0.569802
MALONEY_RESPONSE_TO_17AAG_UP	-0.0010745	0.0175449	-0.0629576	0.00510147	-0.0156369	0.0231052	0.0122241	0.569685
FALVELLA_SMOKERS_WITH_LUNG_CANCER	-0.0712573	0.0210873	-0.0200656	-0.0118355	-0.00513768	0.00472334	0.15929	0.569033
REACTOME_NEPHRIN_FAMILY_INTERACTIONS	-0.0977511	0.0480069	-0.0582048	0.0857564	0.0701324	-0.0533214	0.278952	0.568636
LIU_LIVER_CANCER	-0.282843	-0.149317	-0.286466	0.146498	0.875449	-0.333174	0.650412	0.568469
GINESTIER_BREAST_CANCER_20Q13_AMPLIFICATION_UP	-0.0299681	0.0201034	-0.0515154	0.0330828	-0.0112468	0.00297604	0.0824276	0.568123
PIONTEK_PKD1_TARGETS_UP	-0.0607932	-0.149152	-0.150503	0.0460606	0.160231	0.0825616	0.249344	0.567739
SUBTIL_PROGESTIN_TARGETS	-0.0333696	0.00449099	-0.0846407	0.0535657	0.036619	0.0111594	0.0652543	0.567449
HAHTOLA_MYCOSIS_FUNGOIDES_SKIN_UP	-0.0110288	0.00523705	-0.00846141	0.0221132	0.0217351	-0.00702317	0.0558491	0.566907
ELVIDGE_HIF1A_AND_HIF2A_TARGETS_DN	-0.0250765	-0.0322309	-0.193888	0.211522	0.163278	-0.0446602	0.309148	0.566893
WP_DEVELOPMENT_AND_HETEROGENEITY_OF_THE_ILC_FAMILY	0.098886	-0.34679	-0.0895626	-0.0724837	0.398215	-0.052376	0.457008	0.565836
REACTOME_REGULATION_OF_BETA_CELL_DEVELOPMENT	-0.0530403	-0.00306918	-0.0505036	0.00366352	0.000387623	-0.00987133	0.0327602	0.565249
RASHI_RESPONSE_TO_IONIZING_RADIATION_5	0.0277453	-0.0394267	0.0131991	-0.0334535	0.0609384	-0.029212	0.0861416	0.565053
PID_PTP1B_PATHWAY	-0.0375141	0.0116243	-0.0769985	0.0798268	0.109779	0.00777139	0.103268	0.563184
YAO_TEMPORAL_RESPONSE_TO_PROGESTERONE_CLUSTER_15	0.0616823	0.117373	0.0907121	-0.0327149	0.318602	-0.00216509	0.159009	0.562649
FONTAINE_PAPILLARY_THYROID_CARCINOMA_DN	0.0636914	-0.178892	0.0548729	-0.526548	0.219869	-0.112982	0.268827	0.562095
REACTOME_RAB_GEFS_EXCHANGE_GTP_FOR_GDP_ON_RABS	-0.011215	0.00178051	0.0170811	-0.0407494	0.0348628	-0.00252036	0.0460814	0.561564
ACEVEDO_LIVER_TUMOR_VS_NORMAL_ADJACENT_TISSUE_UP	0.016508	0.00120325	-0.0170745	0.0151639	0.049885	0.00700442	0.0153019	0.561185
COATES_MACROPHAGE_M1_VS_M2_UP	-0.0390192	0.0428285	0.0402718	-0.0565138	0.0120882	-0.0652822	0.235461	0.56066
PANGAS_TUMOR_SUPPRESSION_BY_SMAD1_AND_SMAD5_DN	0.0169665	-0.00834311	0.0171608	-0.0465949	0.0474834	-0.0707069	0.0751279	0.560628
BIOCARTA_VIP_PATHWAY	-0.10644	0.00881894	-0.171488	0.0900646	0.0772472	0.0165584	0.128074	0.560532
MAHAJAN_RESPONSE_TO_IL1A_DN	-0.0130164	0.0166011	-0.0362619	0.0344879	0.00818165	0.0135878	0.0522424	0.560369
PETROVA_ENDOTHELIUM_LYMPHATIC_VS_BLOOD_UP	0.108173	0.0674193	-0.135864	0.0744183	-0.00799611	-0.0589991	0.0667226	0.56
PID_AVB3_OPN_PATHWAY	-0.0325427	-0.00734253	-0.0676905	0.0434706	0.0126908	0.00376547	0.0775903	0.559471
SHAFFER_IRF4_TARGETS_IN_PLASMA_CELL_VS_MATURE_B_LYMPHOCYTE	-0.035725	3.963e-05	-0.0747234	0.0636418	0.0434766	0.045366	0.115123	0.558961
WANG_NEOPLASTIC_TRANSFORMATION_BY_CCND1_MYC	-0.0261673	-0.0243344	-0.0595643	0.0245149	0.17583	0.106037	0.116719	0.558258
BROWNE_HCMV_INFECTION_10HR_UP	-0.0337539	0.00703218	-0.0680894	0.038908	0.022885	0.0111382	0.0496261	0.55675
WP_STRUCTURAL_PATHWAY_OF_INTERLEUKIN_1_IL1	-0.175819	-0.0205893	-0.143657	-0.00650567	0.058815	0.041751	0.120152	0.555736
REACTOME_GLUCONEOGENESIS	0.0103365	-0.00546615	-0.00871144	-0.00480892	0.103422	-0.0659266	0.057495	0.555656
REACTOME_APOPTOTIC_CLEAVAGE_OF_CELLULAR_PROTEINS	0.0165522	-0.0218746	0.00690544	-0.0578512	0.0132133	-0.0163029	0.0360874	0.555416
REACTOME_NONSENSE_MEDIATED_DECAY_NMD	-0.00313566	0.000862159	0.00179141	-0.000517535	0.0102508	-0.00111207	0.0100529	0.554778
KEGG_AMINO_SUGAR_AND_NUCLEOTIDE_SUGAR_METABOLISM	-0.124827	0.0139385	-0.136617	0.0659251	0.298985	-0.134793	0.159293	0.554487
REACTOME_DISEASES_OF_IMMUNE_SYSTEM	-0.0962841	0.00187371	-0.141969	0.0575582	0.0403826	0.0270871	0.0992391	0.554478
BROWNE_HCMV_INFECTION_10HR_DN	0.00777208	-0.0191719	-0.0759789	0.0603901	-0.035903	-0.0668105	0.218302	0.553137
MARSON_BOUND_BY_FOXP3_UNSTIMULATED	0.000556801	-0.00121512	-0.0143389	0.0212878	0.00661364	-0.00129324	0.0406345	0.55258
MARTINEZ_RB1_AND_TP53_TARGETS_DN	-0.00059761	0.00147784	-0.0175645	0.0184187	0.00774231	-0.00316922	0.0220489	0.552478
KEGG_LYSOSOME	-0.0270934	-0.0137706	0.00456906	-0.083423	-0.00545118	0.013616	0.0738896	0.55189
CAFFAREL_RESPONSE_TO_THC_24HR_5_DN	0.038765	0.00879007	-0.0447245	-0.0038138	0.124055	-0.0131616	0.00406938	0.551738
REACTOME_MATURATION_OF_SARS_COV_2_SPIKE_PROTEIN	-0.0089785	0.0346718	-0.0917133	0.0960915	-0.0100274	0.026442	0.171423	0.551191
ROY_WOUND_BLOOD_VESSEL_UP	0.132231	-0.00798041	-0.278301	0.0375567	0.032012	0.0979476	0.0150364	0.551185
REACTOME_METABOLISM_OF_CARBOHYDRATES	-0.00536753	-0.0121287	-0.0334272	0.0272463	0.108217	-0.0519832	0.0638497	0.549981
ELVIDGE_HYPOXIA_BY_DMOG_UP	-0.0497338	-0.0415515	-0.111848	0.107272	0.0901636	-0.0134464	0.193357	0.549328
HATADA_METHYLATED_IN_LUNG_CANCER_UP	-0.0432758	2.16959e-05	0.0162311	-0.0123407	0.0822548	-0.0312103	0.119373	0.54897
GAUSSMANN_MLL_AF4_FUSION_TARGETS_E_UP	0.0275079	0.0264367	-0.144142	0.0798956	-0.0601686	0.0327129	0.140948	0.548423
NAKAMURA_TUMOR_ZONE_PERIPHERAL_VS_CENTRAL_UP	0.0189245	0.0207395	0.000775886	0.0132893	0.0246315	-0.00122128	0.0113095	0.548284
KEGG_CARDIAC_MUSCLE_CONTRACTION	0.0268886	0.00107114	-0.011468	-0.00824826	0.0372061	0.00328391	0.00122713	0.548174
NUYTTEN_NIPP1_TARGETS_UP	-0.0139449	-0.0065686	-0.0425443	0.0294569	-0.0102791	0.0102949	0.0823604	0.547795
REACTOME_RESPONSE_OF_EIF2AK4_GCN2_TO_AMINO_ACID_DEFICIENCY	-0.00534694	0.0016526	-0.00424129	0.00343829	0.00770341	0.00149169	0.00705735	0.547583
MENSE_HYPOXIA_UP	-0.0168305	-0.030526	-0.138474	0.214375	0.163772	-0.0407064	0.351715	0.547466
APPIERTO_RESPONSE_TO_FENRETINIDE_DN	-0.0167311	0.011079	-0.0307169	0.0255694	0.102504	-0.0185702	0.0426986	0.547418
WP_VITAMIN_B12_METABOLISM	-0.0859745	-0.0373071	-0.0531833	0.0689771	0.0425217	-0.0860678	0.410004	0.547267
REACTOME_NUCLEOTIDE_SALVAGE	0.0833073	-0.0399352	-0.0608905	-0.0528841	0.412603	-0.0522665	0.0927307	0.546752
RODWELL_AGING_KIDNEY_NO_BLOOD_DN	0.00109217	0.00466269	-0.00745185	0.0189126	0.00249396	0.0104629	0.0490031	0.546213
GAUSSMANN_MLL_AF4_FUSION_TARGETS_G_DN	-0.143113	0.00742148	0.0183279	-0.115685	0.0435273	-0.0278364	0.23702	0.545705
SIG_IL4RECEPTOR_IN_B_LYPHOCYTES	-0.0887319	0.0593862	-0.0684226	-0.144313	0.00957708	0.0860252	0.0287793	0.544965
KAAB_FAILED_HEART_ATRIUM_DN	-0.0414089	0.00838459	-0.0352712	0.0183116	0.0459226	0.0132406	0.0421962	0.544742
BAKKER_FOXO3_TARGETS_DN	0.0514941	-0.0112016	-0.00878198	0.0377171	0.0490537	-0.0214058	0.0734816	0.54474
CHYLA_CBFA2T3_TARGETS_UP	0.0382103	-0.0197868	-0.0328232	0.00528548	-0.0150841	0.00142635	0.0414392	0.544132
REACTOME_SENSORY_PROCESSING_OF_SOUND	0.0106208	0.00443404	-0.00327688	-0.00887461	-0.0184478	-0.0128647	0.0389074	0.544
NABA_MATRISOME	0.0845127	0.0283931	-0.149664	0.0768981	-0.0517389	0.0148575	0.103069	0.543897
GREGORY_SYNTHETIC_LETHAL_WITH_IMATINIB	0.00656233	-0.000955414	-0.0153257	0.018778	-0.0130936	-0.0107624	0.081858	0.54361
JIANG_AGING_HYPOTHALAMUS_UP	-0.014541	0.00306338	-0.0142949	0.0130498	0.083999	-0.00979326	0.0402718	0.543483
FARMER_BREAST_CANCER_BASAL_VS_LULMINAL	-0.0425008	-0.024387	-0.0144636	0.0118802	0.0471116	-0.00324843	0.112654	0.543186
MAHAJAN_RESPONSE_TO_IL1A_UP	-0.0858729	-0.00385868	-0.159483	0.102038	0.0225698	0.0297635	0.177632	0.542683
BIOCARTA_NTHI_PATHWAY	-0.269782	-0.0202461	-0.203353	0.0220313	0.138732	0.0120015	0.184345	0.542639
SHIN_B_CELL_LYMPHOMA_CLUSTER_2	-0.109791	0.0398124	-0.201957	0.0213416	-0.020875	0.0933489	0.0810585	0.542525
SCHLOSSER_SERUM_RESPONSE_DN	0.0146174	0.000929641	-0.0221916	0.0185127	-0.00340346	-0.00227583	0.0249791	0.542013
BERENJENO_ROCK_SIGNALING_NOT_VIA_RHOA_DN	-0.0610408	0.0368956	-0.0805613	0.0458897	-0.0398804	0.00355741	0.15659	0.541372
AMIT_EGF_RESPONSE_40_HELA	-0.131908	0.0152407	-0.129471	0.0191834	0.0194542	0.0448234	0.0994762	0.541132
HUPER_BREAST_BASAL_VS_LUMINAL_UP	0.0823556	-0.0337825	-0.110738	0.0891131	0.031013	-0.0164869	0.106007	0.540595
ELVIDGE_HYPOXIA_BY_DMOG_DN	0.00769594	0.0375472	0.0127	0.037238	0.188688	-0.0298406	0.105563	0.540061
LE_EGR2_TARGETS_DN	0.149867	-0.0571243	-0.0932327	-0.057111	0.0325061	0.00479862	0.017737	0.53971
MATZUK_SPERMATOZOA	0.0366222	-0.00289354	-0.0858863	0.0641182	0.0505982	-0.00805187	0.0401384	0.53947
STAEGE_EWING_FAMILY_TUMOR	-0.00546578	0.00256911	-0.000750458	0.0207159	0.0109637	-0.00108743	0.0823381	0.538818
KEGG_CYTOSOLIC_DNA_SENSING_PATHWAY	-0.109295	-0.0115474	-0.0692339	-0.00158258	0.0101094	-0.0180863	0.0879207	0.538536
DACOSTA_ERCC3_ALLELE_XPCS_VS_TTD_UP	-0.0447941	0.0257578	-0.11229	-0.0808621	-0.0538936	0.0184477	-0.0385401	0.537862
MOOTHA_VOXPHOS	-0.026227	0.00361101	-0.0385383	-0.0242304	0.118127	0.00939547	0.011921	0.537177
BILD_SRC_ONCOGENIC_SIGNATURE	-0.00990885	-0.103803	-0.108801	0.0174015	0.0688026	0.0974274	0.138451	0.537034
WP_REGULATION_OF_MICROTUBULE_CYTOSKELETON	0.0230308	0.057236	-0.027742	0.0539329	-0.0283716	-0.042326	0.154643	0.53665
COULOUARN_TEMPORAL_TGFB1_SIGNATURE_DN	-0.0207793	-0.0291311	-0.0661651	-0.0322577	0.0142054	0.0525803	0.0100191	0.536589
WP_RENIN_ANGIOTENSIN_ALDOSTERONE_SYSTEM_RAAS	-0.0549774	-0.000984428	-0.0627338	0.0161266	0.073508	-0.0012349	0.0298482	0.536521
BROWNE_HCMV_INFECTION_30MIN_UP	-0.172321	0.0112723	-0.0979512	0.0403524	0.0730841	0.0210996	0.21051	0.536322
BIOCARTA_GPCR_PATHWAY	-0.0774655	0.0329488	-0.0813075	0.0528085	0.033089	0.00780268	0.0929195	0.53628
REACTOME_BINDING_AND_UPTAKE_OF_LIGANDS_BY_SCAVENGER_RECEPTORS	0.0298763	0.0305372	-0.0760127	0.0289724	-0.0547141	0.039965	0.0874867	0.535948
REACTOME_METABOLISM_OF_WATER_SOLUBLE_VITAMINS_AND_COFACTORS	0.00890766	-0.0270926	-0.12723	0.137273	0.0272071	0.00695635	0.221174	0.535695
BOYAULT_LIVER_CANCER_SUBCLASS_G2	0.0278511	-0.144445	-0.0642389	-0.211668	0.34624	-0.0434977	0.0680541	0.535587
WP_GENES_INVOLVED_IN_MALE_INFERTILITY	0.0492482	-0.0492214	-0.0689114	0.0669011	-0.0260945	0.0094179	0.237177	0.535494
BYSTRYKH_HEMATOPOIESIS_STEM_CELL_SCP2_QTL_TRANS	-0.0252718	0.0307987	-0.105007	-0.010609	0.0103483	0.0242489	-0.0241333	0.535359
AMIT_EGF_RESPONSE_240_HELA	0.00302591	-0.0280307	-0.0298788	0.0398177	0.0303656	-0.00723138	0.0893861	0.534766
JINESH_BLEBBISHIELD_VS_LIVE_CONTROL_UP	-0.042449	-0.00427176	-0.0652869	0.032752	0.010373	0.00865485	0.0563218	0.534569
STEGER_ADIPOGENESIS_DN	-0.00224889	0.0378896	-0.181299	0.13123	0.0455248	0.0140738	0.0969708	0.534277
REACTOME_ESTROGEN_DEPENDENT_NUCLEAR_EVENTS_DOWNSTREAM_OF_ESR_MEMBRANE_SIGNALING	-0.0655713	0.00795959	-0.0720875	0.040506	0.080255	0.0669916	0.0914835	0.533605
DASU_IL6_SIGNALING_SCAR_UP	0.00488484	-0.0170193	-0.0990009	-0.0210138	-0.0134876	0.0849449	0.0303148	0.533396
PID_MET_PATHWAY	-0.0325636	0.0363056	-0.0197431	0.0184748	0.00268328	0.019282	0.0669329	0.533149
KEGG_ARGININE_AND_PROLINE_METABOLISM	-0.0659129	-0.0243573	-0.00790186	0.0388292	0.106036	-0.0483502	0.224296	0.532904
VALK_AML_CLUSTER_11	0.0882228	0.0528683	-0.0894951	-0.00322791	-0.0896149	0.0125206	0.0783007	0.532305
YAO_TEMPORAL_RESPONSE_TO_PROGESTERONE_CLUSTER_0	0.144294	-0.111856	-0.215684	0.164404	-0.0936624	-0.132354	0.481711	0.531908
BENPORATH_CYCLING_GENES	-0.0211114	0.0149514	-0.0286871	0.0159786	0.00427485	0.0191012	0.0321407	0.530468
BURTON_ADIPOGENESIS_2	0.0368717	-0.0362514	-0.0773796	0.0819379	0.081317	-0.00338623	0.0928253	0.530379
ZHONG_SECRETOME_OF_LUNG_CANCER_AND_FIBROBLAST	-0.00224719	0.0122473	-0.0313499	0.030359	0.0117194	0.00479751	0.0267367	0.530249
BLANCO_MELO_BRONCHIAL_EPITHELIAL_CELLS_INFLUENZA_A_DEL_NS1_INFECTION_DN	0.20854	0.236853	0.0980648	-0.39817	0.430665	-0.196716	0.101631	0.529599
MARTINEZ_RB1_TARGETS_DN	-0.00595986	-0.00421394	-0.0279133	0.00975755	0.0115682	0.0100656	0.00802183	0.529567
LI_WILMS_TUMOR_VS_FETAL_KIDNEY_2_UP	0.00188978	0.0113263	0.0140707	0.0861503	0.117953	-0.0390173	0.217071	0.529518
NABA_BASEMENT_MEMBRANES	0.227907	0.0862516	-0.330194	-0.0254461	-0.32772	0.0752336	0.270574	0.529375
KEGG_INSULIN_SIGNALING_PATHWAY	-0.0597069	0.0160595	-0.0477254	0.0303571	0.0758782	0.00177652	0.0573873	0.529342
KAMMINGA_EZH2_TARGETS	0.0356771	0.125635	0.0858898	0.0811835	0.402279	-0.00710778	0.236987	0.529192
REACTOME_G0_AND_EARLY_G1	-0.031366	-0.0133375	0.0240037	-0.143449	0.333803	-0.0563387	0.122317	0.528396
MILI_PSEUDOPODIA_HAPTOTAXIS_DN	0.0176054	0.0195801	-0.0547521	0.000671043	-0.0523189	0.0169688	0.0456416	0.527677
REACTOME_INTERLEUKIN_10_SIGNALING	-0.0388555	-0.0699684	-0.470424	0.399738	0.202187	0.105033	0.449783	0.52685
HELLER_HDAC_TARGETS_SILENCED_BY_METHYLATION_UP	-0.0494667	0.0079265	-0.0848318	0.0222746	-0.00337556	0.0210083	0.0359563	0.526544
CHICAS_RB1_TARGETS_GROWING	0.0665504	-0.00224707	0.0369637	-0.0127121	0.108873	-0.0157535	0.0778233	0.526527
VALK_AML_CLUSTER_16	0.172578	-0.0319746	-0.193844	0.131697	0.0650246	-0.033686	0.110392	0.52635
WHITFIELD_CELL_CYCLE_S	-0.0249828	-0.00175371	-0.00322212	-0.0160051	0.12678	0.00440365	0.0540302	0.52625
REACTOME_SIGNALING_BY_BMP	-0.0106197	0.0614755	-0.224686	0.0600196	-0.100824	0.0809031	0.116095	0.52592
ZHANG_GATA6_TARGETS_DN	0.371471	-0.0243002	-0.0501066	-0.350431	0.405446	-0.138367	0.0222665	0.525905
SU_LIVER	-0.169563	0.00796258	-0.106268	-0.382568	0.95022	-1.16807	0.533621	0.525902
PID_FAS_PATHWAY	0.00401125	-0.0379962	0.0216728	-0.102397	0.148231	-0.0512346	0.0747253	0.52539
DITTMER_PTHLH_TARGETS_DN	0.0277837	-0.0164813	-0.0310983	0.0638075	0.0392428	-0.0234796	0.107969	0.525352
WP_BRAINDERIVED_NEUROTROPHIC_FACTOR_BDNF_SIGNALING_PATHWAY	-0.0460975	0.0025224	-0.0411772	0.0198639	0.0158295	0.00738931	0.0501101	0.52496
WP_3Q29_COPY_NUMBER_VARIATION_SYNDROME	-0.0225021	0.0312884	-0.0556353	-0.0322169	0.0168303	0.062986	0.00413479	0.524928
XU_GH1_AUTOCRINE_TARGETS_DN	-0.00126381	0.0129069	-0.0207397	0.0190102	-0.0205483	0.00185954	0.0637069	0.524697
MOREAUX_MULTIPLE_MYELOMA_BY_TACI_UP	-0.0401165	-0.0257682	-0.0364895	0.00568163	-0.00898592	0.00828342	0.0865134	0.524642
RAMASWAMY_METASTASIS_UP	0.0045195	0.0153759	0.00991471	0.0218641	0.0749128	-0.0401795	0.0696904	0.523878
REACTOME_CARGO_TRAFFICKING_TO_THE_PERICILIARY_MEMBRANE	-0.0438328	0.0212912	-0.0288166	0.00771774	-0.00178187	0.0119157	0.0507075	0.522805
REACTOME_CELLULAR_RESPONSE_TO_STARVATION	-0.00635196	0.00038001	-0.00819575	0.00291802	0.0104173	0.00449039	0.00502201	0.522113
MOOTHA_HUMAN_MITODB_6_2002	-0.0164276	-0.00157158	-0.0143175	-0.0216516	0.109888	-0.00720616	0.0243569	0.522078
WP_MAMMARY_GLAND_DEVELOPMENT_PATHWAY_PREGNANCY_AND_LACTATION_STAGE_3_OF_4	-0.00748033	0.0368176	-0.188111	0.140385	0.0667829	0.0415008	0.0998536	0.521807
BILANGES_SERUM_AND_RAPAMYCIN_SENSITIVE_GENES	-0.0101799	-0.0020724	-0.00314801	-0.00209716	0.0146999	-0.00446905	0.00999874	0.521669
HOFFMANN_IMMATURE_TO_MATURE_B_LYMPHOCYTE_DN	-0.0949969	-0.0106482	-0.031398	0.00366337	0.0649672	-0.00463081	0.113213	0.521316
ROZANOV_MMP14_TARGETS_UP	0.0151185	-0.00375189	-0.0353409	0.0269788	-0.040628	-0.0191088	0.123499	0.521178
GUO_HEX_TARGETS_UP	0.0409708	0.00174658	-0.0173306	0.0181142	-0.0490006	-0.0844936	0.217765	0.521023
REACTOME_PKMTS_METHYLATE_HISTONE_LYSINES	-0.101983	0.00258926	0.0145038	0.0257739	0.13259	-0.0223037	0.255817	0.520547
KIM_ALL_DISORDERS_CALB1_CORR_UP	-0.00475006	-0.00585341	-0.00169095	-0.00660963	0.0363538	-0.0113365	0.0157228	0.52026
FLECHNER_BIOPSY_KIDNEY_TRANSPLANT_OK_VS_DONOR_UP	-0.00418323	-0.000456784	-0.00594395	0.0113364	-0.000240725	-0.00194561	0.0383403	0.520112
DAWSON_METHYLATED_IN_LYMPHOMA_TCL1	-0.102641	0.045809	-0.164799	0.134194	0.11859	-0.0111145	0.137072	0.520032
DESERT_STEM_CELL_HEPATOCELLULAR_CARCINOMA_SUBCLASS_UP	0.00424321	0.0105388	-0.0347551	0.0550878	0.0223426	-0.00116221	0.0637156	0.519791
WP_INTERACTIONS_BETWEEN_IMMUNE_CELLS_AND_MICRORNAS_IN_TUMOR_MICROENVIRONMENT	-0.407299	0.0221536	-0.23159	0.0763257	0.0621619	-0.0430948	0.459372	0.519669
PID_PRL_SIGNALING_EVENTS_PATHWAY	-0.0251506	0.00105618	-0.0571614	0.0334484	0.0249678	0.0177835	0.0348194	0.519386
WP_TNF_RELATED_WEAK_INDUCER_OF_APOPTOSIS_TWEAK_SIGNALING_PATHWAY	-0.0983145	0.00596679	-0.0490052	0.00114027	0.0225706	0.0186324	0.0959831	0.519076
PID_NEPHRIN_NEPH1_PATHWAY	-0.0773185	0.0256303	-0.0622757	-0.000378963	0.0949938	0.0105483	0.0259021	0.518041
PID_PDGFRA_PATHWAY	-0.0627404	0.00584233	-0.0152569	0.00172864	0.0544559	-0.00929759	0.067995	0.517504
BRUNO_HEMATOPOIESIS	0.00853614	0.020059	-0.133655	0.133179	-0.0157409	-0.040695	0.18285	0.517332
GROSS_HIF1A_TARGETS_DN	0.0112504	-0.0245939	-0.113618	0.164321	0.135092	-0.083873	0.21116	0.517229
FOURNIER_ACINAR_DEVELOPMENT_LATE_2	0.00378182	0.038121	-0.0136644	0.059422	0.071782	-0.00986121	0.0604568	0.516917
MANNE_COVID19_NONICU_VS_HEALTHY_DONOR_PLATELETS_DN	0.0976744	-0.0562514	-0.0531996	0.101581	0.052389	-0.092772	0.240506	0.516022
REACTOME_TRANSPORT_OF_VITAMINS_NUCLEOSIDES_AND_RELATED_MOLECULES	0.0142792	-0.0325044	0.00341971	0.0351508	0.0780263	0.0139928	0.115407	0.515752
TONKS_TARGETS_OF_RUNX1_RUNX1T1_FUSION_HSC_DN	0.0247463	0.0209269	-0.0983146	0.0589804	0.0134349	0.0366963	0.0371206	0.515704
ZHANG_RESPONSE_TO_CANTHARIDIN_DN	-0.0102968	0.00706259	-0.00349895	-0.00638138	0.130519	-0.0031194	0.0434706	0.515684
GRAHAM_CML_QUIESCENT_VS_NORMAL_QUIESCENT_UP	-0.00577643	0.0777271	-0.0378246	0.00153205	0.104854	-0.0270656	0.000116083	0.515587
KEGG_PENTOSE_PHOSPHATE_PATHWAY	-0.00879531	-0.0348048	-0.0337041	0.00451045	0.184613	-0.0697748	0.0751788	0.515524
RICKMAN_TUMOR_DIFFERENTIATED_WELL_VS_POORLY_DN	0.0549224	-0.0443073	-0.012091	-0.00998391	0.03435	-0.0204773	0.0502291	0.514955
ZHAN_MULTIPLE_MYELOMA_CD1_UP	-0.0489287	-0.096214	-0.0395125	0.0346037	0.17585	-0.0234466	0.195264	0.514649
PUIFFE_INVASION_INHIBITED_BY_ASCITES_DN	-0.0185402	-0.0114487	-0.0744354	0.0614307	-0.000706621	0.00825844	0.0996705	0.514586
REACTOME_WNT_LIGAND_BIOGENESIS_AND_TRAFFICKING	-0.0323055	0.0173657	-0.103333	-0.00593601	0.0760868	0.0880251	0.00570011	0.51397
ZHAN_MULTIPLE_MYELOMA_PR_UP	0.665223	0.255001	-0.0234372	-0.134728	0.16208	-0.0682994	0.165292	0.513533
MULLIGAN_NTF3_SIGNALING_VIA_INSR_AND_IGF1R_UP	0.0286072	-0.00734265	-0.0204032	0.0734997	0.164423	0.0232196	0.100358	0.513532
WIKMAN_ASBESTOS_LUNG_CANCER_DN	-0.0641229	-0.0264838	-0.0740605	0.0879943	0.101058	-0.0493539	0.162986	0.513216
PID_PLK1_PATHWAY	-0.0489512	0.0304694	0.0018742	0.02136	0.057412	-0.0434075	0.107453	0.512996
NABA_COLLAGENS	-0.169383	0.0912608	-0.133712	-0.39963	-0.422895	0.0229983	0.454425	0.512038
REACTOME_COLLAGEN_CHAIN_TRIMERIZATION	-0.169383	0.0912608	-0.133712	-0.39963	-0.422895	0.0229983	0.454425	0.512038
APPIERTO_RESPONSE_TO_FENRETINIDE_UP	0.025348	0.00740521	-0.016511	0.0559531	3.62405e-05	-0.0228179	0.133659	0.511943
WP_PHYSIOLOGICAL_AND_PATHOLOGICAL_HYPERTROPHY_OF_THE_HEART	-0.0533255	0.000222253	-0.0358204	0.0223991	0.0444304	-0.000804193	0.0560936	0.511505
NAKAMURA_TUMOR_ZONE_PERIPHERAL_VS_CENTRAL_DN	-0.0149212	0.0103683	-0.0569616	0.0734157	-0.00365325	-0.017061	0.134239	0.510919
REACTOME_BRANCHED_CHAIN_AMINO_ACID_CATABOLISM	-0.229068	0.0415612	-0.0353072	-0.224255	0.476216	-0.26857	0.153627	0.510724
BYSTRYKH_HEMATOPOIESIS_STEM_CELL_AND_BRAIN_QTL_TRANS	-0.00696518	-0.0152375	-0.0211571	0.0279601	0.0534753	0.00577129	0.0461853	0.510627
RODRIGUES_THYROID_CARCINOMA_ANAPLASTIC_UP	-0.00205597	0.00658421	-0.0022831	0.0231401	-0.00816013	-0.0348862	0.131692	0.509729
BOYAULT_LIVER_CANCER_SUBCLASS_G123_UP	0.00271313	0.00613332	-0.0270634	0.0788487	0.10136	0.0076195	0.0948117	0.509597
EBAUER_TARGETS_OF_PAX3_FOXO1_FUSION_DN	-0.0796153	-0.00974523	-0.150515	-0.0594317	-0.173606	0.13865	0.281814	0.508276
POMEROY_MEDULLOBLASTOMA_DESMOPLASIC_VS_CLASSIC_DN	0.0309468	0.00313872	-0.0159149	0.0231396	-0.0121075	-0.00441368	0.0544735	0.508104
MARTORIATI_MDM4_TARGETS_NEUROEPITHELIUM_UP	-0.0143559	-0.027401	-0.0568704	0.10725	0.125725	-0.0487429	0.169972	0.507461
YAGI_AML_SURVIVAL	-0.02144	0.0122123	-0.0363842	0.00788735	0.0726828	0.00310295	0.00725014	0.507077
CORRE_MULTIPLE_MYELOMA_DN	-0.10463	-0.0705985	-0.0305302	-0.103015	0.0671306	0.00577717	0.0700951	0.506208
WP_ADIPOGENESIS	-0.101905	-0.00296122	-0.110145	0.100496	0.0389212	0.0300144	0.207999	0.505729
FOURNIER_ACINAR_DEVELOPMENT_LATE_DN	-0.019067	0.00581654	0.0149535	0.0589594	0.185448	-0.0779815	0.184057	0.50567
BAELDE_DIABETIC_NEPHROPATHY_UP	0.0406925	-0.0105676	-0.104802	0.0519968	0.03222	0.0206895	0.0220977	0.50551
HILLION_HMGA1_TARGETS	-0.00123214	-0.000259803	-0.00268993	0.0144176	0.0189659	0.00124525	0.0232173	0.505156
REACTOME_DISEASES_OF_GLYCOSYLATION	0.0916821	0.00712341	-0.177163	0.199251	0.100078	-0.122255	0.178282	0.504623
REACTOME_GLYOXYLATE_METABOLISM_AND_GLYCINE_DEGRADATION	0.0281809	-0.0165179	0.0647886	-0.072717	0.179621	-0.126203	0.166363	0.504459
WP_MELATONIN_METABOLISM_AND_EFFECTS	-0.00711786	0.0137179	-0.107369	0.0840656	-0.0161518	-0.0231371	0.0947939	0.503925
LEE_LIVER_CANCER_ACOX1_DN	-0.122708	0.00441167	-0.114994	-0.00781476	0.0835258	0.155918	0.118721	0.503761
GUO_TARGETS_OF_IRS1_AND_IRS2	-0.0184585	0.00605598	-0.0177625	0.000964537	0.0069474	0.0137734	0.0109473	0.503666
WP_CARDIAC_HYPERTROPHIC_RESPONSE	-0.072578	0.0137208	-0.0911672	0.0398721	0.0388932	0.0239484	0.0512623	0.503592
WANG_MLL_TARGETS	0.019174	-0.0597543	-0.146258	0.118104	-0.0347667	-0.0127714	0.223079	0.501883
HIRSCH_CELLULAR_TRANSFORMATION_SIGNATURE_UP	-0.053446	-0.0179764	-0.0786945	0.0911825	0.0852106	-0.00581362	0.132902	0.500609
PID_P38_ALPHA_BETA_DOWNSTREAM_PATHWAY	-0.0447812	-0.00927475	-0.0661382	0.0834836	0.066971	-0.0377995	0.124202	0.499695
WP_VITAMIN_D_IN_INFLAMMATORY_DISEASES	-0.298845	-0.0179924	-0.24722	0.0815602	0.164006	0.0356835	0.206391	0.498492
LIU_CDX2_TARGETS_UP	-0.704067	-0.101017	-0.671003	-0.136407	-0.0946948	0.164216	0.200046	0.49817
WP_APOPTOSIS	-0.106464	0.0109832	-0.101147	0.0181119	0.049917	0.0378961	0.0515566	0.497424
BILBAN_B_CLL_LPL_DN	-0.0760647	-0.0225265	-0.0512716	0.028257	0.0583863	-0.00607174	0.0861222	0.497065
RASHI_RESPONSE_TO_IONIZING_RADIATION_6	-0.00262489	0.011966	-0.107727	0.122488	0.00926486	-0.0398037	0.150786	0.496714
WP_TRANSSULFURATION_AND_ONE_CARBON_METABOLISM	0.0344252	-0.0147862	0.149842	-0.322704	0.296378	-0.240488	0.261904	0.49479
REACTOME_PYRUVATE_METABOLISM	0.019059	-0.0299195	-0.0113136	-0.0206126	0.0798177	-0.0400585	0.0230026	0.494457
WP_TARGET_OF_RAPAMYCIN_TOR_SIGNALING	0.0485655	0.0108	0.0133114	-0.00541784	0.0758172	-0.0585284	0.0459317	0.494435
WP_NOCGMPPKG_MEDIATED_NEUROPROTECTION	0.0166626	-0.00329067	-0.0870141	0.0753166	0.0997836	0.00446393	0.0399984	0.494083
BYSTRYKH_HEMATOPOIESIS_STEM_CELL_QTL_TRANS	-0.00533006	0.00477493	-0.00666876	0.00154563	-0.0136128	0.00188186	0.0315158	0.494057
KINSEY_TARGETS_OF_EWSR1_FLII_FUSION_UP	0.0103532	0.0137379	0.0258844	-0.00174488	0.0810128	-0.0298327	0.0572254	0.493858
FEVR_CTNNB1_TARGETS_DN	-0.0118659	0.0121808	0.0299961	0.0244185	0.0855534	-0.0388207	0.123668	0.493369
DOANE_BREAST_CANCER_ESR1_UP	-0.0326423	-0.0607589	-0.0580498	-0.0147196	0.081391	0.0860651	0.0725373	0.493015
URS_ADIPOCYTE_DIFFERENTIATION_UP	0.0347639	-0.028813	0.0440054	-0.0722876	0.119424	-0.0984838	0.109012	0.492931
SESTO_RESPONSE_TO_UV_C1	-0.0272953	-0.00519979	-0.0545269	0.0766881	0.0336341	0.00815787	0.118874	0.492672
NAKAYAMA_SOFT_TISSUE_TUMORS_PCA1_UP	0.126278	-0.0143457	-0.236533	0.058025	-0.0722084	0.0315234	0.0514794	0.492173
WP_NOTCH_SIGNALING_PATHWAY_NETPATH	-0.0409218	-0.0195684	-0.0727133	0.0127313	0.0182234	0.0367139	0.0279925	0.492079
REACTOME_PLASMA_LIPOPROTEIN_ASSEMBLY_REMODELING_AND_CLEARANCE	0.0545548	-0.00238148	-0.0383802	0.0119077	-0.0049682	-0.0120361	0.0176454	0.492006
ZHONG_RESPONSE_TO_AZACITIDINE_AND_TSA_UP	0.00903978	-0.0165119	-0.09244	0.058893	0.0595534	0.0263368	0.0338031	0.491227
PID_MYC_REPRESS_PATHWAY	0.065562	-0.0396114	-0.0346038	-0.0130327	-0.0281324	-0.0148693	0.0565883	0.490354
LIU_TARGETS_OF_VMYB_VS_CMYB_DN	-0.0785846	-0.0468925	-0.119398	0.0497411	0.0831455	0.0900639	0.109972	0.49011
KEGG_OLFACTORY_TRANSDUCTION	0.0190288	0.00267057	-0.0842262	0.0124174	0.0606429	-0.00563915	-0.0247788	0.490106
ALONSO_METASTASIS_EMT_UP	0.00367619	0.0758079	-0.123493	0.0273817	-0.085204	0.0259073	0.0610647	0.489909
KEGG_JAK_STAT_SIGNALING_PATHWAY	0.0269117	-0.0758445	-0.146773	0.17648	0.087534	0.077041	0.255994	0.489575
BOGNI_TREATMENT_RELATED_MYELOID_LEUKEMIA_UP	-0.00738249	-0.0167434	0.0139753	0.0279862	0.0853357	-0.0827388	0.15097	0.48919
WANG_TARGETS_OF_MLL_CBP_FUSION_DN	0.0509264	-0.00295967	0.0118848	-0.0196388	0.16379	-0.030451	0.0471795	0.489149
TSENG_IRS1_TARGETS_UP	0.00498714	0.0413283	-0.0882916	0.0343731	-0.0195447	0.0184035	0.0187595	0.488899
PID_ILK_PATHWAY	-0.0562674	0.0179715	-0.0305552	0.0336747	0.056575	0.00811252	0.0663743	0.488522
LEIN_OLIGODENDROCYTE_MARKERS	0.00960986	-0.0253427	-0.0517822	0.0465602	0.0196049	0.0322884	0.067777	0.488453
SAFFORD_T_LYMPHOCYTE_ANERGY	-0.173022	-0.0691824	-0.0774557	0.000170374	0.0669531	0.0225433	0.206032	0.48834
TIEN_INTESTINE_PROBIOTICS_24HR_UP	0.0189163	0.025372	0.0077191	-0.0204411	0.0784016	-0.0113725	0.0100516	0.488144
BIOCARTA_STRESS_PATHWAY	-0.164457	-0.0150263	-0.122911	0.014163	0.115937	0.0187188	0.0769927	0.487644
BIOCARTA_NFAT_PATHWAY	-0.0277599	0.0330032	-0.0421029	0.0445834	-0.0275211	0.0148687	0.111712	0.48644
GUILLAUMOND_KLF10_TARGETS_UP	-0.0466063	-0.0354365	-0.0776855	0.0753776	-0.0494581	-0.0824927	0.280326	0.486104
SMID_BREAST_CANCER_RELAPSE_IN_BRAIN_UP	0.0559618	0.0360204	-0.237134	0.188907	-0.0968654	0.110444	0.290391	0.485724
REACTOME_COLLAGEN_DEGRADATION	0.137188	0.0281218	-0.154889	0.0262767	-0.210241	0.0721411	0.274282	0.484527
ZHENG_FOXP3_TARGETS_UP	-0.106663	-0.0715544	-0.225903	0.255731	0.0850323	0.0129603	0.417484	0.484513
SU_TESTIS	0.120207	0.029535	0.136816	-0.444962	0.169436	-0.501335	0.292863	0.484422
OSMAN_BLADDER_CANCER_UP	0.00212049	0.0143711	-0.0270073	0.0127985	-0.0473152	-0.0152438	0.0825088	0.484368
KYNG_ENVIRONMENTAL_STRESS_RESPONSE_NOT_BY_4NQO_IN_WS	-0.0798916	-0.0223103	-0.0131503	-0.0308255	0.137038	-0.0115124	0.0752752	0.484321
SIG_CHEMOTAXIS	0.0177321	0.0136901	0.00295466	-0.00129882	-0.0327771	0.00562321	0.0925818	0.484247
ONKEN_UVEAL_MELANOMA_UP	-0.0128991	0.0122681	-0.0493446	0.0411637	-0.0180463	0.0162972	0.0691436	0.484235
REACTOME_HEPARAN_SULFATE_HEPARIN_HS_GAG_METABOLISM	0.0906049	0.0704855	-0.276348	0.228171	0.0011432	-0.0559542	0.155	0.484157
REACTOME_ENERGY_DEPENDENT_REGULATION_OF_MTOR_BY_LKB1_AMPK	0.091906	0.0395973	-0.131195	-0.0950968	0.135136	0.0518786	-0.0861998	0.484002
CHAUHAN_RESPONSE_TO_METHOXYESTRADIOL_UP	-0.0257456	0.0148839	-0.0193815	0.00902654	0.0664679	0.0143963	0.0199262	0.483814
FARMER_BREAST_CANCER_APOCRINE_VS_BASAL	0.0602776	0.000353857	-0.0599788	-0.019995	-0.00683675	0.015564	-0.0115493	0.483542
MAGRANGEAS_MULTIPLE_MYELOMA_IGLL_VS_IGLK_DN	-0.28629	-0.0558918	-0.0453446	0.0715311	0.130021	-0.0190885	0.593829	0.483287
WP_GLYCOGEN_SYNTHESIS_AND_DEGRADATION	-0.0926361	0.0268572	-0.0339306	0.0301016	0.0707971	-0.0536678	0.0982057	0.483064
WP_GASTRIN_SIGNALING_PATHWAY	-0.0603775	-0.00809721	-0.0535136	0.0509943	0.0306425	-0.0226088	0.0969848	0.48298
VALK_AML_CLUSTER_2	-0.0968963	0.00570709	-0.269839	0.0784535	-0.0310371	0.0976917	0.0835943	0.482275
REACTOME_INTERACTIONS_OF_VPR_WITH_HOST_CELLULAR_PROTEINS	0.000954088	-0.0178549	0.0371596	0.00989838	0.0946741	0.0173628	0.122545	0.482172
ONO_AML1_TARGETS_DN	-0.097315	0.0121082	-0.124032	0.059532	0.0696022	0.0368051	0.0644815	0.481837
TARTE_PLASMA_CELL_VS_PLASMABLAST_DN	0.0227451	0.0242824	0.0137725	-0.0218675	0.105132	-0.0098705	0.0199962	0.481022
DEBIASI_APOPTOSIS_BY_REOVIRUS_INFECTION_DN	-0.0147968	0.0195268	-0.0305024	0.042017	0.0277342	-0.013808	0.0393016	0.480942
MATTIOLI_MULTIPLE_MYELOMA_WITH_14Q32_TRANSLOCATIONS	-0.0845689	0.00815114	-0.0640746	0.0524669	0.170288	-0.0553099	0.0873158	0.480919
EPPERT_PROGENITOR	0.0113225	0.0329175	0.0273482	0.0421241	0.0288848	-0.0583813	0.164218	0.480378
WP_NOVEL_INTRACELLULAR_COMPONENTS_OF_RIGILIKE_RECEPTOR_RLR_PATHWAY	-0.121397	-0.0146231	-0.00970515	-0.0451188	0.00972215	-0.0154468	0.154393	0.480351
LU_TUMOR_VASCULATURE_UP	0.014178	-0.011827	-0.0675043	0.101176	0.0212959	-0.054259	0.145259	0.47949
REACTOME_ER_TO_GOLGI_ANTEROGRADE_TRANSPORT	0.0139574	0.00302086	-0.053544	0.0277516	0.0944394	-0.00126674	0.003535	0.479084
DARWICHE_SKIN_TUMOR_PROMOTER_DN	-0.0252419	-0.0107126	-0.019372	0.0368863	0.0407061	-0.0278197	0.0767051	0.478984
WALLACE_PROSTATE_CANCER_RACE_DN	0.0196499	0.0137285	0.00611424	-0.0762523	0.0627559	-0.0651916	0.00372463	0.478912
REACTOME_RHOA_GTPASE_CYCLE	0.0298304	0.0188262	-0.0040342	0.0193301	-0.0300841	-0.0379911	0.106263	0.478842
REACTOME_CHONDROITIN_SULFATE_DERMATAN_SULFATE_METABOLISM	0.120738	0.0811814	-0.291819	0.281641	0.0345923	-0.0897557	0.195774	0.478592
BENPORATH_PRC2_TARGETS	-0.0236992	-0.0666398	-0.0412631	0.00526965	-5.80034e-05	-0.0188923	0.0799837	0.478536
ACEVEDO_NORMAL_TISSUE_ADJACENT_TO_LIVER_TUMOR_DN	0.00217061	-0.00599548	-0.00495094	-0.0288609	0.0531363	-0.00795411	0.000563253	0.478367
PID_SHP2_PATHWAY	0.0361404	0.0558442	-0.115974	0.0553235	-0.0718206	0.0511709	0.0881918	0.478183
ROSS_ACUTE_MYELOID_LEUKEMIA_CBF	-0.0281778	-0.0516695	-0.00566539	-0.0680176	-0.0448957	0.0499138	0.179574	0.478145
GARGALOVIC_RESPONSE_TO_OXIDIZED_PHOSPHOLIPIDS_GREEN_DN	-0.127026	-0.0320731	-0.0285313	0.0287923	0.172415	-0.124296	0.196573	0.477317
MATZUK_MEIOTIC_AND_DNA_REPAIR	0.00109053	0.0170986	0.00593057	0.00304926	-0.0088722	-0.0144864	0.0480061	0.476925
JI_RESPONSE_TO_FSH_DN	0.00467199	-0.000634209	0.00266402	0.0106922	-0.0179651	-0.00862834	0.102242	0.476897
BYSTROEM_CORRELATED_WITH_IL5_DN	0.0497294	0.00508501	-0.0665644	0.0547148	-0.0990906	0.00768161	0.21695	0.47517
GARCIA_TARGETS_OF_FLI1_AND_DAX1_DN	-0.0352629	0.0283551	0.0316784	-0.0529802	0.0836894	-0.0238338	0.0556338	0.473251
PID_HDAC_CLASSI_PATHWAY	-0.0909228	-0.00567126	-0.0719915	0.0629374	0.0661109	0.0180158	0.115506	0.473085
DAZARD_UV_RESPONSE_CLUSTER_G1	-0.0138733	0.0154106	-0.0311115	0.0250868	0.0285654	0.0127382	0.0149451	0.472677
KEGG_HUNTINGTONS_DISEASE	-0.0122489	-0.000772124	-0.0173648	-0.0091718	0.0691627	0.00471047	0.00494367	0.472489
GRAESSMANN_APOPTOSIS_BY_SERUM_DEPRIVATION_DN	0.00245135	-0.0344342	-0.081989	0.120098	0.118672	-0.0435181	0.131646	0.472308
TURASHVILI_BREAST_DUCTAL_CARCINOMA_VS_DUCTAL_NORMAL_UP	0.0441341	0.00622616	-0.0493311	-0.00300547	-0.0845155	-0.0291984	0.0857492	0.472263
MOOTHA_MITOCHONDRIA	-0.0172094	0.00777589	-0.0277182	-0.0148743	0.133663	0.00118291	0.00858143	0.471532
WANG_CISPLATIN_RESPONSE_AND_XPC_UP	0.083576	-0.0248785	-0.0242932	-0.0165638	0.0837003	-0.0261997	0.0109794	0.471484
GROSS_ELK3_TARGETS_DN	0.0655112	-0.0762632	-0.183854	0.226994	0.124536	-0.0430414	0.234528	0.470826
HERNANDEZ_MITOTIC_ARREST_BY_DOCETAXEL_2_UP	-0.0088697	-0.0251759	-0.141703	0.102319	-0.00562209	0.0336322	0.114691	0.470669
REACTOME_HS_GAG_BIOSYNTHESIS	0.104769	0.0678382	-0.291155	0.269818	0.00415259	-0.083062	0.196647	0.470664
BYSTROEM_CORRELATED_WITH_IL5_UP	-0.0398364	0.00949714	-0.0759475	0.0815305	0.0241273	0.00414901	0.0962537	0.470621
BIOCARTA_DEATH_PATHWAY	-0.070929	-0.0401652	-0.064705	-0.010729	0.0972972	0.00989607	0.0245399	0.470361
JINESH_BLEBBISHIELD_VS_LIVE_CONTROL_DN	0.0138916	-0.0111472	-0.045132	0.0360454	-0.0135151	0.0119161	0.0540603	0.470116
WU_APOPTOSIS_BY_CDKN1A_VIA_TP53	-0.0424031	0.0534544	-0.0216788	0.0583833	0.0865179	-0.0347119	0.0774982	0.469752
WOOD_EBV_EBNA1_TARGETS_UP	-0.0160492	0.0179349	-0.0562215	0.0120466	-0.0199001	0.0272681	0.0188654	0.469247
KEGG_FRUCTOSE_AND_MANNOSE_METABOLISM	-0.0602866	-0.00767168	-0.0665837	0.10386	0.178619	-0.0744609	0.140904	0.468513
VARELA_ZMPSTE24_TARGETS_DN	0.0488992	-0.00348633	-0.132141	0.068614	-0.0235204	0.0548469	0.0622182	0.467688
ZHONG_SECRETOME_OF_LUNG_CANCER_AND_ENDOTHELIUM	0.00179163	0.0124325	-0.0388971	0.0339593	-0.00922407	0.00182404	0.033842	0.467639
REACTOME_DEGRADATION_OF_THE_EXTRACELLULAR_MATRIX	0.100168	0.0139242	-0.0939206	0.0339036	-0.0885302	0.0202634	0.103757	0.467537
SHEPARD_BMYB_MORPHOLINO_UP	-0.0241481	0.00873751	-0.0392437	0.0413432	0.0375173	0.00104125	0.0362179	0.467273
KEGG_PROGESTERONE_MEDIATED_OOCYTE_MATURATION	0.00139519	0.0528705	0.0284549	-0.0519705	-0.0128433	-0.0324656	0.0659312	0.466761
REACTOME_SELENOAMINO_ACID_METABOLISM	-0.000120202	-0.00175385	-0.000698297	-0.000334897	0.00771804	0.00085496	0.00255152	0.465376
DUTERTRE_ESTRADIOL_RESPONSE_6HR_UP	-0.0623786	-0.0135147	-0.016193	-0.0401332	0.0701871	0.0337056	0.039379	0.465346
GARGALOVIC_RESPONSE_TO_OXIDIZED_PHOSPHOLIPIDS_YELLOW_UP	-0.219858	-0.0111185	-0.188016	0.0229779	-0.0178736	0.037856	0.126612	0.465194
WP_INSULIN_SIGNALING	-0.0716817	-0.0034118	-0.0446348	0.0100893	0.0423915	0.0159694	0.044926	0.465177
BROWNE_HCMV_INFECTION_48HR_UP	0.0398618	-0.0654987	-0.0309898	-0.00706756	0.0845776	0.00552944	0.0359156	0.464945
RICKMAN_HEAD_AND_NECK_CANCER_F	0.150781	0.125617	-0.0283823	0.0341547	-0.0576337	-0.21325	0.204606	0.464645
LIN_NPAS4_TARGETS_UP	-0.0150107	-0.0373164	0.0131171	-0.00494947	0.0525406	-0.0407532	0.0981874	0.464641
REACTOME_TRANSPORT_OF_MATURE_TRANSCRIPT_TO_CYTOPLASM	-0.0509445	0.0160576	-0.014662	0.0133896	0.0691063	0.0074921	0.046569	0.4638
MOLENAAR_TARGETS_OF_CCND1_AND_CDK4_UP	0.0174749	-0.155543	-0.116214	0.0140255	0.0192285	0.00253253	0.101147	0.463717
GOLDRATH_HOMEOSTATIC_PROLIFERATION	0.0115038	0.0125462	0.00216778	0.0365675	0.0574497	0.000582618	0.0393324	0.462804
ZHAN_MULTIPLE_MYELOMA_CD2_DN	-0.0631104	-0.00874649	-0.0373241	0.021564	0.140777	0.0224326	0.0646449	0.462755
YANG_BREAST_CANCER_ESR1_LASER_DN	-0.0748798	-0.00850949	-0.0410939	0.0444259	0.0791056	0.017235	0.0984172	0.462499
CONCANNON_APOPTOSIS_BY_EPOXOMICIN_UP	-0.0299826	-0.00664192	-0.0397939	0.00572656	0.0200102	0.0105623	0.005212	0.462352
NAKAMURA_METASTASIS	-0.163884	-0.0205956	0.00637889	0.00822837	0.126396	-0.0643259	0.263817	0.462234
JAZAG_TGFB1_SIGNALING_UP	0.0197201	-0.00533847	0.0133655	-0.0386616	0.12541	-0.0438887	0.0310302	0.460615
WP_NRF2ARE_REGULATION	-0.10348	0.0257563	-0.166302	0.0880596	-0.0521213	0.0602361	0.158211	0.460375
FARDIN_HYPOXIA_11	-0.0168546	-0.0654017	-0.115089	0.292488	0.230345	-0.0878452	0.428819	0.460256
PUIFFE_INVASION_INHIBITED_BY_ASCITES_UP	0.0370143	0.00784956	-0.0164795	0.0526549	0.0416463	-0.0468654	0.0629164	0.459979
BENPORATH_MYC_MAX_TARGETS	-0.0148002	-0.00432811	0.00497341	-0.00986389	0.0546642	-0.0114091	0.0260459	0.459723
BIOCARTA_KERATINOCYTE_PATHWAY	-0.106275	0.0355825	-0.107797	0.0402175	0.028068	0.0214854	0.05072	0.45971
MARIADASON_RESPONSE_TO_BUTYRATE_SULINDAC_6	-0.0313055	0.0231063	0.0105808	0.0184947	0.0707796	-0.0542954	0.0798663	0.459211
STARK_HYPPOCAMPUS_22Q11_DELETION_UP	-0.0817232	-0.00664773	0.0610204	-0.11214	0.137279	-0.0710705	0.138193	0.458518
MCBRYAN_PUBERTAL_BREAST_6_7WK_UP	-0.052386	0.0174635	-0.0394876	0.00708316	-0.0454051	-0.00589746	0.0818735	0.458253
MCLACHLAN_DENTAL_CARIES_DN	-0.0437974	0.010814	-0.0492762	0.0300437	-0.0539686	0.0355625	0.150345	0.458041
SMID_BREAST_CANCER_RELAPSE_IN_BONE_DN	0.0512085	-0.0195188	-0.0277056	0.034832	-0.00334467	-0.00953837	0.0645	0.457764
PID_AURORA_A_PATHWAY	0.00440456	0.0124542	-0.061074	0.0488461	0.0223933	0.0134455	0.0220464	0.457651
PID_LYSOPHOSPHOLIPID_PATHWAY	-0.0490279	-0.00270491	-0.0449088	0.0127522	0.00644259	0.00541222	0.0267149	0.457439
MARZEC_IL2_SIGNALING_UP	-0.0400564	-0.0361802	-0.0999078	0.0671511	-0.025712	0.0756908	0.168644	0.457233
RUTELLA_RESPONSE_TO_CSF2RB_AND_IL4_UP	-0.028348	-0.0100076	-0.048302	0.0373175	0.0162789	0.0207341	0.0503206	0.456847
FRIDMAN_IMMORTALIZATION_DN	0.0544146	-0.048572	-0.101207	0.101194	-0.0442169	-0.0212184	0.186385	0.456783
PUJANA_BRCA1_PCC_NETWORK	0.0074028	0.0133993	0.0276646	-0.0113467	0.0468303	-0.0094617	0.0376269	0.456378
AMIT_SERUM_RESPONSE_240_MCF10A	0.0750986	-0.0306325	-0.000603397	-0.0607111	-0.0119103	0.00735254	0.0487554	0.456264
WP_IL4_SIGNALING_PATHWAY	-0.145175	0.0198577	-0.164267	0.113983	0.100648	0.0180432	0.117249	0.455869
LINDGREN_BLADDER_CANCER_HIGH_RECURRENCE	-0.0640061	0.101799	-0.156275	0.0685303	-0.109648	0.0656266	0.153814	0.455382
BIOCARTA_IGF1R_PATHWAY	-0.0160733	0.103752	-0.0967663	0.0810452	0.0248081	0.0291176	0.0444101	0.455038
PASINI_SUZ12_TARGETS_UP	-0.0352541	0.0176288	-0.0828714	0.0528502	-0.0363381	0.0450659	0.0989802	0.45487
PARK_TRETINOIN_RESPONSE_AND_RARA_PLZF_FUSION	-0.0700155	-0.120629	-0.130016	0.142161	0.110713	-0.0347159	0.250566	0.454646
BIOCARTA_RAS_PATHWAY	-0.0271739	0.0536807	-0.0328346	0.00463211	-0.0135944	0.000849026	0.0198668	0.453453
MARTINEZ_RESPONSE_TO_TRABECTEDIN_DN	-0.0401271	-0.00195297	-0.0239627	0.00809683	0.0073528	0.0185704	0.0416008	0.451578
AGUIRRE_PANCREATIC_CANCER_COPY_NUMBER_UP	-0.00165415	0.00853451	0.021764	-0.0245437	0.0715764	-0.0230005	0.0323165	0.450922
FORTSCHEGGER_PHF8_TARGETS_UP	0.048821	0.00490027	-0.00345019	-0.028993	-0.0287532	-0.0102516	0.0338903	0.450883
DIAZ_CHRONIC_MEYLOGENOUS_LEUKEMIA_UP	-0.00055661	-0.000191133	0.0100744	0.0124629	0.0482748	-0.00672121	0.0376312	0.450687
WP_SPINAL_CORD_INJURY	-0.0344484	0.00804763	-0.0782174	0.0618056	0.00776489	0.02951	0.0659601	0.45062
MCCLUNG_CREB1_TARGETS_UP	0.0334728	0.00918555	0.00687262	0.0339123	0.0261343	0.00394849	0.040472	0.450599
REACTOME_TRANSCRIPTIONAL_REGULATION_BY_E2F6	-0.168995	-0.0238469	0.0809615	-0.121219	0.361677	-0.152947	0.262955	0.450547
SWEET_KRAS_ONCOGENIC_SIGNATURE	-0.00380765	-0.0145345	-0.0403481	0.0382718	-0.0025464	0.0221965	0.0621122	0.449416
ONKEN_UVEAL_MELANOMA_DN	-0.0187987	-0.00117737	-0.0177234	0.024605	0.01155	-0.00098538	0.0392364	0.447823
ZWANG_EGF_PERSISTENTLY_UP	0.329229	0.0128107	-0.036947	0.0571459	0.466152	-0.366588	0.171247	0.447779
REACTOME_A_TETRASACCHARIDE_LINKER_SEQUENCE_IS_REQUIRED_FOR_GAG_SYNTHESIS	0.120961	0.0623128	-0.312345	0.288071	-0.0252689	-0.0809557	0.206508	0.4474
MORI_SMALL_PRE_BII_LYMPHOCYTE_UP	0.0169157	-0.020873	-0.0114061	-0.0587078	-0.00923742	0.022359	0.0103935	0.447235
LAU_APOPTOSIS_CDKN2A_UP	-0.0673792	0.0104056	-0.15889	0.0404404	0.0185707	0.0669855	0.0162413	0.446188
BIOCARTA_TCR_PATHWAY	-0.096278	0.0113384	-0.0910719	0.0498404	0.0406608	0.0107405	0.0616269	0.445364
REACTOME_SLC_MEDIATED_TRANSMEMBRANE_TRANSPORT	-0.0372932	-0.0151199	-0.0653986	0.0581293	0.00471505	0.00652892	0.0828923	0.445339
KEGG_TYPE_II_DIABETES_MELLITUS	-0.155179	0.0227024	-0.130638	0.113327	0.140347	-0.0232868	0.130871	0.444601
JAATINEN_HEMATOPOIETIC_STEM_CELL_UP	0.0115042	-0.00437294	0.0139565	0.0116405	0.0190495	0.00135579	0.046211	0.444584
WP_TCELL_ANTIGEN_RECEPTOR_TCR_SIGNALING_PATHWAY	-0.103232	0.00973005	-0.0897648	0.0257475	0.0601418	0.0412938	0.0457484	0.444559
RIGGINS_TAMOXIFEN_RESISTANCE_DN	0.00542197	-0.00899691	-0.0457488	0.0257256	-0.0471669	0.014194	0.0822227	0.444462
CORRE_MULTIPLE_MYELOMA_UP	0.19334	-0.0241585	-0.17709	0.171359	0.0922	-0.0104357	0.10186	0.444458
WP_GLYCOLYSIS_AND_GLUCONEOGENESIS	-0.017986	-0.026414	-0.0309914	0.05201	0.100918	-0.0692669	0.0834127	0.444225
JIANG_AGING_CEREBRAL_CORTEX_UP	-0.0350754	0.0109873	-0.0196796	0.0179007	0.0201831	0.00295137	0.0319334	0.443918
TSENG_ADIPOGENIC_POTENTIAL_UP	0.142995	-0.119763	-0.0936467	0.0056871	0.220586	-0.0455058	0.0383777	0.443799
BURTON_ADIPOGENESIS_PEAK_AT_24HR	0.0910878	0.0441377	0.0660422	0.12585	0.184349	-0.141762	0.271888	0.443489
ONDER_CDH1_TARGETS_2_UP	-0.0407847	0.0226631	-0.144696	0.121438	-0.0791731	0.0539794	0.214086	0.442579
KARLSSON_TGFB1_TARGETS_UP	-0.0114609	-0.0170496	-0.0103675	0.0571491	0.127158	-0.00263508	0.0910378	0.442558
WP_PARKINUBIQUITIN_PROTEASOMAL_SYSTEM_PATHWAY	-0.00719513	-0.0186488	-0.00323706	-0.0593943	0.14073	0.0101797	0.015469	0.442232
GAUSSMANN_MLL_AF4_FUSION_TARGETS_C_UP	0.0452484	-0.00735595	-0.0158569	0.0125351	-0.0316902	-0.0182262	0.0680569	0.4417
REACTOME_SEMA4D_IN_SEMAPHORIN_SIGNALING	-0.0285671	0.0219208	-0.0714166	0.0853057	-0.0159587	-0.0160122	0.114941	0.441455
WP_ONCOSTATIN_M_SIGNALING_PATHWAY	-0.112713	0.00414323	-0.0624393	0.0570944	0.0521605	0.0262167	0.130727	0.440885
CHIANG_LIVER_CANCER_SUBCLASS_PROLIFERATION_DN	0.0267714	0.0408631	-0.0671443	-0.0901122	0.0241892	-0.00255	-0.068764	0.440838
SWEET_KRAS_TARGETS_DN	-0.0287596	-0.00371095	-0.0501461	0.116984	0.0902334	0.0173837	0.1446	0.440522
SHEN_SMARCA2_TARGETS_DN	0.0346502	-0.0170529	-0.144208	0.000682957	0.0899525	0.0118513	-0.0607429	0.439758
WP_OVERVIEW_OF_LEUKOCYTEINTRINSIC_HIPPO_PATHWAY_FUNCTIONS	-0.0156963	-0.0127137	-0.0245244	0.0659906	0.0309752	-0.0231646	0.113835	0.439216
ENK_UV_RESPONSE_KERATINOCYTE_DN	-0.03995	0.00769597	-0.00185219	0.0293645	0.0454778	-0.0265449	0.0792714	0.438606
KEGG_EPITHELIAL_CELL_SIGNALING_IN_HELICOBACTER_PYLORI_INFECTION	-0.0578408	0.00153432	-0.0405268	0.00921551	0.00969727	0.0225632	0.0389171	0.43859
KIM_GLIS2_TARGETS_UP	-0.00806696	0.0474669	-0.132062	0.0832792	-0.0749097	0.0497816	0.113876	0.438462
DACOSTA_UV_RESPONSE_VIA_ERCC3_COMMON_DN	-0.0245912	0.0124568	-0.00157122	0.0302081	-0.0442137	-0.0195808	0.19573	0.437897
TOMLINS_PROSTATE_CANCER_DN	0.00991136	0.00276302	-0.0997675	0.0510482	-0.0536643	0.0204185	0.0625492	0.436543
WP_HEAD_AND_NECK_SQUAMOUS_CELL_CARCINOMA	-0.0179112	0.00363659	-0.0401444	0.0674932	-0.00356543	0.0164346	0.114321	0.435809
HOEBEKE_LYMPHOID_STEM_CELL_DN	-0.0168101	-0.0112025	-0.00755985	0.0347019	0.0360649	-0.0049476	0.0686558	0.435517
CHEN_HOXA5_TARGETS_9HR_UP	-0.0958557	-0.00997155	-0.073103	0.028933	-0.0263089	0.0356411	0.122772	0.434769
PID_IL2_STAT5_PATHWAY	-0.0327195	-0.0765697	-0.226322	0.0842559	0.0515637	-0.0511941	0.00115016	0.43472
NAKAMURA_ADIPOGENESIS_LATE_DN	0.0349028	0.0224021	-0.0519776	0.108332	0.0038871	-0.0498043	0.132998	0.434681
WINTER_HYPOXIA_METAGENE	-0.0303377	0.00379979	-0.0664387	0.093745	0.0163187	-0.0141772	0.115324	0.434556
PID_GLYPICAN_1PATHWAY	0.17316	0.134913	-0.267827	0.236699	-0.152589	-0.14123	0.248822	0.43452
PID_TGFBR_PATHWAY	-0.0228236	0.0253569	-0.0608614	0.101431	0.009508	0.0132093	0.126637	0.433588
CAIRO_LIVER_DEVELOPMENT_UP	-0.0556405	0.0154542	-0.015907	0.0262953	0.017967	0.0227269	0.0855891	0.433409
WP_TCELL_RECEPTOR_AND_COSTIMULATORY_SIGNALING	-0.0294963	-0.000515617	-0.0955147	0.104657	0.000738404	0.0486586	0.136542	0.433266
GOTZMANN_EPITHELIAL_TO_MESENCHYMAL_TRANSITION_UP	0.00147889	0.0429349	-0.0609321	0.0596738	-0.0722498	-0.0193002	0.126825	0.43265
KRIGE_RESPONSE_TO_TOSEDOSTAT_6HR_DN	-0.00813297	0.00412164	-0.000763877	-0.00516509	0.0729956	0.00877074	0.0150783	0.432585
CASORELLI_ACUTE_PROMYELOCYTIC_LEUKEMIA_DN	0.0151438	0.0222769	0.0209365	-0.00534435	0.0643436	-0.0290651	0.0279079	0.43237
LEE_BMP2_TARGETS_DN	0.00586495	0.00692857	0.02825	0.0256107	0.100748	-0.0208234	0.0758246	0.432024
REACTOME_ACTIVATED_NOTCH1_TRANSMITS_SIGNAL_TO_THE_NUCLEUS	-0.0610778	-0.00847114	-0.00210949	-0.0167378	-0.00316876	0.00639365	0.0896073	0.431946
BURTON_ADIPOGENESIS_12	-0.0355702	0.0440982	-0.00629692	0.0139497	-0.0290681	-0.0936429	0.125258	0.431439
RODRIGUES_THYROID_CARCINOMA_ANAPLASTIC_DN	-0.00726015	0.0051817	-0.0684731	0.0289192	-0.0571184	0.00967349	0.0598589	0.431393
BLALOCK_ALZHEIMERS_DISEASE_INCIPIENT_DN	-0.0358281	0.0130309	-0.0173233	0.0056762	0.00188318	-0.000929935	0.0244577	0.429571
SEMENZA_HIF1_TARGETS	-0.0328842	-0.0232497	-0.0869997	0.160806	0.0888962	-0.0348494	0.194294	0.429374
REACTOME_GLYCOLYSIS	-0.0254934	0.00447549	-0.0235718	0.0582234	0.0684092	-0.0344017	0.0714688	0.429188
PID_MYC_ACTIV_PATHWAY	-0.0177533	0.0145125	-0.0222347	0.0578715	0.042823	0.00698121	0.0625085	0.429117
RAGHAVACHARI_PLATELET_SPECIFIC_GENES	0.00204656	0.0528715	-0.0795104	0.0982118	-0.0208056	0.00731696	0.0990387	0.429058
GABRIELY_MIR21_TARGETS	-0.00852961	0.013839	0.00613675	-0.034043	-0.100194	-0.0749972	0.19677	0.428462
KRIGE_AMINO_ACID_DEPRIVATION	-0.0426719	-0.0615139	-0.0948356	0.000643029	-0.0641564	0.0372667	0.0787091	0.427886
OSADA_ASCL1_TARGETS_DN	-0.192452	-0.0138153	-0.0997326	0.0673131	0.118151	0.00817066	0.159736	0.427785
PID_AMB2_NEUTROPHILS_PATHWAY	0.0510889	0.0361965	-0.136677	0.0904208	-0.0387587	0.0741653	0.0754797	0.427778
APRELIKOVA_BRCA1_TARGETS	0.00521695	-0.00682138	-0.0132114	0.0183228	-0.0110307	0.00655266	0.0446968	0.427707
GROSS_HYPOXIA_VIA_ELK3_DN	-0.0660473	-0.0139595	-0.108736	0.1449	0.0065133	0.0387073	0.231067	0.427539
BILD_CTNNB1_ONCOGENIC_SIGNATURE	-0.0460924	0.019367	-0.0423725	0.0602815	-0.0607126	-0.00608089	0.198299	0.427001
CHEN_LVAD_SUPPORT_OF_FAILING_HEART_UP	-0.0801364	-0.0134735	-0.158579	0.103951	0.00133488	0.0325351	0.104055	0.426576
LEE_AGING_NEOCORTEX_UP	-0.0661568	0.0136562	-0.054043	0.0439098	-0.0128056	0.0249584	0.0992217	0.426272
RUTELLA_RESPONSE_TO_HGF_VS_CSF2RB_AND_IL4_UP	0.00330101	0.00352073	-0.073289	0.0475672	-0.017862	0.00967728	0.0349064	0.426094
PEDERSEN_METASTASIS_BY_ERBB2_ISOFORM_7	0.0224515	-0.00695591	-0.0422252	0.0509589	0.0200089	0.00498939	0.0365916	0.426046
SIG_REGULATION_OF_THE_ACTIN_CYTOSKELETON_BY_RHO_GTPASES	0.0137824	0.0225972	0.0069711	0.0220888	-0.00273623	0.00409481	0.0456137	0.425779
RAY_TUMORIGENESIS_BY_ERBB2_CDC25A_UP	-0.00071246	0.0318317	-0.0172487	-0.0492274	-0.0465575	0.0102135	0.0160921	0.425665
MARTINEZ_RB1_TARGETS_UP	-0.0115654	0.00736652	-0.0300359	0.0336663	-0.0166011	-0.00193495	0.0543642	0.425354
PID_ANGIOPOIETIN_RECEPTOR_PATHWAY	-0.0228292	0.038339	-0.115047	0.109884	-0.0248422	-0.00766111	0.102224	0.424879
PAL_PRMT5_TARGETS_UP	-0.0280829	0.0446376	0.0109507	0.00189213	0.094776	0.00150161	0.0329277	0.424809
PID_SYNDECAN_1_PATHWAY	0.0749944	0.00519235	-0.134756	0.0752396	-0.123471	0.0157118	0.143793	0.424727
HILLION_HMGA1B_TARGETS	0.0220901	-0.00102955	-0.0231109	0.0275631	0.0137872	0.0110943	0.0171148	0.424259
NOUZOVA_TRETINOIN_AND_H4_ACETYLATION	0.015712	0.0134516	-0.00132641	0.00856157	0.0120431	-0.0334176	0.0191803	0.424048
GRAHAM_NORMAL_QUIESCENT_VS_NORMAL_DIVIDING_UP	-0.0921202	0.0283436	-0.10646	0.11295	-0.0342871	0.0406802	0.206972	0.423988
PID_TOLL_ENDOGENOUS_PATHWAY	-0.00679963	0.0145462	0.0120914	0.000718463	0.00088636	-0.0142799	0.0422045	0.423411
CHARAFE_BREAST_CANCER_LUMINAL_VS_MESENCHYMAL_DN	-0.00227643	0.0240574	-0.0843793	0.104716	-0.0184307	0.00988769	0.115456	0.422641
IGLESIAS_E2F_TARGETS_UP	-0.0078444	0.0154609	-0.035118	0.0173895	-0.00871408	0.0072046	0.00958431	0.422597
WP_AMINO_ACID_METABOLISM	-0.00311275	-0.0455521	0.0285162	-0.0311705	0.224279	-0.048087	0.0925553	0.422487
IRITANI_MAD1_TARGETS_DN	-0.00181161	0.00252524	0.023203	-0.0166344	0.10202	-0.0125094	0.0390188	0.422166
BURTON_ADIPOGENESIS_PEAK_AT_0HR	0.0230394	0.0152412	-0.0624613	0.0568859	-0.0976251	-0.0515523	0.164411	0.422137
SMIRNOV_CIRCULATING_ENDOTHELIOCYTES_IN_CANCER_UP	-0.0226412	0.000823532	-0.18938	0.144927	-0.0335906	0.0373789	0.130895	0.421691
LEE_NEURAL_CREST_STEM_CELL_DN	0.0105009	-0.00103426	-0.0368813	0.039044	-0.0286363	0.0435071	0.0889326	0.421301
MIKKELSEN_ES_LCP_WITH_H3K4ME3	0.125961	0.0311936	-0.159951	-0.0579078	-0.051851	-0.0038585	-0.0694838	0.421124
REACTOME_TP53_REGULATES_TRANSCRIPTION_OF_CELL_DEATH_GENES	-0.0434673	-0.0497366	-0.137804	0.205595	0.0829653	-0.0146985	0.2436	0.42085
LI_LUNG_CANCER	-0.0133313	-0.00261803	-0.0296795	0.0268862	0.05162	-0.00382539	0.0149002	0.420578
REACTOME_PLASMA_LIPOPROTEIN_CLEARANCE	0.0112952	0.0166239	0.00402553	-0.00517683	-0.028242	-0.0352385	0.0575437	0.420328
SMID_BREAST_CANCER_BASAL_UP	0.0272889	-0.00409858	-0.0330161	0.0475396	-0.0109683	-0.0138175	0.0618588	0.420206
MARTORIATI_MDM4_TARGETS_FETAL_LIVER_UP	-0.0249071	-0.0191013	-0.046928	0.0955549	0.08415	-0.0234576	0.1112	0.419642
YORDY_RECIPROCAL_REGULATION_BY_ETS1_AND_SP100_DN	-0.0989173	-0.0362994	-0.00944559	0.00136107	0.0628474	0.00810954	0.128571	0.419408
REACTOME_GROWTH_HORMONE_RECEPTOR_SIGNALING	-0.342679	0.0703017	-0.157281	0.109068	0.0361973	-0.00263127	0.321274	0.418755
BIOCARTA_FMLP_PATHWAY	-0.115774	0.0226759	-0.0981006	0.0301634	0.0463342	0.0480049	0.0473423	0.418619
HERNANDEZ_ABERRANT_MITOSIS_BY_DOCETACEL_2NM_DN	0.0337685	-0.012144	0.0143121	-0.114381	0.0389555	-0.0177539	0.00187173	0.418401
KIM_LIVER_CANCER_POOR_SURVIVAL_UP	-0.012589	0.0113021	-0.0330888	0.0154331	-0.0419202	0.0230621	0.0640876	0.417642
KEGG_RETINOL_METABOLISM	-0.120678	0.0419935	-0.326789	0.162487	0.278234	-0.136523	-0.0239765	0.417017
GHANDHI_BYSTANDER_IRRADIATION_UP	0.00387178	0.0133168	-0.151971	0.260702	-0.0542591	0.0268857	0.397805	0.416889
REACTOME_GLYCOGEN_METABOLISM	-0.0585126	-0.0124457	-0.0356481	0.0157553	0.0746173	-0.00935285	0.0317828	0.416027
FISCHER_G1_S_CELL_CYCLE	-0.0684636	0.00360797	0.0308553	-0.049153	0.0886169	-0.0324195	0.0750924	0.415617
BIOCARTA_RACCYCD_PATHWAY	-0.0633819	0.0297881	-0.0724058	0.0149734	0.0634703	0.0319871	0.000299218	0.414964
CHESLER_BRAIN_HIGHEST_EXPRESSION	0.00484095	-0.0113223	-0.0120774	0.0388746	0.0320151	-0.00766554	0.0485032	0.41449
WP_AGERAGE_PATHWAY	0.00758496	0.000210385	-0.0614331	0.070078	0.00506003	-0.00262941	0.0570162	0.414212
REACTOME_INTEGRATION_OF_ENERGY_METABOLISM	-0.0187628	0.00757561	-0.0149992	0.0150427	0.0302419	0.00420037	0.0130754	0.413293
KEGG_STARCH_AND_SUCROSE_METABOLISM	-0.177866	0.0473929	-0.163752	0.134594	0.212102	-0.115884	0.0993629	0.413211
SHEDDEN_LUNG_CANCER_GOOD_SURVIVAL_A12	0.0403688	0.0203873	-0.0413853	-0.0160907	-0.0556951	0.00421689	0.0168297	0.412149
PURBEY_TARGETS_OF_CTBP1_AND_SATB1_DN	0.00225365	0.0192967	-0.0553376	-0.046913	-0.0456661	0.0393007	-0.0089705	0.411516
WP_APOPTOSISRELATED_NETWORK_DUE_TO_ALTERED_NOTCH3_IN_OVARIAN_CANCER	-0.0357736	0.023553	-0.0591855	0.075358	0.0058291	-0.0188118	0.0787181	0.410743
MCLACHLAN_DENTAL_CARIES_UP	0.0391142	-0.0131394	-0.125982	0.149369	0.0191103	0.0311068	0.12603	0.410709
MOHANKUMAR_HOXA1_TARGETS_UP	-0.0210979	-0.00900685	0.0189764	-0.0368693	0.0286987	0.00185919	0.0372005	0.410417
KEGG_DRUG_METABOLISM_OTHER_ENZYMES	0.0633142	-0.0991822	-0.00391976	0.0764729	0.476686	-0.131153	0.191897	0.409716
PACHER_TARGETS_OF_IGF1_AND_IGF2_UP	-0.0144898	0.0217401	-0.12236	0.104766	-0.13248	0.0486675	0.243731	0.408817
REACTOME_SIGNALING_BY_EGFR_IN_CANCER	-0.00770432	-0.0370023	-0.0295966	0.0377946	0.0336155	0.0444007	0.0765984	0.408806
PELLICCIOTTA_HDAC_IN_ANTIGEN_PRESENTATION_UP	0.0277046	-0.00867672	0.000510761	0.0146196	0.0660696	0.00522531	0.0217072	0.408656
TURASHVILI_BREAST_LOBULAR_CARCINOMA_VS_DUCTAL_NORMAL_DN	0.221246	0.012633	-0.128976	-0.009629	-0.159832	-0.0796907	0.100883	0.408089
REACTOME_RND2_GTPASE_CYCLE	-0.00799025	0.0692206	-0.0310029	-0.0277232	-0.0470264	-0.00754815	0.0126831	0.407612
ZHOU_INFLAMMATORY_RESPONSE_LIVE_UP	-0.0372004	-0.0249464	-0.0599538	0.0776683	-0.00622089	0.00583697	0.134744	0.407294
LIANG_SILENCED_BY_METHYLATION_2	0.0292537	-0.0267952	-0.308078	0.322809	-0.0835546	0.082427	0.371141	0.407201
WP_NEURAL_CREST_DIFFERENTIATION	-0.1098	-0.0261465	-0.0907985	0.0529192	-0.0375102	0.0144018	0.149534	0.407192
THUM_SYSTOLIC_HEART_FAILURE_UP	0.00498147	-0.00782228	-0.0215336	0.0236396	-0.0170069	-0.00861221	0.0442801	0.407057
MATZUK_CENTRAL_FOR_FEMALE_FERTILITY	0.00866012	-0.0137028	-0.0573562	0.0272299	-0.0171875	0.0343401	0.0331168	0.406529
SAKAI_CHRONIC_HEPATITIS_VS_LIVER_CANCER_DN	-0.0850209	-0.0129691	-0.146674	0.113207	0.0108278	0.0384111	0.116291	0.405606
RUAN_RESPONSE_TO_TNF_TROGLITAZONE_DN	-0.0656594	-0.137319	-0.100438	0.197507	0.156255	-0.071498	0.331469	0.405557
MANNE_COVID19_COMBINED_COHORT_VS_HEALTHY_DONOR_PLATELETS_DN	-0.0442115	0.00854116	-0.0852868	0.0616419	-0.0955844	0.0291121	0.176355	0.404816
INGRAM_SHH_TARGETS_UP	-0.0669344	0.0416025	-0.136186	0.0887933	-0.115565	0.00689228	0.167425	0.404459
SHIN_B_CELL_LYMPHOMA_CLUSTER_3	-0.0463238	0.0356853	-0.162937	0.213683	0.0339061	-0.00202606	0.188751	0.404352
GROSS_ELK3_TARGETS_UP	0.0782651	-0.00293713	-0.0413273	0.0320769	0.00822684	0.0282206	0.0277558	0.4035
BLUM_RESPONSE_TO_SALIRASIB_UP	-0.0359937	-0.0133673	-0.0670289	0.0388852	-0.00485116	0.0251813	0.0453883	0.403068
CHARAFE_BREAST_CANCER_LUMINAL_VS_BASAL_DN	0.0586573	-0.00469913	-0.074697	0.0828365	-0.0323978	-0.0157827	0.0916979	0.402879
DEURIG_T_CELL_PROLYMPHOCYTIC_LEUKEMIA_UP	0.0260841	-0.00439495	-0.0146885	0.00564317	0.0186729	-0.01211	-0.000449559	0.402685
ZHAN_MULTIPLE_MYELOMA_MS_UP	-0.0642517	0.0224887	-0.210501	0.176843	-0.0570948	-0.010841	0.167244	0.402354
ROSS_AML_OF_FAB_M7_TYPE	-0.0604559	0.0367671	-0.0648882	0.131064	0.0233703	-0.0139598	0.171528	0.402343
MIKKELSEN_ES_ICP_WITH_H3K4ME3_AND_H3K27ME3	0.0669159	-0.202315	-0.00403739	-0.0831582	0.170165	-0.0649916	0.126102	0.401175
HAHTOLA_MYCOSIS_FUNGOIDES_CD4_DN	0.0110256	0.0210991	0.0150021	0.0331772	0.0184786	-0.0385303	0.075966	0.400259
NUNODA_RESPONSE_TO_DASATINIB_IMATINIB_UP	-0.140706	0.00221231	-0.124756	0.0550609	0.0215238	0.0846438	0.105639	0.399839
CHUNG_BLISTER_CYTOTOXICITY_DN	0.0502444	-0.0613047	-0.0987256	0.124907	0.0126222	-0.0376832	0.140846	0.399322
GRAESSMANN_RESPONSE_TO_MC_AND_DOXORUBICIN_DN	-0.0140686	-0.000394849	0.0225853	-0.0285982	0.0268474	-0.0197963	0.0355681	0.399049
UEDA_PERIFERAL_CLOCK	-0.025203	0.0135703	-0.0326015	0.0225605	-0.0132333	-0.00328104	0.027998	0.398601
VERRECCHIA_EARLY_RESPONSE_TO_TGFB1	-0.0224336	0.0192916	-0.0950943	0.0808957	-0.0180122	0.0495968	0.0801473	0.39844
PID_CD8_TCR_PATHWAY	0.0749887	0.0324391	-0.096055	-0.010774	-0.0131084	0.0708788	-0.0200984	0.397464
TSENG_ADIPOGENIC_POTENTIAL_DN	-0.0822889	-0.0426059	-0.111175	0.0506008	0.140977	0.0049339	0.0270565	0.396687
BIOCARTA_EDG1_PATHWAY	0.0749455	0.0517805	-0.0714509	-0.00605522	-0.0467607	-0.00264164	-0.00734252	0.395901
BRUINS_UVC_RESPONSE_VIA_TP53_GROUP_D	0.00740286	-0.00565719	-0.0705083	0.0693817	-0.0634931	0.019305	0.129853	0.395563
KEGG_LYSINE_DEGRADATION	-0.0884243	-0.0269223	0.0452265	-0.093754	0.120335	-0.0976923	0.0984828	0.395427
MUNSHI_MULTIPLE_MYELOMA_UP	-0.0517345	0.014414	-0.0770007	0.0375405	0.00913662	0.0242677	0.0225888	0.395254
CHEN_HOXA5_TARGETS_9HR_DN	0.0324165	-0.0031032	0.0172753	-0.150049	0.00980341	0.0124773	0.00903438	0.395075
ROSS_AML_WITH_PML_RARA_FUSION	0.0915382	-0.00307265	-0.0267737	0.0179448	-0.0608334	-0.0178164	0.0943216	0.395063
HESS_TARGETS_OF_HOXA9_AND_MEIS1_DN	-0.0939399	-0.0238976	-0.11879	0.0587329	-0.0377751	0.0444526	0.10853	0.394435
KEGG_TYROSINE_METABOLISM	0.0376762	-1.93524e-05	-0.0137387	-0.0105504	0.107817	-0.00732728	-0.00737668	0.39443
REACTOME_EXTRACELLULAR_MATRIX_ORGANIZATION	0.0735205	0.0216603	-0.136894	0.0938432	-0.0856862	0.0293851	0.0969575	0.394105
WP_MESODERMAL_COMMITMENT_PATHWAY	-0.0621021	0.0166669	-0.051881	0.0699415	-0.0093791	0.0279718	0.125349	0.394022
BROWNE_HCMV_INFECTION_14HR_DN	0.0347793	0.00246299	-0.0218895	0.0417909	-0.013908	0.00341452	0.0574552	0.393688
IWANAGA_E2F1_TARGETS_INDUCED_BY_SERUM	0.0219069	0.064409	0.0873063	-0.00190974	0.0445275	-0.0982605	0.179598	0.393235
BROWN_MYELOID_CELL_DEVELOPMENT_DN	-0.00377263	0.0328995	0.0300176	0.00737313	0.01852	-0.00703836	0.0589148	0.392918
REACTOME_EPHA_MEDIATED_GROWTH_CONE_COLLAPSE	0.0306731	0.0404488	-0.0475726	0.102677	-0.0794015	-0.011857	0.205298	0.392634
DORSEY_GAB2_TARGETS	0.014835	0.0610005	-0.18482	0.081036	-0.128795	0.056856	0.09003	0.392613
MARTINEZ_RESPONSE_TO_TRABECTEDIN_UP	-0.0156568	0.00996365	-0.0119295	0.022265	0.0278243	-0.00759155	0.0189599	0.392096
TURASHVILI_BREAST_DUCTAL_CARCINOMA_VS_LOBULAR_NORMAL_DN	0.000153113	-0.0234482	-0.036981	0.0393	-0.0207266	0.00137012	0.0728773	0.391881
RUTELLA_RESPONSE_TO_CSF2RB_AND_IL4_DN	-0.0316733	0.0113698	-0.0499453	0.0407893	-0.0354373	0.00444014	0.0702447	0.391777
ROESSLER_LIVER_CANCER_METASTASIS_DN	-0.0111262	0.00182788	-0.0301781	0.10575	0.0308345	-0.00228577	0.143918	0.391575
WP_METABOLIC_REPROGRAMMING_IN_COLON_CANCER	-0.00863147	-0.00577945	0.00110003	-0.0160084	0.127487	-0.0446117	0.0191004	0.39137
WP_EGFEGFR_SIGNALING_PATHWAY	-0.0232449	0.00910727	-0.0175918	0.0166647	-0.0224328	0.000120968	0.0516345	0.390935
TURASHVILI_BREAST_NORMAL_DUCTAL_VS_LOBULAR_UP	-0.0320931	-0.033369	-0.0288418	0.0179983	0.013841	0.0105901	0.0485405	0.390437
REACTOME_INTERLEUKIN_4_AND_INTERLEUKIN_13_SIGNALING	-0.0602982	0.0104156	-0.11293	0.150102	-0.00969789	0.0261221	0.187992	0.390046
LI_INDUCED_T_TO_NATURAL_KILLER_UP	0.0165648	-0.0138722	-0.0802074	0.0605793	0.0277042	0.0287743	0.0247788	0.389973
GRAESSMANN_APOPTOSIS_BY_DOXORUBICIN_DN	-0.00870047	0.00898719	0.000171653	0.00770989	-0.0188372	-0.00221654	0.0525419	0.389551
GRADE_COLON_AND_RECTAL_CANCER_DN	-0.0126203	0.0343277	-0.282084	0.0303709	0.0112096	0.0963021	-0.0810182	0.389338
ABRAMSON_INTERACT_WITH_AIRE	-0.0462882	0.0438788	0.0206803	0.0228309	0.0938426	-0.0209339	0.0699399	0.389328
REACTOME_COPI_MEDIATED_ANTEROGRADE_TRANSPORT	0.00607806	0.0193772	-0.0356371	0.0399247	0.0759355	0.01099	0.005528	0.389318
REACTOME_REGULATION_OF_TP53_ACTIVITY_THROUGH_PHOSPHORYLATION	-0.0383116	0.0035214	0.0727674	-0.114303	0.14558	-0.0374157	0.0795541	0.389095
ZIRN_TRETINOIN_RESPONSE_WT1_UP	0.24535	-0.0746695	0.0313698	0.0163751	-0.0738589	-0.0709567	0.325732	0.389003
WONG_MITOCHONDRIA_GENE_MODULE	-0.0550937	0.014602	-0.0377351	-0.00943871	0.102718	0.00732817	-0.0045794	0.388406
MODY_HIPPOCAMPUS_PRENATAL	-0.0173305	0.0109407	0.00357956	0.00607475	0.0486051	-0.0145066	0.0207172	0.388288
KEGG_GLYCOLYSIS_GLUCONEOGENESIS	-0.0271506	0.00786626	-0.0451889	0.0720507	0.0899541	-0.0409642	0.0506495	0.388287
OISHI_CHOLANGIOMA_STEM_CELL_LIKE_DN	-0.0383684	0.008742	-0.149388	0.110092	-0.0283825	0.0412744	0.0894311	0.38788
SERVITJA_LIVER_HNF1A_TARGETS_UP	0.110076	-0.0155644	-0.0426783	0.0102411	-0.00993353	-0.01056	0.0288973	0.387773
LEE_EARLY_T_LYMPHOCYTE_DN	-0.0165739	0.00092499	-0.109469	0.0907261	-0.00969753	0.0150091	0.0636413	0.38661
HAMAI_APOPTOSIS_VIA_TRAIL_UP	0.00593983	0.0102084	-0.0244058	0.0358006	-0.0540053	-0.0156447	0.104344	0.386384
KENNY_CTNNB1_TARGETS_DN	-0.0173871	-0.00304558	-0.0693448	0.0762551	-0.0317463	-0.000236501	0.10076	0.386355
FAELT_B_CLL_WITH_VH_REARRANGEMENTS_UP	0.00436827	0.019645	-0.0845644	0.0568848	-0.0257673	0.0124474	0.0316297	0.385852
BILANGES_SERUM_SENSITIVE_GENES	-0.0305154	-0.00495	-0.00267364	0.0164993	0.00223529	0.0196442	0.0760035	0.38549
REACTOME_COPI_DEPENDENT_GOLGI_TO_ER_RETROGRADE_TRAFFIC	0.007962	0.0408235	-0.0441777	0.0358573	0.0543883	0.0225519	-0.00491468	0.384691
WHITEHURST_PACLITAXEL_SENSITIVITY	-0.0768999	-0.0123686	-0.000375384	-0.0341498	0.182272	-0.00176166	0.0470647	0.384687
SWEET_KRAS_TARGETS_UP	-0.00156935	0.0282034	-0.0796382	0.0789822	-0.0837339	0.00547973	0.135238	0.384378
CHEN_NEUROBLASTOMA_COPY_NUMBER_GAINS	-0.0176569	-0.0112533	0.0510891	0.0504787	0.120711	-0.0721808	0.17723	0.384299
YAMASHITA_METHYLATED_IN_PROSTATE_CANCER	0.0480007	0.0429135	-0.12633	0.129851	-0.0390713	0.0504771	0.103676	0.383471
GENTILE_UV_HIGH_DOSE_DN	-0.0261476	0.0225628	-0.0294625	0.0569612	-0.0171278	-0.00272136	0.0930396	0.383294
SARRIO_EPITHELIAL_MESENCHYMAL_TRANSITION_UP	0.0381338	0.0236369	-0.0141801	-0.0136084	0.0907781	0.0431596	-0.0125468	0.382947
PILON_KLF1_TARGETS_UP	-0.0134241	0.0258872	-0.0373821	0.027076	-0.0878269	-0.0285442	0.120875	0.382885
ZHENG_BOUND_BY_FOXP3	-0.0174673	0.00411078	-0.0540688	0.029577	-0.0972929	0.0246743	0.1421	0.382659
BARIS_THYROID_CANCER_DN	0.0100135	-0.0168703	-0.0354186	0.0544464	0.00749023	0.0226235	0.0649308	0.382214
WP_PRIMARY_FOCAL_SEGMENTAL_GLOMERULOSCLEROSIS_FSGS	-0.00312282	0.0171501	-0.0298005	0.0421263	-0.0232858	-0.00797252	0.0577224	0.381835
REACTOME_DISEASES_OF_PROGRAMMED_CELL_DEATH	-0.0504651	0.0309749	0.0127329	0.0179627	0.0225872	-0.00158392	0.0838618	0.381128
SAKAI_CHRONIC_HEPATITIS_VS_LIVER_CANCER_UP	-0.0170619	-0.00527417	0.00407673	0.0549433	0.018881	0.00121406	0.124579	0.381032
REACTOME_EGFR_DOWNREGULATION	-0.0363181	-0.0619751	-0.0602639	0.0337442	0.0507056	0.0453848	0.0619935	0.380557
NGUYEN_NOTCH1_TARGETS_UP	-0.0882222	0.0246748	-0.0872124	0.00883855	0.0468561	0.0322001	-0.00515899	0.379828
ZWANG_CLASS_3_TRANSIENTLY_INDUCED_BY_EGF	-0.0934085	-0.00948191	-0.156061	0.118631	-0.0646653	0.0792881	0.18795	0.379782
SHEDDEN_LUNG_CANCER_GOOD_SURVIVAL_A4	-0.0803316	-0.0131868	-0.0755318	0.0858036	-0.063927	0.00141309	0.206732	0.379407
REACTOME_MITOCHONDRIAL_CALCIUM_ION_TRANSPORT	-0.00883314	-0.0206509	-0.0244651	-0.052639	0.247302	-0.0653779	-0.00931713	0.378927
LEE_LIVER_CANCER_SURVIVAL_DN	-0.0177312	0.0135847	0.00965929	0.0146522	0.0500432	0.00297146	0.0333542	0.378918
HERNANDEZ_MITOTIC_ARREST_BY_DOCETAXEL_1_UP	-0.0183633	0.0186093	-0.233859	0.117724	-0.0419341	0.058333	0.0382563	0.378257
KEGG_RNA_DEGRADATION	0.0721891	-0.000110005	0.0892425	-0.141972	0.121323	-0.0974806	0.0730657	0.378122
BHATI_G2M_ARREST_BY_2METHOXYESTRADIOL_DN	0.0306906	-0.02069	-0.033442	-0.0146501	-0.0273314	0.00314337	0.00286645	0.377911
REACTOME_PYRUVATE_METABOLISM_AND_CITRIC_ACID_TCA_CYCLE	-0.0474919	-0.0230409	0.015609	-0.0638073	0.189525	-0.0113223	0.0361592	0.377595
WP_ENDODERM_DIFFERENTIATION	-0.0720815	0.0260864	-0.0220062	0.105722	0.0261076	-0.0116708	0.192214	0.377331
ZHOU_TNF_SIGNALING_30MIN	-0.0906747	0.00358162	-0.0501338	0.0116757	0.0278855	0.0248813	0.0407238	0.377042
WANG_SMARCE1_TARGETS_UP	0.0537035	0.00275039	-0.0640855	0.0476015	-0.0663217	0.0101997	0.0791528	0.376787
WAMUNYOKOLI_OVARIAN_CANCER_GRADES_1_2_DN	0.0530726	-0.0197614	-0.104981	0.010026	-0.160069	-0.0164598	0.111203	0.376401
OUELLET_OVARIAN_CANCER_INVASIVE_VS_LMP_UP	-0.00712083	0.0143328	-0.00945462	0.0349227	0.0563655	-0.0123139	0.0255196	0.375919
KEGG_ARACHIDONIC_ACID_METABOLISM	-0.019756	0.0345837	-0.0315408	0.179762	0.0149266	0.0903847	0.296165	0.375871
FIRESTEIN_PROLIFERATION	0.0761485	0.0297586	0.0148584	-0.0364531	-0.0294761	-0.0714766	0.0531243	0.375503
PID_RHOA_REG_PATHWAY	0.062315	-0.0091778	0.046274	-0.0420196	0.0225497	-0.0329704	0.0697101	0.37537
REACTOME_SULFUR_AMINO_ACID_METABOLISM	0.0870652	-0.0485772	0.0758991	-0.0753323	0.192081	-0.00359739	0.0884133	0.374932
BAE_BRCA1_TARGETS_DN	0.00518367	0.0443243	-0.133205	0.0757616	-0.0460865	0.0685798	0.0480339	0.374337
PID_FAK_PATHWAY	0.00163285	0.030744	-0.0555946	0.0510422	-0.0552684	-0.00195553	0.0721282	0.374155
KOKKINAKIS_METHIONINE_DEPRIVATION_48HR_DN	0.0392893	0.00131174	-0.0296846	0.00998856	0.115051	-0.0161679	-0.0120882	0.374044
WP_PATHWAYS_REGULATING_HIPPO_SIGNALING	-0.0165693	-0.00135354	-0.00528034	0.0272625	0.00161092	-0.0160104	0.0602329	0.373534
WP_HUMAN_COMPLEMENT_SYSTEM	0.0657411	-0.0025883	-0.0562617	0.079743	-0.0448914	0.0147964	0.111866	0.372274
POS_HISTAMINE_RESPONSE_NETWORK	-0.0792022	0.00569115	-0.11203	0.110386	0.138905	-0.00425915	0.0544582	0.372087
LI_WILMS_TUMOR	-0.00219959	-0.0581289	-0.0132399	0.0869916	0.238591	0.0347992	0.125755	0.371822
BHATI_G2M_ARREST_BY_2METHOXYESTRADIOL_UP	0.0114918	-0.00095179	-0.00874291	0.0899814	0.0500645	-0.024179	0.112141	0.371716
MARTINEZ_RB1_AND_TP53_TARGETS_UP	0.0049348	0.00336083	-0.0384543	0.0422674	-0.0273102	0.0138603	0.0578341	0.371575
DACOSTA_ERCC3_ALLELE_XPCS_VS_TTD_DN	0.0480824	-0.0325368	-0.00468586	0.0114161	0.142593	-0.00160179	0.0282172	0.371474
PID_BCR_5PATHWAY	-0.114199	0.0228107	-0.0842204	0.0688793	0.0664245	0.0238825	0.0692086	0.371394
WP_RANKLRANK_RECEPTOR_ACTIVATOR_OF_NFKB_LIGAND_SIGNALING_PATHWAY	-0.129819	0.0306018	-0.111394	0.0521913	0.0187086	0.0368641	0.0570871	0.371362
BOYLAN_MULTIPLE_MYELOMA_C_CLUSTER_DN	0.0352193	-0.0451046	-0.102565	0.0463592	-0.15663	0.0412362	0.202019	0.370968
HESS_TARGETS_OF_HOXA9_AND_MEIS1_UP	0.056344	0.051194	0.0462589	0.0523925	0.145799	-0.017433	0.065891	0.370192
REACTOME_SIGNALING_BY_RETINOIC_ACID	0.0980548	0.0484336	0.0242024	-0.229524	0.221716	-0.0728565	-0.0652811	0.369885
KASLER_HDAC7_TARGETS_2_DN	-0.234772	-0.00358376	-0.194622	0.121304	0.0526432	0.0958547	0.16886	0.36963
RHEIN_ALL_GLUCOCORTICOID_THERAPY_DN	-0.0162527	0.0146083	-0.0196976	0.0304097	0.05636	0.00292575	0.0151346	0.369184
PID_ECADHERIN_STABILIZATION_PATHWAY	-0.0364623	-0.0066012	0.0436902	0.0506166	-0.0528519	-0.034231	0.337524	0.368673
REACTOME_NCAM_SIGNALING_FOR_NEURITE_OUT_GROWTH	0.0576253	0.0520241	-0.0437766	-0.147803	-0.191403	-0.00418689	0.0731927	0.368396
WP_EBOLA_VIRUS_PATHWAY_ON_HOST	-0.0116972	0.0182802	-0.00224758	0.0329535	-0.0185251	-0.0133157	0.0841696	0.368375
MCBRYAN_PUBERTAL_BREAST_4_5WK_DN	-0.02557	0.0224799	-0.0143723	0.020652	-0.00900313	0.00719846	0.04056	0.367929
SEITZ_NEOPLASTIC_TRANSFORMATION_BY_8P_DELETION_DN	0.128307	-0.0301859	-0.11783	0.171359	0.0671322	0.013468	0.109396	0.366162
DARWICHE_PAPILLOMA_RISK_LOW_UP	0.00884171	-0.00466425	-0.00882102	0.0428457	0.0339173	-0.0223605	0.0449131	0.365189
NIKOLSKY_BREAST_CANCER_8Q23_Q24_AMPLICON	-0.00441999	-0.0114101	-0.102163	0.0176156	-0.0371175	0.0337648	-0.00203108	0.365131
BURTON_ADIPOGENESIS_4	-0.0355821	-0.0173392	0.00260813	0.0324799	0.0997325	-0.002797	0.0706326	0.364841
WP_B_CELL_RECEPTOR_SIGNALING_PATHWAY	-0.0573341	0.0235329	-0.109508	0.0482833	0.0130149	0.0486192	0.0132044	0.364744
KORKOLA_SEMINOMA_UP	-0.0220079	0.00499515	0.0085905	0.00592481	0.114262	-0.0546662	0.0375279	0.364599
PID_CXCR3_PATHWAY	-0.00585808	0.0329742	-0.0205532	-0.0350392	-0.00206474	0.0356708	-0.00994886	0.363369
HEIDENBLAD_AMPLICON_8Q24_UP	-0.140704	-0.0358657	0.088293	-0.170962	0.183581	-0.0611162	0.137393	0.363205
RASHI_RESPONSE_TO_IONIZING_RADIATION_3	-0.0571058	-0.0275784	0.00792692	-0.0221986	0.0362333	-0.0156835	0.0571262	0.363015
REACTOME_INOSITOL_PHOSPHATE_METABOLISM	-0.0662937	0.00462593	-0.0446045	0.0492591	0.00539253	0.0718754	0.108326	0.362465
ACEVEDO_METHYLATED_IN_LIVER_CANCER_DN	0.0383979	0.00555957	-0.0499494	0.0187249	-0.0117567	0.0162934	0.000743188	0.362343
PID_CD40_PATHWAY	-0.167281	0.0485976	-0.174093	0.0592722	0.0564092	0.116573	0.0473074	0.362185
SCHLOSSER_MYC_TARGETS_AND_SERUM_RESPONSE_DN	-0.0588565	0.0110582	0.03828	-0.0456748	0.118107	-0.00399538	0.0580193	0.361491
BARRIER_CANCER_RELAPSE_NORMAL_SAMPLE_UP	0.00893496	-0.0105437	-0.0388911	0.0353138	-0.0112206	0.0930127	0.0861592	0.361373
BUYTAERT_PHOTODYNAMIC_THERAPY_STRESS_DN	0.0210088	0.0116175	0.0228226	-0.0255275	0.0597931	-0.0232032	0.0120489	0.360949
REACTOME_CELLULAR_RESPONSE_TO_HYPOXIA	-0.0376746	-0.00937824	-0.00724869	0.0123592	0.108281	-0.0116981	0.0335297	0.360294
KEGG_NOD_LIKE_RECEPTOR_SIGNALING_PATHWAY	-0.0927709	0.0539551	-0.147947	0.0485056	-0.0315815	0.0798823	0.0352288	0.360125
RAO_BOUND_BY_SALL4	-0.0205568	-0.0153175	0.0138236	-0.0257832	-0.023404	-0.000203077	0.07327	0.359532
KIM_WT1_TARGETS_DN	-0.02503	-0.00842331	0.00993817	0.00786766	0.0215271	-0.0162327	0.0543512	0.359499
GOBERT_CORE_OLIGODENDROCYTE_DIFFERENTIATION	-0.0247096	-0.445255	-0.0902635	0.229337	0.273434	-0.371806	0.634285	0.359479
MOREAUX_B_LYMPHOCYTE_MATURATION_BY_TACI_DN	0.0291728	-0.0140909	0.0646018	0.00433057	0.176582	-0.0623254	0.105211	0.359282
UDAYAKUMAR_MED1_TARGETS_DN	-0.0897291	0.000643954	-0.0574754	0.0560685	-0.0271499	0.00816661	0.122278	0.35815
MUELLER_COMMON_TARGETS_OF_AML_FUSIONS_DN	-0.0642096	0.00471061	-0.105678	0.111845	-0.171766	0.0483774	0.328388	0.357934
REACTOME_ANTIGEN_ACTIVATES_B_CELL_RECEPTOR_BCR_LEADING_TO_GENERATION_OF_SECOND_MESSENGERS	-0.0282565	-0.0279903	-0.0808297	0.0158304	0.0701977	0.0117288	-0.0212126	0.357788
QI_HYPOXIA	-0.0675326	-0.0760326	-0.0504975	0.199288	0.212595	-0.086107	0.265991	0.357721
MORI_EMU_MYC_LYMPHOMA_BY_ONSET_TIME_UP	-0.0387386	0.0241108	0.054167	-0.0174996	0.187955	-0.0240178	0.07734	0.357054
REACTOME_TRANSPORT_OF_SMALL_MOLECULES	-0.00922528	-0.00850438	-0.0143116	0.0110261	0.0581041	-0.00739665	0.00699444	0.356469
REACTOME_METABOLISM_OF_STEROIDS	0.218192	-0.00953464	-0.00478701	-0.161929	0.148618	-0.0516684	-0.0464078	0.356355
WP_PHOTODYNAMIC_THERAPYINDUCED_NFE2L2_NRF2_SURVIVAL_SIGNALING	-0.135399	0.00462128	-0.0252368	-0.000972393	0.0432421	0.0241292	0.0922522	0.355949
REACTOME_CITRIC_ACID_CYCLE_TCA_CYCLE	-0.149699	-0.0144672	0.00296525	-0.192456	0.257718	0.011447	0.00197487	0.355877
PODAR_RESPONSE_TO_ADAPHOSTIN_UP	-0.123373	0.00762547	-0.119267	0.0350148	-0.0464589	0.0470127	0.0697259	0.355616
BORCZUK_MALIGNANT_MESOTHELIOMA_UP	0.0109952	0.0101532	0.0105686	0.029916	0.0259445	0.0131291	0.0342239	0.35512
SIG_CD40PATHWAYMAP	-0.335431	0.0334247	-0.178869	0.0108541	0.0174841	0.0519575	0.113484	0.354011
BENPORATH_ES_WITH_H3K27ME3	-0.0136924	-0.0543929	-0.0270902	-0.0255829	-0.0271479	0.0319824	0.0469134	0.352436
BURTON_ADIPOGENESIS_PEAK_AT_16HR	0.0142698	-0.0950989	0.0173701	0.0402233	0.160776	0.0523492	0.144607	0.352418
PID_ATR_PATHWAY	-0.0528923	0.0347543	-0.0301995	0.0565968	0.19782	-0.0495786	0.0383188	0.351187
WP_WHITE_FAT_CELL_DIFFERENTIATION	-0.338755	-0.0165849	-0.225659	0.0301148	-0.109109	0.11049	0.212884	0.349724
KONDO_EZH2_TARGETS	0.00547191	0.00255402	-0.0429218	0.0488467	-0.0719016	-0.00835234	0.111813	0.349401
LE_EGR2_TARGETS_UP	-0.0596712	0.0633868	-0.0276065	0.0371391	0.0544128	0.0147267	0.0325126	0.348925
LINDGREN_BLADDER_CANCER_CLUSTER_2B	-0.0275193	0.0325908	-0.114121	0.129708	-0.0413372	0.0122682	0.118554	0.348622
LEE_TARGETS_OF_PTCH1_AND_SUFU_DN	0.0515379	0.129694	0.193669	-0.600311	0.0704722	-0.424728	0.0877385	0.348429
MEISSNER_NPC_HCP_WITH_H3K4ME3_AND_H3K27ME3	0.160502	-0.313737	-0.124114	-0.00364015	-0.0814527	-0.123077	0.235722	0.348269
REACTOME_INTERLEUKIN_17_SIGNALING	-0.0556562	-0.022607	-0.00571938	-0.0297853	0.0324407	0.0240169	0.032518	0.348138
DEMAGALHAES_AGING_UP	0.015132	-0.0156909	-0.111955	0.0918303	-0.0239781	0.0343813	0.0643152	0.348068
DAZARD_RESPONSE_TO_UV_SCC_UP	-0.024613	0.00481644	-0.042613	0.0642103	0.0141407	0.011647	0.0585341	0.34766
NAKAMURA_ADIPOGENESIS_EARLY_DN	-0.029649	0.0865542	-0.0818885	0.136903	-0.0072115	-0.0271241	0.11293	0.347537
BENPORATH_EED_TARGETS	-0.0556791	-0.0233376	-0.0280871	0.0127631	-0.00532379	0.0123943	0.0587082	0.347354
DORSAM_HOXA9_TARGETS_DN	-0.0719025	-0.00670272	-0.0292161	0.0420827	0.0125189	0.00665985	0.0895443	0.347323
REACTOME_RHOC_GTPASE_CYCLE	0.0361603	0.0217152	-0.0127727	0.0266594	-0.0874548	-0.0248192	0.130665	0.34718
REACTOME_FOXO_MEDIATED_TRANSCRIPTION_OF_OXIDATIVE_STRESS_METABOLIC_AND_NEURONAL_GENES	-0.338435	-0.0499228	0.0188527	0.0977858	-0.000356884	-0.0535125	0.612882	0.346835
WP_CANCER_IMMUNOTHERAPY_BY_PD1_BLOCKADE	-0.206943	-0.0211377	-0.0551246	0.0647186	0.141396	-0.0179061	0.158499	0.346731
KIM_WT1_TARGETS_12HR_DN	-0.0238113	0.0101287	-0.0384358	0.0945757	0.00659673	-0.0211438	0.112928	0.346318
OUILLETTE_CLL_13Q14_DELETION_UP	-0.0738565	-0.0179376	0.0133968	0.00399516	0.0343808	-0.0562652	0.104452	0.34593
ZHENG_GLIOBLASTOMA_PLASTICITY_DN	-0.081286	0.0527015	-0.223723	0.0659135	-0.110176	0.071614	0.0340709	0.345771
CHIARADONNA_NEOPLASTIC_TRANSFORMATION_KRAS_CDC25_DN	-0.0584594	0.0343579	-0.219663	0.258589	-0.0862767	0.0576904	0.270453	0.345686
REACTOME_CELLULAR_RESPONSES_TO_EXTERNAL_STIMULI	-0.0139047	-0.00533936	-0.00703375	0.00634371	0.0215774	0.00184793	0.00958128	0.345674
WIERENGA_STAT5A_TARGETS_GROUP1	-0.0290541	-0.0465811	-0.0367896	0.0274475	-0.0598138	0.0713679	0.167432	0.344957
REACTOME_DISEASES_ASSOCIATED_WITH_GLYCOSAMINOGLYCAN_METABOLISM	0.130427	0.0453848	-0.306471	0.333233	-0.0653368	-0.0263504	0.198204	0.344692
WEST_ADRENOCORTICAL_TUMOR_UP	0.0492532	-0.00307796	0.0320003	-0.049223	0.0871902	-0.0187349	0.0134435	0.343665
BERENJENO_TRANSFORMED_BY_RHOA_FOREVER_DN	0.0908089	0.000829527	-0.146076	0.183607	-0.024287	0.0809941	0.14842	0.343366
LAIHO_COLORECTAL_CANCER_SERRATED_DN	-0.0398224	-0.0362935	0.0265565	-0.0455037	0.0556935	-0.00556301	0.0573318	0.343328
PID_IL6_7_PATHWAY	-0.067528	0.00684497	-0.12078	0.100082	0.0336974	0.0270174	0.0515133	0.343031
CHICAS_RB1_TARGETS_LOW_SERUM	-0.0408953	0.0229714	-0.0200914	0.0195738	0.0830527	0.00524072	0.0122743	0.342747
KEGG_GALACTOSE_METABOLISM	-0.156504	-0.038846	-0.182292	0.186071	0.351963	-0.169957	0.0905811	0.342724
REACTOME_RRNA_PROCESSING	-0.00221821	0.00148636	0.00441267	-0.00676339	0.0172916	0.00126248	0.0030205	0.341518
PID_FRA_PATHWAY	0.0137946	-0.00199309	-0.101957	0.107849	0.00559983	0.0575815	0.0714007	0.340898
REACTOME_MITOCHONDRIAL_TRANSLATION	0.0178648	0.00824046	-0.0342184	-0.138838	0.233837	0.0531635	-0.0747172	0.34071
NUYTTEN_NIPP1_TARGETS_DN	0.0371385	-0.00221218	-0.0112979	0.00365477	-0.0143518	-0.00572652	0.0157553	0.340041
MARTORIATI_MDM4_TARGETS_FETAL_LIVER_DN	-0.0065761	0.0173869	-0.0328305	0.0308002	-0.0895057	-0.00253244	0.12006	0.339706
STEIN_ESRRA_TARGETS_RESPONSIVE_TO_ESTROGEN_DN	0.0121777	0.0363138	0.112885	0.0210177	0.144035	0.0270912	0.156623	0.339671
XU_HGF_SIGNALING_NOT_VIA_AKT1_48HR_UP	0.0557106	-0.0801192	-0.164082	0.0899629	0.106164	0.0748285	0.00877299	0.338865
SANA_TNF_SIGNALING_UP	-0.0722429	0.017937	-0.0922711	0.068929	-0.0649614	0.0461343	0.114889	0.338579
WP_DEVELOPMENT_OF_URETERIC_COLLECTION_SYSTEM	-0.0250028	-0.028852	-0.020828	0.0279929	-0.0162898	0.0235363	0.0880568	0.338153
WP_GENES_CONTROLLING_NEPHROGENESIS	0.0525533	-0.0148853	-0.0194463	0.0470701	-0.0416033	-0.0451582	0.103084	0.337406
PICCALUGA_ANGIOIMMUNOBLASTIC_LYMPHOMA_UP	0.00175456	0.0642232	-0.17443	0.14553	-0.225033	0.00584378	0.24447	0.335643
RAMALHO_STEMNESS_UP	-0.00290687	-0.0137021	0.0252194	-0.00367199	0.0551246	-0.0192142	0.04445	0.333852
MAYBURD_RESPONSE_TO_L663536_DN	-0.0197058	0.00614894	-0.00612704	0.0244222	0.0948639	-0.024282	0.0227312	0.333837
HOQUE_METHYLATED_IN_CANCER	-0.186836	0.0124097	-0.0505056	0.0415896	-0.00679951	0.0619374	0.193288	0.333758
WP_MAMMALIAN_DISORDER_OF_SEXUAL_DEVELOPMENT	-0.130739	-0.110657	-0.0434756	0.0607211	0.0748418	0.0827069	0.224386	0.333744
KRIGE_RESPONSE_TO_TOSEDOSTAT_24HR_UP	-0.0253125	-0.00055375	-0.0619615	0.041068	-0.0681641	0.0157032	0.0817104	0.333613
BROWNE_HCMV_INFECTION_4HR_DN	-0.0582421	0.00503746	-0.0378333	0.0526966	-0.0129325	0.024135	0.0951666	0.333284
BARIS_THYROID_CANCER_UP	-0.0734496	0.00294724	-0.0370341	0.0212881	0.117227	0.0133578	0.0211443	0.333063
BUYTAERT_PHOTODYNAMIC_THERAPY_STRESS_UP	-0.0935607	0.00427139	-0.0743616	0.0238067	-0.0469584	0.012025	0.0586994	0.331468
BIOCARTA_PTDINS_PATHWAY	-0.0340878	0.00671517	-0.0680258	0.0101483	0.0613779	-0.00730962	-0.0345067	0.33143
KEGG_CHEMOKINE_SIGNALING_PATHWAY	-0.00983111	0.0434457	-0.0527966	0.0574246	-0.0727255	0.00728261	0.0941936	0.330752
PID_HES_HEY_PATHWAY	-0.158952	-0.0101935	-0.04888	0.118804	0.0841537	-0.00799734	0.201302	0.32975
VANASSE_BCL2_TARGETS_UP	0.0533425	0.0137212	-0.0725289	0.0298765	0.00949365	0.0565173	-0.00687922	0.329521
WIERENGA_STAT5A_TARGETS_UP	-0.0573692	-0.0144258	-0.0723408	0.00180467	-0.10646	0.0636621	0.111657	0.329384
REACTOME_INFLAMMASOMES	-0.0291698	0.024847	-0.0830435	0.085797	-0.0323781	0.00852197	0.0719255	0.328812
PARK_APL_PATHOGENESIS_DN	-0.0300611	-0.0023641	-0.0469352	0.0386742	-0.023418	0.0319201	0.0568304	0.328381
REACTOME_GLUCOSE_METABOLISM	-0.024589	-0.00617763	-0.0133246	0.0467163	0.0757486	-0.0490492	0.0480635	0.327306
IGARASHI_ATF4_TARGETS_DN	-0.0597	0.0241132	-0.0358266	-0.0233238	-0.0137512	-0.0256612	-0.0143415	0.327281
KEGG_CITRATE_CYCLE_TCA_CYCLE	-0.0982032	-0.00655844	0.0169854	-0.147316	0.369734	-0.0680027	-0.0123498	0.326972
REACTOME_FLT3_SIGNALING_IN_DISEASE	-0.0321106	0.0198074	-0.0302514	0.0407472	-0.0271823	-0.0102386	0.0620684	0.326551
ODONNELL_METASTASIS_UP	-0.155078	0.105182	-0.18598	0.092024	0.0291924	0.251871	0.108667	0.326267
ZHAN_MULTIPLE_MYELOMA_DN	0.0415374	0.15262	-0.200948	0.223197	-0.37041	-0.0898397	0.428166	0.324397
CARD_MIR302A_TARGETS	-0.0828229	0.0234436	-0.0224909	0.0760828	-0.0200159	-0.00496377	0.163994	0.324385
REACTOME_CREB1_PHOSPHORYLATION_THROUGH_NMDA_RECEPTOR_MEDIATED_ACTIVATION_OF_RAS_SIGNALING	0.111306	0.0581266	-0.0438884	-0.0102403	-0.0918579	0.0283967	0.0456133	0.323257
LIAN_NEUTROPHIL_GRANULE_CONSTITUENTS	0.146605	0.0222831	-0.145649	0.102955	-0.282495	-0.0374011	0.267483	0.32321
WP_SPHINGOLIPID_METABOLISM_GENERAL_OVERVIEW	0.247497	-0.151363	-0.0228212	-0.171775	0.00629893	0.0350171	0.0495718	0.323181
REACTOME_DEADENYLATION_DEPENDENT_MRNA_DECAY	0.0547604	0.00453226	0.0460464	-0.108645	0.0519966	-0.0474937	0.0109294	0.321491
REACTOME_RNA_POLYMERASE_II_TRANSCRIPTION_TERMINATION	-0.0200767	0.0107319	0.0019444	0.0478298	0.131845	-0.0189435	0.0467321	0.32141
DURAND_STROMA_S_UP	0.0056821	-0.0715692	-0.0241516	-0.0284002	-0.0693661	0.012355	0.0893114	0.320833
LINDVALL_IMMORTALIZED_BY_TERT_DN	-0.0318274	0.0141484	-0.0357284	0.0980339	-0.0586196	-0.0044004	0.185902	0.32082
OSWALD_HEMATOPOIETIC_STEM_CELL_IN_COLLAGEN_GEL_UP	-0.141742	0.00507001	-0.090189	0.0439092	-0.00837782	0.0333215	0.0798764	0.320628
PURBEY_TARGETS_OF_CTBP1_NOT_SATB1_DN	-0.0177394	0.0139648	-0.040675	-0.0147882	-0.0318287	0.0119433	-0.0115764	0.320342
JIANG_AGING_CEREBRAL_CORTEX_DN	0.00166405	0.00628238	-0.0266964	0.00715489	-0.0330864	0.0191706	0.0222805	0.320054
BHATTACHARYA_EMBRYONIC_STEM_CELL	-0.0044482	0.00195906	0.0177901	0.0593428	0.0846931	-0.00725545	0.078531	0.318779
WP_IL3_SIGNALING_PATHWAY	-0.074612	0.0567086	-0.0488488	0.0730013	0.0323053	0.0293746	0.0662052	0.318052
KONG_E2F3_TARGETS	0.140174	0.131597	0.106423	-0.00961149	0.256684	-0.135975	0.0650002	0.317662
WP_OXIDATIVE_DAMAGE	0.0193689	-0.0438366	0.010493	-0.0506367	0.105198	-0.0675799	0.00482844	0.317312
VANTVEER_BREAST_CANCER_BRCA1_UP	-0.0087039	-0.0205358	0.0422478	-0.099453	-0.0526478	0.0166842	0.103087	0.317239
MCCLUNG_DELTA_FOSB_TARGETS_8WK	-0.0172332	0.00830365	0.0268743	0.0113598	0.0159418	0.0102731	0.0713659	0.317141
REACTOME_ASSEMBLY_OF_COLLAGEN_FIBRILS_AND_OTHER_MULTIMERIC_STRUCTURES	0.165842	-0.00581968	-0.176477	0.0178428	-0.20175	0.0420883	0.070985	0.316661
CROONQUIST_STROMAL_STIMULATION_UP	-0.108215	0.0207008	-0.0828067	0.0537465	-0.0562838	0.0230001	0.100777	0.316647
KYNG_ENVIRONMENTAL_STRESS_RESPONSE_NOT_BY_GAMMA_IN_WS	-0.0603069	-0.0179647	-0.0870486	0.0587403	0.107111	-0.0209111	0.00214334	0.31567
PEPPER_CHRONIC_LYMPHOCYTIC_LEUKEMIA_UP	0.101976	0.00747922	-0.141195	0.14088	-0.165541	-0.0308327	0.185255	0.315227
YAGI_AML_RELAPSE_PROGNOSIS	-0.0268236	0.0230798	-0.0524101	0.0538848	0.0591932	0.0193092	0.00942721	0.314675
BIOCARTA_BCR_PATHWAY	-0.0893686	0.0263945	-0.0461412	0.0371543	0.0162327	4.92014e-06	0.0458996	0.314595
NIKOLSKY_BREAST_CANCER_1Q21_AMPLICON	0.247965	0.0785369	-0.199384	-0.039007	0.0926	0.00487182	-0.16277	0.313978
WP_PHOTODYNAMIC_THERAPYINDUCED_NFKB_SURVIVAL_SIGNALING	-0.135138	0.0656379	-0.225974	0.262964	-0.0493113	0.101008	0.242994	0.313855
BROWNE_HCMV_INFECTION_4HR_UP	-0.139683	-0.0102887	0.00254767	0.253767	0.0598851	-0.12928	0.480017	0.313053
TIAN_TNF_SIGNALING_NOT_VIA_NFKB	-0.140463	1.65861e-05	-0.0848882	0.0329565	0.030645	0.0551574	0.0588667	0.312898
VANDESLUIS_COMMD1_TARGETS_GROUP_3_DN	-0.527133	0.1903	-0.568283	0.355441	-0.431076	0.0615824	0.499362	0.312859
KATSANOU_ELAVL1_TARGETS_DN	-0.0131793	-0.0319703	-0.0268819	-0.0311219	-0.0429449	0.0450168	0.0381528	0.312207
SENESE_HDAC3_TARGETS_UP	0.000189997	0.00886922	-0.0292626	0.033192	-0.0693956	0.013307	0.0944695	0.311919
GARGALOVIC_RESPONSE_TO_OXIDIZED_PHOSPHOLIPIDS_MAGENTA_UP	-0.0930736	0.0314274	-0.0816193	0.0705808	-0.0631485	0.0548194	0.127016	0.311504
WEIGEL_OXIDATIVE_STRESS_RESPONSE	-0.0861424	0.00340931	-0.0344877	0.0603034	0.0555545	-0.000805368	0.0758166	0.311194
YAO_TEMPORAL_RESPONSE_TO_PROGESTERONE_CLUSTER_14	2.46345e-05	0.0182023	0.0314453	0.0101866	0.0890829	0.0181755	0.0368325	0.310984
BROWNE_HCMV_INFECTION_14HR_UP	-0.0695328	0.00298093	-0.00104088	0.0123898	0.0426567	-0.00751111	0.054821	0.309713
GENTILE_UV_RESPONSE_CLUSTER_D2	-0.0684011	0.0408349	-0.178482	0.139034	-0.112838	0.0280541	0.125775	0.30951
BRUINS_UVC_RESPONSE_EARLY_LATE	-0.0179031	-0.00273645	0.0156976	0.0315079	0.016441	-0.0375358	0.0852606	0.309397
KYNG_RESPONSE_TO_H2O2	-0.0342249	0.0227874	-0.0482502	0.0724855	-0.00124639	0.0132553	0.0634217	0.308811
FIGUEROA_AML_METHYLATION_CLUSTER_3_UP	-0.00162735	-0.0186852	0.0169612	-0.0137601	-0.00937671	-0.0352087	0.0535738	0.308446
NABA_CORE_MATRISOME	0.182876	0.0676435	-0.236341	0.145394	-0.254928	0.045218	0.162635	0.308426
STARK_PREFRONTAL_CORTEX_22Q11_DELETION_DN	0.00399797	-0.00258546	-0.0140248	0.0134838	0.0721795	-0.00111679	-0.00195466	0.308095
WP_SPHINGOLIPID_METABOLISM_INTEGRATED_PATHWAY	0.240003	-0.153385	-0.0210406	-0.181556	-0.00119418	0.0342945	0.0397909	0.307628
MCBRYAN_PUBERTAL_TGFB1_TARGETS_DN	0.0116782	-0.0905434	-0.0522081	0.150846	0.0113379	0.0264006	0.234861	0.307408
WP_SYNAPTIC_SIGNALING_PATHWAYS_ASSOCIATED_WITH_AUTISM_SPECTRUM_DISORDER	0.0343312	0.0333376	0.0337132	-0.0224861	-0.0376749	-0.0380882	0.0732154	0.307301
KAYO_CALORIE_RESTRICTION_MUSCLE_UP	0.0332262	0.0425864	-0.119339	0.0833266	-0.0340029	0.0383781	0.0183984	0.306723
KEGG_GLUTATHIONE_METABOLISM	-0.0970631	-0.0290026	0.0177272	-0.0210059	0.169167	0.00156014	0.0672731	0.30624
WP_ANGIOPOIETIN_LIKE_PROTEIN_8_REGULATORY_PATHWAY	-0.00651251	0.00292971	-0.0311912	-0.0236164	-0.0347395	-0.00471605	-0.0170851	0.305947
TCGA_GLIOBLASTOMA_COPY_NUMBER_DN	0.0382657	-0.00262443	-0.0555479	0.189516	0.00980113	-0.0684131	0.201479	0.305361
SIG_PIP3_SIGNALING_IN_B_LYMPHOCYTES	-0.033767	-0.0387247	-0.0169112	-0.237416	0.0549258	0.0284661	-0.0683227	0.305176
REACTOME_TGF_BETA_RECEPTOR_SIGNALING_ACTIVATES_SMADS	-0.0730217	0.020535	-0.0506196	0.0462956	0.0260309	0.0141756	0.0373133	0.304857
BURTON_ADIPOGENESIS_5	0.00511773	-0.00466466	-0.0114198	0.0131502	0.16263	-0.0192113	0.000540793	0.304076
BROWN_MYELOID_CELL_DEVELOPMENT_UP	0.016615	-0.032643	-0.0206329	0.020634	0.0128767	-0.0116442	0.0211575	0.303847
WP_ENDOCHONDRAL_OSSIFICATION	0.066993	0.0242759	-0.148294	0.171835	-0.0479813	0.0365868	0.106694	0.30364
WP_ENDOCHONDRAL_OSSIFICATION_WITH_SKELETAL_DYSPLASIAS	0.066993	0.0242759	-0.148294	0.171835	-0.0479813	0.0365868	0.106694	0.30364
HAN_JNK_SINGALING_DN	-0.0232834	-0.0312234	-0.0351176	0.087163	-0.0363815	-0.00870957	0.159643	0.303404
MCBRYAN_PUBERTAL_TGFB1_TARGETS_UP	-0.000350875	0.0177436	-0.078387	0.0588882	-0.0200704	0.0472219	0.0292061	0.302972
HALMOS_CEBPA_TARGETS_UP	-0.0920331	0.0316734	-0.23871	0.255736	-0.0597473	0.0745275	0.199869	0.302834
REACTOME_NEDDYLATION	-0.0467992	0.00415953	-0.0095178	0.0245434	0.129274	0.00203244	0.0267635	0.302633
ZHAN_MULTIPLE_MYELOMA_CD1_AND_CD2_DN	-0.0237048	0.017651	-0.0583897	0.115549	-0.0163554	0.0353789	0.126184	0.301862
TURASHVILI_BREAST_LOBULAR_CARCINOMA_VS_LOBULAR_NORMAL_DN	0.0818198	0.0157465	-0.0668937	0.0921727	-0.114191	-0.0401354	0.143191	0.300253
REACTOME_TRANSCRIPTIONAL_REGULATION_BY_VENTX	-0.0730634	0.00932809	-0.0853268	0.0721303	-0.0141634	0.0437912	0.068889	0.300216
ZHU_CMV_ALL_UP	-0.0907424	0.0284282	-0.0581109	0.0537744	0.031499	0.0120116	0.0437573	0.300099
ZHU_CMV_24_HR_UP	-0.0708832	0.0189322	-0.0433626	0.0396842	0.0468723	0.010836	0.026662	0.299268
REACTOME_DEPOSITION_OF_NEW_CENPA_CONTAINING_NUCLEOSOMES_AT_THE_CENTROMERE	-0.00694465	0.030411	0.020811	0.0259339	0.119395	-0.0703963	0.0383591	0.298294
KIM_WT1_TARGETS_12HR_UP	-0.0209192	-0.00814287	-0.0858982	0.0492171	-0.0257864	0.0601182	0.0375202	0.298066
DAZARD_RESPONSE_TO_UV_NHEK_DN	-0.0720945	0.0281423	-0.0487421	0.0648794	-0.077336	-0.101626	0.133816	0.298004
YAO_TEMPORAL_RESPONSE_TO_PROGESTERONE_CLUSTER_2	-0.015785	0.012869	-0.0480284	0.0865505	-0.0247713	-0.0513648	0.0901542	0.297677
VECCHI_GASTRIC_CANCER_ADVANCED_VS_EARLY_UP	0.0969657	0.0183364	-0.116949	0.145067	-0.201897	-0.00482543	0.246518	0.297036
REACTOME_RHOBTB_GTPASE_CYCLE	-0.0391754	0.00401203	0.00433968	0.0501066	0.0052143	-0.0102401	0.106961	0.29698
WP_VEGFAVEGFR2_SIGNALING_PATHWAY	-0.0230482	0.0050029	-0.0268782	0.0408627	-0.00570171	0.00579015	0.0434758	0.296923
WP_TCELL_ANTIGEN_RECEPTOR_TCR_PATHWAY_DURING_STAPHYLOCOCCUS_AUREUS_INFECTION	-0.109362	0.0027318	-0.0879784	0.0448176	0.0393229	0.063053	0.038657	0.296592
HU_GENOTOXIC_DAMAGE_24HR	-0.0505776	-0.0106965	-0.0138085	0.0166641	0.0113065	2.23681e-05	0.0442134	0.295503
MITSIADES_RESPONSE_TO_APLIDIN_UP	-0.11055	0.0111443	-0.11407	0.049036	-0.0528305	0.0436493	0.0584774	0.295402
CHNG_MULTIPLE_MYELOMA_HYPERPLOID_UP	-0.00481659	-0.00609206	0.00882357	-0.00685009	0.0127733	-0.00219523	0.0133258	0.295144
BURTON_ADIPOGENESIS_3	0.129648	0.0964919	-0.0350794	0.0222387	0.229549	0.0653674	-0.0550639	0.294927
REACTOME_PI3K_AKT_SIGNALING_IN_CANCER	-0.0860509	-0.00229503	-0.144103	0.0740887	0.0438344	0.0791275	0.0126349	0.294922
GROSS_HYPOXIA_VIA_ELK3_AND_HIF1A_UP	-0.0793961	-0.0237837	-0.105943	0.177149	0.0567695	0.0398036	0.159164	0.294876
NAKAYAMA_SOFT_TISSUE_TUMORS_PCA2_UP	0.112149	0.0396553	0.0229979	0.0771101	0.0976709	-0.0462874	0.0596132	0.294325
WP_TGFBETA_RECEPTOR_SIGNALING	-0.0673089	0.00220775	-0.171436	0.175885	-0.100204	0.0750498	0.19185	0.293774
SENESE_HDAC3_TARGETS_DN	0.0603178	-0.00444973	-0.0289145	0.00439993	-0.00664851	-0.0343695	-0.00329584	0.29364
GROSS_HYPOXIA_VIA_HIF1A_DN	-0.0841864	-0.0193753	-0.128846	0.187779	0.0364569	0.0885425	0.174086	0.293411
LEE_AGING_MUSCLE_UP	-0.0594638	0.00893527	-0.0283021	0.0213911	0.0186229	0.020326	0.0307821	0.293352
SCHLINGEMANN_SKIN_CARCINOGENESIS_TPA_DN	-0.0611694	0.0318008	-0.0181479	0.0506752	0.0275281	-0.0577151	0.0613046	0.293309
KRIEG_HYPOXIA_NOT_VIA_KDM3A	-0.0250117	0.00486272	-0.0500632	0.0714668	-0.0198351	-0.00601571	0.0692207	0.292602
REACTOME_ANTIMICROBIAL_PEPTIDES	0.14	-0.0341889	-0.144828	0.0525503	-0.264251	-0.018073	0.184833	0.292424
TONKS_TARGETS_OF_RUNX1_RUNX1T1_FUSION_MONOCYTE_UP	0.00665032	0.00149133	0.0141217	0.0463477	0.0554464	-0.0277641	0.0580957	0.291271
ZHOU_INFLAMMATORY_RESPONSE_LIVE_DN	0.0522655	-0.0684272	-0.0166631	0.00786177	0.0898142	-0.0567374	0.0191404	0.290947
LINDGREN_BLADDER_CANCER_WITH_LOH_IN_CHR9Q	0.0181549	-0.0141434	0.0257969	-0.0355303	0.0249095	-0.012998	0.0208509	0.290633
ROSS_AML_WITH_MLL_FUSIONS	0.00143277	-0.00282655	0.006326	0.00508245	0.0202972	-0.0130305	0.0133451	0.289748
MARTIN_INTERACT_WITH_HDAC	-0.144663	-0.0200962	-0.0153588	-0.0155476	0.0900955	-0.00112396	0.0602843	0.289738
REACTOME_COMPLEMENT_CASCADE	0.0217005	-0.0187191	-0.489027	0.0999814	-0.278343	0.0713188	-0.0548306	0.289719
BENPORATH_ES_CORE_NINE_CORRELATED	-0.110906	-0.0323034	-0.01434	0.004652	0.0663615	0.0177044	0.0729945	0.289162
SHEPARD_BMYB_MORPHOLINO_DN	0.0441466	0.00188115	-0.0236262	-0.0306718	-0.0237015	0.0139187	-0.0117462	0.288684
REACTOME_MITOCHONDRIAL_PROTEIN_IMPORT	-0.00155335	0.00490874	0.0203792	-0.0641219	0.0689054	-0.0112484	-0.0103771	0.28833
HOSHIDA_LIVER_CANCER_SUBCLASS_S2	-0.0221199	0.00536131	0.000748525	0.0355469	-0.0201857	-0.00805726	0.087756	0.287746
KEGG_PROPANOATE_METABOLISM	-0.00689815	0.015547	-0.0302994	0.00390092	0.116647	-0.0440735	-0.0303847	0.287567
BIOCARTA_BAD_PATHWAY	-0.100872	0.0908658	-0.0769615	0.116446	0.00318174	0.0470277	0.108156	0.287455
DOANE_BREAST_CANCER_CLASSES_DN	0.0428161	-0.00951305	-0.0688339	0.103387	0.00926707	0.00763767	0.0594197	0.287028
REACTOME_TRANSCRIPTIONAL_REGULATION_BY_THE_AP_2_TFAP2_FAMILY_OF_TRANSCRIPTION_FACTORS	-0.058329	-0.00589036	-0.0512203	0.0552198	-0.0511117	0.006878	0.0995048	0.286801
COATES_MACROPHAGE_M1_VS_M2_DN	-0.0376883	-0.0706316	-0.0299014	0.0773529	0.05982	0.00369026	0.113865	0.286605
PID_RXR_VDR_PATHWAY	-0.763945	0.116651	-1.15012	0.642302	0.240556	0.518585	0.11471	0.286214
WP_MIRNA_TARGETS_IN_ECM_AND_MEMBRANE_RECEPTORS	-0.0264811	0.134664	-0.300496	0.174009	-0.401029	-0.0600005	0.237804	0.285327
PID_ERA_GENOMIC_PATHWAY	-0.0479403	0.00890248	-0.0301559	0.0109507	0.00111753	0.0232402	0.0181428	0.285185
MUELLER_METHYLATED_IN_GLIOBLASTOMA	0.181262	-0.0804724	-0.15203	0.0108628	-0.0916067	0.0482019	0.0169057	0.284745
WP_STEROL_REGULATORY_ELEMENTBINDING_PROTEINS_SREBP_SIGNALLING	0.185332	0.0493011	-0.0715736	0.011282	0.224766	-0.0650341	-0.0895012	0.284566
REACTOME_BIOLOGICAL_OXIDATIONS	-0.0345607	-0.00950614	-0.0713913	0.0100285	0.0607688	0.0372758	-0.0287997	0.284552
REACTOME_METABOLISM_OF_AMINO_ACIDS_AND_DERIVATIVES	-0.00697533	-0.0034951	0.00573844	-0.00533386	0.0404286	-0.000340982	0.00613853	0.284187
VERHAAK_AML_WITH_NPM1_MUTATED_UP	-0.0797623	0.0243771	-0.0967529	0.0827013	-0.0458937	0.071669	0.0960582	0.282648
PID_NFKAPPAB_CANONICAL_PATHWAY	-0.181852	0.0371147	-0.257895	0.189843	0.0535524	0.123694	0.0748112	0.282397
CROONQUIST_NRAS_VS_STROMAL_STIMULATION_UP	0.313935	-0.224008	0.126945	-0.361491	-0.0353687	0.0146985	0.200918	0.282213
ROPERO_HDAC2_TARGETS	0.0442958	0.0477866	-0.161875	0.161927	-0.115642	0.0225013	0.117114	0.282146
CAFFAREL_RESPONSE_TO_THC_UP	-0.073375	-0.0096426	-0.00791703	-0.0336081	-0.0830812	0.00494936	0.102679	0.281913
REACTOME_SIGNALING_BY_ERBB4	0.00359886	0.0330558	-0.0293775	0.0452641	-0.0688331	0.00186742	0.0844008	0.281784
PETROVA_PROX1_TARGETS_UP	0.158702	0.0220563	0.0500273	-0.0580318	0.365421	-0.126016	-0.0232164	0.2817
ZHU_CMV_8_HR_UP	-0.165311	0.0101995	-0.137901	0.149736	0.0209064	0.103157	0.156091	0.281155
REACTOME_REGULATION_OF_TP53_EXPRESSION_AND_DEGRADATION	-0.121619	-0.0185834	-0.0151014	0.00320403	0.0403862	0.0237747	0.0807328	0.28103
REACTOME_INTERLEUKIN_6_FAMILY_SIGNALING	-0.31885	0.0988216	-0.176245	0.406435	0.110286	-0.0923641	0.413507	0.280313
GEORGES_TARGETS_OF_MIR192_AND_MIR215	0.0205751	0.0150413	0.0109908	-0.0392546	-0.051955	-0.0123947	0.0374362	0.27966
IVANOVSKA_MIR106B_TARGETS	-0.0494322	0.024463	0.0113006	-0.0553801	0.0249044	-0.0381961	-0.00178109	0.279154
DIRMEIER_LMP1_RESPONSE_LATE_UP	-0.069414	-0.0038063	-0.0094969	0.0246802	0.0643724	-0.0355749	0.0431569	0.278737
MELLMAN_TUT1_TARGETS_DN	-0.0679424	0.00934358	-0.0224293	0.0361103	-0.00407202	-0.0204727	0.0634475	0.277366
SANA_RESPONSE_TO_IFNG_DN	0.0108542	0.014892	-0.0248702	0.0184703	0.0398513	0.00366278	-0.0141891	0.27719
MANALO_HYPOXIA_UP	-0.0176341	0.0384949	-0.0924547	0.0969803	-0.150248	-0.0137517	0.157962	0.277155
IKEDA_MIR30_TARGETS_UP	-0.0169887	0.0210887	-0.0700314	0.11216	-0.10114	-0.0063588	0.163861	0.276608
CUI_TCF21_TARGETS_2_DN	0.0114803	-0.0161502	-0.0522766	0.0402408	-0.10375	-0.0284719	0.0987766	0.275304
KIM_ALL_DISORDERS_DURATION_CORR_DN	-0.0274056	0.00515243	0.0104525	-0.0134644	0.0364804	-0.00804969	0.0119455	0.274514
WP_GENOTOXICITY_PATHWAY	0.0889462	-0.0392642	-0.125091	-0.163724	-0.149072	0.0189223	-0.0795222	0.274508
KAN_RESPONSE_TO_ARSENIC_TRIOXIDE	-0.000867983	-0.0180709	-0.0745256	0.114145	0.049587	-0.0188918	0.0546945	0.273989
KEGG_GLYCOSAMINOGLYCAN_BIOSYNTHESIS_HEPARAN_SULFATE	0.0701955	0.0682807	-0.792568	0.826919	-0.555775	-0.11251	0.634534	0.273837
REACTOME_EPHB_MEDIATED_FORWARD_SIGNALING	0.0216435	0.0190701	0.00349469	0.0166276	-0.0207075	-0.0161133	0.0379085	0.273259
PATIL_LIVER_CANCER	0.0334754	0.00901552	-0.0093924	0.0211864	-0.000573596	0.00364456	0.0129134	0.272901
GRADE_COLON_VS_RECTAL_CANCER_UP	0.0162892	-0.0425826	-0.0276861	-0.00770484	-0.0153787	0.0455483	0.0275112	0.272715
BOYLAN_MULTIPLE_MYELOMA_D_UP	0.0104219	-0.02473	-0.00559035	0.0321828	0.0510768	-0.0449891	0.0328495	0.272558
MCMURRAY_TP53_HRAS_COOPERATION_RESPONSE_UP	0.0836835	-0.0347084	-0.167839	0.209431	0.00793538	0.0531294	0.108513	0.272369
KORKOLA_TERATOMA	-0.0749071	0.0142555	-0.0577343	0.0255863	-0.0120967	-0.00929307	0.0152876	0.272236
HOFMANN_CELL_LYMPHOMA_UP	0.0123893	0.0185279	-0.0605013	-0.00430005	-0.0354829	0.0375472	-0.016454	0.272032
NADERI_BREAST_CANCER_PROGNOSIS_UP	0.260614	-0.115065	0.290796	-0.369858	0.298852	-0.341406	0.194969	0.271781
BROWNE_HCMV_INFECTION_8HR_UP	-0.136954	0.0103106	-0.00770085	0.0394072	0.0444537	-0.0332872	0.111484	0.271459
LEE_CALORIE_RESTRICTION_NEOCORTEX_UP	-0.048166	0.0294113	-0.0612947	0.0357829	0.0361722	0.0440378	-0.000478667	0.271427
NEMETH_INFLAMMATORY_RESPONSE_LPS_UP	-0.0875507	-0.0352243	-0.0826577	0.134136	0.0191374	0.0390828	0.148422	0.269986
FERNANDEZ_BOUND_BY_MYC	-0.0157507	0.00734499	-0.0139565	0.00647992	-0.00315855	0.0001811	0.00248848	0.269928
WP_LUNG_FIBROSIS	0.057894	-0.0071171	-0.243074	0.302538	-0.0376299	0.0660593	0.173455	0.269772
CHICAS_RB1_TARGETS_SENESCENT	-0.017407	0.0119233	-0.00688386	0.0437258	0.0340668	0.00833057	0.0368297	0.269546
GHANDHI_DIRECT_IRRADIATION_UP	0.0553267	-0.0962576	-0.0948385	0.16156	-0.0854668	0.0247882	0.23768	0.26945
WP_APOPTOSIS_MODULATION_AND_SIGNALING	-0.0658942	-0.00793846	-0.024717	0.0158458	0.0760133	0.00132851	0.0156085	0.269361
SCHLESINGER_METHYLATED_DE_NOVO_IN_CANCER	-0.0495707	-0.0687446	-0.0748889	0.103898	0.0451939	0.0260098	0.100309	0.268464
RAMASWAMY_METASTASIS_DN	-0.0281359	0.036494	-0.113325	0.0890789	0.00722166	0.046621	0.0124193	0.268409
TURASHVILI_BREAST_LOBULAR_CARCINOMA_VS_DUCTAL_NORMAL_UP	0.0406732	0.0969478	-0.117383	0.121255	-0.192045	-0.0548746	0.153753	0.268337
REACTOME_LAMININ_INTERACTIONS	0.153571	0.0420385	-0.108609	0.0607159	-0.193741	0.0183023	0.118318	0.268079
WP_ATM_SIGNALING_NETWORK_IN_DEVELOPMENT_AND_DISEASE	-0.015648	0.0204951	0.0302173	-0.0157034	-0.0464607	-0.0485226	0.0912528	0.267972
REACTOME_DARPP_32_EVENTS	-0.0672721	0.0244347	-0.0507786	0.0790381	0.0650192	-0.0186038	0.039664	0.267877
GRUETZMANN_PANCREATIC_CANCER_UP	0.0173512	0.0147515	-0.0437358	0.0482261	-0.0212253	0.00994629	0.0256882	0.267873
KYNG_DNA_DAMAGE_BY_UV	-0.0147604	-0.0208878	-0.0692961	0.124392	-0.0500028	-0.0202459	0.146075	0.26786
REACTOME_SYNTHESIS_OF_VERY_LONG_CHAIN_FATTY_ACYL_COAS	0.223107	-0.031069	-0.0155839	-0.0622462	0.0421652	-0.12384	-0.0128091	0.267135
JI_METASTASIS_REPRESSED_BY_STK11	0.0165781	-0.172308	-0.274668	0.192729	0.196919	0.171767	0.0427215	0.267087
TARTE_PLASMA_CELL_VS_PLASMABLAST_UP	-0.0416938	0.01156	-0.0534132	0.0375849	-0.0248092	0.0244829	0.032721	0.266799
CHEBOTAEV_GR_TARGETS_UP	-0.0798894	-0.0398193	0.0880166	-0.361015	0.0516864	0.0764513	0.0355503	0.266142
BIOCARTA_NFKB_PATHWAY	-0.289354	0.0435569	-0.338027	0.165195	-0.0435168	0.0933804	0.0524905	0.265846
WP_TYROBP_CAUSAL_NETWORK	0.007881	-0.0283834	-0.0538817	0.00275667	-0.0371673	0.0104786	-0.00112489	0.265673
JINESH_BLEBBISHIELD_TO_IMMUNE_CELL_FUSION_PBSHMS_UP	0.0207376	0.00316929	-0.0360916	0.026509	-0.0508665	0.0120887	0.0390949	0.264875
JIANG_TIP30_TARGETS_UP	-0.0204444	-0.006719	-0.0498891	0.0827609	-0.00311822	0.028642	0.0761201	0.264863
PEREZ_TP63_TARGETS	-0.0546029	-0.0174823	-0.106819	0.024796	-0.0798286	0.0473983	0.0318869	0.263378
BHAT_ESR1_TARGETS_NOT_VIA_AKT1_UP	-0.0783889	-0.0185381	-0.020722	0.0628004	0.0755884	-0.00329646	0.0783133	0.262677
MISSIAGLIA_REGULATED_BY_METHYLATION_UP	-0.000112862	-0.00857284	-0.0848772	0.0765536	-0.0340629	0.0423581	0.0521131	0.26263
LIANG_HEMATOPOIESIS_STEM_CELL_NUMBER_LARGE_VS_TINY_UP	-0.00923887	0.0186483	-0.00579943	0.0450204	0.0468435	0.00664232	0.027083	0.262494
HELLEBREKERS_SILENCED_DURING_TUMOR_ANGIOGENESIS	-0.00278138	0.00637234	-0.111688	0.0994568	-0.114677	0.00950831	0.105408	0.262464
BIOCARTA_G2_PATHWAY	-0.0329079	-0.00345324	-0.00967734	-0.0908355	-0.0777243	0.024013	0.0248229	0.260984
WEST_ADRENOCORTICAL_TUMOR_DN	-0.070955	0.0102732	-0.0526519	0.0530716	-0.0155185	0.0301698	0.0629929	0.259795
KEGG_COLORECTAL_CANCER	-0.0683636	0.0171422	-0.0185163	0.032165	0.0318845	0.0101007	0.0421053	0.259775
REACTOME_NUCLEOBASE_CATABOLISM	0.198933	-0.138939	-0.132067	-0.0424401	0.247047	-0.012479	-0.114304	0.258872
SANSOM_APC_TARGETS_DN	-0.0227471	-0.0413708	-0.0435848	-0.0385826	0.0041646	0.0622181	-0.00707313	0.258522
REACTOME_RHOBTB1_GTPASE_CYCLE	-0.0454766	0.00548864	0.0130036	0.0468261	0.000376191	-0.0179412	0.111587	0.258364
ZHAN_V2_LATE_DIFFERENTIATION_GENES	-0.036523	0.00371016	-0.0364773	0.0343818	-0.0193016	-0.000702134	0.0339093	0.257932
ULE_SPLICING_VIA_NOVA2	-0.00640681	0.0413122	-0.0365183	0.0479967	-0.180489	-0.0581031	0.186605	0.257091
SMITH_TERT_TARGETS_DN	0.0365182	-0.0149475	0.0100601	-0.047068	-0.0401724	0.0324985	0.0404429	0.255579
REACTOME_METAL_ION_SLC_TRANSPORTERS	-0.189785	0.252786	-0.783153	0.674042	-0.650907	0.121994	0.537986	0.255274
PARENT_MTOR_SIGNALING_DN	0.0140654	-0.0189651	-0.0226082	0.0342578	-0.0706913	-0.00904845	0.0945779	0.25527
KEGG_RIG_I_LIKE_RECEPTOR_SIGNALING_PATHWAY	-0.19174	-0.0119563	0.0205721	-0.0581142	0.00152082	-0.0027123	0.133422	0.25511
CHANG_IMMORTALIZED_BY_HPV31_UP	-0.00954371	0.0672854	-0.146219	0.143419	-0.169779	0.0121949	0.14668	0.253973
SESTO_RESPONSE_TO_UV_C0	-0.0638238	0.00907569	-0.0417041	0.013011	0.00848947	0.0285948	0.0118528	0.253475
ONDER_CDH1_SIGNALING_VIA_CTNNB1	0.0545109	0.00467149	-0.12455	0.0712526	-0.17066	0.0300286	0.102134	0.253307
PID_TELOMERASE_PATHWAY	-0.0653267	0.0050299	-0.0224622	0.0303484	0.0505133	0.0278564	0.0345961	0.252989
JINESH_BLEBBISHIELD_TRANSFORMED_STEM_CELL_SPHERES_UP	-0.0180646	-0.00779981	-0.0430578	0.0194618	-0.0746137	0.0204853	0.0621241	0.251788
WANG_ESOPHAGUS_CANCER_VS_NORMAL_UP	-0.00472125	0.0251564	-0.0951145	0.0764425	-0.0346108	0.0610161	0.0347565	0.251609
BROWNE_HCMV_INFECTION_16HR_DN	0.0195626	-0.00819328	-0.0677929	0.0940512	-0.0254132	-0.00576761	0.0636074	0.250743
SANSOM_APC_TARGETS	0.0130677	-0.0490433	0.00751443	0.000243424	0.044624	-0.0200765	0.0326629	0.250734
WP_FOLATE_METABOLISM	-0.067013	0.0114817	-0.0243842	0.113936	0.00296621	-0.0134583	0.149517	0.250277
ZHOU_INFLAMMATORY_RESPONSE_FIMA_UP	-0.0392153	-0.00900297	-0.0498907	0.0659043	0.000137614	0.0260872	0.057966	0.250119
REACTOME_PROCESSING_OF_CAPPED_INTRONLESS_PRE_MRNA	-0.00906324	0.00172655	0.0248845	0.0415986	0.156026	-0.0310772	0.0465652	0.249447
REACTOME_ECM_PROTEOGLYCANS	0.108275	0.069272	-0.154955	0.114806	-0.272774	-0.0118842	0.171614	0.24937
WP_SPLICING_FACTOR_NOVA_REGULATED_SYNAPTIC_PROTEINS	0.070099	0.00551364	-0.0486573	-0.0207937	-0.211707	0.0228697	0.140148	0.249274
QI_HYPOXIA_TARGETS_OF_HIF1A_AND_FOXA2	-0.118791	-0.0100415	0.0126954	-0.00168688	0.0495448	0.029937	0.0960045	0.249125
REACTOME_CHROMOSOME_MAINTENANCE	0.0204652	0.0504912	0.0513255	0.026293	0.141672	-0.0204128	0.0379676	0.248848
VANTVEER_BREAST_CANCER_POOR_PROGNOSIS	0.129209	0.0565181	0.0107573	0.0175043	0.0493161	-0.0856752	0.0105829	0.248452
MARKEY_RB1_CHRONIC_LOF_DN	-0.00560173	-0.00794503	-0.072142	0.0647942	-0.0912207	0.00767842	0.0873289	0.248224
PHONG_TNF_RESPONSE_VIA_P38_COMPLETE	-0.0393737	0.0108741	-0.0683998	0.0515812	-0.024884	0.0489212	0.0378246	0.247823
GAZDA_DIAMOND_BLACKFAN_ANEMIA_ERYTHROID_DN	-0.00366465	-0.00822089	0.0117585	0.00112004	-0.0134678	-0.0307398	0.0446243	0.246816
RIZ_ERYTHROID_DIFFERENTIATION_12HR	-0.110415	0.0274932	-0.0860328	0.0155034	0.0135612	0.0448598	-0.00542819	0.246651
REACTOME_NOTCH3_ACTIVATION_AND_TRANSMISSION_OF_SIGNAL_TO_THE_NUCLEUS	-0.0357372	-0.00929059	-0.00350735	-0.00359832	0.00514876	0.000932212	0.0203413	0.2464
HU_GENOTOXIN_ACTION_DIRECT_VS_INDIRECT_4HR	-0.0892854	0.0289703	-0.0127028	0.0255189	0.0209396	-0.00660344	0.0524972	0.246116
LIU_PROSTATE_CANCER_DN	0.0407491	0.00667812	-0.0850577	0.0526992	-0.0760073	0.0149497	0.0320044	0.245682
HUANG_GATA2_TARGETS_DN	-0.0508594	0.0116634	-0.0657139	0.0395077	0.0433169	0.0345117	-0.00527894	0.245379
CHANGOLKAR_H2AFY_TARGETS_DN	0.0368665	-0.0334825	0.0845187	-0.0496308	0.17034	-0.101256	0.062479	0.245303
SMID_BREAST_CANCER_LUMINAL_A_UP	-0.127943	-0.0565105	-0.201076	0.134511	0.0347131	0.0899675	0.0500203	0.245266
WP_TNF_ALPHA_SIGNALING_PATHWAY	-0.0781788	0.0254267	-0.0336616	0.00896108	0.00268518	0.0105334	0.0165136	0.244359
BROWNE_HCMV_INFECTION_8HR_DN	-0.0602333	0.0578162	-0.118466	0.0587493	-0.270832	0.0278253	0.201812	0.244154
REACTOME_DEREGULATED_CDK5_TRIGGERS_MULTIPLE_NEURODEGENERATIVE_PATHWAYS_IN_ALZHEIMER_S_DISEASE_MODELS	-0.0327864	0.00388939	-0.0046378	0.0412977	-0.0268981	0.00202285	0.090217	0.243692
DURCHDEWALD_SKIN_CARCINOGENESIS_DN	0.0188088	-0.0113598	-0.0702152	0.0980023	-0.0965767	0.0181881	0.13152	0.242747
REACTOME_RND3_GTPASE_CYCLE	0.0503322	0.050516	-0.060298	0.0461222	-0.159984	-0.0279123	0.106927	0.242355
KEGG_GNRH_SIGNALING_PATHWAY	0.011511	-6.35431e-06	-0.0180848	-0.0159098	-0.0186197	0.0327543	4.22111e-05	0.241254
DACOSTA_UV_RESPONSE_VIA_ERCC3_TTD_UP	-0.0733076	0.0116765	-0.0180435	0.0356205	0.0599933	-0.020493	0.0327997	0.24104
VALK_AML_CLUSTER_4	-0.0717185	0.0131279	-0.0598578	0.0527493	-0.12875	0.0672648	0.160705	0.24016
REACTOME_POST_TRANSLATIONAL_PROTEIN_MODIFICATION	-0.00975276	0.00727373	-0.0138026	0.0304031	0.0117602	0.000593935	0.0172681	0.240125
NUYTTEN_EZH2_TARGETS_UP	-0.017084	-0.00951659	-0.0571047	0.0551726	-0.0461213	0.0137378	0.0555365	0.239937
REACTOME_TOLL_LIKE_RECEPTOR_CASCADES	-0.0606964	-0.0126345	-0.0322117	0.0218417	0.00419317	0.036066	0.0407361	0.239935
DEURIG_T_CELL_PROLYMPHOCYTIC_LEUKEMIA_DN	-0.0119376	-0.0256804	-0.00754149	0.0457793	0.00571942	-0.021154	0.0681514	0.239376
KRIGE_RESPONSE_TO_TOSEDOSTAT_24HR_DN	-0.00910392	0.00846329	0.0131536	-0.00496676	0.0561811	-0.00032547	0.00599243	0.239126
DUTTA_APOPTOSIS_VIA_NFKB	-0.142146	0.0668011	-0.121127	0.139851	-0.0104494	0.0323905	0.0978866	0.238904
REACTOME_PEPTIDE_HORMONE_METABOLISM	0.0428904	0.0395674	-0.0791468	0.00367897	-0.141861	0.06495	0.0529145	0.238538
WP_IL2_SIGNALING_PATHWAY	-0.125285	0.00837683	-0.0346918	0.0235109	0.0332457	0.0388798	0.0582646	0.237434
WELCSH_BRCA1_TARGETS_DN	-0.0438006	0.015587	-0.00779821	0.0628616	0.0394133	0.00844178	0.0650678	0.236588
WP_COPPER_HOMEOSTASIS	0.0154165	-0.0109053	0.00925888	0.00685321	0.0146369	-0.0212464	0.0214054	0.236502
WP_PROLACTIN_SIGNALING_PATHWAY	-0.0719626	0.012437	-0.0448955	0.0523014	0.00711259	0.00288235	0.0427268	0.236257
KORKOLA_EMBRYONAL_CARCINOMA_UP	-0.0253783	-0.00379553	0.012126	0.00807879	0.0982153	-0.0352942	0.0181481	0.236193
SCHAEFFER_PROSTATE_DEVELOPMENT_AND_CANCER_BOX4_DN	-0.00577376	0.0321979	-0.00912751	0.015792	-0.00564294	-0.00707835	0.00922505	0.236189
WP_RAC1PAK1P38MMP2_PATHWAY	-0.0148397	0.0226995	-0.0489365	0.0870713	-0.0430899	-0.00427351	0.0821866	0.235103
WP_INITIATION_OF_TRANSCRIPTION_AND_TRANSLATION_ELONGATION_AT_THE_HIV1_LTR	-0.0837949	-0.00959842	-0.130289	0.0795107	-0.0215618	0.0984968	0.047892	0.234675
KIM_WT1_TARGETS_UP	-0.0764902	0.00502858	-0.0998215	0.107407	-0.0102079	0.0603965	0.0776233	0.234612
ANDERSEN_LIVER_CANCER_KRT19_DN	-0.0520812	-0.0226748	-0.0327492	0.0614489	0.132212	-0.0188713	0.0273915	0.233818
WP_KISSPEPTINKISSPEPTIN_RECEPTOR_SYSTEM_IN_THE_OVARY	0.107376	0.0166143	-0.115092	0.0613371	-0.0389068	0.0502607	-0.00988751	0.233724
REACTOME_SYNTHESIS_OF_SUBSTRATES_IN_N_GLYCAN_BIOSYTHESIS	0.136049	-0.0367879	-0.180827	-0.372062	0.208997	0.0863692	-0.343603	0.232206
WEINMANN_ADAPTATION_TO_HYPOXIA_DN	0.0093656	-0.0165321	-0.0332683	0.148985	-0.0679088	-0.0249775	0.212996	0.231824
SASSON_RESPONSE_TO_GONADOTROPHINS_UP	-0.0683502	0.00527859	-0.0581186	0.0417261	0.0413999	0.0158406	0.00593065	0.230981
FISCHER_G2_M_CELL_CYCLE	-0.0180062	0.0275445	-0.0337262	0.0704909	0.00189763	0.00878593	0.0459831	0.230813
RICKMAN_TUMOR_DIFFERENTIATED_WELL_VS_MODERATELY_DN	0.252117	-0.155317	0.000544253	-0.109932	0.0100715	-0.0436358	0.0404949	0.230769
REACTOME_SIGNALING_BY_INTERLEUKINS	-0.0322122	-0.00349708	-0.0300485	0.0470986	0.0367614	0.0179936	0.0264054	0.229939
ENK_UV_RESPONSE_EPIDERMIS_UP	0.027871	-0.00721819	-0.00998412	0.0224547	0.0526326	-0.009529	-0.000751171	0.229577
SABATES_COLORECTAL_ADENOMA_DN	-0.0683465	0.0260529	-0.226685	0.103823	-0.190821	0.0328008	0.0534385	0.228951
CAIRO_HEPATOBLASTOMA_DN	0.0225567	0.0130523	-0.153309	0.145836	-0.0761967	0.0119325	0.0613304	0.228605
UEDA_CENTRAL_CLOCK	-0.0943906	0.0100629	-0.05013	0.0128858	-0.00256565	0.0501393	0.0295255	0.228412
REACTOME_SIGNALING_BY_NOTCH1	-0.0654134	-0.0146405	-0.0335459	0.00603921	-0.0538766	0.0356754	0.0657935	0.228188
NABA_ECM_GLYCOPROTEINS	0.172127	0.0412163	-0.254215	0.178132	-0.243077	0.0485667	0.103933	0.228131
JOSEPH_RESPONSE_TO_SODIUM_BUTYRATE_DN	0.0240994	0.0334522	-0.0733842	0.0614477	0.00712729	0.0196347	-0.0112576	0.227219
WAKABAYASHI_ADIPOGENESIS_PPARG_BOUND_8D	-0.0229617	0.00699259	-0.0114361	0.0247106	-0.0117256	-0.0132433	0.0324171	0.226879
SESTO_RESPONSE_TO_UV_C8	0.0643759	-0.00516246	-0.0134631	0.0246219	-0.119531	-0.0219953	0.120349	0.226741
DARWICHE_SQUAMOUS_CELL_CARCINOMA_UP	-0.0126161	6.47787e-06	-0.0307424	0.0661034	0.0266523	-0.009483	0.0359854	0.226719
WP_TRANSLATION_INHIBITORS_IN_CHRONICALLY_ACTIVATED_PDGFRA_CELLS	-0.0286896	0.00127566	-0.0409442	0.032041	-0.0202275	0.0229881	0.0262095	0.226527
WP_HEART_DEVELOPMENT	-0.0205833	0.0146718	-0.0551429	0.290209	-0.0636788	0.00772613	0.355521	0.225155
ZHOU_INFLAMMATORY_RESPONSE_LPS_UP	-0.0671783	-0.0247892	-0.0529122	0.0880921	-0.0381076	0.00364957	0.119103	0.225152
PID_IL2_1PATHWAY	-0.0642724	-0.0206431	-0.0328584	0.039144	-0.0177015	0.0444819	0.0797074	0.225018
GERHOLD_ADIPOGENESIS_UP	-0.0144976	0.00173596	-0.0372988	0.0671192	0.0173291	-0.0108413	0.034306	0.224842
STARK_PREFRONTAL_CORTEX_22Q11_DELETION_UP	0.00626058	0.0230158	-0.0362732	0.0709478	-0.11189	-0.0206693	0.129928	0.224624
REACTOME_G_ALPHA_12_13_SIGNALLING_EVENTS	-0.0134715	0.0235576	-0.0382447	0.0911201	-0.056813	-0.00910545	0.107341	0.224418
BRUECKNER_TARGETS_OF_MIRLET7A3_UP	0.0286699	-0.0344582	-0.0709436	0.0270446	-0.0402639	0.0458249	0.0167807	0.224258
LEIN_CEREBELLUM_MARKERS	0.00586691	0.0393603	-0.0220703	-0.0238311	-0.13455	0.047715	0.0864117	0.224032
SCHUHMACHER_MYC_TARGETS_UP	-0.00675294	-0.0152416	0.0534861	0.00416019	0.21303	-0.0128578	0.044629	0.222766
GROSS_HYPOXIA_VIA_ELK3_UP	0.0263821	0.0205562	0.0103416	0.0221419	0.039495	-0.0295865	0.0125255	0.222711
ROSTY_CERVICAL_CANCER_PROLIFERATION_CLUSTER	0.210247	0.146872	0.058871	0.0299221	0.226958	0.0162772	-0.0174945	0.221933
WP_SARSCOV2_INNATE_IMMUNITY_EVASION_AND_CELLSPECIFIC_IMMUNE_RESPONSE	-0.0862502	0.00408476	-0.0621788	0.071862	-0.0518412	0.0440452	0.103608	0.220969
NAKAYAMA_FRA2_TARGETS	-0.0470904	-0.0481142	-0.117215	0.141748	-0.00847144	0.0599071	0.10436	0.220848
WP_WNTBETACATENIN_SIGNALING_PATHWAY_IN_LEUKEMIA	-0.0537261	0.00566611	-0.0377746	0.00636803	-0.100422	0.0317618	0.0846373	0.220585
PASINI_SUZ12_TARGETS_DN	0.000647612	0.018738	-0.0547429	0.0688308	-0.0475241	0.0182978	0.0543028	0.22054
PID_IL1_PATHWAY	-0.0855804	-0.00367918	-0.0791143	0.0500864	0.0165867	0.0313085	0.0166323	0.219739
CASORELLI_APL_SECONDARY_VS_DE_NOVO_UP	-0.0806384	-0.00469416	-0.134855	0.084331	-0.0516455	0.057255	0.0413985	0.219607
PLASARI_TGFB1_TARGETS_1HR_UP	-0.0928371	0.0337358	-0.22216	0.224752	-0.0437134	0.133006	0.115705	0.219573
REACTOME_SMAD2_SMAD3_SMAD4_HETEROTRIMER_REGULATES_TRANSCRIPTION	-0.0547415	-0.0174418	-0.0465998	0.0310694	-0.0232748	0.0502857	0.0514539	0.21892
WANG_ESOPHAGUS_CANCER_VS_NORMAL_DN	0.00336565	0.00406277	-0.0562131	0.0732336	0.000354418	0.0207385	0.0295751	0.21862
REACTOME_RESPONSE_TO_ELEVATED_PLATELET_CYTOSOLIC_CA2	0.0528302	0.00930276	-0.0655054	0.0502558	-0.0542679	0.0249314	0.0254256	0.21857
BLANCO_MELO_COVID19_SARS_COV_2_INFECTION_A594_ACE2_EXPRESSING_CELLS_UP	-0.17391	0.0133579	-0.122717	0.0997993	-0.0668806	0.0604461	0.120026	0.218522
DAVICIONI_MOLECULAR_ARMS_VS_ERMS_DN	0.0320824	0.0176343	-0.0740285	0.0677222	-0.0487149	0.0181203	0.0280067	0.218135
PARK_TRETINOIN_RESPONSE_AND_PML_RARA_FUSION	-0.104115	-0.0175271	-0.0898951	0.157215	0.0123121	0.03993	0.142858	0.217929
ZHAN_MULTIPLE_MYELOMA_CD2_UP	-0.0741704	0.11106	-0.181359	0.0754969	-0.210268	0.0594978	0.068024	0.217435
HSIAO_LIVER_SPECIFIC_GENES	0.0651382	0.0061551	-0.0394519	0.0652621	-0.0660884	-0.0252957	0.0696323	0.217269
REACTOME_ATF4_ACTIVATES_GENES_IN_RESPONSE_TO_ENDOPLASMIC_RETICULUM_STRESS	-0.0797725	-0.0153728	-0.0786858	0.0516233	0.010135	0.0190326	0.0188069	0.21725
ZHU_CMV_8_HR_DN	-0.0682511	-0.0521336	-0.0666345	0.121271	-0.078336	-0.0446675	0.178109	0.217207
MURAKAMI_UV_RESPONSE_6HR_UP	0.0187912	-0.0252886	-0.0413614	0.0574204	0.0319237	0.0352031	0.0248459	0.217025
ENGELMANN_CANCER_PROGENITORS_UP	0.0370107	0.032785	-0.0155115	0.0258672	-0.0609252	-0.00728916	0.047521	0.216889
WP_CILIARY_LANDSCAPE	-0.00662455	0.00803934	0.00670668	0.00312487	0.0257659	-0.0235068	0.00644896	0.216799
REACTOME_PHASE_II_CONJUGATION_OF_COMPOUNDS	-0.0417327	-0.0129944	-0.115912	0.0142526	0.0780835	0.0343384	-0.075224	0.216549
GALINDO_IMMUNE_RESPONSE_TO_ENTEROTOXIN	-0.108575	0.0246093	-0.138156	0.13705	-0.00383278	0.0762791	0.0707863	0.215417
LEE_TARGETS_OF_PTCH1_AND_SUFU_UP	-0.0356567	-0.00880422	0.00169628	0.0488577	0.100944	-0.0271406	0.0413932	0.214423
REACTOME_SENESCENCE_ASSOCIATED_SECRETORY_PHENOTYPE_SASP	-0.0621136	-0.0112857	-0.0490385	0.0378865	0.00464271	0.0153981	0.0257935	0.213635
DAUER_STAT3_TARGETS_UP	-0.166889	0.0343764	-0.129859	0.0997691	-0.0457306	0.0524757	0.0803778	0.211621
SESTO_RESPONSE_TO_UV_C2	0.000147724	-0.00624227	-0.0499927	0.0538596	-0.0440805	-0.0107566	0.0414463	0.21068
BOQUEST_STEM_CELL_CULTURED_VS_FRESH_DN	0.0123905	0.0354949	-0.192894	0.144658	-0.161734	0.0103044	0.0681704	0.21063
MILI_PSEUDOPODIA	0.00575555	0.0140451	0.0179305	0.0392215	-0.0160932	-0.0237612	0.0791583	0.210249
REACTOME_CYCLIN_A_B1_B2_ASSOCIATED_EVENTS_DURING_G2_M_TRANSITION	-0.107299	0.00674393	0.0363885	0.0010434	0.129307	-0.133811	0.062588	0.210017
PUJANA_ATM_PCC_NETWORK	0.0033022	0.00804104	0.0252997	0.0169181	0.0304125	-0.0235738	0.0378478	0.209513
JAZAG_TGFB1_SIGNALING_VIA_SMAD4_DN	9.67679e-05	-0.0260871	-0.0658701	-0.0038812	-0.0810874	0.0824664	0.0377029	0.209408
SIMBULAN_UV_RESPONSE_NORMAL_DN	-0.0236633	-0.0318046	-0.0360718	0.037073	-0.0608409	0.0194515	0.0815348	0.208945
WP_OXIDATIVE_STRESS	-0.106237	-0.00326548	-0.0248476	0.0500843	0.0114887	0.00859922	0.0837968	0.208134
BANDRES_RESPONSE_TO_CARMUSTIN_MGMT_48HR_DN	-0.0164632	0.00542517	-0.0150875	0.00340385	0.00651939	0.00275669	-0.00655473	0.207958
REACTOME_STIMULI_SENSING_CHANNELS	-0.102016	-0.0302001	9.81553e-05	0.0385821	0.07612	0.0195309	0.0870142	0.207802
EBAUER_TARGETS_OF_PAX3_FOXO1_FUSION_UP	-0.0314466	0.0204361	-0.024606	0.0712736	-0.0329875	0.00117676	0.085622	0.207437
NAKAMURA_CANCER_MICROENVIRONMENT_DN	0.105747	-0.0169486	0.0376623	-0.086661	0.192845	-0.0918385	-0.0503691	0.207298
HOFFMANN_SMALL_PRE_BII_TO_IMMATURE_B_LYMPHOCYTE_DN	-0.0770226	0.0656637	-0.102875	-0.00371008	-0.0700065	-0.0194714	-0.0430348	0.20725
YANAGIHARA_ESX1_TARGETS	-0.0523626	0.00960311	0.0501889	-0.0357853	0.0283477	-0.0601828	0.0586969	0.206502
KEGG_VASCULAR_SMOOTH_MUSCLE_CONTRACTION	-0.022683	0.0236411	-0.0224341	0.0384704	-0.0336887	0.0102127	0.0474508	0.206458
ANASTASSIOU_MULTICANCER_INVASIVENESS_SIGNATURE	0.0739323	0.0548054	-0.130219	0.0462624	-0.121702	0.084826	0.00882526	0.205802
REACTOME_METABOLISM_OF_NUCLEOTIDES	0.0750605	-0.0249017	0.0148467	-0.0297861	0.163603	0.00732403	-0.0260974	0.205609
REACTOME_ARACHIDONIC_ACID_METABOLISM	-0.0313383	0.0310649	-0.0267878	0.130105	-0.0431914	0.0691948	0.171324	0.205326
BOYLAN_MULTIPLE_MYELOMA_C_UP	-0.0917547	0.113286	0.0348025	0.0120455	0.0144806	0.0224316	0.0843494	0.205254
KRIEG_HYPOXIA_VIA_KDM3A	0.0631223	-0.0187043	-0.0492111	0.0967116	0.0133069	0.00888728	0.049477	0.205122
REACTOME_SPHINGOLIPID_DE_NOVO_BIOSYNTHESIS	0.0598535	-0.122419	-0.0199923	-0.131485	0.00806944	0.130676	0.0131816	0.205018
STEIN_ESR1_TARGETS	-0.0554589	-0.0059965	-0.0101175	0.0376842	0.0202843	0.0522419	0.0677623	0.204708
ZHAN_MULTIPLE_MYELOMA_PR_DN	-0.0556255	-0.0541622	-0.0399318	-0.0510312	-0.132528	0.117833	0.11766	0.204296
REACTOME_TRANSPORT_OF_BILE_SALTS_AND_ORGANIC_ACIDS_METAL_IONS_AND_AMINE_COMPOUNDS	0.00431094	0.00360947	-0.164537	0.131142	-0.163149	0.0559315	0.104989	0.203976
CHICAS_RB1_TARGETS_CONFLUENT	0.0124888	0.0163291	-0.0646283	0.0523363	-0.0205486	0.030899	0.00688536	0.203817
STEIN_ESRRA_TARGETS_UP	0.00205987	-0.0212639	0.0169406	-0.023707	0.113771	-0.0250236	-0.00673886	0.203563
TAKEDA_TARGETS_OF_NUP98_HOXA9_FUSION_10D_DN	-0.0405766	0.00779934	-0.10003	0.0886901	-0.0854425	0.0519469	0.0783151	0.203494
DUTERTRE_ESTRADIOL_RESPONSE_24HR_UP	0.0994675	0.0889358	0.0909305	-0.0443215	0.217569	-0.0127594	-0.00828292	0.203337
AMIT_EGF_RESPONSE_120_HELA	-0.104782	-0.0312975	-0.0879686	0.0752551	0.0283645	0.0656196	0.0540215	0.20321
MARZEC_IL2_SIGNALING_DN	0.151293	-0.120948	-0.225871	0.182785	-0.257042	-0.0321742	0.180023	0.202871
AUNG_GASTRIC_CANCER	-0.0234113	0.000512839	-0.0309643	0.0168756	0.025124	0.0124449	-0.00884143	0.202787
HORIUCHI_WTAP_TARGETS_UP	-0.125511	0.0339867	-0.115458	0.116148	-0.161693	0.0411115	0.172051	0.202731
VALK_AML_CLUSTER_6	-0.0155656	0.00355617	0.00782933	0.0422951	-0.0574024	-0.0723613	0.113302	0.202259
GAVIN_FOXP3_TARGETS_CLUSTER_P7	-0.0596281	0.0128949	-0.109722	0.133404	-0.0819349	0.0295521	0.112241	0.202165
KEGG_TOLL_LIKE_RECEPTOR_SIGNALING_PATHWAY	-0.0960043	0.0265582	-0.0653737	0.0292918	-0.00400968	0.0245532	0.00990282	0.202031
BENPORATH_ES_2	0.140818	0.0949517	0.0650133	-0.487393	0.0490082	-0.104448	-0.194669	0.20155
BROWNE_HCMV_INFECTION_2HR_UP	-0.21328	0.0408831	-0.138307	0.139447	0.0235964	0.115385	0.107537	0.201485
KEGG_NEUROTROPHIN_SIGNALING_PATHWAY	-0.0775618	0.0312016	-0.0447298	0.0530756	0.0189129	0.0217353	0.0312309	0.201245
PID_HIV_NEF_PATHWAY	-0.0953521	-0.0509237	-0.0122248	0.0130128	0.197383	-0.0102275	0.0175535	0.199528
MASSARWEH_RESPONSE_TO_ESTRADIOL	-0.0756179	-0.0147823	-0.0785465	0.125209	-0.00773065	0.0395618	0.107037	0.198701
REACTOME_RRNA_MODIFICATION_IN_THE_NUCLEUS_AND_CYTOSOL	-0.0309659	0.01297	0.0321478	0.00803468	0.0712291	0.00349516	0.0386065	0.198528
OUILLETTE_CLL_13Q14_DELETION_DN	-0.0946542	-0.10255	0.191648	-0.233378	0.201986	-0.00955282	0.146429	0.196828
PID_ER_NONGENOMIC_PATHWAY	0.0756394	0.0266419	-0.0348758	0.0827874	-0.056786	0.0157732	0.0755015	0.19677
DACOSTA_UV_RESPONSE_VIA_ERCC3_DN	-0.0315619	0.0178723	-0.0128314	0.0488378	-0.105315	0.0110154	0.140468	0.196466
PID_CASPASE_PATHWAY	-0.0246364	-0.00585362	0.0240003	-0.0142529	0.0436689	-0.0124348	0.0223556	0.195875
KEGG_B_CELL_RECEPTOR_SIGNALING_PATHWAY	-0.0542844	0.0248241	-0.0645533	0.054648	0.00212477	0.055738	0.0210135	0.195813
CREIGHTON_ENDOCRINE_THERAPY_RESISTANCE_3	0.0505104	-0.00120586	-0.0551737	0.0684816	-0.0543626	0.00852417	0.0492818	0.195767
SEITZ_NEOPLASTIC_TRANSFORMATION_BY_8P_DELETION_UP	-0.0205388	-0.0446174	-0.084797	-0.0378555	-0.0960033	-0.0497647	-0.0429305	0.195492
KUMAR_PATHOGEN_LOAD_BY_MACROPHAGES	0.0139171	0.00761041	-0.0051862	0.0195177	-0.0238199	-0.00491806	0.0290513	0.195093
GEORGES_CELL_CYCLE_MIR192_TARGETS	-0.0521632	0.0512471	-0.0249948	-0.0104788	-0.0838937	0.0223316	0.0452954	0.194901
SERVITJA_ISLET_HNF1A_TARGETS_DN	0.0958532	-0.0928198	-0.0113037	0.0743916	0.109629	-0.095398	0.0591113	0.194489
WP_CORTICOTROPINRELEASING_HORMONE_SIGNALING_PATHWAY	-0.0795116	0.0158232	-0.0867433	0.0509641	-0.0268563	0.0557545	0.0244661	0.194433
LIN_NPAS4_TARGETS_DN	-0.0538165	-0.0217566	-0.0642195	0.110203	0.0938932	-0.0173159	0.0394625	0.193896
REACTOME_NEGATIVE_REGULATION_OF_THE_PI3K_AKT_NETWORK	-0.0546028	0.00863725	-0.0592587	0.0645643	0.0322234	0.0539598	0.0254681	0.193606
MARSON_FOXP3_TARGETS_UP	0.00490739	0.0239721	-0.119918	0.093187	-0.0435936	0.0550374	0.0140508	0.193565
GRYDER_PAX3FOXO1_ENHANCERS_KO_DOWN	0.00583916	0.00694002	-0.0316484	0.0317667	-0.0173896	0.000595243	0.0100829	0.193218
REN_ALVEOLAR_RHABDOMYOSARCOMA_DN	0.0101384	0.0322493	-0.0821855	0.0393439	-0.0573608	0.0306241	-0.00332012	0.193112
LU_AGING_BRAIN_UP	-0.00829833	-0.00271173	-0.0623266	0.115186	-0.0802486	-0.00131652	0.123966	0.192703
MARTINEZ_TP53_TARGETS_UP	-0.00313547	-0.000809514	-0.0285001	0.0374056	-0.0406059	0.00599083	0.0434488	0.192124
CUI_GLUCOSE_DEPRIVATION	-0.0203223	-0.00943734	-0.00861531	0.0146332	-0.0418457	0.0140085	0.0584654	0.192054
AMIT_SERUM_RESPONSE_40_MCF10A	-0.159734	0.00320644	-0.0686553	0.0570988	-0.0156939	0.0647649	0.0906243	0.191968
REACTOME_INTERCONVERSION_OF_NUCLEOTIDE_DI_AND_TRIPHOSPHATES	0.0885944	0.014002	0.0706174	-0.0280771	0.203436	0.00178583	0.00351479	0.190548
WP_TGFBETA_RECEPTOR_SIGNALLING_IN_SKELETAL_DYSPLASIAS	-0.0883713	0.0212084	-0.154191	0.178521	-0.150258	0.0832174	0.177657	0.190389
REACTOME_REGULATION_OF_INSULIN_LIKE_GROWTH_FACTOR_IGF_TRANSPORT_AND_UPTAKE_BY_INSULIN_LIKE_GROWTH_FACTOR_BINDING_PROTEINS_IGFBPS	0.0443095	0.0521854	-0.118946	0.123357	-0.168617	0.00989359	0.105972	0.19031
PASQUALUCCI_LYMPHOMA_BY_GC_STAGE_UP	0.0691202	0.0194385	-0.0747837	0.0544179	-0.0541158	0.0281487	0.0103765	0.189934
SHEDDEN_LUNG_CANCER_GOOD_SURVIVAL_A5	0.0672325	-0.11796	0.135247	-0.334896	0.20056	-0.0722604	-0.028583	0.189856
RASHI_RESPONSE_TO_IONIZING_RADIATION_1	-0.118072	-0.021325	-0.0277587	0.0149804	0.0338682	0.0373743	0.0506882	0.188255
LI_DCP2_BOUND_MRNA	-0.0254162	-0.0114957	0.00956936	-0.0257763	0.057645	0.0301129	0.00365624	0.188
REACTOME_CYTOSOLIC_TRNA_AMINOACYLATION	0.138876	-0.0988193	0.050158	-0.104906	0.255845	-0.0435555	-0.0366666	0.187966
LEONARD_HYPOXIA	-0.0654305	-0.0438324	-0.0514926	0.163901	0.0643303	-0.0289336	0.135338	0.187813
DELPUECH_FOXO3_TARGETS_UP	-0.0536873	-0.0277084	-0.0747548	0.0304795	-0.02738	0.0673599	0.0262717	0.187486
WP_COMPLEMENT_AND_COAGULATION_CASCADES	0.211965	0.00394347	-0.159139	0.049421	-0.144122	0.090455	0.00329625	0.187257
CAFFAREL_RESPONSE_TO_THC_DN	-0.0109298	0.0276555	0.0243895	-0.068095	0.0859367	0.0314708	-0.0255684	0.187162
NADLER_HYPERGLYCEMIA_AT_OBESITY	0.0131213	0.0464858	-0.0440387	0.0165979	-0.022446	-0.0207716	-0.0231376	0.186886
REACTOME_PLATELET_ACTIVATION_SIGNALING_AND_AGGREGATION	0.0100426	0.029946	-0.0571055	0.0418548	-0.0533843	0.0343092	0.0200592	0.186682
PID_INTEGRIN_A9B1_PATHWAY	-0.04457	0.0321413	-0.0937366	0.159885	-0.126189	0.0241259	0.171971	0.186409
NAGASHIMA_NRG1_SIGNALING_UP	-0.163948	0.00387737	-0.144832	0.12508	-0.0170033	0.0572502	0.0699622	0.185289
BENPORATH_PROLIFERATION	0.066906	0.0353671	0.0210859	0.0188197	0.00980634	0.0321378	0.0270746	0.184965
LINDGREN_BLADDER_CANCER_CLUSTER_2A_DN	-0.0329572	-0.00571548	-0.0606728	0.0778042	-0.0408914	0.0235109	0.0655833	0.184186
BLANCO_MELO_COVID19_SARS_COV_2_INFECTION_A594_ACE2_EXPRESSING_CELLS_DN	0.0180789	0.00446687	-0.0451058	0.00599036	0.0048626	0.0265763	-0.0287984	0.183713
DORN_ADENOVIRUS_INFECTION_24HR_DN	-0.0879048	0.00938709	-0.103683	0.110525	0.0295088	0.0564862	0.038402	0.183367
SCHOEN_NFKB_SIGNALING	-0.0869506	0.00861877	-0.267665	0.267686	-0.266719	0.119228	0.239923	0.182916
REACTOME_BIOSYNTHESIS_OF_THE_N_GLYCAN_PRECURSOR_DOLICHOL_LIPID_LINKED_OLIGOSACCHARIDE_LLO_AND_TRANSFER_TO_A_NASCENT_PROTEIN	0.143277	-0.0390721	-0.186725	-0.362124	0.184598	0.0438642	-0.390294	0.182478
HOSHIDA_LIVER_CANCER_SUBCLASS_S3	0.00556752	0.0195701	-0.0505345	0.0334857	-0.0379704	0.0352925	0.0113742	0.181338
WU_SILENCED_BY_METHYLATION_IN_BLADDER_CANCER	-0.231389	0.00805066	-0.178689	0.143171	-0.20124	0.155274	0.228303	0.180764
REACTOME_OTHER_INTERLEUKIN_SIGNALING	-0.034124	-0.091478	-0.0133502	0.157835	0.168851	-0.0359202	0.140006	0.180649
DORN_ADENOVIRUS_INFECTION_12HR_DN	-0.0979409	-0.000568954	-0.111734	0.11719	0.0476413	0.0595991	0.0360918	0.180551
REACTOME_RHO_GTPASES_ACTIVATE_NADPH_OXIDASES	-0.00359005	0.0700329	-0.00438712	-0.0853779	0.0460018	0.018364	-0.065892	0.180293
CAIRO_HEPATOBLASTOMA_CLASSES_DN	-0.0358996	0.0235936	-0.107713	0.0686998	-0.0417842	0.0664056	0.0109631	0.179258
FOSTER_TOLERANT_MACROPHAGE_DN	-0.0550685	0.00385581	-0.046797	0.108259	-0.0494205	0.0230458	0.124809	0.178657
PHONG_TNF_RESPONSE_VIA_P38_PARTIAL	-0.0786155	-0.0196981	-0.0635886	0.0720214	-0.0729466	0.0515995	0.110254	0.17863
WP_MBDNF_AND_PROBDNF_REGULATION_OF_GABA_NEUROTRANSMISSION	-0.0293926	0.0559764	0.0196246	-0.112187	-0.250083	-0.00630797	0.145641	0.178408
PID_LYMPH_ANGIOGENESIS_PATHWAY	0.067593	0.0327343	-0.0474572	-0.0212798	-0.105146	0.0139401	0.0026506	0.177838
WP_PI3KAKTMTOR_SIGNALING_PATHWAY_AND_THERAPEUTIC_OPPORTUNITIES	0.0199669	0.0109388	0.0602545	-0.0404424	-0.0608297	-0.0796405	0.0963592	0.177324
WONG_ADULT_TISSUE_STEM_MODULE	-0.0544245	0.0293218	-0.110755	0.0918802	-0.115443	0.0422022	0.0752582	0.176778
MONNIER_POSTRADIATION_TUMOR_ESCAPE_UP	-0.0472002	0.0188066	0.0452159	-0.00678681	-0.00603254	0.0113289	0.0878546	0.176756
HENDRICKS_SMARCA4_TARGETS_UP	0.0546242	0.0497976	-0.0790139	0.0529567	-0.0702465	0.0342946	0.00652479	0.176466
HSIAO_HOUSEKEEPING_GENES	-0.00662174	0.00743938	-0.0123476	0.0168449	0.00653946	0.00702872	0.00299402	0.175941
GOBERT_OLIGODENDROCYTE_DIFFERENTIATION_UP	0.030528	0.0740343	0.0498407	0.0490117	0.134494	-0.0161348	0.028739	0.175801
WP_DIFFERENTIATION_PATHWAY	-0.106087	0.0175492	-0.307786	0.374652	-0.0926587	0.110463	0.182915	0.175743
POMEROY_MEDULLOBLASTOMA_PROGNOSIS_UP	0.0123377	-0.0350632	0.0358012	-0.0346919	-0.0491333	0.0282614	0.0917123	0.175619
SCHLOSSER_MYC_TARGETS_AND_SERUM_RESPONSE_UP	-0.0210077	0.0258001	-0.010135	0.0415299	0.0529406	0.0105283	0.0116532	0.175609
GARGALOVIC_RESPONSE_TO_OXIDIZED_PHOSPHOLIPIDS_TURQUOISE_UP	-0.111543	-0.00365282	-0.0540188	0.0315398	-0.0428901	0.0301692	0.0596647	0.17544
WP_TOLLLIKE_RECEPTOR_SIGNALING_PATHWAY	-0.10958	0.0263731	-0.0655589	0.0295095	-0.00425652	0.0248111	0.0101206	0.174953
ABRAHAM_ALPC_VS_MULTIPLE_MYELOMA_UP	-0.066968	0.00132698	-0.0370755	0.141272	0.053039	-0.0348493	0.105666	0.174691
RICKMAN_HEAD_AND_NECK_CANCER_C	-0.0478081	-0.142168	-0.0590809	0.319439	0.101839	0.0909545	0.339499	0.174487
HADDAD_T_LYMPHOCYTE_AND_NK_PROGENITOR_UP	-0.0678226	0.0218536	-0.0831574	0.130488	-0.151429	0.0225832	0.177309	0.173768
WHITFIELD_CELL_CYCLE_G1_S	0.0375759	-0.00517703	0.0331244	0.0242468	0.0675735	-0.0304988	0.0356554	0.173498
REACTOME_RNA_POLYMERASE_II_TRANSCRIPTION	-0.0483538	-0.00159943	-0.0189703	0.0356724	0.0346682	0.00867781	0.0240775	0.173343
WP_NUCLEOTIDEBINDING_OLIGOMERIZATION_DOMAIN_NOD_PATHWAY	-0.0908786	0.0376521	-0.113705	0.0622023	0.0791694	0.0384284	-0.0480106	0.173224
GU_PDEF_TARGETS_UP	0.0541533	0.0503261	-0.139438	0.12708	-0.149216	-0.00493667	0.0599374	0.173021
SENESE_HDAC1_TARGETS_UP	0.032065	-0.00225605	-0.0243184	0.0309094	-0.0860316	0.00784142	0.0703734	0.172923
SARRIO_EPITHELIAL_MESENCHYMAL_TRANSITION_DN	-0.0371975	-0.0124201	-0.0997846	0.0627935	-0.049724	0.0481379	0.0224479	0.172192
BIOCARTA_INTEGRIN_PATHWAY	-0.0578745	0.00454136	-0.0281788	0.0532544	-0.0370166	0.0310457	0.0801419	0.171969
GENTILE_UV_RESPONSE_CLUSTER_D7	-0.135665	0.0284633	0.0135053	0.072118	0.0370707	-0.0663707	0.124023	0.17189
BERENJENO_TRANSFORMED_BY_RHOA_UP	-0.00820769	0.00965703	0.000950685	0.0798752	0.0542214	0.0101117	0.0602026	0.171573
STEARMAN_TUMOR_FIELD_EFFECT_UP	-0.0388087	0.0285898	-0.054101	0.0900343	-0.121137	-0.0114772	0.125242	0.171309
REACTOME_SIGNALING_BY_PTK6	-0.0257716	-0.0027657	0.00517206	0.0436457	0.00836563	0.00693316	0.0645144	0.171263
MULLIGHAN_MLL_SIGNATURE_2_DN	-0.0201435	0.00446125	-0.0283368	0.0591773	-0.038719	-0.00457611	0.0633976	0.17051
LASTOWSKA_NEUROBLASTOMA_COPY_NUMBER_UP	-0.0203906	-0.0109565	0.0363076	-0.0386437	0.11816	-0.012345	0.000740378	0.169789
KEGG_PYRUVATE_METABOLISM	-0.00143077	0.000953892	-0.0123061	0.0308498	0.117671	-0.0781926	-0.0172511	0.168542
WANG_IMMORTALIZED_BY_HOXA9_AND_MEIS1_DN	-0.0909907	0.00204719	-0.309542	0.19077	-0.0379612	0.214186	-0.00252102	0.168538
MORI_PRE_BI_LYMPHOCYTE_DN	-0.0804333	0.0478149	-0.0949648	0.0664817	-0.112938	0.066196	0.0722683	0.167406
WP_EXTRACELLULAR_VESICLEMEDIATED_SIGNALING_IN_RECIPIENT_CELLS	0.0884842	0.0635505	-0.126573	0.0848752	-0.139283	0.104844	0.0417104	0.167169
SESTO_RESPONSE_TO_UV_C7	0.0519069	0.00425615	0.00345088	0.00778485	0.00158483	0.00178273	0.0100158	0.166936
CASORELLI_ACUTE_PROMYELOCYTIC_LEUKEMIA_UP	-0.0533801	-0.0100993	-0.0667392	0.0696888	-0.0227721	0.0481032	0.0500718	0.165994
TIEN_INTESTINE_PROBIOTICS_6HR_UP	-0.0129297	-0.00152622	-0.00957642	0.0054585	0.00164833	0.00540186	0.00193289	0.165738
KEGG_FC_GAMMA_R_MEDIATED_PHAGOCYTOSIS	-0.0346276	0.00696484	0.0194941	-0.0321104	-0.023093	0.0118163	0.0366247	0.164974
REACTOME_TRANSCRIPTIONAL_ACTIVATION_OF_MITOCHONDRIAL_BIOGENESIS	-0.0393997	-0.00345187	0.0280177	-0.0122497	0.0203093	-0.0131387	0.0402282	0.164599
HAMAI_APOPTOSIS_VIA_TRAIL_DN	-0.0316535	0.0136331	0.000214574	-0.0277474	-0.0173626	0.0356634	0.0142765	0.164143
OZEN_MIR125B1_TARGETS	0.0266064	-0.256942	0.147309	-0.148837	0.291373	-0.392886	0.106025	0.16392
REACTOME_UCH_PROTEINASES	-0.049322	0.00228137	-0.0120877	0.0381194	0.126843	0.00882994	0.00421991	0.163469
MANALO_HYPOXIA_DN	-0.0501321	0.0170031	0.0796286	-0.00187887	0.221561	0.00739434	0.0497859	0.161775
PID_EPO_PATHWAY	0.0484987	0.00288832	-0.120245	0.202577	-0.0350524	0.0271683	0.0972525	0.161521
TIAN_TNF_SIGNALING_VIA_NFKB	-0.27118	0.104062	-0.197793	0.257027	-0.0510353	0.142555	0.180974	0.161293
WANG_BARRETTS_ESOPHAGUS_DN	0.120978	0.0515555	-0.0991378	-0.0562554	-0.118304	0.0409218	-0.0690833	0.160555
KRIGE_RESPONSE_TO_TOSEDOSTAT_6HR_UP	-0.0165925	-0.00276568	0.000171029	0.0131444	-0.0360836	-0.00211955	0.0504279	0.160309
DE_YY1_TARGETS_DN	-0.0134104	0.00251826	-0.0152841	0.0587018	-0.0731605	-0.00896984	0.102215	0.160282
DELYS_THYROID_CANCER_DN	-0.0507176	0.00498349	-0.0740414	0.0515398	-0.0087411	0.0354524	0.00552029	0.160103
REACTOME_SYNDECAN_INTERACTIONS	0.0980027	0.0434494	-0.110235	0.0936596	-0.193214	-0.015212	0.0797012	0.160044
ONGUSAHA_TP53_TARGETS	0.0864118	-0.0143314	-0.106822	-0.00436839	-0.0823082	0.0111687	-0.0500636	0.159758
GNATENKO_PLATELET_SIGNATURE	-0.00336721	0.0211623	-0.0368879	0.0353284	-0.0173084	0.0243214	0.00847	0.15969
LANG_MYB_FAMILY_TARGETS	0.00212623	0.00369509	-0.0210114	0.0519346	-0.0785432	0.00368404	0.0889835	0.159477
REACTOME_DNA_DAMAGE_TELOMERE_STRESS_INDUCED_SENESCENCE	-0.16672	-0.0952388	0.0263513	0.00571703	0.117948	0.0415839	0.127768	0.15932
REACTOME_GAMMA_CARBOXYLATION_HYPUSINE_FORMATION_AND_ARYLSULFATASE_ACTIVATION	0.106663	-0.0644548	-0.0575715	-0.0980606	0.0425392	0.0161554	-0.10068	0.158544
HAN_SATB1_TARGETS_UP	0.0068972	0.0110349	-0.0588653	0.0696894	-0.100319	-0.00594747	0.0713464	0.158438
DESERT_PERIVENOUS_HEPATOCELLULAR_CARCINOMA_SUBCLASS_UP	-0.00989646	0.00538015	-0.0502427	0.0482253	-0.0252339	0.00551236	0.0142132	0.158357
MEBARKI_HCC_PROGENITOR_FZD8CRD_DN	0.0114257	0.00531027	-0.102899	0.0542584	-0.139305	0.0276855	0.0449216	0.158229
ACOSTA_PROLIFERATION_INDEPENDENT_MYC_TARGETS_DN	-0.0015268	0.00721784	-0.0413257	0.0163679	-0.044309	0.014675	0.00516622	0.157586
PID_IL23_PATHWAY	-0.00249833	-0.0245727	-0.024665	0.142186	0.00742031	-0.0180797	0.130879	0.15713
SHEN_SMARCA2_TARGETS_UP	0.00308868	0.0132837	0.0174122	0.0243241	-0.0545205	-0.0259239	0.0843069	0.156641
CHANDRAN_METASTASIS_TOP50_DN	-0.0826432	0.0273182	-0.0412629	0.0517563	0.035753	0.00339621	0.0159887	0.156532
SATO_SILENCED_BY_DEACETYLATION_IN_PANCREATIC_CANCER	-0.036639	-0.0963557	-0.20196	0.141779	0.135875	0.181672	-0.0181181	0.1562
REACTOME_MITOTIC_G1_PHASE_AND_G1_S_TRANSITION	-0.0306014	-0.00438126	0.0210618	0.00502183	0.114782	-0.0103367	0.0105419	0.156089
RHODES_UNDIFFERENTIATED_CANCER	0.00938309	0.0666796	0.0126604	0.0500833	0.11315	0.00475321	0.00134953	0.156014
SA_B_CELL_RECEPTOR_COMPLEXES	-0.0479675	0.0353506	-0.0264938	0.0140707	-0.028665	0.0450759	0.0250349	0.155349
WP_ESC_PLURIPOTENCY_PATHWAYS	-0.0669212	0.00891929	-0.0695323	0.0994671	-0.0866159	0.0290803	0.10853	0.154684
SCHAEFFER_PROSTATE_DEVELOPMENT_48HR_DN	-0.050642	0.0343541	-0.0706968	0.0837046	-0.0929008	-0.00192173	0.0738162	0.154652
BURTON_ADIPOGENESIS_PEAK_AT_2HR	-0.210155	-0.00117419	-0.17908	0.172238	-0.00430846	0.0877063	0.0843261	0.154467
PETROVA_PROX1_TARGETS_DN	0.143582	0.0591652	-0.187005	0.0315316	-0.262825	0.0354553	-0.00684581	0.154237
PID_TCR_CALCIUM_PATHWAY	-0.168157	0.0391236	-0.106927	0.129999	-0.00787539	0.0544723	0.0833333	0.15373
REACTOME_NOTCH2_ACTIVATION_AND_TRANSMISSION_OF_SIGNAL_TO_THE_NUCLEUS	-0.0504153	-0.0158684	-0.0118194	0.0290641	0.00715569	0.0157352	0.0451882	0.153728
IWANAGA_CARCINOGENESIS_BY_KRAS_PTEN_DN	-0.0063344	-0.0106041	0.00106604	0.0395797	-0.0041893	0.00528617	0.0558052	0.153298
GAL_LEUKEMIC_STEM_CELL_DN	0.0545633	0.023888	-0.0776821	0.0265521	0.0181379	0.0159131	-0.0605451	0.153135
RAY_TUMORIGENESIS_BY_ERBB2_CDC25A_DN	-0.0205048	0.00833941	-0.0297161	0.0240287	0.000225577	-0.00196132	-0.0027002	0.153002
KEGG_PORPHYRIN_AND_CHLOROPHYLL_METABOLISM	0.0100651	-6.40535e-05	-0.0470082	0.15771	-0.0816847	0.00824264	0.167109	0.152389
VANTVEER_BREAST_CANCER_ESR1_DN	-0.000108921	0.00502125	-0.0160574	0.0422184	-0.0138633	0.00637062	0.0342507	0.152256
REACTOME_INTERACTION_BETWEEN_L1_AND_ANKYRINS	-0.0227846	0.0131483	-0.0171988	0.0364169	-0.0154324	0.000236573	0.0314748	0.152123
TAKAO_RESPONSE_TO_UVB_RADIATION_DN	-0.0336282	-0.0247094	0.00737103	0.0213157	0.00775308	0.00423803	0.0567054	0.151882
BILD_MYC_ONCOGENIC_SIGNATURE	0.0464648	-0.00981479	-0.0219296	0.000381418	0.0435187	0.00258779	-0.0313095	0.151534
KIM_WT1_TARGETS_8HR_UP	-0.0679284	0.00187133	-0.0800197	0.0546169	-0.0125352	0.0529118	0.0146518	0.15125
PID_RHOA_PATHWAY	-0.0317702	0.00435079	-0.0087928	0.0363682	-0.0476512	-0.0212833	0.0683694	0.149631
GRAHAM_CML_DIVIDING_VS_NORMAL_QUIESCENT_UP	0.0845924	0.0915724	-0.0303231	0.0101967	0.109124	-0.000145451	-0.0819495	0.149572
WP_INTERFERON_TYPE_I_SIGNALING_PATHWAYS	-0.0454402	0.016754	-0.034912	0.0868804	0.0344062	-0.000951085	0.0423669	0.149426
REACTOME_SWITCHING_OF_ORIGINS_TO_A_POST_REPLICATIVE_STATE	-0.0572611	-0.00480443	0.0160706	0.0220294	0.122589	0.0118169	0.0261665	0.14857
REACTOME_DNA_REPLICATION	-0.0484798	-0.000827189	0.0223679	0.0137371	0.125049	0.0052435	0.0206625	0.148243
PID_IGF1_PATHWAY	-0.00890623	0.0255258	-0.0480699	0.0611889	0.00154025	0.0181491	0.00843246	0.148154
BROWNE_HCMV_INFECTION_18HR_UP	-0.0279853	-0.0156702	0.0224076	0.0256076	0.0118652	-0.0015927	0.0706538	0.147628
WP_BASE_EXCISION_REPAIR	0.0591394	0.0250779	-0.0237303	-0.0642648	0.152756	0.0099491	-0.111886	0.146879
YAO_TEMPORAL_RESPONSE_TO_PROGESTERONE_CLUSTER_5	-0.0933039	-0.0284376	-0.0703719	0.0726163	-0.0630797	0.0432649	0.0901742	0.146491
UZONYI_RESPONSE_TO_LEUKOTRIENE_AND_THROMBIN	-0.331558	-0.0239277	-0.169223	0.109893	-0.0757113	0.115429	0.137464	0.145821
GAZDA_DIAMOND_BLACKFAN_ANEMIA_PROGENITOR_UP	-0.0278384	-0.00456509	-0.01663	0.0174532	0.00801881	0.0124103	0.0107566	0.145527
WP_INTERLEUKIN11_SIGNALING_PATHWAY	-0.047382	0.0435925	-0.0903245	0.113761	0.0259557	0.0521095	0.0168673	0.145277
PID_HNF3A_PATHWAY	-0.151514	0.0130322	-0.0813537	0.0637643	0.00794803	0.044501	0.0367793	0.144556
WOTTON_RUNX_TARGETS_DN	0.019377	-0.0237332	-0.150282	0.163138	-0.269515	0.000950171	0.189015	0.144191
REICHERT_MITOSIS_LIN9_TARGETS	0.133143	0.0321916	0.0285403	0.126499	0.0920617	-0.115361	0.0760566	0.143891
REACTOME_DNA_REPLICATION_PRE_INITIATION	-0.0586786	-0.00563315	0.0130892	0.0251704	0.146168	0.00483389	0.0173041	0.143687
KEGG_PYRIMIDINE_METABOLISM	0.0673464	0.0144142	-0.0243634	-0.0199438	0.15572	0.0471902	-0.0807249	0.142107
IVANOVA_HEMATOPOIESIS_STEM_CELL_AND_PROGENITOR	-0.00423858	-0.00217265	0.00167332	0.0427396	-0.0412181	-0.00844958	0.0775834	0.139798
WP_FERROPTOSIS	-0.0603116	0.028556	-0.0369026	0.0482083	-0.0130703	0.00770035	0.0288355	0.139675
WP_HEMATOPOIETIC_STEM_CELL_DIFFERENTIATION	-0.0777137	-0.0255058	-0.139244	0.208961	-0.0110042	0.0805468	0.11612	0.139597
KEGG_VALINE_LEUCINE_AND_ISOLEUCINE_DEGRADATION	0.0272683	0.042701	-0.0294321	-0.107294	0.161814	-0.068853	-0.157596	0.139384
REACTOME_G1_S_SPECIFIC_TRANSCRIPTION	-0.0276442	0.0303578	0.225768	-0.110089	0.461055	-0.120747	0.0519252	0.138953
IVANOVA_HEMATOPOIESIS_STEM_CELL	-0.0967528	0.0283012	-0.0544178	0.0592815	-0.0670538	0.040547	0.07478	0.138663
SCHUETZ_BREAST_CANCER_DUCTAL_INVASIVE_UP	0.0320605	0.0148144	-0.103281	0.139945	-0.131205	0.014324	0.101125	0.137722
BASAKI_YBX1_TARGETS_DN	-0.0126222	-0.0137358	-0.0436553	0.0989672	-0.0897359	0.00272569	0.12118	0.137622
REACTOME_INNATE_IMMUNE_SYSTEM	-0.0107403	-0.00184857	-0.0180215	0.00750693	0.00637456	0.00855933	-0.00724478	0.137169
REACTOME_DNA_DAMAGE_RECOGNITION_IN_GG_NER	-0.0724521	0.0107225	-0.00315629	-0.0242467	0.0556038	0.0178242	-0.00983534	0.136357
DELACROIX_RARG_BOUND_MEF	-0.0290632	0.00530444	-0.0652875	0.0588945	-0.0521981	0.0395531	0.0355812	0.136347
ZHENG_FOXP3_TARGETS_IN_THYMUS_UP	-0.0118115	-0.00614667	-0.0949947	0.093304	-0.12354	0.0506168	0.0860145	0.13634
KAAB_FAILED_HEART_ATRIUM_UP	0.0576254	-0.0334501	0.0357078	-0.0752257	0.138641	-0.067865	-0.0475016	0.135766
REACTOME_SPHINGOLIPID_METABOLISM	0.0630009	-0.105768	-0.00164435	-0.120792	-0.0239773	0.0711789	0.000133586	0.135265
BILD_HRAS_ONCOGENIC_SIGNATURE	-0.0197675	-0.0144538	-0.0539012	0.0920685	-0.0288572	0.0215865	0.0660225	0.135084
MALONEY_RESPONSE_TO_17AAG_DN	-0.0155349	0.0171221	0.00346111	0.0160044	0.0551585	0.00729483	0.000628336	0.133049
WEI_MIR34A_TARGETS	0.0159263	-0.00257325	-0.0141797	0.0340384	-0.0177258	-0.00999053	0.0256733	0.132982
KEGG_ACUTE_MYELOID_LEUKEMIA	-0.0130757	0.00765245	-0.0830789	0.0223595	-0.0328483	0.0193887	-0.0357551	0.13294
KANG_DOXORUBICIN_RESISTANCE_UP	0.111873	0.10828	-0.00266096	0.0280053	0.204507	0.0200921	-0.0836858	0.132802
FIGUEROA_AML_METHYLATION_CLUSTER_1_DN	-0.0262859	-0.0259926	-0.0063462	0.037785	-0.0156283	-0.0413363	0.057126	0.132389
BURTON_ADIPOGENESIS_9	-0.106438	0.0490412	-0.140543	0.183681	-0.12192	0.054082	0.126819	0.13173
WP_ALPHA_6_BETA_4_SIGNALING_PATHWAY	0.126295	0.0378236	-0.080384	0.0824817	-0.0497727	0.0178313	-0.000846981	0.130957
KOYAMA_SEMA3B_TARGETS_DN	0.00955673	0.0140982	-0.0399662	0.053454	-0.0395494	0.00370286	0.0270051	0.130816
MARTIN_VIRAL_GPCR_SIGNALING_UP	-0.0279017	0.0509209	-0.189393	0.196136	-0.411608	-0.0277123	0.243667	0.130418
YAO_TEMPORAL_RESPONSE_TO_PROGESTERONE_CLUSTER_17	-0.0215934	0.00142919	0.00918416	-0.0159434	0.102462	0.013572	-0.0196988	0.130389
REACTOME_FATTY_ACYL_COA_BIOSYNTHESIS	0.232639	-0.0677662	0.0379965	-0.0745688	0.0665576	-0.150617	-0.0247484	0.130342
FEVR_CTNNB1_TARGETS_UP	0.00341093	-0.0116683	-0.0475647	0.0410778	-0.0872811	0.0222067	0.0548503	0.129826
PID_IL12_2PATHWAY	-0.126396	0.0178554	-0.101133	0.105818	0.0259829	0.0123244	0.0200983	0.128586
VERRECCHIA_DELAYED_RESPONSE_TO_TGFB1	0.0426032	0.0356814	-0.0493952	0.0993725	-0.168169	0.00230026	0.135236	0.1285
REACTOME_TRNA_AMINOACYLATION	0.143488	-0.0982126	0.0583986	-0.0670511	0.245751	-0.0669868	-0.0381221	0.127507
HOOI_ST7_TARGETS_DN	0.0209015	0.0560486	-0.0906156	0.120625	-0.130501	0.0276824	0.0824963	0.127432
REACTOME_P75_NTR_RECEPTOR_MEDIATED_SIGNALLING	-0.0307224	0.00609842	-0.0383931	0.0383236	0.0401105	-0.00851799	-0.0139131	0.127223
OSWALD_HEMATOPOIETIC_STEM_CELL_IN_COLLAGEN_GEL_DN	-0.0162431	0.00875248	0.0023999	0.0414713	-0.0401049	-0.0264959	0.0703611	0.126124
DANG_REGULATED_BY_MYC_DN	-0.0243146	0.0180917	-0.057913	0.0807397	-0.0813653	0.0346906	0.0736898	0.125938
NOUZOVA_METHYLATED_IN_APL	0.135827	-0.13645	0.182711	-0.438886	0.017136	-0.0707765	-0.00680535	0.125929
SASSON_RESPONSE_TO_FORSKOLIN_UP	-0.0788277	0.0107002	-0.0727323	0.0626216	0.0534839	0.0287637	-0.0119914	0.12574
CHIBA_RESPONSE_TO_TSA	-0.0879726	-0.00257365	-0.0446455	0.0367341	0.00664263	0.0278819	0.0229925	0.125557
WANG_SMARCE1_TARGETS_DN	-0.0354584	0.0120238	0.0115437	0.0628892	0.0316571	-0.0131519	0.0660228	0.1248
MARSHALL_VIRAL_INFECTION_RESPONSE_DN	-0.226041	0.0277724	-0.163792	0.16571	-0.189733	0.140562	0.192139	0.124359
RIZKI_TUMOR_INVASIVENESS_3D_UP	-0.00229129	-0.0121004	-0.000870142	0.0322586	0.0208831	-0.00320072	0.0264131	0.124174
BAELDE_DIABETIC_NEPHROPATHY_DN	0.0190436	0.0101345	-0.0189586	0.0562429	-0.0608741	-0.00130614	0.0657149	0.124094
REACTOME_APC_C_CDC20_MEDIATED_DEGRADATION_OF_CYCLIN_B	-0.0422266	0.0108957	0.00893071	-0.00757742	0.0104143	0.015785	0.0190287	0.123996
REACTOME_DISEASES_OF_CARBOHYDRATE_METABOLISM	-0.055756	-0.0312671	0.0340643	-0.0449108	0.0415776	-0.018246	0.0264561	0.123481
ZHANG_PROLIFERATING_VS_QUIESCENT	-0.0134808	-0.00445731	0.00336133	0.0419629	0.0315246	-0.00479077	0.0355721	0.123233
SIMBULAN_PARP1_TARGETS_UP	0.06312	0.0265392	-0.0992433	0.120772	-0.0127124	0.00155156	-0.00184163	0.122291
TAKEDA_TARGETS_OF_NUP98_HOXA9_FUSION_6HR_DN	-0.197415	0.0357229	-0.109639	0.115544	0.00912892	0.0415679	0.0518093	0.120952
NICK_RESPONSE_TO_PROC_TREATMENT_DN	0.0725322	0.0188333	-0.0213652	0.160585	-0.179537	0.00817214	0.231608	0.120317
KEGG_BASE_EXCISION_REPAIR	0.0505577	0.0237966	-0.0205371	-0.0696081	0.143714	0.0115913	-0.116428	0.120103
KEGG_AMINOACYL_TRNA_BIOSYNTHESIS	0.162749	-0.119607	0.0977061	-0.122834	0.229917	-0.129218	-0.0282901	0.119821
PICCALUGA_ANGIOIMMUNOBLASTIC_LYMPHOMA_DN	-0.212529	0.0269398	-0.123425	0.123748	-0.040255	0.0644138	0.0826216	0.119229
ZAMORA_NOS2_TARGETS_UP	-0.0272669	-0.00721318	0.031067	-0.0108245	0.120704	-0.0196815	0.000289247	0.118172
PID_SMAD2_3NUCLEAR_PATHWAY	-0.075636	-0.00400297	-0.0769759	0.0669136	0.0361236	0.0583081	0.00333656	0.117637
LY_AGING_PREMATURE_DN	-0.0755964	0.0677478	-0.0515329	0.170231	0.0602247	0.0194043	0.077937	0.117014
KEGG_ALANINE_ASPARTATE_AND_GLUTAMATE_METABOLISM	0.249689	-0.211243	0.0872542	-0.064935	0.0943338	-0.0451199	0.0931507	0.116599
BRUINS_UVC_RESPONSE_VIA_TP53_GROUP_A	0.00952033	0.00929352	-0.0273052	0.0191464	-0.0506573	0.0190595	0.0201886	0.116383
LEE_AGING_CEREBELLUM_UP	-0.0253351	0.0127731	-0.0335538	0.0431876	-0.0501016	0.0499689	0.0498901	0.116299
REACTOME_IMMUNOREGULATORY_INTERACTIONS_BETWEEN_A_LYMPHOID_AND_A_NON_LYMPHOID_CELL	0.0100617	0.0289407	-0.048717	0.0256624	-0.0740366	0.0250797	0.0131958	0.116164
ABE_VEGFA_TARGETS_30MIN	-0.190078	0.0505954	-0.157304	0.174795	-0.0475867	0.186855	0.108527	0.116041
TAYLOR_METHYLATED_IN_ACUTE_LYMPHOBLASTIC_LEUKEMIA	-0.0707311	0.0100058	-0.0612915	0.0209857	0.00579842	0.0417298	-0.0161567	0.115557
HAHTOLA_MYCOSIS_FUNGOIDES_CD4_UP	-0.14046	-0.0214978	-0.0590773	0.0535835	-0.0545191	0.0602288	0.0884249	0.114641
DARWICHE_PAPILLOMA_RISK_HIGH_DN	-0.0347844	0.000780198	-0.0395198	0.0606793	0.00948909	0.00129684	0.0202374	0.114365
WP_MIRNAS_INVOLVEMENT_IN_THE_IMMUNE_RESPONSE_IN_SEPSIS	-0.28803	0.00579446	-0.177069	0.195465	-0.172882	0.0599713	0.194447	0.114219
MMS_MOUSE_LYMPH_HIGH_4HRS_UP	-0.0618509	0.0220032	-0.0179391	0.0732286	-0.0560032	0.0211294	0.101229	0.113643
REACTOME_REGULATION_OF_TP53_ACTIVITY	-0.079155	0.00560577	0.0494421	-0.0485949	0.109403	-0.0135439	0.0103844	0.112679
ZWANG_EGF_INTERVAL_UP	0.0882199	-0.0185476	-0.0135785	-0.0127828	-0.051642	0.114636	0.0380831	0.112341
BIDUS_METASTASIS_UP	-0.0345048	0.0156688	0.0238888	0.0765247	0.0742177	-0.00821068	0.0700114	0.112263
REACTOME_SIGNALING_BY_TGF_BETA_RECEPTOR_COMPLEX	-0.0547946	-0.00288595	-0.0556157	0.0675889	0.000811762	0.0222325	0.0250398	0.11069
WP_PREIMPLANTATION_EMBRYO	-0.106909	-0.0491641	-0.00883702	-0.0280459	0.0384619	0.0345312	0.0217288	0.11012
WP_DNA_DAMAGE_RESPONSE_ONLY_ATM_DEPENDENT	-0.0511972	0.0176795	-0.0482869	0.0587099	-0.0237937	0.0413416	0.0341354	0.109904
REACTOME_IRON_UPTAKE_AND_TRANSPORT	-0.0391909	0.0108775	-0.0278896	0.0623615	-0.0331671	0.0065305	0.0566507	0.109444
STAMBOLSKY_RESPONSE_TO_VITAMIN_D3_UP	-0.0200762	0.0685273	-0.151769	0.201103	-0.204287	0.0412165	0.134986	0.109088
KIM_GERMINAL_CENTER_T_HELPER_UP	-0.0226079	0.049289	-0.0126372	-0.0550595	-0.215023	-0.0122662	0.0802122	0.108875
GRAHAM_CML_QUIESCENT_VS_NORMAL_DIVIDING_UP	-0.242921	0.0354735	-0.0689113	0.113723	-0.102239	0.0675784	0.175601	0.108337
PID_CERAMIDE_PATHWAY	-0.0802884	0.0437144	-0.0888133	0.100486	-0.00748226	0.0514958	0.0221171	0.108334
HERNANDEZ_ABERRANT_MITOSIS_BY_DOCETACEL_2NM_UP	-0.043617	-0.132259	0.0458387	0.0635867	-0.042896	0.0300808	0.234667	0.108283
FONTAINE_PAPILLARY_THYROID_CARCINOMA_UP	0.0365599	0.00602433	-0.0737367	0.0655539	-0.0936117	0.0393114	0.0368756	0.107958
CROONQUIST_NRAS_VS_STROMAL_STIMULATION_DN	-0.0475149	0.0523182	-0.0795254	0.0882002	-0.0370866	0.0303083	0.0194655	0.107955
GUENTHER_GROWTH_SPHERICAL_VS_ADHERENT_DN	-0.0291787	0.0636483	-0.0333426	0.0627667	-0.0793749	0.0289149	0.0642497	0.107948
ADDYA_ERYTHROID_DIFFERENTIATION_BY_HEMIN	-0.0822705	-0.0161638	-0.0528921	0.0641223	-0.0179613	0.0178595	0.0476992	0.10792
MEISSNER_BRAIN_HCP_WITH_H3K4ME3_AND_H3K27ME3	-0.0126391	-0.0188566	-0.0502984	0.0571974	-0.0366227	0.0148726	0.0334564	0.107772
WP_SPHINGOLIPID_PATHWAY	0.0621639	-0.0271209	0.0216285	-0.0194868	0.0167216	-0.0204443	0.00943195	0.107244
REACTOME_LEISHMANIA_INFECTION	-0.0150411	0.0226335	-0.0342695	0.037205	-0.0272587	0.0121738	0.0122168	0.106689
PID_EPHA_FWDPATHWAY	0.0362934	0.0235419	0.0283227	-0.0111392	-0.249781	-0.020611	0.185641	0.106196
ZHANG_RESPONSE_TO_IKK_INHIBITOR_AND_TNF_DN	-0.132112	0.00584265	-0.0482945	0.195664	0.060479	-0.00331831	0.138522	0.105653
BLANCO_MELO_BRONCHIAL_EPITHELIAL_CELLS_INFLUENZA_A_INFECTION_DN	0.0188451	0.0248924	-0.0788879	0.0001002	-0.0694713	0.0515873	-0.035839	0.105596
GAUSSMANN_MLL_AF4_FUSION_TARGETS_A_UP	-0.0264442	-0.00207944	-0.0218311	0.06998	-0.10751	-0.00133241	0.119062	0.10533
MARIADASON_REGULATED_BY_HISTONE_ACETYLATION_DN	0.00147036	-0.0926724	0.0511672	-0.284733	0.0708301	0.0633036	-0.0860945	0.104283
WP_CHEMOKINE_SIGNALING_PATHWAY	-0.0094424	0.0406556	-0.0614118	0.0752589	-0.0788588	0.0239615	0.0430344	0.104186
NIKOLSKY_BREAST_CANCER_8P12_P11_AMPLICON	0.17347	-0.170573	0.184657	-0.223907	0.260887	-0.269505	-0.00811746	0.104148
REACTOME_NON_INTEGRIN_MEMBRANE_ECM_INTERACTIONS	0.095944	0.0344853	-0.127858	0.0551061	-0.227952	-0.00203772	0.0270866	0.104144
REACTOME_INACTIVATION_OF_CSF3_G_CSF_SIGNALING	-0.0928422	-0.00237028	-0.0524993	0.130937	0.0139421	0.0374171	0.0937361	0.103821
REACTOME_RHO_GTPASES_ACTIVATE_FORMINS	-0.0369801	0.0299443	-0.0398888	0.01947	0.0521543	-0.0115267	-0.0427239	0.103624
AMIT_EGF_RESPONSE_480_HELA	0.0310838	-0.0108953	-0.0454801	0.0670952	-0.0167638	0.0118959	0.0224554	0.103603
LANDIS_ERBB2_BREAST_TUMORS_65_UP	0.103165	-0.0347206	-0.0101414	-0.0783093	-0.0965755	0.0568172	0.00959195	0.10352
WP_NAD_METABOLISM_IN_ONCOGENEINDUCED_SENESCENCE_AND_MITOCHONDRIAL_DYSFUNCTIONASSOCIATED_SENESCENCE	-0.089941	-0.0515278	0.0858528	0.0670338	0.349279	-0.101096	0.067595	0.1031
YU_MYC_TARGETS_UP	0.163904	0.0916334	0.0655698	0.087254	0.319561	-0.00922399	-0.0305001	0.103091
REACTOME_NUCLEAR_ENVELOPE_BREAKDOWN	0.0867283	-0.0156146	-0.0094388	-0.0558902	-0.118499	0.0326866	0.028069	0.103077
SAGIV_CD24_TARGETS_DN	0.0933628	0.0169199	-0.3227	0.0312569	-0.107284	0.1715	-0.206921	0.101514
WP_REGULATORY_CIRCUITS_OF_THE_STAT3_SIGNALING_PATHWAY	-0.16277	0.0684561	0.0171155	0.158401	0.0635727	-0.026739	0.162873	0.10149
DARWICHE_PAPILLOMA_RISK_HIGH_UP	-0.000521908	-0.0012753	-0.00608593	0.0478437	0.0194505	-0.0247242	0.0262326	0.101471
WANG_LMO4_TARGETS_DN	-0.0226742	0.0174431	0.000722241	0.00267882	-0.0386869	0.00586984	0.0317123	0.09943
WANG_HCP_PROSTATE_CANCER	-0.103408	0.00385887	-0.061811	0.0544835	-0.0660912	0.0447972	0.0602368	0.0992944
KIM_BIPOLAR_DISORDER_OLIGODENDROCYTE_DENSITY_CORR_DN	0.291795	-0.00276709	-0.0553344	0.323464	-0.148712	-0.31916	0.239346	0.0984993
REACTOME_COOPERATION_OF_PREFOLDIN_AND_TRIC_CCT_IN_ACTIN_AND_TUBULIN_FOLDING	0.00884903	0.00643486	-0.0290814	0.0668809	0.0452536	0.0257652	0.00856997	0.0984061
BIOCARTA_IL2_PATHWAY	-0.0824651	0.0392598	-0.0234531	0.0301538	-0.0120279	0.0375945	0.0315282	0.096961
BONCI_TARGETS_OF_MIR15A_AND_MIR16_1	-0.077915	0.0181129	-0.0432513	0.110807	-0.0215057	0.0209461	0.0866257	0.0968714
REACTOME_HIV_TRANSCRIPTION_ELONGATION	-0.0315361	0.0578078	-0.0430112	0.0743897	-0.0056645	0.0410703	0.0222861	0.0967498
LIN_MELANOMA_COPY_NUMBER_UP	0.0360435	0.00902553	-0.0623448	0.0200129	-0.032052	0.0700669	-0.0197035	0.0966401
HOWLIN_CITED1_TARGETS_1_UP	0.0226197	-0.0211892	0.0801332	-0.166224	-0.104201	-0.000807837	0.0574359	0.096036
REACTOME_RHO_GTPASE_CYCLE	-0.0160483	0.0205724	0.00148363	0.0272206	-0.0135104	-0.0178132	0.0306219	0.0959311
REACTOME_G2_M_CHECKPOINTS	-0.0410244	0.00463419	0.029234	-0.00890505	0.0997175	0.00431882	0.00448471	0.0958979
LINDSTEDT_DENDRITIC_CELL_MATURATION_B	-0.126326	0.0104347	-0.117514	0.0943256	-0.051875	0.0579902	0.0318998	0.0956361
FIGUEROA_AML_METHYLATION_CLUSTER_2_UP	0.0921244	0.0740364	0.102537	-0.099253	-0.258361	-0.15012	0.162662	0.0954666
WP_PRION_DISEASE_PATHWAY	-0.0317749	-0.00326696	-0.0264755	0.0331667	-0.0802973	0.00703837	0.0618818	0.0941098
PID_S1P_S1P2_PATHWAY	-0.0563786	0.00609048	-0.0204643	0.0135913	0.0174722	0.0215958	0.00351145	0.0934088
DUTERTRE_ESTRADIOL_RESPONSE_6HR_DN	0.0814889	0.0401767	-0.0871791	-0.0813041	-0.327329	-0.0381641	0.0174889	0.0931957
REACTOME_RET_SIGNALING	-0.0265345	0.00530249	-0.00900179	0.045963	0.129228	0.0676577	-0.000958982	0.0923086
KAAB_HEART_ATRIUM_VS_VENTRICLE_UP	-0.0127444	0.00576563	-0.0709669	0.0584979	-0.0214627	0.0225868	-0.0055501	0.0918871
FIGUEROA_AML_METHYLATION_CLUSTER_3_DN	-0.0852877	-0.0114598	0.0296103	0.0641303	-0.0392989	0.0130535	0.154659	0.0893671
REACTOME_CYCLIN_A_CDK2_ASSOCIATED_EVENTS_AT_S_PHASE_ENTRY	-0.0388306	0.000893689	0.00548039	0.0201472	0.121775	0.00284286	-0.00942769	0.0891876
BRUECKNER_TARGETS_OF_MIRLET7A3_DN	0.0974926	0.0151015	-0.0570545	0.0614129	-0.0881461	0.0035579	0.0234379	0.0884012
RODWELL_AGING_KIDNEY_NO_BLOOD_UP	0.0280762	0.0192757	-0.0252333	0.0670269	-0.0289899	0.00266729	0.0364051	0.0883239
KHETCHOUMIAN_TRIM24_TARGETS_UP	0.019107	0.0209333	-0.112649	0.101315	-0.0994554	0.0502187	0.0237148	0.087765
PID_TCPTP_PATHWAY	0.0305015	0.0182469	-0.0223159	0.073242	-0.103819	-0.0486563	0.0840651	0.0873009
WP_CHOLESTEROL_METABOLISM_INCLUDES_BOTH_BLOCH_AND_KANDUTSCHRUSSELL_PATHWAYS	0.457963	-0.034888	-0.0659702	-0.121157	0.246373	-0.114212	-0.290967	0.0866473
KEGG_ADHERENS_JUNCTION	-0.0306468	-0.000885863	0.0262618	0.047628	-0.0172012	0.000476385	0.096746	0.0864521
REACTOME_TRANSLATION_OF_SARS_COV_2_STRUCTURAL_PROTEINS	0.00773392	0.0051179	-0.00472465	0.0501359	-0.042548	0.00655432	0.063233	0.0846543
ZWANG_CLASS_2_TRANSIENTLY_INDUCED_BY_EGF	-0.0754287	-0.00197342	-0.101279	0.165053	-0.0104178	0.0629741	0.074891	0.0843869
REACTOME_ASSEMBLY_OF_THE_PRE_REPLICATIVE_COMPLEX	-0.0559369	-0.00539619	0.0171182	0.0308828	0.141044	0.00121213	0.0102782	0.0842945
BIOCARTA_INFLAM_PATHWAY	-0.0599652	0.032399	-0.443752	0.645117	0.0510814	0.21667	0.112127	0.0841002
AMIT_SERUM_RESPONSE_480_MCF10A	-0.163608	0.135784	-0.0355356	0.148719	-0.0510647	0.0335726	0.132237	0.083703
LY_AGING_OLD_DN	-0.0152019	0.0313035	0.00291173	0.0502101	0.109336	-8.57862e-05	-0.00393377	0.0834832
HOUSTIS_ROS	-0.0287151	-0.00220809	-0.0020479	0.0402256	-0.0119565	0.0155549	0.0535286	0.0833578
REACTOME_CELLULAR_RESPONSE_TO_HEAT_STRESS	-0.0123918	-0.00359279	0.00436553	-0.0188366	-0.0248264	0.032106	0.0199845	0.0830714
SENGUPTA_NASOPHARYNGEAL_CARCINOMA_WITH_LMP1_UP	-0.00895566	0.0213343	0.00554517	0.0493245	-0.089262	-0.00276685	0.101373	0.0829643
REACTOME_SIGNALING_BY_NOTCH	-0.0334676	-0.00795017	0.00102531	0.0148224	0.0830304	0.00717759	-0.00375276	0.0826132
MITSIADES_RESPONSE_TO_APLIDIN_DN	0.0227258	0.0375807	0.0252093	0.0347507	-0.0345925	-0.00427629	0.0638726	0.0819514
KANNAN_TP53_TARGETS_DN	0.0585912	0.0476953	-0.0167084	-0.0207441	-0.105116	0.0332738	0.0136565	0.0818365
BERTUCCI_MEDULLARY_VS_DUCTAL_BREAST_CANCER_DN	-0.0207643	0.0389961	-0.0771684	0.0639566	-0.112741	-0.0204703	0.0252027	0.0816808
BIOCARTA_EIF4_PATHWAY	-0.0270753	0.0112769	-0.0197553	0.0626566	-0.0225751	0.00410137	0.05051	0.0813711
REACTOME_CIRCADIAN_CLOCK	-0.0506805	-0.043929	-0.0351726	0.0209709	0.0607672	0.00938522	-0.0116689	0.0807141
VERNELL_RETINOBLASTOMA_PATHWAY_UP	-0.0359087	-0.00373079	0.137075	-0.100534	0.274317	-0.108579	-0.0132939	0.0803079
REACTOME_TRIGLYCERIDE_METABOLISM	0.0586542	-0.0255272	0.0420127	-0.0845558	0.185407	-0.00475558	-0.0764398	0.080108
ZHAN_MULTIPLE_MYELOMA_LB_UP	-0.0523725	0.00909472	0.0163038	-0.0830999	-0.111023	0.0258897	0.0438437	0.078656
PID_INTEGRIN3_PATHWAY	0.0966021	0.0254205	-0.0721833	0.138909	-0.161778	0.0248204	0.112028	0.0784357
REACTOME_NUCLEAR_RECEPTOR_TRANSCRIPTION_PATHWAY	-0.38521	0.0452353	-0.265186	0.270702	-0.0221763	0.260008	0.109204	0.0781998
KYNG_DNA_DAMAGE_BY_GAMMA_AND_UV_RADIATION	-0.0592468	0.0193208	-0.0396688	0.103223	-0.104201	-0.00647589	0.114687	0.0770906
LINDVALL_IMMORTALIZED_BY_TERT_UP	-0.0212582	0.0232361	-0.0781144	0.0668779	-0.132206	0.0226496	0.0503575	0.0770705
REACTOME_ORC1_REMOVAL_FROM_CHROMATIN	-0.0634556	-0.00509509	0.0140226	0.0365883	0.135982	0.00682354	0.0137807	0.0763551
LU_TUMOR_ANGIOGENESIS_UP	0.135035	-0.0593591	-0.100187	0.150853	-0.12446	-0.0462761	0.0808937	0.0757304
PID_TCR_PATHWAY	0.035181	0.064369	-0.0626978	0.0714073	-0.0419648	0.034923	-0.00390982	0.0757097
SHIN_B_CELL_LYMPHOMA_CLUSTER_8	-0.0633522	0.0522961	-0.096987	0.0878429	-0.111333	0.0469855	0.0400256	0.0751726
YAGI_AML_FAB_MARKERS	-0.0115148	0.0291385	-0.0338784	0.0243504	-0.0264042	0.015637	-0.0041428	0.0748248
MARSON_BOUND_BY_FOXP3_STIMULATED	-0.00841256	-0.0053421	-0.0215486	0.0456832	-0.0289685	0.0104603	0.0383435	0.0741751
WP_CYTOKINES_AND_INFLAMMATORY_RESPONSE	-0.0472124	0.0170823	-0.419838	0.606067	-0.00382983	0.238983	0.122771	0.0731958
TANAKA_METHYLATED_IN_ESOPHAGEAL_CARCINOMA	-0.126742	0.0587507	0.033705	-0.0173611	-0.0118121	-0.0696174	0.0473005	0.0731082
MONNIER_POSTRADIATION_TUMOR_ESCAPE_DN	-0.0233026	-0.00057548	-0.0553459	0.0797315	-0.0221062	0.020236	0.0299845	0.0723145
REACTOME_FATTY_ACID_METABOLISM	0.118042	-0.0190251	-0.0182623	0.0113049	-0.0284136	-0.0192303	-0.00415317	0.0715929
ACEVEDO_LIVER_CANCER_DN	-0.0225327	-0.00257131	-0.0307139	0.0255881	-0.00198791	0.00763424	-0.00194109	0.0707324
REACTOME_TAK1_ACTIVATES_NFKB_BY_PHOSPHORYLATION_AND_ACTIVATION_OF_IKKS_COMPLEX	-0.104442	-0.00857374	-0.0391492	0.041005	0.0259861	0.0240602	0.018561	0.0696369
CAFFAREL_RESPONSE_TO_THC_24HR_5_UP	-0.0273056	0.0120709	-0.0160429	0.0404722	0.0289329	0.0326867	0.0129045	0.0693048
SAKAI_TUMOR_INFILTRATING_MONOCYTES_DN	0.000264338	0.00613927	0.0106166	0.0269453	0.0579281	-0.00638582	0.00727611	0.0692887
FULCHER_INFLAMMATORY_RESPONSE_LECTIN_VS_LPS_DN	-0.0667545	-0.00331448	-0.0631769	0.030253	-0.0936022	0.0325325	0.0340101	0.0691835
SENESE_HDAC1_AND_HDAC2_TARGETS_DN	0.143117	0.0494001	-0.139824	0.108185	-0.139396	0.013048	-0.0217505	0.0685314
VANDESLUIS_COMMD1_TARGETS_GROUP_3_UP	0.0632289	-0.0306827	-0.0218723	0.0813833	0.0634643	-0.0374457	0.0107763	0.0683139
REACTOME_TRNA_PROCESSING_IN_THE_NUCLEUS	-0.0276205	-0.00479073	0.0205771	-0.0695762	-0.0628625	0.109286	0.0474562	0.0679997
WP_REGULATION_OF_APOPTOSIS_BY_PARATHYROID_HORMONERELATED_PROTEIN	0.0393619	0.000979849	-0.0955354	0.166585	0.0106974	0.0967179	0.0425748	0.0672897
REACTOME_DOWNREGULATION_OF_ERBB2_SIGNALING	-0.09796	0.0138041	-0.00514613	0.0402782	-0.0249805	0.0331298	0.0742501	0.0668738
PHONG_TNF_TARGETS_UP	-0.140878	-0.00338593	-0.116133	0.0664829	-0.00218156	0.0530396	-0.0172921	0.0667437
REACTOME_REGULATION_OF_EXPRESSION_OF_SLITS_AND_ROBOS	-0.0181881	0.000557578	0.000585005	0.00997466	0.0396196	0.00376246	-0.00163424	0.0666051
RIZKI_TUMOR_INVASIVENESS_2D_DN	-0.0498423	0.0180618	0.022177	0.00443854	0.0137307	-0.0313618	0.0294178	0.0665741
LEE_LIVER_CANCER_CIPROFIBRATE_UP	0.127383	-0.0499753	-0.115844	0.254817	-0.0819505	0.00916653	0.128546	0.065654
BRUINS_UVC_RESPONSE_VIA_TP53_GROUP_B	-0.0193448	0.00849655	-0.0751122	0.0620633	-0.0949246	0.0345785	0.0309869	0.0645356
FARMER_BREAST_CANCER_CLUSTER_2	0.279705	0.179878	0.218915	-0.129174	0.0980349	-0.481219	-0.0256603	0.0643051
BROWNE_HCMV_INFECTION_12HR_DN	-0.0341869	0.0229528	-0.103851	0.0275275	-0.0963973	0.0719917	-0.019862	0.0642986
SMID_BREAST_CANCER_ERBB2_UP	0.010911	-0.0442945	0.0437637	-0.0549869	0.00653396	0.011149	0.0307484	0.0640264
REACTOME_SEMAPHORIN_INTERACTIONS	-0.00979059	0.0236432	-0.0262698	0.0497808	-0.0834002	0.00651589	0.0560984	0.0634281
KEGG_FOCAL_ADHESION	0.0356757	0.0269028	-0.0417743	0.0758173	-0.0895732	0.00696467	0.0525958	0.0629516
REACTOME_CARDIAC_CONDUCTION	0.108531	-0.0538349	-0.0684415	0.0778694	-0.0271256	0.00891647	0.00881269	0.0628789
KEGG_SELENOAMINO_ACID_METABOLISM	-0.0168496	-0.0919371	0.111456	-1.66797	-0.466891	-0.0163259	-0.680139	0.0619894
WOOD_EBV_EBNA1_TARGETS_DN	0.00936713	-0.00020198	0.0102975	0.128868	-0.0702145	-0.0141689	0.158944	0.061869
LI_CISPLATIN_RESISTANCE_DN	-0.0763291	-0.161537	0.029901	0.0675567	0.239173	-0.0650242	0.0642228	0.0617306
SMIRNOV_RESPONSE_TO_IR_2HR_UP	-0.206493	-0.0589883	-0.106314	0.0739973	-0.00609687	0.0630297	0.0406244	0.0614972
WANG_LSD1_TARGETS_UP	0.0835747	-0.0163628	-0.108925	0.168671	-0.00233611	0.0268161	0.01894	0.0612976
SWEET_LUNG_CANCER_KRAS_DN	-0.0583518	0.0292735	-0.0924209	0.0904573	-0.109731	0.0269954	0.0431341	0.0605707
PETRETTO_HEART_MASS_QTL_CIS_UP	-0.0248005	0.0471553	-0.119381	0.0800118	-0.246188	0.069811	0.0779124	0.0604806
REACTOME_METABOLISM_OF_POLYAMINES	-0.0732457	-0.00802358	0.00600972	0.0229542	0.116693	0.0107573	0.00234398	0.0598358
GOZGIT_ESR1_TARGETS_DN	-0.0367441	0.00137296	-0.0505604	0.0549014	-0.100635	0.0340855	0.0610105	0.0584794
REACTOME_REGULATION_OF_TP53_ACTIVITY_THROUGH_ACETYLATION	-0.135124	0.0153147	0.0278135	0.0031855	0.134079	0.025919	0.0169785	0.0581285
SENESE_HDAC2_TARGETS_DN	0.144973	0.0422832	-0.241905	0.111272	-0.222189	0.0361923	-0.0825962	0.057741
CUI_TCF21_TARGETS_UP	-0.0838481	0.000509161	0.0487397	-0.429787	-0.0538212	-0.00837624	-0.179787	0.0575267
NIKOLSKY_BREAST_CANCER_16Q24_AMPLICON	0.0706326	-0.0458519	0.0578571	-0.0529297	0.0771436	-0.0944161	-0.00940585	0.0570967
REN_BOUND_BY_E2F	0.0147284	0.0730653	0.081771	-0.0200211	0.224288	0.012653	-0.0350168	0.0568252
LIU_SOX4_TARGETS_DN	-0.0316002	-0.00460913	0.023593	0.0217807	0.0188374	-0.0166003	0.0456555	0.0556622
REACTOME_SIGNALING_BY_FGFR1_IN_DISEASE	0.147175	0.0536841	-0.0693685	-0.028339	-0.281728	-0.00250584	0.0188083	0.0545294
YAGI_AML_WITH_INV_16_TRANSLOCATION	-0.0178578	0.0032108	-0.0216955	0.0428199	-0.0213103	0.0187513	0.0297437	0.0541458
DUTERTRE_ESTRADIOL_RESPONSE_24HR_DN	-0.0145912	0.008354	-0.0771915	0.0543154	-0.121683	0.0226025	0.0312253	0.0540602
REACTOME_ABC_FAMILY_PROTEINS_MEDIATED_TRANSPORT	-0.0455466	-0.0100111	0.011974	0.0229639	0.125341	0.00564517	-0.00331936	0.0540138
TURASHVILI_BREAST_DUCTAL_CARCINOMA_VS_LOBULAR_NORMAL_UP	0.0483409	0.0266739	-0.0125023	0.0314272	-0.143698	-0.014994	0.0735807	0.0539601
YIH_RESPONSE_TO_ARSENITE_C1	-0.0864255	0.0433379	-0.00123042	0.0586361	-0.0372177	0.0606912	0.0885218	0.0530348
REACTOME_CYTOSOLIC_SENSORS_OF_PATHOGEN_ASSOCIATED_DNA	-0.0540834	-0.0207012	-0.0314831	0.0635233	-0.00898631	0.0446562	0.0529854	0.0527385
BROWNE_HCMV_INFECTION_30MIN_DN	-0.0608346	0.0523637	-0.0380268	0.173823	-0.120008	-0.004931	0.163841	0.0524688
ICHIBA_GRAFT_VERSUS_HOST_DISEASE_35D_UP	-0.00436644	0.0313282	-0.0409113	0.0347241	-0.0734004	0.0188958	0.0178481	0.0524464
KINSEY_TARGETS_OF_EWSR1_FLII_FUSION_DN	-0.0780491	0.0285914	-0.0862518	0.0510789	-0.1155	0.0238619	0.0228797	0.0519207
WP_PHOTODYNAMIC_THERAPYINDUCED_AP1_SURVIVAL_SIGNALING	-0.0517491	-0.00606302	-0.0587248	0.103742	-0.00279634	0.0371604	0.0443901	0.0514178
REACTOME_ANTI_INFLAMMATORY_RESPONSE_FAVOURING_LEISHMANIA_PARASITE_INFECTION	-0.0173209	0.0316505	-0.0689951	0.135876	-0.0377332	0.0236537	0.053043	0.0509958
FLECHNER_PBL_KIDNEY_TRANSPLANT_REJECTED_VS_OK_DN	-0.0135405	0.00181524	0.0246221	-0.0124217	-0.00256827	-0.01572	0.0231163	0.0500151
BIOCARTA_CERAMIDE_PATHWAY	-0.177932	0.0639011	-0.077402	0.127249	0.00416295	0.0561686	0.0530607	0.0499666
NAGASHIMA_EGF_SIGNALING_UP	-0.205823	0.0166616	-0.127653	0.072154	-0.0151478	0.0811347	-0.00818698	0.0498924
CHESLER_BRAIN_HIGHEST_GENETIC_VARIANCE	0.0352844	0.00630864	-0.0408792	-0.00805513	-0.035991	0.0162338	-0.0350361	0.0498661
WP_HEPATITIS_B_INFECTION	-0.0506356	0.000482254	-0.0245568	0.048644	0.0204369	0.0143795	0.0185071	0.0486142
REACTOME_HEDGEHOG_LIGAND_BIOGENESIS	-0.0482495	-0.00789872	0.00891911	0.0212595	0.126852	0.00140132	-0.0106055	0.0485395
PELLICCIOTTA_HDAC_IN_ANTIGEN_PRESENTATION_DN	-0.0291265	0.0178281	0.00842997	0.0347507	0.0764125	-0.00117534	0.00509644	0.0478293
SCHAEFFER_SOX9_TARGETS_IN_PROSTATE_DEVELOPMENT_DN	-0.034018	0.00587217	0.00589838	0.0598251	-0.0203258	-0.0375233	0.0683952	0.0469746
NAKAMURA_METASTASIS_MODEL_UP	-0.186643	0.00386277	-0.125469	0.166452	0.087935	0.0372983	0.00785177	0.0448585
BURTON_ADIPOGENESIS_1	-0.146942	0.0229686	-0.192752	0.21098	-0.0306697	0.12247	0.0257747	0.0444312
REACTOME_INTRACELLULAR_SIGNALING_BY_SECOND_MESSENGERS	-0.0567152	-0.0070588	-0.0171006	0.0403943	0.0817556	0.00991123	-0.00412388	0.0441636
COULOUARN_TEMPORAL_TGFB1_SIGNATURE_UP	-0.0105462	0.0181892	-0.0818069	0.101032	-0.105981	0.0542473	0.0537983	0.0441182
DARWICHE_PAPILLOMA_RISK_LOW_DN	-0.063105	0.0135709	-0.0300697	0.0493234	-0.0440723	-0.00773146	0.0395451	0.0439206
PLASARI_TGFB1_SIGNALING_VIA_NFIC_10HR_DN	-0.341844	0.0211177	-0.120196	-0.227468	-0.21226	0.342262	-0.0337877	0.0439184
REACTOME_REGULATION_OF_HSF1_MEDIATED_HEAT_SHOCK_RESPONSE	-0.0363034	0.00179273	-0.00285281	-0.0196694	-0.0483252	0.0341708	0.0243683	0.0434847
HOELZEL_NF1_TARGETS_UP	0.0235184	-0.0447526	-0.0768937	0.123913	-0.0725027	0.00616592	0.0657838	0.0432812
MATZUK_SPERMATID_DIFFERENTIATION	-0.0414303	0.0381631	-0.147112	0.143176	-0.129393	-0.0374567	0.0109061	0.0432507
REACTOME_RNA_POLYMERASE_I_TRANSCRIPTION_TERMINATION	-0.12159	0.0427881	-0.00424034	0.0456251	0.0519335	0.0367526	0.0330439	0.0430831
KEGG_PROTEIN_EXPORT	0.102944	0.0148283	-0.0588973	-0.0114539	-0.0945618	0.083511	-0.0281632	0.0429389
REACTOME_TRANSPORT_OF_INORGANIC_CATIONS_ANIONS_AND_AMINO_ACIDS_OLIGOPEPTIDES	-0.0140465	0.0211058	-0.0923853	0.0604686	-0.0106017	0.0397629	-0.0421222	0.0421324
REACTOME_APC_C_MEDIATED_DEGRADATION_OF_CELL_CYCLE_PROTEINS	-0.0563826	-0.00466635	-0.000824949	0.0191337	0.116843	0.00774701	-0.0184288	0.0421131
BLANCO_MELO_COVID19_SARS_COV_2_INFECTION_A594_ACE2_EXPRESSING_CELLS_RUXOLITINIB_UP	-0.173613	0.0206681	-0.0948503	0.127337	-0.0456388	0.0576528	0.068434	0.0419927
FARMER_BREAST_CANCER_APOCRINE_VS_LUMINAL	0.0787289	-0.0266388	-0.0276848	0.0638406	-0.010443	0.00411922	0.0220984	0.0419165
EGUCHI_CELL_CYCLE_RB1_TARGETS	0.184507	0.207606	0.232239	0.0804937	0.367939	-0.153316	0.0369844	0.0412467
KAUFFMANN_MELANOMA_RELAPSE_UP	0.123808	0.128079	0.0636207	-0.00853147	0.175757	-0.0112621	-0.0754624	0.0406771
WEINMANN_ADAPTATION_TO_HYPOXIA_UP	0.0467093	-0.0145974	-0.00421885	0.168182	-0.146532	-0.0198688	0.203211	0.0395562
VALK_AML_WITH_EVI1	-0.111121	0.0671421	-0.112895	0.0869216	-0.277681	-0.0220634	0.091364	0.038791
REACTOME_RESPONSE_OF_MTB_TO_PHAGOCYTOSIS	-0.0557411	0.00997256	0.0115839	0.03245	0.0434429	-0.0196117	0.0269043	0.0382041
REACTOME_DOWNSTREAM_SIGNALING_EVENTS_OF_B_CELL_RECEPTOR_BCR	-0.0588064	0.000702106	-0.00793858	0.0245327	0.0820052	-0.000562346	-0.0114136	0.0365697
HELLER_HDAC_TARGETS_UP	-0.0417597	0.01604	-0.0373759	0.0282018	-0.047592	0.00256317	0.0104753	0.0358237
SWEET_LUNG_CANCER_KRAS_UP	0.00339726	-0.000772951	-0.0330902	0.046163	-0.0138246	0.0155856	0.00964006	0.0355612
SEKI_INFLAMMATORY_RESPONSE_LPS_UP	-0.193471	0.0561318	-0.132831	0.215552	-0.107514	0.0898985	0.12265	0.0352192
KEGG_AXON_GUIDANCE	0.0413089	0.0164185	-0.00463848	0.0316543	-0.103098	-0.0162573	0.0590207	0.0345895
YAO_TEMPORAL_RESPONSE_TO_PROGESTERONE_CLUSTER_12	0.0329002	0.0325301	-0.0327897	0.00906024	0.0290392	-0.00883212	-0.0588602	0.0327238
WP_FOCAL_ADHESION	0.0390974	0.0304252	-0.0380293	0.0857431	-0.0884399	0.00346204	0.053665	0.0326431
PID_GMCSF_PATHWAY	-0.0581123	0.015592	-0.0487824	0.0848793	-0.122349	0.0860599	0.100411	0.0304344
ZHANG_BREAST_CANCER_PROGENITORS_DN	0.0111265	0.0267295	-0.0237701	0.0633531	-0.0544875	0.0419403	0.047667	0.0300892
TAKEDA_TARGETS_OF_NUP98_HOXA9_FUSION_16D_DN	0.0601632	0.00613076	-0.0601062	0.0382314	-0.164692	0.0237551	0.039445	0.0289931
REACTOME_BASE_EXCISION_REPAIR	0.0191925	0.02539	-0.0557516	-0.103953	0.450973	-0.0527451	-0.349306	0.0288989
STEIN_ESRRA_TARGETS_RESPONSIVE_TO_ESTROGEN_UP	-0.100941	-0.00236632	-0.0580495	0.111976	0.0329166	0.0917472	0.0488381	0.0272295
ZHANG_TARGETS_OF_EWSR1_FLI1_FUSION	-0.0533191	-0.0113478	-0.0501377	0.0897882	-0.0468619	0.0386556	0.0615585	0.0272111
REACTOME_DEUBIQUITINATION	-0.0521249	0.0013911	0.000988763	0.012606	0.0836548	0.0132138	-0.0123634	0.026596
WP_REGULATION_OF_TOLLLIKE_RECEPTOR_SIGNALING_PATHWAY	-0.133353	0.0269283	-0.0810366	0.0324915	-0.0598058	0.028955	-0.00679928	0.0264937
PID_IFNG_PATHWAY	-0.0919991	0.0753408	-0.210175	0.258902	-0.154756	0.108556	0.0606639	0.0259278
REACTOME_NEGATIVE_REGULATION_OF_MAPK_PATHWAY	-0.0812743	-0.0229349	0.024306	-0.0468057	0.0358044	0.0383365	0.01245	0.0259104
REACTOME_NEGATIVE_REGULATION_OF_NOTCH4_SIGNALING	-0.0523541	-2.01149e-05	-0.000636091	0.035779	0.112561	0.0171549	-0.00903041	0.0246484
HOLLEMAN_ASPARAGINASE_RESISTANCE_B_ALL_UP	0.0253618	-0.0103681	0.0098626	-0.00896992	-0.0245174	0.00193719	0.0167239	0.0244959
REACTOME_SIGNALING_BY_HEDGEHOG	-0.0616924	-0.00155472	0.000100497	0.0150578	0.092161	0.008138	-0.0134315	0.0238732
REACTOME_SIGNALING_BY_ROBO_RECEPTORS	-0.0128352	0.00118074	0.00284821	0.00449141	0.0336502	0.00252865	-0.00545376	0.0237642
DAVICIONI_TARGETS_OF_PAX_FOXO1_FUSIONS_UP	-0.013469	0.0121273	-0.0762116	0.0699264	-0.0787949	0.0450732	0.016262	0.0235564
PID_SYNDECAN_4_PATHWAY	0.0893241	-0.00597469	-0.021905	0.0824983	-0.0453896	-0.0186313	0.0437218	0.0232401
KEGG_BUTANOATE_METABOLISM	-0.021638	0.0756959	0.0014494	-0.0873017	0.0635025	-0.0324328	-0.113533	0.0231541
VANHARANTA_UTERINE_FIBROID_DN	-0.180411	-0.00482849	-0.137767	0.151015	-0.0535649	0.120624	0.0558166	0.0230322
REACTOME_MEIOTIC_SYNAPSIS	-0.109999	0.039074	0.0345859	0.0385798	-0.102174	0.0137309	0.137949	0.0225964
REACTOME_DISORDERS_OF_TRANSMEMBRANE_TRANSPORTERS	-0.0417709	-0.0079378	0.00839751	0.00998679	0.0943167	0.00474781	-0.0122217	0.0220251
REACTOME_TP53_REGULATES_TRANSCRIPTION_OF_DNA_REPAIR_GENES	-0.0471728	0.0437916	-0.0398295	0.0642232	0.0275447	0.0425716	-0.00431076	0.0214312
LIAO_METASTASIS	0.00500714	0.0264789	-0.0125742	-0.00933399	-0.049973	-0.00867403	-0.00648377	0.0210033
BOSCO_TH1_CYTOTOXIC_MODULE	-0.0269578	0.0395708	0.248132	-0.170296	-0.161117	-0.226251	0.201871	0.0205927
RHODES_CANCER_META_SIGNATURE	-0.000438709	0.0243591	-0.010876	0.0519885	0.0585461	0.00618933	-0.00675266	0.0205812
LU_EZH2_TARGETS_DN	0.0261675	0.0203828	-0.0241394	0.0504923	-0.104898	-0.0123988	0.0510603	0.020268
SUNG_METASTASIS_STROMA_DN	-0.107445	0.0290257	0.0611025	0.0449156	0.0704398	0.00429941	0.0875126	0.0201687
REACTOME_SEPARATION_OF_SISTER_CHROMATIDS	-0.0284725	-0.00111043	0.0199841	-0.00044882	0.0863648	0.00429561	-0.0091544	0.0199358
WP_ENDOTHELIN_PATHWAYS	-0.006844	0.0176891	-0.0355278	0.0765555	0.000589827	0.0126304	0.0168465	0.0198739
WP_16P112_PROXIMAL_DELETION_SYNDROME	-0.0678382	0.000282122	0.00521343	0.0316349	0.0248917	0.00614113	0.0357169	0.0198699
REACTOME_SIGNALING_BY_VEGF	0.0243977	0.0315504	-0.0154861	0.035666	-0.0839122	-0.00684957	0.0359427	0.0190056
DAVICIONI_MOLECULAR_ARMS_VS_ERMS_UP	-0.0013119	0.00285168	0.00897268	0.0184188	-0.00830739	-0.023982	0.0243171	0.0189945
WONG_ENDMETRIUM_CANCER_DN	0.150437	-0.0428336	-0.0126375	0.0108049	0.0908936	-0.130936	-0.0820369	0.0183805
SMIRNOV_RESPONSE_TO_IR_2HR_DN	-0.164738	-0.00993486	-0.0493945	-0.0661084	-0.0788885	0.00202309	-0.0232628	0.0180233
AMIT_SERUM_RESPONSE_60_MCF10A	-0.0568647	0.0235852	-0.118159	0.140768	-0.103012	0.103889	0.0500616	0.0167827
WP_TOLLLIKE_RECEPTOR_SIGNALING_RELATED_TO_MYD88	-0.844776	-0.0702906	-0.152955	0.0260675	-0.0689756	0.0305292	0.112245	0.016235
KEGG_CYSTEINE_AND_METHIONINE_METABOLISM	-0.0321655	-0.0212387	0.084651	0.0257214	0.145345	-0.0587926	0.0533925	0.0160228
WP_PYRIMIDINE_METABOLISM	0.0736692	0.013084	0.0086107	-0.0210928	0.212234	0.039086	-0.115061	0.0156683
REACTOME_SIGNALING_BY_CSF3_G_CSF	-0.0700769	-0.00237889	-0.0400654	0.121325	0.00858063	0.04067	0.0676418	0.0155327
YAO_HOXA10_TARGETS_VIA_PROGESTERONE_UP	-0.111378	-0.0223429	-0.0778702	0.186154	-0.0481927	0.0306746	0.117268	0.0154106
WANG_METHYLATED_IN_BREAST_CANCER	-0.153274	0.0237374	-0.0956585	0.111795	-0.0593926	0.0384891	0.0407746	0.0151477
REACTOME_CELL_CYCLE_CHECKPOINTS	-0.0242222	0.0102729	0.0453133	-0.0202982	0.10047	-0.000984546	-0.00815219	0.0148054
VALK_AML_CLUSTER_10	-0.0769616	0.0964213	-0.119038	0.0128419	-0.308765	-0.0655083	0.00480812	0.0147833
REACTOME_SIGNALING_BY_EGFR	-0.0198761	-0.0248208	-0.0536828	0.0635841	0.000999672	0.0517447	0.0101861	0.0133373
REACTOME_ELASTIC_FIBRE_FORMATION	-0.0632035	0.0492749	-0.136865	0.165721	-0.159358	-0.00299225	0.0478099	0.0128314
KEGG_BETA_ALANINE_METABOLISM	-0.0666005	0.0363046	-0.0309417	0.0134325	0.124741	-0.0581524	-0.0895286	0.0124646
GAZIN_EPIGENETIC_SILENCING_BY_KRAS	0.0015604	-0.00942929	0.354833	-0.505592	-0.135511	-0.106778	0.090181	0.012379
GINESTIER_BREAST_CANCER_20Q13_AMPLIFICATION_DN	-0.0664218	7.46209e-05	0.0247218	0.0373489	0.0441457	-0.0199646	0.0470408	0.0119646
LEE_AGING_CEREBELLUM_DN	-0.0455195	0.0534782	-0.0511655	0.17831	0.0313363	-0.0311611	0.0492182	0.0117249
REACTOME_RHOV_GTPASE_CYCLE	0.00649316	0.0612221	0.0071388	0.0514378	-0.165012	-0.0279269	0.103049	0.0115078
REACTOME_PRE_NOTCH_EXPRESSION_AND_PROCESSING	-0.0446616	-0.00366133	-0.0183705	0.0493672	-0.018313	0.0232241	0.0411506	0.0112357
MEBARKI_HCC_PROGENITOR_WNT_UP_BLOCKED_BY_FZD8CRD	0.0424381	0.0383566	-0.0886222	0.0267493	-0.251428	-0.00979823	0.0223083	0.0101887
KEGG_ECM_RECEPTOR_INTERACTION	0.117568	0.0288137	-0.070174	0.103905	-0.182922	-0.0325321	0.0502784	0.0097446
REACTOME_RESOLUTION_OF_AP_SITES_VIA_THE_MULTIPLE_NUCLEOTIDE_PATCH_REPLACEMENT_PATHWAY	0.0640459	0.0548788	-0.0493345	-0.0466829	0.52462	-0.0236701	-0.369064	0.00973276
REACTOME_RHOU_GTPASE_CYCLE	-0.0337022	0.0773197	-0.0153931	0.0569426	-0.192093	0.00356949	0.102699	0.00893165
REACTOME_HIV_ELONGATION_ARREST_AND_RECOVERY	-0.017805	0.0711127	-0.0526696	0.0664019	-0.0273407	0.0406943	-0.00895126	0.00826514
GRAESSMANN_RESPONSE_TO_MC_AND_DOXORUBICIN_UP	0.0310699	-0.00598007	-0.0293779	-0.0421978	-0.0422854	0.0289331	-0.0423334	0.00800187
KAUFFMANN_DNA_REPAIR_GENES	0.00826973	0.0458695	0.0626693	0.0241144	0.0410185	-0.0112167	0.0501087	0.00768648
RICKMAN_TUMOR_DIFFERENTIATED_WELL_VS_POORLY_UP	-0.00139757	-0.0029559	0.0216552	0.0177656	0.0141402	-0.0144599	0.0300651	0.00705934
CROMER_TUMORIGENESIS_DN	0.117336	-0.021075	-0.223578	0.0801971	-0.269517	0.0956505	-0.0590049	0.00688786
TSAI_RESPONSE_TO_RADIATION_THERAPY	-0.0643368	-0.000445314	-0.0182331	0.0238915	-0.0500448	-0.0104186	0.0343591	0.00633468
REACTOME_AMINO_ACIDS_REGULATE_MTORC1	-0.0310339	-0.0177817	-0.0691606	-0.0156041	0.0544357	0.0384352	-0.0952388	0.00557347
WP_PROTEASOME_DEGRADATION	-0.0531776	-0.00603277	0.000446734	0.0235134	0.111578	-0.00835432	-0.0228389	0.00547566
REACTOME_TRANSCRIPTIONAL_REGULATION_BY_RUNX2	-0.0531904	0.00105855	-0.000696176	0.0270203	0.0736221	0.0102306	-0.00277541	0.00538356
REACTOME_MITOTIC_METAPHASE_AND_ANAPHASE	-0.01186	0.00504399	0.0227396	-0.00147243	0.0829494	0.00633095	-0.0130868	0.00400967
NIKOLSKY_BREAST_CANCER_20Q11_AMPLICON	-0.13487	0.0675467	-0.0508216	0.0602539	0.0385992	0.00768495	-0.0234534	0.0037973
BLALOCK_ALZHEIMERS_DISEASE_UP	-0.0169988	0.0103327	0.00189581	0.0186565	-0.0528984	0.0043568	0.0428072	0.00360514
DAZARD_RESPONSE_TO_UV_NHEK_UP	-0.0650688	0.0119077	-0.0358746	0.0336537	-0.0167056	0.036122	0.00900107	0.00324507
[truncated: 1,748 more rows]

## Sheet: Gene_correlation
# Values are mean log fold change in gene expression (clone compared to bulk tumour) across all vehicle experiments
	Clone 238	Clone 350	Clone 473	Clone 537	Clone 679	Clone 684	Clones 93&264&439	Correlation
logFC_abundance_JQ1_vs_Vehicle	0.0338076	0.296072	-2.63207	-1.86127	0.572782	-0.730807	1.60002	1
Scara3	0.0134074	0.00985946	-0.0664865	-0.0624852	0.0160221	-0.0238274	0.0304528	0.973487
Eny2	0.0128998	0.0685832	-0.210063	-0.0548058	0.108069	-0.0368371	0.186394	0.968019
St7l	0.0146066	0.0229579	-0.0313094	-0.0325616	0.0307202	-0.00926432	0.083	0.950939
4933434E20Rik	-0.0189692	0.0219356	-0.0934294	-0.0548749	0.0684322	0.00752364	0.108646	0.946454
Cln5	0.0123835	0.00159986	-0.0297368	-0.015207	0.00611463	0.00109448	0.0364597	0.946136
Camk2d	0.0621296	0.0100265	-0.144381	-0.0291375	0.068638	-0.00182339	0.168599	0.943507
Psmc6	-0.0026698	0.00648078	-0.0796734	-0.0404328	0.0334834	0.0172284	0.0526757	0.941309
Abi1	-0.0162179	0.0255747	-0.112542	-0.0601984	-0.0187539	-0.0225308	0.0517297	0.939825
Depdc1a	0.0432176	0.00733309	-0.0624056	-0.0520794	0.0213963	-0.0163197	0.0466818	0.937626
Apbb1ip	0.018104	-0.0270171	-0.175371	-0.0840609	0.0740145	-0.0195298	0.211361	0.937352
Pip5k1a	-0.0187116	0.0160134	-0.068576	-0.0956121	0.0120278	-0.0419872	0.0726355	0.936912
Abcb1b	0.0294455	0.01394	-0.0802481	-0.0353432	0.103203	-0.00735517	0.0981707	0.936172
Samd8	0.0147603	0.0150642	-0.037606	-0.0372877	0.0141513	0.00542421	0.0217274	0.935882
Mtss1l	-0.0207049	-0.00583736	-0.0396203	-0.0310053	-0.0096099	-0.0221063	0.0194532	0.935613
Cyp2u1	0.00858561	0.00567985	-0.0109023	-0.00576288	0.0234396	0.00670972	0.035344	0.933516
Pofut1	-0.00178176	0.0109165	-0.0166003	-0.0109458	0.0249516	-0.000589918	0.0301594	0.932275
Akt1	0.0255382	0.0332313	-0.117749	-0.0615909	0.171526	-0.0077879	0.152142	0.928294
Pbrm1	-0.0275778	0.0551116	-0.121539	-0.0677231	-0.00402801	-0.0208837	0.104799	0.928279
Mvb12b	0.008014	0.0109707	-0.0215633	-0.00705214	0.00353497	-0.0110949	0.0250921	0.92699
Acadm	0.0199676	0.0213456	-0.0719026	-0.0215402	0.000922461	-0.029544	0.0610517	0.925658
Elp3	0.0159922	0.0126517	-0.0293226	-0.0184808	0.0466341	-0.0186927	0.0559454	0.925362
Ap2a2	-0.0173819	0.0341745	-0.0488191	-0.0366675	0.0501443	-0.0131909	0.0743267	0.924821
Med4	-0.0125333	0.0373271	-0.0528566	-0.0158309	0.0361475	-0.00266305	0.0582834	0.923847
Atp5f1	0.0508874	0.0415987	-0.20794	-0.0880045	0.173727	0.0160277	0.111281	0.922909
Nectin3	-0.00221039	0.0276802	-0.0652285	-0.0341677	0.0802167	-0.0270676	0.0738781	0.921076
Ptges3l	0.0099575	0.00807805	-0.00949115	-0.0112114	0.00298886	0.00418451	0.0167891	0.920289
Upf2	-0.0347186	0.00912904	-0.0740647	-0.0528733	-0.0137422	-0.0189663	0.0178535	0.919533
Cenpe	0.0478433	0.0199853	-0.155764	-0.22095	0.0450848	-0.113522	0.0899831	0.917446
Smc4	-0.0063304	0.0247195	-0.135012	-0.0864763	0.103358	-0.109508	0.202285	0.915091
Ccnk	0.0168766	-0.00529213	-0.0760671	-0.0147298	0.0575014	-0.0172459	0.102355	0.91279
Magi3	-0.0041841	0.0223635	-0.0455127	-0.0188059	0.0295133	-0.0343359	0.0548189	0.912653
Hax1	-0.0352959	0.0479028	-0.0958827	-0.0499741	0.00645957	-0.0242014	0.0719874	0.912497
Ptpn21	-0.00519582	0.00944956	-0.0284218	-0.020934	0.00128695	-0.0255829	0.0209598	0.911645
Adsl	0.021457	0.0401782	-0.0516624	-0.0594808	-0.00324586	-0.00202634	0.0936086	0.911128
Ttc37	0.00166885	0.0136627	-0.00722873	-0.00661922	0.0204134	-0.00149067	0.0208982	0.910193
Lmo7	-0.00318153	0.00118826	-0.0186768	-0.0231753	0.021722	-0.0115383	0.0251913	0.910109
Ptgr2	-0.0182267	0.027835	-0.0619038	-0.036833	0.0773695	-0.0191234	0.0871612	0.909828
Otud1	-0.0122825	0.0230183	-0.0304174	-0.0444501	0.0142632	-0.00249584	0.0512721	0.908174
Pdzrn3	0.0654953	0.0253556	-0.0306303	-0.010258	0.0370047	-0.00413361	0.0981613	0.907739
Taf13	0.0159815	0.00566247	-0.0409818	-0.00577726	0.0174703	-0.0118919	0.0218837	0.905195
Rgl2	-0.000971001	0.0104325	-0.0268425	-0.0503142	0.00274712	-0.0143243	0.0386298	0.904865
Ppp2r5c	-0.014459	0.00166252	-0.07138	-0.119716	0.0268082	-0.0697832	0.0913409	0.904791
Gm10282	0.00718151	0.00370198	-0.00471118	-0.00499341	0.00279247	-0.00258713	0.00878961	0.903125
Fam96a	-0.0142379	0.0151048	-0.0522017	-0.0312621	0.0626614	-0.0228951	0.0664999	0.902639
Cct5	0.0671906	0.0661515	-0.18054	-0.00269947	0.037245	0.0452316	0.17879	0.90219
Eif2a	0.0842909	-0.00923599	-0.12726	-0.0648011	0.0690087	0.0621778	0.195231	0.902176
Nsf	0.0089872	-0.00135496	-0.0335872	-0.0550546	0.0502159	-0.009164	0.0557401	0.900876
Ap5m1	0.0182523	-0.00282183	-0.0181901	-0.0141548	0.0230541	0.00647833	0.0316183	0.900864
Hsp90aa1	0.00539842	0.0265767	-0.141035	-0.158133	0.192349	-0.127101	0.284472	0.900134
Ssrp1	0.0594993	0.023302	-0.0375083	-0.0836245	0.113536	-0.0201288	0.153036	0.899772
Tpx2	0.00377458	0.0435926	-0.0617039	-0.0761372	-0.0109861	-0.0388933	0.0690292	0.898058
Anxa7	0.00980587	0.017471	-0.0889643	-0.00874002	0.00383313	-0.0284602	0.0604577	0.896743
Chd7	0.0381363	0.0174541	-0.0453964	0.0018817	0.0641425	-0.0209395	0.115219	0.896689
Supt16	0.023501	0.0754088	-0.10417	0.00489735	0.0713694	-0.0398189	0.0987443	0.896112
Kirrel	-0.0120992	0.0191814	-0.0630314	-0.020691	0.0497553	-0.0178117	0.128852	0.89584
Taf3	0.000397227	0.00388083	-0.09634	-0.00811026	0.054141	0.0202642	0.10755	0.895207
2010107E04Rik	0.0442944	0.00924601	-0.250927	-0.036703	0.303972	-0.0544707	0.367863	0.894549
Pxk	0.00547255	-0.0188342	-0.0367847	-0.0410797	0.0201167	-0.00425618	0.047653	0.892612
Chtop	0.0351314	0.0221167	-0.0433335	-0.00188497	0.0125985	-0.00213585	0.0929338	0.892109
Mastl	-0.0113899	0.000342705	-0.0365044	-0.0317179	0.0345396	0.00767116	0.0366511	0.892025
Kpna3	0.0289636	0.07504	-0.097718	-0.0210302	0.130179	-0.0299794	0.0847996	0.891985
Rpl28	0.0120972	0.0671924	-0.0529626	-0.035879	0.0392178	-0.0486828	0.142195	0.891458
Actr8	0.00977052	0.00722074	-0.00766625	0.00548704	0.0203441	0.00256809	0.0326626	0.891401
CAAA01147332.1	-0.00764824	9.55248e-05	-0.0184876	-0.0102542	-0.000749057	-0.00302001	0.0198912	0.891299
Col5a1	0.0269403	0.00080031	-0.111169	-0.0175157	0.130891	-0.0406525	0.17145	0.890517
Ptpn22	0.0041114	0.0183463	-0.0377517	-0.00859846	0.0136044	-0.0277472	0.0588556	0.889706
Sys1	0.0599948	0.0342054	-0.0466488	-0.0429657	0.019921	-0.0365505	0.123533	0.889607
Hmbox1	0.00460586	-0.00601619	-0.0287214	-0.0298249	0.00321653	0.00640626	0.0168344	0.88894
Trmt61a	0.000575667	0.00704543	-0.0133727	-0.0188359	0.0341427	-0.00451399	0.0397779	0.888459
1700123O20Rik	-0.00379263	0.0408147	-0.0670116	0.00351489	0.0424027	0.00371063	0.0571563	0.887491
Mark3	0.000806545	0.00026283	-0.11758	-0.0080428	0.104197	-0.011245	0.121341	0.884371
Fam171a1	0.0223569	-0.000184311	-0.0192205	-0.0139838	0.0233906	-0.0113824	0.0573859	0.883496
Optn	0.00234165	-0.0107329	-0.0398114	-0.00765943	0.0173309	-0.00620719	0.0425779	0.881524
Abcd3	-0.0152825	0.0137708	-0.0280141	-0.0195118	0.00901224	-0.0157995	0.0139591	0.881365
Pbk	0.064418	0.0262133	-0.0952887	-0.00281342	0.0744476	-0.0344712	0.0749254	0.881042
Atg2b	-0.00551844	0.00455438	-0.0399016	-0.00332898	0.0380611	-0.00415974	0.0431286	0.879534
Ska3	-0.000307843	0.0232865	-0.0225986	-0.0317873	0.0500862	-0.0174069	0.0429124	0.879035
Polr3d	0.0190296	0.0366703	-0.0242057	-0.012235	0.0211915	-0.0233269	0.0390731	0.878755
Snap23	0.010981	0.000363986	-0.0207843	-0.0293906	0.0252618	-0.0261813	0.0383341	0.878502
Oxr1	-0.0232432	0.0222462	-0.0514839	-0.0360338	0.0784983	-0.0212695	0.0944185	0.878209
Traf5	-0.00825349	0.0194274	-0.0265778	-0.019962	0.0209764	-0.0100581	0.0137003	0.878018
Ube2q1	0.0526744	0.00727714	-0.053251	-0.0349434	0.0453072	-0.0286343	0.0428814	0.877988
Rps3a1	0.0693989	-0.0132288	-0.210554	-0.00231177	0.115444	0.0463498	0.197737	0.877277
Gnb5	-0.00266835	0.0193657	-0.0376144	-0.0160231	-0.00802392	0.000710859	0.0405867	0.877143
Bnip3l	0.0351412	-0.00318284	-0.300297	0.0125685	0.143166	-0.079917	0.308699	0.877063
Mgat2	0.0813299	0.0148862	-0.0778773	-0.0581997	0.016044	-0.0348262	0.184368	0.876648
Dap3	0.0563231	0.00636233	-0.0795952	-0.0087673	0.115175	-0.0134927	0.0965136	0.876516
Chchd1	0.0494685	0.0599488	-0.146924	0.0146206	0.0895387	0.0202529	0.0892039	0.876411
Eif3e	-0.0128824	-0.00472506	-0.220949	-0.0467644	0.236828	0.0286591	0.239405	0.875882
Mecom	-0.00297793	0.00285708	-0.0169835	-0.00640075	0.0235672	-0.00861858	0.0287754	0.875204
Bub1	-0.0245923	0.0412308	-0.0519294	-0.0651201	0.0411747	-0.0586974	0.0841246	0.874148
Ipo4	0.00438317	0.00400511	-0.0393972	-0.0156789	0.0787159	0.0151498	0.109148	0.872002
Txnrd2	0.0291911	0.00876472	-0.0229189	-0.0547797	0.021895	-0.00174652	0.0398564	0.871998
Hdgf	0.0399196	0.0617273	-0.0474694	0.0186622	0.0581043	-0.0281283	0.0885789	0.871511
Pbx3	0.0432739	0.000774151	-0.0311801	-0.0342776	0.0572528	-0.0301697	0.0765001	0.869813
Sugt1	0.0312811	0.0220398	-0.176339	0.00484022	0.100153	0.0102511	0.0974839	0.86849
Vegfc	0.00952487	0.00046392	-0.072344	-0.0223836	0.0915939	-0.0532068	0.128202	0.867674
Atp5c1	-0.026179	0.0144904	-0.145624	-0.0583165	0.202256	-0.0626494	0.189257	0.867069
Ppp2r2a	-0.0207055	0.0383769	-0.10621	0.00853813	0.0721788	-0.0199731	0.109436	0.866846
Nptx1	0.000907687	0.0270944	-0.0711255	0.00611527	0.0346635	0.00591589	0.0453567	0.866379
Dicer1	-0.00356578	0.000284439	-0.0324768	-0.0508418	-0.000164915	-0.0148683	0.0755832	0.864014
Htra1	-0.108021	0.081132	-0.289185	-0.0416065	0.137536	-0.0658575	0.459763	0.863827
Atl2	0.0305331	-0.00481332	-0.0231374	-0.00839513	0.0394275	-0.00267913	0.0480041	0.862305
Phf10	0.0644885	0.000757346	-0.0384311	-0.0163162	0.0399703	-0.0135859	0.0800046	0.861734
Ndufs4	0.0160141	0.00584416	-0.041997	-0.0277183	0.0367647	0.000662964	0.0106964	0.861419
Frmd4a	-0.00181962	0.0106081	-0.102388	-0.0148426	0.0349267	0.0100577	0.0323263	0.860995
Slc25a13	-0.00820744	0.0153755	-0.0325366	-0.000406337	0.0270902	-0.00873378	0.0290776	0.860367
Chek2	-0.00267727	0.0083037	-0.0102126	-0.0222023	0.00444591	-0.00447168	0.00978109	0.860341
Trpm6	-0.0344743	0.0768522	-0.0697664	-0.0997649	0.00426248	-0.028931	0.135311	0.860219
Hipk1	0.0470405	0.00958659	-0.0877023	0.0118625	0.0278462	-0.00971448	0.141632	0.859154
Spc25	-0.00285567	0.00965168	-0.0385524	-0.0284197	0.0637376	-0.0411599	0.0969484	0.858874
Ctsb	-0.0735549	0.0458257	-0.252152	-0.0901194	0.0383787	0.0890807	0.317568	0.858633
Ppm1j	0.00485569	-0.0123634	-0.0340657	-0.0095205	0.0256663	-0.00097234	0.028178	0.85814
Gas2l3	0.0119504	0.00366326	-0.0116728	-0.0320243	0.0173703	-0.00331019	0.0195315	0.856673
Wapl	0.00258317	0.0342884	-0.0997423	0.00751598	0.0130789	-0.00636565	0.0696803	0.856478
Cpsf2	-0.0112373	0.00449451	-0.0595788	-0.0313376	0.0603503	-0.0313569	0.163272	0.856377
Abcc5	-0.00358945	0.00148003	-0.0116215	-0.00366634	0.0118768	-0.00578281	0.0255919	0.856133
Herpud1	-0.00860488	-0.00603807	-0.0921198	-0.110407	0.158895	-0.0666283	0.131384	0.855903
Mindy2	0.00850314	-0.0221274	-0.105762	-0.019468	0.0882967	-0.011342	0.0732283	0.855786
Mrpl9	0.00979325	0.0300255	-0.0473991	-0.0504648	0.0429011	-0.0455114	0.0222249	0.855414
Yy1	-0.050668	0.0531954	-0.104368	-0.0348769	0.0212867	-0.0439125	0.161122	0.855388
Rbm8a	0.0628626	0.0314748	-0.117827	-0.0367443	0.0820909	-0.014219	0.0305977	0.854777
Naga	-0.0125397	0.0271268	-0.0420301	-0.0273979	0.00324141	-0.0257934	0.0122894	0.853251
Shox2	-0.00261203	0.00618481	-0.0379157	-0.0325684	0.0147962	-0.00285252	0.115021	0.852265
Derl1	0.0278734	0.0480593	-0.0554765	-0.109833	-0.0162595	-0.0480735	0.125323	0.84964
Ddx47	0.0381983	-0.00148082	-0.0294348	-0.0398092	0.00305191	-0.00857683	0.0487855	0.849095
Mydgf	0.0589825	0.00918024	-0.0331898	-0.0388949	0.119795	-0.0310173	0.115921	0.848341
Ank	0.0540952	-0.105872	-0.316165	-0.0790699	0.418417	0.00127663	0.555622	0.847982
Tars	0.031204	-0.0314831	-0.100868	-0.116709	0.103679	0.042796	0.090988	0.847913
Clcn5	-0.00182895	0.0192551	-0.0165323	-0.0350705	0.000527466	-0.0164288	0.0482675	0.847625
Mfn1	0.000740988	0.00185449	-0.024524	-0.0417879	0.00112746	-0.0248572	0.00388329	0.84748
Cfl2	0.0270999	-0.00911669	-0.101375	-0.0363366	0.200372	-0.0375637	0.333604	0.846407
Akap11	-0.0200307	0.0340092	-0.0543283	-0.0117585	0.00836469	0.00275535	0.0405956	0.845283
Il11ra1	0.038335	0.00895459	-0.0205826	-0.023437	0.0106966	-0.0020468	0.0300961	0.845089
Ero1l	0.0321527	-0.108556	-0.53704	-0.0833184	0.45903	-0.332321	0.581963	0.844864
Emc7	-0.0172793	-0.00256465	-0.0778666	-0.0859998	0.170882	-0.0528647	0.233104	0.844503
Gnl3	-0.0283263	0.059465	-0.190265	0.0437575	0.127921	-0.0186158	0.279491	0.844064
Atp5e	-0.026153	0.0569457	-0.0876248	-0.0709175	0.219635	-0.0300041	0.176301	0.843877
C1qtnf6	-0.00447321	-0.00134749	-0.0116961	-0.0121177	0.00603018	0.00613049	0.0221695	0.843565
Ndfip2	0.0451009	0.0300963	-0.160731	0.0477133	0.111301	0.00859341	0.145037	0.843054
Ncaph2	0.00207363	0.0403955	-0.0623213	-0.0184958	0.0189548	0.00199583	0.0145512	0.841887
Ncapg2	-0.0404734	0.0394463	-0.048853	-0.0782231	0.11303	-0.0397867	0.173812	0.841752
Camk2g	0.0651922	-0.00945845	-0.0800688	0.0013965	0.0704137	0.0375254	0.0943745	0.840942
Fxr1	0.0915072	0.00740592	-0.136812	0.0134254	0.0908653	-0.00226494	0.097191	0.840526
Lrpap1	-0.0450379	0.0330595	-0.111712	-0.00523449	0.0822374	-0.0463909	0.199589	0.839564
Phldb1	-0.0211701	0.00614504	-0.0315646	-0.0560948	0.0230904	-0.00210544	0.101301	0.839507
Klc4	-0.00222839	-0.00663748	-0.0210201	-0.019051	0.0107252	0.00285926	0.00464227	0.838131
Nxn	-0.00426715	-0.0270893	-0.0742436	-0.0319655	0.0879161	-0.0198958	0.172967	0.838045
Arhgap28	-0.00827062	0.00682833	-0.0165881	-0.00342566	0.00774736	-0.00410247	0.0339517	0.837248
Zbed3	0.00363459	-0.00315506	-0.0142562	9.308e-05	0.00893681	-0.00541074	0.0247578	0.837081
Max	-0.054409	-0.00100384	-0.0948578	-0.0341421	0.0608059	-0.0441797	0.15756	0.837073
Slc39a14	-0.00409808	-0.0128153	-0.101953	-0.00585406	0.131863	-0.0311305	0.198255	0.837055
Diaph3	-0.000382698	0.0363489	-0.043228	-0.0316068	0.124069	-0.0445381	0.11379	0.837017
4932438A13Rik	-0.0236257	0.0162691	-0.0482678	-0.0769934	-0.0161072	-0.029702	0.0101249	0.836733
Angptl4	0.0780794	0.0211825	-0.106049	-0.0390085	0.0302881	0.0393527	0.0514199	0.836624
Eif2b2	0.0205009	0.00874154	-0.014887	-0.0134258	0.0354995	-0.028356	0.0522617	0.836251
Timm10	-0.0154867	0.0162596	-0.0176219	-0.0118177	0.02807	-0.0043524	0.0373601	0.83602
Ndc80	-0.0148182	0.0382488	-0.0440524	-0.0640858	0.00537892	-0.0335335	0.0192186	0.835969
Ppid	0.0101045	0.0686096	-0.0535184	-0.117298	0.0792498	-0.0918854	0.0886292	0.835499
Fermt2	-0.0522052	-0.0305844	-0.218223	-0.0666734	0.320942	-0.0680048	0.387539	0.835119
Dnttip2	0.0981444	0.00270086	-0.0787892	-0.0348243	0.0933177	-0.0600529	0.0961377	0.834586
Trip11	0.0494891	-0.0191704	-0.0918651	0.0134066	0.0691684	-0.00754387	0.1737	0.834231
Azin1	-0.0292742	0.0661109	-0.204317	0.0243126	0.0624379	0.0353644	0.171764	0.833911
Snx16	-0.0149859	0.0125493	-0.0299056	-0.0152589	0.0222962	-0.00869929	0.0107431	0.833792
S100a4	0.155726	0.0719903	-1.56733	0.089656	0.595165	0.0710094	0.720811	0.832984
Psmb5	0.0169657	0.0123621	-0.143813	0.0177351	0.193622	0.00667007	0.162204	0.832969
Ensa	-0.0292202	-0.00430598	-0.0432067	-0.0694661	0.0674617	-0.0148738	0.0637895	0.832609
Cdc73	0.0163752	0.0118401	-0.0215598	-0.0658778	0.0218232	-0.0351238	0.0392305	0.831063
Larp1b	0.0249894	0.000979473	-0.0421319	-0.0700652	0.018498	-0.0198654	0.18313	0.830957
Dtnbp1	0.0145632	-0.011738	-0.0403172	0.000235342	0.0347042	0.00252997	0.0416695	0.830821
Cdc42bpb	-0.00294745	-0.00491044	-0.0992078	0.00895795	0.0767713	-0.0305761	0.190395	0.830701
Knstrn	0.0216779	0.04002	-0.0546282	-0.0400464	0.0610212	-0.0748106	0.0533036	0.830654
Nrp1	-0.0139718	0.0130298	-0.0241454	-0.0101565	0.0318679	-0.0216711	0.0459563	0.830607
Acod1	-0.00859831	0.0439967	-0.0424147	-0.0489514	0.0136813	-0.036064	0.0204417	0.830014
Xpo4	0.00944062	0.00943358	-0.0353902	0.000970308	0.0391404	0.0117405	0.136422	0.829689
Prps2	0.00185818	0.0247064	-0.011153	-0.00879185	0.0339945	-0.0230263	0.0653982	0.829478
Cryl1	-0.0174082	0.0111872	-0.0275448	-0.00387531	0.0161929	-0.00662593	0.0403031	0.829371
Aunip	0.000127596	0.0177409	-0.0137557	-0.00632207	0.00843074	-0.0137008	0.0148219	0.828972
Fndc7	0.000200024	-0.0053768	-0.00699884	-0.014141	0.0035525	-0.00171937	0.00880684	0.828817
Sass6	0.0171915	0.015391	-0.0230854	-0.0154625	-0.00639203	-0.0185625	0.054623	0.82831
Dpy19l1	0.021258	-0.00363801	-0.0163234	0.00122842	0.029169	-0.00251763	0.0622537	0.828293
Mthfd1l	-0.0136214	0.00996166	-0.0377133	-0.0381365	0.0444413	-0.0265159	0.0165491	0.828273
Acbd5	0.0123726	-0.0245885	-0.0724554	-0.0509524	0.0202731	-0.038163	-0.0065479	0.827322
Vbp1	-0.0207338	0.0467964	-0.0407822	-0.041475	0.0301225	-0.0502263	0.141906	0.826756
Pxmp4	-0.00514147	4.16902e-05	-0.0217597	-0.0147102	0.0235758	-0.029093	0.0398211	0.826702
Aars2	-0.000570894	-0.0026943	-0.00622716	-0.0113518	0.0023571	-0.00358717	0.0193998	0.82669
Nudcd1	0.00696719	0.0160256	-0.0159415	-0.0140752	0.0745606	-0.0208335	0.117941	0.826451
Snx14	0.0157425	-0.0061787	-0.0129756	-0.015573	0.0270421	-0.0113106	0.0628803	0.82605
Vim	-0.0910052	0.0893842	-0.729718	0.0497654	0.365494	0.0827574	0.426031	0.825699
Col12a1	-0.0245961	0.0305765	-0.0409249	-0.049792	0.0407875	-0.049345	0.156287	0.825285
Eef1akmt1	-0.0256776	0.0310612	-0.054588	-0.00597212	0.0478623	-0.00837118	0.0436189	0.825195
Calm1	-0.0224777	0.0191944	-0.28497	0.00810739	0.415656	-0.119442	0.438116	0.825081
Bub1b	0.00304793	-0.00559908	-0.0185072	-0.0114931	0.0383324	-0.00466433	0.0328506	0.824407
Col16a1	-0.0101838	0.0195627	-0.0339359	-0.0369516	0.0907554	-0.0368558	0.08092	0.82416
Plscr4	-0.020138	0.0191541	-0.0213056	-0.0171551	0.0411361	-0.0126152	0.0549911	0.823623
Anln	0.0613563	0.0315441	-0.0687562	-0.0133022	0.0588973	-0.0967748	0.173069	0.822588
Dhrs4	0.0264176	0.00896594	-0.0244175	0.00460013	0.019948	-0.0134835	0.0274015	0.821756
S100a9	-0.108867	0.0361313	-0.151351	-0.332734	0.188118	0.101465	0.348663	0.8217
Gm10269	-0.0067722	-0.000368655	-0.00906049	-0.0104693	0.0131276	-0.00222449	0.0111618	0.82163
Rgcc	-0.0588515	-0.00270202	-0.0977521	-0.0213006	0.066322	-0.0100248	0.114216	0.821203
Smpdl3b	0.0228969	0.000622769	-0.0155481	-0.0487214	0.042632	-0.029941	0.0509549	0.821018
Sacs	-0.0084496	0.00604372	-0.0165181	-0.0215514	0.0525179	-0.0100528	0.055948	0.820982
Tmem37	0.01214	-0.00418857	-0.0434381	-0.00247098	0.00839235	-0.00263002	0.0142808	0.819858
Tnfsf9	0.0344034	-0.0263948	-0.0827716	-0.00553704	0.119105	-0.000932043	0.112109	0.819829
Plscr1	-0.0506913	0.0426014	-0.090253	-0.00217868	0.13745	-0.00468618	0.173147	0.819765
Tmem110	0.000614232	-0.0164166	-0.0230534	-0.0329663	0.0463332	-0.00550796	0.0736272	0.819553
Etv1	0.0196076	0.0045318	-0.0834054	-0.0588076	0.112428	-0.108297	0.326272	0.818865
Srp72	-0.0218633	-0.010196	-0.0501846	-0.0797323	0.0569758	0.0403581	0.128871	0.818467
Cnih1	0.0423644	0.0204953	-0.0876401	0.000778692	0.165131	0.0372778	0.0959275	0.818356
Kif4	0.00712015	-0.00700645	-0.0209422	-0.0427192	0.0394979	-0.0282135	0.0349278	0.818242
Vps50	-0.00430621	-0.00810019	-0.0213511	-0.0343803	0.035111	-0.00980529	0.0230984	0.81824
Exoc3l4	-0.0251162	0.0413068	-0.0707425	-0.0797198	0.103613	-0.0111396	0.0380543	0.818227
Tbl2	0.0030857	-0.00344088	-0.0154695	-0.0137053	0.0349283	-0.0176541	0.0384742	0.817893
Plk4	-0.0363361	-0.00787289	-0.0564926	-0.0389151	0.0876702	-0.0227723	0.130574	0.817585
Zmat3	-0.00111478	-0.00156442	-0.00626485	-0.0205445	0.0167697	0.00115518	0.0387947	0.816887
Mta1	0.046944	0.0026549	-0.12538	0.0366487	0.060223	-0.0165642	0.117429	0.816284
Ppp4r3a	0.0137337	-0.0334867	-0.0689742	-0.0177173	0.101902	-0.0109351	0.180306	0.816108
Cdc14a	-0.0331407	-0.000670663	-0.0321901	-0.0466935	0.0214826	0.00244924	0.051436	0.815859
Tnfaip2	-0.0527748	0.110729	-0.195433	0.0556044	0.177248	-0.0673161	0.273486	0.815603
Chd1l	0.00723417	-0.0119751	-0.0194198	-0.0201494	0.0443816	-0.0145337	0.0583517	0.815473
Pigk	-0.0140569	0.000194515	-0.0647497	0.00626675	0.0654836	-0.0123981	0.145943	0.814953
Ddx1	0.00246869	-0.00375102	-0.083824	-0.0517607	0.148004	-0.0781528	0.354863	0.814546
Rps28	-0.0168018	-0.00118985	-0.0798227	-0.00186835	0.0832452	0.0449527	0.123972	0.81393
Gpatch4	0.0462619	0.0488876	-0.03445	-0.0511249	0.0470767	-0.0437601	0.0363137	0.813759
Snhg6	-0.00997687	0.0257581	-0.0621634	-0.000942468	0.0904361	-0.00641249	0.0552933	0.813339
Kdelr3	0.0418525	-0.026583	-0.100889	-0.00335824	0.0988728	0.032408	0.0942955	0.813186
Rapsn	3.17198e-05	-0.000938798	-0.00313666	-0.0126538	0.0105331	-0.00273867	0.0139956	0.81305
Mef2c	-0.0108436	0.00610719	-0.0232749	-0.0212292	0.058748	-0.0216254	0.0583972	0.81213
Hmox1	-0.0795384	0.0659603	-0.0987669	-0.181846	0.00792724	-0.0952194	0.312556	0.811937
Pdgfra	-0.0437187	0.0317769	-0.059003	-0.0332507	0.0630013	-0.0486382	0.186782	0.81172
Csde1	0.0339156	-0.0148093	-0.0926782	-0.00935243	0.230695	-0.0342108	0.246721	0.811286
2010111I01Rik	0.0347946	-0.00565809	-0.0575903	-0.0625498	-0.0182124	-0.0662303	0.108201	0.810659
Ak1	-0.00756878	-0.0127741	-0.0504392	-0.0240521	0.0421195	0.0353371	0.122795	0.810331
Ubr7	0.0236276	0.00129132	-0.0240638	0.00140762	0.0658426	-0.024122	0.0840966	0.810222
Cox6c	0.0045091	0.137675	-0.270067	-0.00921977	0.163257	0.0740062	0.095682	0.809805
Mgp	0.479992	-0.385005	-1.21411	-0.124065	0.466127	-0.783518	2.1975	0.809742
Kin	-0.0215244	0.00854933	-0.0755093	0.0117224	0.0558725	-0.0296145	0.0891605	0.80873
Mphosph8	0.0170119	0.0162167	-0.0334149	0.00194292	0.065013	-0.0480732	0.105489	0.808153
Lamb1	0.00910316	0.000129867	-0.149839	0.0449994	0.101497	-0.00492336	0.303999	0.807882
Spata7	-0.284457	0.144736	-0.442613	-0.115122	0.488542	0.0213904	0.444294	0.807811
Gen1	0.0234534	-0.00196695	-0.00729179	-0.0158628	0.0204264	-0.0131261	0.0558629	0.806697
Slc11a2	-0.00380425	-0.00301356	-0.0109644	-0.00766194	0.0189059	-0.000485029	0.0429551	0.805103
Ska1	0.00466497	0.005325	-0.0123558	-0.0608898	0.0275387	-0.0362906	0.066161	0.80455
Pcyt1a	-0.0117104	-0.0140646	-0.0226852	-0.0296519	0.00546654	0.00329713	0.0162417	0.804332
Scfd1	0.0155058	-0.0111826	-0.0372692	-0.0196857	0.0534729	-0.0519101	0.0973787	0.804071
Inf2	-0.0181621	-0.0155954	-0.0846401	-0.0508335	0.084401	0.0662526	0.10514	0.803954
Dclre1c	-2.47899e-05	-0.000537404	-0.0119513	-0.0176237	0.0152203	-0.00431052	0.00324694	0.803119
Pcolce	0.115216	-0.0949603	-0.368854	0.0289521	0.247449	0.0689096	0.306043	0.803096
Il7	-0.0133526	0.0105561	-0.0194978	-0.00603686	0.0357429	-0.011497	0.036756	0.802641
Naa15	0.01398	0.00487903	-0.0395712	0.00652765	0.0211642	-0.00984233	0.12194	0.802164
Tubb4b	0.127663	0.0495927	-0.142809	-0.0736974	-0.0416347	-0.0844375	0.125085	0.80214
Cdc27	-0.0212942	0.0110285	-0.0441514	-0.00033516	0.0196551	-0.0161199	0.0295242	0.801987
Slc27a4	0.0182121	-0.00565653	-0.0125606	-0.021471	0.00925203	-0.00762455	0.0157141	0.801659
Cox11	-0.00232519	-0.00587098	-0.0186752	-0.0249875	-0.00713628	0.000765103	0.03786	0.80151
Kif22	0.00309408	0.0238823	-0.0356412	-0.0181268	0.00175648	-0.016102	0.00200469	0.801197
Selenom	-0.0930539	0.057756	-0.157797	-0.0438198	0.244059	-0.0591537	0.196545	0.800945
Ptk2b	0.0330652	-0.0194669	-0.0325896	-0.0243819	0.00569026	-0.00323821	0.0514496	0.800507
Lysmd1	0.0117822	0.0070309	-0.012229	-0.0159709	-0.00364071	-0.000617168	0.00866639	0.800309
Fkbp7	0.00689555	-0.0191675	-0.0579627	-0.0541841	0.0406122	0.0590286	0.169307	0.799659
Gemin2	0.0554001	0.00163955	-0.00946583	-0.0254036	0.08209	-0.0219386	0.092344	0.799596
Tfeb	-0.00477274	-0.00425257	-0.0119027	-0.0108323	0.00355026	0.00296004	0.0295176	0.799379
Gnas	0.023946	0.0122411	-0.00959072	-0.0232629	0.0744131	-0.0398777	0.118187	0.799145
Lix1l	-0.128256	0.0517108	-0.181464	-0.0136779	0.152331	-0.0494458	0.251633	0.798945
Rpl34	-0.0251099	0.0240892	-0.236293	0.0294392	0.16547	0.0424763	0.148046	0.798852
Mrpl13	0.0276872	0.0242776	-0.0193048	-0.161235	0.0828231	-0.0712606	0.153648	0.79836
Dhrs1	-0.00799705	-0.0012572	-0.0432746	-0.032591	0.0414984	0.0399701	0.0461609	0.797971
Zfp959	-0.0102705	0.000640445	-0.0141635	-0.0157107	0.00988144	-0.016703	0.0458227	0.797642
Timm9	0.0216157	-0.017041	-0.0274866	-0.0610834	0.155717	-0.0166235	0.228083	0.797578
Mettl3	-0.00922626	0.00670505	-0.0229316	-0.00249547	0.0160927	-0.00949541	0.0100323	0.797167
Gm2000	0.0985734	-0.00665138	-0.0351975	-0.0646876	0.070195	-0.0647063	0.250212	0.797098
Galt	-0.014115	0.00954424	-0.0227541	-0.000119134	0.0142516	-0.00736531	0.049516	0.796975
Sema3e	-0.0178526	-0.0121301	-0.0209528	-0.0437258	0.0353516	-0.0154768	0.07092	0.796729
Dhx36	-0.00691199	0.0110445	-0.0986983	-0.0870028	-0.0259754	0.0515012	0.0648252	0.796324
Zc3h14	-0.0337555	0.0410174	-0.101857	0.0214401	0.0770129	-0.0466392	0.252532	0.795871
Mkrn1	0.06869	-0.0104078	-0.0224554	-0.0589423	0.0579798	-0.0472358	0.120968	0.795632
Bcl9l	-0.00291803	-0.00279721	-0.0257627	-0.0251951	-0.0153362	-0.00593498	0.0474239	0.794999
Nop9	-0.0290565	0.012533	-0.0217398	-0.0335014	0.0328539	0.00185822	0.0450725	0.794464
Bcap29	0.0717838	-0.00892168	-0.0433325	-0.0210061	0.154772	-0.000676858	0.112084	0.792717
Cct3	0.0244455	0.00941147	-0.0462865	-0.0345241	0.168285	-0.0333819	0.115028	0.792124
Tubgcp4	0.0327563	0.00691729	-0.00970871	-0.0183455	0.0466546	-0.00971077	0.0304907	0.791336
B4galt5	-0.0300623	-0.0181304	-0.0469325	-0.0454359	0.104264	-0.00891612	0.129239	0.789648
Gm39469	0.00317486	-0.000398208	-0.0164269	-0.0185238	0.0589256	-0.0116081	0.0435219	0.789574
Ccna2	0.0190081	0.0115278	-0.0919815	-0.0457352	0.161484	-0.125065	0.126921	0.789427
Kif15	-0.0208145	0.0240815	-0.0342854	-0.0270096	0.038375	-0.0379789	0.0256133	0.789001
Pdgfc	0.00615554	0.0650401	-0.202565	0.0599287	0.0646455	-0.109787	0.205169	0.788983
Gchfr	-0.00325069	-0.0374951	-0.134273	-0.0444606	0.288908	-0.0203337	0.233155	0.7884
Sephs1	-0.0201488	0.0158373	-0.0242098	-0.0554717	0.0114126	-0.0175443	0.0122131	0.788337
Ttc8	-0.0327964	-0.00465099	-0.0547463	-0.0038129	0.049747	-0.0122836	0.091395	0.788138
Mdm1	-0.00525712	-0.0019782	-0.00975014	-0.024234	0.00482526	0.00491113	0.0153529	0.78779
Esf1	0.0198078	-0.0253443	-0.0239062	-0.0990416	0.0451242	-0.000372184	0.0955454	0.78766
Agpat4	-0.0491762	0.0304812	-0.0337703	-0.0451881	0.0301543	-0.00200572	0.0842448	0.78668
Suv39h2	-0.0250933	0.0055971	-0.0450012	-0.00497534	0.0150865	-0.0271342	0.024372	0.786278
Sap18	-0.0620036	0.0709732	-0.240419	0.00787779	0.190043	-0.0181853	0.107273	0.786182
Gclm	-0.0269489	-0.0433045	-0.0704843	-0.126501	0.224004	-0.073011	0.319632	0.785878
Pacs2	0.00515794	0.00287308	-0.0138503	-0.00567815	0.00218141	-0.0173604	0.00835683	0.785824
Gm49336	0.0209736	0.00830405	0.000659263	-0.00814445	0.0304439	-0.0141141	0.0402529	0.785678
Map4k5	0.0180531	-0.0152506	-0.0100076	-0.0568879	0.0466518	-0.00667798	0.114355	0.785413
Sars	0.156345	-0.00400717	-0.117372	-0.0595212	-0.00726754	-0.00904552	0.142119	0.785189
Esco2	-0.0260345	0.0247038	-0.0449881	-0.0162436	0.0218842	-0.0152258	0.0124049	0.784977
Zmym1	0.0162559	0.00197589	-0.0042386	-0.0222644	0.00630245	-0.00944338	0.0240427	0.78427
2010315B03Rik	0.00392416	0.0165419	-0.0088855	-0.0145957	0.00650078	-0.0131103	0.00913459	0.784261
Ctgf	0.0370494	0.0160923	-0.0315249	-0.0202839	0.00455928	-0.0321449	0.0256154	0.783964
H60b	0.0328284	-0.0137648	-0.0879104	-0.0840465	0.00331775	0.0461659	0.037202	0.783802
Ndufc1	-0.0393788	0.0148324	-0.119151	0.0218954	0.122553	-0.0097239	0.123675	0.783726
Sema7a	-0.00430704	-0.0266275	-0.0430392	-0.0218973	0.0865063	-0.0208448	0.112854	0.783618
Fancm	0.000940793	-0.00672962	-0.00626815	-0.015527	0.0215402	-0.000278093	0.0271223	0.783524
Rps24	0.00680062	0.0580639	-0.265603	0.0826004	0.220793	-0.00274262	0.182098	0.783375
Il6st	-0.0722453	0.0149208	-0.0623635	-0.0587406	0.0246419	-0.00242959	0.136879	0.783353
Mink1	-0.0173647	-0.00720568	-0.0372808	-0.00248908	0.0305617	-0.0138424	0.0363068	0.783113
Hspa14	0.0604799	0.0325017	-0.0751201	0.0496833	0.100078	-0.0505428	0.12824	0.783109
Hif1a	-0.062841	-0.0388597	-0.135806	-0.0963801	0.342997	-0.109794	0.446415	0.783018
Mpst	0.0164894	0.00164362	-0.043851	-0.0215872	-0.0112026	-0.0205428	0.000367557	0.782262
Cdkl5	0.0047161	-0.00456645	-0.010717	-0.00218155	0.0267466	-0.0101944	0.0363808	0.782081
Gatad2b	-0.0268777	0.00734421	-0.0452365	-0.0190506	0.000924453	0.00368839	0.10152	0.781689
Cnksr3	0.00995832	0.000931036	-0.0105662	-0.0122674	0.0223798	-0.00518975	0.00764959	0.781019
Vegfa	0.00559634	-0.0291386	-0.167402	0.0105214	0.0373466	-0.0848278	0.324049	0.780769
Wars	-0.0292383	0.0018055	-0.0203078	-0.0718915	0.0445538	-0.0259864	0.0627199	0.780497
Cinp	-0.0477028	0.017433	-0.0558865	-0.0561746	0.134746	-0.0282485	0.102548	0.780431
Cenpi	0.0268261	0.00917861	-0.0114575	-0.00995157	0.00391493	-0.0185331	0.0365291	0.779582
Tatdn1	-0.0380046	-0.0371666	-0.0496506	-0.105069	0.0480174	-0.0174311	0.187484	0.779447
Gstm2	-0.0366511	0.0165724	-0.0375873	-0.0267292	0.0660302	0.0187999	0.0664672	0.778856
Actn1	-0.0257418	-0.0085172	-0.0522287	-0.0571943	0.179797	-0.0641371	0.283845	0.778763
Id2	-0.0266786	0.0483543	-0.139694	0.051446	0.0810743	-0.0753695	0.215997	0.778742
Dtd2	-0.0625279	0.0275499	-0.0540003	-0.0583147	0.135666	-0.0332034	0.131885	0.778401
Frrs1	0.0536365	-0.0389352	-0.0473039	-0.04158	0.0947863	-0.0639084	0.144793	0.778345
Rpl36al	-0.0248737	-0.00107707	-0.0942075	-0.078708	0.288558	-0.00571531	0.203087	0.777936
Ttbk2	0.0059966	0.000983475	0.000793146	-0.00588305	0.0149436	0.00205898	0.0366165	0.777802
Tiam1	0.00469772	0.00151006	-0.1054	0.00656003	0.0730458	0.0405447	0.0569238	0.777728
Rhbdd1	-0.0118821	-0.0115738	-0.0222775	-0.0119354	-0.000785865	-0.0251908	0.0118922	0.777505
Lamtor2	0.0591378	0.0278123	-0.117375	-0.0315857	0.056206	-0.010849	0.00208249	0.776873
Nfatc2	-0.0178966	-0.00775409	-0.0389416	-0.00363392	0.0206671	-0.000689438	0.0834526	0.776707
Mrpl45	0.0193404	0.00425751	-0.0233221	-0.0806109	-0.00621194	-0.0476582	0.115689	0.776006
Kctd9	-0.00376674	-0.000437704	-0.0219434	0.00490479	0.0118073	-0.0126431	0.0257725	0.775983
Sec14l1	-0.0236045	-0.0107661	-0.0270212	-0.0356188	0.0480949	-0.0245929	0.0473762	0.77589
Traf3	-0.00226225	0.0248649	-0.0441615	-0.0219208	0.00431297	0.0552918	0.0963867	0.775681
Plekhf1	0.0301189	-0.00633463	-0.0233897	-0.018042	0.00659188	-0.00950416	0.0177729	0.775414
Samm50	0.104897	-0.00296636	-0.0939441	-0.0515505	0.0585745	0.0204897	0.0399263	0.775316
Ptgs1	0.0210973	-0.0137628	-0.0215296	-0.0150185	0.0063769	-0.0158143	0.0659203	0.775122
Wipf2	0.0165637	0.0186275	-0.024091	-0.00194485	0.0225079	-0.00984755	0.00711438	0.774707
Top1	-0.0439395	0.055532	-0.106352	0.0350407	0.0778889	-0.0493392	0.158542	0.774341
Romo1	-0.0356605	0.0451963	-0.092721	0.0129643	0.16165	-0.0644451	0.152211	0.774191
Aimp1	0.0667279	-0.00092686	-0.0733219	-0.0330117	0.0817126	-0.0287552	0.0263537	0.774164
Cd2ap	0.0456195	-0.0178246	-0.0323574	-0.0345469	0.0428132	-0.0579525	0.0851698	0.773501
Spata5	-0.00398706	0.0157335	-0.013437	0.00413521	0.0221692	-0.0146516	0.0293435	0.773291
Btbd7	0.0576156	-0.0153144	-0.120646	0.045427	0.0488889	-0.0383882	0.195748	0.772408
Rock2	-0.0109999	0.0635865	-0.0975419	0.0201838	0.0237422	-0.0394044	0.301925	0.772365
Mrpl52	0.0572259	0.0415889	-0.298214	0.000296666	0.292706	-0.0114178	0.0900455	0.772032
mt-Nd5	0.0613348	-0.0822035	-0.0698724	-0.280897	0.110054	0.0115997	0.245493	0.772009
Zfp931	0.00590502	-0.00308095	-0.00283773	-0.00554805	0.00518536	-0.00456608	0.0170086	0.771971
Fhl3	0.00438951	-0.00643707	-0.0131555	-0.026854	0.0359293	-0.00609779	0.0201386	0.771783
Eml5	-0.00145192	-0.0182822	-0.0163292	-0.0436326	0.0727572	-0.0167666	0.120319	0.771304
Gpsm3	0.108549	0.038218	-0.164631	0.0443428	-0.0156259	0.0336944	0.248404	0.771217
Knl1	0.00219823	0.0166417	-0.0291124	-0.0176659	0.045314	-0.0661565	0.142254	0.770818
Rpl37	-0.0497683	0.0746336	-0.195981	0.0230863	0.057537	0.0491699	0.117532	0.770672
Fkbp14	-0.00293513	-0.00180089	-0.0176974	0.00354303	0.0407595	-0.00464623	0.0483661	0.770427
Fkbp3	-0.0114105	0.0414448	-0.0102369	-0.0893337	0.199934	-0.0768689	0.256619	0.770301
Def6	-0.0216165	-0.00839803	-0.0237268	-0.021724	0.0323613	0.00227636	0.0370521	0.769589
Mki67	-0.0346695	-0.0309343	-0.0443647	-0.0911523	0.0386242	-0.0430473	0.189202	0.769435
Mthfd1	-0.00590057	0.0154094	-0.0149047	-0.0296703	0.0790624	-0.0464063	0.0935732	0.769358
Rpl30	0.0203614	0.105951	-0.288462	0.0418156	0.0234996	0.0676055	0.149009	0.769275
Rnf26	-0.00318473	-0.0026707	-0.0197632	-0.0257286	-0.0115601	-0.0236631	0.0492521	0.768459
Spire1	0.0258441	-0.00696953	-0.0103546	-0.00146979	0.0171889	0.00275868	0.0359734	0.768455
Ace	-0.0320069	-0.070784	-0.198587	-0.190785	0.406016	-0.0533373	0.209661	0.768299
Snx13	-0.021536	0.0212008	-0.0195759	-0.00722026	0.0327982	-0.0232221	0.0586154	0.768043
Abi2	-0.0262763	0.0626886	-0.0324792	-0.0497964	0.011314	-0.0124203	0.0434448	0.767682
Ccdc71l	0.0320288	0.00176583	-0.00221777	-0.0185976	0.0116331	-0.00410859	0.0453389	0.767507
Bsn	0.00866795	-0.00267652	-0.00657576	-0.00434199	-0.000492393	-0.00293374	0.0184362	0.767409
Stam	-0.0235951	-0.0279247	-0.0690523	-0.00152939	0.0918348	0.00624444	0.16107	0.766755
Ift80	-0.0205165	0.0102143	-0.0159748	-0.0221091	0.00100838	0.00182788	0.0334434	0.765372
Rfx7	-0.000668211	-0.00774202	-0.020247	-0.0145265	0.0583277	-0.0222107	0.0541084	0.765198
Rbpms	-0.105889	0.00881264	-0.0950581	-0.0701248	0.104297	-0.10286	0.285876	0.764684
Sfxn1	0.039234	0.0753508	-0.0413065	-0.0581887	0.12795	-0.0783861	0.0641541	0.764478
Osmr	-0.0413275	-0.0075503	-0.0448534	-0.0391357	-0.0146522	-0.0482785	0.0602868	0.764357
Zfp386	-0.0111994	-0.00479927	-0.00912325	-0.0212519	0.0234234	-0.0119147	0.049985	0.764333
Cav1	0.0220941	-0.000213462	-0.0232179	0.00887325	0.0109771	-0.0143931	0.0633076	0.76418
Zc3h13	0.0124427	-0.0282688	-0.0736351	0.0123348	0.0341062	-0.0286621	0.141692	0.764061
Ispd	-0.00760598	0.00110636	-0.0158315	-0.0186589	0.0144317	0.0188918	0.0226146	0.763609
Slc33a1	0.0491036	0.00719141	-0.0334619	-0.0278408	0.00159792	0.0156736	0.0305278	0.762961
Ncapg	-0.00925837	0.020725	-0.0161173	-0.0458057	0.0271635	-0.0566163	0.0586205	0.76282
Nt5e	0.131396	-0.101559	-0.138714	0.00680866	0.143656	-0.00141885	0.338024	0.762734
Sema3b	-0.00224964	0.00772561	-0.0433662	0.0222686	0.0221771	0.00226171	0.090095	0.762509
Ubap2l	-0.0120727	0.0163063	-0.087135	0.0414251	0.0568158	0.00628469	0.107481	0.762458
Ppp4r1	-0.00844277	-0.0180218	-0.0257108	-0.0129843	0.00385371	-0.026922	0.0312676	0.76197
Pik3r1	-0.0439706	0.00982291	-0.0336258	-0.0434841	0.0647277	-0.0159226	0.0562212	0.761862
Cd63	0.0787495	-0.0706136	-0.125107	-0.000763066	0.0895074	0.0447925	0.162923	0.761113
Itgb1bp1	-0.0508932	-0.0458577	-0.0963242	-0.0542483	0.27525	-0.0102675	0.34995	0.760942
Dnajc9	-0.00339377	0.0384099	-0.048872	0.0368241	0.0877234	0.000365768	0.0804329	0.76087
Sypl	0.0058921	-0.0316996	-0.0183409	-0.0737721	0.109593	-0.0221145	0.212209	0.760448
Oaf	0.0515735	-0.109368	-0.155271	-0.0150011	0.326285	-0.0738844	0.413547	0.760304
Pxylp1	-0.00460213	0.0113966	-0.0185186	0.000386621	-0.000689269	-0.0167651	0.0321114	0.760239
Mettl14	-0.00586071	0.0129047	-0.0154993	-0.0122664	0.0295592	-0.0187784	0.0142584	0.760104
Lgmn	-0.0790124	-0.064659	-0.133401	-0.105556	0.274421	-0.165308	0.533192	0.759841
Vrk1	-0.0127833	0.00609655	-0.0694673	0.0354965	0.0829849	-0.0249945	0.176115	0.75973
Prune1	0.0212464	-0.000852197	-0.0185427	-0.0157013	-0.00332181	0.0131163	0.0249525	0.759672
Gpx8	-0.0110278	0.0300142	-0.065197	0.0386322	0.102843	-0.0495508	0.163444	0.75946
Lysmd3	-0.0244796	0.00744219	-0.0191746	-0.0299234	0.0101371	-0.00527233	0.011407	0.758433
Bex3	0.0735159	-0.0312781	-0.1097	0.0240081	0.221883	-0.0064242	0.166016	0.758093
Papola	-0.0172879	-0.0337702	-0.134013	-0.0393708	0.269169	0.0268441	0.174714	0.758075
Selenof	0.0631493	0.0406672	-0.193149	0.0901017	0.0973473	0.0260844	0.145077	0.757844
Nomo1	-0.0154757	0.0106154	-0.0125036	-0.0105434	0.0409572	-0.010636	0.110173	0.757582
Fntb	0.0165861	-0.00618587	-0.00240339	-0.0230407	0.0134604	-0.00809374	0.0439505	0.757545
Sdf4	0.00502709	-0.0382183	-0.0290953	-0.115643	0.125771	-0.00412982	0.130546	0.757434
Vdac2	0.0494062	0.0395431	-0.212302	0.0657549	0.235463	-0.0597798	0.136756	0.756363
Nbea	-0.0547605	0.00925922	-0.0311967	-0.0462741	0.0639298	-0.0178677	0.104288	0.756355
Ctsz	-0.0554481	0.0299115	-0.0349628	-0.0678277	0.0507619	-0.0501214	0.232976	0.756337
Cox7b	0.0365623	-0.00704097	-0.0395406	-0.0143409	0.154456	-0.0647946	0.147447	0.756244
Fbxw7	0.0514095	-0.00206136	-0.0279748	-0.00113509	0.01481	-0.0259337	0.0696938	0.755128
Mbnl1	0.0184627	0.0452832	-0.113128	-0.0146337	-0.0627465	-0.0324747	0.11731	0.754946
Phtf2	0.00818074	-0.00512259	-0.00333453	-0.0110406	0.00837866	-0.00791232	0.0183379	0.754812
Hdac5	-0.0325501	-0.00264745	-0.0450114	-0.00604096	0.0209242	0.00220674	0.0394372	0.754471
H2afz	0.0283638	0.0585917	-0.162275	-0.040733	0.373013	-0.115506	0.166692	0.754331
Samd4	-0.0129111	0.0509199	-0.0961638	0.011936	-0.0186678	-0.0170085	0.218177	0.754023
Idh3g	-0.0441828	0.00172626	-0.0361492	-0.0778812	0.0550469	0.0262706	0.070919	0.753929
Clybl	-0.0159366	-0.00701552	-0.0194611	-0.0148741	0.0569667	-0.00709701	0.0661876	0.753553
Cspg5	0.00232067	-0.0166396	-0.0148538	-0.0126965	0.0366312	-0.0128725	0.060941	0.753185
Atp1b1	-0.020062	0.00392815	-0.0312968	0.00312715	0.0327173	-0.00388814	0.110295	0.752681
Tbc1d25	-0.0055451	-0.00916171	-0.0110311	-0.00942878	0.00425811	-0.0120962	0.00317073	0.752171
Glud1	0.0903388	0.018388	-0.100694	-0.0265556	-0.00124461	0.0120083	0.0400619	0.752135
Slc25a32	0.00682864	0.0131487	-0.0121802	-0.00787553	0.00593751	-0.0130627	0.00384039	0.751663
Usp2	-0.0112105	0.00167447	-0.0256652	0.00686109	0.0259362	-0.000165414	0.0874423	0.751556
Fstl3	0.0603306	0.00560962	-0.0295807	-0.0205958	0.00115054	-0.0255348	0.0562425	0.751318
Dus3l	-0.0239738	0.0292858	-0.0191597	-0.0159651	0.00924545	-0.0202589	0.0783384	0.751252
Six4	-0.00170199	-0.0261109	-0.0220868	-0.0268163	0.0178746	-0.0172788	0.0744367	0.751231
Rab8b	-0.00569218	-0.0118187	-0.0525539	0.0154964	0.0413719	-0.0296751	0.0869551	0.750918
Gm20186	0.00476204	0.0036574	-0.0451277	-0.0189407	0.00933742	0.0178698	0.00222909	0.750632
Prpf18	0.00962097	0.00395524	-0.0376144	0.0236338	0.0295251	-0.0169451	0.0604515	0.750413
Fcgrt	0.0126829	0.0124524	-0.0385271	-0.00544189	-0.0224484	-0.00800887	0.0702741	0.749992
Snx1	-0.051437	0.0294572	-0.0687515	-0.00415185	0.00754698	-0.0374606	0.0817907	0.749973
Eif5	-0.0178465	-0.0636083	-0.0952292	-0.0398259	0.0786928	-0.0426222	0.340755	0.74981
Cgrrf1	0.0565471	0.0406676	-0.0716087	0.00513388	-0.0033093	-0.0115383	0.0403533	0.749415
Spopl	-0.0329208	-0.00763425	-0.0412778	-0.00922172	0.0136211	-0.00887332	0.0768247	0.749293
Pmp22	-0.0177754	-0.00543669	-0.0481604	-0.0159402	0.0296388	0.00930801	0.205933	0.749196
Ddx24	-0.0145202	-0.0373842	-0.0986382	-0.00835647	0.154964	-0.0395133	0.120596	0.748882
Rsu1	0.11363	0.00354161	-0.150702	0.0652026	0.0742459	-0.0576176	0.157738	0.74867
Zfp787	-0.0356747	0.0323203	-0.0210498	-0.0282732	0.0226006	-0.0260951	0.0565091	0.748007
Sos2	-0.00212022	0.0246343	-0.0226048	0.000215383	-0.00170399	-0.0135125	0.0888982	0.747917
Chpf2	0.00617637	-0.00170527	-0.0123855	0.00654216	0.0185681	-0.0120259	0.04473	0.747785
Ube2d3	0.0538275	-0.0459825	-0.128837	0.00503193	0.107617	-0.00529965	0.0726271	0.747782
Ubl4a	0.00740776	0.0216842	-0.0521713	0.0207262	0.0814215	0.0098836	0.0428249	0.747361
Tgfb2	0.0204973	-0.00803932	-0.0238757	-0.0147473	0.0663566	-0.0174512	0.0366867	0.747166
Slc12a4	-0.0120937	-0.0123702	-0.0303778	-0.0455223	0.0228124	0.0141634	0.0138697	0.746957
Dnajc22	0.0212801	-0.00386967	-0.0321223	-0.0193454	-0.00095139	0.00844637	0.0076198	0.746526
Zeb2	-0.0440027	0.0538849	-0.130913	0.08442	0.146828	-0.0374148	0.277374	0.746494
Ubr5	0.0324794	0.0307621	-0.164124	0.00648759	3.34647e-05	0.0672778	0.0821155	0.746341
Dclre1b	-0.000947871	0.00526979	-0.0054182	-7.00889e-05	0.00337568	-0.00111336	0.00188317	0.746102
Osgep	-0.0114375	0.0284311	-0.0684264	0.0116393	-0.0132433	0.00409514	0.128169	0.745842
Zfp110	-0.00974523	0.000636238	-0.027913	0.010696	0.0274965	-0.0101178	0.043853	0.745816
Ccnf	-0.0285117	0.00304129	-0.0163386	-0.0312265	0.00401604	-0.0170281	0.040688	0.745731
Extl3	0.00755696	-0.00276536	-0.0264726	0.00565822	-0.00197979	-0.00118163	0.0494231	0.74563
Orai2	-0.00477033	0.00832666	-0.00382461	0.00167936	0.0112319	-0.0015941	0.0154116	0.74548
Phf19	-0.00942158	0.00693071	-0.0142159	-0.00475093	0.0393466	-0.0131606	0.0299754	0.74542
Tgfbr3	-0.0292086	-0.0270656	-0.0425771	-0.0261643	0.0842489	-0.0373593	0.160112	0.745045
Olfm1	0.063161	-0.0908754	-0.0388374	-0.129693	0.20344	-0.0587945	0.308806	0.744976
Rdh5	0.130594	-0.0863073	-0.0463242	-0.0549027	0.180381	-0.0350509	0.333596	0.743635
Jdp2	-0.0422349	0.016878	-0.0314861	-0.0294103	0.040337	-0.00292423	0.0376121	0.743418
Slc41a2	-0.00438089	-0.0101467	-0.0195844	-0.0192263	0.0123528	0.0124555	0.0127594	0.743334
Rcor1	-0.0381551	0.0219411	-0.104288	0.0338918	0.0636611	-0.0457008	0.10459	0.743035
Cisd2	-0.00525779	-0.0102934	-0.119824	0.0194329	0.279329	-0.0215864	0.206157	0.742975
Snx5	-0.03433	-0.047435	-0.0657674	-0.069799	0.156132	-0.0527277	0.13678	0.742878
Med12	0.0175854	-0.00494957	-0.0166267	0.00854959	0.0120408	-0.00061534	0.0603321	0.742738
Gm15614	-0.00117241	-0.00505505	-0.00330813	-0.0149975	0.016958	-0.00592955	0.0190905	0.742692
Ogfod3	-0.0402818	0.00747421	-0.0439797	0.000227453	0.0395906	0.0049704	0.0858038	0.742664
Vps13b	0.000120883	-0.0137792	-0.0117315	-0.0442794	0.0261159	-0.0181936	0.0241599	0.742577
Uba5	-0.0106226	-0.0200422	-0.0158067	-0.0366856	0.0206013	-0.0147825	0.0827574	0.742533
Spata2	0.0213682	-0.00278294	-0.0154136	0.00894467	0.0437492	-0.00672364	0.0373582	0.741494
Parp2	0.00128704	0.0301201	-0.0697621	-0.000282127	0.0418508	-0.0324181	0.00845627	0.741353
Sh2b1	-0.00994214	-0.00989186	-0.0310898	-0.020629	0.0328892	-0.0170388	0.00456965	0.741291
Pomk	0.0175683	-0.00418321	-0.00535456	-0.0359719	0.0286391	-0.0257573	0.142659	0.741234
Mospd1	-7.06833e-05	-0.000556067	-0.00413397	-0.00609265	0.0142145	0.015234	0.0320792	0.740966
Natd1	-0.00436291	-0.00655832	-0.0128378	-0.015903	0.00536699	-0.0073439	-0.00467731	0.740619
Cars	-0.010645	0.0586171	-0.039832	-0.0935498	-0.00766649	-0.0244133	0.0249817	0.740557
Suv39h1	-0.0191179	0.0362812	-0.0201248	-0.0204564	0.0181885	-0.0257762	0.0275797	0.740423
Sema6d	-0.00292677	-0.0289366	-0.0263139	-0.0175306	0.0645599	0.0067735	0.0984216	0.740276
Mllt10	-0.0709321	0.0290971	-0.0946324	-0.0113225	-0.00718396	-0.0390494	0.0834745	0.740276
Inpp5a	0.0135306	0.00240445	-0.0120622	-0.0101817	0.00183907	-0.0209351	0.0729999	0.74025
Ncoa1	0.00315495	-0.0147753	-0.0189343	-0.014004	0.0321365	-0.0287157	0.106989	0.740077
Dbndd2	-0.00220366	0.000719827	-0.00454396	-0.0028886	-0.000734671	0.000659065	0.0164738	0.740007
Otud3	0.00232746	-0.000624543	-0.00278149	-0.00441648	0.0193081	-0.0104213	0.0239927	0.739947
Tdp1	0.000757828	-0.00441307	-0.0192674	-0.00879698	0.0635437	-0.0031326	0.0404432	0.739784
Susd6	-0.115444	0.042138	-0.0994828	-0.0167518	0.107451	-0.075662	0.282649	0.739751
Crls1	-0.00218744	0.0209254	-0.00498806	-0.0295101	0.0309266	-0.040541	0.05021	0.739348
Rrad	-0.0449711	0.038886	-0.0416175	-0.0260897	0.0057613	-0.0168685	0.0406819	0.739341
Atxn7l1	-0.0262827	0.0150227	-0.00548089	-0.0508807	0.0352127	-0.0260743	0.0746374	0.738928
Esyt2	0.0770643	-0.00164408	-0.0726443	0.00565688	-0.0148361	-0.0277442	0.154152	0.738829
Fbxw11	0.0197933	-0.00471763	-0.017282	-0.0129586	-0.00770482	0.00704861	0.0376224	0.738669
Mcfd2	0.0140021	0.0287206	-0.0320054	-0.0632433	0.0392932	0.0328787	0.0151951	0.738505
Jade1	0.0129729	0.0065953	-0.0560452	0.0347694	0.0274725	-0.0083083	0.0715045	0.737972
Nfkb1	-0.127268	-0.0316977	-0.351795	0.0871496	0.306385	0.0155153	0.364039	0.737949
Arl6ip5	0.0379001	0.0242981	-0.211579	0.0532934	0.148871	-0.0296831	0.076034	0.737117
Ddr2	0.109636	-0.0237528	-0.0864117	-0.0856477	0.0521203	-0.0643227	0.0362698	0.737114
Bcas2	0.0434963	0.0656001	-0.115399	0.00352889	-0.022978	0.0283263	0.0634288	0.736941
Rps27	-0.0579333	0.0354953	-0.192046	0.0403635	0.0785015	0.0237326	0.108381	0.736503
Rictor	-0.0603672	0.0286654	-0.100686	-0.0391274	0.152198	-0.0219874	0.0588004	0.736239
Fem1b	-0.00850737	-0.00861538	-0.0198376	-0.0135413	0.0629371	-0.0332519	0.153608	0.73594
Tbkbp1	-0.0125937	0.0116353	-0.0179022	-0.0075209	0.0198341	0.0044435	0.00931276	0.735822
Ntf5	0.00930029	-0.00088976	-0.00862556	-0.00951427	-0.00293777	-0.00849353	0.00558118	0.735711
Togaram1	-0.00597272	-0.0186007	-0.0171269	-0.0195805	0.0529755	-0.0198271	0.120499	0.735618
Nr4a3	-0.0365659	0.0296458	-0.0439852	-0.00455042	0.0195643	-0.00808591	0.0348238	0.735332
Klhdc1	0.00323071	0.00933344	-0.00605212	-0.0194628	0.0146746	-0.0069805	0.0038292	0.734992
Vamp4	0.0102302	-0.0178534	-0.0307567	0.00244261	0.0225393	-0.0118089	0.0289983	0.734801
Lnpep	-0.032747	0.0212452	-0.0460402	-0.0168802	-0.0169937	-0.0118533	0.100577	0.734276
Scn1b	-0.00171862	-0.00754373	-0.011696	0.000101598	0.0297681	-0.001002	0.0356859	0.733943
Siva1	-0.0319204	-0.0209658	-0.0761217	0.0231562	0.122492	-0.00647315	0.28055	0.73391
Mto1	-0.00625909	0.0126191	-0.00364876	-0.0335362	0.000773591	-0.0159262	0.0337536	0.733859
Nedd4l	-0.0147953	0.00248494	-0.0089921	-0.0282206	0.00206511	-0.00348347	0.0135915	0.733742
Rps6ka6	0.000600197	0.00452657	-0.00096016	-0.00347344	0.0330675	-0.00485523	0.0299098	0.733658
Slc30a7	0.0246605	0.00273634	-0.0237363	-0.0199036	-0.000576543	-0.02035	0.00676563	0.733633
Amigo2	-0.0348772	0.024967	-0.0419328	-0.00579213	0.00185316	-0.011157	0.114794	0.733603
Sgtb	-0.0142099	-0.00289261	-0.0152849	-0.00574248	0.00290139	-0.000155167	0.0273822	0.733595
Cbll1	-0.0101676	0.0034256	-0.00926597	-0.00422926	0.0618022	-0.016547	0.0970884	0.733499
Zfp212	-0.011592	-0.0069079	-0.00774586	-0.0159661	0.00552268	-0.00931306	0.0163531	0.733394
Ptgfrn	0.013012	-0.0228355	-0.0366822	-0.000959817	0.0147363	0.000594021	0.114199	0.733281
Usp20	0.00575881	0.000486441	-0.00568781	0.00893056	0.014966	6.19194e-05	0.0270232	0.732833
Snapc1	-0.0482373	-0.00943253	-0.104612	0.0371888	0.144559	-0.0565801	0.251401	0.732669
Ipo5	-0.0497971	0.0121142	-0.0786994	0.0252944	0.17423	-0.0567166	0.235496	0.732503
Yipf6	-0.00167254	-0.00700775	-0.00832686	-0.0163022	0.0350779	-0.0230323	0.0438062	0.732444
Ankrd33b	-0.0434968	0.0287201	-0.0684076	-0.0285255	-0.000977249	0.0426326	0.0706111	0.732441
Hectd3	-0.0130931	0.00161616	-0.00723453	-0.0123156	0.00721974	-0.00677537	0.0110691	0.732116
Dpagt1	-0.00488741	0.00822252	-0.0215852	-0.00248121	0.0277935	-0.0284737	0.0205664	0.732097
Tstd3	0.0090469	-0.00430214	-0.0069324	-0.0223424	0.00438422	-0.00969873	0.00737449	0.732089
Sh3bgrl	0.0504509	-0.0132385	-0.0166355	0.0272587	0.166854	0.0423938	0.182777	0.731742
Egln3	-0.077521	-0.0615057	-0.0535007	-0.217824	0.294948	-0.179158	0.653687	0.731624
Mis18bp1	-0.00686169	0.00544751	-0.0178013	-0.0188601	0.00614405	-0.0378219	0.0929875	0.731556
Retsat	0.00137188	0.00397466	0.000824785	-0.00219012	0.00805021	-0.00603778	0.015497	0.7315
Serpinf1	-0.0180856	-0.0149863	-0.019223	-0.0227947	-0.000424449	-0.00189128	0.0343075	0.731452
Med6	-0.00869927	0.00176208	-0.0318621	0.0248934	0.0986778	0.00344578	0.13104	0.731268
Prkab2	0.014172	-0.0111308	-0.0100626	-0.0138096	0.0098752	-0.0175634	0.024423	0.731033
Mycbp2	-0.00733715	-0.00130153	-0.0671986	-0.0377454	0.0614692	-0.0722167	0.00664941	0.731031
Sec23a	-0.0212724	-0.00854977	-0.0322587	-0.00588513	0.0248981	-0.00555296	0.120559	0.730814
Dock4	-0.0102233	0.0150813	-0.024762	-0.00438174	-0.00196935	-0.000857338	0.102128	0.730583
Zfp277	-0.0246428	-0.00068407	-0.0753566	0.0219058	0.176447	0.0338266	0.15652	0.730547
Snx9	-0.0502333	-0.0117742	-0.0769442	0.00962354	0.0635508	-0.00235319	0.215347	0.730259
Gm11361	0.142965	-0.0178924	-0.0415325	-0.100885	0.12305	-0.0645915	0.106536	0.730208
Acvr2a	0.000392967	-0.0056739	-0.00752627	-0.00758532	0.0270267	-0.019543	0.0601269	0.729982
Irx3	-0.00181271	-0.0230724	-0.0449099	-0.0213086	-0.0106075	0.0180598	0.0534821	0.72979
Sub1	0.0612607	0.0541239	-0.250489	0.0783225	0.153007	-0.0390491	0.0903839	0.729789
Pcnx	-0.0018156	-0.0154125	-0.0270145	0.00404549	0.0617819	-0.0146584	0.0764952	0.72963
Ppm1l	0.000187547	-0.0131565	-0.00703049	-0.0188205	0.0403208	-0.0130181	0.0548064	0.729164
Cstf1	-0.00451335	0.00426997	-0.00949216	-0.0314111	0.0296402	0.00125779	0.0122742	0.729135
Arl15	-0.000892236	-0.00343785	-0.00241457	-0.0173838	0.0134319	0.0112348	0.0453498	0.729013
Ggh	-0.0120197	0.0204934	-0.0148612	-0.0243048	-0.0106773	-0.00481919	0.0745177	0.728416
Cyc1	0.014487	-0.00129097	-0.0392583	-0.0622178	0.0633009	0.00601351	0.0066138	0.72817
Lima1	-0.0392117	0.00755437	-0.0645117	-0.00507507	-0.0134701	-0.0364393	0.100784	0.727337
Jarid2	-0.0178935	0.00622008	-0.0169922	-0.00240919	0.0374457	0.00489359	0.0355519	0.726844
Snx18	-0.00427526	0.011596	-0.00174917	-0.0311872	0.0346722	-0.0406664	0.116769	0.726837
Lin7c	0.00857028	-0.00106161	0.00174219	-0.0421764	0.0229974	-0.0248744	0.0556377	0.726662
Pgap1	0.00725977	-0.0163519	-0.0338576	-0.00347052	0.0198786	-0.00219502	0.0113733	0.72652
Melk	0.00603867	-0.0113619	-0.00979932	-0.030927	0.0290075	0.0174227	0.0323303	0.726317
Chac2	-0.000901408	-0.000803271	-0.00220128	-0.0254764	0.0266629	-0.0261968	0.0443018	0.726203
Nufip1	-0.0329041	0.00462904	-0.0640406	0.0240869	0.0660793	0.00653355	0.0940748	0.72617
Rbm17	0.00169457	0.0406816	-0.144925	0.0576905	0.0338486	-0.05577	0.102488	0.726159
Rps6ka3	-0.0291215	-0.00953011	-0.0266589	-0.0161856	0.0528945	-0.0290969	0.0733505	0.725531
Morf4l2	-0.0764448	-0.0033272	-0.0910599	0.00960348	0.182595	-0.00448666	0.22287	0.725436
Ccdc115	-0.00345611	-0.0184333	-0.0146825	-0.0259311	0.0537391	-0.0289348	0.152455	0.72536
Gch1	0.0263605	-0.0136816	-0.0624125	0.00547963	0.0156845	-0.0362167	0.0279172	0.725257
Dlgap5	0.0310638	0.0241869	-0.0637402	0.00118599	0.0229116	-0.0400835	0.0120075	0.725233
Rida	0.0216268	0.0171438	-0.0410198	0.00913885	-0.0144413	-0.00259825	0.0455401	0.725228
Tma7	0.0731942	-0.00750907	-0.00162981	-0.0044951	0.127129	-0.0540486	0.194931	0.725027
Sh3glb1	-0.00428014	0.0502744	-0.131545	0.0756959	0.0311176	-0.0276287	0.172767	0.724849
2700049A03Rik	-0.0169026	-0.00657286	-0.0165506	-0.0143246	0.0276709	-0.0198235	0.0266722	0.72478
Ell2	0.0184469	-0.00356952	-0.0730599	0.0525201	0.0613717	0.00862178	0.112123	0.724443
Rbfox2	-0.0268435	0.0386257	-0.0924525	-0.0277702	-0.0201528	0.0626376	0.0887278	0.72388
Frmd6	-0.0730004	0.01697	-0.0659927	-0.0194985	0.115298	0.00906626	0.107654	0.72384
Tmx1	-0.0636848	0.0124175	-0.0475664	-0.0766983	0.210278	-0.0549071	0.165904	0.723776
Klf9	0.0346369	0.0571836	-0.189666	0.088103	-0.0149882	-0.0217979	0.26167	0.723506
P4hb	0.0372263	0.00516959	-0.034878	-0.0651747	0.138377	-0.0699942	0.0653331	0.723073
Ankrd9	-0.0116626	-0.028617	-0.0487646	-0.0235793	0.183691	-0.0194327	0.157545	0.722802
4930402H24Rik	0.0134572	-0.00324198	-0.00869774	-0.0270659	-0.00289566	-0.0192936	0.0187718	0.722387
Zfyve21	-0.0339736	0.0112352	-0.0907331	0.0324778	0.0570065	-0.0150228	0.079824	0.722387
Sec24d	-0.0172303	0.0101769	-0.0742627	-0.0307933	0.0800926	0.0363197	0.020091	0.722314
Adam17	-0.0584692	0.0341908	-0.050582	-0.0398267	0.0202643	0.00835742	0.286935	0.722216
Cox7a2	-0.0387783	0.0100894	-0.0671395	0.0432239	0.196545	-0.0344063	0.289327	0.722181
Gm49085	0.00756627	0.00671114	-0.0121767	0.0062494	0.00162318	0.00230896	0.0101803	0.721681
Lgals7	0.177216	-0.0227796	-0.0449538	-0.073703	0.036803	-0.0906214	0.477306	0.721566
Cdkn3	0.0762482	0.0555478	-0.0815551	-0.0960924	0.0125925	-0.0328494	-0.00323993	0.721386
Twistnb	-0.0668318	-0.00809342	-0.0435199	-0.0401163	0.122317	-0.0637752	0.248529	0.72122
Relt	-0.00827263	0.000987906	-0.00749492	0.000409137	0.0108705	-0.00109766	0.0303398	0.720951
Ccdc66	0.0121897	0.00340637	-0.0167146	-0.0128716	-0.0127868	0.00439839	0.0182409	0.72095
Rgs2	-0.0825032	-0.0549191	-0.129458	0.000643909	0.131034	-0.0900968	0.318156	0.72068
Arl4a	-0.172824	-0.0250743	-0.164154	-0.0165008	0.258493	-0.0388688	0.404928	0.720377
Dcaf12	0.00840444	0.00193953	-0.0349215	0.00143282	0.0371795	-0.00967551	0.00851785	0.720302
Tango6	0.00265802	0.00317074	0.000180822	-0.00751903	-0.000750915	-0.00122432	0.0104293	0.720149
Micu2	0.11789	0.0287892	-0.0926491	-0.0241326	0.000545236	-0.0292206	0.0501345	0.720052
Pla2g12a	-0.0351972	-0.0522086	-0.115557	-0.0360935	0.223665	0.0341996	0.153558	0.720021
Lhfp	-0.0603634	0.026445	-0.111803	0.0727762	0.136179	-0.0220557	0.323608	0.719328
Nt5dc2	-0.0204846	0.0466903	-0.202184	0.0772947	0.188407	-0.0248439	0.122934	0.719259
Hacd1	-0.0936709	-0.00260541	-0.13561	0.0450282	0.140203	0.00948727	0.310029	0.718918
Pum2	0.0212448	-0.00658586	-0.0132215	-0.0366131	0.0606844	-0.0635425	0.269301	0.718819
Rab13	-0.0115097	0.00648551	-0.0936953	-0.0514187	0.328319	-0.042413	0.168925	0.718782
Ttc5	0.0511241	0.0388524	-0.0696346	-0.0258825	-0.026098	-0.0416424	0.028957	0.71861
Ext2	0.0278624	0.00876141	-0.0158885	-0.0038158	0.0440793	-0.0455995	0.0493192	0.718558
Pigu	-0.00189573	0.000158435	-0.0197301	-0.029401	0.0255469	-1.32436e-05	-0.000904327	0.718516
Pigyl	-0.00328238	-0.00794501	-0.00510668	-0.0427839	0.0367277	-0.0450242	0.0893545	0.71837
Tmed10	0.0483744	0.000626725	-0.0781728	0.0857988	0.102232	-0.028914	0.293564	0.718046
Flnc	-0.0462829	0.044781	-0.159469	-0.11315	0.0920646	0.0241111	-0.0282295	0.718042
Rrm1	0.00677178	0.0252056	-0.00517321	-0.0340798	0.101201	-0.0404482	0.0678132	0.717887
Matn2	-0.0899406	0.0445703	-0.0818812	0.00536061	0.0578024	0.001449	0.162049	0.717723
Ifrd2	0.022816	0.00158356	-0.000331239	-0.0102699	0.0637049	-0.0274604	0.0654841	0.717613
Mios	0.00778966	0.0122325	-0.0211453	0.00186148	0.00244949	-0.00257645	0.00388745	0.7174
Pdia6	0.0159374	0.00804703	-0.0983476	0.0670505	0.0712352	-0.040606	0.392791	0.716954
Tmem126a	-0.0283812	-0.00521814	-0.0111122	-0.0443922	0.0956949	-0.0180097	0.107241	0.716796
Ifrd1	-0.0689697	0.0333557	-0.202636	0.10703	0.230601	0.0422946	0.268051	0.716467
Ptbp2	-0.068658	0.0220634	-0.045253	-0.0593945	0.0286785	0.0290163	0.0806562	0.716274
Atp13a2	0.00552106	-0.0025189	-0.00237235	-0.00645199	0.0162122	-0.0157328	0.0308544	0.715498
Iqsec2	-0.0079985	0.0144266	-0.0226416	-0.00278162	0.0203802	0.00990298	0.00770648	0.715323
Zfp395	0.0708395	0.0279516	-0.0635192	-0.00969939	0.00545521	-0.0300663	0.0266412	0.715012
Nrde2	-0.0402199	0.0121034	-0.0326887	-0.016012	0.00428247	0.00301362	0.0515571	0.714527
2006-03-01	-0.0172018	0.00658908	-0.0461469	0.0233428	0.0220591	-0.00281515	0.0738042	0.714466
Aebp2	-0.012678	0.0141576	-0.06326	0.0225467	0.061955	-0.0588683	0.0714518	0.714438
Wls	-0.159145	0.0156655	-0.269497	-0.0204974	0.0546579	0.120537	0.240458	0.714404
Rps29	-0.0832998	-0.0271277	-0.0630753	-0.0336928	0.269232	-0.0654013	0.532574	0.71433
Dph7	0.0107211	-0.0123585	-0.0188874	-0.0012898	0.0497264	-0.00815094	0.0355246	0.713721
Slc39a13	0.0483022	-0.0267049	-0.0442879	-0.079717	0.191297	-0.0602557	0.0999684	0.713428
Anp32b	0.0568775	0.0461014	-0.0542573	0.0120761	0.213075	-0.0925534	0.129429	0.713128
Gm16685	-0.00465149	0.00654027	-0.0235924	0.0172363	0.0158409	-0.00938343	0.0638964	0.713084
Ccnd2	-0.0734085	-0.0827265	-0.0961749	-0.0703488	0.333896	-0.0811442	0.392883	0.713069
Wnt4	-0.0023402	-0.00183977	0.0015574	-0.0279522	0.0133028	-0.0100865	0.0484507	0.712987
Ak2	0.00428843	0.0138288	-0.0377715	-0.0167437	0.166938	-0.040481	0.0929255	0.712849
Umad1	-0.0141718	0.0195327	-0.0233913	-0.0203094	0.0419334	0.000562911	0.00910899	0.712611
Spg21	-0.0138732	0.031848	-0.0110734	-0.068338	-0.0165764	-0.00270621	0.102071	0.712602
Angptl2	0.0530068	-0.0535759	-0.0103234	-0.109131	0.164223	-0.0288316	0.166284	0.712525
Hspa4l	-0.0876841	-0.0537038	-0.102215	-0.0530577	0.100217	0.0675969	0.36132	0.712438
Klhdc2	-0.0898919	0.0847683	-0.0897576	0.0300593	0.0746349	-0.056281	0.362251	0.712352
Serpine1	-0.0853575	-0.0512439	-0.0811961	-0.146409	0.119643	-0.019009	0.065173	0.712113
Trappc6b	-0.0617061	0.0184098	-0.0765137	0.01435	0.248885	-0.0529967	0.241572	0.711959
Thbs3	-0.0116398	-0.009967	-0.0148335	-0.00243454	0.0433618	-0.00297672	0.0625341	0.711895
Nceh1	0.0257427	-0.00446149	0.00315695	-0.0269458	0.038078	-0.0210094	0.0510239	0.711768
Tubb6	-0.0405569	0.0305911	-0.0943134	-0.0202534	-0.0524481	0.00576964	0.142644	0.711655
Tec	0.0352699	-0.0217004	-0.0254702	0.0020242	0.0176419	-0.014894	0.0904919	0.711486
Ccnb2	0.0462436	0.0602027	-0.0440377	-0.0523996	0.0724283	-0.115437	0.0555328	0.711359
Apex1	-0.0436533	0.0747991	-0.116731	-0.0264077	0.156315	-0.00832505	0.0321921	0.711036
Rdh11	0.0270571	-0.01108	-0.0100065	-0.0473417	0.0761043	-0.0386802	0.0552614	0.710927
Lamtor3	-0.0323805	-0.0235693	-0.0910612	-0.0206762	0.128461	0.0280309	0.0680321	0.710805
Srsf5	-0.0169821	0.01289	-0.00160562	-0.0294981	0.0532935	-0.0445189	0.135799	0.710585
Tnfrsf22	0.0268482	-0.00126534	-0.0104738	-0.0203553	0.000447193	-0.0154353	0.0214039	0.7104
Ccdc88a	-0.107679	0.0713413	-0.0875879	-0.0807785	0.100374	-0.0374412	0.053656	0.710364
Atp5l	0.0767559	-0.0379668	-0.0572508	0.0253002	0.0579529	-0.0409113	0.254247	0.710351
Zc3h3	0.0147744	0.00771233	-0.012853	-0.0286704	-0.00246287	-0.00455075	0.00385073	0.709641
Slc39a6	-0.0269117	0.0249524	-0.0173555	-0.0124335	0.00434955	0.00711148	0.0762947	0.709509
Hccs	-0.00721716	0.0108623	-0.0195334	0.0163796	0.0145918	-0.00184715	0.0572967	0.709283
Adh5	0.0465308	-0.00930727	-0.151981	-0.0106008	0.183064	0.0188642	0.0390942	0.709245
Chrac1	-0.0564216	-0.0130239	-0.0455672	-0.0346051	-0.00428462	-0.0303714	0.0936971	0.709007
Znhit6	-0.046697	-0.000718088	-0.0317896	-0.0126884	0.0511475	-0.0190269	0.0864661	0.708864
Heatr5a	0.00241046	-0.0182817	-0.0048236	-0.0263421	0.0308268	-0.0178651	0.0721103	0.708574
Cpne2	0.0223142	-0.0186796	-0.00176126	-0.0364113	0.0618609	-0.0217503	0.0709861	0.708278
Fkbp1a	0.0266291	0.0303674	-0.0324638	0.0175176	0.122398	-0.0883423	0.130043	0.708079
Nbdy	-0.0501263	-0.00473702	-0.122252	0.0364801	0.0286024	-0.00407183	0.134783	0.707938
Ndufv3	-0.0510981	0.0051732	-0.094988	0.000642852	0.202632	-0.0632505	0.138953	0.707887
Psmd6	-0.0159828	0.0726862	-0.176311	-0.0102547	0.100257	0.000550341	-0.00100027	0.707728
Pfkp	-0.0850918	-0.0247538	-0.093341	-0.0249057	0.228286	-0.0353028	0.209017	0.707304
Wwtr1	0.0526154	-0.0365555	-0.100354	0.0396541	0.0374574	0.0478237	0.162091	0.707272
Xxylt1	-0.0166413	0.00749236	-0.00590944	-0.00334423	0.0379353	-0.00669172	0.056451	0.706696
Dopey1	0.000992492	-0.00500838	-0.00305599	-0.0089954	0.0115198	-0.0125815	0.0448279	0.706487
Gm15867	0.0136978	0.00807043	-0.0158689	-0.0276813	-0.0126122	-0.00545927	0.0085979	0.706292
Mbd5	-0.00729337	0.0189608	-0.028154	-0.0378977	0.0405548	-0.00995172	-0.0027605	0.705999
Pde4dip	-0.00100788	-0.00867902	-0.069605	-0.00778631	0.0314293	0.0579432	0.0494823	0.705944
Twist1	-0.307344	0.0141738	-0.246652	-0.00611709	0.443425	-0.11811	0.676386	0.705856
Ciz1	-0.0113524	-0.0179112	-0.0183699	-0.0477421	0.00267539	-0.0196677	-0.000782495	0.705776
Pxdn	0.00166983	-0.0453915	-0.0138345	-0.0658849	0.0954254	-0.0376874	0.135195	0.705676
Tmed1	-0.00274062	-0.0210488	-0.00590125	-0.0402498	0.0773847	-0.0467299	0.147092	0.705606
Mpp5	-0.0259098	-0.0161005	-0.0398947	-0.00106016	0.046778	-0.0430938	0.160363	0.705601
Tmem160	-0.0403962	-0.0778985	-0.0687738	-0.0332631	0.138714	0.0104859	0.284247	0.705577
Mtrf1	0.00837581	-0.000284048	-0.00451851	-0.0222042	0.00184352	0.00738398	0.0137176	0.705369
Prmt5	-0.0341133	0.0197701	-0.0258854	-0.016643	0.0590124	-0.0231146	0.0410815	0.704905
Mnat1	0.0774566	-0.0219532	-0.00973343	0.0245906	0.0900303	-0.00657789	0.184114	0.704854
Fut11	-0.0217413	0.0116537	-0.00769327	-0.0239231	0.00796852	-0.00633927	0.0257822	0.70484
Ndufb5	0.0599111	-0.0727838	-0.0579511	-0.0500349	0.169144	0.00312255	0.12569	0.704789
2310022B05Rik	-0.00826015	0.00853086	-0.00989148	-0.0145892	0.059126	-0.0546564	0.0964579	0.7047
Dnmt3a	-0.000657086	-0.00342315	-0.0133306	-0.009478	-0.00496648	-0.000861799	0.0613557	0.704693
5031425E22Rik	-0.031321	-0.0553538	-0.0470872	-0.0322205	0.0527113	-0.0175662	0.14073	0.704303
Zzz3	-0.0495876	0.00152132	-0.0337448	-0.00924332	0.040947	-0.00926315	0.118316	0.703819
Rfxap	0.0164952	-0.0269031	-0.0389239	0.0106685	0.0333237	-0.0178297	0.0605061	0.703684
Etfa	-0.00332159	-0.038935	-0.0416346	-0.0147616	0.088485	-0.0326412	0.0820781	0.703533
Bvht	-0.0137478	-0.00893088	-0.0178382	-0.00845335	0.0293527	-0.0167126	0.130033	0.703475
Fpgt	-0.00142322	0.00281166	-0.00541763	-0.0154588	-0.00336883	-0.00918258	0.00166471	0.703425
Retnlg	0.040718	0.00908502	-0.0231951	-0.00166846	0.0228479	-0.0181271	0.0174463	0.703337
Ccdc47	0.0164519	-0.00722266	-0.0156302	-0.0939665	0.0415773	-0.0249029	0.0258243	0.703114
Cnpy4	0.00625187	0.0331924	-0.0447608	-0.0331015	-0.0239997	0.025884	0.0290073	0.702985
Kif2a	-0.0322444	0.0145782	-0.0130671	-0.0298078	0.0466335	0.0285856	0.0648632	0.702645
Scd1	0.0656861	0.00765756	-0.022348	-0.037765	0.104761	-0.0548316	0.0548921	0.702355
Rps25	-0.0274773	-0.0201701	-0.0110761	-0.0717655	0.183627	-0.113417	0.358205	0.701747
Slc7a11	0.00633915	0.0216946	-0.0286613	-0.0100044	-0.0261319	-0.0187817	0.0493942	0.701736
Cul7	-0.0231873	0.0587702	-0.0568257	-0.0100523	0.00296885	0.0105381	0.0281816	0.701729
Snx6	0.052644	0.0171284	0.00532534	-0.0871202	0.248495	-0.165807	0.290142	0.701612
Rbmx2	-0.00380543	-0.0146893	-0.0206688	-0.035558	0.0207483	0.0381388	0.0575274	0.701553
Higd1a	-0.14627	-0.125272	-0.234637	-0.00716084	0.349917	-0.283439	0.693716	0.701423
Abhd6	-0.0103672	0.00591556	-0.0254453	0.0142285	0.0457096	-0.00956524	0.0417227	0.701349
Dnajc5	0.0561508	-0.0159409	-0.0439909	-0.0107465	0.172234	-0.0825351	0.127701	0.70128
Epc2	0.03776	0.014977	-0.00492921	-0.0277352	-0.00291927	-0.0389692	0.105073	0.701262
Anp32e	0.0424098	-0.00381637	-0.12178	-0.0337417	0.405926	-0.0425892	0.177454	0.701192
Ect2	0.0684901	0.0245583	-0.0561474	-0.0590495	0.00134498	-0.0668469	0.0175325	0.700582
Mtx1	0.128916	-0.0242283	-0.0866318	-0.0393027	0.0256289	0.0494735	0.0802328	0.700093
Cbr2	-0.0149906	-0.0180743	-0.0209532	-0.0108575	0.0135341	-0.0225827	0.0632831	0.699901
Cdkn1a	-0.00522371	-0.114208	-0.0826602	-0.0582699	0.129949	-0.021394	0.169351	0.69952
Dap	0.0299948	0.0479032	-0.324754	-0.0452511	0.109602	0.0841801	-0.00998642	0.699209
Klc1	-0.0235795	0.00127862	-0.118877	-0.0618417	0.242965	-0.00897835	0.0623742	0.698612
Nfic	-0.00536736	0.0299845	-0.0920775	-0.047054	0.0513975	0.0897889	0.0332834	0.698551
Psen1	-0.0309844	0.0103095	-0.0249574	0.00991263	0.0499161	-0.00647634	0.0831563	0.698239
Crim1	-0.053388	0.0103543	-0.0237398	-0.0191985	0.0754255	-0.0455112	0.169885	0.698199
Scai	0.00186661	-0.008676	-0.0127434	-0.0183201	0.0376058	-0.00934009	0.0153094	0.698182
Rassf8	0.0276312	-0.04047	-0.035993	-0.0441544	0.114627	-0.0218362	0.0667019	0.698031
Grap	-0.00590145	0.0449839	-0.0832656	0.00200565	0.0177128	0.0132148	0.0101907	0.697935
Fxyd5	0.32119	-0.0537075	-0.269893	0.00604277	0.284157	-0.0410411	0.148467	0.697888
Il1rap	0.0296252	-0.0172848	-0.00267175	-0.0293107	0.0432159	-0.0269297	0.0611592	0.697696
Slc7a6	0.015659	0.0205026	-0.00565891	-0.055966	0.0427756	-0.0448973	0.0296686	0.697613
Steap1	-0.0649098	-0.0199712	-0.0767535	0.0297398	0.226515	0.00958031	0.303073	0.69747
Lrif1	0.0146043	0.00371813	-0.0081167	-0.0805633	-0.0183665	-0.00956064	0.0841174	0.697373
Pla2g4a	0.00762137	0.0158524	-0.0692478	0.00411371	-0.0376261	0.0170108	0.119409	0.697279
Mtcl1	-0.0506952	0.030909	-0.0423952	0.0240963	0.0999882	-0.00956305	0.134355	0.697187
Nrg1	-0.0476847	0.0111952	-0.0350195	-0.0551987	0.130883	-0.0513211	0.081826	0.696961
Tom1	0.00208854	-0.0045428	-0.0203612	-0.0137263	0.0325947	-0.0154521	0.0045735	0.696746
Apopt1	-0.0433255	0.0133861	-0.0896501	0.0459653	0.0905048	-0.0151659	0.116031	0.696424
Golph3	0.0386494	0.0428024	-0.103474	0.0486012	0.131743	-0.014973	0.0517627	0.696354
Syde1	-0.0204226	0.00773561	-0.0145229	-0.0216728	-0.00129536	0.00371612	0.014976	0.696267
Capn7	0.0147328	0.0085674	-0.030782	0.0261642	0.0217102	-0.00666241	0.036173	0.695915
Sipa1l1	-0.073791	-0.0177729	-0.0351219	-0.04191	0.122099	-0.0535869	0.266133	0.695767
Lclat1	0.0620469	0.0139187	-0.0280111	-0.0111922	0.0245053	-0.0260192	0.0258166	0.695545
Cdc42ep3	-0.0645284	0.0172186	-0.0583218	-0.0143813	0.0126053	-0.0470929	0.224302	0.695461
Cux1	-0.00520601	-0.0228658	-0.0329532	-0.0186014	-0.00886743	0.0131544	0.058435	0.69545
Ddah1	-0.0147771	-0.000199384	-0.0372756	0.0131944	0.144508	-0.0380793	0.13123	0.695193
Slc2a8	0.00132327	-0.00407759	-0.0018662	-0.00272835	0.012703	-0.00756285	0.0336694	0.695136
Proser2	-0.00881699	-0.0219539	-0.0116789	-0.0278025	0.0367709	-0.000199468	0.0445514	0.695112
Gm17056	-0.045897	-0.054911	-0.0419626	-0.0532845	0.131476	-0.0319512	0.167342	0.694901
Itga5	-0.0376437	0.0116504	-0.103903	0.0403887	0.144821	0.0186561	0.106463	0.694871
Timp1	0.295399	-0.291275	-0.240293	-0.139322	0.568569	-0.112475	0.452722	0.694568
Eif2b3	0.0866321	-0.0250478	-0.0142285	-0.0196257	0.0261966	-0.020649	0.18806	0.694566
Btbd6	-0.0182335	0.0376348	-0.0326748	-0.0257448	0.0379857	0.0151543	0.00911219	0.694428
Slc30a4	0.0213481	0.218912	-0.144088	-0.101055	-0.0942344	-0.041816	0.130193	0.69426
Zbtb38	0.0194535	-0.0440676	-0.0734685	0.0524002	0.163553	-0.0480622	0.246308	0.694186
Pak1ip1	0.0419181	0.00249819	-0.0252513	-0.0478115	0.0140636	-0.0304207	0.00875988	0.694178
Etf1	-0.0377097	0.0193788	-0.0321831	-0.00101155	0.17034	-0.0477023	0.157509	0.694125
Vcpkmt	0.00759138	-0.040841	-0.0121098	-0.115017	0.198351	-0.0534198	0.165439	0.693911
Psmd1	0.0450646	0.0372197	-0.0878824	0.0610801	0.0711345	-0.0278293	0.0668102	0.693884
Atp6v1c1	0.00976297	-0.0220999	-0.107432	-0.0398789	0.00950624	0.14474	0.228095	0.693799
Oxsr1	0.00878281	0.0116655	-0.0127769	-0.0191788	0.0125846	-0.0360539	0.215965	0.693783
Nadk2	-0.0463802	-0.00664389	-0.0628633	0.0137268	0.0335044	-0.0109231	0.0875388	0.693406
2410015M20Rik	0.0884128	0.0165511	-0.104085	-0.00933036	0.195625	-0.0190453	0.0411525	0.693202
Racgap1	0.0702128	0.0662961	-0.0745147	-0.0222077	0.00799624	-0.0723915	0.0285449	0.693136
Epha1	-0.055434	0.0239403	-0.074445	0.032115	0.0413033	-0.0390549	0.15873	0.693114
Ndrg3	-0.00318392	-0.00718937	-0.00165249	-0.0187394	0.0156951	0.0111563	0.056637	0.692921
BC055324	0.0143125	-0.00634669	-0.0126688	0.000259748	0.0226929	-0.0145555	0.018191	0.692625
Dnajc15	0.0677398	0.0703103	-0.140035	-0.0578784	0.0183589	0.0103032	-0.0199237	0.692602
Ankrd46	0.00696101	0.00209082	-0.0159388	0.00338611	0.011822	-0.0278215	0.0268496	0.692232
Rnaseh1	-0.025862	-0.00456967	-0.0087113	-0.0258649	0.0672275	-0.00832471	0.0738268	0.691789
Tmem251	-0.0576935	0.0146888	-0.0565916	0.00239364	0.0658007	-0.0355127	0.0726717	0.691663
Mrps28	-0.0260598	0.0976935	-0.120743	-0.0211269	0.0157445	0.0338574	0.0238771	0.691648
Creg1	-0.0204795	-0.037071	-0.0353469	-0.00483055	0.0975723	-0.0219527	0.148662	0.691427
Adgrl1	0.000849958	-0.0157454	-0.00490505	-0.0148745	0.0882124	-0.0338864	0.127254	0.691394
Zfp189	-0.00700631	0.000333642	-0.00535683	-0.0115965	0.0047151	0.0117027	0.0239787	0.691204
Hmmr	0.0453996	0.0586923	-0.0912534	-0.111221	0.0579769	-0.105638	-0.021192	0.691112
Helb	-0.0216451	0.033602	-0.0240853	-0.0367393	0.0194683	0.006177	0.0089765	0.690544
Ddx28	0.00560897	-0.0123428	-0.00472396	-0.00679566	0.0186742	-0.0113024	0.0511697	0.690414
Icam1	-0.149785	0.0727215	-0.168735	0.0594456	0.0952261	-0.026874	0.293215	0.690064
Snx30	0.0189399	-0.00611529	-0.00375449	-0.0174459	0.00887205	-0.00529433	0.0164544	0.690004
Zfp984	0.00727138	-0.00568034	-0.00440278	-0.0179109	0.000653918	-0.00897504	0.0728801	0.689832
Pla1a	-0.0285458	0.0424304	-0.0453482	0.0360044	0.0384657	-0.0260013	0.111973	0.689753
Tspan5	-0.0296315	0.0298005	-0.0481274	0.0269728	0.0189698	0.0212565	0.109749	0.689073
Ndufa8	0.066625	0.0114398	-0.0417673	-0.0230219	0.0668974	-0.0611452	0.0300124	0.688855
Dbr1	-0.00103837	0.00244851	-0.0156159	-0.0524553	-0.028322	-0.0157224	0.0820812	0.688447
Stard7	-0.0193127	0.0125205	-0.0187063	0.00332134	0.0188257	0.0092407	0.0292073	0.688202
Pccb	-0.00425647	-0.0073351	-0.00667727	-0.026598	0.00648705	-0.00432474	0.00556929	0.688084
Emc2	-0.0244461	-0.0188884	-0.0640806	0.0125048	0.139465	-0.0766747	0.143297	0.687764
Dnajc3	0.00117216	0.0530646	-0.0886163	0.00891872	-0.00324432	0.0506774	0.0509943	0.687492
Pdss1	-0.0304456	0.0158423	-0.0442564	-0.0345665	-0.00401525	-0.00150396	-0.00739705	0.68739
Mipep	-0.00545839	0.00726998	-0.00515188	-0.0142618	-0.00656281	-0.0119153	0.038941	0.686835
Efcab11	0.0153979	-0.00152268	-0.0104281	-0.00557043	0.019842	-0.00662601	0.00585795	0.686774
Zfp503	-0.0963718	0.0683934	-0.307483	0.0604994	0.0628245	0.0856274	0.153682	0.686754
Raly	-0.0137995	0.0300905	0.00433092	-0.0240376	0.0529866	-0.0139403	0.0468303	0.686736
Fam160b2	0.0428967	0.0104814	-0.01344	-0.0121666	0.0114651	-0.00893855	0.0174842	0.686254
Mbip	-0.0304548	0.0171055	-0.0459089	0.0268979	0.0472003	-0.0388514	0.101797	0.686201
Ebp	0.0909825	0.00556184	-0.121624	0.0288089	0.181929	-0.0185411	0.0576732	0.686088
Ttk	0.000298615	-5.83834e-05	-0.0104964	0.00585097	0.028001	-0.025232	0.050593	0.685916
Rpl15	0.0206805	0.0306396	-0.217414	0.0560545	0.201733	0.0202584	0.0631787	0.685878
Mapre2	-0.0420126	0.0643359	-0.0457599	-0.0731923	0.0473374	-0.0292402	0.00851868	0.685826
Arhgap11a	0.0474952	-0.00825239	-0.0187175	-0.031167	0.108276	-0.0232259	0.0492784	0.685779
Esd	-0.0167606	0.0447382	-0.255374	0.119429	0.190914	-0.0359721	0.143446	0.685024
Dpm3	-0.0433122	0.0167748	-0.0821089	0.031137	0.0415247	-0.0239571	0.0724425	0.684901
Atp8b2	-0.0150149	0.020171	-0.0549109	-0.00133616	-0.0184152	0.0344363	0.0752774	0.684898
Pisd	-0.0221511	0.0121171	-0.0116611	-0.03971	0.0523141	-0.0135006	0.0251315	0.684619
Idh1	0.0093246	-0.0611274	-0.0200601	-0.0723145	0.197215	-0.0166692	0.183305	0.684611
Khk	0.0188276	-0.00907206	-0.0174286	-0.030185	0.054695	-0.0146979	0.0159318	0.684396
Nav3	-0.0224591	-0.0297594	-0.0552253	-0.0372488	0.0734933	0.0125297	0.0264557	0.684051
Tns3	-0.0707482	-0.00708627	-0.0756694	-0.0091354	-0.00337279	-0.0585011	0.121723	0.683982
Cbl	0.000420618	0.000268277	-0.0152367	-0.0227797	-0.0183532	-0.00883735	0.0792894	0.683858
Hnrnph2	0.0641351	-0.0205746	0.00080774	-0.0626596	0.0473016	-0.040645	0.0917561	0.683812
Pclaf	0.160577	0.0753607	0.00918734	-0.088913	0.182584	-0.159208	0.182535	0.683805
Eif3l	0.0594007	-0.0154169	-0.0180536	-0.138573	0.0140532	-0.00595398	0.0678817	0.683751
Ints9	0.0100447	-0.00130375	-0.00952328	-0.0182663	0.044376	-0.00269391	0.0137834	0.683701
Ncaph	0.0328221	-0.00341658	0.00520828	-0.0289913	0.023117	-0.0223958	0.0540833	0.683653
Nod1	0.021326	-0.0129335	-0.015587	-0.0167609	0.0277176	0.0114249	0.0156554	0.683443
Nampt	-0.063217	0.0191802	-0.0343682	-0.0175586	0.1237	-0.121229	0.307578	0.682862
Ssr3	0.130402	0.0406986	-0.152776	0.0862432	0.0378066	-0.0117195	0.123117	0.682634
Map4k4	0.131417	0.0109099	-0.167463	0.061138	0.0929003	-0.0396188	0.077898	0.682621
Dhx35	-0.00306018	0.00885636	-0.00334514	-0.00796368	0.0113471	-0.00552058	0.0040113	0.682571
Skp2	-0.0125614	0.0405951	-0.0116018	-0.0240198	0.0269173	-0.0307987	0.0243796	0.68255
Shcbp1	0.0290926	-0.0142743	-0.0389251	0.0256287	0.0712388	-0.0437968	0.0859586	0.682216
Dlat	-0.0194191	0.0287379	-0.00288913	-0.00648742	0.0376482	-0.0320203	0.0755857	0.682162
Capza1	0.0491895	-0.00911021	-0.101222	0.0384912	0.0435878	0.0412614	0.0661573	0.681778
Utp18	-0.00708891	0.0236967	-0.00502463	-0.0618444	0.0685648	-0.0316203	0.0334315	0.681638
Jpx	-0.00291151	0.00817077	-0.00525207	-0.0104333	-0.000175592	-0.00211987	0.00118747	0.681629
Impa1	-0.0652221	0.0039654	-0.0471671	-0.0925336	0.253773	-0.01791	0.14631	0.681158
Plk2	-0.0918788	0.0111541	-0.0584509	-0.0918482	0.0345304	0.0176004	0.0505733	0.680796
Efnb2	-0.03762	0.00718747	-0.0369793	0.00276585	0.106788	-0.07294	0.135253	0.680279
Yme1l1	-0.0771259	0.00659397	-0.0815512	-0.0365302	0.017242	0.0409302	0.0653112	0.679704
Vwa8	-0.0109274	0.0268618	-0.0214349	-0.0238877	0.010034	-0.0157093	-0.0011239	0.67966
Daam1	0.0135155	-0.006583	-0.011379	0.0182125	0.0430278	-0.0201372	0.097106	0.679489
Itga7	-0.00445954	-0.00626699	-0.000603085	-0.0178562	0.0151501	-0.0149613	0.0696415	0.679283
Cst3	0.20014	-0.0288005	-0.244166	0.0207155	-0.0381145	-0.127048	0.177931	0.679263
Prkar2b	-0.0226508	0.0290507	-0.0367162	0.0209832	0.0240479	-0.0196592	0.263018	0.679193
Cd300lf	0.0191998	-0.00032587	-0.0136062	-0.00995683	0.0101523	0.0150469	0.0083862	0.679136
Tpp1	-0.037811	0.00665601	-0.0323103	-0.0132688	0.0127003	-0.00607697	0.214631	0.678941
Glipr1	0.0345001	-0.016346	-0.0980578	0.0571833	0.00878293	0.00550133	0.172177	0.67876
Nek1	0.00110168	-0.0108529	4.56512e-05	-0.0239364	0.0233034	-0.0213206	0.0464161	0.678642
Ica1	-0.0182012	0.0074712	-0.0229542	-0.00310275	0.0844454	-0.0266892	0.0565663	0.678559
Nemf	-0.00635024	-0.0213605	-0.0422174	0.0337644	0.147787	-0.0596731	0.220163	0.678448
Rad51	0.00258659	0.0425322	-0.0139359	-0.0237432	0.0540689	-0.0188964	0.0134797	0.678326
Cdca2	-0.0178484	0.000895684	-0.0275126	0.00471099	0.0213938	-0.0282038	0.0300433	0.678169
Pabpc1	0.00694029	-0.0092884	-0.00255698	-0.00772151	0.100133	-0.0185634	0.0945105	0.67783
Eno2	-0.0363932	-0.0308756	-0.0311967	-0.00991781	0.079074	-0.00293606	0.137893	0.677718
Khnyn	-0.0145221	0.0240655	-0.0196557	-0.0093792	-0.00894429	-0.0108754	0.0202541	0.677712
Ap1s2	-0.0124245	-0.0026616	-0.0278669	0.0303328	0.0662895	-0.0230416	0.155715	0.677548
Gpalpp1	0.0104597	0.00654015	-0.0369184	0.0153765	-0.0059948	-0.0339125	0.0673174	0.67747
Pxdc1	0.0234296	-0.0129431	-0.0283612	0.017304	0.0845838	-0.0163142	0.063557	0.677307
B230354K17Rik	-0.0179664	0.000360298	-0.00338332	-0.0220512	0.0396189	-0.0158202	0.0419832	0.677293
Zfp808	0.00239113	-0.00154851	0.00238828	-0.00512867	0.00939453	-0.00359448	0.018858	0.677184
Rps27rt	0.0497578	0.0373908	-0.0754138	0.00780026	0.0567049	0.0547468	0.0183032	0.677069
Gpatch2l	-0.00539288	0.00443543	-0.00544233	0.0032976	0.0131671	-0.0142543	0.0403334	0.67658
Rab10	-0.0255726	-0.0206509	-0.0241372	-0.0210666	0.109821	-0.102609	0.271479	0.676404
Gm26652	-0.010707	-0.00246079	-0.00426639	-0.0213637	-0.00279294	-0.00553973	0.0320519	0.675984
Emp3	0.282779	0.114628	-0.358022	0.0285262	0.0720814	-0.0652265	0.0588201	0.675784
Masp1	0.0281936	-0.0130068	-0.0103547	-0.0245433	-0.00421941	-0.0176974	0.131428	0.675106
Ubash3b	0.0328533	-0.0180611	-0.062435	0.0236226	0.0714937	0.0122333	0.0445815	0.674865
Plod2	-0.0732314	-0.0362251	-0.0789445	0.0184041	0.185775	-0.127172	0.417346	0.674725
Gle1	0.0129258	0.0181553	-0.0122065	-0.04622	0.00061733	-0.0192971	0.00538725	0.67447
Sdc2	-0.115889	0.125411	-0.280559	0.125452	0.149073	-1.75358e-05	0.201845	0.673942
Rbsn	-0.0154816	0.0133087	-0.00600609	-0.00132015	0.00913493	-0.00418423	0.0647346	0.673423
Cks2	-0.0914394	0.0181163	-0.0903811	-0.00646669	0.0797984	0.0291507	0.0905824	0.673201
Pear1	-0.0262652	-0.00680736	-0.0510971	0.012026	0.00375559	0.0118754	0.0897205	0.673105
Bnip3	0.0103737	-0.0236396	-0.167861	0.0554224	0.0011193	-0.182369	0.376938	0.67301
Spg20	0.0209077	0.0100893	-0.0207827	0.0148852	-0.00246137	-0.00944113	0.0384586	0.672943
4930579G24Rik	-0.0115381	0.000786873	-0.004527	-0.000424993	0.0327678	0.00309427	0.0393798	0.672924
Mettl5	0.0310739	0.0102656	-0.0325946	0.0228381	0.0209239	-0.0302287	0.0419308	0.672901
Mical2	0.0267357	0.00817558	-0.0676835	0.0223854	-0.0166166	-0.00783475	0.0536199	0.672864
Idh3b	-0.0478933	-0.00602778	-0.0236809	-0.0818738	0.0536528	0.0535804	0.0996593	0.672563
Stard13	0.00551945	0.000354393	-0.00810949	-0.0120167	0.00962479	-0.0163646	0.00160729	0.672263
Rrbp1	0.010647	-0.0135616	-0.0170081	0.00525322	0.139423	-0.0892809	0.206455	0.671716
Rpl36a	-0.0586299	-0.0155215	-0.0702487	0.0537227	0.236778	-0.0341639	0.308243	0.67131
P3h1	-0.0216591	0.00490666	-0.0238393	0.00799555	0.0571528	-0.00323413	0.0470045	0.671129
Bzw2	-0.0797657	-0.0412702	-0.0779942	0.0303456	0.257241	-0.0879217	0.405089	0.67051
Kifc1	0.0389575	-0.000648059	-0.00570427	-0.0598916	0.0056018	-0.0323883	0.0388349	0.670281
Rps7	-0.06357	-0.0907295	-0.023289	-0.100419	0.369996	-0.119521	0.505698	0.670095
Rpl8	0.0361151	0.0105669	-0.155311	-0.0642634	0.119328	0.0502379	-0.0218919	0.669965
Pik3ca	0.0047408	-0.0117809	-0.0377898	-0.0502174	-0.0482811	-0.0125405	0.0406862	0.669789
Pabpc1l	0.00792008	0.0041399	-0.0146046	-0.0169093	-0.0063357	0.00535382	0.00139942	0.669752
Nop56	-0.0541115	0.00380008	-0.0357468	-0.089337	0.17617	-0.0688164	0.0942332	0.669714
Rrm2	0.00112936	-0.042036	0.0115503	-0.178874	0.419069	-0.12399	0.359342	0.669532
Wisp1	-0.0278441	0.00456955	-0.058368	0.0193087	0.0112394	-0.031709	0.281055	0.6692
Sh3kbp1	0.0312056	-0.0389921	-0.0537863	-0.0589109	0.153808	-0.0352177	0.0508297	0.669015
Cdca4	-0.0312162	0.0514056	-0.0773283	0.045053	0.0115911	-0.0293959	0.11161	0.668778
Polr3c	0.0126467	0.0263951	-0.0328037	-0.0389745	0.06557	-0.0228232	-0.00362852	0.668597
Phf20l1	-0.0162214	-0.00838432	-0.0097714	-0.06718	-0.0161505	-0.0321346	0.0621737	0.668565
Spata6	-0.0329411	0.026439	-0.0381691	-0.0255632	0.050315	0.00334111	0.00941851	0.668434
Ankrd24	-0.00740057	0.00460105	-0.00419594	-0.0262813	-0.00664921	-0.0125731	0.0156227	0.668349
Rpl12	0.0499073	-0.00146013	0.0124843	-0.0901655	0.103876	-0.0748199	0.104097	0.668304
Lsmem1	-0.00832776	-0.0265732	-0.0114494	-0.0235139	0.0792326	-0.0167772	0.0804707	0.668018
Immp2l	-0.0139006	0.0177069	-0.00505664	-0.0120803	0.0483073	-0.0249651	0.036971	0.66801
Fig4	-0.00437127	0.000539268	-0.00139681	-0.0178243	0.00866059	-0.00259583	0.00704153	0.66778
Slc6a8	0.00635027	-0.0203506	-0.00237419	-0.0143446	0.0697755	-0.017376	0.0817451	0.667513
4933404O12Rik	-0.000929293	0.00449693	-0.000685189	-0.0192408	0.0259848	-0.0109759	0.0132614	0.667482
Sgsm3	0.000910864	-0.00718274	-0.00887583	-0.0173772	0.00640396	0.00717804	0.00506911	0.667392
Bicd2	-0.00439583	0.0212694	-0.0099803	0.00937839	0.0099787	-0.020136	0.0438079	0.667272
Pafah1b2	0.02884	-0.027306	-0.0479893	0.000940691	-0.0162907	-0.0257919	0.151095	0.66722
Ticam1	-0.000826593	-0.00657266	-0.00913051	0.000679961	0.0163378	0.00455424	0.0139256	0.667162
Ankrd50	0.00511303	-0.000739889	-0.0330149	0.0227691	0.0064862	-0.0209409	0.0715876	0.666635
Haus5	0.00364406	0.0136596	-0.00537715	-0.00387545	0.00774251	-0.0132287	0.00671959	0.666109
Rbbp9	-0.0137402	-0.00533492	-0.0118732	0.000694775	0.0133279	-0.00387689	0.06029	0.665666
A430105I19Rik	-0.000402816	0.000218186	8.87631e-05	-0.000452095	0.00431489	-0.00351447	0.0149343	0.665539
Slc38a6	0.00918871	-0.0038993	-0.00383406	-0.0271419	0.00912315	-0.00488046	0.00729195	0.665111
Nacc2	0.00666121	-0.00877985	-0.00130434	-0.0141008	0.00535704	0.00897088	0.0513121	0.665096
Riox1	-0.0202518	0.0218233	-0.0104037	-0.0140075	0.0341365	-0.0198974	0.0231729	0.665068
Hps5	-0.00781949	0.00129597	-0.00693525	-0.0231798	0.00706931	0.0115788	0.0123019	0.665036
Zfp599	0.00362156	-0.00315346	-0.000985513	-0.00443107	0.00722214	-0.00723794	0.00975596	0.664956
Strn3	-0.00810168	-0.0342274	-0.0202183	-0.028216	0.0218766	0.00433565	0.193296	0.664734
Stag1	-0.0420169	0.0134317	-0.0227237	-0.0555005	-0.014091	-0.0157561	0.0248372	0.664642
Setd3	0.0573483	0.0314682	-0.104601	0.0592307	0.0528442	-0.0260085	0.0541381	0.664622
Fam173b	-0.0486199	-0.000113777	-0.0765538	-0.0301725	0.0837221	0.0132626	0.0166087	0.664616
Nup188	-0.0220676	0.00422674	0.000532447	-0.0315064	0.016431	-0.0155268	0.0524086	0.664194
Leng1	-0.0110506	0.0035593	-0.0240158	-0.00381445	0.0397467	-0.0158743	0.0112848	0.664173
Sec22b	0.0118487	-0.0183899	-0.038037	-0.00402687	0.154443	-0.0260559	0.0857206	0.664018
Tnfrsf9	-0.0600378	-0.0308513	-0.0466714	-0.019749	0.0412118	-0.0440386	0.251083	0.664002
Praf2	-0.0217145	-0.000333766	-0.0152108	-0.0142688	0.00813081	-0.0252122	0.140727	0.663825
Xdh	0.0252939	-0.0207417	-0.165432	0.116492	0.102419	0.033562	0.197014	0.663526
Arhgap5	0.110793	-0.0702339	0.0110096	-0.117398	0.113752	-0.0869779	0.243054	0.663311
Spop	-0.00182838	0.0302532	0.0142681	-0.0503627	0.0321741	-0.0402212	0.0714973	0.66302
Cox6b1	0.0880794	0.0351844	-0.0314068	-0.0250344	0.00102224	0.0311218	0.0426942	0.662987
Ino80dos	-0.00302685	0.00111785	0.000243742	-0.0065166	0.00284804	-0.00478016	0.00802722	0.662858
Map3k20	0.0685122	-0.00579737	-0.00975661	-0.0068094	0.00658508	-0.0258402	0.110443	0.662737
Fgfr1op2	-0.00293249	0.077802	-0.0685959	-0.0563962	0.0723668	-0.0639973	-0.0101966	0.662639
Polr3f	0.0125191	-0.000843807	-0.00318578	-0.0318515	0.00905647	-0.0171222	0.0112969	0.662619
Zfp672	-0.00446809	0.0118703	-0.00183401	-0.0156127	-0.000595341	0.00799389	0.0175971	0.662614
Pick1	0.00411051	-0.00348032	-0.0189188	-0.0581712	-0.0333432	-0.0264721	0.191374	0.662163
Cenpp	0.00346882	0.0156361	-0.00176898	-0.0285193	0.0144769	-0.0177912	0.00978101	0.66208
Syne3	0.0231188	-0.0122886	-0.0184848	-0.00557959	0.00653804	-0.0373597	0.0447645	0.661829
Celf2	-0.0821232	0.021685	-0.0595974	0.000348978	0.108179	-0.0625672	0.119186	0.661299
Erp44	-0.0333514	0.0283326	-0.042042	0.0131842	0.0262053	-0.0420754	0.05451	0.660921
As3mt	0.00529901	-0.017147	-0.00256461	-0.0310735	0.0104444	0.00200957	0.140953	0.660858
Tanc1	-0.0373194	0.0116838	-0.0255582	-0.017282	-0.0110276	-0.00515876	0.0877175	0.660822
Adam15	0.00305081	-0.00838015	-0.0753046	0.012018	-0.0280862	0.0356629	0.140814	0.659745
Nifk	-0.0260727	0.047362	-0.0233704	-0.0161614	0.0196005	-0.0109915	0.0205169	0.659738
Acp6	-0.0183787	-0.00886606	-0.0461146	0.00494362	0.00785146	0.0183969	0.0346425	0.659688
Nusap1	0.0133685	-0.0134614	-0.0588293	0.00223502	0.0364868	-0.10911	0.0844214	0.659481
Zfp87	0.0221826	-0.00256859	0.00368408	-0.00457848	0.0108873	-0.000399212	0.0306353	0.659418
Timp2	-0.02085	0.0135003	-0.153012	0.12477	0.105313	-0.0818618	0.258127	0.659279
Man2c1	-0.0103246	-0.0233018	-0.0187174	-0.0125348	0.0505804	0.00703398	0.0460305	0.659257
Enpp4	-0.0507745	0.0207875	-0.0366773	-0.0342428	0.062281	0.0541745	0.0641858	0.658856
Golm1	-0.0258158	-0.00550474	-0.0360253	0.0259427	0.0460236	-0.00536441	0.102016	0.658749
Myo5c	-0.0133623	0.00451459	-0.0277759	-0.00538733	-0.00759362	0.0257695	0.051776	0.658315
Msto1	-0.00456112	-0.013994	-0.00820695	-0.0787608	0.0593905	0.0256328	0.0488838	0.658266
Rpl36	0.0351897	-0.0511015	-0.0315293	-0.0492817	0.204343	-0.0673841	0.135986	0.657881
Tgds	0.0675958	0.00487074	-0.0502535	-0.0240075	0.0202854	-0.00847455	0.00541017	0.657833
Dcaf10	0.000145251	0.0112905	-0.00899561	-0.0279943	-0.0102301	-0.0251462	0.202689	0.657664
Pdhx	-0.00992952	-0.000572845	-0.00598767	-0.0133717	0.0410488	-0.0151605	0.0265303	0.657186
Kif20a	-0.0214018	0.025271	-0.0321565	-0.0333551	0.125562	-0.0633714	0.0516541	0.657156
Pias3	-0.00710675	0.00646495	-0.0115322	-0.0585675	0.0173402	-0.0126902	0.0029702	0.657113
Eif3j1	-0.0319957	0.0037343	-0.00150946	-0.0648562	0.00436921	-0.00377192	0.0898902	0.657112
Me2	0.00841106	-0.00289002	0.00721973	-0.00972537	0.0450014	-0.0373147	0.117371	0.657096
Ndufa5	-0.041017	0.0288387	-0.118862	0.0406782	0.175366	-0.0546252	0.0838471	0.657071
Atf2	-0.0214448	0.0198358	-0.0358196	-0.0110601	-0.0275495	-0.00339338	0.0426438	0.656993
Zdhhc20	-0.00982477	0.0612133	-0.066252	-0.0129448	-0.033428	-0.0413814	0.0337214	0.656861
Acox3	3.98943e-05	-0.00439441	-0.00188795	-0.0167212	0.0164308	-0.000522157	0.00931725	0.656286
Rasa2	-0.0847569	-0.0223277	-0.064725	0.00296748	0.0797717	0.0240721	0.209284	0.656229
Ttc28	-0.0429947	-0.00169973	-0.0255995	0.00451724	0.0842179	-0.018979	0.105426	0.656156
Slc9a1	0.0130864	0.0220938	-0.0274317	-0.0250425	0.00978	-0.0276849	-0.00793876	0.656155
Rnf113a1	-0.0127225	-0.00308582	-0.00507169	-0.00568934	0.0333707	-0.0169034	0.0427772	0.65611
Spryd4	-0.00829254	0.0031067	-0.00287145	-0.0133581	0.0124391	0.00600818	0.0105179	0.656
Ninj1	-0.00675027	-0.00752442	-0.039544	0.0167225	0.0864512	-0.00822854	0.0524973	0.655853
6030458C11Rik	0.0683546	0.00994594	-0.029608	-0.0530922	0.0303566	0.00387975	0.00911544	0.655781
Hdac10	-0.00667065	0.00613351	-0.00439817	-0.00399086	0.0137677	-0.00113091	0.00604184	0.655732
Ufm1	0.0118339	0.0232448	-0.0416806	-0.0188909	0.0261147	0.0335853	0.00015415	0.655723
Clip1	0.0290972	0.02077	-0.0294447	-0.0158898	-0.0211153	-0.0399989	0.03128	0.655643
Thnsl1	-0.00272403	0.00909231	-0.0101233	-0.0224075	-0.00193743	-0.0138875	-0.00276612	0.655595
Nicn1	-0.0178702	-0.00687579	-0.00294035	-0.0372921	0.00548075	0.00273802	0.102223	0.655452
Strip1	-0.00478202	-0.0142982	-0.0136488	-0.00185942	0.017192	0.0172583	0.0518253	0.655423
Cep76	0.012126	0.00827218	-0.00846496	-0.0056378	-0.00771518	-0.00240405	0.0100031	0.655126
Csrnp2	0.00843214	-0.00538181	-0.0114996	-0.00694624	-0.00587645	0.00424275	0.00968767	0.65502
Shroom4	-0.000692887	-0.0012932	-0.01018	0.00571168	0.000197254	0.00232114	0.0336671	0.654644
Gmfb	-0.000402983	0.000868222	-0.066055	0.0381541	0.0194283	-0.00272844	0.0554983	0.654189
Arfgap3	0.00353296	0.000846346	-0.0450748	0.0115813	-0.0238126	4.78109e-05	0.0847641	0.653803
Pcnx4	0.00524883	-0.0229754	-0.0177606	-0.00564821	0.0700256	-0.0058323	0.0505845	0.6537
Adgrg6	-0.000652285	-0.0230365	-0.00891724	-0.00872466	0.0252321	0.00202495	0.0577139	0.653631
Areg	-0.0392094	-0.16555	-0.487546	0.0414898	0.567731	0.0827391	0.229878	0.653352
Pfkm	-0.0159989	-0.00238374	-0.0104915	-0.00646653	0.00201289	0.00303539	0.0414862	0.653346
Mtmr12	0.025234	-0.00437288	-0.0210139	-0.01097	-0.0213068	-0.00641975	0.0481624	0.653286
Slc35c2	-0.015084	-0.00184091	-0.0152299	-0.0227913	0.0561975	-0.0186102	0.0226	0.653223
Crnkl1	0.0321444	0.020963	0.00535632	-0.00318493	0.0113718	-0.0325226	0.0706183	0.653213
Zfp938	-0.0350948	0.0411802	-0.0288782	-0.0592474	0.00184052	-0.0307195	0.00728015	0.653176
E2f3	-0.00578794	0.00463779	-0.0110168	0.0238341	0.0624596	-0.0143468	0.0815638	0.652585
Usp53	-0.00355169	-0.0109663	-0.0440749	0.00104815	0.00573916	0.0254142	0.026152	0.652543
Lrig3	-0.0211763	0.0102753	-0.0208402	0.000727692	0.0208051	0.0111953	0.0216837	0.652272
Ccdc25	0.0309233	-0.0289986	-0.0308884	-0.040082	0.0380114	0.0461327	0.0409304	0.652216
Pgk1	-0.0921269	-0.0711733	-0.197044	0.0341428	0.51307	-0.32483	0.47973	0.651792
Psma6	-0.108789	-0.01285	0.0017321	-0.108203	0.239115	-0.043017	0.299246	0.651773
Egln1	0.168025	-0.122228	-0.0522934	-0.0799316	0.166693	-0.0987423	0.214931	0.651706
Selenot	0.0286553	-0.018074	0.00945994	-0.0598752	0.0197791	-0.016319	0.083021	0.651373
Nkrf	-0.00140368	-0.0096467	-0.00579923	-0.00854546	0.0240136	-0.00372035	0.0163933	0.651155
Ston1	-0.00310357	0.00201127	0.000748566	-0.0172276	-0.00192351	0.000709174	0.0244629	0.650693
Rerg	-0.0029737	8.6326e-05	-0.00572596	-0.00748412	-0.00376696	-0.0087401	0.0636823	0.650457
Synj2bp	0.0198448	-0.00866303	0.0111356	-0.0545421	0.0808834	-0.032376	0.0694917	0.650297
Dnajc1	0.0760451	-0.00102717	-0.0687356	0.0240211	0.0142805	-0.0249096	0.0505828	0.64953
Itsn2	0.0982033	-0.0227837	-0.0205484	-0.00280382	0.0538361	-0.0381529	0.096075	0.64949
Ccdc28b	-0.00351405	-0.00511231	-0.0141159	-0.000561312	0.0244343	-0.0058843	0.00956753	0.649452
Rbp2	-0.0760407	-0.00991923	-0.162265	-0.145311	0.40455	-0.0202519	0.0830593	0.649283
Wdr91	-0.0144698	0.00481855	-0.00444132	-0.00428137	0.0134733	0.00132525	0.0213655	0.649267
Prkacb	-0.00478094	-0.00841961	-0.0812158	-0.0135001	-0.0161306	0.032587	0.0191315	0.649248
Fbxl3	0.00890611	0.0060225	-0.0190476	-0.0844623	-0.0151514	-0.0289307	0.00936884	0.649177
Egfl7	-0.0284582	0.0133806	-0.0113342	0.00203398	0.0235827	-0.0119202	0.0620867	0.649167
Fastkd3	-0.00441402	-0.00200118	0.000811281	-0.0115519	0.0167278	-0.0106103	0.0196008	0.648601
Gpm6b	-0.0295436	-0.0713193	-0.0271271	-0.047049	0.0683466	-2.12957e-06	0.190882	0.648052
Zdhhc2	0.0883359	-0.0664617	-0.00330837	-0.0911159	0.114563	-0.0655603	0.144177	0.647866
Adk	-0.0253626	0.0492764	-0.102647	0.0437103	0.0964238	0.00713965	0.0442169	0.647816
Tnrc6b	-0.0053021	0.0291858	-0.0774527	-0.0131774	-0.0532327	0.0184308	0.056551	0.647298
Ndc1	0.0398049	-0.0151256	-0.0179294	-0.0278787	0.0230958	-0.0214087	0.0163364	0.647124
Cpeb4	-0.0212807	0.00538508	-0.0282607	-0.0176144	0.0492915	-0.00926187	0.0072485	0.647045
Me1	-0.0352029	-0.0261835	-0.000151291	-0.0327788	0.0868227	-0.0160026	0.175467	0.647026
Suz12	0.0584495	0.00177848	-6.03157e-05	0.0196105	0.0715591	-0.0370926	0.0913439	0.646956
Slc9a6	0.0107333	-0.00475154	-0.00770285	-0.0192217	-0.0100786	0.000925741	0.0173206	0.646948
Rbm39	-0.0595728	0.0418676	-0.0738136	-0.0456128	-0.0704089	-0.0389321	0.0824697	0.646791
Bsg	-0.0379816	-0.0588744	-0.144564	0.030571	0.0346377	0.0472621	0.137211	0.646594
Meis2	-0.0374463	-0.0645179	-0.033345	-0.0671878	0.12469	-0.0148945	0.110288	0.646513
Sf3b6	-0.162867	0.0377963	-0.0451441	-0.0486399	0.168936	-0.00670157	0.259099	0.646458
Sharpin	-0.0243481	0.00933874	-0.00970789	-0.019523	0.00311095	-0.00993974	0.0161284	0.64632
Erg28	0.0375268	0.00127086	-0.00350344	-0.074819	0.107038	-0.0151945	0.0383858	0.646063
Sptlc2	-0.0226294	0.00646807	-0.0067952	-0.0394517	0.0581041	-0.0703134	0.0695259	0.645886
Mif	0.0410521	-0.0269269	-0.110729	0.0152579	0.0668483	0.00364573	0.0187391	0.645883
Nptn	-0.0123796	0.0245604	-0.042937	0.0236056	-0.0140799	0.0145351	0.128722	0.645874
Cnot10	-0.0380863	0.00100052	-0.0168834	-0.0320416	0.0202757	-0.00174438	0.0229047	0.645658
C030006K11Rik	-0.000426082	0.00300446	-0.00341404	-0.0109004	0.00657906	-0.00542618	-0.000749296	0.64558
Tie1	-0.015775	-0.0167608	-0.0247855	-0.0355485	0.0208171	-0.0154349	-0.00795779	0.645489
Narfl	-0.0258798	0.0174909	-0.00599244	-0.0219572	0.0218194	-0.0172577	0.025847	0.644793
Ndufb9	0.011036	0.00134873	0.00916425	-0.214679	0.100202	-0.0698515	0.0940236	0.64445
Alkbh2	0.00267902	0.0440455	-0.00207636	-0.0618884	-0.030524	-0.00930791	0.0913938	0.644328
Bcl6	-0.00722151	0.0076484	-0.0328202	-0.0268935	-0.0394263	0.00686131	0.0522793	0.644056
Tmem97	0.00877492	-2.09456e-05	-0.0473664	-0.0995331	0.162884	-0.0115392	0.0198739	0.644045
Pkm	-0.0164517	-0.109981	-0.0627113	-0.00252984	0.296714	-0.165177	0.423735	0.643384
Nipbl	-0.0402688	-0.00377592	-0.117724	-0.00618112	-0.0466992	0.046806	0.105076	0.642933
Arhgap29	0.0172268	-0.03715	-0.0622366	0.0730608	0.109392	-0.0174513	0.202785	0.642587
Cog3	-0.0103768	0.0160255	-0.0212956	-0.0223008	-0.0252304	0.0049532	0.0301779	0.642313
Zfp451	-0.0238106	0.0199414	-0.0196207	-0.0045125	-0.000272545	-0.0299058	0.0355087	0.640367
Pkia	-0.00669644	-0.00674135	-0.000610408	-0.00532979	0.0465558	-0.00772622	0.0488682	0.640347
Csgalnact2	-0.0209389	0.0194182	-0.0205586	0.00124253	-0.00858983	-0.00878893	0.0489357	0.639953
4930430F08Rik	-0.00607027	-0.00546104	-0.00692014	-0.00630738	0.0570641	-0.0152028	0.0403545	0.639756
Cldn12	-0.00298034	-0.00252707	0.000734103	-0.0137878	-0.00014116	-0.00429684	0.0262923	0.639434
Pmf1	-0.0230834	0.0217326	0.0142225	-0.0418757	0.0435282	-0.0269669	0.0774268	0.639086
Nudt5	-0.026771	0.00592337	-0.0257894	-0.0430343	0.194799	-0.102684	0.124176	0.638971
Ttc39b	0.0282604	-0.0223076	-0.0443269	0.0165521	0.102976	-0.0571862	0.0723864	0.638711
Nbn	-0.0355677	0.00772292	-0.0141442	-0.00424844	0.0334499	-0.0165692	0.0544571	0.638221
Actr10	-0.0807183	-0.00253141	-0.0409903	-0.111979	0.375559	-0.10348	0.217197	0.638199
Hs2st1	0.0257331	0.0535236	-0.0631193	0.0170812	-0.0363538	-0.0133967	0.0646724	0.63789
Ccl4	0.0251734	-0.0524969	-0.0293336	-0.0881867	0.120699	-0.0220586	0.0498576	0.637889
Mitf	0.00458897	-0.00623823	-0.00977351	0.00882525	0.00729951	-0.000955022	0.0278827	0.637636
Slpi	0.250646	-0.248762	-0.50556	0.279293	0.0727302	-0.387158	1.09372	0.637481
Plpp1	-0.0203432	0.00747679	0.00205108	-0.0205562	0.0216752	-0.00762182	0.0373257	0.636599
Sel1l	-0.00820772	-0.00388393	-0.000463593	-0.0277319	-0.00309884	-0.00772733	0.0947405	0.636578
Tsr1	0.00669111	-0.00229886	0.00242335	-0.0309741	0.0203054	-0.0313997	0.0297856	0.636266
Lamtor4	-0.0172269	-0.0221609	-0.0545687	-0.00736645	0.0811625	0.0215436	0.0332565	0.635864
Flot1	-0.0498438	-0.0368243	-0.0333383	-0.0292639	0.105579	-0.00897275	0.0962952	0.635815
Fam129b	0.00805145	-0.0423043	-0.0246241	-0.0525168	0.119434	-0.0497812	0.0650142	0.635723
Alkbh3	-0.0126212	0.0157637	-0.0217661	-0.0173422	0.050476	-0.0420541	0.0145786	0.635407
Plekho1	-0.0410783	-0.030812	-0.0409318	0.0043072	0.0273573	-0.0193368	0.152271	0.635353
Morf4l1	-0.00493347	0.0112169	-0.0736055	-0.00360603	-0.0687713	-0.0344409	0.32762	0.634926
Ahcy	-0.00262358	-0.00435114	0.00280481	-0.0285674	0.00225284	-0.0142305	0.147488	0.63478
Rpusd3	0.000511444	-0.00137075	0.00219569	-0.00462164	0.0115944	-0.00442452	0.0136973	0.634732
Agtpbp1	-0.0168756	0.0081333	-0.00405725	-0.0388052	0.0150976	-0.00756455	0.0119513	0.634598
Pygb	0.0298382	-0.00843564	0.00796564	-0.0415499	0.0216664	-0.0184182	0.0454431	0.634546
Slc19a1	2.41565e-05	-0.00626618	-0.0100215	-0.0238266	-0.0145243	0.00294256	0.0203759	0.634382
Ltbp2	-0.0682435	-0.0866953	-0.146375	0.0771662	0.499125	-0.133468	0.441043	0.63429
Snrpb	-0.080651	0.0318049	-0.0174926	-0.0941849	0.0753886	-0.00457495	0.0663036	0.634258
Gclc	-0.0191089	-0.0127488	-0.0190124	0.00784202	0.0496772	-0.00286984	0.0596851	0.633211
Stt3b	-0.00436275	-0.0184775	0.00297349	-0.0947505	0.003999	0.00914774	0.0954273	0.632758
Fdxacb1	7.37588e-06	-0.00110344	-0.000556357	-0.00273785	0.00343195	-0.00680683	0.0563173	0.632714
Il4ra	-0.0151872	0.00375509	-0.00237542	-0.048706	0.0405148	-0.0329213	0.0251939	0.632669
Ociad2	0.007668	-0.0188458	-0.0506826	0.0463708	0.0687484	0.0280337	0.0929646	0.632467
E2f8	0.0299014	0.0197949	-0.0298206	-0.00189841	0.00384684	0.0670587	0.0552625	0.632329
Irf5	0.00857324	0.00200083	-0.000396715	-0.0124382	-0.00193689	-0.00645812	0.00952977	0.632264
Scrn1	-0.00444314	0.00855113	-0.00100101	-0.0150736	0.0401194	-0.0201932	0.0219668	0.632249
Fam107b	-0.0486187	-0.00217145	-0.143845	0.0814893	0.00917349	0.0406495	0.260725	0.63219
Igfbp4	-0.228334	-0.0167165	-0.138712	0.0698269	0.258749	0.0457665	0.600111	0.631059
Focad	0.00411398	0.00893419	-0.00851855	-0.01349	-0.011532	-0.00279722	0.00710671	0.631019
Nedd4	-0.118088	0.0296875	-0.111267	0.0221323	-0.0216904	-0.0288931	0.41492	0.631002
Rab2b	-0.00789684	-0.00197104	-0.025598	0.00199031	-0.0030547	0.00697836	0.0107538	0.630881
Zhx1	0.00825063	0.0136129	-0.0185603	-0.0561454	-0.0105457	-0.00474991	-0.000187514	0.6308
Nipal1	-0.0204216	-0.0170876	-0.0223415	-0.0130553	0.0894594	-0.0158927	0.0550273	0.63079
Mttp	0.00363989	-0.000988207	-0.00457812	-0.0233218	-0.0107299	-0.00590409	0.0130704	0.630549
Dlg4	-0.0798987	0.00148937	-0.0750371	0.0537023	0.127278	0.010597	0.189493	0.630409
Sdc4	-0.0128541	0.0531918	-0.0964625	0.088303	-0.0156123	-0.0142649	0.312758	0.63039
Thoc7	0.0509375	0.0313555	-0.150945	0.112703	0.0349791	0.0252228	0.135924	0.630357
Trak1	-0.00797004	0.0181207	-0.00254355	-0.0203402	0.0362739	-0.0148236	0.0138207	0.630044
Zmpste24	0.067556	0.00538611	-0.0333815	-0.0126481	0.029593	-0.0409881	0.0211777	0.629962
Dusp3	-0.00528331	0.00569703	-0.0361702	0.0309326	0.00566294	-0.02033	0.0849242	0.629935
Klhl18	-0.00406165	-0.000847429	-0.00194334	-0.0258223	-0.00635345	-0.00381022	0.0169155	0.629638
Glo1	0.0915411	-0.018719	-0.0197054	-0.00893393	0.0862147	-0.0844293	0.101463	0.629318
Runx2	-0.0271299	-0.0272444	-0.0328624	-0.00491085	0.105775	-0.00704435	0.0777748	0.62919
Gm16754	0.00891786	-0.00498977	-0.00510549	-0.0110522	0.00130281	-0.0198593	0.0139824	0.629142
Cish	-0.0568075	-0.0519809	-0.0230227	0.00606279	0.127032	0.0182307	0.411874	0.628739
Ppard	-0.0468013	-0.00956009	-0.0347017	0.000341222	0.0536276	0.00395658	0.0648859	0.628712
Gstt3	0.0071239	0.0386261	-0.0121158	-0.0863702	0.0123544	-0.0236012	0.00775392	0.628559
Sapcd2	0.0141625	-0.0139097	-0.00751151	-0.0228141	0.00327105	-0.0161704	0.0122049	0.628451
Mrm2	-0.00419884	0.00311806	0.00489519	-0.021318	0.00783672	-0.00798747	0.0225725	0.628282
Atf7ip	-0.0186998	-0.0075179	0.00650111	-0.0569399	0.00479834	-0.0165202	0.106963	0.628195
Setd5	-0.0364774	0.0450376	-0.0311114	-0.0310433	-0.00553965	-0.0611739	0.0353475	0.627957
Abhd18	-0.024403	-0.0159736	-0.0288463	0.0056309	0.0427448	-0.0179594	0.0459995	0.627818
Cdc25b	0.00762368	-0.00554335	-0.0014101	-0.00910654	-0.000714418	-0.017062	0.0659935	0.627312
Msrb1	-0.0703293	0.0262172	-0.0257312	-0.0209567	0.00991805	-0.0116194	0.114057	0.627148
Tcf19	0.0372773	0.00154723	0.00322063	-0.0423528	0.0786351	-0.0291302	0.036721	0.627137
Tiparp	-0.149217	-0.0142664	-0.201379	0.117274	0.274309	0.0396656	0.313994	0.6268
Smc2	0.0491069	0.0664001	-0.0449666	-0.0740692	0.026709	-0.0407152	-0.0127649	0.626382
Cerk	-0.00326256	0.00108542	0.000159747	-0.00383607	0.000625287	0.00190117	0.0202509	0.626323
Gdpd1	-0.0198534	-0.00508572	0.00345464	-0.0226705	0.0183514	-0.00789341	0.0850959	0.626211
Rdh14	0.0013676	0.0271372	-0.00816638	-0.0458906	-0.00618079	-0.056825	0.0343755	0.626006
Map2	-0.0194347	0.0167534	-0.00240364	-0.00949888	0.0104112	-0.0184816	0.0383045	0.625721
Nek9	-0.0149556	-0.00598312	-0.0141013	-0.0198936	0.0568555	-0.0257271	0.0255289	0.62556
Pop1	0.0118744	0.024503	-0.0603704	-0.0310129	-0.0113422	-0.0222903	-0.0229285	0.625422
Slc22a4	-0.0145551	-0.00606383	-0.00835058	-0.0170128	0.0180812	0.00850132	0.0157631	0.624994
M6pr	-0.0316736	0.0186708	-0.0501514	0.0126673	0.0154769	-0.0724034	0.0616325	0.624981
Chrna1os	0.00719965	-0.00281662	-0.00768808	-0.0101602	0.0252185	-0.00902354	0.0041989	0.624598
Eif2s2	-2.00906e-05	0.0433243	0.0184217	-0.0619282	0.0013185	-0.0480174	0.109253	0.62457
Flna	-0.0223281	0.0225498	0.000327888	-0.00908174	0.0301883	-0.0410262	0.0743798	0.624077
Runx2os1	-0.000174826	0.0150933	-0.0116412	-0.0170693	0.0124651	-0.00137429	-0.00485486	0.623833
Pip4k2a	-0.0222858	-0.00800959	-0.0203454	-0.0208367	0.0354521	0.00331261	0.0113664	0.623456
Asxl2	-0.047432	-0.0168547	-0.00450192	-0.0224653	0.0601162	-0.0446995	0.192015	0.62336
Rab20	0.00253521	0.0278567	-0.0401851	-0.0407778	0.0315971	-0.0218147	-0.0217577	0.623349
Fbxo22	0.0211897	-0.00510065	-0.00564088	0.00220255	0.0152617	-0.016062	0.0247311	0.622972
Gdap2	-0.00492453	0.0116098	-0.00797256	-0.0261158	0.0211622	-0.0179639	0.000205435	0.622968
Set	0.000265966	0.057523	0.0558573	-0.0927817	0.205002	-0.078107	0.179483	0.622763
Heg1	-0.00291309	-0.00686019	-0.00778328	0.0035074	0.00482575	-0.00231513	0.0736644	0.622647
Ola1	0.0141571	0.0098051	0.0292952	-0.0480086	0.0956677	-0.0789906	0.141016	0.622613
Sod2	-0.121142	0.027768	-0.0703854	0.0519732	0.0839693	-0.108694	0.573295	0.62246
Rbm12	-0.00501644	0.00910526	0.0029083	0.00172721	0.00717051	0.00131826	0.0310978	0.622379
Hmgn3	-0.091814	0.0335153	-0.0222199	-0.14316	0.152792	-0.043948	0.0717784	0.622282
Hddc3	-0.0186719	0.00203347	-0.0168576	0.00923738	0.00956637	-0.00662488	0.0425444	0.622276
Acp5	-0.0473138	0.0167989	-0.00129255	-0.0968782	0.10403	-0.0602361	0.067398	0.622225
Acin1	-0.0215019	0.0125538	-0.124064	0.0435145	0.0153058	0.0787641	0.103522	0.622084
Gphn	0.00296619	-0.00637891	-0.0132836	0.000401427	0.0748958	-0.0430037	0.0557256	0.622039
Hoxaas3	0.00886003	0.00648617	-0.00281498	-0.0124856	0.00810079	-0.00925512	0.00140591	0.622026
Ppfibp1	0.0184344	0.00757681	-0.00248931	-0.0420081	0.00440065	0.009929	0.0151722	0.621952
Plcd1	0.00341763	-0.00332017	-0.00515713	-0.00467858	0.0105556	-0.0003557	0.00115632	0.621699
Nes	0.103417	0.0657241	-0.00395379	-0.00574139	0.00141773	-0.0363615	0.089252	0.621382
Madd	0.00195903	-0.00897878	-0.00229879	-0.0196359	0.00192958	-0.0104102	0.00940434	0.62136
Cep85	0.00414443	-0.00758506	-0.00455889	-0.0145106	0.0361485	-0.00936787	0.0152639	0.620959
Ino80	-0.0300281	-0.0329792	-0.0246164	-0.0376724	0.0422139	0.00535505	0.0344916	0.620822
Gba	-0.0295877	-0.0151881	-0.0234123	-0.0201566	-0.0162055	-0.00930979	0.0411661	0.620795
Coa4	-0.0143422	0.0152592	-0.0116942	-0.0200584	-0.00538583	-0.026278	0.00941923	0.620394
Rsrc1	0.0580846	-0.0197708	-0.0853795	0.0226437	-0.0512194	0.0318342	0.194918	0.620199
Sapcd1	-0.00658581	-0.00607968	0.00346129	-0.0128667	0.0119493	0.00161692	0.0495297	0.620128
Mccc1	-0.0101221	0.0208089	-0.0227867	-0.0240485	0.00214062	-0.0300989	-0.00634703	0.620126
Tspyl2	-0.0147268	0.00660289	-0.00670365	-0.00168916	-0.000445156	-0.00632388	0.039265	0.619857
Naa16	-0.0080925	0.00309085	-0.0037044	-0.0192798	0.0218574	-0.0146061	0.00755384	0.619825
Tmed3	-0.0255686	-0.0226353	-0.0565746	-0.00898089	0.139658	-0.008708	0.0546419	0.619264
Spsb1	-0.012594	-0.0439622	-0.0145095	-0.0148952	0.162702	0.00427009	0.140444	0.619203
Itpk1	-0.0333274	-0.0289942	-0.0301274	0.00842274	0.112276	-0.0436959	0.125186	0.619033
B230118H07Rik	0.0245905	-0.0142884	-0.00918669	0.0111215	0.0414081	-0.0153137	0.0461049	0.618988
Bcar3	-0.0047292	-0.0135808	-0.050838	0.0426261	0.104258	0.00981608	0.0812506	0.618896
Atrip	-0.0175105	0.00429465	-0.00472473	-0.00232076	0.010939	-0.00183268	0.0311658	0.61883
Uqcrb	0.230044	-0.0138771	-0.0563272	0.0515955	0.195059	-0.0734785	0.166311	0.618811
Ndrg1	-0.139692	-0.199596	-0.0979439	-0.137491	0.0823434	-0.232887	0.591838	0.618588
Rbm26	-0.057226	0.0160007	-0.109758	0.0559459	0.0549742	-0.0227627	0.0847808	0.618502
Zfp36l2	-0.0233822	-0.123199	-0.0669394	-0.113938	0.0725898	-0.045956	0.0504621	0.618281
Plekhh1	0.0185893	-0.00740793	-0.00980766	-0.00747563	0.00718482	-0.00396714	0.00645322	0.618021
Pls3	0.0128122	-0.0720706	-0.0327332	0.0509984	0.160632	-0.0407027	0.305066	0.617951
Bmpr1a	0.00176742	0.0297947	-0.0346295	0.00586451	0.129644	0.0125806	0.0334545	0.617838
Pdha1	-0.0651427	0.0102942	-0.0180445	-0.0708375	0.0218426	-0.000541105	0.0459794	0.617837
Ubxn2a	0.0277888	-0.00211332	0.013817	-0.00993467	0.0230918	-0.0320512	0.107441	0.617703
Selenoh	-0.00991612	0.0796361	-0.00316041	-0.085916	0.111996	-0.0821843	0.0470972	0.617685
Pcolce2	0.0297549	-0.138408	-0.00251842	-0.146249	0.276775	-0.0485459	0.261451	0.617382
Scn5a	0.0349598	0.0242282	-0.0391643	0.0286799	-0.0126843	-0.00848586	0.0557865	0.617361
Rpsa	-0.0087527	-0.0782953	0.0358505	-0.149224	0.192295	-0.0349922	0.256994	0.617353
Rpl35	-0.068189	-0.0184614	0.00234731	-0.118806	0.214002	-0.0864174	0.167728	0.617279
Pus3	-0.0293214	0.0163304	0.00282135	-0.0635744	0.00989438	-0.00193526	0.0482998	0.616846
Abcg2	0.163078	-0.0282594	-0.0578395	-0.0480221	0.162497	-0.0675774	0.0628821	0.616401
Desi2	-0.01739	-0.0640363	-0.00632392	-0.0711872	0.0860585	0.00122166	0.119823	0.616121
Nbl1	0.00979412	-0.00747079	-0.0186295	-0.0555985	-0.0496223	0.00150597	0.143674	0.616007
Uqcrc1	0.109706	-0.0309415	0.0116884	-0.104161	0.129416	-0.0377281	0.0945963	0.615959
Map3k1	-0.0309478	-0.0205885	-0.0231357	0.00199417	0.0323677	-0.0263579	0.0803749	0.615821
Ydjc	-0.00341812	0.0123718	-0.00927328	0.011709	0.018021	-0.0114844	0.0194915	0.615556
2410089E03Rik	-0.0483591	0.000887297	-0.0506091	0.00168214	0.00358248	-0.00212617	0.0357383	0.615377
Hmgn5	-0.00719427	-0.0194738	-0.038566	-0.063382	0.231072	-0.049872	0.0823241	0.615223
Fzd6	0.00848921	0.049276	-0.0609146	-0.0148573	-0.0134911	-0.00292901	-0.00362615	0.614841
Ticrr	-0.00842805	0.0199495	-0.00332857	-0.00472598	0.0136726	-0.0138979	0.014549	0.614776
AU019823	0.0629693	0.0138014	-0.0132252	-0.00977496	-0.000666612	-0.0221403	0.0410173	0.614691
Aldoa	0.00657007	-0.000144455	-0.122983	0.0887295	0.166044	-0.14862	0.162736	0.61463
Tmem189	-0.0109692	-0.00148128	-0.00493996	0.0182782	0.0466306	-0.0212528	0.0987521	0.614483
Zfp248	0.0187768	-0.00547932	-0.00384196	0.00308069	0.0232048	-0.00896627	0.0200244	0.614231
Tmem184c	0.0466857	0.00153715	0.00985307	-0.0583633	0.014413	-0.0227242	0.0491799	0.614212
Stk24	-0.00221188	-0.00357216	-0.055343	0.0301975	-0.0121998	-0.00165566	0.0794645	0.613965
Abca7	0.000421927	-0.00421158	-0.00624298	-0.0399102	0.024437	0.0065792	0.00744308	0.61382
Atp6v0b	-0.0429638	-0.00777072	-0.0321263	-0.0433615	0.146586	-0.0534495	0.0651109	0.613792
Wdr43	-0.0649391	0.0198016	-0.0281867	0.0386273	0.250468	-0.0662204	0.234678	0.613583
Snx7	-0.0181794	0.00585781	-0.0221513	-0.0355035	0.0925876	-0.0282923	0.0216558	0.613498
Mtdh	0.0259137	0.0769978	-0.236765	0.0720774	-0.0398593	0.0679589	0.106905	0.613231
Ubac2	-0.016816	-0.0131165	-0.000950272	-0.0370415	0.0761362	-0.0123286	0.0520232	0.613221
Tipin	-0.0745864	0.0095025	-0.00557774	0.0169902	0.19987	-0.07652	0.280268	0.613215
Chkb	-0.0210065	0.000604071	-0.0207544	-0.0304755	-0.00687064	-0.0092532	-0.0116393	0.613214
Faap24	-0.00598632	0.00807874	-0.00183687	-0.00959456	0.0172231	-0.00939135	0.00702781	0.61317
Dbt	-0.0120399	0.00203881	-0.000989937	-0.00174929	0.0101784	-0.0151633	0.143612	0.613162
Mcub	-0.0742248	-0.0204857	-0.127369	0.0598643	0.190941	0.0300721	0.145541	0.61312
Mmachc	0.00585054	-0.00377793	-0.000945038	-0.010177	0.00893517	-0.00213972	0.00446728	0.613051
Zmat5	0.0065186	0.00773495	0.00211512	-0.0188862	0.0832413	-0.0184354	0.0381716	0.61299
Cog5	0.00981398	-0.0104731	0.00389587	-0.0236859	0.0298084	-0.0145404	0.027324	0.612768
Nuf2	0.0277128	0.00747991	-0.0262833	0.0176117	0.00668988	-0.0392016	0.0441937	0.61267
Pik3r4	-0.000173162	-0.00345608	0.00727191	-0.0148902	0.0177619	-0.0110487	0.0348307	0.61255
Fyco1	0.00155557	-0.00862355	-0.00101406	-0.0179529	-0.00536382	-0.00919917	0.0390078	0.612546
Uckl1	-0.0261222	0.000952702	0.0121281	-0.0216871	0.0357675	-0.0277747	0.163135	0.612374
St3gal1	-0.0198845	0.00245893	-0.00353063	-0.0779039	-0.0330556	-0.00418202	0.125672	0.612323
Zfp810	0.00906675	-0.0086631	-0.00640803	0.00247102	0.0192972	0.0112474	0.0184476	0.612274
Cyb5r3	0.126562	-0.00644955	-0.146702	-0.0362601	0.278754	-0.0104047	0.0124919	0.612232
Mfap3	-0.0113244	0.0100374	0.000845593	-0.0665427	0.000783613	-0.0311029	0.0288345	0.612182
Zdhhc12	0.0473953	-0.0142985	-0.00130028	-0.0230467	0.0499618	-0.0159316	0.0358297	0.61215
Ghitm	-0.00270139	0.0614714	-0.119744	-0.0383165	-0.00255264	0.0827874	0.011059	0.611512
Mmd	-0.00128498	0.0607483	-0.119465	0.0224102	-0.0428987	0.0104172	0.0502961	0.61095
Fam162a	-0.0454582	-0.064822	-0.212297	0.15177	0.324754	-0.130734	0.298509	0.610636
Hspg2	-0.0551212	0.0194425	-0.0243537	-0.0265268	-0.0203013	0.00842017	0.174608	0.610616
Tpp2	0.0137584	0.0566821	-0.0114723	-0.0589477	-0.0191862	-0.0560947	0.0415729	0.610517
Cwc15	0.0757984	0.0292026	-0.0705943	0.0152478	-0.0183897	-0.0086297	0.0394261	0.610354
Mettl7b	0.0477653	-0.0456828	-0.0499645	-0.0220042	0.127429	-0.0936467	0.0652019	0.610016
Kat6b	-0.0204397	0.00148934	-0.0510085	-0.00524553	0.00698251	0.0238077	0.00859229	0.609215
Trp53inp2	-0.0120903	0.00267971	-0.00325352	-0.00502579	0.00130044	-0.00418449	0.0198555	0.609193
Ube2e2	-0.0174084	-0.024159	-0.002735	-0.00186907	0.0699072	-0.00381114	0.108418	0.609068
Fam172a	0.00862185	0.0042311	0.00748682	-0.0493035	0.0371981	-0.022921	0.0251041	0.608853
Psma3	0.00184093	-0.0665233	0.00192271	0.0193873	0.19983	-0.0825697	0.352982	0.608332
Cltc	0.00779855	0.0275739	-0.0115037	-0.00324387	0.0394136	-0.0606563	0.038939	0.608312
Ppa2	0.0174662	-0.00477405	-0.0328854	0.0395641	0.1205	-0.00755642	0.0727691	0.608074
Rtf2	0.0382127	-0.0277185	0.00389963	-0.0262813	0.0340786	-0.0576877	0.108942	0.60743
Htatsf1	-0.0335823	-0.0215498	-0.0186293	0.01297	0.0746572	-0.0414141	0.142378	0.607392
Fkbp1b	-0.0503658	0.018578	-0.0543197	0.00865416	0.00975726	0.0430586	0.08242	0.607311
Mtss1	-0.18381	-0.0735561	-0.14411	-0.011991	0.112682	0.0283335	0.238144	0.60725
Col6a2	-0.0899337	-0.0246023	-0.0492958	-0.0333483	0.00576826	-0.0239384	0.0898513	0.607103
Ids	0.0185782	0.00955234	-0.0027078	-0.0118828	0.0143956	-0.00010766	0.00220978	0.607049
Mrpl47	-0.0242496	0.00424805	-0.00934829	-0.0183551	0.0260218	-0.0195203	0.0151362	0.606674
Nup155	-0.0340569	0.0147641	-0.0403999	0.00519863	-0.00384334	0.0018114	0.0311655	0.60656
Vps16	-0.00152539	0.00908808	0.0120428	-0.0509009	-0.0109861	-0.0328739	0.118405	0.606243
Dixdc1	0.00609442	-0.0184771	0.00903659	-0.0352392	0.0240628	-0.0211456	0.0609218	0.606064
Rprd1b	-0.0364897	0.0154496	-0.00484214	-0.0497715	0.00100833	-0.0257166	0.0352227	0.606015
Trappc12	-0.018666	0.000679029	-0.00809154	-0.0326731	0.0503209	-0.00930455	0.0167301	0.605724
Tacc3	0.00427931	0.0355339	-0.0350703	-0.0354151	0.0245672	-0.0924187	0.0130486	0.605662
Hexa	-0.0563174	-0.0114376	-0.0614054	0.0378629	0.0329789	0.00642763	0.158253	0.605518
Otud6b	-0.0220239	-0.00305248	0.00527194	-0.0303784	0.0226756	-0.0121234	0.0502287	0.605338
Slc25a12	-0.0209562	-0.0169805	-0.0169531	0.0025707	0.0329885	-0.0228209	0.0551238	0.605005
Rps18	0.0403881	-0.0341975	0.000174867	-0.108717	0.264598	-0.0588117	0.122218	0.604982
Myo10	1.75399e-05	-0.00366305	-0.122756	0.104058	0.197303	-0.0270824	0.13174	0.604783
Adam19	-0.00800619	-0.00107737	0.00493182	-0.0194604	0.0219754	-0.00693633	0.0245019	0.604771
Cebpz	-0.0879529	0.0196615	-0.0271354	-0.0149101	0.0957599	-0.0439657	0.112894	0.604727
Ccdc102a	0.00740332	-0.00801223	-0.0195572	0.01629	-0.00185515	-0.0132582	0.0750306	0.604191
Wdr75	-0.0502121	0.0394914	-0.0210319	-0.0564688	-0.0128962	-0.00742157	0.0376385	0.60409
Extl2	-0.0414401	-0.00588043	-0.0160351	-0.00532155	0.0403554	-0.0190924	0.0634482	0.603795
Shb	0.0188439	0.0218916	-0.0538203	0.0241316	-0.0321525	-0.0112339	0.0666493	0.603757
Rgmb	-0.0893184	-0.00609128	-0.0108942	-0.0170132	0.0950946	-0.0159727	0.205361	0.603752
Brix1	-0.0842269	0.0674729	-0.0945687	0.0262543	0.0198992	0.00051437	0.0801383	0.603665
Gde1	-0.024053	0.0256144	0.00705322	0.0125547	0.0576461	-0.0252875	0.103045	0.603649
Socs4	0.00565767	0.00403323	-0.0191154	0.0249137	0.0033595	-0.0126074	0.0657856	0.60354
Clasp2	-0.0287624	-0.00610003	-0.0042994	-0.0215147	0.0107243	-0.0143283	0.0476812	0.603289
Palld	-0.113271	-9.68782e-06	-0.0713873	0.0085619	0.139792	-0.128571	0.179488	0.603282
Lasp1	0.013389	-0.030802	-0.0933332	0.00419197	0.104461	-0.02939	0.0100409	0.603209
Trip4	-0.015446	-0.0172555	-0.00570225	0.00285639	0.0258799	-0.01741	0.158282	0.603118
Tmem167b	0.0395866	-0.0124657	-0.00927277	-0.0291916	0.00403033	-0.012761	0.0225456	0.603114
Pfkl	-0.0492806	-0.0551712	-0.0319366	-0.00943822	0.094658	-0.095648	0.198109	0.602786
Colgalt1	-0.00309188	-0.0375986	-0.0244881	-0.0251046	0.316946	-0.0861427	0.194462	0.602768
Tpi1	-0.0213882	-0.0910274	-0.0530546	-0.0551952	0.416088	-0.195927	0.297043	0.602762
Prpf6	-0.0663717	0.0645925	-0.0474735	-0.0283557	0.00898532	-0.0317204	0.0315408	0.602662
Ilf2	0.0769532	-0.0599305	-0.0706958	-0.00330046	0.0838968	0.0288282	0.0529396	0.602414
Oxct1	0.00518209	-0.00595301	0.0151098	-0.0551765	0.0812902	-0.0763823	0.092365	0.602399
Marcks	-0.0718666	-0.0332167	-0.0097105	-0.116592	0.123216	-0.0489542	0.0934835	0.60236
Mfsd1	0.0538852	-0.0212697	-0.0123587	-0.0766305	0.204249	-0.0271036	0.0673621	0.601577
Leo1	-0.0201163	-0.0012863	-0.0423595	0.0504818	0.0184519	-0.0527027	0.28345	0.601566
Ap3m1	-0.00733892	-0.00572855	-0.020853	0.0163621	0.0384543	-0.0128055	0.0338576	0.601547
Slc1a4	-0.0265451	-0.00491784	-0.00945134	0.00267141	0.0337714	-0.0055357	0.0591499	0.601416
Slc16a1	-0.00344554	-0.044522	-0.0260345	-0.0527425	0.0574266	-4.23647e-05	0.0221059	0.600612
2007-09-01	-0.080969	-0.0177553	-0.0133308	0.00434448	0.192175	-0.0674923	0.252193	0.600382
Il1rn	-0.0354545	-0.0242419	0.0184304	-0.0672733	0.0846373	-0.0420918	0.137648	0.599961
Dnm2	0.0479925	-0.00154148	-0.0239845	0.00438442	-0.00490067	0.0293757	0.0477419	0.59959
Aars	-0.0518974	-0.00693889	-0.0165172	-0.0728233	0.0524521	-0.0636854	0.0312869	0.599545
Lats2	-0.0252448	0.018188	-0.0381488	0.0170756	-0.00531925	-0.0136407	0.0449114	0.599463
Fuca1	0.0177558	0.0160059	-0.0423295	0.0156596	0.0332412	0.00155529	0.00214601	0.599407
Psmc1	-0.036548	-0.0292065	-0.106094	0.0440687	0.321708	-0.0829931	0.169419	0.598859
St3gal6	-0.00697402	0.0191803	-0.0650628	0.0821121	0.104993	-0.055243	0.123497	0.598796
Eif2s1	0.00208858	-0.0424885	0.0124529	-0.114515	0.438509	-0.0858373	0.254196	0.598303
Stag2	-0.0465138	0.0224584	-0.0396863	-0.00186054	-0.016112	0.00095342	0.062654	0.598054
Dlg5	0.0521181	-0.000417257	-0.0687605	-0.0186284	-0.045934	-0.0321977	0.024047	0.597689
Psmd4	0.0464165	-0.0440314	-0.0575838	0.0327233	0.0960137	0.0214601	0.0715003	0.597602
Sema5a	0.0280533	0.00128535	-0.0261823	-0.000753982	0.0214105	0.0024608	-0.000208296	0.597498
Asns	0.015025	0.0561507	-0.0380151	-0.111249	0.0072241	-0.0361662	-0.0186194	0.597172
Usp24	-0.0179829	-0.0289895	-0.00683837	-0.0111303	0.167485	-0.0166928	0.127669	0.596943
Ncl	0.109044	0.0309187	0.00960577	-0.0149582	0.0711123	-0.0287681	0.0557942	0.596923
Cisd3	-0.0102475	0.0621003	-0.0296234	-0.033752	0.0409728	-0.0240277	-0.00390654	0.596584
Gm28875	-0.00815827	-0.000473496	-0.0153025	0.03365	0.0368241	-0.0125468	0.0942597	0.596494
Rpl32	0.021668	-0.0189782	-0.0725361	0.0060041	0.310154	-0.117341	0.132498	0.596072
Slc25a44	-0.00278086	-0.00562269	0.00275421	-0.00444887	0.0127912	-0.00650974	0.0317719	0.595831
Pitrm1	0.0121249	-0.00290651	0.000219872	-0.0107025	0.0621546	-0.0292183	0.036333	0.59566
Clu	0.187512	-0.21096	-0.392268	-0.296506	-0.141058	0.0754139	-0.000368549	0.595401
Lin52	-0.00713847	-0.000137964	-0.00218239	-0.00944068	0.0015243	-0.00407432	0.00223204	0.5954
Dyrk2	0.0139422	0.011147	-0.0102812	0.0168843	-0.00148541	-0.00941065	0.0383862	0.595395
Rlf	0.00459514	-0.0188426	-0.00420652	-0.00560501	0.0228098	-0.0498457	0.0978827	0.595184
Zyx	-0.167462	0.0124468	-0.182784	0.104091	0.349951	-0.0833046	0.26457	0.595002
Slc48a1	-0.0714007	0.000540471	-0.113867	0.0644062	0.0134617	-0.0265449	0.157797	0.59483
Gon4l	0.00908129	-0.0184266	-0.0206037	0.00653511	0.0423985	0.0225821	0.0325477	0.594751
Pdp2	0.0224216	-0.0204338	0.00632486	-0.0182562	0.0353379	-0.0117869	0.048594	0.594744
Tmem30a	-0.0268035	-0.0457746	0.00246475	-0.0235425	0.201601	-0.00927997	0.184316	0.594544
Pak3	0.00769724	0.0103314	0.00203138	-0.015551	0.000552765	-0.0116738	0.0109468	0.594413
Gm47689	-0.014782	-0.00183331	-0.00366089	-0.00739003	0.0129486	-0.000610981	0.017202	0.594322
Pbxip1	-0.074485	-0.0209076	-0.0571043	-0.00763464	0.0584324	-0.025268	0.0532733	0.593936
Trpc1	-0.00710604	-0.00853964	0.000150328	-0.00524093	0.0232215	-0.0129227	0.035295	0.593489
Coil	0.00129941	-0.00400191	-0.0048068	0.00289393	0.0147469	-0.0101286	0.0134262	0.59346
Lpin1	-0.000309546	-0.0151611	-0.0107013	-0.000355143	0.0414652	-0.0117111	0.0278453	0.5932
Rb1	-0.0217008	0.0138184	-0.0059287	-0.00788101	0.0188507	0.0061965	0.020616	0.593053
1700017B05Rik	-0.0393283	-0.0228743	-0.0212305	-0.0180835	0.00419538	-0.00975869	0.0563222	0.592959
BC030867	0.00693995	0.00521815	-0.0111601	0.00537898	0.0352665	-0.00166682	0.00796217	0.592951
Rabgap1l	-0.0188638	-0.00321608	-0.0224048	-0.00784796	-0.020276	-0.00686369	0.0271563	0.592929
Rad51ap1	-0.0108065	0.0143362	-0.0114467	-0.0211939	0.0643326	-0.0114094	0.0122017	0.59249
Tmem159	-0.0325575	-0.000856342	-0.0233679	-0.00890159	0.0223427	0.0128443	0.0227677	0.59245
Gbe1	-0.0166409	-0.027145	-0.0315428	0.00830524	0.00832193	-0.00425926	0.0580614	0.592071
S100a8	0.0504493	-0.0975111	-0.0915637	-0.196029	0.060916	0.226172	0.195126	0.591799
Haus2	-0.00806326	-0.0106053	0.00303268	-0.0158164	0.0396428	-0.0186368	0.0418371	0.591593
Ass1	0.205266	-0.124575	-0.0441148	-0.109611	0.191351	-0.0154284	0.142808	0.591488
C1galt1	0.0639247	0.0200398	-0.0587202	-0.00524314	-0.0240066	-0.0100099	0.0207666	0.591465
Cxcl5	-0.120061	0.0720981	-0.111862	-0.0210151	-0.156952	-0.119986	0.855136	0.59109
Ndufa4	0.0259101	-0.0821365	-0.200597	-0.138412	0.183594	0.103313	-0.0250265	0.590768
Cpne8	-0.0585217	0.00990966	-0.104143	0.0460154	0.0606515	0.00669772	0.0624246	0.59055
Cdkn2d	-0.0457835	-0.0215656	-0.0138655	-0.0377591	0.0559803	-0.0820226	0.0872111	0.590488
Efr3a	-0.144764	0.0403174	-0.0446675	-0.138862	0.15287	-0.0675775	0.0667783	0.590303
Capn2	0.0641757	-0.0528998	-0.0300188	-0.0565955	0.0344117	0.0549131	0.0675154	0.589968
Banp	-0.0586725	0.0234687	-0.0336907	-0.0341745	-0.00693118	-0.0147313	0.0198824	0.589643
Cmtm7	-0.034279	-0.00487587	-0.0202847	0.0574678	0.118319	-0.0197263	0.189775	0.589299
Wdr44	0.0028383	-0.0115722	-0.0132501	-0.0245568	0.0276196	-0.0144795	-0.00153601	0.589254
Zfp770	-0.000736433	0.00257233	0.00911311	-0.0125209	0.00690479	-0.00543534	0.0377725	0.589016
Rabepk	-0.0108357	0.00029045	0.0170384	-0.0447767	0.0243937	-0.0234838	0.066504	0.588749
Arsk	-0.0140763	0.00411359	-0.000711322	-0.0176816	-0.00110735	-0.00719691	0.0180342	0.588706
Gtf2f1	0.00382897	0.0160586	-0.0304711	0.0368829	0.100619	-0.075919	0.0866247	0.588627
Hectd1	0.0292419	0.00391344	-0.0076504	0.0762176	0.0754696	-0.0718036	0.290977	0.588422
Fnip1	-0.0111269	0.0265734	-0.0864036	0.0355539	-0.0327207	0.0190255	0.0810639	0.588205
2700097O09Rik	-0.0320654	-0.0097756	-0.0114198	-0.0125201	0.0900716	-0.0175439	0.0624138	0.587665
Lmf1	-0.040476	-0.0261572	-0.0142513	-0.0227707	0.0523051	-0.00654106	0.0629673	0.587413
Ibtk	-0.0268867	0.000664922	0.00272524	-0.0249716	0.00264529	-0.00887486	0.0856145	0.587366
Zer1	-0.0106772	-0.00415264	-0.00598312	-0.0280112	-0.00911121	0.00381562	0.0171063	0.587352
Slc39a7	-0.0430001	0.0178766	-0.0180674	-0.0529164	0.0762828	-0.00358112	0.0193831	0.587084
Tlk1	-0.0109797	-0.0131335	0.0023158	-0.0345355	0.0189461	-0.0393426	0.0443549	0.58691
Ppp2r5e	-0.0178386	-0.0106658	0.0380634	-0.0531755	0.138457	-0.0657474	0.177786	0.586728
Pole2	-0.00996867	-0.00653153	-0.0117126	0.00647705	0.0755393	-0.0101631	0.0473008	0.586631
Ttll1	0.0109793	-0.00173791	-0.0135682	0.0144205	0.00342243	-0.00620923	0.0251079	0.586609
Ggct	0.274181	-0.317605	-0.21296	-0.595545	0.410355	-0.128194	0.0493443	0.586571
Eif3g	-0.070186	-0.0360397	0.0048146	-0.0357768	0.0820287	-0.0468661	0.246837	0.586555
Rac3	-0.0110354	-0.019745	-0.0265394	-0.0367966	0.0566005	-0.0564033	0.00957248	0.586255
Alkbh6	-0.0108458	0.0868495	-0.0599315	-0.0499304	-0.0184293	-0.0253419	-0.00353463	0.586168
Bend4	-0.00508685	-0.00700245	-0.00470768	0.00359808	0.00589023	0.000630837	0.0415766	0.585087
Rhot1	0.00855044	0.00185175	0.0095034	-0.0265176	0.000468915	0.0142958	0.0476283	0.585073
Mpc1	-0.0713084	-0.040378	-0.0308881	0.0252356	0.110092	-0.0325577	0.236951	0.584677
1110002L01Rik	-0.00396733	-0.00799552	0.00112213	-0.0154132	0.00749066	0.0161868	0.0407265	0.584385
Tacc1	0.0535913	-0.0370582	-0.0162371	-0.0213539	-0.000614651	-0.0336844	0.0766655	0.584231
Fbxo33	-0.0264567	-0.0129706	0.00330856	-0.0190193	0.0219036	-0.0161533	0.0976863	0.583913
Ankrd44	-0.00981337	0.00106874	-0.0228255	0.0103954	0.0100338	-0.00379631	0.0105686	0.583237
Car12	0.0338289	-0.0518357	-0.0164637	-0.0454554	0.115053	-0.0192744	0.0560133	0.583226
Lars	0.00437516	0.0161514	0.0018254	-0.12431	-0.0340838	0.000355165	0.0773625	0.583224
Rpp14	0.0358561	-0.0181868	-0.0299327	-0.0231128	0.200924	0.00545721	0.0602195	0.583059
Katnbl1	-0.00711419	0.0177198	-0.0248274	-0.0405263	-0.0444239	0.0160297	0.052216	0.582592
Lbh	0.000922284	-0.0766933	0.0183859	-0.0808521	0.125925	-0.0307318	0.168888	0.582398
Chchd4	-0.0119555	0.0260974	0.0162292	-0.0223929	0.0112693	-0.0271838	0.0782875	0.582299
Crtap	-0.037678	-0.0166165	-0.0776325	0.0797497	0.0457807	-0.0275528	0.199386	0.582221
Arid4a	-0.0639801	3.95193e-05	-0.0531224	0.0138725	0.0377981	0.0224348	0.0773769	0.582082
Dnajb9	-0.0685155	-0.0626294	-0.00178036	-0.0679536	0.0511385	-0.0164509	0.235442	0.581955
Camta2	-0.0187502	-0.00277328	-0.000453993	-0.0173399	0.0242992	-0.00806385	0.0241376	0.581875
Mt2	0.322569	-0.457782	-0.196151	-0.314744	0.402231	-0.537737	0.43372	0.581715
Intu	0.0085869	-0.019947	0.00227438	0.0133333	0.0275213	-0.0123704	0.152288	0.581631
Tbc1d4	-0.00423307	-0.00509403	-0.00343796	0.0109574	0.0314792	-0.00580082	0.0400876	0.581605
Cops7a	0.0141994	-0.028735	-0.00332335	-0.0540706	0.0480091	-0.0251504	0.0264867	0.581537
Tmem185b	0.0194912	0.0127768	-0.00949407	-0.0182829	0.00769267	-0.0395145	0.010775	0.58127
Ccnl1	-0.151531	0.0779675	-0.244979	0.0630174	0.0452349	0.0772324	0.124513	0.581009
Fam129a	-0.0227449	0.010512	-0.0365316	0.0177286	0.0154902	0.00261704	0.0243764	0.58097
Mrps16	-0.0710082	0.0769761	-0.174882	0.0429048	0.15712	-0.0379495	0.0171022	0.580781
Comtd1	0.031512	-0.0051062	-0.040195	-0.0212613	-0.0473146	-0.0426619	0.0439073	0.580759
Manbal	-0.0308302	-0.0104069	-0.00640575	-0.0546348	-0.0222051	-0.0337638	0.0649996	0.580699
Zfat	0.0218388	-0.00206031	0.00217412	-0.00669784	0.00675593	-0.00997557	0.0210431	0.580663
Cebpd	0.040358	0.0369967	-0.0651681	0.0189515	-0.0791235	-0.0590904	0.174641	0.580646
Wisp2	-0.105202	-0.0694975	-0.0176462	-0.0837752	0.0165895	-0.0390381	0.365729	0.580643
Rbm25	-0.14552	0.0777856	-0.0676921	0.0287729	0.0370842	-0.0392565	0.237765	0.580561
Chaf1a	-0.0509111	0.0520204	-0.00597264	-0.0248086	0.0700157	-0.0483561	0.0593347	0.580521
Fastkd1	-0.0123533	-0.00187137	-0.00202781	-0.0138759	0.0114226	-0.00583739	0.0090434	0.580518
1600012H06Rik	-0.0129672	0.00822131	-0.000923024	-0.0067489	0.0349683	-0.0282749	0.0311087	0.58049
Eloc	-0.0484583	0.107729	-0.0759996	0.00577698	0.0246208	-0.00788786	0.0307311	0.580405
Soat1	-0.0519266	-0.100529	-0.118893	0.045355	0.24252	-0.0054999	0.183163	0.580405
Bnip2	-0.0688293	0.0036948	-0.000947431	0.00861866	0.0814733	-0.0549166	0.226656	0.579989
Krtcap2	0.204278	0.0173666	-0.168634	0.0809064	0.010005	0.00485123	0.111727	0.579863
Pigw	0.0122323	-0.000114652	0.0038436	-0.0173166	0.0269051	-0.00534345	0.0112531	0.579821
Kif18a	-0.00144988	0.00133468	-0.001288	-0.0220797	-0.0112378	-0.0291058	0.0374217	0.579604
Uqcrh	-0.0526008	-0.01334	-0.0749985	0.0294499	0.214882	-0.000858522	0.106195	0.579586
Selenok	0.113963	0.0279099	-0.246285	0.0745193	0.120859	0.0738954	0.0205585	0.579355
Capn15	-0.0115398	-0.00606228	0.00680712	-0.00718673	0.017376	-0.00914484	0.080959	0.579143
Cryz	-0.0225688	-0.046428	-0.0402536	0.0253574	0.11395	-0.0168653	0.112844	0.579122
Ostc	0.0726755	0.0435033	-0.157164	0.0276984	0.0260619	0.0680176	0.0122352	0.579004
Calm3	0.0136128	0.0126533	0.0160476	-0.0863171	0.0207596	-0.0299908	0.0416929	0.578991
Rorc	0.00246668	0.00882205	-0.0358465	0.019828	-0.0287994	-0.00887105	0.0881599	0.57895
Nop2	-0.00118348	-0.0167437	0.00885438	0.00327928	0.0614178	0.0093196	0.0851973	0.578878
Timm8b	-0.0270879	0.0138073	-0.0200683	-0.00461119	-0.0257218	-0.00524039	0.100919	0.577851
Sugct	0.0138179	0.0107991	-0.00639451	-0.0123764	-0.00470403	-0.0196515	0.00814088	0.577817
Slc25a20	-0.023336	0.0162303	-0.00561369	-0.0396087	-0.00181337	0.00233994	0.0177092	0.577654
Emsy	-0.0520643	0.0250028	-0.0211022	0.00636152	-0.00132862	0.00564333	0.132313	0.577017
Ndufb6	-0.0332101	-0.0244084	-0.0494593	-0.0607282	0.178565	-0.0027626	0.0380672	0.576861
Ttc27	0.0223892	0.0172109	-0.0135811	-0.0145864	0.0817561	-0.0270082	0.0112904	0.57683
Tbl1xr1	-0.0308927	-0.00306054	-0.0347843	-0.0190445	-0.00822025	0.0250182	0.0239386	0.576814
Fmn1	-0.0165691	-0.00663651	-0.0116126	-0.00100779	0.00473717	0.0123317	0.0408455	0.576735
Sgpp1	0.0135219	-0.00487079	0.00364046	0.000522498	0.00842979	-0.0141041	0.0432092	0.576629
Ocrl	0.00368344	-0.00174103	-0.0063168	-0.00435318	-0.0133641	-0.0188864	0.0551577	0.575859
Zfp61	-0.00314419	-0.00290947	-0.00672521	0.000499432	0.0112258	-0.00269639	0.00360465	0.575844
Tpm1	-0.0316797	0.123603	-0.0985414	0.13256	-0.0106253	-0.12473	0.379858	0.575802
Rpl36a-ps1	0.00411337	0.0140437	-0.00203834	0.000947442	0.0735253	-0.0239414	0.0323439	0.575729
Cry1	-0.0205054	-0.00287317	-0.0214623	-0.00256384	0.0369895	0.0503908	0.0527422	0.575717
Snx17	0.0148273	-0.0212389	-0.0567997	-0.029827	0.0828326	-0.0365211	-0.0117174	0.575705
Pdhb	-0.034759	0.0256984	-0.0954523	-0.00911384	-0.0090431	0.0571783	0.024218	0.575062
Arhgef7	0.0231345	-0.017746	-0.0401968	-0.0600882	0.139308	-0.0238384	0.00698263	0.575048
Capza2	0.0409179	-0.0123105	0.0172628	-0.0595576	0.0915677	-0.0725232	0.0746087	0.575039
Npat	-0.0348144	-0.00253299	0.00163562	-0.0297857	0.0219677	-0.0223287	0.0530735	0.574971
Fam110c	-0.0192669	-0.0439291	-0.00416759	-0.0633867	0.161108	0.000646917	0.0940285	0.574576
Cdon	-0.0651799	0.029913	-0.0367823	-0.00509991	0.149933	-0.00815042	0.0668961	0.574528
Gpaa1	-0.0140798	-0.00957639	-0.0277477	-0.0430084	-0.000214027	0.0057852	-0.013991	0.574316
Apmap	-0.00715661	0.0092157	-0.00655704	0.00712016	0.00513007	-0.00981649	0.0186887	0.574298
Mtmr6	0.0474009	-0.00927904	-0.0168454	-0.00332199	0.0066233	-0.00253909	0.0242238	0.573295
Sspn	0.0358586	0.0215395	-0.0136556	-0.022195	-0.0166037	-0.0199052	0.0182536	0.573235
Pde4d	0.0108263	0.0396913	-0.0197705	-0.0320297	-0.0231104	-0.0197996	0.0111277	0.573082
Hbp1	-0.0376388	-0.0236818	0.0134021	-0.0332649	0.111442	-0.0244488	0.126889	0.572623
Trmt2b	-0.00941545	-0.00566473	-0.00255633	-0.00163997	0.0398165	-0.021658	0.0364888	0.572615
Lncpint	-0.0187009	-0.00273238	-0.0347656	0.033478	0.0275602	-0.0234429	0.064626	0.572327
Znrd1	0.0733349	0.011396	-0.0814951	0.104919	0.192826	-0.0429986	0.106446	0.572177
Atp1b3	0.00760663	-0.0132644	-0.0119207	0.0388368	0.0449948	-0.0634113	0.179927	0.572071
Npc2	-0.105157	-0.083175	-0.0692655	0.108176	0.313455	-0.128336	0.486497	0.572026
Panx1	0.0028414	-0.000533423	0.00422254	-0.00147016	0.0058098	-0.0114653	0.0342248	0.571902
Ppp3cb	0.00572269	-0.0117724	-0.0332666	-0.0171201	-0.0376016	0.0197014	0.0603096	0.571796
Rnf219	0.0161552	-0.00137151	-0.000718692	-0.0189098	-0.0040157	-0.00554193	0.0130312	0.571737
Bdnf	-0.184945	0.0412595	-0.0556699	0.014849	0.0994868	0.00622844	0.303207	0.57162
Rap1gds1	0.0166456	-0.00962517	-0.0207581	-0.00863317	0.146468	-0.0262353	0.0484197	0.571374
Gtf2h4	-0.0181622	-0.00483946	-0.00424421	0.0124761	0.0526894	-0.01755	0.0691111	0.571333
Tbx15	0.0302857	-0.00964173	-0.0161071	-0.00339454	0.0109263	-0.00337047	0.00960845	0.570983
Ppan	-0.00322737	-0.00180646	0.001665	0.00735636	0.0335515	-0.0636261	0.125147	0.570884
Tmed5	0.0508795	-0.00218133	-0.00921764	-0.113492	0.0333358	-0.0275666	0.00880419	0.570881
Procr	0.129141	-0.0213566	-0.0471499	-0.0333156	0.0621382	0.026618	0.0323343	0.570636
Orc3	-0.014949	0.0106896	-0.0086617	-0.0242618	0.0279876	-0.021473	0.00202643	0.570622
Tpcn1	-0.0730374	0.005163	-0.0545178	0.0150181	0.192287	0.00222585	0.102754	0.570307
Kidins220	-0.0171958	-0.0156384	0.00534663	-0.0355555	0.0479415	-0.0135781	0.0445259	0.570054
Irak1bp1	-0.0219458	0.00432046	0.0247138	-0.0454935	0.0328253	-0.0327556	0.103358	0.569913
2610301B20Rik	-0.0269546	0.0320576	-0.0184532	-0.0220706	0.019821	-0.0147519	0.00246774	0.569799
Gm10131	-0.00528446	0.00346701	0.00024138	-0.000678363	0.00683663	-0.00563421	0.0105675	0.56953
Hcfc1r1	-0.154379	-0.0177041	-0.0873558	0.0492744	0.20718	-0.0713974	0.246967	0.56948
Fos	-0.26693	-0.0415305	-0.127455	-0.0167449	0.294404	-0.111268	0.288159	0.569478
Echdc1	-0.0174094	-0.0111483	-0.00181486	-0.0279051	0.0242568	0.00947094	0.0274657	0.569463
Zpr1	-0.0192635	-0.0380653	0.00678225	-0.0207052	0.0538984	-0.0269298	0.13146	0.569453
Bysl	0.0131787	-0.0153854	0.0139588	-0.0210157	0.0251935	-0.0131508	0.0600169	0.569385
Prkaa1	-0.0148981	0.0126127	-0.00845257	0.0144726	0.0237148	-0.0327981	0.0558228	0.569323
Spdl1	0.0379595	0.00152909	-0.00790783	-0.044359	0.00307491	-0.0126125	0.00823174	0.569245
Glmp	0.0222287	0.0265268	-0.135463	0.0444241	-0.0531265	0.0113822	0.0693025	0.569219
Nup35	-0.0155754	-0.00096476	0.00338042	0.00188268	0.0225492	-0.0010924	0.0590506	0.569203
Cdc16	0.0588981	-0.0227006	-0.00366989	-0.0691108	0.0741757	-0.0720568	0.0407737	0.569
Tecpr2	0.00186986	-0.00847571	-0.0020315	-0.0110587	0.0274723	-0.000926926	0.0117666	0.568979
Fars2	-0.0277615	0.0106788	-0.0148066	-0.0276531	0.0313003	-0.0166832	0.00192502	0.568838
Coq6	-0.00527009	0.000824401	0.0103101	-0.0641507	0.0337764	-0.0110349	0.0279534	0.568416
Cpsf3	-0.044086	-0.0194307	0.00349744	-0.0201689	0.105772	-0.0175209	0.111833	0.5683
Pros1	0.029036	-0.0293715	-0.0247658	0.0342194	0.00991452	0.00349589	0.139209	0.568262
Zfp780b	-0.00143112	0.00245109	-0.00017891	-0.0203811	0.00283711	-0.000660045	0.00361706	0.568146
Pgd	-0.0545566	-0.000672775	-0.00522192	-0.109862	0.141735	-0.0582351	0.0542055	0.568097
Setd7	0.0111668	-0.0123932	0.0151597	-0.0286331	0.0216773	-0.0146756	0.0552958	0.567841
Rint1	0.00205163	0.00495741	-0.0128895	4.54091e-05	-0.00520938	-0.00620529	-0.000103243	0.567833
Gnpnat1	0.0104941	0.00141141	-0.00461043	0.00893563	0.0680806	-0.0311779	0.0413469	0.567816
Atxn3	-0.0289733	-0.046913	-0.0511681	-0.00156869	0.0307488	0.0498879	0.0908789	0.567636
Gm9493	0.0801638	-0.0367529	-0.0178171	-0.00756886	0.26358	-0.0735427	0.123788	0.567467
Axl	-0.0631678	0.0325921	0.0418304	-0.0349394	0.0811864	-0.102009	0.295128	0.567428
Cnot2	0.0527744	-0.0263699	0.000533019	-0.0395557	-0.018441	0.00814457	0.11329	0.567421
Elovl5	-0.0187353	0.00864658	-0.0270329	0.0121888	0.153606	-0.0240826	0.0646139	0.567391
Pld3	-0.0374432	-0.0189228	-0.0416111	0.0183373	0.0246487	0.0309392	0.0918809	0.567339
Rpl27-ps3	0.0445584	0.00193971	0.00247183	-0.0202183	-0.00383153	-0.00498077	0.0386965	0.567026
Arhgdig	0.0309409	0.0563086	-0.0136184	-0.0013111	0.0211144	-0.0269171	0.0132443	0.566525
Prpf39	-0.0142476	-0.0209566	0.00095736	-0.0143497	0.0199078	-0.0100684	0.0636843	0.565926
R3hdm1	0.0690456	-0.0189402	-0.0255058	0.00480771	-0.0450664	-0.0146064	0.196776	0.565549
Wdr54	-0.015659	-0.0106963	-0.0208875	0.0037062	0.0268992	0.00643387	0.0190087	0.565537
Slc25a10	0.0247101	-0.00117164	-0.00462777	-0.0306183	0.0537896	0.000931217	0.00703162	0.56474
Smim4	0.121152	0.00362523	-0.0703061	0.0050038	0.0388623	-0.0156982	0.0209297	0.564467
Ahr	0.0303959	0.0513418	-0.0638731	-0.064584	-0.126152	-0.00827254	0.128898	0.564231
Lrrc40	-0.0133917	0.0114094	-0.00228836	-0.0267519	-0.0248346	-0.0206501	0.0688203	0.564097
Rcor2	-0.0167097	0.00776303	-0.0180441	0.0645646	0.0636242	0.00207583	0.147614	0.564094
Clock	-0.0527267	0.0213022	-0.0136497	-0.00418357	0.0378944	-0.0046334	0.0560367	0.563878
Nup160	0.0148075	0.00244583	-0.00619339	0.0227418	0.0253422	-0.00839252	0.0320575	0.563785
Map2k1	-0.0816231	0.00113871	-0.0178099	0.00791669	0.064088	-0.0442013	0.163226	0.562905
Kdelc1	0.0045782	0.0204429	-0.0102352	0.0113566	-0.0127489	-0.00181018	0.04276	0.562822
Lmbrd1	-0.00676157	0.01595	-0.0314499	0.00297125	-0.0155067	0.0296879	0.0358558	0.562615
Plekha3	0.0265094	-0.021683	0.00099911	-0.0262484	-0.00881778	0.0234521	0.0955917	0.56258
Mrps25	0.0664376	-0.0324424	-0.0321527	0.00971381	0.138953	-0.0456316	0.0621574	0.562512
Myo6	-0.0593684	-0.0414174	-0.0124452	-0.0569208	0.101441	0.0252611	0.0975201	0.562271
Zc3h15	-0.0697412	0.0453088	-0.0281461	-0.0344758	0.0595183	-0.0640118	0.0356154	0.562085
Erc1	-0.027814	-0.0262812	-0.00299386	0.00505751	0.0739828	-0.0210703	0.113173	0.561943
Slc25a37	-0.0282768	0.045717	-0.156709	0.0786839	-0.018543	0.0328542	0.100501	0.561735
Rhoq	0.091177	0.00474543	-0.0467433	0.0259636	0.000315434	-0.0152979	0.0567771	0.561702
Gm10260	-0.0640091	-0.0036743	0.00981987	-0.0792857	0.177462	-0.0704549	0.115718	0.561498
Api5	-0.0509247	0.0393109	-0.0132681	0.0204699	0.0351097	-0.0269688	0.101207	0.561163
Il13ra1	-0.0253825	0.00137523	-0.0531608	0.0601232	0.00790362	-0.0278528	0.159304	0.5609
Pgp	-0.0241299	-0.00362364	-0.0367158	0.0579425	0.110528	-0.0166557	0.108192	0.560609
Grhpr	0.0151029	-0.0319039	-0.0321811	0.0328037	0.0830799	-0.115641	0.147471	0.560276
Exosc7	-0.0319732	-0.0541148	-0.0222337	-0.0115109	0.0308737	-0.019467	0.104469	0.560131
Acsl1	-0.0117828	-0.0196103	-0.000303985	-0.00341352	0.0862991	-0.0246	0.0735358	0.559955
Fndc3b	0.0661972	-0.0595799	-0.108883	0.0803463	-0.0153729	0.0415925	0.232744	0.559714
Lrba	0.0305929	-0.0148143	-0.00815549	-0.0557835	0.0169908	-0.00883788	0.00666704	0.559667
Gsta4	-0.138023	-0.0496768	-0.0402365	-0.0941726	-0.0391165	0.0121027	0.354259	0.559041
Sav1	-0.0700145	0.00470613	0.0249206	-0.0370248	0.0858076	-0.0528046	0.185706	0.559024
Zcchc4	-0.00614898	0.00543391	0.00549405	0.00382181	0.0163071	-0.00977776	0.0384005	0.558809
Psmc3	-0.0128089	0.00328025	0.0176163	-0.0876553	0.160584	-0.0607796	0.0746127	0.558622
Pkp4	-0.00937825	-0.0151162	0.00636418	-0.0111081	0.0992351	-0.0204266	0.0738376	0.558494
Ldha	-0.044369	0.014672	-0.0889402	0.114485	0.273821	-0.160678	0.233615	0.558457
Pigf	0.0480465	0.013111	-0.015625	0.0167719	-0.00331244	-0.0208911	0.0459504	0.558021
Slc2a1	-0.0833709	-0.0224046	-0.0361975	0.0013042	0.160947	-0.135035	0.173054	0.557875
Gpr180	0.112119	-0.00435362	-0.053927	0.0237513	0.0559385	0.00725126	0.0360687	0.557712
Mzt1	0.00466444	-0.000833035	0.00459448	-0.0143396	0.0249916	-0.0589955	0.0627126	0.557699
Lrrc1	-0.0234434	0.00256787	0.00113225	-0.0311075	0.010287	-0.0151171	0.0213068	0.557631
Ak4	-0.00529744	-0.00356832	-0.0299098	0.0165351	0.0712066	-0.0373697	0.0321521	0.556715
Fbln2	0.169884	-0.0580662	-0.152255	0.13284	0.16418	-0.292173	0.295271	0.556656
Spire2	-0.0133255	-0.00235592	0.00394622	-0.0304279	0.0244096	-0.00934713	0.0185676	0.556453
Sec61a2	-0.00687717	0.025704	-0.0398156	0.00235462	-0.0317621	-0.0217146	0.0252959	0.556235
Rpap1	-0.00203817	-0.0036745	-0.0116212	-0.0100713	0.00505315	-0.000161136	-0.00700979	0.556208
Uck2	0.0475059	-0.0444318	-0.0676453	0.0576447	0.0682203	-0.0374386	0.0875972	0.555783
Rpa3	0.0852123	0.0761498	-0.0884218	0.0269105	0.0415788	-0.0381138	0.00169188	0.555408
Mrps10	-0.0416799	-0.0114949	-0.0178727	-0.0283924	-0.0261659	-0.0474729	0.0934911	0.555051
Mbnl2	-0.107839	0.0643337	-0.137851	-0.0248821	0.119455	0.0152486	-0.00678084	0.554924
Rft1	0.0333469	0.026633	-0.0235278	-0.0142813	0.0111781	-0.00768263	-0.00745816	0.554863
Rc3h2	-0.024002	0.024745	-0.0333248	0.0320723	-0.0139894	-0.0167651	0.105484	0.55462
Cdk20	0.00604756	0.00440643	-0.00196115	-0.0116712	-0.0079086	0.000941137	0.00852309	0.554277
Dcaf13	-0.0183222	0.0231988	-0.0265148	0.00976458	0.0660733	-0.019487	0.0174062	0.554205
Eif1b	-0.0694195	-0.06497	-0.0416759	0.0258197	0.117035	-0.0861303	0.217399	0.553879
Ints7	-0.0189729	-0.00113345	0.0108216	-0.0157484	0.0245858	-0.0130078	0.059585	0.553675
Cep152	-0.0126418	9.55713e-05	0.00116836	-0.0117063	0.00929441	0.00038811	0.0162751	0.553456
A130051J06Rik	0.00255433	-0.0133184	-0.0154142	-0.0193621	0.0571215	0.0181223	0.0131937	0.553281
Ube2c	0.060824	-0.0102685	-0.203249	0.08867	0.0175517	-0.112136	0.0591127	0.553259
Diaph2	-0.0203162	-0.0124254	0.0112128	-0.0364365	0.0324784	-0.0020453	0.0561854	0.553136
Farp1	-0.00720121	0.0311471	-0.0684519	0.0325906	0.0243848	-0.0039259	0.0113019	0.553127
Laptm4a	-0.0515355	0.012568	-0.0662957	0.0844753	0.00510882	-0.0146143	0.270343	0.553119
Socs5	-0.0120569	-0.0282926	-0.0280357	-0.0178577	0.00313552	0.0198865	0.0201677	0.553099
Fnip2	-0.00509527	0.00590606	-0.0296317	0.0296827	0.0131795	-0.019905	0.0387024	0.553017
Sptssa	-0.0603257	-0.047515	0.0193252	-0.0362697	0.153025	-0.0692376	0.217999	0.552885
Gripap1	-0.0298445	-0.00546283	0.00249252	-0.00900613	0.0177619	-0.00303986	0.0831479	0.552332
Alkbh8	-0.0189547	0.0019031	0.00377454	-0.0597393	-0.0164067	-0.0194679	0.0459392	0.552131
Ppm1f	0.0127285	-0.00389548	-0.00572307	0.00519601	-0.00709739	-0.00434987	0.0392683	0.552071
Btd	-0.00640435	0.0110717	-0.0679004	0.020663	0.0413294	-0.00829501	-0.00218687	0.55171
Ccdc22	-0.0427644	0.00738176	-0.0161998	-0.00168645	0.010133	-0.02299	0.0505242	0.55162
Fundc2	-0.0503984	-0.000145662	-0.0787961	0.0449391	-0.0344764	-0.00261009	0.17731	0.551364
Bccip	0.0369878	0.00973025	0.015579	0.0095637	0.0138938	-0.0154915	0.0674208	0.55128
Cstf3	-0.00303617	0.00869833	-0.000817437	0.000418924	0.0441468	-0.0427826	0.0393311	0.551103
Ssb	-0.0597653	-0.0227673	0.0153331	-0.028665	0.109288	-0.0729797	0.177422	0.550921
Sprtn	0.0120231	-0.00655531	0.000359252	-0.0021088	0.00732479	-0.0115989	0.0193443	0.550723
Fam114a2	-0.0182219	-0.000934454	-0.0133952	-0.0603961	0.0412468	-0.0638289	0.0029301	0.550602
Pon2	0.0740553	0.00941748	-0.0964558	0.0327137	0.0149714	0.0384908	0.0247241	0.550307
Nmt2	-0.0595844	0.0021927	-0.0212139	0.00562865	0.0632024	0.0128103	0.078768	0.550269
Nudt6	-0.0113604	0.00669012	-0.0155085	-0.0268954	0.0135764	0.0134261	-0.00400039	0.54997
Slc25a29	-0.00353034	-0.00954706	-0.012564	0.00382642	-0.000613819	-0.0079092	0.0130297	0.549942
Dolk	-0.00943806	-0.00543895	0.00374278	-0.017144	0.0196521	-0.00556762	0.0196364	0.549942
Ppp1r11	0.0706692	0.000865257	-0.00136843	-0.075552	0.0693201	-0.0994559	0.0391574	0.549702
Npepps	-0.0313667	-0.0153512	-0.00847644	-0.000856903	0.0588923	-0.0586031	0.0870433	0.549645
Iah1	-0.00282634	-0.0563917	0.0127427	-0.026389	0.116108	-0.0456447	0.140263	0.54958
Arf4	-0.0631109	0.0995715	-0.273383	0.110528	0.0829068	0.0544346	0.0547715	0.549369
Mrps5	-0.063262	0.0157782	0.0157423	-0.0903073	0.0681799	-0.0645026	0.0788596	0.549237
Klhdc3	-0.0202974	-0.00685913	-0.0125857	-0.0296218	0.150699	-0.00293683	0.0519527	0.548859
Sgsh	-0.00157117	-0.00444534	0.00157293	-0.00872033	0.0066317	-0.00861333	0.0100917	0.548348
Cd14	0.0435373	0.0123393	-0.0744695	-0.0220977	0.247174	-0.0324159	0.0137058	0.548299
Atat1	-0.0114864	0.00930006	-0.00637876	-0.00396999	-0.0145556	-0.0142494	0.0459813	0.548265
Maoa	-0.0589938	-0.03317	-0.0351412	-0.00969549	0.106019	-0.0425697	0.0721485	0.548238
Tkt	0.181547	0.0100349	-0.126278	-0.12524	0.142788	0.0372892	-0.0469108	0.54821
Gdf11	0.0177594	-0.00885885	-0.00364489	0.0138299	0.0255036	0.000553282	0.0286961	0.548085
Plag1	-0.00169816	-0.00629639	-0.00473074	-0.0182541	-0.00710755	-0.0205635	0.00577003	0.547829
Zbtb10	-0.0109762	0.00512217	-0.0221272	0.0117767	-0.0254567	0.00222763	0.10077	0.547802
Mrpl57	0.137043	0.00336969	-0.0904621	-0.0261874	0.131793	0.00313444	-0.0123226	0.547623
Pcbd2	0.0268542	-0.0308659	-0.0469169	0.0142184	0.0189512	-0.0152101	0.0211475	0.547272
Ammecr1	0.0509388	-0.015463	0.00019056	-0.0677581	0.0240676	-0.0225943	0.0226792	0.547188
Clic1	0.0803993	-0.0852975	0.0029709	-0.107913	0.262756	-0.042279	0.117181	0.547168
Smad7	-0.0111988	0.0571918	-0.224542	0.127669	0.0191338	0.06122	0.110302	0.547128
Elk1	-0.0266282	0.00336031	-0.00430818	-0.00466672	0.0336639	-0.00366801	0.0309131	0.546809
Ywhaq	-0.047727	0.0617725	0.0372861	0.011309	0.0713426	-0.0741429	0.236571	0.546628
Trmt10a	-0.0803478	0.00478985	-0.0255321	-0.103735	0.00497378	0.0361282	0.0546054	0.54635
Yap1	-0.0202114	0.0205368	-0.0377963	-0.0508184	-0.060681	-0.0526584	0.0189561	0.546291
Acp1	-0.0103208	-0.0739724	0.0479905	-0.125145	0.270943	-0.122356	0.22697	0.54619
Gm13203	-0.0324909	-0.00438671	-0.0126002	-0.0154208	-0.00893083	-0.0159385	0.032554	0.546178
Arhgap1	-0.0244215	0.000409977	-0.00670442	-0.0314661	0.0359279	-0.0167664	0.0088726	0.546159
Rpl14	0.0293023	-0.0872196	0.0545309	-0.0595223	0.18198	-0.0682439	0.267227	0.545644
Psmb4	-0.0301017	0.000610792	-0.115822	-0.0398572	0.118118	0.00911397	-0.0389603	0.545295
2007-03-01	-0.0978203	0.0259134	-0.0166078	-0.0653515	-0.00118618	-0.0472888	0.0815384	0.545183
Gars	-0.0358671	-0.0626462	-0.0297675	-0.0338117	0.218869	-0.00601397	0.11216	0.545064
Exosc9	-0.0272683	-0.0156064	-0.0372554	0.00303278	0.00425561	0.0334637	0.0532187	0.545055
Polr2k	-0.0433035	0.0749654	-0.180723	0.0953527	-0.00265696	0.00883145	0.0864136	0.544644
Papd7	0.014935	0.000224004	-0.00589816	-0.00805514	-0.0191757	-0.0141132	0.0393831	0.544562
Pgm2	-0.0551128	-0.0334067	-0.0951662	0.05023	0.158857	-0.0314075	0.0872223	0.544512
Gaa	-0.0442417	0.00348271	-0.0132234	0.00191776	0.00250121	-0.0440741	0.113891	0.544505
Tet2	-0.0772719	0.00517776	-0.0963684	-0.00316424	0.193777	-0.0477359	0.0344864	0.544417
Uchl3	0.147789	-0.0527593	0.0109721	-0.105639	0.269696	-0.0557085	0.103345	0.544358
Gfod2	-0.100638	0.0212485	-0.00808336	-0.111206	0.114728	-0.116505	0.0718359	0.544023
Tjap1	-0.011002	-0.00529031	-0.0154538	0.00760536	0.0784689	-0.0195217	0.0364532	0.543975
Tpt1	-0.0404765	0.0179684	-0.309333	0.0997562	0.0299529	0.0984193	0.0742632	0.543753
Csf1	-0.142318	0.137224	-0.240593	0.136899	0.0899628	0.0278537	0.142905	0.543424
St3gal2	0.00915745	-0.00469695	0.00084641	-0.0141456	0.00940345	-0.0258453	0.0170511	0.543195
Mybl2	-0.0222911	0.0273147	0.00190534	-0.0299247	0.0232904	-0.0216618	0.0180437	0.542991
Zscan29	-0.00815077	-0.00445395	-0.00592808	-0.00999835	-0.00215568	0.00644041	0.0082408	0.542975
Elf4	-0.0259503	0.00116144	-0.00238241	-0.0129725	0.0149147	-0.0105898	0.025528	0.54292
Fas	-0.0255787	0.0225912	-0.0248081	0.00376048	-0.0340463	-0.00188828	0.094435	0.542861
Ets1	-0.0667264	0.126779	-0.137161	0.0795041	-0.055681	-0.0820299	0.173028	0.542762
Piga	-0.00496578	-0.00601175	-0.0137636	0.0176949	0.035728	-0.0209664	0.0360334	0.542627
Them4	0.0180082	-0.0234225	-0.0140992	-0.0110174	0.00477591	0.0188068	0.0276847	0.541973
Zfp948	-0.00286372	0.00887757	-0.00260369	-0.0362756	0.0453689	-0.0256025	0.00417588	0.541921
Tfe3	-0.0464661	0.0326944	-0.0122904	-0.0223876	0.0059351	-0.00960887	0.0330311	0.541913
Gusb	0.0332185	0.00452624	0.0249107	-0.129368	0.101934	-0.0508861	0.0437091	0.541754
Tmem123	-0.011151	0.0120019	0.000786389	-0.010289	0.153876	-0.0395711	0.0672391	0.541442
Scarb1	-0.0215165	-0.0138623	-0.0218801	0.0222478	0.097241	-0.0163319	0.0666784	0.541295
Serf2	-0.0943754	0.0480359	-0.0761222	0.0573694	0.0634557	0.0618205	0.139852	0.54099
Nup214	-0.0500979	0.0496715	-0.0269693	0.00862391	0.133893	-0.0518793	0.0579831	0.54097
Wdr3	-0.011942	0.00521569	0.00160701	0.00528598	0.00934865	-0.018239	0.0557188	0.540816
Rad21	0.0214201	0.0430573	-0.0639469	0.00880338	-0.034089	-0.0152707	0.0163388	0.540617
Osgepl1	-3.20838e-05	-0.0047567	-0.0104222	-0.0211596	0.0318644	-0.0119709	-0.00321072	0.539949
Cdc6	0.0024522	0.0120417	-0.00148078	-0.0294895	0.0727315	-0.0191674	0.0116738	0.539938
Nmnat3	-0.0136367	-0.000950174	-0.00230587	-0.00277413	0.00600806	-0.002021	0.0195309	0.539877
Rps23	0.00137965	0.00574501	0.0295899	-0.104955	0.0794806	0.0140924	0.0576362	0.539858
Uhrf1bp1l	-0.015006	-0.0313327	-0.0280266	-0.0170331	0.0151702	0.0632877	0.0828312	0.539719
Prdx4	-0.173591	0.00511466	-0.0170887	-0.0481385	0.136772	-0.0335748	0.207973	0.539515
Rnf19b	0.0686717	-0.0964102	-0.0698547	-0.00626922	0.201994	-0.0140783	0.0774495	0.53924
Exosc10	-0.00927949	-0.0165407	0.00825681	0.00413831	0.0185664	-0.0263091	0.145353	0.539213
Crybg3	0.00344083	-0.00446823	0.00894891	-0.018785	0.00607897	-0.0122151	0.029733	0.539176
Tbck	-0.00966193	-0.00685125	-0.025771	0.00933553	0.00799305	-0.000541735	0.00897907	0.539085
Safb2	-0.0684592	-0.0131633	-0.00119626	-0.0826199	0.049221	-0.0292698	0.0523477	0.538881
Stam2	-0.0615912	0.0177634	-0.0238744	-0.0336115	0.071016	-0.0300319	0.0221127	0.538506
Rtraf	0.0217823	0.0141653	-0.161885	0.072139	0.0377443	0.0864713	0.0564339	0.538303
Mgarp	-0.0387101	0.0206018	-0.0520265	0.0342822	-0.0275279	-0.0129604	0.115673	0.538115
Batf3	-0.00711454	-0.0279428	0.015814	-0.0425066	0.0310515	0.00409943	0.0779168	0.537483
Zw10	-0.0129364	0.0105743	0.00543526	-0.0267675	-0.0022744	-0.0085206	0.025436	0.537468
Pcmtd2	0.0349928	-0.0124968	-0.0192126	-0.0454813	-0.033124	0.00313099	0.0306768	0.537385
Rnd1	0.0120762	-0.00182104	-0.00507367	-0.00989834	0.00225994	-0.00974862	0.000441853	0.537246
Fmnl2	-0.0233388	-0.0189858	-0.00441982	-0.0113216	0.0266145	0.019515	0.0594442	0.537171
Slc4a1ap	-0.0309578	0.0127669	-0.0179076	-0.0229165	0.00343548	0.00117097	0.00223434	0.537163
Tmem175	-0.0174106	0.00976365	-0.00887892	-0.0276468	0.0490619	-0.00483418	0.00407176	0.537151
Jkamp	-0.0427021	-0.00855658	0.0105569	-0.00669007	0.0520363	-0.0142505	0.119401	0.537105
Ube2a	-0.00949617	-0.0413167	0.0216928	-0.0271706	0.0748074	0.014073	0.130317	0.536847
Slc25a5	0.138778	-0.0806866	0.110881	-0.137685	0.278773	-0.136827	0.31585	0.536788
Prcc	0.0399191	0.00909109	-0.0688992	0.0690809	0.0249653	-0.0141262	0.059942	0.536784
Enah	-0.0224711	-0.0046885	-0.0384742	0.0496846	0.136082	-0.0492524	0.0940886	0.536647
Hadhb	-0.0226413	0.00742691	-0.00479025	-0.0206119	0.0252202	-0.0222749	0.0103997	0.536596
Pfkfb4	-0.016025	-0.0100369	-0.017101	0.0160516	0.0112158	0.00947156	0.0564123	0.536475
Elf1	-0.0679701	0.0237394	-0.104121	0.0662803	0.00736135	-0.00115674	0.105825	0.536414
Ndufa1	-0.0420579	-0.043865	0.0157222	-0.0429162	0.296069	-0.0895685	0.197642	0.536061
Rab11fip1	-0.00460174	0.0194665	-0.00115185	-0.0129179	0.0164134	-0.0323202	0.013923	0.535953
Adi1	-0.00951387	-0.018918	-0.00977836	-0.0101189	0.00117501	0.0194618	0.0481183	0.535862
Cstf2	0.000445176	0.0101494	8.54513e-06	0.00285469	0.0718385	-0.0412973	0.040922	0.535331
Srp14	-0.0123327	-0.0227568	-0.0440777	0.0225206	-0.0148922	0.0172047	0.0950597	0.534836
Myd88	-0.0375355	0.00391978	0.0140407	-0.0571137	0.0424907	-0.0171703	0.0510492	0.534749
Alkbh1	0.0108222	0.00495737	0.034552	0.00386325	0.0768241	-0.0455207	0.123029	0.534726
Polk	-0.0178487	0.00717305	-0.0233072	-0.0065634	-0.0327742	0.0110277	0.0643469	0.534685
Derl2	0.0204168	0.0409657	-0.0337785	-0.0665254	0.0555458	-0.0525886	-0.0288438	0.534176
Kcnq1ot1	-0.0963431	-0.0519101	-0.0571124	0.125815	0.151249	-0.0284716	0.419791	0.533994
Hs1bp3	-0.0221522	-0.00496122	0.00411326	-0.0178382	0.0196226	-0.0105109	0.0359383	0.533865
Dennd5b	-0.0393959	0.0266935	-0.0203959	-0.0475004	0.0219972	0.0186505	0.00578917	0.533796
Cwc25	-0.0464897	0.0260904	-0.0130803	-0.00708783	0.00293678	-0.0263448	0.0524501	0.533558
Rap2a	-0.0484063	0.00281256	-0.0342126	-0.000593654	0.0948546	-0.0165824	0.0346977	0.533461
Tmem173	0.0107422	-0.000321668	-0.0353452	0.00639447	0.00117429	0.0533825	0.0391191	0.533209
Rhoa	-0.0506379	0.0053238	0.0133961	-0.0117442	0.0135501	-0.0607788	0.213622	0.53282
Pdk1	-0.0182692	-0.0174218	0.0142238	-0.0305647	0.0310702	-0.069991	0.113479	0.532648
C330027C09Rik	0.00207396	0.0235394	0.00677385	-0.0498706	-0.0124621	-0.0348012	0.0325047	0.532504
Stx8	0.0877476	-0.0526542	-0.0210644	-0.012932	0.0175917	-0.0418927	0.0861413	0.532431
Dhrs7b	0.0539907	0.0165204	-0.0290606	-0.0418863	0.0468596	-0.0185426	-0.0177444	0.532044
Mxd3	-0.0324271	0.00645399	-0.00187277	-0.0266766	0.0349205	-0.0300687	0.0247493	0.532039
Ppig	-0.130291	-0.013612	-0.00246509	-0.0527457	0.105886	-0.0808818	0.177948	0.532025
Helq	0.00573036	0.00719974	0.00197197	-0.0146021	0.0468457	-0.00447023	0.00943857	0.531947
Vps26b	-0.00294328	-0.00772424	-0.00452647	-0.0278796	0.0173246	-0.022655	0.000507153	0.531852
Snx21	-0.0297466	0.0158723	-0.00427483	0.000162217	0.0184449	-0.0153472	0.0378664	0.531838
Ccnyl1	-0.0131984	0.00720677	-0.007058	0.00985864	-0.00271977	0.00382752	0.0508206	0.531353
Brwd3	-0.00529371	-0.00999937	-0.000205115	-0.002772	0.0224659	-0.0113406	0.0241226	0.531291
Btbd1	0.0304762	-0.012778	-0.0406242	0.0782036	0.133095	-0.0385961	0.103882	0.531197
Il11	-0.31544	-0.0574216	-0.185507	0.167206	0.569421	0.000709916	0.521971	0.530979
Rfesd	0.0223292	-0.00389216	0.00456481	-0.0370062	0.00677659	-0.00505474	0.0150802	0.53075
Rpl39	-0.127989	0.003894	-0.0338435	0.0477998	0.14308	-0.024368	0.22883	0.530634
Eif4b	0.0351207	0.0754798	-0.105417	-0.00796233	-0.0829687	0.0210794	0.0432088	0.530335
Cdk14	-0.0253259	0.0133497	-0.0148754	-0.00615224	-0.0616587	-0.00255928	0.254709	0.530228
Armc1	-0.0489725	-0.00919643	-0.0346798	0.0302371	0.0719846	-0.0224712	0.0782123	0.529956
Atp6v1a	0.0162463	0.0112402	-0.0399027	0.0262921	-0.0170582	-0.014281	0.0367027	0.529751
Tnip1	-0.0501456	-0.0423365	-0.0151336	-0.0122064	0.0530073	-0.0153869	0.0928209	0.529621
Slc4a7	-0.0192884	0.0804414	-0.121198	0.0890675	-0.0355029	-0.0439692	0.121483	0.529618
Pgm3	-0.0139988	-4.68872e-05	0.000479048	0.00402803	0.00823376	-0.0166639	0.0561393	0.529592
Uqcc1	-0.00513769	-0.000914845	0.00129246	-0.0187828	0.0266187	-0.00238163	0.00803461	0.52955
Rpl7l1	-0.0361992	-0.00827558	0.0296661	-0.049145	0.164042	-0.114427	0.152062	0.529478
Tmem38a	0.00373318	0.0223544	-0.0241675	-0.0175856	0.0264444	-0.0192306	-0.0158301	0.529316
Rmdn2	-0.00874085	-0.0031686	-0.00270027	0.000335292	0.00116751	-0.00621869	0.0232389	0.529305
Zfyve19	0.00337341	-0.0107785	0.0129834	-0.0180441	-0.000789684	-0.00550047	0.0844875	0.529197
Mcu	0.00228389	-0.00388582	-0.00984198	-0.01455	-0.0225936	0.00649922	0.033825	0.529022
Rcn1	-0.0645529	0.106185	-0.0399174	0.0931143	0.0572603	-0.0356042	0.181267	0.528742
Osr1	-0.0218872	0.00542441	-0.0082314	-0.00295932	0.0145937	0.00576923	0.0168724	0.528517
Chd8	-0.0224399	-0.00531298	-0.0269073	0.00847152	0.0314614	-0.00487807	0.0145148	0.528156
Maml3	0.0245401	-0.0304981	-0.0290312	0.0235713	0.00186264	0.0327618	0.0939419	0.528009
Uchl5	-0.000420056	-0.000341187	0.0202872	0.00415809	0.0428564	-0.0142596	0.0759828	0.527626
Ghr	-0.107666	-0.0279169	-0.0466719	-0.0335082	0.0968335	0.00711276	0.075692	0.527012
Pfdn6	-0.0631914	0.0428802	-0.000638509	-0.0586243	0.0266409	-0.115767	0.0853038	0.526961
G2e3	0.0739839	-0.0467464	-0.00243758	0.00909346	0.0278113	-0.0524159	0.139592	0.526837
Lrp12	-0.0111832	-0.0133636	-5.1063e-05	-0.0201215	0.0617102	-0.0149824	0.0299637	0.526754
Trmt11	-0.0273712	-0.0101028	0.00263646	-0.00701089	0.00565434	-0.00369878	0.10411	0.526384
Tigd2	0.0156493	-0.00589442	0.00478759	-0.0424466	0.0172648	-0.0311986	0.0150881	0.526333
Rab3a	-0.0265994	0.00863325	-0.0201093	-0.00180913	0.0292632	-0.0100762	0.00692413	0.526095
Ptch1	-0.0102075	-0.00243688	0.0104264	-0.0419415	0.00459124	-0.00734008	0.0332778	0.525812
Ndufs3	0.0125891	-0.0537725	0.0302141	-0.045994	0.0801845	-0.0708794	0.152673	0.525808
Gm17092	-0.00622316	-0.00408113	0.0010692	-0.0117431	0.00537725	-0.00451633	0.00779862	0.525776
Rpl4	-0.0624593	-0.0723131	0.0578196	-0.0743305	0.190226	-0.0523735	0.2872	0.525627
Rab31	0.0279732	-0.002379	0.0170456	0.0093037	0.0176127	-0.0251457	0.0936015	0.525309
Adar	-0.0280448	-0.0240192	-0.0102675	0.00399783	0.00306462	-0.0241504	0.12329	0.524785
Csnk1g1	-0.0335687	0.0133375	0.0143153	-0.0622452	-0.00712179	-0.0477043	0.0769591	0.524441
E2f6	-0.0271105	-0.00303325	-0.00330002	-0.0356873	0.117878	-0.0221846	0.0405358	0.524272
Brap	-0.024361	-0.00179896	-0.0109295	0.0280259	0.0109741	-0.0122452	0.122169	0.524255
Tns4	0.0792891	-0.11771	-0.136119	0.0454938	0.332061	-0.0473263	0.106876	0.52425
Rsbn1	-0.150733	-0.0231284	-0.149639	0.135218	0.0915274	0.0165092	0.307062	0.524006
Rps15a	-0.028046	0.0719924	-0.0415277	0.0404883	-0.0186972	0.00783667	0.0969778	0.52399
Efna2	-0.0138101	0.000622821	0.00574402	-0.0184572	0.00466564	-0.00496566	0.02696	0.523936
Ccp110	0.0355648	0.00434306	0.00541898	-0.0188118	0.00591286	-0.0115948	0.0206885	0.523861
Zfp942	-0.000248524	0.0247982	-0.00310859	-0.00757722	-0.00256967	-0.0245838	0.0168902	0.523797
Ccdc51	-0.0058202	0.00197206	0.000419905	-0.0013282	0.0187909	-0.0125997	0.0140018	0.523611
C1qtnf12	0.0117509	0.000724753	-0.102535	0.0367972	0.278853	-0.0074426	0.0428179	0.523604
Fat1	-0.0282245	0.0112788	0.00675925	-0.0151	0.065429	-0.0733646	0.0740334	0.52354
Zfp639	-0.0156851	0.0179206	-0.0499046	-0.056587	-0.0232763	0.0544338	0.0106634	0.523449
Usp11	0.00510882	-0.00454357	-0.0124461	0.0119048	0.0199135	0.0282225	0.0261746	0.523391
Agl	-0.0424197	-0.0621582	-0.00737549	9.40915e-05	0.0314251	-0.0468869	0.23297	0.523377
Mtmr2	-0.0317447	0.0452484	-0.0437994	-0.133134	-0.110879	0.067593	0.131779	0.523173
Zbtb40	-0.00127067	0.00684849	-0.00286806	-0.0111807	-0.0110636	-0.00467126	0.0093828	0.523073
Foxo4	-0.00760038	0.000773444	0.00338686	-0.0149491	0.00343545	0.00566028	0.0165883	0.52296
Tcerg1	-0.0125907	0.00474363	0.00826449	-0.0285595	-0.0122801	-0.0438433	0.0783293	0.522866
Ldhb	-0.0699297	0.022014	-0.0716629	0.0405836	0.20295	-0.0671703	0.0808182	0.522819
Ash1l	-0.0725319	0.00273559	-0.0584231	0.0580494	0.0600441	-0.0311531	0.121652	0.522621
Ddx31	-0.00566488	-0.000336592	-0.00098661	-0.0149677	-0.00402256	-0.0117464	0.00476051	0.522134
Arf3	-0.00922224	0.0682933	-0.0982886	0.0100604	-0.00324637	0.0466238	0.00606647	0.521942
Prmt6	-0.0169407	0.00564803	-0.0141994	-0.00844766	0.0357982	-0.0155315	0.00254068	0.521921
Gnai3	-0.000564312	-0.0118172	-0.022193	-0.0206149	0.0842119	0.00398879	0.00790321	0.521768
Tmem106b	-0.0413731	0.0506395	-0.0363314	-0.00691911	-0.0204896	-0.0301456	0.0318957	0.521714
Rpl22	-0.0137163	0.0152921	-0.117641	0.0095643	0.19753	-0.0555154	-0.00966286	0.521649
Chpf	-0.0140295	0.0407267	-0.0353373	0.0194627	-0.0131267	0.0485696	0.0644219	0.521552
Tst	-0.0282732	0.0233766	-0.0279236	0.0207177	0.0226242	-0.0292283	0.0315847	0.521491
Drosha	-0.016903	0.06911	-0.0430094	-0.0538036	-0.00390503	-0.00971018	-0.0172388	0.521404
Srf	-0.0190874	-0.00331736	0.00418392	-0.00259911	0.0164457	-0.000752975	0.0515198	0.521335
Dtnb	0.026918	-0.0129385	0.00904577	-0.0139085	0.0124336	-0.0236942	0.0456714	0.521162
Sugp1	-0.0243172	-0.0152535	0.0254564	-0.0473175	0.0388368	-0.0443028	0.100552	0.520837
Pck2	-0.0296364	0.0244949	-0.0288978	-0.0156559	-0.00376126	-0.0163725	-0.00464967	0.520467
Rab3gap1	0.00179612	-0.00743118	-0.00862218	0.0056261	-0.0116467	0.000637852	0.054796	0.5204
Xpr1	-0.028665	-0.0403151	0.002868	-0.0711377	0.0200991	0.0150769	0.0697764	0.520326
Slirp	-0.0250641	-0.00521935	0.0122558	0.0143925	0.0691566	0.0385795	0.112744	0.519823
Acsf3	-0.0105589	-0.00555015	0.00125035	-0.0220988	0.0180531	-0.0115083	0.00997391	0.519543
Smim13	0.0155222	0.0173398	-0.00575948	0.0260241	0.0283465	-0.0340271	0.0418339	0.519414
Rpl3	0.112716	-0.0238112	-0.0841511	0.0323304	0.0123758	0.0337293	0.0549485	0.519272
Bmp7	-0.105317	-0.122726	-0.110864	0.0573564	0.249939	-0.0044413	0.22024	0.519177
Hp1bp3	0.026164	-0.0361625	-0.0096961	0.00836503	0.0681316	-0.0670812	0.0792956	0.519069
Mkks	0.0142272	-0.00493265	0.00399524	-0.00188677	0.0430169	-0.0106373	0.0216754	0.518874
Plekha5	0.00691528	-0.012623	-0.00505719	0.0092602	0.00447662	-0.0056726	0.0410991	0.518873
Dand5	-0.00488996	-0.00461999	0.00265861	-0.0102593	0.0143443	-0.00366595	0.0114718	0.518802
2410004B18Rik	-0.0228265	0.0370181	-0.0497398	-0.00965487	0.0102461	0.0023274	-0.0133812	0.518678
Alg13	-0.000466013	0.00194436	-0.000693949	-0.0237709	0.0153619	-0.0116117	-0.00062882	0.517778
Dmac2	-0.00560226	0.00670135	0.00701023	-0.00740649	-0.000711314	0.00503708	0.0343496	0.517635
Lhx6	-0.0121705	-0.00223465	-0.0035311	-0.00394675	0.00736555	0.00613205	0.0140903	0.517379
Taldo1	-0.0196163	-0.00343531	0.0408899	-0.114842	0.171708	-0.0782528	0.0960837	0.517122
Sdhd	0.00511244	-0.0112651	0.0249968	-0.0332001	0.273523	-0.101314	0.143122	0.516951
St3gal4	-0.005111	0.0350344	-0.0133698	-0.0603567	9.82053e-05	-0.0156012	-0.00940287	0.516838
Pfkfb3	-0.0493302	-0.0136069	-0.0179768	-0.0069157	0.119816	-0.0297936	0.0638878	0.516828
Gpr108	0.0189259	0.000466955	-0.0130946	0.00495638	-0.00651799	0.00494564	0.0139888	0.516512
Phyh	0.0767396	-0.0215766	-0.0348105	-0.0372946	-0.0311636	-0.103825	0.0653886	0.516477
Pvt1	-0.0395927	0.00121985	0.0100849	-0.0892907	0.0128233	-0.0116087	0.0425263	0.516319
Nrtn	-0.0210886	-0.0159656	-0.00795884	0.010989	0.0400547	-0.00278515	0.0558344	0.516305
Oaz2	-0.0728181	0.00188864	-0.0282607	-0.03131	-0.0290768	-0.00628199	0.0803881	0.516244
Eapp	-0.0439424	-0.0136696	0.028699	-9.31778e-05	0.0387822	-0.0587971	0.270468	0.515886
Rhoc	0.0433708	0.0168632	-0.253258	0.14623	-0.039426	0.0849917	0.161813	0.515721
Hltf	0.0174365	1.51897e-05	-0.0218673	-0.00507945	-0.0645341	0.0384951	0.187659	0.515546
Rpl10	-0.0419407	-0.0370641	-0.0830812	0.0402916	0.0262808	0.0482023	0.0956705	0.51517
Irf2bpl	-0.119502	-0.0421339	-0.0225087	-0.0533679	0.121775	0.0429807	0.142681	0.515097
Trove2	0.0144661	-0.0135492	0.0204934	0.00825513	0.0620878	-0.0490973	0.107918	0.514179
Gjb3	-0.04136	-0.0231633	-0.100309	0.0110297	0.0724406	0.0172725	0.00204397	0.514077
Zfp316	-0.0349031	0.0115669	-0.0191343	-0.0179435	0.0126389	-0.00505067	0.00141789	0.51391
Mier1	0.0560824	0.0205198	-0.0406048	-0.026577	0.0880754	0.0166935	-0.0186036	0.513831
Mturn	-0.00944062	-0.0045954	-0.00317659	-0.00185691	0.00111637	-0.0010615	0.0158547	0.513512
Snrnp27	-0.00926243	-0.00480893	0.00144655	0.00868959	0.00407326	-0.110514	0.200874	0.513406
Wdfy2	-0.0131784	0.014824	-0.0214052	-0.0088896	-0.00749639	0.000409547	-0.00351223	0.513326
Nfrkb	-0.0152373	0.00189648	0.0115294	-0.0265343	0.0171322	-0.0218796	0.0353132	0.513152
Vps13c	-0.0512527	-0.0154286	0.019068	-0.0331231	0.0353431	-0.00153066	0.135537	0.513111
Tmem170b	0.0145333	-0.00609464	-0.00620534	0.0122072	0.00525146	-0.0169615	0.0336121	0.512848
Akap8	-0.0502179	-0.00768356	-0.0102033	0.0169552	0.0482631	0.0028789	0.101157	0.51269
Dnajc21	0.0292529	-0.00091572	-0.0278919	-0.0143732	-0.00377894	0.0110431	-0.00326286	0.512261
Acot8	0.00166703	-0.00100211	-0.016298	-0.0337822	0.00261341	-0.014242	-0.0173067	0.512252
Dis3	-0.0563936	0.0423471	-0.0676032	0.00809126	0.20539	-0.00116641	0.0320318	0.512183
Poc1a	0.0679697	0.00832714	-0.0136537	-0.00195738	0.0196911	-0.0170452	0.0182391	0.512013
Ccne2	-0.00282243	-0.0035882	0.00278098	-0.00916723	0.0466347	-0.0154388	0.0214269	0.511855
Adssl1	0.0427716	0.0126555	-0.113556	0.0305171	-0.036082	0.0282574	0.0298409	0.511825
Lsp1	0.0918594	0.0626619	-0.1743	0.171365	0.128334	-0.171085	0.124537	0.511782
Polr1b	-0.0133557	0.0116824	0.00589666	-0.00980021	0.0225127	-0.0163801	0.0215953	0.511774
Mkl1	0.0179409	0.0278367	-0.0428413	-0.00836798	0.0558814	-0.0142314	-0.021553	0.511736
Foxo3	-0.0457183	0.00563061	-0.0473884	-0.0358808	-0.00758594	0.0166883	-0.00806924	0.51092
Sdf2l1	0.0462465	0.00857738	0.000608003	-0.00691803	-0.0106844	-0.010976	0.0403528	0.510823
Emc4	-0.0100329	-0.00897385	-0.0163936	-0.114812	-0.0695808	-0.0323845	0.0428948	0.510644
Socs3	-0.211235	-0.0318798	-0.147956	0.0647398	0.397526	0.0974479	0.243263	0.510585
Atad2b	0.0084498	-0.0127723	0.0135939	-0.0154926	0.00148125	-0.0102159	0.0726186	0.510511
Atad3a	-0.0525771	0.00580327	0.00682597	-0.037107	0.0827769	-0.0496452	0.0619245	0.510453
Gm5914	-0.00579354	-0.00554975	-0.00557858	0.00238247	0.0114892	-0.0111417	0.0114426	0.510369
Srsf3	0.0305682	0.0181069	0.0426918	-0.0896374	0.0830703	-0.0235179	0.0533632	0.510119
Uhrf1	-0.0157569	0.0285709	0.0138459	-0.0612264	0.10707	-0.0333172	0.0287197	0.509964
Lgals3	-0.0137566	-0.0863288	-0.568007	0.173892	-0.136814	0.0578513	0.168898	0.50981
Calu	0.0768663	-0.0542204	0.0505773	-0.00318957	0.155466	-0.15739	0.266959	0.509514
Syt12	0.0484577	-0.00101418	-0.0241445	-0.0162506	-0.00793852	-0.00352681	0.00690046	0.509407
Josd1	0.0255682	0.00621915	-0.0176824	-0.0499944	0.0180317	0.0160304	-0.0111109	0.509323
Sparc	-0.00888627	0.156414	-0.265957	0.128361	-0.179665	0.0504255	0.259565	0.508359
Neurl3	-0.0147451	0.0158737	-0.0169617	0.0152998	-0.0186486	-0.0185003	0.0664895	0.507843
Anxa11	-0.0523606	0.0216468	-0.110131	-0.020155	0.19542	0.0488009	-0.00605968	0.507605
Pitx1	0.208149	-0.0607013	-0.0485107	-0.0586427	0.0558288	-0.0379777	0.0685974	0.50747
Pex13	-0.0558812	0.0150938	0.00772444	0.00887283	0.0416485	-0.0608828	0.147322	0.507433
Nop10	-0.0516618	0.0275747	-0.0138341	-0.0938599	0.109166	0.102146	0.0521928	0.507079
Ppp1r12c	-0.038566	-0.00336993	-0.0281047	-0.0104975	0.0637696	-0.00836437	0.012175	0.507022
Tcte2	0.00226615	0.00142475	-0.00149138	-0.00759536	0.00361154	-0.00489815	-0.00186558	0.506721
A430005L14Rik	-0.0210045	0.00489983	-0.00946234	-0.0204646	0.00886975	0.00353614	0.000844973	0.506701
Calr	0.15301	-0.085795	0.0405208	-0.056779	0.148892	-0.0975434	0.185857	0.506665
Gfm1	-0.0219134	0.00636548	0.01864	-0.0142729	0.0571764	-0.0327579	0.0652542	0.506642
Pbdc1	-0.0558634	0.0171547	0.0229041	-0.0236816	0.0846763	-0.0196574	0.096669	0.506598
Tuba1b	-0.0499103	0.0377089	-0.136609	0.0554245	0.132484	0.0296767	0.0155978	0.506597
F3	0.011445	0.000261524	-0.0219481	0.0320998	0.0155443	-0.0231876	0.0393518	0.505552
Mrps30	-0.0127529	0.00640208	0.0193122	-0.0531757	0.0519038	-0.0255583	0.0342067	0.505525
Eif5a2	-0.00852555	-0.000302397	0.00180057	-0.015393	0.00978509	-0.00789127	0.00653457	0.505406
Trim59	-0.00337158	-0.00351243	-0.0230245	-0.117597	0.00262781	-0.0675456	-0.0264342	0.504845
Fem1a	-0.010076	-0.00914016	0.00731326	-0.0106574	0.0148558	-0.00242546	0.0373993	0.504816
Ptgs2	-0.263143	0.165029	-0.533118	0.405092	-0.0781571	0.0824262	0.621641	0.504126
Ripk1	-0.0099634	0.00586821	-0.00574617	0.011768	0.00844264	0.00243159	0.023433	0.503916
Dcxr	0.0279878	-0.0106882	-0.00508536	-0.0136606	0.0563807	-0.0298338	0.0147662	0.503752
Aplf	-0.020931	-0.0054585	-0.00635573	-0.0159493	0.00590767	-0.0110229	0.00482205	0.503685
Ints3	-0.0149471	0.00580228	0.0168669	-0.0319661	-0.00554851	-0.000841963	0.0734034	0.503093
Fancf	-0.00322806	0.00947426	-0.0065757	0.00282326	0.0203664	-0.00752546	0.00285739	0.503048
Acyp2	-0.113762	0.0510564	-0.0370828	-0.0433368	-0.0315791	0.010618	0.11217	0.502914
Tspan3	-0.00854161	-0.0148331	-0.0963236	0.0508206	-0.0296212	0.0840687	0.14005	0.502808
Zgrf1	-0.00773246	0.00651232	0.00973718	-0.00414796	0.0312926	-0.0012601	0.0247101	0.502697
Cpq	-0.0334678	-0.0425934	-0.0452896	-0.0452486	0.20055	-0.0282143	0.0358639	0.502137
BC005624	-0.0322524	0.041704	-0.0219899	-0.0618868	-0.000382659	-0.00631587	-0.00860902	0.502136
Atg4a	-0.013021	-0.00287558	-0.00420571	0.00403537	0.0143411	0.0018912	0.0208879	0.50208
Memo1	-0.022757	0.000455918	-0.0202061	-0.020699	0.109755	0.0201056	0.0206313	0.501844
Zbtb1	-0.0188102	-0.0221691	-0.0102062	0.000464315	-0.0144286	0.0150497	0.124648	0.500846
Smarcd1	-0.0195207	0.00515097	-0.00980103	0.00808216	0.0103979	-0.00879722	0.022909	0.500719
Myo5a	0.0603474	0.002658	0.0247458	-0.076327	-0.010969	-0.0322878	0.0724666	0.5006
Mns1	-0.018684	0.00139119	0.00154848	-0.00714667	0.040551	-0.00817196	0.0244391	0.500186
Pcif1	-0.0363647	-0.0187837	0.014797	-0.00588431	0.0792387	-0.0689767	0.1268	0.500113
Heatr5b	-0.00837946	-0.00879776	-0.0213552	0.000457131	0.0171196	0.0149682	0.00600077	0.499904
Mtmr1	-0.0125626	-0.00464987	0.000105687	0.0016294	0.0332891	-0.0137029	0.0290383	0.499702
Ruvbl1	-0.0384473	0.0451903	-0.00993951	-0.0921631	0.0460653	-0.0489568	-0.00688127	0.499668
Gpi1	-0.115945	0.02349	-0.000622139	-0.0116691	0.0620514	-0.117794	0.194061	0.499618
Atp6v1d	-0.068458	-0.0205151	-0.0260267	-0.0176737	0.0343306	-0.00578978	0.0474203	0.499414
Zfp334	-0.00367788	0.0190863	-0.00140411	-0.00422487	-0.0121831	-0.0119952	0.0268689	0.499327
Cog6	0.00459061	-0.0119202	-0.0393601	-0.000480823	0.103638	-0.0161236	0.00584116	0.499182
Rangap1	0.0131532	0.00961915	-0.0280897	0.0447088	0.0718658	-0.0634642	0.0552429	0.499134
Neil3	-0.0126594	0.0081287	0.000314677	-0.014793	0.0308963	-0.0348269	0.0166543	0.498923
Tbc1d22a	-6.60657e-05	-0.00353014	-0.0111293	-0.0141303	0.00431126	0.00244681	-0.00800275	0.498901
1810030O07Rik	-0.0233756	-0.0146683	0.0040313	-0.0327351	0.0203606	0.0172302	0.042859	0.498663
Ing3	-0.0517132	-0.0111998	-0.00505307	0.000708479	0.0412536	-0.0237639	0.0839659	0.498604
Mt1	0.224403	-0.431267	-0.270974	-0.0406524	0.135987	-0.43418	0.305055	0.498298
Rpl11	0.0437156	-0.0237056	-0.0277632	-0.066505	0.172812	-0.0604964	0.00607121	0.498284
Fam53c	-0.00487516	0.0118986	-0.0138235	-0.0270265	-0.017793	-0.00597174	-0.00394541	0.498279
Pelp1	-0.00940612	0.00810344	-0.0139674	0.00163455	0.0208006	0.0336771	0.0179256	0.498268
Sgo2a	-0.0446168	0.0662052	-0.0456305	-0.0235804	-0.0691111	-0.0324872	0.0673726	0.497881
Traf6	-0.00377512	-0.0031667	3.52132e-05	-0.00427543	0.0195094	-0.0165279	0.0127343	0.497849
Eif3m	-0.00526596	0.0349723	0.00819207	-0.0634144	0.0169398	-0.0539565	0.0166245	0.497557
Apol6	-0.00957409	-0.0111186	0.00568986	0.00195045	0.0228561	-0.0145331	0.0527389	0.497517
Lancl2	0.00313385	-0.0020521	-0.00536281	-0.0308857	-0.0022096	-0.00624325	-0.00467015	0.497501
Serp2	-0.0114921	0.0176739	-0.011502	-0.00723641	0.0349272	-0.0134561	-0.000927131	0.496722
Arf6	-0.0956477	-0.0656366	-0.0371043	0.045085	0.0957163	-0.0496402	0.234832	0.496608
Nbas	-0.0178062	0.00451377	-0.00571512	0.0178641	0.0290055	-0.0118107	0.0410385	0.496459
Car13	0.0593272	-0.0493335	-0.0102759	-0.107427	0.144174	-0.107837	0.0257917	0.49639
Mcam	-0.017921	0.0171189	-0.010044	0.0106002	0.00870316	-0.00958952	0.0224319	0.496208
Tox4	-0.0236681	0.0171172	-0.0596128	-0.032756	0.00668051	0.0529608	-0.00614055	0.496198
Ndufb11	-0.0276021	-0.0374324	-0.0137861	-0.0429247	0.240298	-0.161615	0.109114	0.495899
Gga2	-0.0120249	-0.00465597	0.00302029	-0.00782084	0.00107624	-0.000106175	0.0351658	0.495526
Plec	0.0464759	-0.0407197	-0.0730706	-0.0562048	-0.0488548	0.0925441	0.0689527	0.495081
Arhgef28	-0.0178913	0.0211618	0.00570347	-0.0329339	0.0107118	-0.0252989	0.0166519	0.495077
Plekhm2	-0.0140561	0.00769395	-0.0230046	0.0120869	-0.0257795	-0.00869797	0.0564948	0.494972
Rhob	-0.296011	0.0031381	-0.0462135	-0.1917	0.361651	-0.0361537	0.162475	0.494771
Wrnip1	-0.00319446	0.0112383	-0.00273595	-0.0413663	0.147756	-0.0460159	0.0253391	0.494345
Galc	0.00328463	-0.000513849	-0.0388338	0.0298872	-0.0157859	-0.00180853	0.046375	0.49354
Stom	0.0325892	-0.0193582	-0.0398934	0.0189042	-0.0188432	0.0311588	0.0627835	0.493518
Ppt2	-0.0633852	0.0193527	-0.0241622	0.00217128	0.0371574	0.00905444	0.0468699	0.493237
Hspa4	-0.0517627	0.0232983	0.0113431	-0.027556	0.00411939	-0.0308878	0.0896467	0.493055
Mum1l1	-0.0127038	-0.00183326	-0.00602836	-0.0100544	0.0306533	-0.0153733	0.00603362	0.492678
Fbxo2	-0.0377926	-0.126636	0.0246618	-0.174786	0.199236	-0.135094	0.145125	0.491782
Taf1b	0.0894638	-0.00877444	-0.0436991	0.0481685	0.0644869	-0.032216	0.044907	0.49173
Ppp1r13b	-0.00623697	0.00322697	-0.0178219	-0.0227298	-0.0395437	-0.00923754	0.0254724	0.491466
[truncated: 8,454 more rows]
