# Supplementary material for: Clonal transcriptomics identifies mechanisms of chemoresistance and empowers rational design of combination therapies
Source: bioRxiv preprint, doi:10.1101/2021.12.09.471927, version 2 (2022-06-10)
Supplement: Supplementary Table 8 [file 471927_file10.xlsx]

## Sheet: Geneset_correlation
# Values are mean log2 AUCell Enrichment (clone compared to bulk tumour) across all vehicle experiments
	Clone 238	Clone 350	Clone 473	Clone 523	Clone 537	Clone 679	Clone 684	Correlation
logFC_abundance_DTX_vs_Vehicle	-3.95824	0.050305	-2.39211	-1.42665	-1.01414	1.91295	-1.60586
CHICAS_RB1_TARGETS_LOW_SERUM	-0.0408953	0.0229714	-0.0200914	0.00740205	0.0195738	0.0830527	0.00524072	0.980611
REACTOME_TRANSPORT_OF_MATURE_TRANSCRIPT_TO_CYTOPLASM	-0.0509445	0.0160576	-0.014662	-0.00283136	0.0133896	0.0691063	0.0074921	0.977854
PID_NEPHRIN_NEPH1_PATHWAY	-0.0773185	0.0256303	-0.0622757	-0.0109271	-0.000378963	0.0949938	0.0105483	0.963979
SPIELMAN_LYMPHOBLAST_EUROPEAN_VS_ASIAN_DN	-0.0220459	0.00130731	-0.0090649	-0.0122246	-0.00211059	0.023992	-0.00205706	0.949175
REACTOME_RECOGNITION_OF_DNA_DAMAGE_BY_PCNA_CONTAINING_REPLICATION_COMPLEX	-0.0341346	0.0319555	-0.0118258	0.0109459	0.0282367	0.045966	0.0136343	0.948918
BANDRES_RESPONSE_TO_CARMUSTIN_MGMT_24HR_DN	-0.0297876	0.0146644	-0.0221802	0.0142004	0.0182672	0.0740266	-0.00736464	0.943882
MALONEY_RESPONSE_TO_17AAG_DN	-0.0155349	0.0171221	0.00346111	-0.00250356	0.0160044	0.0551585	0.00729483	0.943182
ZHAN_MULTIPLE_MYELOMA_MS_DN	-0.0321347	0.0121832	-0.0177664	0.0168145	0.00167419	0.0463912	-0.0122161	0.939523
HONMA_DOCETAXEL_RESISTANCE	-0.0205822	0.0128934	-0.0110696	0.00249629	-0.00488145	0.044456	0.00984683	0.938024
REACTOME_RHO_GTPASES_ACTIVATE_FORMINS	-0.0369801	0.0299443	-0.0398888	0.00405412	0.01947	0.0521543	-0.0115267	0.937044
KEGG_INSULIN_SIGNALING_PATHWAY	-0.0597069	0.0160595	-0.0477254	0.0147727	0.0303571	0.0758782	0.00177652	0.933296
LEE_LIVER_CANCER_SURVIVAL_DN	-0.0177312	0.0135847	0.00965929	0.0159315	0.0146522	0.0500432	0.00297146	0.931574
IKEDA_MIR133_TARGETS_UP	-0.0390001	0.00127722	-0.0169592	-0.00369191	-0.0112464	0.0628161	-0.0207362	0.929042
PID_ILK_PATHWAY	-0.0562674	0.0179715	-0.0305552	0.00985823	0.0336747	0.056575	0.00811252	0.925468
CHAUHAN_RESPONSE_TO_METHOXYESTRADIOL_UP	-0.0257456	0.0148839	-0.0193815	-0.0114964	0.00902654	0.0664679	0.0143963	0.92496
REACTOME_RESPONSE_OF_EIF2AK4_GCN2_TO_AMINO_ACID_DEFICIENCY	-0.00534694	0.0016526	-0.00424129	-0.000932933	0.00343829	0.00770341	0.00149169	0.923076
ASTIER_INTEGRIN_SIGNALING	-0.0971553	-0.00851742	-0.06352	-0.0030979	0.010063	0.191732	-0.0153995	0.920767
REACTOME_HATS_ACETYLATE_HISTONES	-0.0556742	0.0148249	-0.00795716	0.0163502	-0.0169335	0.0608187	0.00347685	0.917223
REACTOME_GLYCOGEN_METABOLISM	-0.0585126	-0.0124457	-0.0356481	-0.00302694	0.0157553	0.0746173	-0.00935285	0.915207
SETLUR_PROSTATE_CANCER_TMPRSS2_ERG_FUSION_UP	-0.0984644	0.0259462	-0.110551	-0.0668406	0.0321749	0.179098	4.74563e-05	0.914126
RHODES_UNDIFFERENTIATED_CANCER	0.00938309	0.0666796	0.0126604	0.0315954	0.0500833	0.11315	0.00475321	0.914024
REACTOME_SIGNALING_BY_THE_B_CELL_RECEPTOR_BCR	-0.0640022	0.00207782	-0.000652072	0.022387	0.0196902	0.08385	-0.00161912	0.90727
WP_RENIN_ANGIOTENSIN_ALDOSTERONE_SYSTEM_RAAS	-0.0549774	-0.000984428	-0.0627338	-0.00814476	0.0161266	0.073508	-0.0012349	0.907113
BARIS_THYROID_CANCER_UP	-0.0734496	0.00294724	-0.0370341	-0.0435341	0.0212881	0.117227	0.0133578	0.906788
REACTOME_FC_EPSILON_RECEPTOR_FCERI_SIGNALING	-0.0615506	0.00351806	-0.00177387	0.00849926	0.0155389	0.0587533	0.0100881	0.906788
BILANGES_SERUM_AND_RAPAMYCIN_SENSITIVE_GENES	-0.0101799	-0.0020724	-0.00314801	-0.00233388	-0.00209716	0.0146999	-0.00446905	0.90646
WONG_MITOCHONDRIA_GENE_MODULE	-0.0550937	0.014602	-0.0377351	0.0363772	-0.00943871	0.102718	0.00732817	0.905643
LI_CISPLATIN_RESISTANCE_UP	-0.541864	-0.0926326	-0.221467	-0.0773985	0.135752	0.481881	-0.322451	0.904421
REACTOME_GPVI_MEDIATED_ACTIVATION_CASCADE	-0.0378745	8.79638e-05	-0.0281646	-0.0216791	-0.00189275	0.0879794	-0.00482595	0.903102
REACTOME_NEDDYLATION	-0.0467992	0.00415953	-0.0095178	0.0250746	0.0245434	0.129274	0.00203244	0.902409
REACTOME_DEUBIQUITINATION	-0.0521249	0.0013911	0.000988763	0.01644	0.012606	0.0836548	0.0132138	0.902306
REACTOME_REGULATION_OF_EXPRESSION_OF_SLITS_AND_ROBOS	-0.0181881	0.000557578	0.000585005	0.00559776	0.00997466	0.0396196	0.00376246	0.899818
REACTOME_TRANSCRIPTIONAL_REGULATION_BY_RUNX2	-0.0531904	0.00105855	-0.000696176	0.0134317	0.0270203	0.0736221	0.0102306	0.898615
KAAB_FAILED_HEART_ATRIUM_DN	-0.0414089	0.00838459	-0.0352712	0.00673392	0.0183116	0.0459226	0.0132406	0.898608
REACTOME_UCH_PROTEINASES	-0.049322	0.00228137	-0.0120877	0.0253754	0.0381194	0.126843	0.00882994	0.89791
REACTOME_BBSOME_MEDIATED_CARGO_TARGETING_TO_CILIUM	-0.0254337	0.00853479	-0.0148602	0.00103223	-0.013344	0.0684782	0.00416694	0.897898
PID_IL8_CXCR2_PATHWAY	-0.0646025	0.0227754	-0.0140917	-0.045125	-0.00356035	0.0401615	-0.00743087	0.89734
REACTOME_DOWNSTREAM_SIGNALING_EVENTS_OF_B_CELL_RECEPTOR_BCR	-0.0588064	0.000702106	-0.00793858	0.0290615	0.0245327	0.0820052	-0.000562346	0.896572
DANG_MYC_TARGETS_UP	-0.00880344	0.0125991	-0.00964185	0.00234152	0.0119255	0.071374	0.00640974	0.893792
REACTOME_INTERLEUKIN_1_FAMILY_SIGNALING	-0.0598817	0.00162969	-0.0162721	0.0140066	0.0355522	0.0671801	0.0107184	0.892576
REACTOME_PTEN_REGULATION	-0.0865446	-0.00132192	0.00255072	0.0197657	0.0289055	0.0963741	0.000989181	0.892516
REACTOME_NEGATIVE_REGULATION_OF_NOTCH4_SIGNALING	-0.0523541	-2.01149e-05	-0.000636091	0.0208232	0.035779	0.112561	0.0171549	0.888527
REACTOME_SIGNALING_BY_HEDGEHOG	-0.0616924	-0.00155472	0.000100497	0.0276309	0.0150578	0.092161	0.008138	0.887347
REACTOME_SIGNALING_BY_ROBO_RECEPTORS	-0.0128352	0.00118074	0.00284821	0.00113351	0.00449141	0.0336502	0.00252865	0.886631
NUTT_GBM_VS_AO_GLIOMA_DN	-0.014303	-0.00180333	-0.0147165	-0.00730976	-0.00183386	0.0317853	0.000773048	0.885878
REACTOME_SIGNALING_BY_NOTCH4	-0.062936	-0.00018335	0.00366844	0.0138218	0.0402762	0.0967814	0.00996357	0.885419
TIEN_INTESTINE_PROBIOTICS_2HR_UP	-0.0100359	0.00151582	-0.0091743	0.00675914	0.00771413	0.0190681	-0.000196374	0.884929
REACTOME_FCERI_MEDIATED_NF_KB_ACTIVATION	-0.0651461	-0.00663211	0.00059655	0.00913086	0.0190198	0.0827358	0.00856653	0.884588
REACTOME_APC_C_MEDIATED_DEGRADATION_OF_CELL_CYCLE_PROTEINS	-0.0563826	-0.00466635	-0.000824949	0.0218239	0.0191337	0.116843	0.00774701	0.884325
REACTOME_REGULATION_OF_RUNX2_EXPRESSION_AND_ACTIVITY	-0.0660957	0.00222296	0.00977497	0.0276579	0.0364113	0.106051	0.00703341	0.884002
REACTOME_DEGRADATION_OF_GLI1_BY_THE_PROTEASOME	-0.0685437	-0.00128977	0.00704437	0.0221728	0.0327931	0.106978	0.0122017	0.883737
MORI_SMALL_PRE_BII_LYMPHOCYTE_DN	-0.0504584	0.00631914	-0.0511773	0.00647804	-0.0212284	0.15176	-0.00118399	0.883446
WP_PROTEASOME_DEGRADATION	-0.0531776	-0.00603277	0.000446734	0.00378252	0.0235134	0.111578	-0.00835432	0.882349
MIKKELSEN_NPC_ICP_WITH_H3K4ME3	-0.069105	0.00235301	-0.0506167	0.0387813	0.00746619	0.0742686	-0.0206206	0.881546
KOBAYASHI_EGFR_SIGNALING_24HR_DN	0.00481605	0.0471775	-0.013188	0.0390141	0.0167359	0.115223	0.0319628	0.880751
REACTOME_INTEGRATION_OF_ENERGY_METABOLISM	-0.0187628	0.00757561	-0.0149992	-0.0141619	0.0150427	0.0302419	0.00420037	0.880424
CHEOK_RESPONSE_TO_MERCAPTOPURINE_AND_HD_MTX_DN	-0.186556	0.105066	-0.231515	-0.0603261	-0.127706	0.595313	-0.186086	0.880064
BROWNE_HCMV_INFECTION_14HR_UP	-0.0695328	0.00298093	-0.00104088	0.0113267	0.0123898	0.0426567	-0.00751111	0.876985
GINESTIER_BREAST_CANCER_ZNF217_AMPLIFIED_UP	-0.07593	-0.00514971	-0.0965588	0.0294925	-0.00105151	0.121765	-0.0203384	0.876651
WP_ESTROGEN_SIGNALING_PATHWAY	-0.0590187	0.00127619	-0.0695981	0.0315734	0.0134374	0.0988755	-0.00122812	0.876495
REACTOME_TCF_DEPENDENT_SIGNALING_IN_RESPONSE_TO_WNT	-0.0422725	0.000629104	0.000512888	0.0172179	0.0223299	0.0527744	0.00673936	0.876089
CREIGHTON_AKT1_SIGNALING_VIA_MTOR_DN	-0.046992	0.00431561	-0.00601542	0.0104474	0.0234653	0.0571926	-0.0308647	0.875157
REACTOME_CYTOPROTECTION_BY_HMOX1	-0.0325235	-0.00064684	0.00465801	0.0173671	0.015722	0.075615	-0.00106597	0.875068
ZHAN_MULTIPLE_MYELOMA_CD2_DN	-0.0631104	-0.00874649	-0.0373241	-0.0274892	0.021564	0.140777	0.0224326	0.874717
REACTOME_CARGO_RECOGNITION_FOR_CLATHRIN_MEDIATED_ENDOCYTOSIS	-0.0351464	-0.0118827	-0.0210402	-0.00685664	0.00408953	0.0476514	0.00643119	0.873479
DANG_BOUND_BY_MYC	-0.0141594	3.51335e-05	-0.00634943	0.00799777	0.00195478	0.0481078	-0.00342107	0.873042
REACTOME_METABOLISM_OF_POLYAMINES	-0.0732457	-0.00802358	0.00600972	0.0246193	0.0229542	0.116693	0.0107573	0.871256
PID_ATR_PATHWAY	-0.0528923	0.0347543	-0.0301995	-0.0452363	0.0565968	0.19782	-0.0495786	0.871138
REACTOME_CYCLIN_A_CDK2_ASSOCIATED_EVENTS_AT_S_PHASE_ENTRY	-0.0388306	0.000893689	0.00548039	0.0255845	0.0201472	0.121775	0.00284286	0.86986
KEGG_AMINO_SUGAR_AND_NUCLEOTIDE_SUGAR_METABOLISM	-0.124827	0.0139385	-0.136617	0.0386874	0.0659251	0.298985	-0.134793	0.868919
REACTOME_SCF_SKP2_MEDIATED_DEGRADATION_OF_P27_P21	-0.0556217	-0.00163021	0.0145922	0.0245556	0.0313653	0.115982	0.00725146	0.867238
REACTOME_INTERLEUKIN_1_SIGNALING	-0.0614539	-0.00487393	-0.0173252	0.0238003	0.0352795	0.073816	0.010739	0.86619
REACTOME_REGULATION_OF_TP53_ACTIVITY_THROUGH_ACETYLATION	-0.135124	0.0153147	0.0278135	-0.0347287	0.0031855	0.134079	0.025919	0.865793
REACTOME_CTLA4_INHIBITORY_SIGNALING	-0.0557247	0.0336235	-0.0156615	-0.0454908	-0.0230825	0.153191	-0.0561539	0.865716
REACTOME_MAPK6_MAPK4_SIGNALING	-0.0595935	-0.0073573	0.00942445	0.0145082	0.0247632	0.098633	0.00203502	0.865316
REACTOME_CLEC7A_DECTIN_1_SIGNALING	-0.0683856	-0.0062394	0.00601747	0.00878671	0.018742	0.0739156	0.0100163	0.865186
MODY_HIPPOCAMPUS_POSTNATAL	-0.0296092	-0.0120474	-0.0372864	-0.00808615	0.00119506	0.0477611	-0.00482631	0.865025
REACTOME_APC_C_CDH1_MEDIATED_DEGRADATION_OF_CDC20_AND_OTHER_APC_C_CDH1_TARGETED_PROTEINS_IN_LATE_MITOSIS_EARLY_G1	-0.0550674	-0.0049787	0.01036	0.0236421	0.0213999	0.108656	0.00703716	0.864145
REACTOME_DNA_DAMAGE_RECOGNITION_IN_GG_NER	-0.0724521	0.0107225	-0.00315629	0.000579754	-0.0242467	0.0556038	0.0178242	0.863547
REACTOME_REGULATION_OF_HMOX1_EXPRESSION_AND_ACTIVITY	-0.0616961	0.00125282	0.0210702	0.0283003	0.0245436	0.110423	-0.000486196	0.862524
REACTOME_REGULATION_OF_PTEN_STABILITY_AND_ACTIVITY	-0.0653226	0.00178653	0.0210079	0.0326717	0.0308767	0.114176	0.00066398	0.86242
REACTOME_DEGRADATION_OF_DVL	-0.0592666	-0.0038377	0.00874033	0.0221567	0.0422047	0.107206	0.0116893	0.862335
REACTOME_ORC1_REMOVAL_FROM_CHROMATIN	-0.0634556	-0.00509509	0.0140226	0.0274084	0.0365883	0.135982	0.00682354	0.862307
BIOCARTA_RACCYCD_PATHWAY	-0.0633819	0.0297881	-0.0724058	0.0043121	0.0149734	0.0634703	0.0319871	0.861323
REACTOME_REGULATION_OF_RUNX3_EXPRESSION_AND_ACTIVITY	-0.056413	-0.00232043	0.0110156	0.0187207	0.0519817	0.125012	0.012748	0.860418
REACTOME_HEDGEHOG_ON_STATE	-0.0598552	-0.00684621	0.00864531	0.017761	0.0273412	0.0969002	0.0133689	0.859896
SCHLOSSER_MYC_TARGETS_AND_SERUM_RESPONSE_UP	-0.0210077	0.0258001	-0.010135	0.0370755	0.0415299	0.0529406	0.0105283	0.85958
REACTOME_THE_ROLE_OF_GTSE1_IN_G2_M_PROGRESSION_AFTER_G2_CHECKPOINT	-0.0580028	-0.00767825	0.00418458	0.0182227	0.00691681	0.102894	0.017857	0.859497
REACTOME_HEDGEHOG_OFF_STATE	-0.0621751	-0.00179506	-0.00230389	0.0315973	0.0205591	0.0782263	0.019998	0.858722
BIOCARTA_PTDINS_PATHWAY	-0.0340878	0.00671517	-0.0680258	-0.00652145	0.0101483	0.0613779	-0.00730962	0.857636
WANG_CISPLATIN_RESPONSE_AND_XPC_DN	-0.0432521	-0.0100349	-0.0259578	0.0230747	0.00891588	0.0729907	-0.0226317	0.857416
KEGG_PROTEASOME	-0.0406834	0.000584952	0.0147266	0.0246674	0.0381085	0.127772	0.00661483	0.857409
REACTOME_S_PHASE	-0.0415559	0.00182416	0.0197048	0.0217151	0.0316396	0.10477	0.00632879	0.856763
REACTOME_DNA_REPLICATION_PRE_INITIATION	-0.0586786	-0.00563315	0.0130892	0.0311982	0.0251704	0.146168	0.00483389	0.856488
WP_CELL_MIGRATION_AND_INVASION_THROUGH_P75NTR	-0.0360038	0.0119638	-0.0671041	0.0385771	0.027586	0.135548	-0.0162306	0.855377
REACTOME_PKMTS_METHYLATE_HISTONE_LYSINES	-0.101983	0.00258926	0.0145038	0.0571915	0.0257739	0.13259	-0.0223037	0.854706
PID_VEGFR1_PATHWAY	-0.105257	0.0365958	-0.0749059	0.0536317	0.0309171	0.0748236	-0.0557713	0.854321
KEGG_STARCH_AND_SUCROSE_METABOLISM	-0.177866	0.0473929	-0.163752	0.073096	0.134594	0.212102	-0.115884	0.85385
REACTOME_SWITCHING_OF_ORIGINS_TO_A_POST_REPLICATIVE_STATE	-0.0572611	-0.00480443	0.0160706	0.0284382	0.0220294	0.122589	0.0118169	0.853013
BLALOCK_ALZHEIMERS_DISEASE_DN	-0.00766941	0.00705797	-0.0168722	-0.0111417	0.00906283	0.0482043	-0.0016777	0.852303
REACTOME_ABC_TRANSPORTER_DISORDERS	-0.0507903	-0.00807285	0.00895602	0.018826	0.0304338	0.119787	0.0132327	0.852208
PID_PLK1_PATHWAY	-0.0489512	0.0304694	0.0018742	-0.0234599	0.02136	0.057412	-0.0434075	0.85189
REACTOME_DECTIN_1_MEDIATED_NONCANONICAL_NF_KB_SIGNALING	-0.0637042	-0.00558323	0.0122981	0.0305686	0.0435501	0.117367	0.00937779	0.851728
REACTOME_DEFECTIVE_CFTR_CAUSES_CYSTIC_FIBROSIS	-0.0501489	-0.00770434	0.00943704	0.0194674	0.0308923	0.120428	0.0137137	0.85158
MATTIOLI_MULTIPLE_MYELOMA_WITH_14Q32_TRANSLOCATIONS	-0.0845689	0.00815114	-0.0640746	0.0762122	0.0524669	0.170288	-0.0553099	0.850469
SHIPP_DLBCL_VS_FOLLICULAR_LYMPHOMA_UP	-0.0102834	0.00957772	-0.0263028	0.0158286	0.0096986	0.0460815	-0.00195234	0.849436
REACTOME_C_TYPE_LECTIN_RECEPTORS_CLRS	-0.0694339	-0.00296166	0.00172665	0.0030413	0.0173047	0.0501632	0.0121022	0.849408
REACTOME_DNA_REPLICATION	-0.0484798	-0.000827189	0.0223679	0.0151632	0.0137371	0.125049	0.0052435	0.848492
HU_ANGIOGENESIS_DN	-0.0393287	0.0313882	-0.0501285	0.057491	0.0280354	0.0857397	-0.00782665	0.848396
WP_TRANSCRIPTION_FACTOR_REGULATION_IN_ADIPOGENESIS	-0.283339	0.0161805	-0.271318	0.187858	0.0970175	0.354066	0.0476581	0.847661
REACTOME_ASSEMBLY_OF_THE_PRE_REPLICATIVE_COMPLEX	-0.0559369	-0.00539619	0.0171182	0.0334061	0.0308828	0.141044	0.00121213	0.846864
REACTOME_PERK_REGULATES_GENE_EXPRESSION	-0.0417879	-0.0180753	-0.0316496	-0.00607724	0.0136245	0.083128	0.0105022	0.845379
MAYBURD_RESPONSE_TO_L663536_DN	-0.0197058	0.00614894	-0.00612704	0.00691523	0.0244222	0.0948639	-0.024282	0.845376
REACTOME_SIGNALING_BY_NOTCH	-0.0334676	-0.00795017	0.00102531	0.0173353	0.0148224	0.0830304	0.00717759	0.845372
REACTOME_HEDGEHOG_LIGAND_BIOGENESIS	-0.0482495	-0.00789872	0.00891911	0.0287019	0.0212595	0.126852	0.00140132	0.845103
VALK_AML_CLUSTER_3	-0.101191	0.0361487	-0.194353	-0.0509925	-0.0567738	0.263447	0.0445439	0.844632
REACTOME_REGULATION_OF_MRNA_STABILITY_BY_PROTEINS_THAT_BIND_AU_RICH_ELEMENTS	-0.0649774	-0.00570778	0.0162479	0.0326188	0.0236152	0.103937	0.00370804	0.844114
NAKAMURA_METASTASIS	-0.163884	-0.0205956	0.00637889	0.0291693	0.00822837	0.126396	-0.0643259	0.843505
KEGG_COLORECTAL_CANCER	-0.0683636	0.0171422	-0.0185163	0.00881273	0.032165	0.0318845	0.0101007	0.843245
REACTOME_CELLULAR_RESPONSE_TO_HYPOXIA	-0.0376746	-0.00937824	-0.00724869	0.0244338	0.0123592	0.108281	-0.0116981	0.842274
YAGI_AML_SURVIVAL	-0.02144	0.0122123	-0.0363842	0.0360284	0.00788735	0.0726828	0.00310295	0.840611
REACTOME_HIV_INFECTION	-0.0387538	0.00744582	0.0194456	0.0322264	0.0152418	0.0686641	0.0054031	0.840421
REACTOME_UB_SPECIFIC_PROCESSING_PROTEASES	-0.0452874	-0.00386628	0.0168851	0.0240185	0.017351	0.0924371	0.00695391	0.839752
WP_INSULIN_SIGNALING	-0.0716817	-0.0034118	-0.0446348	-0.0484045	0.0100893	0.0423915	0.0159694	0.839382
REACTOME_FORMATION_OF_FIBRIN_CLOT_CLOTTING_CASCADE	-0.13847	0.0528768	0.00976329	0.1584	0.107692	0.26237	-0.0674103	0.839139
GALLUZZI_PERMEABILIZE_MITOCHONDRIA	-0.113997	0.0298852	-0.11315	0.0905088	0.0795151	0.146363	-0.0276442	0.839077
REACTOME_CROSS_PRESENTATION_OF_SOLUBLE_EXOGENOUS_ANTIGENS_ENDOSOMES	-0.0456373	-0.00340636	0.0201828	0.0235565	0.045111	0.135011	0.00895868	0.83898
REACTOME_HOST_INTERACTIONS_OF_HIV_FACTORS	-0.0444297	0.00180237	0.0157411	0.0356761	0.0159653	0.082302	0.00421533	0.83854
REACTOME_TRANSCRIPTIONAL_REGULATION_BY_RUNX3	-0.040261	-0.0029377	0.00376035	0.00736406	0.0358484	0.0619951	0.0109082	0.838301
REACTOME_TNFR2_NON_CANONICAL_NF_KB_PATHWAY	-0.0598647	-0.00465659	0.0189567	0.0407268	0.03956	0.125261	0.0141409	0.837879
REACTOME_ABC_FAMILY_PROTEINS_MEDIATED_TRANSPORT	-0.0455466	-0.0100111	0.011974	0.010948	0.0229639	0.125341	0.00564517	0.83762
REACTOME_DISORDERS_OF_TRANSMEMBRANE_TRANSPORTERS	-0.0417709	-0.0079378	0.00839751	0.022809	0.00998679	0.0943167	0.00474781	0.837396
KIM_MYCN_AMPLIFICATION_TARGETS_UP	-0.0972296	-0.0507575	-0.0950173	0.0235993	0.0129866	0.206192	-0.0161357	0.836997
REACTOME_RNA_POLYMERASE_II_TRANSCRIPTION_TERMINATION	-0.0200767	0.0107319	0.0019444	0.0104609	0.0478298	0.131845	-0.0189435	0.836806
REACTOME_INTRACELLULAR_SIGNALING_BY_SECOND_MESSENGERS	-0.0567152	-0.0070588	-0.0171006	0.0357971	0.0403943	0.0817556	0.00991123	0.836643
REACTOME_BETA_CATENIN_INDEPENDENT_WNT_SIGNALING	-0.0416248	-0.000322883	0.00896069	0.00282584	0.0412532	0.0672035	-1.48742e-05	0.835235
REACTOME_STABILIZATION_OF_P53	-0.063639	-0.0100746	0.0179567	0.0222497	0.044198	0.123088	0.00905802	0.835072
WP_NONALCOHOLIC_FATTY_LIVER_DISEASE	-0.0274774	0.0115423	-0.0447538	0.0394497	-0.00773549	0.101786	-0.011858	0.834802
WP_PHYSIOLOGICAL_AND_PATHOLOGICAL_HYPERTROPHY_OF_THE_HEART	-0.0533255	0.000222253	-0.0358204	0.029192	0.0223991	0.0444304	-0.000804193	0.834236
REACTOME_RAF_ACTIVATION	-0.015736	0.00784726	-0.0402595	0.00104894	0.0351371	0.078523	0.00455162	0.832486
REACTOME_SELECTIVE_AUTOPHAGY	-0.0435286	0.00851473	0.00349881	0.00433318	-0.00826919	0.0211775	0.00282977	0.8323
APPIERTO_RESPONSE_TO_FENRETINIDE_DN	-0.0167311	0.011079	-0.0307169	0.0356684	0.0255694	0.102504	-0.0185702	0.832119
WHITEHURST_PACLITAXEL_SENSITIVITY	-0.0768999	-0.0123686	-0.000375384	-0.0303535	-0.0341498	0.182272	-0.00176166	0.831861
REACTOME_CELLULAR_RESPONSE_TO_STARVATION	-0.00635196	0.00038001	-0.00819575	0.00109677	0.00291802	0.0104173	0.00449039	0.831129
REACTOME_ASYMMETRIC_LOCALIZATION_OF_PCP_PROTEINS	-0.055695	-0.00962403	0.0169699	0.0203481	0.0448864	0.120832	0.00636898	0.83096
REACTOME_TCR_SIGNALING	-0.0549353	0.000845686	0.00315699	0.0140642	0.0228992	0.0433711	0.0123814	0.830731
REACTOME_DEGRADATION_OF_AXIN	-0.0543654	-0.00655371	0.0185994	0.0277394	0.0439865	0.113535	0.00845819	0.830713
LANDIS_BREAST_CANCER_PROGRESSION_DN	-0.0695021	0.027604	-0.0794478	0.0211096	0.0346614	0.0504796	0.00544099	0.830023
NGUYEN_NOTCH1_TARGETS_UP	-0.0882222	0.0246748	-0.0872124	-0.00502601	0.00883855	0.0468561	0.0322001	0.829079
PID_TELOMERASE_PATHWAY	-0.0653267	0.0050299	-0.0224622	0.0217509	0.0303484	0.0505133	0.0278564	0.828865
REACTOME_G1_S_DNA_DAMAGE_CHECKPOINTS	-0.0558016	-0.0136254	0.0147114	0.0260242	0.0280228	0.130835	0.00641705	0.828672
REACTOME_NONSENSE_MEDIATED_DECAY_NMD	-0.00313566	0.000862159	0.00179141	-0.0010224	-0.000517535	0.0102508	-0.00111207	0.828649
JIANG_AGING_HYPOTHALAMUS_UP	-0.014541	0.00306338	-0.0142949	0.0283553	0.0130498	0.083999	-0.00979326	0.828391
KYNG_DNA_DAMAGE_DN	-0.0221578	-0.00127731	-0.0284187	0.0164067	0.0165457	0.0449199	-0.013713	0.828372
CONCANNON_APOPTOSIS_BY_EPOXOMICIN_DN	-0.0060196	0.0263707	-0.0291871	0.00471151	-0.0144225	0.108524	-0.00496626	0.827991
GRAHAM_CML_QUIESCENT_VS_NORMAL_QUIESCENT_UP	-0.00577643	0.0777271	-0.0378246	0.0259962	0.00153205	0.104854	-0.0270656	0.827253
WP_NEURAL_CREST_CELL_MIGRATION_IN_CANCER	-0.0610664	0.017311	-0.0569736	0.0415437	0.0208626	0.049314	-0.0127862	0.827233
REACTOME_AUF1_HNRNP_D0_BINDS_AND_DESTABILIZES_MRNA	-0.0387918	-0.00648124	0.012906	0.0302569	0.0237941	0.107681	0.0131583	0.827128
MOOTHA_VOXPHOS	-0.026227	0.00361101	-0.0385383	0.00983547	-0.0242304	0.118127	0.00939547	0.824382
OUELLET_OVARIAN_CANCER_INVASIVE_VS_LMP_UP	-0.00712083	0.0143328	-0.00945462	0.0108166	0.0349227	0.0563655	-0.0123139	0.824361
LIANG_HEMATOPOIESIS_STEM_CELL_NUMBER_LARGE_VS_TINY_UP	-0.00923887	0.0186483	-0.00579943	0.013142	0.0450204	0.0468435	0.00664232	0.824142
LASTOWSKA_COAMPLIFIED_WITH_MYCN	-0.0242742	0.0146613	-0.0468769	-0.00580408	0.0568005	0.200327	-0.0482123	0.823165
BIOCARTA_HDAC_PATHWAY	-0.0424857	0.0380726	-0.0701025	-0.0540858	0.0127884	0.0622708	0.00558821	0.823121
REACTOME_REGULATION_OF_RAS_BY_GAPS	-0.0365102	-0.00219331	0.0196405	0.0308013	0.034255	0.0976681	0.00870657	0.822046
WP_NEURAL_CREST_CELL_MIGRATION_DURING_DEVELOPMENT	-0.0606018	0.0140342	-0.0566251	0.0420084	0.0208626	0.0497787	-0.0149968	0.821974
GENTILE_UV_RESPONSE_CLUSTER_D8	-0.120123	0.00275564	-0.0910348	0.101875	-0.0145336	0.144399	0.00386067	0.82145
WP_ELECTRON_TRANSPORT_CHAIN_OXPHOS_SYSTEM_IN_MITOCHONDRIA	-0.0212919	0.00612004	-0.0443422	0.00807301	-0.0190364	0.0500523	-0.00477476	0.821311
REACTOME_PROCESSING_OF_DNA_DOUBLE_STRAND_BREAK_ENDS	-0.0572267	0.0134343	0.0445553	0.00786987	0.00411245	0.107948	-0.000668029	0.821039
REACTOME_TRANSCRIPTIONAL_REGULATION_BY_TP53	-0.0219313	0.0040123	-0.00534307	0.0117408	0.0106217	0.0177166	0.00975124	0.821017
HOFFMANN_IMMATURE_TO_MATURE_B_LYMPHOCYTE_DN	-0.0949969	-0.0106482	-0.031398	0.0484994	0.00366337	0.0649672	-0.00463081	0.820752
WP_SLEEP_REGULATION	-0.0548346	0.00449726	-0.0588715	0.00604149	0.00684187	0.0748683	0.045056	0.820233
RUIZ_TNC_TARGETS_DN	-0.000942643	0.0768599	-0.0452426	0.0129337	0.0036136	0.165023	0.07616	0.818305
KAMMINGA_EZH2_TARGETS	0.0356771	0.125635	0.0858898	0.124602	0.0811835	0.402279	-0.00710778	0.81631
NIKOLSKY_BREAST_CANCER_20Q11_AMPLICON	-0.13487	0.0675467	-0.0508216	-0.00197845	0.0602539	0.0385992	0.00768495	0.815985
RHEIN_ALL_GLUCOCORTICOID_THERAPY_DN	-0.0162527	0.0146083	-0.0196976	0.0397865	0.0304097	0.05636	0.00292575	0.814372
REACTOME_ACTIVATION_OF_THE_MRNA_UPON_BINDING_OF_THE_CAP_BINDING_COMPLEX_AND_EIFS_AND_SUBSEQUENT_BINDING_TO_43S	-0.00813987	0.005125	-0.00143834	-0.00127307	-0.0109917	0.0275477	-0.00554692	0.81437
KEGG_HUNTINGTONS_DISEASE	-0.0122489	-0.000772124	-0.0173648	0.00217262	-0.0091718	0.0691627	0.00471047	0.814061
LEE_LIVER_CANCER_E2F1_DN	-0.0641105	0.0231847	-0.12021	0.076625	0.0714897	0.187151	-0.0602835	0.812887
REACTOME_SIGNALING_BY_WNT	-0.0319953	-0.00426857	-0.00416032	0.00780551	0.0153364	0.0358293	0.0177386	0.811846
MOOTHA_MITOCHONDRIA	-0.0172094	0.00777589	-0.0277182	0.0289712	-0.0148743	0.133663	0.00118291	0.81158
WP_PATHWAYS_IN_CLEAR_CELL_RENAL_CELL_CARCINOMA	-0.0516741	-0.00472164	-0.0706312	0.0532307	0.0629321	0.164748	-0.0436606	0.811357
KIM_ALL_DISORDERS_DURATION_CORR_DN	-0.0274056	0.00515243	0.0104525	-0.0107083	-0.0134644	0.0364804	-0.00804969	0.8109
MARTORIATI_MDM4_TARGETS_NEUROEPITHELIUM_DN	-0.0679486	0.0125569	-0.0785834	0.0786714	-0.0120111	0.117976	-0.00424423	0.810767
SHEPARD_CRASH_AND_BURN_MUTANT_UP	-0.0611062	-0.0118856	-0.0307143	-0.00439486	0.000552195	0.0316456	0.0211117	0.810547
REACTOME_PCP_CE_PATHWAY	-0.0392151	-0.00817593	0.0211335	0.00690021	0.0313855	0.105548	0.00881477	0.810422
REACTOME_RUNX1_REGULATES_TRANSCRIPTION_OF_GENES_INVOLVED_IN_DIFFERENTIATION_OF_HSCS	-0.0481676	-0.00676416	0.0276219	0.0261029	0.034419	0.1148	-0.000121124	0.809662
REACTOME_RESPONSE_OF_MTB_TO_PHAGOCYTOSIS	-0.0557411	0.00997256	0.0115839	0.0124639	0.03245	0.0434429	-0.0196117	0.809067
HU_GENOTOXIN_ACTION_DIRECT_VS_INDIRECT_4HR	-0.0892854	0.0289703	-0.0127028	0.00889208	0.0255189	0.0209396	-0.00660344	0.8083
MARTIN_INTERACT_WITH_HDAC	-0.144663	-0.0200962	-0.0153588	0.0526517	-0.0155476	0.0900955	-0.00112396	0.808234
REACTOME_RNA_POLYMERASE_I_TRANSCRIPTION_TERMINATION	-0.12159	0.0427881	-0.00424034	-0.0152683	0.0456251	0.0519335	0.0367526	0.80773
GROSS_HYPOXIA_VIA_HIF1A_UP	0.000364443	0.026108	-0.000243492	-0.00134235	0.0446846	0.116282	-0.0194227	0.807723
FARMER_BREAST_CANCER_BASAL_VS_LULMINAL	-0.0425008	-0.024387	-0.0144636	-0.00699102	0.0118802	0.0471116	-0.00324843	0.80755
WP_CYTOPLASMIC_RIBOSOMAL_PROTEINS	-0.00322324	0.000884637	-0.00164983	-0.00482953	-0.00112504	0.00494045	3.85032e-05	0.80733
REACTOME_TRANSCRIPTIONAL_REGULATION_BY_RUNX1	-0.0528605	-0.0107367	0.00493982	0.0387145	0.0405182	0.0948319	-0.00786023	0.806316
REACTOME_DEGRADATION_OF_BETA_CATENIN_BY_THE_DESTRUCTION_COMPLEX	-0.0429747	-0.00993308	0.0168964	0.00946557	0.0286141	0.0803151	0.00671935	0.806301
REACTOME_CELLULAR_RESPONSES_TO_EXTERNAL_STIMULI	-0.0139047	-0.00533936	-0.00703375	0.0088629	0.00634371	0.0215774	0.00184793	0.806209
HATADA_METHYLATED_IN_LUNG_CANCER_UP	-0.0432758	2.16959e-05	0.0162311	-0.0150345	-0.0123407	0.0822548	-0.0312103	0.8061
KEGG_GLUTATHIONE_METABOLISM	-0.0970631	-0.0290026	0.0177272	-0.0406793	-0.0210059	0.169167	0.00156014	0.805414
REACTOME_CELL_CYCLE_MITOTIC	-0.00165034	0.0114946	0.0162143	0.0167238	0.00465117	0.0622322	0.0112601	0.805265
KEGG_BETA_ALANINE_METABOLISM	-0.0666005	0.0363046	-0.0309417	-0.113423	0.0134325	0.124741	-0.0581524	0.805026
WP_VITAMIN_D_IN_INFLAMMATORY_DISEASES	-0.298845	-0.0179924	-0.24722	0.0928519	0.0815602	0.164006	0.0356835	0.804883
REACTOME_CELL_CYCLE	-0.00114591	0.017472	0.029887	0.027458	0.0220909	0.0604408	0.0111176	0.804397
BASSO_B_LYMPHOCYTE_NETWORK	-0.016049	-0.00469926	-0.0214893	-0.00717125	-0.00489909	0.0622055	0.0139213	0.804294
ACEVEDO_LIVER_CANCER_WITH_H3K27ME3_DN	-0.0650454	-0.0108923	-0.0545341	0.0404922	-0.0431819	0.0944083	-0.00226681	0.803038
WP_TCELL_ANTIGEN_RECEPTOR_TCR_SIGNALING_PATHWAY	-0.103232	0.00973005	-0.0897648	0.0196161	0.0257475	0.0601418	0.0412938	0.802071
GUO_HEX_TARGETS_DN	-0.00755462	0.0168461	-0.054082	-0.0124137	-0.00148169	0.192593	-0.0150119	0.802003
PID_PDGFRA_PATHWAY	-0.0627404	0.00584233	-0.0152569	0.0523081	0.00172864	0.0544559	-0.00929759	0.799839
YANG_BREAST_CANCER_ESR1_LASER_DN	-0.0748798	-0.00850949	-0.0410939	-0.0627439	0.0444259	0.0791056	0.017235	0.799774
WIERENGA_PML_INTERACTOME	-0.000321188	0.0115054	-0.0207757	-0.00880891	0.0209724	0.102448	-0.0115893	0.798213
KEGG_GALACTOSE_METABOLISM	-0.156504	-0.038846	-0.182292	0.0145337	0.186071	0.351963	-0.169957	0.797935
REACTOME_CELLULAR_RESPONSE_TO_CHEMICAL_STRESS	-0.0217794	-0.00184866	0.0057971	0.0222406	0.00894024	0.0416852	0.00852484	0.79774
BHAT_ESR1_TARGETS_NOT_VIA_AKT1_UP	-0.0783889	-0.0185381	-0.020722	0.00643714	0.0628004	0.0755884	-0.00329646	0.797266
BIOCARTA_BCR_PATHWAY	-0.0893686	0.0263945	-0.0461412	-0.0173121	0.0371543	0.0162327	4.92014e-06	0.796985
MULLIGHAN_NPM1_SIGNATURE_3_UP	-0.0351848	0.0234617	-0.0321951	0.0270175	-0.0194254	0.0477338	-0.0427885	0.796556
WP_TRANSLATION_FACTORS	-0.00300496	0.00241634	-0.00579342	0.00770027	0.0083959	0.0477827	-0.0103825	0.796207
REACTOME_MITOTIC_G1_PHASE_AND_G1_S_TRANSITION	-0.0306014	-0.00438126	0.0210618	0.0101445	0.00502183	0.114782	-0.0103367	0.795716
KRIGE_RESPONSE_TO_TOSEDOSTAT_24HR_DN	-0.00910392	0.00846329	0.0131536	0.010562	-0.00496676	0.0561811	-0.00032547	0.795574
REACTOME_EUKARYOTIC_TRANSLATION_ELONGATION	-0.00168109	0.00141752	-0.00288035	-0.00305965	0.000756097	0.00343954	0.000398949	0.794935
KYNG_ENVIRONMENTAL_STRESS_RESPONSE_NOT_BY_UV_IN_OLD	-0.0497637	-0.00478478	-0.107684	0.0199139	-0.0234281	0.158481	0.0331912	0.79489
REACTOME_G2_M_CHECKPOINTS	-0.0410244	0.00463419	0.029234	0.0275221	-0.00890505	0.0997175	0.00431882	0.794809
ZHANG_RESPONSE_TO_CANTHARIDIN_DN	-0.0102968	0.00706259	-0.00349895	-0.00549239	-0.00638138	0.130519	-0.0031194	0.794482
SCHLOSSER_MYC_TARGETS_REPRESSED_BY_SERUM	-0.0237264	-0.000166731	0.014215	-0.0134329	-0.000915899	0.0994968	-0.00942109	0.793312
PELLICCIOTTA_HDAC_IN_ANTIGEN_PRESENTATION_DN	-0.0291265	0.0178281	0.00842997	0.063162	0.0347507	0.0764125	-0.00117534	0.79261
YORDY_RECIPROCAL_REGULATION_BY_ETS1_AND_SP100_DN	-0.0989173	-0.0362994	-0.00944559	-0.00148169	0.00136107	0.0628474	0.00810954	0.792273
REACTOME_MITOTIC_G2_G2_M_PHASES	-0.0520973	-0.00690234	0.0139699	0.0292608	-0.00348059	0.0706889	0.00764744	0.791515
ZHAN_MULTIPLE_MYELOMA_SUBGROUPS	0.00230737	0.02248	0.0265342	0.0132716	0.0109442	0.102171	0.00195229	0.791351
REACTOME_NERVOUS_SYSTEM_DEVELOPMENT	-0.0077377	0.00375014	0.00110604	-0.0013629	0.0112392	0.0102495	0.00357554	0.790374
REACTOME_EUKARYOTIC_TRANSLATION_INITIATION	-0.00329656	0.0015009	-0.00441216	0.00238038	-0.00542308	0.0149838	-0.00427103	0.790325
POMEROY_MEDULLOBLASTOMA_DESMOPLASIC_VS_CLASSIC_UP	-0.000880109	0.0249848	-0.0463888	0.0043102	0.0148565	0.0752675	-0.0198636	0.789407
POMEROY_MEDULLOBLASTOMA_PROGNOSIS_DN	0.00217294	0.0104088	-0.018763	0.00204728	0.00603156	0.0375492	0.00117402	0.789302
KRIGE_RESPONSE_TO_TOSEDOSTAT_6HR_DN	-0.00813297	0.00412164	-0.000763877	0.0229869	-0.00516509	0.0729956	0.00877074	0.788339
SCIBETTA_KDM5B_TARGETS_DN	-0.0353919	0.0131306	0.00257017	-0.0454559	-0.00935202	0.148773	-0.0551687	0.788155
BIOCARTA_FMLP_PATHWAY	-0.115774	0.0226759	-0.0981006	-0.0169896	0.0301634	0.0463342	0.0480049	0.786568
MULLIGHAN_NPM1_MUTATED_SIGNATURE_2_DN	-0.0243172	0.00446717	-0.019999	-0.00366829	0.0486046	0.0513927	-0.00577976	0.786493
YAO_TEMPORAL_RESPONSE_TO_PROGESTERONE_CLUSTER_17	-0.0215934	0.00142919	0.00918416	0.00794354	-0.0159434	0.102462	0.013572	0.785391
MOOTHA_HUMAN_MITODB_6_2002	-0.0164276	-0.00157158	-0.0143175	0.00497149	-0.0216516	0.109888	-0.00720616	0.784747
FERRANDO_T_ALL_WITH_MLL_ENL_FUSION_DN	0.00564345	0.0170435	-0.0238769	0.0407904	0.0306681	0.0964777	0.00500879	0.784085
KYNG_ENVIRONMENTAL_STRESS_RESPONSE_NOT_BY_4NQO_IN_WS	-0.0798916	-0.0223103	-0.0131503	0.0616086	-0.0308255	0.137038	-0.0115124	0.783708
BIOCARTA_NTHI_PATHWAY	-0.269782	-0.0202461	-0.203353	0.13295	0.0220313	0.138732	0.0120015	0.783366
KEGG_PROPANOATE_METABOLISM	-0.00689815	0.015547	-0.0302994	-0.015971	0.00390092	0.116647	-0.0440735	0.783155
WP_CANCER_IMMUNOTHERAPY_BY_PD1_BLOCKADE	-0.206943	-0.0211377	-0.0551246	0.124378	0.0647186	0.141396	-0.0179061	0.783024
YAO_TEMPORAL_RESPONSE_TO_PROGESTERONE_CLUSTER_14	2.46345e-05	0.0182023	0.0314453	0.0286396	0.0101866	0.0890829	0.0181755	0.78207
CHIARADONNA_NEOPLASTIC_TRANSFORMATION_KRAS_UP	-0.0512335	0.0137407	-0.0998655	-0.000963759	0.0708792	0.0955861	0.0173721	0.78186
REACTOME_GAP_FILLING_DNA_REPAIR_SYNTHESIS_AND_LIGATION_IN_GG_NER	-0.046732	0.0110911	0.0152263	-0.0076255	-0.0522281	0.148302	0.00322806	0.781135
REACTOME_RNA_POLYMERASE_II_TRANSCRIPTION	-0.0483538	-0.00159943	-0.0189703	0.0175301	0.0356724	0.0346682	0.00867781	0.780843
MARTINEZ_RESPONSE_TO_TRABECTEDIN_UP	-0.0156568	0.00996365	-0.0119295	0.0229627	0.022265	0.0278243	-0.00759155	0.780402
ROZANOV_MMP14_TARGETS_SUBSET	-0.066055	0.0262767	-0.0942209	0.000999532	0.0693391	0.0670062	-0.0587416	0.779496
KEGG_OXIDATIVE_PHOSPHORYLATION	-0.0184415	0.00527432	-0.0443139	0.0154879	-0.0185795	0.055808	0.00536983	0.779238
MARTENS_TRETINOIN_RESPONSE_DN	-0.0267919	0.00412697	0.00768415	0.0159824	0.0159338	0.0235816	0.00593643	0.778281
LEE_AGING_MUSCLE_UP	-0.0594638	0.00893527	-0.0283021	-0.0038041	0.0213911	0.0186229	0.020326	0.778256
ELVIDGE_HYPOXIA_BY_DMOG_DN	0.00769594	0.0375472	0.0127	-0.00814133	0.037238	0.188688	-0.0298406	0.777889
PID_BCR_5PATHWAY	-0.114199	0.0228107	-0.0842204	0.0544168	0.0688793	0.0664245	0.0238825	0.777876
POS_HISTAMINE_RESPONSE_NETWORK	-0.0792022	0.00569115	-0.11203	0.0578996	0.110386	0.138905	-0.00425915	0.777355
REACTOME_RRNA_MODIFICATION_IN_THE_NUCLEUS_AND_CYTOSOL	-0.0309659	0.01297	0.0321478	-0.0184531	0.00803468	0.0712291	0.00349516	0.776814
KEGG_ARGININE_AND_PROLINE_METABOLISM	-0.0659129	-0.0243573	-0.00790186	0.0328241	0.0388292	0.106036	-0.0483502	0.776763
CHEN_ETV5_TARGETS_SERTOLI	-0.0183325	-0.00408118	-0.0222907	-0.0374936	0.00623262	0.0897301	0.00814759	0.776422
REACTOME_BRANCHED_CHAIN_AMINO_ACID_CATABOLISM	-0.229068	0.0415612	-0.0353072	0.0968432	-0.224255	0.476216	-0.26857	0.775438
WP_PHOTODYNAMIC_THERAPYINDUCED_NFE2L2_NRF2_SURVIVAL_SIGNALING	-0.135399	0.00462128	-0.0252368	0.0365551	-0.000972393	0.0432421	0.0241292	0.775115
BLALOCK_ALZHEIMERS_DISEASE_INCIPIENT_DN	-0.0358281	0.0130309	-0.0173233	-0.0188866	0.0056762	0.00188318	-0.000929935	0.77485
LU_AGING_BRAIN_DN	-0.0288	0.00793454	-0.030896	-0.0363305	-0.0189312	0.0323052	0.0121414	0.774386
MAGRANGEAS_MULTIPLE_MYELOMA_IGLL_VS_IGLK_DN	-0.28629	-0.0558918	-0.0453446	0.0787643	0.0715311	0.130021	-0.0190885	0.773876
REACTOME_COOPERATION_OF_PDCL_PHLP1_AND_TRIC_CCT_IN_G_PROTEIN_BETA_FOLDING	-0.0232634	0.00805276	0.0107574	0.0349915	0.0193877	0.0546677	-0.0163421	0.773866
DAZARD_UV_RESPONSE_CLUSTER_G6	-0.0662089	0.0250209	-0.0466484	0.0444496	-0.0128129	0.0347435	-0.0454431	0.773588
ENK_UV_RESPONSE_KERATINOCYTE_DN	-0.03995	0.00769597	-0.00185219	0.0328846	0.0293645	0.0454778	-0.0265449	0.772869
MARIADASON_RESPONSE_TO_BUTYRATE_SULINDAC_6	-0.0313055	0.0231063	0.0105808	-0.0161224	0.0184947	0.0707796	-0.0542954	0.772558
WP_SUDDEN_INFANT_DEATH_SYNDROME_SIDS_SUSCEPTIBILITY_PATHWAYS	-0.0518533	-0.00759023	-0.0490479	0.0486854	0.0309641	0.0659462	-0.00614052	0.771899
WP_RESISTIN_AS_A_REGULATOR_OF_INFLAMMATION	-0.152268	0.0472886	-0.192433	0.084711	0.00269871	0.113188	0.0541504	0.771528
GENTILE_UV_RESPONSE_CLUSTER_D5	-0.0581127	-0.032232	-0.0187962	0.030301	-0.0402503	0.194383	-0.0056901	0.770333
WANG_TUMOR_INVASIVENESS_UP	0.00376929	0.0135576	-0.00615139	0.015502	0.0153439	0.0354937	-0.00748893	0.769952
WP_FOLLICLE_STIMULATING_HORMONE_FSH_SIGNALING_PATHWAY	-0.121356	0.00837998	-0.131977	-0.161	0.0134662	0.141681	0.0537487	0.76969
LIU_LIVER_CANCER	-0.282843	-0.149317	-0.286466	-0.471601	0.146498	0.875449	-0.333174	0.769113
REACTOME_PROGRAMMED_CELL_DEATH	-0.0403717	-0.000899222	0.0179957	0.02819	0.015694	0.0497314	-0.00145427	0.768347
SASSON_RESPONSE_TO_FORSKOLIN_UP	-0.0788277	0.0107002	-0.0727323	0.00513773	0.0626216	0.0534839	0.0287637	0.768165
REACTOME_STIMULI_SENSING_CHANNELS	-0.102016	-0.0302001	9.81553e-05	0.00063242	0.0385821	0.07612	0.0195309	0.768159
REACTOME_TRANSPORT_OF_SMALL_MOLECULES	-0.00922528	-0.00850438	-0.0143116	0.0127648	0.0110261	0.0581041	-0.00739665	0.76807
BHAT_ESR1_TARGETS_VIA_AKT1_UP	-0.0937652	0.00150102	-0.0160201	0.0236523	0.047547	0.0446606	0.0203216	0.76757
GENTILE_RESPONSE_CLUSTER_D3	-0.222704	0.0239616	-0.150655	0.0986374	0.0280585	0.0739548	0.0240709	0.767104
OSADA_ASCL1_TARGETS_DN	-0.192452	-0.0138153	-0.0997326	0.119025	0.0673131	0.118151	0.00817066	0.76709
BIOCARTA_TCR_PATHWAY	-0.096278	0.0113384	-0.0910719	0.0208185	0.0498404	0.0406608	0.0107405	0.766606
FRASOR_RESPONSE_TO_ESTRADIOL_UP	-0.114501	0.0247294	-0.238145	0.0371205	0.0695195	0.161152	0.0394596	0.766489
CHANDRAN_METASTASIS_TOP50_DN	-0.0826432	0.0273182	-0.0412629	0.0411385	0.0517563	0.035753	0.00339621	0.765968
KYNG_ENVIRONMENTAL_STRESS_RESPONSE_NOT_BY_GAMMA_IN_WS	-0.0603069	-0.0179647	-0.0870486	0.0460524	0.0587403	0.107111	-0.0209111	0.765808
MORI_EMU_MYC_LYMPHOMA_BY_ONSET_TIME_UP	-0.0387386	0.0241108	0.054167	-0.0128888	-0.0174996	0.187955	-0.0240178	0.764958
REACTOME_SEPARATION_OF_SISTER_CHROMATIDS	-0.0284725	-0.00111043	0.0199841	0.0385248	-0.00044882	0.0863648	0.00429561	0.763367
PID_S1P_S1P2_PATHWAY	-0.0563786	0.00609048	-0.0204643	0.00527656	0.0135913	0.0174722	0.0215958	0.763126
KYNG_ENVIRONMENTAL_STRESS_RESPONSE_NOT_BY_GAMMA_IN_OLD	-0.0530653	-0.0191894	-0.0175657	0.0703882	0.0221632	0.133534	-0.0331761	0.762824
REACTOME_THE_CITRIC_ACID_TCA_CYCLE_AND_RESPIRATORY_ELECTRON_TRANSPORT	-0.017998	0.0035842	-0.0483505	0.0189716	-0.0244029	0.0628827	-0.00758246	0.762815
REACTOME_NEPHRIN_FAMILY_INTERACTIONS	-0.0977511	0.0480069	-0.0582048	0.0678273	0.0857564	0.0701324	-0.0533214	0.761255
BENPORATH_MYC_MAX_TARGETS	-0.0148002	-0.00432811	0.00497341	0.0043126	-0.00986389	0.0546642	-0.0114091	0.760971
BIOCARTA_TOLL_PATHWAY	-0.107567	-0.0101709	-0.113606	0.0805035	0.0183785	0.0919534	0.00807501	0.76068
HAHTOLA_MYCOSIS_FUNGOIDES_SKIN_UP	-0.0110288	0.00523705	-0.00846141	0.0114411	0.0221132	0.0217351	-0.00702317	0.760617
KEGG_RIBOSOME	-0.00133245	0.0020638	-0.00436811	-0.000109989	-0.00376868	0.00634722	-0.000372799	0.759992
KEGG_ALZHEIMERS_DISEASE	-0.0164625	0.00838805	-0.0339942	0.024563	-0.0290742	0.0667469	-0.00738388	0.758461
WONG_PROTEASOME_GENE_MODULE	-0.044682	-0.00950136	0.0204765	0.0392311	0.0188119	0.0826612	-0.00988309	0.758411
LEE_TARGETS_OF_PTCH1_AND_SUFU_UP	-0.0356567	-0.00880422	0.00169628	0.0417164	0.0488577	0.100944	-0.0271406	0.758273
BOYAULT_LIVER_CANCER_SUBCLASS_G3_UP	-0.00575054	0.00922075	-0.00549911	0.00408813	-0.017572	0.108527	-0.0225203	0.758084
MODY_HIPPOCAMPUS_PRENATAL	-0.0173305	0.0109407	0.00357956	0.0375681	0.00607475	0.0486051	-0.0145066	0.757323
WP_CARDIAC_HYPERTROPHIC_RESPONSE	-0.072578	0.0137208	-0.0911672	-0.0206603	0.0398721	0.0388932	0.0239484	0.755551
BIOCARTA_GPCR_PATHWAY	-0.0774655	0.0329488	-0.0813075	0.0165239	0.0528085	0.033089	0.00780268	0.755256
KEGG_ADIPOCYTOKINE_SIGNALING_PATHWAY	-0.0872966	0.0112784	-0.170083	0.0812226	0.0681128	0.160452	0.0491112	0.754791
REACTOME_ESTROGEN_DEPENDENT_NUCLEAR_EVENTS_DOWNSTREAM_OF_ESR_MEMBRANE_SIGNALING	-0.0655713	0.00795959	-0.0720875	-0.0224818	0.040506	0.080255	0.0669916	0.754319
WP_GLYCOGEN_SYNTHESIS_AND_DEGRADATION	-0.0926361	0.0268572	-0.0339306	0.0871946	0.0301016	0.0707971	-0.0536678	0.753459
REACTOME_ANTIGEN_PROCESSING_CROSS_PRESENTATION	-0.0325996	-0.00888051	0.0185997	0.0199225	0.0324246	0.0653707	0.00645932	0.752977
PAL_PRMT5_TARGETS_UP	-0.0280829	0.0446376	0.0109507	0.0908912	0.00189213	0.094776	0.00150161	0.752449
WP_DNA_REPLICATION	-0.0935021	0.00312628	0.0709765	0.0265475	-0.0713966	0.278902	-0.00800038	0.752362
MULLIGHAN_NPM1_SIGNATURE_3_DN	-0.0110492	-0.00905273	-0.00874324	-0.0144156	-0.00179187	0.0277469	-0.000324067	0.752355
REACTOME_REGULATION_OF_TP53_EXPRESSION_AND_DEGRADATION	-0.121619	-0.0185834	-0.0151014	0.0136216	0.00320403	0.0403862	0.0237747	0.751273
REACTOME_MITOCHONDRIAL_BIOGENESIS	-0.0150757	0.00521393	-0.00604506	-0.0361397	-0.00609768	0.0500643	-0.000824361	0.750335
REACTOME_INFECTION_WITH_MYCOBACTERIUM_TUBERCULOSIS	-0.0487796	0.00567082	0.0106996	0.0146824	0.02865	0.030015	-0.0153209	0.750153
WP_STRUCTURAL_PATHWAY_OF_INTERLEUKIN_1_IL1	-0.175819	-0.0205893	-0.143657	0.0447891	-0.00650567	0.058815	0.041751	0.748696
DAZARD_UV_RESPONSE_CLUSTER_G1	-0.0138733	0.0154106	-0.0311115	0.0134498	0.0250868	0.0285654	0.0127382	0.748275
SAKAI_TUMOR_INFILTRATING_MONOCYTES_DN	0.000264338	0.00613927	0.0106166	0.0197458	0.0269453	0.0579281	-0.00638582	0.748259
KEGG_RETINOL_METABOLISM	-0.120678	0.0419935	-0.326789	0.0883465	0.162487	0.278234	-0.136523	0.748231
BRACHAT_RESPONSE_TO_CAMPTOTHECIN_DN	-0.0153557	0.00336127	-0.0522118	0.0280197	0.0457209	0.096905	-0.0376396	0.747564
SASSON_RESPONSE_TO_GONADOTROPHINS_UP	-0.0683502	0.00527859	-0.0581186	0.0358462	0.0417261	0.0413999	0.0158406	0.746986
DUTERTRE_ESTRADIOL_RESPONSE_6HR_UP	-0.0623786	-0.0135147	-0.016193	0.0059181	-0.0401332	0.0701871	0.0337056	0.746983
TSENG_ADIPOGENIC_POTENTIAL_DN	-0.0822889	-0.0426059	-0.111175	0.0649182	0.0506008	0.140977	0.0049339	0.746952
BURTON_ADIPOGENESIS_4	-0.0355821	-0.0173392	0.00260813	0.0490124	0.0324799	0.0997325	-0.002797	0.746871
WP_IL1_SIGNALING_PATHWAY	-0.104033	-0.00376817	-0.0892148	0.0455949	-0.00861185	0.0562399	0.0393913	0.74625
REACTOME_MAPK_FAMILY_SIGNALING_CASCADES	-0.0326873	-0.00628207	-0.0201674	0.0166295	0.0385024	0.0421454	0.0139692	0.745756
MCCLUNG_COCAIN_REWARD_4WK	-0.211464	-0.0400064	-0.217174	0.0835743	-0.00573472	0.139638	0.0743827	0.745737
ZHAN_VARIABLE_EARLY_DIFFERENTIATION_GENES_DN	-0.0261442	0.00166123	0.0213744	-0.0229456	0.0019723	0.0703805	0.0135989	0.745554
DAWSON_METHYLATED_IN_LYMPHOMA_TCL1	-0.102641	0.045809	-0.164799	0.0592979	0.134194	0.11859	-0.0111145	0.745261
WP_LIPID_METABOLISM_PATHWAY	-0.0132339	0.0343514	-0.251598	0.0428823	0.0325717	0.318643	-0.03657	0.744409
REACTOME_COMPLEX_I_BIOGENESIS	-0.00526474	0.024061	-0.0725476	0.0537883	0.0155613	0.110181	-0.0126732	0.743924
REACTOME_DNA_DAMAGE_BYPASS	-0.0416592	0.0157732	0.0380684	0.0259316	0.0210016	0.0550751	-0.00931743	0.74339
REACTOME_MITOPHAGY	-0.0736957	0.00308328	0.0119445	0.0232371	0.0105333	0.0295584	-0.0104728	0.742686
WELCSH_BRCA1_TARGETS_DN	-0.0438006	0.015587	-0.00779821	0.00686205	0.0628616	0.0394133	0.00844178	0.742509
REACTOME_MITOTIC_METAPHASE_AND_ANAPHASE	-0.01186	0.00504399	0.0227396	0.0327674	-0.00147243	0.0829494	0.00633095	0.741104
KEGG_CITRATE_CYCLE_TCA_CYCLE	-0.0982032	-0.00655844	0.0169854	0.000624794	-0.147316	0.369734	-0.0680027	0.740884
REACTOME_APOPTOSIS	-0.0280379	-0.00619775	0.0188338	0.0270528	-0.00632232	0.0757898	-0.00217589	0.740837
REACTOME_DARPP_32_EVENTS	-0.0672721	0.0244347	-0.0507786	0.0621719	0.0790381	0.0650192	-0.0186038	0.740421
REACTOME_RESPIRATORY_ELECTRON_TRANSPORT_ATP_SYNTHESIS_BY_CHEMIOSMOTIC_COUPLING_AND_HEAT_PRODUCTION_BY_UNCOUPLING_PROTEINS	-0.0158333	0.00528335	-0.0461027	0.0215915	-0.0242433	0.0563474	-0.00659942	0.740413
WP_SARSCOV2_MITOCHONDRIAL_INTERACTIONS	-0.0503628	0.00472808	-0.0286651	0.0617452	-0.0489327	0.179894	-0.0931171	0.740068
KEGG_PARKINSONS_DISEASE	-0.00820068	-0.00187075	-0.0348065	0.0130508	-0.018161	0.065495	-0.00586197	0.740011
KORKOLA_SEMINOMA_UP	-0.0220079	0.00499515	0.0085905	-0.0299548	0.00592481	0.114262	-0.0546662	0.739329
KEGG_MTOR_SIGNALING_PATHWAY	-0.0259372	0.03281	-0.0777654	-0.0918559	0.0239603	0.0972404	-0.0205707	0.738902
YAGI_AML_RELAPSE_PROGNOSIS	-0.0268236	0.0230798	-0.0524101	0.0414457	0.0538848	0.0591932	0.0193092	0.737918
LI_LUNG_CANCER	-0.0133313	-0.00261803	-0.0296795	0.0269941	0.0268862	0.05162	-0.00382539	0.737526
WHITFIELD_CELL_CYCLE_S	-0.0249828	-0.00175371	-0.00322212	-0.0566996	-0.0160051	0.12678	0.00440365	0.737232
ONO_AML1_TARGETS_DN	-0.097315	0.0121082	-0.124032	0.0385748	0.059532	0.0696022	0.0368051	0.736757
CAIRO_LIVER_DEVELOPMENT_UP	-0.0556405	0.0154542	-0.015907	-0.0207733	0.0262953	0.017967	0.0227269	0.735594
GOBERT_OLIGODENDROCYTE_DIFFERENTIATION_UP	0.030528	0.0740343	0.0498407	0.0296469	0.0490117	0.134494	-0.0161348	0.735383
WP_FIBRIN_COMPLEMENT_RECEPTOR_3_SIGNALING_PATHWAY	-0.0335683	0.0280161	-0.162182	0.0686616	-0.0340638	0.173041	-0.0450815	0.734977
DURCHDEWALD_SKIN_CARCINOGENESIS_UP	-0.072299	-0.0126251	0.0478179	0.0105823	-0.00586469	0.172735	-0.0795899	0.734043
WATANABE_RECTAL_CANCER_RADIOTHERAPY_RESPONSIVE_UP	-0.000264338	0.00196886	-0.0229728	0.0200327	0.0161837	0.0532454	-0.007004	0.733722
REACTOME_RESPIRATORY_ELECTRON_TRANSPORT	-0.0225512	0.00176235	-0.0491516	0.0382481	-0.0215661	0.0670818	-0.00827559	0.733373
MANALO_HYPOXIA_DN	-0.0501321	0.0170031	0.0796286	-0.0432531	-0.00187887	0.221561	0.00739434	0.733223
ZHANG_ANTIVIRAL_RESPONSE_TO_RIBAVIRIN_DN	-0.0555016	-0.0261832	-0.0082051	0.0295404	-0.0282293	0.0754714	-0.0387905	0.732941
REACTOME_GLYCOLYSIS	-0.0254934	0.00447549	-0.0235718	0.023353	0.0582234	0.0684092	-0.0344017	0.732213
REACTOME_TRANSCRIPTIONAL_REGULATION_BY_E2F6	-0.168995	-0.0238469	0.0809615	-0.0959784	-0.121219	0.361677	-0.152947	0.732076
FOURNIER_ACINAR_DEVELOPMENT_LATE_2	0.00378182	0.038121	-0.0136644	-0.0131333	0.059422	0.071782	-0.00986121	0.731869
PID_HES_HEY_PATHWAY	-0.158952	-0.0101935	-0.04888	0.0589646	0.118804	0.0841537	-0.00799734	0.731429
TERAMOTO_OPN_TARGETS_CLUSTER_6	-0.00789254	-0.000704881	0.0101783	0.00353828	-0.00289324	0.0361371	0.00757443	0.730916
TOOKER_GEMCITABINE_RESISTANCE_DN	-0.0188531	0.014182	-0.0775023	0.0269376	0.0283321	0.0657944	0.00167789	0.730847
FIGUEROA_AML_METHYLATION_CLUSTER_5_DN	-0.0443014	0.0598912	-0.0420608	0.0162665	-0.113687	0.156199	-0.0689617	0.730712
REACTOME_P75_NTR_RECEPTOR_MEDIATED_SIGNALLING	-0.0307224	0.00609842	-0.0383931	0.0331847	0.0383236	0.0401105	-0.00851799	0.730085
REACTOME_REGULATION_OF_TP53_ACTIVITY	-0.079155	0.00560577	0.0494421	2.46357e-06	-0.0485949	0.109403	-0.0135439	0.729894
REACTOME_CYCLIN_A_B1_B2_ASSOCIATED_EVENTS_DURING_G2_M_TRANSITION	-0.107299	0.00674393	0.0363885	-0.0624744	0.0010434	0.129307	-0.133811	0.729381
WIKMAN_ASBESTOS_LUNG_CANCER_DN	-0.0641229	-0.0264838	-0.0740605	0.0124324	0.0879943	0.101058	-0.0493539	0.729246
XU_GH1_AUTOCRINE_TARGETS_UP	-0.000340745	-0.00701719	-0.00936312	-0.000144681	0.00937153	0.0698543	0.000188847	0.72921
REACTOME_REGULATION_OF_PTEN_GENE_TRANSCRIPTION	-0.0923514	-0.00898068	0.0191576	-0.00701798	-0.0052282	0.0493044	0.0265265	0.728925
THEILGAARD_NEUTROPHIL_AT_SKIN_WOUND_UP	-0.0442835	-0.0012513	-0.07247	0.0405063	0.0556385	0.0681986	-0.00215996	0.727993
YAO_TEMPORAL_RESPONSE_TO_PROGESTERONE_CLUSTER_8	-0.0849795	-0.0308366	-0.224464	-0.116962	0.0107049	0.152145	0.0146065	0.727366
WP_OXIDATIVE_PHOSPHORYLATION	-0.00757994	0.0174882	-0.0619369	0.025258	0.00791261	0.0596351	-0.00434687	0.727168
REACTOME_CD28_DEPENDENT_PI3K_AKT_SIGNALING	-0.125774	0.117798	-0.309012	-0.123877	-0.301049	0.357211	0.0382092	0.726986
REACTOME_METABOLISM_OF_RNA	-0.0253922	0.00887959	0.0238215	0.00224877	-0.000401047	0.0312619	0.00571009	0.726861
COLLER_MYC_TARGETS_UP	-0.0198154	-0.0100254	-0.0179694	0.011292	-0.0452634	0.198352	-0.0466458	0.726736
WP_TYPE_2_PAPILLARY_RENAL_CELL_CARCINOMA	-0.031269	-0.0343048	-0.121402	-0.00158315	0.0770196	0.183783	-0.0121116	0.725946
RHODES_CANCER_META_SIGNATURE	-0.000438709	0.0243591	-0.010876	0.0474293	0.0519885	0.0585461	0.00618933	0.725795
WP_MITOCHONDRIAL_COMPLEX_I_ASSEMBLY_MODEL_OXPHOS_SYSTEM	-0.0185345	0.0178279	-0.085778	0.0702664	-0.0129788	0.124166	-0.0239098	0.725439
BURTON_ADIPOGENESIS_5	0.00511773	-0.00466466	-0.0114198	-0.00373132	0.0131502	0.16263	-0.0192113	0.724292
SCHLOSSER_MYC_TARGETS_AND_SERUM_RESPONSE_DN	-0.0588565	0.0110582	0.03828	-0.0484315	-0.0456748	0.118107	-0.00399538	0.724214
PUJANA_CHEK2_PCC_NETWORK	0.0117646	0.035141	0.0206887	-0.00337465	0.0108011	0.0679551	-0.00521752	0.724007
REACTOME_COPI_MEDIATED_ANTEROGRADE_TRANSPORT	0.00607806	0.0193772	-0.0356371	-0.016633	0.0399247	0.0759355	0.01099	0.72379
MULLIGHAN_NPM1_MUTATED_SIGNATURE_1_UP	-0.0262571	0.0208596	-0.0298571	0.0461487	-0.0392659	0.0836524	-0.0420308	0.723665
MATTIOLI_MGUS_VS_PCL	-0.0222712	0.0122371	0.00661938	0.025074	0.00672329	0.0230185	0.0189035	0.722833
KEGG_APOPTOSIS	-0.0750122	-0.00609687	-0.079015	0.115328	0.0097856	0.120136	-0.00301983	0.722514
REACTOME_ORGANELLE_BIOGENESIS_AND_MAINTENANCE	-0.027644	0.0124709	0.00199837	-0.014758	-0.00287403	0.0078819	0.00648327	0.722264
FOURNIER_ACINAR_DEVELOPMENT_LATE_DN	-0.019067	0.00581654	0.0149535	-0.0149498	0.0589594	0.185448	-0.0779815	0.722059
NIKOLSKY_BREAST_CANCER_17Q11_Q21_AMPLICON	-0.0309804	-0.0170421	0.0150384	0.0288296	0.0214875	0.0879784	-0.0215384	0.722017
REACTOME_MRNA_SPLICING_MINOR_PATHWAY	-0.0136865	0.0335956	-0.00755026	0.00620453	0.0252282	0.0242871	0.0323899	0.721858
KAYO_AGING_MUSCLE_DN	0.00091277	0.0127424	-0.0582169	0.00285149	0.0208269	0.0705782	-0.0194275	0.721069
WEIGEL_OXIDATIVE_STRESS_RESPONSE	-0.0861424	0.00340931	-0.0344877	0.0668234	0.0603034	0.0555545	-0.000805368	0.720614
PEDERSEN_TARGETS_OF_611CTF_ISOFORM_OF_ERBB2	-0.0476591	-0.00760859	-0.117376	-0.0139273	0.0986762	0.116058	-0.0343976	0.720551
GINESTIER_BREAST_CANCER_20Q13_AMPLIFICATION_DN	-0.0664218	7.46209e-05	0.0247218	0.00757795	0.0373489	0.0441457	-0.0199646	0.720327
BILD_E2F3_ONCOGENIC_SIGNATURE	-0.0292746	0.00429836	-0.013472	-0.0550491	-0.0662995	0.164974	-0.0528271	0.719686
REACTOME_ANTIGEN_PROCESSING_UBIQUITINATION_PROTEASOME_DEGRADATION	-0.0430554	-0.0153135	0.0252992	0.00667044	0.0202122	0.0609248	-0.00157336	0.718284
REACTOME_AUTOPHAGY	-0.0041295	0.00697115	0.00782156	0.00359343	-0.00205214	0.0132334	0.00709213	0.717999
REACTOME_CITRIC_ACID_CYCLE_TCA_CYCLE	-0.149699	-0.0144672	0.00296525	0.00727469	-0.192456	0.257718	0.011447	0.717313
LE_EGR2_TARGETS_UP	-0.0596712	0.0633868	-0.0276065	0.0935993	0.0371391	0.0544128	0.0147267	0.717292
KEGG_NEUROTROPHIN_SIGNALING_PATHWAY	-0.0775618	0.0312016	-0.0447298	-0.0218599	0.0530756	0.0189129	0.0217353	0.71646
WP_TRYPTOPHAN_METABOLISM	-0.162918	0.0780351	0.0431098	0.0107391	0.0275675	0.0383247	-0.0189743	0.715881
KARLSSON_TGFB1_TARGETS_UP	-0.0114609	-0.0170496	-0.0103675	-0.0161695	0.0571491	0.127158	-0.00263508	0.715774
STARK_PREFRONTAL_CORTEX_22Q11_DELETION_DN	0.00399797	-0.00258546	-0.0140248	-0.00948082	0.0134838	0.0721795	-0.00111679	0.715507
SUNG_METASTASIS_STROMA_DN	-0.107445	0.0290257	0.0611025	0.0379659	0.0449156	0.0704398	0.00429941	0.714953
KORKOLA_EMBRYONAL_CARCINOMA_UP	-0.0253783	-0.00379553	0.012126	-0.0480599	0.00807879	0.0982153	-0.0352942	0.713157
REACTOME_METABOLISM_OF_AMINO_ACIDS_AND_DERIVATIVES	-0.00697533	-0.0034951	0.00573844	0.0117631	-0.00533386	0.0404286	-0.000340982	0.710242
REN_BOUND_BY_E2F	0.0147284	0.0730653	0.081771	0.068746	-0.0200211	0.224288	0.012653	0.710176
GARY_CD5_TARGETS_DN	-0.0141495	0.0185095	0.0150497	-0.0390343	-0.0150006	0.0773403	-0.000418139	0.7083
KEGG_TYPE_II_DIABETES_MELLITUS	-0.155179	0.0227024	-0.130638	0.182318	0.113327	0.140347	-0.0232868	0.708287
VANOEVELEN_MYOGENESIS_SIN3A_TARGETS	-0.00748659	-0.0170392	-0.0162735	0.0186659	0.000293916	0.108426	-0.0240418	0.708212
BOHN_PRIMARY_IMMUNODEFICIENCY_SYNDROM_UP	0.00625932	0.00830057	-0.0517757	0.0268699	0.0710133	0.122822	-0.0149676	0.707483
REACTOME_AGGREPHAGY	-0.0459978	0.00756519	-0.021886	0.00880794	0.00562801	0.0235805	0.0376041	0.707336
MADAN_DPPA4_TARGETS	-0.00992045	-0.0172832	-0.00155642	0.0302812	-0.0166344	0.188838	-0.0231558	0.707156
WP_16P112_PROXIMAL_DELETION_SYNDROME	-0.0678382	0.000282122	0.00521343	0.0162707	0.0316349	0.0248917	0.00614113	0.706936
WP_NAD_METABOLISM_IN_ONCOGENEINDUCED_SENESCENCE_AND_MITOCHONDRIAL_DYSFUNCTIONASSOCIATED_SENESCENCE	-0.089941	-0.0515278	0.0858528	0.0513075	0.0670338	0.349279	-0.101096	0.70568
MARTINEZ_TP53_TARGETS_DN	-0.0122599	0.000185805	-0.0270505	0.00622519	0.0181518	0.0195309	0.000162704	0.705576
REACTOME_PYRUVATE_METABOLISM_AND_CITRIC_ACID_TCA_CYCLE	-0.0474919	-0.0230409	0.015609	-0.0394935	-0.0638073	0.189525	-0.0113223	0.705303
SPIELMAN_LYMPHOBLAST_EUROPEAN_VS_ASIAN_UP	-0.00779213	0.00334447	0.0125928	0.0199195	0.00052916	0.0323498	0.0021876	0.704714
ZAMORA_NOS2_TARGETS_UP	-0.0272669	-0.00721318	0.031067	-0.0283017	-0.0108245	0.120704	-0.0196815	0.703735
WP_PHOTODYNAMIC_THERAPYINDUCED_HIF1_SURVIVAL_SIGNALING	-0.0590429	0.00727283	-0.161835	0.043472	0.200215	0.219597	-0.0698632	0.703427
REACTOME_NEGATIVE_REGULATION_OF_FGFR4_SIGNALING	-0.131198	-0.0104821	0.0131511	0.0373343	0.051879	0.0530475	0.00505133	0.703216
REACTOME_NEGATIVE_REGULATION_OF_FGFR1_SIGNALING	-0.131244	-0.0105171	0.0131161	0.0372876	0.0515593	0.0530008	0.00559998	0.703148
REACTOME_ASSOCIATION_OF_TRIC_CCT_WITH_TARGET_PROTEINS_DURING_BIOSYNTHESIS	-0.0214596	-0.00167525	0.0109433	0.0264388	-0.0374881	0.123024	-0.0278349	0.703016
REACTOME_CHROMOSOME_MAINTENANCE	0.0204652	0.0504912	0.0513255	0.0594711	0.026293	0.141672	-0.0204128	0.702833
DIAZ_CHRONIC_MEYLOGENOUS_LEUKEMIA_UP	-0.00055661	-0.000191133	0.0100744	-0.00108703	0.0124629	0.0482748	-0.00672121	0.702327
SHEPARD_BMYB_MORPHOLINO_UP	-0.0241481	0.00873751	-0.0392437	0.0300484	0.0413432	0.0375173	0.00104125	0.701727
REACTOME_NEGATIVE_REGULATION_OF_FGFR2_SIGNALING	-0.119577	-0.0110733	0.0118058	0.0317663	0.0484888	0.0474795	0.00123934	0.701036
DAIRKEE_CANCER_PRONE_RESPONSE_BPA_E2	-0.00296564	0.00463943	-0.0424891	0.0334872	0.0113636	0.0618345	-0.00327845	0.700824
PID_HDAC_CLASSI_PATHWAY	-0.0909228	-0.00567126	-0.0719915	0.0742042	0.0629374	0.0661109	0.0180158	0.699393
BIOCARTA_NO1_PATHWAY	-0.0128862	0.0117866	-0.12958	0.0845133	0.0380237	0.161944	-0.00896096	0.699033
PID_HIF2PATHWAY	-0.0316109	-0.0178208	-0.121813	0.0867725	0.0886255	0.181614	-0.0147576	0.698651
REACTOME_NEGATIVE_REGULATION_OF_FGFR3_SIGNALING	-0.130925	-0.0101232	0.0146536	0.0376073	0.0536094	0.0533205	0.00655384	0.69849
OUILLETTE_CLL_13Q14_DELETION_UP	-0.0738565	-0.0179376	0.0133968	-0.0398102	0.00399516	0.0343808	-0.0562652	0.697883
REACTOME_HOMOLOGY_DIRECTED_REPAIR	-0.0225385	0.0133664	0.0417156	-0.0327419	-0.0111689	0.112037	-0.00391743	0.697698
GARGALOVIC_RESPONSE_TO_OXIDIZED_PHOSPHOLIPIDS_GREEN_DN	-0.127026	-0.0320731	-0.0285313	0.135851	0.0287923	0.172415	-0.124296	0.696838
PID_IL4_2PATHWAY	-0.185181	0.05116	-0.199095	0.268162	0.130613	0.203551	0.0448283	0.696153
REACTOME_EPIGENETIC_REGULATION_OF_GENE_EXPRESSION	-0.0358084	-0.000185886	0.00774809	0.0491857	0.0134353	0.0473579	0.00935843	0.695289
BRUINS_UVC_RESPONSE_VIA_TP53_GROUP_C	-0.0869239	0.0272269	0.0268153	-0.0218006	-0.0864113	0.0720549	-0.0530271	0.695097
WP_HEPATITIS_C_AND_HEPATOCELLULAR_CARCINOMA	-0.0372533	0.00352466	-0.117303	0.104215	0.0322458	0.137921	-0.00827405	0.695081
HUANG_GATA2_TARGETS_DN	-0.0508594	0.0116634	-0.0657139	0.0355231	0.0395077	0.0433169	0.0345117	0.695033
KIM_ALL_DISORDERS_CALB1_CORR_UP	-0.00475006	-0.00585341	-0.00169095	0.00232303	-0.00660963	0.0363538	-0.0113365	0.694534
ZHU_CMV_24_HR_UP	-0.0708832	0.0189322	-0.0433626	0.078421	0.0396842	0.0468723	0.010836	0.693899
WHITFIELD_CELL_CYCLE_LITERATURE	0.00105388	0.118124	-0.0292223	0.0385532	-0.218522	0.591977	-0.15099	0.693579
BLANCO_MELO_INFLUENZA_A_INFECTION_A594_CELLS_DN	-0.0623623	-0.000880981	0.0223916	0.0324055	0.00814544	0.0383749	-0.0112871	0.692276
FEVR_CTNNB1_TARGETS_DN	-0.0118659	0.0121808	0.0299961	0.0153342	0.0244185	0.0855534	-0.0388207	0.692274
LI_WILMS_TUMOR_VS_FETAL_KIDNEY_1_DN	0.0511872	0.0675433	-0.0171452	0.00051572	0.12772	0.193302	0.000888538	0.692202
REACTOME_CELL_CYCLE_CHECKPOINTS	-0.0242222	0.0102729	0.0453133	0.0155611	-0.0202982	0.10047	-0.000984546	0.691818
DEBIASI_APOPTOSIS_BY_REOVIRUS_INFECTION_DN	-0.0147968	0.0195268	-0.0305024	-0.00411743	0.042017	0.0277342	-0.013808	0.691196
YAO_TEMPORAL_RESPONSE_TO_PROGESTERONE_CLUSTER_13	-0.0131036	0.00965583	-0.0478016	0.0263428	-0.0134854	0.0398053	-0.0028815	0.690963
PID_MYC_ACTIV_PATHWAY	-0.0177533	0.0145125	-0.0222347	-0.0152994	0.0578715	0.042823	0.00698121	0.688751
WP_GASTRIN_SIGNALING_PATHWAY	-0.0603775	-0.00809721	-0.0535136	0.0253834	0.0509943	0.0306425	-0.0226088	0.688698
WP_LEPTIN_SIGNALING_PATHWAY	-0.0495328	0.021853	-0.0482885	-0.0314372	0.0471957	0.01811	0.00706069	0.688662
WP_METABOLIC_REPROGRAMMING_IN_COLON_CANCER	-0.00863147	-0.00577945	0.00110003	0.0242871	-0.0160084	0.127487	-0.0446117	0.688029
JAZAG_TGFB1_SIGNALING_DN	-0.00352063	0.0230191	-0.0965977	0.00712886	-0.0581983	0.117784	-0.026919	0.687539
JIANG_HYPOXIA_NORMAL	-0.0188273	-0.00110638	-0.0740416	0.027097	0.0381208	0.0639181	-0.0110095	0.687384
MARTINEZ_RESPONSE_TO_TRABECTEDIN_DN	-0.0401271	-0.00195297	-0.0239627	-0.00898709	0.00809683	0.0073528	0.0185704	0.687266
REACTOME_RET_SIGNALING	-0.0265345	0.00530249	-0.00900179	-0.0616323	0.045963	0.129228	0.0676577	0.685469
REACTOME_RESOLUTION_OF_ABASIC_SITES_AP_SITES	0.0323602	0.0280488	-0.0764502	-0.113509	-0.0798894	0.474789	-0.0483534	0.685347
REACTOME_MITOCHONDRIAL_CALCIUM_ION_TRANSPORT	-0.00883314	-0.0206509	-0.0244651	-0.031912	-0.052639	0.247302	-0.0653779	0.68515
KEGG_GLYCOLYSIS_GLUCONEOGENESIS	-0.0271506	0.00786626	-0.0451889	0.062161	0.0720507	0.0899541	-0.0409642	0.684967
WANG_ADIPOGENIC_GENES_REPRESSED_BY_SIRT1	-0.0341297	-0.044489	-0.0547212	-0.0290583	0.0771391	0.174142	-0.0899293	0.684911
GOLDRATH_HOMEOSTATIC_PROLIFERATION	0.0115038	0.0125462	0.00216778	-0.00211616	0.0365675	0.0574497	0.000582618	0.684902
REACTOME_RESOLUTION_OF_AP_SITES_VIA_THE_MULTIPLE_NUCLEOTIDE_PATCH_REPLACEMENT_PATHWAY	0.0640459	0.0548788	-0.0493345	-0.0886354	-0.0466829	0.52462	-0.0236701	0.684654
YAO_TEMPORAL_RESPONSE_TO_PROGESTERONE_CLUSTER_11	-0.00336271	-0.0222744	0.00349937	0.0175139	0.020641	0.126042	0.00208361	0.684579
REACTOME_N_GLYCAN_TRIMMING_IN_THE_ER_AND_CALNEXIN_CALRETICULIN_CYCLE	-0.0494705	0.00345247	0.0219478	-0.0174938	-0.0034756	0.0206432	-0.0111465	0.68335
REACTOME_BIOLOGICAL_OXIDATIONS	-0.0345607	-0.00950614	-0.0713913	0.0225506	0.0100285	0.0607688	0.0372758	0.682633
BIDUS_METASTASIS_UP	-0.0345048	0.0156688	0.0238888	-0.0288207	0.0765247	0.0742177	-0.00821068	0.681762
BILANGES_RAPAMYCIN_SENSITIVE_VIA_TSC1_AND_TSC2	-0.0134217	-0.00965694	0.00246639	-0.014827	-0.0185806	0.0498876	-0.00295939	0.681664
KEGG_FRUCTOSE_AND_MANNOSE_METABOLISM	-0.0602866	-0.00767168	-0.0665837	0.138082	0.10386	0.178619	-0.0744609	0.681463
BOYAULT_LIVER_CANCER_SUBCLASS_G1_DN	-0.00275632	-0.00100608	-0.150951	0.00764364	-0.0700363	0.233774	0.0271751	0.681086
PID_HNF3B_PATHWAY	-0.0289818	0.0607791	-0.158317	0.0173936	0.00246479	0.0992096	0.04828	0.680344
BIOCARTA_STRESS_PATHWAY	-0.164457	-0.0150263	-0.122911	0.169478	0.014163	0.115937	0.0187188	0.680222
REACTOME_CA_DEPENDENT_EVENTS	-0.0412012	0.0031818	-0.0993064	0.0946942	0.0516804	0.106277	-0.00608144	0.679557
WP_SIGNAL_TRANSDUCTION_THROUGH_IL1R	-0.0994941	-0.020453	-0.172824	0.101414	0.0286644	0.110651	0.0150479	0.678698
REACTOME_NEGATIVE_EPIGENETIC_REGULATION_OF_RRNA_EXPRESSION	-0.0142073	0.00539352	-0.0116453	0.00244599	-0.0243582	0.0491976	0.0295118	0.678393
BUFFA_HYPOXIA_METAGENE	-0.0126593	-0.0079642	-0.0612268	-0.0149006	0.0432521	0.0705603	-0.0409988	0.678181
SMIRNOV_RESPONSE_TO_IR_6HR_DN	-0.0774494	0.00534929	-0.0891354	0.125632	0.0312679	0.0987698	-0.04214	0.678052
REACTOME_ANTIGEN_ACTIVATES_B_CELL_RECEPTOR_BCR_LEADING_TO_GENERATION_OF_SECOND_MESSENGERS	-0.0282565	-0.0279903	-0.0808297	-0.039058	0.0158304	0.0701977	0.0117288	0.677884
KEGG_PENTOSE_PHOSPHATE_PATHWAY	-0.00879531	-0.0348048	-0.0337041	0.0112638	0.00451045	0.184613	-0.0697748	0.677462
WP_IL2_SIGNALING_PATHWAY	-0.125285	0.00837683	-0.0346918	0.0627967	0.0235109	0.0332457	0.0388798	0.675963
REACTOME_HDR_THROUGH_HOMOLOGOUS_RECOMBINATION_HRR	-0.0716734	0.00809225	0.0591095	0.00337649	-0.0858158	0.157365	-0.0176457	0.675527
PID_P75_NTR_PATHWAY	-0.0257472	0.0211787	-0.059002	0.0467565	0.019157	0.0378263	-0.00518854	0.675027
JAZAERI_BREAST_CANCER_BRCA1_VS_BRCA2_UP	0.0016544	0.00637334	-0.0328652	0.0191805	0.040847	0.068291	-0.0283154	0.674555
REACTOME_RESOLUTION_OF_SISTER_CHROMATID_COHESION	-0.0827337	0.0873203	-0.0348383	0.0164563	0.10248	0.0299697	0.0127456	0.67343
WP_BRAINDERIVED_NEUROTROPHIC_FACTOR_BDNF_SIGNALING_PATHWAY	-0.0460975	0.0025224	-0.0411772	0.0287897	0.0198639	0.0158295	0.00738931	0.673278
LY_AGING_OLD_DN	-0.0152019	0.0313035	0.00291173	0.119765	0.0502101	0.109336	-8.57862e-05	0.673224
REACTOME_OXIDATIVE_STRESS_INDUCED_SENESCENCE	-0.0882253	-0.0105773	0.00107625	0.0351139	0.0509632	0.0417175	0.0172944	0.672626
NAKAMURA_METASTASIS_MODEL_UP	-0.186643	0.00386277	-0.125469	0.0929146	0.166452	0.087935	0.0372983	0.670853
REACTOME_BASE_EXCISION_REPAIR	0.0191925	0.02539	-0.0557516	-0.142287	-0.103953	0.450973	-0.0527451	0.670662
PID_PTP1B_PATHWAY	-0.0375141	0.0116243	-0.0769985	0.106811	0.0798268	0.109779	0.00777139	0.670618
CAFFAREL_RESPONSE_TO_THC_24HR_5_UP	-0.0273056	0.0120709	-0.0160429	-0.00665298	0.0404722	0.0289329	0.0326867	0.670444
BROWNE_HCMV_INFECTION_8HR_UP	-0.136954	0.0103106	-0.00770085	0.089343	0.0394072	0.0444537	-0.0332872	0.669582
THILLAINADESAN_ZNF217_TARGETS_UP	-0.00612565	-0.024016	-0.0601721	-0.0555354	-0.0214183	0.127484	-0.0518885	0.669524
DACOSTA_UV_RESPONSE_VIA_ERCC3_TTD_UP	-0.0733076	0.0116765	-0.0180435	0.0957048	0.0356205	0.0599933	-0.020493	0.668731
MOOTHA_PGC	-0.00396319	-0.0171245	-0.0268211	0.0314267	0.00189856	0.0864682	-0.0113849	0.668017
RIZ_ERYTHROID_DIFFERENTIATION_12HR	-0.110415	0.0274932	-0.0860328	0.0313814	0.0155034	0.0135612	0.0448598	0.667984
REACTOME_TAK1_ACTIVATES_NFKB_BY_PHOSPHORYLATION_AND_ACTIVATION_OF_IKKS_COMPLEX	-0.104442	-0.00857374	-0.0391492	0.0394045	0.041005	0.0259861	0.0240602	0.667706
MORI_MATURE_B_LYMPHOCYTE_DN	0.00199402	0.000964517	0.0269935	0.0385221	0.00712946	0.111404	-0.0113963	0.667237
HOLLEMAN_ASPARAGINASE_RESISTANCE_ALL_DN	-0.0874109	0.0195592	0.0477204	-0.00658337	-0.0245721	0.0459965	0.00658953	0.667178
GENTILE_UV_RESPONSE_CLUSTER_D7	-0.135665	0.0284633	0.0135053	0.0406154	0.072118	0.0370707	-0.0663707	0.666258
JOHNSTONE_PARVB_TARGETS_3_DN	0.0100886	0.0170399	-0.0145696	0.00515472	0.0254743	0.0712251	-0.038115	0.665853
SANA_RESPONSE_TO_IFNG_DN	0.0108542	0.014892	-0.0248702	0.00734041	0.0184703	0.0398513	0.00366278	0.665225
REACTOME_COPI_DEPENDENT_GOLGI_TO_ER_RETROGRADE_TRAFFIC	0.007962	0.0408235	-0.0441777	-0.012109	0.0358573	0.0543883	0.0225519	0.664367
NIKOLSKY_BREAST_CANCER_17Q21_Q25_AMPLICON	-0.021115	0.00321845	0.036321	0.0345451	0.00267222	0.0963628	-0.0380487	0.664009
QI_HYPOXIA_TARGETS_OF_HIF1A_AND_FOXA2	-0.118791	-0.0100415	0.0126954	0.0523479	-0.00168688	0.0495448	0.029937	0.663651
BIOCARTA_IL1R_PATHWAY	-0.096098	-0.0216952	-0.170876	0.10481	0.0322876	0.108892	0.0190909	0.663424
WP_FACTORS_AND_PATHWAYS_AFFECTING_INSULINLIKE_GROWTH_FACTOR_IGF1AKT_SIGNALING	-0.0546994	0.0389559	-0.109892	-0.0559967	0.0394257	0.0412466	0.037315	0.663229
KIM_MYC_AMPLIFICATION_TARGETS_UP	-0.00403046	-0.0184447	-0.0026063	-0.00187569	-0.0282734	0.144891	-0.0258035	0.663134
WP_CILIARY_LANDSCAPE	-0.00662455	0.00803934	0.00670668	0.00164276	0.00312487	0.0257659	-0.0235068	0.662934
RASHI_RESPONSE_TO_IONIZING_RADIATION_1	-0.118072	-0.021325	-0.0277587	0.0392676	0.0149804	0.0338682	0.0373743	0.662121
FISCHER_G1_S_CELL_CYCLE	-0.0684636	0.00360797	0.0308553	0.0560253	-0.049153	0.0886169	-0.0324195	0.661629
HIRSCH_CELLULAR_TRANSFORMATION_SIGNATURE_UP	-0.053446	-0.0179764	-0.0786945	0.0520148	0.0911825	0.0852106	-0.00581362	0.66139
KIM_BIPOLAR_DISORDER_OLIGODENDROCYTE_DENSITY_CORR_UP	0.00410184	0.00496868	-0.00907397	0.00110796	0.00506902	0.0154586	0.00426188	0.661092
REACTOME_PROCESSING_OF_CAPPED_INTRON_CONTAINING_PRE_MRNA	-0.0624538	0.0295372	0.032619	0.0152909	0.0270002	0.023761	0.00152857	0.660989
REACTOME_TGF_BETA_RECEPTOR_SIGNALING_ACTIVATES_SMADS	-0.0730217	0.020535	-0.0506196	0.0568541	0.0462956	0.0260309	0.0141756	0.660921
YAO_TEMPORAL_RESPONSE_TO_PROGESTERONE_CLUSTER_15	0.0616823	0.117373	0.0907121	0.0240409	-0.0327149	0.318602	-0.00216509	0.659653
WU_APOPTOSIS_BY_CDKN1A_VIA_TP53	-0.0424031	0.0534544	-0.0216788	0.12409	0.0583833	0.0865179	-0.0347119	0.659302
REACTOME_RRNA_PROCESSING	-0.00221821	0.00148636	0.00441267	0.000369586	-0.00676339	0.0172916	0.00126248	0.658163
RAMASWAMY_METASTASIS_UP	0.0045195	0.0153759	0.00991471	0.00252087	0.0218641	0.0749128	-0.0401795	0.658125
IVANOVA_HEMATOPOIESIS_INTERMEDIATE_PROGENITOR	0.0160695	0.00495738	-0.0193544	0.0134774	-0.0179695	0.123187	-0.025185	0.656915
REACTOME_RNA_POLYMERASE_III_TRANSCRIPTION_TERMINATION	-0.0839796	0.0377129	-0.00762827	0.00969168	0.0156189	0.00897071	0.0368878	0.65685
BENPORATH_ES_CORE_NINE_CORRELATED	-0.110906	-0.0323034	-0.01434	0.078731	0.004652	0.0663615	0.0177044	0.656071
BILANGES_RAPAMYCIN_SENSITIVE_GENES	0.000432591	0.018262	-0.0238816	0.018851	0.00723549	0.0237268	-0.00846396	0.655802
BHATTACHARYA_EMBRYONIC_STEM_CELL	-0.0044482	0.00195906	0.0177901	-0.014245	0.0593428	0.0846931	-0.00725545	0.655388
PID_HEDGEHOG_GLI_PATHWAY	-0.0230441	-0.00470103	-0.0594082	-0.0818317	-0.0155923	0.0758018	0.0164427	0.654448
WANG_NEOPLASTIC_TRANSFORMATION_BY_CCND1_MYC	-0.0261673	-0.0243344	-0.0595643	-0.0360398	0.0245149	0.17583	0.106037	0.65443
REACTOME_CONSTITUTIVE_SIGNALING_BY_AKT1_E17K_IN_CANCER	-0.316064	0.057345	-0.265666	0.141056	-0.193031	0.153867	0.199416	0.654404
WP_TNF_ALPHA_SIGNALING_PATHWAY	-0.0781788	0.0254267	-0.0336616	0.0358473	0.00896108	0.00268518	0.0105334	0.653699
GARCIA_TARGETS_OF_FLI1_AND_DAX1_DN	-0.0352629	0.0283551	0.0316784	-0.0426741	-0.0529802	0.0836894	-0.0238338	0.652478
CHANDRAN_METASTASIS_DN	-0.0448492	0.0122568	-0.0781404	0.0231414	-0.00265127	0.0180352	0.0126661	0.65241
REACTOME_RNA_POLYMERASE_I_TRANSCRIPTION	-0.104607	0.0390101	0.00932288	0.00287801	0.0256688	0.0155827	0.041019	0.6523
HASLINGER_B_CLL_WITH_17P13_DELETION	-0.0438802	0.0154249	0.00855344	0.0694503	0.00957857	0.0478845	-0.0152734	0.651685
REACTOME_TERMINATION_OF_TRANSLESION_DNA_SYNTHESIS	-0.0752234	0.000268224	0.073893	0.0901195	0.0469239	0.137572	-0.0497819	0.65129
PAPASPYRIDONOS_UNSTABLE_ATEROSCLEROTIC_PLAQUE_UP	-0.0820593	-0.00660296	-0.0837045	0.0559967	0.059652	0.0440259	0.019568	0.65108
ANDERSEN_LIVER_CANCER_KRT19_DN	-0.0520812	-0.0226748	-0.0327492	0.122704	0.0614489	0.132212	-0.0188713	0.650839
SHAFFER_IRF4_TARGETS_IN_MYELOMA_VS_MATURE_B_LYMPHOCYTE	-0.0284941	0.000373408	-0.068473	0.0341646	0.0328425	0.0448975	0.0155443	0.650148
REACTOME_METABOLISM_OF_CARBOHYDRATES	-0.00536753	-0.0121287	-0.0334272	0.0468956	0.0272463	0.108217	-0.0519832	0.649852
KEGG_MISMATCH_REPAIR	-0.0238911	-0.0197647	0.124504	-0.00516026	0.107411	0.468106	-0.161636	0.649554
MEISSNER_BRAIN_HCP_WITH_H3K4ME2_AND_H3K27ME3	-0.280842	-0.0990542	-0.429763	0.37928	-0.330377	0.479958	-0.311138	0.648294
DIRMEIER_LMP1_RESPONSE_LATE_UP	-0.069414	-0.0038063	-0.0094969	0.0889925	0.0246802	0.0643724	-0.0355749	0.647644
LEE_CALORIE_RESTRICTION_NEOCORTEX_UP	-0.048166	0.0294113	-0.0612947	0.0497794	0.0357829	0.0361722	0.0440378	0.647467
KYNG_ENVIRONMENTAL_STRESS_RESPONSE_UP	0.00290262	0.000446862	-0.0430928	-0.00426796	0.0440694	0.06293	0.000947169	0.647209
HOLLEMAN_VINCRISTINE_RESISTANCE_ALL_UP	-0.0207882	-0.00716682	-0.0335525	-0.0795725	0.000151457	0.115726	-0.106187	0.647182
CAIRO_PML_TARGETS_BOUND_BY_MYC_UP	0.00762316	0.0107535	-0.0346803	-0.0143168	0.0358582	0.0550153	0.00308684	0.646807
IRITANI_MAD1_TARGETS_DN	-0.00181161	0.00252524	0.023203	-0.0175835	-0.0166344	0.10202	-0.0125094	0.646402
BIOCARTA_KERATINOCYTE_PATHWAY	-0.106275	0.0355825	-0.107797	0.0793637	0.0402175	0.028068	0.0214854	0.645732
REACTOME_G0_AND_EARLY_G1	-0.031366	-0.0133375	0.0240037	0.0175188	-0.143449	0.333803	-0.0563387	0.645129
REACTOME_GLUCOSE_METABOLISM	-0.024589	-0.00617763	-0.0133246	0.0495339	0.0467163	0.0757486	-0.0490492	0.645004
REACTOME_RNA_POLYMERASE_III_TRANSCRIPTION	-0.081109	0.0479906	-0.0115177	0.0345164	0.0152856	0.0095157	0.0315716	0.644784
HOWLIN_PUBERTAL_MAMMARY_GLAND	-0.0975363	-0.0204422	-0.100778	0.18724	0.0294261	0.153107	-0.0216575	0.644084
BRUINS_UVC_RESPONSE_LATE	0.00219922	0.00684157	-0.0166008	0.00342717	0.0106249	0.016243	-0.00266515	0.643574
RICKMAN_METASTASIS_UP	0.000655681	0.0168755	-0.0354586	-0.0292242	-0.0469431	0.0756401	-0.0378531	0.643556
REACTOME_FCGR3A_MEDIATED_IL10_SYNTHESIS	-0.0220939	-0.00085086	-0.067932	0.0633179	0.0399719	0.0718386	-0.0228518	0.643455
ROVERSI_GLIOMA_COPY_NUMBER_UP	-0.0462206	0.0409007	-0.0642411	0.0323453	0.0343078	0.0127844	-0.0043908	0.642159
MELLMAN_TUT1_TARGETS_DN	-0.0679424	0.00934358	-0.0224293	-0.00451778	0.0361103	-0.00407202	-0.0204727	0.642141
SAFFORD_T_LYMPHOCYTE_ANERGY	-0.173022	-0.0691824	-0.0774557	0.0931908	0.000170374	0.0669531	0.0225433	0.641003
ZHAN_MULTIPLE_MYELOMA_CD1_UP	-0.0489287	-0.096214	-0.0395125	0.0108249	0.0346037	0.17585	-0.0234466	0.640932
XIE_LT_HSC_S1PR3_OE_UP	-0.208128	-0.0253608	-0.313595	-0.0573257	-0.198459	0.251074	0.243645	0.640632
TAKEDA_TARGETS_OF_NUP98_HOXA9_FUSION_6HR_UP	-0.041627	-0.0574451	-0.125727	-0.0347674	-0.0881746	0.150968	0.0258046	0.640378
REACTOME_DNA_DOUBLE_STRAND_BREAK_REPAIR	-0.0303534	-0.00404604	0.0547142	-0.00502411	0.0202853	0.0853179	-0.00482824	0.640347
PID_HIV_NEF_PATHWAY	-0.0953521	-0.0509237	-0.0122248	0.176239	0.0130128	0.197383	-0.0102275	0.639986
KEGG_PYRUVATE_METABOLISM	-0.00143077	0.000953892	-0.0123061	-0.0347235	0.0308498	0.117671	-0.0781926	0.639232
WP_IL3_SIGNALING_PATHWAY	-0.074612	0.0567086	-0.0488488	0.075096	0.0730013	0.0323053	0.0293746	0.638993
PID_HDAC_CLASSII_PATHWAY	-0.04635	0.0395043	-0.0211497	0.0404055	0.0675122	0.0242641	-0.00939733	0.638721
PID_IL8_CXCR1_PATHWAY	-0.002164	0.0379642	-0.0305191	-0.0637358	-0.0329018	0.0728283	-0.00583376	0.638673
GAZDA_DIAMOND_BLACKFAN_ANEMIA_PROGENITOR_UP	-0.0278384	-0.00456509	-0.01663	-0.00740586	0.0174532	0.00801881	0.0124103	0.63792
WP_ONCOSTATIN_M_SIGNALING_PATHWAY	-0.112713	0.00414323	-0.0624393	0.104706	0.0570944	0.0521605	0.0262167	0.63773
HOLLERN_SOLID_NODULAR_BREAST_TUMOR_DN	-0.0192442	0.0303835	-0.127765	0.092825	0.0701036	0.111506	0.0239226	0.637484
REACTOME_PHASE_0_RAPID_DEPOLARISATION	-0.000509949	0.00553838	-0.0888537	0.0241254	0.00120939	0.0730627	-0.0157364	0.637267
WONG_EMBRYONIC_STEM_CELL_CORE	0.015527	0.0253467	0.000584329	0.0621855	-0.0163709	0.104733	0.00272087	0.637033
REACTOME_SELENOAMINO_ACID_METABOLISM	-0.000120202	-0.00175385	-0.000698297	0.00190388	-0.000334897	0.00771804	0.00085496	0.63531
KEGG_TRYPTOPHAN_METABOLISM	-0.122821	0.048834	0.0115635	-0.0612038	0.0347309	0.00746305	0.00796533	0.635239
LEE_BMP2_TARGETS_DN	0.00586495	0.00692857	0.02825	-0.0197759	0.0256107	0.100748	-0.0208234	0.634847
CAMPS_COLON_CANCER_COPY_NUMBER_UP	-0.0261637	-0.0100727	-0.0156437	0.0640828	-0.029862	0.0847899	-0.000734041	0.634727
RIZKI_TUMOR_INVASIVENESS_2D_DN	-0.0498423	0.0180618	0.022177	-0.00459419	0.00443854	0.0137307	-0.0313618	0.634296
FUJII_YBX1_TARGETS_DN	0.0491635	0.0760353	0.00705178	0.0864463	0.000540222	0.174921	-0.0370435	0.633535
REACTOME_MRNA_SPLICING	-0.0637735	0.031721	0.0441746	0.0135814	0.0169307	0.0277779	0.00204507	0.633504
ELVIDGE_HIF1A_TARGETS_DN	-0.0739481	-0.0160696	-0.244206	0.0944584	0.222291	0.212215	-0.0264751	0.633308
REACTOME_GLUTATHIONE_CONJUGATION	-0.0480485	-0.0333777	-0.148367	0.0998665	-0.0221927	0.152905	0.0324519	0.633224
REACTOME_DNA_DAMAGE_TELOMERE_STRESS_INDUCED_SENESCENCE	-0.16672	-0.0952388	0.0263513	-0.0742347	0.00571703	0.117948	0.0415839	0.632565
GRADE_COLON_AND_RECTAL_CANCER_UP	0.00118175	0.00334945	-0.00689408	0.00681724	-0.0301281	0.0623634	-0.00332252	0.6325
KEGG_SPLICEOSOME	-0.0707286	0.0315735	0.0343927	0.00261718	0.0128412	0.0166646	-0.00634226	0.632255
SWEET_KRAS_TARGETS_DN	-0.0287596	-0.00371095	-0.0501461	0.0205982	0.116984	0.0902334	0.0173837	0.632155
WP_TCELL_ANTIGEN_RECEPTOR_TCR_PATHWAY_DURING_STAPHYLOCOCCUS_AUREUS_INFECTION	-0.109362	0.0027318	-0.0879784	0.0593212	0.0448176	0.0393229	0.063053	0.631521
SIG_CD40PATHWAYMAP	-0.335431	0.0334247	-0.178869	0.169607	0.0108541	0.0174841	0.0519575	0.62965
ZHOU_TNF_SIGNALING_30MIN	-0.0906747	0.00358162	-0.0501338	0.0722777	0.0116757	0.0278855	0.0248813	0.628557
REACTOME_TRANSCRIPTION_OF_THE_HIV_GENOME	-0.0276064	0.0495221	-0.00196203	0.00570529	0.0255687	0.0219437	0.0482352	0.628076
REACTOME_POSITIVE_EPIGENETIC_REGULATION_OF_RRNA_EXPRESSION	-0.0809655	0.0175998	0.0147691	0.0370524	0.0323093	0.0243594	0.0322242	0.627926
JIANG_AGING_CEREBRAL_CORTEX_UP	-0.0350754	0.0109873	-0.0196796	0.0468543	0.0179007	0.0201831	0.00295137	0.627682
SCHUHMACHER_MYC_TARGETS_UP	-0.00675294	-0.0152416	0.0534861	-0.0584375	0.00416019	0.21303	-0.0128578	0.626024
REACTOME_DUAL_INCISION_IN_GG_NER	-0.0399987	0.0154232	0.026974	-0.0560487	0.0620079	0.0667152	0.0138575	0.625875
RATTENBACHER_BOUND_BY_CELF1	-0.0319822	0.0123249	-0.0614801	-0.000850027	0.0190932	0.0156301	0.0235714	0.623683
GAUSSMANN_MLL_AF4_FUSION_TARGETS_G_DN	-0.143113	0.00742148	0.0183279	-0.124401	-0.115685	0.0435273	-0.0278364	0.623589
REACTOME_INTERLEUKIN_17_SIGNALING	-0.0556562	-0.022607	-0.00571938	0.00712498	-0.0297853	0.0324407	0.0240169	0.62304
REACTOME_SYNTHESIS_OF_IP3_AND_IP4_IN_THE_CYTOSOL	-0.00840713	0.000830448	-0.028503	0.00187731	-0.00837011	0.0158166	0.0109621	0.619688
REACTOME_CRISTAE_FORMATION	-0.0112367	0.0099417	-0.0123244	-0.053713	-0.0245395	0.055202	0.00999784	0.619595
PID_AR_NONGENOMIC_PATHWAY	-0.0570758	0.0272184	-0.026029	-0.0695209	0.0171016	0.0320799	0.0488678	0.619271
REACTOME_SIGNALING_BY_INTERLEUKINS	-0.0322122	-0.00349708	-0.0300485	0.0393394	0.0470986	0.0367614	0.0179936	0.619247
WINTER_HYPOXIA_UP	-0.00197723	-0.028689	-0.0328538	0.000291976	0.00496823	0.0886786	-0.0441722	0.618743
REACTOME_HSP90_CHAPERONE_CYCLE_FOR_STEROID_HORMONE_RECEPTORS_SHR	-0.0442942	0.000652718	0.0205995	0.0157019	-0.0117175	0.0232616	0.00838536	0.615929
REACTOME_INFECTIOUS_DISEASE	-0.0158843	0.00278642	0.00353271	0.00896074	0.0061082	0.00602668	0.00756896	0.615755
WP_DNA_MISMATCH_REPAIR	0.032675	0.0256754	0.0938132	-0.137167	-0.0257655	0.510666	-0.138746	0.614924
MARTORIATI_MDM4_TARGETS_NEUROEPITHELIUM_UP	-0.0143559	-0.027401	-0.0568704	-0.0102828	0.10725	0.125725	-0.0487429	0.614224
BYSTRYKH_HEMATOPOIESIS_STEM_CELL_AND_BRAIN_QTL_TRANS	-0.00696518	-0.0152375	-0.0211571	0.0310144	0.0279601	0.0534753	0.00577129	0.614214
WP_MITOCHONDRIAL_CIV_ASSEMBLY	0.00418538	-0.00197142	-0.0300077	0.0115357	0.00282362	0.0365902	-0.00728573	0.612987
WP_PARKINUBIQUITIN_PROTEASOMAL_SYSTEM_PATHWAY	-0.00719513	-0.0186488	-0.00323706	0.000430012	-0.0593943	0.14073	0.0101797	0.612526
BENPORATH_MYC_TARGETS_WITH_EBOX	-0.0145515	0.00801233	-0.0171191	0.0243572	0.0141102	0.0137899	0.0118965	0.612222
PID_IL1_PATHWAY	-0.0855804	-0.00367918	-0.0791143	0.0245239	0.0500864	0.0165867	0.0313085	0.611457
NEMETH_INFLAMMATORY_RESPONSE_LPS_DN	-0.132361	0.00132449	-0.0771565	0.151401	-0.0130392	0.0705619	0.0239883	0.611448
LANDIS_ERBB2_BREAST_PRENEOPLASTIC_DN	0.0093643	-0.00783151	-0.0232161	0.056187	0.000783709	0.13553	-0.0567365	0.610782
REACTOME_TRANSFERRIN_ENDOCYTOSIS_AND_RECYCLING	-0.0949123	-0.0146343	-0.0110023	0.0577083	-0.0206364	0.0346949	0.0252279	0.6107
REACTOME_CARGO_CONCENTRATION_IN_THE_ER	0.0221159	0.0133292	-0.115527	-0.0865501	0.011941	0.142095	-0.0381382	0.610119
WANG_SMARCE1_TARGETS_DN	-0.0354584	0.0120238	0.0115437	-0.00742326	0.0628892	0.0316571	-0.0131519	0.608629
DARWICHE_SKIN_TUMOR_PROMOTER_DN	-0.0252419	-0.0107126	-0.019372	0.037215	0.0368863	0.0407061	-0.0278197	0.60705
QI_HYPOXIA	-0.0675326	-0.0760326	-0.0504975	-0.0442361	0.199288	0.212595	-0.086107	0.606853
ONKEN_UVEAL_MELANOMA_DN	-0.0187987	-0.00117737	-0.0177234	0.0138864	0.024605	0.01155	-0.00098538	0.606469
PID_PRL_SIGNALING_EVENTS_PATHWAY	-0.0251506	0.00105618	-0.0571614	-0.026607	0.0334484	0.0249678	0.0177835	0.604998
DOANE_RESPONSE_TO_ANDROGEN_DN	-0.0231966	-0.00503635	-0.0379084	0.033066	0.00221349	0.0203667	-0.0121034	0.604275
REACTOME_RNA_POLYMERASE_I_TRANSCRIPTION_INITIATION	-0.103371	0.0142584	0.0255257	-0.0264263	0.0131698	0.0167609	0.0325487	0.604173
TARTE_PLASMA_CELL_VS_PLASMABLAST_DN	0.0227451	0.0242824	0.0137725	0.0277706	-0.0218675	0.105132	-0.0098705	0.603809
LANDIS_ERBB2_BREAST_TUMORS_324_DN	-0.0324812	0.0145863	-0.0536627	-0.0237949	0.0394078	0.0144313	0.0159582	0.603679
CHICAS_RB1_TARGETS_SENESCENT	-0.017407	0.0119233	-0.00688386	0.0497512	0.0437258	0.0340668	0.00833057	0.602772
REACTOME_CLASS_I_MHC_MEDIATED_ANTIGEN_PROCESSING_PRESENTATION	-0.0232828	-0.0083301	0.0237289	0.000606548	0.029279	0.0374468	0.000838243	0.602156
MARTORIATI_MDM4_TARGETS_FETAL_LIVER_UP	-0.0249071	-0.0191013	-0.046928	-0.0398483	0.0955549	0.08415	-0.0234576	0.601514
PID_P38_ALPHA_BETA_DOWNSTREAM_PATHWAY	-0.0447812	-0.00927475	-0.0661382	0.0666507	0.0834836	0.066971	-0.0377995	0.60049
WP_IL4_SIGNALING_PATHWAY	-0.145175	0.0198577	-0.164267	0.203423	0.113983	0.100648	0.0180432	0.600162
IWANAGA_CARCINOGENESIS_BY_KRAS_PTEN_UP	-0.0110894	0.0215404	-0.0834828	0.0156125	0.0873775	0.0629864	-0.0159076	0.599652
SCHLINGEMANN_SKIN_CARCINOGENESIS_TPA_DN	-0.0611694	0.0318008	-0.0181479	0.0602836	0.0506752	0.0275281	-0.0577151	0.59961
REACTOME_THE_PHOTOTRANSDUCTION_CASCADE	-0.00071211	-0.00567998	-0.0379787	-0.0608173	-0.0032619	0.0735741	0.00833109	0.598633
ONO_FOXP3_TARGETS_DN	-0.0164813	-0.0857132	-0.0823473	-0.0563484	-0.00915308	0.161249	-0.0233587	0.598431
AGUIRRE_PANCREATIC_CANCER_COPY_NUMBER_UP	-0.00165415	0.00853451	0.021764	-0.00294204	-0.0245437	0.0715764	-0.0230005	0.598007
MULLIGAN_NTF3_SIGNALING_VIA_INSR_AND_IGF1R_UP	0.0286072	-0.00734265	-0.0204032	-0.0427515	0.0734997	0.164423	0.0232196	0.597766
LASTOWSKA_NEUROBLASTOMA_COPY_NUMBER_UP	-0.0203906	-0.0109565	0.0363076	0.0407989	-0.0386437	0.11816	-0.012345	0.597591
WP_APOPTOSIS	-0.106464	0.0109832	-0.101147	0.120815	0.0181119	0.049917	0.0378961	0.597331
REACTOME_M_PHASE	-0.00345257	0.00215184	0.0246534	0.0198497	-0.00469565	0.0509566	-0.00376436	0.597116
STARK_HYPPOCAMPUS_22Q11_DELETION_UP	-0.0817232	-0.00664773	0.0610204	-0.0606806	-0.11214	0.137279	-0.0710705	0.596898
BIOCARTA_PYK2_PATHWAY	-0.066701	0.0192796	-0.015005	-0.0195166	0.0276576	0.0176547	0.057629	0.596838
AMIT_EGF_RESPONSE_60_HELA	-0.135045	0.0198935	-0.161893	0.136041	0.0699498	0.0487083	0.0120011	0.596752
SCHLOSSER_MYC_AND_SERUM_RESPONSE_SYNERGY	0.00836278	0.00763705	-0.00806473	-0.0422978	0.0192265	0.0724964	0.01772	0.596722
SHAFFER_IRF4_TARGETS_IN_ACTIVATED_B_LYMPHOCYTE	0.0203082	-0.00411681	-0.0361658	0.00731478	0.0157496	0.108629	-0.0525835	0.596481
HWANG_PROSTATE_CANCER_MARKERS	-0.0472338	-0.0126069	-0.0778283	0.0100855	0.0508305	0.023858	0.00210294	0.596135
LIAN_LIPA_TARGETS_3M	0.0114618	0.1296	-0.288387	0.109663	0.0872779	0.180532	-0.0664695	0.595564
FLOTHO_PEDIATRIC_ALL_THERAPY_RESPONSE_UP	-0.00589589	-0.00367619	-0.015594	0.00472145	-0.00486204	0.00747985	0.00136954	0.595275
WP_AMINO_ACID_METABOLISM	-0.00311275	-0.0455521	0.0285162	-0.0215343	-0.0311705	0.224279	-0.048087	0.595176
WEI_MYCN_TARGETS_WITH_E_BOX	0.0134749	-0.00335172	0.0139833	-0.0171257	-0.00616115	0.104862	-0.00682439	0.594738
CHIBA_RESPONSE_TO_TSA	-0.0879726	-0.00257365	-0.0446455	0.0298908	0.0367341	0.00664263	0.0278819	0.592659
ZWANG_EGF_PERSISTENTLY_DN	-0.0320156	-0.113289	-0.0661462	-0.233054	-0.030783	0.348762	-0.0610456	0.592567
REACTOME_TP53_REGULATES_TRANSCRIPTION_OF_DNA_REPAIR_GENES	-0.0471728	0.0437916	-0.0398295	0.0569275	0.0642232	0.0275447	0.0425716	0.592458
LY_AGING_PREMATURE_DN	-0.0755964	0.0677478	-0.0515329	0.079843	0.170231	0.0602247	0.0194043	0.592144
ZHANG_PROLIFERATING_VS_QUIESCENT	-0.0134808	-0.00445731	0.00336133	0.0025703	0.0419629	0.0315246	-0.00479077	0.592121
REACTOME_TOLL_LIKE_RECEPTOR_9_TLR9_CASCADE	-0.0862302	-0.00828059	-0.00521664	0.0327902	0.034978	0.0155064	0.0182542	0.592079
GREENBAUM_E2A_TARGETS_UP	0.028227	-0.0216481	-0.0655325	0.0514977	0.0389872	0.242251	-0.138303	0.590434
REACTOME_RNA_POLYMERASE_I_PROMOTER_ESCAPE	-0.114239	0.0299466	-0.00424483	-0.0102081	0.0403057	0.00957838	0.0604785	0.590198
REACTOME_ATF4_ACTIVATES_GENES_IN_RESPONSE_TO_ENDOPLASMIC_RETICULUM_STRESS	-0.0797725	-0.0153728	-0.0786858	0.00687462	0.0516233	0.010135	0.0190326	0.589332
REACTOME_TRANSLESION_SYNTHESIS_BY_Y_FAMILY_DNA_POLYMERASES_BYPASSES_LESIONS_ON_DNA_TEMPLATE	-0.0617711	-0.00801575	0.065279	0.0702991	0.00163378	0.100809	-0.0353276	0.589106
HESS_TARGETS_OF_HOXA9_AND_MEIS1_UP	0.056344	0.051194	0.0462589	0.0635771	0.0523925	0.145799	-0.017433	0.588879
SESTO_RESPONSE_TO_UV_C0	-0.0638238	0.00907569	-0.0417041	0.039224	0.013011	0.00848947	0.0285948	0.587958
KASLER_HDAC7_TARGETS_2_DN	-0.234772	-0.00358376	-0.194622	0.137355	0.121304	0.0526432	0.0958547	0.587958
BIOCARTA_VIP_PATHWAY	-0.10644	0.00881894	-0.171488	0.141665	0.0900646	0.0772472	0.0165584	0.587248
ZHU_CMV_ALL_UP	-0.0907424	0.0284282	-0.0581109	0.106143	0.0537744	0.031499	0.0120116	0.586666
ABRAMSON_INTERACT_WITH_AIRE	-0.0462882	0.0438788	0.0206803	0.147465	0.0228309	0.0938426	-0.0209339	0.586607
ZHANG_RESPONSE_TO_IKK_INHIBITOR_AND_TNF_DN	-0.132112	0.00584265	-0.0482945	-0.00130052	0.195664	0.060479	-0.00331831	0.586425
JEPSEN_SMRT_TARGETS	-0.0650767	-0.0169856	-0.212758	0.0806369	0.117509	0.116461	0.0219727	0.586112
HADDAD_T_LYMPHOCYTE_AND_NK_PROGENITOR_DN	-0.010035	-0.000797719	-0.0626079	-0.0978691	-0.0420637	0.0874338	0.00620184	0.585892
RUAN_RESPONSE_TO_TROGLITAZONE_UP	-0.0166735	-0.0248698	-0.0285791	-0.136026	-0.104517	0.229875	0.0186613	0.585615
LEE_LIVER_CANCER_ACOX1_DN	-0.122708	0.00441167	-0.114994	0.0576775	-0.00781476	0.0835258	0.155918	0.585601
TIEN_INTESTINE_PROBIOTICS_24HR_UP	0.0189163	0.025372	0.0077191	-0.0107501	-0.0204411	0.0784016	-0.0113725	0.584994
LANDIS_ERBB2_BREAST_TUMORS_65_DN	-0.120352	0.0293141	-0.244084	0.0132043	0.0785632	0.0255604	0.0286212	0.584734
CHIANG_LIVER_CANCER_SUBCLASS_POLYSOMY7_DN	-0.141004	0.112992	-0.243638	0.105255	0.12252	0.026306	-0.0946427	0.584099
REACTOME_G_BETA_GAMMA_SIGNALLING_THROUGH_PI3KGAMMA	-0.077704	0.044373	-0.0313176	-0.0330599	0.0965644	0.0154791	0.0196445	0.583951
REACTOME_DEACTIVATION_OF_THE_BETA_CATENIN_TRANSACTIVATING_COMPLEX	-0.069233	-0.0138571	-0.0159998	0.00494261	0.0217483	0.00514936	0.0207605	0.583887
PID_HIF1_TFPATHWAY	-0.022656	-0.00891847	-0.107351	0.057807	0.129468	0.110101	-0.0165587	0.583741
DEN_INTERACT_WITH_LCA5	-0.0327083	0.00626305	0.000495353	0.0433518	0.0332314	0.0228775	-0.00768879	0.583708
BROWNE_HCMV_INFECTION_30MIN_UP	-0.172321	0.0112723	-0.0979512	0.206143	0.0403524	0.0730841	0.0210996	0.583699
LIN_NPAS4_TARGETS_DN	-0.0538165	-0.0217566	-0.0642195	0.0978336	0.110203	0.0938932	-0.0173159	0.582484
MUELLER_PLURINET	0.00213513	0.0423058	0.0668483	0.0428204	0.000704274	0.0873261	-0.0064504	0.581975
BANDRES_RESPONSE_TO_CARMUSTIN_MGMT_48HR_DN	-0.0164632	0.00542517	-0.0150875	0.0215431	0.00340385	0.00651939	0.00275669	0.581381
REACTOME_NEGATIVE_REGULATION_OF_THE_PI3K_AKT_NETWORK	-0.0546028	0.00863725	-0.0592587	-0.0317917	0.0645643	0.0322234	0.0539598	0.581296
WP_NUCLEOTIDEBINDING_OLIGOMERIZATION_DOMAIN_NOD_PATHWAY	-0.0908786	0.0376521	-0.113705	0.171492	0.0622023	0.0791694	0.0384284	0.580518
REACTOME_COLLAGEN_BIOSYNTHESIS_AND_MODIFYING_ENZYMES	-0.00976834	-0.00507203	-0.195678	0.00846876	0.0470311	0.110827	0.00364912	0.580343
REACTOME_DEPOSITION_OF_NEW_CENPA_CONTAINING_NUCLEOSOMES_AT_THE_CENTROMERE	-0.00694465	0.030411	0.020811	0.103544	0.0259339	0.119395	-0.0703963	0.580181
REACTOME_POST_TRANSLATIONAL_PROTEIN_MODIFICATION	-0.00975276	0.00727373	-0.0138026	0.00173129	0.0304031	0.0117602	0.000593935	0.578672
ACEVEDO_LIVER_TUMOR_VS_NORMAL_ADJACENT_TISSUE_UP	0.016508	0.00120325	-0.0170745	0.00895054	0.0151639	0.049885	0.00700442	0.578117
WP_TYPE_I_INTERFERON_INDUCTION_AND_SIGNALING_DURING_SARSCOV2_INFECTION	-0.0941606	-0.00493652	-0.109116	0.108274	0.00864633	0.0415815	0.013012	0.577521
REACTOME_AMINO_ACIDS_REGULATE_MTORC1	-0.0310339	-0.0177817	-0.0691606	0.0378332	-0.0156041	0.0544357	0.0384352	0.576332
WP_OXIDATIVE_STRESS	-0.106237	-0.00326548	-0.0248476	0.0556815	0.0500843	0.0114887	0.00859922	0.576092
BOYAULT_LIVER_CANCER_SUBCLASS_G123_UP	0.00271313	0.00613332	-0.0270634	-0.0694806	0.0788487	0.10136	0.0076195	0.576077
GROSS_HYPOXIA_VIA_ELK3_ONLY_DN	-0.0398121	0.0141486	-0.206004	0.126695	-0.0152982	0.139406	0.0626809	0.575137
KEGG_LYSINE_DEGRADATION	-0.0884243	-0.0269223	0.0452265	-0.13019	-0.093754	0.120335	-0.0976923	0.574729
WP_APOPTOSIS_MODULATION_AND_SIGNALING	-0.0658942	-0.00793846	-0.024717	0.127409	0.0158458	0.0760133	0.00132851	0.573348
KINSEY_TARGETS_OF_EWSR1_FLII_FUSION_UP	0.0103532	0.0137379	0.0258844	-0.0127832	-0.00174488	0.0810128	-0.0298327	0.572971
REACTOME_GLOBAL_GENOME_NUCLEOTIDE_EXCISION_REPAIR_GG_NER	-0.0507177	0.0149546	0.0374875	-0.0552018	-0.00697848	0.0437918	0.0189216	0.572404
KIM_WT1_TARGETS_8HR_DN	-0.017938	0.00886227	0.00131963	0.0889259	-0.0190215	0.0834454	-0.0185119	0.572247
UDAYAKUMAR_MED1_TARGETS_UP	0.0251139	-0.0104556	-0.0294106	-0.0336532	0.00767092	0.12255	-0.0431626	0.570976
PID_RB_1PATHWAY	-0.0895999	-0.0212502	-0.00974493	0.059463	0.0649353	0.0370003	0.0116609	0.570656
REACTOME_FOXO_MEDIATED_TRANSCRIPTION_OF_OXIDATIVE_STRESS_METABOLIC_AND_NEURONAL_GENES	-0.338435	-0.0499228	0.0188527	-0.195356	0.0977858	-0.000356884	-0.0535125	0.570441
WP_FLUOROPYRIMIDINE_ACTIVITY	0.0465665	-0.0871101	-0.0768377	-0.317562	0.00424897	0.564307	-0.141746	0.569614
KYNG_RESPONSE_TO_H2O2_VIA_ERCC6_DN	-0.0133278	-0.00816375	0.000633696	0.036499	-0.00500685	0.0385296	0.00770951	0.569465
KANG_DOXORUBICIN_RESISTANCE_UP	0.111873	0.10828	-0.00266096	0.051788	0.0280053	0.204507	0.0200921	0.5693
SU_LIVER	-0.169563	0.00796258	-0.106268	0.0301914	-0.382568	0.95022	-1.16807	0.568746
REACTOME_PI3K_AKT_SIGNALING_IN_CANCER	-0.0860509	-0.00229503	-0.144103	-0.0456938	0.0740887	0.0438344	0.0791275	0.568692
REACTOME_DISEASES_OF_SIGNAL_TRANSDUCTION_BY_GROWTH_FACTOR_RECEPTORS_AND_SECOND_MESSENGERS	-0.0287306	0.00288527	-0.0187435	0.0149481	0.021074	0.0128258	0.029173	0.568097
CHIANG_LIVER_CANCER_SUBCLASS_UNANNOTATED_DN	0.0168474	0.00867942	-0.00230199	-0.00354523	-0.00323722	0.0493546	0.00760076	0.567833
AMIT_EGF_RESPONSE_40_HELA	-0.131908	0.0152407	-0.129471	0.1032	0.0191834	0.0194542	0.0448234	0.567747
PID_CD40_PATHWAY	-0.167281	0.0485976	-0.174093	0.160048	0.0592722	0.0564092	0.116573	0.567082
LIU_TARGETS_OF_VMYB_VS_CMYB_DN	-0.0785846	-0.0468925	-0.119398	0.0377793	0.0497411	0.0831455	0.0900639	0.566959
HEIDENBLAD_AMPLICON_8Q24_UP	-0.140704	-0.0358657	0.088293	-0.149072	-0.170962	0.183581	-0.0611162	0.565675
REACTOME_ER_TO_GOLGI_ANTEROGRADE_TRANSPORT	0.0139574	0.00302086	-0.053544	-0.0736857	0.0277516	0.0944394	-0.00126674	0.5656
REACTOME_NUCLEOTIDE_SALVAGE	0.0833073	-0.0399352	-0.0608905	-0.0718064	-0.0528841	0.412603	-0.0522665	0.565375
BERENJENO_TRANSFORMED_BY_RHOA_UP	-0.00820769	0.00965703	0.000950685	0.0444606	0.0798752	0.0542214	0.0101117	0.565043
WP_HOSTPATHOGEN_INTERACTION_OF_HUMAN_CORONA_VIRUSES_INTERFERON_INDUCTION	-0.0987859	-0.00870304	-0.0993518	0.109943	0.0034443	0.0356142	0.00732418	0.564996
TCGA_GLIOBLASTOMA_COPY_NUMBER_UP	-0.0310259	-0.0381355	-0.00439318	-0.0429564	-0.0471134	0.08744	0.0238818	0.56486
TIAN_TNF_SIGNALING_NOT_VIA_NFKB	-0.140463	1.65861e-05	-0.0848882	0.114076	0.0329565	0.030645	0.0551574	0.563759
DORN_ADENOVIRUS_INFECTION_12HR_DN	-0.0979409	-0.000568954	-0.111734	0.0582363	0.11719	0.0476413	0.0595991	0.561823
SOTIRIOU_BREAST_CANCER_GRADE_1_VS_3_UP	0.056104	0.0582875	-0.00977832	0.0748736	0.0620636	0.0956322	0.054221	0.56149
KEGG_DRUG_METABOLISM_OTHER_ENZYMES	0.0633142	-0.0991822	-0.00391976	-0.0340478	0.0764729	0.476686	-0.131153	0.561382
HU_GENOTOXIC_DAMAGE_4HR	-0.0225745	0.0607848	-0.0309254	0.0934502	0.0248319	0.0435581	-0.0310269	0.560589
WP_INTERFERON_TYPE_I_SIGNALING_PATHWAYS	-0.0454402	0.016754	-0.034912	0.0587012	0.0868804	0.0344062	-0.000951085	0.560509
CAIRO_HEPATOBLASTOMA_CLASSES_UP	0.0208492	0.013624	0.0172415	0.0110728	-0.00216925	0.0751494	-0.0152432	0.560167
TAKEDA_TARGETS_OF_NUP98_HOXA9_FUSION_6HR_DN	-0.197415	0.0357229	-0.109639	0.120479	0.115544	0.00912892	0.0415679	0.559549
WP_MRNA_PROCESSING	-0.0530296	0.0323174	0.035532	0.0369242	0.0340253	0.0197672	-0.00650968	0.559042
HOSHIDA_LIVER_CANCER_SURVIVAL_DN	0.00518836	0.00464526	-0.0279344	0.0194603	0.0529379	0.0492052	0.0260357	0.557663
KIM_ALL_DISORDERS_OLIGODENDROCYTE_NUMBER_CORR_UP	-0.0011848	0.00488394	0.000542057	0.00693617	-0.0103229	0.0135867	-0.00612341	0.557645
REACTOME_G_PROTEIN_MEDIATED_EVENTS	0.00213819	0.00320803	-0.0568771	0.010863	-0.0194239	0.0410586	0.00503353	0.555771
KEGG_HOMOLOGOUS_RECOMBINATION	0.0189136	0.0684956	0.137668	0.144294	0.0585009	0.244149	-0.0856625	0.55387
REACTOME_TELOMERE_MAINTENANCE	0.0136868	0.0159615	0.0760408	0.100455	0.0128175	0.157311	0.0019624	0.553858
REACTOME_G1_S_SPECIFIC_TRANSCRIPTION	-0.0276442	0.0303578	0.225768	-0.094005	-0.110089	0.461055	-0.120747	0.553739
BRACHAT_RESPONSE_TO_METHOTREXATE_DN	0.0370893	-0.0108573	-0.071421	0.0335682	0.0671642	0.148111	-0.048801	0.552618
BILBAN_B_CLL_LPL_DN	-0.0760647	-0.0225265	-0.0512716	0.116162	0.028257	0.0583863	-0.00607174	0.552176
LIEN_BREAST_CARCINOMA_METAPLASTIC_VS_DUCTAL_UP	0.0442993	-0.0496895	-0.0591683	-0.0476003	0.0655929	0.232869	-0.0498115	0.552083
BIOCARTA_BAD_PATHWAY	-0.100872	0.0908658	-0.0769615	-0.0240042	0.116446	0.00318174	0.0470277	0.551793
REACTOME_ACTIVATED_TAK1_MEDIATES_P38_MAPK_ACTIVATION	-0.0598576	-0.0242027	0.0044639	-0.0276411	0.0181861	0.0139142	0.0120074	0.550501
ELVIDGE_HYPOXIA_BY_DMOG_UP	-0.0497338	-0.0415515	-0.111848	0.0741104	0.107272	0.0901636	-0.0134464	0.549838
ALCALAY_AML_BY_NPM1_LOCALIZATION_UP	0.00920829	-0.0111325	-0.0868509	0.00303631	-0.0325464	0.079107	-0.000121374	0.549661
WP_RANKLRANK_RECEPTOR_ACTIVATOR_OF_NFKB_LIGAND_SIGNALING_PATHWAY	-0.129819	0.0306018	-0.111394	0.122814	0.0521913	0.0187086	0.0368641	0.549004
REACTOME_MITOCHONDRIAL_TRANSLATION	0.0178648	0.00824046	-0.0342184	-0.00739219	-0.138838	0.233837	0.0531635	0.548519
CHEN_NEUROBLASTOMA_COPY_NUMBER_GAINS	-0.0176569	-0.0112533	0.0510891	-0.0340906	0.0504787	0.120711	-0.0721808	0.548176
REACTOME_PROCESSING_OF_CAPPED_INTRONLESS_PRE_MRNA	-0.00906324	0.00172655	0.0248845	-0.137943	0.0415986	0.156026	-0.0310772	0.54773
RAY_TUMORIGENESIS_BY_ERBB2_CDC25A_DN	-0.0205048	0.00833941	-0.0297161	-0.0166625	0.0240287	0.000225577	-0.00196132	0.546548
KEGG_EPITHELIAL_CELL_SIGNALING_IN_HELICOBACTER_PYLORI_INFECTION	-0.0578408	0.00153432	-0.0405268	0.048316	0.00921551	0.00969727	0.0225632	0.546384
WP_PROLACTIN_SIGNALING_PATHWAY	-0.0719626	0.012437	-0.0448955	0.0565824	0.0523014	0.00711259	0.00288235	0.546015
PID_RXR_VDR_PATHWAY	-0.763945	0.116651	-1.15012	0.446792	0.642302	0.240556	0.518585	0.545699
SANSOM_APC_TARGETS_REQUIRE_MYC	-0.0408895	0.0128546	0.0709697	0.0454482	0.0169501	0.0636178	0.0147168	0.545196
SHETH_LIVER_CANCER_VS_TXNIP_LOSS_PAM4	0.00827696	-0.0236529	-0.00846193	0.00414929	-0.0640526	0.16231	-0.0858776	0.545174
BIOCARTA_CREB_PATHWAY	-0.00607683	0.093304	-0.113327	-0.0375091	0.00787886	0.0511361	0.0547968	0.545173
KOKKINAKIS_METHIONINE_DEPRIVATION_48HR_DN	0.0392893	0.00131174	-0.0296846	0.0295497	0.00998856	0.115051	-0.0161679	0.545125
KEGG_CYTOSOLIC_DNA_SENSING_PATHWAY	-0.109295	-0.0115474	-0.0692339	0.093812	-0.00158258	0.0101094	-0.0180863	0.544595
WP_REGULATORY_CIRCUITS_OF_THE_STAT3_SIGNALING_PATHWAY	-0.16277	0.0684561	0.0171155	0.188018	0.158401	0.0635727	-0.026739	0.543833
IVANOVSKA_MIR106B_TARGETS	-0.0494322	0.024463	0.0113006	0.0281207	-0.0553801	0.0249044	-0.0381961	0.543556
KEGG_CYSTEINE_AND_METHIONINE_METABOLISM	-0.0321655	-0.0212387	0.084651	-0.0367725	0.0257214	0.145345	-0.0587926	0.543053
ACEVEDO_NORMAL_TISSUE_ADJACENT_TO_LIVER_TUMOR_DN	0.00217061	-0.00599548	-0.00495094	0.0119329	-0.0288609	0.0531363	-0.00795411	0.54284
FLECHNER_PBL_KIDNEY_TRANSPLANT_OK_VS_DONOR_UP	-0.00995117	0.00453079	-0.00757106	0.00645348	0.0186109	0.00417648	-0.00193959	0.542342
BIOCARTA_CERAMIDE_PATHWAY	-0.177932	0.0639011	-0.077402	0.105303	0.127249	0.00416295	0.0561686	0.542221
FERREIRA_EWINGS_SARCOMA_UNSTABLE_VS_STABLE_UP	0.0721626	0.0549985	-0.0110029	-0.0580846	0.0408496	0.17437	-0.0100597	0.540648
PID_ERBB2_ERBB3_PATHWAY	-0.0586045	0.0232532	-0.027551	-0.00477389	0.0421606	0.00315524	0.0439486	0.540431
REACTOME_FLT3_SIGNALING	-0.0108476	0.00913519	-0.00907316	-0.0449675	-0.00776673	0.0185283	-0.00307352	0.540053
RAO_BOUND_BY_SALL4_ISOFORM_A	0.00910378	-0.0252645	-0.0563637	-0.0489488	-0.0491386	0.0996138	-0.0667416	0.539517
TONG_INTERACT_WITH_PTTG1	-0.0062899	-0.00789321	0.00636679	-0.0378958	-0.022077	0.0663258	0.0211181	0.53937
TIEN_INTESTINE_PROBIOTICS_6HR_UP	-0.0129297	-0.00152622	-0.00957642	0.00757765	0.0054585	0.00164833	0.00540186	0.537816
REACTOME_INTERLEUKIN_6_FAMILY_SIGNALING	-0.31885	0.0988216	-0.176245	0.34775	0.406435	0.110286	-0.0923641	0.536472
WP_TOLLLIKE_RECEPTOR_SIGNALING_PATHWAY	-0.10958	0.0263731	-0.0655589	0.0762359	0.0295095	-0.00425652	0.0248111	0.535947
BENPORATH_CYCLING_GENES	-0.0211114	0.0149514	-0.0286871	-0.0240544	0.0159786	0.00427485	0.0191012	0.535419
CASORELLI_ACUTE_PROMYELOCYTIC_LEUKEMIA_DN	0.0151438	0.0222769	0.0209365	0.0151502	-0.00534435	0.0643436	-0.0290651	0.534896
WP_TOLLLIKE_RECEPTOR_SIGNALING_RELATED_TO_MYD88	-0.844776	-0.0702906	-0.152955	0.323063	0.0260675	-0.0689756	0.0305292	0.534255
PID_HNF3A_PATHWAY	-0.151514	0.0130322	-0.0813537	0.106387	0.0637643	0.00794803	0.044501	0.534078
JECHLINGER_EPITHELIAL_TO_MESENCHYMAL_TRANSITION_UP	0.0126451	0.0629543	-0.166467	0.113974	0.0572959	0.10949	-0.0429853	0.53312
LI_WILMS_TUMOR_VS_FETAL_KIDNEY_2_UP	0.00188978	0.0113263	0.0140707	-0.0861994	0.0861503	0.117953	-0.0390173	0.532882
WP_B_CELL_RECEPTOR_SIGNALING_PATHWAY	-0.0573341	0.0235329	-0.109508	0.00495512	0.0482833	0.0130149	0.0486192	0.532851
PID_SMAD2_3NUCLEAR_PATHWAY	-0.075636	-0.00400297	-0.0769759	0.0698625	0.0669136	0.0361236	0.0583081	0.532697
MENSE_HYPOXIA_UP	-0.0168305	-0.030526	-0.138474	0.0471647	0.214375	0.163772	-0.0407064	0.532694
ELVIDGE_HIF1A_AND_HIF2A_TARGETS_DN	-0.0250765	-0.0322309	-0.193888	0.062248	0.211522	0.163278	-0.0446602	0.531663
REACTOME_ASPARAGINE_N_LINKED_GLYCOSYLATION	0.017508	0.0024483	-0.033314	-0.00956366	0.0144961	0.0470798	-0.00381474	0.529757
REACTOME_DNA_STRAND_ELONGATION	0.0964156	0.0833408	0.16151	-0.162425	-0.125392	0.594499	-0.171222	0.529404
CHUNG_BLISTER_CYTOTOXICITY_UP	0.0191794	-0.00284898	-0.0503498	0.0276933	0.0207533	0.066968	0.00256844	0.52924
VERNELL_RETINOBLASTOMA_PATHWAY_UP	-0.0359087	-0.00373079	0.137075	0.0251412	-0.100534	0.274317	-0.108579	0.529194
BERNARD_PPAPDC1B_TARGETS_UP	0.0108522	-0.0290085	-0.0181033	-0.0232016	-0.0272751	0.102024	-0.0419304	0.52912
PID_IL2_PI3K_PATHWAY	-0.0106795	0.0213632	-0.0955287	0.0564126	0.0503984	0.0480596	0.0125667	0.528668
REACTOME_DISEASES_OF_PROGRAMMED_CELL_DEATH	-0.0504651	0.0309749	0.0127329	0.0750416	0.0179627	0.0225872	-0.00158392	0.528173
LI_CISPLATIN_RESISTANCE_DN	-0.0763291	-0.161537	0.029901	-0.0772814	0.0675567	0.239173	-0.0650242	0.528159
SCHAEFFER_PROSTATE_DEVELOPMENT_6HR_UP	7.8127e-05	0.00959936	-0.0553292	0.0221132	-0.00420376	0.027348	-0.0211654	0.527965
KEGG_CALCIUM_SIGNALING_PATHWAY	0.00082067	-0.0104093	-0.00863969	-0.058458	-0.0094074	0.0636068	-0.0254732	0.527742
PID_ERA_GENOMIC_PATHWAY	-0.0479403	0.00890248	-0.0301559	0.0316405	0.0109507	0.00111753	0.0232402	0.527697
WP_GLYCOLYSIS_AND_GLUCONEOGENESIS	-0.017986	-0.026414	-0.0309914	0.0878468	0.05201	0.100918	-0.0692669	0.527637
REACTOME_DISEASES_OF_IMMUNE_SYSTEM	-0.0962841	0.00187371	-0.141969	0.122431	0.0575582	0.0403826	0.0270871	0.527472
BIOCARTA_IL2RB_PATHWAY	-0.0825272	0.0274516	-0.0777028	0.132064	-0.0305067	0.0469256	0.0410733	0.526229
DODD_NASOPHARYNGEAL_CARCINOMA_DN	0.0128211	0.0100739	0.0193686	-0.00702982	0.00901212	0.0488506	-0.0104166	0.526219
KEGG_BUTANOATE_METABOLISM	-0.021638	0.0756959	0.0014494	0.038563	-0.0873017	0.0635025	-0.0324328	0.525989
ROSS_AML_OF_FAB_M7_TYPE	-0.0604559	0.0367671	-0.0648882	-0.0354173	0.131064	0.0233703	-0.0139598	0.525513
REACTOME_DAG_AND_IP3_SIGNALING	-0.0131312	0.00337998	-0.0902926	0.0721647	0.0450507	0.0569693	-0.0138111	0.524759
TAKAO_RESPONSE_TO_UVB_RADIATION_UP	-0.0140294	0.0173368	-0.00908692	0.0181516	0.0185965	0.0082216	0.0240722	0.524381
GRAESSMANN_APOPTOSIS_BY_SERUM_DEPRIVATION_DN	0.00245135	-0.0344342	-0.081989	-0.00263348	0.120098	0.118672	-0.0435181	0.522725
LEE_EARLY_T_LYMPHOCYTE_UP	0.144438	0.0602166	-0.0463381	-0.00429531	-0.139296	0.447563	-0.0591865	0.522139
WHITFIELD_CELL_CYCLE_M_G1	-0.000404101	0.00684723	-0.0575759	-0.0133036	0.0340713	0.0395712	0.0316299	0.521756
WP_PREIMPLANTATION_EMBRYO	-0.106909	-0.0491641	-0.00883702	0.0541934	-0.0280459	0.0384619	0.0345312	0.521741
LIU_BREAST_CANCER	0.00244552	0.00137133	-0.0575792	0.0232475	-0.00667971	0.0362206	-0.00203261	0.521133
REACTOME_MTOR_SIGNALLING	0.050615	0.0259656	-0.0986884	-0.0488121	-0.0361884	0.134584	-0.0350821	0.521047
REACTOME_INTERACTIONS_OF_VPR_WITH_HOST_CELLULAR_PROTEINS	0.000954088	-0.0178549	0.0371596	0.043117	0.00989838	0.0946741	0.0173628	0.520995
REACTOME_PHASE_II_CONJUGATION_OF_COMPOUNDS	-0.0417327	-0.0129944	-0.115912	0.114695	0.0142526	0.0780835	0.0343384	0.520793
HILLION_HMGA1_TARGETS	-0.00123214	-0.000259803	-0.00268993	0.0231182	0.0144176	0.0189659	0.00124525	0.520495
REACTOME_PLATELET_CALCIUM_HOMEOSTASIS	0.00473328	-0.00401978	-0.116164	-0.033892	0.0543812	0.0703838	0.00711011	0.520137
SCHAEFFER_PROSTATE_DEVELOPMENT_12HR_UP	-0.0487006	-0.0331184	-0.0700233	0.0808368	0.039187	0.0499144	-0.0103484	0.519852
HARRIS_HYPOXIA	-0.0355981	-0.00444139	-0.12874	0.0746589	0.111774	0.0697547	-0.00805047	0.519704
MARTIN_VIRAL_GPCR_SIGNALING_DN	-0.144621	-0.0123399	-0.0277422	-0.0197995	0.0960284	0.017114	0.0798909	0.519657
KIM_WT1_TARGETS_DN	-0.02503	-0.00842331	0.00993817	0.0293439	0.00786766	0.0215271	-0.0162327	0.519364
JAZAG_TGFB1_SIGNALING_UP	0.0197201	-0.00533847	0.0133655	-0.00545849	-0.0386616	0.12541	-0.0438887	0.518955
CORRE_MULTIPLE_MYELOMA_DN	-0.10463	-0.0705985	-0.0305302	0.0559934	-0.103015	0.0671306	0.00577717	0.51866
CAFFAREL_RESPONSE_TO_THC_DN	-0.0109298	0.0276555	0.0243895	-0.0268661	-0.068095	0.0859367	0.0314708	0.518297
THEILGAARD_NEUTROPHIL_AT_SKIN_WOUND_DN	-0.0152754	0.00827659	-0.0222727	0.0297748	0.0078087	0.00838594	0.00288952	0.51816
REACTOME_HDACS_DEACETYLATE_HISTONES	-0.0740885	0.00956705	0.0232927	-0.0300057	0.00645612	0.00841269	0.0312352	0.517296
WP_FRAGILE_X_SYNDROME	-0.0418233	0.0276657	-0.00231064	-0.00976707	0.0191668	-0.00888449	0.00352547	0.516639
MOOTHA_GLUCONEOGENESIS	0.0106683	-0.00805884	-0.0195266	0.060369	-0.0022033	0.102445	-0.066421	0.515896
IIZUKA_LIVER_CANCER_PROGRESSION_G2_G3_UP	0.0469684	-0.0460679	-0.115249	-0.0194215	0.102134	0.198955	-0.0586333	0.515794
DITTMER_PTHLH_TARGETS_UP	-0.00339995	0.00989259	-0.0666369	0.0189706	0.019509	0.0304998	0.0190075	0.515408
BYSTROEM_CORRELATED_WITH_IL5_UP	-0.0398364	0.00949714	-0.0759475	0.0362843	0.0815305	0.0241273	0.00414901	0.514416
RASHI_RESPONSE_TO_IONIZING_RADIATION_3	-0.0571058	-0.0275784	0.00792692	0.0513216	-0.0221986	0.0362333	-0.0156835	0.514092
KEGG_TOLL_LIKE_RECEPTOR_SIGNALING_PATHWAY	-0.0960043	0.0265582	-0.0653737	0.0764828	0.0292918	-0.00400968	0.0245532	0.513926
CAFFAREL_RESPONSE_TO_THC_24HR_5_DN	0.038765	0.00879007	-0.0447245	0.0787879	-0.0038138	0.124055	-0.0131616	0.51334
REACTOME_TRANSLATION	0.00910731	-0.000884703	-0.0131157	-0.00892686	-0.0136951	0.0364865	0.00577444	0.513176
TAYLOR_METHYLATED_IN_ACUTE_LYMPHOBLASTIC_LEUKEMIA	-0.0707311	0.0100058	-0.0612915	0.0530937	0.0209857	0.00579842	0.0417298	0.512332
PID_TCR_CALCIUM_PATHWAY	-0.168157	0.0391236	-0.106927	0.0766394	0.129999	-0.00787539	0.0544723	0.51193
BOGNI_TREATMENT_RELATED_MYELOID_LEUKEMIA_UP	-0.00738249	-0.0167434	0.0139753	-0.0190672	0.0279862	0.0853357	-0.0827388	0.511747
REACTOME_ACTIVATION_OF_ANTERIOR_HOX_GENES_IN_HINDBRAIN_DEVELOPMENT_DURING_EARLY_EMBRYOGENESIS	-0.111017	0.0081337	-0.00476283	0.0908615	0.0514593	0.0144888	0.00944336	0.51166
SCHLINGEMANN_SKIN_CARCINOGENESIS_TPA_UP	0.0319773	0.00687195	0.00978799	0.0375766	0.0480806	0.0894128	-0.0175711	0.51149
CUI_TCF21_TARGETS_2_UP	0.0172936	0.0190699	-0.00687648	0.0333176	0.029058	0.0371372	-0.00519957	0.511376
WP_DNA_REPAIR_PATHWAYS_FULL_NETWORK	-0.0103074	0.0211679	0.0385264	-0.108358	0.0768514	0.115184	0.0142345	0.510833
KEGG_VALINE_LEUCINE_AND_ISOLEUCINE_DEGRADATION	0.0272683	0.042701	-0.0294321	0.0641249	-0.107294	0.161814	-0.068853	0.510286
LI_DCP2_BOUND_MRNA	-0.0254162	-0.0114957	0.00956936	0.0492749	-0.0257763	0.057645	0.0301129	0.510235
MARTINEZ_RB1_TARGETS_DN	-0.00595986	-0.00421394	-0.0279133	-0.00175475	0.00975755	0.0115682	0.0100656	0.509872
REACTOME_CYCLIN_D_ASSOCIATED_EVENTS_IN_G1	-0.0187602	-0.0223084	0.0129575	0.0150495	0.0479768	0.0465669	0.00159545	0.508952
HU_GENOTOXIC_DAMAGE_24HR	-0.0505776	-0.0106965	-0.0138085	0.0467317	0.0166641	0.0113065	2.23681e-05	0.508914
KEGG_RENAL_CELL_CARCINOMA	-0.0270305	0.0366923	-0.0871523	-0.0214393	0.0235659	0.0152547	0.0459536	0.507695
REACTOME_TRANSCRIPTIONAL_ACTIVATION_OF_MITOCHONDRIAL_BIOGENESIS	-0.0393997	-0.00345187	0.0280177	0.0170342	-0.0122497	0.0203093	-0.0131387	0.506718
FLOTHO_PEDIATRIC_ALL_THERAPY_RESPONSE_DN	-0.401895	0.0844631	-0.11664	0.275909	-0.168207	-0.00536058	0.0641297	0.506343
WP_CANNABINOID_RECEPTOR_SIGNALING	-0.0764857	0.0911304	-0.0830679	0.115886	0.000660383	0.00862876	0.00389515	0.506326
STEIN_ESRRA_TARGETS_RESPONSIVE_TO_ESTROGEN_DN	0.0121777	0.0363138	0.112885	-0.0141211	0.0210177	0.144035	0.0270912	0.506184
REACTOME_NEGATIVE_REGULATION_OF_MAPK_PATHWAY	-0.0812743	-0.0229349	0.024306	-0.0415811	-0.0468057	0.0358044	0.0383365	0.505975
MULLIGHAN_MLL_SIGNATURE_1_DN	-0.0236759	0.00251565	-0.0288282	0.0289036	-0.00375682	0.00518411	0.00557712	0.505809
BIOCARTA_IGF1R_PATHWAY	-0.0160733	0.103752	-0.0967663	0.00756716	0.0810452	0.0248081	0.0291176	0.505435
GRUETZMANN_PANCREATIC_CANCER_DN	-0.00565682	-0.00690289	-0.00989854	0.0203433	0.00875813	0.0167205	-0.00668693	0.505004
BIOCARTA_DEATH_PATHWAY	-0.070929	-0.0401652	-0.064705	0.15855	-0.010729	0.0972972	0.00989607	0.504771
SHAFFER_IRF4_TARGETS_IN_PLASMA_CELL_VS_MATURE_B_LYMPHOCYTE	-0.035725	3.963e-05	-0.0747234	0.0653377	0.0636418	0.0434766	0.045366	0.504321
KLEIN_PRIMARY_EFFUSION_LYMPHOMA_UP	-0.00976389	-0.0204949	0.00318385	-0.0638375	-0.0248087	0.0672653	-0.0467195	0.503585
REACTOME_TOLL_LIKE_RECEPTOR_CASCADES	-0.0606964	-0.0126345	-0.0322117	0.0165715	0.0218417	0.00419317	0.036066	0.502972
YU_MYC_TARGETS_UP	0.163904	0.0916334	0.0655698	0.0493748	0.087254	0.319561	-0.00922399	0.502338
STEIN_ESRRA_TARGETS_UP	0.00205987	-0.0212639	0.0169406	0.0637806	-0.023707	0.113771	-0.0250236	0.502063
REACTOME_CHROMATIN_MODIFYING_ENZYMES	-0.0772912	0.0131467	0.0134127	0.0302291	0.012681	-0.00240599	0.0109061	0.501718
HOLLERN_EMT_BREAST_TUMOR_UP	0.040266	0.0492954	-0.196833	0.0420145	0.0944731	0.124895	0.00260022	0.501316
BLUM_RESPONSE_TO_SALIRASIB_DN	0.0194459	0.0401852	0.0178785	0.0196444	0.0576318	0.0379769	0.00532188	0.500997
FARDIN_HYPOXIA_11	-0.0168546	-0.0654017	-0.115089	0.0691486	0.292488	0.230345	-0.0878452	0.50081
UEDA_CENTRAL_CLOCK	-0.0943906	0.0100629	-0.05013	0.0526736	0.0128858	-0.00256565	0.0501393	0.499998
VALK_AML_CLUSTER_7	0.0149755	-0.0139061	-0.0316958	-0.134806	0.0525934	0.161507	-0.12949	0.499931
CHEOK_RESPONSE_TO_HD_MTX_DN	-0.0737037	0.0372281	-0.164076	0.0548094	0.0682369	0.00600741	0.0131596	0.499264
BURTON_ADIPOGENESIS_3	0.129648	0.0964919	-0.0350794	0.129473	0.0222387	0.229549	0.0653674	0.49823
WP_ADIPOGENESIS	-0.101905	-0.00296122	-0.110145	0.129165	0.100496	0.0389212	0.0300144	0.497236
REACTOME_DISEASES_OF_METABOLISM	0.017494	-0.0317367	-0.045613	0.00934609	0.0288994	0.104049	-0.0745072	0.496958
PID_IL12_2PATHWAY	-0.126396	0.0178554	-0.101133	0.151476	0.105818	0.0259829	0.0123244	0.496547
CHAUHAN_RESPONSE_TO_METHOXYESTRADIOL_DN	-0.0388847	0.0107785	-0.0122199	0.0253384	0.0287019	-0.00195435	0.00276365	0.496478
WP_HEPATITIS_B_INFECTION	-0.0506356	0.000482254	-0.0245568	0.0661242	0.048644	0.0204369	0.0143795	0.496103
REACTOME_MTORC1_MEDIATED_SIGNALLING	0.0368257	-0.00255085	-0.0951217	-0.0164141	-0.0148265	0.100497	-0.0500709	0.495694
DORN_ADENOVIRUS_INFECTION_24HR_DN	-0.0879048	0.00938709	-0.103683	0.0806262	0.110525	0.0295088	0.0564862	0.495601
DARWICHE_PAPILLOMA_RISK_HIGH_DN	-0.0347844	0.000780198	-0.0395198	0.00867584	0.0606793	0.00948909	0.00129684	0.494878
NAGASHIMA_EGF_SIGNALING_UP	-0.205823	0.0166616	-0.127653	0.114694	0.072154	-0.0151478	0.0811347	0.494613
SARRIO_EPITHELIAL_MESENCHYMAL_TRANSITION_UP	0.0381338	0.0236369	-0.0141801	0.0051738	-0.0136084	0.0907781	0.0431596	0.49441
REACTOME_DISEASES_OF_CARBOHYDRATE_METABOLISM	-0.055756	-0.0312671	0.0340643	-0.0328055	-0.0449108	0.0415776	-0.018246	0.494082
BOQUEST_STEM_CELL_UP	0.0387076	-0.0140712	-0.236956	0.0425142	0.100995	0.176496	0.0301547	0.494054
REACTOME_INSULIN_RECEPTOR_RECYCLING	-0.0821722	-0.00689028	-0.030023	0.0604763	-0.0520957	0.0246062	0.0462248	0.493624
DORSAM_HOXA9_TARGETS_DN	-0.0719025	-0.00670272	-0.0292161	0.0697317	0.0420827	0.0125189	0.00665985	0.493322
WP_NOCGMPPKG_MEDIATED_NEUROPROTECTION	0.0166626	-0.00329067	-0.0870141	0.0860823	0.0753166	0.0997836	0.00446393	0.493107
PIONTEK_PKD1_TARGETS_UP	-0.0607932	-0.149152	-0.150503	-0.0468848	0.0460606	0.160231	0.0825616	0.492522
WP_TLR4_SIGNALING_AND_TOLERANCE	-0.136325	-0.0149625	-0.229547	0.24633	0.0636643	0.0929751	0.0532444	0.492376
KAAB_HEART_ATRIUM_VS_VENTRICLE_DN	0.0250595	-0.00935453	-0.019448	0.00680456	-0.0298017	0.0915938	-0.0187615	0.49237
SEMENZA_HIF1_TARGETS	-0.0328842	-0.0232497	-0.0869997	0.057555	0.160806	0.0888962	-0.0348494	0.492282
PID_NFKAPPAB_CANONICAL_PATHWAY	-0.181852	0.0371147	-0.257895	0.188259	0.189843	0.0535524	0.123694	0.492254
JOSEPH_RESPONSE_TO_SODIUM_BUTYRATE_UP	-0.0143059	-0.0184755	-0.119564	0.00788662	-0.0251882	0.0621997	0.049316	0.491922
SONG_TARGETS_OF_IE86_CMV_PROTEIN	0.0358006	0.0447677	0.154046	-0.0623386	-0.119076	0.345668	-0.0588559	0.491632
HU_GENOTOXIN_ACTION_DIRECT_VS_INDIRECT_24HR	0.00727944	0.034923	-0.0487277	0.015619	0.037792	0.024015	-0.00794441	0.491172
STEIN_ESR1_TARGETS	-0.0554589	-0.0059965	-0.0101175	0.031262	0.0376842	0.0202843	0.0522419	0.491139
BOYLAN_MULTIPLE_MYELOMA_C_UP	-0.0917547	0.113286	0.0348025	0.102846	0.0120455	0.0144806	0.0224316	0.489374
NIKOLSKY_BREAST_CANCER_8Q12_Q22_AMPLICON	-0.000453268	0.0515307	-0.129433	0.00344675	0.030829	0.0366285	0.022219	0.489054
RICKMAN_TUMOR_DIFFERENTIATED_MODERATELY_VS_POORLY_UP	0.0134282	0.01798	-0.0273133	0.00342945	0.0198814	0.025358	-0.0139376	0.488682
BENPORATH_EED_TARGETS	-0.0556791	-0.0233376	-0.0280871	0.00537661	0.0127631	-0.00532379	0.0123943	0.487428
KEGG_OLFACTORY_TRANSDUCTION	0.0190288	0.00267057	-0.0842262	0.0235568	0.0124174	0.0606429	-0.00563915	0.487124
BIOCARTA_VEGF_PATHWAY	0.0180006	-0.01692	0.0382926	-0.0987206	0.0128075	0.198738	-0.134573	0.486744
WP_INTERACTIONS_BETWEEN_IMMUNE_CELLS_AND_MICRORNAS_IN_TUMOR_MICROENVIRONMENT	-0.407299	0.0221536	-0.23159	0.504731	0.0763257	0.0621619	-0.0430948	0.486699
REACTOME_TELOMERE_C_STRAND_LAGGING_STRAND_SYNTHESIS	0.0817989	-0.00353153	0.140146	-0.091744	-0.151476	0.514553	-0.140055	0.48643
STAEGE_EWING_FAMILY_TUMOR	-0.00546578	0.00256911	-0.000750458	0.0169733	0.0207159	0.0109637	-0.00108743	0.486174
BROWNE_HCMV_INFECTION_2HR_UP	-0.21328	0.0408831	-0.138307	0.200932	0.139447	0.0235964	0.115385	0.486116
FONTAINE_FOLLICULAR_THYROID_ADENOMA_UP	-0.02772	-0.000555006	-0.0426713	0.0529788	-0.0280364	0.033417	0.0322665	0.485973
GROSS_HIF1A_TARGETS_DN	0.0112504	-0.0245939	-0.113618	-0.022354	0.164321	0.135092	-0.083873	0.485364
BIOCARTA_IL2_PATHWAY	-0.0824651	0.0392598	-0.0234531	0.0396695	0.0301538	-0.0120279	0.0375945	0.484549
WEIGEL_OXIDATIVE_STRESS_BY_HNE_AND_H2O2	-0.0744632	0.00433778	-0.00978459	0.0170612	0.0667543	0.00549669	0.0350737	0.484205
WINNEPENNINCKX_MELANOMA_METASTASIS_UP	0.0549615	0.060101	-0.0521513	0.0574593	0.0756849	0.0877954	0.010508	0.482811
STEIN_ESRRA_TARGETS	0.00328399	-0.0178535	0.0157399	0.0484913	-0.0126944	0.0854383	-0.0211007	0.482271
REACTOME_CARGO_TRAFFICKING_TO_THE_PERICILIARY_MEMBRANE	-0.0438328	0.0212912	-0.0288166	0.0463647	0.00771774	-0.00178187	0.0119157	0.481924
CONCANNON_APOPTOSIS_BY_EPOXOMICIN_UP	-0.0299826	-0.00664192	-0.0397939	0.0541429	0.00572656	0.0200102	0.0105623	0.481639
LIU_SOX4_TARGETS_DN	-0.0316002	-0.00460913	0.023593	0.0199908	0.0217807	0.0188374	-0.0166003	0.48155
MAGRANGEAS_MULTIPLE_MYELOMA_IGG_VS_IGA_DN	-0.00130906	-0.00384955	-0.0861432	-0.00702337	-0.00337066	0.0419241	0.0321022	0.480837
REACTOME_GLUCONEOGENESIS	0.0103365	-0.00546615	-0.00871144	0.0777857	-0.00480892	0.103422	-0.0659266	0.480656
PUJANA_BRCA1_PCC_NETWORK	0.0074028	0.0133993	0.0276646	0.000671357	-0.0113467	0.0468303	-0.0094617	0.480326
ROVERSI_GLIOMA_LOH_REGIONS	0.0382682	-0.00804543	-0.115886	0.0823501	-0.043949	0.146033	-0.0327838	0.480228
REACTOME_NUCLEAR_ENVELOPE_NE_REASSEMBLY	-0.0460744	0.0296488	0.0043096	0.00872026	0.0380903	8.2903e-05	0.0312595	0.479153
WILCOX_RESPONSE_TO_PROGESTERONE_UP	0.0643015	0.0319514	-0.0572459	0.0647471	0.0765834	0.186564	-0.15228	0.479099
REACTOME_APC_CDC20_MEDIATED_DEGRADATION_OF_NEK2A	-0.0532043	0.0167245	0.017635	0.0473607	-0.0158205	0.011193	0.00110608	0.47907
MIKKELSEN_ES_ICP_WITH_H3K4ME3	-0.0266834	-0.0140178	-0.0545992	0.0346913	0.000743474	0.010763	-0.00955554	0.479044
GUTIERREZ_MULTIPLE_MYELOMA_UP	0.0293597	0.00335185	-0.0554946	0.0181519	-0.0358208	0.0829146	-0.0192611	0.478404
GUILLAUMOND_KLF10_TARGETS_DN	0.0365516	-0.0251792	-0.0450987	0.0376217	0.0308453	0.114738	0.000887101	0.477341
PID_CASPASE_PATHWAY	-0.0246364	-0.00585362	0.0240003	0.0497059	-0.0142529	0.0436689	-0.0124348	0.47711
LUCAS_HNF4A_TARGETS_UP	-0.0219288	-0.0142404	-0.0729904	0.0615306	0.0793092	0.0526879	0.0186302	0.476861
MUNSHI_MULTIPLE_MYELOMA_UP	-0.0517345	0.014414	-0.0770007	0.063917	0.0375405	0.00913662	0.0242677	0.476414
REACTOME_REGULATION_OF_TP53_ACTIVITY_THROUGH_PHOSPHORYLATION	-0.0383116	0.0035214	0.0727674	0.0613982	-0.114303	0.14558	-0.0374157	0.475611
HOLLEMAN_VINCRISTINE_RESISTANCE_B_ALL_UP	-0.0397516	-0.0216742	0.0272182	-0.253262	-0.00984133	0.187331	-0.195836	0.474652
WILLIAMS_ESR2_TARGETS_UP	0.0814035	-0.131651	-0.150047	0.0392126	-0.105702	0.386512	-0.067383	0.474651
BALDWIN_PRKCI_TARGETS_UP	-0.0529854	0.0412503	-0.0436475	-0.0159435	0.0879917	-0.00331685	0.00545148	0.473121
STEIN_ESRRA_TARGETS_RESPONSIVE_TO_ESTROGEN_UP	-0.100941	-0.00236632	-0.0580495	-0.0945046	0.111976	0.0329166	0.0917472	0.472985
REACTOME_ADAPTIVE_IMMUNE_SYSTEM	-0.026159	0.00275327	-0.0037891	0.0194373	0.0194831	0.0012741	0.00487601	0.472838
DUTTA_APOPTOSIS_VIA_NFKB	-0.142146	0.0668011	-0.121127	0.114469	0.139851	-0.0104494	0.0323905	0.471879
SUBTIL_PROGESTIN_TARGETS	-0.0333696	0.00449099	-0.0846407	0.0876469	0.0535657	0.036619	0.0111594	0.471688
OSWALD_HEMATOPOIETIC_STEM_CELL_IN_COLLAGEN_GEL_UP	-0.141742	0.00507001	-0.090189	0.113411	0.0439092	-0.00837782	0.0333215	0.471087
ELVIDGE_HYPOXIA_UP	-0.0545817	-0.0165868	-0.110179	0.117912	0.0840859	0.0553662	0.0108273	0.470788
ICHIBA_GRAFT_VERSUS_HOST_DISEASE_D7_DN	0.0129979	-0.0289519	-0.0530194	0.0272654	0.027484	0.0752318	-0.0448125	0.470398
PID_IL6_7_PATHWAY	-0.067528	0.00684497	-0.12078	0.102344	0.100082	0.0336974	0.0270174	0.469357
GARGALOVIC_RESPONSE_TO_OXIDIZED_PHOSPHOLIPIDS_YELLOW_UP	-0.219858	-0.0111185	-0.188016	0.176076	0.0229779	-0.0178736	0.037856	0.468857
WP_OVERVIEW_OF_LEUKOCYTEINTRINSIC_HIPPO_PATHWAY_FUNCTIONS	-0.0156963	-0.0127137	-0.0245244	-0.000214538	0.0659906	0.0309752	-0.0231646	0.468015
MOREAUX_B_LYMPHOCYTE_MATURATION_BY_TACI_DN	0.0291728	-0.0140909	0.0646018	-0.0317224	0.00433057	0.176582	-0.0623254	0.466672
HOEBEKE_LYMPHOID_STEM_CELL_DN	-0.0168101	-0.0112025	-0.00755985	0.0558288	0.0347019	0.0360649	-0.0049476	0.465242
KEGG_B_CELL_RECEPTOR_SIGNALING_PATHWAY	-0.0542844	0.0248241	-0.0645533	0.0161872	0.054648	0.00212477	0.055738	0.464603
BERTUCCI_MEDULLARY_VS_DUCTAL_BREAST_CANCER_UP	-0.0731135	0.0240612	0.0317535	0.0811877	0.0646956	0.0222825	0.0036664	0.464511
PID_LYSOPHOSPHOLIPID_PATHWAY	-0.0490279	-0.00270491	-0.0449088	0.0605734	0.0127522	0.00644259	0.00541222	0.464348
REACTOME_ACTIVATED_NOTCH1_TRANSMITS_SIGNAL_TO_THE_NUCLEUS	-0.0610778	-0.00847114	-0.00210949	0.0264321	-0.0167378	-0.00316876	0.00639365	0.463921
REACTOME_COOPERATION_OF_PREFOLDIN_AND_TRIC_CCT_IN_ACTIN_AND_TUBULIN_FOLDING	0.00884903	0.00643486	-0.0290814	0.00152433	0.0668809	0.0452536	0.0257652	0.463827
REACTOME_NUCLEAR_RECEPTOR_TRANSCRIPTION_PATHWAY	-0.38521	0.0452353	-0.265186	0.111245	0.270702	-0.0221763	0.260008	0.463695
WP_ENDODERM_DIFFERENTIATION	-0.0720815	0.0260864	-0.0220062	-0.132501	0.105722	0.0261076	-0.0116708	0.463618
JINESH_BLEBBISHIELD_VS_LIVE_CONTROL_UP	-0.042449	-0.00427176	-0.0652869	0.0536851	0.032752	0.010373	0.00865485	0.463452
PID_S1P_S1P3_PATHWAY	-0.00171421	0.0320833	-0.0712869	0.0397956	-0.014842	0.0282721	0.0194307	0.462601
BIOCARTA_NFKB_PATHWAY	-0.289354	0.0435569	-0.338027	0.172376	0.165195	-0.0435168	0.0933804	0.462561
HSIAO_HOUSEKEEPING_GENES	-0.00662174	0.00743938	-0.0123476	0.0191334	0.0168449	0.00653946	0.00702872	0.462239
WANG_TARGETS_OF_MLL_CBP_FUSION_DN	0.0509264	-0.00295967	0.0118848	-0.0542928	-0.0196388	0.16379	-0.030451	0.461758
LEE_AGING_NEOCORTEX_UP	-0.0661568	0.0136562	-0.054043	0.024604	0.0439098	-0.0128056	0.0249584	0.461584
KEGG_DNA_REPLICATION	0.0458087	0.0276554	0.247518	-0.0375217	-0.0419198	0.396831	0.0155211	0.461143
ZHENG_FOXP3_TARGETS_UP	-0.106663	-0.0715544	-0.225903	-0.112228	0.255731	0.0850323	0.0129603	0.460388
KEGG_OOCYTE_MEIOSIS	-0.0366029	0.0439705	-0.00727493	0.0210841	0.0358428	-0.00753083	-0.00502555	0.460209
NAKAMURA_TUMOR_ZONE_PERIPHERAL_VS_CENTRAL_UP	0.0189245	0.0207395	0.000775886	0.00945223	0.0132893	0.0246315	-0.00122128	0.460134
PID_P53_REGULATION_PATHWAY	-0.0132883	0.0103589	-0.034438	-0.00955235	-0.018804	-0.000515658	0.010761	0.459691
WP_BASE_EXCISION_REPAIR	0.0591394	0.0250779	-0.0237303	-0.0239833	-0.0642648	0.152756	0.0099491	0.459689
KEGG_BASE_EXCISION_REPAIR	0.0505577	0.0237966	-0.0205371	-0.0330254	-0.0696081	0.143714	0.0115913	0.459623
SCIAN_INVERSED_TARGETS_OF_TP53_AND_TP73_DN	-0.100043	-0.000596273	-0.00462806	0.0272941	0.0773246	-0.00395528	0.014608	0.458606
GAZDA_DIAMOND_BLACKFAN_ANEMIA_MYELOID_DN	-0.0135515	0.0116539	0.0197875	-0.00978889	-0.0209341	0.0175018	-0.01508	0.458487
REACTOME_WNT_LIGAND_BIOGENESIS_AND_TRAFFICKING	-0.0323055	0.0173657	-0.103333	-0.169349	-0.00593601	0.0760868	0.0880251	0.457103
WP_TNF_RELATED_WEAK_INDUCER_OF_APOPTOSIS_TWEAK_SIGNALING_PATHWAY	-0.0983145	0.00596679	-0.0490052	0.137953	0.00114027	0.0225706	0.0186324	0.456689
WP_RAS_AND_BRADYKININ_PATHWAYS_IN_COVID19	0.00550091	-0.0119718	-0.13305	-0.0145617	-0.0493878	0.0563124	0.000471764	0.456374
AMIT_SERUM_RESPONSE_40_MCF10A	-0.159734	0.00320644	-0.0686553	0.0884895	0.0570988	-0.0156939	0.0647649	0.456296
WP_BDNFTRKB_SIGNALING	0.0222064	0.015379	-0.0369443	-0.160928	-0.0462292	0.126909	-0.0545737	0.456218
HASLINGER_B_CLL_WITH_13Q14_DELETION	-0.062098	-0.00845738	-0.184127	0.0536286	0.0369242	0.00686497	-0.0188251	0.456067
STONER_ESOPHAGEAL_CARCINOGENESIS_UP	-0.000732304	-0.00450112	-0.0172642	-0.0875104	0.0166088	0.0545027	-0.0392867	0.455557
REACTOME_GROWTH_HORMONE_RECEPTOR_SIGNALING	-0.342679	0.0703017	-0.157281	0.459743	0.109068	0.0361973	-0.00263127	0.455541
PID_CDC42_REG_PATHWAY	0.0207659	0.00415798	0.014142	-0.020138	0.0184906	0.0608357	-0.0129796	0.455276
WP_INTERLEUKIN11_SIGNALING_PATHWAY	-0.047382	0.0435925	-0.0903245	0.0753217	0.113761	0.0259557	0.0521095	0.455174
PID_MET_PATHWAY	-0.0325636	0.0363056	-0.0197431	-0.065094	0.0184748	0.00268328	0.019282	0.452027
TOYOTA_TARGETS_OF_MIR34B_AND_MIR34C	-0.00550644	0.026011	0.0245412	0.00468921	-0.005711	0.0166418	0.00565409	0.451793
WP_MICRORNAS_IN_CARDIOMYOCYTE_HYPERTROPHY	-0.0324684	0.0122406	-0.0880379	0.0308844	0.0690748	0.0121399	0.00946657	0.451496
REACTOME_PROTEIN_FOLDING	-0.015799	0.00613632	-0.00184014	0.0445706	0.0546169	0.0246355	-0.00284593	0.451015
JOHNSTONE_PARVB_TARGETS_1_DN	-0.0317425	0.0111415	-0.0675304	0.0525306	0.0703458	0.0158846	-0.0136856	0.450277
WP_IL17_SIGNALING_PATHWAY	-0.109058	0.064467	-0.237387	0.224049	0.11672	0.0421628	0.0329335	0.450244
WP_PYRIMIDINE_METABOLISM	0.0736692	0.013084	0.0086107	-0.0863376	-0.0210928	0.212234	0.039086	0.449687
AMIT_EGF_RESPONSE_120_HELA	-0.104782	-0.0312975	-0.0879686	0.0997676	0.0752551	0.0283645	0.0656196	0.44944
REACTOME_G_PROTEIN_BETA_GAMMA_SIGNALLING	-0.0344493	0.0459985	-0.0310356	-0.0303125	0.0850632	0.0066135	0.018281	0.449385
WP_FERROPTOSIS	-0.0603116	0.028556	-0.0369026	0.0393051	0.0482083	-0.0130703	0.00770035	0.449088
ABRAHAM_ALPC_VS_MULTIPLE_MYELOMA_UP	-0.066968	0.00132698	-0.0370755	0.123342	0.141272	0.053039	-0.0348493	0.448903
MULLIGHAN_NPM1_MUTATED_SIGNATURE_1_DN	-0.0212705	0.00686227	0.000106511	-0.0313805	-0.0221502	0.00653298	0.0111209	0.448072
LIU_CDX2_TARGETS_UP	-0.704067	-0.101017	-0.671003	0.483554	-0.136407	-0.0946948	0.164216	0.44807
REACTOME_NETRIN_1_SIGNALING	-0.0321573	0.00792355	-0.0308037	-0.0672465	0.0283064	0.00545682	0.0134424	0.447764
ZHU_CMV_8_HR_UP	-0.165311	0.0101995	-0.137901	0.158601	0.149736	0.0209064	0.103157	0.447654
LIAO_HAVE_SOX4_BINDING_SITES	0.0403127	0.0256784	-0.153323	-0.136467	-9.56233e-06	0.103376	-0.024443	0.447628
REACTOME_RHOBTB_GTPASE_CYCLE	-0.0391754	0.00401203	0.00433968	0.0170399	0.0501066	0.0052143	-0.0102401	0.447331
RUAN_RESPONSE_TO_TNF_TROGLITAZONE_DN	-0.0656594	-0.137319	-0.100438	-0.171624	0.197507	0.156255	-0.071498	0.447279
REACTOME_INTERLEUKIN_3_INTERLEUKIN_5_AND_GM_CSF_SIGNALING	-0.0617881	-0.00113199	-0.0426572	0.0817383	0.0745589	0.0204767	0.0258938	0.447022
SHEDDEN_LUNG_CANCER_POOR_SURVIVAL_A6	0.0767963	0.0400018	0.0164113	0.0143126	-0.0147455	0.154234	-0.0219118	0.446505
LIANG_HEMATOPOIESIS_STEM_CELL_NUMBER_SMALL_VS_HUGE_DN	-0.0207542	0.0442147	-0.236298	0.117941	0.00865012	0.0748139	0.0637805	0.445588
REACTOME_INOSITOL_PHOSPHATE_METABOLISM	-0.0662937	0.00462593	-0.0446045	-0.0255195	0.0492591	0.00539253	0.0718754	0.445126
REACTOME_DOWNREGULATION_OF_TGF_BETA_RECEPTOR_SIGNALING	-0.119941	0.0161555	-0.0281067	0.089317	0.0721417	-0.008835	0.0209626	0.44391
DARWICHE_SQUAMOUS_CELL_CARCINOMA_UP	-0.0126161	6.47787e-06	-0.0307424	0.0329729	0.0661034	0.0266523	-0.009483	0.443882
NUNODA_RESPONSE_TO_DASATINIB_IMATINIB_UP	-0.140706	0.00221231	-0.124756	0.167786	0.0550609	0.0215238	0.0846438	0.443255
COLIN_PILOCYTIC_ASTROCYTOMA_VS_GLIOBLASTOMA_UP	0.00886669	0.0468675	-0.0775141	0.0895848	0.0700441	0.0621927	-0.0823038	0.442821
DOANE_BREAST_CANCER_ESR1_UP	-0.0326423	-0.0607589	-0.0580498	-0.00429372	-0.0147196	0.081391	0.0860651	0.442322
JINESH_BLEBBISHIELD_TRANSFORMED_STEM_CELL_SPHERES_DN	-0.0386014	-0.00734733	-0.0865688	0.050931	0.0260355	0.0138729	0.0221177	0.442171
REACTOME_DEATH_RECEPTOR_SIGNALLING	-0.0524963	0.00882956	-0.0390979	0.077218	0.0491512	0.0104294	0.0102046	0.442012
GINESTIER_BREAST_CANCER_20Q13_AMPLIFICATION_UP	-0.0299681	0.0201034	-0.0515154	-0.00953321	0.0330828	-0.0112468	0.00297604	0.441475
WANG_RESPONSE_TO_BEXAROTENE_UP	0.0745311	-0.0473225	-0.0719098	0.0299025	0.0293336	0.216205	-0.116377	0.441033
KOKKINAKIS_METHIONINE_DEPRIVATION_96HR_DN	0.0349478	-0.000754123	-0.0121781	0.0536972	0.0211512	0.0819804	0.00156054	0.440726
PHONG_TNF_TARGETS_UP	-0.140878	-0.00338593	-0.116133	0.129298	0.0664829	-0.00218156	0.0530396	0.440275
SMITH_LIVER_CANCER	0.062487	0.0528532	-0.110714	-0.00498971	-0.00856882	0.0990029	0.00739898	0.43994
LAIHO_COLORECTAL_CANCER_SERRATED_DN	-0.0398224	-0.0362935	0.0265565	-0.0680144	-0.0455037	0.0556935	-0.00556301	0.439934
KEGG_NUCLEOTIDE_EXCISION_REPAIR	-0.0231434	0.0390536	0.0576122	-0.129628	0.0847039	0.0912039	-0.020632	0.439921
WP_NUCLEOTIDE_EXCISION_REPAIR	-0.0231434	0.0390536	0.0576122	-0.129628	0.0847039	0.0912039	-0.020632	0.439921
REACTOME_TRANSCRIPTIONAL_REGULATION_OF_WHITE_ADIPOCYTE_DIFFERENTIATION	-0.0954425	-0.00173924	-0.0791127	0.105519	0.0884144	0.0135929	0.039179	0.439856
BOYAULT_LIVER_CANCER_SUBCLASS_G2	0.0278511	-0.144445	-0.0642389	-0.159496	-0.211668	0.34624	-0.0434977	0.439496
REACTOME_EGFR_DOWNREGULATION	-0.0363181	-0.0619751	-0.0602639	0.00254815	0.0337442	0.0507056	0.0453848	0.439422
REACTOME_HSF1_DEPENDENT_TRANSACTIVATION	-0.048726	-0.00754097	0.0209175	0.00924175	-0.0498993	0.035657	0.0415274	0.439155
REACTOME_GAP_JUNCTION_TRAFFICKING_AND_REGULATION	-0.0647479	0.0166059	-0.0821048	0.0845448	0.0211526	0.0102969	0.0538688	0.439151
DAVIES_MULTIPLE_MYELOMA_VS_MGUS_DN	0.0316509	-0.00881394	-0.0320066	-0.0791544	-0.00276336	0.0969406	-0.0296028	0.438759
WP_MAMMALIAN_DISORDER_OF_SEXUAL_DEVELOPMENT	-0.130739	-0.110657	-0.0434756	0.0868276	0.0607211	0.0748418	0.0827069	0.4384
ODONNELL_METASTASIS_UP	-0.155078	0.105182	-0.18598	0.118281	0.092024	0.0291924	0.251871	0.437916
GUO_TARGETS_OF_IRS1_AND_IRS2	-0.0184585	0.00605598	-0.0177625	0.0338462	0.000964537	0.0069474	0.0137734	0.437457
TANAKA_METHYLATED_IN_ESOPHAGEAL_CARCINOMA	-0.126742	0.0587507	0.033705	0.0788464	-0.0173611	-0.0118121	-0.0696174	0.437279
WP_REGUCALCIN_IN_PROXIMAL_TUBULE_EPITHELIAL_KIDNEY_CELLS	-0.0612067	0.0279533	0.0486421	0.105852	0.00922148	0.0428816	-0.0405962	0.437104
REACTOME_NOTCH3_ACTIVATION_AND_TRANSMISSION_OF_SIGNAL_TO_THE_NUCLEUS	-0.0357372	-0.00929059	-0.00350735	0.0330031	-0.00359832	0.00514876	0.000932212	0.436742
TAKEDA_TARGETS_OF_NUP98_HOXA9_FUSION_3D_DN	-0.163287	0.482725	-3.28219	0.293242	0.264774	0.424181	-0.583391	0.436718
WP_TYPE_I_COLLAGEN_SYNTHESIS_IN_THE_CONTEXT_OF_OSTEOGENESIS_IMPERFECTA	0.00499236	0.0249511	-0.167881	-0.00118468	0.0767138	0.0454308	-0.015444	0.436299
GOLDRATH_IMMUNE_MEMORY	0.0705043	-0.0441284	-0.224654	-0.055326	0.112207	0.188276	-0.0558504	0.436195
BIOCARTA_RAS_PATHWAY	-0.0271739	0.0536807	-0.0328346	0.00405634	0.00463211	-0.0135944	0.000849026	0.436175
LASTOWSKA_NEUROBLASTOMA_COPY_NUMBER_DN	-0.0428776	0.0177351	0.0312665	-0.00585604	0.0103538	0.0013861	-0.0148768	0.4359
NATSUME_RESPONSE_TO_INTERFERON_BETA_DN	-0.0260611	0.0111096	-0.0113753	0.0373308	0.0314866	0.00439904	0.00777877	0.435422
BURTON_ADIPOGENESIS_6	0.0370288	-0.0124198	-0.0403241	0.00713262	-0.0356257	0.101376	-0.0483558	0.434728
REACTOME_MITOCHONDRIAL_PROTEIN_IMPORT	-0.00155335	0.00490874	0.0203792	-0.0304762	-0.0641219	0.0689054	-0.0112484	0.43448
MARTINEZ_RB1_AND_TP53_TARGETS_DN	-0.00059761	0.00147784	-0.0175645	0.0028059	0.0184187	0.00774231	-0.00316922	0.434166
MATZUK_MALE_REPRODUCTION_SERTOLI	-0.119935	-0.0628271	0.0594437	-0.00491107	0.106608	0.0614096	0.0360552	0.432138
REACTOME_TP53_REGULATES_TRANSCRIPTION_OF_CELL_DEATH_GENES	-0.0434673	-0.0497366	-0.137804	-0.052148	0.205595	0.0829653	-0.0146985	0.430857
MAGRANGEAS_MULTIPLE_MYELOMA_IGLL_VS_IGLK_UP	-0.020357	-0.0209195	-0.0914159	0.0709864	0.012723	0.0389201	-0.0690463	0.429817
TONKS_TARGETS_OF_RUNX1_RUNX1T1_FUSION_MONOCYTE_UP	0.00665032	0.00149133	0.0141217	0.0517663	0.0463477	0.0554464	-0.0277641	0.429778
GROSS_HYPOXIA_VIA_ELK3_AND_HIF1A_UP	-0.0793961	-0.0237837	-0.105943	0.110284	0.177149	0.0567695	0.0398036	0.429492
YAO_TEMPORAL_RESPONSE_TO_PROGESTERONE_CLUSTER_10	0.00834612	0.00157132	0.0503356	0.0157827	0.0183024	0.0674341	-0.0142206	0.429235
REACTOME_CIRCADIAN_CLOCK	-0.0506805	-0.043929	-0.0351726	0.114772	0.0209709	0.0607672	0.00938522	0.429151
GEISS_RESPONSE_TO_DSRNA_UP	-0.175991	0.015725	-0.0667926	0.12303	0.128491	-0.021354	0.0182549	0.428843
GRAHAM_NORMAL_QUIESCENT_VS_NORMAL_DIVIDING_DN	0.149677	0.155416	0.0287709	0.04702	0.0811559	0.184198	0.0189931	0.428438
REACTOME_RIPK1_MEDIATED_REGULATED_NECROSIS	-0.120568	-0.00767606	0.0197072	0.0427664	0.0330546	-0.00767494	0.021596	0.428378
KORKOLA_YOLK_SAC_TUMOR	0.0616732	-0.132523	-0.238057	0.189026	0.0435338	0.303612	-0.0729277	0.428223
LI_WILMS_TUMOR	-0.00219959	-0.0581289	-0.0132399	-0.29109	0.0869916	0.238591	0.0347992	0.427339
DAZARD_RESPONSE_TO_UV_SCC_UP	-0.024613	0.00481644	-0.042613	0.0350006	0.0642103	0.0141407	0.011647	0.426927
PID_CERAMIDE_PATHWAY	-0.0802884	0.0437144	-0.0888133	0.0580508	0.100486	-0.00748226	0.0514958	0.426873
ZHAN_MULTIPLE_MYELOMA_CD1_AND_CD2_UP	0.0102641	-0.00677282	-0.0573634	-0.0466991	0.0218634	0.0353714	-0.0381837	0.426805
MANNE_COVID19_ICU_VS_HEALTHY_DONOR_PLATELETS_UP	-0.0685443	0.0305477	0.0459377	0.00206785	0.0781748	0.00957887	-1.03829e-05	0.426596
NAGASHIMA_NRG1_SIGNALING_UP	-0.163948	0.00387737	-0.144832	0.118447	0.12508	-0.0170033	0.0572502	0.426227
MOHANKUMAR_HOXA1_TARGETS_UP	-0.0210979	-0.00900685	0.0189764	-0.0196848	-0.0368693	0.0286987	0.00185919	0.426191
SESTO_RESPONSE_TO_UV_C1	-0.0272953	-0.00519979	-0.0545269	0.0731133	0.0766881	0.0336341	0.00815787	0.426106
PID_AVB3_OPN_PATHWAY	-0.0325427	-0.00734253	-0.0676905	0.0503816	0.0434706	0.0126908	0.00376547	0.426095
CHEN_LVAD_SUPPORT_OF_FAILING_HEART_DN	0.0082368	-0.000923089	-0.109643	0.0568986	-0.0995509	0.0948537	0.0260242	0.425733
WILLIAMS_ESR1_TARGETS_UP	-0.00495053	-0.02498	-0.00478902	0.000140047	-0.102782	0.0946838	-0.024362	0.424876
KEGG_PYRIMIDINE_METABOLISM	0.0673464	0.0144142	-0.0243634	-0.0569522	-0.0199438	0.15572	0.0471902	0.424803
REACTOME_ROS_AND_RNS_PRODUCTION_IN_PHAGOCYTES	-0.028995	0.00463768	-0.0311617	0.0452263	0.0366455	0.0119883	0.0310535	0.424652
REACTOME_UNFOLDED_PROTEIN_RESPONSE_UPR	0.00796381	0.00462076	-0.0355456	0.0297141	0.000693507	0.0268381	0.00590266	0.424246
SCHLOSSER_SERUM_RESPONSE_UP	-0.0692049	0.00653027	-5.32006e-05	0.0394222	0.00880305	-0.00514534	0.0290819	0.423028
PELLICCIOTTA_HDAC_IN_ANTIGEN_PRESENTATION_UP	0.0277046	-0.00867672	0.000510761	0.00012715	0.0146196	0.0660696	0.00522531	0.422418
AMIT_SERUM_RESPONSE_480_MCF10A	-0.163608	0.135784	-0.0355356	0.0271392	0.148719	-0.0510647	0.0335726	0.422403
RODWELL_AGING_KIDNEY_DN	0.0127297	0.0064127	-0.0394011	0.018192	0.00065572	0.028694	0.0098921	0.421928
DACOSTA_ERCC3_ALLELE_XPCS_VS_TTD_DN	0.0480824	-0.0325368	-0.00468586	-0.0333199	0.0114161	0.142593	-0.00160179	0.421891
REACTOME_TOLL_LIKE_RECEPTOR_TLR1_TLR2_CASCADE	-0.0646115	-0.0178453	-0.00898283	0.0428106	0.0328127	0.0100974	0.0371112	0.421822
GRAHAM_CML_DIVIDING_VS_NORMAL_QUIESCENT_UP	0.0845924	0.0915724	-0.0303231	0.054579	0.0101967	0.109124	-0.000145451	0.42173
REACTOME_SYNTHESIS_OF_BILE_ACIDS_AND_BILE_SALTS	0.165397	0.043007	-0.376601	-0.984481	-0.387518	0.684136	-0.439367	0.421583
WP_IL6_SIGNALING_PATHWAY	-0.112455	0.020327	-0.04281	0.138075	0.046726	0.00903841	0.0564685	0.421366
REACTOME_CYTOKINE_SIGNALING_IN_IMMUNE_SYSTEM	-0.0325628	-0.00511349	-0.013265	0.050882	0.0475403	0.0166451	0.0112354	0.421252
BILANGES_SERUM_SENSITIVE_GENES	-0.0305154	-0.00495	-0.00267364	-0.0250437	0.0164993	0.00223529	0.0196442	0.421028
MOREAUX_MULTIPLE_MYELOMA_BY_TACI_DN	0.0284738	0.00286493	0.0402882	-0.0156326	-0.0241669	0.112145	-0.0432513	0.420801
PID_IL2_STAT5_PATHWAY	-0.0327195	-0.0765697	-0.226322	-0.118303	0.0842559	0.0515637	-0.0511941	0.420786
RAMALHO_STEMNESS_UP	-0.00290687	-0.0137021	0.0252194	-0.0435541	-0.00367199	0.0551246	-0.0192142	0.420427
TURASHVILI_BREAST_NORMAL_DUCTAL_VS_LOBULAR_UP	-0.0320931	-0.033369	-0.0288418	0.0208406	0.0179983	0.013841	0.0105901	0.418562
WP_3Q29_COPY_NUMBER_VARIATION_SYNDROME	-0.0225021	0.0312884	-0.0556353	-0.0288488	-0.0322169	0.0168303	0.062986	0.417677
PARK_TRETINOIN_RESPONSE_AND_RARA_PLZF_FUSION	-0.0700155	-0.120629	-0.130016	0.125638	0.142161	0.110713	-0.0347159	0.417596
BROWN_MYELOID_CELL_DEVELOPMENT_DN	-0.00377263	0.0328995	0.0300176	-0.0068994	0.00737313	0.01852	-0.00703836	0.417232
MCCLUNG_CREB1_TARGETS_DN	-0.0659147	-0.0187934	-0.015866	-0.114593	-0.0146066	0.0309035	0.0627637	0.416582
MARKEY_RB1_CHRONIC_LOF_UP	-0.00158943	-0.02875	-0.0036704	0.100949	-0.0203762	0.100004	0.0124386	0.416529
LENAOUR_DENDRITIC_CELL_MATURATION_DN	-0.00933042	-0.0132451	-0.122436	0.0840018	0.0610149	0.0596396	0.0272791	0.41603
DUTERTRE_ESTRADIOL_RESPONSE_24HR_UP	0.0994675	0.0889358	0.0909305	0.0429888	-0.0443215	0.217569	-0.0127594	0.415441
PID_ENDOTHELIN_PATHWAY	-0.0596832	0.0260124	-0.0188118	-0.0173789	0.00896429	-0.0155456	0.0449689	0.41488
REACTOME_RHOF_GTPASE_CYCLE	0.0215372	-0.0270993	-0.0140624	-0.00321265	-0.00200191	0.0775697	-0.0468996	0.414781
WP_AMPACTIVATED_PROTEIN_KINASE_AMPK_SIGNALING	0.0348066	-0.0453473	0.00301624	-0.202657	-0.116438	0.238426	-0.102476	0.414544
SMID_BREAST_CANCER_LUMINAL_A_UP	-0.127943	-0.0565105	-0.201076	0.111326	0.134511	0.0347131	0.0899675	0.414488
WORSCHECH_TUMOR_EVASION_AND_TOLEROGENICITY_UP	-0.130518	0.0235608	-0.14887	0.367998	-0.0293656	0.100343	-0.0387931	0.414397
GRAESSMANN_RESPONSE_TO_MC_AND_DOXORUBICIN_DN	-0.0140686	-0.000394849	0.0225853	0.00494604	-0.0285982	0.0268474	-0.0197963	0.413545
REACTOME_REGULATION_OF_BETA_CELL_DEVELOPMENT	-0.0530403	-0.00306918	-0.0505036	-0.141808	0.00366352	0.000387623	-0.00987133	0.413186
WP_MESODERMAL_COMMITMENT_PATHWAY	-0.0621021	0.0166669	-0.051881	0.0344097	0.0699415	-0.0093791	0.0279718	0.41277
PICCALUGA_ANGIOIMMUNOBLASTIC_LYMPHOMA_DN	-0.212529	0.0269398	-0.123425	0.149403	0.123748	-0.040255	0.0644138	0.412754
ZHONG_SECRETOME_OF_LUNG_CANCER_AND_FIBROBLAST	-0.00224719	0.0122473	-0.0313499	0.025792	0.030359	0.0117194	0.00479751	0.411783
LEIN_CHOROID_PLEXUS_MARKERS	0.0247546	-0.0333334	-0.0839248	0.102264	-0.0208475	0.117747	-0.021008	0.411756
REACTOME_PYRUVATE_METABOLISM	0.019059	-0.0299195	-0.0113136	-0.0287467	-0.0206126	0.0798177	-0.0400585	0.411455
DORN_ADENOVIRUS_INFECTION_48HR_DN	-0.0652329	0.00757778	-0.0844664	0.0657908	0.1211	0.0169842	0.0506833	0.411043
BURTON_ADIPOGENESIS_PEAK_AT_2HR	-0.210155	-0.00117419	-0.17908	0.202951	0.172238	-0.00430846	0.0877063	0.409777
SHIN_B_CELL_LYMPHOMA_CLUSTER_2	-0.109791	0.0398124	-0.201957	0.0665005	0.0213416	-0.020875	0.0933489	0.409255
MCCABE_BOUND_BY_HOXC6	-0.0190901	0.00831099	-0.0615163	0.018896	-0.0252643	0.00153845	0.0113392	0.408571
WP_WHITE_FAT_CELL_DIFFERENTIATION	-0.338755	-0.0165849	-0.225659	0.112228	0.0301148	-0.109109	0.11049	0.408017
SEIDEN_ONCOGENESIS_BY_MET	0.0104971	-0.0059147	-0.0653273	-0.0302999	0.0231035	0.0316247	-0.000173461	0.407966
WP_MAMMARY_GLAND_DEVELOPMENT_PATHWAY_PREGNANCY_AND_LACTATION_STAGE_3_OF_4	-0.00748033	0.0368176	-0.188111	0.107747	0.140385	0.0667829	0.0415008	0.407955
FLECHNER_BIOPSY_KIDNEY_TRANSPLANT_REJECTED_VS_OK_DN	0.0177031	-0.00567617	-0.0210179	-0.00648922	0.00967856	0.0366104	-0.0184143	0.407915
KYNG_RESPONSE_TO_H2O2	-0.0342249	0.0227874	-0.0482502	0.0193516	0.0724855	-0.00124639	0.0132553	0.407586
SHEN_SMARCA2_TARGETS_DN	0.0346502	-0.0170529	-0.144208	0.0231144	0.000682957	0.0899525	0.0118513	0.407138
HEIDENBLAD_AMPLICON_8Q24_DN	-0.00671891	0.00447788	-0.0797052	0.0254969	0.0162957	0.0156037	0.00927456	0.407098
REACTOME_SIGNALING_BY_PTK6	-0.0257716	-0.0027657	0.00517206	-0.00273441	0.0436457	0.00836563	0.00693316	0.406972
BIOCARTA_AT1R_PATHWAY	-0.0775647	0.0249802	-0.0109757	-0.0421626	0.0211868	-0.0150038	0.0556346	0.40691
SHETH_LIVER_CANCER_VS_TXNIP_LOSS_PAM6	-0.0576703	-0.0966536	0.0554235	0.0178065	-0.241709	0.224555	-0.118748	0.406155
CERVERA_SDHB_TARGETS_2	0.0589981	-0.0191722	-0.198839	-0.0246667	0.0216419	0.119355	-0.0448456	0.406042
MAYBURD_RESPONSE_TO_L663536_UP	0.0154127	0.00499965	-0.0230581	-0.00879267	-0.0818039	0.0741975	-0.0655788	0.40597
REACTOME_INACTIVATION_OF_CSF3_G_CSF_SIGNALING	-0.0928422	-0.00237028	-0.0524993	0.0902955	0.130937	0.0139421	0.0374171	0.404958
LEE_AGING_CEREBELLUM_DN	-0.0455195	0.0534782	-0.0511655	0.0917068	0.17831	0.0313363	-0.0311611	0.40436
WP_THYMIC_STROMAL_LYMPHOPOIETIN_TSLP_SIGNALING_PATHWAY	-0.015406	-0.0339903	-0.0533437	0.0611204	0.0382097	0.0430732	-0.00476079	0.403621
REACTOME_FANCONI_ANEMIA_PATHWAY	-0.00875371	-0.00838248	-0.00933989	-0.0088403	0.0632034	0.0275806	0.00215875	0.40294
BOUDOUKHA_BOUND_BY_IGF2BP2	-0.00900731	0.0142069	-0.0190951	-0.0266965	0.0256764	0.00500552	0.0138047	0.402523
REACTOME_DNA_REPAIR	-0.0411001	0.0172313	0.041992	-0.00559779	0.0257367	0.0109412	0.0167289	0.402442
REACTOME_RHO_GTPASES_ACTIVATE_PKNS	-0.025924	0.0251141	-0.0330319	0.0393079	0.0438614	-0.00160014	0.00414227	0.402124
GAVIN_FOXP3_TARGETS_CLUSTER_P6	0.0697333	0.0430002	-0.0606626	0.0801405	0.0357448	0.106355	-0.0240245	0.402121
REACTOME_CELLULAR_SENESCENCE	-0.0709288	-0.0165275	-0.0251012	0.0804372	0.0664647	0.0129407	0.0116531	0.401926
UZONYI_RESPONSE_TO_LEUKOTRIENE_AND_THROMBIN	-0.331558	-0.0239277	-0.169223	0.154894	0.109893	-0.0757113	0.115429	0.401806
CHNG_MULTIPLE_MYELOMA_HYPERPLOID_UP	-0.00481659	-0.00609206	0.00882357	0.00136815	-0.00685009	0.0127733	-0.00219523	0.401747
PID_EPHRINB_REV_PATHWAY	-0.048459	0.0144453	0.0208431	-0.142116	-0.00909944	0.0328977	-0.0189547	0.401698
WP_PATHWAYS_REGULATING_HIPPO_SIGNALING	-0.0165693	-0.00135354	-0.00528034	0.00379793	0.0272625	0.00161092	-0.0160104	0.401645
GAZDA_DIAMOND_BLACKFAN_ANEMIA_ERYTHROID_UP	-0.0349993	0.0998584	0.0348806	-0.0357976	0.114856	0.028922	-0.0937261	0.400579
DORN_ADENOVIRUS_INFECTION_32HR_DN	-0.0712432	0.0139809	-0.0812987	0.0617993	0.109554	0.0076572	0.0637414	0.400459
ZHONG_RESPONSE_TO_AZACITIDINE_AND_TSA_UP	0.00903978	-0.0165119	-0.09244	0.0464416	0.058893	0.0595534	0.0263368	0.399826
AUNG_GASTRIC_CANCER	-0.0234113	0.000512839	-0.0309643	0.0788728	0.0168756	0.025124	0.0124449	0.399645
WP_MELANOMA	-0.0164647	0.0350334	-0.0462359	-0.0214168	0.0523724	0.00855399	0.0457662	0.399612
LEONARD_HYPOXIA	-0.0654305	-0.0438324	-0.0514926	0.112211	0.163901	0.0643303	-0.0289336	0.39937
REACTOME_NUCLEOTIDE_EXCISION_REPAIR	-0.0209784	0.0304591	0.0201625	-0.016363	0.032502	0.0095394	0.0296659	0.399303
SAKAI_CHRONIC_HEPATITIS_VS_LIVER_CANCER_UP	-0.0170619	-0.00527417	0.00407673	0.0108812	0.0549433	0.018881	0.00121406	0.399227
REACTOME_MYD88_INDEPENDENT_TLR4_CASCADE	-0.0708653	-0.00454129	-0.00758974	0.0229021	0.0473698	-0.00538898	0.0343583	0.398762
REACTOME_APC_C_CDC20_MEDIATED_DEGRADATION_OF_CYCLIN_B	-0.0422266	0.0108957	0.00893071	0.0574329	-0.00757742	0.0104143	0.015785	0.398601
XU_GH1_EXOGENOUS_TARGETS_UP	-0.257362	0.0851595	-0.233636	-1.22733	0.132747	0.26218	-0.0044251	0.39813
NIKOLSKY_BREAST_CANCER_16P13_AMPLICON	-0.140435	0.0273041	0.0331434	0.00700942	0.0286528	-0.0311447	0.0265675	0.397561
REACTOME_MITOTIC_PROMETAPHASE	-0.0197278	0.0291314	-0.0186547	0.0598085	0.0555334	0.0108011	-0.00184584	0.396997
VILLANUEVA_LIVER_CANCER_KRT19_UP	-0.0254186	0.0227174	0.0359616	-0.0403725	0.0356472	0.0215039	0.0150792	0.396608
SMIRNOV_RESPONSE_TO_IR_2HR_UP	-0.206493	-0.0589883	-0.106314	0.169154	0.0739973	-0.00609687	0.0630297	0.396429
JAEGER_METASTASIS_UP	-0.0449355	0.014966	-0.0344706	-0.0100911	0.0466969	-0.0198772	-0.00772267	0.395644
BREDEMEYER_RAG_SIGNALING_VIA_ATM_NOT_VIA_NFKB_UP	-0.0411781	-0.057631	0.0433088	0.00765391	-0.00295146	0.0623189	-0.0201563	0.39498
WP_SELENIUM_MICRONUTRIENT_NETWORK	-0.0303721	0.0191315	-0.0570132	0.0673092	0.034011	0.00713658	0.0222674	0.393467
RODRIGUES_THYROID_CARCINOMA_POORLY_DIFFERENTIATED_UP	0.0439472	0.000515141	-0.00217133	-0.0120472	0.012715	0.0940156	-0.0521046	0.393209
PID_AP1_PATHWAY	-0.06598	-0.0145751	-0.12217	0.12798	0.0468769	0.0240366	0.0274531	0.392761
PUJANA_ATM_PCC_NETWORK	0.0033022	0.00804104	0.0252997	0.00512843	0.0169181	0.0304125	-0.0235738	0.391954
GRYDER_PAX3FOXO1_ENHANCERS_IN_TADS	-0.0165402	-0.000947508	-0.00357026	-0.00772032	0.0239368	-0.000412179	-0.000367572	0.391874
NADLER_OBESITY_DN	-0.0317426	0.0137021	-0.00825952	0.000104387	0.0271066	-0.0119789	0.000908932	0.391518
REACTOME_POLYMERASE_SWITCHING_ON_THE_C_STRAND_OF_THE_TELOMERE	-0.0216751	-0.128652	0.188877	-0.30793	-0.380226	0.51158	-0.18595	0.390331
WP_GASTRIC_CANCER_NETWORK_2	-0.0176819	0.01235	-0.0798765	0.0455026	0.0597259	0.0122953	0.00347831	0.38993
ZHOU_TNF_SIGNALING_4HR	-0.0101662	-0.0102701	-0.0307839	0.0223265	0.00758291	0.0132101	0.0173507	0.389712
ACEVEDO_LIVER_CANCER_WITH_H3K27ME3_UP	-0.0068618	-0.0150088	-0.0542106	0.0582062	0.0343771	0.0333416	-0.00488246	0.38958
DANG_REGULATED_BY_MYC_UP	0.0146065	-0.0116903	0.030226	-0.0363413	0.0176758	0.0731168	-0.00712011	0.389419
REACTOME_HCMV_EARLY_EVENTS	-0.0447959	0.0244112	-0.0263012	0.0450293	0.0455857	-0.0025423	0.041605	0.389328
PID_FAS_PATHWAY	0.00401125	-0.0379962	0.0216728	0.0748202	-0.102397	0.148231	-0.0512346	0.389261
WP_PROXIMAL_TUBULE_TRANSPORT	-0.112036	0.0123113	-0.0140756	0.056724	0.0116323	-0.0222615	0.0466729	0.389077
WP_SPINAL_CORD_INJURY	-0.0344484	0.00804763	-0.0782174	0.0497799	0.0618056	0.00776489	0.02951	0.389015
CHESLER_BRAIN_HIGHEST_EXPRESSION	0.00484095	-0.0113223	-0.0120774	-0.023252	0.0388746	0.0320151	-0.00766554	0.388881
BASAKI_YBX1_TARGETS_UP	0.0614234	0.0335709	0.01066	0.0784551	0.0268798	0.0966853	0.0124638	0.388098
NELSON_RESPONSE_TO_ANDROGEN_UP	-0.0193596	-0.0097325	-0.0502801	-0.0259663	-0.00500963	0.0040326	0.0287457	0.387933
WP_ANGIOGENESIS	0.089885	-0.0264645	-0.28576	0.177164	-0.0390267	0.224232	-0.0979291	0.387052
REACTOME_METABOLISM_OF_VITAMINS_AND_COFACTORS	0.059973	0.01101	-0.213545	-0.0324143	0.0656952	0.10546	0.00473185	0.386063
REACTOME_DOWNREGULATION_OF_ERBB2_SIGNALING	-0.09796	0.0138041	-0.00514613	0.0238486	0.0402782	-0.0249805	0.0331298	0.385565
REACTOME_RHO_GTPASES_ACTIVATE_NADPH_OXIDASES	-0.00359005	0.0700329	-0.00438712	-0.0604489	-0.0853779	0.0460018	0.018364	0.385507
DELPUECH_FOXO3_TARGETS_DN	0.0413202	-0.00136556	-0.134063	0.124758	-0.00505816	0.117739	0.0229345	0.384935
PUJANA_BREAST_CANCER_LIT_INT_NETWORK	-0.0400045	0.00481684	0.00931304	0.0500312	0.00266356	0.0181119	0.0489475	0.38454
REACTOME_NOTCH2_ACTIVATION_AND_TRANSMISSION_OF_SIGNAL_TO_THE_NUCLEUS	-0.0504153	-0.0158684	-0.0118194	0.0523788	0.0290641	0.00715569	0.0157352	0.384514
REACTOME_TRANSCRIPTIONAL_REGULATION_OF_GRANULOPOIESIS	-0.118422	-0.0253152	-0.0795903	0.141023	0.0985235	0.01371	0.0504629	0.384451
PID_AURORA_A_PATHWAY	0.00440456	0.0124542	-0.061074	-0.0346375	0.0488461	0.0223933	0.0134455	0.384448
GERHOLD_ADIPOGENESIS_UP	-0.0144976	0.00173596	-0.0372988	0.0373599	0.0671192	0.0173291	-0.0108413	0.383113
WP_FGFR3_SIGNALLING_IN_CHONDROCYTE_PROLIFERATION_AND_TERMINAL_DIFFERENTIATION	-0.245228	-0.0271072	0.0063197	-0.227932	0.164306	-0.00996612	0.091334	0.382811
DELYS_THYROID_CANCER_DN	-0.0507176	0.00498349	-0.0740414	0.0277012	0.0515398	-0.0087411	0.0354524	0.382227
BLANCO_MELO_MERS_COV_INFECTION_MCR5_CELLS_UP	-0.175447	0.013715	-0.0544203	0.159016	0.0955352	-0.014809	0.0816074	0.381358
REACTOME_TRANSPORT_OF_MATURE_MRNAS_DERIVED_FROM_INTRONLESS_TRANSCRIPTS	-0.117001	0.049465	0.0347233	-0.0385316	-0.026116	-0.0197149	0.0589868	0.381346
REACTOME_PLATELET_HOMEOSTASIS	-0.0358064	0.0163572	-0.028682	-0.0267996	0.0859555	-0.000679808	-0.0105264	0.380883
FERNANDEZ_BOUND_BY_MYC	-0.0157507	0.00734499	-0.0139565	0.0221318	0.00647992	-0.00315855	0.0001811	0.380758
LAU_APOPTOSIS_CDKN2A_UP	-0.0673792	0.0104056	-0.15889	0.130264	0.0404404	0.0185707	0.0669855	0.380291
REACTOME_RHOD_GTPASE_CYCLE	0.0237809	-0.029324	-0.0103231	-0.153977	-0.0394239	0.129785	-0.0995555	0.380126
DAZARD_RESPONSE_TO_UV_NHEK_UP	-0.0650688	0.0119077	-0.0358746	0.0350349	0.0336537	-0.0167056	0.036122	0.380013
REACTOME_VISUAL_PHOTOTRANSDUCTION	0.0199761	0.0177749	-0.149761	-0.0445473	0.0774405	0.0473027	0.00821629	0.379386
DARWICHE_PAPILLOMA_RISK_LOW_UP	0.00884171	-0.00466425	-0.00882102	0.018133	0.0428457	0.0339173	-0.0223605	0.378882
ZHOU_CELL_CYCLE_GENES_IN_IR_RESPONSE_24HR	0.165122	0.132298	0.0638202	0.0398157	0.0898273	0.212601	0.0092176	0.378552
RUTELLA_RESPONSE_TO_CSF2RB_AND_IL4_UP	-0.028348	-0.0100076	-0.048302	0.0602888	0.0373175	0.0162789	0.0207341	0.377757
HORIUCHI_WTAP_TARGETS_DN	0.0502947	0.0321074	0.000766168	-0.00836173	0.0371694	0.071176	-0.0199442	0.377617
BROWNE_HCMV_INFECTION_10HR_UP	-0.0337539	0.00703218	-0.0680894	0.107867	0.038908	0.022885	0.0111382	0.377344
PID_CD8_TCR_DOWNSTREAM_PATHWAY	-0.115978	0.0216202	-0.02046	0.0191184	0.0270549	-0.0398147	0.0425834	0.376874
WP_NANOPARTICLE_TRIGGERED_AUTOPHAGIC_CELL_DEATH	-0.0613049	0.0404701	0.0440687	-0.0610115	0.0208369	0.00391869	0.0237954	0.376699
HELLER_HDAC_TARGETS_SILENCED_BY_METHYLATION_UP	-0.0494667	0.0079265	-0.0848318	0.0737099	0.0222746	-0.00337556	0.0210083	0.375767
FRASOR_RESPONSE_TO_SERM_OR_FULVESTRANT_DN	0.0465416	0.0999144	0.0350038	-0.00402381	0.089287	0.0607593	0.0460407	0.374924
SIG_IL4RECEPTOR_IN_B_LYPHOCYTES	-0.0887319	0.0593862	-0.0684226	0.0426858	-0.144313	0.00957708	0.0860252	0.374236
WP_PARKINSONS_DISEASE_PATHWAY	-0.0160893	-0.0369657	0.0607069	0.0495932	-0.0362691	0.101577	-0.0432653	0.374054
ZHONG_SECRETOME_OF_LUNG_CANCER_AND_MACROPHAGE	0.00670007	0.0163795	-0.0449463	0.026563	0.0197829	0.0148635	0.00187759	0.373806
REACTOME_INFLUENZA_INFECTION	-0.00387808	0.00323035	-0.00205745	0.0096129	0.000765552	0.00115707	0.00227809	0.373566
REACTOME_SIGNALING_BY_CSF3_G_CSF	-0.0700769	-0.00237889	-0.0400654	0.0490058	0.121325	0.00858063	0.04067	0.372793
COATES_MACROPHAGE_M1_VS_M2_DN	-0.0376883	-0.0706316	-0.0299014	0.0585038	0.0773529	0.05982	0.00369026	0.372659
SATO_SILENCED_BY_DEACETYLATION_IN_PANCREATIC_CANCER	-0.036639	-0.0963557	-0.20196	0.0477001	0.141779	0.135875	0.181672	0.372332
BLUM_RESPONSE_TO_SALIRASIB_UP	-0.0359937	-0.0133673	-0.0670289	-0.0136469	0.0388852	-0.00485116	0.0251813	0.372287
PID_ALPHA_SYNUCLEIN_PATHWAY	-0.160785	0.0806915	0.0369158	0.0760904	0.0475727	-0.0394562	0.0398902	0.371771
HAHTOLA_SEZARY_SYNDROM_UP	-0.0338434	0.0432104	-0.0474455	0.167189	-0.000704509	0.0408433	-0.0162862	0.371715
WEST_ADRENOCORTICAL_TUMOR_DN	-0.070955	0.0102732	-0.0526519	0.0584919	0.0530716	-0.0155185	0.0301698	0.370367
PRAMOONJAGO_SOX4_TARGETS_UP	-0.0915521	0.00718949	-0.140034	0.168284	0.0753856	0.00389388	-0.00287726	0.370176
DESERT_STEM_CELL_HEPATOCELLULAR_CARCINOMA_SUBCLASS_UP	0.00424321	0.0105388	-0.0347551	0.0325171	0.0550878	0.0223426	-0.00116221	0.370105
GRABARCZYK_BCL11B_TARGETS_DN	0.0129243	0.00270375	-0.00660191	0.0233795	0.000118916	0.0296317	-0.0199737	0.369979
GROSS_HYPOXIA_VIA_HIF1A_DN	-0.0841864	-0.0193753	-0.128846	0.0950092	0.187779	0.0364569	0.0885425	0.369967
WINTER_HYPOXIA_DN	0.138639	-0.184266	-0.515815	0.215447	-0.045927	0.411255	0.00278177	0.36865
REACTOME_ATTENUATION_PHASE	-0.0559975	-0.0139106	0.00960181	0.0430947	-0.0402782	0.017941	0.031782	0.36812
ENK_UV_RESPONSE_EPIDERMIS_UP	0.027871	-0.00721819	-0.00998412	-0.00157862	0.0224547	0.0526326	-0.009529	0.367805
WP_NEOVASCULARISATION_PROCESSES	-0.0548619	0.019671	-0.320698	0.364955	0.00333991	0.128489	0.0853973	0.367534
YANAGIHARA_ESX1_TARGETS	-0.0523626	0.00960311	0.0501889	0.047371	-0.0357853	0.0283477	-0.0601828	0.367353
REACTOME_INTERLEUKIN_10_SIGNALING	-0.0388555	-0.0699684	-0.470424	0.293759	0.399738	0.202187	0.105033	0.367219
REACTOME_SENESCENCE_ASSOCIATED_SECRETORY_PHENOTYPE_SASP	-0.0621136	-0.0112857	-0.0490385	0.0900166	0.0378865	0.00464271	0.0153981	0.366414
REACTOME_INNATE_IMMUNE_SYSTEM	-0.0107403	-0.00184857	-0.0180215	0.027663	0.00750693	0.00637456	0.00855933	0.366133
DARWICHE_SQUAMOUS_CELL_CARCINOMA_DN	-0.0575616	-0.00203953	0.0284276	-0.0195797	0.0177958	-0.00771831	-0.0285774	0.365515
REACTOME_DNA_DOUBLE_STRAND_BREAK_RESPONSE	-0.0894331	0.000378687	0.0611499	-0.0120054	0.0230223	0.00103645	0.00103151	0.364888
HOSHIDA_LIVER_CANCER_LATE_RECURRENCE_DN	0.0194872	-0.0484294	0.0245586	-0.0263026	0.0131001	0.107239	-0.00120917	0.364785
PID_NFAT_TFPATHWAY	-0.159845	0.00796375	-0.0343252	0.137342	0.104451	-0.0187552	0.0539048	0.364718
LIN_NPAS4_TARGETS_UP	-0.0150107	-0.0373164	0.0131171	0.0432995	-0.00494947	0.0525406	-0.0407532	0.364335
MA_MYELOID_DIFFERENTIATION_UP	0.0232492	0.0138386	-0.0872112	0.0629407	0.0216927	0.0470232	-0.0085462	0.363843
RIZKI_TUMOR_INVASIVENESS_3D_UP	-0.00229129	-0.0121004	-0.000870142	-0.00995547	0.0322586	0.0208831	-0.00320072	0.363363
REACTOME_PROTEIN_UBIQUITINATION	-0.0598367	-0.00532002	0.0118907	-0.031467	0.0546882	-0.00349287	0.0121299	0.363274
STEGER_ADIPOGENESIS_DN	-0.00224889	0.0378896	-0.181299	0.103635	0.13123	0.0455248	0.0140738	0.362834
REACTOME_SIGNALING_BY_TGF_BETA_RECEPTOR_COMPLEX	-0.0547946	-0.00288595	-0.0556157	0.0681287	0.0675889	0.000811762	0.0222325	0.362642
ROVERSI_GLIOMA_COPY_NUMBER_DN	0.0376313	-0.00560165	0.0117173	0.0752593	-0.0743911	0.165873	-0.168034	0.362415
GALINDO_IMMUNE_RESPONSE_TO_ENTEROTOXIN	-0.108575	0.0246093	-0.138156	0.142475	0.13705	-0.00383278	0.0762791	0.361733
REACTOME_JNK_C_JUN_KINASES_PHOSPHORYLATION_AND_ACTIVATION_MEDIATED_BY_ACTIVATED_HUMAN_TAK1	-0.0885875	-0.00288369	0.0421037	-0.0491809	-0.000614543	8.19866e-05	0.0375934	0.361653
REACTOME_HIV_TRANSCRIPTION_ELONGATION	-0.0315361	0.0578078	-0.0430112	0.0372549	0.0743897	-0.0056645	0.0410703	0.361158
AFFAR_YY1_TARGETS_DN	0.0528137	0.0400429	-0.00266435	0.0717552	-0.0626083	0.116926	-0.0589038	0.359883
REACTOME_HDR_THROUGH_SINGLE_STRAND_ANNEALING_SSA	0.0978442	0.0723065	0.108822	-0.136931	0.0901892	0.228154	-0.0466168	0.359184
REACTOME_INTERCONVERSION_OF_NUCLEOTIDE_DI_AND_TRIPHOSPHATES	0.0885944	0.014002	0.0706174	-0.00948217	-0.0280771	0.203436	0.00178583	0.359081
JAZAG_TGFB1_SIGNALING_VIA_SMAD4_UP	-0.012082	-0.00461488	0.0182648	0.0470932	0.0337322	0.0334528	-0.0380845	0.359065
MOREAUX_MULTIPLE_MYELOMA_BY_TACI_UP	-0.0401165	-0.0257682	-0.0364895	0.0132872	0.00568163	-0.00898592	0.00828342	0.35837
BOYLAN_MULTIPLE_MYELOMA_D_UP	0.0104219	-0.02473	-0.00559035	-0.0235373	0.0321828	0.0510768	-0.0449891	0.358297
WINTER_HYPOXIA_METAGENE	-0.0303377	0.00379979	-0.0664387	0.0742071	0.093745	0.0163187	-0.0141772	0.358031
MEISSNER_ES_ICP_WITH_H3K4ME3	-0.000504572	6.99626e-07	0.00150368	-0.00134889	-0.000502363	0.00133629	-0.000501458	0.358029
AMIT_EGF_RESPONSE_480_MCF10A	0.0200875	-0.021681	-0.0237708	-0.158881	0.0567257	0.110298	0.00711132	0.357932
ABE_VEGFA_TARGETS_2HR	-0.0642178	0.0222612	-0.223044	0.17247	0.108066	0.0437326	0.130646	0.357183
KONG_E2F3_TARGETS	0.140174	0.131597	0.106423	0.0225627	-0.00961149	0.256684	-0.135975	0.357015
REACTOME_HSF1_ACTIVATION	-0.0204493	-0.0126505	0.025024	0.0488568	-0.0342401	0.0457558	0.0156986	0.356607
WP_CYTOSOLIC_DNASENSING_PATHWAY	-0.0870337	0.0311457	-0.0363741	0.134383	0.0620641	-0.00164636	0.0414903	0.356331
MULLIGHAN_MLL_SIGNATURE_1_UP	0.0144788	-0.00650161	-0.0273223	0.0424983	-0.00892656	0.04218	0.000980428	0.35576
PID_TGFBR_PATHWAY	-0.0228236	0.0253569	-0.0608614	0.0428667	0.101431	0.009508	0.0132093	0.355663
BILANGES_SERUM_RESPONSE_TRANSLATION	-0.0123528	0.00197792	0.00219649	0.0057532	0.0030043	-0.0024703	0.00362751	0.355647
FRASOR_TAMOXIFEN_RESPONSE_UP	0.0262194	-0.027357	-0.0760099	0.0282776	0.0549473	0.0659289	-0.0055626	0.35526
FALVELLA_SMOKERS_WITH_LUNG_CANCER	-0.0712573	0.0210873	-0.0200656	0.100101	-0.0118355	-0.00513768	0.00472334	0.355123
TIAN_TNF_SIGNALING_VIA_NFKB	-0.27118	0.104062	-0.197793	0.31309	0.257027	-0.0510353	0.142555	0.353932
REACTOME_E3_UBIQUITIN_LIGASES_UBIQUITINATE_TARGET_PROTEINS	-0.0403406	0.00352417	0.00196404	-0.0144641	0.0488511	-0.00302025	0.0193666	0.353542
OLSSON_E2F3_TARGETS_UP	0.0216261	0.0645548	-0.161317	0.0823464	0.0164833	0.0345427	-0.0446983	0.35312
EHLERS_ANEUPLOIDY_UP	0.00377737	0.0289989	-0.115691	0.0356126	0.0899848	0.0256927	0.0187147	0.352765
BLANCO_MELO_COVID19_SARS_COV_2_INFECTION_A594_CELLS_DN	-0.0243675	-0.021656	-0.0278236	0.11118	0.0318514	0.0546161	0.0500499	0.352708
KEGG_CHRONIC_MYELOID_LEUKEMIA	-0.0622582	0.00724682	-0.0523351	-0.0483612	0.00862625	-0.00443729	0.0892815	0.352667
RIZ_ERYTHROID_DIFFERENTIATION_HBZ	-0.059263	0.0122575	-0.0305572	0.0052571	0.0311395	-0.0208052	0.0406255	0.350219
PID_FCER1_PATHWAY	-0.0775171	0.00756907	-0.0236304	0.0518162	0.0412108	-0.0112495	0.0584041	0.349328
MAHAJAN_RESPONSE_TO_IL1A_DN	-0.0130164	0.0166011	-0.0362619	0.0536797	0.0344879	0.00818165	0.0135878	0.349282
BURTON_ADIPOGENESIS_7	0.0303337	-0.0100778	-0.0964601	-0.0144914	0.0569872	0.0558925	0.00402351	0.348911
PARK_TRETINOIN_RESPONSE_AND_PML_RARA_FUSION	-0.104115	-0.0175271	-0.0898951	0.137578	0.157215	0.0123121	0.03993	0.348534
MASSARWEH_TAMOXIFEN_RESISTANCE_DN	-0.0107096	-0.0255622	-0.0822072	0.111779	-0.00497081	0.0537226	-0.000786812	0.347337
WP_APOPTOSISRELATED_NETWORK_DUE_TO_ALTERED_NOTCH3_IN_OVARIAN_CANCER	-0.0357736	0.023553	-0.0591855	0.0935522	0.075358	0.0058291	-0.0188118	0.34725
KOHOUTEK_CCNT2_TARGETS	0.0797943	-0.114313	-0.0254355	-0.285258	-0.0328689	0.305892	-0.0470928	0.346989
ALONSO_METASTASIS_UP	0.0125854	0.0178474	-0.0622318	0.0265222	0.0114335	0.0190695	0.00359776	0.346854
DAUER_STAT3_TARGETS_UP	-0.166889	0.0343764	-0.129859	0.173888	0.0997691	-0.0457306	0.0524757	0.346736
BURTON_ADIPOGENESIS_1	-0.146942	0.0229686	-0.192752	0.0466452	0.21098	-0.0306697	0.12247	0.346227
REACTOME_SLC_MEDIATED_TRANSMEMBRANE_TRANSPORT	-0.0372932	-0.0151199	-0.0653986	0.0531448	0.0581293	0.00471505	0.00652892	0.345659
NIKOLSKY_BREAST_CANCER_20Q12_Q13_AMPLICON	-0.00919988	0.00221972	-0.0411211	0.0247233	0.0410599	0.00581275	-0.0225946	0.34561
SCHLESINGER_METHYLATED_DE_NOVO_IN_CANCER	-0.0495707	-0.0687446	-0.0748889	0.0687448	0.103898	0.0451939	0.0260098	0.345501
RHEIN_ALL_GLUCOCORTICOID_THERAPY_UP	-0.0507313	-0.0445303	-0.0949389	0.139823	0.0388378	0.0375844	-0.0229005	0.345382
HOFFMANN_SMALL_PRE_BII_TO_IMMATURE_B_LYMPHOCYTE_DN	-0.0770226	0.0656637	-0.102875	-0.0662378	-0.00371008	-0.0700065	-0.0194714	0.345203
REACTOME_ONCOGENE_INDUCED_SENESCENCE	-0.0747886	-0.0346762	0.0145475	0.0597173	-0.0139959	0.0111689	0.00486595	0.344817
NEMETH_INFLAMMATORY_RESPONSE_LPS_UP	-0.0875507	-0.0352243	-0.0826577	0.114383	0.134136	0.0191374	0.0390828	0.344388
FISCHER_G2_M_CELL_CYCLE	-0.0180062	0.0275445	-0.0337262	-0.0445306	0.0704909	0.00189763	0.00878593	0.344324
BYSTRYKH_HEMATOPOIESIS_STEM_CELL_SCP2_QTL_TRANS	-0.0252718	0.0307987	-0.105007	0.0943458	-0.010609	0.0103483	0.0242489	0.343811
KEGG_NOD_LIKE_RECEPTOR_SIGNALING_PATHWAY	-0.0927709	0.0539551	-0.147947	0.0958468	0.0485056	-0.0315815	0.0798823	0.343763
TIEN_INTESTINE_PROBIOTICS_24HR_DN	-0.021167	-0.000899933	-0.0429714	0.0130812	0.0144409	-0.00696082	0.0127043	0.342403
DACOSTA_UV_RESPONSE_VIA_ERCC3_COMMON_UP	-0.109847	-0.00823256	0.00697102	0.0577557	-0.0163617	-0.0171141	0.0338137	0.342006
BANDRES_RESPONSE_TO_CARMUSTIN_WITHOUT_MGMT_48HR_DN	-0.010467	0.0238469	0.0477256	-0.0845633	0.0447979	0.0477729	-0.0335412	0.341718
BLANCO_MELO_COVID19_SARS_COV_2_LOW_MOI_INFECTION_A594_ACE2_EXPRESSING_CELLS_UP	-0.20174	0.0178957	-0.117526	0.260195	0.170191	-0.0128563	0.103678	0.341674
KIM_WT1_TARGETS_12HR_DN	-0.0238113	0.0101287	-0.0384358	0.0193603	0.0945757	0.00659673	-0.0211438	0.341007
RUAN_RESPONSE_TO_TNF_DN	0.0537171	-0.0543358	-0.0214455	-0.185343	0.0249768	0.175671	-0.0354019	0.340401
RIZ_ERYTHROID_DIFFERENTIATION	-0.0259066	0.0302616	0.0690376	0.0448356	0.079927	0.049467	-0.0850464	0.339307
PID_INSULIN_PATHWAY	-0.0311496	-0.0281835	-0.0339274	-0.186171	0.0242899	0.0608293	0.0428562	0.339237
RAMASWAMY_METASTASIS_DN	-0.0281359	0.036494	-0.113325	0.0761271	0.0890789	0.00722166	0.046621	0.338825
KEGG_METABOLISM_OF_XENOBIOTICS_BY_CYTOCHROME_P450	-0.284106	-0.0401933	-0.144804	0.399795	0.143953	0.0131095	0.130004	0.338226
PETROVA_PROX1_TARGETS_UP	0.158702	0.0220563	0.0500273	0.255675	-0.0580318	0.365421	-0.126016	0.337415
REACTOME_TRANSCRIPTIONAL_REGULATION_BY_VENTX	-0.0730634	0.00932809	-0.0853268	0.0818473	0.0721303	-0.0141634	0.0437912	0.335941
WP_CORTICOTROPINRELEASING_HORMONE_SIGNALING_PATHWAY	-0.0795116	0.0158232	-0.0867433	0.0549504	0.0509641	-0.0268563	0.0557545	0.335671
ROESSLER_LIVER_CANCER_METASTASIS_DN	-0.0111262	0.00182788	-0.0301781	0.0557388	0.10575	0.0308345	-0.00228577	0.335445
BROWNE_HCMV_INFECTION_4HR_UP	-0.139683	-0.0102887	0.00254767	0.254194	0.253767	0.0598851	-0.12928	0.333926
ABE_VEGFA_TARGETS_30MIN	-0.190078	0.0505954	-0.157304	0.094518	0.174795	-0.0475867	0.186855	0.333896
JISON_SICKLE_CELL_DISEASE_DN	-0.0173345	-0.0022815	0.00691836	0.00212899	0.0177137	0.0016053	0.00980009	0.333865
BRUINS_UVC_RESPONSE_EARLY_LATE	-0.0179031	-0.00273645	0.0156976	0.0270811	0.0315079	0.016441	-0.0375358	0.333609
BORCZUK_MALIGNANT_MESOTHELIOMA_UP	0.0109952	0.0101532	0.0105686	-0.0162828	0.029916	0.0259445	0.0131291	0.332849
GARGALOVIC_RESPONSE_TO_OXIDIZED_PHOSPHOLIPIDS_BLACK_UP	-0.0480634	-0.00897013	-0.238416	0.100331	0.0419675	0.00232356	0.00831404	0.332702
SAKAI_CHRONIC_HEPATITIS_VS_LIVER_CANCER_DN	-0.0850209	-0.0129691	-0.146674	0.163818	0.113207	0.0108278	0.0384111	0.331837
WP_NRF2_PATHWAY	-0.0630003	-0.0320677	0.00102393	0.0397393	0.0123913	0.00646616	0.0323149	0.331372
KIM_WT1_TARGETS_8HR_UP	-0.0679284	0.00187133	-0.0800197	0.0669296	0.0546169	-0.0125352	0.0529118	0.331332
GRAHAM_NORMAL_QUIESCENT_VS_NORMAL_DIVIDING_UP	-0.0921202	0.0283436	-0.10646	0.0618244	0.11295	-0.0342871	0.0406802	0.331209
CARD_MIR302A_TARGETS	-0.0828229	0.0234436	-0.0224909	0.0877585	0.0760828	-0.0200159	-0.00496377	0.330332
REACTOME_TRANSCRIPTION_COUPLED_NUCLEOTIDE_EXCISION_REPAIR_TC_NER	-0.00431883	0.0330653	0.0100931	-0.00135755	0.0532695	0.0163992	0.0473159	0.330244
REACTOME_GLYOXYLATE_METABOLISM_AND_GLYCINE_DEGRADATION	0.0281809	-0.0165179	0.0647886	0.123632	-0.072717	0.179621	-0.126203	0.330228
PECE_MAMMARY_STEM_CELL_UP	0.0136061	-0.000508998	-0.00919015	0.0221445	0.00333034	0.0251983	-0.00455059	0.330127
FAELT_B_CLL_WITH_VH3_21_UP	-0.0199994	-0.0405423	0.111162	-0.091199	-0.0483642	0.13323	-0.0743296	0.330092
HOQUE_METHYLATED_IN_CANCER	-0.186836	0.0124097	-0.0505056	0.262137	0.0415896	-0.00679951	0.0619374	0.329448
VANHARANTA_UTERINE_FIBROID_WITH_7Q_DELETION_UP	0.0560412	0.00754834	-0.0133589	-0.0704673	-0.0152005	0.100986	-0.0581609	0.329124
NAKAMURA_ADIPOGENESIS_EARLY_DN	-0.029649	0.0865542	-0.0818885	0.0749695	0.136903	-0.0072115	-0.0271241	0.327829
BONCI_TARGETS_OF_MIR15A_AND_MIR16_1	-0.077915	0.0181129	-0.0432513	0.0440743	0.110807	-0.0215057	0.0209461	0.326596
KEGG_DRUG_METABOLISM_CYTOCHROME_P450	-0.288313	-0.0549411	-0.131482	0.395587	0.141581	0.00890214	0.126848	0.326367
EGUCHI_CELL_CYCLE_RB1_TARGETS	0.184507	0.207606	0.232239	0.325174	0.0804937	0.367939	-0.153316	0.32621
REACTOME_CARBOXYTERMINAL_POST_TRANSLATIONAL_MODIFICATIONS_OF_TUBULIN	-0.102932	0.0435153	-0.138147	0.0792297	0.0233214	-0.00140075	0.196811	0.32537
WP_VEGFAVEGFR2_SIGNALING_PATHWAY	-0.0230482	0.0050029	-0.0268782	0.0190256	0.0408627	-0.00570171	0.00579015	0.324857
REACTOME_TNFR1_INDUCED_NFKAPPAB_SIGNALING_PATHWAY	-0.111986	0.00561451	-0.0227272	0.042936	0.0230711	-0.032469	0.0637964	0.324784
FONTAINE_FOLLICULAR_THYROID_ADENOMA_DN	-0.0255729	-0.0305617	0.0332666	0.0125808	0.0198361	0.031218	-0.0157956	0.324111
WP_NRF2ARE_REGULATION	-0.10348	0.0257563	-0.166302	0.0364517	0.0880596	-0.0521213	0.0602361	0.32377
REACTOME_MEIOTIC_RECOMBINATION	-0.0240515	0.068377	0.051781	-0.0659446	0.0708379	0.0297093	0.0584108	0.322953
WP_NOTCH_SIGNALING_PATHWAY_NETPATH	-0.0409218	-0.0195684	-0.0727133	0.0960305	0.0127313	0.0182234	0.0367139	0.322671
ROSS_AML_WITH_MLL_FUSIONS	0.00143277	-0.00282655	0.006326	-0.0345162	0.00508245	0.0202972	-0.0130305	0.322585
PID_IGF1_PATHWAY	-0.00890623	0.0255258	-0.0480699	-0.0268831	0.0611889	0.00154025	0.0181491	0.322483
ENK_UV_RESPONSE_KERATINOCYTE_UP	-0.0310117	0.0127249	-0.0142176	0.0223636	0.0185431	-0.00889423	0.0268999	0.322373
SHIN_B_CELL_LYMPHOMA_CLUSTER_3	-0.0463238	0.0356853	-0.162937	0.192169	0.213683	0.0339061	-0.00202606	0.322322
MCBRYAN_PUBERTAL_BREAST_4_5WK_DN	-0.02557	0.0224799	-0.0143723	0.0365274	0.020652	-0.00900313	0.00719846	0.321713
WP_HIPPOYAP_SIGNALING_PATHWAY	-0.0725975	0.0224442	-0.0732125	0.19075	0.0239685	0.0111724	-0.102226	0.321684
LOPEZ_MBD_TARGETS	-0.00321388	0.0114282	-0.0157461	0.0148747	0.0224621	0.00197941	0.0095035	0.321266
CREIGHTON_ENDOCRINE_THERAPY_RESISTANCE_5	0.0222798	0.00350065	-0.0693214	-0.0163501	0.0243398	0.0266448	-0.0115757	0.321013
IGARASHI_ATF4_TARGETS_DN	-0.0597	0.0241132	-0.0358266	0.0934058	-0.0233238	-0.0137512	-0.0256612	0.320042
MASSARWEH_RESPONSE_TO_ESTRADIOL	-0.0756179	-0.0147823	-0.0785465	0.045888	0.125209	-0.00773065	0.0395618	0.319877
BLANCO_MELO_COVID19_SARS_COV_2_INFECTION_A594_ACE2_EXPRESSING_CELLS_RUXOLITINIB_UP	-0.173613	0.0206681	-0.0948503	0.174024	0.127337	-0.0456388	0.0576528	0.319834
LINDGREN_BLADDER_CANCER_CLUSTER_3_UP	0.0775907	0.018842	0.0161298	0.046385	0.0620678	0.109523	0.0142908	0.319126
KIM_ALL_DISORDERS_CALB1_CORR_DN	0.0147397	0.0616119	-1.18443	0.0944954	-0.015208	0.10359	0.145585	0.318488
CROONQUIST_NRAS_SIGNALING_DN	0.0585516	0.135984	0.06935	0.0534535	0.164485	0.0746566	0.0438121	0.317432
KEGG_NICOTINATE_AND_NICOTINAMIDE_METABOLISM	0.182137	-0.23204	-0.221753	-0.477377	-0.304413	0.511621	-0.170276	0.317429
GROSS_HYPOXIA_VIA_ELK3_UP	0.0263821	0.0205562	0.0103416	0.0170477	0.0221419	0.039495	-0.0295865	0.316897
REACTOME_TRANSPORT_OF_VITAMINS_NUCLEOSIDES_AND_RELATED_MOLECULES	0.0142792	-0.0325044	0.00341971	-0.0824285	0.0351508	0.0780263	0.0139928	0.316782
REACTOME_EXTENSION_OF_TELOMERES	0.0679137	-0.000443868	0.195566	0.00016698	-0.16631	0.323116	-0.134514	0.316018
REACTOME_MISCELLANEOUS_TRANSPORT_AND_BINDING_EVENTS	0.179294	-0.148181	-0.563369	-0.542055	0.0408403	0.344113	-0.0399244	0.315668
KEGG_TYROSINE_METABOLISM	0.0376762	-1.93524e-05	-0.0137387	0.138656	-0.0105504	0.107817	-0.00732728	0.314982
BROWNE_HCMV_INFECTION_16HR_UP	-0.157679	-0.045171	0.104143	-0.0981142	0.0196497	-0.000264481	-0.0401447	0.314954
REACTOME_TRIGLYCERIDE_METABOLISM	0.0586542	-0.0255272	0.0420127	-0.106857	-0.0845558	0.185407	-0.00475558	0.314708
REACTOME_TRANSPORT_TO_THE_GOLGI_AND_SUBSEQUENT_MODIFICATION	0.0448002	0.00755494	-0.0595843	-0.0488711	0.0153191	0.0572352	-0.011611	0.314402
REACTOME_ENERGY_DEPENDENT_REGULATION_OF_MTOR_BY_LKB1_AMPK	0.091906	0.0395973	-0.131195	-0.0310496	-0.0950968	0.135136	0.0518786	0.314041
WP_VITAMIN_D_RECEPTOR_PATHWAY	-0.013105	-0.00368648	-0.130957	-0.0128487	0.0816691	0.00894514	0.0253607	0.313828
COATES_MACROPHAGE_M1_VS_M2_UP	-0.0390192	0.0428285	0.0402718	-0.090235	-0.0565138	0.0120882	-0.0652822	0.313326
BUYTAERT_PHOTODYNAMIC_THERAPY_STRESS_DN	0.0210088	0.0116175	0.0228226	0.0444122	-0.0255275	0.0597931	-0.0232032	0.313223
GRADE_COLON_AND_RECTAL_CANCER_DN	-0.0126203	0.0343277	-0.282084	-0.11784	0.0303709	0.0112096	0.0963021	0.312705
REACTOME_ESTROGEN_DEPENDENT_GENE_EXPRESSION	-0.0866764	0.0158725	-0.0121795	0.05713	0.0322684	-0.0313919	0.0127297	0.312428
WP_ZINC_HOMEOSTASIS	0.0597277	-0.122012	-0.221299	0.190126	0.034612	0.198653	-0.211305	0.312211
CHANGOLKAR_H2AFY_TARGETS_DN	0.0368665	-0.0334825	0.0845187	0.0227662	-0.0496308	0.17034	-0.101256	0.310897
ZHENG_IL22_SIGNALING_DN	-0.164091	-0.101375	-0.0582778	0.0289971	0.0592431	-0.042683	-0.241415	0.310148
WANG_METHYLATED_IN_BREAST_CANCER	-0.153274	0.0237374	-0.0956585	0.121061	0.111795	-0.0593926	0.0384891	0.310144
KAUFFMANN_DNA_REPAIR_GENES	0.00826973	0.0458695	0.0626693	-0.01282	0.0241144	0.0410185	-0.0112167	0.309948
REACTOME_OTHER_INTERLEUKIN_SIGNALING	-0.034124	-0.091478	-0.0133502	0.302088	0.157835	0.168851	-0.0359202	0.309877
SARTIPY_NORMAL_AT_INSULIN_RESISTANCE_UP	-0.140247	-0.0147718	-0.0348929	0.0976013	0.126133	-0.0211719	0.0710164	0.309635
IVANOVA_HEMATOPOIESIS_LATE_PROGENITOR	0.0416381	-0.00139104	-0.0145075	-0.0393982	-0.0190295	0.0717255	-0.0467205	0.309538
NGUYEN_NOTCH1_TARGETS_DN	-0.0654041	0.0393416	-0.121345	0.148957	0.0544426	-0.0166503	-0.0019381	0.309144
KEGG_RIG_I_LIKE_RECEPTOR_SIGNALING_PATHWAY	-0.19174	-0.0119563	0.0205721	0.233945	-0.0581142	0.00152082	-0.0027123	0.308143
REACTOME_METABOLISM_OF_NUCLEOTIDES	0.0750605	-0.0249017	0.0148467	-0.0578311	-0.0297861	0.163603	0.00732403	0.30793
PARK_HSC_MARKERS	-0.0871262	-0.0153548	0.0386524	0.0807659	0.118342	0.0147051	-0.0231572	0.307626
MAHAJAN_RESPONSE_TO_IL1A_UP	-0.0858729	-0.00385868	-0.159483	0.245809	0.102038	0.0225698	0.0297635	0.307322
REACTOME_GLYCOSAMINOGLYCAN_METABOLISM	0.0552062	0.013666	-0.13927	0.050023	0.00306614	0.0672318	-0.0568329	0.307148
KORKOLA_TERATOMA	-0.0749071	0.0142555	-0.0577343	0.134957	0.0255863	-0.0120967	-0.00929307	0.307117
GARGALOVIC_RESPONSE_TO_OXIDIZED_PHOSPHOLIPIDS_BLUE_UP	-0.133263	0.0109182	-0.016108	0.0750104	0.0489279	-0.0472549	0.024008	0.306421
GARGALOVIC_RESPONSE_TO_OXIDIZED_PHOSPHOLIPIDS_GREEN_UP	-0.156348	0.0392883	0.124127	0.0376812	-0.01616	-0.00968867	0.0075386	0.305788
WP_CALCIUM_REGULATION_IN_THE_CARDIAC_CELL	-0.027687	0.0162262	-0.0254845	0.0343479	0.0392483	-0.00980883	0.0104858	0.305632
JI_METASTASIS_REPRESSED_BY_STK11	0.0165781	-0.172308	-0.274668	-0.192715	0.192729	0.196919	0.171767	0.305573
REACTOME_RAF_INDEPENDENT_MAPK1_3_ACTIVATION	-0.283965	-0.0907319	0.038519	-0.133505	0.00841108	-0.00536465	0.232588	0.305087
REACTOME_HDMS_DEMETHYLATE_HISTONES	-0.40262	-0.0190686	-0.0812951	0.186421	0.364643	-0.12302	0.0173819	0.304679
REACTOME_B_WICH_COMPLEX_POSITIVELY_REGULATES_RRNA_EXPRESSION	-0.0389781	0.0243946	-0.00121092	0.0729513	0.0557456	-0.000438973	0.0139465	0.304436
REACTOME_RAB_GEFS_EXCHANGE_GTP_FOR_GDP_ON_RABS	-0.011215	0.00178051	0.0170811	-0.0842714	-0.0407494	0.0348628	-0.00252036	0.304245
WP_HUMAN_THYROID_STIMULATING_HORMONE_TSH_SIGNALING_PATHWAY	-0.0368796	0.0158187	-0.0315446	0.0531808	0.0423049	-0.00542141	0.0391417	0.303316
WP_DNA_IRDAMAGE_AND_CELLULAR_RESPONSE_VIA_ATR	0.0131634	-0.00195493	0.166086	0.0617745	-0.0389266	0.175252	-0.0443008	0.302803
YU_BAP1_TARGETS	0.087849	0.0548882	-0.00288573	0.0403038	0.0124779	0.130451	-0.136762	0.302785
VANHARANTA_UTERINE_FIBROID_DN	-0.180411	-0.00482849	-0.137767	0.111898	0.151015	-0.0535649	0.120624	0.302627
GRAHAM_CML_QUIESCENT_VS_NORMAL_DIVIDING_UP	-0.242921	0.0354735	-0.0689113	0.118378	0.113723	-0.102239	0.0675784	0.301344
NOUSHMEHR_GBM_SILENCED_BY_METHYLATION	0.0591133	-0.0289548	-0.124155	-0.0250215	-0.0253742	0.0958655	0.0228824	0.300986
WP_IL5_SIGNALING_PATHWAY	-0.0806284	0.0141391	-0.0304698	0.0522784	0.036162	-0.028846	0.0440688	0.300503
PID_TXA2PATHWAY	-0.0149801	0.0281677	-0.0286663	-0.0223686	0.0154675	-0.0136997	0.0103757	0.299985
BROWNE_HCMV_INFECTION_18HR_UP	-0.0279853	-0.0156702	0.0224076	-0.0364086	0.0256076	0.0118652	-0.0015927	0.29981
CHEN_LVAD_SUPPORT_OF_FAILING_HEART_UP	-0.0801364	-0.0134735	-0.158579	0.170705	0.103951	0.00133488	0.0325351	0.29963
MODY_HIPPOCAMPUS_NEONATAL	0.0496544	0.0112574	-0.00299851	-0.000397948	0.0314423	0.0661555	0.0186049	0.299501
WP_OXIDATIVE_DAMAGE	0.0193689	-0.0438366	0.010493	0.0619594	-0.0506367	0.105198	-0.0675799	0.298725
MIKKELSEN_IPS_ICP_WITH_H3K4ME3_AND_H327ME3	0.00715219	-0.214883	0.0434538	-0.268196	0.0363733	0.268965	-0.0761221	0.298194
BLANCO_MELO_BRONCHIAL_EPITHELIAL_CELLS_INFLUENZA_A_DEL_NS1_INFECTION_DN	0.20854	0.236853	0.0980648	-0.26939	-0.39817	0.430665	-0.196716	0.297735
REACTOME_RHOBTB1_GTPASE_CYCLE	-0.0454766	0.00548864	0.0130036	0.0614056	0.0468261	0.000376191	-0.0179412	0.297417
DARWICHE_PAPILLOMA_RISK_HIGH_UP	-0.000521908	-0.0012753	-0.00608593	0.0285464	0.0478437	0.0194505	-0.0247242	0.297359
YAN_ESCAPE_FROM_ANOIKIS	-0.334168	-0.00369468	-0.100603	0.323239	0.169753	-0.0858495	0.0771223	0.297052
BURTON_ADIPOGENESIS_PEAK_AT_24HR	0.0910878	0.0441377	0.0660422	0.144898	0.12585	0.184349	-0.141762	0.296578
BHATI_G2M_ARREST_BY_2METHOXYESTRADIOL_UP	0.0114918	-0.00095179	-0.00874291	0.0732008	0.0899814	0.0500645	-0.024179	0.296191
VALK_AML_CLUSTER_2	-0.0968963	0.00570709	-0.269839	0.119458	0.0784535	-0.0310371	0.0976917	0.294877
REACTOME_GAP_JUNCTION_ASSEMBLY	-0.151323	0.0419733	-0.152073	0.193368	0.0328944	-0.0242568	0.188776	0.294165
MARSON_BOUND_BY_FOXP3_UNSTIMULATED	0.000556801	-0.00121512	-0.0143389	-0.0191981	0.0212878	0.00661364	-0.00129324	0.293457
KAYO_CALORIE_RESTRICTION_MUSCLE_DN	0.0228605	0.00907275	-0.0408845	0.0476414	0.035662	0.0330397	-0.0171388	0.292769
REACTOME_ACTIVATION_OF_ATR_IN_RESPONSE_TO_REPLICATION_STRESS	0.0468069	0.376817	0.367271	-0.229879	-0.823769	0.524528	-0.266063	0.292562
REACTOME_SIGNALING_BY_TGFB_FAMILY_MEMBERS	-0.0582747	0.00437313	-0.0441504	0.0585331	0.0554719	-0.017363	0.028518	0.292458
ZWANG_CLASS_2_TRANSIENTLY_INDUCED_BY_EGF	-0.0754287	-0.00197342	-0.101279	0.0420466	0.165053	-0.0104178	0.0629741	0.291678
LEE_CALORIE_RESTRICTION_MUSCLE_UP	0.0130092	-0.0118539	0.020142	-0.00864895	-0.0505933	0.062659	0.00408814	0.290184
REACTOME_SIGNALING_BY_FGFR3	-0.0483996	0.00918527	0.0312097	-0.0226225	0.0213069	-0.00617702	0.0179733	0.290014
WOO_LIVER_CANCER_RECURRENCE_UP	-0.0138748	0.00761859	-0.0900275	0.0692374	0.081749	0.0106482	0.0146569	0.289841
COULOUARN_TEMPORAL_TGFB1_SIGNATURE_DN	-0.0207793	-0.0291311	-0.0661651	-0.0240872	-0.0322577	0.0142054	0.0525803	0.288518
FLECHNER_BIOPSY_KIDNEY_TRANSPLANT_OK_VS_DONOR_UP	-0.00418323	-0.000456784	-0.00594395	0.00533143	0.0113364	-0.000240725	-0.00194561	0.288378
WP_DNA_DAMAGE_RESPONSE_ONLY_ATM_DEPENDENT	-0.0511972	0.0176795	-0.0482869	0.01397	0.0587099	-0.0237937	0.0413416	0.287747
PID_BARD1_PATHWAY	-0.0114187	0.0109424	0.052548	-0.00145168	-0.00623593	0.030043	-0.0284117	0.28743
HARRIS_BRAIN_CANCER_PROGENITORS	0.0535179	0.0121971	-0.427064	0.179399	-0.0173869	0.0929278	0.0106642	0.287008
REACTOME_TRANSPORT_OF_THE_SLBP_DEPENDANT_MATURE_MRNA	-0.108017	0.0541233	0.0283771	-0.0238278	-0.00882149	-0.0348839	0.0749974	0.286806
KUMAR_TARGETS_OF_MLL_AF9_FUSION	-0.00561049	0.00177394	-0.0610008	0.0691737	0.0410691	0.0160641	0.00974704	0.286226
BURTON_ADIPOGENESIS_PEAK_AT_16HR	0.0142698	-0.0950989	0.0173701	0.147596	0.0402233	0.160776	0.0523492	0.286189
WP_INITIATION_OF_TRANSCRIPTION_AND_TRANSLATION_ELONGATION_AT_THE_HIV1_LTR	-0.0837949	-0.00959842	-0.130289	0.0538339	0.0795107	-0.0215618	0.0984968	0.285703
WP_PHOTODYNAMIC_THERAPYINDUCED_AP1_SURVIVAL_SIGNALING	-0.0517491	-0.00606302	-0.0587248	0.0600436	0.103742	-0.00279634	0.0371604	0.285665
HOFMANN_MYELODYSPLASTIC_SYNDROM_LOW_RISK_DN	-0.0346358	0.0303803	0.0141613	-0.0272037	0.0768806	-0.00211124	0.0261963	0.285189
FAELT_B_CLL_WITH_VH3_21_DN	0.0400724	-0.00931495	-0.0586333	-0.0486548	0.0492987	0.0560225	-0.0136087	0.283892
REACTOME_SIGNALING_BY_EGFR_IN_CANCER	-0.00770432	-0.0370023	-0.0295966	-0.0167385	0.0377946	0.0336155	0.0444007	0.283876
WP_TRANSSULFURATION_AND_ONE_CARBON_METABOLISM	0.0344252	-0.0147862	0.149842	-0.0144617	-0.322704	0.296378	-0.240488	0.283841
RUTELLA_RESPONSE_TO_HGF_UP	-0.0153507	0.00102704	-0.0814994	0.0839664	0.0429351	0.0111212	0.00967761	0.28384
PID_TOLL_ENDOGENOUS_PATHWAY	-0.00679963	0.0145462	0.0120914	-0.0027995	0.000718463	0.00088636	-0.0142799	0.28377
GROSS_HYPOXIA_VIA_ELK3_DN	-0.0660473	-0.0139595	-0.108736	0.130013	0.1449	0.0065133	0.0387073	0.283763
WALLACE_PROSTATE_CANCER_RACE_DN	0.0196499	0.0137285	0.00611424	0.0235515	-0.0762523	0.0627559	-0.0651916	0.283261
KRASNOSELSKAYA_ILF3_TARGETS_DN	0.081641	-0.0160532	0.00610445	-0.267608	-0.338465	0.280286	-0.109416	0.283217
VILIMAS_NOTCH1_TARGETS_UP	-0.173744	-0.0191909	0.0456017	0.123317	0.00523505	-0.0251814	0.027178	0.282945
TAKEDA_TARGETS_OF_NUP98_HOXA9_FUSION_8D_DN	-0.00837797	-0.00449814	-0.124974	0.0590591	0.0369137	0.0107571	0.0190891	0.282552
WP_COMMON_PATHWAYS_UNDERLYING_DRUG_ADDICTION	-0.0342253	0.0172107	-0.0272481	-0.0128413	0.0486743	-0.0125133	0.0425727	0.282154
BERNARD_PPAPDC1B_TARGETS_DN	-0.0422719	-0.0497589	-0.164358	0.169484	0.0606834	0.0272727	-0.060222	0.282092
REACTOME_ION_CHANNEL_TRANSPORT	-0.0404195	-0.042157	-0.0304692	0.0414338	-0.0101452	0.00570005	0.0113714	0.281914
WP_CAMKK2_PATHWAY	-0.131803	0.0611648	-0.0695238	0.12886	0.0903839	-0.0532715	0.0855624	0.281818
UDAYAKUMAR_MED1_TARGETS_DN	-0.0897291	0.000643954	-0.0574754	0.113926	0.0560685	-0.0271499	0.00816661	0.28032
ABE_INNER_EAR	0.0320911	-0.0116194	-0.0567827	0.0483186	0.00706772	0.0544608	0.0136673	0.280292
BIOCARTA_FCER1_PATHWAY	-0.0722955	0.0306604	-0.0285106	-0.0094373	0.0440705	-0.0454577	0.0191594	0.28005
WP_PDGF_PATHWAY	-0.0583384	0.0149704	-0.0591813	0.0793556	0.113566	-0.0148692	0.0112412	0.27983
REACTOME_COPII_MEDIATED_VESICLE_TRANSPORT	0.0576473	-0.00289643	-0.0454286	-0.157267	0.00718939	0.101498	-0.0281519	0.279824
CLASPER_LYMPHATIC_VESSELS_DURING_METASTASIS_DN	0.230005	-0.0734874	-0.488048	-0.0357506	0.180871	0.289707	-0.034672	0.278692
BROWNE_HCMV_INFECTION_4HR_DN	-0.0582421	0.00503746	-0.0378333	0.0828335	0.0526966	-0.0129325	0.024135	0.27811
WP_NEURAL_CREST_DIFFERENTIATION	-0.1098	-0.0261465	-0.0907985	0.110741	0.0529192	-0.0375102	0.0144018	0.276974
LU_EZH2_TARGETS_UP	-0.020433	-0.00155202	0.0291451	0.0399213	-0.0200905	0.0220837	0.00860356	0.276011
ACEVEDO_LIVER_CANCER_DN	-0.0225327	-0.00257131	-0.0307139	0.0455544	0.0255881	-0.00198791	0.00763424	0.275552
PID_TNF_PATHWAY	-0.12039	0.0350373	-0.105155	0.198179	0.132424	-0.0307075	0.0601946	0.275347
PODAR_RESPONSE_TO_ADAPHOSTIN_UP	-0.123373	0.00762547	-0.119267	0.153056	0.0350148	-0.0464589	0.0470127	0.274294
BURTON_ADIPOGENESIS_2	0.0368717	-0.0362514	-0.0773796	0.086097	0.0819379	0.081317	-0.00338623	0.272181
CHIARETTI_T_ALL_REFRACTORY_TO_THERAPY	-0.014482	0.0203212	-0.0489606	-0.0514031	0.128522	0.0128615	0.0351538	0.272072
REACTOME_TRANSLOCATION_OF_SLC2A4_GLUT4_TO_THE_PLASMA_MEMBRANE	-0.0300338	0.0308848	-0.0543672	0.0504209	0.0148366	-0.0145382	0.0382486	0.271104
TIEN_INTESTINE_PROBIOTICS_6HR_DN	0.020165	-0.0139542	-0.0461579	-0.0726187	-0.00241801	0.0330127	-0.0250618	0.270808
PID_IL2_1PATHWAY	-0.0642724	-0.0206431	-0.0328584	0.0186319	0.039144	-0.0177015	0.0444819	0.270415
GENTILE_UV_RESPONSE_CLUSTER_D4	-0.0642393	-0.00642666	0.0251553	0.0345035	0.123142	0.0041606	-0.00975643	0.270266
SA_B_CELL_RECEPTOR_COMPLEXES	-0.0479675	0.0353506	-0.0264938	-0.0074946	0.0140707	-0.028665	0.0450759	0.270258
BLANCO_MELO_COVID19_SARS_COV_2_INFECTION_A594_ACE2_EXPRESSING_CELLS_UP	-0.17391	0.0133579	-0.122717	0.189644	0.0997993	-0.0668806	0.0604461	0.269667
TARTE_PLASMA_CELL_VS_B_LYMPHOCYTE_UP	0.0100384	0.0114533	-0.0989424	0.0443187	0.0601483	0.0199636	0.0322352	0.269488
BENPORATH_OCT4_TARGETS	0.0221375	-0.0181628	-0.000206356	0.0118657	0.0134337	0.0461738	-0.0133495	0.269194
WP_CHROMOSOMAL_AND_MICROSATELLITE_INSTABILITY_IN_COLORECTAL_CANCER	-0.0595966	0.0228241	-0.0464256	0.0489925	0.0623688	-0.0307199	0.0229393	0.269095
HUMMEL_BURKITTS_LYMPHOMA_UP	-0.136211	0.0245894	0.0240624	-0.0680985	0.0443711	-0.0493671	0.0695204	0.268523
CREIGHTON_ENDOCRINE_THERAPY_RESISTANCE_1	0.0305371	0.00589459	-0.0196549	0.0134646	0.00547949	0.0360089	-0.0201897	0.267155
FISCHER_DREAM_TARGETS	0.0143447	0.0343492	0.032772	0.0190698	0.0732197	0.0312087	-0.012648	0.266862
KEGG_CARDIAC_MUSCLE_CONTRACTION	0.0268886	0.00107114	-0.011468	0.00387924	-0.00824826	0.0372061	0.00328391	0.266536
ZHAN_MULTIPLE_MYELOMA_CD1_VS_CD2_UP	-0.0452818	-0.0189498	-0.0141928	0.0996763	0.0723845	0.0130208	-0.0312083	0.266516
REACTOME_MICRORNA_MIRNA_BIOGENESIS	-0.0965581	0.0645852	-0.0977569	0.101091	0.0353775	-0.0556673	0.0666321	0.265963
MARSON_BOUND_BY_E2F4_UNSTIMULATED	0.0536231	0.0462135	0.0500254	0.00342434	-0.00822251	0.0803074	-0.00109915	0.265033
MATZUK_SPERMATOZOA	0.0366222	-0.00289354	-0.0858863	0.0603008	0.0641182	0.0505982	-0.00805187	0.264632
GARGALOVIC_RESPONSE_TO_OXIDIZED_PHOSPHOLIPIDS_TURQUOISE_UP	-0.111543	-0.00365282	-0.0540188	0.10154	0.0315398	-0.0428901	0.0301692	0.264414
WP_STEROL_REGULATORY_ELEMENTBINDING_PROTEINS_SREBP_SIGNALLING	0.185332	0.0493011	-0.0715736	-0.133843	0.011282	0.224766	-0.0650341	0.264245
REACTOME_SEMA4D_IN_SEMAPHORIN_SIGNALING	-0.0285671	0.0219208	-0.0714166	0.0490297	0.0853057	-0.0159587	-0.0160122	0.262853
REACTOME_RECRUITMENT_OF_NUMA_TO_MITOTIC_CENTROSOMES	-0.0569656	0.0154469	0.00476046	0.0666884	0.0143381	-0.0137702	0.0177064	0.262325
KIM_WT1_TARGETS_UP	-0.0764902	0.00502858	-0.0998215	0.148169	0.107407	-0.0102079	0.0603965	0.262208
RODRIGUES_NTN1_AND_DCC_TARGETS	-0.0194491	-0.0241414	-0.176286	0.221593	0.0850065	0.0468995	-0.0216147	0.261879
RIGGI_EWING_SARCOMA_PROGENITOR_DN	0.0297878	0.00520484	-0.137107	-0.0132892	-0.0593463	0.0343635	0.0180716	0.261458
CHEN_HOXA5_TARGETS_9HR_UP	-0.0958557	-0.00997155	-0.073103	0.129408	0.028933	-0.0263089	0.0356411	0.261135
RUTELLA_RESPONSE_TO_HGF_VS_CSF2RB_AND_IL4_DN	-0.0776329	-0.000293602	-0.027299	0.0650773	0.0637734	-0.0268185	0.0227413	0.260996
UEDA_PERIFERAL_CLOCK	-0.025203	0.0135703	-0.0326015	0.0445964	0.0225605	-0.0132333	-0.00328104	0.260139
BECKER_TAMOXIFEN_RESISTANCE_DN	-0.0103294	-0.0520247	-0.0381664	-0.000781675	0.00793514	0.0356793	0.045611	0.259845
CHIARADONNA_NEOPLASTIC_TRANSFORMATION_KRAS_CDC25_UP	0.0681795	-0.0178105	-0.0831787	-0.0276957	0.0394226	0.0875507	0.0103968	0.259777
REACTOME_SIGNALING_BY_RETINOIC_ACID	0.0980548	0.0484336	0.0242024	-0.243084	-0.229524	0.221716	-0.0728565	0.259596
ALTEMEIER_RESPONSE_TO_LPS_WITH_MECHANICAL_VENTILATION	-0.147567	0.0145262	-0.0873655	0.297995	0.189234	-0.00921113	0.0603093	0.259433
WP_HAIR_FOLLICLE_DEVELOPMENT_CYTODIFFERENTIATION_PART_3_OF_3	-0.0295482	-0.0252384	-0.141073	0.0502804	0.0176449	0.0143223	0.0960708	0.2593
WP_HEAD_AND_NECK_SQUAMOUS_CELL_CARCINOMA	-0.0179112	0.00363659	-0.0401444	0.00372988	0.0674932	-0.00356543	0.0164346	0.259045
WP_JOUBERT_SYNDROME	-0.1245	0.0294373	0.0400969	0.0517513	0.0198962	-0.0469103	0.000622926	0.258246
WP_DEVELOPMENT_AND_HETEROGENEITY_OF_THE_ILC_FAMILY	0.098886	-0.34679	-0.0895626	-0.287265	-0.0724837	0.398215	-0.052376	0.258211
PID_NETRIN_PATHWAY	-0.0325668	0.0356164	-0.0519298	-0.0639495	0.0232243	-0.0228059	0.0448832	0.257923
URS_ADIPOCYTE_DIFFERENTIATION_UP	0.0347639	-0.028813	0.0440054	-0.0911873	-0.0722876	0.119424	-0.0984838	0.257551
LIM_MAMMARY_LUMINAL_MATURE_DN	-0.00133442	0.0667299	-0.137141	0.0930573	0.0378956	-0.00750069	0.00371427	0.25754
KAN_RESPONSE_TO_ARSENIC_TRIOXIDE	-0.000867983	-0.0180709	-0.0745256	0.139464	0.114145	0.049587	-0.0188918	0.257371
WP_TARGET_OF_RAPAMYCIN_TOR_SIGNALING	0.0485655	0.0108	0.0133114	0.0111944	-0.00541784	0.0758172	-0.0585284	0.257138
ISHIDA_E2F_TARGETS	0.181353	0.10286	0.201576	0.176573	-0.00486526	0.316696	-0.0400509	0.256645
REACTOME_SUMOYLATION_OF_INTRACELLULAR_RECEPTORS	-0.147301	0.0540245	-0.000550152	0.0402903	0.143243	-0.0638265	0.0614122	0.256419
MITSIADES_RESPONSE_TO_APLIDIN_UP	-0.11055	0.0111443	-0.11407	0.124886	0.049036	-0.0528305	0.0436493	0.255843
PID_E2F_PATHWAY	0.0586269	-0.00668104	-0.0869591	0.067376	-0.0535687	0.0892378	0.00255043	0.255269
REACTOME_INTERLEUKIN_4_AND_INTERLEUKIN_13_SIGNALING	-0.0602982	0.0104156	-0.11293	0.134661	0.150102	-0.00969789	0.0261221	0.254747
LEE_LIVER_CANCER_MYC_DN	0.053301	-0.0601824	-0.133191	0.331472	0.0262663	0.181398	-0.0321839	0.254451
WP_RELATIONSHIP_BETWEEN_INFLAMMATION_COX2_AND_EGFR	0.0323926	0.174679	-0.239894	-0.201147	0.0513435	0.00168955	0.10276	0.253875
ADDYA_ERYTHROID_DIFFERENTIATION_BY_HEMIN	-0.0822705	-0.0161638	-0.0528921	0.116252	0.0641223	-0.0179613	0.0178595	0.253742
PID_AR_TF_PATHWAY	-0.0660107	0.00538265	0.0127078	0.0301837	0.00481746	-0.0256882	-0.000448563	0.251554
ONO_AML1_TARGETS_UP	-0.0410366	0.00447391	-0.0212943	0.117405	0.0442365	0.00994709	0.0327235	0.251496
WP_REGULATION_OF_TOLLLIKE_RECEPTOR_SIGNALING_PATHWAY	-0.133353	0.0269283	-0.0810366	0.160591	0.0324915	-0.0598058	0.028955	0.250953
CHIANG_LIVER_CANCER_SUBCLASS_PROLIFERATION_UP	-0.0113963	0.0456221	-0.000977582	0.0755315	-0.0129731	0.00854872	0.0170747	0.250415
WP_NETRINUNC5B_SIGNALING_PATHWAY	-0.0850311	0.0152141	0.00739953	0.0826178	-0.0452313	-0.0210429	0.0122053	0.250136
WAKABAYASHI_ADIPOGENESIS_PPARG_BOUND_8D	-0.0229617	0.00699259	-0.0114361	0.0246466	0.0247106	-0.0117256	-0.0132433	0.250004
WP_ENDOTHELIN_PATHWAYS	-0.006844	0.0176891	-0.0355278	-0.00494207	0.0765555	0.000589827	0.0126304	0.249751
REACTOME_SRP_DEPENDENT_COTRANSLATIONAL_PROTEIN_TARGETING_TO_MEMBRANE	0.00377326	0.00536279	-0.0125976	0.00420609	-0.0032505	0.00445765	0.00899167	0.249721
REACTOME_NUCLEOTIDE_BINDING_DOMAIN_LEUCINE_RICH_REPEAT_CONTAINING_RECEPTOR_NLR_SIGNALING_PATHWAYS	-0.0824623	0.0212003	-0.0631428	0.0754017	0.0710121	-0.0404745	0.0473476	0.248031
LINDSTEDT_DENDRITIC_CELL_MATURATION_B	-0.126326	0.0104347	-0.117514	0.160244	0.0943256	-0.051875	0.0579902	0.247772
ZHAN_V1_LATE_DIFFERENTIATION_GENES_UP	0.00469489	0.0582464	-0.187518	0.116959	0.0711957	0.00624373	0.0506632	0.247347
REACTOME_INTRINSIC_PATHWAY_FOR_APOPTOSIS	-0.0134789	0.0253141	0.0470713	0.0589285	0.0102055	0.0217388	0.00128199	0.246554
WP_TCELL_RECEPTOR_AND_COSTIMULATORY_SIGNALING	-0.0294963	-0.000515617	-0.0955147	0.0673977	0.104657	0.000738404	0.0486586	0.246213
VERHAAK_GLIOBLASTOMA_NEURAL	0.0216379	-0.0201502	0.00680368	0.022822	0.00722772	0.0505154	0.00380227	0.246015
KEGG_PURINE_METABOLISM	0.0304529	-0.00720857	-0.00895319	0.000702153	-0.000890256	0.048222	0.0210544	0.245763
PUIFFE_INVASION_INHIBITED_BY_ASCITES_DN	-0.0185402	-0.0114487	-0.0744354	0.0450082	0.0614307	-0.000706621	0.00825844	0.245636
REACTOME_DISEASES_OF_GLYCOSYLATION	0.0916821	0.00712341	-0.177163	0.0372888	0.199251	0.100078	-0.122255	0.245605
LAIHO_COLORECTAL_CANCER_SERRATED_UP	0.0300588	0.0137693	-0.107631	0.0202899	0.0231814	0.0243627	0.0130218	0.244962
REACTOME_RNA_POLYMERASE_III_TRANSCRIPTION_INITIATION_FROM_TYPE_3_PROMOTER	-0.052169	0.0595934	-0.0691823	0.00375393	0.0894372	-0.0340867	0.0809879	0.244072
BIOCARTA_INFLAM_PATHWAY	-0.0599652	0.032399	-0.443752	0.187797	0.645117	0.0510814	0.21667	0.243373
REACTOME_ESR_MEDIATED_SIGNALING	-0.0463291	0.02019	-0.0300576	0.0287824	0.0546794	-0.0257699	0.0265452	0.242839
BERENJENO_ROCK_SIGNALING_NOT_VIA_RHOA_DN	-0.0610408	0.0368956	-0.0805613	0.09544	0.0458897	-0.0398804	0.00355741	0.242802
WP_GASTRIC_CANCER_NETWORK_1	0.15336	0.286136	0.0722567	0.128597	-0.623388	0.369106	-0.0631662	0.242491
LEE_AGING_NEOCORTEX_DN	0.0286814	0.00735876	-0.10075	0.0970451	0.0168504	0.0441257	0.0222817	0.242457
MCGARVEY_SILENCED_BY_METHYLATION_IN_COLON_CANCER	0.352063	-0.100777	-0.435559	0.117066	0.161681	0.441762	-0.567787	0.242433
REACTOME_ACTIVATION_OF_NMDA_RECEPTORS_AND_POSTSYNAPTIC_EVENTS	-0.0217177	0.0484655	-0.106842	0.101637	0.0982565	-0.00207406	0.0794281	0.2423
REACTOME_MATURATION_OF_SARS_COV_2_SPIKE_PROTEIN	-0.0089785	0.0346718	-0.0917133	0.00559704	0.0960915	-0.0100274	0.026442	0.241556
HUANG_FOXA2_TARGETS_DN	0.0565001	0.0756152	-0.346601	0.247438	0.111741	0.0637155	0.067226	0.240997
KEGG_T_CELL_RECEPTOR_SIGNALING_PATHWAY	-0.0573435	0.0198954	-0.0513727	-0.0035246	0.0393692	-0.0328458	0.0637161	0.24079
BUYTAERT_PHOTODYNAMIC_THERAPY_STRESS_UP	-0.0935607	0.00427139	-0.0743616	0.105525	0.0238067	-0.0469584	0.012025	0.240355
REACTOME_NGF_STIMULATED_TRANSCRIPTION	-0.18436	0.0151544	-0.0786919	0.102147	0.0760705	-0.0949629	0.0715307	0.240333
EPPERT_PROGENITOR	0.0113225	0.0329175	0.0273482	-0.0492342	0.0421241	0.0288848	-0.0583813	0.240258
REACTOME_ASSEMBLY_AND_CELL_SURFACE_PRESENTATION_OF_NMDA_RECEPTORS	-0.0889913	0.0646774	-0.125884	0.161741	0.145295	-0.0218935	0.172826	0.239999
ZWANG_EGF_PERSISTENTLY_UP	0.329229	0.0128107	-0.036947	-0.394724	0.0571459	0.466152	-0.366588	0.238858
BROWNE_HCMV_INFECTION_18HR_DN	-0.0249505	0.00317617	0.00366755	0.0698823	0.00456166	0.00646794	-0.0199648	0.238713
REACTOME_DDX58_IFIH1_MEDIATED_INDUCTION_OF_INTERFERON_ALPHA_BETA	-0.076227	0.0146293	-0.0273364	0.0950853	0.0362584	-0.0313356	0.0085385	0.238326
WP_ANDROGEN_RECEPTOR_SIGNALING_PATHWAY	-0.0538829	0.00073848	0.00526039	0.013516	0.0639887	-0.0185135	0.00211339	0.238222
LI_INDUCED_T_TO_NATURAL_KILLER_UP	0.0165648	-0.0138722	-0.0802074	0.00455175	0.0605793	0.0277042	0.0287743	0.237794
CREIGHTON_ENDOCRINE_THERAPY_RESISTANCE_4	0.0598884	-0.00485834	-0.0467484	0.0806126	0.0162749	0.0830826	-0.0469265	0.237466
WP_EPO_RECEPTOR_SIGNALING	-0.154623	-0.0252454	-0.0139779	0.0999849	0.0288033	-0.0357692	0.111233	0.236617
PID_ANGIOPOIETIN_RECEPTOR_PATHWAY	-0.0228292	0.038339	-0.115047	0.0423568	0.109884	-0.0248422	-0.00766111	0.236528
HEIDENBLAD_AMPLIFIED_IN_PANCREATIC_CANCER	-0.0326682	0.0129873	0.127878	-0.183525	-0.0768276	0.0847385	-0.0930997	0.236348
WP_G13_SIGNALING_PATHWAY	0.00557469	0.0236227	-0.0170566	-0.0264681	0.0129632	-0.000620401	-0.0154115	0.235992
PASQUALUCCI_LYMPHOMA_BY_GC_STAGE_DN	-0.0418024	0.0185707	0.00182	-0.000238314	0.0595422	-0.0191185	0.0130609	0.235292
XU_HGF_SIGNALING_NOT_VIA_AKT1_48HR_UP	0.0557106	-0.0801192	-0.164082	-0.023879	0.0899629	0.106164	0.0748285	0.235215
ROSTY_CERVICAL_CANCER_PROLIFERATION_CLUSTER	0.210247	0.146872	0.058871	0.101033	0.0299221	0.226958	0.0162772	0.234261
MEISSNER_BRAIN_ICP_WITH_H3K4ME3	0.000165203	-0.000376596	0.00200688	-0.00118417	-0.000502597	0.00200607	-0.000501983	0.234025
LOCKWOOD_AMPLIFIED_IN_LUNG_CANCER	0.0450824	0.00606599	-0.051897	0.0287452	-0.00704855	0.0502827	0.00851579	0.233864
BIOCARTA_NFAT_PATHWAY	-0.0277599	0.0330032	-0.0421029	-0.00672418	0.0445834	-0.0275211	0.0148687	0.233376
NAKAMURA_CANCER_MICROENVIRONMENT_DN	0.105747	-0.0169486	0.0376623	-0.0856181	-0.086661	0.192845	-0.0918385	0.231602
PID_THROMBIN_PAR1_PATHWAY	0.00626578	0.0167384	-0.00532585	-0.0860459	0.00463559	0.0164998	-0.0321171	0.230312
WP_ENDOPLASMIC_RETICULUM_STRESS_RESPONSE_IN_CORONAVIRUS_INFECTION	-0.0635953	0.00513044	-0.000885219	0.0220761	0.0113778	-0.0279275	0.0277159	0.23006
REACTOME_RHO_GTPASES_ACTIVATE_IQGAPS	-0.0319536	0.0109826	-0.0511099	0.0266017	0.0532002	-0.0189885	0.0293821	0.229511
GINESTIER_BREAST_CANCER_ZNF217_AMPLIFIED_DN	-0.0396103	0.00481472	0.0578027	-0.0395628	-0.0292613	0.0135029	0.005105	0.229297
KAUFFMANN_MELANOMA_RELAPSE_UP	0.123808	0.128079	0.0636207	0.245444	-0.00853147	0.175757	-0.0112621	0.229284
KEGG_VEGF_SIGNALING_PATHWAY	-0.044731	0.0445087	-0.0529391	-0.165565	0.00897044	-0.0269561	0.0366915	0.228926
REACTOME_FCERI_MEDIATED_CA_2_MOBILIZATION	0.0133005	0.0158514	-0.0954554	-0.144797	0.02364	0.0195024	0.0374412	0.226543
MONNIER_POSTRADIATION_TUMOR_ESCAPE_UP	-0.0472002	0.0188066	0.0452159	-0.048245	-0.00678681	-0.00603254	0.0113289	0.226523
SASAI_RESISTANCE_TO_NEOPLASTIC_TRANSFROMATION	-0.122137	0.00532571	-0.0791861	0.072236	0.221572	-0.050955	0.0410113	0.226478
RIZ_ERYTHROID_DIFFERENTIATION_CCNE1	-0.0666493	-0.0233554	0.0304523	0.0549476	0.0610266	-0.00217671	-0.00968264	0.226423
ROSS_AML_WITH_CBFB_MYH11_FUSION	0.00149957	0.101653	-0.216204	0.0289285	0.0893832	-0.0267658	0.0792277	0.225968
REACTOME_INTRAFLAGELLAR_TRANSPORT	-0.0649994	0.0463905	-0.0262288	0.0263556	0.0116149	-0.0322714	0.0865557	0.224974
REACTOME_GLUCAGON_SIGNALING_IN_METABOLIC_REGULATION	-0.041207	0.0407018	-0.0228557	0.0285404	0.144597	-0.0171264	0.0119876	0.224904
SMITH_TERT_TARGETS_UP	-0.0495086	-0.00406562	-0.0226439	0.0255391	-0.0105358	-0.0165883	0.0475742	0.224049
REACTOME_SIGNALING_BY_FGFR1	-0.0512715	0.0125666	0.0305045	0.00575671	0.0176859	-0.0149294	0.0190546	0.223431
GAZDA_DIAMOND_BLACKFAN_ANEMIA_PROGENITOR_DN	0.0526581	0.0341984	-0.0212787	-0.0134529	-0.0197524	0.0502443	-0.0122895	0.222581
JIANG_TIP30_TARGETS_UP	-0.0204444	-0.006719	-0.0498891	-0.012408	0.0827609	-0.00311822	0.028642	0.222405
HESS_TARGETS_OF_HOXA9_AND_MEIS1_DN	-0.0939399	-0.0238976	-0.11879	0.128137	0.0587329	-0.0377751	0.0444526	0.221915
TARTE_PLASMA_CELL_VS_PLASMABLAST_UP	-0.0416938	0.01156	-0.0534132	0.0530706	0.0375849	-0.0248092	0.0244829	0.221
NAKAMURA_TUMOR_ZONE_PERIPHERAL_VS_CENTRAL_DN	-0.0149212	0.0103683	-0.0569616	0.0683952	0.0734157	-0.00365325	-0.017061	0.22083
SERVITJA_ISLET_HNF1A_TARGETS_UP	0.0162121	0.0381515	-0.115145	0.0508372	0.0617408	0.00424741	0.0227267	0.220066
RICKMAN_HEAD_AND_NECK_CANCER_C	-0.0478081	-0.142168	-0.0590809	-0.0570092	0.319439	0.101839	0.0909545	0.219904
OUYANG_PROSTATE_CANCER_PROGRESSION_UP	-0.0662376	0.0268454	-0.0406534	0.0567107	0.113184	-0.0365221	0.0165053	0.219133
REACTOME_METABOLISM_OF_WATER_SOLUBLE_VITAMINS_AND_COFACTORS	0.00890766	-0.0270926	-0.12723	-0.141975	0.137273	0.0272071	0.00695635	0.218792
WP_HOSTPATHOGEN_INTERACTION_OF_HUMAN_CORONA_VIRUSES_MAPK_SIGNALING	-0.0397722	-0.00996605	-0.00626077	0.00547648	-0.00562959	-0.00734539	0.0452558	0.217675
REACTOME_FGFR2_ALTERNATIVE_SPLICING	-0.0668671	0.0484977	0.018468	0.1092	0.0340065	-0.0200992	0.0247695	0.217495
KEGG_ARACHIDONIC_ACID_METABOLISM	-0.019756	0.0345837	-0.0315408	0.0181171	0.179762	0.0149266	0.0903847	0.217246
AMIT_SERUM_RESPONSE_120_MCF10A	-0.183316	0.00548621	-0.13275	0.144774	0.163238	-0.0960538	0.0871101	0.216635
WP_NOVEL_INTRACELLULAR_COMPONENTS_OF_RIGILIKE_RECEPTOR_RLR_PATHWAY	-0.121397	-0.0146231	-0.00970515	0.272914	-0.0451188	0.00972215	-0.0154468	0.21558
LEE_EARLY_T_LYMPHOCYTE_DN	-0.0165739	0.00092499	-0.109469	0.0456689	0.0907261	-0.00969753	0.0150091	0.215577
REACTOME_OVARIAN_TUMOR_DOMAIN_PROTEASES	-0.110652	0.010883	-0.00688919	0.0481802	0.052581	-0.0457116	0.0732917	0.215331
PID_ATF2_PATHWAY	-0.0543742	-0.000945323	-0.045236	-0.000662576	0.0406359	-0.0275171	0.0586822	0.214737
REACTOME_GOLGI_TO_ER_RETROGRADE_TRANSPORT	-0.0062479	0.00585159	-0.012192	-0.0666416	0.0108839	0.00511298	0.0141453	0.213769
BHAT_ESR1_TARGETS_NOT_VIA_AKT1_DN	-0.0671956	0.0278084	-0.143831	-0.192556	-0.0898347	-0.0632413	0.0445586	0.212673
HALMOS_CEBPA_TARGETS_UP	-0.0920331	0.0316734	-0.23871	0.128785	0.255736	-0.0597473	0.0745275	0.212571
WHITFIELD_CELL_CYCLE_G1_S	0.0375759	-0.00517703	0.0331244	-0.0228183	0.0242468	0.0675735	-0.0304988	0.210955
YAO_HOXA10_TARGETS_VIA_PROGESTERONE_UP	-0.111378	-0.0223429	-0.0778702	0.0518889	0.186154	-0.0481927	0.0306746	0.21024
LIU_VMYB_TARGETS_UP	0.0495793	0.0172784	-0.0692482	0.0469749	-0.0288222	0.0469768	-0.040408	0.210223
REACTOME_REGULATION_OF_PLK1_ACTIVITY_AT_G2_M_TRANSITION	-0.0617465	-0.0144403	0.0348951	0.0194977	-0.00559501	-0.0131554	-0.0182389	0.209296
WP_PHOTODYNAMIC_THERAPYINDUCED_NFKB_SURVIVAL_SIGNALING	-0.135138	0.0656379	-0.225974	0.375689	0.262964	-0.0493113	0.101008	0.208718
WP_TRANSLATION_INHIBITORS_IN_CHRONICALLY_ACTIVATED_PDGFRA_CELLS	-0.0286896	0.00127566	-0.0409442	-0.0543897	0.032041	-0.0202275	0.0229881	0.208495
REACTOME_MRNA_CAPPING	-0.0667958	0.0560206	-0.0117702	0.0910634	0.0115201	-0.0233455	0.0924573	0.208424
DACOSTA_UV_RESPONSE_VIA_ERCC3_XPCS_UP	-0.117341	0.011407	0.029897	0.202905	0.0129839	-0.0132398	-0.00368471	0.208212
GENTILE_UV_HIGH_DOSE_DN	-0.0261476	0.0225628	-0.0294625	0.050602	0.0569612	-0.0171278	-0.00272136	0.207254
PUIFFE_INVASION_INHIBITED_BY_ASCITES_UP	0.0370143	0.00784956	-0.0164795	0.0216371	0.0526549	0.0416463	-0.0468654	0.207133
GYORFFY_DOXORUBICIN_RESISTANCE	-0.0198839	-0.0021869	-0.1078	0.130834	0.022937	0.00301675	0.00843215	0.207105
WP_OVARIAN_INFERTILITY_GENES	-0.0952384	-0.0258627	0.00816106	0.0493614	0.0387781	-0.0194894	0.0685673	0.206753
WP_ETHANOL_EFFECTS_ON_HISTONE_MODIFICATIONS	-0.0299585	0.0649513	-0.0615263	-0.0778786	0.125125	-0.0127948	0.116631	0.205821
NIKOLSKY_BREAST_CANCER_6P24_P22_AMPLICON	-0.156577	0.0493152	0.177058	0.353049	-0.0618366	0.058919	-0.00292817	0.204873
REACTOME_TRANSPORT_OF_INORGANIC_CATIONS_ANIONS_AND_AMINO_ACIDS_OLIGOPEPTIDES	-0.0140465	0.0211058	-0.0923853	0.0628247	0.0604686	-0.0106017	0.0397629	0.204018
REACTOME_HOMOLOGOUS_DNA_PAIRING_AND_STRAND_EXCHANGE	0.240084	0.350295	0.533411	0.250506	-0.523184	0.588895	-0.126436	0.201973
RODWELL_AGING_KIDNEY_NO_BLOOD_DN	0.00109217	0.00466269	-0.00745185	0.00151474	0.0189126	0.00249396	0.0104629	0.20192
ZHAN_MULTIPLE_MYELOMA_HP_DN	0.0645025	0.024166	-0.163837	0.110727	0.0217622	0.0593645	0.0401361	0.20162
OUILLETTE_CLL_13Q14_DELETION_DN	-0.0946542	-0.10255	0.191648	-0.629893	-0.233378	0.201986	-0.00955282	0.201065
HAHTOLA_MYCOSIS_FUNGOIDES_CD4_DN	0.0110256	0.0210991	0.0150021	0.0248299	0.0331772	0.0184786	-0.0385303	0.200483
BILD_SRC_ONCOGENIC_SIGNATURE	-0.00990885	-0.103803	-0.108801	-0.228607	0.0174015	0.0688026	0.0974274	0.200368
IVANOVA_HEMATOPOIESIS_STEM_CELL	-0.0967528	0.0283012	-0.0544178	0.0458033	0.0592815	-0.0670538	0.040547	0.200317
PID_ERBB1_DOWNSTREAM_PATHWAY	-0.0520115	0.0167127	0.0241769	0.0073188	-0.0220288	-0.0174195	0.0266582	0.20014
AMIT_EGF_RESPONSE_240_HELA	0.00302591	-0.0280307	-0.0298788	0.0697858	0.0398177	0.0303656	-0.00723138	0.198353
PANGAS_TUMOR_SUPPRESSION_BY_SMAD1_AND_SMAD5_DN	0.0169665	-0.00834311	0.0171608	0.00352377	-0.0465949	0.0474834	-0.0707069	0.198224
CHIANG_LIVER_CANCER_SUBCLASS_PROLIFERATION_DN	0.0267714	0.0408631	-0.0671443	0.0194134	-0.0901122	0.0241892	-0.00255	0.198029
REACTOME_RHO_GTPASE_CYCLE	-0.0160483	0.0205724	0.00148363	-0.0208753	0.0272206	-0.0135104	-0.0178132	0.197933
BRACHAT_RESPONSE_TO_CAMPTOTHECIN_UP	-0.129264	-0.0616228	0.0774147	-0.113775	-0.102995	0.0041737	0.0528618	0.197742
PLASARI_TGFB1_TARGETS_1HR_UP	-0.0928371	0.0337358	-0.22216	0.217428	0.224752	-0.0437134	0.133006	0.197711
REACTOME_BILE_ACID_AND_BILE_SALT_METABOLISM	0.0171392	-0.224044	-0.180309	-1.12747	-0.371357	0.244827	-0.277243	0.197402
RASHI_RESPONSE_TO_IONIZING_RADIATION_6	-0.00262489	0.011966	-0.107727	0.135712	0.122488	0.00926486	-0.0398037	0.197027
WP_FOLATE_METABOLISM	-0.067013	0.0114817	-0.0243842	0.220063	0.113936	0.00296621	-0.0134583	0.196833
WANG_IMMORTALIZED_BY_HOXA9_AND_MEIS1_DN	-0.0909907	0.00204719	-0.309542	0.175393	0.19077	-0.0379612	0.214186	0.196682
BIOCARTA_INTEGRIN_PATHWAY	-0.0578745	0.00454136	-0.0281788	-0.0407645	0.0532544	-0.0370166	0.0310457	0.196396
VERRECCHIA_EARLY_RESPONSE_TO_TGFB1	-0.0224336	0.0192916	-0.0950943	0.0451285	0.0808957	-0.0180122	0.0495968	0.196345
CROONQUIST_NRAS_VS_STROMAL_STIMULATION_DN	-0.0475149	0.0523182	-0.0795254	0.107412	0.0882002	-0.0370866	0.0303083	0.195465
GRABARCZYK_BCL11B_TARGETS_UP	0.0581699	-0.00731243	-0.166132	0.0244337	0.0424969	0.0442681	0.00500889	0.195336
BROWNE_HCMV_INFECTION_24HR_DN	0.019698	0.0131971	-0.103963	0.0315088	0.0354057	0.00881343	0.020547	0.195212
REACTOME_ACTIVATION_OF_THE_PRE_REPLICATIVE_COMPLEX	-0.0254372	0.361979	0.173263	0.0600822	-0.664088	0.155904	-0.107975	0.195024
WP_HYPOTHESIZED_PATHWAYS_IN_PATHOGENESIS_OF_CARDIOVASCULAR_DISEASE	-0.0558812	0.0547869	-0.146325	-0.361811	-0.134137	-0.0637145	-0.0637651	0.194301
TONKS_TARGETS_OF_RUNX1_RUNX1T1_FUSION_HSC_DN	0.0247463	0.0209269	-0.0983146	0.0225199	0.0589804	0.0134349	0.0366963	0.192945
BURTON_ADIPOGENESIS_12	-0.0355702	0.0440982	-0.00629692	0.0364882	0.0139497	-0.0290681	-0.0936429	0.192879
REACTOME_NOTCH1_INTRACELLULAR_DOMAIN_REGULATES_TRANSCRIPTION	-0.068493	-0.0266515	-0.0120664	0.0167929	0.0481998	-0.0245291	0.0320561	0.192701
WP_IL18_SIGNALING_PATHWAY	-0.0589559	0.0218005	-0.042639	0.0896487	0.0967957	-0.0275439	0.0461483	0.192316
CASORELLI_ACUTE_PROMYELOCYTIC_LEUKEMIA_UP	-0.0533801	-0.0100993	-0.0667392	0.0673755	0.0696888	-0.0227721	0.0481032	0.192229
YIH_RESPONSE_TO_ARSENITE_C1	-0.0864255	0.0433379	-0.00123042	0.106483	0.0586361	-0.0372177	0.0606912	0.192168
RICKMAN_TUMOR_DIFFERENTIATED_WELL_VS_POORLY_UP	-0.00139757	-0.0029559	0.0216552	-0.00513711	0.0177656	0.0141402	-0.0144599	0.191421
REACTOME_MEIOSIS	-0.0768646	0.0358759	0.0444054	0.0552011	0.0202857	-0.0275604	0.025091	0.191418
PHONG_TNF_RESPONSE_VIA_P38_COMPLETE	-0.0393737	0.0108741	-0.0683998	0.0514336	0.0515812	-0.024884	0.0489212	0.191271
REACTOME_NOD1_2_SIGNALING_PATHWAY	-0.142527	0.0308361	-0.0121242	-0.000114884	0.0407291	-0.0762362	0.107416	0.190327
OISHI_CHOLANGIOMA_STEM_CELL_LIKE_DN	-0.0383684	0.008742	-0.149388	0.0974849	0.110092	-0.0283825	0.0412744	0.19017
ALCALA_APOPTOSIS	-0.0133388	0.00651996	0.000768481	0.0384356	0.0162755	-0.00135097	-0.00206644	0.189656
KEGG_PATHOGENIC_ESCHERICHIA_COLI_INFECTION	-0.0242848	0.0060894	-0.0134037	-0.00922634	0.00598778	-0.0185211	0.0139304	0.189581
WP_PATHOGENIC_ESCHERICHIA_COLI_INFECTION	-0.0242848	0.0060894	-0.0134037	-0.00922634	0.00598778	-0.0185211	0.0139304	0.189581
KAAB_FAILED_HEART_VENTRICLE_DN	-0.0274431	0.0311569	-0.0386418	0.0837582	0.141115	-0.00451765	0.0493653	0.189447
ZHAN_V2_LATE_DIFFERENTIATION_GENES	-0.036523	0.00371016	-0.0364773	0.067423	0.0343818	-0.0193016	-0.000702134	0.189209
ZHAN_MULTIPLE_MYELOMA_CD1_AND_CD2_DN	-0.0237048	0.017651	-0.0583897	-0.0143464	0.115549	-0.0163554	0.0353789	0.187393
KYNG_WERNER_SYNDROM_AND_NORMAL_AGING_UP	0.0137755	-0.0220074	-0.0460265	-0.00852636	0.0119232	0.0141762	-0.0388128	0.187362
WP_GLYCOSYLATION_AND_RELATED_CONGENITAL_DEFECTS	0.098841	-0.0270053	-0.242262	0.342089	0.0376934	0.141027	-0.0699161	0.187273
BROWNE_HCMV_INFECTION_48HR_UP	0.0398618	-0.0654987	-0.0309898	0.0190869	-0.00706756	0.0845776	0.00552944	0.186916
REACTOME_SIGNALING_BY_FGFR4	-0.0454551	0.009569	0.0309714	-0.0163495	0.0248668	-0.0144858	0.016996	0.186889
ZHAN_MULTIPLE_MYELOMA_MS_UP	-0.0642517	0.0224887	-0.210501	0.160494	0.176843	-0.0570948	-0.010841	0.186575
PID_IL12_STAT4_PATHWAY	-0.146578	-0.000104868	-0.0816418	0.101483	0.128146	-0.0808113	0.0775295	0.186373
REACTOME_FLT3_SIGNALING_IN_DISEASE	-0.0321106	0.0198074	-0.0302514	0.0396865	0.0407472	-0.0271823	-0.0102386	0.18599
WP_DIFFERENTIATION_PATHWAY	-0.106087	0.0175492	-0.307786	-0.193107	0.374652	-0.0926587	0.110463	0.185851
OLSSON_E2F3_TARGETS_DN	0.0205488	0.0440468	-0.0476772	0.0903936	-0.00964183	0.0171569	-0.00858795	0.184701
WEST_ADRENOCORTICAL_TUMOR_UP	0.0492532	-0.00307796	0.0320003	-0.0284534	-0.049223	0.0871902	-0.0187349	0.184513
KRIEG_HYPOXIA_NOT_VIA_KDM3A	-0.0250117	0.00486272	-0.0500632	0.0304054	0.0714668	-0.0198351	-0.00601571	0.184269
OZEN_MIR125B1_TARGETS	0.0266064	-0.256942	0.147309	-0.447725	-0.148837	0.291373	-0.392886	0.183634
ICHIBA_GRAFT_VERSUS_HOST_DISEASE_35D_DN	-0.196466	0.0884258	-0.0676996	0.0736397	-0.0448886	-0.153219	0.0201379	0.183421
WANG_HCP_PROSTATE_CANCER	-0.103408	0.00385887	-0.061811	0.0610502	0.0544835	-0.0660912	0.0447972	0.18251
HAHTOLA_MYCOSIS_FUNGOIDES_CD4_UP	-0.14046	-0.0214978	-0.0590773	0.173136	0.0535835	-0.0545191	0.0602288	0.182353
GAVIN_FOXP3_TARGETS_CLUSTER_T4	0.0140606	-0.00418473	-0.0481826	-0.0323439	0.0122976	0.0120381	0.0185422	0.181887
LIU_CMYB_TARGETS_UP	0.0249344	-0.024197	-0.0847134	0.108048	0.0737604	0.044883	0.0074493	0.181879
REACTOME_SIGNALING_BY_EGFR	-0.0198761	-0.0248208	-0.0536828	-0.0394004	0.0635841	0.000999672	0.0517447	0.181637
BIOCARTA_MAPK_PATHWAY	-0.0996446	0.0226301	-0.0776033	0.0509236	0.0908855	-0.0733536	0.0479306	0.181054
JOSEPH_RESPONSE_TO_SODIUM_BUTYRATE_DN	0.0240994	0.0334522	-0.0733842	0.0219841	0.0614477	0.00712729	0.0196347	0.180719
WP_ENERGY_METABOLISM	-0.133025	0.0261236	-0.0206894	0.0397403	0.0311326	-0.0926414	-0.0036259	0.180434
ONO_FOXP3_TARGETS_UP	-0.0386814	0.00711327	-0.0175891	0.117243	0.0466561	-0.00137736	0.0306863	0.180379
DIRMEIER_LMP1_RESPONSE_EARLY	-0.101206	0.0052919	-0.0244486	0.106859	-0.00391376	-0.0430374	0.0534049	0.180349
JAERVINEN_AMPLIFIED_IN_LARYNGEAL_CANCER	0.0674365	0.00381731	-0.0257921	-0.0906337	-0.0960942	0.094749	0.00511195	0.180322
CROONQUIST_STROMAL_STIMULATION_UP	-0.108215	0.0207008	-0.0828067	0.193775	0.0537465	-0.0562838	0.0230001	0.180289
MCDOWELL_ACUTE_LUNG_INJURY_DN	-0.0902458	-0.030202	0.15577	-0.0887918	-0.0724793	0.0396295	-0.0630152	0.18013
ZHAN_EARLY_DIFFERENTIATION_GENES_DN	-0.253287	0.129427	-0.0724509	0.142143	0.057112	-0.192641	0.0358014	0.180042
RYAN_MANTLE_CELL_LYMPHOMA_NOTCH_DIRECT_UP	-0.137773	0.0575086	-0.0911631	0.108833	0.00486872	-0.0884044	0.126801	0.180036
WP_MYOMETRIAL_RELAXATION_AND_CONTRACTION_PATHWAYS	-0.0473024	0.0127294	-0.0438348	0.0530573	0.082868	-0.0295132	0.0250917	0.179976
WAKABAYASHI_ADIPOGENESIS_PPARG_RXRA_BOUND_8D	0.00626375	0.0161388	-0.0355965	0.0106074	0.00155312	-0.00314071	-0.000151067	0.179807
WP_CYTOKINES_AND_INFLAMMATORY_RESPONSE	-0.0472124	0.0170823	-0.419838	0.159243	0.606067	-0.00382983	0.238983	0.179527
GOBERT_CORE_OLIGODENDROCYTE_DIFFERENTIATION	-0.0247096	-0.445255	-0.0902635	0.282609	0.229337	0.273434	-0.371806	0.178343
GARGALOVIC_RESPONSE_TO_OXIDIZED_PHOSPHOLIPIDS_TURQUOISE_DN	-0.194613	-0.0343185	0.166413	0.0645314	-0.218382	-0.00179393	-0.0961033	0.178116
HADDAD_B_LYMPHOCYTE_PROGENITOR	-0.0498083	-0.0111905	0.00559211	-0.00515376	0.0618976	-0.0192934	0.00674328	0.176862
TSENG_IRS1_TARGETS_UP	0.00498714	0.0413283	-0.0882916	-0.0300032	0.0343731	-0.0195447	0.0184035	0.176153
REACTOME_RAS_PROCESSING	0.0199654	-0.0116538	-0.0303165	0.00998118	0.0257347	0.0236932	0.00677694	0.176067
WP_HEMATOPOIETIC_STEM_CELL_DIFFERENTIATION	-0.0777137	-0.0255058	-0.139244	0.221636	0.208961	-0.0110042	0.0805468	0.175834
REACTOME_RAB_GERANYLGERANYLATION	-0.0707585	0.0015728	-0.019046	-0.0952006	0.0115321	-0.0507504	0.0069167	0.175661
PID_MTOR_4PATHWAY	-0.0203142	0.0125055	-0.0114486	-0.0265771	0.0253413	-0.0143373	0.023396	0.175143
VERHAAK_AML_WITH_NPM1_MUTATED_UP	-0.0797623	0.0243771	-0.0967529	0.144343	0.0827013	-0.0458937	0.071669	0.175072
REACTOME_CONSTITUTIVE_SIGNALING_BY_ABERRANT_PI3K_IN_CANCER	-0.00289593	-0.040219	-0.153409	-0.0848067	0.180864	0.0206936	0.0999232	0.174683
WP_HISTONE_MODIFICATIONS	-0.27351	0.0382572	-0.0175066	-0.0560521	0.273928	-0.186954	-0.0852318	0.174055
ZHOU_INFLAMMATORY_RESPONSE_FIMA_UP	-0.0392153	-0.00900297	-0.0498907	0.140145	0.0659043	0.000137614	0.0260872	0.173633
WP_SIGNALING_PATHWAYS_IN_GLIOBLASTOMA	-0.0152492	-0.0346771	0.00149844	-0.106596	0.00469278	0.0258982	0.0299043	0.173419
GAVIN_PDE3B_TARGETS	0.218835	-0.0382228	-0.953254	-0.544145	0.145404	0.063802	0.00777692	0.173179
WP_MIRNAS_INVOLVEMENT_IN_THE_IMMUNE_RESPONSE_IN_SEPSIS	-0.28803	0.00579446	-0.177069	0.311595	0.195465	-0.172882	0.0599713	0.172579
REACTOME_HIV_ELONGATION_ARREST_AND_RECOVERY	-0.017805	0.0711127	-0.0526696	0.0628666	0.0664019	-0.0273407	0.0406943	0.171022
WP_ATM_SIGNALING_PATHWAY	-0.0254849	-0.00397828	-0.0369534	0.094481	-0.0267643	0.000141828	-0.000424133	0.170757
REACTOME_FORMATION_OF_RNA_POL_II_ELONGATION_COMPLEX	-0.0425762	0.0594303	-0.017086	0.0747041	0.0622454	-0.0332626	0.0264468	0.17069
TAKAO_RESPONSE_TO_UVB_RADIATION_DN	-0.0336282	-0.0247094	0.00737103	0.0699479	0.0213157	0.00775308	0.00423803	0.17049
ELVIDGE_HIF1A_AND_HIF2A_TARGETS_UP	-0.0139382	-0.0259734	0.148715	-0.257797	-0.106769	0.126394	-0.00245202	0.170396
REACTOME_FACTORS_INVOLVED_IN_MEGAKARYOCYTE_DEVELOPMENT_AND_PLATELET_PRODUCTION	-0.0630223	0.0255001	-0.0436609	0.0244005	0.0276036	-0.0431132	0.0720344	0.169602
AMUNDSON_RESPONSE_TO_ARSENITE	-0.04187	0.0116109	-0.0183401	0.0325418	0.0526236	-0.0293218	-0.00200457	0.16944
VANDESLUIS_COMMD1_TARGETS_GROUP_3_DN	-0.527133	0.1903	-0.568283	0.683834	0.355441	-0.431076	0.0615824	0.169402
HUTTMANN_B_CLL_POOR_SURVIVAL_UP	0.0115343	-0.0124626	-0.0244428	0.00286066	0.00821997	0.013728	-0.00166896	0.169192
KEGG_MAPK_SIGNALING_PATHWAY	-0.0587171	0.0272917	-0.0802784	0.0454225	0.0408511	-0.0504601	0.0572832	0.168939
ELVIDGE_HYPOXIA_DN	-0.039725	0.0234905	0.0641045	0.0244004	0.0379727	-0.00200634	-0.0220251	0.168854
SEKI_INFLAMMATORY_RESPONSE_LPS_UP	-0.193471	0.0561318	-0.132831	0.323825	0.215552	-0.107514	0.0898985	0.168796
CHICAS_RB1_TARGETS_GROWING	0.0665504	-0.00224707	0.0369637	0.0865823	-0.0127121	0.108873	-0.0157535	0.168142
REACTOME_OPIOID_SIGNALLING	-0.0579559	0.0334872	-0.00948021	0.0144244	0.0968037	-0.0419232	0.00509008	0.167983
VART_KSHV_INFECTION_ANGIOGENIC_MARKERS_UP	0.0418374	0.025726	-0.181351	0.0932987	0.156813	0.0197291	0.0232635	0.167836
YAO_TEMPORAL_RESPONSE_TO_PROGESTERONE_CLUSTER_16	0.103938	-0.00559757	-0.0930048	0.015064	-0.0721117	0.119127	0.0510314	0.167312
PID_REG_GR_PATHWAY	-0.130949	-0.00139759	-0.0426408	0.122071	0.0790798	-0.0627356	0.0811714	0.166467
PID_CXCR3_PATHWAY	-0.00585808	0.0329742	-0.0205532	-0.0739949	-0.0350392	-0.00206474	0.0356708	0.166378
GROSS_ELK3_TARGETS_DN	0.0655112	-0.0762632	-0.183854	0.310404	0.226994	0.124536	-0.0430414	0.165994
MIKKELSEN_IPS_WITH_HCP_H3K27ME3	-0.0832827	-0.0364713	0.0844863	0.0446582	-0.0434533	0.00867365	-0.0366507	0.165976
HOWLIN_CITED1_TARGETS_1_DN	0.0849189	-0.0890917	-0.0932469	-0.0411382	-0.0758098	0.130256	0.00532373	0.165966
BENPORATH_ES_1	0.00587959	0.00908751	0.0655364	-0.0131035	0.0329063	0.0389139	-0.0268802	0.165831
DAZARD_RESPONSE_TO_UV_NHEK_DN	-0.0720945	0.0281423	-0.0487421	-0.0314141	0.0648794	-0.077336	-0.101626	0.165561
DELPUECH_FOXO3_TARGETS_UP	-0.0536873	-0.0277084	-0.0747548	0.0153837	0.0304795	-0.02738	0.0673599	0.165537
MACAEVA_PBMC_RESPONSE_TO_IR	0.0206083	0.00718359	0.02786	-0.0172406	-0.0159112	0.0368594	-0.0305431	0.165035
LUI_THYROID_CANCER_CLUSTER_2	0.0119136	0.00700828	-0.151098	-0.0300101	0.016716	-0.0198174	-0.00666589	0.16391
KEGG_PANCREATIC_CANCER	-0.0534866	0.0421503	-0.0152367	0.0374917	0.079618	-0.0419669	0.0159941	0.163684
YOSHIMURA_MAPK8_TARGETS_DN	0.01454	0.00228196	-0.0272328	-0.0118616	0.0301169	0.00891386	-0.00702208	0.163605
WP_CILIOPATHIES	-0.241325	0.074649	0.0578835	0.0999695	-0.185568	-0.114891	0.0490551	0.163509
LEIN_OLIGODENDROCYTE_MARKERS	0.00960986	-0.0253427	-0.0517822	-0.0448135	0.0465602	0.0196049	0.0322884	0.163392
REACTOME_PHASE_I_FUNCTIONALIZATION_OF_COMPOUNDS	-0.00630681	-0.00351379	-0.0412397	-0.0549177	0.0412297	-0.000399147	0.0386248	0.162364
WP_MIRNA_REGULATION_OF_PROSTATE_CANCER_SIGNALING_PATHWAYS	-0.07175	0.000255596	-0.0743455	0.00389327	0.124148	-0.0499689	0.0557921	0.162133
SIG_PIP3_SIGNALING_IN_B_LYMPHOCYTES	-0.033767	-0.0387247	-0.0169112	-0.304115	-0.237416	0.0549258	0.0284661	0.161967
KEGG_JAK_STAT_SIGNALING_PATHWAY	0.0269117	-0.0758445	-0.146773	0.215662	0.17648	0.087534	0.077041	0.161931
WP_MELATONIN_METABOLISM_AND_EFFECTS	-0.00711786	0.0137179	-0.107369	0.0857354	0.0840656	-0.0161518	-0.0231371	0.161907
REACTOME_CYTOSOLIC_TRNA_AMINOACYLATION	0.138876	-0.0988193	0.050158	-0.0741961	-0.104906	0.255845	-0.0435555	0.161068
CONRAD_STEM_CELL	-0.0500754	-0.0302177	-0.118058	0.132663	-0.0117715	-0.0132709	0.059219	0.16091
GARGALOVIC_RESPONSE_TO_OXIDIZED_PHOSPHOLIPIDS_MAGENTA_UP	-0.0930736	0.0314274	-0.0816193	0.13662	0.0705808	-0.0631485	0.0548194	0.160561
REACTOME_SIGNALING_BY_NUCLEAR_RECEPTORS	-0.046705	0.0225806	-0.0189887	0.0166497	0.0563689	-0.0368716	0.0157511	0.160005
REACTOME_METABOLISM_OF_FAT_SOLUBLE_VITAMINS	0.0949146	0.0727282	-0.309966	0.0143185	0.179887	0.0124275	-0.0129815	0.159405
NUYTTEN_NIPP1_TARGETS_UP	-0.0139449	-0.0065686	-0.0425443	0.0257198	0.0294569	-0.0102791	0.0102949	0.159375
WP_VITAMIN_B12_METABOLISM	-0.0859745	-0.0373071	-0.0531833	0.448251	0.0689771	0.0425217	-0.0860678	0.159302
REACTOME_INTERACTION_BETWEEN_L1_AND_ANKYRINS	-0.0227846	0.0131483	-0.0171988	0.0463195	0.0364169	-0.0154324	0.000236573	0.158987
CHARAFE_BREAST_CANCER_BASAL_VS_MESENCHYMAL_DN	-0.20265	0.1412	-0.155291	0.12018	0.19143	-0.20039	0.00809608	0.158969
REACTOME_CYTOSOLIC_SENSORS_OF_PATHOGEN_ASSOCIATED_DNA	-0.0540834	-0.0207012	-0.0314831	0.106705	0.0635233	-0.00898631	0.0446562	0.15879
REACTOME_CHONDROITIN_SULFATE_DERMATAN_SULFATE_METABOLISM	0.120738	0.0811814	-0.291819	-0.00532839	0.281641	0.0345923	-0.0897557	0.158282
MATZUK_SPERMATOCYTE	0.00349565	-0.00250916	0.00850991	0.0299332	0.0351326	0.0156958	-0.0292373	0.158091
REACTOME_PRE_NOTCH_EXPRESSION_AND_PROCESSING	-0.0446616	-0.00366133	-0.0183705	0.0636602	0.0493672	-0.018313	0.0232241	0.157763
REACTOME_SULFUR_AMINO_ACID_METABOLISM	0.0870652	-0.0485772	0.0758991	0.120521	-0.0753323	0.192081	-0.00359739	0.157742
HOFFMANN_PRE_BI_TO_LARGE_PRE_BII_LYMPHOCYTE_DN	-0.00530756	-0.00320359	-0.0817271	0.0267979	0.0510653	-0.0126349	0.000472049	0.157612
MURAKAMI_UV_RESPONSE_6HR_UP	0.0187912	-0.0252886	-0.0413614	0.00442143	0.0574204	0.0319237	0.0352031	0.157166
REACTOME_DEADENYLATION_OF_MRNA	-0.0510099	0.00883549	-0.0354337	-0.025022	0.0845455	-0.043637	-0.00444204	0.156757
CASORELLI_APL_SECONDARY_VS_DE_NOVO_UP	-0.0806384	-0.00469416	-0.134855	0.15181	0.084331	-0.0516455	0.057255	0.156401
ENK_UV_RESPONSE_EPIDERMIS_DN	-0.043144	-0.00555085	-0.0377161	0.0457167	0.0619661	-0.0241604	0.0262953	0.156381
DARWICHE_PAPILLOMA_RISK_LOW_DN	-0.063105	0.0135709	-0.0300697	0.0726785	0.0493234	-0.0440723	-0.00773146	0.155166
RICKMAN_TUMOR_DIFFERENTIATED_WELL_VS_MODERATELY_UP	0.0202864	-0.0537088	-0.0748556	-0.151194	-0.190927	0.0792601	0.0723566	0.154205
BENPORATH_PRC2_TARGETS	-0.0236992	-0.0666398	-0.0412631	-0.014535	0.00526965	-5.80034e-05	-0.0188923	0.154204
DEURIG_T_CELL_PROLYMPHOCYTIC_LEUKEMIA_DN	-0.0119376	-0.0256804	-0.00754149	0.012504	0.0457793	0.00571942	-0.021154	0.154177
KEGG_AMYOTROPHIC_LATERAL_SCLEROSIS_ALS	-0.0543253	-0.000393189	0.0741942	-0.0442445	-0.00404	-0.00125811	-0.0113199	0.153532
BIOCARTA_EIF4_PATHWAY	-0.0270753	0.0112769	-0.0197553	-0.0592338	0.0626566	-0.0225751	0.00410137	0.153028
REACTOME_RUNX1_REGULATES_GENES_INVOLVED_IN_MEGAKARYOCYTE_DIFFERENTIATION_AND_PLATELET_FUNCTION	-0.05322	-0.00927021	0.0214879	0.0967983	0.107651	-0.00651323	-0.0704305	0.152748
PID_S1P_S1P1_PATHWAY	-0.0113206	0.0447765	-0.0910401	0.0421377	0.0728149	-0.0286634	0.0377613	0.152417
ZHOU_INFLAMMATORY_RESPONSE_LIVE_DN	0.0522655	-0.0684272	-0.0166631	-0.00333383	0.00786177	0.0898142	-0.0567374	0.151913
SCIAN_CELL_CYCLE_TARGETS_OF_TP53_AND_TP73_DN	0.113377	0.136264	-0.0956881	0.0674538	-0.363564	0.169472	0.200934	0.151673
KONDO_PROSTATE_CANCER_HCP_WITH_H3K27ME3	-0.138869	0.0227266	0.11293	-0.0791734	-0.0494984	-0.0461591	0.0109934	0.151618
SMIRNOV_RESPONSE_TO_IR_2HR_DN	-0.164738	-0.00993486	-0.0493945	0.209006	-0.0661084	-0.0788885	0.00202309	0.151023
WP_SARSCOV2_INNATE_IMMUNITY_EVASION_AND_CELLSPECIFIC_IMMUNE_RESPONSE	-0.0862502	0.00408476	-0.0621788	0.113596	0.071862	-0.0518412	0.0440452	0.150688
NOUZOVA_TRETINOIN_AND_H4_ACETYLATION	0.015712	0.0134516	-0.00132641	-0.0256325	0.00856157	0.0120431	-0.0334176	0.150572
FIGUEROA_AML_METHYLATION_CLUSTER_7_UP	0.0210044	0.00195523	-0.0250476	0.106121	0.020707	0.0345627	-0.0579318	0.150346
DITTMER_PTHLH_TARGETS_DN	0.0277837	-0.0164813	-0.0310983	0.0664453	0.0638075	0.0392428	-0.0234796	0.149796
DAIRKEE_CANCER_PRONE_RESPONSE_BPA	0.0213689	0.0197072	0.050248	0.00817793	0.0210576	0.0386179	-0.0163543	0.149659
WP_ARYL_HYDROCARBON_RECEPTOR_PATHWAY	-0.110563	0.00607955	0.0327224	0.0109958	0.0642976	-0.0530698	0.0420421	0.149285
REACTOME_SMAD2_SMAD3_SMAD4_HETEROTRIMER_REGULATES_TRANSCRIPTION	-0.0547415	-0.0174418	-0.0465998	0.0719137	0.0310694	-0.0232748	0.0502857	0.148359
IGLESIAS_E2F_TARGETS_UP	-0.0078444	0.0154609	-0.035118	0.0515094	0.0173895	-0.00871408	0.0072046	0.148321
WNT_SIGNALING	-0.0748179	0.0114398	-0.00847072	0.0227284	0.075335	-0.046578	0.0302612	0.14814
SMIRNOV_CIRCULATING_ENDOTHELIOCYTES_IN_CANCER_UP	-0.0226412	0.000823532	-0.18938	0.0937911	0.144927	-0.0335906	0.0373789	0.147771
BILBAN_B_CLL_LPL_UP	0.0262594	0.0104687	-0.145713	0.0939672	0.0507684	0.00928631	0.0238773	0.147346
WAMUNYOKOLI_OVARIAN_CANCER_LMP_DN	0.000371829	0.0226012	-0.0692508	0.0639154	0.0403225	-0.0123675	-0.014577	0.146425
ZHOU_CELL_CYCLE_GENES_IN_IR_RESPONSE_6HR	0.207124	0.149601	0.164682	0.194739	-0.0233604	0.255282	-0.0686501	0.145239
BARRIER_COLON_CANCER_RECURRENCE_UP	0.0185776	0.00255758	-0.0254965	-0.0920817	-0.0161109	0.0232728	0.0174557	0.145077
REACTOME_NICOTINATE_METABOLISM	0.114999	-0.0678601	-0.390679	-0.24307	0.194417	0.0536426	-0.0228781	0.144808
MIYAGAWA_TARGETS_OF_EWSR1_ETS_FUSIONS_DN	0.00582655	-0.0227974	-0.123102	-0.0899045	0.0568881	-0.0116604	-0.00325625	0.144279
WANG_LMO4_TARGETS_UP	0.0148799	0.000106613	-0.0310242	0.00220292	0.0187592	0.00797119	-0.00582095	0.143569
REACTOME_NONHOMOLOGOUS_END_JOINING_NHEJ	-0.068838	-0.0157393	0.181077	-0.303829	-0.132877	0.0826017	0.0153581	0.143162
HERNANDEZ_MITOTIC_ARREST_BY_DOCETAXEL_2_UP	-0.0088697	-0.0251759	-0.141703	0.0904124	0.102319	-0.00562209	0.0336322	0.142348
PASINI_SUZ12_TARGETS_UP	-0.0352541	0.0176288	-0.0828714	0.0521527	0.0528502	-0.0363381	0.0450659	0.142323
REACTOME_HEPARAN_SULFATE_HEPARIN_HS_GAG_METABOLISM	0.0906049	0.0704855	-0.276348	-0.0414355	0.228171	0.0011432	-0.0559542	0.141764
MCCLUNG_DELTA_FOSB_TARGETS_8WK	-0.0172332	0.00830365	0.0268743	-0.177897	0.0113598	0.0159418	0.0102731	0.141663
CROONQUIST_IL6_DEPRIVATION_DN	0.143882	0.127668	0.0351983	0.0644996	0.217007	0.119541	0.0620407	0.1415
NUYTTEN_EZH2_TARGETS_DN	0.0451807	0.0344405	0.0180052	-0.00761109	0.0033693	0.0424662	-0.0163448	0.141465
REACTOME_TRNA_AMINOACYLATION	0.143488	-0.0982126	0.0583986	-0.140522	-0.0670511	0.245751	-0.0669868	0.141394
NABA_ECM_REGULATORS	0.0489003	0.0262496	-0.133332	0.0582083	0.0296325	0.0191521	0.0184486	0.141366
PUJANA_XPRSS_INT_NETWORK	0.0327085	0.050774	0.0565609	0.0532904	0.120421	0.0446135	-0.0252993	0.140944
TING_SILENCED_BY_DICER	0.0805043	0.0814845	-0.215271	0.150156	0.0986023	0.0278267	0.0572201	0.140798
SCHAEFFER_SOX9_TARGETS_IN_PROSTATE_DEVELOPMENT_DN	-0.034018	0.00587217	0.00589838	0.0185587	0.0598251	-0.0203258	-0.0375233	0.140093
BURTON_ADIPOGENESIS_PEAK_AT_8HR	-0.0229611	-0.0368005	-0.0600868	0.14016	0.0909668	0.0187058	0.0504104	0.13983
MCBRYAN_PUBERTAL_BREAST_6_7WK_UP	-0.052386	0.0174635	-0.0394876	0.0586529	0.00708316	-0.0454051	-0.00589746	0.139471
CAIRO_HEPATOBLASTOMA_CLASSES_DN	-0.0358996	0.0235936	-0.107713	0.0453299	0.0686998	-0.0417842	0.0664056	0.139388
AIYAR_COBRA1_TARGETS_UP	0.0886297	-0.0326502	-0.14726	0.0719711	0.0390798	0.0848921	0.0384257	0.138847
SCHAEFFER_PROSTATE_DEVELOPMENT_AND_CANCER_BOX4_DN	-0.00577376	0.0321979	-0.00912751	0.0622496	0.015792	-0.00564294	-0.00707835	0.138625
MARTINEZ_RB1_TARGETS_UP	-0.0115654	0.00736652	-0.0300359	0.00583677	0.0336663	-0.0166011	-0.00193495	0.136034
REACTOME_VASOPRESSIN_REGULATES_RENAL_WATER_HOMEOSTASIS_VIA_AQUAPORINS	-0.0379319	0.0407258	-0.0247775	0.0519892	0.12188	-0.0336957	0.0105767	0.135865
WANG_ESOPHAGUS_CANCER_VS_NORMAL_DN	0.00336565	0.00406277	-0.0562131	0.0409118	0.0732336	0.000354418	0.0207385	0.135796
TSENG_ADIPOGENIC_POTENTIAL_UP	0.142995	-0.119763	-0.0936467	0.232666	0.0056871	0.220586	-0.0455058	0.135391
ZHONG_RESPONSE_TO_AZACITIDINE_AND_TSA_DN	0.0323735	0.0250693	0.052826	0.0296011	-0.0175734	0.0535958	-0.0450443	0.13444
REACTOME_KINESINS	-0.0900928	0.0500766	-0.0771793	0.141265	0.211959	-0.0615816	0.104956	0.134294
HELLER_SILENCED_BY_METHYLATION_DN	-0.0426996	-0.00450504	-0.0709885	0.140896	-0.00713785	-0.0158383	0.0316128	0.134146
YAMAZAKI_TCEB3_TARGETS_UP	0.00585181	0.033852	-0.128393	-0.00469243	0.0723258	-0.0300515	0.0151577	0.134101
HOUSTIS_ROS	-0.0287151	-0.00220809	-0.0020479	0.0307115	0.0402256	-0.0119565	0.0155549	0.133906
REACTOME_POSTMITOTIC_NUCLEAR_PORE_COMPLEX_NPC_REFORMATION	-0.071228	0.028101	0.188074	-0.113076	-0.0459452	0.0311795	-0.0728366	0.133721
WHITEFORD_PEDIATRIC_CANCER_MARKERS	0.0833838	0.0785499	-0.0137971	0.0479654	0.0659485	0.0574383	0.0457052	0.133651
ZWANG_CLASS_3_TRANSIENTLY_INDUCED_BY_EGF	-0.0934085	-0.00948191	-0.156061	0.178267	0.118631	-0.0646653	0.0792881	0.133264
GARY_CD5_TARGETS_UP	-0.0491679	-0.000847745	-0.0314563	0.0560125	0.0497333	-0.0311986	0.0238566	0.13315
ONKEN_UVEAL_MELANOMA_UP	-0.0128991	0.0122681	-0.0493446	0.0339761	0.0411637	-0.0180463	0.0162972	0.132692
REACTOME_SIGNALING_BY_FGFR	-0.0493688	0.012141	0.0322965	0.031718	0.0099214	-0.0175814	0.0227349	0.13252
SIG_INSULIN_RECEPTOR_PATHWAY_IN_CARDIAC_MYOCYTES	-0.0167413	0.0286436	0.000926192	0.0206633	0.00655966	-0.0165069	0.00260872	0.13231
IKEDA_MIR1_TARGETS_UP	0.0287394	0.010834	-0.123983	0.0675845	0.0922903	0.0078939	0.0231126	0.130504
QI_PLASMACYTOMA_UP	-0.0555177	0.015458	-0.0257237	0.127193	0.0995757	-0.0271879	0.0262032	0.130009
ZHOU_INFLAMMATORY_RESPONSE_LIVE_UP	-0.0372004	-0.0249464	-0.0599538	0.143722	0.0776683	-0.00622089	0.00583697	0.129792
WP_AGERAGE_PATHWAY	0.00758496	0.000210385	-0.0614331	0.0723127	0.070078	0.00506003	-0.00262941	0.129574
REACTOME_NUCLEOBASE_CATABOLISM	0.198933	-0.138939	-0.132067	-0.201565	-0.0424401	0.247047	-0.012479	0.128597
REACTOME_RMTS_METHYLATE_HISTONE_ARGININES	-0.0881459	0.0224486	0.0333857	0.044703	-0.00279684	-0.0447651	0.0291917	0.128533
YAO_TEMPORAL_RESPONSE_TO_PROGESTERONE_CLUSTER_12	0.0329002	0.0325301	-0.0327897	0.105195	0.00906024	0.0290392	-0.00883212	0.127996
LIN_MELANOMA_COPY_NUMBER_DN	0.0391985	0.0239323	-0.0853502	0.00915204	0.0526821	0.00968571	-0.00525669	0.12794
REACTOME_AQUAPORIN_MEDIATED_TRANSPORT	-0.0390721	0.0398707	-0.0206079	0.0508491	0.12151	-0.0348358	0.00988595	0.127427
WP_EGFEGFR_SIGNALING_PATHWAY	-0.0232449	0.00910727	-0.0175918	0.0175849	0.0166647	-0.0224328	0.000120968	0.127424
PEDERSEN_METASTASIS_BY_ERBB2_ISOFORM_7	0.0224515	-0.00695591	-0.0422252	0.0323868	0.0509589	0.0200089	0.00498939	0.126989
NAKAJIMA_MAST_CELL	0.0372331	0.00220554	-0.148354	0.00477417	-0.00759046	0.00848539	0.0306843	0.126084
PUJANA_BRCA2_PCC_NETWORK	0.0401373	0.0396974	0.0598604	0.0285098	0.0863486	0.0511629	-0.0282705	0.125796
PID_INSULIN_GLUCOSE_PATHWAY	-0.0237469	0.0394103	-0.0156641	0.0735049	0.00921148	-0.0200818	0.0164902	0.125492
REACTOME_HS_GAG_BIOSYNTHESIS	0.104769	0.0678382	-0.291155	0.00459872	0.269818	0.00415259	-0.083062	0.124604
RAGHAVACHARI_PLATELET_SPECIFIC_GENES	0.00204656	0.0528715	-0.0795104	0.0867142	0.0982118	-0.0208056	0.00731696	0.124473
KEGG_TASTE_TRANSDUCTION	-0.0037411	0.00841401	0.0226973	-0.0311482	-0.00664244	0.00571918	-0.0176931	0.124333
KARLSSON_TGFB1_TARGETS_DN	-0.0361254	0.00612864	-0.0541044	0.0180096	0.0705578	-0.035572	0.024364	0.124251
ZHANG_RESPONSE_TO_IKK_INHIBITOR_AND_TNF_UP	-0.120139	0.0295947	-0.0725447	0.186724	0.113287	-0.0823969	0.0551371	0.123962
BENPORATH_SOX2_TARGETS	-0.0176314	-0.00431931	0.00907308	0.0117773	0.0225586	-0.00510407	-2.85807e-05	0.123695
WP_IL1_AND_MEGAKARYOCYTES_IN_OBESITY	0.0638132	-0.0128138	-0.197112	0.233894	0.158365	0.0565708	0.0248964	0.123628
MORI_PLASMA_CELL_UP	0.0762153	0.0273763	-0.169392	0.0587627	-0.00444182	0.0366605	0.0330023	0.123438
REACTOME_INFLAMMASOMES	-0.0291698	0.024847	-0.0830435	0.117825	0.085797	-0.0323781	0.00852197	0.123272
DACOSTA_ERCC3_ALLELE_XPCS_VS_TTD_UP	-0.0447941	0.0257578	-0.11229	0.0587246	-0.0808621	-0.0538936	0.0184477	0.122758
WP_MTHFR_DEFICIENCY	-0.014361	-0.0474865	0.103797	0.224989	-0.103766	0.111494	-0.0688421	0.122267
ZHENG_GLIOBLASTOMA_PLASTICITY_DN	-0.081286	0.0527015	-0.223723	0.122949	0.0659135	-0.110176	0.071614	0.120961
BIDUS_METASTASIS_DN	0.00702969	-0.0176809	-0.0631922	-0.0929042	-0.0662416	0.0117641	0.0346848	0.120897
REACTOME_INTERFERON_GAMMA_SIGNALING	-0.177274	0.028588	-0.0320665	0.248754	0.108486	-0.104582	0.035298	0.120635
HERNANDEZ_MITOTIC_ARREST_BY_DOCETAXEL_1_UP	-0.0183633	0.0186093	-0.233859	0.185779	0.117724	-0.0419341	0.058333	0.120073
REACTOME_IKK_COMPLEX_RECRUITMENT_MEDIATED_BY_RIP1	-0.0521577	-0.00899112	0.0095484	-0.0690437	0.0453945	-0.0233033	0.0373033	0.120022
FAELT_B_CLL_WITH_VH_REARRANGEMENTS_DN	0.0388125	0.00500535	-0.0402474	-0.0259084	0.0203015	0.0233815	-0.0252909	0.119498
SHEDDEN_LUNG_CANCER_GOOD_SURVIVAL_A4	-0.0803316	-0.0131868	-0.0755318	0.0808795	0.0858036	-0.063927	0.00141309	0.11886
WP_KIT_RECEPTOR_SIGNALING_PATHWAY	-0.0718765	0.0147197	-0.00623087	-0.0238833	0.0169573	-0.0469557	0.0651283	0.118799
VERHAAK_GLIOBLASTOMA_MESENCHYMAL	0.0490765	0.00679794	-0.141104	0.0624292	0.0910827	0.0201338	0.0230271	0.117767
REACTOME_NEUROTRANSMITTER_RELEASE_CYCLE	0.0373324	0.0188904	-0.143472	0.101367	0.0385335	0.0103249	0.0272739	0.116917
DELACROIX_RAR_BOUND_ES	-0.0388071	0.000477585	-0.00326813	0.00535228	-0.00760397	-0.023462	0.0236914	0.116277
WATANABE_RECTAL_CANCER_RADIOTHERAPY_RESPONSIVE_DN	0.00688636	0.00691082	-0.0576984	0.0505945	-0.00304431	-0.00114827	0.0052188	0.115942
BAE_BRCA1_TARGETS_UP	0.00374755	0.00302975	-0.0257499	0.018679	0.00498541	0.000393906	0.011137	0.114869
REACTOME_ACTIVATION_OF_BH3_ONLY_PROTEINS	-0.0291152	0.0435747	0.0137744	0.0342899	0.013138	-0.0223558	0.0223087	0.114782
WP_WNT_SIGNALING_PATHWAY_AND_PLURIPOTENCY	-0.0764753	0.0217726	-0.0404377	0.0631991	0.119256	-0.0625408	0.0250816	0.11346
CHARAFE_BREAST_CANCER_LUMINAL_VS_MESENCHYMAL_DN	-0.00227643	0.0240574	-0.0843793	0.0765126	0.104716	-0.0184307	0.00988769	0.113247
SU_PANCREAS	-0.529068	0.211337	-0.108596	-0.073359	-0.134601	-0.521923	-0.292906	0.113236
THEODOROU_MAMMARY_TUMORIGENESIS	0.115722	0.0181328	-0.206445	-0.391647	0.184696	0.0734336	0.104584	0.112091
KIM_WT1_TARGETS_12HR_UP	-0.0209192	-0.00814287	-0.0858982	-0.0361477	0.0492171	-0.0257864	0.0601182	0.111309
MARZEC_IL2_SIGNALING_UP	-0.0400564	-0.0361802	-0.0999078	0.0304153	0.0671511	-0.025712	0.0756908	0.111205
GROSS_HYPOXIA_VIA_ELK3_ONLY_UP	0.0374619	-0.0822122	-0.164107	0.194615	0.160393	0.0493265	-0.0873769	0.111101
REACTOME_RNA_POLYMERASE_III_TRANSCRIPTION_INITIATION_FROM_TYPE_1_PROMOTER	-0.0662006	0.0466565	-0.0406032	0.00741933	0.0666092	-0.0608713	0.0844072	0.110483
REACTOME_TRANSCRIPTIONAL_REGULATION_BY_THE_AP_2_TFAP2_FAMILY_OF_TRANSCRIPTION_FACTORS	-0.058329	-0.00589036	-0.0512203	0.0348158	0.0552198	-0.0511117	0.006878	0.10893
HUANG_GATA2_TARGETS_UP	-0.0132021	-0.00138726	-0.0574199	0.0475422	0.0643739	-0.0147873	0.0211168	0.108929
CHIANG_LIVER_CANCER_SUBCLASS_CTNNB1_DN	0.0630991	-0.0215149	-0.113426	0.0339993	0.0314392	0.0450857	0.0028475	0.108708
MORI_LARGE_PRE_BII_LYMPHOCYTE_UP	0.0406534	0.0515294	0.00337548	0.0199035	0.123264	0.0290047	0.0285835	0.108691
ROSS_LEUKEMIA_WITH_MLL_FUSIONS	0.05772	-0.0148794	-0.0769633	0.0163733	0.0129708	0.0455121	0.00456459	0.107429
LINDGREN_BLADDER_CANCER_CLUSTER_2B	-0.0275193	0.0325908	-0.114121	0.145505	0.129708	-0.0413372	0.0122682	0.107241
NADLER_OBESITY_UP	0.0083446	0.01962	-0.0723656	-0.0354391	0.0183352	-0.013138	0.0339909	0.106905
MMS_MOUSE_LYMPH_HIGH_4HRS_UP	-0.0618509	0.0220032	-0.0179391	-0.0365891	0.0732286	-0.0560032	0.0211294	0.106817
REACTOME_SYNTHESIS_OF_SUBSTRATES_IN_N_GLYCAN_BIOSYTHESIS	0.136049	-0.0367879	-0.180827	0.295638	-0.372062	0.208997	0.0863692	0.105908
BAELDE_DIABETIC_NEPHROPATHY_UP	0.0406925	-0.0105676	-0.104802	0.108809	0.0519968	0.03222	0.0206895	0.105467
KAAB_FAILED_HEART_ATRIUM_UP	0.0576254	-0.0334501	0.0357078	0.263827	-0.0752257	0.138641	-0.067865	0.105456
FIGUEROA_AML_METHYLATION_CLUSTER_1_DN	-0.0262859	-0.0259926	-0.0063462	-0.0421686	0.037785	-0.0156283	-0.0413363	0.10417
REACTOME_SYNTHESIS_OF_ACTIVE_UBIQUITIN_ROLES_OF_E1_AND_E2_ENZYMES	-0.0463002	-0.0196284	0.0313847	-0.0302017	0.0225316	-0.0123214	0.0122606	0.103969
REACTOME_G2_M_DNA_DAMAGE_CHECKPOINT	-0.023498	0.036607	0.0621194	0.0180154	-0.0383256	0.00634864	0.0151621	0.103811
BLANCO_MELO_BRONCHIAL_EPITHELIAL_CELLS_INFLUENZA_A_DEL_NS1_INFECTION_UP	-0.150708	-0.00900704	-0.0373434	0.172011	0.105736	-0.0908651	0.0445721	0.103792
GRADE_COLON_VS_RECTAL_CANCER_DN	-0.105883	-0.0382599	-0.0101745	-0.0219892	0.110614	-0.0575896	0.0501944	0.103357
SANSOM_APC_TARGETS	0.0130677	-0.0490433	0.00751443	0.0256085	0.000243424	0.044624	-0.0200765	0.103342
LU_TUMOR_VASCULATURE_UP	0.014178	-0.011827	-0.0675043	0.170937	0.101176	0.0212959	-0.054259	0.101445
FLORIO_NEOCORTEX_BASAL_RADIAL_GLIA_DN	0.0654122	0.0746572	-0.0978921	0.0636321	-0.000362435	0.0198555	0.0278795	0.100338
MIKKELSEN_ES_ICP_WITH_H3K4ME3_AND_H3K27ME3	0.0669159	-0.202315	-0.00403739	-0.177228	-0.0831582	0.170165	-0.0649916	0.100117
BRUNO_HEMATOPOIESIS	0.00853614	0.020059	-0.133655	0.171312	0.133179	-0.0157409	-0.040695	0.0999979
REACTOME_ADORA2B_MEDIATED_ANTI_INFLAMMATORY_CYTOKINES_PRODUCTION	-0.0215073	0.0362693	-0.0384332	-0.00106614	0.1848	-0.027964	0.0336003	0.0999231
FIGUEROA_AML_METHYLATION_CLUSTER_3_DN	-0.0852877	-0.0114598	0.0296103	0.051437	0.0641303	-0.0392989	0.0130535	0.0996914
PID_LIS1_PATHWAY	-0.035077	0.0473652	-0.00822355	0.0664138	0.0487716	-0.0362275	0.00294836	0.0991117
YAMASHITA_LIVER_CANCER_STEM_CELL_UP	-0.0616244	0.00815704	-0.0247416	0.00512792	-0.0362891	-0.0456305	0.0455809	0.0987477
ZHONG_SECRETOME_OF_LUNG_CANCER_AND_ENDOTHELIUM	0.00179163	0.0124325	-0.0388971	0.0304024	0.0339593	-0.00922407	0.00182404	0.0984628
KEGG_RNA_POLYMERASE	-0.0418514	0.0429214	-0.0399623	0.0823181	-0.0170584	-0.035663	0.0636904	0.0982189
DASU_IL6_SIGNALING_UP	-0.0667492	0.00907102	-0.0221809	0.113505	0.119061	-0.0402586	0.0357536	0.0979074
MARSHALL_VIRAL_INFECTION_RESPONSE_DN	-0.226041	0.0277724	-0.163792	0.185063	0.16571	-0.189733	0.140562	0.0969654
REACTOME_IRON_UPTAKE_AND_TRANSPORT	-0.0391909	0.0108775	-0.0278896	0.0632826	0.0623615	-0.0331671	0.0065305	0.096939
REACTOME_ANTI_INFLAMMATORY_RESPONSE_FAVOURING_LEISHMANIA_PARASITE_INFECTION	-0.0173209	0.0316505	-0.0689951	-0.0110868	0.135876	-0.0377332	0.0236537	0.0962526
WP_7OXOC_AND_7BETAHC_PATHWAYS	0.0900582	-0.039821	0.0028909	0.0515579	-0.0150715	0.115808	-0.067661	0.0958492
CHEBOTAEV_GR_TARGETS_UP	-0.0798894	-0.0398193	0.0880166	-0.320665	-0.361015	0.0516864	0.0764513	0.0958335
KEGG_CELL_CYCLE	-0.0317288	0.0511623	0.00793432	0.0200314	-0.012088	-0.0288455	0.0309197	0.0956537
BREDEMEYER_RAG_SIGNALING_NOT_VIA_ATM_DN	0.106101	-0.0779053	0.00940794	-0.045992	-0.0854991	0.149765	-0.124551	0.0956056
TENEDINI_MEGAKARYOCYTE_MARKERS	-0.0548221	0.0136267	-0.0649795	0.131029	0.0988687	-0.0499465	-0.00713057	0.0951666
YAO_TEMPORAL_RESPONSE_TO_PROGESTERONE_CLUSTER_2	-0.015785	0.012869	-0.0480284	0.0768677	0.0865505	-0.0247713	-0.0513648	0.0947349
STANELLE_E2F1_TARGETS	-0.0189791	0.0314096	0.0323749	0.0248342	0.0144173	-0.00937693	-0.000855024	0.0947318
DARWICHE_SKIN_TUMOR_PROMOTER_UP	-0.00591417	-0.00138325	-0.00633932	0.0303326	0.0609654	-0.000777493	-0.00642728	0.0940987
BHAT_ESR1_TARGETS_VIA_AKT1_DN	0.000310163	0.0160889	-0.107002	-0.253164	-0.00540799	-0.0262672	0.0356868	0.0938595
SWEET_KRAS_ONCOGENIC_SIGNATURE	-0.00380765	-0.0145345	-0.0403481	0.0163261	0.0382718	-0.0025464	0.0221965	0.09357
NABA_SECRETED_FACTORS	0.0344109	0.00234447	-0.127552	0.0342173	0.0446017	0.00383501	0.0271124	0.0931591
NAKAYAMA_FRA2_TARGETS	-0.0470904	-0.0481142	-0.117215	0.246882	0.141748	-0.00847144	0.0599071	0.0929881
YAGI_AML_FAB_MARKERS	-0.0115148	0.0291385	-0.0338784	-0.0040506	0.0243504	-0.0264042	0.015637	0.0926579
LINDGREN_BLADDER_CANCER_HIGH_RECURRENCE	-0.0640061	0.101799	-0.156275	0.104361	0.0685303	-0.109648	0.0656266	0.0923142
APPEL_IMATINIB_RESPONSE	-0.00975946	0.0501414	-0.0767824	-0.0258638	-0.134357	-0.0336859	-0.00724658	0.0912199
REACTOME_CILIUM_ASSEMBLY	-0.0319626	0.020713	-0.000829292	0.0221196	0.0165907	-0.0265539	0.0178381	0.0910019
ACEVEDO_LIVER_CANCER_WITH_H3K9ME3_DN	-0.0938868	0.00713504	0.0103153	0.0998797	0.0539123	-0.065625	-0.0920703	0.0909338
KEGG_UBIQUITIN_MEDIATED_PROTEOLYSIS	-0.0693038	0.0163626	0.0211587	0.00537931	0.0413508	-0.0466992	0.0171431	0.0906451
ZHANG_GATA6_TARGETS_DN	0.371471	-0.0243002	-0.0501066	-0.074184	-0.350431	0.405446	-0.138367	0.0905818
REACTOME_MAPK_TARGETS_NUCLEAR_EVENTS_MEDIATED_BY_MAP_KINASES	-0.114815	-0.0262327	0.0764248	-0.0191187	-0.0107949	-0.0346791	0.0575466	0.0904377
BIOCARTA_PPARA_PATHWAY	-0.0942015	0.0314874	-0.0996138	0.145315	0.108584	-0.0895851	0.058156	0.090149
WU_SILENCED_BY_METHYLATION_IN_BLADDER_CANCER	-0.231389	0.00805066	-0.178689	0.113623	0.143171	-0.20124	0.155274	0.0897686
OSMAN_BLADDER_CANCER_DN	-0.012894	0.00612158	-0.00370977	-0.0123599	0.0106132	-0.0124908	0.0075531	0.0896119
REACTOME_FGFR2_MUTANT_RECEPTOR_ACTIVATION	-0.0516177	0.0762571	-0.0673376	0.138786	0.0410297	-0.0595868	0.0714122	0.0893495
ZHAN_LATE_DIFFERENTIATION_GENES_UP	0.0515625	0.0085492	-0.120089	0.0285936	0.0122334	0.0209455	0.0392688	0.0890763
KAAB_HEART_ATRIUM_VS_VENTRICLE_UP	-0.0127444	0.00576563	-0.0709669	0.0677509	0.0584979	-0.0214627	0.0225868	0.0875908
WANG_METASTASIS_OF_BREAST_CANCER_ESR1_DN	0.00140551	-0.128837	-0.0950169	0.167777	-0.0896895	0.0653597	-0.0113054	0.0875825
BEIER_GLIOMA_STEM_CELL_UP	0.330658	-0.309227	0.228156	-1.038	0.00197922	0.512098	-0.755716	0.0871692
NAKAYAMA_SOFT_TISSUE_TUMORS_PCA2_UP	0.112149	0.0396553	0.0229979	-0.0712381	0.0771101	0.0976709	-0.0462874	0.0861456
LIM_MAMMARY_LUMINAL_PROGENITOR_UP	0.186327	0.0234121	-0.286156	0.120659	0.221101	0.0793779	-0.138094	0.0860667
BENPORATH_SUZ12_TARGETS	-0.000197031	-0.0467356	-0.0740507	-0.025142	0.00533696	-0.00142046	0.00641109	0.0856545
ZAMORA_NOS2_TARGETS_DN	-0.044863	0.0150368	-0.0101422	0.0316915	0.0493007	-0.0364198	0.024539	0.0846961
FONTAINE_PAPILLARY_THYROID_CARCINOMA_DN	0.0636914	-0.178892	0.0548729	-0.35056	-0.526548	0.219869	-0.112982	0.0846451
SANA_TNF_SIGNALING_UP	-0.0722429	0.017937	-0.0922711	0.16377	0.068929	-0.0649614	0.0461343	0.0845097
HOFFMANN_LARGE_TO_SMALL_PRE_BII_LYMPHOCYTE_DN	-0.0869036	-0.00278231	-0.0185701	0.134504	0.0531123	-0.0497894	0.0378895	0.0834141
ZHOU_INFLAMMATORY_RESPONSE_LPS_UP	-0.0671783	-0.0247892	-0.0529122	0.16088	0.0880921	-0.0381076	0.00364957	0.0831301
SCHAEFFER_PROSTATE_DEVELOPMENT_12HR_DN	-0.0418408	0.0293521	-0.0197513	-0.00658213	0.0722795	-0.0423812	0.044204	0.0828944
LEE_CALORIE_RESTRICTION_NEOCORTEX_DN	0.0109428	0.00555138	0.00582238	-0.0461145	0.0178514	0.0118305	0.00179667	0.0827819
CHIARADONNA_NEOPLASTIC_TRANSFORMATION_KRAS_CDC25_DN	-0.0584594	0.0343579	-0.219663	0.264273	0.258589	-0.0862767	0.0576904	0.0824554
BURTON_ADIPOGENESIS_9	-0.106438	0.0490412	-0.140543	0.148645	0.183681	-0.12192	0.054082	0.0823251
GUILLAUMOND_KLF10_TARGETS_UP	-0.0466063	-0.0354365	-0.0776855	0.0552821	0.0753776	-0.0494581	-0.0824927	0.0817388
WESTON_VEGFA_TARGETS_12HR	0.0824349	-0.046731	-0.145027	0.221208	0.128354	0.0678439	-0.123217	0.0816555
SILIGAN_BOUND_BY_EWS_FLT1_FUSION	-0.00531494	0.0318342	-0.139768	0.0237769	0.0306867	-0.0496711	0.0224141	0.0815751
LIAN_LIPA_TARGETS_6M	0.0783835	0.148192	-0.163169	0.0104266	0.0506635	-0.0345594	-0.0738086	0.0812127
REACTOME_FORMATION_OF_THE_EARLY_ELONGATION_COMPLEX	-0.0333466	0.0453999	-0.0140892	0.0922444	0.0457847	-0.0233143	0.0859782	0.0806567
REACTOME_CLATHRIN_MEDIATED_ENDOCYTOSIS	-0.0235625	-0.00978926	0.0204254	-0.0270597	-0.0135174	-0.00463618	0.00615538	0.0804749
KENNY_CTNNB1_TARGETS_DN	-0.0173871	-0.00304558	-0.0693448	0.0121987	0.0762551	-0.0317463	-0.000236501	0.0794646
KEGG_RNA_DEGRADATION	0.0721891	-0.000110005	0.0892425	-0.00359236	-0.141972	0.121323	-0.0974806	0.0794534
KUUSELO_PANCREATIC_CANCER_19Q13_AMPLIFICATION	-0.104721	0.0377437	0.126985	0.0646806	0.0469182	-0.0260282	0.0796554	0.0787495
REACTOME_HIV_TRANSCRIPTION_INITIATION	-0.055287	0.0520685	0.0486608	0.0902542	-0.0330654	-0.0149954	0.089948	0.0768027
CHOW_RASSF1_TARGETS_UP	0.0594106	0.023156	-0.0178553	-0.0752127	-0.033853	0.0432939	-0.0203708	0.0763395
JACKSON_DNMT1_TARGETS_UP	-0.0709038	0.0182534	-0.0399799	0.117304	0.166323	-0.0556003	0.0529887	0.0763009
SANSOM_APC_TARGETS_DN	-0.0227471	-0.0413708	-0.0435848	0.0351389	-0.0385826	0.0041646	0.0622181	0.0762663
VANTVEER_BREAST_CANCER_METASTASIS_DN	0.0815235	-0.0136067	-0.0528765	0.0973227	-0.0260134	0.0714812	-0.133426	0.0759711
SU_TESTIS	0.120207	0.029535	0.136816	-0.241223	-0.444962	0.169436	-0.501335	0.0758823
NAKAMURA_ADIPOGENESIS_LATE_DN	0.0349028	0.0224021	-0.0519776	0.00181345	0.108332	0.0038871	-0.0498043	0.0758616
PLASARI_TGFB1_SIGNALING_VIA_NFIC_10HR_DN	-0.341844	0.0211177	-0.120196	0.24644	-0.227468	-0.21226	0.342262	0.0749942
BENITEZ_GBM_PROTEASOME_INHIBITION_RESPONSE	-0.09399	0.00809503	0.0220377	0.0312641	0.043869	-0.0561465	0.056869	0.0749095
MALONEY_RESPONSE_TO_17AAG_UP	-0.0010745	0.0175449	-0.0629576	0.0552862	0.00510147	-0.0156369	0.0231052	0.0747343
REACTOME_BIOSYNTHESIS_OF_THE_N_GLYCAN_PRECURSOR_DOLICHOL_LIPID_LINKED_OLIGOSACCHARIDE_LLO_AND_TRANSFER_TO_A_NASCENT_PROTEIN	0.143277	-0.0390721	-0.186725	0.331165	-0.362124	0.184598	0.0438642	0.0741618
WOO_LIVER_CANCER_RECURRENCE_DN	-0.0582051	-0.0359636	0.193562	0.158596	-0.134948	0.0697824	-0.194909	0.0739918
WESTON_VEGFA_TARGETS_6HR	0.0461424	-0.0196677	-0.0708784	0.165071	0.0431814	0.0438932	-0.064946	0.0739584
EBAUER_TARGETS_OF_PAX3_FOXO1_FUSION_UP	-0.0314466	0.0204361	-0.024606	0.0680774	0.0712736	-0.0329875	0.00117676	0.0735371
NABA_MATRISOME_ASSOCIATED	0.0447623	0.00527501	-0.124747	0.0136013	0.076761	0.00418653	0.0124378	0.0733567
VANDESLUIS_COMMD1_TARGETS_GROUP_3_UP	0.0632289	-0.0306827	-0.0218723	0.00294569	0.0813833	0.0634643	-0.0374457	0.0731403
REACTOME_ACTIVATION_OF_KAINATE_RECEPTORS_UPON_GLUTAMATE_BINDING	-0.0368615	0.0559386	-0.010685	0.0154003	0.180821	-0.0466755	0.0188715	0.0729365
CADWELL_ATG16L1_TARGETS_DN	-0.0699796	-0.0316665	-0.116276	-0.00153521	0.00814839	-0.0602745	0.113393	0.0729282
KEGG_VASCULAR_SMOOTH_MUSCLE_CONTRACTION	-0.022683	0.0236411	-0.0224341	-0.0253445	0.0384704	-0.0336887	0.0102127	0.0720119
KEGG_ACUTE_MYELOID_LEUKEMIA	-0.0130757	0.00765245	-0.0830789	0.029069	0.0223595	-0.0328483	0.0193887	0.0719129
BLANCO_MELO_COVID19_BRONCHIAL_EPITHELIAL_CELLS_SARS_COV_2_INFECTION_UP	-0.078013	0.00498607	-0.0787491	0.217414	0.211239	-0.0596499	0.0462398	0.0712512
KEGG_LYSOSOME	-0.0270934	-0.0137706	0.00456906	-0.0751138	-0.083423	-0.00545118	0.013616	0.0710896
CHEMNITZ_RESPONSE_TO_PROSTAGLANDIN_E2_UP	0.120281	0.0643198	0.0172673	-0.0747283	0.0298033	0.0915502	-0.0452313	0.0700375
TCGA_GLIOBLASTOMA_COPY_NUMBER_DN	0.0382657	-0.00262443	-0.0555479	-0.106474	0.189516	0.00980113	-0.0684131	0.0696242
PARK_APL_PATHOGENESIS_DN	-0.0300611	-0.0023641	-0.0469352	0.0901661	0.0386742	-0.023418	0.0319201	0.0696118
WOOD_EBV_EBNA1_TARGETS_UP	-0.0160492	0.0179349	-0.0562215	0.106093	0.0120466	-0.0199001	0.0272681	0.0694199
KAUFFMANN_DNA_REPLICATION_GENES	-0.0168236	0.0353509	0.0551679	0.0970335	-0.032678	0.00924217	-0.02657	0.0694095
MULLIGHAN_MLL_SIGNATURE_2_UP	0.016765	-0.00395713	-0.0285808	0.038352	0.00626388	0.0134567	0.00442823	0.0689982
REACTOME_SIGNALING_BY_NOTCH3	-0.0514699	-0.0176195	0.0167101	0.0383129	0.0313853	-0.0225218	0.00632888	0.0684332
FLECHNER_PBL_KIDNEY_TRANSPLANT_REJECTED_VS_OK_DN	-0.0135405	0.00181524	0.0246221	-0.0333684	-0.0124217	-0.00256827	-0.01572	0.0684293
PYEON_CANCER_HEAD_AND_NECK_VS_CERVICAL_UP	-0.0109832	0.00883218	0.027486	0.11552	-0.0358806	0.0189246	-0.0025628	0.0679917
FONTAINE_THYROID_TUMOR_UNCERTAIN_MALIGNANCY_DN	0.10321	-0.0908309	-0.063791	0.0496374	0.0736541	0.122447	0.00352687	0.0670071
GOLDRATH_ANTIGEN_RESPONSE	0.0168763	-0.00188226	-0.0358246	0.0490871	0.0122013	0.0118356	0.00834733	0.0667981
KESHELAVA_MULTIPLE_DRUG_RESISTANCE	-0.00696532	-0.0243563	-0.0121992	-0.0945341	0.0378762	0.0017472	0.0155542	0.0659094
REACTOME_TRANSCRIPTIONAL_ACTIVITY_OF_SMAD2_SMAD3_SMAD4_HETEROTRIMER	-0.0671481	-0.0109933	-0.050563	0.106385	0.121903	-0.0507755	0.0387132	0.0659051
AMIT_EGF_RESPONSE_60_MCF10A	-0.0466206	0.0400243	-0.0596372	0.152033	0.1062	-0.0545357	0.0137026	0.0653438
HAMAI_APOPTOSIS_VIA_TRAIL_DN	-0.0316535	0.0136331	0.000214574	0.0410144	-0.0277474	-0.0173626	0.0356634	0.0649272
MCLACHLAN_DENTAL_CARIES_UP	0.0391142	-0.0131394	-0.125982	0.14699	0.149369	0.0191103	0.0311068	0.0648455
REACTOME_SIGNALING_BY_FGFR2	-0.0455395	0.0109596	0.0324897	0.026491	0.0121246	-0.0210296	0.0269919	0.064267
MONNIER_POSTRADIATION_TUMOR_ESCAPE_DN	-0.0233026	-0.00057548	-0.0553459	0.111997	0.0797315	-0.0221062	0.020236	0.0636922
RASHI_RESPONSE_TO_IONIZING_RADIATION_5	0.0277453	-0.0394267	0.0131991	0.0865917	-0.0334535	0.0609384	-0.029212	0.0630995
REACTOME_LEISHMANIA_INFECTION	-0.0150411	0.0226335	-0.0342695	0.0326554	0.037205	-0.0272587	0.0121738	0.0630658
PID_P38_MKK3_6PATHWAY	-0.0103319	0.0042998	-0.0457491	0.0598256	0.0263616	-0.0114871	0.0466132	0.062282
PID_FRA_PATHWAY	0.0137946	-0.00199309	-0.101957	0.16642	0.107849	0.00559983	0.0575815	0.0612676
FOSTER_TOLERANT_MACROPHAGE_DN	-0.0550685	0.00385581	-0.046797	0.101566	0.108259	-0.0494205	0.0230458	0.0604575
PID_IL27_PATHWAY	-0.318071	0.0730705	-0.191107	0.309984	0.363936	-0.313109	0.075664	0.0603308
BAKKER_FOXO3_TARGETS_DN	0.0514941	-0.0112016	-0.00878198	0.0132272	0.0377171	0.0490537	-0.0214058	0.0601344
BIOCARTA_EGF_PATHWAY	-0.0840027	0.0324893	0.00592568	0.06238	0.0814314	-0.0660759	0.0459461	0.0599017
BIOCARTA_GLEEVEC_PATHWAY	-0.0478964	0.039663	-0.0510779	0.0886553	0.0137165	-0.050377	0.0723152	0.0587256
REACTOME_A_TETRASACCHARIDE_LINKER_SEQUENCE_IS_REQUIRED_FOR_GAG_SYNTHESIS	0.120961	0.0623128	-0.312345	0.0188045	0.288071	-0.0252689	-0.0809557	0.0585801
VECCHI_GASTRIC_CANCER_EARLY_DN	0.0222465	-0.0878341	-0.204568	-0.0318206	0.0761777	-0.0109266	0.00126462	0.0581734
MIDORIKAWA_AMPLIFIED_IN_LIVER_CANCER	0.0402166	-0.0269822	0.0399003	0.0105109	-0.0170199	0.0687897	-0.0161009	0.0579734
WP_PHOTODYNAMIC_THERAPYINDUCED_UNFOLDED_PROTEIN_RESPONSE	0.00292809	0.00664496	-0.0847587	0.00429422	0.0238152	-0.0210532	0.0344839	0.057303
LEE_LIVER_CANCER_MYC_E2F1_DN	0.154643	-0.191012	-0.194666	-0.959321	-0.548554	0.165725	-0.147759	0.0566741
GNATENKO_PLATELET_SIGNATURE	-0.00336721	0.0211623	-0.0368879	0.026318	0.0353284	-0.0173084	0.0243214	0.0565679
GAVIN_FOXP3_TARGETS_CLUSTER_P7	-0.0596281	0.0128949	-0.109722	0.0642778	0.133404	-0.0819349	0.0295521	0.0565466
SHEDDEN_LUNG_CANCER_GOOD_SURVIVAL_A5	0.0672325	-0.11796	0.135247	-0.0729903	-0.334896	0.20056	-0.0722604	0.0565153
CHIARADONNA_NEOPLASTIC_TRANSFORMATION_KRAS_DN	-0.0455117	0.00244336	-0.039162	0.124369	0.0479113	-0.0363053	0.0128969	0.0563409
WP_NUCLEAR_RECEPTORS_METAPATHWAY	-0.0473012	-0.0130191	-0.0118423	0.056011	0.0635573	-0.0246784	0.0560074	0.0555769
KRIEG_KDM3A_TARGETS_NOT_HYPOXIA	0.00326303	-0.0144804	0.00501685	0.0187618	-0.0215615	0.0181591	0.0136333	0.0555393
WP_CELL_CYCLE	-0.0222309	0.0493535	0.00340285	0.0278698	-0.0128263	-0.0252402	0.0339183	0.0554078
JOHANSSON_BRAIN_CANCER_EARLY_VS_LATE_DN	0.0185067	0.0253941	-0.150183	0.0850246	0.0626771	-0.0290001	0.036144	0.0547527
REACTOME_PURINERGIC_SIGNALING_IN_LEISHMANIASIS_INFECTION	0.00369281	0.00834608	-0.128203	0.108683	0.0180293	-0.0319019	-0.0229229	0.0530501
FAELT_B_CLL_WITH_VH_REARRANGEMENTS_UP	0.00436827	0.019645	-0.0845644	0.0472604	0.0568848	-0.0257673	0.0124474	0.0528913
BIOCARTA_CTCF_PATHWAY	-0.187163	0.0133324	0.0143384	0.0806787	0.0430123	-0.138568	0.0359146	0.0524247
LEE_AGING_MUSCLE_DN	-0.0245711	0.0377251	0.0190461	0.0341953	0.0125073	-0.0208602	0.0194789	0.0522314
YAGI_AML_WITH_INV_16_TRANSLOCATION	-0.0178578	0.0032108	-0.0216955	-0.00331513	0.0428199	-0.0213103	0.0187513	0.0522184
DELASERNA_MYOD_TARGETS_DN	-0.0513183	0.0435585	-0.0594611	0.121288	0.0484145	-0.0625037	0.0343723	0.0517725
BIOCARTA_ALK_PATHWAY	-0.168867	-0.0286679	-0.0239185	-0.0419824	0.179506	-0.127683	0.0876645	0.0510213
IWANAGA_E2F1_TARGETS_INDUCED_BY_SERUM	0.0219069	0.064409	0.0873063	0.197837	-0.00190974	0.0445275	-0.0982605	0.0508039
BARIS_THYROID_CANCER_DN	0.0100135	-0.0168703	-0.0354186	0.00880762	0.0544464	0.00749023	0.0226235	0.0506111
YAO_TEMPORAL_RESPONSE_TO_PROGESTERONE_CLUSTER_5	-0.0933039	-0.0284376	-0.0703719	0.205003	0.0726163	-0.0630797	0.0432649	0.0504003
GENTILE_UV_RESPONSE_CLUSTER_D2	-0.0684011	0.0408349	-0.178482	0.185108	0.139034	-0.112838	0.0280541	0.0502878
LEE_RECENT_THYMIC_EMIGRANT	-0.0315165	0.00332328	0.00271979	0.0616886	0.0364071	-0.0194499	0.0065945	0.0501807
PUJANA_BREAST_CANCER_WITH_BRCA1_MUTATED_UP	0.0420307	0.0282134	0.103741	0.107286	0.0981316	0.0703732	-0.0517386	0.0499608
KEGG_VIBRIO_CHOLERAE_INFECTION	-0.0119633	-0.00507242	-0.0191402	0.00666628	-0.00787381	-0.0081815	0.0298559	0.0493004
RADAEVA_RESPONSE_TO_IFNA1_UP	-0.0527682	0.011324	0.0443847	0.120642	0.0450546	-0.0183323	0.00297461	0.0492016
RUTELLA_RESPONSE_TO_CSF2RB_AND_IL4_DN	-0.0316733	0.0113698	-0.0499453	0.114531	0.0407893	-0.0354373	0.00444014	0.0491052
LINDGREN_BLADDER_CANCER_CLUSTER_2A_DN	-0.0329572	-0.00571548	-0.0606728	0.0344093	0.0778042	-0.0408914	0.0235109	0.0478495
TIEN_INTESTINE_PROBIOTICS_2HR_DN	-0.0339965	-0.00421355	-0.151077	-0.0531604	0.00866172	-0.0850734	-0.0317824	0.0476676
LEE_TARGETS_OF_PTCH1_AND_SUFU_DN	0.0515379	0.129694	0.193669	-0.499725	-0.600311	0.0704722	-0.424728	0.0472595
ZHANG_TARGETS_OF_EWSR1_FLI1_FUSION	-0.0533191	-0.0113478	-0.0501377	0.0745347	0.0897882	-0.0468619	0.0386556	0.0456679
BLANCO_MELO_COVID19_SARS_COV_2_INFECTION_A594_ACE2_EXPRESSING_CELLS_DN	0.0180789	0.00446687	-0.0451058	0.0151944	0.00599036	0.0048626	0.0265763	0.0451263
PECE_MAMMARY_STEM_CELL_DN	-0.00549515	0.0111185	-0.0346629	0.0373353	0.0355099	-0.0186911	-0.00708152	0.0444169
KEGG_FC_GAMMA_R_MEDIATED_PHAGOCYTOSIS	-0.0346276	0.00696484	0.0194941	-0.0979503	-0.0321104	-0.023093	0.0118163	0.044311
MCBRYAN_PUBERTAL_TGFB1_TARGETS_UP	-0.000350875	0.0177436	-0.078387	0.086127	0.0588882	-0.0200704	0.0472219	0.0440139
REACTOME_TRANSCRIPTIONAL_REGULATION_BY_MECP2	-0.11601	0.00657613	-0.0409539	-0.0178346	0.12139	-0.108789	0.0580208	0.0430546
MCLACHLAN_DENTAL_CARIES_DN	-0.0437974	0.010814	-0.0492762	-0.0101975	0.0300437	-0.0539686	0.0355625	0.0428793
KUNINGER_IGF1_VS_PDGFB_TARGETS_DN	0.192313	-0.120418	-0.188298	0.0419584	-0.0178866	0.171526	-0.00406981	0.0428486
WP_OXIDATION_BY_CYTOCHROME_P450	0.348492	-0.277396	0.057843	-1.41664	-0.29339	0.43409	-0.141307	0.0428062
WP_MAPK_SIGNALING_PATHWAY	-0.0395658	0.0230628	-0.0624164	0.0403711	0.044497	-0.0540269	0.0490766	0.0422596
DESERT_PERIVENOUS_HEPATOCELLULAR_CARCINOMA_SUBCLASS_UP	-0.00989646	0.00538015	-0.0502427	0.0304591	0.0482253	-0.0252339	0.00551236	0.0414111
REACTOME_MITOTIC_SPINDLE_CHECKPOINT	0.0323902	0.0309482	0.00555619	-0.0266034	-0.0187383	0.0188859	-0.0175547	0.0411969
WP_TGFBETA_RECEPTOR_SIGNALING	-0.0673089	0.00220775	-0.171436	0.119855	0.175885	-0.100204	0.0750498	0.0402122
REACTOME_PIWI_INTERACTING_RNA_PIRNA_BIOGENESIS	-0.0629468	0.0589243	-0.0705421	0.156763	0.0183296	-0.0733238	0.0808402	0.0391835
TSAI_RESPONSE_TO_RADIATION_THERAPY	-0.0643368	-0.000445314	-0.0182331	0.114794	0.0238915	-0.0500448	-0.0104186	0.0389545
REACTOME_ABORTIVE_ELONGATION_OF_HIV_1_TRANSCRIPT_IN_THE_ABSENCE_OF_TAT	-0.00151411	0.0607237	-0.072909	0.0847109	0.0558016	-0.0349742	0.0606756	0.0388295
JOHANSSON_GLIOMAGENESIS_BY_PDGFB_UP	0.00214538	0.0129984	-0.0121011	0.0443563	0.0425876	-0.00401328	0.00296217	0.0377197
HELLER_HDAC_TARGETS_UP	-0.0417597	0.01604	-0.0373759	0.0751467	0.0282018	-0.047592	0.00256317	0.0376816
WANG_ESOPHAGUS_CANCER_VS_NORMAL_UP	-0.00472125	0.0251564	-0.0951145	0.0619403	0.0764425	-0.0346108	0.0610161	0.037659
PID_IFNG_PATHWAY	-0.0919991	0.0753408	-0.210175	0.20525	0.258902	-0.154756	0.108556	0.0373069
HILLION_HMGA1B_TARGETS	0.0220901	-0.00102955	-0.0231109	0.0100317	0.0275631	0.0137872	0.0110943	0.0371546
BAE_BRCA1_TARGETS_DN	0.00518367	0.0443243	-0.133205	0.0525483	0.0757616	-0.0460865	0.0685798	0.0370081
HORTON_SREBF_TARGETS	0.685834	-0.0746779	-0.0790143	-2.1535	-0.372362	0.558242	-0.309893	0.0369711
WANG_CISPLATIN_RESPONSE_AND_XPC_UP	0.083576	-0.0248785	-0.0242932	0.062421	-0.0165638	0.0837003	-0.0261997	0.0367932
ONDER_CDH1_TARGETS_2_UP	-0.0407847	0.0226631	-0.144696	0.118486	0.121438	-0.0791731	0.0539794	0.0366533
REACTOME_SIGNALING_BY_NOTCH1	-0.0654134	-0.0146405	-0.0335459	0.0221265	0.00603921	-0.0538766	0.0356754	0.0365512
DACOSTA_UV_RESPONSE_VIA_ERCC3_UP	-0.0411026	0.0203958	0.00501952	0.0674023	0.0560911	-0.0337297	0.0170213	0.0364513
KEGG_AMINOACYL_TRNA_BIOSYNTHESIS	0.162749	-0.119607	0.0977061	-0.153659	-0.122834	0.229917	-0.129218	0.0360786
LEE_METASTASIS_AND_ALTERNATIVE_SPLICING_UP	0.0381771	0.00828132	-0.0990104	0.112878	0.0760941	-0.00324826	-0.0699495	0.0360723
KEGG_HEMATOPOIETIC_CELL_LINEAGE	0.0737746	-0.0408008	-0.0207859	-0.066598	0.149002	0.0683583	-0.00616012	0.0341654
MOREIRA_RESPONSE_TO_TSA_UP	-0.0152704	0.00015351	-0.0127799	0.032426	0.0339485	-0.011004	0.0336966	0.0339613
REACTOME_ARACHIDONIC_ACID_METABOLISM	-0.0313383	0.0310649	-0.0267878	-0.0218948	0.130105	-0.0431914	0.0691948	0.0339113
PEREZ_TP53_AND_TP63_TARGETS	-0.140837	0.0248817	-0.102363	-0.158114	0.0908239	-0.174257	0.0254178	0.0333337
ROZANOV_MMP14_TARGETS_DN	0.00207332	-0.0321831	-0.129638	0.251376	0.000712085	-0.00275024	0.00397392	0.0328246
[truncated: 1,753 more rows]

## Sheet: Gene_correlation
# Values are mean log fold change in gene expression (clone compared to bulk tumour) across all vehicle experiments
	Clone 238	Clone 350	Clone 473	Clone 523	Clone 537	Clone 679	Clone 684	Correlation
logFC_abundance_DTX_vs_Vehicle	-3.95824	0.050305	-2.39211	-1.42665	-1.01414	1.91295	-1.60586
Clock	-0.0527267	0.0213022	-0.0136497	-0.0140762	-0.00418357	0.0378944	-0.0046334	0.972398
Rpl23	-0.0799734	0.0271469	-0.0677895	0.00656518	0.0229304	0.138385	-0.0128123	0.963622
Sf3b6	-0.162867	0.0377963	-0.0451441	-0.0203568	-0.0486399	0.168936	-0.00670157	0.963622
Orai2	-0.00477033	0.00832666	-0.00382461	0.0020469	0.00167936	0.0112319	-0.0015941	0.951528
Tmem251	-0.0576935	0.0146888	-0.0565916	-0.033039	0.00239364	0.0658007	-0.0355127	0.949879
Pim2	-0.0184496	0.00628431	-0.00698454	-0.000582397	0.0132328	0.0291173	-0.0054511	0.945754
Nbn	-0.0355677	0.00772292	-0.0141442	0.00874627	-0.00424844	0.0334499	-0.0165692	0.944766
Mtcl1	-0.0506952	0.030909	-0.0423952	0.0339372	0.0240963	0.0999882	-0.00956305	0.94211
Cdon	-0.0651799	0.029913	-0.0367823	-0.0304698	-0.00509991	0.149933	-0.00815042	0.941947
Wdr91	-0.0144698	0.00481855	-0.00444132	0.00214346	-0.00428137	0.0134733	0.00132525	0.941705
Pebp1	-0.0887446	0.0194573	-0.057597	-0.00268448	0.000617968	0.171653	0.0239561	0.94124
Glul	-0.0645673	0.0284232	-0.0537343	-0.0303066	0.00410258	0.0364436	-0.0203673	0.939804
Cox5b	-0.0858564	0.0786243	-0.0603796	-0.0251828	-0.0424183	0.125448	-0.0295003	0.938627
Nmt2	-0.0595844	0.0021927	-0.0212139	0.00332541	0.00562865	0.0632024	0.0128103	0.936391
Elk1	-0.0266282	0.00336031	-0.00430818	-0.012241	-0.00466672	0.0336639	-0.00366801	0.935691
Elob	-0.199029	0.057857	-0.0369784	0.0377466	0.0564028	0.159076	0.0332684	0.934658
Ppif	-0.0425466	0.0085836	-0.0211937	0.0165236	0.00497796	0.077386	-0.0199807	0.932895
Xxylt1	-0.0166413	0.00749236	-0.00590944	0.00550635	-0.00334423	0.0379353	-0.00669172	0.931605
Map2k1	-0.0816231	0.00113871	-0.0178099	-0.0305445	0.00791669	0.064088	-0.0442013	0.93097
Dll1	-0.0352346	0.00884199	2.36297e-05	-0.0148257	-0.00404226	0.0323447	-0.00731648	0.928341
Casc3	-0.0489261	0.0231604	-0.0078426	-0.0063412	-0.0248783	0.0524016	-0.0115715	0.928268
Tbrg4	-0.0140373	0.00602188	-0.000458283	0.000171893	-0.000177188	0.0367573	-0.00117245	0.927534
Lgals3bp	-0.0776532	0.0204087	-0.0101739	-0.00913449	-0.0236293	0.0554932	0.00386137	0.92574
Tmem201	-0.0464543	-0.00156672	-0.0220166	-0.0178093	0.0152273	0.0779905	-0.00809022	0.925525
Trip6	-0.0811372	0.00274616	-0.0300417	0.011336	0.0397896	0.11729	0.0158662	0.924557
Hcfc1r1	-0.154379	-0.0177041	-0.0873558	-0.0460289	0.0492744	0.20718	-0.0713974	0.923829
Ifngr1	-0.0755791	0.0622436	-0.00601821	0.00160499	0.0138407	0.0545867	-0.00763574	0.922231
Ttc28	-0.0429947	-0.00169973	-0.0255995	-0.0151899	0.00451724	0.0842179	-0.018979	0.921163
Bdnf	-0.184945	0.0412595	-0.0556699	-0.0856338	0.014849	0.0994868	0.00622844	0.920191
P3h1	-0.0216591	0.00490666	-0.0238393	0.00417608	0.00799555	0.0571528	-0.00323413	0.919868
Cdk2ap1	-0.124091	0.0269493	-0.00578428	-0.0468171	-0.0445988	0.124176	-0.0203072	0.919532
Ogfod3	-0.0402818	0.00747421	-0.0439797	-0.00742454	0.000227453	0.0395906	0.0049704	0.9192
Prdx4	-0.173591	0.00511466	-0.0170887	0.0052591	-0.0481385	0.136772	-0.0335748	0.918437
Dis3	-0.0563936	0.0423471	-0.0676032	-0.0246426	0.00809126	0.20539	-0.00116641	0.917007
Rpl39	-0.127989	0.003894	-0.0338435	-0.0635756	0.0477998	0.14308	-0.024368	0.916986
Psen1	-0.0309844	0.0103095	-0.0249574	-0.0273268	0.00991263	0.0499161	-0.00647634	0.916572
Jdp2	-0.0422349	0.016878	-0.0314861	-0.00968451	-0.0294103	0.040337	-0.00292423	0.916078
Stam2	-0.0615912	0.0177634	-0.0238744	0.0111333	-0.0336115	0.071016	-0.0300319	0.914084
Dhx15	-0.0882642	0.0448286	-0.0170618	0.0406692	-0.0213839	0.153072	-0.0513575	0.913559
Ppard	-0.0468013	-0.00956009	-0.0347017	-0.003742	0.000341222	0.0536276	0.00395658	0.909871
Bcl9	-0.0538376	0.0187817	-0.0169024	0.00324189	0.00499667	0.151037	-0.0368206	0.909773
Arl4a	-0.172824	-0.0250743	-0.164154	0.0257796	-0.0165008	0.258493	-0.0388688	0.909277
Alkbh4	-0.0112556	0.000871306	-0.000201024	0.00422422	0.00739796	0.021332	0.000370635	0.907534
Rcbtb1	-0.0261158	0.0281747	-0.0354856	-0.0183104	0.0220828	0.0641964	0.00739768	0.905314
Serpine2	-0.31149	0.230481	-0.204564	-0.189442	0.0619678	0.579466	-0.345847	0.90529
Clcf1	-0.10545	0.00280909	-0.0397828	-0.0411097	0.029306	0.087131	0.0185078	0.905095
Fmc1	-0.0811839	0.0599895	-0.0328803	0.0315617	-0.0393796	0.25207	-0.0354801	0.904143
Matn2	-0.0899406	0.0445703	-0.0818812	-0.0514973	0.00536061	0.0578024	0.001449	0.904102
Taok3	-0.0259088	0.00103615	-0.00202855	-0.0110457	0.00449051	0.0200678	-0.0112505	0.903735
Tpp1	-0.037811	0.00665601	-0.0323103	-0.00122781	-0.0132688	0.0127003	-0.00607697	0.903646
Pter	-0.0518246	0.0183722	-0.0256886	-0.0150634	-0.0306938	0.045928	0.00776674	0.903564
Mdn1	-0.0515683	0.00318641	-0.00134211	-0.0100535	0.00338809	0.0306689	-0.0225964	0.901434
Rbm38	-0.0680543	0.0113391	-0.00608396	0.00606092	0.0212475	0.0407216	-0.00953046	0.900919
Pcbp2	-0.121161	0.00348271	-0.0798353	-0.0316712	0.0777111	0.129404	-0.0183753	0.90075
Twist1	-0.307344	0.0141738	-0.246652	0.159397	-0.00611709	0.443425	-0.11811	0.900058
Zfp729a	-0.0230848	-0.000313504	-0.00209686	0.00243025	-0.00422485	0.0430837	-0.00486356	0.899119
Mtfmt	-0.0313445	0.000551023	0.00187043	-0.00920001	0.00184093	0.0420374	-0.0134569	0.898917
Nt5c3b	-0.152296	0.0328112	0.0108428	0.0490984	0.0214241	0.1342	0.0209014	0.897725
Tmem237	-0.0798403	0.0440679	0.00141213	0.00955568	0.00871751	0.0458422	-0.0161391	0.896118
Nup214	-0.0500979	0.0496715	-0.0269693	0.0430803	0.00862391	0.133893	-0.0518793	0.895979
Spata7	-0.284457	0.144736	-0.442613	-0.0655299	-0.115122	0.488542	0.0213904	0.895824
Bloc1s4	-0.0788821	0.0114082	0.00894375	-0.017992	0.00874016	0.0573315	-0.00634823	0.89472
F8a	-0.00972093	0.000867771	-0.00251795	-0.00111207	0.00278855	0.0284091	-0.0041412	0.894169
Cxxc5	-0.0170592	0.00145542	-0.00693822	-0.00857916	0.012544	0.0331425	-0.00665647	0.894036
Zyx	-0.167462	0.0124468	-0.182784	-0.0982959	0.104091	0.349951	-0.0833046	0.893745
Prmt5	-0.0341133	0.0197701	-0.0258854	-0.0364795	-0.016643	0.0590124	-0.0231146	0.893222
Ppp1r12c	-0.038566	-0.00336993	-0.0281047	0.0149099	-0.0104975	0.0637696	-0.00836437	0.892779
Rhog	-0.0719387	0.0326806	-0.0287569	0.00797316	0.0492193	0.0715117	0.0360627	0.892725
Dlg4	-0.0798987	0.00148937	-0.0750371	-0.021953	0.0537023	0.127278	0.010597	0.891347
Osr1	-0.0218872	0.00542441	-0.0082314	-0.011488	-0.00295932	0.0145937	0.00576923	0.891232
Ripk2	-0.0462782	0.00271345	-0.00327566	-0.00515693	-0.0179745	0.0290132	-0.00300457	0.890512
Pnpo	-0.00990325	-3.92234e-05	-0.00419802	-0.00327362	0.000103924	0.0232468	0.00337333	0.890083
Tomm7	-0.07558	0.0299589	0.00537136	-0.0251498	0.0251997	0.2324	-0.0413479	0.889935
Stard7	-0.0193127	0.0125205	-0.0187063	-0.00107517	0.00332134	0.0188257	0.0092407	0.889852
Itpkc	-0.0572662	0.0308714	0.0115589	0.0377588	0.00120782	0.0796262	-0.0171693	0.889809
Wdr74	-0.0385338	0.00622642	0.00428056	0.00514669	0.0090826	0.0313262	0.00521886	0.889696
Churc1	-0.0964624	0.0306356	-0.03223	-0.0294556	0.0482985	0.0813837	-0.0685752	0.889121
Brca1	-0.0304881	0.0139793	0.0123448	0.00201754	-0.00108832	0.0409932	-0.00876068	0.888314
Dtd2	-0.0625279	0.0275499	-0.0540003	-0.0206734	-0.0583147	0.135666	-0.0332034	0.88813
Odc1	-0.187192	0.0505491	0.0431632	-0.0744162	0.103664	0.281294	0.0080074	0.887864
Map2k3os	-0.041615	0.00455937	-0.0106004	0.00728034	0.00305108	0.0192368	0.00165301	0.887154
Plbd2	-0.069309	-0.000163275	0.00214509	-0.000770625	-0.0113379	0.0696839	-0.0370101	0.885974
Tmem243	-0.0936326	-0.014411	-0.00444016	-0.0254999	0.0297579	0.123004	-0.0117644	0.885595
Spata6	-0.0329411	0.026439	-0.0381691	-0.0115095	-0.0255632	0.050315	0.00334111	0.885456
Klhdc2	-0.0898919	0.0847683	-0.0897576	-0.0153286	0.0300593	0.0746349	-0.056281	0.885252
Ldhb	-0.0699297	0.022014	-0.0716629	0.0347995	0.0405836	0.20295	-0.0671703	0.885229
Zwilch	-0.0446499	0.00824776	-0.00935159	-0.0111843	-0.0226834	0.088681	-0.0320154	0.884813
Rap2a	-0.0484063	0.00281256	-0.0342126	0.0350308	-0.000593654	0.0948546	-0.0165824	0.884433
Selenom	-0.0930539	0.057756	-0.157797	0.0324782	-0.0438198	0.244059	-0.0591537	0.884217
Akap8	-0.0502179	-0.00768356	-0.0102033	-0.0143442	0.0169552	0.0482631	0.0028789	0.883315
Ghr	-0.107666	-0.0279169	-0.0466719	-0.0554034	-0.0335082	0.0968335	0.00711276	0.882523
Rictor	-0.0603672	0.0286654	-0.100686	0.00737623	-0.0391274	0.152198	-0.0219874	0.88192
Rps10	-0.260451	0.00013527	0.0131555	0.0163231	0.00277523	0.180817	-0.0129878	0.881814
Armc1	-0.0489725	-0.00919643	-0.0346798	-0.00329898	0.0302371	0.0719846	-0.0224712	0.88114
Ddhd1	-0.0258509	-0.00186919	-0.0125706	-0.0130964	0.0184705	0.0424892	-0.00485224	0.880312
Mrpl28	-0.212147	0.0424856	-0.0247305	0.0291895	0.0276724	0.0891042	-0.0144088	0.8803
Tmem256	-0.100383	0.0807201	-0.0269767	-0.0406881	-0.00121026	0.0503573	-0.0284851	0.879539
Nsd2	-0.0986732	0.0228354	0.00488539	-0.0555797	-0.0368209	0.152763	-0.048827	0.878642
Plscr4	-0.020138	0.0191541	-0.0213056	-0.0191075	-0.0171551	0.0411361	-0.0126152	0.878295
Map3k12	-0.0202052	-0.0045745	-0.0141968	-0.00395593	0.0119096	0.0475223	-0.00668144	0.878123
Rgmb	-0.0893184	-0.00609128	-0.0108942	0.031831	-0.0170132	0.0950946	-0.0159727	0.877299
Timm10	-0.0154867	0.0162596	-0.0176219	0.00757117	-0.0118177	0.02807	-0.0043524	0.876351
Dhx40	-0.0628656	0.0234596	0.0107688	0.0282322	0.0181025	0.0726794	-0.0316374	0.875859
Extl2	-0.0414401	-0.00588043	-0.0160351	0.0155029	-0.00532155	0.0403554	-0.0190924	0.875416
Bnip2	-0.0688293	0.0036948	-0.000947431	-0.00829667	0.00861866	0.0814733	-0.0549166	0.875327
Cpeb4	-0.0212807	0.00538508	-0.0282607	-0.0176687	-0.0176144	0.0492915	-0.00926187	0.875036
4930579G24Rik	-0.0115381	0.000786873	-0.004527	-0.00662023	-0.000424993	0.0327678	0.00309427	0.874741
Nbas	-0.0178062	0.00451377	-0.00571512	0.00118041	0.0178641	0.0290055	-0.0118107	0.873707
Morf4l2	-0.0764448	-0.0033272	-0.0910599	0.0455181	0.00960348	0.182595	-0.00448666	0.873539
Trappc6b	-0.0617061	0.0184098	-0.0765137	-0.0408338	0.01435	0.248885	-0.0529967	0.873268
Atf4	-0.120515	-0.00531815	-0.111505	0.0211871	-0.0255201	0.116959	0.0266324	0.872963
Wdr43	-0.0649391	0.0198016	-0.0281867	0.0038149	0.0386273	0.250468	-0.0662204	0.87257
Denr	-0.0985011	0.0443958	-0.0423372	-0.0387236	-0.0154124	0.02339	-0.0683534	0.871821
Rhob	-0.296011	0.0031381	-0.0462135	-0.0152222	-0.1917	0.361651	-0.0361537	0.871801
Riox1	-0.0202518	0.0218233	-0.0104037	-0.0110219	-0.0140075	0.0341365	-0.0198974	0.871636
Tpcn1	-0.0730374	0.005163	-0.0545178	-0.072531	0.0150181	0.192287	0.00222585	0.871577
Lrig3	-0.0211763	0.0102753	-0.0208402	-0.00836746	0.000727692	0.0208051	0.0111953	0.870936
Espl1	-0.0303043	-0.00264233	-0.0285933	-0.0156997	-0.00843474	-0.00588396	-0.0169984	0.8706
Sipa1l1	-0.073791	-0.0177729	-0.0351219	-0.0292289	-0.04191	0.122099	-0.0535869	0.869926
Api5	-0.0509247	0.0393109	-0.0132681	0.0144318	0.0204699	0.0351097	-0.0269688	0.869715
Twistnb	-0.0668318	-0.00809342	-0.0435199	-0.0435131	-0.0401163	0.122317	-0.0637752	0.868106
Plagl2	-0.0158845	0.00231772	0.00100569	-0.00705776	-0.0056761	0.0108265	-0.00674899	0.867674
Slc1a4	-0.0265451	-0.00491784	-0.00945134	-0.0229477	0.00267141	0.0337714	-0.0055357	0.867346
Tbkbp1	-0.0125937	0.0116353	-0.0179022	-0.000196066	-0.0075209	0.0198341	0.0044435	0.866223
Ccdc88a	-0.107679	0.0713413	-0.0875879	0.0275734	-0.0807785	0.100374	-0.0374412	0.865358
Atp5j2	-0.04569	0.0557889	-0.0615052	-0.00970377	0.0524417	0.0715732	0.0111415	0.863964
Igfbp4	-0.228334	-0.0167165	-0.138712	-0.170041	0.0698269	0.258749	0.0457665	0.862978
Tmem115	-0.0453249	-0.00477464	0.00544227	-0.00803374	0.0144458	0.0537725	-0.0165848	0.862844
Gm8186	-0.0942251	0.000313611	-0.00548201	-0.0525394	-0.0075306	0.254303	-0.0082376	0.862178
Frmd6	-0.0730004	0.01697	-0.0659927	0.0578095	-0.0194985	0.115298	0.00906626	0.862132
Dnph1	-0.0569241	0.0221098	-0.00624261	-0.0256386	-0.0261281	0.14436	-0.0551614	0.86169
Il11	-0.31544	-0.0574216	-0.185507	-0.232493	0.167206	0.569421	0.000709916	0.861034
Apex1	-0.0436533	0.0747991	-0.116731	0.00255701	-0.0264077	0.156315	-0.00832505	0.860872
Zfp580	-0.0170174	0.00286548	-0.012876	-0.00442863	0.0151531	0.0734037	-0.0161917	0.859999
Tipin	-0.0745864	0.0095025	-0.00557774	-0.0118085	0.0169902	0.19987	-0.07652	0.859792
Nr4a3	-0.0365659	0.0296458	-0.0439852	-0.0150311	-0.00455042	0.0195643	-0.00808591	0.85952
Tpst1	-0.0363206	0.00506222	0.00770946	-0.0127648	0.00407282	0.108185	-0.016734	0.858757
Max	-0.054409	-0.00100384	-0.0948578	-0.0130638	-0.0341421	0.0608059	-0.0441797	0.858703
Ttyh2	-0.0200542	0.00543022	-0.0117793	-0.00338778	0.0176687	0.0183709	0.00275942	0.85856
Tnfrsf9	-0.0600378	-0.0308513	-0.0466714	-0.0619576	-0.019749	0.0412118	-0.0440386	0.858513
Pcgf2	-0.0482525	0.00762894	-0.00905942	-0.0324918	0.0232822	0.163972	-0.0356745	0.857906
Ipo5	-0.0497971	0.0121142	-0.0786994	-0.0498513	0.0252944	0.17423	-0.0567166	0.856784
Ing3	-0.0517132	-0.0111998	-0.00505307	0.00687658	0.000708479	0.0412536	-0.0237639	0.856678
Phb	-0.0533469	0.00792951	0.0136601	-0.00347114	0.0172226	0.157277	-0.0372748	0.856554
Fam104a	-0.0818714	0.0319277	-0.00435443	0.113037	0.0137519	0.202315	-0.0128419	0.855636
Romo1	-0.0356605	0.0451963	-0.092721	0.00423329	0.0129643	0.16165	-0.0644451	0.85509
Chaf1a	-0.0509111	0.0520204	-0.00597264	0.00243103	-0.0248086	0.0700157	-0.0483561	0.855006
Gstm2	-0.0366511	0.0165724	-0.0375873	0.00884877	-0.0267292	0.0660302	0.0187999	0.854762
Cebpz	-0.0879529	0.0196615	-0.0271354	0.0611003	-0.0149101	0.0957599	-0.0439657	0.854575
Sms	-0.100938	-0.000456382	0.020758	-0.0367646	-0.0025149	0.134786	0.0170318	0.85437
Ap5s1	-0.0142381	0.00144977	-0.00234193	-0.00433261	-0.00911527	0.0186806	0.00337702	0.854102
Sdhb	-0.109585	0.0113589	0.00915063	-0.0704426	-0.0462366	0.190906	-0.0370266	0.854084
Ttll4	-0.0316582	0.00795156	-0.00201875	0.0344744	0.0261592	0.126731	-0.0229004	0.853898
Fam111a	-0.0533576	0.028186	-0.0131284	0.0169106	-0.00995379	0.0277907	0.00942	0.85388
Pdgfra	-0.0437187	0.0317769	-0.059003	-0.0508137	-0.0332507	0.0630013	-0.0486382	0.853813
Gm47689	-0.014782	-0.00183331	-0.00366089	0.0026906	-0.00739003	0.0129486	-0.000610981	0.853655
Srxn1	-0.039646	0.00332879	-0.0264913	-0.0465865	-0.0214053	0.062858	-0.00437547	0.853308
Cinp	-0.0477028	0.017433	-0.0558865	-0.0258242	-0.0561746	0.134746	-0.0282485	0.852981
Phf19	-0.00942158	0.00693071	-0.0142159	0.00615349	-0.00475093	0.0393466	-0.0131606	0.85258
Nbea	-0.0547605	0.00925922	-0.0311967	0.0168741	-0.0462741	0.0639298	-0.0178677	0.852241
Fads3	-0.0147464	0.016572	-0.00884004	0.0202874	0.0209787	0.0303692	-0.00698254	0.850926
Uqcr10	-0.103748	0.0155519	-0.0359302	0.024393	-0.0643418	0.329447	-0.0709137	0.850392
Lhfp	-0.0603634	0.026445	-0.111803	-0.000639572	0.0727762	0.136179	-0.0220557	0.850312
Bin3	-0.0235376	0.0169148	-0.0411246	-0.0135683	0.0175913	0.0512102	0.0167438	0.849238
Dtx2	-0.0439738	0.00309061	-0.024001	-0.0243245	-0.016269	0.164087	-0.0325884	0.84919
Srrm2	-0.234099	0.0492649	-0.0078426	0.0254629	0.0453525	0.0920197	-0.074183	0.849048
Rpl38	-0.0668678	0.0500744	-0.0888172	-0.115457	-0.0207282	0.215362	-0.0533883	0.848811
Osgin2	-0.0307891	0.0164074	-0.0450973	-0.00945188	-0.0159119	0.0619692	-0.0523327	0.848734
Snx21	-0.0297466	0.0158723	-0.00427483	0.0131022	0.000162217	0.0184449	-0.0153472	0.848522
Ica1	-0.0182012	0.0074712	-0.0229542	-0.012868	-0.00310275	0.0844454	-0.0266892	0.84803
Gpr153	-0.0656736	0.00339529	-0.0272852	0.0453475	-0.00930332	0.0677382	0.000366695	0.847615
Akap8l	-0.0573358	0.00312728	-0.00909963	-0.0135987	0.0185988	0.0250407	-0.0317302	0.847528
Steap1	-0.0649098	-0.0199712	-0.0767535	-0.0226991	0.0297398	0.226515	0.00958031	0.846534
Znhit3	-0.0208559	0.0152007	-0.012532	0.00966219	0.00155477	0.0526451	-0.0345258	0.846445
Ugdh	-0.133146	0.0260758	-0.158811	-0.115781	0.117053	0.214797	-0.00725752	0.846162
Exo1	-0.0177447	0.00619603	-0.00169598	-0.00399386	-0.00996286	0.0748436	-0.0055704	0.845938
Celf2	-0.0821232	0.021685	-0.0595974	0.0661999	0.000348978	0.108179	-0.0625672	0.84541
Egfl7	-0.0284582	0.0133806	-0.0113342	0.0214911	0.00203398	0.0235827	-0.0119202	0.845369
Slc25a51	-0.0338935	-0.00290114	-0.0155701	0.0088084	0.0157008	0.0229628	-0.00197444	0.845191
Mns1	-0.018684	0.00139119	0.00154848	0.00933436	-0.00714667	0.040551	-0.00817196	0.84496
Mrps16	-0.0710082	0.0769761	-0.174882	0.0120423	0.0429048	0.15712	-0.0379495	0.844803
Gm10131	-0.00528446	0.00346701	0.00024138	0.000851578	-0.000678363	0.00683663	-0.00563421	0.844701
Ppig	-0.130291	-0.013612	-0.00246509	-0.00285792	-0.0527457	0.105886	-0.0808818	0.844591
Nfx1	-0.0688757	0.0235421	-0.0313402	0.0205251	0.0580844	0.0724391	-0.0493336	0.844365
Sh3bp1	-0.041062	0.00125031	-0.0369777	0.0032639	0.0427957	0.0563913	-0.0132192	0.844337
Plscr1	-0.0506913	0.0426014	-0.090253	-0.0856547	-0.00217868	0.13745	-0.00468618	0.843971
Dvl2	-0.0509248	0.0043616	0.00816683	0.00145048	-0.00898048	0.0364071	-0.0247939	0.843666
Fos	-0.26693	-0.0415305	-0.127455	0.15787	-0.0167449	0.294404	-0.111268	0.843425
Bgn	-0.0555747	0.0114181	-0.0402558	-0.0422028	-0.0365675	0.202343	-0.0560926	0.84277
Dctpp1	-0.126478	0.108035	0.0245009	0.0141993	-0.0532535	0.14374	-0.0802107	0.842709
C1d	-0.0765659	0.000371328	0.00942942	-0.0216463	0.0520913	0.114633	-0.0411387	0.842702
2007-09-01	-0.080969	-0.0177553	-0.0133308	0.00981055	0.00434448	0.192175	-0.0674923	0.84269
Atp6v1d	-0.068458	-0.0205151	-0.0260267	0.00898646	-0.0176737	0.0343306	-0.00578978	0.841227
Nomo1	-0.0154757	0.0106154	-0.0125036	-0.024086	-0.0105434	0.0409572	-0.010636	0.841111
Wdcp	-0.0223551	-0.00711159	-0.00967996	0.00305094	0.0187877	0.0551843	-0.0117977	0.840942
Slc7a1	-0.0426409	0.00791793	-0.037466	-0.0427289	-0.0195681	0.0488654	0.0126646	0.840141
Alyref	-0.112435	0.0467112	0.0312457	0.0350861	-0.0331101	0.10417	-0.0263201	0.83993
Sympk	-0.0511764	0.0197577	0.00441571	-0.0255743	0.065977	0.122421	-0.0348068	0.839867
U2af2	-0.10304	0.047049	0.0404257	0.0215299	0.0759953	0.097204	0.0172157	0.839343
Ppme1	-0.0849422	-0.0316743	-0.00759005	0.000922358	0.0410792	0.139809	-0.0106592	0.839078
Mrpl12	-0.0235732	0.0385169	0.0328624	0.0139713	0.0188457	0.0758304	-0.018342	0.838246
Dnaja4	-0.0374517	-0.00580386	-0.00870855	-0.0183065	0.00583473	0.0270345	0.00859148	0.837056
Hdac10	-0.00667065	0.00613351	-0.00439817	-0.0100641	-0.00399086	0.0137677	-0.00113091	0.836216
Prmt6	-0.0169407	0.00564803	-0.0141994	0.0152351	-0.00844766	0.0357982	-0.0155315	0.835739
Rasa2	-0.0847569	-0.0223277	-0.064725	-0.0566791	0.00296748	0.0797717	0.0240721	0.835556
Gde1	-0.024053	0.0256144	0.00705322	0.0298416	0.0125547	0.0576461	-0.0252875	0.835406
Gpank1	-0.0719237	0.00324931	-0.0115099	0.0600291	-0.0286096	0.156124	0.0101081	0.835362
Ndufa5	-0.041017	0.0288387	-0.118862	0.0167342	0.0406782	0.175366	-0.0546252	0.835166
Lsm12	-0.0608909	0.00292239	0.0114142	-0.000804547	0.00852819	0.0631553	0.0283691	0.835121
Riok2	-0.0778515	-0.0128345	-0.0248854	-0.0342966	-0.0184929	0.0261661	0.0106646	0.834196
Ston2	-0.0173391	0.00820593	-0.0102091	0.0204078	0.00644132	0.0448819	-0.0211114	0.833226
Cox7a2	-0.0387783	0.0100894	-0.0671395	-0.0536486	0.0432239	0.196545	-0.0344063	0.832928
Anxa11	-0.0523606	0.0216468	-0.110131	0.0050617	-0.020155	0.19542	0.0488009	0.832789
Jmjd6	-0.0945615	-0.00565304	-0.0552612	0.0502479	0.0991876	0.157445	-0.03718	0.832468
Mrfap1	-0.121824	-0.0412215	0.00092888	0.00277893	-0.0302984	0.184246	-0.0449574	0.832125
Abhd6	-0.0103672	0.00591556	-0.0254453	0.0127318	0.0142285	0.0457096	-0.00956524	0.83157
Usp36	-0.0616206	0.0174707	-0.0137273	0.0221422	-0.0396994	0.0469745	-0.0191838	0.831491
Nufip1	-0.0329041	0.00462904	-0.0640406	0.00139501	0.0240869	0.0660793	0.00653355	0.830949
Umad1	-0.0141718	0.0195327	-0.0233913	-0.0118006	-0.0203094	0.0419334	0.000562911	0.830927
Elovl5	-0.0187353	0.00864658	-0.0270329	-0.012832	0.0121888	0.153606	-0.0240826	0.830393
Psip1	-0.0221739	0.0795046	0.00328064	0.0501621	-0.000923573	0.0906157	-0.0221748	0.830048
Lpcat3	-0.0663305	-0.0187443	-0.0162192	0.0273837	-0.0234893	0.128361	-0.0340007	0.829481
Ndufv3	-0.0510981	0.0051732	-0.094988	0.0430177	0.000642852	0.202632	-0.0632505	0.829465
Etfb	-0.071832	-0.00652114	-0.0583345	0.0674774	-0.0038699	0.125264	-0.0227025	0.829359
Ddx56	-0.0748167	-0.0159728	0.00786654	-0.0176362	-0.026146	0.09031	-0.0408781	0.829133
2700016F22Rik	-0.0181991	0.0229849	-0.0192915	-9.51012e-05	-0.00483545	0.0135173	-0.0132513	0.829049
Ccdc85c	-0.0113263	0.0168659	-0.00315045	-0.00513413	-0.0133586	0.0484525	-0.0158773	0.82901
Lrr1	-0.0186695	0.000948065	0.000983183	0.0160263	-0.00650959	0.0487785	-0.00400635	0.829007
Has1	-0.0125003	0.000726829	0.00263189	-0.00676101	0.000854983	0.0107934	-0.00580537	0.828808
Fam173b	-0.0486199	-0.000113777	-0.0765538	0.00413565	-0.0301725	0.0837221	0.0132626	0.828566
Psph	-0.0887758	0.0341805	0.0100342	0.0113076	-0.0467207	0.0645047	-0.0271414	0.827908
Pfas	-0.0307288	0.0106046	0.0060224	-0.00807228	-0.0163423	0.0424637	-0.0261146	0.827298
Ndst2	-0.0156978	0.00414928	-0.0106062	-0.000188866	0.0065583	0.00425892	-0.00722916	0.82644
Polr1e	-0.0339808	-0.00474233	-0.0043252	0.00206804	0.00153143	0.0194602	0.00735773	0.825994
Slc39a7	-0.0430001	0.0178766	-0.0180674	-0.00940625	-0.0529164	0.0762828	-0.00358112	0.825774
Tmx1	-0.0636848	0.0124175	-0.0475664	-0.0277378	-0.0766983	0.210278	-0.0549071	0.825569
Sec23a	-0.0212724	-0.00854977	-0.0322587	-0.0238008	-0.00588513	0.0248981	-0.00555296	0.825557
Polr1c	-0.0848468	-0.007727	-0.00340557	0.0355615	0.022334	0.0971171	-0.0561644	0.824974
Zzz3	-0.0495876	0.00152132	-0.0337448	0.0335927	-0.00924332	0.040947	-0.00926315	0.824199
Appbp2	-0.0478461	0.0202364	0.0055848	0.00157119	0.00401288	0.0330513	-0.0376283	0.823922
Pltp	-0.0286624	0.0185014	-0.0127151	-0.0163647	0.0175881	0.0152507	-0.000920302	0.82342
Crlf3	-0.0416697	0.0134068	0.0101891	-0.015982	-0.0294672	0.150654	-0.0129638	0.823028
Palld	-0.113271	-9.68782e-06	-0.0713873	0.0521296	0.0085619	0.139792	-0.128571	0.822726
Ube2cbp	-0.0150396	-0.00648984	-0.00370932	0.00613192	0.00775773	0.03628	-0.00719373	0.822419
Ppt2	-0.0633852	0.0193527	-0.0241622	-0.058426	0.00217128	0.0371574	0.00905444	0.822175
Rpl36a	-0.0586299	-0.0155215	-0.0702487	-0.0621715	0.0537227	0.236778	-0.0341639	0.822142
Tbcel	-0.0103663	0.00376321	-0.00354783	-0.00309464	-0.00904675	0.00485974	-0.00230582	0.821751
Tulp3	-0.0335941	-0.00724457	0.000347296	0.0144508	0.0317753	0.0760871	-0.0162641	0.821494
1700017B05Rik	-0.0393283	-0.0228743	-0.0212305	-0.0136728	-0.0180835	0.00419538	-0.00975869	0.82091
Ecd	-0.0758128	0.0194548	-0.0471622	-0.0148385	-0.0133187	0.0298075	0.0314348	0.820514
Ggcx	-0.0113346	-0.00443587	-0.0075041	0.00386156	0.0100833	0.026798	0.00510343	0.820449
Gm2a	-0.0686163	0.011521	0.00497615	-0.0481823	-0.0372547	0.236835	-0.047436	0.820053
Pmpcb	-0.0602677	-0.0217577	0.00423249	0.000817582	0.0249799	0.0848514	-0.0045023	0.820004
Ndufc1	-0.0393788	0.0148324	-0.119151	-0.0239655	0.0218954	0.122553	-0.0097239	0.819397
Emg1	-0.129745	0.0633498	-0.0250711	0.025021	-0.018808	0.0318651	-0.0403304	0.818802
Snhg10	-0.0121623	0.00427642	-0.00984209	-0.0175729	0.00234749	0.050455	0.0114068	0.818468
Gclc	-0.0191089	-0.0127488	-0.0190124	-0.0028095	0.00784202	0.0496772	-0.00286984	0.818423
Bzw2	-0.0797657	-0.0412702	-0.0779942	-0.0371169	0.0303456	0.257241	-0.0879217	0.817077
Slc35f5	-0.0482068	-0.00058436	-0.00614481	-0.0316265	0.00295268	0.257236	-0.0269199	0.817031
Snhg6	-0.00997687	0.0257581	-0.0621634	0.00908978	-0.000942468	0.0904361	-0.00641249	0.816737
Nagk	-0.0429139	0.0180897	-0.0215132	0.0247107	-0.0292673	0.0373413	-0.00471363	0.816718
Ube2j2	-0.0935267	-0.045595	-0.0118192	0.020815	0.00611667	0.150545	-0.0308876	0.816423
Atxn7	-0.0320678	-0.022179	-0.0182894	-0.00711322	0.00251713	0.050328	-0.00512253	0.816067
Hat1	-0.0617235	0.0105927	0.0163792	0.0484848	-0.0184561	0.104471	-0.0133916	0.815635
Esco2	-0.0260345	0.0247038	-0.0449881	-0.00263467	-0.0162436	0.0218842	-0.0152258	0.815544
Elf4	-0.0259503	0.00116144	-0.00238241	0.00643488	-0.0129725	0.0149147	-0.0105898	0.815153
Isca2	-0.0928177	-0.0218106	0.0199326	-0.0513739	0.0219741	0.25715	-0.0372914	0.815
Pbdc1	-0.0558634	0.0171547	0.0229041	0.025622	-0.0236816	0.0846763	-0.0196574	0.814205
Ogdh	-0.0409789	0.0218723	-0.000847542	-0.041837	-0.0391063	0.146126	-0.0135133	0.813931
Uqcc2	-0.196516	-0.0270183	0.0172616	0.0239331	-0.0983419	0.1977	-0.0528179	0.813251
Suv39h2	-0.0250933	0.0055971	-0.0450012	-0.00692552	-0.00497534	0.0150865	-0.0271342	0.81308
Bmpr1a	0.00176742	0.0297947	-0.0346295	-0.0126069	0.00586451	0.129644	0.0125806	0.813009
Rgs10	-0.0439277	-0.00800138	-0.00789884	0.0256457	-0.00867994	0.203792	-0.0266687	0.812925
Mum1l1	-0.0127038	-0.00183326	-0.00602836	-0.00985181	-0.0100544	0.0306533	-0.0153733	0.812401
Bptf	-0.123319	-0.0161315	0.0403137	0.0115861	0.0361493	0.139955	-0.0351602	0.81204
Apopt1	-0.0433255	0.0133861	-0.0896501	-0.0438972	0.0459653	0.0905048	-0.0151659	0.81175
Dcaf13	-0.0183222	0.0231988	-0.0265148	0.0434294	0.00976458	0.0660733	-0.019487	0.811742
Zeb2	-0.0440027	0.0538849	-0.130913	-0.00105237	0.08442	0.146828	-0.0374148	0.811727
Psme3	-0.0410544	-0.00791075	0.0123192	-0.0069178	0.010202	0.0958108	-0.0303298	0.81142
D6Wsu163e	-0.0111132	0.000668018	-0.00335779	-0.00428971	0.0127033	0.0136783	-0.00225297	0.81112
Nxt1	-0.0499648	0.0186948	0.00122956	0.00357205	-0.0348608	0.0478288	-0.0377784	0.810912
Med6	-0.00869927	0.00176208	-0.0318621	-0.00446239	0.0248934	0.0986778	0.00344578	0.810532
Agpat4	-0.0491762	0.0304812	-0.0337703	-0.00267948	-0.0451881	0.0301543	-0.00200572	0.809957
Rpl21	-0.0911121	0.0318286	-0.0392567	-0.0966905	0.0584373	0.109476	0.0279993	0.809948
Mrgbp	-0.0603961	-0.0130727	0.018029	-0.00740101	-0.00286683	0.185403	-0.0328708	0.809809
Zfp787	-0.0356747	0.0323203	-0.0210498	-0.00196191	-0.0282732	0.0226006	-0.0260951	0.809471
Ssr4	-0.0476894	0.0211333	-0.0647641	-0.0780135	-0.00484118	0.26212	0.0516643	0.809258
Gm15283	-0.0256035	-0.00185867	-0.0508429	-0.0106926	0.0120541	0.248938	-0.020348	0.809241
Tiparp	-0.149217	-0.0142664	-0.201379	0.106919	0.117274	0.274309	0.0396656	0.809165
1700025G04Rik	-0.0177322	-0.00602983	-0.0362004	-0.00484602	0.0082401	0.0568836	0.00893667	0.808952
Dck	-0.0152591	0.00547479	-0.00628976	-0.0164544	-0.00284562	0.0589521	0.0183661	0.808828
Gm12166	-0.0560824	-0.0227733	-0.00323705	-0.00290915	-0.0232812	0.0486597	-0.0161308	0.807088
Siah1b	-0.0105503	0.00532387	0.00479835	0.00464916	0.0010674	0.0186924	-0.0109986	0.80687
Maoa	-0.0589938	-0.03317	-0.0351412	0.0208326	-0.00969549	0.106019	-0.0425697	0.806412
Ppm1d	-0.0342763	0.0108233	-0.00859754	0.023878	-0.00690197	0.0222416	-0.00800617	0.805805
Dnajc9	-0.00339377	0.0384099	-0.048872	0.0394584	0.0368241	0.0877234	0.000365768	0.805719
Cops6	-0.0906057	-0.008592	0.0359884	0.0554717	-0.00980501	0.182818	0.0142545	0.805556
Ctps2	-0.0674389	-0.00984954	-0.059188	0.0255638	0.0355063	0.0527695	-0.00829027	0.805365
Itga5	-0.0376437	0.0116504	-0.103903	0.0422018	0.0403887	0.144821	0.0186561	0.805094
Clp1	-0.0388311	0.0080205	0.00369892	0.0220902	-0.00891482	0.0307179	-0.00900062	0.805077
Narfl	-0.0258798	0.0174909	-0.00599244	0.00416091	-0.0219572	0.0218194	-0.0172577	0.80503
B930036N10Rik	-0.0540181	0.00529278	-0.0107043	-0.0226332	-0.0579565	0.0776374	-0.00322876	0.804905
Cdk5r1	-0.0166416	-0.000458223	-0.012293	-0.0257219	-0.000854853	0.026495	-0.0013545	0.804852
Nme6	-0.0238244	0.000554153	-0.00967853	0.00141123	-0.00175506	0.010323	-0.0250598	0.804721
Ttc8	-0.0327964	-0.00465099	-0.0547463	0.0206961	-0.0038129	0.049747	-0.0122836	0.804711
Pip4k2a	-0.0222858	-0.00800959	-0.0203454	-0.0102135	-0.0208367	0.0354521	0.00331261	0.804668
Slc46a1	-0.0104063	-0.00332511	-0.00364511	-0.00803148	-0.00436054	0.0261195	0.00321586	0.80458
Clybl	-0.0159366	-0.00701552	-0.0194611	-0.000670282	-0.0148741	0.0569667	-0.00709701	0.804433
Tnfaip2	-0.0527748	0.110729	-0.195433	0.00457026	0.0556044	0.177248	-0.0673161	0.803704
Tspyl2	-0.0147268	0.00660289	-0.00670365	-0.00617682	-0.00168916	-0.000445156	-0.00632388	0.803365
Evi2a	-0.0423429	-0.0230141	-0.0543309	0.00455724	-0.0261877	0.0931874	0.00146398	0.803335
Nampt	-0.063217	0.0191802	-0.0343682	-0.0246698	-0.0175586	0.1237	-0.121229	0.802799
Mcub	-0.0742248	-0.0204857	-0.127369	0.0410665	0.0598643	0.190941	0.0300721	0.802589
Far1	-0.0177134	0.00927256	-0.00450287	0.020564	0.0567878	0.0850098	-0.0143015	0.802306
Vmn1r43	-0.0273212	-0.00122933	0.0022632	-0.00282361	-0.0188061	0.0299231	0.00043018	0.802058
Slc12a9	-0.0118957	-0.00233216	-0.00230763	0.00227984	-0.0105497	0.0285522	-0.00541709	0.802019
Ppp1r8	-0.0389232	-0.017216	-0.00916915	0.00560444	0.0135807	0.0351085	-0.00861812	0.801845
Atp6v0b	-0.0429638	-0.00777072	-0.0321263	-0.007559	-0.0433615	0.146586	-0.0534495	0.801805
Tbc1d7	-0.0372537	0.00312543	0.00596563	0.00910932	-0.025972	0.0478052	-0.00570074	0.801306
Rnaseh1	-0.025862	-0.00456967	-0.0087113	0.00569797	-0.0258649	0.0672275	-0.00832471	0.801293
Cmtm7	-0.034279	-0.00487587	-0.0202847	-0.0290916	0.0574678	0.118319	-0.0197263	0.800626
Cd52	-0.0626343	0.00541397	-0.00330217	-0.0183549	-0.0576802	0.250173	-0.0546814	0.800555
Impa1	-0.0652221	0.0039654	-0.0471671	-0.0131546	-0.0925336	0.253773	-0.01791	0.799719
Rnf113a1	-0.0127225	-0.00308582	-0.00507169	-0.0121656	-0.00568934	0.0333707	-0.0169034	0.799388
Pgm2	-0.0551128	-0.0334067	-0.0951662	-0.0214749	0.05023	0.158857	-0.0314075	0.799337
Tuba1b	-0.0499103	0.0377089	-0.136609	0.0206824	0.0554245	0.132484	0.0296767	0.799143
Hacd1	-0.0936709	-0.00260541	-0.13561	-0.119162	0.0450282	0.140203	0.00948727	0.79873
Pogz	-0.0421473	-0.0153175	-0.0121735	0.0488759	0.0569287	0.180654	-0.0248287	0.798626
Gtf2a2	-0.0539477	0.0308556	-0.0136723	-0.00034402	-0.0151392	0.00826956	-0.0238786	0.798175
Rgcc	-0.0588515	-0.00270202	-0.0977521	0.0262555	-0.0213006	0.066322	-0.0100248	0.798132
Prkd3	-0.0198116	0.00681976	-0.0283679	0.00174421	-0.026978	0.171088	-0.0198653	0.797894
Rpl29	-0.141659	-0.0266728	0.012961	-0.123229	-0.0057954	0.156048	-0.0465507	0.797448
Nf1	-0.0283138	-0.010271	-0.010945	0.0306771	0.00941066	0.0683892	-0.00821433	0.796711
Cdc7	-0.0209595	-0.00416529	0.00445036	0.0180505	0.00768572	0.041154	-0.00599352	0.7967
Rad51ap1	-0.0108065	0.0143362	-0.0114467	-0.0166488	-0.0211939	0.0643326	-0.0114094	0.796224
Zfp954	-0.00847128	0.00565597	-0.00125485	-0.00936284	-0.00612863	0.00981595	-0.00726174	0.795932
Sft2d1	-0.0402273	-0.00066199	0.00695671	-0.00201377	0.00482638	0.0287936	0.0138611	0.795773
Dbt	-0.0120399	0.00203881	-0.000989937	-0.00353196	-0.00174929	0.0101784	-0.0151633	0.795528
Rbm25	-0.14552	0.0777856	-0.0676921	0.0544424	0.0287729	0.0370842	-0.0392565	0.795379
Nr4a2	-0.330784	0.0730978	-0.303124	-0.0124695	0.146206	0.152138	0.100362	0.795327
Eif6	-0.105286	0.0358167	0.031674	0.0541148	-0.0363058	0.114025	-0.0511629	0.795217
Mtmr1	-0.0125626	-0.00464987	0.000105687	-0.00254553	0.0016294	0.0332891	-0.0137029	0.795021
Scarb1	-0.0215165	-0.0138623	-0.0218801	-0.01465	0.0222478	0.097241	-0.0163319	0.794915
Ppp2r5b	-0.0315681	-0.0180216	-0.0221663	-0.0230736	0.00659595	0.0187919	-0.00833069	0.794836
Ncapg2	-0.0404734	0.0394463	-0.048853	-0.0187001	-0.0782231	0.11303	-0.0397867	0.79467
Mbip	-0.0304548	0.0171055	-0.0459089	0.0175234	0.0268979	0.0472003	-0.0388514	0.794519
Pgp	-0.0241299	-0.00362364	-0.0367158	0.0206782	0.0579425	0.110528	-0.0166557	0.794507
Map3k4	-0.0565147	-0.00654782	-0.0231597	0.0438942	0.051042	0.0901424	-0.0346915	0.79416
Usp32	-0.037983	0.00558051	-0.0170782	0.0181366	-0.0212182	0.01997	-0.0157876	0.794133
Susd6	-0.115444	0.042138	-0.0994828	0.103957	-0.0167518	0.107451	-0.075662	0.794096
Nrde2	-0.0402199	0.0121034	-0.0326887	-0.00408807	-0.016012	0.00428247	0.00301362	0.793942
Tcp1	-0.132929	0.018472	0.0174365	-0.0818023	-0.0162465	0.136633	0.0608792	0.793774
Srgn	-0.107372	-0.013157	-0.0811838	-0.0917171	-0.0654958	0.290111	0.0817233	0.793599
Ccdc28a	-0.025551	-0.0104796	-0.021142	-0.0132986	-0.000695818	0.192281	-0.00496423	0.793573
Atg4a	-0.013021	-0.00287558	-0.00420571	0.00924772	0.00403537	0.0143411	0.0018912	0.7935
Clspn	-0.04937	0.0131234	0.0183953	-0.0197973	-0.02773	0.0586685	-0.0258451	0.793488
Gm10269	-0.0067722	-0.000368655	-0.00906049	-0.00456282	-0.0104693	0.0131276	-0.00222449	0.793348
Galt	-0.014115	0.00954424	-0.0227541	0.0108546	-0.000119134	0.0142516	-0.00736531	0.792441
Ckb	0.0019826	0.0208288	-0.0319975	-0.00916417	0.0347315	0.235912	-0.0189813	0.792064
Cbll1	-0.0101676	0.0034256	-0.00926597	-0.0200331	-0.00422926	0.0618022	-0.016547	0.791861
Taz	-0.0306929	0.0255616	0.0225834	-0.0131037	-0.0242704	0.118858	-0.0302136	0.791402
Nmnat3	-0.0136367	-0.000950174	-0.00230587	0.00526016	-0.00277413	0.00600806	-0.002021	0.791218
Nucb2	-0.0808804	0.028783	-0.0634811	-0.0286233	0.0135705	0.0491036	0.0534119	0.790848
Efr3a	-0.144764	0.0403174	-0.0446675	0.0612502	-0.138862	0.15287	-0.0675775	0.790604
Hmga1	-0.231464	-0.0174908	-0.000962077	-0.061514	0.0924088	0.14115	0.0525922	0.789988
Jak1	-0.0746893	-0.00987949	0.0134754	0.0642342	0.0453519	0.123355	-0.0214989	0.789899
Glrx5	-0.0462755	0.02789	-0.0758664	-0.0699994	0.0493124	0.115509	0.0346204	0.789774
Nrp1	-0.0139718	0.0130298	-0.0241454	0.0141187	-0.0101565	0.0318679	-0.0216711	0.78924
Leprot	-0.0108143	0.0146321	-0.0259916	0.00733426	0.0198886	0.0769537	-0.0422309	0.789165
Hadha	-0.0628223	0.00163423	-0.00485922	0.0489327	-0.0395303	0.10656	0.0085822	0.789113
Rpa2	-0.0278511	0.00779158	0.0131738	0.00472088	-0.0226287	0.0864689	-0.0210487	0.78909
Rps21	-0.118786	0.0211808	0.0369492	-0.0509964	-0.0312163	0.0757232	-0.0232682	0.788622
Orai1	-0.0168203	0.0167612	-0.0222433	-0.0395414	0.026904	0.0605261	-0.00757358	0.788589
Cpsf3	-0.044086	-0.0194307	0.00349744	-0.00182209	-0.0201689	0.105772	-0.0175209	0.788402
Mgst2	-0.148213	-0.0893338	-0.129098	0.0821971	0.152248	0.382194	0.00229727	0.788333
Dusp2	-0.171598	-0.0564434	0.00800296	-0.171774	0.0541945	0.398408	-0.01869	0.788178
Asxl2	-0.047432	-0.0168547	-0.00450192	-0.0374329	-0.0224653	0.0601162	-0.0446995	0.788127
Prkaca	-0.0579689	-0.0110129	0.00714097	-0.0174629	0.0802032	0.232191	-0.0657975	0.787859
Sap18	-0.0620036	0.0709732	-0.240419	0.00609739	0.00787779	0.190043	-0.0181853	0.787733
Cdc27	-0.0212942	0.0110285	-0.0441514	0.0046751	-0.00033516	0.0196551	-0.0161199	0.787221
Zfp277	-0.0246428	-0.00068407	-0.0753566	-0.0365691	0.0219058	0.176447	0.0338266	0.787219
Psma6	-0.108789	-0.01285	0.0017321	-0.0462669	-0.108203	0.239115	-0.043017	0.787115
Pole2	-0.00996867	-0.00653153	-0.0117126	-0.00558747	0.00647705	0.0755393	-0.0101631	0.787067
Snapc1	-0.0482373	-0.00943253	-0.104612	0.0396706	0.0371888	0.144559	-0.0565801	0.786946
Ccsap	-0.0179206	0.00298422	-0.00581183	-0.000236611	-0.0218888	0.0415311	-0.0216809	0.786816
Erp44	-0.0333514	0.0283326	-0.042042	0.00490378	0.0131842	0.0262053	-0.0420754	0.786775
Ddah1	-0.0147771	-0.000199384	-0.0372756	-0.0273152	0.0131944	0.144508	-0.0380793	0.786146
Psmd10	-0.0372311	-0.0014793	-0.00809412	0.0709304	0.0115407	0.196356	-0.0390177	0.786116
Dis3l	-0.0148888	-0.0072237	-0.000509131	-0.00156151	-0.000934836	0.043482	0.00877679	0.785949
Rpain	-0.0633742	0.0147575	-0.0190746	0.0827003	0.0152285	0.0849633	-0.00701309	0.785906
2700097O09Rik	-0.0320654	-0.0097756	-0.0114198	0.0326353	-0.0125201	0.0900716	-0.0175439	0.785614
Tmem175	-0.0174106	0.00976365	-0.00887892	0.00990903	-0.0276468	0.0490619	-0.00483418	0.785588
Mrpl47	-0.0242496	0.00424805	-0.00934829	0.0136208	-0.0183551	0.0260218	-0.0195203	0.785525
Gm14296	-0.00924345	0.00342819	0.00539535	-0.00628241	-0.00468887	0.0336841	-0.00951522	0.785494
Mpp5	-0.0259098	-0.0161005	-0.0398947	-0.023558	-0.00106016	0.046778	-0.0430938	0.785463
Camta2	-0.0187502	-0.00277328	-0.000453993	-0.0108471	-0.0173399	0.0242992	-0.00806385	0.785447
Psmc5	-0.0512914	-0.00474187	0.014713	-0.0392234	-0.0212366	0.0897121	-0.00470284	0.78539
Ier3	-0.531906	0.0726138	-0.203354	0.100728	0.121191	0.146004	0.115979	0.785231
Htra1	-0.108021	0.081132	-0.289185	-0.0358632	-0.0416065	0.137536	-0.0658575	0.785165
2310022A10Rik	-0.0129271	0.018375	0.00203558	-0.00274601	0.00276019	0.0191234	-0.0185402	0.78485
Nrg1	-0.0476847	0.0111952	-0.0350195	0.0407246	-0.0551987	0.130883	-0.0513211	0.784795
Ptgr2	-0.0182267	0.027835	-0.0619038	0.00635395	-0.036833	0.0773695	-0.0191234	0.78453
Zfp655	-0.0398602	-0.00352825	-0.00473541	-0.00523079	-0.0357829	0.0333907	-0.00526048	0.784201
Med8	-0.0465517	-0.0034721	0.0213845	-0.011596	0.0245679	0.0684631	-0.0251923	0.784067
Flot1	-0.0498438	-0.0368243	-0.0333383	-0.0354599	-0.0292639	0.105579	-0.00897275	0.783938
Orc1	-0.000537524	0.00197399	-0.00172256	0.00325553	0.00362524	0.0375364	-0.00445565	0.783682
Adk	-0.0253626	0.0492764	-0.102647	0.027947	0.0437103	0.0964238	0.00713965	0.783228
Serf2	-0.0943754	0.0480359	-0.0761222	-0.0256907	0.0573694	0.0634557	0.0618205	0.78271
1810037I17Rik	-0.0670249	0.0125392	-0.0514375	0.101109	0.0530267	0.165606	-0.0726383	0.782666
Det1	-0.00546737	0.00162262	-0.00575646	-0.00516342	0.00581138	0.0067783	-0.00569977	0.782478
AI413582	-0.110323	-0.00439699	0.00735783	0.0334392	-0.043761	0.0750033	-0.00294786	0.782004
2700049A03Rik	-0.0169026	-0.00657286	-0.0165506	0.00530201	-0.0143246	0.0276709	-0.0198235	0.78159
Orc5	-0.0243454	0.004946	0.00756954	-0.000615586	0.00372854	0.0122459	-0.00855522	0.781401
Atp5k	-0.0721289	0.039807	-0.0383334	-0.104639	-0.101592	0.235259	0.00283272	0.781383
Hdac5	-0.0325501	-0.00264745	-0.0450114	0.00890199	-0.00604096	0.0209242	0.00220674	0.780237
Hbb-bs	-0.122834	0.0554504	0.0311766	-0.131697	-0.0888157	0.22006	-0.0174487	0.780116
Selplg	-0.0520542	-0.0200719	-0.0056164	-0.044203	-0.00527814	0.336915	-0.0114449	0.779791
Adam17	-0.0584692	0.0341908	-0.050582	-0.0373953	-0.0398267	0.0202643	0.00835742	0.779759
Lmf1	-0.040476	-0.0261572	-0.0142513	-0.0277987	-0.0227707	0.0523051	-0.00654106	0.779501
Gm42047	-0.0295301	0.0244526	-0.00826878	-0.0229237	-0.0127981	0.0107947	-0.0114453	0.779483
2310033P09Rik	-0.0666314	0.0112	-0.015608	0.0595029	-0.0258592	0.0735256	-0.0341755	0.779169
2610301B20Rik	-0.0269546	0.0320576	-0.0184532	0.00682053	-0.0220706	0.019821	-0.0147519	0.778728
Vps29	-0.0440638	0.0259852	-0.0244416	-0.0132198	-0.0574107	0.095641	0.0341441	0.778585
Fyb	-0.0151241	-0.00560019	-0.00359668	-0.00440626	-0.00566768	0.0063496	0.00174786	0.77853
Hcar2	-0.0320334	0.00647802	-0.00515167	-0.0229542	-0.0429926	0.210666	-0.0157947	0.778476
Fam96a	-0.0142379	0.0151048	-0.0522017	-0.0173157	-0.0312621	0.0626614	-0.0228951	0.77823
Src	-0.0485302	-0.00175961	0.0133809	-0.0163569	-0.0100381	0.0285419	-0.0206255	0.777437
Lrpap1	-0.0450379	0.0330595	-0.111712	0.0384941	-0.00523449	0.0822374	-0.0463909	0.777369
Gm19412	-0.0211261	0.00372629	0.0041327	-0.0078803	0.00435918	0.00815218	-0.00416494	0.777207
Plod2	-0.0732314	-0.0362251	-0.0789445	-0.0861938	0.0184041	0.185775	-0.127172	0.776737
Actr10	-0.0807183	-0.00253141	-0.0409903	-0.0240606	-0.111979	0.375559	-0.10348	0.776716
Nrtn	-0.0210886	-0.0159656	-0.00795884	-0.00124581	0.010989	0.0400547	-0.00278515	0.776621
Rb1	-0.0217008	0.0138184	-0.0059287	-0.0243463	-0.00788101	0.0188507	0.0061965	0.77642
Mcm10	-0.0142937	0.00952127	-0.00623955	0.0249755	-0.0114822	0.042566	0.0124179	0.775896
Snx7	-0.0181794	0.00585781	-0.0221513	0.000677393	-0.0355035	0.0925876	-0.0282923	0.775896
Tjap1	-0.011002	-0.00529031	-0.0154538	0.0177374	0.00760536	0.0784689	-0.0195217	0.775503
Thbs3	-0.0116398	-0.009967	-0.0148335	0.00665277	-0.00243454	0.0433618	-0.00297672	0.77548
Tm9sf2	-0.0351457	0.0379713	-0.143354	-0.0604284	0.00765181	0.116373	-0.0148312	0.775373
Irf2bpl	-0.119502	-0.0421339	-0.0225087	-0.0183953	-0.0533679	0.121775	0.0429807	0.774976
Btbd9	-0.0448116	-0.00867205	-0.0109064	0.0474233	0.0113937	0.0667319	-0.0120417	0.774775
Slc25a13	-0.00820744	0.0153755	-0.0325366	0.00878429	-0.000406337	0.0270902	-0.00873378	0.774532
Slc2a1	-0.0833709	-0.0224046	-0.0361975	-0.0860532	0.0013042	0.160947	-0.135035	0.774531
Tarbp2	-0.0203199	-0.00195355	-0.0337679	-0.0215807	-0.027966	0.113476	-0.0459762	0.774231
Kif20a	-0.0214018	0.025271	-0.0321565	-0.0403953	-0.0333551	0.125562	-0.0633714	0.774176
Rmi2	-0.0276417	-0.0061321	-0.0135108	-0.0229281	-0.0149519	0.264255	-0.0270267	0.774158
A830010M20Rik	-0.0137533	-0.00180234	-0.000113668	0.00992727	-0.00877432	0.0258834	-0.00679017	0.773817
Pik3c3	-0.0264216	0.000694691	0.00293805	-0.0175505	-0.00348182	0.0106405	-0.00475131	0.773355
Pisd	-0.0221511	0.0121171	-0.0116611	-0.0118208	-0.03971	0.0523141	-0.0135006	0.773177
Ap1s2	-0.0124245	-0.0026616	-0.0278669	-0.00154439	0.0303328	0.0662895	-0.0230416	0.773106
Akirin1	-0.117635	-0.0125307	0.0326942	-0.0853742	0.0397374	0.142371	-0.0652339	0.772817
Ywhag	-0.0452545	0.0563431	-0.0183253	-0.0950048	0.0306271	0.0996789	-0.0163754	0.772631
Itpk1	-0.0333274	-0.0289942	-0.0301274	-0.0154667	0.00842274	0.112276	-0.0436959	0.772586
Raly	-0.0137995	0.0300905	0.00433092	0.00963977	-0.0240376	0.0529866	-0.0139403	0.772549
Socs3	-0.211235	-0.0318798	-0.147956	0.271545	0.0647398	0.397526	0.0974479	0.77249
Acap3	-0.0229274	0.0290928	-0.0187511	0.000551803	-0.00364803	0.00839383	-0.0105021	0.772419
Eme1	-0.0183942	0.0109997	-0.000880821	0.0110524	-0.00168028	0.0110969	-0.0120328	0.771843
Sacs	-0.0084496	0.00604372	-0.0165181	-0.012667	-0.0215514	0.0525179	-0.0100528	0.771698
Zc3h14	-0.0337555	0.0410174	-0.101857	-0.061905	0.0214401	0.0770129	-0.0466392	0.771605
Irx1	-0.0872383	0.0179263	-0.0568392	0.121014	0.0683607	0.131678	-0.0272896	0.771473
Depdc5	-0.0231108	0.0129477	-0.000878154	0.0140518	0.000716798	0.0129759	-0.0137785	0.771241
Rpn2	-0.0584726	0.000258481	0.00563058	-0.0325154	0.0334481	0.101314	-0.0771336	0.77099
Iqsec2	-0.0079985	0.0144266	-0.0226416	0.00357531	-0.00278162	0.0203802	0.00990298	0.770491
Mea1	-0.0854792	-0.0226053	0.020623	0.0602331	-0.0388246	0.202943	-0.0137113	0.769863
Lix1l	-0.128256	0.0517108	-0.181464	0.143449	-0.0136779	0.152331	-0.0494458	0.769623
Pigk	-0.0140569	0.000194515	-0.0647497	-0.0146753	0.00626675	0.0654836	-0.0123981	0.769619
Carhsp1	-0.00768097	0.0198979	0.00452612	-0.0248245	-0.0148277	0.137659	0.00236177	0.769295
Immp2l	-0.0139006	0.0177069	-0.00505664	-0.0284875	-0.0120803	0.0483073	-0.0249651	0.769179
2900026A02Rik	-0.0978523	0.013403	0.0160826	-0.00461697	0.00131375	0.0274091	-0.00639195	0.769064
Lias	-0.058083	0.0074166	-0.00133768	0.0182406	-0.00363724	0.0175333	-0.0232865	0.768989
Snx13	-0.021536	0.0212008	-0.0195759	-0.043499	-0.00722026	0.0327982	-0.0232221	0.768577
Adamtsl3	-0.0351367	0.00398151	-0.0366636	-0.0309539	0.0254219	0.035873	0.0163578	0.767316
Gm10419	-0.0270922	0.00780171	-0.00625903	-0.0176102	-0.0152798	0.0129491	0.00769843	0.767174
Atad3a	-0.0525771	0.00580327	0.00682597	0.0213663	-0.037107	0.0827769	-0.0496452	0.767063
Zhx3	-0.00910977	-0.00481111	-0.000578892	-0.00601284	0.00753932	0.0201368	0.0010048	0.76702
Eif3d	-0.0816976	-0.00453877	-0.0516493	0.00841727	-0.00757765	0.0292664	0.0313944	0.766538
Arhgap1	-0.0244215	0.000409977	-0.00670442	-0.022825	-0.0314661	0.0359279	-0.0167664	0.766397
Itpripl1	-0.0189048	-0.00477762	0.0062703	-0.0111703	-0.00476146	0.0274441	-0.0115806	0.766147
Glipr2	-0.0427112	-0.0149332	0.0116506	-0.0321033	0.0232389	0.0909521	0.00724169	0.766065
Phf12	-0.0688206	0.00384062	0.00684084	-0.00826789	-0.0160772	0.0155714	-0.00699887	0.765955
Pepd	-0.0680125	-0.0230339	0.0118666	-0.00836403	0.0619798	0.124449	-0.0467317	0.765643
Myl6b	-0.0334493	-0.00698926	-0.00155191	0.00859222	-0.0176525	0.0692504	0.0263614	0.765456
Map7d1	0.00300002	0.0175154	-0.0231627	0.0167847	0.0899644	0.180896	-0.0244131	0.765228
Psmb2	-0.0881019	0.0351818	0.0238607	0.0702386	0.0475336	0.0681948	-0.0031769	0.765171
Alg6	0.00374295	0.0124631	-0.00292181	-9.55467e-05	-0.00438949	0.0356954	0.00113687	0.764946
Hmgcl	-0.038389	-0.0257643	0.00137389	0.00242405	-0.00935391	0.0911052	-0.0154956	0.764905
Map3k10	0.00739087	0.0184618	-0.0119356	0.000526143	-0.000490975	0.0460889	7.94141e-05	0.764285
Ap2a2	-0.0173819	0.0341745	-0.0488191	-0.00390282	-0.0366675	0.0501443	-0.0131909	0.764094
Fastk	-0.0573746	-0.00229561	0.0153535	0.0199147	0.0159098	0.0397728	9.14577e-08	0.763545
Diablo	-0.0461677	-0.0147611	-0.0143976	0.00789704	0.0259135	0.0496218	0.0255179	0.763508
Ttf2	-0.0110672	-0.00471081	-0.0042582	-0.0058379	-0.0138487	0.0327816	-0.00675449	0.76345
Akirin2	-0.0377662	-0.0041672	-0.0197412	0.0515953	0.00780223	0.0686594	0.0157793	0.763437
Abcc5	-0.00358945	0.00148003	-0.0116215	0.00299951	-0.00366634	0.0118768	-0.00578281	0.763384
Cadps2	-0.0103189	0.00301532	0.00395484	-0.0159343	-0.00140766	0.0280231	-0.00729909	0.763135
Clasp2	-0.0287624	-0.00610003	-0.0042994	-0.00148936	-0.0215147	0.0107243	-0.0143283	0.76298
Asph	-0.0679057	-0.0161514	-0.0062951	-0.0454917	0.0153796	0.0405505	-0.0578214	0.762799
Mbnl2	-0.107839	0.0643337	-0.137851	0.121338	-0.0248821	0.119455	0.0152486	0.762609
Crk	-0.0616345	0.0346325	0.0131596	0.0166724	-0.0203418	0.0313973	0.00589727	0.762486
Nkain1	-0.0134172	-0.000485375	0.00711743	-0.00777623	-0.0065283	0.0273112	0.00086351	0.762248
Snrnp40	-0.071436	0.0111156	0.0357318	0.0347989	-0.0334729	0.0965832	-0.00840168	0.762203
Def6	-0.0216165	-0.00839803	-0.0237268	0.00537285	-0.021724	0.0323613	0.00227636	0.762169
Rnf121	-0.0139687	0.0279225	-0.00111939	0.0150401	-0.00974717	0.0415747	-0.0289525	0.762087
Atp5c1	-0.026179	0.0144904	-0.145624	-0.00816768	-0.0583165	0.202256	-0.0626494	0.762014
Mcam	-0.017921	0.0171189	-0.010044	0.00988669	0.0106002	0.00870316	-0.00958952	0.761912
Cavin1	-0.14744	0.0317972	-0.0161512	0.0460104	0.103872	0.0745275	-0.0602555	0.761055
Tmem123	-0.011151	0.0120019	0.000786389	-0.0162589	-0.010289	0.153876	-0.0395711	0.760568
Emilin2	-0.0149941	-0.00966593	-0.0231554	-0.0274566	-0.00475978	0.202698	-0.00561328	0.760543
Nasp	-0.0499274	0.020381	0.0500684	0.0205142	0.0185345	0.190066	-0.0797608	0.76034
Topbp1	-0.0206424	0.0215169	0.0413424	0.0212492	0.0245718	0.072228	-0.0126491	0.760215
Vti1b	-0.0329678	-0.0153552	-0.0387301	-0.059693	0.0146328	0.338671	-0.0831895	0.760077
Ranbp3	-0.0146312	0.0230583	-0.0169626	0.00156141	-0.0358276	0.0490381	-0.00816193	0.759984
Rps29	-0.0832998	-0.0271277	-0.0630753	-0.173053	-0.0336928	0.269232	-0.0654013	0.759783
Ccdc43	-0.0255547	-0.0216453	-0.00754645	0.0473652	0.046365	0.22859	-0.0307109	0.75966
Mettl3	-0.00922626	0.00670505	-0.0229316	-0.0211777	-0.00249547	0.0160927	-0.00949541	0.759244
Fosl2	-0.135492	0.00382679	-0.104475	0.0559103	0.177874	0.153836	0.0155603	0.759121
Ankmy2	-0.0559315	-0.00958109	-0.0274672	0.00304625	0.00777359	0.0232332	0.0214392	0.758644
Wdhd1	-0.0119278	-0.00139535	0.000692568	-0.0140993	-0.0105596	0.0606961	0.00475979	0.758583
Fkbp14	-0.00293513	-0.00180089	-0.0176974	-0.0110478	0.00354303	0.0407595	-0.00464623	0.758549
Recql5	-0.00374922	0.00479829	-0.000351681	0.00296217	0.00478782	0.00969204	-0.00823009	0.757896
Smtn	-0.0557638	-0.0472817	-0.0255619	-0.0477272	0.00157775	0.148336	-0.0599216	0.75776
Rpl22	-0.0137163	0.0152921	-0.117641	-0.0740828	0.0095643	0.19753	-0.0555154	0.757673
Tet2	-0.0772719	0.00517776	-0.0963684	0.139332	-0.00316424	0.193777	-0.0477359	0.757529
Usp38	-0.0216471	-0.0102122	-0.00110527	-0.00634573	-0.00182907	0.0205875	-0.0220312	0.757231
Uqcrh	-0.0526008	-0.01334	-0.0749985	-0.129134	0.0294499	0.214882	-0.000858522	0.757059
Sh2d3c	-0.0200596	-0.0169516	-0.0130742	-0.0155042	-0.00558586	0.197559	-0.0126778	0.757038
Tmem126a	-0.0283812	-0.00521814	-0.0111122	-0.0210524	-0.0443922	0.0956949	-0.0180097	0.756968
Col16a1	-0.0101838	0.0195627	-0.0339359	-0.00789353	-0.0369516	0.0907554	-0.0368558	0.756765
Rab13	-0.0115097	0.00648551	-0.0936953	-0.022555	-0.0514187	0.328319	-0.042413	0.75655
Sharpin	-0.0243481	0.00933874	-0.00970789	-0.0021921	-0.019523	0.00311095	-0.00993974	0.75655
E2f6	-0.0271105	-0.00303325	-0.00330002	-0.0299686	-0.0356873	0.117878	-0.0221846	0.756453
Prkce	-0.0222398	-0.00452094	-0.00897357	-0.000393335	0.0252947	0.0238293	0.00251578	0.756366
Elmsan1	-0.035421	0.000536546	0.0130833	0.0305396	0.0204732	0.0471624	-0.012563	0.756268
Klhdc3	-0.0202974	-0.00685913	-0.0125857	-0.0193471	-0.0296218	0.150699	-0.00293683	0.756265
Psmc1	-0.036548	-0.0292065	-0.106094	-0.0917358	0.0440687	0.321708	-0.0829931	0.75621
Htatsf1	-0.0335823	-0.0215498	-0.0186293	0.0156454	0.01297	0.0746572	-0.0414141	0.755773
Tsacc	-0.0265487	-0.0235334	-0.0216447	-0.0141418	-0.00847025	0.347495	-0.00540163	0.755769
1600002K03Rik	-0.0209238	0.000283221	-0.0113699	-0.0457423	-0.0154351	0.109488	0.00665324	0.755712
E2f3	-0.00578794	0.00463779	-0.0110168	-0.0214943	0.0238341	0.0624596	-0.0143468	0.755681
Snrpg	-0.165237	0.0587882	0.0309264	-0.142428	0.0371686	0.128922	0.0405616	0.755624
Nmrk1	-0.0244882	0.00423669	-0.00388165	0.015456	0.000648508	0.0107381	0.000252373	0.754943
Rbm26	-0.057226	0.0160007	-0.109758	-0.0187756	0.0559459	0.0549742	-0.0227627	0.754914
Nol11	-0.0913558	0.0112512	0.00786718	0.0138151	0.000128248	0.0208147	-0.0161459	0.754861
Abhd18	-0.024403	-0.0159736	-0.0288463	0.0175783	0.0056309	0.0427448	-0.0179594	0.754109
Mrpl18	-0.127976	0.0271433	0.055505	-0.0253898	-0.0713157	0.111765	-0.0299737	0.754082
Itgb1bp1	-0.0508932	-0.0458577	-0.0963242	-0.0668818	-0.0542483	0.27525	-0.0102675	0.754074
Trappc12	-0.018666	0.000679029	-0.00809154	-0.00638221	-0.0326731	0.0503209	-0.00930455	0.754015
Polr1b	-0.0133557	0.0116824	0.00589666	-0.000200707	-0.00980021	0.0225127	-0.0163801	0.753948
2610021A01Rik	-0.015005	0.0111343	-0.00163127	-0.00144316	0.00713609	0.00530607	-0.0107858	0.753937
Gna13	-0.0399995	-0.0292806	0.00819977	-0.0145166	0.0401221	0.167342	-0.0287214	0.753879
Hmga1b	-0.347051	-0.0548856	0.00412025	-0.192901	0.138659	0.271769	0.105998	0.753832
Npc2	-0.105157	-0.083175	-0.0692655	-0.0331677	0.108176	0.313455	-0.128336	0.753737
Gtf2f2	0.00716477	0.0169695	-0.0208341	0.00222443	0.00303103	0.0514314	-0.00709574	0.753477
Gpatch2l	-0.00539288	0.00443543	-0.00544233	-0.00659627	0.0032976	0.0131671	-0.0142543	0.753
Nfkb1	-0.127268	-0.0316977	-0.351795	0.0412976	0.0871496	0.306385	0.0155153	0.752929
Aar2	-0.0261187	-0.00307319	0.0202818	0.00471335	0.00142465	0.049824	-0.0107027	0.752826
Nek9	-0.0149556	-0.00598312	-0.0141013	0.00267557	-0.0198936	0.0568555	-0.0257271	0.752627
Top1	-0.0439395	0.055532	-0.106352	0.0496543	0.0350407	0.0778889	-0.0493392	0.752361
Glis3	-0.0822423	0.00143869	0.0164181	-0.0516538	0.0489354	0.0964189	0.0443899	0.752308
Ngdn	-0.057331	0.00645256	0.0161773	0.0787978	-0.0378022	0.155219	0.00867761	0.752066
Dlat	-0.0194191	0.0287379	-0.00288913	-0.0299078	-0.00648742	0.0376482	-0.0320203	0.751499
Hddc3	-0.0186719	0.00203347	-0.0168576	0.0110742	0.00923738	0.00956637	-0.00662488	0.75124
Cisd2	-0.00525779	-0.0102934	-0.119824	-0.0258072	0.0194329	0.279329	-0.0215864	0.751013
Ctsz	-0.0554481	0.0299115	-0.0349628	0.0163317	-0.0678277	0.0507619	-0.0501214	0.750902
Arf6	-0.0956477	-0.0656366	-0.0371043	-0.0126465	0.045085	0.0957163	-0.0496402	0.750664
Hif1a	-0.062841	-0.0388597	-0.135806	0.0308178	-0.0963801	0.342997	-0.109794	0.750543
Psmb1	-0.227713	0.00863022	0.0711091	-0.0454101	0.0237839	0.108798	0.00285228	0.750536
Ltbp2	-0.0682435	-0.0866953	-0.146375	-0.0592924	0.0771662	0.499125	-0.133468	0.750452
Ppt1	-0.0369379	0.0372922	-0.0151125	0.0042019	-0.0238278	0.0446723	-0.0634334	0.749978
Pdhx	-0.00992952	-0.000572845	-0.00598767	-0.0178688	-0.0133717	0.0410488	-0.0151605	0.74989
Tmem230	-0.0406522	0.0014662	-0.00747322	0.00424225	-0.0357427	0.0191116	-0.0130942	0.749642
Spaca6	-0.0301006	-0.00178657	0.0132248	0.00220305	0.0166997	0.0335787	-0.0183802	0.749527
Cnot10	-0.0380863	0.00100052	-0.0168834	0.0113213	-0.0320416	0.0202757	-0.00174438	0.749463
Sdc2	-0.115889	0.125411	-0.280559	-0.0656714	0.125452	0.149073	-1.75358e-05	0.749101
Rab3a	-0.0265994	0.00863325	-0.0201093	0.0346028	-0.00180913	0.0292632	-0.0100762	0.74795
Polr2j	-0.125374	0.0587901	0.0174517	-0.0185423	0.00562348	0.0248193	-0.00349786	0.747942
Slc35c2	-0.015084	-0.00184091	-0.0152299	0.0148063	-0.0227913	0.0561975	-0.0186102	0.747526
Gfod2	-0.100638	0.0212485	-0.00808336	-0.0278895	-0.111206	0.114728	-0.116505	0.747242
Baz1a	-0.103197	0.0131427	0.0538047	-0.00944838	-0.0188427	0.101209	-0.0711592	0.746941
Srsf10	-0.0301233	0.0242596	-0.033008	0.00680647	-0.000724504	0.0198712	-0.0464662	0.746661
Socs7	-0.0248101	0.00244656	0.00269139	0.0222881	0.0146165	0.0224876	0.00010001	0.746618
Efnb2	-0.03762	0.00718747	-0.0369793	-0.0887176	0.00276585	0.106788	-0.07294	0.746283
Stil	-0.0108752	0.00105362	-0.000445878	-0.0096708	-0.0125031	0.0134323	-0.00910766	0.746124
Bdkrb2	-0.0301514	-0.00329422	0.00728891	-0.0134901	0.00656502	0.018402	-0.0170071	0.746034
Spry2	-0.125775	-0.01242	-0.0740088	-0.0323466	0.162669	0.13619	0.0151562	0.746016
Ccdc32	-0.0351578	0.000230911	-0.0187038	0.00220137	0.0128472	0.0068717	-0.0278679	0.745841
Ndufb10	-0.124897	0.018324	-0.00115053	0.0563666	0.0237721	0.0450423	0.0078502	0.745798
Brix1	-0.0842269	0.0674729	-0.0945687	0.00956211	0.0262543	0.0198992	0.00051437	0.74579
Lysmd3	-0.0244796	0.00744219	-0.0191746	-0.0216224	-0.0299234	0.0101371	-0.00527233	0.745515
Tfcp2	-0.0133497	0.00441156	-0.00284118	0.0164329	0.0152407	0.0163051	-0.00287814	0.745283
Eed	-0.0367475	0.049657	0.00681767	0.0459684	0.0196519	0.0625421	-0.0521241	0.745023
Actn1	-0.0257418	-0.0085172	-0.0522287	-0.0255332	-0.0571943	0.179797	-0.0641371	0.744814
Prpf6	-0.0663717	0.0645925	-0.0474735	-0.00455194	-0.0283557	0.00898532	-0.0317204	0.744415
Mtx2	-0.124415	-0.0299368	0.0383698	0.00504389	-0.0773542	0.199725	-0.096376	0.744217
Styx	-0.0181384	0.0069066	-0.00339225	-0.00842104	0.0306983	0.023686	-0.00391486	0.743865
Mecom	-0.00297793	0.00285708	-0.0169835	0.00502262	-0.00640075	0.0235672	-0.00861858	0.743724
Clcc1	-0.0129162	0.002838	-0.00320033	-0.0312939	0.0112218	0.157404	-0.0514357	0.743564
Sri	-0.0766077	-0.0459783	0.0281873	0.0280149	0.00423506	0.191875	-0.0384507	0.743556
Iscu	-0.00169566	-0.00265321	-0.0226179	-0.0195659	0.00911966	0.136611	0.0199089	0.743425
Pde12	-0.0170722	0.00659576	-0.0125074	0.00429038	0.0161432	0.0098557	0.0068912	0.742978
Ulk3	-0.0195133	-0.00396309	0.00983877	-0.00609567	-0.00788933	0.0277091	-0.0072543	0.742927
Npat	-0.0348144	-0.00253299	0.00163562	-0.007351	-0.0297857	0.0219677	-0.0223287	0.742808
Herc2	-0.0366582	0.0125979	0.0349365	-0.0650813	0.0235354	0.152652	-0.00734004	0.742752
Sec24b	-0.025466	0.00494096	-0.0803439	0.0156293	0.0276683	0.105033	0.0510001	0.742733
Diaph3	-0.000382698	0.0363489	-0.043228	-0.0280164	-0.0316068	0.124069	-0.0445381	0.742681
Ccnd2	-0.0734085	-0.0827265	-0.0961749	-0.0697618	-0.0703488	0.333896	-0.0811442	0.74247
Ap3m1	-0.00733892	-0.00572855	-0.020853	-0.00661764	0.0163621	0.0384543	-0.0128055	0.742467
Acly	-0.0187008	0.00514006	-0.065715	-0.070765	-0.0472401	0.17137	-0.0172876	0.742334
Pcgf3	-0.0656865	-0.0169173	0.0280812	-0.0406155	0.0243816	0.123821	-0.062601	0.741922
Nipal1	-0.0204216	-0.0170876	-0.0223415	-0.0402148	-0.0130553	0.0894594	-0.0158927	0.741879
Rcor1	-0.0381551	0.0219411	-0.104288	0.0177025	0.0338918	0.0636611	-0.0457008	0.741563
Paqr4	-0.0121679	0.00476905	-0.00182997	-0.0126776	-0.00843781	0.0262268	0.0133659	0.741436
Pdpk1	-0.0979521	0.0107139	-0.0294704	0.0391926	0.0205357	0.0224577	0.00378501	0.741408
Kat2a	-0.0646083	-0.00813344	0.0102821	-0.0341815	0.0421609	0.0515797	-0.0130337	0.740833
Med9	-0.0242964	0.0265361	-0.0131216	-0.0050387	-0.0617546	0.123269	-0.0506041	0.740819
Cxcl3	-0.0359743	0.0465536	-0.0306092	-0.0822853	-0.0378852	0.0739327	-0.0420429	0.740521
3300005D01Rik	-0.121724	-0.03516	-0.00371725	0.0201779	-0.0106189	0.0743958	0.0327126	0.740237
Psmb4	-0.0301017	0.000610792	-0.115822	0.00602263	-0.0398572	0.118118	0.00911397	0.739961
Rps2	-0.248402	0.0132283	0.102144	-0.0447311	-0.119422	0.20779	0.00490789	0.739868
Sec14l1	-0.0236045	-0.0107661	-0.0270212	0.00470943	-0.0356188	0.0480949	-0.0245929	0.739862
Pfn2	-0.00604498	-0.00471466	-0.00376407	-0.00799244	-0.00363052	0.0757393	-0.015225	0.739649
Epha1	-0.055434	0.0239403	-0.074445	0.0425632	0.032115	0.0413033	-0.0390549	0.739219
Cdca7l	-0.0537293	0.00442878	0.0224668	-0.0378438	0.0203471	0.049118	-0.0027471	0.738835
Msrb1	-0.0703293	0.0262172	-0.0257312	0.0275642	-0.0209567	0.00991805	-0.0116194	0.738742
Loxl3	-0.0461433	0.0259389	-0.0191522	0.00266714	0.0150509	0.00263616	-0.00218645	0.738623
Hectd3	-0.0130931	0.00161616	-0.00723453	0.00551901	-0.0123156	0.00721974	-0.00677537	0.738537
Ncoa4	-0.0292542	-0.0145375	-0.0243691	0.0284089	0.0138834	0.0447349	-0.000575682	0.738376
Slc25a12	-0.0209562	-0.0169805	-0.0169531	-0.0290571	0.0025707	0.0329885	-0.0228209	0.738302
Hmgn3	-0.091814	0.0335153	-0.0222199	0.0194002	-0.14316	0.152792	-0.043948	0.738124
Galk1	-0.0397384	-0.0159959	-0.046216	0.0592057	-0.0032291	0.314329	-0.13191	0.737976
Trak1	-0.00797004	0.0181207	-0.00254355	0.00453637	-0.0203402	0.0362739	-0.0148236	0.737942
Erc1	-0.027814	-0.0262812	-0.00299386	-0.00647221	0.00505751	0.0739828	-0.0210703	0.737866
Smcr8	-0.0217053	-0.0104633	0.00848298	-0.0208853	-0.0147059	0.134978	-0.0220062	0.737852
C1qtnf12	0.0117509	0.000724753	-0.102535	-0.025811	0.0367972	0.278853	-0.0074426	0.737461
Klc1	-0.0235795	0.00127862	-0.118877	0.0584542	-0.0618417	0.242965	-0.00897835	0.737017
Gm11110	-0.00671688	-0.0124759	-0.0222352	-0.0262586	-0.000445195	0.226699	-0.0200705	0.736786
Mepce	-0.0949042	-0.0330484	0.0149769	0.0705809	0.00559443	0.123744	-0.0125783	0.736627
Bag2	-0.0170728	0.0168353	-0.0200937	0.0230357	0.00874636	0.0422508	0.0404093	0.736565
Memo1	-0.022757	0.000455918	-0.0202061	-0.0526192	-0.020699	0.109755	0.0201056	0.736141
Ecsit	-0.0125612	-0.00340216	-0.00658052	0.000316517	0.0342653	0.0778105	-0.0337146	0.736087
Gmpr2	0.00361061	0.0219197	-0.0284567	0.00830836	-0.0278086	0.09717	-0.010201	0.735868
Cox10	-0.0280723	0.00298392	0.00152668	0.0177791	-0.00785942	0.0172169	-0.00821475	0.735804
Ndufa7	0.0057203	0.0214699	-0.0417455	0.0198388	0.101109	0.154116	0.0590839	0.735764
Gm48855	-0.0238506	-0.00198255	-0.000784536	0.00237929	0.014431	0.012215	-0.0124475	0.735736
Spopl	-0.0329208	-0.00763425	-0.0412778	0.0139275	-0.00922172	0.0136211	-0.00887332	0.735415
Gpi1	-0.115945	0.02349	-0.000622139	0.0309226	-0.0116691	0.0620514	-0.117794	0.735299
Copb2	-0.0790502	0.00961305	-0.033909	0.0101499	0.110247	0.0731572	-0.0228634	0.73453
Rbbp7	-0.0951325	0.0291408	0.0496599	-0.0157713	-0.00214148	0.071661	-0.0649321	0.734489
Mzt2	-0.00619265	-0.000444465	-0.00534807	0.00107542	-0.0176549	0.0579502	-0.00136621	0.734467
Ifrd1	-0.0689697	0.0333557	-0.202636	0.142979	0.10703	0.230601	0.0422946	0.734173
Ncapd3	-0.0394788	0.00756249	0.0139758	-0.0361723	-0.00968925	0.0328605	-0.0179438	0.733961
Plekho1	-0.0410783	-0.030812	-0.0409318	-0.0496522	0.0043072	0.0273573	-0.0193368	0.733828
Vapa	-0.144409	-0.024297	0.0105757	-0.0113163	0.0626222	0.0720199	-0.0812569	0.733687
Zfp961	-0.0142631	0.00613693	0.00447178	-0.0056829	0.0038971	0.00652991	-0.00811483	0.733284
Exoc3l4	-0.0251162	0.0413068	-0.0707425	-0.00219156	-0.0797198	0.103613	-0.0111396	0.733253
Imp4	-0.0445609	0.0246792	0.0499229	0.0520992	0.00137267	0.13794	-0.0555227	0.733088
Commd4	-0.0405548	-0.0128192	0.00849461	0.059599	0.0430961	0.157987	-0.0594743	0.732993
Abcd3	-0.0152825	0.0137708	-0.0280141	-0.0186098	-0.0195118	0.00901224	-0.0157995	0.732598
Pld2	-0.0333222	-0.0176928	-0.00900084	-0.0252489	0.0145937	0.0242565	-0.0138232	0.73257
Josd2	-0.0255753	0.00230699	0.0106105	0.056616	-0.00559733	0.0974184	0.0284897	0.732481
Coro1a	-0.0345944	-0.0185874	-0.00564858	-0.0140139	-0.0412566	0.142415	-0.0515274	0.732406
Ldha	-0.044369	0.014672	-0.0889402	0.0708648	0.114485	0.273821	-0.160678	0.732344
Ndufb6	-0.0332101	-0.0244084	-0.0494593	-0.0438557	-0.0607282	0.178565	-0.0027626	0.732082
Phb2	-0.0721779	-0.0185977	0.0466346	-0.0410332	-0.0360128	0.183774	-0.0406126	0.731598
Sav1	-0.0700145	0.00470613	0.0249206	0.0300949	-0.0370248	0.0858076	-0.0528046	0.731583
Txlng	-0.0443226	-0.000882828	0.00278279	-0.0143051	0.0102748	0.0163773	0.0108196	0.731327
Nudt5	-0.026771	0.00592337	-0.0257894	-0.0203381	-0.0430343	0.194799	-0.102684	0.731307
Mogs	-0.032449	0.0378269	-0.0207041	0.0103991	0.010866	0.0167173	-0.0367335	0.730965
Btbd6	-0.0182335	0.0376348	-0.0326748	-0.0221717	-0.0257448	0.0379857	0.0151543	0.730893
Fermt2	-0.0522052	-0.0305844	-0.218223	0.0783266	-0.0666734	0.320942	-0.0680048	0.730635
Ccdc28b	-0.00351405	-0.00511231	-0.0141159	0.00241281	-0.000561312	0.0244343	-0.0058843	0.73061
Ip6k1	-0.0704754	-0.0392109	-0.0176081	0.00266747	-0.0134474	0.15138	0.0683263	0.730591
Mthfd1l	-0.0136214	0.00996166	-0.0377133	-0.00959111	-0.0381365	0.0444413	-0.0265159	0.730357
Higd1a	-0.14627	-0.125272	-0.234637	0.0281197	-0.00716084	0.349917	-0.283439	0.730007
Usp2	-0.0112105	0.00167447	-0.0256652	0.0190528	0.00686109	0.0259362	-0.000165414	0.729487
E130307A14Rik	-0.0289976	-0.0214584	0.0187083	0.00532442	-0.0110747	0.154346	0.00175592	0.729351
Cpsf2	-0.0112373	0.00449451	-0.0595788	-0.0125047	-0.0313376	0.0603503	-0.0313569	0.72891
Pgk1	-0.0921269	-0.0711733	-0.197044	-0.0156786	0.0341428	0.51307	-0.32483	0.728815
Slc9a8	-0.0163564	-0.00736253	0.0035644	-0.0152145	-0.0288763	0.209134	-0.0286696	0.728804
Minos1	-0.00115249	0.00944562	-0.0161497	-0.0499179	0.00314659	0.148871	-0.0194114	0.728683
4930471E19Rik	-0.0134705	0.00993618	-0.00800958	-0.0173486	-0.000265173	0.00407539	-0.00674302	0.728205
Cox6a1	-0.0237758	0.0162259	0.00584778	-0.0559389	-0.050909	0.204338	-0.0420766	0.728146
Mrnip	-0.0136391	-0.00123806	-0.0197634	0.040913	0.0243535	0.0575195	-0.000265424	0.728115
Rcn1	-0.0645529	0.106185	-0.0399174	0.047676	0.0931143	0.0572603	-0.0356042	0.727704
Lrrc75a	-0.0290891	0.00138414	0.0118901	0.00378772	-0.0311328	0.0531909	-0.00688069	0.727489
Ube2z	-0.00618173	0.0440275	-0.0139849	0.00630823	-0.051632	0.145964	-0.052835	0.727396
Suds3	-0.00407579	0.0303487	-0.0110567	-0.0264359	0.0228025	0.0430874	-0.0165356	0.727353
Kat5	-0.0727229	-0.040702	-0.00142944	-0.0076496	-0.0388742	0.29856	0.0960609	0.72724
Mrpl37	-0.0400486	0.0242176	-0.0304023	-0.0142021	0.0117554	0.00231779	0.00481682	0.727133
Hccs	-0.00721716	0.0108623	-0.0195334	0.0051171	0.0163796	0.0145918	-0.00184715	0.727013
Mcts2	-0.040788	0.0244383	-0.00247419	-0.00804695	-0.00755915	0.0016384	-0.0123325	0.726792
Lgmn	-0.0790124	-0.064659	-0.133401	0.00609231	-0.105556	0.274421	-0.165308	0.726477
Rps6ka3	-0.0291215	-0.00953011	-0.0266589	0.0327065	-0.0161856	0.0528945	-0.0290969	0.726386
Mapkapk5	-0.00876024	0.00480389	0.00340339	-0.00433388	0.00865402	0.00986492	-0.00807413	0.726256
Mkrn2	-0.0416085	0.00868788	0.0182836	-0.00512894	-0.0225767	0.0336385	-0.0256864	0.726212
H1f0	-0.198372	-0.0391368	-0.0898938	0.234567	-0.0216017	0.256994	-0.0769468	0.726209
Ak2	0.00428843	0.0138288	-0.0377715	-0.0374813	-0.0167437	0.166938	-0.040481	0.725707
Calm1	-0.0224777	0.0191944	-0.28497	0.120612	0.00810739	0.415656	-0.119442	0.725524
Elf3	-0.00968828	-0.00152842	-0.018179	-0.0237091	0.00902837	0.095305	0.037223	0.725351
Pfkfb3	-0.0493302	-0.0136069	-0.0179768	0.0805288	-0.0069157	0.119816	-0.0297936	0.725329
Lamtor3	-0.0323805	-0.0235693	-0.0910612	0.018579	-0.0206762	0.128461	0.0280309	0.724568
B230354K17Rik	-0.0179664	0.000360298	-0.00338332	0.0156039	-0.0220512	0.0396189	-0.0158202	0.724052
Gm10260	-0.0640091	-0.0036743	0.00981987	-0.0782591	-0.0792857	0.177462	-0.0704549	0.724
Stat5a	-0.0169401	-0.0060253	0.00573843	0.0140242	0.000806762	0.0288832	-0.00749114	0.723702
Gaa	-0.0442417	0.00348271	-0.0132234	-0.0308114	0.00191776	0.00250121	-0.0440741	0.723685
Eno2	-0.0363932	-0.0308756	-0.0311967	0.0312247	-0.00991781	0.079074	-0.00293606	0.723676
Pkia	-0.00669644	-0.00674135	-0.000610408	-0.00638332	-0.00532979	0.0465558	-0.00772622	0.723491
Ogfod2	-0.0093518	0.000622026	0.00385271	-0.00767566	-0.00410453	0.011344	-0.00874922	0.722849
Etf1	-0.0377097	0.0193788	-0.0321831	-0.135695	-0.00101155	0.17034	-0.0477023	0.722819
Chrac1	-0.0564216	-0.0130239	-0.0455672	0.0073258	-0.0346051	-0.00428462	-0.0303714	0.722516
Rcor2	-0.0167097	0.00776303	-0.0180441	-0.0117863	0.0645646	0.0636242	0.00207583	0.722377
Fst	-0.0335422	-0.0132871	-0.0138416	0.0724602	-0.0278322	0.185693	-0.0426446	0.722197
Mettl14	-0.00586071	0.0129047	-0.0154993	0.0126934	-0.0122664	0.0295592	-0.0187784	0.72084
Bicra	-0.0209128	0.0155081	0.00466443	-0.0101285	-6.85259e-06	0.00705973	-0.0110673	0.720154
Bmp7	-0.105317	-0.122726	-0.110864	-0.0842679	0.0573564	0.249939	-0.0044413	0.719885
Hs1bp3	-0.0221522	-0.00496122	0.00411326	-0.00210337	-0.0178382	0.0196226	-0.0105109	0.719629
Rtel1	-0.0184407	-0.000723719	0.00844924	0.00056686	-0.0179867	0.0331169	-0.0111256	0.719431
Tpbg	-0.117573	-0.0106294	-0.00870474	0.0329041	0.0486205	0.0401338	-0.0408525	0.719205
Rita1	-0.0506083	0.00118833	0.00287291	-0.0106058	0.0191342	0.0121136	-0.000255854	0.718767
Atp5e	-0.026153	0.0569457	-0.0876248	-0.151947	-0.0709175	0.219635	-0.0300041	0.718738
Snx16	-0.0149859	0.0125493	-0.0299056	0.0180854	-0.0152589	0.0222962	-0.00869929	0.718519
Keap1	-0.0622891	-0.0380085	0.0111371	0.032159	0.018946	0.113477	-0.0455461	0.718338
H2afz	0.0283638	0.0585917	-0.162275	0.0162493	-0.040733	0.373013	-0.115506	0.718125
Acvr1	-0.0337899	-0.00931304	-0.00449985	-0.00595874	0.0153696	0.0130052	-0.0222125	0.718027
Nvl	-0.0399796	-0.00563132	-0.00723651	0.0484626	-0.0445177	0.102547	-0.0104564	0.717971
Ash1l	-0.0725319	0.00273559	-0.0584231	0.0649935	0.0580494	0.0600441	-0.0311531	0.717934
Tbc1d4	-0.00423307	-0.00509403	-0.00343796	-0.00758839	0.0109574	0.0314792	-0.00580082	0.717652
Prpf8	-0.0623174	0.00301708	-0.00799722	-0.0129798	0.0507321	0.0362798	-0.0513904	0.717587
Ak4	-0.00529744	-0.00356832	-0.0299098	0.00540481	0.0165351	0.0712066	-0.0373697	0.717361
Atad2	-0.118781	0.0680375	0.0247448	-0.00893108	0.021181	0.027255	-0.0532108	0.717345
Lhx6	-0.0121705	-0.00223465	-0.0035311	-0.00829441	-0.00394675	0.00736555	0.00613205	0.717292
Fyn	-0.0452212	-0.0312154	0.0237364	-0.0441141	0.0708808	0.202873	-0.0352243	0.717
Cpq	-0.0334678	-0.0425934	-0.0452896	-0.0568819	-0.0452486	0.20055	-0.0282143	0.716954
Ran	-0.0866632	0.0559548	0.0604223	-0.0863768	-0.0581126	0.140161	-0.0295306	0.716885
Rsbn1	-0.150733	-0.0231284	-0.149639	-0.00190344	0.135218	0.0915274	0.0165092	0.716275
Csf1	-0.142318	0.137224	-0.240593	-0.00172728	0.136899	0.0899628	0.0278537	0.716257
Prkaa1	-0.0148981	0.0126127	-0.00845257	-0.0128675	0.0144726	0.0237148	-0.0327981	0.7162
Hilpda	-0.0250673	-0.0470862	-0.0672811	-0.055212	0.0893965	0.294523	-0.0681708	0.715931
Gnb4	-0.0754013	-0.00406712	-0.0291115	0.0138802	0.0492826	0.105817	0.101873	0.715306
Exosc3	-0.0399319	0.00319442	0.0462409	0.0517363	0.0292754	0.10643	-0.0227371	0.715263
Nmnat1	-0.0194061	0.000783649	-0.00332283	0.017052	-0.0197149	0.0288432	-0.0101072	0.715098
Trmt2b	-0.00941545	-0.00566473	-0.00255633	-0.0148154	-0.00163997	0.0398165	-0.021658	0.714998
Gm6169	0.00326501	0.0125004	-0.00865162	-0.0171181	0.0215907	0.0441894	0.00638203	0.714903
Ubl4a	0.00740776	0.0216842	-0.0521713	-0.021497	0.0207262	0.0814215	0.0098836	0.714792
Slc35b2	-0.0243555	0.0140095	0.0199817	-0.0175896	0.0207264	0.0737706	-0.0501924	0.714559
Gnl3	-0.0283263	0.059465	-0.190265	0.0172489	0.0437575	0.127921	-0.0186158	0.714469
Zfp386	-0.0111994	-0.00479927	-0.00912325	-0.00633254	-0.0212519	0.0234234	-0.0119147	0.714399
Il15ra	-0.0494484	0.0422163	0.000362357	-0.00750951	0.0209525	0.00910474	-0.00345252	0.714228
Fasn	-0.0185008	0.0157964	0.00897748	-0.0269982	-0.0484085	0.131232	0.0117479	0.714069
Neo1	-0.033812	-0.024149	-0.0104015	-0.0619693	0.0679232	0.162382	-0.026017	0.713979
Ankrd9	-0.0116626	-0.028617	-0.0487646	-0.0279382	-0.0235793	0.183691	-0.0194327	0.71371
Stam	-0.0235951	-0.0279247	-0.0690523	0.0130554	-0.00152939	0.0918348	0.00624444	0.713676
Ppp1r18	-0.0574262	0.0371229	0.00140268	-0.133171	0.0594506	0.144228	-0.0111911	0.713342
Fars2	-0.0277615	0.0106788	-0.0148066	0.0275868	-0.0276531	0.0313003	-0.0166832	0.712905
Acyp1	-0.0820816	-0.00629201	0.0218526	0.00173823	-0.0283681	0.0348521	-0.0281905	0.712479
Ddx10	-0.0708054	-0.0214682	0.0147613	0.00880036	0.0385361	0.052958	-0.0116756	0.712405
Atrip	-0.0175105	0.00429465	-0.00472473	0.0174096	-0.00232076	0.010939	-0.00183268	0.712245
Cep152	-0.0126418	9.55713e-05	0.00116836	-0.00381432	-0.0117063	0.00929441	0.00038811	0.712233
Prss23	-0.00934006	0.0186205	-0.00863273	-0.010144	0.0138688	0.0100516	-0.0045365	0.711933
Hypk	-0.0792412	-0.00907933	0.0343808	-0.00566017	-0.0189192	0.0537355	-0.00724679	0.711791
Bri3bp	-0.0897882	0.0173017	0.0137315	-0.0355792	0.058569	0.0367966	-0.0122284	0.711514
Thoc6	-0.0794603	-0.00644026	0.0397646	0.012075	-0.0162902	0.0637737	-0.0168431	0.711509
Nat9	-0.0504616	-0.0195009	0.0246968	0.0376504	-0.0373066	0.140808	0.00325774	0.711312
Myef2	-0.02983	-0.0166995	-0.0303746	0.0498513	0.00147049	0.104906	0.0408368	0.711163
A430005L14Rik	-0.0210045	0.00489983	-0.00946234	-0.0171733	-0.0204646	0.00886975	0.00353614	0.710578
Dusp8	-0.0185258	0.025404	-0.0176314	-0.0316913	0.0257796	0.0237316	-0.00647123	0.710141
Cbx3	-0.0237648	0.0510856	-0.00841064	-0.0466839	0.0321693	0.051857	0.0306746	0.710042
Pus7	-0.0385594	0.014499	0.0208618	-0.0252393	0.0218703	0.0369237	-0.0272945	0.710031
Usp1	-0.0734948	0.0245859	0.0292693	0.0093169	-0.0264798	0.0590768	-0.0704942	0.709455
Mipol1	-0.0907023	-0.0484954	0.0375325	-0.0852892	-0.00367565	0.195642	-0.073104	0.70931
Aars	-0.0518974	-0.00693889	-0.0165172	-0.0406206	-0.0728233	0.0524521	-0.0636854	0.709305
Pcbp1	-0.0494235	-0.0042061	0.0235923	-0.0321739	0.0426715	0.0652599	0.00897088	0.709299
Nt5dc2	-0.0204846	0.0466903	-0.202184	0.0686218	0.0772947	0.188407	-0.0248439	0.709268
Ifitm1	-0.0290461	0.0019858	-0.0108334	-0.0868272	-0.0223876	0.167194	0.0264616	0.709101
Hbp1	-0.0376388	-0.0236818	0.0134021	-0.00722803	-0.0332649	0.111442	-0.0244488	0.708879
Zfp212	-0.011592	-0.0069079	-0.00774586	-0.00716394	-0.0159661	0.00552268	-0.00931306	0.7085
Tmem43	-0.0141665	-0.00918387	-0.0178008	-0.0655927	-0.0158149	0.164115	-0.0351108	0.708398
Gapdh	-0.0309384	-0.0785448	-0.139078	0.0105026	0.0686435	0.438124	-0.157286	0.707841
Dld	-0.0660754	-0.0346298	0.042735	-0.00323951	-0.0046311	0.230547	-0.0977967	0.707837
Apex2	-0.0340772	0.00271633	-0.00251218	0.0188308	-0.018636	0.0168574	-0.00818421	0.707827
Dpf1	-0.00995091	0.00357186	0.00112561	-0.0143708	-0.00409793	0.00985802	-0.00154161	0.707786
Gtf2h4	-0.0181622	-0.00483946	-0.00424421	0.0364731	0.0124761	0.0526894	-0.01755	0.707483
Zswim1	-0.00695258	-0.00111437	0.00471291	-0.00448777	-0.00585201	0.0167115	-0.0036623	0.707408
Dusp1	-0.432896	-0.0456303	-0.004185	0.164754	-0.152292	0.19873	0.0424192	0.70734
Bcar3	-0.0047292	-0.0135808	-0.050838	0.000805494	0.0426261	0.104258	0.00981608	0.7073
Adcy3	-0.029324	-0.0261995	0.00213822	-0.0190593	0.022364	0.0762267	-0.0251119	0.707156
Gab1	-0.00444297	-0.00304336	0.00103635	-0.0042495	-0.0021176	0.0500294	-0.0186711	0.707038
Pdxk	-0.020553	-0.0125596	-0.00275468	-0.0311917	-0.00363903	0.0388713	-0.003857	0.707033
Scrn1	-0.00444314	0.00855113	-0.00100101	-0.0012909	-0.0150736	0.0401194	-0.0201932	0.706925
Rfc4	0.0404606	0.0366578	-0.0161858	0.0689305	0.0307521	0.234244	-0.0326027	0.706731
Miga1	-0.0635307	0.0293199	0.00797703	-0.0771995	-0.00743106	0.0390331	-0.0147388	0.706718
Cdc14a	-0.0331407	-0.000670663	-0.0321901	-0.0132762	-0.0466935	0.0214826	0.00244924	0.706641
Becn1	-0.0364548	-0.0155234	-0.00413513	0.0363574	0.0434297	0.0699582	-0.0246583	0.706635
Coa5	-0.036292	-0.0025441	0.0104592	0.00799296	-0.0347089	0.0459851	-0.0136144	0.70657
Acvr1b	-0.00781094	0.00280681	-0.00488911	-0.00926091	-0.00425236	0.00901611	0.00710135	0.706537
Emc1	-0.0341326	0.000502539	-0.0100508	-0.0510475	0.0301593	0.0412356	-0.0194311	0.706293
Ensa	-0.0292202	-0.00430598	-0.0432067	-0.0220122	-0.0694661	0.0674617	-0.0148738	0.706216
E2f7	-0.0161601	0.0228036	0.00275395	-0.000529353	-0.000393039	0.00990956	-0.0151682	0.705985
Slc31a1	-0.0185858	-0.00319698	0.0153026	-0.0229807	0.0101621	0.0724167	-0.0309646	0.705692
Sap18b	-0.0200608	-0.00683974	-0.0300924	-0.0266174	0.0260034	0.04452	0.0161579	0.705306
Sh2b1	-0.00994214	-0.00989186	-0.0310898	-0.00509021	-0.020629	0.0328892	-0.0170388	0.705148
Orc4	-0.0312243	-0.00908242	0.0150781	-0.0110591	0.0117499	0.0318106	-0.00270004	0.70477
Csrp2	0.0240881	0.00801405	-0.128612	0.021653	0.0602708	0.24598	-0.0141669	0.704487
Fbxo7	-0.0292594	-0.00519226	-0.00415903	-0.02556	0.0174739	0.021558	0.00560078	0.703735
Rgp1	-0.0336752	-0.0297497	0.0274251	-0.0638882	0.0148466	0.243454	-0.0223663	0.703599
Tmem159	-0.0325575	-0.000856342	-0.0233679	0.0249111	-0.00890159	0.0223427	0.0128443	0.703414
Tsc1	-0.0269778	-0.00152932	-0.0137506	0.00472615	0.0182912	0.00755205	-0.0132041	0.702826
Slc35b4	-0.0102681	-0.00974486	0.00734947	-0.014983	0.00897826	0.061721	-0.00892693	0.702673
Mapre2	-0.0420126	0.0643359	-0.0457599	-0.0022818	-0.0731923	0.0473374	-0.0292402	0.702516
BC030867	0.00693995	0.00521815	-0.0111601	0.000273202	0.00537898	0.0352665	-0.00166682	0.702508
Mad2l1	-0.00835034	0.000573919	0.00249416	-0.00403578	-0.00549929	0.0975872	-0.0468104	0.702499
Mef2c	-0.0108436	0.00610719	-0.0232749	0.031021	-0.0212292	0.058748	-0.0216254	0.702354
Bicd1	-0.0169011	0.0116088	-0.00050513	-0.0126548	-0.00510661	0.00369031	-0.0131415	0.701967
Arid4a	-0.0639801	3.95193e-05	-0.0531224	0.0488759	0.0138725	0.0377981	0.0224348	0.701884
Papola	-0.0172879	-0.0337702	-0.134013	-0.0705611	-0.0393708	0.269169	0.0268441	0.701668
Tle6	-0.0411155	-0.0155653	0.0144052	0.00314615	-0.0362608	0.0718346	-0.00712024	0.70143
Glb1	-0.0695839	0.013506	-0.00343996	0.0114169	-0.0347775	0.0100079	-0.0389483	0.701089
Rsrp1	-0.189788	0.0169199	0.0108998	-0.121834	0.115032	0.0918325	-0.129727	0.700532
Axin1	-0.0765364	-0.00426395	0.001372	0.0298079	0.0695005	0.0541332	0.0205518	0.700078
Tmed3	-0.0255686	-0.0226353	-0.0565746	-0.093653	-0.00898089	0.139658	-0.008708	0.700059
Sesn2	-0.0164339	-0.0160769	-0.00606401	-0.00535989	-0.0121652	0.0225038	-0.00500441	0.700041
1700008J07Rik	-0.0113787	0.00815711	0.0121949	0.00224007	0.00406222	0.0114425	6.48145e-05	0.699981
4930430F08Rik	-0.00607027	-0.00546104	-0.00692014	0.0198055	-0.00630738	0.0570641	-0.0152028	0.699805
Fancf	-0.00322806	0.00947426	-0.0065757	-0.0193612	0.00282326	0.0203664	-0.00752546	0.699043
Fam129a	-0.0227449	0.010512	-0.0365316	0.0154666	0.0177286	0.0154902	0.00261704	0.698715
Dennd4b	-0.00607696	-0.00210688	-0.0103631	0.0252272	0.00421611	0.0403751	-0.0100203	0.698592
Mcm8	-0.00635197	0.0133447	-0.00404727	-0.000371842	-0.0150532	0.014499	-0.00216009	0.698559
Relt	-0.00827263	0.000987906	-0.00749492	0.0134009	0.000409137	0.0108705	-0.00109766	0.698289
Kirrel	-0.0120992	0.0191814	-0.0630314	0.0225281	-0.020691	0.0497553	-0.0178117	0.698226
Ticrr	-0.00842805	0.0199495	-0.00332857	0.00940758	-0.00472598	0.0136726	-0.0138979	0.698129
Ndufs5	0.00639127	0.0357828	-0.0213113	0.00780886	-0.0222845	0.161128	-0.0810362	0.69807
1600012H06Rik	-0.0129672	0.00822131	-0.000923024	-0.0292152	-0.0067489	0.0349683	-0.0282749	0.697649
Rbbp9	-0.0137402	-0.00533492	-0.0118732	0.0136554	0.000694775	0.0133279	-0.00387689	0.697644
Zfp462	-0.018083	0.0130751	-0.013778	0.0357312	0.0398737	0.045787	-0.0271057	0.697348
Naaa	-0.00724984	0.000852887	-0.0266255	-0.0181904	0.00839004	0.0190767	-0.00457173	0.696994
Dus3l	-0.0239738	0.0292858	-0.0191597	0.00894727	-0.0159651	0.00924545	-0.0202589	0.696946
Birc5	-0.0135904	0.0801587	-0.120647	0.141386	0.0854766	0.363965	-0.237308	0.696938
Fbxo33	-0.0264567	-0.0129706	0.00330856	-0.00715847	-0.0190193	0.0219036	-0.0161533	0.69691
Kmt5a	-0.0256974	0.0213439	0.0229164	-0.00464841	-0.0594964	0.130945	-0.0376045	0.696768
Slc11a2	-0.00380425	-0.00301356	-0.0109644	-0.0113336	-0.00766194	0.0189059	-0.000485029	0.696763
Ube2m	0.00876533	0.0579533	0.00113063	-0.0284478	0.00279134	0.0696152	-0.00477517	0.696472
Psmd11	-0.075009	-0.0234998	0.0534952	-0.0556934	0.0010617	0.148138	-0.0591171	0.696419
Myo1e	-0.0846336	-0.052183	-0.11017	-0.0347477	0.0655583	0.0731184	0.000500982	0.696396
Aebp2	-0.012678	0.0141576	-0.06326	0.00732261	0.0225467	0.061955	-0.0588683	0.696328
Brca2	-0.0224286	0.0124765	0.0220269	0.00735556	-0.000875172	0.0376159	-0.025878	0.696187
Akap2	-0.0601756	0.0404804	-0.0345043	0.0310344	0.0311174	0.0108218	0.00112936	0.695996
Pex1	-0.000695452	-0.00293661	-0.00629684	0.00375335	-0.00189521	0.036981	-0.0132314	0.695959
Rpl6	-0.0487598	0.00692406	0.0209021	-0.00413226	-0.0743123	0.110696	-0.0299602	0.695306
Irak1	-0.0450602	0.0276245	-0.00772253	-0.0522258	-0.0269341	0.0148271	-0.0356432	0.695191
Mturn	-0.00944062	-0.0045954	-0.00317659	-0.00811272	-0.00185691	0.00111637	-0.0010615	0.695032
Rpl35	-0.068189	-0.0184614	0.00234731	-0.0654394	-0.118806	0.214002	-0.0864174	0.694893
B3glct	-0.0354916	0.00647849	0.0257797	0.000283636	-0.00473601	0.0343896	-0.0220956	0.694724
Apmap	-0.00715661	0.0092157	-0.00655704	-0.00664999	0.00712016	0.00513007	-0.00981649	0.694505
Nemf	-0.00635024	-0.0213605	-0.0422174	0.00862692	0.0337644	0.147787	-0.0596731	0.694428
Rab11fip3	-0.0409819	-0.00226803	0.00584818	0.00849786	0.00346518	0.010752	-0.00296529	0.694386
Clec4d	-0.0314308	-0.0177277	-0.0206698	-0.0409226	-0.042214	0.18108	0.0577592	0.694308
Usp25	-0.0119252	0.014915	0.00183596	0.0449549	0.0440133	0.0445628	0.00233279	0.694081
Tmem181a	-0.0350291	-0.0058156	0.01149	-0.010083	-0.00315649	0.0333214	0.0205458	0.694031
Ctbs	-0.0271584	0.00608983	0.00333805	0.0244637	-0.0124476	0.0245419	-0.0156447	0.693434
Pck2	-0.0296364	0.0244949	-0.0288978	-0.0149355	-0.0156559	-0.00376126	-0.0163725	0.693402
Ccnd3	-0.082544	-0.0458314	0.0162752	0.0251883	0.0358382	0.0986837	-0.049067	0.693397
Wipi1	-0.0077898	0.0243761	-0.0218253	0.0653232	0.0968046	0.0940758	0.0112814	0.693342
Vps45	-0.024666	0.0184833	-0.0269139	0.0121755	-0.0112246	0.00429424	-0.00895077	0.693022
Tsen54	-0.0285879	-0.00170959	-0.00568264	0.00830828	-0.00199574	0.00442788	0.00343994	0.692155
Nle1	-0.0305851	-0.0231618	-0.000345041	-0.0260766	0.00623686	0.0368972	-0.0216509	0.691874
Tinf2	-0.00746133	0.00257367	-0.0142905	-0.00541119	-5.61204e-05	0.000399493	-0.00969318	0.691862
2410089E03Rik	-0.0483591	0.000887297	-0.0506091	0.0146848	0.00168214	0.00358248	-0.00212617	0.691418
Gtf2h5	-0.130033	0.0448807	0.0527496	-0.011891	0.0036807	0.0408946	0.00485101	0.691139
Armcx5	-0.0124446	0.00869223	-0.0127347	-0.00216927	-0.0191861	0.00618182	-0.00676836	0.690892
Csnk1d	-0.0482545	0.0235333	0.01374	-0.0393699	-0.0127289	0.0401823	-0.063692	0.690793
Prdm2	-0.0349238	-0.042031	-0.0388718	-0.0104717	0.0240708	0.0606195	-0.0304187	0.690705
Kcnq1ot1	-0.0963431	-0.0519101	-0.0571124	0.0771173	0.125815	0.151249	-0.0284716	0.690637
Cit	-0.00784331	0.00387304	-0.00803316	0.0190437	-0.0100077	0.0591421	-0.0360136	0.690617
Gstz1	-0.030978	0.0100774	-0.0159902	-0.0438018	0.0325631	0.0273246	-0.00695883	0.69055
Pgd	-0.0545566	-0.000672775	-0.00522192	-0.0405005	-0.109862	0.141735	-0.0582351	0.690385
Dlst	-0.0571447	-0.0302523	0.01605	-0.00338179	-0.044667	0.107922	-0.0603747	0.690227
Pla2g12a	-0.0351972	-0.0522086	-0.115557	0.0459489	-0.0360935	0.223665	0.0341996	0.690071
Gchfr	-0.00325069	-0.0374951	-0.134273	0.0312007	-0.0444606	0.288908	-0.0203337	0.689968
Mtf1	-0.0146002	-0.00202454	0.00973346	-0.0200869	-0.0134684	0.0497384	-0.0190729	0.689964
Tmem88	-0.0175829	-0.00615855	0.00596718	0.00616789	-0.0110868	0.0226454	-0.00341608	0.689901
Pomt2	-0.0224779	-0.00696113	-0.000205387	-0.0206559	0.0118097	0.0172208	-0.00165464	0.68974
Ung	-0.024506	0.0101644	0.0294714	-0.0221998	-0.00887746	0.0547008	-0.00141407	0.689529
Crem	-0.0363972	-0.0183137	-0.00175641	-0.118433	0.0016627	0.245688	0.0327174	0.689527
Wrnip1	-0.00319446	0.0112383	-0.00273595	0.0115265	-0.0413663	0.147756	-0.0460159	0.689466
Spata5	-0.00398706	0.0157335	-0.013437	-0.0228788	0.00413521	0.0221692	-0.0146516	0.689385
Ivd	-0.0433224	0.000935566	0.00180387	0.00044717	0.00335609	0.00220978	-0.00774924	0.689376
Utp11	-0.132243	-0.00993413	-0.0161321	0.0209022	-0.0460759	0.0772393	0.0809835	0.688923
Usp24	-0.0179829	-0.0289895	-0.00683837	-0.0511516	-0.0111303	0.167485	-0.0166928	0.688876
Cog6	0.00459061	-0.0119202	-0.0393601	-0.00543536	-0.000480823	0.103638	-0.0161236	0.688622
Gfm1	-0.0219134	0.00636548	0.01864	-0.0226171	-0.0142729	0.0571764	-0.0327579	0.68846
Nipa1	-0.0288626	-0.00555953	-0.00613775	-0.0205697	-0.0160132	-0.0012169	-0.00340914	0.688427
Runx2	-0.0271299	-0.0272444	-0.0328624	0.0555071	-0.00491085	0.105775	-0.00704435	0.688409
Scn1b	-0.00171862	-0.00754373	-0.011696	0.00094332	0.000101598	0.0297681	-0.001002	0.688181
Nifk	-0.0260727	0.047362	-0.0233704	0.0244348	-0.0161614	0.0196005	-0.0109915	0.687942
Nudt19	-0.00359413	0.0490338	0.00074136	0.0315329	0.00856731	0.0289805	-0.00301329	0.687171
Rab9	-0.13713	0.00819129	0.0453928	0.028726	-0.0299663	0.0573863	0.00100148	0.686834
Tdp1	0.000757828	-0.00441307	-0.0192674	0.017382	-0.00879698	0.0635437	-0.0031326	0.686696
Snx5	-0.03433	-0.047435	-0.0657674	0.00336086	-0.069799	0.156132	-0.0527277	0.686683
Pqbp1	-0.0678492	-0.0482533	-0.00164973	0.0403368	-0.0652116	0.18166	0.0202622	0.6864
Slc25a33	-0.0711293	-0.0240886	0.00303212	0.0333439	0.0430832	0.0532917	-0.00471998	0.686142
Med4	-0.0125333	0.0373271	-0.0528566	0.0237813	-0.0158309	0.0361475	-0.00266305	0.685907
Hmgn5	-0.00719427	-0.0194738	-0.038566	-0.00752419	-0.063382	0.231072	-0.049872	0.685786
Rad51c	-0.0105022	0.00423332	0.0088838	-0.0141891	0.00238422	0.0190735	-0.00764362	0.685671
Bak1	-0.0806997	0.029902	0.0296965	-0.020263	-0.0188335	0.0223607	-0.0292016	0.685183
Mettl9	-0.0152712	0.0932025	0.00513366	-0.00147559	-0.0058948	0.0475693	-0.0135176	0.685075
Steap2	-0.0254015	-0.00985783	0.0164489	0.0273458	0.0573346	0.210576	-0.109263	0.685005
Pofut1	-0.00178176	0.0109165	-0.0166003	-0.0183405	-0.0109458	0.0249516	-0.000589918	0.684563
Trip4	-0.015446	-0.0172555	-0.00570225	-0.00852087	0.00285639	0.0258799	-0.01741	0.684414
Araf	-0.0476368	0.0169795	-0.0134724	0.00938514	0.00514004	-0.00258083	-0.00373063	0.684294
Eif1ax	-0.0367614	0.0308492	0.0476034	-0.0186028	-0.0659549	0.166679	-0.0570402	0.684259
Slc4a1ap	-0.0309578	0.0127669	-0.0179076	0.00593856	-0.0229165	0.00343548	0.00117097	0.684206
Id2	-0.0266786	0.0483543	-0.139694	-0.00989155	0.051446	0.0810743	-0.0753695	0.684056
Taf2	-0.023881	0.0237456	-0.0198376	-0.0186393	0.00772	0.00095999	-0.0120834	0.683933
Pds5a	-0.0412741	0.0183897	0.00709764	-0.00807285	-0.0454376	0.0299774	-0.00347028	0.683882
Lca5	-0.005931	-0.00258669	-0.00253139	0.0053886	0.0177219	0.0204662	-0.00590992	0.683297
Fem1b	-0.00850737	-0.00861538	-0.0198376	-0.0349604	-0.0135413	0.0629371	-0.0332519	0.683198
Naa16	-0.0080925	0.00309085	-0.0037044	-0.00895829	-0.0192798	0.0218574	-0.0146061	0.6827
Srsf5	-0.0169821	0.01289	-0.00160562	0.00570444	-0.0294981	0.0532935	-0.0445189	0.682535
Gm47283	-0.267272	0.0382785	0.138132	-0.248897	-0.128342	0.259204	-0.142706	0.682525
Cdpf1	-0.0228742	-0.0113515	0.0177198	-0.0199486	-0.00848555	0.0690873	0.00919978	0.682442
Gm4285	-0.0120611	-0.00283697	-0.011557	-0.00357031	0.00433307	0.00150712	0.00169321	0.682014
Csf3	-0.262152	0.101563	-0.333025	0.395393	0.435031	0.372245	0.0427963	0.681765
Tsen2	-0.0181516	-0.00935359	0.0152169	0.00693255	0.0050605	0.037621	-0.006008	0.681721
Flywch1	-0.132689	-0.0226351	-0.0182007	0.0429332	0.0230229	0.0294585	-0.000735139	0.681715
Cenpn	-0.0136599	0.0137686	0.00523208	0.0186058	-0.0294586	0.0635389	-0.0312522	0.681615
Fam162a	-0.0454582	-0.064822	-0.212297	0.0540571	0.15177	0.324754	-0.130734	0.681581
Rabl6	-0.0561353	-0.0105881	0.0113284	-0.00462596	-0.0560591	0.0540409	-0.0406898	0.681532
Six1	-0.0372575	0.00153533	0.00387002	-0.036809	0.0122262	0.0168521	-0.016117	0.681433
Klf5	-0.096004	-0.00561354	-0.176498	0.0940616	0.0291153	0.11884	0.0550123	0.68107
Atp5g3	-0.00961544	0.00902897	0.00415207	-0.0292926	-0.0668896	0.198332	0.0124102	0.680952
Ipo4	0.00438317	0.00400511	-0.0393972	-0.00849855	-0.0156789	0.0787159	0.0151498	0.68087
Rpl36al	-0.0248737	-0.00107707	-0.0942075	-0.174219	-0.078708	0.288558	-0.00571531	0.680867
Mrpl33	-0.0770968	0.101106	-0.0245818	-0.102076	-0.0775	0.0686657	0.0056451	0.680734
Eloc	-0.0484583	0.107729	-0.0759996	-0.00658322	0.00577698	0.0246208	-0.00788786	0.680701
Mthfd1	-0.00590057	0.0154094	-0.0149047	0.0170718	-0.0296703	0.0790624	-0.0464063	0.680445
Rapgef1	-0.0527852	0.0689085	-0.0468249	-0.0178394	0.00356159	0.00432896	-0.0442803	0.680078
Arhgef40	-0.0022861	0.00576388	-0.0453095	-0.00940574	-0.0101306	0.0344936	-0.0105535	0.680073
Hsph1	-0.0398554	0.00137718	0.049129	0.0126198	0.0556518	0.0793554	-0.00279275	0.67919
Tti1	-0.0239781	-0.00869832	-0.00608238	0.0211054	-0.0110951	0.0237379	-0.00881855	0.679103
Fbrsl1	-0.0304627	0.0143753	0.00184552	-0.0274506	0.0165585	0.0112818	-0.0125118	0.679022
Traf5	-0.00825349	0.0194274	-0.0265778	0.00906064	-0.019962	0.0209764	-0.0100581	0.678779
Wdr70	-0.0548227	-0.000156703	-0.119688	0.0200019	0.0765715	0.0979098	0.0614826	0.678666
Uap1l1	-0.0344389	-0.00850781	0.00518454	0.0505635	-0.0309543	0.0881907	-0.0142241	0.678635
Fkbp3	-0.0114105	0.0414448	-0.0102369	-0.0532773	-0.0893337	0.199934	-0.0768689	0.678448
Gm27029	-0.00285639	-0.00361546	0.00074219	0.00913701	-0.00973602	0.0464725	-0.00826572	0.67789
Pgs1	-0.0433526	0.0167204	-0.0632488	0.117554	0.0492107	0.132077	-0.0793691	0.67779
Colgalt1	-0.00309188	-0.0375986	-0.0244881	-0.0146874	-0.0251046	0.316946	-0.0861427	0.677786
Rpl19	-0.00950368	-0.0120377	-0.00107074	-0.0452936	-0.0333224	0.166395	-0.00588119	0.677469
Gopc	-0.0413006	0.0131716	-0.00566755	-0.02333	-0.0135183	-0.00539173	-0.0102429	0.677304
Ube2j1	-0.0263968	0.0128504	-0.0177236	0.015436	0.00400779	0.00760485	0.0138934	0.677252
Pcnx	-0.0018156	-0.0154125	-0.0270145	-0.00794343	0.00404549	0.0617819	-0.0146584	0.677228
Cyp2c55	-0.0348444	-0.00674744	-0.0156986	0.00542476	0.0133498	0.00273578	-0.00839436	0.677145
Emc7	-0.0172793	-0.00256465	-0.0778666	0.0383313	-0.0859998	0.170882	-0.0528647	0.676947
Ska3	-0.000307843	0.0232865	-0.0225986	-0.000741384	-0.0317873	0.0500862	-0.0174069	0.676814
Bbs4	-0.0236064	0.00390882	0.00390631	-0.0163898	-0.00413037	0.00328744	-0.0110485	0.676781
Slc25a22	-0.00593922	0.0083014	-0.00229142	0.0103098	-0.00344407	0.00793726	-0.00505035	0.676773
D10Wsu102e	-0.06242	-0.00258232	0.0441416	-0.102877	-0.0473511	0.174816	-0.0188396	0.676664
Asrgl1	-0.0153056	-0.0233776	0.0044402	0.0307897	-0.0221708	0.157357	-0.0316413	0.676598
Acsl6	-0.053442	-0.00766809	-0.00583362	-0.0105165	-0.0304747	0.017028	0.0161917	0.676597
Cad	0.00184965	-0.00127175	0.00415205	-0.00477151	-0.0106702	0.0862069	-0.0158687	0.676531
Ywhaq	-0.047727	0.0617725	0.0372861	-0.0358174	0.011309	0.0713426	-0.0741429	0.676468
Myo10	1.75399e-05	-0.00366305	-0.122756	-0.0609102	0.104058	0.197303	-0.0270824	0.676415
Chd1	-0.149934	-0.00699536	0.0180089	0.0236075	0.104135	0.0637843	-0.039918	0.676373
Anp32e	0.0424098	-0.00381637	-0.12178	-0.0640582	-0.0337417	0.405926	-0.0425892	0.676249
Yme1l1	-0.0771259	0.00659397	-0.0815512	-0.0155521	-0.0365302	0.017242	0.0409302	0.676128
Rps27	-0.0579333	0.0354953	-0.192046	-0.0139907	0.0403635	0.0785015	0.0237326	0.676079
Blvra	-0.031586	-0.0243941	-0.0120396	-0.00517399	-0.00318516	0.0308846	-0.0467865	0.675603
Eif3e	-0.0128824	-0.00472506	-0.220949	0.0131186	-0.0467644	0.236828	0.0286591	0.675334
Tgfbr2	-0.0427812	0.0128384	-0.0243969	-0.0304962	0.0564286	0.0307227	-0.0417645	0.675073
Psmb5	0.0169657	0.0123621	-0.143813	-0.0484548	0.0177351	0.193622	0.00667007	0.674953
Col4a5	-0.0268899	0.0148381	0.0043397	-0.0297021	-0.00502569	0.0114863	-0.00576475	0.674935
Cstf2	0.000445176	0.0101494	8.54513e-06	-0.0115895	0.00285469	0.0718385	-0.0412973	0.674862
Acat2	-0.0323774	-0.00951349	0.0203663	-0.0228272	-0.0461589	0.1006	-0.0215487	0.674705
Coq5	-0.039931	-0.00444679	-0.00993383	0.0319137	-0.0575287	0.0731386	0.000186245	0.674416
Epn1	-0.014286	-0.0129731	-0.000486521	-0.0161653	0.041655	0.064547	0.00300671	0.67372
Cpt1a	-0.0217881	-0.00861858	0.033789	0.000682735	-0.0128562	0.107644	-0.0253504	0.673651
Acp5	-0.0473138	0.0167989	-0.00129255	-0.048494	-0.0968782	0.10403	-0.0602361	0.673482
Nup54	-0.0553898	0.0478951	0.0260764	0.025776	-0.0150052	0.0296659	-0.0215885	0.673375
Hspa4l	-0.0876841	-0.0537038	-0.102215	-0.0258043	-0.0530577	0.100217	0.0675969	0.673176
Smarcad1	0.00527746	0.00162702	-0.0132186	0.0277945	-0.0151193	0.0881906	-0.00761011	0.673124
Slc15a4	-0.0150017	-0.0142663	-0.00595479	0.0201951	0.00243867	0.0414024	-0.0158113	0.672985
Padi4	-0.183069	0.00272263	-0.00907033	-0.176612	-0.0552062	0.0929287	0.064625	0.67276
Ints6	-0.0856217	0.0248157	-0.0454249	0.041385	0.0490977	0.017746	0.0171932	0.67265
Dmap1	-0.000151839	0.0148898	-0.00442492	0.0290416	-0.00827736	0.0548217	-0.0237474	0.672443
Pfkl	-0.0492806	-0.0551712	-0.0319366	-0.0436632	-0.00943822	0.094658	-0.095648	0.672201
Lrig2	-0.0251262	0.033894	-0.016832	-0.00549283	-0.00886858	0.00212256	-0.0158754	0.672199
Bpgm	-0.00573859	-0.0295248	0.00673092	9.44861e-05	-0.0153408	0.207817	-0.0265522	0.67149
Mybl2	-0.0222911	0.0273147	0.00190534	-0.0164219	-0.0299247	0.0232904	-0.0216618	0.671447
Acsl1	-0.0117828	-0.0196103	-0.000303985	0.0179934	-0.00341352	0.0862991	-0.0246	0.671126
Zfyve21	-0.0339736	0.0112352	-0.0907331	0.0524744	0.0324778	0.0570065	-0.0150228	0.670873
AI606181	0.00044695	-0.000234824	0.00055729	0.00125917	-0.000951095	0.0214809	-0.00767901	0.670741
Trmt61a	0.000575667	0.00704543	-0.0133727	-0.00595185	-0.0188359	0.0341427	-0.00451399	0.670715
Exosc2	-0.0503553	0.0321136	0.040763	0.00585851	-0.036047	0.0724541	-0.0554739	0.670404
Ppa2	0.0174662	-0.00477405	-0.0328854	0.0124489	0.0395641	0.1205	-0.00755642	0.670371
Plod1	-0.0583564	0.0154262	-0.0236933	-0.0078976	0.0607707	0.0179585	-0.0299707	0.670289
Myo19	-0.017955	-0.00469623	0.00658518	-0.0196034	-0.0102857	0.0209028	-0.00621536	0.670014
Eva1b	-0.121247	0.0267805	-0.000487869	0.02927	0.0618407	0.0210603	0.0101771	0.669705
B4galt5	-0.0300623	-0.0181304	-0.0469325	0.0552505	-0.0454359	0.104264	-0.00891612	0.669431
Lrp12	-0.0111832	-0.0133636	-5.1063e-05	-0.000896618	-0.0201215	0.0617102	-0.0149824	0.669318
Traf7	-0.108037	-0.0319629	0.0345838	0.0154	-0.0109809	0.0759538	0.0269451	0.669288
Rfx7	-0.000668211	-0.00774202	-0.020247	-0.00894366	-0.0145265	0.0583277	-0.0222107	0.669262
U2af1l4	-0.00905207	0.0135221	-0.00910363	-0.0276711	-0.0105108	0.0225345	0.00415912	0.669022
Eng	-0.0912093	0.0146045	0.0128914	0.0220504	-0.0231085	0.02444	0.020172	0.668802
Oxr1	-0.0232432	0.0222462	-0.0514839	0.0684338	-0.0360338	0.0784983	-0.0212695	0.668647
Tbp	-0.0357251	-0.000571478	0.0102983	0.00802977	0.000232498	0.01146	-0.0127363	0.668637
Taf4b	-0.0140996	-0.0110786	0.00925003	-0.0572776	-0.0262403	0.155553	-0.00601238	0.66834
Lrrc42	-0.065058	0.000680951	0.0149932	-0.0508211	0.0576894	0.0503068	-0.0237491	0.668153
Atp1b1	-0.020062	0.00392815	-0.0312968	0.040496	0.00312715	0.0327173	-0.00388814	0.668114
Dus2	-0.0175419	0.00309902	0.00483322	0.00776877	-0.0258318	0.031832	-0.0154347	0.668081
Zfp316	-0.0349031	0.0115669	-0.0191343	0.0288098	-0.0179435	0.0126389	-0.00505067	0.667647
Kdm6bos	-0.0139656	-0.0047454	0.00806533	-0.00110875	0.0175131	0.0220859	-0.00593282	0.667297
Eif3g	-0.070186	-0.0360397	0.0048146	0.0408375	-0.0357768	0.0820287	-0.0468661	0.667252
Zgrf1	-0.00773246	0.00651232	0.00973718	-0.0200235	-0.00414796	0.0312926	-0.0012601	0.667005
Asb8	-0.0131909	-0.00550479	0.00872202	-0.0120664	-0.0110943	0.0306786	-0.00562212	0.666858
Farp2	-0.00609207	0.00405215	-0.0046066	-0.0152492	0.0155291	0.0219717	0.0108599	0.666496
Rbsn	-0.0154816	0.0133087	-0.00600609	0.0201421	-0.00132015	0.00913493	-0.00418423	0.666287
Sipa1l2	-0.0113223	0.014224	0.00207381	-0.0156437	-0.0115941	0.0143672	-0.0147824	0.666274
Nudc	-0.0735035	0.0316362	0.0219385	0.0300928	0.0626809	0.0353001	-0.0290106	0.666161
Paxip1	-0.0157606	0.0313244	0.00101495	-0.0230055	0.00603194	0.0155673	-0.0123822	0.666024
Trim13	-0.00905816	0.00485526	-0.0028237	-0.0106279	0.0011195	0.00562723	0.00632978	0.665941
Gm26545	-0.0112031	-0.00279411	-0.00976583	0.00963829	0.012904	0.0116651	-0.00757872	0.665524
Plpp1	-0.0203432	0.00747679	0.00205108	0.0177329	-0.0205562	0.0216752	-0.00762182	0.665468
Gnai3	-0.000564312	-0.0118172	-0.022193	0.00235836	-0.0206149	0.0842119	0.00398879	0.665458
Soat1	-0.0519266	-0.100529	-0.118893	0.0649955	0.045355	0.24252	-0.0054999	0.665224
Tst	-0.0282732	0.0233766	-0.0279236	0.0370969	0.0207177	0.0226242	-0.0292283	0.665027
Snrpb	-0.080651	0.0318049	-0.0174926	0.0625612	-0.0941849	0.0753886	-0.00457495	0.664982
Ppp2r5a	-0.0398337	-0.0100789	-0.0249954	0.0347513	0.0176012	0.0244357	-0.00793191	0.664693
Kif15	-0.0208145	0.0240815	-0.0342854	0.0340645	-0.0270096	0.038375	-0.0379789	0.664589
Ttll7	-0.0985134	-0.0422404	-0.0390709	-0.124152	-0.123746	0.179038	0.0460356	0.664553
Il7	-0.0133526	0.0105561	-0.0194978	0.0401187	-0.00603686	0.0357429	-0.011497	0.664524
Kat14	-0.0217997	-0.00783848	0.00725483	-0.010797	-0.0178948	0.0277801	-0.0244168	0.664509
Chic2	-0.0844463	-0.00754028	0.00145265	0.0109164	0.144185	0.0996903	0.00737218	0.664491
Sptssa	-0.0603257	-0.047515	0.0193252	-0.0747322	-0.0362697	0.153025	-0.0692376	0.66433
Tbl3	-0.0333255	-0.00879741	0.0137872	0.00151318	-0.0267285	0.0358267	-0.0135299	0.664133
Ufsp2	-0.0169151	-0.0610088	-2.64578e-06	-0.0297787	-0.0351541	0.347615	-0.0694048	0.664098
Ace	-0.0320069	-0.070784	-0.198587	-0.0995413	-0.190785	0.406016	-0.0533373	0.663856
Nop56	-0.0541115	0.00380008	-0.0357468	0.10734	-0.089337	0.17617	-0.0688164	0.663706
Mrps17	-0.0546184	0.0142624	-0.036179	0.0513691	-0.0426526	0.0452443	0.0236024	0.663682
Ndufa1	-0.0420579	-0.043865	0.0157222	-0.115981	-0.0429162	0.296069	-0.0895685	0.663342
Prps1	-0.0306848	-0.0171991	0.0425311	0.0230201	0.0107165	0.0994205	-0.00391046	0.663286
Ficd	-0.0108817	-0.00258856	-0.00157663	0.00305036	0.00803324	0.00789962	0.00669268	0.663059
Surf2	-0.0121811	-0.0244878	-0.0132895	0.0544871	-0.0578607	0.229919	-0.0349491	0.66293
Trmt11	-0.0273712	-0.0101028	0.00263646	-0.0115398	-0.00701089	0.00565434	-0.00369878	0.66246
Dclre1b	-0.000947871	0.00526979	-0.0054182	0.00257106	-7.00889e-05	0.00337568	-0.00111336	0.662112
Rps7	-0.06357	-0.0907295	-0.023289	-0.132648	-0.100419	0.369996	-0.119521	0.661937
Trim47	-0.134464	0.0757633	0.0433475	0.105263	-0.0148984	0.0639302	-0.0122459	0.661897
Serp2	-0.0114921	0.0176739	-0.011502	0.0397635	-0.00723641	0.0349272	-0.0134561	0.66186
Capzb	-0.0526134	0.0106524	0.00795353	-0.0996858	0.0252198	0.0762284	-0.0506507	0.66183
2410131K14Rik	-0.0347471	-0.00841221	0.0104269	0.00581755	0.0203464	0.0219088	-0.0113826	0.661813
Mis12	-0.0281764	-0.0101847	-0.000607189	0.0572357	-0.0373307	0.107833	-0.0199728	0.661548
Pkp4	-0.00937825	-0.0151162	0.00636418	0.0265048	-0.0111081	0.0992351	-0.0204266	0.661424
Cryz	-0.0225688	-0.046428	-0.0402536	0.0308146	0.0253574	0.11395	-0.0168653	0.661391
Pex13	-0.0558812	0.0150938	0.00772444	0.0423252	0.00887283	0.0416485	-0.0608828	0.661144
Rbp2	-0.0760407	-0.00991923	-0.162265	0.259921	-0.145311	0.40455	-0.0202519	0.661053
Pgm1	0.000122163	0.0718433	-0.0448428	-0.0525374	-0.014635	0.0740877	-0.0501023	0.660926
Ptges	-0.214856	0.118097	-0.202128	-0.104346	0.207429	0.0577978	0.057579	0.660574
Rpl34	-0.0251099	0.0240892	-0.236293	-0.0557982	0.0294392	0.16547	0.0424763	0.66054
Fam206a	-0.00978343	-0.0120286	-0.0017853	0.0138247	-0.000388125	0.0364093	-0.0112983	0.660079
Ddx1	0.00246869	-0.00375102	-0.083824	-0.0299072	-0.0517607	0.148004	-0.0781528	0.660041
Zfp110	-0.00974523	0.000636238	-0.027913	0.0247332	0.010696	0.0274965	-0.0101178	0.659472
Uhrf1	-0.0157569	0.0285709	0.0138459	0.0173998	-0.0612264	0.10707	-0.0333172	0.659461
Rps24	0.00680062	0.0580639	-0.265603	0.0265755	0.0826004	0.220793	-0.00274262	0.659388
Zc3h15	-0.0697412	0.0453088	-0.0281461	0.0889916	-0.0344758	0.0595183	-0.0640118	0.659344
Vrk1	-0.0127833	0.00609655	-0.0694673	0.0624063	0.0354965	0.0829849	-0.0249945	0.659239
Neil3	-0.0126594	0.0081287	0.000314677	0.00337717	-0.014793	0.0308963	-0.0348269	0.659177
Prps2	0.00185818	0.0247064	-0.011153	0.0121708	-0.00879185	0.0339945	-0.0230263	0.658942
Ppp2r2a	-0.0207055	0.0383769	-0.10621	0.064985	0.00853813	0.0721788	-0.0199731	0.658648
Rilpl1	-0.0660567	-0.00567794	0.0175896	0.00873949	0.0411635	0.0302145	-0.0144189	0.658545
Cdk9	-0.0375985	-0.0389103	0.00622324	0.0172204	0.0309147	0.11919	-0.0644913	0.658396
Ssb	-0.0597653	-0.0227673	0.0153331	0.050346	-0.028665	0.109288	-0.0729797	0.658391
Sgcb	-0.0577014	-0.0231521	0.0203041	-0.0485545	-0.0539803	0.0775171	-0.0377304	0.658268
Setdb1	-0.0438377	9.54996e-05	-0.0359375	-0.000303526	0.0136286	0.0357632	0.0527916	0.658233
Ppp1r13l	-0.0143317	-0.0108842	-0.00671912	-0.00793501	0.0169454	0.0193921	-0.0131029	0.658174
Nol10	-0.029185	-0.00904161	0.0217701	-0.0207726	-0.00251804	0.0422605	-0.0165334	0.658135
Rrm1	0.00677178	0.0252056	-0.00517321	-0.00381171	-0.0340798	0.101201	-0.0404482	0.657915
Rbm12	-0.00501644	0.00910526	0.0029083	-0.00863077	0.00172721	0.00717051	0.00131826	0.657895
Col1a1	-0.109632	-0.0533619	0.0255876	-0.102747	-0.074111	0.210129	0.0655196	0.657783
Gtf2e1	0.0172697	-0.0121819	-0.0111939	-0.0050448	0.00837715	0.161822	-0.0181289	0.657623
Cisd3	-0.0102475	0.0621003	-0.0296234	0.00669797	-0.033752	0.0409728	-0.0240277	0.657598
Kpna3	0.0289636	0.07504	-0.097718	0.00981997	-0.0210302	0.130179	-0.0299794	0.657573
2006-03-01	-0.0172018	0.00658908	-0.0461469	0.0143934	0.0233428	0.0220591	-0.00281515	0.65743
Spsb1	-0.012594	-0.0439622	-0.0145095	0.0063442	-0.0148952	0.162702	0.00427009	0.65725
Mark3	0.000806545	0.00026283	-0.11758	-0.0252973	-0.0080428	0.104197	-0.011245	0.656938
Rpl32	0.021668	-0.0189782	-0.0725361	-0.0710112	0.0060041	0.310154	-0.117341	0.656669
Dph3	0.0124325	-0.0217572	-0.0235522	-0.085558	-0.0665508	0.377343	-0.0182161	0.656093
Sec24d	-0.0172303	0.0101769	-0.0742627	0.0334915	-0.0307933	0.0800926	0.0363197	0.655941
Utp6	-0.0202181	0.00726469	0.0121015	0.0099784	0.0117333	0.0129006	0.0108164	0.655454
AC160336.1	-0.455585	0.185607	-0.0401345	0.226012	-0.416937	0.208216	-0.1926	0.655357
Gm39469	0.00317486	-0.000398208	-0.0164269	0.00913967	-0.0185238	0.0589256	-0.0116081	0.655167
Psmd6	-0.0159828	0.0726862	-0.176311	0.0301971	-0.0102547	0.100257	0.000550341	0.655092
Rbm14	-0.018866	-0.00457817	0.0158301	0.00164187	0.005737	0.0238059	-0.00853326	0.654954
Rab10	-0.0255726	-0.0206509	-0.0241372	-0.0100066	-0.0210666	0.109821	-0.102609	0.65448
Tnfaip1	-0.0230761	-0.0024367	0.00992931	0.0190999	0.0419993	0.0562366	-0.0369926	0.654267
Sart3	-0.0254743	0.00538093	-0.0109158	-0.00407526	-0.010328	0.00844439	-0.0442698	0.654262
Nadk2	-0.0463802	-0.00664389	-0.0628633	0.0493543	0.0137268	0.0335044	-0.0109231	0.653786
S100pbp	-0.0235864	0.0112619	-0.0103523	-0.00115932	-0.00965982	-0.00371224	-0.0209712	0.653751
Spryd4	-0.00829254	0.0031067	-0.00287145	0.00200672	-0.0133581	0.0124391	0.00600818	0.653729
Golga5	-0.071094	-0.00621154	-0.00179812	-0.0193303	0.000976418	-0.00281171	-0.00244707	0.65358
Tpd52l1	-0.0729269	-0.0543709	-0.00557214	-0.0513429	-0.0318183	0.03488	-0.0201612	0.653512
2310022B05Rik	-0.00826015	0.00853086	-0.00989148	-0.028776	-0.0145892	0.059126	-0.0546564	0.653148
Gatad2b	-0.0268777	0.00734421	-0.0452365	-0.0121519	-0.0190506	0.000924453	0.00368839	0.653118
Scfd2	-0.0142171	-0.000455406	-0.00356178	-0.0158344	0.00339287	0.00158987	-0.00741912	0.652732
Lonp1	-0.00714633	-0.00583859	-0.0087689	0.0186346	0.00522546	0.0718225	-0.0480462	0.652224
Edil3	-0.00812462	0.0116107	0.00164435	0.0137599	0.00935456	0.00979938	-0.00855405	0.651898
Kat7	-0.0372978	0.0207127	-0.0146225	0.0238606	-0.0580877	0.0395215	-0.00408314	0.651791
Stxbp1	-0.049864	0.0273305	-0.00271529	0.057788	0.0409253	0.0368591	-0.0380829	0.651754
Capns1	-0.0184649	0.0207894	-0.0165833	0.00420815	0.102865	0.0857582	0.0631973	0.651632
Ergic2	-0.0513866	-0.00831085	0.0360648	-0.0011894	-0.0110539	0.0470758	-0.00705896	0.65114
Dnajc24	-0.0423803	0.00761148	-0.00375232	-0.0306541	-0.0522748	0.0430814	0.0211426	0.65107
Ubac2	-0.016816	-0.0131165	-0.000950272	0.0139715	-0.0370415	0.0761362	-0.0123286	0.65093
Zswim8	-0.0484154	0.03616	-0.0869311	0.018487	0.0265235	0.0141329	0.00147371	0.650857
Hacl1	0.00850578	0.00898728	-0.0139254	0.00157117	0.0184456	0.03037	-0.000994275	0.65058
Dhx35	-0.00306018	0.00885636	-0.00334514	0.00859684	-0.00796368	0.0113471	-0.00552058	0.649399
Babam2	-0.026112	0.0740802	-0.0361572	0.00845837	-0.0730773	0.057635	-0.02907	0.64938
Slc22a4	-0.0145551	-0.00606383	-0.00835058	-0.0142444	-0.0170128	0.0180812	0.00850132	0.649321
Ylpm1	-0.0472786	0.000445054	0.0253959	-0.0420263	0.0159161	0.0386828	-0.0247886	0.649283
Bms1	-0.0545429	-0.0193635	0.000553383	-0.023698	0.117093	0.106367	-0.0293033	0.649213
Elovl1	-0.0483733	-0.0331363	0.0518638	-0.0813337	-0.0073327	0.2017	-0.0534072	0.648762
Acot9	-0.0532387	-0.00769591	0.005342	0.00272935	-0.0449276	0.0241614	-0.0381639	0.64876
Slc1a5	-0.0156113	0.0253798	0.00760772	-0.032355	-0.0412976	0.0585643	-0.00124944	0.648713
Coq4	-0.0269215	0.00631632	0.014131	-0.00859095	-0.015869	0.0276318	0.0185059	0.648678
Nlgn2	-0.063457	-0.011515	0.0034632	-0.00010453	0.0414695	0.0248164	0.00808566	0.64852
Anapc5	-0.0170499	-0.0335251	0.02477	0.0698286	0.0249172	0.192909	-0.0399339	0.648099
Brap	-0.024361	-0.00179896	-0.0109295	-0.00736561	0.0280259	0.0109741	-0.0122452	0.647809
Myo6	-0.0593684	-0.0414174	-0.0124452	0.0244389	-0.0569208	0.101441	0.0252611	0.647587
Gclm	-0.0269489	-0.0433045	-0.0704843	-0.060713	-0.126501	0.224004	-0.073011	0.647168
Kdm6b	-0.256869	0.0103598	-0.126351	0.193977	0.136728	0.106639	0.0870053	0.647141
Nfkbia	-0.537419	0.101293	-0.360909	0.348087	0.355466	0.171776	0.163425	0.647028
Rps6kb1	0.0188632	0.013859	0.00322536	0.0156533	0.00571632	0.0874825	-0.0207103	0.646986
Lsm5	-0.0285689	0.0274978	-0.0241613	-0.00921741	-0.0885602	0.112013	-0.101314	0.646887
Lin52	-0.00713847	-0.000137964	-0.00218239	-0.00322169	-0.00944068	0.0015243	-0.00407432	0.646862
Dclk1	0.0142287	0.0121102	-0.0407318	-0.0105119	0.0226155	0.0641052	-0.00679701	0.646809
Rap1gds1	0.0166456	-0.00962517	-0.0207581	0.0155085	-0.00863317	0.146468	-0.0262353	0.646594
Bola3	0.0105972	-0.0204608	-0.0143154	-0.0295094	0.0312027	0.148342	0.00356028	0.645252
Rps4x	-0.0425391	-0.0534169	0.0279322	-0.0043031	0.00336904	0.145464	-0.0362276	0.645016
Helb	-0.0216451	0.033602	-0.0240853	-0.0186961	-0.0367393	0.0194683	0.006177	0.644608
Mbd5	-0.00729337	0.0189608	-0.028154	0.0140226	-0.0378977	0.0405548	-0.00995172	0.644529
Mest	-0.0177396	-0.0108081	0.00785232	-0.0142108	-0.0284548	0.0530961	-0.00741886	0.64426
Skp2	-0.0125614	0.0405951	-0.0116018	0.00604741	-0.0240198	0.0269173	-0.0307987	0.64411
AC127341.3	-0.133336	-0.0233445	-0.00049056	0.0772043	-0.0494308	0.0614	-0.00109975	0.643786
Vps37b	-0.110678	0.00280769	0.0837454	-0.0829086	-0.00384365	0.106675	-0.0223811	0.643609
M6pr	-0.0316736	0.0186708	-0.0501514	-0.0183641	0.0126673	0.0154769	-0.0724034	0.643475
Urgcp	-0.0247195	-0.00775492	-0.00925254	-0.00839127	0.0518727	0.0403459	0.0094465	0.643133
Cd14	0.0435373	0.0123393	-0.0744695	-0.0514169	-0.0220977	0.247174	-0.0324159	0.643002
Peak1	-0.0909461	-0.0244527	-0.0105976	-0.128317	0.107477	0.1168	-0.0404801	0.642998
Atp5h	-0.018486	-0.0331584	0.0282203	-0.0733766	0.00550003	0.213938	-0.0362189	0.642674
Pgm3	-0.0139988	-4.68872e-05	0.000479048	0.00600642	0.00402803	0.00823376	-0.0166639	0.642337
Aldh3a2	-0.0360024	-5.90125e-05	0.00839002	0.0111383	-0.060625	0.071333	-0.0412437	0.642317
Ccnf	-0.0285117	0.00304129	-0.0163386	0.00690026	-0.0312265	0.00401604	-0.0170281	0.642308
Atxn7l3	-0.0361634	-0.0160883	-0.024345	-0.0360162	0.00631179	-0.00468192	-0.0268574	0.642206
Slbp	-0.10542	0.0619077	0.0281488	0.113097	-0.0446677	0.0984762	-0.0983897	0.642189
Haus6	-0.0125147	0.00380084	-0.00992182	-0.0188363	-0.0233003	0.0131585	-0.0256113	0.642004
Pdlim7	-0.0374854	0.0703095	-0.0548817	0.037939	-0.0843999	0.062351	-0.00878738	0.641925
Psmd3	-0.0493967	-0.0244765	0.0580553	-0.0633234	-0.0250361	0.174109	-0.0493074	0.64188
Esd	-0.0167606	0.0447382	-0.255374	0.0774902	0.119429	0.190914	-0.0359721	0.641525
E530011L22Rik	-0.0145491	0.00725297	0.00509209	-0.00809744	-0.00128278	0.0028194	-0.0057788	0.641173
Etfrf1	-0.0395472	0.00293374	-0.0013754	0.0464259	0.0040538	0.0276304	-0.0115413	0.64113
Ncdn	-0.0153224	-0.00582646	0.0110749	-0.010095	-0.00516863	0.0213383	-0.00355749	0.641107
Jarid2	-0.0178935	0.00622008	-0.0169922	0.0480091	-0.00240919	0.0374457	0.00489359	0.640789
Pcif1	-0.0363647	-0.0187837	0.014797	0.00988571	-0.00588431	0.0792387	-0.0689767	0.640299
Tbc1d24	-0.0269821	-0.00358701	0.00865904	0.0255049	-0.008896	0.0267886	-0.00133551	0.639875
Kti12	-0.0264528	0.0188857	0.00526646	0.044832	-0.00775224	0.0293161	0.00666745	0.639692
Snx9	-0.0502333	-0.0117742	-0.0769442	0.0786846	0.00962354	0.0635508	-0.00235319	0.639541
Axl	-0.0631678	0.0325921	0.0418304	-0.013493	-0.0349394	0.0811864	-0.102009	0.63937
Magi3	-0.0041841	0.0223635	-0.0455127	-0.0023029	-0.0188059	0.0295133	-0.0343359	0.639353
Leng1	-0.0110506	0.0035593	-0.0240158	0.039972	-0.00381445	0.0397467	-0.0158743	0.639245
Irf2bp2	-0.0642441	-0.0311854	-0.00585574	-0.0672822	0.029884	0.0391343	-0.0444412	0.639238
Tex261	-0.0276011	-0.00139141	0.0117194	0.0507808	-0.0575801	0.116328	-0.0169937	0.639127
Cxcl14	-0.0481228	-0.0688162	-0.041403	-0.0773963	-0.0375494	0.152622	0.0262424	0.638677
Shq1	-0.0344121	0.0367011	0.0150481	0.0083831	-0.00814118	0.0158953	-0.0270136	0.638237
Haspin	-0.0111651	0.0096212	0.00476876	-0.00361759	-0.0208884	0.0185839	-0.00798277	0.638092
Akt1	0.0255382	0.0332313	-0.117749	-0.023842	-0.0615909	0.171526	-0.0077879	0.638007
Emc2	-0.0244461	-0.0188884	-0.0640806	0.0921483	0.0125048	0.139465	-0.0766747	0.637743
Asl	-0.00848119	-0.0190024	-0.0432408	0.0836427	0.000667474	0.14617	-0.0433424	0.637671
Bub1	-0.0245923	0.0412308	-0.0519294	-0.00165697	-0.0651201	0.0411747	-0.0586974	0.637605
Rpgr	-0.0147753	-0.00398373	0.00667016	-0.00657988	-0.0129258	0.0167788	0.000803023	0.637486
Tpi1	-0.0213882	-0.0910274	-0.0530546	-0.00275853	-0.0551952	0.416088	-0.195927	0.637445
Bvht	-0.0137478	-0.00893088	-0.0178382	0.023435	-0.00845335	0.0293527	-0.0167126	0.637259
Nup188	-0.0220676	0.00422674	0.000532447	-0.00231374	-0.0315064	0.016431	-0.0155268	0.63705
Ndufb11	-0.0276021	-0.0374324	-0.0137861	-0.019079	-0.0429247	0.240298	-0.161615	0.636855
L3mbtl2	-0.010101	-0.00859996	0.0040689	0.000284662	-0.00685234	0.0185996	-0.00505204	0.636739
Gdpd1	-0.0198534	-0.00508572	0.00345464	-0.0191362	-0.0226705	0.0183514	-0.00789341	0.636475
Csde1	0.0339156	-0.0148093	-0.0926782	-0.0439243	-0.00935243	0.230695	-0.0342108	0.636386
Hdac8	-0.0121116	-0.00522712	-0.0156055	0.00683117	0.0671526	0.062472	-0.014685	0.636161
Cdc42bpb	-0.00294745	-0.00491044	-0.0992078	0.00847339	0.00895795	0.0767713	-0.0305761	0.636049
Mdh1	-0.0148249	-0.0320685	-0.005737	0.0686651	0.0252282	0.20614	-0.0982071	0.635575
Zgpat	-0.0188632	-0.0110878	0.0143132	0.00595017	0.0233789	0.0409062	-0.0171802	0.635388
Tra2b	-0.183321	0.0464234	-0.0545675	0.0931032	0.101029	0.0206178	-0.00653198	0.635094
Prr3	-0.0143307	0.00717359	-0.0183215	-0.00858541	0.0429744	0.0241199	-0.00405287	0.634062
Rnps1	-0.212807	-0.015558	0.107384	0.0736391	0.0110439	0.114452	-0.0372004	0.634031
Suclg2	0.00295814	-0.0361237	-0.0125489	-0.000532121	-0.0193395	0.215418	-0.0721186	0.633592
Zc3h11a	-0.0130243	0.000647286	0.0022062	0.00361009	0.0076083	0.00355895	-0.00340457	0.633586
Meaf6	-0.0714438	-0.0344186	0.057185	-0.0319701	0.00643336	0.111401	0.017019	0.633514
Ap4b1	0.000274474	-0.0023122	-0.0114381	0.0111738	-0.0105336	0.039098	-0.0172726	0.633498
Jag2	0.00888867	0.0142659	-0.00199545	0.00221551	0.0310786	0.0612309	-0.0330315	0.633339
Zmat5	0.0065186	0.00773495	0.00211512	0.0284285	-0.0188862	0.0832413	-0.0184354	0.633261
Tuba1c	-0.064451	-0.0551901	-0.16423	-0.0146646	0.086196	0.194085	0.125523	0.633077
Alkbh3	-0.0126212	0.0157637	-0.0217661	0.0407403	-0.0173422	0.050476	-0.0420541	0.633029
Lrrcc1	-0.0479489	-0.0107906	-0.00649486	0.0424653	0.0257173	0.0328602	0.012956	0.632745
Gphn	0.00296619	-0.00637891	-0.0132836	-0.00912758	0.000401427	0.0748958	-0.0430037	0.632357
Mcrip2	-0.0271197	0.022906	-0.00201858	-0.028494	-0.0139259	0.00522296	-0.0048192	0.632054
Dapp1	-0.00962752	0.00512075	-0.00903237	0.0165588	-0.0248025	0.0288731	-0.000286173	0.632021
Aldoc	-0.0812772	-0.0412968	-0.0255305	0.110295	0.0333469	0.112624	-0.0595604	0.631928
Ccdc22	-0.0427644	0.00738176	-0.0161998	0.035464	-0.00168645	0.010133	-0.02299	0.631833
Areg	-0.0392094	-0.16555	-0.487546	-0.181326	0.0414898	0.567731	0.0827391	0.631648
Ccne2	-0.00282243	-0.0035882	0.00278098	-0.0193452	-0.00916723	0.0466347	-0.0154388	0.631504
Marcks	-0.0718666	-0.0332167	-0.0097105	0.0287315	-0.116592	0.123216	-0.0489542	0.631409
Pmp22	-0.0177754	-0.00543669	-0.0481604	0.0166896	-0.0159402	0.0296388	0.00930801	0.630856
Ydjc	-0.00341812	0.0123718	-0.00927328	0.0215507	0.011709	0.018021	-0.0114844	0.630691
Dgcr14	-0.0106412	-0.00357042	0.00905151	-0.00860778	-0.00484699	0.0215523	-0.0137998	0.630679
2007-03-01	-0.0978203	0.0259134	-0.0166078	0.0187278	-0.0653515	-0.00118618	-0.0472888	0.630608
Ints7	-0.0189729	-0.00113345	0.0108216	0.0104151	-0.0157484	0.0245858	-0.0130078	0.630434
Sec22b	0.0118487	-0.0183899	-0.038037	0.0549294	-0.00402687	0.154443	-0.0260559	0.630367
Med17	-0.0801545	0.0110228	-0.00168854	-0.0152193	-0.0250797	0.0217466	0.047445	0.630249
Creg1	-0.0204795	-0.037071	-0.0353469	0.0483643	-0.00483055	0.0975723	-0.0219527	0.629943
Ints2	-0.0295485	-0.00112148	0.0143217	-0.013153	0.0196201	0.0177981	-0.0090285	0.629608
Hhip	-0.0649703	-0.131466	0.0264843	0.0290286	-0.0553417	0.472692	-0.1807	0.629442
Wars	-0.0292383	0.0018055	-0.0203078	-0.0133562	-0.0718915	0.0445538	-0.0259864	0.62941
Cct3	0.0244455	0.00941147	-0.0462865	0.0499552	-0.0345241	0.168285	-0.0333819	0.629314
Abhd11	-0.0261383	-0.0370667	0.0617822	0.0153701	-0.0357318	0.246794	-0.0413773	0.629161
Me1	-0.0352029	-0.0261835	-0.000151291	-0.077089	-0.0327788	0.0868227	-0.0160026	0.628567
Acat1	-0.115512	0.0619984	0.0301214	0.0323405	0.0126663	0.0157005	-0.0534891	0.628181
Eif2s1	0.00208858	-0.0424885	0.0124529	-0.0573701	-0.114515	0.438509	-0.0858373	0.628037
Pbxip1	-0.074485	-0.0209076	-0.0571043	0.0912719	-0.00763464	0.0584324	-0.025268	0.627909
Rpl15	0.0206805	0.0306396	-0.217414	0.0478248	0.0560545	0.201733	0.0202584	0.627748
Ern1	-0.0368492	-0.0110963	-0.00464231	-0.0154658	-0.000253939	0.00514973	0.009774	0.627724
Togaram1	-0.00597272	-0.0186007	-0.0171269	-0.000741193	-0.0195805	0.0529755	-0.0198271	0.627643
Pus7l	-0.0133923	0.00379106	0.00163883	0.00173804	-0.0145993	0.00882927	0.00301991	0.627618
Ercc6l	0.00322716	0.00135865	0.00631119	0.00149014	-0.00160243	0.0428968	-0.0152391	0.627561
Polr1d	-0.0249465	0.0147734	0.024244	-0.0961765	-0.050036	0.142837	-0.0294455	0.627496
Ccdc130	-0.0107632	-0.0200693	0.004396	0.00101927	-0.0065766	0.054074	-0.00151578	0.627413
Arhgap22	-0.12847	-0.0386697	-0.0899125	-0.241382	-0.0251041	0.233394	0.146684	0.627061
Dsn1	-0.00606736	0.010847	-0.00283464	0.0138435	-0.00814947	0.0113144	-0.00491382	0.627059
Wisp2	-0.105202	-0.0694975	-0.0176462	-0.0533344	-0.0837752	0.0165895	-0.0390381	0.626919
Mrps36	-0.051945	0.0459051	-0.00570732	0.107095	0.0885292	0.0761873	-0.048937	0.62671
Tfe3	-0.0464661	0.0326944	-0.0122904	0.028394	-0.0223876	0.0059351	-0.00960887	0.626625
Has2	-0.0753815	-0.137242	-0.0556628	0.102228	-0.0469553	0.335181	-0.125728	0.62657
Sdhd	0.00511244	-0.0112651	0.0249968	-0.0478009	-0.0332001	0.273523	-0.101314	0.626475
Btd	-0.00640435	0.0110717	-0.0679004	0.0203389	0.020663	0.0413294	-0.00829501	0.6264
Cfl2	0.0270999	-0.00911669	-0.101375	-0.05944	-0.0363366	0.200372	-0.0375637	0.626292
2810006K23Rik	-0.0137678	0.025074	-0.0146663	0.0277158	-0.0035077	0.016905	-0.0201619	0.626091
Gm7879	-0.00810585	-0.000295855	0.00141526	0.000120803	0.00899654	0.00469088	0.000908008	0.625941
Zfand1	0.000312203	-0.00437805	-0.00494561	-0.0292266	-0.0136829	0.0732903	0.0111545	0.625891
Pin4	-0.0784965	-0.0310853	0.027871	-0.00477453	-0.0402796	0.141365	0.0922764	0.625792
Uqcrq	-0.0381935	0.0355564	0.0237798	-0.121194	-0.106253	0.184275	-0.0459773	0.62578
Lsmem1	-0.00832776	-0.0265732	-0.0114494	-0.0105051	-0.0235139	0.0792326	-0.0167772	0.625367
Dcun1d4	-0.00627021	-0.00360062	-0.00295284	-0.0148386	0.0128431	0.0178015	-0.00495982	0.625222
Ankrd44	-0.00981337	0.00106874	-0.0228255	0.0110192	0.0103954	0.0100338	-0.00379631	0.62513
Snai1	-0.119487	-0.0103959	-0.0375203	0.0654672	-0.037671	0.0685847	0.0855482	0.625037
Cdc6	0.0024522	0.0120417	-0.00148078	-0.0289651	-0.0294895	0.0727315	-0.0191674	0.624859
Smim8	-0.0320979	-0.0111575	0.0125607	-0.016672	-0.0383904	0.0673204	0.0243233	0.62447
Fgfr1op2	-0.00293249	0.077802	-0.0685959	-0.00519325	-0.0563962	0.0723668	-0.0639973	0.624152
Hsd17b10	-0.0618499	-0.041363	0.032294	0.0542078	-0.0857176	0.188864	-0.0422969	0.624117
Vbp1	-0.0207338	0.0467964	-0.0407822	-0.0548892	-0.041475	0.0301225	-0.0502263	0.623979
Selenoi	-0.0350416	-0.00927771	0.0101697	-0.0291246	-0.0198472	0.0195831	-0.00485144	0.623846
Nrm	-0.00535435	-0.000653661	0.0161242	-0.0113929	0.00163682	0.0513283	-0.0235173	0.623615
Clint1	0.0226057	-0.0249156	-0.0121491	0.0089862	0.0613728	0.172657	-0.00310645	0.623589
Mapkbp1	-0.00903157	-0.0116373	0.00487996	0.00994239	-0.0048159	0.0359327	-0.0104477	0.623444
Lamtor4	-0.0172269	-0.0221609	-0.0545687	0.0453976	-0.00736645	0.0811625	0.0215436	0.623405
Rpl7l1	-0.0361992	-0.00827558	0.0296661	0.0154361	-0.049145	0.164042	-0.114427	0.62332
Mtfr2	-0.00957345	0.0034186	-0.0113397	0.0134558	0.00526483	0.00622146	-0.0055459	0.623223
Helq	0.00573036	0.00719974	0.00197197	-0.00648627	-0.0146021	0.0468457	-0.00447023	0.622769
Pmm2	-0.0057371	0.00262295	0.0103059	0.0370771	-0.0471953	0.12345	-0.0310219	0.622713
Tmem30a	-0.0268035	-0.0457746	0.00246475	-0.107278	-0.0235425	0.201601	-0.00927997	0.622373
Mthfd2	-0.00984924	-0.00413344	-0.0152576	0.0215276	-0.0484785	0.0909997	-0.0462411	0.622129
Mrpl1	-0.0276638	0.0229572	0.00134963	-0.000288379	-0.0107283	0.00497026	-0.029431	0.622041
Ppp2ca	-0.105549	0.0542747	-0.0308585	0.0191616	0.0600858	-0.0012238	0.0180744	0.621678
Enah	-0.0224711	-0.0046885	-0.0384742	0.122958	0.0496846	0.136082	-0.0492524	0.621188
Cstf3	-0.00303617	0.00869833	-0.000817437	0.00157551	0.000418924	0.0441468	-0.0427826	0.62098
Znhit6	-0.046697	-0.000718088	-0.0317896	0.0779829	-0.0126884	0.0511475	-0.0190269	0.620785
Rnf13	0.0325037	0.0079131	-0.0630499	0.00682214	0.0277953	0.122988	-0.00828035	0.620778
Nr2f1	-0.11533	0.0824716	-0.0596976	0.0382925	0.107424	0.00981057	-0.0406286	0.62073
Gadd45gip1	-0.0520709	-0.0595347	0.017277	-0.00848063	-0.0751646	0.176268	-0.0710931	0.620538
Prepl	-0.0113689	0.0149472	-0.0017144	-0.0329596	-0.0118355	0.0213509	-0.020481	0.620105
B4galt7	-0.0173099	-0.00348783	0.000673766	0.00586338	-0.0118723	0.00638772	-0.00967886	0.619969
Tie1	-0.015775	-0.0167608	-0.0247855	-0.0141677	-0.0355485	0.0208171	-0.0154349	0.6198
Ubap1	-0.00219823	0.00651654	-0.0250366	0.0134128	0.0250086	0.025038	0.0106978	0.619503
Sec24c	-0.0165073	-0.00941201	-0.0397801	0.0262081	0.0280623	0.0421934	0.0210179	0.619482
Gtf2b	-0.0525199	0.0128793	-0.071798	0.11385	0.0368788	0.0710497	-0.00872623	0.619134
Enpp4	-0.0507745	0.0207875	-0.0366773	0.0718798	-0.0342428	0.062281	0.0541745	0.619058
Gtpbp1	-0.0166758	0.00454657	-0.00961535	-0.0150182	0.0290525	0.0128472	-0.00484898	0.618972
Pno1	-0.031756	-0.000769247	0.0393464	-0.0186986	-0.0405304	0.0942823	-0.044031	0.618942
Szrd1	0.00788529	-0.0238231	-0.0231529	-0.0464128	0.0117765	0.130671	-0.00761705	0.618672
Nit2	0.0137907	-0.0044654	-0.0103216	-0.0148239	0.00591744	0.0846823	-0.0178626	0.618422
H6pd	-0.000188367	-4.00695e-05	-0.00258645	-0.00769667	0.00842736	0.014081	-0.00518101	0.618407
Tsc2	-0.0575837	-0.00820144	0.0210575	-0.00231258	0.00453213	0.0173465	-0.0306328	0.618331
Ppp1cc	-0.0772251	-0.0243325	0.000831473	0.163981	0.0217735	0.159675	-0.0515808	0.618268
Dhrs7	-0.0550212	-0.0380121	0.0246414	0.00506327	-0.0510876	0.118845	-0.0832899	0.617927
Pole	-0.0255502	-0.0029503	0.0349357	0.00553489	0.0097623	0.0473838	-0.0169187	0.617702
Arhgap28	-0.00827062	0.00682833	-0.0165881	0.014272	-0.00342566	0.00774736	-0.00410247	0.617635
Man2c1	-0.0103246	-0.0233018	-0.0187174	-0.0202147	-0.0125348	0.0505804	0.00703398	0.617365
Meis2	-0.0374463	-0.0645179	-0.033345	-0.0147192	-0.0671878	0.12469	-0.0148945	0.617261
Trip13	-0.072746	0.0176871	0.0205244	0.0507893	0.0451329	0.0322278	-0.0325413	0.617191
Rps25	-0.0274773	-0.0201701	-0.0110761	-0.112574	-0.0717655	0.183627	-0.113417	0.616879
Sap30l	-0.0233641	-0.0183708	0.0318238	0.0668199	0.00981008	0.123134	-0.0337744	0.616645
Kank2	-0.0295216	0.0125548	-0.023216	0.0302862	0.0368229	0.0156098	0.00384617	0.616497
Hadh	-0.0310973	-0.00107804	-0.0433313	-0.0153936	0.0166177	0.00520483	0.0113532	0.616405
Slc48a1	-0.0714007	0.000540471	-0.113867	-0.00564202	0.0644062	0.0134617	-0.0265449	0.616387
Gars	-0.0358671	-0.0626462	-0.0297675	-0.147196	-0.0338117	0.218869	-0.00601397	0.615519
Vdac2	0.0494062	0.0395431	-0.212302	0.0415769	0.0657549	0.235463	-0.0597798	0.615453
Rsrc2	-0.178881	-0.000581037	0.0523731	0.0435081	-0.0199326	0.0394531	-0.00943849	0.615442
Tprn	-0.00973857	0.00748813	0.000835508	-0.0112126	-0.00458197	0.00267207	-0.00877364	0.615376
Cnot4	-0.0308932	-0.00228977	-0.0186015	0.0476614	0.0205625	0.033731	-0.0289574	0.615354
Trappc11	-0.00531457	-0.0308424	0.0312612	-0.00316294	-0.0278782	0.196441	-0.0376213	0.615303
Rps6ka5	-0.0468932	0.00406881	-0.0256572	-0.0150238	0.0392622	0.0148907	0.0289405	0.61477
Slc35d1	-0.0141012	-0.00335861	0.00623209	-0.0189908	-0.00803049	0.0164603	-0.00203555	0.614404
Gnpnat1	0.0104941	0.00141141	-0.00461043	0.00215461	0.00893563	0.0680806	-0.0311779	0.614331
E130309D02Rik	-0.0251674	-0.00424729	0.00306906	-0.00890335	0.00596837	0.00339103	0.000965878	0.614316
Fer	-0.0333882	-0.0120956	0.00349225	-0.0229971	-0.0346213	0.0216234	-0.00367023	0.614297
Hspa4	-0.0517627	0.0232983	0.0113431	-0.0240312	-0.027556	0.00411939	-0.0308878	0.613893
2010107E04Rik	0.0442944	0.00924601	-0.250927	-0.147149	-0.036703	0.303972	-0.0544707	0.613698
9230102O04Rik	0.000871562	-0.00966335	-0.0134005	0.0253465	-0.00404072	0.0558412	-0.0108322	0.613665
Wdsub1	-0.0173093	-0.00664236	0.00350842	0.0102061	-0.01066	0.0167387	-0.0149839	0.613514
Tspyl1	-0.0605237	-0.0104759	-0.0122835	-0.10603	-0.0552441	0.0907429	0.0385791	0.613332
Eif4a3	-0.0442238	-0.0014238	0.0253433	0.0838021	0.0770933	0.103209	-0.0530646	0.613292
Cep126	-0.0183401	-0.0050311	0.0035032	0.022346	-0.00342855	0.0208523	0.00259475	0.613059
Acss2	-0.0241816	-0.00124288	0.014299	0.00280691	-0.0226287	0.0257687	-0.0175304	0.61274
Eif1b	-0.0694195	-0.06497	-0.0416759	0.079453	0.0258197	0.117035	-0.0861303	0.612722
Dcakd	-0.0599764	-0.00364299	0.0100483	0.023611	-0.0155816	0.0305387	0.0322667	0.612287
4933434E20Rik	-0.0189692	0.0219356	-0.0934294	0.04131	-0.0548749	0.0684322	0.00752364	0.612002
Pxmp4	-0.00514147	4.16902e-05	-0.0217597	0.00578119	-0.0147102	0.0235758	-0.029093	0.61193
Tamm41	-0.0305269	-0.00249135	-0.00774343	0.0285593	-0.0146805	0.015374	-0.0111631	0.611605
Fpgs	-0.0074336	-0.002581	0.00783543	-0.00365769	0.00260287	0.0176923	0.0102162	0.611265
Haus2	-0.00806326	-0.0106053	0.00303268	-0.0024254	-0.0158164	0.0396428	-0.0186368	0.611056
Pskh1	-0.00449641	-0.0134107	-0.000993233	-0.00653694	-0.00855326	0.0402384	0.000939347	0.611027
Emsy	-0.0520643	0.0250028	-0.0211022	0.0280867	0.00636152	-0.00132862	0.00564333	0.610829
Nudcd2	0.0169269	-0.0230761	0.0186597	-0.0876098	-0.0463645	0.336771	-0.0904958	0.610668
Arih2	-0.0509399	0.0162076	0.000139555	0.0114135	0.0133149	0.00138681	-0.036426	0.610387
Rab8b	-0.00569218	-0.0118187	-0.0525539	0.00380118	0.0154964	0.0413719	-0.0296751	0.610228
Acox1	-0.00521953	-0.0317703	0.00827755	-0.00213211	-0.0127947	0.129134	0.0187503	0.610126
Nup205	-0.0112394	-0.0109431	0.018234	-0.00808693	-0.0188122	0.0659961	-0.015646	0.609991
Mrpl52	0.0572259	0.0415889	-0.298214	-0.0122363	0.000296666	0.292706	-0.0114178	0.609243
Cpne8	-0.0585217	0.00990966	-0.104143	0.0968566	0.0460154	0.0606515	0.00669772	0.609018
Rer1	-0.0355335	-0.013916	-0.00402729	-0.0217219	-0.0051621	0.012958	0.0154722	0.608928
Gtf2f1	0.00382897	0.0160586	-0.0304711	0.0507703	0.0368829	0.100619	-0.075919	0.608828
Yy1	-0.050668	0.0531954	-0.104368	0.0501722	-0.0348769	0.0212867	-0.0439125	0.607976
Gm4117	-0.0314977	0.0153501	0.0157466	-0.0143266	-0.023338	0.0142214	-0.0173284	0.607768
Pdcd2	-0.0723537	0.0149636	0.025007	0.000440036	-0.0203893	0.00926226	-0.027447	0.607719
Dynll1	-0.0842989	0.0491159	0.0320003	0.0159753	0.0328023	0.0179075	-0.0510658	0.607711
Llgl1	-0.0716181	-0.00765394	0.0301123	0.0103869	-0.0102169	0.023874	-0.0200682	0.607368
Myd88	-0.0375355	0.00391978	0.0140407	-0.0126325	-0.0571137	0.0424907	-0.0171703	0.607355
Grk6	-0.00504089	0.000645689	0.00868494	0.0266713	-0.0193288	0.0541988	0.00761307	0.607221
Hdac6	-0.00251875	-0.00972176	0.0109003	0.00485863	0.0130729	0.0449032	-0.00933756	0.607167
Kctd10	-0.0433399	0.0165552	-0.00664491	0.0261115	0.0104392	0.0019017	-0.00029101	0.606584
Taco1	-0.0103727	-0.00141823	0.0042824	-0.0083072	0.00217686	0.00481	-0.00314956	0.606292
Sag	-0.0101169	0.0512997	-0.000644004	0.000970732	-0.0196552	0.0225678	-0.00783332	0.606247
Rps6ka6	0.000600197	0.00452657	-0.00096016	-0.0245838	-0.00347344	0.0330675	-0.00485523	0.606244
Gnl1	-0.00684721	-0.0264152	0.0195009	0.0145081	0.0249423	0.0977966	-0.0140068	0.605845
Pi4kb	-0.0305085	-0.0254182	-0.00203913	-0.0032868	-0.010438	0.0204752	0.00256435	0.605685
Klhl21	-0.0505771	-0.0122295	-0.00393702	0.0219758	0.0362269	0.0196643	0.00016684	0.605671
Akr1b3	0.00143723	-0.0213839	-0.00492685	-0.0429003	-0.0165522	0.118135	-0.0262388	0.605598
Nutf2	-0.0147814	-0.0160023	-0.00906771	-0.0057016	-0.0186782	0.0171975	-0.0261777	0.60559
Golph3	0.0386494	0.0428024	-0.103474	-0.0380274	0.0486012	0.131743	-0.014973	0.605389
Nop9	-0.0290565	0.012533	-0.0217398	0.0449353	-0.0335014	0.0328539	0.00185822	0.605266
Cdc42bpg	-0.000400844	-0.0120459	-0.00412567	-0.0222495	-0.00847862	0.0665069	0.0116838	0.605254
Snapc4	-0.0101604	-0.00680931	0.00340589	-0.00477203	0.00384143	0.00976081	-0.00908731	0.605194
Cdca7	-0.012097	0.00245974	0.0336938	0.0353899	0.00623381	0.0675576	-0.0213605	0.604824
Chn1	-0.012006	0.0128522	0.0098768	-0.045693	-0.0103534	0.0469193	0.00426173	0.604795
Scaf11	-0.114277	0.0549382	-0.0823729	0.0493713	0.0397034	-0.0131109	-0.0203568	0.604789
Tns2	-0.0409875	0.0158396	-0.0511636	0.0261028	-0.0193897	0.0137403	0.0247505	0.60457
Cmc1	0.0121276	-0.0323516	-0.0119377	0.0403711	0.00445524	0.155464	0.00841557	0.604541
Tcf7	0.00046393	0.00315555	-0.0047612	0.00921163	0.0122546	0.013109	-0.00538863	0.603909
Smarcd1	-0.0195207	0.00515097	-0.00980103	0.026379	0.00808216	0.0103979	-0.00879722	0.603901
Emc3	-0.0342238	-0.0567461	0.0214687	-0.0406456	-0.109887	0.266811	-0.0011098	0.603423
Immt	-0.0144282	0.024512	0.0144301	0.0737908	0.00674014	0.0711512	-0.0363004	0.603374
Surf1	-0.0378694	0.00663203	0.015172	-0.00280889	0.00861594	0.0148475	-0.0392425	0.60314
Trp53inp2	-0.0120903	0.00267971	-0.00325352	-0.0182441	-0.00502579	0.00130044	-0.00418449	0.603044
Cdk6	-0.0302237	-0.0182269	0.0151751	0.0279296	-0.0322582	0.0782933	-0.0447233	0.60292
Ing2	-0.0669446	-0.0714381	0.029095	0.000676974	-0.0347063	0.14369	0.0201425	0.60263
Cep131	-0.0182757	-0.0124854	0.00369747	0.0177045	-0.00418289	0.0247881	-0.00216922	0.602609
Vgll4	-0.107245	0.0311694	-0.035512	0.0736171	0.0375241	0.00642925	-0.0186822	0.602455
Fnta	-0.0193836	-0.0547496	-0.029152	0.0108172	-0.0763191	0.184639	-0.0793134	0.601985
Fam219b	-0.00812132	0.0148047	-0.00615413	0.00267241	-0.0148031	0.00797286	-0.0138858	0.601738
Tbc1d31	-0.0405417	0.000377953	-0.00694022	-0.00161258	-0.0149854	-0.00796932	-0.0334663	0.601683
Dennd5b	-0.0393959	0.0266935	-0.0203959	0.0207252	-0.0475004	0.0219972	0.0186505	0.601427
Mastl	-0.0113899	0.000342705	-0.0365044	0.0156944	-0.0317179	0.0345396	0.00767116	0.601389
Adgrl1	0.000849958	-0.0157454	-0.00490505	-0.0290746	-0.0148745	0.0882124	-0.0338864	0.601321
Scpep1	-0.042952	0.0181101	-0.00123126	0.0101028	0.00465816	0.00534512	-0.0481105	0.601258
Lpin1	-0.000309546	-0.0151611	-0.0107013	0.00277176	-0.000355143	0.0414652	-0.0117111	0.600904
Wls	-0.159145	0.0156655	-0.269497	0.0125662	-0.0204974	0.0546579	0.120537	0.60072
Arl6ip6	-0.0689321	0.0160762	0.0512682	0.0290567	0.019977	0.0403011	-0.0294381	0.600513
Rrad	-0.0449711	0.038886	-0.0416175	0.0377424	-0.0260897	0.0057613	-0.0168685	0.599971
Fam110c	-0.0192669	-0.0439291	-0.00416759	-0.0440498	-0.0633867	0.161108	0.000646917	0.599672
Psmc3	-0.0128089	0.00328025	0.0176163	-0.0343584	-0.0876553	0.160584	-0.0607796	0.598721
Yars	-0.0445337	-0.00292736	0.0111225	-0.000555448	-0.0132946	0.00454432	-0.00696563	0.598646
Hax1	-0.0352959	0.0479028	-0.0958827	-0.0294281	-0.0499741	0.00645957	-0.0242014	0.598467
Msi2	-0.0403907	-0.0293971	0.0150506	-0.0753638	-0.0216663	0.078667	-0.0255021	0.598455
Pgf	-0.180174	0.0564569	0.0109184	-0.0694404	0.082997	0.00038644	0.00696523	0.598435
Vps13c	-0.0512527	-0.0154286	0.019068	0.0109316	-0.0331231	0.0353431	-0.00153066	0.598029
Smyd5	-0.0227608	-0.00428827	0.00390607	-5.67703e-05	-0.0176792	0.0168369	-0.0337946	0.597959
Cwc25	-0.0464897	0.0260904	-0.0130803	0.0337152	-0.00708783	0.00293678	-0.0263448	0.597956
Zfand3	-0.0754912	0.0278541	-0.0327376	-0.0080784	0.0111872	-0.0240768	-0.0298997	0.597759
Srf	-0.0190874	-0.00331736	0.00418392	-0.0300371	-0.00259911	0.0164457	-0.000752975	0.597502
Eno1	-0.00288498	-0.00256685	-0.0959066	-0.0209622	0.144419	0.286466	-0.260231	0.597355
Safb2	-0.0684592	-0.0131633	-0.00119626	0.0271303	-0.0826199	0.049221	-0.0292698	0.597308
Dhx33	-0.0219814	-0.00604358	0.00188264	0.0133273	-0.00447242	0.00880372	-0.00508498	0.596727
Cdc42ep3	-0.0645284	0.0172186	-0.0583218	0.0626264	-0.0143813	0.0126053	-0.0470929	0.596478
Tmem38a	0.00373318	0.0223544	-0.0241675	-0.00703485	-0.0175856	0.0264444	-0.0192306	0.596175
D3Ertd751e	-0.0140429	0.00820387	-0.0155833	-0.00314509	0.00749559	-0.00314188	-0.00374532	0.595912
Slc39a14	-0.00409808	-0.0128153	-0.101953	0.0923994	-0.00585406	0.131863	-0.0311305	0.595889
Scnm1	-0.0515782	-0.0232261	-0.000642728	0.106195	0.0261552	0.0951288	0.0133184	0.595675
Adpgk	-0.0410735	-0.000386219	0.0343604	-0.0348845	-0.0228244	0.0455613	-0.00596477	0.595453
Med26	-0.0387815	-0.00248351	0.00394594	0.0143724	0.0211239	0.00860712	-0.00920608	0.595093
Rpp14	0.0358561	-0.0181868	-0.0299327	0.00490449	-0.0231128	0.200924	0.00545721	0.594938
Pcna	-0.0973112	0.0100692	0.1027	-0.0258295	-0.0538714	0.146041	0.0693079	0.59487
Tmem245	-0.0490774	-0.00286726	0.0213805	0.00346408	0.026604	0.018023	-0.00925783	0.594837
Plet1	-0.0480012	-0.0389713	-0.149754	-0.163647	-0.225569	0.24276	-0.00411965	0.594363
Rbl1	-0.0154486	0.00910136	0.0126211	-0.00438511	0.0403691	0.0241751	0.00692407	0.594343
Sox9	-0.0961206	-0.104446	-0.0252532	-0.0210968	-0.0574805	0.172897	0.0818421	0.593954
Eif3i	-0.0576028	-0.0411384	0.00813645	-0.0151909	-0.142943	0.175718	-0.0491408	0.593007
Aldoa	0.00657007	-0.000144455	-0.122983	-0.0141553	0.0887295	0.166044	-0.14862	0.593007
Edem3	-0.0352384	-0.00870069	0.00205593	-0.0401856	-0.0144647	0.00644624	-0.0131114	0.592905
Pfkp	-0.0850918	-0.0247538	-0.093341	0.262839	-0.0249057	0.228286	-0.0353028	0.592879
Hsp90aa1	0.00539842	0.0265767	-0.141035	-0.0376606	-0.158133	0.192349	-0.127101	0.592833
Hyou1	-0.0345133	0.018961	-0.00521712	-0.0209919	0.0552508	0.0196797	-0.0290907	0.592765
Etfa	-0.00332159	-0.038935	-0.0416346	0.00110582	-0.0147616	0.088485	-0.0326412	0.592432
Clasrp	-0.0347395	0.0110095	0.00420445	-0.0215913	-0.0215275	0.00155317	-0.00235702	0.592424
Edc3	-0.0405936	-0.0210788	0.00561635	0.00718462	-0.014489	0.0153343	-0.0182032	0.592214
Tmem131l	-0.0252739	0.0138405	-0.0108098	0.00782935	0.00886695	-0.00394273	-0.00271337	0.592209
Micall1	-0.0415018	0.0140489	-0.0168625	-0.0588714	-0.00487319	1.04997e-05	-0.00647519	0.591926
Coq2	-0.0313968	0.00417725	0.00924809	0.0378886	0.00488031	0.0269865	-0.0273509	0.591924
Set	0.000265966	0.057523	0.0558573	0.0137139	-0.0927817	0.205002	-0.078107	0.591855
Mrps24	-0.0200125	-0.00822218	0.0681477	-0.023521	-0.0155993	0.162019	-0.0585608	0.591806
Arhgdib	-0.0613362	-0.0361384	-0.0292809	0.259811	-0.0350114	0.296363	-0.0684835	0.591765
Sptlc2	-0.0226294	0.00646807	-0.0067952	-0.0673003	-0.0394517	0.0581041	-0.0703134	0.591645
Golga2	-0.00692729	-0.00275595	-0.00994132	0.016853	0.00862325	0.0207439	-0.0200465	0.59129
Polr3c	0.0126467	0.0263951	-0.0328037	0.000474354	-0.0389745	0.06557	-0.0228232	0.590907
Ddx24	-0.0145202	-0.0373842	-0.0986382	0.10575	-0.00835647	0.154964	-0.0395133	0.590756
Fam193a	-0.0659959	0.00544137	0.00229612	0.0118809	0.0232168	0.000506678	-7.36511e-05	0.590719
Atg2b	-0.00551844	0.00455438	-0.0399016	-0.0557887	-0.00332898	0.0380611	-0.00415974	0.590398
Mtss1	-0.18381	-0.0735561	-0.14411	-0.348077	-0.011991	0.112682	0.0283335	0.590177
Fnbp4	-0.0831311	-0.00430016	0.0209647	0.0182225	0.0206931	0.0148311	-0.0387846	0.590172
Egln3	-0.077521	-0.0615057	-0.0535007	0.080594	-0.217824	0.294948	-0.179158	0.590105
Spc25	-0.00285567	0.00965168	-0.0385524	0.0422215	-0.0284197	0.0637376	-0.0411599	0.589463
Bloc1s1	-0.128856	-0.024944	0.0262441	-0.0524728	-0.0708219	0.0974935	0.0938251	0.589244
Ndufa3	-0.0400881	0.0476959	-0.0644661	-0.0486664	0.0418977	0.03098	0.0560629	0.589199
Cntrob	-0.0219206	0.00111105	0.00284207	0.00389863	-0.0241429	0.00981492	-0.011965	0.589015
Fbxo42	-0.0162908	0.000682625	0.00277514	0.0115368	-0.0151997	0.0153503	-0.0200567	0.588805
Stag2	-0.0465138	0.0224584	-0.0396863	-0.0171841	-0.00186054	-0.016112	0.00095342	0.58851
Dcaf12	0.00840444	0.00193953	-0.0349215	-0.0111007	0.00143282	0.0371795	-0.00967551	0.588352
Dpp7	-0.0279908	-0.00406991	0.00670142	-0.00452462	-0.00629373	0.00307201	2.72614e-05	0.588089
Ubqln4	-0.00234908	0.0255123	-0.0171228	-0.0197928	0.0812623	0.0564698	-0.0121874	0.587994
Snx25	-0.00761092	0.00419261	0.0119282	-0.0192404	-0.00443164	0.0335403	-0.0260935	0.587326
Gcat	-0.0218419	-0.00922543	0.0359379	-0.00954206	-0.0886654	0.209494	-0.117442	0.587306
Rrbp1	0.010647	-0.0135616	-0.0170081	0.00824091	0.00525322	0.139423	-0.0892809	0.586839
Kitl	-0.176897	0.00774226	0.0256056	-0.0910295	-0.0664455	0.0295817	0.0548629	0.586688
Spg11	-0.00993431	0.00528013	0.00762444	-0.0166747	-0.00264794	0.0119165	-0.00982382	0.586091
Mre11a	-0.0394598	-0.0185327	0.065388	-0.00683723	-0.0449004	0.145449	-0.0556457	0.586055
Faap100	-0.00756665	0.00964738	-0.0122579	-0.00572155	-0.0332085	0.0207768	-0.012514	0.586041
Ift22	-0.0767938	0.0183986	0.0294243	0.0115068	-0.00213411	0.0109798	0.00634229	0.585821
Ppp3cc	-0.0211253	0.0138619	-0.0596128	0.0127965	0.0424116	0.0207285	0.00272433	0.585625
Artn	-0.0192799	0.0289874	-0.016173	-0.0194682	-0.000207228	-0.000210215	0.00172186	0.585588
Gpx8	-0.0110278	0.0300142	-0.065197	0.123039	0.0386322	0.102843	-0.0495508	0.585371
Bmp2k	-0.0388476	0.0413066	-0.0159326	0.0258586	-0.0465891	0.01473	-0.0165227	0.585228
Mpc1	-0.0713084	-0.040378	-0.0308881	0.131658	0.0252356	0.110092	-0.0325577	0.585137
Sin3a	-0.0397271	0.0323654	-0.0176691	0.0774367	0.0308824	0.0343698	-0.0336218	0.584817
Rtca	-0.0748793	0.036556	0.0110025	0.040736	-0.0131304	0.00718873	-0.00187474	0.58472
Rrm2	0.00112936	-0.042036	0.0115503	-0.0604967	-0.178874	0.419069	-0.12399	0.58454
4930522L14Rik	-0.00647389	0.0129505	0.000656516	-0.0167243	-0.00342742	0.00819613	-0.00686728	0.584382
Rad51	0.00258659	0.0425322	-0.0139359	0.0498328	-0.0237432	0.0540689	-0.0188964	0.584354
Fkbp1a	0.0266291	0.0303674	-0.0324638	-0.0310215	0.0175176	0.122398	-0.0883423	0.584295
CAAA01118383.1	-0.0175651	-0.011895	0.0212324	-0.0210353	-0.00311369	0.0454115	-0.0161185	0.583816
Arf4	-0.0631109	0.0995715	-0.273383	0.00597472	0.110528	0.0829068	0.0544346	0.583555
Nav3	-0.0224591	-0.0297594	-0.0552253	0.03788	-0.0372488	0.0734933	0.0125297	0.583506
Vps4b	0.00998504	-0.000157621	0.0323746	0.065341	0.0383828	0.155244	-0.0655215	0.583111
Tprkb	-0.0280614	0.0115584	0.0315979	-0.000591007	-0.0692921	0.0936099	-0.0485877	0.582584
Glmn	-0.0710618	-0.0165807	0.017674	-0.00643598	-0.0323753	0.0115337	-0.0167698	0.58232
Bcl10	-0.093335	0.0409662	-0.122764	0.14353	0.0916715	0.061362	0.020398	0.582109
A230050P20Rik	-0.0550258	0.0690927	-0.0420193	-0.0142944	-0.0277989	-0.00558821	0.0100079	0.582067
Tom1	0.00208854	-0.0045428	-0.0203612	0.00661663	-0.0137263	0.0325947	-0.0154521	0.582054
Acads	-0.0434174	-0.0389926	0.00750107	-0.10167	-0.0732092	0.140538	-0.000390996	0.582019
Bnip1	-0.0469276	0.0229528	0.0256647	-0.0243707	-0.0383734	0.0229233	-0.0338533	0.581844
Scand1	-0.0523788	0.030702	0.0554755	0.162922	-0.0115519	0.27292	-0.221945	0.581837
Dpagt1	-0.00488741	0.00822252	-0.0215852	0.0268504	-0.00248121	0.0277935	-0.0284737	0.581689
Zfp280c	-0.0232993	0.0159986	-0.00105567	0.0133967	-0.00270057	0.00307957	-0.0223911	0.58163
Erh	-0.0959643	-0.00361002	0.0745219	-0.157139	-0.0482582	0.150652	0.0045146	0.58124
Nepro	-0.0121149	0.00783118	0.0044435	-0.01021	0.00129687	0.002123	-0.00635355	0.581193
Ndufv2	0.0155579	-0.0248295	0.0213893	0.0430976	0.0108085	0.192143	-0.0619143	0.581161
Ttc33	-0.0201324	-0.00799391	-0.00921951	0.0224234	0.0342654	0.0343889	-0.0358163	0.580822
Map1s	-0.0763919	0.0139254	0.0167514	0.0928057	-0.00940672	0.0590434	-0.0658529	0.580118
Lyplal1	-0.00907793	-0.015973	0.0080063	7.18182e-05	-0.0170806	0.0525825	-0.0218416	0.580098
Rpl7a	-0.0132332	-0.0195313	0.0157291	0.0210043	-0.0606796	0.127662	-0.0185062	0.580033
Pdha1	-0.0651427	0.0102942	-0.0180445	0.0308452	-0.0708375	0.0218426	-0.000541105	0.579696
D11Wsu47e	-0.0271584	-0.00319493	0.00243841	0.0128268	-0.0066241	0.00875717	0.00869615	0.579632
Rac3	-0.0110354	-0.019745	-0.0265394	-0.00190754	-0.0367966	0.0566005	-0.0564033	0.579452
Cyb5b	0.00655114	0.0283709	0.01876	0.037004	-0.151972	0.294344	-0.114061	0.579197
Gm21988	-0.00498602	-0.00591366	-0.000369718	0.00941232	-0.00111811	0.0149205	-0.00720977	0.579085
Cish	-0.0568075	-0.0519809	-0.0230227	0.116248	0.00606279	0.127032	0.0182307	0.578928
Crtap	-0.037678	-0.0166165	-0.0776325	0.0106379	0.0797497	0.0457807	-0.0275528	0.578793
Gm7292	-0.0117357	0.00612726	-0.00610413	0.00472394	0.00324836	-0.00131311	0.00256453	0.578773
Rpl27	-0.0442073	0.000911383	0.0344444	-0.132618	0.0255972	0.12523	0.00465504	0.578724
Pkm	-0.0164517	-0.109981	-0.0627113	0.0520732	-0.00252984	0.296714	-0.165177	0.578645
Zbtb8os	-0.0837265	-0.022148	0.049228	-0.0276414	-0.0104689	0.048776	-0.0630465	0.578338
Ttc27	0.0223892	0.0172109	-0.0135811	0.0220429	-0.0145864	0.0817561	-0.0270082	0.578336
Dph2	0.00294718	0.000168779	0.00426486	0.00425718	0.00737352	0.0218589	-0.00891883	0.578215
Park7	-0.00994099	0.0398891	0.0241196	0.032713	-0.0546513	0.0956496	-0.0578582	0.577858
Ddost	-0.0527884	0.0130113	-0.0219211	0.063134	0.0755796	0.0342978	0.0122353	0.577799
Suv39h1	-0.0191179	0.0362812	-0.0201248	0.0333793	-0.0204564	0.0181885	-0.0257762	0.57769
Amigo2	-0.0348772	0.024967	-0.0419328	-0.0696213	-0.00579213	0.00185316	-0.011157	0.577549
Cryl1	-0.0174082	0.0111872	-0.0275448	0.0364207	-0.00387531	0.0161929	-0.00662593	0.577187
Fut11	-0.0217413	0.0116537	-0.00769327	0.0166759	-0.0239231	0.00796852	-0.00633927	0.577152
Arpc1b	-0.0272669	-0.00514291	0.0504067	0.0167398	-0.0566359	0.119884	-0.0186938	0.577099
Rbm7	-0.09667	0.047688	0.0302204	-0.00437194	-0.0440799	0.0152922	-0.0871274	0.5765
Gosr2	0.0214026	-0.00012676	-0.00539452	-0.0374186	-0.0421477	0.147279	-0.0229508	0.576483
Smg5	-0.0189612	-0.040077	0.00805094	-0.0591554	-0.0489484	0.136744	-0.00755776	0.576249
Chchd7	-0.045459	-0.00275861	-0.0191386	-0.00664429	0.0658099	0.0278199	-0.0556736	0.576041
Gpr107	-0.0323765	-0.0166647	-0.000971056	-0.0365707	-0.00498384	0.00553394	-0.0248362	0.575947
Rpl37	-0.0497683	0.0746336	-0.195981	-0.116103	0.0230863	0.057537	0.0491699	0.575901
Ube4b	-0.0446277	0.0177385	-0.00121834	0.00283817	0.0187766	-0.00151672	-0.0369443	0.575498
1110019D14Rik	-0.0116388	-0.00268928	-0.00710961	0.0123738	-0.00836757	0.00853502	0.00330907	0.57544
Mrm3	-0.0123218	0.00668638	0.0084881	0.0102376	-0.0199263	0.0197353	-0.000801714	0.575409
2410004B18Rik	-0.0228265	0.0370181	-0.0497398	0.0285489	-0.00965487	0.0102461	0.0023274	0.575193
Unk	-0.0244565	0.00825736	-0.00172177	0.0299707	0.0030431	0.0100092	-0.0101785	0.575049
Ticam1	-0.000826593	-0.00657266	-0.00913051	-0.00618897	0.000679961	0.0163378	0.00455424	0.574948
Rhbdf2	-0.0265486	-0.0227322	0.0479461	0.0335082	0.00378201	0.098719	-0.0217991	0.574453
Eif5	-0.0178465	-0.0636083	-0.0952292	-0.0475876	-0.0398259	0.0786928	-0.0426222	0.574198
Brf1	-0.0292536	-0.00127317	0.00670038	-0.0261212	0.000593104	0.0034504	-0.0165352	0.574187
Pcnx4	0.00524883	-0.0229754	-0.0177606	-0.0075753	-0.00564821	0.0700256	-0.0058323	0.573701
Fmnl2	-0.0233388	-0.0189858	-0.00441982	-0.00586636	-0.0113216	0.0266145	0.019515	0.573519
Farp1	-0.00720121	0.0311471	-0.0684519	-0.018661	0.0325906	0.0243848	-0.0039259	0.573278
Kidins220	-0.0171958	-0.0156384	0.00534663	0.0028154	-0.0355555	0.0479415	-0.0135781	0.573167
Decr1	-0.0651577	0.0879783	-0.104928	-0.0496055	0.118774	0.0228712	-0.000582348	0.572808
Vim	-0.0910052	0.0893842	-0.729718	0.285477	0.0497654	0.365494	0.0827574	0.572787
Ubr1	-0.0311658	-0.0205111	0.0120054	0.0134401	0.0131336	0.0283169	-0.00032477	0.572367
Ccdc57	-0.00214875	-0.00513999	0.00093851	-0.0061696	0.000513513	0.0122322	-0.00206765	0.572301
Lats2	-0.0252448	0.018188	-0.0381488	-0.0193732	0.0170756	-0.00531925	-0.0136407	0.57221
Ikbkap	-0.00612966	0.00479427	0.0194616	0.0266687	0.00607372	0.0448757	-0.0252785	0.572197
Ciart	-0.0156935	-0.00705068	-0.0202348	0.0222036	0.0227179	0.0191381	-0.012864	0.572178
Tbc1d25	-0.0055451	-0.00916171	-0.0110311	-0.00809377	-0.00942878	0.00425811	-0.0120962	0.572032
Cog1	-0.0285456	-0.00330698	0.0230069	-0.004696	-0.00719433	0.0232742	-0.023844	0.571993
Kin	-0.0215244	0.00854933	-0.0755093	0.0776421	0.0117224	0.0558725	-0.0296145	0.571731
Elmod3	-0.016078	0.0204549	-0.0093622	-0.0132369	0.0033312	-0.002286	-0.0155894	0.571568
Eef1akmt1	-0.0256776	0.0310612	-0.054588	0.0880306	-0.00597212	0.0478623	-0.00837118	0.571452
D17H6S53E	-0.0263762	-0.00163225	0.0149255	0.00617015	0.00998638	0.0109258	-0.00201815	0.571446
Azin1	-0.0292742	0.0661109	-0.204317	-0.056452	0.0243126	0.0624379	0.0353644	0.571209
Rufy2	-0.0154677	-0.0114735	0.00185198	-0.0479651	0.00159456	0.0478051	0.00795573	0.570992
Timp2	-0.02085	0.0135003	-0.153012	0.0470137	0.12477	0.105313	-0.0818618	0.570832
Gm10031	-0.025225	0.00297251	-0.00264299	-0.00337614	-0.00189299	-0.00643867	-0.00246461	0.570676
Synj2	-0.0282928	0.0119064	-0.0077587	-0.0242711	-0.0282122	0.0114315	0.0183573	0.570546
Mcl1	-0.140843	0.0228412	-0.192448	0.112442	0.152069	0.0705735	0.0879871	0.570352
Adam19	-0.00800619	-0.00107737	0.00493182	-0.0122654	-0.0194604	0.0219754	-0.00693633	0.569718
Cdkl5	0.0047161	-0.00456645	-0.010717	0.00129268	-0.00218155	0.0267466	-0.0101944	0.569485
Sec23ip	-0.019853	0.0172553	0.00919576	-0.0106549	0.0162716	0.0107637	-0.0269467	0.569431
Idh3g	-0.0441828	0.00172626	-0.0361492	-0.0843912	-0.0778812	0.0550469	0.0262706	0.569307
Pla2g15	0.0152948	-0.024364	0.00646367	-0.00794837	-0.0228371	0.152392	-0.0326562	0.569306
Zfp503	-0.0963718	0.0683934	-0.307483	-0.0821013	0.0604994	0.0628245	0.0856274	0.568821
Pigo	0.000644793	-0.00216634	-0.00164441	-0.00883299	-0.00548048	0.0166386	-0.00418937	0.568279
Picalm	-0.014405	0.00881089	0.0366901	-0.0499824	0.032465	0.0910291	-0.0585593	0.568269
Utp18	-0.00708891	0.0236967	-0.00502463	0.0212394	-0.0618444	0.0685648	-0.0316203	0.568261
Siva1	-0.0319204	-0.0209658	-0.0761217	0.139959	0.0231562	0.122492	-0.00647315	0.568229
Yipf1	-0.0437724	-0.0204433	0.0120429	-0.0210731	0.0171077	0.0211974	0.00360531	0.568214
Sema3b	-0.00224964	0.00772561	-0.0433662	0.00276953	0.0222686	0.0221771	0.00226171	0.568027
Vrk3	-0.0516932	-0.00437046	0.066823	0.00952004	-0.0428493	0.0921867	-0.0256458	0.567949
Gm16536	-0.0175845	0.00640632	-0.0086757	-0.000349433	-0.00522221	0.00351269	0.0167389	0.567898
Ppm1h	-0.00738879	-0.000349861	-0.0136644	-0.00246983	-0.0186277	0.006514	-0.0187922	0.567863
Hmgb1	-0.0417241	0.102923	0.0223516	-0.103357	0.116423	0.078618	0.00628211	0.56764
Mrps26	-0.00417339	-0.0350241	-0.001448	-0.0152931	-0.0394883	0.115383	-0.0194077	0.567545
Nop10	-0.0516618	0.0275747	-0.0138341	-0.0226276	-0.0938599	0.109166	0.102146	0.567341
Nkiras1	-0.0126062	-0.00961571	-0.00363776	0.014566	-0.0142568	0.0236812	0.006826	0.567269
Cenpu	-0.0172294	-0.00424807	0.0157167	0.0295878	-0.0212461	0.0518051	0.0202838	0.566848
Smad1	-0.0314197	-0.0614634	0.0158981	-0.0251098	-0.0671937	0.158503	-0.0599697	0.566467
Acvr2a	0.000392967	-0.0056739	-0.00752627	0.00268726	-0.00758532	0.0270267	-0.019543	0.566434
Arhgap21	0.0130327	-0.0510069	-0.101741	0.0468769	0.00866155	0.160685	-0.0359191	0.566243
Il1rn	-0.0354545	-0.0242419	0.0184304	-0.0440035	-0.0672733	0.0846373	-0.0420918	0.566142
Nop2	-0.00118348	-0.0167437	0.00885438	-0.013796	0.00327928	0.0614178	0.0093196	0.566056
Spred2	-0.0810922	0.0245839	-0.00684373	-1.01522e-05	0.065847	-0.000212555	-0.00433912	0.565773
4931406C07Rik	-0.0269332	-0.0279531	0.0846746	-0.0379653	-0.0529418	0.21692	-0.052892	0.565636
Nubpl	-0.0117171	-0.00452559	0.023778	0.00169304	0.0119925	0.0431206	-0.0262557	0.565569
Ngly1	-0.00376248	0.00579911	-0.00470219	-0.00817159	-0.02457	0.0200332	-0.00925347	0.56533
Npm1	0.00112243	-0.00985457	0.0195633	0.063971	-0.00895855	0.140059	-0.0628263	0.565154
Polr2b	-0.0920458	-0.00728798	0.0120846	0.0609715	0.00577258	0.0226464	-0.0314102	0.564947
Rad51d	-0.00961306	0.0200225	0.00901633	-0.0235177	-0.029376	0.0310923	-0.0159448	0.564373
Atp5g1	0.0380899	0.0186535	-0.0534824	0.00914798	-0.056008	0.152237	0.0196639	0.564233
Cdca4	-0.0312162	0.0514056	-0.0773283	0.023903	0.045053	0.0115911	-0.0293959	0.563945
Tsr3	-0.0950239	0.027953	0.0272534	0.00628062	-0.0517938	0.0125131	0.00655598	0.563605
Tmem97	0.00877492	-2.09456e-05	-0.0473664	0.0478959	-0.0995331	0.162884	-0.0115392	0.563584
Phf23	-0.0993904	0.0208604	-0.0102431	0.0304219	0.0626329	-0.00176226	-0.0309502	0.563503
Jkamp	-0.0427021	-0.00855658	0.0105569	-0.0934046	-0.00669007	0.0520363	-0.0142505	0.563472
Flnc	-0.0462829	0.044781	-0.159469	0.0821851	-0.11315	0.0920646	0.0241111	0.562513
Wdr54	-0.015659	-0.0106963	-0.0208875	-0.0471087	0.0037062	0.0268992	0.00643387	0.562367
Pex11b	-0.0441168	0.0436151	-0.0252121	-0.037669	0.0200583	-0.00910846	-0.0254751	0.562299
Rock2	-0.0109999	0.0635865	-0.0975419	-0.00913792	0.0201838	0.0237422	-0.0394044	0.562243
Adprm	-0.0170807	-0.0122642	-0.023221	-0.0072025	-0.0206036	0.0164419	0.0149449	0.562026
1810044D09Rik	-0.00629578	-0.00447759	-0.000616439	-0.0206075	0.00357787	0.0156428	-0.00961951	0.561839
Otud6b	-0.0220239	-0.00305248	0.00527194	-0.0350142	-0.0303784	0.0226756	-0.0121234	0.561277
Lilr4b	-0.00263416	0.0107089	-0.0124674	-0.0516897	0.0410841	0.0502812	-0.0134577	0.561232
Cdc42	-0.0338223	0.0140349	-0.00916848	-0.0787266	0.108896	0.0839992	-0.0686761	0.561203
Cenpx	-0.00443479	0.00779132	-0.0672062	0.066702	0.0201147	0.0603849	-0.00385258	0.560492
Rpl4	-0.0624593	-0.0723131	0.0578196	-0.0745836	-0.0743305	0.190226	-0.0523735	0.560289
Golm1	-0.0258158	-0.00550474	-0.0360253	0.0705732	0.0259427	0.0460236	-0.00536441	0.559608
Cand2	-0.0265663	-0.00318131	0.010316	-0.0144993	-0.0206894	0.0117774	0.000336747	0.558961
Lss	0.0140862	-0.012742	0.00507305	-0.0231527	-0.02791	0.122677	-0.0305746	0.558945
Ppp2r5e	-0.0178386	-0.0106658	0.0380634	-0.061864	-0.0531755	0.138457	-0.0657474	0.558912
C430042M11Rik	-0.0265428	0.00438028	-0.0128761	-0.00707526	-0.000563955	-0.0103777	-0.00122821	0.558863
Chd8	-0.0224399	-0.00531298	-0.0269073	0.0520349	0.00847152	0.0314614	-0.00487807	0.558675
Gm12976	-0.0095773	0.0123907	0.00131743	-0.00560826	-0.00719224	0.00497201	0.00865851	0.558546
Trim37	-0.0343729	-0.00560664	0.0159279	0.0681417	-0.0335282	0.075167	-0.0327536	0.558532
Col5a1	0.0269403	0.00080031	-0.111169	0.0488064	-0.0175157	0.130891	-0.0406525	0.558482
Oaz2	-0.0728181	0.00188864	-0.0282607	-0.0234782	-0.03131	-0.0290768	-0.00628199	0.558344
Rpl36a-ps1	0.00411337	0.0140437	-0.00203834	-0.0679621	0.000947442	0.0735253	-0.0239414	0.557658
Plpbp	-0.0128434	-0.00423827	0.0231763	-0.0208883	-0.0284317	0.0631961	-0.0335146	0.557538
Vegfc	0.00952487	0.00046392	-0.072344	0.0487628	-0.0223836	0.0915939	-0.0532068	0.557499
Ibtk	-0.0268867	0.000664922	0.00272524	-0.00218568	-0.0249716	0.00264529	-0.00887486	0.557282
Sumf2	-0.0613901	-0.0284065	0.0408143	0.00935192	0.0310697	0.0554325	0.0192921	0.557065
Mrpl55	-0.00198793	0.023971	-0.0141368	-0.0385806	-0.0086367	0.0251821	-0.0272124	0.556911
Rnaseh2b	0.00608789	0.00585496	0.00663846	-0.0146875	-0.0281786	0.0666403	-0.0260497	0.55689
Dand5	-0.00488996	-0.00461999	0.00265861	0.000406876	-0.0102593	0.0143443	-0.00366595	0.556889
Gins4	-0.0069403	0.0414881	0.0282101	-0.030148	-0.0167698	0.0618512	-0.0521756	0.556793
Plekha8	0.00585763	-0.00954074	0.00476269	-0.0318956	-0.00580671	0.0736332	-0.0156988	0.556753
Hotairm1	-0.094809	-0.0300615	0.0632408	-0.00969584	0.0361017	0.0708869	-0.0804397	0.556563
Cox7b	0.0365623	-0.00704097	-0.0395406	0.0089929	-0.0143409	0.154456	-0.0647946	0.556292
Prrc2a	0.00442512	-0.0623153	0.00269062	0.012997	-0.010655	0.189115	-0.0459528	0.555992
Csk	-0.0439191	-0.000361099	-0.0403236	0.0239247	0.0383451	0.00461432	-0.00936243	0.555782
Pfkfb4	-0.016025	-0.0100369	-0.017101	-0.0136647	0.0160516	0.0112158	0.00947156	0.555608
Rhbdd1	-0.0118821	-0.0115738	-0.0222775	-0.0249933	-0.0119354	-0.000785865	-0.0251908	0.555225
Ttk	0.000298615	-5.83834e-05	-0.0104964	0.0160601	0.00585097	0.028001	-0.025232	0.55519
Foxo3	-0.0457183	0.00563061	-0.0473884	-0.0350742	-0.0358808	-0.00758594	0.0166883	0.555153
Ikbkg	-0.0215222	-0.00622377	0.00741775	-0.0119816	0.0190678	0.0119179	-0.00457051	0.555055
Casp9	-0.00675465	7.95183e-05	-0.00108296	-0.00543085	-0.0164346	0.00898714	-0.00338032	0.554611
Zfp574	-0.0346064	-0.00209246	0.000191107	0.0103747	0.00398958	-0.00134083	-0.00397746	0.554437
Mrps33	0.0248804	0.00915144	-0.0506747	-0.0209184	-0.00551943	0.0784345	0.00978981	0.554366
Praf2	-0.0217145	-0.000333766	-0.0152108	0.0216127	-0.0142688	0.00813081	-0.0252122	0.554323
Qrich1	-0.0996335	-0.0265759	-0.00171709	-0.0307598	0.0290463	-0.00624206	-0.0184686	0.553773
D10Jhu81e	-0.0345166	-0.0154987	-0.0318941	-0.0334656	-0.0134773	0.0255679	0.0385985	0.553544
Top2a	-0.149827	0.00299336	-0.0446084	0.191971	0.0227121	0.114893	-0.219798	0.553483
Grwd1	-0.0425746	0.0408609	0.00411829	0.0405114	0.0161676	0.00650205	-0.0183851	0.553412
Dcaf5	-0.0527382	-0.0215357	0.0135022	-0.0370338	0.00217373	0.0111022	-0.0279319	0.55335
Gla	-0.00767461	-0.00355218	-0.0391182	-0.00741126	0.0836919	0.0588591	-0.0124553	0.553243
Cox6c	0.0045091	0.137675	-0.270067	-0.192073	-0.00921977	0.163257	0.0740062	0.5527
Eapp	-0.0439424	-0.0136696	0.028699	-0.0124863	-9.31778e-05	0.0387822	-0.0587971	0.552322
Tbl2	0.0030857	-0.00344088	-0.0154695	-0.0271092	-0.0137053	0.0349283	-0.0176541	0.552101
Fam199x	-0.0121948	-0.00830003	0.00190257	0.00254247	-0.0107655	0.0161333	-0.0229265	0.551651
Snx1	-0.051437	0.0294572	-0.0687515	0.0616444	-0.00415185	0.00754698	-0.0374606	0.551403
Rrp36	-0.0742471	0.0259229	0.00156578	0.00648838	-0.0140502	0.00258712	0.0396372	0.551183
Ubap2l	-0.0120727	0.0163063	-0.087135	0.0711739	0.0414251	0.0568158	0.00628469	0.551081
Atg4c	-0.0159209	0.000923383	-0.00199714	0.0121746	0.0113692	0.003857	0.00293214	0.55095
Btbd1	0.0304762	-0.012778	-0.0406242	-0.000338547	0.0782036	0.133095	-0.0385961	0.55092
Crim1	-0.053388	0.0103543	-0.0237398	0.126561	-0.0191985	0.0754255	-0.0455112	0.550887
Vwa8	-0.0109274	0.0268618	-0.0214349	0.0122658	-0.0238877	0.010034	-0.0157093	0.550799
Nedd4	-0.118088	0.0296875	-0.111267	0.0651185	0.0221323	-0.0216904	-0.0288931	0.550747
Timm9	0.0216157	-0.017041	-0.0274866	-0.0384362	-0.0610834	0.155717	-0.0166235	0.550627
Rfc5	-0.00621389	0.00945032	0.0391403	-0.00697736	0.00951985	0.0685692	-0.0420261	0.550318
Sema7a	-0.00430704	-0.0266275	-0.0430392	0.0527846	-0.0218973	0.0865063	-0.0208448	0.550206
Fgfrl1	-0.0804972	0.0158491	-0.0294362	-0.0355955	0.0560939	0.0067512	0.0470604	0.550195
Snw1	-0.055096	-0.0273334	0.051599	0.0189255	-0.0229764	0.07475	-0.0290449	0.55011
Piezo1	-0.0544883	-0.0119654	-0.0423343	0.0685682	-0.10597	0.0780814	-0.0298089	0.549887
Mrpl10	-0.0550658	-0.0241291	0.0388789	0.0115612	-0.0119115	0.0558777	-0.0571041	0.549575
Rpl9-ps6	-0.0166544	0.0155656	0.00697955	0.0110801	-0.0628031	0.0567305	-0.00269488	0.549486
Anp32b	0.0568775	0.0461014	-0.0542573	0.133578	0.0120761	0.213075	-0.0925534	0.549188
Mrps5	-0.063262	0.0157782	0.0157423	0.0547682	-0.0903073	0.0681799	-0.0645026	0.548853
Eml5	-0.00145192	-0.0182822	-0.0163292	-0.0355676	-0.0436326	0.0727572	-0.0167666	0.548092
Ybx1	0.0111053	-0.000826496	0.0745223	-0.0245683	0.00242714	0.195815	-0.0710855	0.548022
Mknk2	-0.103829	-0.0201111	-0.0124582	-0.116085	-0.0823793	0.0581564	0.0596266	0.548017
Tgfbr3	-0.0292086	-0.0270656	-0.0425771	0.0858534	-0.0261643	0.0842489	-0.0373593	0.547973
Skiv2l	-0.0275585	-0.0064765	0.00280058	-0.00682846	-0.0508633	0.0330722	-0.0449156	0.54791
Mkl1	0.0179409	0.0278367	-0.0428413	-0.0429657	-0.00836798	0.0558814	-0.0142314	0.547669
Kctd9	-0.00376674	-0.000437704	-0.0219434	0.0116989	0.00490479	0.0118073	-0.0126431	0.547551
Mrm1	-0.010309	0.00352681	0.0057576	0.00519188	-0.0142838	0.0109774	-0.0100197	0.54743
Piga	-0.00496578	-0.00601175	-0.0137636	0.0326712	0.0176949	0.035728	-0.0209664	0.547327
Ccdc136	-0.0164767	0.00350418	0.00423699	-0.0571269	-0.0108338	0.0341819	-0.0224625	0.547157
Rae1	-0.10493	0.0259474	0.0435903	0.0232009	-0.00585407	0.00876335	-0.0308024	0.547094
Pgam5	-0.00609559	0.00302794	0.018238	-0.0202025	-0.0295687	0.0590851	0.0120486	0.547073
Mlkl	-0.0346104	-0.0502912	0.0455411	-0.0541032	-0.0979005	0.199076	-0.0772758	0.546876
Zmym3	-0.0269797	0.00430473	-0.0200995	0.054349	0.0351951	0.0262519	-0.00541576	0.546823
Ccdc115	-0.00345611	-0.0184333	-0.0146825	-0.0397491	-0.0259311	0.0537391	-0.0289348	0.546706
Cct4	-0.0570834	-0.00900671	0.0530727	0.0113265	-0.10269	0.158089	-0.141535	0.546527
Uqcrfs1	0.00190759	0.00471185	0.00204095	0.142865	-0.0504734	0.20156	-0.0743829	0.546516
Mex3a	-0.109795	-0.00621499	0.0462808	0.0407245	-0.0182162	0.0444719	0.0428448	0.546473
Cog4	-0.034581	-0.0161973	0.0114557	0.0577908	0.00968174	0.0496082	-0.019746	0.546424
Tefm	-0.0133004	-0.00988689	0.0218787	-0.0029411	-0.00451597	0.0384269	-0.017435	0.546411
Prelid3b	0.0466129	0.0113479	0.013992	-0.00950048	-0.0256518	0.191793	-0.0536042	0.546366
1110008L16Rik	-0.0151447	0.00920007	0.00019439	-0.0313628	-0.0194334	0.0109336	-0.0099938	0.546315
Kntc1	-0.00776134	-0.000473786	0.00760205	-0.0055345	0.0188456	0.0162515	-0.010691	0.546282
Mindy2	0.00850314	-0.0221274	-0.105762	0.0107457	-0.019468	0.0882967	-0.011342	0.546074
2300009A05Rik	-0.0500734	0.0098447	0.0206078	-0.047302	0.0390449	0.0247945	-0.0500094	0.545687
Ugp2	-0.062291	-0.0355204	0.0616711	-0.00505797	-0.0461317	0.0978973	-0.0360918	0.545489
Sema6b	-0.00661424	-0.00618123	0.0109968	-0.0105811	-0.014758	0.0340279	-0.0176383	0.54531
P4ha2	-0.035231	0.00935827	-0.113856	-0.0561788	0.131161	0.066612	0.00148792	0.545254
Nat6	-0.0189881	-0.0122556	0.00736991	-0.00171443	0.00744928	0.0167674	-0.0237815	0.545175
Stk16	-0.043454	-0.0240881	0.0564769	0.0233455	-0.0255453	0.0898116	-0.0120383	0.545102
Grpel1	-0.0301092	-0.00308294	0.0729257	0.0357444	0.00608574	0.122524	-0.0759572	0.545067
5430403G16Rik	-0.00406226	-0.000915334	0.00293389	0.00166249	-0.000750254	0.00440126	-0.00563236	0.544814
Ppp4r2	-0.0261586	0.00653621	-0.0159025	0.00492404	0.120756	0.0668028	-0.0383929	0.544573
Supt3	-0.0267286	0.0147674	-0.0113148	-0.00020319	-0.0221132	-0.00431113	0.00213944	0.544324
Nr4a1	-0.487638	0.166819	-0.61881	0.237468	0.224938	0.0636984	0.365347	0.543987
Cmas	-0.00844948	-0.00188882	0.0109716	-0.0390528	-0.037604	0.0611307	-0.0237404	0.543969
Pold1	-0.0375999	0.0193619	0.0212558	0.0292498	-0.00524914	0.014348	-0.0173059	0.543938
Nup155	-0.0340569	0.0147641	-0.0403999	0.0224546	0.00519863	-0.00384334	0.0018114	0.543898
Gdap2	-0.00492453	0.0116098	-0.00797256	0.01076	-0.0261158	0.0211622	-0.0179639	0.543199
Mapk7	-0.0283055	-0.0051423	0.00517659	0.0023022	-0.0132841	0.00168288	-0.0180693	0.543154
Scrib	-0.00549671	-0.0100803	0.0176778	0.00417663	0.00169924	0.0388864	-0.00850047	0.543144
Sh3pxd2b	-0.0184779	-0.0251022	-0.00624152	-0.0728719	-0.0158135	0.0605618	-0.0426633	0.543096
Isy1	-0.0298406	-0.00311236	0.0146704	-0.061721	-0.0911793	0.0912054	-0.0368293	0.543018
Setd5	-0.0364774	0.0450376	-0.0311114	-0.0307985	-0.0310433	-0.00553965	-0.0611739	0.542791
Dhx37	-0.0186121	0.00260713	0.0089312	-0.0264688	0.0241563	0.0177076	-0.00355662	0.542477
Syde1	-0.0204226	0.00773561	-0.0145229	0.00150693	-0.0216728	-0.00129536	0.00371612	0.542438
Cenps	0.0155873	0.0346023	0.00730999	-0.0107582	-0.011912	0.0652347	-0.0442307	0.542313
Mrps11	-0.0274949	0.0254754	-0.0212491	0.0150878	0.0215119	0.000577046	0.0179743	0.542192
Lamb1	0.00910316	0.000129867	-0.149839	-0.0861743	0.0449994	0.101497	-0.00492336	0.542167
Laptm4b	-0.0430831	-0.00558755	-0.0178357	-0.0533442	0.0202641	0.0173059	0.0273524	0.541982
Lrrc57	-0.00322314	-0.011776	0.00291182	0.00596804	-0.0243383	0.0498125	0.00245602	0.541819
Rgs19	-0.0299755	0.0425327	0.0213408	0.00791936	-0.0377698	0.0282173	-0.0395085	0.541817
Fance	-0.032793	-0.00401592	0.0400555	0.00485775	0.0105039	0.0362641	-0.0142401	0.541676
Rab12	-0.0981445	0.017849	-0.000632931	0.0067904	0.0182449	-0.0186044	-0.0124758	0.541621
Bcl2l2	-0.0143327	-0.0115774	0.0182454	-0.0230701	0.0195698	0.0400855	-0.0156461	0.541502
Coro1c	-0.0638701	0.0194405	0.0280387	-0.0326938	-0.0152515	0.00704746	0.00185488	0.541431
Vkorc1l1	-0.0463644	0.0136371	0.0326628	-0.0684105	-0.0428787	0.0518442	0.00729359	0.541263
Ftsj3	-0.0322612	0.0294865	0.0225248	0.0204785	-0.0981992	0.0844972	-0.0154057	0.541238
Bcas3	-0.0051921	0.0206966	-0.0104638	0.0150624	-0.0153374	0.011633	-0.00937784	0.541164
Ppp4r3a	0.0137337	-0.0334867	-0.0689742	0.00772088	-0.0177173	0.101902	-0.0109351	0.541034
Gtf3c2	-0.0811016	-0.0171894	0.0444307	0.00370446	-0.00404771	0.028373	-0.035724	0.540927
Kif21a	0.00291159	-0.024706	-0.032811	0.0433158	-0.0100799	0.0816766	-0.0198047	0.540491
H2-M3	-0.0280008	0.0369253	0.00407127	0.0218857	0.062996	0.0158894	-0.00723837	0.540455
Khsrp	-0.0678562	-0.049746	0.00734803	0.00545614	-0.0319494	0.0732986	0.0548973	0.540005
Fen1	-0.0346419	0.020413	0.00931924	-0.00499229	-0.041587	0.0126527	-0.000257507	0.539973
Phldb1	-0.0211701	0.00614504	-0.0315646	0.00865315	-0.0560948	0.0230904	-0.00210544	0.539784
Arhgef7	0.0231345	-0.017746	-0.0401968	-0.000720325	-0.0600882	0.139308	-0.0238384	0.539756
Dpm1	-0.0728288	0.00168853	-0.0211189	0.0518538	0.029047	0.0176161	0.0444486	0.539683
Dock4	-0.0102233	0.0150813	-0.024762	-0.00922782	-0.00438174	-0.00196935	-0.000857338	0.539316
Ero1l	0.0321527	-0.108556	-0.53704	0.142958	-0.0833184	0.45903	-0.332321	0.539221
Pear1	-0.0262652	-0.00680736	-0.0510971	-0.0129648	0.012026	0.00375559	0.0118754	0.539061
Necap2	-0.0483526	0.00962415	-0.00477654	-0.0374248	-0.0226636	0.00120463	0.0200364	0.538973
Rnaset2a	-0.065098	-0.00565193	0.0140175	0.00670639	0.0537935	0.0215833	0.0265752	0.538637
Uck1	-0.044303	0.011809	-0.0014226	0.0012537	-0.0496934	0.00274879	-0.0254342	0.538577
Spsb3	-0.0567202	0.00568488	0.0381607	-0.016707	-0.0235716	0.020738	-0.0103443	0.538271
Tmem165	-0.0195419	0.0421451	-0.0378708	-0.0350603	0.0700067	0.0337008	-0.0702172	0.538164
Rgma	-0.032792	0.00697734	0.00459797	0.0139841	-0.0124254	0.0018675	0.00163334	0.538044
Tmem189	-0.0109692	-0.00148128	-0.00493996	-0.065296	0.0182782	0.0466306	-0.0212528	0.537742
A130051J06Rik	0.00255433	-0.0133184	-0.0154142	-0.015286	-0.0193621	0.0571215	0.0181223	0.537611
Dcaf11	0.00198238	0.0267408	-0.0158039	-0.0203017	-0.0209228	0.0222581	-0.0205785	0.537392
Adh5	0.0465308	-0.00930727	-0.151981	0.0438371	-0.0106008	0.183064	0.0188642	0.537112
Bag5	-0.0487918	-0.000374664	-0.0745499	0.0904609	0.108063	0.062622	0.0163411	0.537034
Tiam1	0.00469772	0.00151006	-0.1054	-0.0196236	0.00656003	0.0730458	0.0405447	0.536756
Rbm22	-0.0399948	-0.021962	0.0405312	-0.0828757	-0.00622118	0.0860743	-0.0180868	0.536657
Taldo1	-0.0196163	-0.00343531	0.0408899	-0.0345391	-0.114842	0.171708	-0.0782528	0.536572
Ssu72	-0.0972616	-0.0157342	0.0291799	0.0190877	-0.0299014	0.013087	-0.0275726	0.536089
Sfi1	-0.0029919	-0.00272261	0.000689688	-0.0201774	-0.011387	0.0224575	-0.0139594	0.535428
Tfap4	-0.0309858	0.0216704	0.0146883	-0.0301972	0.00442483	0.00565444	-0.00949982	0.535361
Rpl26	0.0184776	-0.00666113	-0.025077	-0.0783044	-0.0595692	0.1437	-0.0581684	0.535169
Nectin3	-0.00221039	0.0276802	-0.0652285	0.0920287	-0.0341677	0.0802167	-0.0270676	0.535168
Borcs6	-0.00918508	-0.0167988	0.00986504	0.0130784	-0.0173601	0.0480831	-0.0142622	0.535061
Fam114a2	-0.0182219	-0.000934454	-0.0133952	-0.0294022	-0.0603961	0.0412468	-0.0638289	0.535025
Nfyc	0.00795796	-0.00264232	-0.00132377	0.0161568	-0.0150531	0.0504375	-0.0112708	0.534887
Tmed1	-0.00274062	-0.0210488	-0.00590125	-0.0101249	-0.0402498	0.0773847	-0.0467299	0.534795
Npepps	-0.0313667	-0.0153512	-0.00847644	0.0649327	-0.000856903	0.0588923	-0.0586031	0.534533
Fmnl1	-0.00296642	0.00205813	-0.0120975	-0.0979946	-0.0146883	0.085743	-0.0133569	0.534489
Ift27	-0.0278665	0.0200344	-0.0632793	-0.00770809	0.0155922	0.00651024	0.0281459	0.534352
Sh3bgrl	0.0504509	-0.0132385	-0.0166355	0.00617683	0.0272587	0.166854	0.0423938	0.534292
Rangap1	0.0131532	0.00961915	-0.0280897	-0.0219883	0.0447088	0.0718658	-0.0634642	0.534273
Nelfb	-0.00562006	0.000730377	0.0124966	0.0050212	0.0214206	0.0346838	-0.0317268	0.533876
Dusp10	-0.057474	0.00603636	-0.0974481	-0.021641	0.0750446	0.0263732	0.0527176	0.533691
Elf1	-0.0679701	0.0237394	-0.104121	0.0498842	0.0662803	0.00736135	-0.00115674	0.533503
Inf2	-0.0181621	-0.0155954	-0.0846401	0.00390038	-0.0508335	0.084401	0.0662526	0.533281
Zfp451	-0.0238106	0.0199414	-0.0196207	0.0199815	-0.0045125	-0.000272545	-0.0299058	0.533278
Cops3	-0.0452675	0.0456479	0.0286537	0.0564913	-0.0310854	0.0529851	-0.080617	0.533196
Atp2a2	-0.0647106	0.00335748	-0.0219189	-0.0641997	0.0541817	0.00576246	0.00199387	0.532977
Ctps	-0.0422365	0.0118003	0.0561751	-0.0151772	0.00866348	0.0403802	0.00300532	0.53284
Fkbp1b	-0.0503658	0.018578	-0.0543197	0.0383287	0.00865416	0.00975726	0.0430586	0.532743
Tatdn2	-0.0196778	0.0200819	-0.0173924	0.0392064	0.0301148	0.0140544	-0.0194126	0.532556
Rhobtb2	0.0318688	-0.0379245	-0.0263717	0.000689265	0.0563869	0.15852	-0.0358132	0.532172
4933404O12Rik	-0.000929293	0.00449693	-0.000685189	0.0126957	-0.0192408	0.0259848	-0.0109759	0.532148
Naa30	-0.0242295	-0.00171525	-0.00394467	0.0183157	0.00396281	0.00322498	-0.0163427	0.531922
Miga2	-0.00962403	-0.00629637	0.00239808	0.00984042	-0.00641352	0.0113997	-0.00242508	0.531426
Etv1	0.0196076	0.0045318	-0.0834054	-0.059115	-0.0588076	0.112428	-0.108297	0.531334
1190002N15Rik	-0.0129526	-0.0207809	0.0010268	-0.0141332	-0.0181754	0.0303068	-0.00295047	0.531317
Gm16685	-0.00465149	0.00654027	-0.0235924	0.0239082	0.0172363	0.0158409	-0.00938343	0.530995
Idh1	0.0093246	-0.0611274	-0.0200601	-0.0361561	-0.0723145	0.197215	-0.0166692	0.530536
Ipo13	-0.024199	-0.00856905	0.0159511	0.00067264	-0.0128301	0.0219402	0.010857	0.530434
Nup133	-0.00754112	-0.0125401	0.00195186	0.0161608	-0.0291691	0.0564513	-0.0374902	0.530314
Zfp938	-0.0350948	0.0411802	-0.0288782	-0.00594882	-0.0592474	0.00184052	-0.0307195	0.530046
Pcsk7	-0.0234793	0.000274052	0.0134908	0.0242845	-0.0147334	0.0210626	-0.0143019	0.529975
Htatip2	-0.0124837	0.0269412	0.01385	-0.0754715	-0.0175282	0.0552586	-0.0142583	0.529913
Rpl9	0.0020306	-0.0433852	-0.00798864	-0.0286407	-0.0477673	0.128132	-0.0293516	0.529831
Cln6	-0.00158387	-0.0282491	0.010815	-0.0441403	0.0417158	0.0960891	-0.0163829	0.529352
Zfp959	-0.0102705	0.000640445	-0.0141635	0.0154239	-0.0157107	0.00988144	-0.016703	0.529023
Pigu	-0.00189573	0.000158435	-0.0197301	0.0015188	-0.029401	0.0255469	-1.32436e-05	0.528881
Gdap10	-0.011967	-0.00241225	0.00890405	0.0202336	0.00101724	0.0166055	-0.00403724	0.528787
Gabbr1	-0.0422335	0.00990245	0.00747726	-0.0357127	0.017657	0.0118501	0.0259294	0.528563
Cyp2u1	0.00858561	0.00567985	-0.0109023	-0.00225703	-0.00576288	0.0234396	0.00670972	0.528481
Tep1	-0.00325625	0.015596	-0.00513672	0.0396424	-0.0276739	0.0416858	-0.014748	0.528421
G0s2	-0.0834402	-0.0065034	0.0273654	-0.0923305	-0.0974715	0.0444214	-0.0337517	0.528124
Zfp131	-0.07031	0.0237055	0.0117888	0.122445	0.0707198	0.0546743	-0.0337955	0.528034
Dhx16	-0.0223698	-0.0143033	0.0226286	0.0100164	-0.010838	0.0349946	-0.0116406	0.528016
Uckl1	-0.0261222	0.000952702	0.0121281	0.040369	-0.0216871	0.0357675	-0.0277747	0.527611
Arl16	0.00437115	0.0204448	-0.010793	0.0105738	-0.0257179	0.028113	-0.00313468	0.527435
Taf1a	-0.0201756	-0.00921364	0.0144454	0.0202629	0.0039921	0.0219326	3.45792e-05	0.526775
Ctss	-0.0589822	-0.00016175	0.0574894	-0.0618464	-0.0914696	0.0945006	-0.0579233	0.526491
Endov	-0.0214842	0.0219664	0.00698526	-0.000794204	-0.0292083	0.00904939	-0.0113124	0.526173
Otud1	-0.0122825	0.0230183	-0.0304174	-0.0224405	-0.0444501	0.0142632	-0.00249584	0.525538
Ube2e2	-0.0174084	-0.024159	-0.002735	-0.0802443	-0.00186907	0.0699072	-0.00381114	0.525522
Usp20	0.00575881	0.000486441	-0.00568781	0.0012563	0.00893056	0.014966	6.19194e-05	0.525421
Tmem51	-0.0152968	-0.0282047	0.00599587	0.0652528	-0.0174133	0.097015	-0.0386493	0.52534
Zfp948	-0.00286372	0.00887757	-0.00260369	0.0226842	-0.0362756	0.0453689	-0.0256025	0.525326
Gemin6	-0.0142217	0.00743391	0.0218921	0.0306272	-0.0383426	0.0580084	-0.0280031	0.525271
[truncated: 8,500 more rows]
