# Supplementary material for: Clonal transcriptomics identifies mechanisms of chemoresistance and empowers rational design of combination therapies
Source: bioRxiv preprint, doi:10.1101/2021.12.09.471927, version 2 (2022-06-10)
Supplement: Supplementary Table 9 [file 471927_file11.xlsx]

## Sheet: Clone118_FindMarkers_by_sample
gene	logFC.DV1	adj.p.DV1	logFC.DV2	adj.p.DV2	logFC.DV3	adj.p.DV3	fisher.combined.pvalue	mean.logFC
0610009B22Rik	-0.0299691	1	-0.0254915	1	-0.0315283	1	1	-0.0289963
0610009O20Rik	-0.00949141	1	-0.00676058	1	-0.037373	1	1	-0.017875
0610010F05Rik	0.0167275	1	-0.0296788	1	-0.0213419	1	1	-0.011431
0610010K14Rik	-0.00249089	1	-0.0191939	1	-0.0504874	1	1	-0.0240574
0610012G03Rik	-0.000331629	1	-0.0302842	1	0.0405621	1	1	0.00331543
0610030E20Rik	-0.0144814	1	-0.00614373	1	-0.010531	1	1	-0.0103854
0610037L13Rik	0.0434129	1	0.0898272	1	0.0064721	1	1	0.0465707
1110002L01Rik	-0.0073621	1	0.000915514	1	-0.00463808	1	1	-0.00369489
1110004E09Rik	-0.0221809	1	-0.00104906	1	-0.0739217	1	1	-0.0323839
1110004F10Rik	-0.00116053	1	-0.00313139	1	-0.045959	1	1	-0.0167503
1110008F13Rik	-0.0410346	1	-0.0787992	1	-0.0449891	1	1	-0.054941
1110008L16Rik	0.000477545	1	0.00864501	1	0.00543182	1	1	0.00485146
1110008P14Rik	0.0591816	1	0.0595348	1	0.139315	0.598381	0.984566	0.0860106
1110012L19Rik	0.0441065	1	-0.0943676	1	0.00317081	1	1	-0.0156968
1110032A03Rik	-0.0144343	1	0.0152158	1	-0.0141501	1	1	-0.0044562
1110038F14Rik	-0.00786411	1	0.0197757	1	-0.019935	1	1	-0.00267446
1110046J04Rik	-0.0221564	1	-0.049677	1	-0.0357049	1	1	-0.0358461
1110059E24Rik	0.0141659	1	0.00423363	1	0.0284652	1	1	0.0156216
1110059G10Rik	-0.00705848	1	-0.0303952	1	0.00664364	1	1	-0.01027
1110065P20Rik	0.0620036	1	0.129568	0.775535	-0.0106691	1	0.997735	0.0603007
1190002N15Rik	0.0215907	1	0.0181389	1	-0.000347921	1	1	0.0131272
1190007I07Rik	-0.00648776	1	-0.0165616	1	-0.0388362	1	1	-0.0206285
1300002E11Rik	0.0122122	1	-0.00563213	1	-0.00129518	1	1	0.00176164
1500011B03Rik	0.0346064	1	0.0537068	1	0.0532206	1	1	0.0471779
1500011K16Rik	-0.0161229	1	0.00986586	1	-0.0137309	1	1	-0.00666263
1600002K03Rik	-0.0013299	1	0.0125431	1	0.00623989	1	1	0.00581771
1600012H06Rik	0.0433935	1	0.0767703	0.916131	0.0548787	1	0.999895	0.0583475
1600020E01Rik	-0.00480579	1	0.00744507	1	0.0189822	1	1	0.00720717
1700012B09Rik	0.0116361	1	0.0825737	1	-0.158825	1	1	-0.0215385
1700017B05Rik	0.0371829	1	0.0276454	1	-0.00114883	1	1	0.0212265
1700020I14Rik	-0.0194261	1	-0.0798912	1	-0.0532247	1	1	-0.0508473
1700021F05Rik	0.0236609	1	0.0228591	1	0.0200892	1	1	0.022203
1700025G04Rik	-0.0079117	1	-0.0238931	1	-0.0147012	1	1	-0.015502
1700030K09Rik	-0.0077197	1	0.00434288	1	0.0167272	1	1	0.00445012
1700037H04Rik	-0.0164212	1	-0.0398062	1	-0.0135461	1	1	-0.0232578
1700052K11Rik	-0.0140362	1	-0.0501083	1	-0.0345165	1	1	-0.032887
1700086O06Rik	0.00248773	1	0.0133365	1	-0.000627704	1	1	0.00506551
1700123O20Rik	0.0170415	1	0.027207	1	-0.0104151	1	1	0.0112778
1810009A15Rik	-0.0121058	1	0.0209144	1	0.019118	1	1	0.00930888
1810013L24Rik	-0.0223233	1	-0.0283078	1	-0.00562065	1	1	-0.0187506
1810022K09Rik	-0.0457492	1	-0.134232	1	-0.107225	1	1	-0.0957354
1810030O07Rik	0.0248942	1	-0.101191	1	0.00495444	1	1	-0.0237807
1810032O08Rik	-0.029185	1	-0.0200637	1	-0.03471	1	1	-0.0279862
1810037I17Rik	0.188511	3.43609e-11	0.0869258	1	0.0903415	1	1.08359e-08	0.121926
1810043G02Rik	-0.0198425	1	-0.0315214	1	0.00169517	1	1	-0.0165562
1810055G02Rik	0.0492087	1	0.0409972	1	0.0281626	1	1	0.0394562
1810058I24Rik	0.129442	6.50252e-06	0.118944	1	0.183045	0.161948	0.000115295	0.143811
1810062G17Rik	-0.0159651	1	0.00129874	1	-0.0186903	1	1	-0.0111189
2010107E04Rik	0.0581189	1	0.0601957	1	0.0808131	1	1	0.0663759
2010111I01Rik	-0.10011	1	-0.030392	1	0.00484738	1	1	-0.0418849
2010320M18Rik	0.0174096	1	-0.0086063	1	0.0375972	1	1	0.0154668
2200002D01Rik	0.307799	6.34769e-27	0.290358	3.6722e-10	0.323758	5.71346e-16	9.29554e-48	0.307305
2210016L21Rik	0.0136627	1	-0.0328066	1	-0.000283045	1	1	-0.00647566
2300009A05Rik	0.0140127	1	0.0049036	1	0.0269622	1	1	0.0152929
2310009B15Rik	0.00137023	1	0.0853552	1	0.0113189	1	1	0.0326814
2310011J03Rik	0.00362667	1	-0.0166457	1	0.0134166	1	1	0.000132515
2310022A10Rik	0.001123	1	-0.012402	1	-0.00971191	1	1	-0.00699698
2310022B05Rik	-0.00518422	1	0.0277052	1	-0.00722957	1	1	0.00509715
2310033P09Rik	-0.0201552	1	-0.0779925	1	-0.0251712	1	1	-0.0411063
2310035C23Rik	0.0119213	1	0.0188797	1	0.0186413	1	1	0.0164808
2310039H08Rik	0.0276242	1	0.0729985	1	0.0874774	1	1	0.0627
2310057M21Rik	0.0136653	1	0.0127339	1	-0.0129944	1	1	0.00446826
2310061I04Rik	0.0242599	1	0.0414611	1	-0.00398469	1	1	0.0205788
2410002F23Rik	-0.029852	1	-0.0219645	1	-0.00805637	1	1	-0.0199576
2410004B18Rik	0.0681458	0.280482	0.0491443	1	-0.0142227	1	0.863682	0.0343558
2410015M20Rik	-0.0482595	1	-0.0697814	1	0.0287369	1	1	-0.029768
2410089E03Rik	-0.0187679	1	-0.0591263	1	-0.036879	1	1	-0.0382578
2410131K14Rik	0.00673572	1	0.00131417	1	0.0483549	1	1	0.0188016
2510002D24Rik	-0.0102323	1	-0.00853328	1	0.0108818	1	1	-0.0026279
2510039O18Rik	0.024031	1	0.0441859	1	0.0258576	1	1	0.0313582
2610001J05Rik	0.0141678	1	0.00449436	1	0.0254089	1	1	0.0146903
2610002M06Rik	0.0282633	1	-0.109829	1	-0.0262884	1	1	-0.0359514
2610301B20Rik	0.00271912	1	-0.0215306	1	-0.0424652	1	1	-0.0204256
2610507B11Rik	0.159987	1.59275e-12	0.157747	0.00229507	0.0797834	1	2.14495e-12	0.132506
2610524H06Rik	0.00586488	1	-0.0375038	1	0.049484	1	1	0.00594837
2700016F22Rik	0.00218571	1	0.0368107	1	0.0161303	1	1	0.0183756
2700049A03Rik	0.00801816	1	-0.00602189	1	-0.00959562	1	1	-0.00253312
2700062C07Rik	-0.0203327	1	-0.0559016	1	-0.0318394	1	1	-0.0360246
2700081O15Rik	0.00438327	1	-0.0151761	1	0.0169642	1	1	0.00205712
2700097O09Rik	0.0156961	1	-0.0011088	1	0.0110825	1	1	0.0085566
2810004N23Rik	0.0233142	1	-0.0677895	1	0.0546528	1	1	0.00339253
2810006K23Rik	0.00962039	1	-0.0134198	1	-0.00842763	1	1	-0.00407569
2810403A07Rik	-0.0182124	1	-0.0210413	1	-0.0324182	1	1	-0.0238906
2810474O19Rik	0.027659	1	-0.0622326	1	0.107233	1	1	0.0242197
2900026A02Rik	0.025343	1	0.06128	1	0.00406871	1	1	0.0302306
2900060B14Rik	-0.00121205	1	-0.00725419	1	0.0217881	1	1	0.00444063
2900097C17Rik	-0.0614656	1	-0.152541	1	-0.00187022	1	1	-0.0719591
3010003L21Rik	-0.00821797	1	-0.00286704	1	-0.028166	1	1	-0.0130837
3110002H16Rik	-0.00933686	1	-0.00101082	1	-0.00141204	1	1	-0.00391991
3110009E18Rik	-0.00249673	1	0.00188911	1	0.00944612	1	1	0.00294617
3110040N11Rik	0.0104462	1	-0.0212912	1	-0.00078371	1	1	-0.00387623
3110043O21Rik	0.00709014	1	0.015944	1	-0.00139663	1	1	0.0072125
3110062M04Rik	-0.0105215	1	0.000623223	1	-0.0397637	1	1	-0.016554
3110082I17Rik	-0.000504104	1	0.0250876	1	-0.0752	1	1	-0.0168722
3300005D01Rik	0.0145684	1	0.144486	0.000565479	0.0139539	1	0.0206043	0.0576694
3830403N18Rik	-0.0132125	1	-0.158891	1	-0.219244	1.30851e-05	0.00098738	-0.130449
3830406C13Rik	0.03498	1	0.0321592	1	0.00469753	1	1	0.0239455
4632415L05Rik	-0.00452024	1	-0.0500518	1	-0.0270297	1	1	-0.0272006
4833420G17Rik	-0.0515618	1	-0.0403247	1	-0.04483	1	1	-0.0455722
4833439L19Rik	-0.0270318	1	0.0114923	1	-0.0394601	1	1	-0.0183332
4921524J17Rik	0.0860171	1	0.167678	0.00720458	0.101779	1	0.130406	0.118492
4930402H24Rik	-0.00193839	1	-0.00325243	1	0.0388381	1	1	0.0112158
4930430F08Rik	0.00871343	1	-0.00310267	1	-0.0086284	1	1	-0.00100588
4930453N24Rik	0.0162758	1	0.040455	1	-0.0110416	1	1	0.0152298
4930503L19Rik	-0.0210775	1	-0.041541	1	-0.0259148	1	1	-0.0295111
4930523C07Rik	0.0844769	1	0.239894	8.78621e-07	0.117333	1	9.85595e-05	0.147234
4930579G24Rik	0.0148858	1	0.0300406	1	-0.00346789	1	1	0.0138195
4931406C07Rik	-0.0317924	1	-0.0678161	1	-0.0182098	1	1	-0.0392727
4931406P16Rik	-0.0180507	1	-0.0455484	1	-0.0156088	1	1	-0.0264026
4931428F04Rik	0.0638638	0.362715	0.0542532	1	0.0664201	1	0.91708	0.0615124
4932422M17Rik	0.00685463	1	-0.00590133	1	0.0214228	1	1	0.00745871
4932438A13Rik	-0.0345061	1	-0.0933684	1	-0.0733351	1	1	-0.0670698
4933404O12Rik	-0.00743213	1	-0.0205702	1	-0.019432	1	1	-0.0158114
4933427D14Rik	0.000368573	1	0.00503896	1	-0.0137564	1	1	-0.00278294
4933434E20Rik	0.0335355	1	0.0207998	1	-0.0339733	1	1	0.00678734
5031425E22Rik	0.019236	1	0.00738797	1	-0.00720083	1	1	0.00647439
5031439G07Rik	-0.0180638	1	-0.0396315	1	-0.0645383	1	1	-0.0407445
5033406O09Rik	0.0284462	1	0.000609686	1	0.0199558	1	1	0.0163372
5430416N02Rik	-0.0685835	1	-0.0313941	1	-0.0501032	1	1	-0.0500269
5430421F17Rik	0.0163646	1	0.0200795	1	0.0298953	1	1	0.0221132
5730455P16Rik	-0.0170404	1	-0.0327979	1	-0.00467284	1	1	-0.0181704
5730480H06Rik	-0.00569451	1	-0.00128453	1	0.019605	1	1	0.00420864
5730559C18Rik	0.0117853	1	-0.120998	1	-0.0554635	1	1	-0.054892
5930430L01Rik	0.0109222	1	-0.00902253	1	0.0270927	1	1	0.00966411
6030458C11Rik	-0.0174953	1	-0.0574777	1	-0.00963815	1	1	-0.0282037
8030462N17Rik	-0.0121017	1	-0.0142711	1	-0.0137422	1	1	-0.0133717
9030025P20Rik	0.0380885	1	0.0320125	1	0.0194388	1	1	0.0298466
9030624J02Rik	0.00593596	1	-0.00294164	1	-0.0110769	1	1	-0.0026942
9130401M01Rik	-0.20207	1.39091e-13	-0.177146	0.283536	-0.188467	5.93078e-05	2.0247e-15	-0.189227
9230110C19Rik	-0.0157789	1	0.00688931	1	-0.00379412	1	1	-0.00422792
9430015G10Rik	-0.0132689	1	-0.0127432	1	-0.00409157	1	1	-0.0100345
9430038I01Rik	0.0223865	1	0.0209211	1	0.0345106	1	1	0.0259394
9530068E07Rik	-0.0125902	1	-0.0138916	1	0.0286394	1	1	0.000719194
9930021J03Rik	-0.00545674	1	-0.0255747	1	0.0375915	1	1	0.00218669
A230050P20Rik	-0.0122877	1	-0.0166337	1	-0.012323	1	1	-0.0137481
A330069E16Rik	-0.0269884	1	-0.0286854	1	-0.0690311	1	1	-0.0415683
A430005L14Rik	-0.00694602	1	0.127442	0.0752571	-0.000952763	1	0.521737	0.0398477
A630089N07Rik	-0.00267537	1	-0.000771373	1	-0.0122511	1	1	-0.00523262
AA467197	-0.0765489	1	-0.0632786	1	0.035718	1	1	-0.0347032
Aaas	-0.0171411	1	-0.0158697	1	-0.0376826	1	1	-0.0235645
Aacs	0.0188382	1	0.00103774	1	0.0012111	1	1	0.007029
Aaed1	-0.0236641	1	-0.0288597	1	-0.0443712	1	1	-0.0322983
Aak1	0.0152371	1	0.0129338	1	0.0103292	1	1	0.0128333
Aamdc	0.0345429	1	0.0491588	1	0.057575	1	1	0.0470922
Aamp	-0.00562455	1	0.0142147	1	-0.00405697	1	1	0.00151104
Aar2	-0.0262026	1	-0.0255879	1	-0.00202075	1	1	-0.0179371
Aars	0.0102667	1	0.0879107	1	0.0325425	1	1	0.0435733
Aasdhppt	-0.0856309	1	-0.0717595	1	-0.179469	0.00939235	0.155559	-0.112287
Aatf	-0.0341336	1	-0.125483	1	-0.143255	0.156242	0.715489	-0.100957
Abca1	0.00562735	1	-0.00245509	1	0.03945	1	1	0.0142074
Abca3	0.0303342	1	-0.00644839	1	0.0359828	1	1	0.0199562
Abca5	0.00633453	1	-0.0235314	1	-0.0066311	1	1	-0.00794266
Abcb10	-0.00035362	1	0.0210381	1	-0.00744179	1	1	0.00441422
Abcb7	0.00432953	1	0.0102453	1	-0.00405098	1	1	0.00350795
Abcb8	-0.000398652	1	-0.0139181	1	-0.0237904	1	1	-0.0127024
Abcb9	-0.0280647	1	-0.0253439	1	0.0024119	1	1	-0.0169989
Abcc1	-0.0409596	1	-0.0886926	1	-0.0551207	1	1	-0.0615909
Abcd3	0.00891891	1	-0.0543832	1	-0.0416779	1	1	-0.0290474
Abcd4	-2.83163e-05	1	0.0182099	1	0.0265018	1	1	0.0148945
Abce1	0.051904	1	0.113429	1	0.0947467	1	1	0.0866933
Abcf1	-0.0421737	1	-0.0348814	1	-0.0648926	1	1	-0.0473159
Abcf2	-0.00484511	1	-0.00238111	1	0.0227683	1	1	0.0051807
Abcf3	0.000893397	1	-0.0152827	1	-0.00473989	1	1	-0.0063764
Abcg2	-0.0387106	1	0.0506458	1	0.0159267	1	1	0.00928729
Abhd10	0.0134764	1	-0.000330811	1	-0.0188241	1	1	-0.00189282
Abhd11	-0.0542947	1	-0.0983639	1	-0.0265147	1	1	-0.0597244
Abhd12	-0.0126005	1	-0.0535344	1	-0.00920807	1	1	-0.0251143
Abhd13	-0.0115197	1	-0.0179841	1	-0.00613137	1	1	-0.0118784
Abhd14a	-0.0239939	1	-0.0094218	1	0.00763897	1	1	-0.00859224
Abhd16a	0.0128002	1	-0.00788989	1	-0.0132679	1	1	-0.00278588
Abhd17a	0.0517459	1	0.0219244	1	0.0734062	1	1	0.0490255
Abhd17b	0.0230598	1	0.00512629	1	0.0506239	1	1	0.02627
Abhd17c	-0.0257357	1	-0.0213943	1	-0.0435289	1	1	-0.0302196
Abhd18	-0.0152569	1	-0.0476675	1	0.00426541	1	1	-0.019553
Abhd2	0.0618681	1	0.0780008	1	0.0566511	1	1	0.0655067
Abhd4	0.0164063	1	0.0210732	1	0.00506141	1	1	0.0141803
Abhd5	-0.0218684	1	-0.0492483	1	-0.078665	1	1	-0.0499272
Abhd6	0.0181545	1	-0.00445859	1	0.0106812	1	1	0.0081257
Abhd8	0.172945	1.017e-19	0.0976771	0.135574	0.142758	0.00144526	2.82833e-20	0.137793
Abi1	-0.0787222	1	-0.0798887	1	-0.0615415	1	1	-0.0733842
Abi2	0.0134698	1	-0.0319898	1	-0.0259021	1	1	-0.0148074
Abl1	-0.0363654	1	-0.0539736	1	-0.0244629	1	1	-0.0382673
Abl2	0.0154057	1	0.0429274	1	0.0330015	1	1	0.0304449
Abr	-0.0324655	1	-0.0471091	1	-0.0397684	1	1	-0.039781
Abracl	0.0687444	1	0.0657407	1	0.006595	1	1	0.0470267
Abraxas1	-0.0245562	1	-0.0272804	1	-0.0232064	1	1	-0.0250144
Abraxas2	-0.0193049	1	-0.0266344	1	-0.0338135	1	1	-0.0265843
Abt1	-0.0550866	1	-0.0996089	1	-0.0908046	1	1	-0.0818334
AC127341.3	0.0694866	0.205531	0.132225	0.00270075	0.127124	0.166584	0.00494043	0.109612
AC149090.1	0.00778368	1	-0.027504	1	0.079586	1	1	0.0199552
AC160336.1	-0.179481	1	0.102495	1	-0.347048	0.0553155	0.44719	-0.141345
AC165953.2	0.0253904	1	0.0371616	1	0.030685	1	1	0.031079
AC191865.2	-0.0224717	1	-0.0125836	1	-0.035746	1	1	-0.0236004
Acaa1a	0.0208162	1	-0.00717081	1	0.0273061	1	1	0.0136505
Acaa2	-0.00491116	1	-0.109867	1	-0.0184662	1	1	-0.0444149
Acaca	-0.0037209	1	0.011367	1	-0.042756	1	1	-0.0117033
Acad8	0.000326291	1	0.00462845	1	0.0133406	1	1	0.00609844
Acad9	-0.035376	1	-0.0449776	1	-0.0309032	1	1	-0.0370856
Acadl	-0.0576987	1	-0.0176676	1	-0.00140474	1	1	-0.0255903
Acadm	0.0704314	1	0.0202977	1	-0.0163664	1	1	0.0247876
Acads	-0.0473535	1	-0.0739172	1	-0.0468318	1	1	-0.0560341
Acadsb	-0.00698734	1	-0.018969	1	-0.00703126	1	1	-0.0109959
Acadvl	-0.0155839	1	-0.0594479	1	0.00198348	1	1	-0.0243495
Acap1	-0.0647215	0.495897	-0.101988	1	-0.036669	1	0.965689	-0.0677928
Acap2	0.0342417	1	-0.0291358	1	0.0228468	1	1	0.00931754
Acap3	-0.0123659	1	0.00531433	1	-0.015068	1	1	-0.00737318
Acat1	0.0096037	1	-0.029365	1	-0.0381373	1	1	-0.0192996
Acat2	0.0244126	1	0.0660067	1	0.0384536	1	1	0.0429576
Acbd3	0.035519	1	-0.0304009	1	-0.00699717	1	1	-0.000626369
Acbd4	-0.0108885	1	-0.0456584	1	-0.0227903	1	1	-0.0264457
Acbd5	-0.0227828	1	-0.0591611	1	-0.00196011	1	1	-0.027968
Acbd6	0.0240049	1	-0.110623	1	-0.0510588	1	1	-0.0458924
Acd	0.0468927	1	0.0408053	1	0.0776729	1	1	0.0551236
Acer3	0.0120275	1	-0.0104127	1	0.000548843	1	1	0.00072124
Acin1	-0.0460576	1	-0.0389688	1	-0.0770985	1	1	-0.0540416
Acly	-0.0387744	1	-0.0463732	1	-0.0371656	1	1	-0.0407711
Aco1	0.00017373	1	0.0192613	1	0.00124795	1	1	0.00689434
Aco2	-0.0529685	1	-0.0596856	1	-0.0465911	1	1	-0.0530817
Acot13	-0.066586	1	-0.070012	1	-0.0395892	1	1	-0.0587291
Acot2	-0.00602842	1	-0.0244078	1	-0.0275216	1	1	-0.0193193
Acot7	0.0349709	1	0.140351	0.136216	0.0452558	1	0.678433	0.0735259
Acot8	-0.0343143	1	-0.0140515	1	-0.00206738	1	1	-0.0168111
Acot9	0.0525116	1	-0.120959	1	-0.0312997	1	1	-0.0332491
Acox1	0.0155863	1	0.0215472	1	0.0409502	1	1	0.0260279
Acp1	-0.0319206	1	0.0276252	1	-0.0427826	1	1	-0.0156927
Acp2	-0.018897	1	-0.0365766	1	0.0064844	1	1	-0.0163297
Acp6	0.0579972	0.954764	-0.0146957	1	-0.0175586	1	0.999984	0.00858098
Acsbg1	-0.0339607	1	-0.0278461	1	-0.0434333	1	1	-0.03508
Acsl1	-0.02172	1	-0.00361768	1	-0.0165767	1	1	-0.0139715
Acsl3	0.0570205	1	0.0542405	1	0.0535094	1	1	0.0549235
Acsl4	0.0382871	1	-0.0312213	1	0.0657244	1	1	0.0242634
Acsl5	0.0558339	1	-0.0257828	1	0.0263466	1	1	0.0187992
Acss2	-0.0142462	1	-0.00926914	1	-0.00464756	1	1	-0.00938764
Acta2	-0.0243899	1	0.00862794	1	-0.0938857	1	1	-0.0365492
Actb	-0.0566761	1	-0.0573886	1	-0.0675661	1	1	-0.0605436
Actg1	0.0247016	1	0.097811	1	-0.0529829	1	1	0.0231766
Actl6a	-0.0178887	1	0.0427038	1	-0.0760805	1	1	-0.0170885
Actn1	-0.0728418	1	-0.0238501	1	-0.10083	1	1	-0.0658407
Actn4	-0.0195937	1	0.0117829	1	-0.100512	1	1	-0.0361076
Actr10	0.0264123	1	0.0208672	1	0.0264803	1	1	0.0245866
Actr1a	0.0318374	1	0.0134672	1	0.0646674	1	1	0.0366573
Actr1b	0.00440441	1	0.0506908	1	0.00506025	1	1	0.0200518
Actr2	0.0450034	1	0.06963	1	-0.0150831	1	1	0.0331835
Actr3	0.0215505	1	0.0455154	1	-0.012179	1	1	0.0182956
Actr6	0.00743534	1	0.015731	1	5.68716e-05	1	1	0.00774107
Actr8	-0.00134338	1	-0.020653	1	-0.0146829	1	1	-0.0122264
Acvr1	-0.000364838	1	-0.00638117	1	-0.00239512	1	1	-0.00304704
Acy1	-0.00739741	1	-0.0260599	1	-0.0023038	1	1	-0.0119204
Acyp1	-0.00693921	1	-0.0391833	1	-0.00739777	1	1	-0.0178401
Acyp2	-0.00118386	1	0.0433028	1	0.0215431	1	1	0.0212207
Ada	0.021253	1	-0.00703188	1	0.0144951	1	1	0.00957205
Adam10	-0.00109965	1	-0.0476542	1	-0.000339972	1	1	-0.0163646
Adam15	0.0144917	1	0.0213482	1	0.0411347	1	1	0.0256582
Adam17	0.00861297	1	0.0782058	1	0.0413075	1	1	0.0427087
Adam9	0.0121641	1	0.00345162	1	0.000196796	1	1	0.00527084
Adamts1	0.000557909	1	0.157891	1	0.0795248	1	1	0.0793247
Adamts4	0.186525	8.2596e-05	0.180999	0.0116093	0.177623	1	0.000106314	0.181716
Adamtsl5	0.0261789	1	-0.0102785	1	0.0205925	1	1	0.0121643
Adar	-0.0109616	1	-0.0453575	1	-0.0114072	1	1	-0.0225754
Adarb1	-0.011155	1	-0.0279484	1	0.0147607	1	1	-0.00811424
Adat2	-0.00873115	1	-0.0303314	1	-0.0197632	1	1	-0.0196086
Adck1	-0.00423975	1	0.00530244	1	0.00576631	1	1	0.00227633
Adck5	-0.00562068	1	-0.0221888	1	-0.00266347	1	1	-0.0101577
Adcy3	-0.00955689	1	-0.00718839	1	0.00691032	1	1	-0.00327832
Adcy6	0.00575159	1	-0.0103131	1	0.00341695	1	1	-0.000381507
Adcy7	0.00843438	1	-0.0159077	1	-0.00543026	1	1	-0.00430121
Add1	0.0402333	1	-0.0892011	1	-0.102459	1	1	-0.0504755
Add3	0.00724466	1	-0.0290347	1	-0.0178594	1	1	-0.0132165
Adgra3	0.0377469	1	0.0510958	1	0.00122542	1	1	0.0300227
Adgre5	0.214494	2.01509e-17	0.2527	3.41402e-14	0.176941	3.4685e-05	7.77516e-32	0.214712
Adgrl1	0.00437039	1	-0.00209012	1	0.0146757	1	1	0.00565199
Adgrl3	0.0336122	1	0.107508	1	0.0978782	1	1	0.0796661
Adh5	-0.000617624	1	0.0881308	1	-0.0319532	1	1	0.01852
Adh7	0.0745337	5.76178e-05	0.179381	9.25122e-12	0.0770548	1	3.48904e-13	0.110323
Adi1	0.0151231	1	0.0142362	1	-0.020883	1	1	0.00282545
Adipor1	0.0448486	1	-0.0160829	1	-0.0209548	1	1	0.00260363
Adipor2	-0.0264956	1	-0.0239663	1	-0.00418994	1	1	-0.0182173
Adk	0.0263825	1	0.092995	1	0.0603408	1	1	0.0599061
Adm	0.0132469	1	-0.0571261	1	-0.108522	1	1	-0.0508004
Adnp	-0.0155106	1	-0.0413795	1	0.00161293	1	1	-0.0184257
Ado	-0.0154602	1	-0.0157537	1	-0.0105721	1	1	-0.0139287
Adpgk	-0.034016	1	-0.0125862	1	-0.0297172	1	1	-0.0254398
Adprh	0.0173027	1	0.0215127	1	0.0287893	1	1	0.0225349
Adprhl2	0.00174906	1	0.0121873	1	0.00144419	1	1	0.00512684
Adprm	0.00555124	1	0.00429593	1	-0.0103804	1	1	-0.000177741
Adrb2	0.0305808	1	0.0169605	1	-0.00331469	1	1	0.0147422
Adrm1	-0.103087	1	-0.105874	1	-0.0338112	1	1	-0.080924
Adsl	-0.0514126	1	-0.0202725	1	-0.0421557	1	1	-0.0379469
Adss	-0.043014	1	-0.0130552	1	-0.0704895	1	1	-0.0421862
Adssl1	-0.0950296	1	-0.057237	1	-0.102056	1	1	-0.0847743
Aebp1	-0.344481	1.20833e-19	-0.536895	4.70934e-23	-0.240208	0.000316502	9.74615e-42	-0.373861
Aebp2	-0.0357283	1	-0.0682663	1	-0.00402447	1	1	-0.0360064
Aen	0.0100249	1	0.0290188	1	-0.0401284	1	1	-0.000361541
Aes	0.189169	4.10347e-11	0.16704	0.00719523	0.154757	0.0683855	1.06955e-11	0.170322
Afap1	-0.0526643	1	-0.0299225	1	-0.115623	1	1	-0.0660701
Afdn	0.134324	8.32265e-05	0.158903	0.075206	0.0836973	1	0.00053052	0.125641
Aff1	-0.0198253	1	-0.0323609	1	-0.0105123	1	1	-0.0208995
Aff4	-0.0160071	1	-0.0833821	1	-0.00892276	1	1	-0.036104
Afg3l1	0.0351767	1	-0.0187778	1	0.0488087	1	1	0.0217359
Afg3l2	-0.0167027	1	-0.057132	1	-0.0692181	1	1	-0.0476843
Afp	0.0915138	0.061456	0.144246	0.380525	0.0903664	1	0.276137	0.108709
Aftph	-0.0365005	1	-0.073203	1	-0.0193219	1	1	-0.0430085
Aga	-0.0016467	1	-0.0235895	1	0.0222593	1	1	-0.000992306
Agap1	-0.0287703	1	-0.0394536	1	-0.0705181	1	1	-0.0462473
Agap3	0.0184294	1	-0.0749925	1	-0.0184034	1	1	-0.0249889
Agbl3	-0.0200244	1	-0.0260952	1	-0.0172201	1	1	-0.0211132
Agfg1	0.0193409	1	0.0445835	1	0.0353924	1	1	0.0331056
Agfg2	0.00527861	1	-0.0115362	1	-0.0106828	1	1	-0.00564681
Aggf1	-0.0274896	1	-0.0301457	1	-0.0540143	1	1	-0.0372165
Agk	-0.0192212	1	-0.020229	1	-0.00922186	1	1	-0.016224
Agl	0.0154225	1	-0.0766736	1	-0.0592222	1	1	-0.0401578
Ago1	0.0181593	1	0.0156646	1	0.0541064	1	1	0.0293101
Ago2	-0.0329678	1	-0.0306489	1	-0.0396771	1	1	-0.0344313
Ago3	0.00440274	1	-0.0193468	1	0.0104349	1	1	-0.00150306
Agpat1	0.0509041	1	0.110763	0.00162781	0.0967538	1	0.0456309	0.0861404
Agpat2	-0.0165319	1	-0.0924634	1	-0.0301217	1	1	-0.0463723
Agpat3	0.0411695	1	0.026309	1	0.0258178	1	1	0.0310988
Agpat4	0.134361	1.41232e-09	0.188436	2.44749e-07	0.15219	0.0032892	1.01862e-15	0.158329
Agpat5	-0.081432	1	-0.0864824	1	-0.146811	0.158353	0.719101	-0.104908
Agps	-0.00916247	1	-0.0377754	1	0.00291513	1	1	-0.0146742
Agrn	0.00177702	1	0.121063	0.496654	0.03345	1	0.965875	0.0520967
Agtpbp1	-0.0248113	1	-0.0661513	1	-0.0371619	1	1	-0.0427081
Agtrap	-0.00175578	1	-0.0017926	1	-0.00779575	1	1	-0.00378137
Ahctf1	-0.00102766	1	-0.0391838	1	-0.0700555	1	1	-0.0367557
Ahcyl1	-0.0418191	1	-0.108442	1	-0.0400974	1	1	-0.0634529
Ahcyl2	0.00913839	1	-0.00152404	1	0.0214531	1	1	0.00968915
Ahdc1	0.0105891	1	0.0106421	1	0.0110715	1	1	0.0107676
Ahi1	0.0237135	1	0.00352922	1	-0.00303574	1	1	0.00806898
Ahnak	-0.0239435	1	-0.278119	0.525162	-0.0948364	1	0.97231	-0.1323
Ahnak2	0.0255985	1	-0.0597582	1	0.0462564	1	1	0.0040322
Ahr	-0.0863358	1	-0.108832	1	0.00342065	1	1	-0.0639158
Ahsa1	-0.0447813	1	-0.0269391	1	-0.0488091	1	1	-0.0401765
Ahsa2	0.0474473	1	0.0465974	1	0.042023	1	1	0.0453559
AI314180	0.0021045	1	0.0246883	1	0.000117321	1	1	0.00897003
AI413582	0.153757	3.29297e-12	0.141066	0.0841503	0.170831	0.777503	9.81363e-11	0.155218
AI467606	-0.00939368	1	-0.00218406	1	-0.0212486	1	1	-0.0109421
AI597479	-0.00265146	1	-0.0160147	1	-0.0266668	1	1	-0.015111
AI606181	0.0146275	1	0.0141633	1	0.00378369	1	1	0.0108582
AI837181	0.021669	1	0.0154618	1	0.0206442	1	1	0.0192583
Aida	0.00948231	1	-0.071244	1	-0.00912872	1	1	-0.0236302
Aifm1	0.0364913	1	-0.119235	1	-0.0219188	1	1	-0.0348875
Aifm2	-0.0132625	1	0.00777276	1	-0.0150906	1	1	-0.00686012
Aig1	0.17232	2.17699e-10	0.334571	7.77826e-17	0.264666	6.91403e-10	3.88244e-32	0.257186
Aim2	-0.0118876	1	0.0334168	1	-0.0127628	1	1	0.00292213
Aimp1	-0.00373001	1	0.040992	1	-0.0616227	1	1	-0.00812022
Aimp2	-0.0480897	1	-0.0254167	1	-0.0201895	1	1	-0.031232
Aip	0.0218209	1	-0.016973	1	0.0400714	1	1	0.0149731
Ajuba	0.00350063	1	-0.00464943	1	-0.0231845	1	1	-0.00811111
Ak2	-0.0306995	1	0.0714404	1	-0.0897787	1	1	-0.0163459
Ak4	-0.036901	1	0.0389205	1	-0.019621	1	1	-0.00586718
Ak6	-0.0310622	1	-0.0479096	1	-0.161321	0.0313968	0.328112	-0.0800976
Akap1	-0.0162722	1	-0.015166	1	-0.0200671	1	1	-0.0171684
Akap10	0.00321895	1	-0.028239	1	-0.0108864	1	1	-0.0119688
Akap11	0.0103738	1	-0.024003	1	-0.0168413	1	1	-0.0101568
Akap12	0.0274967	1	0.0058916	1	0.00286689	1	1	0.0120851
Akap13	0.0657742	1	0.0461353	1	0.0841567	1	1	0.0653554
Akap7	0.00716651	1	-0.00257204	1	-0.00927249	1	1	-0.00155934
Akap8	0.046319	1	0.0818709	1	0.0171884	1	1	0.0484594
Akap8l	0.0815809	0.0731573	0.0109342	1	0.0280365	1	0.514635	0.0401839
Akap9	0.0282055	1	-0.120872	1	-0.0487029	1	1	-0.0471231
Akip1	-0.0219435	1	-0.0596508	1	-0.0586521	0.579565	0.981928	-0.0467488
Akirin1	0.0441208	1	0.0859407	1	0.0729063	1	1	0.0676559
Akirin2	0.0358845	1	0.0786082	1	0.0075668	1	1	0.0406865
Akr1a1	0.109557	0.00143946	0.261243	1.13456e-12	0.138025	0.23125	2.51934e-13	0.169608
Akr1b10	-0.0196359	1	-0.0190161	1	-0.00537789	1	1	-0.0146766
Akr1b3	0.15798	1.40633e-06	0.192075	0.0098008	0.15908	1	2.52097e-06	0.169712
Akr1b8	0.0249372	1	0.0507352	1	0.0524532	1	1	0.0427085
Akr1c18	-0.118982	1	0.00368039	1	0.353929	1.89013e-10	5.17947e-08	0.0795422
Akr1e1	-0.0456256	1	-0.0626371	1	-0.00646642	1	1	-0.038243
Akr7a5	-0.00277677	1	-0.0264477	1	-0.0202722	1	1	-0.0164989
Akt1	0.0733844	1	0.111533	1	0.0195538	1	1	0.0681572
Akt1s1	-0.00715754	1	-0.00290639	1	-0.00799734	1	1	-0.00602043
Akt2	0.00602962	1	-0.0077917	1	-0.0221301	1	1	-0.00796407
Akt3	0.0264893	1	0.0400258	1	0.0393276	1	1	0.0352809
Aktip	0.0823512	1.23044e-05	0.0386648	1	0.065449	1	0.000937762	0.062155
Alad	0.0181758	1	0.00821068	1	0.0178425	1	1	0.014743
Alas1	-0.0283504	1	-0.0166739	1	-0.0208727	1	1	-0.0219657
Aldh16a1	0.00890152	1	-0.0483778	1	0.0213644	1	1	-0.00603728
Aldh18a1	0.0150595	1	0.0136803	1	0.00190672	1	1	0.0102155
Aldh1l2	-0.0123625	1	-0.0146164	1	-0.0248824	1	1	-0.0172871
Aldh2	-0.0172361	1	-0.263169	2.32561e-05	-0.0325733	1	0.00159495	-0.104326
Aldh3a2	0.00852026	1	-0.0127803	1	0.000878736	1	1	-0.00112711
Aldh5a1	-0.00159783	1	-0.00810564	1	-0.0484058	1	1	-0.0193698
Aldh7a1	-0.0420257	1	-0.117491	1	-0.0315866	1	1	-0.0637009
Aldh9a1	0.0295767	1	0.0173453	1	-0.00342723	1	1	0.0144983
Aldoa	-0.0823939	1	-0.0430123	1	-0.0715228	1	1	-0.065643
Alg1	-0.00535154	1	0.0141302	1	0.00466889	1	1	0.00448251
Alg10b	0.00319681	1	-0.0195763	1	-0.0275546	1	1	-0.0146447
Alg11	-0.0136926	1	-0.0308142	1	-0.0244164	1	1	-0.0229744
Alg13	0.0370526	1	0.0182374	1	-0.00661059	1	1	0.0162265
Alg14	0.0184344	1	0.0577288	1	0.0320911	1	1	0.0360848
Alg2	0.000532388	1	0.0137293	1	0.000269192	1	1	0.00484363
Alg3	0.00367287	1	-0.00759782	1	0.00245162	1	1	-0.000491112
Alg5	-0.0330676	1	-0.0336615	1	-0.140698	0.279232	0.862669	-0.0691425
Alg6	-0.00871153	1	-0.00638536	1	0.0118205	1	1	-0.00109212
Alg8	-0.0183544	1	-0.0195694	1	-0.0158039	1	1	-0.0179092
Alkbh1	-0.0216738	1	-0.0549229	1	-0.103018	1	1	-0.0598715
Alkbh2	-0.00387141	1	-0.00665147	1	0.0106816	1	1	5.29146e-05
Alkbh3	-0.0522193	1	-0.0726364	1	-0.0261362	1	1	-0.0503306
Alkbh5	0.0115125	1	0.0355018	1	-0.00484947	1	1	0.014055
Alkbh6	-0.0139397	1	0.00045073	1	0.0253105	1	1	0.00394051
Alkbh7	0.0158616	1	0.0132438	1	-0.0133676	1	1	0.00524594
Alkbh8	-0.0210522	1	-0.0437641	1	-0.0481854	1	1	-0.0376672
Alms1	0.022762	1	-0.021631	1	-0.0201413	1	1	-0.00633678
Alyref	0.0318689	1	0.111214	1	-0.0727172	1	1	0.0234551
Amd1	0.0229154	1	-0.0184575	1	-0.0141621	1	1	-0.0032347
Amd2	-0.00597248	1	-0.000716563	1	-0.0468942	1	1	-0.0178611
Amer1	0.00457942	1	-0.082182	1	-0.0075182	1	1	-0.0283736
Amfr	0.0707492	0.259842	0.0379734	1	0.0502845	1	0.845995	0.0530024
Ammecr1	0.0115112	1	-0.0272206	1	-0.0480449	1	1	-0.0212515
Ammecr1l	0.00239934	1	-0.0336438	1	-0.0175421	1	1	-0.0162622
Amn1	-0.013083	1	-0.00466482	1	-0.013233	1	1	-0.0103269
Amot	0.00855081	1	-0.0280994	1	0.00619281	1	1	-0.00445191
Amotl1	-0.0623382	1	-0.0407071	1	-0.0897575	1	1	-0.0642676
Amotl2	-0.0508508	1	-0.0325476	1	-0.034655	1	1	-0.0393511
Ampd2	0.0161212	1	0.0293901	1	-0.0284258	1	1	0.00569516
Amz2	0.012321	1	-0.0358199	1	0.0102315	1	1	-0.00442249
Anapc1	-0.0211645	1	-0.0673383	1	-0.0511504	1	1	-0.046551
Anapc10	0.0059587	1	0.034125	1	0.0146162	1	1	0.0182333
Anapc11	0.0647518	1	0.0633256	1	-0.0180153	1	1	0.0366874
Anapc13	0.000278103	1	-0.00316077	1	-0.00510606	1	1	-0.00266291
Anapc15	0.014162	1	0.0574654	1	0.00279148	1	1	0.0248063
Anapc16	0.00819392	1	0.0311316	1	-0.0195584	1	1	0.00658903
Anapc2	-0.0462529	1	-0.0830601	1	-0.0385815	1	1	-0.0559648
Anapc4	-0.0160273	1	-0.0362874	1	-0.0239032	1	1	-0.0254059
Anapc5	-0.00290811	1	-0.0578107	1	-0.0780972	1	1	-0.046272
Anapc7	-0.00998835	1	-0.00295792	1	0.0273286	1	1	0.00479412
Angel2	0.0193213	1	-0.0528816	1	0.023283	1	1	-0.00342579
Angpt1	0.0218622	1	-0.0137836	1	0.0262436	1	1	0.0114407
Angpt2	0.00358541	1	0.0210222	1	-0.00595997	1	1	0.00621587
Angptl2	-0.0206179	1	-0.033087	1	0.05515	1	1	0.000481692
Angptl4	-0.0156616	1	0.0579944	1	-0.0458563	1	1	-0.0011745
Ank	0.0966531	1	0.112549	1	0.16594	1	1	0.125047
Ankfy1	-0.0301842	1	-0.0387527	1	-0.0303522	1	1	-0.0330964
Ankhd1	-0.00649993	1	-0.0770715	1	-0.0288498	1	1	-0.0374737
Ankib1	-0.00140228	1	-0.0305554	1	-0.0137896	1	1	-0.0152491
Ankle2	0.00677051	1	-0.0502497	1	-0.01191	1	1	-0.0184631
Ankmy1	0.00946418	1	0.0215555	1	0.0532055	1	1	0.0280751
Ankmy2	0.00303875	1	0.00197217	1	-0.0218354	1	1	-0.00560815
Ankra2	-0.0287294	1	-0.0511827	1	-0.0405205	1	1	-0.0401442
Ankrd1	-0.00134794	1	-0.0681649	1	-0.065526	1	1	-0.0450129
Ankrd10	-0.0708747	1	-0.0592209	1	-0.125282	0.686271	0.993276	-0.085126
Ankrd11	0.0337405	1	-0.0344992	1	0.0396032	1	1	0.0129482
Ankrd12	0.0372879	1	-0.0176445	1	0.0424462	1	1	0.0206966
Ankrd13a	0.0269336	1	0.0481502	1	0.00249608	1	1	0.02586
Ankrd13b	-0.00889626	1	-0.0474435	1	-0.0301388	1	1	-0.0288262
Ankrd13c	0.054882	0.89211	0.0567904	1	0.0316823	1	0.999772	0.0477849
Ankrd17	0.0113149	1	-0.0320537	1	-0.00819164	1	1	-0.00964346
Ankrd26	-0.0305583	1	-0.0731289	1	-0.0672061	1	1	-0.0569644
Ankrd27	0.00807937	1	-0.00542466	1	0.00919191	1	1	0.00394887
Ankrd28	-0.0108095	1	0.00013372	1	-0.0148434	1	1	-0.00850639
Ankrd29	0.0172776	1	0.0223259	1	0.0204729	1	1	0.0200255
Ankrd37	0.0260261	1	-0.0665891	1	-0.0677863	1	1	-0.0361164
Ankrd39	0.010851	1	-0.0196559	1	0.005333	1	1	-0.00115729
Ankrd40	-0.00342241	1	-0.0836693	1	-0.0483035	1	1	-0.0451317
Ankrd44	0.0155304	1	0.0137871	1	-0.0171655	1	1	0.00405068
Ankrd49	-0.0327057	1	-0.0375961	1	-0.0735425	1	1	-0.0479481
Ankrd50	0.0252656	1	0.0360245	1	-0.0286599	1	1	0.0108767
Ankrd52	0.0106946	1	0.00610319	1	-0.0272736	1	1	-0.00349194
Ankrd54	-0.0237873	1	-0.0102266	1	-0.0151116	1	1	-0.0163752
Ankrd9	0.0221475	1	0.0216608	1	-0.0671524	1	1	-0.00778136
Anks1	0.0170828	1	0.0259469	1	0.0353806	1	1	0.0261368
Anks1b	0.0454456	0.223153	0.0974233	0.00183296	0.102605	0.101397	0.00257137	0.0818247
Ankzf1	-0.0133689	1	-0.0388422	1	-0.0136904	1	1	-0.0219672
Anln	-0.0433246	1	0.00145313	1	-0.116771	1	1	-0.0528808
Ano10	0.0167331	1	-0.0180524	1	-0.00740903	1	1	-0.00290946
Ano6	-0.0237175	1	-0.0241167	1	-0.0318241	1	1	-0.0265528
Ano8	0.000922175	1	0.0202164	1	0.00642795	1	1	0.00918883
Anp32a	-0.0573391	1	-0.0497086	1	-0.055463	1	1	-0.0541702
Anp32b	-0.00347294	1	0.14652	1	-0.115248	1	1	0.00926626
Anp32e	0.0263262	1	0.0303295	1	-0.0839082	1	1	-0.00908416
Antxr1	0.00760716	1	-0.026058	1	-0.00658978	1	1	-0.00834688
Antxr2	0.038188	1	0.0196048	1	0.0688399	1	1	0.0422109
Anxa1	0.124703	0.0384873	0.194679	0.000841938	0.36879	3.26653e-11	6.66827e-13	0.229391
Anxa11	0.00709855	1	0.114325	0.986735	0.0107441	1	1	0.0440559
Anxa2	-0.0894106	1	0.00398072	1	-0.0430244	1	1	-0.0428181
Anxa3	0.0148725	1	0.0807378	1	-0.058266	1	1	0.0124481
Anxa4	-0.0906798	0.610506	-0.192654	0.0797937	-0.112758	0.27865	0.197408	-0.132031
Anxa5	-0.0467398	1	0.12045	0.94281	-0.083956	1	0.999967	-0.00341538
Anxa6	-0.029741	1	0.0524592	1	-0.122199	0.993798	1	-0.0331603
Anxa7	-0.0451236	1	-0.0559029	1	0.0329455	1	1	-0.0226937
Anxa8	0.0817284	1	-0.0361286	1	0.0550619	1	1	0.0335539
Aox1	0.0276919	1	0.0335693	1	0.0326048	1	1	0.0312887
Ap1ar	0.000124749	1	-0.00147686	1	-0.0504402	1	1	-0.0172641
Ap1b1	-0.00596672	1	-0.0443994	1	-0.0271268	1	1	-0.025831
Ap1g1	0.0305085	1	0.01199	1	0.0485887	1	1	0.0303624
Ap1m1	0.0525396	1	0.0771863	1	0.0146959	1	1	0.0481406
Ap1s1	0.0534035	1	0.0243622	1	0.0302492	1	1	0.036005
Ap1s2	0.151695	7.92329e-15	0.0735746	1	0.0232373	1	4.44168e-12	0.0828357
Ap2a1	0.000360444	1	-0.00816545	1	6.15056e-05	1	1	-0.00258117
Ap2a2	-0.0449357	1	-0.06878	1	-0.120395	1	1	-0.078037
Ap2b1	0.000110894	1	-0.0825222	1	-0.0669084	1	1	-0.0497732
Ap2m1	-0.0213776	1	-0.0543155	1	-0.0637311	1	1	-0.0464747
Ap2s1	0.0643654	1	-0.0273413	1	0.0187787	1	1	0.0186009
Ap3b1	-0.0535676	1	-0.0769239	1	-0.0811574	1	1	-0.0705497
Ap3d1	0.0189483	1	-0.0126493	1	-0.0309808	1	1	-0.00822726
Ap3m1	0.0108583	1	0.026204	1	0.00351714	1	1	0.0135265
Ap3s1	-0.0266908	1	-0.132651	1	0.00357034	1	1	-0.0519237
Ap3s2	0.0101883	1	-0.00581679	1	0.00361532	1	1	0.00266226
Ap4m1	-0.00871036	1	-0.0292011	1	-0.0173549	1	1	-0.0184221
Ap4s1	0.0555841	1	0.0922706	0.531832	0.0250077	1	0.973666	0.0576208
Apaf1	0.0182856	1	0.0115886	1	0.0242531	1	1	0.0180424
Apba3	-0.00150342	1	0.01436	1	0.0202093	1	1	0.0110219
Apbb1	0.00700495	1	0.00752379	1	0.0127523	1	1	0.00909369
Apbb1ip	0.00163409	1	0.0769548	1	0.057095	1	1	0.0452279
Apbb2	-0.0288714	1	-0.135811	1	-0.0224092	1	1	-0.062364
Apc	-0.0127778	1	-0.0508359	1	-0.0195682	1	1	-0.0277273
Apeh	0.00319962	1	-0.0524333	1	-0.0254587	1	1	-0.0248975
Apex1	-0.110218	0.530194	-0.0531472	1	-0.0710279	1	0.973338	-0.078131
Apex2	0.00837568	1	-0.0376772	1	-0.00926146	1	1	-0.0128543
Aph1a	0.0353336	1	0.0302825	1	0.0148742	1	1	0.0268301
Aph1b	0.00866819	1	-0.0109618	1	-0.00939845	1	1	-0.00389735
Api5	-0.0663785	1	-0.144963	1	-0.0675937	1	1	-0.0929785
Apip	-0.0392039	1	-0.118714	1	-0.0023142	1	1	-0.0534107
Aplf	-0.0148347	1	-0.0132131	1	0.0206599	1	1	-0.00246263
Aplp2	-0.0224304	1	-0.0924337	1	-0.0134303	1	1	-0.0427648
Apmap	-0.0114741	1	0.00827466	1	-0.00267799	1	1	-0.00195916
Apobec3	-0.0134351	1	-0.0060474	1	-0.0016034	1	1	-0.00702864
Apobr	-0.0645731	0.270978	-0.117911	0.00708376	-0.0509271	1	0.0514866	-0.0778036
Apoe	-0.0365111	1	-0.0822682	1	-0.0855968	1	1	-0.0681254
Apol10b	0.0652714	0.00733077	0.0375117	1	0.052023	1	0.131936	0.051602
Apol9a	-0.0229474	1	0.0201383	1	-0.00695225	1	1	-0.00325376
Apol9b	0.0553039	1	0.0609379	1	0.00454517	1	1	0.0402623
Apoo	0.036356	1	-0.0981083	1	-0.0312357	1	1	-0.030996
Apool	-0.0498994	1	-0.160572	0.141001	-0.0894759	1	0.687775	-0.0999825
Apopt1	-0.0191016	1	0.0245938	1	0.0116675	1	1	0.00571992
App	0.16749	1.25675e-08	0.17621	0.00121859	0.13628	0.564511	3.03394e-09	0.159994
Appbp2	0.00076236	1	-0.0191511	1	-0.0180495	1	1	-0.0121461
Appl1	0.00183217	1	-0.0444471	1	-0.00577256	1	1	-0.0161292
Appl2	0.0184221	1	0.00934185	1	-0.00938136	1	1	0.00612752
Aprt	0.0538908	1	-0.000860599	1	0.071547	1	1	0.0415257
Aptx	-0.0206581	1	0.0063041	1	-0.0264967	1	1	-0.0136169
Aqp5	-0.120155	1	0.0677698	1	-0.237834	0.0835494	0.548357	-0.0967397
Aqr	-0.0421531	1	-0.0785936	1	-0.0564137	1	1	-0.0590535
Araf	0.0402327	1	-0.00163583	1	0.0312219	1	1	0.0232729
Arcn1	0.00574661	1	-0.00117937	1	-0.0243821	1	1	-0.00660495
Areg	-0.11704	1	0.126333	1	0.233814	1	1	0.0810356
Arf1	0.0645756	1	0.185793	1.55276e-07	0.0376414	1	2.16732e-05	0.0960032
Arf2	-0.0110723	1	-0.0129892	1	0.00218456	1	1	-0.00729232
Arf3	-0.0142419	1	0.00473225	1	-0.0186931	1	1	-0.00940091
Arf4	0.0141463	1	0.0676378	1	0.0515294	1	1	0.0444379
Arf5	0.0846338	0.305313	0.0272859	1	0.0352675	1	0.882419	0.0490624
Arf6	-0.168045	2.76571e-06	-0.197168	0.00561754	-0.260679	6.69335e-09	7.43541e-14	-0.20863
Arfgap1	0.00978502	1	-0.00924318	1	-0.0276488	1	1	-0.00903566
Arfgap2	-0.0219242	1	-0.0108484	1	-0.0156755	1	1	-0.0161494
Arfgap3	0.0251602	1	-0.0349492	1	0.0293645	1	1	0.00652519
Arfgef1	-0.0019574	1	-0.0553213	1	0.0126989	1	1	-0.0148599
Arfip1	0.0300206	1	0.0162035	1	0.0137814	1	1	0.0200019
Arfip2	0.00173242	1	0.0252294	1	0.00421076	1	1	0.0103909
Arfrp1	-0.0500989	1	-0.0689725	1	-0.0134204	1	1	-0.0441639
Arglu1	-0.153852	0.000335261	-0.222145	0.017874	-0.150445	0.375828	0.00022195	-0.175481
Arhgap1	-0.0152874	1	-0.0547914	1	-0.00671883	1	1	-0.0255992
Arhgap10	0.0790413	1	0.111458	0.338398	0.0489535	1	0.90371	0.0798177
Arhgap11a	-0.0381459	1	-0.0221694	1	-0.0172889	1	1	-0.0258681
Arhgap12	-0.0188581	1	-0.0466603	1	-0.0207079	1	1	-0.0287421
Arhgap17	-0.0141415	1	-0.0361447	1	-0.0254156	1	1	-0.0252339
Arhgap18	0.0170132	1	0.00155652	1	-0.00942666	1	1	0.0030477
Arhgap19	0.00390976	1	-0.0232231	1	-0.0142568	1	1	-0.0111901
Arhgap21	-0.0415706	1	-0.0532903	1	-0.0217194	1	1	-0.0388601
Arhgap22	0.0338787	1	0.0682327	1	0.0623627	1	1	0.0548247
Arhgap23	-0.144365	1	-0.184855	0.67216	-0.0701605	1	0.99222	-0.133127
Arhgap29	0.0121779	1	0.00961163	1	-0.00915603	1	1	0.00421115
Arhgap31	0.0202048	1	0.0257069	1	0.0312886	1	1	0.0257334
Arhgap35	-0.00431562	1	-0.050131	1	-0.00962665	1	1	-0.0213577
Arhgap42	0.105387	1	0.0153105	1	-0.0256502	1	1	0.0316824
Arhgap5	-0.0381783	1	-0.062596	1	-0.0709354	1	1	-0.0572365
Arhgdia	0.110465	0.000726128	0.160014	0.000110067	0.0523552	1	1.20584e-05	0.107611
Arhgdib	0.138628	0.000138786	0.397292	1.93407e-21	0.0797386	1	4.45062e-22	0.20522
Arhgef1	-0.0388795	1	-0.0365716	1	-0.03617	1	1	-0.037207
Arhgef10l	-0.000799068	1	-0.00362577	1	-0.0223495	1	1	-0.00892479
Arhgef11	-0.00505886	1	-0.0208271	1	-0.0212945	1	1	-0.0157268
Arhgef12	0.0143143	1	-0.00643267	1	0.00540416	1	1	0.00442859
Arhgef17	0.00506584	1	0.056894	1	-0.0134593	1	1	0.0161669
Arhgef18	-0.0121763	1	-0.0198322	1	-0.00929083	1	1	-0.0137664
Arhgef2	-0.0286589	1	-0.0451967	1	-0.128235	1	1	-0.0673636
Arhgef25	-0.0133727	1	-0.0255807	1	-0.0296009	1	1	-0.0228514
Arhgef28	-0.0133651	1	-0.017911	1	-0.0230767	1	1	-0.0181176
Arhgef40	0.0087626	1	0.00680885	1	0.00965312	1	1	0.00840819
Arhgef5	0.0432244	1	-0.0167089	1	0.0455506	1	1	0.024022
Arhgef7	-0.00885116	1	-0.0181783	1	-0.0366144	1	1	-0.0212146
Arid1a	-0.0153856	1	0.0285519	1	-0.0474477	1	1	-0.0114271
Arid1b	0.0496023	0.0306988	0.0367212	1	0.0106569	1	0.323904	0.0323268
Arid2	0.00489735	1	-0.0104151	1	-0.0353532	1	1	-0.0136237
Arid4a	-0.00890826	1	-0.0362585	1	-0.0225519	1	1	-0.0225729
Arid4b	-0.111542	1	-0.225063	0.00783151	-0.110276	1	0.137904	-0.14896
Arid5a	0.0183394	1	0.0542538	1	0.0302417	1	1	0.0342783
Arid5b	-0.0105274	1	0.139888	0.439234	0.0200778	1	0.949255	0.0498127
Arih1	-0.0234801	1	-0.0296137	1	-0.0266944	1	1	-0.0265961
Arih2	0.00226893	1	-0.0249407	1	-0.0334469	1	1	-0.0187062
Arl1	0.0689723	1	0.0515758	1	0.0164134	1	1	0.0456538
Arl13b	0.0104441	1	-0.00842535	1	0.00928652	1	1	0.00376841
Arl14ep	-0.0198268	1	-0.0228362	1	-0.0275363	1	1	-0.0233998
Arl16	0.02235	1	0.0400047	1	0.0141609	1	1	0.0255052
Arl2	0.0166463	1	-0.045362	1	0.0443292	1	1	0.00520449
Arl2bp	0.11607	2.0293e-05	0.159072	0.00539906	0.128374	0.557611	9.50443e-06	0.134505
Arl3	0.119746	6.07623e-07	0.0778546	1	0.183149	2.91548e-05	5.88499e-09	0.126917
Arl4a	0.0121799	1	0.00939183	1	0.00589751	1	1	0.00915641
Arl4c	0.0731107	1	-0.101301	1	0.00871465	1	1	-0.00649198
Arl5a	0.00372736	1	-0.0453378	1	-0.00743206	1	1	-0.0163475
Arl5b	-0.0199773	1	-0.0272669	1	0.0205935	1	1	-0.00888358
Arl6	0.044672	1	0.0542862	1	0.0258954	1	1	0.0416179
Arl6ip1	0.0711687	1	-0.0758243	1	-0.0269027	1	1	-0.0105194
Arl6ip4	0.0429676	1	-0.0127818	1	0.0196627	1	1	0.0166162
Arl6ip5	0.0200255	1	0.120634	1	0.0419953	1	1	0.060885
Arl6ip6	-0.0446087	1	-0.0474602	1	-0.0806623	1	1	-0.0575771
Arl8a	0.00573908	1	-0.129979	1	0.00807054	1	1	-0.038723
Arl8b	-0.017894	1	-0.0438826	1	0.00847956	1	1	-0.0177657
Armc1	-0.00533773	1	-0.0130653	1	-0.027159	1	1	-0.0151873
Armc10	-0.0164397	1	-0.0158913	1	-0.0218501	1	1	-0.0180603
Armc6	0.00861238	1	0.065571	1	0.0347395	1	1	0.0363076
Armc8	-0.0105753	1	-0.0346158	1	-0.0155234	1	1	-0.0202382
Armc9	0.00737874	1	-0.00340549	1	-0.00288927	1	1	0.000361326
Armcx5	0.0210764	1	-0.0214877	1	0.0227369	1	1	0.00744189
Armt1	0.00281836	1	-0.00940634	1	0.0117794	1	1	0.00173046
Arnt	0.0168407	1	0.00910058	1	0.0181229	1	1	0.0146881
Arntl	0.00697362	1	0.0394344	1	0.00900344	1	1	0.0184705
Arpc1a	0.0941905	0.111441	0.0142517	1	0.114222	1	0.624253	0.0742214
Arpc1b	0.0346892	1	0.114063	0.300201	0.112713	0.845441	0.840414	0.087155
Arpc2	0.00803334	1	0.0425048	1	0.0152783	1	1	0.0219388
Arpc3	0.0412776	1	0.0415451	1	0.0655251	1	1	0.0494493
Arpc4	0.0273868	1	0.117289	1	0.0147681	1	1	0.0531481
Arpc5	0.101593	0.000805126	0.0905286	1	0.0673204	1	0.0269748	0.0864808
Arpc5l	-0.0417694	1	-0.0677695	1	-0.025034	1	1	-0.0448576
Arpin	-0.00837023	1	-0.0239827	1	-0.0326805	1	1	-0.0216778
Arpp19	-0.0173967	1	-0.0568988	1	-0.089526	1	1	-0.0546072
Arrb2	-0.00312182	1	-0.0174357	1	-0.0112092	1	1	-0.0105889
Arrdc1	-0.00476306	1	-0.0683599	1	-0.0246865	1	1	-0.0326032
Arsb	0.00619999	1	-0.00955618	1	0.00575792	1	1	0.000800576
Artn	0.00318298	1	0.0407725	1	0.00882355	1	1	0.017593
Arxes2	0.0285744	1	0.0327071	1	-0.00207517	1	1	0.0197354
Asah1	0.0978889	2.08574e-09	0.145164	4.45428e-06	0.0456115	1	5.15873e-12	0.0962215
Asap1	-0.321042	3.21331e-26	-0.479022	2.89178e-23	-0.411094	4.08852e-21	4.77496e-65	-0.403719
Asap2	0.0890516	1	0.16935	0.135628	0.06306	1	0.67726	0.107154
Asb13	-0.0185408	1	-0.0185321	1	-0.011899	1	1	-0.016324
Asb3	-0.00760066	1	-0.0212383	1	-0.00197471	1	1	-0.0102712
Asb6	-0.0113201	1	-0.00698416	1	-0.0161973	1	1	-0.0115005
Asb8	-0.00870556	1	-0.00683939	1	0.00518383	1	1	-0.00345371
Ascc1	0.00333739	1	0.0308432	1	0.0264641	1	1	0.0202149
Ascc2	0.00384699	1	0.0102169	1	0.0139722	1	1	0.00934537
Ascc3	0.00116631	1	0.0209275	1	-0.0195889	1	1	0.000834962
Asf1a	0.0132236	1	-0.00377728	1	-0.00887683	1	1	0.000189819
Asf1b	0.0206222	1	0.0707622	1	0.00641524	1	1	0.0325999
Ash1l	-0.0149338	1	-0.108733	1	-0.0524583	1	1	-0.0587083
Ash2l	-0.0717225	1	-0.0795995	1	-0.0282547	1	1	-0.0598589
Asl	0.0180242	1	-0.0691975	1	-0.0147503	1	1	-0.0219745
Asna1	0.0921964	0.192061	0.146186	1	0.10791	1	0.770376	0.115431
Asns	-0.0523693	1	-0.031677	1	-0.11751	1	1	-0.0671853
Asnsd1	0.00514537	1	-0.00602347	1	-0.00733617	1	1	-0.00273809
Aspa	0.108438	0.0395282	0.163249	0.0120135	0.0641395	1	0.0180131	0.111942
Asph	0.027677	1	0.0939486	1	0.0109135	1	1	0.0441797
Aspm	-0.0189364	1	-0.0470225	1	-0.0358486	1	1	-0.0339358
Aspscr1	0.0187584	1	0.0605864	1	0.0282113	1	1	0.0358521
Asxl1	-0.0390793	1	-0.0695856	1	-0.0578866	1	1	-0.0555172
Asxl2	-0.00571151	1	-0.0618682	1	-0.0223664	1	1	-0.029982
Atad1	0.0383958	1	0.00160934	1	0.0699901	1	1	0.0366651
Atad2	-0.218333	0.0873562	-0.273137	1	-0.265055	0.00634478	0.0202897	-0.252175
Atad2b	0.0453229	1	-0.0098221	1	-0.0396897	1	1	-0.00139632
Atad3a	-0.0620099	1	0.0324347	1	-0.167512	0.0635129	0.479884	-0.0656958
Atad5	-0.013185	1	-0.032818	1	-0.0499306	1	1	-0.0319779
Atat1	-0.0064819	1	-0.0258058	1	0.00197526	1	1	-0.0101041
Ate1	0.0239194	1	0.0119483	1	-0.0111726	1	1	0.00823173
Atf1	-0.0116816	1	-0.0164078	1	-0.0215423	1	1	-0.0165439
Atf2	-0.0272692	1	-0.0732521	1	-0.00929726	1	1	-0.0366062
Atf3	-0.0505973	1	-0.0583855	1	0.177628	1	1	0.0228817
Atf4	-0.0922937	1	-0.0766615	1	-0.0810204	1	1	-0.0833252
Atf5	-0.0308016	1	0.0273076	1	0.0341822	1	1	0.0102294
Atf6	0.0434922	1	0.139131	0.224315	0.0264455	1	0.810175	0.0696894
Atf6b	0.0457726	1	0.048885	1	0.0105058	1	1	0.0350544
Atf7	0.010421	1	0.00834342	1	0.00683532	1	1	0.00853324
Atf7ip	-0.0106427	1	-0.00331258	1	-0.00743685	1	1	-0.00713073
Atg10	-0.0102044	1	-0.0217407	1	-0.0160201	1	1	-0.0159884
Atg101	-0.0037079	1	0.00647251	1	-0.0506991	1	1	-0.0159782
Atg12	-0.0481884	1	-0.0721983	1	-0.0488359	1	1	-0.0564075
Atg13	-0.0167958	1	-0.0090463	1	0.0040454	1	1	-0.00726558
Atg14	-0.00593202	1	0.00364368	1	-0.000165995	1	1	-0.000818112
Atg16l1	-0.012871	1	-0.00517239	1	0.00097023	1	1	-0.00569107
Atg16l2	0.0117275	1	-0.00294847	1	0.017069	1	1	0.00861598
Atg2a	0.00360574	1	-0.00693208	1	0.0240696	1	1	0.00691443
Atg2b	-0.0243847	1	-0.0448948	1	-0.0157013	1	1	-0.0283269
Atg3	0.0515542	1	0.0632947	1	0.0263552	1	1	0.047068
Atg4a	0.00342475	1	-0.0166739	1	0.00468238	1	1	-0.00285558
Atg4b	-0.0150054	1	0.00798866	1	-0.0108345	1	1	-0.00595041
Atg4d	0.0183385	1	0.0137938	1	0.0110476	1	1	0.0143933
Atg5	0.0558247	1	0.0238188	1	0.0518051	1	1	0.0438162
Atg7	-0.00027332	1	-0.00272476	1	0.00507978	1	1	0.000693901
Atg9a	0.00423034	1	0.00899195	1	-0.00631296	1	1	0.00230311
Atic	-0.0535103	1	-0.0805163	1	-0.0550062	1	1	-0.063011
Atl2	-0.00316711	1	0.0172012	1	0.00628392	1	1	0.00677268
Atl3	0.0125608	1	-0.00663538	1	0.0530596	1	1	0.0196617
Atm	-0.0218176	1	-0.0429043	1	-0.00860945	1	1	-0.0244438
Atmin	0.0205777	1	-0.0218365	1	0.0112805	1	1	0.00334056
Atn1	0.00716343	1	-0.0439725	1	-0.0390865	1	1	-0.0252985
Atox1	0.0712644	1	0.0153684	1	0.208731	0.00130766	0.0388128	0.0984545
Atp11a	0.00773147	1	0.0014563	1	0.00421106	1	1	0.00446628
Atp11b	-0.0025071	1	-0.0468395	1	-0.053977	1	1	-0.0344412
Atp11c	0.0132276	1	-0.0378453	1	-0.0255731	1	1	-0.0167303
Atp13a1	0.0363774	1	0.0387063	1	0.0168899	1	1	0.0306579
Atp13a2	0.0150249	1	0.0537098	0.940127	0.0110278	1	0.999963	0.0265875
Atp13a3	-0.032033	1	-0.00649082	1	-0.0471327	1	1	-0.0285522
Atp1a1	0.0552895	1	0.0463619	1	-0.0487882	1	1	0.0176211
Atp1b3	0.0525325	1	0.0137765	1	0.0111087	1	1	0.0258059
Atp23	-0.000912284	1	0.00611463	1	-0.00636884	1	1	-0.000388832
Atp2a2	0.0744919	1	0.0306237	1	0.0232814	1	1	0.042799
Atp2b1	-0.0146489	1	-0.00638613	1	-0.0761207	1	1	-0.0323853
Atp2c1	-0.00586942	1	0.0277014	1	0.0057478	1	1	0.00919326
Atp5a1	-0.118015	0.00167167	-0.169325	0.0264126	-0.169391	0.000142216	1.24472e-06	-0.152244
Atp5b	-0.0482892	1	0.0150253	1	-0.0666239	1	1	-0.0332959
Atp5c1	-0.0931372	0.734847	-0.101122	1	-0.0600718	1	0.996124	-0.0847769
Atp5d	0.0987079	0.000188368	0.119699	0.109959	0.058455	1	0.00144866	0.0922872
Atp5e	-0.0949722	1	0.00146523	1	-0.00145403	1	1	-0.0316537
Atp5f1	0.0214686	1	-0.0634594	1	-0.0985185	0.201086	0.782318	-0.0468364
Atp5g1	-0.0120928	1	-0.00246807	1	0.0258175	1	1	0.00375223
Atp5g2	-0.0842993	0.709448	-0.0269012	1	-0.041598	1	0.994777	-0.0509328
Atp5g3	-0.046991	1	-0.0514163	1	-0.0697576	1	1	-0.056055
Atp5h	0.0159872	1	0.0701203	1	0.076345	1	1	0.0541508
Atp5j	0.0354184	1	0.059197	1	0.0498924	1	1	0.0481693
Atp5j2	0.0734832	0.457778	0.0630614	1	0.0390139	1	0.955218	0.0585195
Atp5k	0.0732332	0.739606	0.0735272	1	0.0372445	1	0.996346	0.061335
Atp5l	0.0505598	1	0.0763321	1	0.0373977	1	1	0.0547632
Atp5o.1	-0.00771977	1	0.0599175	1	-0.0386433	1	1	0.00451812
Atp5s	-0.00366866	1	-0.0350787	1	-0.00878458	1	1	-0.015844
Atp6ap1	0.067212	1	-0.141596	1	0.0167655	1	1	-0.0192061
Atp6ap2	0.07992	0.240227	-0.0156508	1	-0.00253229	1	0.827138	0.020579
Atp6v0a2	0.0490692	1	-0.00055202	1	0.0222914	1	1	0.0236028
Atp6v0b	0.0164204	1	0.139218	0.0277446	0.000435063	1	0.305462	0.0520245
Atp6v0d1	0.0429804	1	-0.00891737	1	0.0389482	1	1	0.0243371
Atp6v0e	0.30988	7.40133e-40	0.386989	8.10793e-21	0.306993	4.23153e-17	3.89133e-72	0.334621
Atp6v1a	0.014639	1	0.0433956	1	0.00582883	1	1	0.0212878
Atp6v1b2	0.0508637	1	0.0156524	1	0.0679253	1	1	0.0448138
Atp6v1c1	-0.00459134	1	-0.00630476	1	-0.0121949	1	1	-0.007697
Atp6v1d	0.00213632	1	0.00236008	1	0.0111082	1	1	0.00520153
Atp6v1e1	0.0242504	1	0.028751	1	-0.00741361	1	1	0.015196
Atp6v1f	0.048967	1	-0.0206353	1	0.0704054	1	1	0.0329124
Atp6v1g1	0.00118558	1	0.0737227	1	-0.0446846	1	1	0.0100745
Atp6v1h	0.0197642	1	-0.0172238	1	0.000813076	1	1	0.00111785
Atp7a	-0.00190987	1	-0.0868922	1	0.00606282	1	1	-0.0275798
Atp8b2	0.0698576	0.00783848	0.0336459	1	0.0367799	1	0.137986	0.0467611
Atp9b	-0.00445694	1	-0.0278409	1	-0.00814448	1	1	-0.0134808
Atpaf1	0.00268308	1	-0.00223538	1	-0.0208851	1	1	-0.00681247
Atpaf2	-0.0216034	1	0.00669584	1	-0.0197427	1	1	-0.0115501
Atpif1	-0.0309876	1	0.0545934	1	-0.0121186	1	1	0.00382904
Atr	-0.0230277	1	-0.0230699	1	-0.0199629	1	1	-0.0220202
Atraid	-0.055159	1	-0.156012	1	-0.0450746	1	1	-0.0854152
Atrip	-0.00387503	1	-0.033048	1	-0.0185804	1	1	-0.0185011
Atrn	-0.00846479	1	-0.00239886	1	0.0300127	1	1	0.00638302
Atrx	-0.0499172	1	-0.40144	7.9919e-09	-0.144145	1	1.54611e-06	-0.198501
Atxn1	-0.0164545	1	-0.0109248	1	-0.00878034	1	1	-0.0120532
Atxn10	-0.0111061	1	-0.0601074	1	0.024302	1	1	-0.0156372
Atxn1l	0.0119763	1	0.0137693	1	-0.00168678	1	1	0.0080196
Atxn2	0.00478204	1	0.00290813	1	-0.0246365	1	1	-0.00564878
Atxn2l	-0.00370143	1	-0.0136527	1	-0.0726086	1	1	-0.0299876
Atxn3	-0.00711684	1	-0.00665324	1	-0.0101428	1	1	-0.00797097
Atxn7	0.0130141	1	-0.0136004	1	-0.0169892	1	1	-0.00585848
Atxn7l1	-0.0116748	1	-0.0154038	1	-0.0179542	1	1	-0.0150109
Atxn7l2	-0.00535054	1	-0.0137746	1	-0.0442535	1	1	-0.0211262
Atxn7l3	-0.0265507	1	-0.0291256	1	0.010165	1	1	-0.0151704
Atxn7l3b	0.0827918	0.052801	-0.0118502	1	0.0743443	1	0.436486	0.0484286
AU019823	-0.00546412	1	0.0246802	1	-0.0336415	1	1	-0.00480849
AU020206	-0.0156196	1	-0.0266905	1	-0.0205465	1	1	-0.0209522
AU022252	0.0111231	1	0.0134743	1	0.0205496	1	1	0.015049
AU040320	0.00548113	1	0.0318594	1	0.00968095	1	1	0.0156738
Auh	-0.0759315	1	-0.0954861	1	-0.0864089	1	1	-0.0859422
Aunip	-0.00832628	1	0.0182207	1	-0.0414192	1	1	-0.0105082
Aup1	0.0844464	0.691512	0.00755834	1	-0.00805798	1	0.99364	0.0279822
Aurka	-0.0283022	1	-0.0234156	1	-0.0753932	1	1	-0.0423703
Aurkaip1	0.039304	1	0.0954108	1	0.0766489	1	1	0.0704546
Aurkb	-0.00910283	1	-0.0337646	1	-0.101407	1	1	-0.0480915
Aven	0.0250371	1	0.0514372	1	0.00980319	1	1	0.0287592
Avl9	-0.00739673	1	-0.0458707	1	-0.0193223	1	1	-0.0241966
Avpi1	0.186474	5.01224e-09	0.30774	1.55301e-08	0.2859	7.92805e-09	9.93867e-22	0.260038
AW209491	-0.0194961	1	-0.0561055	1	-0.0563926	1	1	-0.0439981
AW549877	-0.0329921	1	-0.047908	1	-0.0496972	1	1	-0.0435324
AW554918	-0.00138781	1	0.00350094	1	-0.00844096	1	1	-0.00210927
Axin1	0.0449556	1	0.0574861	1	0.0252065	1	1	0.0425494
Axin2	0.0556347	0.000363586	0.0692591	1	0.059691	1	0.0146448	0.0615283
Axl	0.0583524	1	0.0931584	1	0.100746	1	1	0.0840856
AY036118	-0.0316958	1	-0.0707377	1	0.0150127	1	1	-0.0291403
Azi2	0.041562	1	0.0416989	1	0.00924728	1	1	0.0308361
Azin1	0.0284989	1	0.0297619	1	-0.00641892	1	1	0.0172806
B230118H07Rik	-0.0440427	1	-0.0812693	1	0.00741748	1	1	-0.0392982
B230219D22Rik	-0.138598	0.000216994	-0.201248	0.0149651	-0.176956	0.0346549	1.63177e-05	-0.172267
B230307C23Rik	-0.00667101	1	-0.0090536	1	-0.015657	1	1	-0.0104605
B230354K17Rik	-0.0415872	1	-0.0167491	1	-0.0497546	1	1	-0.0360303
B2m	-0.0875045	1	0.0625099	1	0.149839	1	1	0.0416149
B3galnt2	-0.0235721	1	-0.058357	1	-0.0389144	1	1	-0.0402812
B3galt6	-0.0167685	1	0.00645135	1	-0.00789413	1	1	-0.00607043
B3gat3	0.0860414	0.0154464	0.0304875	1	0.100846	1	0.214186	0.0724584
B3glct	0.0595698	0.000774438	0.0413869	1	0.051003	1	0.0261917	0.0506532
B3gnt2	-0.0122373	1	-0.0103183	1	-0.0106343	1	1	-0.0110633
B3gnt9	0.0523595	0.00951717	0.0510173	1	0.0630256	1	0.156915	0.0554675
B4galnt1	0.0153411	1	-0.0728738	1	0.000131021	1	1	-0.0191339
B4galt1	-0.0364953	1	-0.044637	1	-0.0365787	1	1	-0.039237
B4galt2	-0.00690562	1	0.00560584	1	0.019849	1	1	0.00618308
B4galt3	0.019201	1	0.00103857	1	-0.0171525	1	1	0.00102905
B4galt5	-0.00761714	1	-0.0190355	1	-0.0393805	1	1	-0.0220111
B4galt6	-0.00199014	1	-0.0143097	1	0.0133626	1	1	-0.000979075
B4galt7	-0.0247546	1	-0.0124946	1	-0.0349786	1	1	-0.024076
B4gat1	0.0292031	1	0.0264908	1	0.0658034	1	1	0.0404991
B930036N10Rik	-0.00669464	1	0.0192827	1	-0.0121744	1	1	0.000137856
B9d1	-0.00749445	1	0.0205447	1	-0.0204707	1	1	-0.0024735
B9d2	-0.00792426	1	0.0175662	1	-0.0158294	1	1	-0.00206249
Babam1	0.0650198	1	0.0498064	1	0.0389756	1	1	0.0512673
Babam2	-0.0265532	1	0.0017986	1	-0.0347112	1	1	-0.019822
Bace1	0.0610434	1	0.0207675	1	-0.00595414	1	1	0.0252856
Bach1	0.0126567	1	-0.0128411	1	0.056764	1	1	0.0188599
Bad	0.0778381	0.120025	0.0453013	1	0.0799792	1	0.644219	0.0677062
Bag1	0.0642689	1	0.159149	0.00245471	0.0988643	1	0.0615354	0.107427
Bag2	-0.011673	1	0.0205506	1	-0.0795229	1	1	-0.0235484
Bag3	0.00285091	1	0.0379067	1	0.036149	1	1	0.0256355
Bag4	-0.00448754	1	-0.00230614	1	-0.027786	1	1	-0.0115266
Bag5	-0.0240955	1	-0.0467226	1	-0.0524098	1	1	-0.0410759
Bag6	-0.0327188	1	0.0246323	1	-0.00106801	1	1	-0.0030515
Bahcc1	-0.0550617	0.211896	-0.0848283	1	-0.0689578	0.349562	0.517744	-0.0696159
Baiap2	-0.005667	1	0.00537618	1	0.0270608	1	1	0.00892332
Bak1	0.139297	5.63657e-11	0.126982	0.629159	0.077417	1	1.11554e-08	0.114565
Banf1	0.0174396	1	0.0551937	1	0.0820986	1	1	0.0515773
Banp	0.00262408	1	-0.0408024	1	0.00460671	1	1	-0.0111905
Bap1	-0.0211848	1	0.00530756	1	-0.0205113	1	1	-0.0121295
Bard1	-0.0131925	1	-0.0111899	1	-0.0068202	1	1	-0.0104009
Bax	-0.0895246	1	-0.189549	0.209068	-0.123628	1	0.792338	-0.134234
Baz1a	-0.0655204	1	0.0521908	1	-0.114016	1	1	-0.0424487
Baz1b	-0.00141832	1	-0.0426704	1	-0.124285	1	1	-0.0561246
Baz2a	-0.00923695	1	-0.0324836	1	-0.00658076	1	1	-0.0161004
Baz2b	-0.0368567	1	-0.0505813	1	-0.0316974	1	1	-0.0397118
Bbc3	-0.0339225	1	-0.0169697	1	-0.0426377	1	1	-0.0311767
Bbip1	0.059127	1	0.0327029	1	0.0484378	1	1	0.0467559
Bbs12	0.00219252	1	-0.006266	1	-0.000750341	1	1	-0.00160794
Bbs5	-0.0200758	1	-0.00182625	1	-0.0226709	1	1	-0.0148577
Bbs7	0.000731543	1	-0.0332825	1	-0.0105737	1	1	-0.0143749
Bbs9	-0.00381028	1	0.00355748	1	-0.0166681	1	1	-0.0056403
Bbx	0.0134217	1	0.0159697	1	-0.00351195	1	1	0.00862645
BC003331	-0.0101187	1	-0.0108243	1	0.0307754	1	1	0.00327748
BC003965	0.0313016	1	0.0555404	1	0.0371176	1	1	0.0413199
BC004004	0.081887	0.00517656	0.0761268	1	0.0970092	1	0.104134	0.0850077
BC005537	-0.0671983	1	-0.0927746	1	-0.069474	1	1	-0.0764823
BC005561	-0.0387322	1	-0.0710444	1	-0.024875	1	1	-0.0448838
BC005624	-0.065385	1	-0.0968399	1	-0.0190254	1	1	-0.0604168
BC017643	-0.00435326	1	-0.0190859	1	0.00271416	1	1	-0.00690835
BC022687	0.00579874	1	0.00538509	1	0.0133425	1	1	0.00817543
BC029722	-0.00505973	1	-0.0437312	1	0.00362551	1	1	-0.0150551
BC031181	0.016492	1	-0.035514	1	0.0236923	1	1	0.00155676
BC051226	0.018535	1	0.0563749	0.579754	0.0398513	1	0.981956	0.0382537
Bcap29	-0.00726325	1	0.00850459	1	-0.071936	1	1	-0.0235649
Bcap31	0.104864	0.273736	-0.254774	3.32838e-07	0.0276401	1	1.354e-05	-0.0407567
Bcar1	0.0218363	1	0.0267174	1	-0.00483801	1	1	0.0145719
Bcar3	0.0175431	1	0.0167294	1	-0.0324037	1	1	0.000622925
Bcas2	0.0347592	1	-0.0155052	1	-0.0935695	1	1	-0.0247718
Bcas3	0.00819854	1	0.00377688	1	0.00151394	1	1	0.00449645
Bcat1	0.00268801	1	0.0701159	1	-0.00530391	1	1	0.0225
Bcat2	-0.00875568	1	-0.00477933	1	-0.0189152	1	1	-0.0108168
Bccip	-0.0104496	1	-0.0237594	1	-0.0551183	1	1	-0.0297758
Bcdin3d	-0.0159026	1	-0.00927293	1	-0.00549881	1	1	-0.0102248
Bckdha	-0.0123308	1	-0.0286628	1	-0.00598665	1	1	-0.0156601
Bckdhb	-0.0153387	1	-0.00547326	1	0.0239723	1	1	0.00105342
Bckdk	-0.0140357	1	0.00569741	1	-0.016846	1	1	-0.00839477
Bcl10	0.0791302	1	0.0989419	1	0.0674589	1	1	0.0818437
Bcl2	-0.0010569	1	-0.0523471	1	0.00261025	1	1	-0.0169313
Bcl2l1	-0.0107318	1	0.0106992	1	-0.0269776	1	1	-0.00900342
Bcl2l11	-0.0506031	1	-0.0649751	1	-0.0111993	1	1	-0.0422592
Bcl2l12	-0.0176434	1	-0.00313984	1	0.00654636	1	1	-0.00474563
Bcl2l13	-0.0080821	1	0.00108465	1	-0.00862049	1	1	-0.00520598
Bcl3	-0.00241885	1	-0.0174074	1	-0.00216132	1	1	-0.0073292
Bcl7a	-0.0150109	1	-0.0227242	1	-0.039751	1	1	-0.0258287
Bcl7b	0.0281578	1	0.0305347	1	0.0442197	1	1	0.034304
Bcl7c	0.0380412	1	-0.0491547	1	-0.0423372	1	1	-0.0178169
Bcl9	0.0161662	1	-0.000489739	1	0.0309206	1	1	0.0155324
Bcl9l	-0.00414795	1	-0.0184522	1	0.00385764	1	1	-0.00624751
Bclaf1	-0.0562233	1	-0.0432076	1	-0.0515688	1	1	-0.0503332
Bclaf3	-0.0331302	1	-0.110491	1	-0.0446066	1	1	-0.0627426
Bcor	0.00164596	1	0.0197372	1	0.00590544	1	1	0.00909619
Bcorl1	-0.0117056	1	-0.0593726	1	-0.0227568	1	1	-0.0312783
Bcr	0.0216595	1	0.0565029	1	0.0164056	1	1	0.0315227
Bcs1l	-0.00994943	1	-0.00988772	1	-0.0262277	1	1	-0.0153549
Bdp1	-0.0728695	1	-0.0957061	1	-0.118673	1	1	-0.0957494
Becn1	-0.0519288	1	-0.0673248	1	-0.0250826	1	1	-0.0481121
Bend6	0.0276035	1	0.0410448	0.517033	0.0151521	1	0.970583	0.0279335
Bend7	-0.0123527	1	-0.0071432	1	0.0108414	1	1	-0.0028848
Bet1	-0.0189445	1	-0.0164358	1	-0.00422619	1	1	-0.0132022
Bet1l	-0.00476595	1	0.0209858	1	-0.0028873	1	1	0.00444417
Bex3	0.135438	0.0245511	-0.00866218	1	-0.0981731	1	0.284251	0.00953424
Bfar	-0.00119939	1	-0.00762529	1	-0.018875	1	1	-0.00923323
Bgn	-0.00481489	1	-0.0509177	1	-0.0335742	1	1	-0.0297689
Bhlhb9	0.0531613	1	-0.045666	1	-0.0216611	1	1	-0.00472194
Bhlhe40	-0.0624813	1	-0.252737	0.523999	-0.138581	1	0.972068	-0.151267
Bicd1	0.0441308	0.0419937	0.012214	1	0.0146315	1	0.38615	0.0236588
Bicd2	-0.059371	1	-0.107167	1	-0.0877448	1	1	-0.0847609
Bicral	-0.0120416	1	-0.00800488	1	-0.0118429	1	1	-0.0106298
Bid	-0.0105997	1	-0.0306981	1	-0.0369984	1	1	-0.0260987
Bin1	-0.0242347	1	0.0158474	1	-0.00286435	1	1	-0.00375055
Bin3	-0.0226759	1	-0.0189119	1	0.00376244	1	1	-0.0126084
Birc2	-0.00711846	1	-0.0391869	1	-0.0182266	1	1	-0.0215107
Birc3	0.00714211	1	-0.00415728	1	-0.0182996	1	1	-0.00510493
Birc5	0.023617	1	0.0453224	1	-0.227292	1	1	-0.052784
Birc6	0.0257804	1	0.0268779	1	0.0283559	1	1	0.0270048
Bivm	-0.00468959	1	-0.0200281	1	-0.00725967	1	1	-0.0106591
Blcap	-0.0433121	1	-0.0607739	1	-0.0392322	1	1	-0.0477728
Blm	-0.016904	1	-0.0192639	1	-0.0114001	1	1	-0.015856
Blmh	0.0280912	1	0.0240541	1	-0.0976348	1	1	-0.0151631
Blnk	0.0265078	1	0.058124	0.00166108	0.0773277	1	0.0463144	0.0539865
Bloc1s1	0.0268861	1	0.0627349	1	-0.00108444	1	1	0.0295122
Bloc1s2	0.0339377	1	0.0219656	1	0.0863398	1	1	0.0474144
Bloc1s4	0.0130292	1	-0.0502961	1	-0.00156182	1	1	-0.0129429
Bloc1s5	-0.0267426	1	-0.0368287	1	-0.0184746	1	1	-0.0273486
Bloc1s6	-0.0235428	1	-0.0492492	1	-0.0328507	1	1	-0.0352142
Blvra	-0.00461225	1	-0.00488673	1	-0.00575723	1	1	-0.0050854
Blvrb	-0.0976411	1	-0.271174	7.29734e-05	-0.0364494	1	0.00407864	-0.135088
Blzf1	0.00301897	1	0.0156755	1	0.0104086	1	1	0.00970102
Bmi1	-0.0184922	1	-0.0890867	1	-0.0221555	1	1	-0.0432448
Bmp1	0.0368475	1	-0.00747424	1	0.046419	1	1	0.0252641
Bmp2k	-0.00330441	1	0.0114029	1	0.0105521	1	1	0.00621683
Bmpr1a	0.0277029	1	0.0284277	1	-0.0175908	1	1	0.0128466
Bmpr2	0.0214516	1	-0.0266821	1	-0.0276097	1	1	-0.0109467
Bms1	-0.0408111	1	-0.0782462	1	-0.0790897	1	1	-0.066049
Bmt2	0.00110797	1	0.0162568	1	0.0126811	1	1	0.0100153
Bnc2	0.0309758	1	0.015508	1	0.011213	1	1	0.0192323
Bnip1	0.0105028	1	0.0225369	1	-0.0176212	1	1	0.0051395
Bnip2	0.0364932	1	-0.00154748	1	-0.0138074	1	1	0.00704613
Bnip3	-0.0547943	1	-0.00976696	1	-0.13086	1	1	-0.0651403
Bnip3l	-0.108596	1	-0.0973525	1	-0.100237	1	1	-0.102062
Boc	0.0335489	0.000130217	0.0664147	2.06783e-08	0.0491134	0.689279	7.29131e-10	0.0496923
Bod1	-0.0771204	1	-0.0842779	1	-0.0280442	1	1	-0.0631475
Bod1l	-0.0312641	1	-0.0833788	1	-0.103726	1	1	-0.0727896
Bok	0.159888	1.55007e-07	0.310942	2.93122e-13	0.232041	0.00163845	1.00501e-19	0.23429
Bola1	-0.124006	0.00838782	-0.131429	1	-0.165915	0.0311737	0.0113151	-0.14045
Bola2	-0.0344089	1	-0.00237605	1	-0.0644598	1	1	-0.0337483
Bola3	0.0176553	1	-0.064069	1	0.00213353	1	1	-0.0147601
Bop1	-0.018988	1	-0.0142998	1	-0.0249269	1	1	-0.0194049
Bora	0.000339896	1	0.0144493	1	-0.000690112	1	1	0.00469968
Borcs5	-0.00485815	1	-0.00661012	1	-0.00884211	1	1	-0.00677013
Borcs6	0.022269	1	-0.00708323	1	0.0230889	1	1	0.0127582
Borcs7	0.0346843	1	0.0544202	1	0.0311998	1	1	0.0401015
Borcs8	0.113946	0.000482049	0.0779752	1	0.178147	0.0017135	9.34199e-05	0.123356
Bpgm	0.0762648	1	0.0153401	1	0.0695307	1	1	0.0537119
Bphl	-0.0581179	1	-0.0799271	1	-0.0787832	1	1	-0.0722761
Bpnt1	0.00144568	1	0.0145971	1	0.00571871	1	1	0.00725384
Bptf	-0.0480993	1	-0.209432	0.178039	-0.0366201	1	0.75041	-0.0980506
Braf	0.00843922	1	0.0194249	1	0.0328941	1	1	0.0202527
Brap	-0.00384374	1	0.00252697	1	-0.00892364	1	1	-0.00341347
Brca1	-0.0172633	1	-0.0584127	1	-0.0173797	1	1	-0.0310186
Brca2	-0.0309533	1	-0.0272489	1	-0.0846357	1	1	-0.0476126
Brcc3	0.0489755	1	-0.127987	1	-0.0137847	1	1	-0.0309321
Brd1	-0.0640929	1	-0.109178	1	-0.0726572	1	1	-0.0819762
Brd2	0.12419	0.00612486	0.197921	0.00072339	0.182306	0.00110849	9.97707e-07	0.168139
Brd3	-0.079449	1	-0.124647	1	-0.106154	1	1	-0.103417
Brd4	0.0735483	1	0.136424	0.762292	0.0339948	1	0.997277	0.0813222
Brd7	0.0656264	1	0.0243467	1	0.154406	0.0370482	0.360324	0.0814597
Brd8	-0.0830008	1	-0.130912	1	-0.135281	1	1	-0.116398
Brd9	-0.0329157	1	-0.049116	1	-0.102951	1	1	-0.0616609
Brf1	0.00744169	1	-0.028017	1	0.0308347	1	1	0.0034198
Brf2	-0.0127445	1	0.0173346	1	-0.0142201	1	1	-0.00320998
Bri3	0.0138615	1	-0.148503	0.408088	-0.0619686	1	0.937756	-0.0655367
Bri3bp	-0.0191466	1	-0.0219012	1	-0.0864511	1	1	-0.0424996
Brip1	-0.0147368	1	-0.00532057	1	-0.0201983	1	1	-0.0134186
Brip1os	0.00458667	1	-0.0111018	1	0.00597089	1	1	-0.000181406
Brix1	-0.0858156	1	-0.0166985	1	-0.0977634	1	1	-0.0667592
Brk1	0.0254339	1	0.0294921	1	0.0158968	1	1	0.0236076
Brms1	0.0234709	1	0.000950744	1	0.0352135	1	1	0.0198784
Brms1l	0.0104406	1	-0.0163252	1	-0.0168666	1	1	-0.00758371
Brox	0.00346904	1	-0.0463072	1	0.00994043	1	1	-0.0109659
Brpf1	-0.0188422	1	-0.0159968	1	-0.0174175	1	1	-0.0174188
Brpf3	0.0153425	1	-0.0181606	1	0.0211926	1	1	0.00612482
Brwd1	-0.00723719	1	0.028131	1	-0.00586521	1	1	0.00500952
Brwd3	0.0101162	1	-0.028754	1	-0.00394856	1	1	-0.00752879
Bscl2	0.0118128	1	-0.0244596	1	0.0231479	1	1	0.00350038
Bsdc1	0.00997516	1	0.0467727	1	0.0157503	1	1	0.0241661
Bsg	0.072125	1	0.0707402	1	0.0294257	1	1	0.0574303
Bsn	-0.0386072	1	-0.0379591	1	-0.0553867	1	1	-0.0439843
Bst2	0.124776	1	0.0458727	1	0.293892	1	1	0.154847
Btaf1	0.0322397	1	-0.0155056	1	0.0574633	1	1	0.0247325
Btbd1	-0.0139051	1	0.0119396	1	-0.00694634	1	1	-0.00297061
Btbd10	0.00829429	1	0.0165067	1	-0.00728	1	1	0.00584034
Btbd2	-0.0383692	1	-0.0309733	1	-0.0486172	1	1	-0.0393199
Btbd3	-0.0147205	1	-0.013789	1	-0.03336	1	1	-0.0206232
Btbd7	0.00660053	1	0.00709815	1	0.00965968	1	1	0.00778612
Btbd9	0.0566232	1	0.0620283	1	0.0694832	1	1	0.0627116
Btd	0.025253	1	0.0262461	1	0.0216778	1	1	0.0243923
Btf3	-0.224013	2.0892e-26	-0.240972	2.00568e-14	-0.334565	1.98196e-33	1.15773e-68	-0.266516
Btf3l4	0.00589612	1	0.0425331	1	-0.00743508	1	1	0.0136647
Btg1	-0.008594	1	-0.0107347	1	0.0305707	1	1	0.00374733
Btg2	-0.0163496	1	-0.1392	1	0.0423882	1	1	-0.0377204
Btg3	0.050092	1	0.079775	1	0.030384	1	1	0.053417
Btrc	-0.00118245	1	-0.0145684	1	0.0285282	1	1	0.00425911
Bub1	-0.0510985	1	-0.105968	1	-0.0778562	1	1	-0.0783074
Bub1b	-0.0391221	1	-0.0362684	1	-0.0471875	1	1	-0.0408593
Bub3	-0.00108767	1	0.0110629	1	-0.0510494	1	1	-0.0136914
Bud13	-0.0271678	1	-0.0363535	1	-0.0324639	1	1	-0.031995
Bud23	-0.00182718	1	-0.0125518	1	-0.0110335	1	1	-0.00847082
Bud31	0.0455063	1	0.0372028	1	0.0254667	1	1	0.0360586
Bvht	0.0034724	1	0.0259041	1	-0.00321533	1	1	0.00872037
Bysl	-0.0207288	1	0.0356997	1	0.000544507	1	1	0.0051718
Bzw1	-0.0386196	1	-0.00418079	1	-0.0452361	1	1	-0.0293455
Bzw2	0.00830237	1	0.0179416	1	-0.114512	1	1	-0.0294226
C030006K11Rik	0.0149893	1	0.0115149	1	0.0176253	1	1	0.0147098
C130013H08Rik	-0.00699809	1	0.0615038	1	-0.0482552	1	1	0.00208349
C130071C03Rik	-0.022132	1	-0.0198908	1	-0.0141728	1	1	-0.0187319
C1d	0.0182548	1	-0.0112645	1	0.0484219	1	1	0.0184707
C1galt1	0.0469981	1	0.0699826	1	0.030678	1	1	0.0492196
C1galt1c1	0.0220525	1	-0.0257353	1	0.00530951	1	1	0.00054222
C1qa	-0.000998721	1	-0.00897172	1	0.0153556	1	1	0.00179504
C1qb	0.00710543	1	-0.0379599	1	0.0224604	1	1	-0.00279803
C1qbp	-0.0844506	1	-0.0724494	1	-0.218994	5.37282e-07	6.42839e-05	-0.125298
C1qc	-0.00718072	1	-0.00712492	1	-0.00739748	1	1	-0.00723437
C1qtnf1	0.0751636	0.123359	0.0567821	1	0.087728	1	0.651615	0.0732246
C2cd2l	0.0136982	1	0.0023232	1	0.00287706	1	1	0.00629948
C330007P06Rik	0.0244177	1	-0.039186	1	-0.0420196	1	1	-0.0189293
C330018D20Rik	-0.0207935	1	-0.0243612	1	0.00171433	1	1	-0.0144801
C330027C09Rik	-0.00126108	1	0.000849833	1	-0.00735182	1	1	-0.00258769
C77080	0.0138759	1	-0.0259261	1	0.00314164	1	1	-0.00296952
C87436	-0.0147796	1	-0.0362072	1	-0.00673103	1	1	-0.0192393
CAAA01118383.1	0.0353076	1	0.0785894	1	0.0622862	1	1	0.0587278
Caap1	0.00752588	1	0.0370136	1	-0.0151143	1	1	0.00980839
Cab39	-0.0144084	1	-0.0208536	1	-0.00199665	1	1	-0.0124195
Cab39l	-0.00353081	1	0.0207326	1	0.0100627	1	1	0.00908818
Cabin1	0.00114081	1	0.0124864	1	-0.0513019	1	1	-0.0125583
Cables2	0.00778802	1	-0.0175563	1	0.00280614	1	1	-0.00232071
Cacfd1	0.0236299	1	0.0220856	1	-0.00617133	1	1	0.0131814
Cachd1	0.00183156	1	0.0397303	1	0.0217617	1	1	0.0211079
Cacna1a	-0.0764053	4.52183e-05	-0.112766	0.0251148	-0.079848	0.162328	2.52061e-05	-0.0896731
Cacna1c	-0.00581908	1	-0.0292688	1	-0.00366739	1	1	-0.0129184
Cacnb3	0.00235552	1	-0.0180369	1	0.0395726	1	1	0.00796373
Cactin	-0.00918505	1	-0.0125148	1	-0.000298672	1	1	-0.00733283
Cacul1	0.0101923	1	-0.0293346	1	0.0034712	1	1	-0.00522369
Cacybp	-0.0296716	1	0.0489718	1	-0.0678069	1	1	-0.0161689
Cad	-0.070875	1	-0.0439891	1	-0.158328	0.0133886	0.195686	-0.0910642
Cadm1	0.0111988	1	-0.0738046	1	-0.099116	1	1	-0.0539073
Calcoco1	-0.0036506	1	-0.0376678	1	-0.00647731	1	1	-0.0159319
Cald1	-0.00370463	1	-0.0293617	1	-0.0500675	1	1	-0.0277113
Calm1	0.0543836	1	0.112227	1	0.0891092	1	1	0.0852399
Calm2	-0.0332474	1	-0.00525129	1	0.00420524	1	1	-0.0114312
Calm3	0.0276762	1	0.0374451	1	0.00732953	1	1	0.0241503
Calr	0.318048	3.26519e-28	0.458592	3.44385e-29	0.38352	1.83824e-23	3.43028e-75	0.38672
Calu	0.130375	0.00446515	0.0953727	1	0.0586862	1	0.0940064	0.0948113
Camk1	-0.0367637	1	-0.116407	1	-0.09746	1	1	-0.0835435
Camk2d	0.0370435	1	0.0847792	1	0.0631104	1	1	0.0616444
Camk2g	-0.00579576	1	0.0504157	1	-0.0173979	1	1	0.00907399
Camk2n1	0.0878933	0.222971	0.242462	8.62931e-09	0.155276	0.0563485	3.11361e-08	0.161877
Camkk2	0.0303965	1	0.0103867	1	-0.00441049	1	1	0.0121242
Caml	-0.104598	0.209424	-0.153686	1	-0.106826	1	0.792774	-0.121704
Camsap1	-0.0447427	1	-0.0795374	1	-0.04687	1	1	-0.05705
Camsap2	0.0345032	1	-0.0423059	1	0.0221141	1	1	0.00477044
Camta1	0.0550611	1	0.0303787	1	0.0526072	1	1	0.0460157
Camta2	-0.00158065	1	0.00921485	1	0.0109006	1	1	0.00617827
Cand1	-0.0139724	1	-0.00380384	1	-0.00939624	1	1	-0.00905749
Cant1	-0.00994451	1	0.00245627	1	0.0104286	1	1	0.000980127
Canx	0.0253749	1	0.0126997	1	0.00873375	1	1	0.0156028
Cap1	0.0804872	1	0.28817	2.23965e-13	0.0932013	1	1.01753e-10	0.153953
Capg	0.0924782	1	0.0601046	1	0.141728	1	1	0.0981036
Capn1	0.0216523	1	0.0172537	1	0.0885137	1	1	0.0424732
Capn10	0.0213752	1	-0.00473106	1	0.00325992	1	1	0.00663469
Capn15	0.0414326	1	0.0409471	1	0.0525131	1	1	0.0449643
Capn2	-0.0125102	1	-0.0129497	1	-0.0246618	1	1	-0.0167073
Capn7	0.0137865	1	-0.0106991	1	-0.0143595	1	1	-0.00375738
Capns1	0.0372713	1	0.0268238	1	0.0772096	1	1	0.0471016
Caprin1	-0.0954807	1	-0.176651	1	-0.0964516	1	1	-0.122861
Capza1	0.0769698	1	0.0565598	1	0.0240195	1	1	0.0525164
Capza2	-0.0246658	1	-0.0867909	1	-0.110343	1	1	-0.0739334
Capzb	0.126825	1.14139e-05	0.300906	1.23108e-17	0.107922	1	1.85086e-19	0.178551
Car12	-0.00989227	1	0.00797332	1	-0.0240199	1	1	-0.00864628
Car13	0.00773186	1	-0.00995848	1	-0.0168334	1	1	-0.00635336
Car5b	0.0609371	1	-0.0326816	1	-0.0639116	1	1	-0.0118853
Car9	0.0757752	1	0.100208	1	0.0555545	1	1	0.0771793
Card19	-0.0966105	1	-0.196524	0.45829	-0.15965	0.242639	0.62367	-0.150928
Carhsp1	-0.0832933	1	-0.026066	1	-0.0479639	1	1	-0.0524411
Carm1	-0.0468798	1	-0.0662164	1	-0.0651791	1	1	-0.0594251
Carmil1	-0.0144556	1	-0.0469602	1	-0.020262	1	1	-0.0272259
Carnmt1	0.11381	0.00350059	0.0680869	1	0.132579	0.758914	0.0651337	0.104825
Cars	-0.0349357	1	-0.06065	1	-0.0908506	1	1	-0.0621454
Cars2	-0.00219307	1	-0.0570526	1	0.00573712	1	1	-0.0178362
Casc1	-0.00681659	1	-0.0433183	1	-0.0218333	1	1	-0.0239894
Casc3	-0.0295592	1	-0.0763269	1	-0.0528043	1	1	-0.0528968
Casc4	0.0977638	0.000354832	0.0475198	1	0.0842402	1	0.0143694	0.0765079
Casd1	0.0115101	1	-0.00330349	1	0.0105538	1	1	0.00625346
Cask	0.0186811	1	0.0102867	1	0.0181649	1	1	0.0157109
Casp1	-0.049073	1	-0.0668682	1	-0.101288	1	1	-0.0724097
Casp12	0.0205819	1	0.0235202	1	0.0159147	1	1	0.0200056
Casp3	-0.0195413	1	-0.0650213	1	-0.0754492	1	1	-0.0533373
Casp6	-0.0024638	1	0.0299478	1	0.0507851	1	1	0.0260897
Casp8	0.0263348	1	-0.00799067	1	-0.021878	1	1	-0.00117796
Casp8ap2	0.015158	1	0.0472596	1	0.0102603	1	1	0.024226
Cast	-0.1683	2.71132e-05	-0.182935	0.952001	-0.124272	1	0.00173896	-0.158502
Cat	-0.0245743	1	0.00726597	1	0.0319142	1	1	0.00486862
Cav1	-0.00218553	1	0.153411	0.0567501	-0.0199146	1	0.453147	0.0437701
Cav2	0.0246849	1	0.0890551	0.468135	-0.00255272	1	0.95829	0.0370624
Cavin1	-0.0475964	1	-0.0577958	1	-0.0662392	1	1	-0.0572105
Cavin2	0.00042438	1	0.0178524	1	-0.0217683	1	1	-0.00116383
Cavin3	-0.0661665	1	-0.0621039	1	-0.0960665	1	1	-0.0747789
Cavin4	0.0255547	1	0.162242	9.25257e-09	0.060935	1	1.76348e-06	0.0829106
Cbfa2t2	-0.0175	1	-0.0154575	1	-0.0299344	1	1	-0.020964
Cbfa2t3	0.055204	0.024366	0.0993085	0.103072	0.0444234	1	0.062556	0.066312
Cbfb	-0.0116973	1	-0.00340197	1	-0.00868136	1	1	-0.00792689
Cbl	0.0244668	1	-0.0332583	1	-0.0151765	1	1	-0.00798929
Cblb	0.00440691	1	-0.0821458	1	-0.0133776	1	1	-0.0303722
Cbll1	-0.0281673	1	-0.0684386	1	-0.0540767	1	1	-0.0502276
Cbr1	0.0137541	1	0.0380633	1	0.0218812	1	1	0.0245662
Cbr3	-0.0385487	1	-0.0713446	1	-0.016981	1	1	-0.0422914
Cbr4	-0.0287001	1	-0.0484407	1	-0.0227497	1	1	-0.0332968
Cbwd1	0.0178153	1	0.0302976	1	-0.00769463	1	1	0.0134727
Cbx1	-0.128167	0.0269978	-0.182739	0.339016	-0.147344	0.13643	0.0375044	-0.15275
Cbx3	-0.100436	0.917937	-0.0780453	1	-0.1452	0.0581496	0.438971	-0.107894
Cbx4	-0.00358037	1	-0.0181912	1	0.029822	1	1	0.00268345
Cbx5	-0.00499888	1	0.0406156	1	-0.00629004	1	1	0.00977555
Cbx6	0.0115717	1	0.00987373	1	0.00778075	1	1	0.00974205
Cby1	0.0304306	1	0.0724002	1	0.0393654	1	1	0.0473987
Cc2d1a	0.0285955	1	0.00758519	1	0.0177812	1	1	0.0179873
Cc2d1b	0.00164036	1	-0.00147407	1	-0.0202805	1	1	-0.00670473
Cc2d2a	0.0073822	1	-0.0254981	1	-0.00625311	1	1	-0.00812302
Ccar1	-0.0354031	1	-0.0134541	1	-0.0906733	1	1	-0.0465102
Ccdc102a	0.0493759	0.162148	0.030364	1	0.0701618	1	0.725463	0.0499672
Ccdc107	0.0351771	1	0.00695617	1	0.0028235	1	1	0.0149856
Ccdc112	0.00719687	1	-0.0187405	1	-0.0388469	1	1	-0.0167969
Ccdc115	0.00377615	1	0.0119954	1	0.0282443	1	1	0.0146719
Ccdc12	0.000186628	1	-0.0619152	1	-0.0270828	1	1	-0.0296038
Ccdc122	-0.00928431	1	-0.0337057	1	0.00242423	1	1	-0.0135219
Ccdc124	0.141066	9.45916e-06	0.2502	4.82615e-09	0.215234	4.53088e-06	2.00529e-16	0.202167
Ccdc126	0.0230561	1	0.0156249	1	0.0259097	1	1	0.0215303
Ccdc127	-0.0942953	1	-0.1212	1	-0.106145	1	1	-0.107213
Ccdc130	0.0174464	1	0.0277827	1	0.0144242	1	1	0.0198844
Ccdc137	-0.00931475	1	-0.00472836	1	-0.06321	1	1	-0.025751
Ccdc15	-0.00206466	1	-0.0101506	1	0.00938052	1	1	-0.000944927
Ccdc163	-0.025903	1	0.0280174	1	-0.0200407	1	1	-0.00597544
Ccdc167	0.0442322	1	0.0668	1	0.0545652	1	1	0.0551991
Ccdc174	-0.0482187	1	-0.0116132	1	-0.0495742	1	1	-0.0364687
Ccdc18	-0.0565568	1	-0.0378708	1	-0.000914211	1	1	-0.0317806
Ccdc181	-0.00253943	1	-0.026756	1	0.00729118	1	1	-0.00733473
Ccdc186	0.0573533	1	0.0411928	1	0.0742882	1	1	0.0576114
Ccdc191	-0.0263419	1	-0.0348894	1	-0.0163306	1	1	-0.025854
Ccdc22	-0.0100767	1	-0.0651909	1	-0.0087402	1	1	-0.0280026
Ccdc25	-0.00221328	1	0.0781781	1	0.0387178	1	1	0.0382275
Ccdc28a	-0.00833648	1	-0.0282871	1	0.025915	1	1	-0.00356954
Ccdc32	-0.0178432	1	0.0118583	1	-0.0277225	1	1	-0.0112358
Ccdc34	-0.139569	0.55256	-0.197554	1	-0.190397	0.028536	0.216968	-0.17584
Ccdc43	-0.0320767	1	-0.0428346	1	-0.0252213	1	1	-0.0333775
Ccdc47	0.00692585	1	-0.0605076	1	-0.0522761	1	1	-0.0352859
Ccdc50	-0.0119725	1	-0.0624418	1	0.00320034	1	1	-0.023738
Ccdc58	-0.0916235	1	0.0270735	1	-0.119976	1	1	-0.0615088
Ccdc59	-0.0195322	1	-0.0424906	1	-0.0556218	1	1	-0.0392148
Ccdc6	-0.0349256	1	-0.0103439	1	0.0133359	1	1	-0.0106446
Ccdc61	-0.00235018	1	0.00252884	1	0.0244072	1	1	0.00819527
Ccdc66	0.0170746	1	0.012449	1	0.0474281	1	1	0.0256506
Ccdc68	-0.0210822	1	-0.058735	1	-0.0405947	1	1	-0.0401373
Ccdc71	-0.0098297	1	-0.0197027	1	-0.0231875	1	1	-0.0175733
Ccdc71l	-0.009505	1	0.0334601	1	-0.046296	1	1	-0.00744696
Ccdc77	-0.0147813	1	-0.00987119	1	0.00540535	1	1	-0.00641572
Ccdc82	-0.0379667	1	-0.0877085	1	-0.0289715	1	1	-0.0515489
Ccdc85b	-0.0127597	1	-0.00570422	1	-0.00798617	1	1	-0.00881669
Ccdc86	-0.00114626	1	-0.0103802	1	-0.0186228	1	1	-0.0100497
Ccdc88a	-0.0127665	1	-0.0157686	1	0.0419926	1	1	0.00448583
Ccdc9	-0.0122144	1	-0.0194993	1	0.00852933	1	1	-0.00772814
Ccdc90b	0.022714	1	-0.00765798	1	-0.0288567	1	1	-0.00460023
Ccdc91	-0.0120041	1	-0.0373906	1	-0.0418508	1	1	-0.0304152
Ccdc93	-0.0030206	1	-0.00801248	1	0.000358363	1	1	-0.00355824
Ccdc94	-0.00739704	1	-0.0201978	1	0.0069621	1	1	-0.00687759
Ccdc97	-0.00779655	1	-0.00597901	1	-4.48008e-05	1	1	-0.00460679
Cchcr1	-0.00395937	1	-0.0482087	1	-0.0287358	1	1	-0.026968
Ccl25	-0.0267805	1	-0.0431887	1	-0.0500473	1	1	-0.0400055
Ccm2	-0.0342774	1	-0.0628468	1	-0.0280132	1	1	-0.0417125
Ccna2	-0.0546658	1	0.00819636	1	-0.218122	0.076679	0.52646	-0.0881971
Ccnb1	-0.0826143	1	-0.119171	1	-0.184178	0.561226	0.979037	-0.128654
Ccnb2	-0.0205203	1	0.0249528	1	-0.083141	1	1	-0.0262362
Ccnc	0.0014437	1	0.0352409	1	0.00482998	1	1	0.0138382
Ccnd1	-0.0122024	1	0.211985	0.212828	0.133796	1	0.796891	0.111193
Ccnd2	0.214426	5.51547e-12	0.238917	0.00132024	0.0968136	1	4.10263e-12	0.183385
Ccnd3	0.0619436	1	0.0526436	1	0.0538033	1	1	0.0561302
Ccndbp1	-0.0235222	1	-0.0211347	1	0.00814437	1	1	-0.0121708
Ccne1	0.0106465	1	0.0214909	1	0.0243062	1	1	0.0188145
Ccne2	-0.016462	1	0.0169311	1	-0.015774	1	1	-0.00510164
Ccnf	0.0079422	1	0.0153411	1	0.0210259	1	1	0.0147697
Ccng1	0.0543661	1	0.0424184	1	0.04782	1	1	0.0482015
Ccng2	-0.017038	1	-0.0252956	1	-0.0090657	1	1	-0.0171331
Ccnh	-0.0858367	0.952368	-0.140463	1	-0.0880737	1	0.999981	-0.104791
Ccni	0.0314797	1	-0.0158002	1	-0.0240831	1	1	-0.00280117
Ccnk	-0.0156726	1	-0.0268386	1	-0.0219649	1	1	-0.021492
Ccnl1	-0.0970607	1	-0.170686	1	-0.0772217	1	1	-0.11499
Ccnl2	-0.0027959	1	0.06498	1	-0.00952377	1	1	0.0175534
Ccnt1	-0.0157549	1	-0.0301421	1	-0.0225606	1	1	-0.0228192
Ccnt2	-0.00843015	1	-0.0317474	1	-0.00129289	1	1	-0.0138235
Ccny	-0.0204927	1	-0.000671276	1	0.0316187	1	1	0.0034849
Ccnyl1	0.022783	1	0.0165103	1	-0.00393687	1	1	0.0117855
Ccp110	-0.00428523	1	-0.00376591	1	-0.019481	1	1	-0.00917737
Ccs	0.039033	1	-0.0481836	1	0.11607	1	1	0.0356397
Ccsap	-0.00340402	1	0.0224406	1	0.00776459	1	1	0.00893371
Ccser2	0.0312178	1	-0.00321637	1	-0.00481166	1	1	0.00772991
Cct2	-0.0280984	1	0.0373692	1	-0.0853625	1	1	-0.0253639
Cct3	-0.105287	0.0121426	-0.0313119	1	-0.168915	0.000117956	0.000150379	-0.101838
Cct4	-0.200682	1.5046e-17	-0.220986	1.61489e-07	-0.175936	5.02717e-06	2.78948e-26	-0.199201
Cct5	0.0051937	1	0.0125833	1	-0.0703375	1	1	-0.0175202
Cct7	-0.0928884	0.118895	-0.0779666	1	-0.103771	0.963993	0.631794	-0.0915418
Cct8	-0.0589178	1	-0.0784073	1	-0.111561	1	1	-0.0829622
Ccz1	0.0490171	1	-0.0103089	1	0.0174421	1	1	0.0187168
Cd109	0.000185943	1	0.0139115	1	-0.0343593	1	1	-0.00675394
Cd14	-0.0265269	1	-0.0210891	1	-0.016843	1	1	-0.0214863
Cd151	-0.0266545	1	0.0393214	1	0.00560814	1	1	0.00609168
Cd164	-0.00257026	1	0.0214573	1	-0.0114717	1	1	0.00247179
Cd248	0.0226595	1	-0.00300471	1	0.022645	1	1	0.0140999
Cd24a	-0.0254083	1	0.148348	1	0.00347293	1	1	0.0421377
Cd274	0.0159779	1	-0.0367849	1	0.0469388	1	1	0.0087106
Cd2ap	0.0647122	1	0.0548559	1	0.0029223	1	1	0.0408301
Cd2bp2	-0.014115	1	-0.0130293	1	-0.0056797	1	1	-0.0109413
Cd320	0.082716	0.235304	0.0968768	1	0.0805628	1	0.822059	0.0867185
Cd3eap	0.000708992	1	-0.078063	1	-0.0141216	1	1	-0.0304918
Cd44	-0.11525	0.635907	-0.174309	1	-0.157932	0.896777	0.980504	-0.149164
Cd47	0.00952375	1	-0.0782612	1	0.0277186	1	1	-0.013673
Cd63	0.107374	0.000132062	0.100433	0.378831	0.0917138	1	0.00299859	0.0998401
Cd74	-0.0116771	1	-0.00692567	1	0.00316447	1	1	-0.00514611
Cd81	0.176332	2.9076e-10	0.323944	1.3343e-18	0.169538	0.20299	1.70064e-25	0.223271
Cd9	0.0666488	1	0.259672	5.39858e-07	0.174376	0.0231168	2.30632e-06	0.166899
Cd99l2	0.038046	1	-0.0478817	1	0.0522821	1	1	0.0141488
Cda	-0.113585	8.13539e-07	-0.15042	1	-0.0749358	1	9.2197e-05	-0.11298
Cdadc1	-0.00971639	1	-0.0141886	1	0.00490164	1	1	-0.00633445
Cdc123	-0.0549401	1	-0.130217	1	-0.06811	1	1	-0.0844225
Cdc14a	0.015028	1	0.0471324	1	0.0708673	1	1	0.0443425
Cdc16	-0.0413468	1	-0.0528092	1	-0.054472	1	1	-0.0495427
Cdc20	-0.0224474	1	0.18823	1	-0.125826	1	1	0.0133188
Cdc23	-0.0274241	1	-0.0389693	1	-0.0241827	1	1	-0.030192
Cdc25a	0.011296	1	0.00337873	1	0.00333375	1	1	0.00600283
Cdc25b	-0.0120859	1	-0.0333524	1	-0.036416	1	1	-0.0272847
Cdc25c	-0.0118979	1	0.0143108	1	-0.0194039	1	1	-0.00566366
Cdc26	0.0107552	1	0.0506019	1	-0.0156583	1	1	0.0152329
Cdc27	-0.0290862	1	-0.091031	1	-0.0356405	1	1	-0.0519192
Cdc34	0.0635631	1	0.0628783	1	0.0626027	1	1	0.0630147
Cdc37	-0.055731	1	-0.0390955	1	-0.0772547	1	1	-0.0573604
Cdc37l1	0.0244175	1	0.0179869	1	0.0541034	1	1	0.0321693
Cdc40	0.00711805	1	0.0380261	1	-0.0292251	1	1	0.00530635
Cdc42	0.0595852	1	0.102342	1	0.0812357	1	1	0.0810543
Cdc42bpa	0.0471409	1	-0.0660324	1	0.0303325	1	1	0.00381365
Cdc42bpb	-0.0153678	1	-0.0454154	1	-0.0392122	1	1	-0.0333318
Cdc42ep1	-0.0340216	1	-0.0252605	1	-0.042963	1	1	-0.0340817
Cdc42ep2	0.0288096	1	-0.0110209	1	0.0126215	1	1	0.0101368
Cdc42ep3	-0.0315781	1	-0.0416496	1	-0.0491051	1	1	-0.0407776
Cdc42ep4	-0.0121536	1	-0.016672	1	0.016338	1	1	-0.00416252
Cdc42se1	0.0214238	1	-0.0206618	1	-0.0422026	1	1	-0.0138135
Cdc42se2	0.0169343	1	0.00941726	1	-0.0183499	1	1	0.00266722
Cdc45	-0.00706458	1	-0.0142638	1	-0.0206191	1	1	-0.0139825
Cdc5l	-0.0292808	1	0.0105381	1	-0.0615572	1	1	-0.0267666
Cdc6	-0.0228147	1	0.00376088	1	-0.0440919	1	1	-0.0210486
Cdc7	-0.00962035	1	0.00116657	1	0.0123899	1	1	0.00131205
Cdc73	0.0225706	1	0.0618336	1	-0.0204204	1	1	0.0213279
Cdca2	-0.0025689	1	-0.0122313	1	-0.0766282	1	1	-0.0304761
Cdca3	0.00780316	1	-0.0362653	1	-0.0795969	1	1	-0.0360197
Cdca4	-0.0210336	1	-0.0137104	1	-0.0655032	1	1	-0.0334157
Cdca5	0.00556111	1	-0.0198473	1	-0.00349823	1	1	-0.00592813
Cdca7	-0.0782613	1	-0.105371	1	-0.0912275	1	1	-0.0916199
Cdca7l	-0.0152769	1	0.0117059	1	-0.020044	1	1	-0.00787167
Cdca8	0.000257681	1	0.140323	1	-0.125194	1	1	0.00512872
Cdh15	0.255125	0.00215582	0.0589481	1	0.154909	1	0.0560229	0.156327
Cdip1	0.00339507	1	-0.0224823	1	-0.00200398	1	1	-0.00703039
Cdipt	0.0387097	1	0.0353925	1	0.00938714	1	1	0.0278298
Cdk1	0.00810457	1	-0.0551827	1	-0.154779	1	1	-0.0672858
Cdk10	0.0121819	1	-0.0165109	1	0.00745223	1	1	0.00104109
Cdk11b	-6.10455e-05	1	0.0989112	1	-0.041886	1	1	0.0189881
Cdk12	-0.0768674	1	-0.0870461	1	-0.0594535	1	1	-0.0744557
Cdk13	-0.074151	1	-0.147059	1	-0.103084	1	1	-0.108098
Cdk14	0.0187097	1	0.0145428	1	0.0147204	1	1	0.015991
Cdk16	0.000778632	1	-0.0524974	1	-0.00223031	1	1	-0.017983
Cdk17	-0.016749	1	-0.0186568	1	-0.00788664	1	1	-0.0144308
Cdk18	-0.0418993	1	-0.0496064	1	-0.0863183	1	1	-0.0592747
Cdk19	0.00972477	1	-0.0114581	1	0.00202119	1	1	9.59446e-05
Cdk2	0.000330197	1	0.0107194	1	-0.0209623	1	1	-0.00330423
Cdk2ap1	0.0463562	1	0.081593	1	-0.00140177	1	1	0.0421825
Cdk2ap2	0.189693	4.43891e-14	0.243967	1.5416e-07	0.231309	9.83983e-09	1.46101e-25	0.221656
Cdk4	-0.0384415	1	-0.078218	1	-0.153729	0.07717	0.528075	-0.0901297
Cdk5	-0.00217172	1	-0.0369421	1	0.0118276	1	1	-0.0090954
Cdk5rap2	0.0167412	1	0.0589088	1	-0.00526885	1	1	0.0234604
Cdk5rap3	-0.010577	1	-0.059729	1	-0.0198841	1	1	-0.0300634
Cdk6	-0.0011045	1	0.0403668	1	-0.0165562	1	1	0.00756869
Cdk7	-0.0312514	1	0.0132092	1	-0.0572496	1	1	-0.0250973
Cdk8	-1.78461e-06	1	0.00559885	1	-0.0310879	1	1	-0.00849693
Cdk9	-0.0688418	1	-0.097468	1	-0.0954644	1	1	-0.0872581
Cdkal1	-0.027853	1	-0.0145146	1	-0.0203511	1	1	-0.0209062
Cdkl2	0.0159748	1	-0.0136802	1	-0.0051274	1	1	-0.000944281
Cdkl5	0.00750575	1	-0.0130973	1	-0.0123681	1	1	-0.00598654
Cdkn1a	0.0219405	1	-0.0449906	1	-0.00479335	1	1	-0.00928114
Cdkn1b	-0.017135	1	-0.0490325	1	-0.0151954	1	1	-0.027121
Cdkn2a	0.206913	1.20267e-14	0.178902	0.00210508	0.270981	6.60276e-11	3.28205e-24	0.218932
Cdkn2aip	-0.0490766	1	-0.0518872	1	-0.0250587	1	1	-0.0420075
Cdkn2aipnl	-0.000611909	1	0.0254237	1	-0.0640408	1	1	-0.0130763
Cdkn2b	0.0148515	1	-0.0339473	1	0.0100484	1	1	-0.00301583
Cdkn2c	0.157864	1.26186e-12	0.314867	2.16066e-21	0.26234	7.68504e-14	1.18122e-42	0.245024
Cdkn2d	-0.0181378	1	-0.0283444	1	-0.0867045	1	1	-0.0443955
Cdkn3	0.00914025	1	0.000512208	1	-0.0642302	1	1	-0.0181926
Cdpf1	-0.0096217	1	-0.000961804	1	-0.0187888	1	1	-0.00979078
Cdr2	0.0306433	1	0.0904258	0.0439564	0.0624992	1	0.39587	0.0611895
Cdr2l	0.0163221	1	0.0221317	1	0.0369122	1	1	0.025122
Cds2	-0.0222789	1	-0.0420752	1	0.00531168	1	1	-0.0196808
Cdt1	-0.0260504	1	-0.00954748	1	-0.00744914	1	1	-0.014349
Cdv3	-0.087723	1	-0.0142755	1	-0.140451	1	1	-0.0808164
Cdyl	-0.0626375	1	-0.0688658	1	-0.0915756	1	1	-0.0743596
Cebpb	-0.267261	0.000303757	-0.566948	2.89897e-12	-0.283258	0.00179022	1.39064e-15	-0.372489
Cebpd	0.0450683	1	0.119998	0.0088486	0.0411014	1	0.14956	0.0687225
Cebpg	-0.0415098	1	-0.0579559	1	-0.113369	1	1	-0.0709448
Cebpz	-0.0809272	1	-0.0318304	1	-0.0566917	1	1	-0.0564831
Cebpzos	0.0301363	1	0.00792661	1	0.0459244	1	1	0.0279958
Celf1	-0.0602717	1	-0.122467	1	-0.0694019	1	1	-0.0840468
Celf2	-0.0241848	1	-0.0397143	1	-0.0620765	1	1	-0.0419918
Celf4	-0.0188109	1	-0.0686636	1	-0.0290162	1	1	-0.0388302
Cenpa	0.0455522	1	0.169792	1	-0.227207	1	1	-0.00395426
Cenpb	-0.0764712	1	-0.136873	1	-0.0702219	1	1	-0.0945219
Cenpc1	0.0260464	1	-0.00965542	1	0.00166772	1	1	0.00601956
Cenpe	0.0296397	1	0.0463345	1	-0.0748204	1	1	0.000384594
Cenpf	-0.0543584	1	0.000490686	1	-0.129106	1	1	-0.0609913
Cenph	-0.056462	1	-0.0594753	1	-0.127645	0.104957	0.608218	-0.0811941
Cenpi	-0.00566847	1	-0.0337893	1	-0.0412822	1	1	-0.0269133
Cenpk	-0.0400733	1	-0.0452178	1	-0.0535488	1	1	-0.04628
Cenpl	0.0206787	1	0.0130186	1	-0.0123178	1	1	0.00712652
Cenpm	0.00403952	1	-0.0162254	1	-0.0103341	1	1	-0.00750664
Cenpn	0.00254531	1	0.0353207	1	0.000886651	1	1	0.0129176
Cenpp	-0.0274812	1	-0.0609212	1	-0.043216	1	1	-0.0438728
Cenpq	0.00469185	1	-0.0529009	1	-0.0631578	1	1	-0.0371223
Cenps	0.00647993	1	0.00516381	1	-0.0250381	1	1	-0.00446478
Cenpt	-0.00201592	1	-0.00341824	1	-0.0188855	1	1	-0.00810656
Cenpu	-0.028169	1	-0.0324895	1	-0.0209088	1	1	-0.0271891
Cenpv	-0.021951	1	-0.133006	1	-0.178828	0.0331545	0.338473	-0.111262
Cenpw	0.0183995	1	0.00360866	1	-0.0510862	1	1	-0.0096927
Cenpx	0.0336823	1	0.07446	1	0.00540305	1	1	0.0378485
Cep104	0.0248492	1	0.0330828	1	-0.0189608	1	1	0.0129904
Cep112	-0.00209639	1	-0.0142951	1	-0.0142661	1	1	-0.0102192
Cep120	-0.00369941	1	-0.00196037	1	-0.0177508	1	1	-0.00780351
Cep131	-0.00138345	1	-0.0342986	1	-0.0219804	1	1	-0.0192208
Cep135	0.00244206	1	5.77826e-05	1	-0.0165074	1	1	-0.0046692
Cep162	-0.0278389	1	-0.00652978	1	-0.0101658	1	1	-0.0148448
Cep164	-0.0187969	1	-0.0779601	1	-0.0715683	1	1	-0.0561084
Cep170	0.002052	1	0.0250085	1	-0.000465206	1	1	0.00886509
Cep170b	-0.00788713	1	-0.0311102	1	-0.0300167	1	1	-0.0230047
Cep19	0.00176627	1	0.013154	1	0.0163853	1	1	0.0104352
Cep192	-0.0249456	1	-0.0527069	1	-0.0305838	1	1	-0.0360788
Cep250	-0.0211471	1	-0.0365009	1	-0.03728	1	1	-0.0316427
Cep290	-0.0130802	1	-0.0364305	1	-0.0341423	1	1	-0.0278843
Cep295	-0.0225966	1	-0.0302217	1	-0.0753132	1	1	-0.0427105
Cep350	-0.0104013	1	-0.0634374	1	-0.0374783	1	1	-0.0371057
Cep41	-0.00516431	1	0.0198555	1	-0.0275374	1	1	-0.00428206
Cep44	-0.027899	1	-0.0277374	1	-0.0155975	1	1	-0.0237446
Cep55	-0.00839778	1	0.0403333	1	-0.00610581	1	1	0.00860991
Cep57	-0.0314191	1	-0.0654715	1	-0.111903	1	1	-0.0695978
Cep57l1	-0.0180467	1	-0.0136491	1	-0.00857001	1	1	-0.0134219
Cep63	-0.0261841	1	0.000682277	1	-0.0332991	1	1	-0.0196003
Cep68	-0.0127527	1	-0.0186795	1	-0.00974166	1	1	-0.0137246
Cep70	-0.00485528	1	-0.0172213	1	-0.000304276	1	1	-0.0074603
Cep78	-0.010087	1	-0.00646306	1	-0.0171551	1	1	-0.011235
Cep83	-0.0164029	1	-0.0405467	1	-0.0756328	1	1	-0.0441942
Cep85	-0.00996994	1	0.0182805	1	-0.00941148	1	1	-0.000366961
Cep89	-0.0119122	1	0.0053919	1	-0.0312173	1	1	-0.0125792
Cept1	0.00970844	1	-0.0286478	1	-0.0144065	1	1	-0.0111153
Cerk	-0.00440779	1	-0.0200661	1	0.00257585	1	1	-0.00729935
Cers2	0.0316364	1	0.0343895	1	-0.0105292	1	1	0.0184989
Cers5	0.0154274	1	-0.0275709	1	-0.0121919	1	1	-0.00811179
Cers6	0.00328111	1	0.0233292	1	0.00370317	1	1	0.0101045
Cetn2	0.0798968	1	-0.100977	1	0.0296471	1	1	0.00285547
Cetn3	-0.102847	1	-0.168133	0.150898	-0.148528	0.0302844	0.0955327	-0.139836
Cetn4	-0.0481362	1	-0.0660724	1	-0.0220879	1	1	-0.0454322
Cfap20	0.0497763	1	0.0140514	1	0.07373	1	1	0.0458526
Cfap36	-0.0256175	1	0.0439782	1	0.0468318	1	1	0.0217309
Cfap43	0.00110613	1	-0.0209567	1	-0.00649937	1	1	-0.00878331
Cfap97	-0.00628715	1	-0.0313714	1	-0.000807282	1	1	-0.0128219
Cfdp1	0.088761	0.0377467	0.0871426	1	0.0953154	1	0.364096	0.0904063
Cfl1	0.074935	0.486863	0.0948617	1	0.176036	3.67109e-07	2.45296e-05	0.115278
Cfl2	-0.136395	0.00018434	-0.0824659	1	-0.157221	0.037062	0.000571335	-0.125361
Cflar	0.0349109	1	0.0835501	0.631887	0.0175019	1	0.988528	0.045321
Cggbp1	0.033504	1	0.011622	1	-0.041504	1	1	0.00120734
Cgref1	0.0150493	1	0.028051	1	0.00572176	1	1	0.016274
Cgrrf1	0.0125426	1	-0.0296115	1	0.00684252	1	1	-0.00340878
Chac2	-0.0225677	1	-0.00784303	1	-0.0158363	1	1	-0.0154157
Chaf1a	-0.0379145	1	-0.00946457	1	-0.0784688	1	1	-0.0419493
Chaf1b	-0.0397725	1	0.0249352	1	-0.0106577	1	1	-0.00849836
Champ1	-0.0186803	1	-0.043024	1	-0.0426905	1	1	-0.0347983
Chchd1	-0.115222	0.0430006	-0.0596007	1	-0.115902	1	0.391172	-0.0969083
Chchd10	-0.0296045	1	0.0139156	1	-0.180463	0.000108866	0.00563511	-0.065384
Chchd2	0.0159953	1	-0.053314	1	0.0223425	1	1	-0.00499205
Chchd3	-0.00275724	1	0.0314292	1	-0.00953347	1	1	0.0063795
Chchd4	-0.0928022	1	-0.015165	1	-0.121849	1	1	-0.0766055
Chchd5	-0.0554932	1	-0.0179284	1	-0.0336409	1	1	-0.0356875
Chchd6	-0.0415876	1	-0.0996876	1	-0.0851885	1	1	-0.0754879
Chchd7	0.0737613	1	0.125086	0.307662	0.0494303	1	0.884062	0.0827591
Chd1	0.118587	0.0445867	0.0898887	1	0.0206991	1	0.398933	0.0763917
Chd1l	0.0224843	1	0.0200791	1	-0.0256552	1	1	0.00563603
Chd2	-0.0593968	1	-0.0414135	1	-0.0212148	1	1	-0.0406751
Chd3	0.0654441	1	-0.0616839	1	0.0344489	1	1	0.0127364
Chd4	-0.00729654	1	-0.103384	1	-0.0968626	1	1	-0.069181
Chd6	-0.0633351	1	-0.0713332	1	0.0303085	1	1	-0.0347866
Chd7	-0.073216	1	-0.0146856	1	-0.0791725	1	1	-0.0556914
Chd8	-0.00364538	1	-0.0356733	1	-0.0393695	1	1	-0.0262294
Chd9	0.0527904	1	-0.0181357	1	0.0619585	1	1	0.0322044
Chek1	-0.0243083	1	-0.0327752	1	-0.074389	1	1	-0.0438242
Chek2	-0.00827664	1	-0.0060616	1	-0.0267995	1	1	-0.0137126
Cherp	0.0191749	1	0.0430172	1	-0.047432	1	1	0.00492004
Chfr	0.0114257	1	0.00340188	1	-0.0113966	1	1	0.00114367
Chic1	0.0196658	1	0.0273104	1	0.0349522	1	1	0.0273095
Chic2	0.0747317	1	0.100777	1	0.070363	1	1	0.0819572
Chid1	0.00139977	1	0.0160105	1	0.029986	1	1	0.0157988
Chka	-0.0167369	1	0.0574369	1	0.00470101	1	1	0.0151337
Chm	-3.6177e-05	1	-0.0338304	1	0.011173	1	1	-0.00756454
Chml	0.0130779	1	0.00890786	1	0.0116712	1	1	0.011219
Chmp1a	0.020861	1	0.00263469	1	0.0270323	1	1	0.0168427
Chmp1b	-0.0178952	1	-0.049621	1	-0.0181493	1	1	-0.0285552
Chmp2a	0.0512841	1	0.00365232	1	0.0917867	1	1	0.0489077
Chmp2b	0.0396724	1	0.0145821	1	0.0403909	1	1	0.0315485
Chmp3	0.0484867	1	0.048142	1	0.0205112	1	1	0.0390466
Chmp4b	-0.0932145	1	-0.148711	1	-0.109066	1	1	-0.116997
Chmp5	0.0791266	0.26987	0.162833	0.00450877	0.119003	1	0.0367881	0.120321
Chmp6	-0.0253258	1	-0.0203699	1	-0.0921002	1	1	-0.045932
Chmp7	0.0117858	1	-0.03528	1	-0.00136336	1	1	-0.00828585
Chordc1	-0.0217731	1	-0.0983065	1	-0.0892133	1	1	-0.0697643
Chp1	-0.00852145	1	-0.0328021	1	0.0115741	1	1	-0.00991648
Chpf	0.0633417	1	0.020329	1	0.0603593	1	1	0.04801
Chpf2	0.0169103	1	-0.000329731	1	0.0561606	1	1	0.0242471
Chpt1	0.0620529	0.621168	0.0677035	1	0.0543139	1	0.987356	0.0613568
Chrac1	-0.00918082	1	0.0372421	1	-0.071845	1	1	-0.0145945
Chrnb1	0.00990647	1	0.00838307	1	-0.0287768	1	1	-0.00349574
Chst11	0.063712	0.0971338	0.038062	1	0.0385884	1	0.587659	0.0467874
Chst12	0.0163516	1	0.0193563	1	0.00392832	1	1	0.0132121
Chst14	-0.0355659	1	-0.0495833	1	-0.00437543	1	1	-0.0298415
Chst15	-0.0163025	1	-0.0588833	1	-0.0131583	1	1	-0.029448
Chsy1	-0.00995082	1	-0.0114302	1	-0.0105244	1	1	-0.0106351
Chtf18	0.013347	1	0.00189436	1	-0.00558843	1	1	0.00321765
Chtf8	-0.00121111	1	0.0103011	1	-0.0190148	1	1	-0.00330828
Chtop	0.0105151	1	-0.00843279	1	-0.116952	1	1	-0.0382898
Chuk	0.0330668	1	0.0376797	1	0.032718	1	1	0.0344882
Churc1	-0.00759505	1	0.0625424	1	0.0105588	1	1	0.0218354
Ciao1	-0.0399731	1	-0.0346453	1	-0.0131994	1	1	-0.0292726
Ciapin1	0.0886226	1	0.207216	0.00151653	0.104866	1	0.0433122	0.133568
Cib1	0.0508612	1	0.0522592	1	0.0531672	1	1	0.0520959
Cib2	0.00559179	1	0.0150977	1	0.00764862	1	1	0.00944605
Cic	-0.00736635	1	0.0182246	1	0.0172728	1	1	0.00937702
Cinp	-0.00461979	1	0.0163725	1	-0.0597456	1	1	-0.0159976
Cipc	-0.0112289	1	-0.0212241	1	-0.00136147	1	1	-0.0112715
Cir1	-0.0650313	1	-0.132951	1	-0.0577945	1	1	-0.085259
Cirbp	-0.0267976	1	0.0146179	1	-0.0246895	1	1	-0.0122898
Cisd1	0.100865	0.16367	0.0859591	1	-0.00561173	1	0.727969	0.0604041
Cisd2	0.0991689	0.00229644	0.165238	0.00323172	0.0147163	1	0.000612734	0.0930411
Cisd3	-0.112373	0.00314707	-0.0743169	1	-0.016396	1	0.0735076	-0.0676954
Cit	0.0284483	1	0.0268478	1	0.0422846	1	1	0.0325269
Cited2	-0.166671	1	-0.0601717	1	-0.104634	1	1	-0.110492
Ciz1	-0.00615563	1	-0.0590628	1	-0.0177945	1	1	-0.027671
Ckap2	0.00089741	1	-0.0129723	1	-0.0695205	1	1	-0.0271985
Ckap2l	-0.0374633	1	-0.0786359	1	-0.0990792	1	1	-0.0717261
Ckap4	0.0787128	1	0.0448581	1	0.0133679	1	1	0.0456463
Ckap5	-0.0975289	1	-0.171535	1	-0.0796671	1	1	-0.116244
Cklf	0.0476407	1	0.0152416	1	0.0412769	1	1	0.0347197
Cks1b	0.0502816	1	0.148099	1	-0.213817	0.053345	0.438831	-0.00514553
Cks2	-0.168315	1	-0.117739	1	-0.277951	0.00849064	0.145525	-0.188001
Clasp1	-0.0150688	1	-0.0369837	1	-0.0211376	1	1	-0.0243967
Clasp2	-0.00564086	1	-0.0453793	1	0.00261546	1	1	-0.0161349
Clasrp	-0.0117427	1	-0.0192771	1	-0.0192536	1	1	-0.0167578
Clcc1	0.0217396	1	-0.0139447	1	-0.0163239	1	1	-0.00284298
Clcf1	-0.0258504	1	0.0740038	1	0.0277011	1	1	0.0252848
Clcn3	-0.0546321	1	-0.0608223	1	-0.0929883	1	1	-0.0694809
Clcn4	0.0135874	1	0.0148735	1	0.0355137	1	1	0.0213248
Clcn5	0.00284776	1	-0.0522807	1	-0.0278465	1	1	-0.0257598
Cldn12	-0.0107211	1	0.0263153	1	-0.0172214	1	1	-0.0005424
Cldnd1	0.0607358	1	0.0347231	1	0.0269635	1	1	0.0408075
Clec16a	-0.0027648	1	-0.00069403	1	0.0143053	1	1	0.00361549
Clic1	-0.0675837	1	-0.0971028	1	-0.0862267	1	1	-0.0836378
Clic4	-0.00624477	1	0.130983	1	0.0216352	1	1	0.0487911
Clint1	0.00984392	1	-0.000896048	1	-0.068246	1	1	-0.019766
Clip1	0.011578	1	0.0224844	1	0.0391786	1	1	0.0244137
Clip2	-0.0140962	1	-0.030435	1	-0.0115996	1	1	-0.0187102
Clip4	-0.0319763	1	-0.147731	1	-0.00749809	1	1	-0.0624018
Clk1	-0.0739179	1	-0.0581534	1	-0.0278108	1	1	-0.053294
Clk2	0.0224213	1	0.0128356	1	-0.0355288	1	1	-9.06579e-05
Clk3	-0.0189599	1	-0.0540104	1	-0.0303933	1	1	-0.0344545
Clk4	-0.0110792	1	-0.0676415	1	-0.00822606	1	1	-0.0289823
Cln3	0.00402696	1	-0.0112626	1	0.0363346	1	1	0.00969967
Cln5	0.00669564	1	-0.00318996	1	-0.0261147	1	1	-0.00753634
Cln6	0.00204532	1	0.0029733	1	0.00427851	1	1	0.00309905
Clns1a	-0.0193572	1	-0.0353716	1	-0.0745823	1	1	-0.0431037
Clock	0.00691192	1	-0.035225	1	-0.00549798	1	1	-0.0112703
Clp1	-7.86566e-05	1	-0.0176361	1	0.00512735	1	1	-0.0041958
Clpb	-0.0102186	1	-0.0103532	1	0.0127685	1	1	-0.00260111
Clpp	0.00732671	1	0.0149425	1	0.0500738	1	1	0.0241143
Clptm1	0.0171585	1	0.0412548	1	-0.00255544	1	1	0.0186193
Clptm1l	-0.0646127	1	0.00820389	1	0.0138458	1	1	-0.0141877
Clpx	0.000298792	1	-0.0296821	1	-0.0318771	1	1	-0.0204201
Clspn	-0.0196536	1	0.045958	1	-0.067617	1	1	-0.0137708
Clstn1	0.0165843	1	0.0704702	1	0.0544876	1	1	0.0471807
Clta	0.0405746	1	0.160099	2.99017e-05	0.00654572	1	0.00196396	0.0690732
Cltb	-0.00980654	1	0.0209723	1	-0.0240105	1	1	-0.00428159
Cltc	0.0382519	1	0.00535247	1	-0.0225188	1	1	0.00702854
Clu	-0.078596	1	0.0917796	1	-0.0261923	1	1	-0.00433624
Cluap1	-0.0154385	1	-0.01095	1	-0.0278816	1	1	-0.01809
Cluh	-0.0462652	1	-0.0088304	1	-0.0708298	1	1	-0.0419751
Clybl	-0.031179	1	-0.0392956	1	-0.0512937	1	1	-0.0405894
Cmas	0.0386761	1	0.0156339	1	-0.038045	1	1	0.00542166
Cmc1	0.0236957	1	-0.0171829	1	-0.0259585	1	1	-0.00648192
Cmc2	0.0572908	1	0.0131236	1	0.0575787	1	1	0.0426644
Cmc4	0.00728256	1	-0.0211023	1	0.00301735	1	1	-0.0036008
Cmip	0.0835628	0.291749	0.0440113	1	0.100017	1	0.872505	0.0758638
Cmpk1	0.0893515	0.170719	0.210965	1.55093e-06	0.089843	1	3.46378e-05	0.130053
Cmss1	-0.0454148	1	-0.0583235	1	-0.0661447	1	1	-0.0566277
Cmtm3	0.0771911	0.9864	0.0716025	1	0.0618512	1	1	0.0702149
Cmtm4	0.0172845	1	0.0251361	1	-0.00887107	1	1	0.0111831
Cmtm6	-0.00145741	1	0.0102541	1	0.00708211	1	1	0.00529293
Cmtm7	-0.0034582	1	0.00365816	1	-0.0718657	1	1	-0.0238886
Cnbp	-0.0875732	1	0.0430825	1	-0.0912727	1	1	-0.0452545
Cndp2	0.0174255	1	-0.0298694	1	-0.0194775	1	1	-0.0106404
Cnep1r1	0.0555784	1	0.0673058	1	0.0422167	1	1	0.0550336
Cnih1	-0.00616438	1	0.00557337	1	-0.0537765	1	1	-0.0181225
Cnih4	-0.0167693	1	-0.0161375	1	-0.0909541	1	1	-0.041287
Cnn2	0.0744384	1	0.0264311	1	-0.0689631	1	1	0.0106355
Cnn3	0.0954743	0.134362	0.134984	1	0.0238274	1	0.674723	0.084762
Cnnm3	-0.0192756	1	-0.0194651	1	-0.0411869	1	1	-0.0266425
Cnnm4	-0.0123293	1	-0.0996069	1	-0.0449018	1	1	-0.0522793
Cnot1	0.0336534	1	0.0173105	1	0.0108555	1	1	0.0206064
Cnot10	-0.00798121	1	0.0149414	1	0.00366999	1	1	0.00354339
Cnot11	0.0062817	1	0.00927667	1	-0.0250343	1	1	-0.00315864
Cnot2	-0.0162861	1	-0.0450004	1	-0.061653	1	1	-0.0409798
Cnot3	-0.00527516	1	0.0629451	1	-0.0103182	1	1	0.0157839
Cnot4	0.00268747	1	0.015026	1	0.00154655	1	1	0.00642001
Cnot6	0.0411294	1	0.0253347	1	0.00939485	1	1	0.0252863
Cnot6l	0.00757863	1	-0.0265323	1	0.0176277	1	1	-0.000441984
Cnot7	-0.0589236	1	-0.11213	1	-0.0706754	1	1	-0.0805762
Cnot8	-0.0238108	1	0.0098845	1	0.011317	1	1	-0.000869772
Cnot9	-0.0104724	1	0.00867716	1	-0.0373276	1	1	-0.013041
Cnp	-0.0396275	1	-0.0476599	1	-0.0267946	1	1	-0.0380273
Cnppd1	-0.0333339	1	-0.0532451	1	-0.0272897	1	1	-0.0379562
Cnpy2	0.0149251	1	-0.0986427	1	-0.0404361	1	1	-0.0413846
Cnpy3	0.0119588	1	0.0149854	1	0.019576	1	1	0.0155067
Cnpy4	0.0194355	1	0.0133976	1	0.0458184	1	1	0.0262172
Cntln	0.0129154	1	-0.00233003	1	-0.0190486	1	1	-0.00282108
Cntrl	-0.0138927	1	-0.0849123	1	-0.0579228	1	1	-0.0522426
Coa3	-0.188493	1.60269e-06	-0.308234	4.56e-10	-0.146402	1	4.70064e-13	-0.214376
Coa4	-0.0156298	1	-0.0208894	1	-0.0103383	1	1	-0.0156192
Coa5	-0.0143343	1	-0.0266031	1	0.00268123	1	1	-0.0127521
Coa6	0.0282319	1	-0.0224532	1	0.0220567	1	1	0.00927845
Coa7	-0.00982093	1	0.0256749	1	-0.0114298	1	1	0.00147471
Coasy	-0.0483413	1	-0.0694067	1	-0.0168333	1	1	-0.0448604
Cobll1	0.0178718	1	0.0444572	1	0.0504143	1	1	0.0375811
Cog1	-0.000164659	1	-0.00739782	1	-0.0128818	1	1	-0.00681476
Cog2	-0.0113805	1	-0.0117515	1	0.0145705	1	1	-0.00285383
Cog4	0.00174548	1	0.0136324	1	0.0386184	1	1	0.0179988
Cog5	0.00693559	1	-0.00380066	1	0.000541445	1	1	0.00122546
Cog6	0.0213661	1	0.00478681	1	-0.000984164	1	1	0.00838957
Cog7	-0.0079992	1	-0.0211196	1	-0.00916181	1	1	-0.0127602
Cog8	0.0239388	1	0.056857	1	0.069612	1	1	0.0501359
Coil	-0.0061765	1	0.00830665	1	-0.00100671	1	1	0.000374483
Col12a1	-0.0399888	1	-0.0622977	1	-0.0273375	1	1	-0.043208
Col16a1	0.0393917	1	0.0339384	1	0.034742	1	1	0.036024
Col18a1	0.0380356	1	-0.117483	1	-0.126453	1	1	-0.0686333
Col1a1	0.265486	1.21277e-33	0.197977	4.72309e-08	0.237002	3.80704e-09	1.39353e-45	0.233488
Col1a2	-0.201244	1	-0.164003	1	-0.404345	0.0720577	0.510853	-0.256531
Col23a1	0.0200257	1	0.00268945	1	-0.00896991	1	1	0.00458175
Col3a1	0.525258	2.03039e-47	0.956852	5.98151e-69	0.548559	1.22062e-31	8.40714e-142	0.676889
Col4a1	-0.034472	1	-0.131107	1	0.0114485	1	1	-0.051377
Col4a2	0.0121485	1	-0.0903621	1	0.0296052	1	1	-0.0162028
Col4a3bp	-0.0490366	1	0.00465892	1	-0.082764	1	1	-0.0423805
Col4a5	0.100745	3.20747e-05	0.0542809	1	0.107996	0.804733	0.00173895	0.0876737
Col5a1	-0.0624688	1	-0.134785	1	-0.0442493	1	1	-0.0805011
Col5a3	-0.0403451	1	-0.0892141	1	-0.0103449	1	1	-0.0466347
Col6a1	0.29789	0.00647492	0.101685	1	0.166479	1	0.121338	0.188685
Col6a2	0.223933	0.0694245	0.112245	1	0.0861527	1	0.501615	0.140777
Col6a3	0.12751	1	-0.0153768	1	0.159148	1	1	0.090427
Col7a1	-0.0302995	1	-0.0825922	1	-0.027562	1	1	-0.0468179
Col8a1	0.0972383	0.474936	0.239079	0.000181102	0.114598	1	0.00465974	0.150305
Colgalt1	0.0723486	1	0.0799443	1	0.103498	1	1	0.0852637
Commd1	0.0668658	1	0.0133453	1	-0.0305353	1	1	0.0165586
Commd10	-0.0050615	1	-0.0349242	1	0.0218676	1	1	-0.00603938
Commd2	0.00785665	1	0.018486	1	-0.0303431	1	1	-0.00133347
Commd3	-0.0725588	1	-0.0966094	1	-0.0992145	1	1	-0.0894609
Commd4	-0.0204783	1	0.0144405	1	-0.0121891	1	1	-0.00607562
Commd6	0.0397933	1	0.0544142	1	0.0623235	1	1	0.052177
Commd7	0.0720755	1	0.034623	1	0.0219908	1	1	0.0428964
Commd8	0.000795562	1	-0.0208736	1	0.0207245	1	1	0.000215487
Commd9	-0.0161825	1	-0.0616034	1	-0.00026497	1	1	-0.026017
Comt	0.0315161	1	0.0209456	1	-0.0349341	1	1	0.00584256
Comtd1	-0.0315529	1	-0.0768362	1	-0.0426986	1	1	-0.0503626
Cop1	0.035777	1	0.0432188	1	0.00234513	1	1	0.0271137
Copa	0.0475491	1	-0.00267878	1	-0.000296591	1	1	0.0148579
Copb1	0.0227135	1	0.00490738	1	-0.0237312	1	1	0.00129658
Copb2	0.0122149	1	0.0657982	1	0.0345853	1	1	0.0375328
Cope	0.111618	0.000236452	0.0931846	1	0.247983	1.05977e-08	9.63466e-10	0.150928
Copg1	-0.017668	1	0.052835	1	0.0130968	1	1	0.016088
Copg2	-0.0133385	1	-0.0456827	1	-0.0326346	1	1	-0.0305519
Coprs	0.00856596	1	9.09233e-05	1	0.0274586	1	1	0.0120385
Cops2	-0.0869667	1	-0.138354	1	-0.111621	1	1	-0.112314
Cops3	-0.0121834	1	0.0147684	1	-0.000868273	1	1	0.000572235
Cops4	0.0119458	1	0.055665	1	0.0314417	1	1	0.0330175
Cops5	-0.0260378	1	-0.0123056	1	0.0208236	1	1	-0.00583991
Cops6	-0.0203398	1	-0.0987929	1	-0.0226337	1	1	-0.0472555
Cops7a	-0.0749387	1	-0.00630122	1	-0.0121232	1	1	-0.0311211
Cops7b	-0.00410944	1	0.00954499	1	0.000178791	1	1	0.00187145
Cops8	-0.010622	1	-0.00534219	1	-0.0880737	1	1	-0.0346793
Cops9	0.104939	0.00627717	0.121564	0.665942	0.104252	1	0.0897842	0.110252
Copz1	0.0138033	1	0.0210548	1	0.0232878	1	1	0.019382
Copz2	-0.0438786	1	-0.12249	1	-0.0227024	1	1	-0.0630236
Coq10a	-1.00586e-06	1	-0.0125918	1	-0.00166541	1	1	-0.00475275
Coq10b	0.0335138	1	0.0433948	1	-0.00634218	1	1	0.0235222
Coq2	-0.0444807	1	-0.0272839	1	-0.0890638	1	1	-0.0536094
Coq3	-0.0340398	1	0.0302409	1	-0.00749726	1	1	-0.00376537
Coq4	-0.0538057	1	-0.0465097	1	-0.0439675	1	1	-0.0480943
Coq5	-0.0579464	1	0.00695803	1	-0.00135709	1	1	-0.0174485
Coq6	-0.0247579	1	0.0100466	1	0.0389226	1	1	0.00807043
Coq7	0.0183649	1	0.0233122	1	-0.0237541	1	1	0.00597434
Coq9	0.0231838	1	0.0511314	1	0.0192637	1	1	0.031193
Coro1b	0.0213092	1	-0.0399277	1	0.0409935	1	1	0.00745835
Coro1c	0.00156475	1	0.0297053	1	0.0250548	1	1	0.018775
Cotl1	-0.0856935	1	-0.17844	0.37483	-0.053717	1	0.923109	-0.10595
Cox10	-0.00476656	1	-0.013918	1	-0.0357594	1	1	-0.018148
Cox11	0.0267705	1	0.03626	1	0.00664164	1	1	0.023224
Cox14	0.0444409	1	0.0594085	1	0.011995	1	1	0.0386148
Cox16	-0.0187304	1	-0.0355377	1	-0.021125	1	1	-0.025131
Cox17	-0.0445998	1	-0.0501394	1	-0.0306728	1	1	-0.041804
Cox18	-0.0287041	1	-0.0353672	1	-0.0377504	1	1	-0.0339406
Cox19	0.0356835	1	-0.0176409	1	0.0227968	1	1	0.0136131
Cox20	0.081817	1	0.0184202	1	0.056386	1	1	0.0522078
Cox4i1	0.0872586	0.000348272	0.0619568	1	0.182147	3.67851e-11	6.97723e-12	0.110454
Cox5a	0.0066496	1	0.0314126	1	-0.0536144	1	1	-0.00518405
Cox5b	-0.0435309	1	-0.00815517	1	-0.0226408	1	1	-0.0247756
Cox6a1	0.0285326	1	0.0599185	1	-0.00640241	1	1	0.0273496
Cox6b1	-0.029396	1	-0.0455538	1	-0.00635437	1	1	-0.0271014
Cox6c	0.0375465	1	0.0299947	1	-0.0368359	1	1	0.0102351
Cox7a2	0.0492892	1	0.122833	0.39459	0.0115252	1	0.932129	0.0612157
Cox7a2l	0.0722548	1	0.0458115	1	0.121703	1	1	0.0799231
Cox7b	-0.0817964	1	-0.376943	5.26445e-12	-0.0658202	1	1.91727e-09	-0.174853
Cox7c	-0.193695	4.29119e-17	-0.253855	2.21631e-13	-0.232734	4.4566e-16	2.25604e-41	-0.226761
Cox8a	0.104931	3.06843e-06	0.116474	0.0194696	0.15977	2.3679e-07	7.65805e-12	0.127058
Cp	-0.334586	2.38828e-10	-0.548758	2.57521e-10	-0.291725	4.00198e-05	3.7731e-21	-0.39169
Cpd	0.0202033	1	0.0630134	1	0.00391828	1	1	0.029045
Cpe	0.416027	1.50619e-48	0.531403	1.51973e-32	0.483481	4.49599e-36	3.63459e-111	0.476971
Cpeb2	0.0029532	1	0.000190463	1	-0.0122536	1	1	-0.00303665
Cpeb4	0.00599191	1	-0.00323293	1	0.0388142	1	1	0.0138577
Cpne3	-0.020746	1	-0.0639047	1	-0.0332013	1	1	-0.039284
Cpne8	-0.0854633	1	-0.0983	1	-0.0666018	1	1	-0.083455
Cpox	-0.0014372	1	0.0365394	1	-0.00369437	1	1	0.0104693
Cpq	0.101919	1.30969e-05	0.0734345	1	0.117586	1	0.000988123	0.0976465
Cpsf1	-0.030782	1	-0.0313043	1	-0.0174556	1	1	-0.026514
Cpsf2	-0.0406542	1	0.0529032	1	-0.0429648	1	1	-0.0102386
Cpsf3	0.00466975	1	-0.0196514	1	-0.0407064	1	1	-0.0185627
Cpsf4	0.00141543	1	-0.0319066	1	-0.0138576	1	1	-0.0147829
Cpsf6	-0.0501898	1	-0.0551848	1	-0.0606083	1	1	-0.0553276
Cpsf7	-0.00173574	1	0.043343	1	-0.00263306	1	1	0.0129914
Cpt1a	0.0191178	1	-0.00852708	1	0.00290352	1	1	0.00449808
Cpt1c	0.00180223	1	-0.00305807	1	0.0253098	1	1	0.00801799
Cpt2	-0.0113577	1	-0.0158606	1	0.00617598	1	1	-0.00701411
Cptp	0.00878185	1	0.0194908	1	0.00553705	1	1	0.0112699
Cr1l	0.0448076	1	0.0306337	1	0.0292901	1	1	0.0349104
Crabp2	0.310674	1.07447e-16	0.185416	6.92266e-06	0.160343	1	9.17183e-19	0.218811
Cradd	0.0263152	1	0.0147232	1	0.0139862	1	1	0.0183415
Cramp1l	0.0067524	1	0.0393703	1	0.0290597	1	1	0.0250608
Crat	-0.000384219	1	-0.00834107	1	-0.00545043	1	1	-0.00472524
Crbn	-0.0176479	1	-0.0404837	1	-0.0181527	1	1	-0.0254281
Crcp	0.0258569	1	0.0621233	1	-0.0137592	1	1	0.0247404
Creb1	-0.0136829	1	-0.0467001	1	-0.0469871	1	1	-0.03579
Creb3	-0.020157	1	0.0252992	1	-0.00237642	1	1	0.000921924
Creb3l2	0.0714884	0.584452	0.0937492	1	0.0368929	1	0.982644	0.0673768
Creb5	-0.00833742	1	-0.0111657	1	0.0304322	1	1	0.00364301
Crebbp	0.0169978	1	-0.0436517	1	-0.0656105	1	1	-0.0307548
Crebrf	0.0590021	1	-0.0277364	1	0.061161	1	1	0.0308089
Crebzf	-0.0231624	1	-0.0385797	1	-0.0266458	1	1	-0.0294626
Creg1	-0.04133	1	-0.0320319	1	-0.0126632	1	1	-0.0286751
Creld2	0.0472225	1	0.102068	1	0.0259819	1	1	0.0584241
Crem	-0.00306088	1	-0.0028663	1	0.0303897	1	1	0.00815417
Crim1	0.00518678	1	0.0338351	1	0.079612	1	1	0.0395446
Crip1	0.164614	0.0135624	0.170455	1	0.133624	1	0.197298	0.156231
Crip2	0.043548	1	0.20026	0.000116906	0.135946	1	0.00596723	0.126585
Cript	0.00757218	1	0.0103686	1	0.0205795	1	1	0.0128401
Crk	-0.00287525	1	0.0533284	1	0.00512788	1	1	0.018527
Crkl	0.00297794	1	0.000117669	1	-0.00673006	1	1	-0.00121148
Crlf2	-0.0776873	0.322424	-0.0598657	1	-0.0668934	1	0.893912	-0.0681488
Crlf3	-0.0100652	1	0.00335174	1	-0.0315985	1	1	-0.0127707
Crls1	-0.0281016	1	-0.0675878	1	-0.0290568	1	1	-0.0415821
Crnkl1	-0.0388339	1	-0.0650059	1	-0.0585014	1	1	-0.0541137
Crot	0.0358577	1	0.0508403	1	0.0541352	1	1	0.0469444
Crtap	0.0424519	1	0.00437772	1	0.0252942	1	1	0.0240412
Crtc1	0.0174061	1	0.00217767	1	0.00566909	1	1	0.00841763
Crtc2	0.0101594	1	-0.00871542	1	-0.0144913	1	1	-0.00434911
Crtc3	0.0158832	1	0.0188391	1	0.0184463	1	1	0.0177229
Cry1	0.0355335	1	0.048803	0.0419029	0.031222	1	0.385693	0.0385195
Cryab	-0.041601	1	0.149335	0.759272	0.199126	1	0.997164	0.102287
Crybg1	0.0447816	1	0.00292931	1	-0.00716765	1	1	0.0135144
Cryz	0.0481761	1	0.0653595	1	0.00430224	1	1	0.0392793
Cryzl1	-0.0244245	1	-0.024174	1	-0.0278422	1	1	-0.0254802
Cs	0.00628412	1	0.0258755	1	-0.0387658	1	1	-0.00220209
Csad	-0.00443499	1	-0.0137142	1	0.0417968	1	1	0.00788255
Csde1	0.0199592	1	0.0214353	1	-0.0120739	1	1	0.00977355
Cse1l	-0.039445	1	-0.104999	1	-0.037451	1	1	-0.0606316
Csf1	-0.0889437	1	-0.140077	1	-0.0941434	0.899448	0.999817	-0.107721
Csgalnact2	0.0208258	1	0.0193007	1	-0.0125625	1	1	0.00918802
Csk	0.0187375	1	0.0323524	1	-0.0209286	1	1	0.0100538
Csnk1a1	-0.0705266	1	-0.0632516	1	-0.0864992	1	1	-0.0734258
Csnk1d	-0.0105388	1	-0.0472095	1	-0.0398947	1	1	-0.0325477
Csnk1e	-0.0840147	1	-0.124298	1	-0.0953178	1	1	-0.10121
Csnk1g1	-0.0040428	1	-0.0366545	1	-0.0221159	1	1	-0.0209377
Csnk1g2	0.0280753	1	0.0646009	1	-0.00718228	1	1	0.028498
Csnk1g3	-0.0318651	1	-0.0372273	1	-0.00158405	1	1	-0.0235588
Csnk2a1	-0.0380321	1	-0.0723992	1	-0.0791931	1	1	-0.0632081
Csnk2a2	0.0351573	1	0.0522464	1	0.0109609	1	1	0.0327882
Csnk2b	0.00170208	1	0.0228363	1	0.0410597	1	1	0.021866
Cspg5	-0.00573999	1	-0.0424336	1	-0.0235033	1	1	-0.0238923
Cspp1	0.0023074	1	-0.0816816	1	-0.0107357	1	1	-0.0300366
Csrnp1	-0.0323917	1	-0.00822006	1	-0.00274537	1	1	-0.0144524
Csrp1	0.0192172	1	-0.0100007	1	-0.0258361	1	1	-0.00553985
Csrp2	0.399366	2.81364e-24	0.479216	9.93077e-20	0.481363	9.40041e-23	2.94337e-61	0.453315
Cst3	0.109021	0.293641	0.323502	3.79059e-07	0.30687	9.4875e-06	4.31713e-10	0.246464
Cstb	-0.0696604	1	-0.114426	1	-0.098916	1	1	-0.0943343
Cstf1	-0.00452182	1	-0.0138446	1	-0.0432506	1	1	-0.020539
Cstf2	0.00697555	1	-0.0367792	1	-0.0387938	1	1	-0.0228658
Cstf2t	0.0249945	1	-0.00135466	1	0.0282175	1	1	0.0172858
Cstf3	-0.00441237	1	-0.039943	1	0.0158349	1	1	-0.00950681
CT025619.1	-0.0248812	1	-0.0458535	1	-0.0154352	1	1	-0.0287233
Ctbp1	-0.0146459	1	-0.0126392	1	-0.0616418	1	1	-0.0296423
Ctbp2	-0.0187071	1	0.0599331	1	-0.0479967	1	1	-0.00225689
Ctbs	-0.00391955	1	0.0181028	1	-0.0089788	1	1	0.0017348
Ctc1	-0.0126917	1	-0.0290994	1	-0.043703	1	1	-0.028498
Ctcf	0.0455893	1	0.0276486	1	-0.0041171	1	1	0.0230403
Ctdnep1	0.0249597	1	0.0304569	1	0.0159619	1	1	0.0237928
Ctdp1	-0.022124	1	-0.0348675	1	-0.0232163	1	1	-0.0267359
Ctdsp1	0.0220998	1	0.0147559	1	0.00543229	1	1	0.014096
Ctdsp2	-0.0265913	1	-0.0519066	1	0.0320775	1	1	-0.0154735
Ctdspl	-0.00175948	1	-0.0360986	1	-0.0425724	1	1	-0.0268102
Ctdspl2	-0.0354128	1	-0.103068	1	-0.0526941	1	1	-0.0637248
Ctgf	0.0604151	1	0.0160825	1	-0.0249504	1	1	0.0171824
Cth	0.00709836	1	0.0561957	0.17909	-0.105747	1	0.75197	-0.014151
Ctif	0.00603943	1	0.00641903	1	-0.0143004	1	1	-0.000613998
Ctnna1	-0.0847924	1	-0.202692	0.00591396	-0.0999445	1	0.114087	-0.129143
Ctnnal1	-0.039762	1	-0.0100873	1	-0.0855848	1	1	-0.0451447
Ctnnb1	-0.080339	1	-0.0291912	1	-0.00178042	1	1	-0.0371035
Ctnnbip1	0.0568847	1	0.105616	0.140842	0.0266028	1	0.687471	0.0630345
Ctnnbl1	-0.0276185	1	-0.0900085	1	-0.0297605	1	1	-0.0491292
Ctnnd1	-0.0145097	1	-0.039437	1	-0.0309939	1	1	-0.0283135
Ctps	-0.0150709	1	0.0686262	1	-0.0657076	1	1	-0.00405075
Ctps2	-0.0142757	1	-0.0672936	1	-0.0341878	1	1	-0.0385857
Ctr9	0.0106631	1	0.00101417	1	0.0122361	1	1	0.00797112
Ctsa	-0.0294767	1	-0.0790466	1	0.0212297	1	1	-0.0290979
Ctsb	0.0126193	1	0.0661016	1	0.133689	0.777833	0.997808	0.0708032
Ctsc	0.0471245	1	0.00809741	1	-0.00264238	1	1	0.0175265
Ctsd	-0.00349898	1	0.0470626	1	0.0147462	1	1	0.0194366
Ctsl	-0.306974	9.03222e-16	-0.242245	0.00334454	-0.275263	8.71592e-10	5.09485e-24	-0.274828
Ctss	-0.013484	1	-0.0298971	1	-0.00584134	1	1	-0.0164075
Ctsz	-0.0113657	1	0.0237228	1	0.043225	1	1	0.0185274
Cttn	0.0235216	1	-0.0119231	1	0.0237011	1	1	0.0117665
Cttnbp2nl	0.0413526	1	0.0621255	1	0.0559478	1	1	0.053142
Ctu2	0.0312159	1	-0.0138593	1	0.0292054	1	1	0.0155207
Ctxn1	-0.0745996	1	-0.122168	1	-0.0473123	1	1	-0.0813599
Cuedc1	-0.00105714	1	-0.0291921	1	-0.0107769	1	1	-0.0136754
Cuedc2	0.0514605	1	0.0284745	1	0.123782	0.34913	0.909829	0.0679057
Cul1	-0.00034513	1	-0.0669959	1	-0.0545671	1	1	-0.040636
Cul2	0.00785717	1	-0.0146322	1	-0.0332135	1	1	-0.0133295
Cul3	0.0181595	1	0.00685151	1	-0.0700721	1	1	-0.0150204
Cul4a	-0.0469904	1	-0.0542314	1	-0.0619987	1	1	-0.0544068
Cul4b	0.0131288	1	-0.128776	1	-0.0447454	1	1	-0.0534641
Cul5	-0.00130764	1	-0.0113865	1	-0.0126067	1	1	-0.0084336
Cul7	0.0209877	1	-0.000940162	1	-0.029796	1	1	-0.00324951
Cuta	0.226253	2.35474e-20	0.318738	7.97876e-16	0.20611	7.22863e-06	5.84824e-37	0.250367
Cutc	-0.00354508	1	0.0139266	1	-0.0144225	1	1	-0.00134698
Cux1	0.0710735	0.148	0.0248054	1	0.0491211	1	0.700874	0.0483333
Cwc15	-0.0397238	1	-0.0111044	1	-0.160487	0.00344765	0.0784164	-0.0704385
Cwc22	-0.0388052	1	-0.0199729	1	-0.0570662	1	1	-0.0386148
Cwc25	-0.0497859	1	-0.0880725	1	-0.00668478	1	1	-0.048181
Cwc27	-0.035065	1	-0.00927937	1	-0.0318887	1	1	-0.025411
Cwf19l2	-0.00982501	1	-0.00751854	1	-0.069141	1	1	-0.0288282
Cx3cl1	-0.0107171	1	0.0405132	1	0.0331066	1	1	0.0209675
Cxadr	-0.0299315	1	-0.0244003	1	-0.0690879	1	1	-0.0411399
Cxcl1	-0.0235134	1	-0.11973	1	0.0359076	1	1	-0.0357786
Cxcl10	-0.256565	1	-0.306907	1	0.365267	1	1	-0.0660686
Cxcl2	0.0275447	1	0.038852	1	0.0203768	1	1	0.0289245
Cxcr6	0.0407976	1	0.0501765	1	0.038163	1	1	0.0430457
Cxxc1	0.0305905	1	-0.0303166	1	-0.0185743	1	1	-0.00610012
Cyb561d2	4.20584e-05	1	0.0290058	1	0.0224044	1	1	0.0171508
Cyb5a	0.0927407	0.0307368	-0.0224687	1	0.06337	1	0.324134	0.0445473
Cyb5b	0.000563828	1	0.0560501	1	0.00732477	1	1	0.0213129
Cyb5r1	-0.0526388	1	-0.0722671	1	-0.119394	1	1	-0.0814335
Cyb5r3	0.0352741	1	0.0584362	1	0.0858863	1	1	0.0598656
Cyb5r4	0.0151128	1	-0.0113274	1	-0.0165284	1	1	-0.00424767
Cyc1	-0.0168289	1	0.0193523	1	-0.0482675	1	1	-0.015248
Cycs	0.0135542	1	0.0858309	1	-0.0520543	1	1	0.0157769
Cyfip1	-0.00161333	1	-0.034781	1	-0.0321459	1	1	-0.0228467
Cyhr1	0.0290671	1	0.00525723	1	0.0136453	1	1	0.0159899
Cyld	0.0297971	1	-0.00732754	1	0.0267213	1	1	0.0163969
Cyp20a1	0.0100739	1	0.0261332	1	0.0138557	1	1	0.0166876
Cyp4f13	0.006916	1	-0.0120296	1	-0.00271292	1	1	-0.00260883
Cyp4f16	0.0473369	0.209259	0.0708813	0.0826925	0.047187	1	0.229897	0.0551351
Cyp51	0.118593	2.63167e-05	0.068892	1	0.0496471	1	0.00176709	0.079044
Cyr61	-0.00548314	1	0.105985	1	-0.0112865	1	1	0.0297384
Cystm1	-0.0287255	1	-0.0100198	1	-0.0519363	1	1	-0.0302272
Cyth1	-0.00559771	1	-0.0359076	1	-0.0314775	1	1	-0.0243276
Cyth2	0.00401513	1	-0.0353425	1	-0.0483869	1	1	-0.0265714
Cyth3	0.008853	1	0.0156764	1	0.0610824	1	1	0.0285373
D030045P18Rik	0.0371826	1.62311e-05	0.0560838	2.57576e-06	0.0523882	0.382758	5.35792e-09	0.0485515
D030056L22Rik	0.042616	1	-0.0175554	1	0.0182361	1	1	0.0144323
D10Jhu81e	-0.0019285	1	-0.00026533	1	-0.0242213	1	1	-0.00880504
D10Wsu102e	-0.00639909	1	-0.0242151	1	-0.0185111	1	1	-0.0163751
D16Ertd472e	0.00508731	1	0.0272797	1	0.0295567	1	1	0.0206412
D17Wsu92e	0.0919415	0.0447785	0.0809866	1	0.0997591	1	0.39986	0.0908957
D1Ertd622e	-0.0117691	1	0.0193877	1	-0.0149744	1	1	-0.0024519
D230025D16Rik	0.006495	1	-0.0107549	1	0.0046563	1	1	0.000132144
D3Ertd254e	0.00810435	1	0.011956	1	-0.0338854	1	1	-0.00460834
D3Ertd751e	0.0242433	1	0.0313048	1	0.00254374	1	1	0.0193639
D430042O09Rik	-0.0141973	1	0.0022948	1	-0.0173691	1	1	-0.0097572
D5Ertd579e	-0.0461556	1	-0.0491802	1	-0.0205262	1	1	-0.0386207
D5Ertd605e	-0.0486918	1	-0.0617194	1	-0.0195019	1	1	-0.0433043
D8Ertd738e	0.189395	9.63488e-20	0.178716	3.50993e-05	0.208178	5.00278e-10	4.94611e-30	0.192096
Daam1	-0.0113956	1	0.00285645	1	-0.00273897	1	1	-0.00375938
Dab2	0.0233016	1	0.00362778	1	-0.0362847	1	1	-0.00311844
Dab2ip	-0.017367	1	-0.0931027	1	-0.0367873	1	1	-0.0490856
Dad1	0.0801909	1	0.0927471	1	0.117355	1	1	0.0967645
Dag1	-0.0267794	1	-0.0426368	1	-0.0335297	1	1	-0.0343153
Dalrd3	0.000357821	1	0.00196599	1	-0.0173731	1	1	-0.00501643
Dand5	0.0302489	1	0.0227121	1	0.0281256	1	1	0.0270289
Dap	0.267354	2.06967e-25	0.268776	3.08578e-10	0.166956	0.00515039	1.18857e-33	0.234362
Dap3	-0.00549472	1	-0.0159287	1	-0.0157956	1	1	-0.0124063
Dapk3	0.0261066	1	0.00950595	1	0.0336416	1	1	0.0230847
Dapp1	-0.00417846	1	0.0114035	1	0.0116653	1	1	0.00629677
Dars	-0.0533317	1	-0.0739363	1	-0.0664009	1	1	-0.0645563
Daxx	0.0571159	0.219922	0.0239842	1	0.0623866	1	0.805203	0.0478289
Dazap1	0.0113673	1	0.0181398	1	-0.000351373	1	1	0.00971858
Dazap2	0.00216356	1	-0.00926841	1	-0.0233567	1	1	-0.0101539
Dbf4	0.0174404	1	0.0046633	1	-0.0964091	1	1	-0.0247685
Dbi	0.213409	2.8842e-09	0.293397	1.49246e-06	0.29685	2.30589e-06	1.09957e-17	0.267885
Dbn1	-0.124414	1.30286e-09	-0.189609	1.64087e-08	-0.0835168	1	1.65907e-14	-0.132513
Dbnl	-0.0834658	1	-0.0818292	1	-0.0214158	1	1	-0.062237
Dbp	0.0165462	1	-0.094262	1	-0.0236491	1	1	-0.0337883
Dbr1	-0.00529419	1	-0.034792	1	-0.0544043	1	1	-0.0314968
Dbt	0.0307097	1	0.0401426	1	-0.0369719	1	1	0.0112935
Dcaf1	-0.0366153	1	-0.0230625	1	-0.0697873	1	1	-0.043155
Dcaf10	0.0155404	1	0.023668	1	0.0132674	1	1	0.017492
Dcaf11	0.0154853	1	-0.00819455	1	0.049949	1	1	0.0190799
Dcaf12	-0.00335775	1	0.0528858	1	-0.0106231	1	1	0.0129683
Dcaf13	-0.0061303	1	-0.0383002	1	-0.0447597	1	1	-0.0297301
Dcaf15	0.0111212	1	0.0408463	1	-0.0119095	1	1	0.0133527
Dcaf17	-0.029038	1	-0.0511519	1	-0.012715	1	1	-0.0309683
Dcaf4	-0.0127199	1	-0.0318156	1	-0.0492174	1	1	-0.031251
Dcaf5	-0.0173378	1	-0.000357614	1	0.0253704	1	1	0.00255834
Dcaf6	0.00575449	1	-0.00573899	1	0.0106501	1	1	0.0035552
Dcaf7	0.0368227	1	-0.0254788	1	-0.000527938	1	1	0.00360532
Dcaf8	-0.0135781	1	-0.0586921	1	0.0307422	1	1	-0.0138427
Dcakd	-0.0382026	1	-0.0447273	1	-0.0162595	1	1	-0.0330631
Dcbld1	0.00119509	1	2.96361e-07	1	-0.00599259	1	1	-0.00159907
Dcbld2	0.00487042	1	-0.0107758	1	-0.0033758	1	1	-0.00309373
Dck	-0.0126018	1	0.00455912	1	-0.034443	1	1	-0.0141619
Dclk1	-0.0247427	1	-0.143065	1	-0.0275259	1	1	-0.0651112
Dclre1a	0.0138111	1	-0.0214845	1	0.0104339	1	1	0.000920175
Dcp2	-0.0123184	1	-0.0784239	1	-0.0120501	1	1	-0.0342641
Dcps	-0.0609234	1	-0.0561084	1	-0.0812775	1	1	-0.0661031
Dctd	-0.0836165	1	-0.054196	1	-0.0317842	1	1	-0.0565322
Dctn1	-0.00579947	1	-0.0452242	1	-0.00849131	1	1	-0.0198383
Dctn2	0.0368665	1	0.0232517	1	-0.0259037	1	1	0.0114048
Dctn3	0.0363903	1	0.114942	1	0.120828	1	1	0.0907201
Dctn4	-0.0566179	1	-0.12425	1	-0.0436522	1	1	-0.0748401
Dctn5	-0.0259821	1	-0.00614064	1	-0.0185877	1	1	-0.0169035
Dctn6	-0.0240046	1	-0.0597006	1	-0.00190818	1	1	-0.0285378
Dctpp1	-0.0221844	1	-0.0236544	1	-0.0685233	1	1	-0.0381207
Dcun1d1	-0.0172874	1	-0.0326095	1	-0.0650327	1	1	-0.0383099
Dcun1d2	0.00940749	1	0.00275151	1	0.000963473	1	1	0.00437416
Dcun1d5	-0.0310715	1	0.0142136	1	-0.202203	5.98574e-06	0.000510823	-0.0730203
Dcxr	0.0206844	1	-0.00399031	1	0.0152104	1	1	0.0106348
Dda1	0.122979	1.56895e-07	0.126527	0.211606	0.122719	0.571957	3.35787e-06	0.124075
Ddah1	0.0205025	1	0.0582153	1	0.0341024	1	1	0.0376067
Ddah2	-0.0344612	1	-0.0961876	1	-0.027279	1	1	-0.0526426
Ddb1	-0.028037	1	-0.0515792	1	0.0391342	1	1	-0.013494
Ddhd1	0.00832091	1	-0.0232007	1	0.000400671	1	1	-0.00482637
Ddhd2	-0.017559	1	-0.0338757	1	0.0210567	1	1	-0.010126
Ddi2	-0.0120675	1	-0.00476306	1	0.0174565	1	1	0.000208646
Ddit3	-0.0359564	1	-0.0540339	1	0.00102271	1	1	-0.0296559
Ddit4	0.0392865	1	-0.0609154	1	-0.0572457	1	1	-0.0262915
Ddost	0.0940354	0.448242	0.252368	1.76093e-10	0.160388	0.000869437	3.36724e-11	0.16893
Ddr2	0.0670346	1	0.0887503	1	0.0464786	1	1	0.0674212
Ddrgk1	-0.0842655	1	-0.240171	0.000150846	-0.0959457	1	0.00731793	-0.140127
Ddt	-0.0475333	1	-0.0292084	1	-0.0333244	1	1	-0.0366887
Ddx1	-0.0403039	1	-0.00367697	1	-0.0640017	1	1	-0.0359942
Ddx10	-0.0301458	1	-0.0216234	1	-0.0683212	1	1	-0.0400301
Ddx11	0.00295423	1	-0.00726898	1	-0.0155814	1	1	-0.00663206
Ddx17	-0.058887	1	-0.117884	1	-0.0759121	1	1	-0.0842276
Ddx18	-0.0368508	1	0.0233674	1	-0.044425	1	1	-0.0193028
Ddx19a	0.0109139	1	0.0422458	1	0.0628768	1	1	0.0386788
Ddx20	-0.0213756	1	0.0307775	1	-0.052611	1	1	-0.014403
Ddx21	-0.0510493	1	-0.0360057	1	-0.15888	0.319395	0.891955	-0.0819783
Ddx23	-0.0120327	1	0.0185531	1	-0.0439071	1	1	-0.0124622
Ddx24	0.0162664	1	0.0205693	1	-0.033867	1	1	0.000989598
Ddx27	-0.152878	0.000565341	-0.218224	0.00225406	-0.129637	1	0.000135954	-0.166913
Ddx28	0.00730145	1	0.024887	1	0.0447719	1	1	0.0256535
Ddx31	-0.018232	1	-0.0119877	1	-0.000255569	1	1	-0.0101584
Ddx39	0.138873	0.0412889	0.208324	0.0354833	0.112419	1	0.0422221	0.153205
Ddx39b	-0.211692	6.71833e-12	-0.134592	1	-0.240641	2.70612e-06	1.42254e-14	-0.195641
Ddx3x	0.0105482	1	-0.0398848	1	-0.0806943	1	1	-0.036677
Ddx41	-0.084892	1	-0.109164	1	-0.0884282	1	1	-0.0941613
Ddx42	-0.0366407	1	-0.0982746	1	-0.0671866	1	1	-0.0673673
Ddx46	-0.0522584	1	-0.0350763	1	-0.121687	1	1	-0.069674
Ddx47	-0.0557495	1	0.0065184	1	-0.0959339	1	1	-0.0483883
Ddx49	0.0361716	1	0.00467046	1	0.0330088	1	1	0.024617
Ddx5	-0.16634	0.0144824	-0.276627	3.38358e-07	-0.0583801	1	9.9567e-07	-0.167116
Ddx50	0.000544767	1	-0.0394125	1	-0.0391722	1	1	-0.0260133
Ddx51	-0.0145859	1	-0.00987533	1	-0.0154216	1	1	-0.0132943
Ddx52	-0.0239027	1	0.028067	1	-0.0798053	1	1	-0.0252137
Ddx54	0.0312282	1	-0.00431362	1	0.0447229	1	1	0.0238791
Ddx55	-0.0200928	1	-0.0301329	1	-0.0115482	1	1	-0.0205913
Ddx56	-0.0648824	1	-0.0765697	1	-0.0496184	1	1	-0.0636902
Ddx58	-0.0255486	1	-0.0203271	1	0.0125561	1	1	-0.0111065
Ddx59	0.0125322	1	0.0123093	1	-0.00726766	1	1	0.00585794
Ddx6	-0.00852643	1	-0.0809223	1	-0.0178344	1	1	-0.035761
Ddx60	-0.00933397	1	-0.0346184	1	0.0181557	1	1	-0.00859886
Deaf1	0.00378328	1	0.0292789	1	-0.00621476	1	1	0.00894915
Decr1	-0.0908629	1	-0.0811336	1	-0.048336	1	1	-0.0734442
Decr2	0.035046	0.92278	0.0270845	1	0.0518299	1	0.999919	0.0379868
Dedd	-0.000610355	1	-0.0327066	1	0.019663	1	1	-0.00455131
Def6	0.0289563	1	0.0091085	1	0.0298913	1	1	0.022652
Def8	0.00526251	1	-0.000698476	1	0.0202447	1	1	0.00826959
Degs1	0.0338585	1	0.0340752	1	-0.027087	1	1	0.0136155
Dek	-0.173895	0.078758	-0.160771	1	-0.375901	7.03357e-09	1.38186e-07	-0.236856
Dennd1a	-0.00150055	1	-0.0455368	1	-0.00945444	1	1	-0.0188306
Dennd1b	0.00828013	1	0.0202358	1	0.0151295	1	1	0.0145485
Dennd4a	-0.00251419	1	0.0159541	1	-0.00665042	1	1	0.00226316
Dennd4c	0.0291893	1	-0.00878035	1	0.0249969	1	1	0.0151353
Dennd5a	-0.0090303	1	-0.00702152	1	-0.030184	1	1	-0.0154119
Dennd5b	0.0114347	1	0.076609	1	-0.0604733	1	1	0.00919015
Dennd6a	-0.010307	1	-0.0267747	1	0.0149582	1	1	-0.00737448
Denr	-0.010424	1	-0.0601121	1	-0.0722866	1	1	-0.0476076
Depdc1a	0.0171732	1	0.0433103	1	-0.0108736	1	1	0.0165366
Depdc5	0.00112495	1	-0.00319273	1	-0.0123001	1	1	-0.0047893
Depdc7	-0.0306854	1	-0.0246866	1	-0.0179324	1	1	-0.0244348
Deptor	-0.0398588	1	-0.0505783	1	-0.0630803	1	1	-0.0511725
Dera	0.0197752	1	0.0438334	1	0.0336842	1	1	0.0324309
Derl1	-0.0702799	1	-0.0920459	1	-0.0565307	1	1	-0.0729521
Derl2	0.038499	1	0.0288476	1	0.0191781	1	1	0.0288416
Desi1	0.0410778	1	0.00645386	1	0.0143718	1	1	0.0206345
Desi2	0.00312845	1	0.0105692	1	-0.0212483	1	1	-0.00251686
Det1	-0.0153793	1	-0.0298565	1	-0.0132996	1	1	-0.0195118
Dexi	0.036199	1	0.0188034	1	0.0169453	1	1	0.0239825
Dgat1	-0.0209821	1	-0.0214295	1	0.00420247	1	1	-0.0127364
Dgcr14	-0.0149503	1	0.0016995	1	-0.0107596	1	1	-0.00800347
Dgcr2	0.00635898	1	-0.0173796	1	0.00347124	1	1	-0.00251646
Dgcr6	-0.0183254	1	-0.0482127	1	-0.0148832	1	1	-0.0271404
Dgcr8	0.00879762	1	-0.0259142	1	-0.0158581	1	1	-0.0109916
Dgkd	-0.000508414	1	-0.00256699	1	-0.0484184	1	1	-0.0171646
Dgkz	-0.0290347	1	-0.047554	1	-0.0126815	1	1	-0.0297567
Dguok	0.00121297	1	-0.0160171	1	0.00845496	1	1	-0.00211639
Dhcr7	0.0169853	1	0.0384817	1	0.0402171	1	1	0.0318947
Dhdds	-0.00899439	1	0.0156273	1	0.00765196	1	1	0.00476163
Dhfr	-0.0376955	1	-0.0311711	1	-0.108329	1	1	-0.0590652
Dhodh	0.00576086	1	0.0111094	1	0.00709975	1	1	0.00799002
Dhps	0.0848212	0.0958836	0.130644	1	0.0915342	1	0.584242	0.102333
Dhrs1	-0.0141649	1	0.0191276	1	0.00158794	1	1	0.00218355
Dhrs13	0.00553561	1	-0.0079026	1	-0.0273698	1	1	-0.00991226
Dhrs4	0.0359867	1	0.000116789	1	0.0464098	1	1	0.0275044
Dhrs7	-0.0947462	0.467933	-0.130418	0.541007	-0.137329	0.0921797	0.275786	-0.120831
Dhrs7b	0.0173357	1	0.00639449	1	0.0297783	1	1	0.0178362
Dhx15	0.00055458	1	0.0582842	1	-0.0758136	1	1	-0.00565826
Dhx16	-0.0245885	1	-0.0242871	1	-0.0133069	1	1	-0.0207275
Dhx29	-0.0342907	1	-0.00872417	1	-0.078087	1	1	-0.0403673
Dhx30	-0.0198822	1	-0.0227324	1	-0.000229284	1	1	-0.0142813
Dhx32	0.00385022	1	-0.0394922	1	-0.0191918	1	1	-0.0182779
Dhx33	-0.0147303	1	-0.0130277	1	-0.0180625	1	1	-0.0152735
Dhx36	-0.0265715	1	-0.0497715	1	-0.069641	1	1	-0.0486613
Dhx37	0.00740987	1	0.00637977	1	-0.0245523	1	1	-0.00358754
Dhx38	0.0355566	1	0.0442919	1	0.0520891	1	1	0.0439792
Dhx40	0.0224073	1	0.057833	1	0.00567811	1	1	0.0286395
Dhx57	0.00353073	1	-0.0129308	1	-0.0150677	1	1	-0.00815594
Dhx8	-0.0317043	1	-0.0722346	1	-0.0238836	1	1	-0.0426075
Dhx9	-0.0253373	1	-0.0448447	1	-0.0548648	1	1	-0.0416823
Diablo	0.0127943	1	0.0795677	0.0317718	0.0148055	1	0.33035	0.0357225
Diaph1	-0.0308566	1	-0.081471	1	-0.039192	1	1	-0.0505065
Diaph2	0.0165166	1	0.00351179	1	-0.000264139	1	1	0.00658808
Diaph3	-0.0164807	1	0.0234846	1	-0.0280696	1	1	-0.00702194
Dicer1	0.00585187	1	-0.0276635	1	-0.0114977	1	1	-0.0111031
Dido1	-0.0237581	1	-0.0591793	1	-0.0762137	1	1	-0.0530504
Diexf	0.0182291	1	-0.0159244	1	-0.0190322	1	1	-0.00557583
Dimt1	-0.0793262	1	-0.0579275	1	-0.122781	0.824219	0.998958	-0.0866781
Dip2a	-0.0149023	1	0.0119304	1	0.0213317	1	1	0.00611994
Dip2b	-0.00283771	1	0.00338292	1	0.0203355	1	1	0.00696023
Dip2c	-0.0352563	1	-0.0964988	1	-0.0500721	1	1	-0.060609
Dirc2	0.00300895	1	-0.0139128	1	0.0063099	1	1	-0.00153132
Dis3	0.00267292	1	0.0124495	1	-0.0211431	1	1	-0.00200691
Dis3l	0.00636246	1	0.00710425	1	-0.004635	1	1	0.0029439
Dis3l2	0.00491043	1	-0.0252692	1	-0.00398209	1	1	-0.00811363
Disp1	0.018265	1	0.0112164	1	0.00808556	1	1	0.0125223
Dixdc1	-0.00831798	1	0.0414382	1	0.00784952	1	1	0.0136566
Dkc1	-0.0317265	1	-0.192463	1	-0.110303	1	1	-0.111497
Dlat	-0.0399622	1	-0.0258054	1	-0.0357899	1	1	-0.0338525
Dlc1	0.0285147	1	0.020946	1	0.0365973	1	1	0.028686
Dld	-0.0403554	1	-0.0595327	1	-0.0790326	1	1	-0.0596403
Dlg1	0.00412742	1	-0.0248121	1	-0.0353629	1	1	-0.0186825
Dlg3	0.0353376	1	0.0271782	1	0.0152567	1	1	0.0259242
Dlg5	0.0140563	1	-0.0270798	1	-0.000745093	1	1	-0.00458954
Dlgap4	-0.0508892	1	-0.0562688	1	-0.00998102	1	1	-0.0390463
Dlgap5	-0.0317026	1	0.00254079	1	-0.0548282	1	1	-0.0279967
Dlk2	-0.0754163	1	-0.0745395	1	-0.0638523	1	1	-0.0712693
Dlst	-0.0251488	1	-0.0276895	1	-0.0407406	1	1	-0.031193
Dmac1	0.0360758	1	0.0838486	1	0.00719817	1	1	0.0423742
Dmac2	0.00255992	1	-0.00646589	1	0.000643386	1	1	-0.00108753
Dmap1	-0.0055658	1	0.0311278	1	0.0511585	1	1	0.0255735
Dmrta2	0.0125959	1	-0.0211317	1	-0.0259198	1	1	-0.0114852
Dmtf1	0.0173701	1	0.0413333	1	-0.0168497	1	1	0.0139512
Dmwd	0.00905931	1	-0.0382815	1	0.000661366	1	1	-0.00952027
Dmxl1	0.0140659	1	-0.0269709	1	-0.0158159	1	1	-0.00957363
Dnaaf5	-0.0138965	1	-0.00795113	1	-0.0141479	1	1	-0.0119985
Dnaja1	-0.0174284	1	0.0841218	0.140728	0.0257238	1	0.68725	0.0308057
Dnaja2	0.0500635	1	0.0635801	1	0.0392945	1	1	0.0509794
Dnaja3	-0.021578	1	0.0354416	1	-0.0168747	1	1	-0.0010037
Dnajb1	0.0235103	1	0.0951901	1	0.0571826	1	1	0.0586276
Dnajb11	0.0874698	0.208767	0.115597	0.894368	0.0896302	1	0.762973	0.0975658
Dnajb12	0.0454271	1	0.00956874	1	0.0277073	1	1	0.0275677
Dnajb14	0.0538713	1	-0.0119956	1	0.0225374	1	1	0.021471
Dnajb2	-0.0217785	1	-0.0744764	1	0.0291595	1	1	-0.0223651
Dnajb4	0.0173891	1	0.0892318	1	0.0143899	1	1	0.0403369
Dnajb6	-0.0148659	1	0.0260541	1	-0.103825	1	1	-0.0308788
Dnajb9	0.0530801	1	0.064363	1	0.00700032	1	1	0.0414811
Dnajc1	-0.0107518	1	-0.0623486	1	0.00436705	1	1	-0.0229111
Dnajc10	0.0312848	1	0.0296638	1	0.0898502	1	1	0.0502663
Dnajc11	-0.0493192	1	-0.0109297	1	-0.0168049	1	1	-0.0256846
Dnajc13	-0.0146097	1	-0.0457189	1	-0.0365743	1	1	-0.032301
Dnajc14	0.0106634	1	0.0208068	1	-0.00482083	1	1	0.00888313
Dnajc15	-0.0352579	1	-0.0519099	1	-0.125007	1	1	-0.0707248
[truncated: 6,557 more rows]

## Sheet: Clone1072_FindMarkers_by_sample
gene	logFC.DV1	adj.p.DV1	logFC.DV2	adj.p.DV2	logFC.DV3	adj.p.DV3	fisher.combined.pvalue	mean.logFC
0610009B22Rik	0.001858	1	-0.0216017	1	-0.01092	1	1	-0.0102212
0610009O20Rik	0.0438493	1	0.0181827	1	0.0178803	1	1	0.0266374
0610010F05Rik	0.001047	1	0.00400149	1	0.102711	1	1	0.03592
0610010K14Rik	-0.0189544	1	0.0380716	1	-0.0340484	1	1	-0.00497708
0610012G03Rik	-0.0325602	1	-0.0719973	1	0.0799594	1	1	-0.00819938
0610030E20Rik	-0.0380209	1	-0.0153435	1	0.060963	1	1	0.00253287
0610037L13Rik	0.105105	1	0.123169	1	-0.00817016	1	1	0.0733682
1110002L01Rik	0.00179362	1	0.0279175	1	-0.0107348	1	1	0.00632547
1110004E09Rik	0.0965939	1	0.0858281	1	-0.0120088	1	1	0.0568044
1110004F10Rik	-0.0187881	1	0.0562694	1	0.112315	1	1	0.0499321
1110008F13Rik	-0.00318752	1	-0.114575	1	-0.0207677	1	1	-0.0461767
1110008L16Rik	0.0431484	1	0.0324732	1	-0.00931105	1	1	0.0221035
1110008P14Rik	-0.074405	1	0.00972984	1	-0.0184467	1	1	-0.0277073
1110012L19Rik	-0.0864353	1	-0.152828	1	0.0668144	1	1	-0.057483
1110032A03Rik	0.00295244	1	0.00283447	1	0.05082	1	1	0.018869
1110038F14Rik	0.071301	1	0.0536021	1	-0.0111341	1	1	0.037923
1110046J04Rik	-0.0278279	1	0.00337787	1	-0.0179507	1	1	-0.0141336
1110059E24Rik	0.0283838	1	-0.0160769	1	0.0147041	1	1	0.00900366
1110059G10Rik	-0.0782251	1	-0.0681366	1	0.034746	1	1	-0.0372053
1110065P20Rik	-0.0237629	1	0.192553	1	0.0852034	1	1	0.0846646
1190002N15Rik	0.0903787	1	0.00931806	1	0.0446747	1	1	0.0481238
1190007I07Rik	0.0355437	1	0.0181509	1	0.0878497	1	1	0.0471814
1300002E11Rik	0.0469126	1	0.0406044	1	-0.0439545	1	1	0.0145208
1500011B03Rik	0.0284794	1	0.110728	1	0.0211403	1	1	0.0534491
1500011K16Rik	-0.0451607	1	0.136688	1	-0.0668465	1	1	0.00822699
1600002K03Rik	0.00261752	1	-0.000204378	1	-0.00387798	1	1	-0.000488281
1600012H06Rik	0.140212	1	0.00439588	1	0.0333411	1	1	0.0593162
1600020E01Rik	-0.0150103	1	-0.0173908	1	-0.0203126	1	1	-0.0175712
1700012B09Rik	-0.130342	1	0.323325	1	0.15459	1	1	0.115857
1700017B05Rik	-0.0292488	1	-0.0115274	1	0.0344806	1	1	-0.00209856
1700020I14Rik	-0.0719222	1	-0.0871361	1	0.103746	1	1	-0.0184373
1700021F05Rik	0.056546	1	0.103806	1	0.040746	1	1	0.0670325
1700025G04Rik	0.034297	1	-0.0178755	1	0.11588	1	1	0.0441004
1700037H04Rik	-0.00444259	1	-0.0867413	1	-0.00239397	1	1	-0.0311926
1700052K11Rik	-0.0686666	1	-0.0164298	1	0.0533593	1	1	-0.010579
1700086O06Rik	-0.0334158	1	-0.0103704	1	-0.0352977	1	1	-0.0263613
1700123O20Rik	0.029456	1	0.0861713	1	0.0128924	1	1	0.0428399
1810009A15Rik	0.00901994	1	0.00648096	1	0.14408	1	1	0.0531936
1810013L24Rik	-0.00071265	1	-0.0749985	1	-0.0838245	1	1	-0.0531786
1810022K09Rik	-0.181386	1	-0.0815224	1	-0.0397094	1	1	-0.100873
1810030O07Rik	0.00692361	1	-0.0574067	1	0.157471	1	1	0.0356627
1810032O08Rik	-0.0328008	1	-0.0445125	1	-0.0635907	1	1	-0.046968
1810037I17Rik	-0.0708807	1	0.172865	1	0.165965	1	1	0.0893164
1810043G02Rik	-0.0565972	1	-0.00493331	1	0.0449417	1	1	-0.00552962
1810055G02Rik	0.0174826	1	0.0154265	1	-0.0481562	1	1	-0.00508238
1810058I24Rik	-0.180226	1	0.0826956	1	0.113469	1	1	0.00531269
1810062G17Rik	-0.0176478	1	0.0335176	1	-0.0192917	1	1	-0.00114064
2010107E04Rik	-0.143262	1	0.0234061	1	0.118272	1	1	-0.000527928
2010111I01Rik	-0.179599	1	-0.11186	1	-0.0634047	1	1	-0.118288
2010320M18Rik	-0.0845968	1	0.0528119	1	-0.0176296	1	1	-0.0164715
2200002D01Rik	-0.281127	1	0.021625	1	0.16704	1	1	-0.0308204
2210016L21Rik	0.0531641	1	0.0649952	1	-0.00953956	1	1	0.0362066
2210408I21Rik	-0.00215964	1	-0.0131142	1	0.0493766	1	1	0.0113676
2300009A05Rik	-0.0947481	1	-0.00370353	1	0.142666	1	1	0.0147383
2310009B15Rik	-0.0481948	1	0.191589	1	0.00126687	1	1	0.0482203
2310011J03Rik	-0.0327828	1	0.0541784	1	0.0977285	1	1	0.0397081
2310022A10Rik	-0.0236832	1	-0.0199398	1	0.0179035	1	1	-0.00857317
2310022B05Rik	-0.0855155	1	0.00732701	1	0.0063438	1	1	-0.0239482
2310030G06Rik	0.0101337	1	-0.014873	1	0.0869338	1	1	0.0273982
2310033P09Rik	0.0384133	1	0.0230966	1	-0.0273921	1	1	0.0113726
2310035C23Rik	0.037098	1	0.0648735	1	0.0295258	1	1	0.0438324
2310039H08Rik	0.0021554	1	0.0935051	1	0.0493116	1	1	0.048324
2310057M21Rik	0.0161422	1	0.00769498	1	-0.0108344	1	1	0.00433427
2310061I04Rik	0.172686	1	0.129648	1	-0.0400734	1	1	0.0874201
2410002F23Rik	0.019967	1	-0.031606	1	0.0527728	1	1	0.0137113
2410004B18Rik	0.141271	1	0.0676807	1	-0.0854139	1	1	0.0411791
2410015M20Rik	0.24579	0.0213818	0.0791766	1	0.168371	1	0.261672	0.164446
2410089E03Rik	0.0255668	1	0.0165495	1	0.14685	1	1	0.0629887
2410131K14Rik	0.0116501	1	0.0706805	1	-0.090228	1	1	-0.00263245
2510002D24Rik	0.050434	1	-0.0329266	1	0.0236759	1	1	0.0137277
2510039O18Rik	-0.0148142	1	0.106451	1	0.0645094	1	1	0.0520487
2610001J05Rik	0.0182004	1	0.0283021	1	0.0746995	1	1	0.0404006
2610002M06Rik	-0.119422	1	-0.274249	0.0642466	0.153226	1	0.48266	-0.0801482
2610301B20Rik	0.0152406	1	0.0219546	1	-0.0160515	1	1	0.00704791
2610507B11Rik	0.0387823	1	0.0958386	1	-0.0569825	1	1	0.0258795
2610524H06Rik	0.108774	1	0.137245	1	0.113497	1	1	0.119839
2700038G22Rik	0.0326807	1	-0.00174614	1	0.0519482	1	1	0.0276276
2700049A03Rik	0.0161368	1	0.0208148	1	-0.0231156	1	1	0.00461198
2700062C07Rik	-0.0142594	1	-0.0686486	1	-0.0902682	1	1	-0.0577254
2700081O15Rik	0.0993746	1	-0.0554376	1	-0.0367884	1	1	0.00238287
2700097O09Rik	0.0256482	1	-0.00347909	1	0.00647636	1	1	0.0095485
2810004N23Rik	0.0719871	1	0.0135369	1	0.138895	1	1	0.0748063
2810006K23Rik	0.0191486	1	0.00689068	1	-0.0570705	1	1	-0.0103438
2810403A07Rik	-0.00898207	1	-0.0287861	1	-0.0235832	1	1	-0.0204505
2810474O19Rik	-0.138119	1	-0.0632766	1	-0.00191336	1	1	-0.0677696
2900026A02Rik	0.0537115	1	0.0184452	1	0.085617	1	1	0.0525913
2900060B14Rik	-0.0155392	1	-0.0258138	1	-0.0128791	1	1	-0.0180774
2900097C17Rik	-0.089465	1	-0.159721	1	-0.052022	1	1	-0.100403
3010003L21Rik	0.0233985	1	-0.0035836	1	-0.011748	1	1	0.00268896
3110002H16Rik	0.0138251	1	-0.0503356	1	-0.0243312	1	1	-0.0202806
3110009E18Rik	0.043185	1	0.0254169	1	-0.0544566	1	1	0.00471511
3110040N11Rik	-0.0227827	1	-0.0134174	1	0.0228202	1	1	-0.00445998
3110043O21Rik	-0.04124	1	-0.0385139	1	0.0379182	1	1	-0.0139452
3110062M04Rik	0.0322813	1	-0.0279973	1	0.0155127	1	1	0.00659894
3110082I17Rik	0.0778902	1	0.0604194	1	0.0486013	1	1	0.0623036
3300005D01Rik	-0.0425764	1	-0.0460832	1	-0.0695699	1	1	-0.0527432
3830403N18Rik	-0.125167	1	-0.105851	1	0.365468	1	1	0.0448166
3830406C13Rik	-0.0538492	1	-0.0040013	1	0.126268	1	1	0.0228058
4632415L05Rik	-0.0794118	1	-0.0428645	1	-0.0341111	1	1	-0.0521291
4833420G17Rik	-0.105977	1	-0.0657524	1	-0.128264	1	1	-0.0999978
4833439L19Rik	-0.0706675	1	-0.0961533	1	-0.0336491	1	1	-0.0668233
4921524J17Rik	-0.130792	1	0.120546	1	-0.0168058	1	1	-0.00901719
4930402H24Rik	-0.0294882	1	-0.0634409	1	0.0314423	1	1	-0.0204956
4930430F08Rik	0.0530964	1	0.0190926	1	0.0718579	1	1	0.0480157
4930453N24Rik	0.0641533	1	-0.02392	1	0.048678	1	1	0.0296371
4930503L19Rik	-0.0158356	1	0.0209535	1	-0.0218641	1	1	-0.00558203
4930523C07Rik	-0.0568296	1	-0.154631	1	-0.385062	1	1	-0.198841
4930579G24Rik	0.0657945	1	0.022282	1	0.0663857	1	1	0.0514874
4931406C07Rik	-0.0498083	1	-0.0650799	1	-0.0394628	1	1	-0.0514503
4931406P16Rik	-0.0334907	1	-0.00304249	1	0.0862785	1	1	0.0165818
4931428F04Rik	-0.0581471	1	0.017641	1	0.0766241	1	1	0.0120393
4932422M17Rik	-0.0047274	1	0.0184604	1	0.00353429	1	1	0.00575576
4932438A13Rik	0.0382842	1	-0.0601661	1	0.0940728	1	1	0.0240636
4933404O12Rik	-0.00704765	1	-0.0163591	1	0.00120761	1	1	-0.00739973
4933427D14Rik	-0.0223292	1	-0.0236381	1	-0.0422866	1	1	-0.029418
4933434E20Rik	0.0353635	1	0.0595314	1	0.0212853	1	1	0.0387267
5031425E22Rik	-0.0386078	1	0.0019674	1	0.0322865	1	1	-0.00145131
5031439G07Rik	-0.00361289	1	0.0151935	1	-0.00810888	1	1	0.00115724
5033406O09Rik	-0.015984	1	0.00715438	1	0.032091	1	1	0.00775378
5430416N02Rik	0.0807566	1	-0.0342886	1	-0.0248694	1	1	0.00719951
5430421F17Rik	-0.0116631	1	0.0868784	1	0.013335	1	1	0.0295168
5730455P16Rik	0.0154106	1	-0.0315202	1	-0.00759109	1	1	-0.00790022
5730480H06Rik	0.0718506	1	0.0827933	1	-0.0574642	1	1	0.0323932
5730559C18Rik	0.0084347	1	-0.0970549	1	0.0278243	1	1	-0.0202653
5930430L01Rik	-0.0625417	1	0.000872741	1	0.0837253	1	1	0.0073521
6030458C11Rik	0.00757653	1	-0.027255	1	-0.0200394	1	1	-0.0132393
8030462N17Rik	-0.0131149	1	-0.0585618	1	-0.021899	1	1	-0.0311919
9030025P20Rik	0.0647803	1	0.0342311	1	-0.0843853	1	1	0.00487535
9030624J02Rik	-0.0479467	1	-0.00637969	1	0.0988412	1	1	0.0148383
9130401M01Rik	0.153866	1	0.0886758	1	0.140878	1	1	0.127807
9230110C19Rik	-0.025801	1	0.0400823	1	-0.067178	1	1	-0.0176323
9430015G10Rik	0.0125123	1	0.0406973	1	0.0970554	1	1	0.0500883
9430038I01Rik	0.00906975	1	-0.0340211	1	0.00850045	1	1	-0.00548364
9530068E07Rik	0.0109594	1	-0.021523	1	-0.147046	1	1	-0.0525367
9530082P21Rik	0.0137206	1	0.0378486	1	0.0821352	1	1	0.0445681
9930021J03Rik	-0.0335317	1	-0.0275094	1	0.0184312	1	1	-0.0142033
A230050P20Rik	0.0514572	1	0.0638437	1	0.102282	1	1	0.0725276
A330069E16Rik	-0.0603979	1	-0.0375708	1	-0.0105888	1	1	-0.0361858
A430005L14Rik	0.0952878	1	0.213394	0.0918488	-0.0276883	1	0.572949	0.0936645
A630089N07Rik	0.064409	1	-0.00232883	1	0.0127554	1	1	0.0249452
AA467197	-0.107104	1	-0.0411168	1	0.122749	1	1	-0.00849059
Aaas	0.114825	0.991721	0.0357005	1	-0.0328325	1	1	0.0392309
Aacs	0.00564261	1	0.00243688	1	-0.00242232	1	1	0.00188572
Aaed1	-0.0849622	1	-0.0675751	1	0.00380227	1	1	-0.0495783
Aak1	0.0164595	1	0.0241211	1	-0.0254016	1	1	0.00505965
Aamdc	0.0133411	1	0.0431789	1	-0.0289517	1	1	0.00918943
Aamp	0.212122	0.184447	0.181613	1	0.123427	1	0.759757	0.172387
Aar2	-0.0292849	1	-0.000615161	1	0.00313196	1	1	-0.0089227
Aars	0.000629121	1	0.207033	1	0.162238	1	1	0.1233
Aasdhppt	0.0815792	1	0.17274	1	0.0195264	1	1	0.091282
Aatf	0.156519	1	0.0135794	1	0.218155	1	1	0.129418
Abca1	-0.0156453	1	0.0252616	1	0.111313	1	1	0.0403098
Abca3	0.0385358	1	-0.00316265	1	-0.0548268	1	1	-0.00648452
Abca5	0.013753	1	-0.00982237	1	0.027752	1	1	0.0105609
Abcb10	0.00620885	1	-0.00901981	1	0.0884241	1	1	0.0285377
Abcb7	0.055615	1	-0.0814427	1	-0.000172038	1	1	-0.00866661
Abcb8	0.0190948	1	0.00884099	1	-0.0333474	1	1	-0.00180385
Abcb9	-0.0609266	1	-0.0418078	1	-0.0664518	1	1	-0.0563954
Abcc1	-0.00386582	1	-0.0825763	1	0.032191	1	1	-0.0180837
Abcd3	0.0498177	1	0.0362866	1	0.161301	1	1	0.0824685
Abcd4	-0.0239258	1	0.0554357	1	-0.0396696	1	1	-0.0027199
Abce1	0.0532217	1	0.12908	1	0.101707	1	1	0.0946696
Abcf1	0.387628	9.13211e-08	0.234682	0.211589	0.116598	1	3.41054e-06	0.246303
Abcf2	0.126387	1	0.0553168	1	-0.0140514	1	1	0.0558842
Abcf3	0.0153431	1	-0.0191208	1	0.0642352	1	1	0.0201525
Abcg2	0.0885042	1	0.0139174	1	-0.0826123	1	1	0.0066031
Abhd10	0.0221271	1	0.0682616	1	-0.0265585	1	1	0.0212767
Abhd11	-0.00817962	1	0.0733803	1	-0.0242549	1	1	0.0136486
Abhd12	-0.011874	1	0.021933	1	-0.13046	1	1	-0.0401336
Abhd13	0.0338632	1	0.00616423	1	0.0872041	1	1	0.0424105
Abhd14a	-0.020787	1	0.0588295	1	-0.0141233	1	1	0.00797307
Abhd16a	0.0651358	1	0.0827069	1	0.0267011	1	1	0.0581812
Abhd17a	-0.0269774	1	0.0379396	1	0.127218	1	1	0.04606
Abhd17b	0.0401275	1	-0.0358432	1	0.050207	1	1	0.0181638
Abhd17c	0.00460698	1	-0.0477262	1	-0.027612	1	1	-0.0235771
Abhd18	0.122188	1	0.0468359	1	0.0443965	1	1	0.0711401
Abhd2	-0.0273714	1	0.139752	1	0.0683142	1	1	0.0602316
Abhd4	0.00512027	1	0.0220758	1	-0.0402162	1	1	-0.00434003
Abhd5	-0.0768247	1	-0.0557012	1	0.0482595	1	1	-0.0280888
Abhd6	0.0932429	0.783873	0.0517873	1	0.0380951	1	0.997993	0.0610418
Abhd8	-0.0563055	1	0.0698029	1	-0.0238457	1	1	-0.00344944
Abi1	-0.0892122	1	-0.103556	1	0.0520468	1	1	-0.046907
Abi2	0.0602759	1	0.0626227	1	-0.0108501	1	1	0.0373495
Abl1	-0.0247072	1	-0.031034	1	-0.0945949	1	1	-0.050112
Abl2	-0.0563563	1	0.0329312	1	0.0322742	1	1	0.00294971
Abr	-0.0223794	1	0.0493385	1	0.0261895	1	1	0.0177162
Abracl	-0.0923665	1	-0.0385842	1	-0.0513623	1	1	-0.060771
Abraxas1	0.0646004	1	0.0478271	1	-0.030943	1	1	0.0271615
Abraxas2	0.144566	1	-0.0101293	1	-0.0347637	1	1	0.0332243
Abt1	0.0107085	1	-0.051704	1	-0.129032	1	1	-0.0566759
AC127341.3	0.089817	1	0.0638841	1	0.0828313	1	1	0.0788441
AC149090.1	0.111087	1	0.0324289	1	0.264502	1	1	0.136006
AC160336.1	0.502205	0.11423	0.274754	0.639409	-0.179516	1	0.514231	0.199147
AC165953.2	-0.0149254	1	0.0286785	1	-0.0302019	1	1	-0.0054829
AC166344.1	0.0821029	5.4917e-10	0.071768	0.142349	0.171228	1.20134e-15	1.61445e-22	0.108366
AC191865.2	0.000177477	1	-0.0221531	1	-0.0908448	1	1	-0.0376068
Acaa1a	-0.0016912	1	-0.0512116	1	-0.013429	1	1	-0.0221106
Acaa2	-0.0432151	1	-0.0464443	1	0.0723421	1	1	-0.00577243
Acaca	0.0189428	1	0.0676956	1	-0.00899884	1	1	0.0258799
Acad8	0.0398387	1	-0.0150783	1	0.00601388	1	1	0.0102581
Acad9	0.0907496	1	0.077099	1	0.065293	1	1	0.0777139
Acadl	0.146198	1	0.0755173	1	0.142674	1	1	0.121463
Acadm	0.106259	1	0.067754	1	0.13467	1	1	0.102894
Acads	0.0512724	1	-0.0141174	1	-0.113183	1	1	-0.0253426
Acadsb	-0.0144167	1	-0.0364717	1	0.044346	1	1	-0.00218079
Acadvl	-0.00423317	1	0.099791	1	-0.0858173	1	1	0.00324686
Acap1	-0.0878514	1	-0.110017	1	-0.0782939	1	1	-0.0920542
Acap2	0.0105271	1	0.0167092	1	0.0572745	1	1	0.0281703
Acap3	-0.00237324	1	-0.0111629	1	0.031045	1	1	0.00583628
Acat1	-0.0423524	1	0.0244065	1	0.0886709	1	1	0.023575
Acat2	0.0792985	1	0.00287204	1	0.0294691	1	1	0.0372132
Acbd3	-0.0617379	1	0.0186019	1	0.138032	1	1	0.0316321
Acbd4	-0.0151018	1	-0.007467	1	0.0179149	1	1	-0.00155132
Acbd5	-0.0494884	1	0.0639372	1	-0.0212772	1	1	-0.00227613
Acbd6	-0.0115234	1	-0.0225072	1	0.0528009	1	1	0.00625677
Acd	0.015717	1	0.0396797	1	-0.0253234	1	1	0.0100245
Acer3	0.033441	1	0.00285174	1	0.0555489	1	1	0.0306139
Acin1	0.0919626	1	0.0907664	1	0.167088	1	1	0.116606
Acly	-0.0540925	1	-0.0466821	1	-0.0852351	1	1	-0.0620032
Aco1	0.0658368	1	0.042628	1	0.0171591	1	1	0.0418746
Aco2	0.039374	1	0.0596256	1	-0.125877	1	1	-0.00895913
Acot1	-0.00182514	1	-0.00534437	1	0.0492163	1	1	0.0140156
Acot13	-0.0271825	1	0.0091974	1	0.0104248	1	1	-0.00252013
Acot2	-0.00631826	1	0.0497813	1	-0.0604706	1	1	-0.00566919
Acot7	0.0417522	1	0.155522	1	-0.0266677	1	1	0.0568688
Acot8	0.0321529	1	-0.00642181	1	0.0331524	1	1	0.0196278
Acot9	-0.226795	1	-0.248748	1	0.0349413	1	1	-0.146867
Acox1	-0.0129318	1	0.0149108	1	-0.0376863	1	1	-0.0119025
Acp1	0.0703975	1	0.0968628	1	0.0111819	1	1	0.0594807
Acp2	-0.00924741	1	-0.0125247	1	-0.0176574	1	1	-0.0131432
Acp6	-0.0391847	1	0.0474312	1	0.164617	1	1	0.0576213
Acsbg1	-0.00710394	1	-0.00558817	1	0.0481761	1	1	0.011828
Acsl1	0.012106	1	-0.0217671	1	-0.0185454	1	1	-0.00940217
Acsl3	-0.0503019	1	-0.0565166	1	-0.0609807	1	1	-0.055933
Acsl4	-0.0797188	1	-0.019488	1	0.0872654	1	1	-0.00398044
Acsl5	-0.080126	1	-0.0169536	1	-0.123196	1	1	-0.0734253
Acss2	-0.0418665	1	0.0242735	1	0.0433617	1	1	0.00858953
Actb	0.0873593	1	-0.0588722	1	-0.0561367	1	1	-0.00921653
Actg1	0.0805025	1	0.135165	1	0.0116001	1	1	0.0757557
Actl6a	0.12068	1	0.118962	1	-0.0773415	1	1	0.0541003
Actn1	-0.107394	1	-0.0758285	1	0.0332885	1	1	-0.0499779
Actn4	0.117794	1	0.194166	1	0.103609	1	1	0.138523
Actr10	-0.00663782	1	0.0694163	1	-0.0911535	1	1	-0.00945834
Actr1a	0.115546	1	-0.0432792	1	-0.0325373	1	1	0.0132432
Actr1b	0.0252237	1	0.055672	1	-0.117265	1	1	-0.0121231
Actr2	0.0323693	1	0.0719348	1	0.0526464	1	1	0.0523169
Actr3	0.0449084	1	0.121554	1	0.0294162	1	1	0.065293
Actr6	0.0184843	1	0.0334982	1	-0.0744264	1	1	-0.00748129
Actr8	0.160766	0.0188691	0.0257457	1	0.0181066	1	0.242498	0.068206
Acvr1	-0.0919368	1	-0.0991983	1	-0.0258449	1	1	-0.0723266
Acy1	-0.042654	1	-0.0161386	1	0.0577817	1	1	-0.000336956
Acyp1	-0.00632244	1	0.026962	1	0.0018216	1	1	0.00748704
Acyp2	-0.0339861	1	-0.0693265	1	0.0147533	1	1	-0.0295198
Ada	-0.014646	1	-0.0352103	1	-0.0237397	1	1	-0.024532
Adam10	-0.0335909	1	-0.0322384	1	-0.0121561	1	1	-0.0259952
Adam15	0.0551997	1	0.101006	1	0.0326278	1	1	0.0629443
Adam17	0.167647	1	0.0846623	1	0.110593	1	1	0.120967
Adam9	-0.0207111	1	0.00183208	1	-0.0162865	1	1	-0.0117218
Adamts1	0.0896938	1	0.0114439	1	-0.0739967	1	1	0.00904702
Adamts4	-0.19225	1	-0.0729374	1	0.0226561	1	1	-0.0808436
Adamtsl5	0.0341483	1	0.0691784	1	-0.0239834	1	1	0.0264478
Adar	0.00789079	1	0.0493615	1	0.00925288	1	1	0.0221684
Adarb1	-0.0499021	1	-0.0707303	1	-0.027315	1	1	-0.0493158
Adat2	-0.0104543	1	-0.0358804	1	-0.00576648	1	1	-0.017367
Adck1	-0.0247264	1	-0.00440486	1	-0.0396147	1	1	-0.0229153
Adck5	-0.0259592	1	0.0479563	1	0.0153691	1	1	0.0124554
Adcy3	0.0342972	1	0.0732626	1	0.0391847	1	1	0.0489148
Adcy6	0.0350458	1	-0.0339185	1	-0.0876063	1	1	-0.0288263
Adcy7	0.0178247	1	-0.0548963	1	0.00201845	1	1	-0.0116844
Add1	-0.120712	1	-0.0520477	1	0.0310204	1	1	-0.0472464
Add3	-0.022023	1	-0.055939	1	-0.0177157	1	1	-0.0318926
Adgra3	-0.0091163	1	-0.0027448	1	-0.0368707	1	1	-0.0162439
Adgre5	-0.136962	1	0.0570478	1	-0.152411	1	1	-0.0774416
Adgrl1	-0.0146147	1	0.0910137	1	0.0757106	1	1	0.0507032
Adgrl3	0.0487506	1	-0.0094896	1	0.159891	1	1	0.0663839
Adh5	0.0741328	1	0.0515374	1	-0.14328	1	1	-0.00586992
Adh7	0.0338044	1	0.0391742	1	0.0382258	1	1	0.0370681
Adi1	-0.0462384	1	-0.0191457	1	0.0254535	1	1	-0.0133102
Adipor1	-0.0998001	1	0.106911	1	-0.0374566	1	1	-0.0101154
Adipor2	-0.0433729	1	-0.0748518	1	-0.00940634	1	1	-0.0425437
Adk	0.218452	1	0.082482	1	-0.0175423	1	1	0.094464
Adm	0.0568642	1	0.137054	1	0.220448	1	1	0.138122
Adnp	-0.0357063	1	-0.0558336	1	0.0565882	1	1	-0.0116506
Ado	0.0782662	1	0.0414521	1	-0.0536557	1	1	0.0220208
Adpgk	0.0204316	1	0.0277554	1	-0.0608671	1	1	-0.00422668
Adprh	-0.0302974	1	0.109174	1	-0.071579	1	1	0.0024326
Adprhl2	0.0771709	1	-0.0157803	1	0.0127472	1	1	0.0247126
Adprm	0.0134661	1	0.0480853	1	-0.0102948	1	1	0.0170855
Adrb2	-0.0522327	1	-0.0550223	1	-0.0317223	1	1	-0.0463258
Adrm1	0.0630996	1	0.0365804	1	0.0710578	1	1	0.0569126
Adsl	0.112659	1	0.0336839	1	0.151733	1	1	0.0993586
Adss	0.107826	1	0.0221284	1	0.0635097	1	1	0.0644882
Adssl1	-0.114559	1	-0.0768182	1	-0.154407	1	1	-0.115262
Aebp1	-0.116435	1	-0.0849737	1	-0.242365	1	1	-0.147924
Aebp2	-0.0442495	1	0.0253449	1	-0.0403371	1	1	-0.0197472
Aen	0.0873216	1	0.0830786	1	0.136515	1	1	0.102305
Aes	-0.227924	1	-0.0445935	1	-0.139345	1	1	-0.137287
Afap1	-0.0355203	1	-0.0545273	1	-0.0607473	1	1	-0.050265
Afdn	0.0487366	1	0.0530657	1	-0.143254	1	1	-0.0138174
Aff1	0.0130045	1	-0.0294169	1	-0.0185674	1	1	-0.0116599
Aff4	-0.133244	1	-0.00797827	1	-0.0926932	1	1	-0.0779719
Afg3l1	0.0210304	1	-0.00133607	1	0.222993	1	1	0.0808957
Afg3l2	-0.0203965	1	-0.0286555	1	0.135355	1	1	0.0287678
Afp	-0.12999	1	0.149609	1	-0.190624	1	1	-0.0570018
Aftph	-0.111128	1	0.0563651	1	0.101079	1	1	0.0154386
Aga	0.0415948	1	0.0244743	1	0.00664517	1	1	0.0242381
Agap1	-0.0111868	1	0.00387345	1	-0.0311892	1	1	-0.0128342
Agap3	-0.0142776	1	0.0277105	1	-0.149937	1	1	-0.0455012
Agbl3	-0.0315534	1	0.00277376	1	-0.0829244	1	1	-0.0372347
Agfg1	-0.00416472	1	0.159869	1	0.0291644	1	1	0.0616228
Agfg2	0.00381655	1	-0.00313647	1	-0.08697	1	1	-0.0287633
Aggf1	0.0333306	1	0.00658175	1	0.00749378	1	1	0.0158021
Agk	0.00471085	1	-0.000275699	1	0.0575524	1	1	0.0206625
Agl	-0.0587359	1	0.078548	1	-0.0605324	1	1	-0.0135734
Ago1	0.000413151	1	0.0424393	1	0.0464273	1	1	0.0297599
Ago2	-0.0252077	1	-0.0124325	1	0.0205339	1	1	-0.00570211
Ago3	0.0491626	1	0.0576353	1	0.0178676	1	1	0.0415551
Agpat1	0.0388743	1	0.0771159	1	-0.075207	1	1	0.0135944
Agpat2	0.00028036	1	-0.0757403	1	-0.0489909	1	1	-0.0414836
Agpat3	0.0814174	1	-0.00603553	1	-0.03321	1	1	0.0140573
Agpat4	0.0711518	1	0.0492801	1	-0.0346409	1	1	0.028597
Agpat5	0.182346	1	0.0864164	1	0.145289	1	1	0.138017
Agps	-0.0264673	1	0.0413786	1	0.0559591	1	1	0.0236235
Agrn	-0.0484108	1	-0.0421892	1	-0.125145	1	1	-0.071915
Agtpbp1	-0.0182987	1	-0.0162161	1	0.030816	1	1	-0.00123296
Agtrap	0.000504929	1	0.114467	0.013003	-0.0931509	1	0.192075	0.00727384
Ahctf1	0.0921971	1	0.0703516	1	0.159715	1	1	0.107421
Ahcyl1	0.0436479	1	0.0197396	1	0.0502112	1	1	0.0378662
Ahcyl2	0.0392207	1	0.0079347	1	-0.0195498	1	1	0.00920187
Ahdc1	0.0217593	1	0.0395102	1	-0.00723386	1	1	0.0180119
Ahi1	0.12051	1	0.15284	1	0.205188	1	1	0.159513
Ahnak	-0.27564	1	-0.405086	0.00796352	-0.113621	1	0.139451	-0.264783
Ahnak2	-0.30904	0.434228	-0.208096	1	0.0326535	1	0.947537	-0.161494
Ahr	-0.0561732	1	0.0336334	1	0.0966502	1	1	0.0247035
Ahsa1	0.148207	1	0.0713859	1	-0.0253954	1	1	0.0647325
Ahsa2	0.0746148	1	0.0684744	1	0.141051	1	1	0.0947135
AI314180	0.00385335	1	0.191207	1	0.0755684	1	1	0.0902097
AI413582	0.10119	1	0.199716	1	-0.0206333	1	1	0.0934242
AI467606	0.000418343	1	0.0316579	1	-0.0325521	1	1	-0.000158633
AI597479	0.00936158	1	0.0276391	1	-0.0608092	1	1	-0.00793617
AI837181	-0.0168764	1	-0.0235019	1	-0.0624927	1	1	-0.0342904
Aida	-0.106096	1	-0.055566	1	0.0173524	1	1	-0.0481033
Aifm1	-0.0725147	1	-0.0905112	1	0.0908994	1	1	-0.0240422
Aifm2	-0.00166427	1	-0.0455922	1	0.0864948	1	1	0.0130794
Aig1	-0.0159991	1	0.156769	1	-0.280498	1	1	-0.0465761
Aim2	0.00538012	1	-0.0201155	1	-0.0586796	1	1	-0.0244717
Aimp1	-0.039329	1	0.0923845	1	0.0126806	1	1	0.021912
Aimp2	0.117492	1	0.0183836	1	-0.0717366	1	1	0.0213798
Aip	0.00537986	1	-0.00155019	1	-0.0557933	1	1	-0.0173212
Ajuba	0.0250825	1	0.0274948	1	0.0105781	1	1	0.0210518
Ak2	0.230604	0.12	0.214094	1	0.125681	1	0.644163	0.190126
Ak4	-0.0213986	1	0.0979733	1	-0.0196001	1	1	0.0189916
Ak6	0.0291589	1	-0.0932987	1	-0.0399886	1	1	-0.0347094
Akap1	-0.00864209	1	0.0363726	1	-0.00732863	1	1	0.00680061
Akap10	0.00749139	1	-0.0123366	1	0.0798422	1	1	0.024999
Akap11	0.107898	1	0.0304992	1	0.00699881	1	1	0.0484655
Akap12	0.0844418	1	0.163219	0.0148438	0.286897	1	0.208896	0.178186
Akap13	-0.0710055	1	0.0250937	1	-0.0371252	1	1	-0.027679
Akap7	-0.00160819	1	-0.0235908	1	0.0721361	1	1	0.0156457
Akap8	0.131243	1	-0.000622701	1	-0.0111819	1	1	0.0398127
Akap8l	-0.0108866	1	0.0297355	1	-0.112514	1	1	-0.0312218
Akap9	-0.0593671	1	-0.0700357	1	-0.123327	1	1	-0.0842433
Akip1	-0.0452598	1	-0.0782256	1	0.0340364	1	1	-0.0298163
Akirin1	0.0906222	1	0.0119546	1	-0.00359365	1	1	0.0329944
Akirin2	0.0875999	1	0.0932031	1	0.142753	1	1	0.107852
Akr1a1	0.0826929	1	0.161216	1	-0.166475	1	1	0.0258112
Akr1b10	-0.0351138	1	-0.0314805	1	0.0468781	1	1	-0.00657208
Akr1b3	0.0588989	1	0.158454	1	-0.193075	1	1	0.00809258
Akr1b8	-0.117462	1	-0.123983	1	-0.157464	1	1	-0.13297
Akr1c18	-0.747325	0.000597344	-0.713807	0.00163684	-0.483742	1	0.000108123	-0.648291
Akr1e1	-0.0197002	1	-0.0148119	1	-0.00822165	1	1	-0.0142446
Akr7a5	0.0504558	1	-0.0118691	1	0.094632	1	1	0.0444062
Akt1	-0.106427	1	0.00340382	1	0.0358129	1	1	-0.0224035
Akt1s1	0.130515	1	0.0283402	1	-0.000392203	1	1	0.0528209
Akt2	-0.0659279	1	0.0118947	1	0.151447	1	1	0.0324714
Akt3	-0.00271459	1	-0.0511819	1	0.00255353	1	1	-0.0171143
Aktip	-0.053226	1	0.0195869	1	-0.0404354	1	1	-0.0246915
Alad	0.235991	0.0037364	0.291016	0.00278339	0.0768315	1	0.000814278	0.20128
Alas1	-0.0212546	1	-0.0358613	1	-0.043011	1	1	-0.0333756
Aldh16a1	0.0128888	1	-0.0145016	1	0.0482594	1	1	0.0155489
Aldh18a1	0.0429215	1	0.0540884	1	0.0323066	1	1	0.0431055
Aldh1l2	-0.0233855	1	0.0133821	1	0.0544278	1	1	0.0148081
Aldh2	-0.12075	1	-0.0995513	1	-0.00259628	1	1	-0.0742993
Aldh3a2	0.00170152	1	0.0789309	1	-0.0169998	1	1	0.0212108
Aldh5a1	-0.0561079	1	-0.0191911	1	-0.109072	1	1	-0.061457
Aldh7a1	0.037998	1	-0.0186772	1	0.0639942	1	1	0.0277717
Aldh9a1	0.0176266	1	-0.0245424	1	0.149227	1	1	0.0474372
Aldoa	-0.120859	1	0.0497464	1	0.156758	1	1	0.0285484
Aldoc	0.0185874	1	0.127115	0.098804	0.0340462	1	0.592166	0.0599161
Alg1	0.0440545	1	0.0109181	1	0.0129244	1	1	0.0226323
Alg10b	0.0474305	1	0.0235412	1	-0.076641	1	1	-0.00188978
Alg11	0.050395	1	0.0536069	1	0.0841654	1	1	0.0627224
Alg13	-0.0652514	1	-0.0663537	1	0.110004	1	1	-0.00720041
Alg14	-0.00141335	1	-0.0085494	1	0.0169525	1	1	0.00232993
Alg2	0.0204107	1	0.0237861	1	0.0277371	1	1	0.023978
Alg3	0.0413453	1	-0.0103084	1	-0.047116	1	1	-0.00535968
Alg5	0.0199019	1	0.0341672	1	0.0711591	1	1	0.0417427
Alg6	0.0312022	1	0.029053	1	-0.0337748	1	1	0.00882679
Alg8	-0.00582681	1	0.00346819	1	0.00182331	1	1	-0.000178441
Alkbh1	-0.0993425	1	-0.0890617	1	0.123637	1	1	-0.0215889
Alkbh2	-0.026447	1	0.0231083	1	-0.0228192	1	1	-0.0087193
Alkbh3	0.00662589	1	-0.0233843	1	-0.0674588	1	1	-0.0280724
Alkbh5	0.175651	1	0.175443	1	0.185272	1	1	0.178789
Alkbh6	-0.014639	1	-0.0479518	1	0.0663446	1	1	0.00125127
Alkbh7	0.0757772	1	0.07135	1	0.0381225	1	1	0.0617499
Alkbh8	0.0695961	1	0.0388049	1	-0.128012	1	1	-0.00653704
Alms1	0.00535353	1	-0.023525	1	0.0159083	1	1	-0.000754393
Alyref	0.182804	1	0.152874	1	0.080039	1	1	0.138572
Amd1	0.0973576	1	0.053526	1	0.0474114	1	1	0.0660983
Amd2	-0.0536769	1	0.0225055	1	0.0744525	1	1	0.014427
Amer1	-0.078761	1	-0.0597232	1	-0.0392774	1	1	-0.0592538
Amfr	-0.0143641	1	0.00116522	1	-0.107082	1	1	-0.0400938
Ammecr1	0.0828049	1	-0.0918119	1	0.168841	1	1	0.0532781
Ammecr1l	0.0208737	1	-0.0251871	1	-0.0620373	1	1	-0.0221169
Amn1	-0.0254126	1	-0.0261716	1	0.101193	1	1	0.0165362
Amot	-0.0370919	1	-0.0401031	1	0.0524323	1	1	-0.00825425
Amotl1	0.0430237	1	0.0892457	1	0.0588027	1	1	0.0636907
Amotl2	0.103615	1	0.0292565	1	-0.0779661	1	1	0.0183018
Ampd2	0.018716	1	0.140773	1	0.0104279	1	1	0.0566389
Amz2	0.0385853	1	-0.0129988	1	0.0626583	1	1	0.0294149
Anapc1	0.0349499	1	0.0223451	1	0.184336	1	1	0.0805438
Anapc10	-0.0162756	1	-0.0161341	1	0.110109	1	1	0.0258997
Anapc11	0.0209136	1	0.0867912	1	0.148321	1	1	0.0853419
Anapc13	0.0857323	1	-0.0281978	1	-0.0836139	1	1	-0.00869315
Anapc15	0.0306555	1	0.00713425	1	0.100581	1	1	0.0461237
Anapc16	0.0119219	1	-0.0460874	1	-0.0516792	1	1	-0.0286149
Anapc2	-0.0351495	1	-0.130994	1	0.0315263	1	1	-0.0448725
Anapc4	0.0794881	1	0.00946498	1	0.0587425	1	1	0.0492319
Anapc5	-0.0199507	1	0.0322824	1	0.0654653	1	1	0.0259323
Anapc7	0.0505814	1	0.0192247	1	-0.153644	1	1	-0.0279458
Angel2	0.0591072	1	0.012083	1	0.0471501	1	1	0.0394468
Angpt1	0.0451038	1	0.0528292	1	0.132639	1	1	0.0768573
Angpt2	-0.034101	1	0.0351559	1	-0.0342693	1	1	-0.0110715
Angptl2	0.0211826	1	-0.0296642	1	-0.0465524	1	1	-0.0183446
Angptl4	-0.0710464	1	-0.0474833	1	-0.034024	1	1	-0.0508512
Ank	0.0361537	1	0.296898	0.188612	-0.0268504	1	0.765629	0.102067
Ankfy1	-0.0212103	1	-0.0131255	1	0.0488781	1	1	0.00484742
Ankhd1	0.0202719	1	0.00341496	1	-0.0572741	1	1	-0.0111957
Ankib1	0.0379023	1	0.0167738	1	0.0130475	1	1	0.0225745
Ankle2	0.0115276	1	0.00591784	1	-0.0109078	1	1	0.00217923
Ankmy1	-0.0397113	1	-0.0171422	1	-0.0412951	1	1	-0.0327162
Ankmy2	0.0472317	1	-0.00193492	1	-0.0125219	1	1	0.010925
Ankra2	-0.102703	1	-0.00239124	1	0.0565324	1	1	-0.0161872
Ankrd1	-0.091318	1	-0.140296	1	0.107875	1	1	-0.0412465
Ankrd10	-0.00933095	1	0.0470854	1	0.0766831	1	1	0.0381459
Ankrd11	-0.0305078	1	0.091128	1	0.0924432	1	1	0.0510211
Ankrd12	0.0428866	1	-0.0211406	1	0.108648	1	1	0.0434646
Ankrd13a	-0.0425351	1	0.031301	1	0.0148525	1	1	0.00120613
Ankrd13b	0.0427539	1	-0.0251114	1	-0.0288805	1	1	-0.00374601
Ankrd13c	0.0108429	1	-0.0106236	1	0.0689445	1	1	0.0230546
Ankrd17	0.0800948	1	0.0260033	1	0.218011	1	1	0.108036
Ankrd26	0.0751508	1	0.0417025	1	0.0766445	1	1	0.0644993
Ankrd27	-0.00377239	1	-0.0195038	1	-0.0135427	1	1	-0.012273
Ankrd28	0.0628903	1	-0.00962729	1	-0.0146455	1	1	0.0128725
Ankrd29	0.0486048	1	0.0379844	1	0.0210548	1	1	0.0358813
Ankrd37	0.0397336	1	0.230798	1	0.155954	1	1	0.142162
Ankrd39	0.0815166	1	0.0403498	1	0.0519871	1	1	0.0579512
Ankrd40	-0.089217	1	-0.0592135	1	0.0514686	1	1	-0.0323206
Ankrd44	-0.0208035	1	-0.0208156	1	-0.0109697	1	1	-0.0175296
Ankrd49	-0.0145844	1	-0.0270807	1	0.108856	1	1	0.022397
Ankrd50	0.0336644	1	0.0206448	1	-0.0141282	1	1	0.0133937
Ankrd52	0.0122318	1	-0.0243003	1	0.0689313	1	1	0.0189543
Ankrd54	0.0572974	1	-0.008262	1	0.0617637	1	1	0.036933
Ankrd9	-0.0703236	1	0.0932192	1	0.176264	1	1	0.0663866
Anks1	-0.00907851	1	0.00486945	1	-0.00329448	1	1	-0.00250118
Anks1b	0.0288467	1	0.0982944	1	0.0528018	1	1	0.059981
Anks3	0.00502139	1	0.0436519	1	0.0402523	1	1	0.0296419
Ankzf1	-0.0253725	1	0.0454323	1	0.0213589	1	1	0.0138062
Anln	0.0393386	1	0.000738707	1	-0.129175	1	1	-0.0296992
Ano10	-0.0471189	1	-0.0615309	1	0.0363089	1	1	-0.0241136
Ano6	-0.0167308	1	0.0570106	1	-0.151654	1	1	-0.0371247
Ano8	-0.0336744	1	-0.0157725	1	-0.0418629	1	1	-0.0304366
Anp32a	0.130234	1	-0.0332448	1	-0.00712622	1	1	0.0299542
Anp32b	0.326488	0.000689435	0.407783	3.60495e-07	0.00476796	1	6.65239e-08	0.246346
Anp32e	0.043672	1	0.101708	1	-0.180971	1	1	-0.0118637
Antxr1	-0.00123024	1	-0.0348133	1	0.116804	1	1	0.0269202
Antxr2	0.0213605	1	0.0103347	1	0.0658797	1	1	0.032525
Anxa1	-0.276247	1	-0.278889	1	-0.35197	1	1	-0.302369
Anxa11	0.0448001	1	-0.0221026	1	-0.069977	1	1	-0.0157598
Anxa2	-0.0416946	1	-0.0432197	1	0.11483	1	1	0.00997187
Anxa3	0.0136898	1	0.0519316	1	0.0671487	1	1	0.0442567
Anxa4	-0.205668	1	-0.178097	1	-0.0264473	1	1	-0.136737
Anxa5	-0.330831	0.592572	-0.149172	1	-0.0224914	1	0.983785	-0.167498
Anxa6	-0.155404	1	-0.0217967	1	-0.228294	1	1	-0.135165
Anxa7	0.0573471	1	-0.0279957	1	-0.0254576	1	1	0.00129792
Anxa8	-0.15949	1	-0.191359	1	0.309763	1	1	-0.0136953
Aox1	-0.0423093	1	0.011982	1	-0.0027862	1	1	-0.0110378
Ap1ar	0.0187016	1	-0.0458472	1	-0.0262651	1	1	-0.0178035
Ap1b1	0.0256908	1	-0.00576409	1	-0.023311	1	1	-0.0011281
Ap1g1	0.0524044	1	0.0336129	1	0.188693	1	1	0.0915702
Ap1m1	0.0473725	1	0.0210085	1	0.0196952	1	1	0.0293587
Ap1s1	-0.11743	1	-0.012121	1	-0.0623475	1	1	-0.0639663
Ap1s2	-0.0973233	1	-0.0621157	1	0.0941708	1	1	-0.0217561
Ap2a1	0.0046225	1	-0.0211608	1	0.0111527	1	1	-0.0017952
Ap2a2	0.0629383	1	-0.0226887	1	0.00962647	1	1	0.0166254
Ap2b1	-0.0975633	1	-0.0273574	1	-0.0794115	1	1	-0.0681107
Ap2m1	0.0358973	1	0.0309536	1	0.0169794	1	1	0.0279434
Ap2s1	-0.119836	1	0.0680592	1	-0.0609516	1	1	-0.037576
Ap3b1	-0.0663363	1	-0.0110989	1	-0.0482943	1	1	-0.0419098
Ap3d1	0.0299337	1	0.133054	1	0.0677964	1	1	0.0769281
Ap3m1	0.106376	1	0.0482607	1	-0.0284903	1	1	0.0420488
Ap3s1	-0.194651	1	-0.0654451	1	-0.045059	1	1	-0.101719
Ap3s2	0.0262363	1	-0.0358627	1	0.0100531	1	1	0.000142246
Ap4b1	-0.00483995	1	0.0388078	1	0.0514321	1	1	0.0284666
Ap4m1	-0.0367897	1	-0.0564677	1	0.00273474	1	1	-0.0301742
Ap4s1	0.0669673	1	0.136747	1	0.0223666	1	1	0.0753603
Apaf1	-0.0377674	1	-0.010139	1	-0.0355888	1	1	-0.0278317
Apba3	0.0341595	1	-0.0272281	1	0.0582987	1	1	0.0217434
Apbb1	0.025905	1	0.0225824	1	0.00105574	1	1	0.0165144
Apbb1ip	0.0675123	1	0.155891	1	-0.120202	1	1	0.0344002
Apbb2	-0.161045	1	-0.175698	1	-0.183655	1	1	-0.173466
Apc	0.0460818	1	0.0164597	1	-0.0720359	1	1	-0.00316479
Apeh	0.00179752	1	0.0498789	1	-0.0288022	1	1	0.00762473
Apex1	0.198276	1	0.0249675	1	0.0388961	1	1	0.0873798
Apex2	-0.0421241	1	-0.126046	1	0.101088	1	1	-0.0223609
Aph1a	-0.0624046	1	-0.0136854	1	0.0156843	1	1	-0.0201352
Aph1b	-0.0170615	1	0.0121567	1	0.00620651	1	1	0.000433913
Api5	0.00484533	1	-0.0991344	1	-0.0412807	1	1	-0.0451899
Apip	-0.0745542	1	-0.056475	1	-0.0757212	1	1	-0.0689168
Aplf	0.0588619	1	0.0298137	1	-0.0349027	1	1	0.0179243
Aplp2	-0.0939533	1	-0.282859	1	-0.0600032	1	1	-0.145605
Apmap	0.0305527	1	-0.00535646	1	-0.0842022	1	1	-0.0196686
Apobec3	-0.0361254	1	-0.00389263	1	-0.026111	1	1	-0.022043
Apobr	-0.0630388	1	-0.0737813	1	-0.0500271	1	1	-0.0622824
Apoe	-0.00588197	1	-0.124526	1	-0.151599	1	1	-0.0940022
Apol10b	-0.0741913	1	-0.0668314	1	-0.100891	1	1	-0.080638
Apol9a	0.0235652	1	-0.00735047	1	0.0927255	1	1	0.0363134
Apol9b	0.0138284	1	0.0635537	1	0.101921	1	1	0.0597679
Apoo	-0.118768	1	-0.154235	1	0.0793281	1	1	-0.0645584
Apool	-0.187599	1	-0.248815	0.0439325	0.0409646	1	0.395754	-0.131816
Apopt1	0.0113666	1	0.0369283	1	-0.000390792	1	1	0.015968
App	-0.0466783	1	0.0928453	1	0.15542	1	1	0.0671955
Appbp2	0.0545746	1	-0.0350414	1	0.0767869	1	1	0.0321067
Appl1	0.067724	1	0.0525431	1	0.15561	1	1	0.0919589
Appl2	-0.00386429	1	-8.32406e-05	1	0.0525597	1	1	0.0162041
Aprt	-0.0414726	1	0.173425	1	0.106258	1	1	0.0794033
Aptx	0.00683032	1	-0.00338745	1	-0.00406948	1	1	-0.000208872
Aqp5	0.517474	3.28264e-07	0.328747	0.0233412	-0.0623485	1	1.48865e-06	0.261291
Aqr	0.024588	1	0.0392326	1	0.00196145	1	1	0.0219273
Araf	-0.00814391	1	-0.0600835	1	0.0758134	1	1	0.00252869
Arap1	0.0175361	1	0.0702216	1	0.0433789	1	1	0.0437122
Arcn1	-0.0177881	1	0.00177599	1	0.0707723	1	1	0.0182534
Areg	0.258086	0.0671238	0.289656	0.299383	0.0737185	1	0.252011	0.207153
Arf1	0.0551315	1	0.273534	0.000189535	0.0841376	1	0.00877573	0.137601
Arf2	-0.0263393	1	-0.0113122	1	-0.0262073	1	1	-0.0212863
Arf3	0.0962506	1	0.0677066	1	0.0731856	1	1	0.0790476
Arf4	0.135447	1	0.0154025	1	0.155737	1	1	0.102196
Arf5	-0.144724	1	0.0328502	1	0.0474501	1	1	-0.0214745
Arf6	0.0180664	1	0.162112	1	0.0378368	1	1	0.0726717
Arfgap1	0.0094773	1	0.0219584	1	0.00892519	1	1	0.0134536
Arfgap2	0.016453	1	-0.0260532	1	0.052405	1	1	0.0142683
Arfgap3	-0.0299316	1	0.0229096	1	0.00281454	1	1	-0.00140247
Arfgef1	-0.0518849	1	-0.0216764	1	0.110446	1	1	0.012295
Arfip1	-0.0242095	1	0.00420495	1	0.00818886	1	1	-0.00393857
Arfip2	0.0619774	1	0.13535	0.341754	0.0575003	1	0.905662	0.0849425
Arfrp1	0.0358351	1	-0.0313603	1	-0.119769	1	1	-0.0384315
Arglu1	0.147688	1	-0.0151084	1	0.210004	1	1	0.114195
Arhgap1	0.0174456	1	0.0384928	1	0.0213819	1	1	0.0257734
Arhgap10	0.00635005	1	0.135989	1	0.142624	1	1	0.0949878
Arhgap11a	-0.0180159	1	-0.0219372	1	0.0194553	1	1	-0.00683261
Arhgap12	-0.0711047	1	0.018046	1	0.122577	1	1	0.0231729
Arhgap17	0.0103327	1	-0.0111862	1	0.0910799	1	1	0.0300754
Arhgap18	0.0396707	1	-0.00358515	1	-0.0136376	1	1	0.00748263
Arhgap19	0.0124333	1	-0.0137101	1	0.000900329	1	1	-0.000125493
Arhgap21	0.034784	1	-0.0532198	1	-0.0033149	1	1	-0.00725023
Arhgap22	0.0195921	1	-0.0326129	1	-0.036057	1	1	-0.0163593
Arhgap23	-0.280649	1	-0.229171	1	-0.195868	1	1	-0.235229
Arhgap29	0.127479	0.000229254	0.206902	7.12865e-13	0.18363	1	1.14075e-13	0.17267
Arhgap31	0.049216	1	0.106277	1	-0.0211922	1	1	0.0447671
Arhgap35	0.014418	1	-0.0102883	1	0.0745085	1	1	0.0262127
Arhgap42	0.0589877	1	0.29272	1	0.104875	1	1	0.152194
Arhgap5	0.0529537	1	0.0893624	1	0.0999569	1	1	0.0807577
Arhgdia	0.111708	1	0.133611	1	0.195142	1	1	0.14682
Arhgdib	-0.35948	0.541933	-0.0510182	1	-0.208575	1	0.97562	-0.206358
Arhgef1	0.0297611	1	-0.0236698	1	-0.017765	1	1	-0.00389124
Arhgef10l	-0.00103523	1	0.0143849	1	-0.0115263	1	1	0.00060778
Arhgef11	-0.0168808	1	0.00198619	1	-0.0542243	1	1	-0.0230396
Arhgef12	-0.00478769	1	0.0703767	1	-0.025431	1	1	0.013386
Arhgef17	-0.0159317	1	-0.00838816	1	0.00352426	1	1	-0.00693186
Arhgef18	-0.0141092	1	0.0835897	1	0.012104	1	1	0.0271948
Arhgef2	-0.0694869	1	0.0411804	1	-0.142257	1	1	-0.0568547
Arhgef25	0.00443768	1	0.0357721	1	-0.0139619	1	1	0.00874928
Arhgef28	0.00350721	1	-0.0264521	1	-0.00735601	1	1	-0.0101003
Arhgef40	0.0046905	1	-0.0239949	1	-0.0519295	1	1	-0.0237446
Arhgef5	0.0735634	1	-0.134888	1	-0.138921	1	1	-0.0667483
Arhgef7	0.020241	1	0.0272124	1	-0.0230416	1	1	0.00813725
Arid1a	0.00862657	1	0.0188922	1	-0.113933	1	1	-0.0288047
Arid1b	0.0692768	1	-0.0199636	1	-0.0205557	1	1	0.00958586
Arid2	-0.0308353	1	0.0186428	1	0.0726895	1	1	0.0201657
Arid4a	-0.0952752	1	-0.0236929	1	0.122769	1	1	0.00126685
Arid4b	-0.145183	1	-0.144021	1	0.0721761	1	1	-0.0723428
Arid5a	0.0156027	1	0.104143	1	-0.0508233	1	1	0.022974
Arid5b	-0.251708	1	-0.0412269	1	0.0753501	1	1	-0.0725283
Arih1	0.0281292	1	-0.0319215	1	0.00911463	1	1	0.00177409
Arih2	-0.0314901	1	0.0356296	1	0.0566994	1	1	0.0202796
Arl1	0.00629786	1	0.0806009	1	-0.0582094	1	1	0.00956311
Arl13b	-0.001101	1	0.0229247	1	-0.121036	1	1	-0.0330708
Arl14ep	-0.0408532	1	-0.00293682	1	-0.0841935	1	1	-0.0426612
Arl16	0.0980504	1	0.077398	1	-0.0182929	1	1	0.0523852
Arl2	0.0609304	1	-0.0661698	1	0.0657799	1	1	0.0201801
Arl2bp	-0.00412815	1	0.11688	1	-0.10547	1	1	0.00242733
Arl3	-0.00315528	1	0.0611753	1	-0.00770466	1	1	0.0167718
Arl4a	-0.028748	1	-0.0773088	1	-0.00473446	1	1	-0.0369304
Arl4c	-0.00585425	1	-0.119885	1	0.124355	1	1	-0.000461139
Arl5a	-0.0323667	1	-0.0602538	1	0.0432683	1	1	-0.0164507
Arl5b	0.00278862	1	-0.0357795	1	0.0306445	1	1	-0.000782136
Arl6	0.0424034	1	0.0624761	1	0.0748212	1	1	0.0599002
Arl6ip1	0.120536	1	-0.0845665	1	-0.0116148	1	1	0.00811823
Arl6ip4	0.0547735	1	0.0386763	1	-0.0482918	1	1	0.0150527
Arl6ip5	-0.294084	0.563519	-0.100415	1	-0.16368	1	0.979417	-0.186059
Arl6ip6	0.00538404	1	-0.0303855	1	-0.0737865	1	1	-0.0329293
Arl8a	-0.0972178	1	-0.0846204	1	0.172876	1	1	-0.00298725
Arl8b	0.0464866	1	0.0135011	1	0.0113617	1	1	0.0237831
Armc1	0.0581664	1	0.148542	1	-0.00313787	1	1	0.0678567
Armc10	0.00211178	1	0.0214223	1	0.0305225	1	1	0.0180189
Armc6	0.0403701	1	0.08609	1	-0.0344708	1	1	0.0306631
Armc8	-0.00280032	1	-0.0664748	1	-0.0147198	1	1	-0.0279983
Armc9	-0.0179956	1	0.0388253	1	-0.0341373	1	1	-0.00443587
Armcx5	-0.054168	1	-0.0377855	1	0.0865235	1	1	-0.00180998
Armt1	0.0203017	1	0.0253175	1	-0.0378524	1	1	0.00258893
Arnt	0.011203	1	0.0717394	1	-0.0183548	1	1	0.0215292
Arntl	-0.0240926	1	-0.010885	1	-0.0367182	1	1	-0.0238986
Arpc1a	-0.125049	1	0.014323	1	-0.0475321	1	1	-0.0527528
Arpc1b	-0.192179	1	-0.0712505	1	-0.180966	1	1	-0.148132
Arpc2	-0.0887771	1	0.133709	1	-0.072202	1	1	-0.00909001
Arpc3	-0.0883277	1	-0.0210823	1	-0.0353518	1	1	-0.0482539
Arpc4	0.0472858	1	0.00138664	1	0.0308819	1	1	0.0265181
Arpc5	0.0219134	1	0.147704	1	0.100388	1	1	0.0900016
Arpc5l	-0.000480311	1	-0.0837246	1	0.143344	1	1	0.0197129
Arpin	0.0217229	1	-0.0509685	1	0.0299621	1	1	0.000238838
Arpp19	-0.0824253	1	-0.044604	1	0.0374311	1	1	-0.029866
Arrb2	-0.0125895	1	-0.00390246	1	-0.0216946	1	1	-0.0127289
Arrdc1	0.0281871	1	0.00128682	1	0.0195285	1	1	0.0163341
Arsb	-0.0604061	1	-0.0324426	1	-0.00894924	1	1	-0.0339327
Artn	0.0834056	1	-0.00455227	1	0.0130893	1	1	0.0306476
Arxes2	0.00645965	1	-0.0122974	1	0.0245104	1	1	0.00622419
Asah1	0.0653184	1	0.16622	0.0183354	0.0283074	1	0.238261	0.0866153
Asap1	0.0737981	1	-0.00980427	1	-0.164067	1	1	-0.0333576
Asap2	0.0506726	1	0.149246	1	0.148821	1	1	0.116246
Asb13	0.0097747	1	-0.00594288	1	-0.0143163	1	1	-0.00349483
Asb3	-0.00357534	1	-0.0388253	1	0.0207207	1	1	-0.00722662
Asb6	-0.00673646	1	-0.034603	1	0.047091	1	1	0.00191719
Asb8	0.0127582	1	0.0284389	1	-0.0180198	1	1	0.00772575
Ascc1	-0.00372201	1	0.0166875	1	0.0372191	1	1	0.0167282
Ascc2	0.143311	0.0317756	0.0254521	1	0.00234482	1	0.330373	0.0570359
Ascc3	0.0247219	1	0.0857281	1	0.276198	1	1	0.128883
Asf1a	0.0878206	1	0.0802074	1	0.0555635	1	1	0.0745305
Asf1b	0.110975	1	0.0757019	1	0.0161644	1	1	0.0676138
Ash1l	0.00804991	1	-0.00114127	1	0.103172	1	1	0.0366934
Ash2l	0.241647	0.19665	0.223688	0.289696	0.120136	1	0.454046	0.195157
Asl	0.0549198	1	0.098296	1	0.163303	1	1	0.105506
Asna1	0.0410765	1	0.0741888	1	0.0110773	1	1	0.0421142
Asns	-0.167403	1	-0.0376792	1	0.0766782	1	1	-0.0428013
Asnsd1	0.0977966	1	0.0231319	1	-0.00597176	1	1	0.0383189
Aspa	0.194596	1	0.185694	1	0.045399	1	1	0.141896
Asph	0.00994696	1	0.214094	1	0.0693305	1	1	0.0977905
Aspm	0.0594027	1	-0.0318681	1	-0.106623	1	1	-0.0263627
Aspscr1	0.0535807	1	0.127318	1	0.0994321	1	1	0.0934436
Asxl1	0.0030606	1	0.0131383	1	-0.0624887	1	1	-0.01543
Asxl2	-0.0265209	1	-0.0236307	1	-0.017603	1	1	-0.0225849
Atad1	0.050299	1	-0.0335179	1	0.0800471	1	1	0.0322761
Atad2	0.112446	1	0.0552875	1	0.072107	1	1	0.0799468
Atad2b	-0.0271458	1	0.0169199	1	-0.0432866	1	1	-0.0178375
Atad3a	0.206063	0.461044	0.163128	1	0.214967	1	0.956206	0.194719
Atad5	0.0300025	1	0.0497804	1	0.021528	1	1	0.0337703
Atat1	0.0302738	1	-0.0248534	1	-0.029087	1	1	-0.00788889
Ate1	0.0859513	1	0.0445046	1	0.0503489	1	1	0.0602683
Atf1	-0.0501004	1	0.0433914	1	0.0615307	1	1	0.0182739
Atf2	0.0154234	1	-0.0830305	1	-0.0112731	1	1	-0.0262934
Atf3	-0.0464731	1	-0.217956	1	-0.220723	1	1	-0.161718
Atf4	-0.0119255	1	-0.0538258	1	0.0292595	1	1	-0.0121639
Atf5	-0.321117	1	-0.0841169	1	-0.0905358	1	1	-0.165257
Atf6	-0.14901	1	-0.00547869	1	-0.0327255	1	1	-0.0624046
Atf6b	0.0508764	1	0.0737083	1	-0.02323	1	1	0.0337849
Atf7	-0.0516285	1	-0.0327694	1	-0.0135283	1	1	-0.0326421
Atf7ip	0.0273771	1	-0.00744419	1	-0.0341411	1	1	-0.00473607
Atg10	-0.00177444	1	-0.00552904	1	-0.0469074	1	1	-0.0180703
Atg101	0.0852106	1	0.0403176	1	0.0554605	1	1	0.0603296
Atg12	-0.067798	1	-0.0362973	1	-0.0306516	1	1	-0.0449157
Atg13	0.0192067	1	-0.0331605	1	-0.027933	1	1	-0.0139623
Atg14	0.00774012	1	-0.00869946	1	0.0984197	1	1	0.0324868
Atg16l1	0.0755355	1	0.0660469	1	0.114753	1	1	0.0854453
Atg16l2	-0.0460414	1	0.0332552	1	-0.066551	1	1	-0.0264457
Atg2a	0.062947	1	-0.0469152	1	-0.000938334	1	1	0.00503115
Atg2b	0.0300781	1	0.0085958	1	-0.0261672	1	1	0.0041689
Atg3	0.0644469	1	0.148501	1	-0.109095	1	1	0.0346178
Atg4a	-0.0493679	1	-0.00435032	1	0.00101296	1	1	-0.0175684
Atg4b	0.0257946	1	0.0559744	1	-0.0060273	1	1	0.0252472
Atg4d	-0.0107704	1	0.0571231	1	0.0147998	1	1	0.0203841
Atg5	0.0466833	1	0.105643	1	0.0520851	1	1	0.0681372
Atg7	0.0484259	1	0.0311699	1	-0.00886285	1	1	0.0235777
Atg9a	-0.0291213	1	0.0118782	1	0.00112504	1	1	-0.00537267
Atic	0.0877305	1	0.152978	1	0.146178	1	1	0.128962
Atl2	0.11012	1	0.0226597	1	-0.00569291	1	1	0.0423623
Atl3	-0.0529603	1	-0.0338277	1	0.0840247	1	1	-0.000921084
Atm	0.0459002	1	-0.00235221	1	0.15841	1	1	0.0673193
Atmin	0.0143404	1	-0.0128276	1	0.100266	1	1	0.0339263
Atn1	-0.0740261	1	-0.0522961	1	0.0593821	1	1	-0.0223133
Atox1	-0.183935	1	0.0147612	1	-0.0788787	1	1	-0.0826842
Atp11a	0.0633123	1	0.0510716	1	0.0378862	1	1	0.0507567
Atp11b	-0.0198851	1	-0.0337846	1	0.108392	1	1	0.0182408
Atp11c	-0.00223802	1	-0.0595771	1	0.0482423	1	1	-0.00452427
Atp13a1	0.024076	1	-0.00817895	1	0.0945837	1	1	0.0368269
Atp13a2	0.0520868	1	-0.0111166	1	0.0579001	1	1	0.0329568
Atp13a3	0.032279	1	0.0341304	1	-0.0456404	1	1	0.00692299
Atp1a1	0.0713519	1	0.141333	1	-0.0373378	1	1	0.0584491
Atp1a3	-0.0616321	1	-0.0878662	1	0.0355131	1	1	-0.037995
Atp1b3	0.0340729	1	0.0922726	1	0.271163	1	1	0.132503
Atp23	0.0541115	1	0.00559368	1	0.0119939	1	1	0.0238997
Atp2a2	0.109439	1	0.21821	1	0.0337168	1	1	0.120455
Atp2b1	0.164291	1	0.183162	1	0.201006	1	1	0.18282
Atp2c1	-0.0235738	1	-0.0170562	1	0.0254137	1	1	-0.00507212
Atp5a1	0.171953	0.441476	-0.0125891	1	0.021234	1	0.950009	0.0601994
Atp5b	0.162229	1	0.063776	1	0.118769	1	1	0.114924
Atp5c1	-0.179143	1	-0.115747	1	-0.112693	1	1	-0.135861
Atp5d	0.0177861	1	0.125538	1	0.0259493	1	1	0.0564244
Atp5e	-0.118589	1	-0.0708601	1	-0.107938	1	1	-0.0991289
Atp5f1	-0.0457578	1	0.134579	1	-0.071586	1	1	0.00574501
Atp5g1	-0.0197487	1	-0.0659762	1	-0.0931756	1	1	-0.0596335
Atp5g2	0.0762772	1	0.188616	1	0.00363289	1	1	0.0895087
Atp5g3	0.0232469	1	-0.0489439	1	0.028858	1	1	0.00105363
Atp5h	0.0647856	1	0.111978	1	0.0947766	1	1	0.0905135
Atp5j	-0.0244545	1	0.109303	1	-0.0852676	1	1	-0.000139669
Atp5j2	-0.0941846	1	0.00638357	1	-0.0569224	1	1	-0.0482412
Atp5k	-0.0532302	1	-0.0140357	1	-0.0289425	1	1	-0.0320695
Atp5l	-0.162674	1	-0.0341661	1	-0.0745998	1	1	-0.09048
Atp5o.1	0.151724	1	0.100284	1	0.0529237	1	1	0.101644
Atp5s	0.0278598	1	-0.0298663	1	-0.0697266	1	1	-0.023911
Atp6ap1	-0.0658564	1	-0.039961	1	0.187526	1	1	0.0272363
Atp6ap2	-0.183337	1	-0.0710529	1	0.118551	1	1	-0.0452797
Atp6v0a1	-0.0237142	1	0.0363346	1	0.026042	1	1	0.0128875
Atp6v0a2	0.0092291	1	0.0618213	1	0.0182052	1	1	0.0297519
Atp6v0b	0.191387	1	0.193175	1	0.110066	1	1	0.164876
Atp6v0d1	-0.0390734	1	0.0148121	1	-0.012691	1	1	-0.0123174
Atp6v0e	-0.0523405	1	-0.0492534	1	0.00715311	1	1	-0.0314803
Atp6v1a	-0.0589935	1	0.0520372	1	-0.0561473	1	1	-0.0210345
Atp6v1b2	-0.0127494	1	0.0718982	1	0.101893	1	1	0.0536805
Atp6v1c1	-0.0166327	1	-0.000932088	1	0.0699972	1	1	0.0174775
Atp6v1d	-0.0271422	1	0.0780712	1	-0.0274918	1	1	0.00781239
Atp6v1e1	-0.084209	1	0.0789269	1	0.0225122	1	1	0.00574339
Atp6v1f	-0.0353441	1	-0.00290855	1	0.080554	1	1	0.0141005
Atp6v1g1	-0.0179978	1	0.139599	1	0.130847	1	1	0.0841496
Atp6v1h	-0.0691212	1	0.0497813	1	0.0369323	1	1	0.00586414
Atp7a	-0.0726514	1	-0.0713435	1	0.0804963	1	1	-0.0211662
Atp8b2	0.0146892	1	-0.0143119	1	-0.0237983	1	1	-0.00780703
Atp9a	0.0616356	8.13905e-05	0.132637	2.8509e-12	0.0876738	1	1.58942e-13	0.0939821
Atp9b	0.0124669	1	0.0296705	1	-0.0322281	1	1	0.0033031
Atpaf1	0.0807565	1	0.0748109	1	0.0166968	1	1	0.0574214
Atpaf2	0.105708	1	0.0643745	1	-0.044896	1	1	0.0417287
Atpif1	-0.0899529	1	0.0749214	1	0.0821237	1	1	0.022364
Atr	-0.00645768	1	-0.0109371	1	0.037713	1	1	0.00677273
Atraid	-0.121906	1	0.0495664	1	-0.0784071	1	1	-0.0502488
Atrip	-0.0102143	1	-0.000958136	1	0.0463169	1	1	0.0117148
Atrn	-0.0130991	1	-0.041522	1	-0.0115716	1	1	-0.0220643
Atrx	-0.446544	0.0420386	-0.622431	7.81055e-09	0.158924	1	8.57844e-08	-0.30335
Atxn1	-0.0858307	1	-0.0752666	1	-0.0330722	1	1	-0.0647232
Atxn10	-0.136686	1	0.00266593	1	0.0232603	1	1	-0.03692
Atxn1l	0.0259223	1	-0.0393522	1	-0.0113292	1	1	-0.00825304
Atxn2	-0.00143159	1	-0.00523764	1	0.145558	1	1	0.0462962
Atxn2l	0.0773642	1	0.0580128	1	0.0968238	1	1	0.0774003
Atxn3	0.0353457	1	0.0288335	1	-0.00623453	1	1	0.0193149
Atxn7	0.0510469	1	0.0270884	1	0.0487148	1	1	0.0422833
Atxn7l1	0.00148291	1	-0.0143124	1	-0.019765	1	1	-0.0108648
Atxn7l2	0.0241094	1	-0.00260412	1	0.0211934	1	1	0.0142329
Atxn7l3	-0.049671	1	-0.0919166	1	0.0828424	1	1	-0.0195817
Atxn7l3b	-0.0239203	1	0.0331584	1	0.116739	1	1	0.0419923
AU019823	0.0391491	1	0.0442486	1	0.12161	1	1	0.0683358
AU020206	-0.0251954	1	-0.0567176	1	0.0925363	1	1	0.00354112
AU022252	0.0928967	1	0.0805965	1	-0.00462777	1	1	0.0562885
AU040320	0.132747	0.799818	0.124795	1	0.0905079	1	0.998428	0.116017
Auh	-0.0749245	1	0.0123158	1	-0.00143051	1	1	-0.0213464
Aunip	0.0579571	1	0.0406258	1	0.0776992	1	1	0.0587607
Aup1	0.0218415	1	0.210349	1	-0.157231	1	1	0.0249866
Aurka	0.0414838	1	0.033944	1	-0.0702454	1	1	0.00172743
Aurkaip1	0.283412	0.00204313	0.313817	4.074e-05	0.0575885	1	1.24999e-05	0.218272
Aurkb	0.11475	1	0.117218	1	0.077526	1	1	0.103165
Aven	0.0372072	1	0.0187242	1	0.0767608	1	1	0.0442307
Avl9	-0.0487128	1	-0.03115	1	0.0270094	1	1	-0.0176178
Avpi1	0.0344714	1	0.000391341	1	0.190569	1	1	0.075144
AW209491	0.0113578	1	-0.025654	1	-0.0264456	1	1	-0.0135806
AW549877	0.00422801	1	-0.0524629	1	0.049424	1	1	0.000396373
AW554918	-0.0227339	1	-0.00271635	1	0.0360301	1	1	0.00352662
Axin1	0.0876339	1	0.022032	1	0.162289	1	1	0.0906515
Axin2	-0.0176786	1	0.0339483	1	0.162991	1	1	0.0597537
Axl	0.0537386	1	0.0467844	1	0.000795248	1	1	0.0337727
AY036118	0.0812836	1	-0.124621	1	-0.112939	1	1	-0.0520922
Azi2	0.062185	1	0.081575	1	0.0672086	1	1	0.0703229
Azin1	0.0911858	1	0.0997676	1	0.114865	1	1	0.10194
B230118H07Rik	-0.0634715	1	-0.113915	1	0.0288739	1	1	-0.0495043
B230219D22Rik	-0.171397	1	-0.230905	1	-0.255795	1	1	-0.219366
B230307C23Rik	0.0345615	1	0.0116588	1	-0.0218495	1	1	0.0081236
B230354K17Rik	0.096808	1	-0.00672037	1	0.0892238	1	1	0.0597705
B2m	-0.670725	7.48736e-11	-0.405242	0.00063495	-0.225868	1	2.38761e-11	-0.433945
B3galnt2	-0.0217509	1	-0.0429885	1	0.0184003	1	1	-0.0154464
B3galt6	-0.0500827	1	0.0310048	1	-0.00983233	1	1	-0.00963672
B3gat3	0.125385	1	-0.0157474	1	0.0151679	1	1	0.041602
B3glct	-0.00614912	1	0.0327712	1	-0.0502672	1	1	-0.00788171
B3gnt2	-0.0242966	1	0.0014772	1	-0.0183292	1	1	-0.0137162
B3gnt9	-0.0480586	1	-0.0487757	1	0.0269389	1	1	-0.0232985
B4galnt1	-0.0393371	1	-0.0884524	1	0.0218673	1	1	-0.0353074
B4galt1	0.0680219	1	-0.0601437	1	0.0319133	1	1	0.0132638
B4galt2	0.0261225	1	0.0162637	1	-0.0660155	1	1	-0.00787646
B4galt3	0.0365324	1	0.112467	1	-0.0175817	1	1	0.0438058
B4galt4	0.0370081	1	0.0592468	1	0.0601793	1	1	0.0521447
B4galt5	-0.0648616	1	-0.0341475	1	0.0550146	1	1	-0.0146648
B4galt6	0.0181299	1	-0.0684093	1	-0.038707	1	1	-0.0296621
B4galt7	-0.0639918	1	-0.0443861	1	-0.00313271	1	1	-0.0371702
B4gat1	-0.0425224	1	0.0644486	1	-0.0154757	1	1	0.00215015
B930036N10Rik	-0.0286311	1	-0.02771	1	-0.0312411	1	1	-0.0291941
B9d1	0.0726587	1	0.0972964	1	0.112929	1	1	0.0942947
B9d2	-0.0545762	1	0.00421957	1	0.0648419	1	1	0.00482842
Baalc	-0.0390926	1	0.0594001	1	0.0077688	1	1	0.00935878
Babam1	-0.11282	1	0.0917031	1	-0.12896	1	1	-0.0500257
Babam2	0.0511921	1	0.0546839	1	-0.0524255	1	1	0.0178168
Bace1	0.0519835	1	0.0432841	1	0.104297	1	1	0.0665215
Bach1	-0.0732249	1	-0.0653944	1	-0.014188	1	1	-0.0509358
Bad	0.0543264	1	-0.0858293	1	-0.0614128	1	1	-0.0309719
Bag1	0.0321497	1	0.254559	0.00205073	-0.00695871	1	0.0540262	0.0932501
Bag2	0.141194	1	0.168854	1	0.0729653	1	1	0.127671
Bag3	-0.0491715	1	0.0438943	1	-0.0581513	1	1	-0.0211429
Bag4	0.100447	1	-0.00401469	1	0.0590194	1	1	0.0518171
Bag5	-0.128857	1	-0.0607186	1	-0.0654417	1	1	-0.0850058
Bag6	0.136246	1	0.111517	1	0.0555357	1	1	0.101099
Bahcc1	-0.0147089	1	-0.0145579	1	-0.0277912	1	1	-0.0190193
Baiap2	-0.0120923	1	0.0564806	1	-0.0359913	1	1	0.00279899
Bak1	0.0916172	1	0.0377086	1	0.0780047	1	1	0.0691101
Banf1	0.168778	1	-0.0990519	1	0.0114974	1	1	0.0270745
Banp	-0.00921013	1	0.023561	1	0.0365086	1	1	0.0169532
Bap1	0.0359612	1	0.00994371	1	0.0164892	1	1	0.020798
Bard1	0.0765007	1	0.00281671	1	0.136725	1	1	0.0720141
Bax	-0.0639977	1	-0.212947	1	0.0176038	1	1	-0.0864469
Baz1a	0.0605895	1	0.0685381	1	-0.016478	1	1	0.0375499
Baz1b	0.12585	1	-0.0151888	1	-0.0138604	1	1	0.032267
Baz2a	-0.0107311	1	0.0251317	1	0.0950483	1	1	0.036483
Baz2b	-0.0718397	1	-0.155911	1	0.108763	1	1	-0.0396625
Bbc3	-0.0687856	1	-0.0351992	1	0.125722	1	1	0.00724576
Bbip1	-0.000527559	1	-0.0976558	1	0.0256289	1	1	-0.0241848
Bbs12	-0.015115	1	0.0022194	1	-0.025355	1	1	-0.0127502
Bbs5	-0.00230172	1	-0.00265782	1	-0.0339135	1	1	-0.0129577
Bbs7	-0.00188814	1	0.00579632	1	-0.00726427	1	1	-0.0011187
Bbs9	-0.0340694	1	0.00591841	1	-0.009038	1	1	-0.0123963
Bbx	-0.00979399	1	0.0642172	1	0.102806	1	1	0.0524098
BC003331	-0.00877986	1	0.0565423	1	-0.122575	1	1	-0.0249374
BC003965	0.269725	0.000376547	0.153933	1	0.0252158	1	0.0150494	0.149625
BC004004	0.0271031	1	-0.0522302	1	-0.121591	1	1	-0.048906
BC005537	-0.0733667	1	0.00460861	1	-0.11198	1	1	-0.0602459
BC005561	-0.0059781	1	0.00261874	1	-0.100941	1	1	-0.0347669
BC005624	-0.00936474	1	-0.0673634	1	-0.0782819	1	1	-0.05167
BC017643	0.0390592	1	0.10242	1	0.0243797	1	1	0.0552864
BC022687	0.0297333	1	0.0145152	1	-0.0145341	1	1	0.00990478
BC029722	-0.0210534	1	-0.0464624	1	0.0448942	1	1	-0.00754056
BC031181	-0.062274	1	-0.0215761	1	-0.141163	1	1	-0.0750044
Bcap29	-0.052927	1	0.0536607	1	-0.145325	1	1	-0.0481969
Bcap31	-0.263627	0.425195	-0.163056	1	0.0423574	1	0.944314	-0.128108
Bcar1	0.000568517	1	0.0128523	1	0.00614946	1	1	0.00652343
Bcar3	-0.164458	1	-0.0546257	1	-0.0391245	1	1	-0.0860693
Bcas2	0.0159951	1	-0.00655296	1	-0.0236727	1	1	-0.00474349
Bcas3	-0.00758498	1	0.0513687	1	-0.00911048	1	1	0.0115577
Bcat1	0.051313	1	0.213492	0.00197238	0.0849489	1	0.052516	0.116585
Bcat2	0.0411322	1	0.00794699	1	-0.042065	1	1	0.00233803
Bccip	0.202623	0.230074	0.0923507	1	0.18597	1	0.816499	0.160315
Bcdin3d	0.0279118	1	0.0373537	1	0.054762	1	1	0.0400092
Bckdha	-0.0416428	1	0.0205489	1	0.0579565	1	1	0.0122876
Bckdhb	-0.0465671	1	-0.00475431	1	0.0166961	1	1	-0.0115417
Bckdk	-0.05096	1	0.0539425	1	0.0448089	1	1	0.0159305
Bcl10	0.153997	1	0.183697	1	0.122348	1	1	0.153347
Bcl2	0.0566867	1	-0.0955874	1	0.0193811	1	1	-0.00650655
Bcl2l1	-0.0038903	1	0.0137131	1	0.0210515	1	1	0.0102914
Bcl2l11	-0.0917686	1	-0.0999265	1	-0.0632756	1	1	-0.0849902
Bcl2l12	0.00236987	1	-0.0328544	1	0.00411255	1	1	-0.00879065
Bcl2l13	-0.0392837	1	-0.0235409	1	0.0259057	1	1	-0.0123063
Bcl3	-0.000844012	1	-0.00414492	1	-0.0840813	1	1	-0.0296901
Bcl7a	0.0258732	1	0.00881816	1	0.00120805	1	1	0.0119665
Bcl7b	0.0333217	1	0.0594493	1	-0.0395484	1	1	0.0177409
Bcl7c	-0.0586528	1	0.0118078	1	0.0328101	1	1	-0.00467833
Bcl9	-0.027563	1	-0.00684065	1	0.0597896	1	1	0.00846198
Bcl9l	-0.00715775	1	-0.0626185	1	-0.16343	1	1	-0.0777354
Bclaf1	0.0582758	1	0.0594165	1	0.0390654	1	1	0.0522526
Bclaf3	-0.11617	1	-0.102564	1	0.0820453	1	1	-0.045563
Bcor	-0.017557	1	0.0286151	1	0.0129726	1	1	0.00801024
Bcorl1	-0.0779247	1	-0.0590893	1	-0.0225065	1	1	-0.0531735
Bcr	-0.024948	1	0.0255929	1	0.0165661	1	1	0.00573699
Bcs1l	0.0620165	1	0.00155704	1	0.000495864	1	1	0.0213565
Bdp1	0.0574321	1	-0.0660938	1	2.18842e-06	1	1	-0.00288651
Becn1	-0.0872115	1	-0.0796794	1	0.0856723	1	1	-0.0270729
Bend7	0.0356799	1	0.0146605	1	-0.0428725	1	1	0.0024893
Bet1	-0.0410106	1	0.0344645	1	0.00191258	1	1	-0.0015445
Bet1l	-0.000180257	1	-0.0134038	1	-0.0324879	1	1	-0.0153573
Bex3	-0.129978	1	-0.172592	1	0.171705	1	1	-0.0436217
Bfar	0.0511467	1	0.0121913	1	0.00366812	1	1	0.0223354
Bgn	-0.0290764	1	0.165029	1	-0.0639165	1	1	0.0240119
Bhlhb9	0.0209224	1	-0.0136176	1	-0.0866534	1	1	-0.0264495
Bhlhe40	-0.0755927	1	-0.18777	1	0.0292162	1	1	-0.0780488
Bhlhe41	0.0419215	1	0.0397166	1	-0.00646542	1	1	0.0250576
Bicd1	0.0330319	1	0.0248359	1	0.0992956	1	1	0.0523878
Bicd2	-0.103605	1	-0.136013	1	-0.0576745	1	1	-0.0990976
Bicral	0.0214007	1	0.0295795	1	-0.0246221	1	1	0.00878605
Bid	0.0820154	1	0.0594328	1	-0.0429327	1	1	0.0328385
Bin1	0.0472185	1	0.025466	1	-0.108402	1	1	-0.0119059
Bin3	0.111106	1	0.015939	1	0.0610635	1	1	0.0627027
Birc2	-0.0126572	1	-0.0229645	1	-0.00399473	1	1	-0.0132055
Birc3	-0.0248961	1	-0.0146909	1	-0.0586957	1	1	-0.0327609
Birc5	0.335944	1	0.16405	1	0.0742183	1	1	0.191404
Birc6	0.357111	5.45504e-05	0.127528	1	0.032101	1	0.00321832	0.172247
Bivm	0.0115339	1	0.0275377	1	0.00452891	1	1	0.0145335
Blcap	-0.083849	1	-0.0373603	1	-0.0840032	1	1	-0.0684042
Blm	0.0114122	1	0.0791063	1	0.112266	1	1	0.067595
Blmh	0.301315	9.32106e-07	0.0935242	1	0.0275312	1	0.000103738	0.14079
Blnk	0.128158	4.02875e-06	0.0402824	1	0.000663949	1	0.000364908	0.0563679
Bloc1s1	0.0145299	1	0.0671677	1	-0.0598711	1	1	0.00727553
Bloc1s2	0.101705	1	0.0618931	1	0.028697	1	1	0.0640983
Bloc1s4	-0.046221	1	0.0418065	1	-0.053542	1	1	-0.0193189
Bloc1s5	-0.0507284	1	-0.00352446	1	-0.0328016	1	1	-0.0290182
Bloc1s6	0.0414127	1	-0.0620428	1	-0.0852804	1	1	-0.0353035
Blvra	-0.0326132	1	-0.0528775	1	0.0780373	1	1	-0.00248449
Blvrb	-0.184593	1	-0.17369	1	-0.111535	1	1	-0.156606
Blzf1	-0.0657235	1	-0.0301423	1	-0.0221216	1	1	-0.0393292
Bmi1	-0.017641	1	-0.0444404	1	-0.0327125	1	1	-0.031598
Bmp1	-0.0490563	1	-0.121687	1	-0.0459485	1	1	-0.0722306
Bmp2k	0.0522631	1	0.0828507	1	-0.0272656	1	1	0.0359494
Bmpr1a	0.0342622	1	0.0129649	1	0.0347949	1	1	0.0273407
Bmpr2	-0.0126816	1	0.00906136	1	0.0583059	1	1	0.0182286
Bms1	0.0718524	1	0.074237	1	0.124245	1	1	0.0901116
Bmt2	0.00462234	1	0.0449465	1	-0.00472309	1	1	0.0149486
Bnip1	-0.0519518	1	-0.0551493	1	0.0618111	1	1	-0.0150967
Bnip2	0.0124656	1	-0.134783	1	0.0181388	1	1	-0.0347262
Bnip3	-0.202193	1	-0.114182	1	0.326368	1	1	0.00333116
Bnip3l	0.0706301	1	0.00708064	1	0.295378	1	1	0.124363
Bod1	-0.0472103	1	-0.0640119	1	-0.0257516	1	1	-0.0456579
Bod1l	0.0312076	1	0.0131644	1	0.158267	1	1	0.0675464
Bok	-0.0122834	1	0.327924	1	-0.279001	1	1	0.0122134
Bola1	0.032143	1	0.0296831	1	0.0867806	1	1	0.0495356
Bola2	-0.15272	1	-0.104788	1	-0.00228479	1	1	-0.0865975
Bola3	-0.0601915	1	0.0181368	1	0.0326191	1	1	-0.00314519
Bop1	0.0510416	1	-0.0372977	1	-0.0259827	1	1	-0.00407957
Bora	0.15341	0.0564126	0.0261709	1	-0.00752556	1	0.451755	0.0573516
Borcs5	0.0174015	1	-0.0167787	1	-0.063004	1	1	-0.0207937
Borcs6	0.00696953	1	-0.0453141	1	0.115256	1	1	0.0256372
Borcs7	0.125825	1	0.0303393	1	0.139281	1	1	0.0984817
Borcs8	-0.108088	1	0.114581	1	0.0595954	1	1	0.0220296
Bpgm	-0.487918	1	-0.281988	1	-0.0161361	1	1	-0.262014
Bphl	0.00215869	1	-0.0205645	1	0.100257	1	1	0.0272838
Bpnt1	0.14807	1	0.0978468	1	-0.0347	1	1	0.0704055
Bptf	-0.0777558	1	-0.0859234	1	-0.0959435	1	1	-0.0865409
Braf	-0.0083161	1	0.0340802	1	0.0101724	1	1	0.0119788
Brap	0.0748046	1	-0.0251469	1	0.0667661	1	1	0.0388079
Brca1	0.0121109	1	-0.00112572	1	0.0384112	1	1	0.0164655
Brca2	0.0431446	1	0.00660028	1	-0.0376569	1	1	0.00402934
Brcc3	-0.0340012	1	-0.0649946	1	0.0467434	1	1	-0.0174175
Brd1	-0.0905483	1	-0.081755	1	0.0259319	1	1	-0.0487905
Brd2	0.246408	0.579725	0.0781831	1	-0.101893	1	0.981952	0.0742328
Brd3	-0.0393652	1	-0.0806607	1	-0.0220112	1	1	-0.0473457
Brd4	0.153266	1	0.0930957	1	-0.0256827	1	1	0.0735597
Brd7	-0.0150719	1	0.043088	1	0.0717264	1	1	0.0332475
Brd8	-0.0126911	1	0.0279079	1	-0.0316182	1	1	-0.00546714
Brd9	-0.0475025	1	0.0253121	1	-0.0722407	1	1	-0.0314771
Brf1	-0.0314883	1	0.0272763	1	-0.0119085	1	1	-0.00537351
Brf2	-0.00464124	1	0.0241096	1	0.109495	1	1	0.0429877
Bri3	-0.199607	1	-0.117703	1	-0.0827972	1	1	-0.133369
Bri3bp	0.0531623	1	0.00686127	1	0.0174068	1	1	0.0258101
Brip1	0.0141203	1	0.0246308	1	0.0393563	1	1	0.0260358
Brip1os	-0.0242359	1	-0.0110467	1	0.0291674	1	1	-0.00203841
Brix1	0.153402	1	0.00071345	1	0.161802	1	1	0.105306
Brk1	-0.0479092	1	0.127716	1	0.0248751	1	1	0.0348938
Brms1	0.0730097	1	-0.026198	1	-0.0934568	1	1	-0.0155484
Brms1l	-0.00419109	1	-0.0356182	1	0.13526	1	1	0.031817
Brox	-0.0167052	1	-0.0152867	1	-0.0288729	1	1	-0.0202882
Brpf1	-0.00343975	1	0.0445893	1	-0.134832	1	1	-0.0312276
Brpf3	-0.0303861	1	-0.0171429	1	-0.0488876	1	1	-0.0321389
Brwd1	0.0794455	1	-0.0169652	1	0.0802144	1	1	0.0475649
Brwd3	-0.0694259	1	-0.0908535	1	0.0733027	1	1	-0.0289922
Bscl2	0.0195588	1	0.0438435	1	-0.0127505	1	1	0.0168839
Bsdc1	0.0148592	1	0.0192867	1	0.000503275	1	1	0.0115497
Bsg	-0.0720898	1	0.156013	1	0.230671	1	1	0.104865
Bsn	0.0347375	1	-0.0506973	1	-0.0587939	1	1	-0.0249179
Bst2	-0.523022	1	-0.236947	1	0.205604	1	1	-0.184788
Btaf1	0.00475375	1	-0.0279315	1	0.103991	1	1	0.0269378
Btbd1	-0.0261873	1	0.0327258	1	0.0901399	1	1	0.0322262
Btbd10	-0.0710632	1	-0.0892204	1	-0.0336133	1	1	-0.0646323
Btbd2	0.0231484	1	-0.00922128	1	-0.0460545	1	1	-0.0107091
Btbd3	-0.00271867	1	-0.0306191	1	0.0638877	1	1	0.0101833
Btbd7	-0.0850176	1	-0.072105	1	0.00493751	1	1	-0.0507284
Btbd9	0.022184	1	-0.048062	1	0.0564482	1	1	0.0101901
Btd	0.0371495	1	0.0265689	1	0.0144607	1	1	0.0260597
Btf3	-0.268779	0.00249082	-0.252385	0.00109687	-0.423183	0.00075633	4.56558e-07	-0.314782
Btf3l4	0.0404149	1	0.0645493	1	-0.0376871	1	1	0.0224257
Btg1	-0.0836117	1	-0.090368	1	0.388707	1	1	0.0715759
Btg2	0.000139085	1	-0.0133991	1	0.380782	1	1	0.122507
Btg3	0.049791	1	0.168144	1	-0.0284487	1	1	0.0631621
Btrc	0.0473234	1	0.0166786	1	0.0675082	1	1	0.0438367
Bub1	0.0463426	1	0.0255525	1	0.0138758	1	1	0.0285903
Bub1b	0.0182182	1	-0.0735956	1	0.0931398	1	1	0.0125875
Bub3	0.112989	1	0.111405	1	0.0375859	1	1	0.0873265
Bud13	-0.00593042	1	0.0176775	1	-0.0178087	1	1	-0.00202055
Bud23	0.052945	1	0.0810145	1	-0.155765	1	1	-0.00726859
Bud31	0.0580292	1	0.089079	1	0.0192347	1	1	0.0554476
Bvht	-0.0608761	1	-0.0045001	1	-0.0819254	1	1	-0.0491005
Bysl	0.196018	0.595741	0.0107947	1	0.0145038	1	0.984215	0.0737723
Bzw1	-0.0162476	1	-0.0142238	1	0.000689035	1	1	-0.00992747
Bzw2	0.0409833	1	0.173872	1	0.0112964	1	1	0.075384
C030006K11Rik	0.00453363	1	0.00724884	1	-0.0575808	1	1	-0.0152661
C130013H08Rik	-0.00227789	1	0.0545986	1	-0.107266	1	1	-0.0183152
C130071C03Rik	0.0643487	1	0.0297076	1	-0.0165614	1	1	0.0258316
C1d	-0.0710184	1	0.0274281	1	0.0669	1	1	0.00776987
C1galt1	0.0485576	1	-0.0123638	1	0.0395449	1	1	0.0252462
C1galt1c1	-0.0976228	1	-0.0694017	1	0.0383792	1	1	-0.0428818
C1qa	-0.00499464	1	-0.0334061	1	-0.0883055	1	1	-0.0422354
C1qb	0.00615474	1	-0.0326283	1	-0.103327	1	1	-0.043267
C1qbp	0.10466	1	0.0756149	1	0.0428437	1	1	0.0743728
C1qtnf1	-0.0536227	1	0.00401857	1	-0.0658542	1	1	-0.0384861
C2cd2l	0.0230481	1	0.0361197	1	0.0658731	1	1	0.0416803
C2cd3	0.00257869	1	0.0125072	1	0.00815882	1	1	0.00774825
C330007P06Rik	0.00592276	1	-0.0860206	1	0.00571801	1	1	-0.0247933
C330018D20Rik	0.0271281	1	0.0374432	1	-0.0318725	1	1	0.0108996
C330027C09Rik	0.0309285	1	0.033257	1	-0.0633912	1	1	0.0002648
C730034F03Rik	0.0124719	1	0.0322169	1	0.101444	1	1	0.0487109
C77080	-0.0371661	1	-0.0233379	1	-0.0261968	1	1	-0.0289003
C87436	-0.016238	1	-0.0265282	1	0.0457023	1	1	0.000978711
CAAA01118383.1	0.0864065	1	0.113207	1	-0.0262129	1	1	0.0578002
Caap1	0.0539789	1	0.0637723	1	0.113852	1	1	0.0772012
Cab39	-0.0343309	1	0.0465477	1	-0.110258	1	1	-0.0326805
Cab39l	0.0164206	1	-0.0181994	1	0.0655222	1	1	0.0212478
Cabin1	0.0389381	1	0.0469382	1	0.0710107	1	1	0.0522957
Cables2	-0.0214201	1	-0.0360898	1	0.0408174	1	1	-0.00556415
Cacfd1	0.0364675	1	-0.0313587	1	-0.0366964	1	1	-0.0105292
Cachd1	0.0354833	1	0.0681913	1	-0.0117656	1	1	0.0306363
Cacna1a	0.0601712	1	0.0326992	1	0.111556	1	1	0.0681422
Cacna1c	-0.00333638	1	-0.0221794	1	-0.0200682	1	1	-0.0151946
Cacnb3	-0.0337296	1	-0.0619945	1	-0.00786066	1	1	-0.0345282
Cactin	-0.0261371	1	0.0487735	1	-0.0397393	1	1	-0.00570095
Cacul1	0.0378513	1	-0.00451622	1	-0.0189418	1	1	0.00479775
Cacybp	0.193295	1	0.233261	1	-0.195003	1	1	0.0771844
Cad	0.056891	1	0.163932	1	-0.0835991	1	1	0.0457413
Cadm1	-0.131946	1	-0.106039	1	-0.041421	1	1	-0.0931352
Calcoco1	-0.0176581	1	-0.0157426	1	0.0159428	1	1	-0.00581929
Cald1	-0.102975	1	-0.0300179	1	-0.0854378	1	1	-0.0728101
Calm1	0.0858978	1	0.16971	1	0.113722	1	1	0.12311
Calm2	0.34527	6.8038e-05	0.209392	1	0.0416005	1	0.00385311	0.198754
Calm3	-0.102875	1	0.0166494	1	-0.0605717	1	1	-0.0489325
Calr	0.189811	1	0.363833	0.0031167	-0.0931671	1	0.0730028	0.153492
Calu	-0.0695251	1	0.0232813	1	0.0353642	1	1	-0.00362655
Camk1	-0.0791535	1	-0.0149732	1	-0.0474403	1	1	-0.047189
Camk2d	0.00916224	1	0.0582099	1	-0.0329504	1	1	0.0114739
Camk2g	0.1086	1	0.0513515	1	0.0248561	1	1	0.0616024
Camk2n1	0.335272	0.00813172	0.226517	1	0.0399384	1	0.141407	0.200576
Camkk2	0.0409273	1	-0.0271461	1	-0.0615254	1	1	-0.0159147
Caml	-0.0975678	1	-0.0939427	1	-0.278627	1	1	-0.156713
Camsap1	-0.000457029	1	-0.0934215	1	-0.0541679	1	1	-0.0493488
Camsap2	-0.11041	1	0.00171573	1	0.0498829	1	1	-0.0196038
Camta1	0.0456862	1	0.0335425	1	0.0110471	1	1	0.0300919
Camta2	0.00222393	1	0.0394852	1	-0.00192118	1	1	0.0132626
Cand1	0.0540669	1	0.00551051	1	0.111522	1	1	0.0570333
Cand2	0.0450402	1	0.0271287	1	0.0944935	1	1	0.0555541
Cant1	0.0454494	1	0.0794284	1	-0.0232905	1	1	0.0338625
Canx	0.184059	1	0.179251	1	-0.0557157	1	1	0.102532
Cap1	0.0021642	1	0.229718	0.0543999	-0.0610741	1	0.443332	0.0569359
Capg	-0.298105	1	0.113324	1	-0.0773939	1	1	-0.0873919
Capn1	-0.0530203	1	-0.0401537	1	0.0072056	1	1	-0.0286561
Capn10	-0.00460759	1	0.00232457	1	-0.0354775	1	1	-0.0125869
Capn15	0.0104892	1	-0.061038	1	0.0367263	1	1	-0.00460746
Capn2	0.0452384	1	0.00860238	1	0.0115936	1	1	0.0218115
Capn7	0.00194104	1	-0.0387502	1	0.0117426	1	1	-0.00835553
Capns1	-0.0710733	1	-0.0474101	1	0.0056188	1	1	-0.0376215
Caprin1	-0.0564858	1	-0.0595896	1	0.0920163	1	1	-0.0080197
Capza1	0.0609086	1	0.0939983	1	0.00600747	1	1	0.0536381
Capza2	-0.0742809	1	-0.0380236	1	0.159777	1	1	0.0158243
Capzb	0.11591	1	0.384261	1.34133e-08	0.0230468	1	2.46029e-06	0.174406
Car12	0.0688345	1	0.155342	0.000148767	0.0975011	1	0.00723733	0.107226
Car13	-0.0048633	1	0.0346713	1	0.100307	1	1	0.0433718
Car5b	-0.0777459	1	-0.0635455	1	0.0471281	1	1	-0.0313877
Car9	-0.0573458	1	0.157068	1	0.268494	1	1	0.122739
Card19	-0.202191	1	-0.240617	1	-0.0752789	1	1	-0.172696
Carhsp1	0.0688681	1	0.0013549	1	-0.14067	1	1	-0.0234822
Carm1	0.105965	1	0.0256925	1	-0.0501611	1	1	0.0271654
Carmil1	-0.0235882	1	0.00738148	1	0.0232487	1	1	0.00234733
Carnmt1	0.17681	1	0.0701163	1	-0.117058	1	1	0.0432896
Cars	0.0396212	1	-0.0108109	1	0.0388187	1	1	0.022543
Cars2	0.04515	1	-0.00176169	1	-0.0645489	1	1	-0.00705356
Casc1	-0.0101124	1	-0.0181292	1	0.016545	1	1	-0.00389888
Casc3	-0.0116024	1	-0.0694412	1	0.0444796	1	1	-0.012188
Casc4	0.0217992	1	0.0846368	1	-0.0326728	1	1	0.0245877
Casd1	-0.0165356	1	-0.0234676	1	0.0223765	1	1	-0.00587554
Cask	-0.0518069	1	-0.0641416	1	0.111576	1	1	-0.00145759
Casp1	0.193768	0.0118246	0.485393	2.10488e-09	0.502559	0.298962	2.64094e-09	0.393907
Casp12	0.0539909	1	0.177635	1	0.156913	1	1	0.129513
Casp3	0.0750305	1	0.0787766	1	0.0547099	1	1	0.0695057
Casp4	0.0325554	1	0.0648326	1	0.0139833	1	1	0.0371238
Casp6	-0.103884	1	-0.0888159	1	-0.122008	1	1	-0.104902
Casp8	0.0113279	1	-0.00600978	1	-0.0432868	1	1	-0.0126563
Casp8ap2	0.156062	1	0.0921867	1	0.161872	1	1	0.136707
Casp9	0.0115502	1	0.0231652	1	0.073194	1	1	0.0359698
Cast	-0.151496	1	-0.255461	1	-0.0536802	1	1	-0.153546
Cat	0.00396703	1	-0.0325492	1	-0.0191323	1	1	-0.0159048
Cav1	-0.135124	1	-0.101683	1	-0.0133277	1	1	-0.0833784
Cav2	-0.0422758	1	0.0451195	1	-0.0302988	1	1	-0.00915171
Cavin1	-0.0581903	1	-0.0371592	1	0.0905919	1	1	-0.00158585
Cavin2	0.085393	0.431876	0.0753777	1	0.114032	1	0.946713	0.091601
Cavin3	-0.327689	0.116956	-0.222914	1	-0.135053	1	0.637238	-0.228552
Cavin4	-0.0604944	1	0.0494598	1	0.190135	1	1	0.0597002
Cbfa2t2	-0.00323582	1	-0.0348627	1	-0.0108598	1	1	-0.0163194
Cbfb	-0.00703652	1	0.0319984	1	0.247442	1	1	0.0908012
Cbl	-0.0207959	1	-0.00108785	1	0.11505	1	1	0.0310556
Cblb	-0.0638654	1	-0.0350269	1	-0.0420598	1	1	-0.0469841
Cbll1	0.0469283	1	-0.0583745	1	-0.0359487	1	1	-0.0157983
Cbr1	0.0118951	1	-0.00149073	1	0.142373	1	1	0.0509258
Cbr3	0.0754243	1	0.109656	1	0.0316734	1	1	0.0722514
Cbr4	0.00677476	1	0.0311689	1	-0.0122074	1	1	0.00857872
Cbwd1	0.0297248	1	-0.0690745	1	0.0702562	1	1	0.0103022
Cbx1	-0.107482	1	-0.238986	1	-0.110786	1	1	-0.152418
Cbx3	0.138576	1	0.0311944	1	-0.072894	1	1	0.0322921
Cbx4	-0.00881574	1	0.0142123	1	0.0222878	1	1	0.00922811
Cbx5	0.0689971	1	0.0908447	1	0.131574	1	1	0.0971386
Cbx6	0.0614368	1	-0.0101413	1	0.0252818	1	1	0.0255258
Cby1	0.0118906	1	0.0694405	1	-0.0888374	1	1	-0.0025021
Cc2d1a	0.0311641	1	-0.00707879	1	-0.0557545	1	1	-0.0105564
Cc2d1b	0.130205	0.174853	0.0979015	1	0.122738	1	0.745616	0.116948
Cc2d2a	0.0190696	1	0.0456738	1	-0.0588373	1	1	0.00196871
Ccar1	0.0387094	1	0.086613	1	0.0668665	1	1	0.064063
Ccdc102a	0.028648	1	0.0124367	1	0.00505737	1	1	0.0153807
Ccdc107	0.123072	1	0.120238	1	0.301376	1	1	0.181562
Ccdc112	0.0771288	1	0.00260456	1	0.00729231	1	1	0.0290086
Ccdc115	0.0441844	1	0.107379	1	-0.0485208	1	1	0.0343476
Ccdc12	0.0454936	1	-0.0378521	1	-0.000775331	1	1	0.0022887
Ccdc122	-0.00333844	1	0.0655741	1	0.0638885	1	1	0.0420414
Ccdc124	-0.0684113	1	0.133674	1	-0.0789634	1	1	-0.00456704
Ccdc126	0.0121378	1	-0.0475066	1	0.0079452	1	1	-0.00914121
Ccdc127	-0.0223273	1	0.00306789	1	-0.156177	1	1	-0.0584788
Ccdc130	-0.0300955	1	0.0436865	1	-0.054954	1	1	-0.0137877
Ccdc137	0.0318265	1	0.0921211	1	-0.0524066	1	1	0.023847
Ccdc15	-0.0367799	1	-0.00555374	1	0.0756022	1	1	0.0110895
Ccdc163	-0.0258327	1	0.100975	1	0.0103696	1	1	0.0285039
Ccdc167	0.0714844	1	0.0640954	1	-0.0246737	1	1	0.0369687
Ccdc174	0.0292449	1	0.111601	1	0.14137	1	1	0.0940719
Ccdc18	-0.0988165	1	-0.0785016	1	-0.07488	1	1	-0.084066
Ccdc181	0.0441887	1	0.00135002	1	0.040579	1	1	0.0287059
Ccdc186	0.00685782	1	-0.021973	1	-0.0902518	1	1	-0.0351223
Ccdc191	0.00954224	1	-0.0104199	1	0.0620187	1	1	0.0203803
Ccdc22	-0.0295164	1	-0.0460758	1	0.039164	1	1	-0.0121427
Ccdc25	0.230011	0.0713204	0.134995	1	0.0105373	1	0.508292	0.125181
Ccdc28a	0.0398948	1	0.0281712	1	-0.0877587	1	1	-0.00656426
Ccdc32	-0.0220655	1	0.0102713	1	-0.081067	1	1	-0.0309537
Ccdc34	-0.120228	1	-0.208755	1	-0.0524086	1	1	-0.127131
Ccdc43	0.0383405	1	-0.0156494	1	0.123824	1	1	0.0488385
Ccdc47	0.0975169	1	0.0987777	1	0.044522	1	1	0.0802722
Ccdc50	0.0475975	1	-0.0644442	1	0.0474042	1	1	0.0101858
Ccdc51	0.0147716	1	0.046131	1	0.0211565	1	1	0.0273531
Ccdc58	0.0338843	1	-0.0173645	1	-0.119852	1	1	-0.0344439
Ccdc59	-0.0564577	1	0.0441392	1	0.229626	1	1	0.0724358
Ccdc6	0.0020732	1	-0.0224592	1	0.10659	1	1	0.0287345
Ccdc61	0.0273341	1	-0.00865122	1	0.0204324	1	1	0.0130384
Ccdc66	0.0958959	1	-0.0306546	1	-0.0416333	1	1	0.00786933
Ccdc68	-0.10507	1	-0.150796	1	-0.0736808	1	1	-0.109849
Ccdc71	0.0107293	1	-0.0020088	1	-0.0228665	1	1	-0.00471535
Ccdc71l	-0.0466749	1	-0.00440452	1	-0.0647583	1	1	-0.0386126
Ccdc77	0.0218375	1	-0.00172152	1	0.0358484	1	1	0.0186548
Ccdc82	-0.00084954	1	-0.129268	1	0.0254074	1	1	-0.0349033
Ccdc85b	0.0718791	1	-0.00585984	1	0.0444174	1	1	0.0368122
Ccdc86	0.0676844	1	0.0465613	1	0.072758	1	1	0.0623346
Ccdc88a	-0.0516146	1	-0.137021	1	-0.0704202	1	1	-0.0863519
Ccdc9	0.0194549	1	-0.00275352	1	-0.0815706	1	1	-0.0216231
Ccdc90b	-0.0137315	1	-0.000643429	1	0.0446917	1	1	0.0101056
Ccdc91	0.0341109	1	0.0185907	1	0.142109	1	1	0.0649369
Ccdc93	0.0568398	1	0.0546244	1	-0.0618941	1	1	0.0165234
Ccdc94	0.0644339	0.925757	0.0199546	1	0.0591712	1	0.999928	0.0478532
Ccdc97	0.0259018	1	0.00740746	1	-0.00396986	1	1	0.00977981
Cchcr1	0.0290454	1	0.016079	1	0.0145638	1	1	0.0198961
Ccl25	0.0491822	1	0.0252521	1	0.0209412	1	1	0.0317918
Ccm2	-0.0125827	1	-0.0523266	1	0.00781169	1	1	-0.0190325
Ccna2	0.298225	1	0.111262	1	-0.16254	1	1	0.0823153
Ccnb1	0.0300195	1	-0.0648428	1	-0.18262	1	1	-0.0724811
Ccnb2	0.056907	1	-0.00954964	1	-0.0682576	1	1	-0.00696676
Ccnc	0.099924	1	0.00318459	1	-0.031644	1	1	0.0238215
Ccnd1	0.316187	0.319011	0.109559	1	-0.0788328	1	0.891705	0.115638
Ccnd2	0.136232	1	0.0808226	1	0.465098	1	1	0.227384
Ccnd3	0.224179	0.324602	0.271307	0.00679921	0.00700464	1	0.0569846	0.167497
Ccndbp1	-0.0607216	1	-0.0425116	1	0.0635154	1	1	-0.0132393
Ccne1	0.0154472	1	0.0574951	1	0.0977684	1	1	0.0569036
Ccne2	0.0677767	1	0.0969861	1	0.0845571	1	1	0.0831066
Ccnf	0.0675386	1	0.0267785	1	0.0066428	1	1	0.0336533
Ccng1	-0.0305973	1	-0.0122553	1	-0.0275804	1	1	-0.0234777
Ccng2	-0.0929175	1	0.0725158	1	0.0454897	1	1	0.00836267
Ccnh	-0.0850071	1	-0.0971995	1	-0.103831	1	1	-0.095346
Ccni	-0.104304	1	-0.0481513	1	-0.0265271	1	1	-0.0596609
Ccnk	-0.00833199	1	0.0237641	1	-0.00166169	1	1	0.00459014
Ccnl1	-0.0524001	1	-0.0306883	1	-0.00140652	1	1	-0.028165
Ccnl2	0.0379974	1	0.0543288	1	0.0274197	1	1	0.0399153
Ccnt1	-0.0230779	1	-0.0371807	1	-0.107565	1	1	-0.0559413
Ccnt2	0.00708444	1	0.117025	1	0.0813276	1	1	0.068479
Ccny	0.0304202	1	-0.0495462	1	-0.0284367	1	1	-0.0158542
Ccnyl1	-0.00942488	1	0.0178936	1	-0.00847097	1	1	-7.52295e-07
Ccp110	0.0173984	1	-0.00768281	1	-0.0125504	1	1	-0.000944943
Ccs	-0.0423137	1	-0.144091	1	-0.0389011	1	1	-0.0751018
Ccsap	0.042663	1	-0.0831678	1	-9.73048e-05	1	1	-0.013534
Ccser2	-0.00276842	1	-0.014225	1	0.019227	1	1	0.000744542
Cct2	0.147134	1	0.125481	1	-0.0123575	1	1	0.0867527
Cct3	0.234329	0.00387283	0.169091	1	0.0297361	1	0.0851092	0.144386
Cct4	-0.0829473	1	-0.11086	1	-0.0645262	1	1	-0.0861111
Cct5	0.168056	1	0.0690729	1	-0.0604243	1	1	0.0589014
Cct7	0.0649157	1	0.0423271	1	0.0229557	1	1	0.0433995
Cct8	0.0778262	1	0.167877	1	-0.126206	1	1	0.0398325
Ccz1	0.0367933	1	-0.0634211	1	0.00965286	1	1	-0.0056583
Cd109	-0.0156651	1	0.012782	1	-0.175408	1	1	-0.0594303
Cd14	-0.0513344	1	-0.0399531	1	-0.0983808	1	1	-0.0632228
Cd151	0.118691	1	0.097684	1	-0.107862	1	1	0.0361711
Cd164	0.082211	1	0.0257407	1	-0.00450989	1	1	0.0344806
Cd248	0.0270671	1	0.128973	1	-0.0202761	1	1	0.0452546
Cd24a	-0.0402464	1	-0.133212	1	-0.172898	1	1	-0.115452
Cd274	-0.0119241	1	-0.0216966	1	0.0995199	1	1	0.0219664
Cd2ap	0.234735	0.103583	0.128164	1	0.0383885	1	0.604705	0.133763
Cd2bp2	0.0156215	1	-0.0360421	1	0.0706239	1	1	0.0167345
Cd320	0.170528	1	-0.0687859	1	0.075043	1	1	0.0589283
Cd3eap	0.0226359	1	0.0113161	1	0.0910095	1	1	0.0416538
Cd44	0.0629139	1	-0.122716	1	-0.0182508	1	1	-0.0260175
Cd47	-0.200133	1	-0.145474	1	-0.0816298	1	1	-0.142412
Cd63	0.0162019	1	0.220165	1	0.0194703	1	1	0.0852791
Cd74	-0.0197692	1	-0.0386128	1	-0.146288	1	1	-0.0682234
Cd81	0.24453	0.0718949	0.275536	0.000719368	0.183994	1	0.00308115	0.234687
Cd9	-0.196064	1	0.0810261	1	-0.144888	1	1	-0.0866421
Cd99l2	-0.0508421	1	0.0569795	1	0.0567527	1	1	0.0209633
Cda	0.0233625	1	-0.224617	0.580764	0.132579	1	0.982106	-0.022892
Cdadc1	0.0505544	1	0.00744673	1	-0.0375061	1	1	0.00683168
Cdc123	-0.0307407	1	-0.105413	1	-0.0562657	1	1	-0.06414
Cdc14a	-0.0194535	1	0.0317188	1	0.0374594	1	1	0.0165749
Cdc14b	-0.057367	1	-0.0309825	1	0.0383267	1	1	-0.0166743
Cdc16	0.258175	5.09713e-05	0.18486	1	0.103541	1	0.00304469	0.182192
Cdc20	0.250824	1	0.185859	1	-0.0682087	1	1	0.122825
Cdc23	0.0111591	1	0.0123742	1	0.0317501	1	1	0.0184278
Cdc25a	0.0123445	1	-0.0225915	1	0.0338084	1	1	0.00785381
Cdc25b	-0.00980255	1	-0.034116	1	0.0364723	1	1	-0.00248209
Cdc25c	0.0121516	1	-0.0257472	1	-0.0631406	1	1	-0.0255787
Cdc26	0.115984	1	0.172229	0.744427	0.126216	1	0.99656	0.138143
Cdc27	0.0245232	1	-0.0431776	1	0.0155589	1	1	-0.00103184
Cdc34	-0.084532	1	0.0251758	1	0.146772	1	1	0.0291386
Cdc37	-0.10042	1	-0.0689861	1	-0.184815	1	1	-0.118074
Cdc37l1	0.016588	1	-0.0134184	1	0.0165094	1	1	0.00655968
Cdc40	0.0293058	1	-0.0362694	1	0.0486379	1	1	0.0138914
Cdc42	0.0117425	1	0.115291	1	0.0383124	1	1	0.0551153
Cdc42bpa	-0.0948692	1	-0.0958322	1	0.113548	1	1	-0.0257178
Cdc42bpb	-0.103832	1	0.054753	1	0.0676068	1	1	0.00617604
Cdc42ep1	0.079087	1	0.00483081	1	-0.0463616	1	1	0.0125187
Cdc42ep2	-0.0267272	1	0.113414	1	-0.0814803	1	1	0.00173533
Cdc42ep3	0.0655666	1	0.0115167	1	0.0174069	1	1	0.0314967
Cdc42ep4	-0.000124721	1	0.0139851	1	-0.0457555	1	1	-0.0106317
Cdc42se1	-0.0411229	1	-0.151723	1	-0.00666191	1	1	-0.0665027
Cdc42se2	0.00508967	1	-0.014717	1	0.0556943	1	1	0.0153557
Cdc45	0.131989	1	0.0374827	1	0.0546051	1	1	0.0746921
Cdc5l	0.270711	0.00710467	0.156749	1	-0.0478926	1	0.129187	0.126522
Cdc6	0.0448226	1	-0.00122048	1	0.0149955	1	1	0.0195325
Cdc7	0.0031522	1	0.0194942	1	0.0699198	1	1	0.0308554
Cdc73	0.120652	1	0.0508635	1	0.155434	1	1	0.108983
Cdca2	0.141549	1	0.054689	1	0.027006	1	1	0.0744146
Cdca3	0.121059	1	0.0101632	1	-0.0362379	1	1	0.0316614
Cdca4	0.0358081	1	0.138476	1	0.158045	1	1	0.110776
Cdca5	0.0187518	1	-0.02121	1	0.129231	1	1	0.0422577
Cdca7	0.0971276	1	-0.0339814	1	-0.114438	1	1	-0.0170971
Cdca7l	0.0506789	1	0.0526768	1	0.000165665	1	1	0.0345071
Cdca8	0.317467	1	0.303781	1	0.0495157	1	1	0.223588
Cdh15	-0.0549685	1	0.130223	1	0.0976694	1	1	0.0576411
Cdip1	-0.0024358	1	0.0610068	1	0.129992	1	1	0.0628542
Cdipt	-0.00775624	1	0.0561534	1	0.0452147	1	1	0.031204
Cdk1	0.235167	1	0.22674	1	0.19516	1	1	0.219022
Cdk10	0.0108124	1	-0.00672001	1	0.0435859	1	1	0.0158928
Cdk11b	0.103153	1	0.170751	1	-0.0803393	1	1	0.0645216
Cdk12	-0.0847404	1	-0.106477	1	-0.0440182	1	1	-0.078412
Cdk13	-0.0728658	1	-0.09849	1	-0.0586999	1	1	-0.0766853
Cdk14	0.104858	1	-0.00693478	1	-0.109081	1	1	-0.00371898
Cdk16	-0.0688817	1	-0.0983169	1	0.0120376	1	1	-0.0517203
Cdk17	0.0354509	1	0.0146849	1	-0.0435699	1	1	0.00218865
Cdk18	0.179742	0.336033	0.0477284	1	-0.0197917	1	0.902313	0.0692264
Cdk19	-0.00721682	1	-0.0010002	1	-0.0317051	1	1	-0.0133074
Cdk2	-0.00457514	1	-0.0225109	1	0.0190512	1	1	-0.00267827
Cdk2ap1	-0.0361852	1	0.0393447	1	-0.115205	1	1	-0.0373486
Cdk2ap2	0.281318	0.533312	0.342676	0.00813374	0.0085713	1	0.0921322	0.210855
Cdk4	-0.0228382	1	-0.00740325	1	0.0490143	1	1	0.00625762
Cdk5	0.061394	1	-0.0281111	1	0.0614809	1	1	0.0315879
Cdk5rap2	0.161765	1	0.109409	1	0.030608	1	1	0.100594
Cdk5rap3	-0.0395391	1	-0.0791599	1	0.0593987	1	1	-0.0197668
Cdk6	0.0398797	1	-0.0261254	1	-0.124648	1	1	-0.0369646
Cdk7	0.0343832	1	0.0304434	1	-0.0335226	1	1	0.0104347
Cdk8	0.0347294	1	-0.0655416	1	-0.149193	1	1	-0.0600016
Cdk9	0.0687686	1	0.0319485	1	0.135269	1	1	0.0786619
Cdkal1	0.0244339	1	-0.00587373	1	-0.00373032	1	1	0.00494327
Cdkl2	-0.0369196	1	-0.0389985	1	0.0216439	1	1	-0.0180914
Cdkl5	-0.0226873	1	-0.0108717	1	0.0265332	1	1	-0.00234193
Cdkn1a	-0.312779	1	0.194619	1	0.379769	1	1	0.0872029
Cdkn1b	0.0474748	1	0.0148454	1	-0.0708628	1	1	-0.00284752
Cdkn2a	0.0562404	1	0.297723	0.000266584	0.112129	1	0.0114884	0.155364
Cdkn2aip	0.0338565	1	0.0381408	1	0.00333111	1	1	0.0251095
Cdkn2aipnl	0.0219557	1	0.0650688	1	-0.12754	1	1	-0.0135053
Cdkn2b	0.0420101	1	-0.0232885	1	-0.0963783	1	1	-0.0258855
Cdkn2c	0.208332	0.370437	0.166434	0.0852617	-0.0481252	1	0.329231	0.10888
Cdkn2d	0.0954828	1	0.0930183	1	0.0170518	1	1	0.0685176
Cdkn3	0.0273496	1	0.0389566	1	-0.015387	1	1	0.0169731
Cdpf1	0.0118298	1	-0.0142544	1	0.0735141	1	1	0.0236965
Cdr2	-0.0010975	1	0.0294352	1	-0.0869594	1	1	-0.0195406
Cdr2l	-0.0659002	1	0.0382837	1	-0.0893916	1	1	-0.0390027
Cds2	-0.00490883	1	-0.0137549	1	-0.0090265	1	1	-0.00923008
Cdt1	0.000464985	1	0.0641654	1	-0.0930308	1	1	-0.00946678
Cdv3	0.135255	1	0.00836778	1	0.0225909	1	1	0.0554045
Cdyl	-0.0621043	1	-0.076914	1	-0.019955	1	1	-0.0529911
Cebpb	-0.424932	1	-0.535072	0.298465	-0.197399	1	0.877507	-0.385801
Cebpd	-0.0541753	1	0.00221341	1	-0.0802406	1	1	-0.0440675
Cebpg	0.00165235	1	0.0885576	1	0.0823133	1	1	0.0575077
Cebpz	0.365997	2.03498e-06	0.146602	1	0.0352408	1	0.000203449	0.182613
Cebpzos	0.125621	1	0.0240538	1	-0.0325361	1	1	0.0390463
Celf1	0.0197623	1	-0.0282095	1	0.0692692	1	1	0.020274
Celf2	0.0291997	1	-0.0139857	1	-0.0452409	1	1	-0.010009
Celf4	-0.0924888	1	-0.0474477	1	-0.049992	1	1	-0.0633095
Cenpa	0.139301	1	0.102518	1	-0.235335	1	1	0.0021612
Cenpb	-0.139651	1	-0.115453	1	0.160276	1	1	-0.0316096
Cenpc1	0.0636686	1	-0.00594452	1	-0.0504986	1	1	0.0024085
Cenpe	0.228989	1	0.177252	1	-0.107873	1	1	0.0994561
Cenpf	0.203702	1	0.0245609	1	-0.147144	1	1	0.0270398
Cenph	0.0061397	1	-0.0248317	1	0.0377227	1	1	0.00634354
Cenpi	0.00509177	1	-0.0216719	1	0.0519744	1	1	0.0117981
Cenpk	0.0219947	1	-0.0340975	1	0.0393175	1	1	0.00907158
Cenpl	0.0400474	1	0.045667	1	0.0466883	1	1	0.0441342
Cenpm	-0.0485992	1	0.00844324	1	0.042994	1	1	0.000946024
Cenpn	0.0715805	1	0.040937	1	0.0238112	1	1	0.0454429
Cenpo	0.009495	1	0.0355905	1	0.0622969	1	1	0.0357942
Cenpp	-0.0292877	1	-0.0405829	1	-0.0631951	1	1	-0.0443552
Cenpq	0.0817571	1	0.097272	1	0.0140517	1	1	0.0643603
Cenps	0.0438507	1	0.0192182	1	0.0162756	1	1	0.0264482
Cenpt	0.0471775	1	0.0817611	1	-0.0285754	1	1	0.0334544
Cenpu	0.0332835	1	0.00370486	1	0.00751193	1	1	0.0148334
Cenpv	0.0395224	1	-0.210275	1	0.119639	1	1	-0.0170378
Cenpw	0.0427571	1	-0.0296992	1	0.138754	1	1	0.0506041
Cenpx	0.129421	1	0.206408	1	-0.0943743	1	1	0.0804847
Cep104	0.0275156	1	-0.0130144	1	-0.00182677	1	1	0.0042248
Cep112	-0.0314429	1	0.0195238	1	-0.0136416	1	1	-0.00852021
Cep120	-0.0040145	1	0.00071107	1	0.0137006	1	1	0.00346572
Cep131	-0.00202071	1	-0.0100691	1	-0.0110222	1	1	-0.007704
Cep135	-0.00688451	1	-0.0302803	1	-0.0646513	1	1	-0.0339387
Cep152	0.00473446	1	0.040746	1	0.078003	1	1	0.0411611
Cep162	0.090782	1	0.0394057	1	0.0243474	1	1	0.0515117
Cep164	0.00668774	1	0.0781867	1	0.0454539	1	1	0.0434428
Cep170	-0.045314	1	0.0719013	1	-0.0963547	1	1	-0.0232558
Cep170b	-0.0634546	1	-0.00842699	1	-0.037787	1	1	-0.0365562
Cep19	0.0214668	1	-0.0296672	1	0.0930004	1	1	0.0282667
Cep192	-0.0203977	1	0.00619263	1	-0.052678	1	1	-0.0222943
Cep250	-0.0575532	1	-0.0621385	1	0.0122126	1	1	-0.0358264
Cep290	0.0360838	1	0.102492	1	0.0317495	1	1	0.0567751
Cep295	0.0206686	1	0.0156983	1	-0.023779	1	1	0.00419595
Cep350	-0.0690995	1	-0.0069983	1	0.0659064	1	1	-0.00339716
Cep41	-0.0241805	1	0.061857	1	-0.00904185	1	1	0.00954491
Cep44	0.0382421	1	0.0640224	1	0.0814663	1	1	0.0612436
Cep55	0.0940353	1	0.0394192	1	-0.110531	1	1	0.0076411
Cep57	0.15174	1	0.0704624	1	-0.00162494	1	1	0.0735259
Cep57l1	-0.00304115	1	0.0109917	1	-0.0357853	1	1	-0.00927825
Cep63	0.0343408	1	0.0153615	1	0.0266811	1	1	0.0254611
Cep68	0.0316949	1	-0.0334988	1	-0.000360796	1	1	-0.00072155
Cep70	0.00536783	1	0.00649279	1	-0.0352604	1	1	-0.00779993
Cep78	0.0143624	1	-0.0283344	1	-0.0260907	1	1	-0.0133542
Cep83	0.0260283	1	-0.0302391	1	0.113976	1	1	0.0365883
Cep85	0.0066341	1	0.0301079	1	0.0287867	1	1	0.0218429
Cep89	0.0684141	1	-0.000482796	1	-0.0805586	1	1	-0.00420909
Cep95	-0.00989957	1	0.020834	1	0.0530263	1	1	0.0213203
Cept1	0.0167306	1	-0.0364099	1	-0.0504316	1	1	-0.0233703
Cers2	0.00262136	1	0.203934	1	-0.0427547	1	1	0.0546004
Cers5	0.0212375	1	0.0423208	1	0.0595445	1	1	0.0410343
Cers6	-0.0186907	1	-0.0296048	1	-0.0180078	1	1	-0.0221011
Cetn2	-0.233818	1	-0.140305	1	0.0349244	1	1	-0.113066
Cetn3	-0.139899	1	-0.132409	1	-0.160121	1	1	-0.144143
Cetn4	-0.0263018	1	0.0241907	1	0.0486745	1	1	0.0155211
Cfap20	0.0798659	1	0.0827894	1	0.129888	1	1	0.0975145
Cfap36	-0.0407183	1	0.00197835	1	-0.00668496	1	1	-0.0151417
Cfap43	-0.0349988	1	-0.0601134	1	-0.019268	1	1	-0.0381268
Cfap97	0.020497	1	0.047087	1	0.0542231	1	1	0.0406024
Cfdp1	0.0149604	1	0.0351628	1	-0.102025	1	1	-0.0173005
Cfl1	0.00306896	1	-0.0862684	1	0.0223688	1	1	-0.0202769
Cfl2	0.0230001	1	0.00117408	1	0.121467	1	1	0.0485472
Cflar	-0.0239777	1	-0.0266667	1	-0.0385912	1	1	-0.0297452
Cggbp1	-0.053606	1	0.0383488	1	-0.0771727	1	1	-0.03081
Cgref1	-0.066788	1	0.0408531	1	0.0451669	1	1	0.00641068
Cgrrf1	0.0632267	1	0.0299308	1	-0.0587665	1	1	0.0114637
Chac1	-0.0108838	1	0.0163912	1	-0.0354365	1	1	-0.00997639
Chac2	-0.0371156	1	-0.0119031	1	-0.0322087	1	1	-0.0270758
Chaf1a	0.149053	1	0.111722	1	0.114785	1	1	0.125187
Chaf1b	0.128043	1	0.197361	1	0.176146	1	1	0.167184
Champ1	0.0156355	1	0.0156207	1	0.0635499	1	1	0.031602
Chchd1	0.149409	1	-0.000124118	1	-0.0154169	1	1	0.0446226
Chchd10	0.162721	0.00132128	0.36844	9.97477e-11	-0.000246161	1	6.20016e-11	0.176972
Chchd2	0.0642259	1	0.0388858	1	-0.0442824	1	1	0.0196098
Chchd3	0.116624	1	0.0455595	1	0.137559	1	1	0.0999142
Chchd4	0.0203503	1	-0.024093	1	-0.0357344	1	1	-0.013159
Chchd5	-0.0687388	1	-0.106368	1	0.0565032	1	1	-0.0395346
Chchd6	-0.165878	1	-0.0701313	1	-0.0453584	1	1	-0.0937891
Chchd7	0.144135	1	0.269317	0.00832299	0.0360318	1	0.143611	0.149828
Chd1	0.118879	1	0.0396912	1	0.0302164	1	1	0.0629288
Chd1l	0.102458	1	0.0990123	1	0.0449037	1	1	0.0821247
Chd2	-0.0401311	1	-0.0936145	1	0.0257627	1	1	-0.0359943
Chd3	-0.238455	1	-0.108788	1	-0.0318812	1	1	-0.126375
Chd4	0.0290893	1	0.0368185	1	-0.0337117	1	1	0.010732
Chd6	-0.0222481	1	-0.0885766	1	-0.108263	1	1	-0.0730294
Chd7	-0.0597173	1	-0.099827	1	-0.0470172	1	1	-0.0688539
Chd8	0.043487	1	-0.00570882	1	0.0492295	1	1	0.0290026
Chd9	-0.0202809	1	0.0767078	1	0.122297	1	1	0.0595745
Chek1	0.00701967	1	0.00185355	1	-0.0538409	1	1	-0.0149892
Chek2	0.00328524	1	-0.000966334	1	-0.0182322	1	1	-0.00530444
Cherp	-0.0293447	1	0.0284015	1	0.104169	1	1	0.0344086
Chfr	-0.00969536	1	-0.0112768	1	-0.00189842	1	1	-0.00762354
Chic1	-0.00431636	1	-0.0209164	1	0.167086	1	1	0.0472844
Chic2	-0.0967633	1	0.000502623	1	0.0574097	1	1	-0.0129504
Chid1	0.0122395	1	0.0100178	1	0.0133455	1	1	0.0118676
Chka	0.157104	1	0.00542235	1	0.0543648	1	1	0.072297
Chm	-0.00819496	1	-0.125222	1	-0.00506429	1	1	-0.0461603
Chml	-0.0125727	1	-0.0134992	1	-0.0237653	1	1	-0.0166124
Chmp1a	-0.0226737	1	0.0486888	1	-0.00482544	1	1	0.00706319
Chmp1b	-0.0492571	1	-0.0665746	1	0.0248905	1	1	-0.0303137
Chmp2a	-0.0878899	1	-0.0864379	1	0.17773	1	1	0.00113405
Chmp2b	-0.00882579	1	-0.00303431	1	0.0352145	1	1	0.00778481
Chmp3	-0.104026	1	-0.0301765	1	0.0962221	1	1	-0.0126603
Chmp4b	-0.228155	1	-0.1332	1	0.08062	1	1	-0.0935784
Chmp5	0.118572	1	0.205559	1	0.0754711	1	1	0.133201
Chmp6	0.0875378	1	-0.0645086	1	0.0146576	1	1	0.0125623
Chmp7	0.0136386	1	-0.054276	1	0.0101117	1	1	-0.0101752
Chordc1	0.000774727	1	0.0431018	1	0.136646	1	1	0.0601743
Chp1	-0.0173236	1	-0.0382274	1	0.0280952	1	1	-0.0091519
Chpf	0.0508274	1	0.0519647	1	0.0644042	1	1	0.0557321
Chpf2	-0.0224471	1	0.018838	1	-0.00967908	1	1	-0.00442939
Chpt1	-0.0498068	1	0.070553	1	0.0239367	1	1	0.0148943
Chrac1	0.0590975	1	0.129983	1	-0.0571964	1	1	0.0439614
Chrnb1	-0.0372862	1	-0.00343615	1	0.00637957	1	1	-0.0114476
Chst11	-0.0271381	1	0.04471	1	0.171996	1	1	0.0631893
Chst12	0.0618109	1	-0.064933	1	0.030162	1	1	0.0090133
Chst14	0.00404717	1	0.0128285	1	-0.0544318	1	1	-0.0125187
Chst15	-0.04687	1	-0.01917	1	-0.00464594	1	1	-0.023562
Chsy1	-0.0449313	1	-0.0772851	1	-0.0976706	1	1	-0.0732957
Chtf18	0.0577543	1	-0.00379885	1	0.0309376	1	1	0.0282977
Chtf8	0.0357247	1	0.038777	1	0.0625019	1	1	0.0456678
Chtop	0.0215312	1	0.0825417	1	-0.0227217	1	1	0.027117
Chuk	0.0251984	1	-0.0280855	1	0.0247251	1	1	0.00727933
Churc1	-0.0220426	1	0.0617133	1	0.065103	1	1	0.0349245
Ciao1	-0.0248926	1	-0.0449217	1	-0.109162	1	1	-0.0596588
Ciapin1	0.247754	0.164084	0.190335	1	0.0847888	1	0.728645	0.174293
Ciart	-0.000549097	1	0.0937689	0.603776	-0.0172038	1	0.985265	0.0253387
Cib1	0.105025	1	0.0465987	1	0.0593872	1	1	0.070337
Cic	-0.0754274	1	-0.0302799	1	0.0190648	1	1	-0.0288808
Cinp	0.126427	1	0.0765143	1	0.153011	1	1	0.118651
Cipc	0.00436994	1	-0.0118552	1	-0.0387846	1	1	-0.0154233
Cir1	-0.0542182	1	-0.0841297	1	-0.0621879	1	1	-0.0668453
Cirbp	0.0641225	1	0.0811465	1	0.0413998	1	1	0.0622229
Cisd1	-0.070039	1	0.124762	1	0.166034	1	1	0.0735855
Cisd2	0.20339	1	0.259955	6.4012e-05	-0.0108244	1	0.0036666	0.15084
Cisd3	-0.0602675	1	-0.0337722	1	-0.153156	1	1	-0.0823985
Cit	0.0203184	1	0.0996678	1	-0.0780066	1	1	0.0139932
Cited2	-0.107537	1	-0.20742	1	-0.00775611	1	1	-0.107571
Ciz1	-0.0282997	1	-0.012717	1	0.00185782	1	1	-0.0130529
Ckap2	0.0391197	1	0.0626051	1	0.0984524	1	1	0.0667257
Ckap2l	-0.000158542	1	-0.0907096	1	0.00190024	1	1	-0.029656
Ckap4	0.0136843	1	-0.0325962	1	-0.0169741	1	1	-0.011962
Ckap5	0.0278294	1	-0.10843	1	0.138664	1	1	0.0193546
Cklf	-0.00169454	1	-0.00178114	1	0.0473375	1	1	0.0146206
Cks1b	0.174484	1	0.0639346	1	-0.144774	1	1	0.0312148
Cks2	0.0960965	1	-0.0397719	1	-0.139513	1	1	-0.0277294
Clasp1	0.0512431	1	-0.0648369	1	0.0441522	1	1	0.0101862
Clasp2	-0.0522155	1	-0.0190042	1	-0.0209213	1	1	-0.0307137
Clasrp	0.00723671	1	-0.0187535	1	0.00393701	1	1	-0.00252659
Clcc1	0.0350296	1	0.122302	1	0.0516806	1	1	0.0696706
Clcf1	0.0160527	1	0.0400448	1	0.0892369	1	1	0.0484448
Clcn3	0.167789	1	0.142959	1	0.309388	1	1	0.206712
Clcn4	-0.00866528	1	-0.0351315	1	0.0289009	1	1	-0.00496528
Clcn5	-0.0723393	1	-0.0972793	1	0.014997	1	1	-0.0515406
Cldn12	0.046701	1	0.0336454	1	-0.0184068	1	1	0.0206465
Cldnd1	0.00698422	1	0.0577762	1	0.0335015	1	1	0.032754
Clec16a	0.00455656	1	-0.00515474	1	-0.0163904	1	1	-0.00566286
Clic1	-0.212879	1	-0.214712	0.168453	-0.0757679	1	0.735677	-0.167786
Clic4	-0.0950746	1	0.00640753	1	0.064179	1	1	-0.0081627
Clint1	0.042353	1	0.0916782	1	0.0643125	1	1	0.0661146
Clip1	-0.0761683	1	0.00889488	1	0.00257049	1	1	-0.0215677
Clip2	-0.0206818	1	0.00160749	1	-0.00347861	1	1	-0.00751763
Clip4	-0.102478	1	-0.0707843	1	0.0788806	1	1	-0.0314605
Clk1	-0.0302563	1	-0.0021235	1	-0.0790825	1	1	-0.0371541
Clk2	-0.0123764	1	0.0169611	1	0.16036	1	1	0.0549815
Clk3	-0.0324258	1	0.0200788	1	0.019815	1	1	0.00248934
Clk4	-0.0446592	1	-0.0342482	1	0.128068	1	1	0.016387
Cln3	0.0456484	1	0.0112914	1	-0.0499482	1	1	0.00233053
Cln5	0.0660606	1	0.0176971	1	-0.116341	1	1	-0.0108612
Cln6	-0.0135368	1	0.048241	1	0.0929415	1	1	0.0425486
Clns1a	0.0701978	1	0.0551773	1	-0.0546185	1	1	0.0235855
Clock	-0.0266531	1	-0.114888	1	-0.0139464	1	1	-0.051829
Clp1	-0.0353535	1	0.0149778	1	0.0335991	1	1	0.0044078
Clpb	0.0663461	1	0.0859205	1	-0.136291	1	1	0.00532524
Clpp	0.387071	4.4292e-06	0.0523474	1	0.0471946	1	0.000395565	0.162204
Clptm1	0.0640799	1	0.0453027	1	0.0238513	1	1	0.0444113
Clptm1l	-0.0413961	1	-0.0947345	1	-0.116371	1	1	-0.0841671
Clpx	-0.0358326	1	-0.0189873	1	-0.0140345	1	1	-0.0229514
Clspn	0.156028	1	0.151881	1	0.157032	1	1	0.15498
Clstn1	0.0424144	1	0.0828632	1	0.0446818	1	1	0.0566531
Clta	0.154432	1	0.212631	0.0176619	0.0517229	1	0.232826	0.139595
Cltb	-0.159551	1	0.00202561	1	-0.142519	1	1	-0.100015
Cltc	0.0194977	1	0.165658	1	0.201167	1	1	0.128774
Clu	-0.356363	1	0.00214944	1	-0.225977	1	1	-0.193397
Cluap1	0.00915374	1	-0.0183237	1	0.0524264	1	1	0.0144188
Cluh	0.0385195	1	-0.00102568	1	0.0157333	1	1	0.0177424
Clybl	0.0307739	1	0.0114682	1	0.0490165	1	1	0.0304195
Cmas	0.0382209	1	0.065351	1	0.0321997	1	1	0.0452572
Cmc1	-0.142604	1	-0.0488374	1	0.0119579	1	1	-0.0598277
Cmc2	-0.0170048	1	0.116132	1	0.219943	1	1	0.106357
Cmc4	-0.05844	1	-0.00847084	1	-0.0279022	1	1	-0.0316043
Cmip	-0.103394	1	0.0629093	1	0.0162638	1	1	-0.00807356
Cmpk1	0.0281496	1	0.21568	0.387598	-0.0631049	1	0.929047	0.0602414
Cmss1	0.0611986	1	-0.0159987	1	0.140625	1	1	0.0619417
Cmtm3	-0.00915706	1	-0.0186065	1	-0.0282072	1	1	-0.0186569
Cmtm4	-0.0281678	1	-0.0791183	1	0.136165	1	1	0.00962622
Cmtm6	0.0270211	1	0.0288861	1	0.0348646	1	1	0.0302573
Cmtm7	-0.0269513	1	0.0443711	1	0.0714263	1	1	0.0296154
Cnbp	0.113106	1	0.163259	1	-0.0427329	1	1	0.0778774
Cndp2	-0.0515015	1	-0.0627443	1	-0.0232395	1	1	-0.0458284
Cnep1r1	0.0770186	1	0.0154244	1	0.037084	1	1	0.0431757
Cnih1	0.189298	0.100934	0.107783	1	-0.0907054	1	0.597819	0.068792
Cnih4	0.135667	1	0.113109	1	-0.000431457	1	1	0.0827813
Cnn2	-0.0377931	1	-0.0117216	1	0.164292	1	1	0.0382592
Cnn3	0.033862	1	0.150992	0.714016	-0.13486	1	0.995041	0.0166646
Cnnm3	0.0148714	1	0.0556085	1	-0.0104603	1	1	0.0200065
Cnnm4	0.073495	1	-0.00528673	1	0.173612	1	1	0.0806067
Cnot1	0.0865801	1	-0.0285687	1	0.0895726	1	1	0.0491947
Cnot10	0.0682455	1	0.0303791	1	0.00352142	1	1	0.0340487
Cnot11	0.109502	1	0.0591068	1	0.0506013	1	1	0.0730702
Cnot2	0.020673	1	0.0711003	1	0.106111	1	1	0.0659614
Cnot3	0.1168	1	0.156229	1	0.202297	1	1	0.158442
Cnot4	-0.00321206	1	-0.0209085	1	-0.0211598	1	1	-0.0150935
Cnot6	-0.0354119	1	0.0136139	1	-0.0739875	1	1	-0.0319285
Cnot6l	0.0121937	1	0.0524101	1	0.0246182	1	1	0.0297407
Cnot7	-0.0542031	1	0.0948223	1	0.0903668	1	1	0.043662
Cnot8	0.0552214	1	0.0175484	1	0.0946398	1	1	0.0558032
Cnot9	0.00223211	1	-0.00686294	1	0.0181116	1	1	0.00449359
Cnp	-0.0091889	1	-0.0208358	1	-0.0245922	1	1	-0.0182056
Cnppd1	-0.00340712	1	-0.089408	1	0.0363628	1	1	-0.0188174
Cnpy2	-0.0328333	1	-0.0977092	1	0.0337938	1	1	-0.0322496
Cnpy3	0.0879482	1	0.0789488	1	0.0533562	1	1	0.0734177
Cnpy4	0.0575726	1	0.0872298	1	-0.0195471	1	1	0.0417517
Cntln	0.0600726	1	0.139869	1	0.0834676	1	1	0.0944699
Cntrl	0.00667056	1	-0.029978	1	-0.0196717	1	1	-0.0143264
Cntrob	-0.0107992	1	0.0170341	1	0.0330081	1	1	0.013081
Coa3	-0.178943	1	-0.156419	1	-0.0142989	1	1	-0.116554
Coa4	-0.0199204	1	-0.00769149	1	-0.0250395	1	1	-0.0175505
Coa5	-0.00964402	1	0.0206421	1	0.0198238	1	1	0.010274
Coa6	0.0894227	1	0.0258065	1	0.176906	1	1	0.0973785
Coa7	0.0859221	1	0.0521721	1	-0.0296794	1	1	0.0361383
Coasy	-0.0199611	1	-0.0314029	1	-0.0511675	1	1	-0.0341772
Cobl	0.0171879	1	0.0205589	1	0.113978	1	1	0.0505751
Cobll1	-0.00576988	1	0.00665407	1	0.0458096	1	1	0.0155646
Cog1	0.0585844	1	0.0474948	1	0.064141	1	1	0.05674
Cog2	0.0556698	1	0.00910822	1	-0.0345856	1	1	0.0100642
Cog4	0.0811244	1	-0.0175287	1	0.000366675	1	1	0.0213208
Cog5	-0.0155938	1	0.0295767	1	-0.00374632	1	1	0.0034122
Cog6	0.0378702	1	0.0220837	1	-0.0391797	1	1	0.00692472
Cog7	-0.0182601	1	-0.0331489	1	-0.00989061	1	1	-0.0204332
Cog8	0.108827	1	0.0802054	1	0.0346882	1	1	0.0745737
Coil	0.011095	1	0.0241662	1	-0.00485482	1	1	0.0101354
Col12a1	-0.0064273	1	-0.0255717	1	-0.0588571	1	1	-0.0302853
Col16a1	-0.0409413	1	-0.0320213	1	0.0273414	1	1	-0.0152071
Col18a1	-0.175035	1	-0.286995	1	-0.103305	1	1	-0.188445
Col1a1	-0.261601	1	0.00104853	1	-0.186673	1	1	-0.149075
Col1a2	0.819128	2.04582e-12	1.01392	8.14756e-11	0.872613	1	2.18098e-19	0.901889
Col23a1	-0.0600557	1	0.00318749	1	-0.0530717	1	1	-0.0366466
Col3a1	-0.495454	0.688991	-0.262837	1	-0.454702	1	0.993467	-0.404331
Col4a1	-0.196745	1	-0.0155697	1	-0.24942	1	1	-0.153912
Col4a2	-0.106905	1	-0.0279919	1	-0.129407	1	1	-0.0881011
Col4a3bp	-0.0627619	1	-0.0879902	1	-0.137129	1	1	-0.0959604
Col4a5	-0.0159158	1	-0.18328	1	-0.0992967	1	1	-0.0994974
Col5a1	-0.0628197	1	-0.161996	1	0.0190813	1	1	-0.0685783
Col5a3	-0.0631238	1	-0.0671721	1	0.00917108	1	1	-0.0403749
Col6a1	-0.430494	1	-0.0844521	1	0.138478	1	1	-0.12549
Col6a2	-0.254704	1	-0.0314918	1	-0.0093993	1	1	-0.0985316
Col6a3	-0.446889	1	-0.269449	1	0.100142	1	1	-0.205399
Col7a1	-0.122353	1	-0.176824	1	-0.0520324	1	1	-0.11707
Col8a1	0.124109	1	0.163764	1	0.0592897	1	1	0.115721
Colgalt1	0.0305989	1	-0.0497236	1	-0.00381171	1	1	-0.00764544
Commd1	-0.0386537	1	-0.0384091	1	0.0290329	1	1	-0.01601
Commd10	0.0357187	1	0.0178509	1	0.0199857	1	1	0.0245184
Commd2	0.0208319	1	0.0506849	1	-0.0267988	1	1	0.014906
Commd3	-0.0541452	1	-0.176509	1	0.0322992	1	1	-0.0661182
Commd4	-0.0449293	1	0.0740522	1	-0.197278	1	1	-0.0560516
Commd6	0.0506641	1	0.133248	1	0.0520046	1	1	0.0786389
Commd7	0.0719475	1	0.196364	1	-0.0871544	1	1	0.0603858
Commd8	-0.0240095	1	-0.0568925	1	-0.0977596	1	1	-0.0595538
Commd9	0.033702	1	-0.0178042	1	-0.0377805	1	1	-0.00729422
Comt	0.0677673	1	0.182168	1	0.0366196	1	1	0.0955183
Comtd1	0.0565901	1	0.00278651	1	-0.0140728	1	1	0.0151013
Cop1	0.00256211	1	0.00765894	1	0.00351918	1	1	0.00458007
Copa	0.00600555	1	0.0598165	1	-0.0643788	1	1	0.00048109
Copb1	0.0937366	1	0.07845	1	0.00710647	1	1	0.0597644
Copb2	0.0688443	1	0.0971291	1	0.0208323	1	1	0.0622686
Cope	-0.00159758	1	0.100464	1	-0.0490174	1	1	0.0166164
Copg1	0.0934435	1	0.0960873	1	-0.0158994	1	1	0.0578771
Copg2	-0.0409461	1	0.084658	1	0.0498636	1	1	0.0311918
Coprs	0.018374	1	0.12317	1	0.054457	1	1	0.0653337
Cops2	0.017929	1	-0.0396133	1	-0.161932	1	1	-0.0612053
Cops3	0.087213	1	0.185251	1	-0.158478	1	1	0.0379953
Cops4	0.0700191	1	0.119606	1	0.0378429	1	1	0.0758225
Cops5	0.0528586	1	0.117523	1	0.0434979	1	1	0.0712931
Cops6	0.0926408	1	0.0452007	1	0.0939386	1	1	0.07726
Cops7a	-0.00397395	1	0.152522	1	0.086326	1	1	0.0782913
Cops7b	0.0700362	1	0.0759228	1	0.0853466	1	1	0.0771019
Cops8	-0.0575516	1	0.0508772	1	-0.0265548	1	1	-0.0110764
Cops9	-0.193073	1	-0.0590968	1	-0.112606	1	1	-0.121592
Copz1	0.0284179	1	0.0634484	1	-0.0583606	1	1	0.0111686
Copz2	-0.0610286	1	-0.0461352	1	0.0160758	1	1	-0.0303627
Coq10a	-0.0173755	1	-0.0257681	1	0.0311913	1	1	-0.0039841
Coq10b	0.0630417	1	0.0580882	1	0.0587496	1	1	0.0599598
Coq2	0.00677583	1	-0.0316031	1	-0.0281361	1	1	-0.0176545
Coq3	0.00945695	1	0.01541	1	0.0375661	1	1	0.020811
Coq4	-0.028581	1	-0.0190185	1	-0.0200295	1	1	-0.022543
Coq5	0.154035	1	-0.0291346	1	0.0102108	1	1	0.045037
Coq6	0.0553957	1	-0.0105337	1	-0.0856609	1	1	-0.0135996
Coq7	0.0298247	1	-0.0322894	1	-0.0791439	1	1	-0.0272029
Coq9	-0.015796	1	0.0695118	1	0.0735179	1	1	0.0424112
Coro1b	0.0572099	1	-0.0403441	1	0.02565	1	1	0.0141719
Coro1c	-0.00997478	1	0.0391098	1	-0.0680404	1	1	-0.0129685
Cotl1	-0.145481	1	-0.173495	1	0.0482562	1	1	-0.0902398
Cox10	0.0627002	1	0.00802916	1	0.011377	1	1	0.0273688
Cox11	0.0119357	1	0.0353102	1	0.0418217	1	1	0.0296892
Cox14	-0.00278853	1	0.216486	1	0.158505	1	1	0.124067
Cox16	-0.0412097	1	-0.0207415	1	-0.00545142	1	1	-0.0224675
Cox17	-0.169792	1	0.121589	1	0.153288	1	1	0.0350285
Cox18	0.00407124	1	-0.0148213	1	0.0686786	1	1	0.0193095
Cox19	-0.0350671	1	0.0260393	1	-0.0536535	1	1	-0.0208938
Cox20	-0.0171562	1	0.13791	1	0.0853552	1	1	0.0687029
Cox4i1	-0.115036	1	0.0554408	1	-0.0444759	1	1	-0.0346905
Cox5a	-0.0758089	1	-0.0179112	1	0.0271322	1	1	-0.022196
Cox5b	-0.0515883	1	0.0687849	1	-0.0471443	1	1	-0.00998257
Cox6a1	-0.0449078	1	0.0206945	1	-0.0843728	1	1	-0.0361954
Cox6b1	-0.119559	1	-0.072321	1	0.0719705	1	1	-0.03997
Cox6c	0.0388357	1	0.114892	1	0.0496269	1	1	0.0677849
Cox7a2	-0.0018529	1	0.062156	1	0.0935867	1	1	0.0512966
Cox7a2l	0.0647035	1	0.113239	1	0.093561	1	1	0.0905012
Cox7b	-0.411639	0.0016295	-0.690177	2.55417e-16	0.147932	1	3.90791e-16	-0.317961
Cox7c	-0.173466	1	-0.259759	0.0038545	-0.110105	1	0.0848262	-0.18111
Cox8a	0.117723	1	-0.0661452	1	0.143198	1	1	0.0649252
Cp	-0.530643	9.48751e-05	-0.758885	1.39385e-06	-0.527898	1	3.7351e-08	-0.605809
Cpd	0.0874128	1	0.13696	1	-0.0410223	1	1	0.0611169
Cpe	-0.224044	1	-0.153323	1	0.0276504	1	1	-0.116572
Cpeb2	-0.06174	1	-0.039819	1	0.017188	1	1	-0.0281237
Cpne3	-0.0667495	1	-0.0401734	1	0.108599	1	1	0.000558845
Cpne8	0.0304442	1	-0.0225723	1	-0.00846559	1	1	-0.000197899
Cpox	0.117787	1	0.0680522	1	0.0335219	1	1	0.0731205
Cpq	-0.0596124	1	-0.00347541	1	0.0340141	1	1	-0.00969126
Cpsf1	0.00332738	1	0.0420271	1	-0.00796213	1	1	0.0124641
Cpsf2	0.15672	1	0.100395	1	-0.0112786	1	1	0.0819456
Cpsf3	0.0373431	1	0.00569807	1	-0.0101233	1	1	0.0109726
Cpsf4	0.0585263	1	-0.0325326	1	0.0151767	1	1	0.0137235
Cpsf6	0.0322985	1	-0.0314718	1	-0.0134286	1	1	-0.00420065
Cpsf7	0.0104326	1	0.0203265	1	0.116572	1	1	0.0491102
Cpt1a	0.0429246	1	0.0174383	1	0.0637699	1	1	0.0413776
Cpt2	0.00257098	1	0.0502744	1	0.00756855	1	1	0.020138
Cptp	0.0348899	1	0.016287	1	0.0403246	1	1	0.0305005
Cr1l	-0.00120747	1	0.0372278	1	0.0509388	1	1	0.0289864
Crabp2	0.178557	1	0.332342	0.00233077	0.351803	1	0.059278	0.287567
Cradd	0.0806293	1	0.0467616	1	-0.0499048	1	1	0.0258287
Cramp1l	0.0147839	1	-0.0210366	1	0.0644584	1	1	0.0194019
Crat	-0.0371567	1	-0.0274604	1	0.000966109	1	1	-0.021217
Crbn	0.0121268	1	-0.0400705	1	-0.0132104	1	1	-0.013718
Crcp	0.0379136	1	0.0858668	1	-0.0919763	1	1	0.0106014
Creb1	0.0799262	1	-0.0785186	1	-0.0757758	1	1	-0.0247894
Creb3	-0.00248616	1	-0.0121021	1	-0.103176	1	1	-0.0392547
Creb3l2	0.027261	1	0.0862099	1	-0.0644599	1	1	0.016337
Creb5	0.0328629	1	0.0338597	1	-0.215065	1	1	-0.0494475
Crebbp	-0.0570551	1	-0.0567328	1	0.263546	1	1	0.0499193
Crebrf	-0.0533638	1	-0.0735809	1	-0.00269604	1	1	-0.0432136
Crebzf	-0.0433685	1	-0.0563774	1	-0.000549014	1	1	-0.0334316
Creg1	-0.115222	1	-0.08441	1	0.0367075	1	1	-0.0543082
Creld2	0.0607929	1	0.10328	1	-0.216905	1	1	-0.0176108
Crem	-0.00935691	1	-0.0292428	1	0.0419732	1	1	0.00112448
Crim1	0.0037834	1	0.129112	1	0.0266991	1	1	0.053198
Crip1	-0.365406	1	-0.271158	1	0.279699	1	1	-0.118955
Crip2	0.279085	0.00608215	0.154764	0.106558	0.351634	1	0.0228716	0.261827
Cript	0.161273	1	0.0700943	1	0.0630618	1	1	0.0981429
Crk	0.199533	1	0.161882	1	0.0121088	1	1	0.124508
Crkl	0.021516	1	-0.0343426	1	0.00442619	1	1	-0.00280014
Crlf2	-0.0140713	1	0.0178021	1	0.0823341	1	1	0.0286883
Crlf3	-0.00190925	1	0.0375093	1	0.0387308	1	1	0.024777
Crls1	-0.0846844	1	-0.000432957	1	0.104888	1	1	0.00659029
Crnkl1	-0.0344003	1	-0.087857	1	-0.0546242	1	1	-0.0589605
Crot	0.0282128	1	-0.0292776	1	0.00102544	1	1	-1.31221e-05
Crtap	-0.0162481	1	-0.0201006	1	0.234859	1	1	0.0661701
Crtc1	0.0239959	1	0.0329773	1	0.0036292	1	1	0.0202008
Crtc2	-0.00459245	1	0.0427962	1	0.0173843	1	1	0.0185293
Crtc3	-0.0668875	1	0.0202391	1	-0.0537114	1	1	-0.0334533
Cry1	-0.0082079	1	0.0773106	1	0.0574211	1	1	0.0421746
Cryab	-0.387221	1	0.239691	1	-0.138	1	1	-0.0951765
Cryba4	0.00794974	1	0.0550195	1	0.0201852	1	1	0.0277181
Crybb3	-0.0161255	1	0.0966112	0.0303444	0.0635844	1	0.321746	0.0480234
Crybg1	0.0459072	1	0.070524	1	0.201407	1	1	0.105946
Cryz	-0.0208325	1	0.102993	1	0.0999552	1	1	0.0607052
Cryzl1	0.0960527	1	0.0282623	1	0.0105466	1	1	0.0449539
Cs	-0.0714679	1	-0.114818	1	-0.11868	1	1	-0.101655
Csad	-0.0179008	1	0.00658647	1	-0.0315491	1	1	-0.0142878
Csde1	0.0485687	1	0.0502702	1	0.0512901	1	1	0.050043
Cse1l	0.0536171	1	0.0417597	1	0.107045	1	1	0.0674739
Csf1	0.0962945	1	-0.0369071	1	0.017646	1	1	0.0256778
Csgalnact2	-0.0318935	1	0.0262933	1	-0.0497051	1	1	-0.0184351
Csk	-0.0237927	1	0.0321136	1	-0.0463329	1	1	-0.0126707
Csnk1a1	-0.0423026	1	-0.094136	1	-0.0699619	1	1	-0.0688002
Csnk1d	0.0199273	1	0.0186487	1	0.112177	1	1	0.050251
Csnk1e	-0.159674	1	-0.129171	1	-0.0633729	1	1	-0.117406
Csnk1g1	-0.0372213	1	-0.00761069	1	-0.129328	1	1	-0.0580534
Csnk1g2	0.0271209	1	0.0396212	1	-0.0105505	1	1	0.0187305
Csnk1g3	0.0818403	1	-0.121729	1	-0.023005	1	1	-0.0209647
Csnk2a1	-0.011917	1	-0.0811684	1	-0.0601177	1	1	-0.0510677
Csnk2a2	0.00986548	1	0.0371304	1	0.158086	1	1	0.0683608
Csnk2b	0.213592	1	0.0391856	1	0.00157018	1	1	0.0847826
Cspg5	-0.00177408	1	-0.0321378	1	0.0250302	1	1	-0.00296054
Cspp1	-0.0154672	1	-0.0702385	1	0.00895258	1	1	-0.0255844
Csrnp1	-0.0492918	1	-0.0672678	1	0.0607017	1	1	-0.0186193
Csrp1	-0.0854639	1	-0.0219342	1	0.0423875	1	1	-0.0216702
Csrp2	0.220817	1	0.4139	0.000152718	0.12829	1	0.00739032	0.254336
Cst3	-0.25575	1	-0.0491921	1	-0.232486	1	1	-0.179143
Cst6	0.053721	1	0.110609	1	0.0377176	1	1	0.0673491
Cstb	-0.19523	1	-0.0757419	1	0.133493	1	1	-0.0458263
Cstf1	0.0730302	1	-0.0219124	1	0.0396427	1	1	0.0302535
Cstf2	-0.0720686	1	-0.0561156	1	0.076003	1	1	-0.0173937
Cstf2t	-0.0328375	1	-0.0129534	1	0.157547	1	1	0.0372519
Cstf3	0.0418885	1	0.0479062	1	0.0506687	1	1	0.0468211
CT025619.1	-0.068979	1	0.00817752	1	-0.020804	1	1	-0.0272018
Ctbp1	0.113252	1	0.0315358	1	-0.0948014	1	1	0.0166622
Ctbp2	0.0801224	1	-0.034557	1	0.0404659	1	1	0.0286771
Ctbs	0.0571408	1	-0.0156702	1	0.00461687	1	1	0.0153625
Ctc1	-0.0111332	1	-0.00750542	1	-0.0378171	1	1	-0.0188186
Ctcf	0.0594223	1	0.019381	1	0.11041	1	1	0.0630712
Ctdnep1	0.119576	1	0.136654	1	-0.0358726	1	1	0.0734524
Ctdp1	0.011042	1	0.00901903	1	-0.0475011	1	1	-0.00914668
Ctdsp1	0.0175924	1	0.0366254	1	-0.0963014	1	1	-0.0140279
Ctdsp2	-0.114619	1	-0.0607723	1	-0.00423131	1	1	-0.059874
Ctdspl	-0.0160579	1	-0.00950118	1	0.0294994	1	1	0.00131343
Ctdspl2	-0.00545287	1	-0.0518506	1	0.162968	1	1	0.0352216
Ctgf	-0.0750424	1	0.069218	1	0.000656327	1	1	-0.00172268
Cth	-0.0139531	1	0.00169122	1	0.0490041	1	1	0.0122474
Ctif	-0.0272537	1	-0.0138668	1	0.0397077	1	1	-0.000470923
Ctnna1	-0.0388223	1	-0.110843	1	0.0313098	1	1	-0.0394517
Ctnnal1	0.0844845	1	0.2618	3.75489e-08	0.11739	1	6.16785e-06	0.154558
Ctnnb1	0.0448659	1	0.0611415	1	-0.0860611	1	1	0.00664875
Ctnnbip1	0.212457	0.157288	0.0741128	1	0.121132	1	0.717285	0.135901
Ctnnbl1	-0.0638535	1	-0.0756414	1	-0.024177	1	1	-0.0545573
Ctnnd1	-0.0182603	1	-0.0852376	1	0.0231439	1	1	-0.0267847
Ctps	0.132444	1	0.173902	1	0.104941	1	1	0.137096
Ctps2	-0.0485304	1	-0.100358	1	-0.0263673	1	1	-0.0584187
Ctr9	0.0563974	1	-0.0868865	1	0.0313806	1	1	0.000297183
Ctsa	-0.0312153	1	0.0132715	1	-0.0690333	1	1	-0.0289924
Ctsb	-0.0597848	1	-0.11166	1	-0.0595394	1	1	-0.0769947
Ctsc	0.0514573	1	-0.0268281	1	0.0852216	1	1	0.0366169
Ctsd	0.0519271	1	0.0382417	1	-0.0163369	1	1	0.0246107
Ctsl	-0.331246	1	-0.371286	0.218233	-0.315058	1	0.803256	-0.339197
Ctss	-0.0330701	1	-0.0536624	1	-0.0903143	1	1	-0.0590156
Ctsz	0.076261	1	0.140678	1	-0.017806	1	1	0.0663777
Cttn	0.0426543	1	-0.0126597	1	-0.0122064	1	1	0.00592939
Cttnbp2nl	-0.100532	1	-0.133684	1	-0.0917303	1	1	-0.108649
Ctu2	0.0974904	1	0.0883531	1	-0.0157963	1	1	0.0566824
Ctxn1	-0.170449	1	-0.231537	1	-0.10617	1	1	-0.169385
Cuedc1	-0.0131349	1	0.0166992	1	0.0200836	1	1	0.00788264
Cuedc2	0.155765	1	0.070228	1	0.0572321	1	1	0.0944083
Cul1	0.0552448	1	0.0516278	1	0.243077	1	1	0.11665
Cul2	0.0257431	1	-0.00227089	1	-0.083232	1	1	-0.0199199
Cul3	0.0755196	1	0.0134888	1	0.100956	1	1	0.0633215
Cul4a	0.0878609	1	0.00524929	1	0.0706988	1	1	0.054603
Cul4b	-0.156516	1	-0.113051	1	0.092	1	1	-0.059189
Cul5	0.168854	1	0.0357463	1	-0.0107395	1	1	0.0646204
Cul7	0.0495337	1	0.125087	1	0.048241	1	1	0.0742871
Cuta	0.101326	1	0.00914603	1	-0.201073	1	1	-0.0302005
Cutc	0.000842105	1	0.0235652	1	-0.00691313	1	1	0.00583141
Cux1	-0.0746346	1	-0.164339	1	0.0170489	1	1	-0.0739748
Cwc15	-0.0672252	1	-0.0403691	1	-0.0216892	1	1	-0.0430945
Cwc22	-0.0195687	1	-0.0304708	1	-0.0180763	1	1	-0.0227053
Cwc25	0.0300098	1	-0.0502006	1	-0.0743117	1	1	-0.0315008
Cwc27	0.0580366	1	-0.00991071	1	-0.134216	1	1	-0.0286967
Cwf19l1	0.0331254	1	0.00101748	1	0.0316957	1	1	0.0219462
Cwf19l2	0.00537121	1	0.0450743	1	-0.0912184	1	1	-0.013591
Cx3cl1	0.0217942	1	0.0143749	1	-0.0986115	1	1	-0.0208141
Cxadr	0.0338385	1	-0.00096217	1	0.149554	1	1	0.0608101
Cxcl1	-0.429003	1	-0.422695	1	-0.270931	1	1	-0.37421
Cxcl10	-0.259178	1	0.0249763	1	-0.504465	1	1	-0.246222
Cxcl2	-0.101412	1	-0.0231065	1	-0.14333	1	1	-0.0892829
Cxcr6	-0.106538	1	-0.0209376	1	0.00403933	1	1	-0.0411453
Cxxc1	-0.0682506	1	-0.0379133	1	-0.0255447	1	1	-0.0439029
Cyb561d2	0.110004	1	0.039212	1	0.00796681	1	1	0.0523942
Cyb5a	-0.119068	1	-0.161271	1	-0.140679	1	1	-0.14034
Cyb5b	0.101168	1	0.0365541	1	0.108212	1	1	0.081978
Cyb5r1	-0.0275247	1	0.0909686	1	-0.0944012	1	1	-0.0103191
Cyb5r3	-0.044734	1	0.139372	1	0.232661	1	1	0.1091
Cyb5r4	0.0322409	1	-0.026078	1	0.0422502	1	1	0.0161377
Cyc1	0.149337	1	0.141524	1	-0.0774306	1	1	0.0711433
Cycs	0.061398	1	0.0897927	1	-0.018703	1	1	0.0441625
Cyfip1	0.00306398	1	-0.0683095	1	0.0608185	1	1	-0.00147567
Cyhr1	-0.0125336	1	0.115163	1	0.0590384	1	1	0.0538892
Cyld	-0.00372296	1	-0.0432134	1	0.170287	1	1	0.0411169
Cyp20a1	0.0254048	1	0.0183604	1	0.14028	1	1	0.0613484
Cyp4f13	-0.0139278	1	0.0299481	1	0.0250407	1	1	0.013687
Cyp4f16	-0.0177974	1	0.0283519	1	-0.0172567	1	1	-0.00223407
Cyp51	-0.104228	1	-0.0723228	1	0.0549378	1	1	-0.0405375
Cyr61	0.0067675	1	0.0041317	1	0.0844854	1	1	0.0317949
Cystm1	0.0855072	1	0.112066	1	0.0394423	1	1	0.0790052
Cyth1	-0.000617734	1	0.0244531	1	-0.0251363	1	1	-0.000433641
Cyth2	-0.0195778	1	-0.0848893	1	0.0226123	1	1	-0.0272849
Cyth3	-0.0935623	1	0.0761578	1	-0.118389	1	1	-0.0452644
D030056L22Rik	0.147563	1	-0.010167	1	-0.0033488	1	1	0.0446823
D10Jhu81e	0.033438	1	0.00163213	1	-0.0406687	1	1	-0.00186619
D10Wsu102e	-0.0329533	1	0.0388267	1	0.0266559	1	1	0.0108431
D16Ertd472e	-0.0281835	1	0.0743395	1	-0.0755709	1	1	-0.00980498
D17Wsu92e	0.0135637	1	0.0317835	1	-0.0728773	1	1	-0.00917669
D1Ertd622e	0.0648588	1	-0.0259419	1	-0.0169345	1	1	0.0073275
D230025D16Rik	0.00731352	1	-0.0199249	1	0.0529658	1	1	0.0134515
D3Ertd254e	-0.0481552	1	-0.0273355	1	-0.049539	1	1	-0.0416766
D3Ertd751e	0.0524639	1	0.0610011	1	-0.0341653	1	1	0.0264332
D430042O09Rik	0.00545812	1	0.0267676	1	-0.0436074	1	1	-0.0037939
D5Ertd579e	-0.0557579	1	-0.0593943	1	-0.0607869	1	1	-0.0586464
D5Ertd605e	-0.00403081	1	0.0717177	1	0.0809025	1	1	0.0495298
D8Ertd738e	-0.0789112	1	0.0997095	1	-0.00350809	1	1	0.00576342
Daam1	0.022869	1	-0.0970084	1	-0.00751408	1	1	-0.0272178
Dab2	0.0325528	1	0.0247721	1	-0.0111558	1	1	0.0153897
Dab2ip	-0.0758791	1	-0.115841	1	-0.0330814	1	1	-0.0749339
Dad1	0.0890809	1	-0.0576311	1	-0.0586282	1	1	-0.00905948
Dag1	0.0343041	1	-0.0128512	1	0.141546	1	1	0.0543329
Dalrd3	0.00920974	1	0.00684735	1	-0.0950673	1	1	-0.0263367
Dand5	0.0305666	1	0.0369455	1	0.0050911	1	1	0.0242011
Dap	-0.0873154	1	0.171779	1	-0.083891	1	1	0.00019072
Dap3	0.0267681	1	0.0572293	1	0.0972883	1	1	0.0604286
Dapk3	0.0750213	1	0.0960748	1	0.0369421	1	1	0.0693461
Dapp1	0.00301966	1	0.00482561	1	0.00937063	1	1	0.00573864
Dars	-0.0121345	1	-0.00858626	1	0.105897	1	1	0.0283922
Dars2	0.0182807	1	-0.0290986	1	0.0442745	1	1	0.0111522
Daxx	-0.0365217	1	0.0761833	1	-0.0450817	1	1	-0.0018067
Dazap1	0.105288	1	0.0383125	1	0.0387283	1	1	0.0607762
Dazap2	0.0232788	1	0.0527218	1	0.0259889	1	1	0.0339965
Dbf4	0.130364	1	0.057707	1	-0.105217	1	1	0.0276181
Dbi	0.13094	1	0.422474	8.86606e-06	-0.174344	1	0.000711943	0.126357
Dbn1	-0.045874	1	-0.117251	1	-0.105337	1	1	-0.0894873
Dbnl	-6.53445e-05	1	-0.00334575	1	-0.0122657	1	1	-0.00522561
Dbp	-0.0735468	1	0.0504151	1	0.0210383	1	1	-0.000697778
Dbr1	0.030321	1	-0.0449512	1	0.0451766	1	1	0.0101821
Dbt	0.0646404	1	0.0445963	1	0.0843111	1	1	0.064516
Dcaf1	0.065877	1	-0.0032555	1	0.0919444	1	1	0.051522
Dcaf10	0.0601854	1	-0.0184875	1	-0.0070739	1	1	0.0115413
Dcaf11	0.0101254	1	0.0151648	1	0.00172378	1	1	0.00900466
Dcaf12	0.0610942	1	0.131814	1	-0.0526919	1	1	0.0467388
Dcaf13	0.0249306	1	-0.0143046	1	0.0276903	1	1	0.0127721
Dcaf15	0.104292	1	0.016919	1	-0.0131292	1	1	0.0360274
Dcaf17	0.0329531	1	-0.013717	1	-0.00155226	1	1	0.0058946
Dcaf4	-0.00594623	1	-0.0103023	1	-0.0671568	1	1	-0.0278018
Dcaf5	-0.0498756	1	0.00290474	1	-0.0450889	1	1	-0.0306866
Dcaf6	0.00718499	1	-0.00933646	1	-0.0165612	1	1	-0.00623755
Dcaf7	0.102746	1	0.0527938	1	0.0507998	1	1	0.0687797
Dcaf8	-0.012095	1	0.0593975	1	0.105058	1	1	0.0507868
Dcakd	0.0804477	1	0.0996357	1	0.0675818	1	1	0.0825551
Dcbld1	-0.0118128	1	-0.0187516	1	0.0692486	1	1	0.0128947
Dcbld2	0.0275922	1	0.0092749	1	0.0289542	1	1	0.0219404
Dck	-0.00868884	1	0.0520202	1	-0.00852614	1	1	0.0116017
Dclk1	0.0107955	1	-0.0668246	1	0.0477741	1	1	-0.00275166
Dclre1a	0.0564919	1	-0.0261314	1	0.00322542	1	1	0.0111953
Dcp2	0.0429707	1	-0.0514675	1	0.0259875	1	1	0.00583024
Dcps	0.120494	1	0.0926886	1	-0.168367	1	1	0.0149387
Dctd	0.0988932	1	0.0524118	1	0.0719838	1	1	0.0744296
Dctn1	0.0692013	1	0.0672402	1	0.153581	1	1	0.0966742
Dctn2	-0.0585567	1	0.0996756	1	0.141814	1	1	0.0609777
Dctn3	0.100006	1	0.237764	0.365344	0.0975327	1	0.918422	0.145101
Dctn4	-0.079716	1	-0.0901787	1	-0.0955704	1	1	-0.0884884
Dctn5	0.0752717	1	0.012893	1	-0.0789585	1	1	0.00306873
Dctn6	0.0209184	1	-0.0369671	1	0.190168	1	1	0.0580399
Dctpp1	0.128844	1	0.099994	1	0.170177	1	1	0.133005
Dcun1d1	-0.025721	1	0.0280208	1	-0.100964	1	1	-0.032888
Dcun1d2	-0.00916645	1	0.0331697	1	0.0603679	1	1	0.0281237
Dcun1d4	0.00838617	1	0.00030043	1	0.0386926	1	1	0.0157931
Dcun1d5	-0.0582751	1	0.109588	1	-0.121725	1	1	-0.0234708
Dcxr	0.0133177	1	0.0402117	1	0.0628433	1	1	0.0387909
Dda1	-0.0787131	1	0.053022	1	0.0444797	1	1	0.00626286
Ddah1	0.115632	1	0.0696289	1	0.0184526	1	1	0.0679046
Ddah2	0.0584395	1	0.0587517	1	-0.127245	1	1	-0.00335123
Ddb1	0.261894	0.0109867	-0.0208807	1	-0.007937	1	0.172337	0.077692
Ddhd1	0.0302716	1	0.041635	1	-0.00067729	1	1	0.0237431
Ddhd2	0.0605776	1	0.0798008	1	0.0609468	1	1	0.0671084
Ddi2	0.0497954	1	0.0663876	1	0.0714361	1	1	0.0625397
Ddit3	-0.115244	1	0.27627	1	0.043481	1	1	0.0681691
Ddit4	-0.201016	1	-0.121732	1	-0.0175895	1	1	-0.113446
Ddost	0.153605	1	0.16825	1	-0.0810391	1	1	0.0802717
Ddr2	-0.0357807	1	0.0446945	1	0.0094014	1	1	0.00610507
Ddrgk1	-0.200065	1	-0.217647	1	-0.0430488	1	1	-0.153587
Ddt	-0.0403173	1	0.0579747	1	-0.0336711	1	1	-0.00533789
Ddx1	0.164803	1	0.1487	1	-0.0516977	1	1	0.0872685
Ddx10	0.12446	1	-0.0398758	1	0.036673	1	1	0.0404191
Ddx11	0.0437747	1	0.0147145	1	0.0488728	1	1	0.0357874
Ddx17	0.0894162	1	-0.00825849	1	0.0821905	1	1	0.0544494
Ddx18	0.0717741	1	0.14261	1	0.0537238	1	1	0.0893693
Ddx19a	0.0146758	1	0.0127209	1	0.0633465	1	1	0.0302477
Ddx19b	0.00709222	1	0.0286769	1	0.0240587	1	1	0.0199426
Ddx20	0.00275426	1	0.0572174	1	0.105748	1	1	0.0552399
Ddx21	0.0690719	1	0.0390694	1	0.19254	1	1	0.100227
Ddx23	-0.0148047	1	-0.0156587	1	-0.0052589	1	1	-0.0119074
Ddx24	-0.0126392	1	0.202445	1	0.13514	1	1	0.108315
Ddx27	0.0451084	1	-0.0333657	1	0.0777424	1	1	0.0298284
Ddx28	-0.0106784	1	-0.0335187	1	-0.0625043	1	1	-0.0355671
Ddx31	0.030241	1	0.0135007	1	-0.0329439	1	1	0.00359924
Ddx39	0.184446	1	0.227258	1	-0.147676	1	1	0.0880093
Ddx39b	0.0696373	1	-0.0738003	1	0.0639216	1	1	0.0199195
Ddx3x	-0.0447901	1	0.0654864	1	0.0888035	1	1	0.0365
Ddx41	-0.07383	1	-0.0412565	1	-0.0890959	1	1	-0.0680608
Ddx42	0.0032484	1	-0.046293	1	0.206198	1	1	0.0543846
Ddx46	-0.0559164	1	0.128766	1	-0.212591	1	1	-0.0465805
Ddx47	0.0463097	1	0.101206	1	-0.000592192	1	1	0.0489744
Ddx49	0.0583345	1	0.0284438	1	0.0131467	1	1	0.0333084
Ddx5	-0.185686	1	-0.20066	1	-0.027859	1	1	-0.138069
Ddx50	0.0885012	1	0.0701023	1	-0.0234962	1	1	0.0450358
Ddx51	0.0837141	0.306693	-0.0197036	1	0.016218	1	0.883387	0.0267428
Ddx52	0.148553	1	0.0819094	1	0.0205508	1	1	0.083671
Ddx54	0.0268315	1	0.0669373	1	0.151874	1	1	0.0818809
Ddx55	0.0498271	1	-0.0263892	1	-0.00651524	1	1	0.00564089
Ddx56	0.0642085	1	-0.023754	1	0.0192202	1	1	0.0198916
Ddx58	-0.0191262	1	0.10342	1	0.132116	1	1	0.0721365
Ddx59	0.0117033	1	0.0460309	1	0.00108625	1	1	0.0196068
Ddx6	-0.0521074	1	-0.0472517	1	0.0647673	1	1	-0.0115306
Ddx60	-0.00677439	1	0.0374473	1	0.0579892	1	1	0.029554
Deaf1	0.0375556	1	-0.0173224	1	-0.00173207	1	1	0.00616703
Decr1	-0.0339212	1	0.00711772	1	0.0151798	1	1	-0.00387457
Decr2	0.0190504	1	-0.00614815	1	-0.0396707	1	1	-0.0089228
Dedd	-0.0472053	1	-0.0231965	1	-0.000912297	1	1	-0.0237714
Def6	0.096405	1	-0.00845836	1	0.163374	1	1	0.0837737
Def8	0.0564977	1	0.015678	1	-0.0249297	1	1	0.0157487
Degs1	-0.0518771	1	0.060971	1	0.0304845	1	1	0.0131928
Dek	-0.0931948	1	-0.121414	1	-0.160606	1	1	-0.125072
Dennd1a	-0.0392616	1	-0.0453503	1	0.0064514	1	1	-0.0260535
Dennd1b	0.0191219	1	0.0394598	1	0.136765	1	1	0.0651157
Dennd2a	0.0316031	1	0.0560612	0.298168	0.0122932	1	0.87729	0.0333192
Dennd4a	0.043402	1	0.029162	1	-0.0729292	1	1	-0.00012176
Dennd4c	-0.00281844	1	0.0305443	1	-0.0292466	1	1	-0.000506915
Dennd5a	-0.00240604	1	-0.0302963	1	-0.0299637	1	1	-0.0208887
Dennd5b	-0.0198221	1	0.0425175	1	0.0530048	1	1	0.0252334
Dennd6a	0.0243686	1	0.000121634	1	-0.0067049	1	1	0.00592846
Denr	-0.00090299	1	-0.0284274	1	0.0262249	1	1	-0.00103518
Depdc1a	0.0695314	1	0.0531228	1	-0.0805182	1	1	0.0140454
Depdc5	-0.0250972	1	0.0129151	1	0.0231415	1	1	0.00365314
Depdc7	-0.022705	1	-0.0104472	1	0.0196152	1	1	-0.00451235
Deptor	0.0716739	1	0.0180239	1	-0.0227705	1	1	0.0223091
Dera	0.107166	1	0.131315	1	0.123275	1	1	0.120585
Derl1	0.0819688	1	0.0815238	1	0.0795805	1	1	0.0810244
Derl2	-0.0200641	1	0.0422028	1	0.0499958	1	1	0.0240448
Desi1	-0.0217552	1	0.0308189	1	-0.141175	1	1	-0.0440371
Desi2	0.0920681	1	0.014767	1	0.125343	1	1	0.0773928
Det1	-0.018073	1	0.0299369	1	-0.0674814	1	1	-0.0185392
Dexi	-0.0119183	1	0.00670621	1	0.102106	1	1	0.032298
Dgat1	0.0158786	1	0.0129123	1	-0.0213136	1	1	0.0024924
Dgcr14	-0.0175014	1	-0.0326921	1	-0.00247651	1	1	-0.0175567
Dgcr2	0.0783544	1	-0.00381338	1	0.0743326	1	1	0.0496245
Dgcr6	-0.107451	1	-0.0734292	1	-0.0483694	1	1	-0.0764164
Dgcr8	0.0355515	1	0.0449502	1	-0.0213884	1	1	0.0197045
Dgkd	-0.00697672	1	-0.00169146	1	0.0393371	1	1	0.010223
Dgkz	-0.0307733	1	-0.0287297	1	-0.0860591	1	1	-0.0485207
Dguok	0.0345457	1	0.0185487	1	0.0758954	1	1	0.0429966
Dhcr7	0.0550476	1	0.0161748	1	-0.0465661	1	1	0.00821878
Dhdds	0.0583059	1	0.00202668	1	0.0334436	1	1	0.0312587
Dhfr	-0.0212254	1	-0.0777985	1	0.0818277	1	1	-0.00573206
Dhodh	0.0865072	1	0.0497619	1	0.014529	1	1	0.0502661
Dhps	0.00525758	1	0.0791294	1	0.0840891	1	1	0.0561587
Dhrs1	0.10385	1	0.06271	1	0.0603332	1	1	0.0756311
Dhrs13	0.128603	1	0.0395378	1	0.143706	1	1	0.103949
Dhrs4	-0.0259172	1	0.0247907	1	0.128171	1	1	0.0423483
Dhrs7	-0.0661113	1	-0.0365735	1	0.133963	1	1	0.010426
Dhrs7b	0.0961069	1	0.0310109	1	-0.111036	1	1	0.00536073
Dhx15	0.128438	1	1.12187e-05	1	-0.153945	1	1	-0.00849862
Dhx16	0.0885987	1	0.0359981	1	0.0971177	1	1	0.0739048
Dhx29	-0.092839	1	-0.00782286	1	-0.0372848	1	1	-0.0459822
Dhx30	0.0840247	1	0.00198305	1	0.0585807	1	1	0.0481962
Dhx32	-0.0376648	1	-0.01845	1	0.00737216	1	1	-0.0162476
Dhx33	0.0016358	1	0.00113096	1	0.034072	1	1	0.0122796
Dhx36	0.161881	1	0.12215	1	0.0274085	1	1	0.103813
Dhx37	0.00815585	1	0.0163313	1	0.0540748	1	1	0.0261873
Dhx38	-0.0690472	1	0.108122	1	0.127949	1	1	0.0556746
Dhx40	0.0572351	1	0.152916	1	0.124051	1	1	0.111401
Dhx57	0.0714945	1	-0.00276068	1	0.0307564	1	1	0.0331634
Dhx8	-0.0327198	1	-0.00465855	1	-0.00554899	1	1	-0.0143091
Dhx9	0.00375743	1	-0.0293259	1	-0.0165902	1	1	-0.0140529
Diablo	0.0348243	1	0.0332948	1	0.0125804	1	1	0.0268998
Diaph1	-0.0402072	1	-0.0432144	1	-0.0103619	1	1	-0.0312611
Diaph2	-0.0307018	1	-0.065583	1	-0.0203942	1	1	-0.038893
Diaph3	0.177005	1	0.0372955	1	0.0866359	1	1	0.100312
Dicer1	0.00587428	1	0.0702609	1	0.0868906	1	1	0.0543419
Dido1	-0.0649307	1	0.00244801	1	0.0709234	1	1	0.00281357
Diexf	0.0722472	1	0.0654571	1	-0.00672109	1	1	0.0436611
Dimt1	0.00954112	1	-0.00711375	1	-0.14166	1	1	-0.0464108
Dip2a	-0.0279747	1	-0.0114589	1	-0.0606003	1	1	-0.0333446
Dip2b	0.0537414	1	0.0407034	1	0.0458532	1	1	0.046766
Dip2c	-0.0404959	1	-0.0547718	1	-0.109956	1	1	-0.068408
Dirc2	0.0794083	1	0.0533574	1	-0.0353069	1	1	0.0324863
Dis3	0.141975	1	0.116307	1	-0.0658582	1	1	0.0641414
Dis3l	0.0463158	1	-0.0231974	1	0.0156229	1	1	0.0129138
Dis3l2	0.0375291	1	0.0352682	1	0.0666953	1	1	0.0464975
Disp1	0.00306159	1	-0.0281168	1	-0.0334806	1	1	-0.0195119
Dixdc1	-0.00507832	1	0.00775586	1	-0.0595079	1	1	-0.0189434
Dkc1	0.118473	1	-0.100611	1	0.0704095	1	1	0.0294239
Dlat	0.0360142	1	-0.0659017	1	0.0493523	1	1	0.00648827
Dlc1	0.0655848	1	0.088046	1	0.0185696	1	1	0.0574001
Dld	0.0520896	1	0.0516574	1	0.128114	1	1	0.0772869
Dlg1	0.00275565	1	0.0377928	1	-0.00552231	1	1	0.0116754
Dlg3	-0.0178674	1	-0.0623156	1	0.0586867	1	1	-0.00716543
Dlg5	0.0057206	1	-0.0219695	1	0.0503844	1	1	0.0113785
Dlgap4	-0.141888	1	-0.111565	1	-0.106691	1	1	-0.120048
Dlgap5	0.16875	1	-0.030334	1	0.103203	1	1	0.0805397
Dlk2	0.192286	0.373606	0.00509455	1	0.0276477	1	0.922518	0.0750094
Dlst	-0.0150758	1	0.0760723	1	-0.0430031	1	1	0.0059978
Dmac1	0.0473978	1	0.0526221	1	0.00732013	1	1	0.03578
Dmac2	0.0224062	1	0.0200316	1	-0.0175978	1	1	0.00828001
[truncated: 6,661 more rows]

## Sheet: Clone2323_FindMarkers_by_sample
gene	logFC.DV1	adj.p.DV1	logFC.DV2	adj.p.DV2	logFC.DV3	adj.p.DV3	fisher.combined.pvalue	mean.logFC
0610009B22Rik	0.0853194	1	0.0392145	1	0.14607	1	1	0.0902015
0610009O20Rik	0.012343	1	0.0240971	1	0.0379103	1	1	0.0247835
0610010F05Rik	0.00910696	1	0.0353545	1	0.0469337	1	1	0.030465
0610010K14Rik	-0.00525286	1	-0.0218527	1	-0.0829711	1	1	-0.0366922
0610012G03Rik	0.0360093	1	0.0115315	1	0.0851955	1	1	0.0442455
0610030E20Rik	-0.00201163	1	0.00607236	1	0.0822007	1	1	0.0287538
0610037L13Rik	-0.0742789	0.107253	-0.0605079	1	-0.092885	1	0.613996	-0.0758906
1110002L01Rik	0.0058686	1	0.00406608	1	0.00718044	1	1	0.00570504
1110004E09Rik	-0.0268472	1	-0.0155058	1	-0.0703308	1	1	-0.0375613
1110004F10Rik	0.00249565	1	-0.00717644	1	-0.0574219	1	1	-0.0207009
1110008F13Rik	0.148759	0.000821274	0.164882	7.06953e-05	0.170867	0.284905	2.96813e-06	0.161503
1110008L16Rik	0.000425333	1	-0.00611613	1	-0.0403225	1	1	-0.0153378
1110008P14Rik	0.112599	1	0.10159	1	0.169316	1	1	0.127835
1110012L19Rik	0.0716156	1	0.0643872	1	0.156483	0.0288166	0.312277	0.0974953
1110032A03Rik	0.0247048	1	-0.00667346	1	-0.000999919	1	1	0.00567713
1110038F14Rik	0.0106687	1	0.0146449	1	0.0314503	1	1	0.0189213
1110046J04Rik	0.0266069	1	0.0253078	1	0.034841	1	1	0.0289186
1110059E24Rik	-0.0185901	1	0.018804	1	0.0190891	1	1	0.00643434
1110059G10Rik	0.0841326	1	0.0599836	1	0.0856573	1	1	0.0765912
1110065P20Rik	-0.18815	4.43214e-10	-0.166083	3.92165e-06	-0.259753	1.01191e-05	1.90133e-17	-0.204662
1190002N15Rik	-0.0584131	0.0207424	-0.0442042	1	-0.0467814	1	0.256907	-0.0497996
1190007I07Rik	0.0125895	1	0.00352262	1	-0.0218449	1	1	-0.00191093
1300002E11Rik	-0.0103936	1	0.00931378	1	0.0535119	1	1	0.0174774
1500011B03Rik	-0.0164223	1	-0.0398871	1	-0.0348223	1	1	-0.0303772
1500011K16Rik	-0.0146523	1	-0.0169888	1	0.0136759	1	1	-0.00598842
1600002K03Rik	-0.00596462	1	-0.0128079	1	-0.0251419	1	1	-0.0146382
1600012H06Rik	-0.0522072	1	-0.0426112	1	-0.0493106	1	1	-0.048043
1600020E01Rik	0.00874368	1	0.00940589	1	-0.0213541	1	1	-0.00106818
1700012B09Rik	-0.267944	8.14064e-06	-0.203667	0.0134936	-0.494733	3.43489e-06	1.65545e-10	-0.322115
1700017B05Rik	-0.0197329	1	-0.0204513	1	0.0478017	1	1	0.00253917
1700020I14Rik	0.0803483	1	0.0700789	1	0.0708152	1	1	0.0737475
1700021F05Rik	-0.0395672	1	0.0042564	1	0.0219818	1	1	-0.004443
1700025G04Rik	-0.00468383	1	0.0070086	1	0.0121954	1	1	0.00484007
1700037H04Rik	0.0677445	1	0.0756232	1	0.107809	1	1	0.0837255
1700052K11Rik	0.0706568	1	0.0394518	1	0.0507017	1	1	0.0536034
1700086O06Rik	0.0190666	1	-0.00310924	1	0.00664623	1	1	0.00753453
1700123O20Rik	-0.045214	1	-0.0223205	1	0.0197652	1	1	-0.0159231
1810009A15Rik	0.0442867	1	0.0204045	1	0.051768	1	1	0.0388197
1810013L24Rik	0.0589538	1	0.0225827	1	0.0729003	1	1	0.0514789
1810022K09Rik	0.145386	0.00210408	0.146587	0.000274486	0.176745	0.295811	2.35746e-05	0.156239
1810030O07Rik	0.0150706	1	0.042627	1	0.0501944	1	1	0.035964
1810032O08Rik	-0.00455725	1	0.0126069	1	0.0331693	1	1	0.0137397
1810037I17Rik	-0.228284	4.75766e-09	-0.147596	5.58204e-05	-0.170808	1	1.19298e-10	-0.182229
1810043G02Rik	0.0665482	1	0.0281938	1	0.084355	1	1	0.059699
1810055G02Rik	-0.00478458	1	0.00297089	1	0.0306529	1	1	0.00961306
1810058I24Rik	-0.098804	1	-0.14179	0.0111417	-0.14236	1	0.173909	-0.127651
1810062G17Rik	-0.000435415	1	-0.00842061	1	-0.0278767	1	1	-0.0122442
2010107E04Rik	-0.0286813	1	-0.0280703	1	-0.105322	1	1	-0.0540244
2010111I01Rik	0.099157	1	0.0384069	1	0.0847828	1	1	0.0741155
2010320M18Rik	-0.00376583	1	-0.0173301	1	0.030946	1	1	0.00328336
2200002D01Rik	-0.00347098	1	0.00484727	1	-0.109618	1	1	-0.0360804
2210016L21Rik	0.0382295	1	0.0295214	1	-0.0249373	1	1	0.0142712
2300009A05Rik	-0.00625413	1	-0.0359122	1	-0.0278624	1	1	-0.0233429
2310009B15Rik	-0.132587	0.00195024	-0.172413	1.53101e-05	-0.298149	1.39108e-07	2.41906e-12	-0.20105
2310011J03Rik	-0.00366567	1	-0.00856657	1	-0.0412712	1	1	-0.0178345
2310022A10Rik	0.00773346	1	0.0213628	1	-0.0114642	1	1	0.00587734
2310022B05Rik	0.0327799	1	-0.0239366	1	-0.033739	1	1	-0.00829858
2310030G06Rik	0.0207082	1	0.0177101	1	0.0378511	1	1	0.0254231
2310033P09Rik	0.0535617	1	0.0428328	1	0.0629838	1	1	0.0531261
2310035C23Rik	-0.0392189	1	-0.013224	1	-0.0615753	1	1	-0.0380061
2310039H08Rik	-0.0312663	1	-0.0840744	0.992336	-0.00233768	1	1	-0.0392261
2310057M21Rik	-0.0234057	1	-0.00577954	1	0.00618873	1	1	-0.00766549
2310061I04Rik	-0.0251352	1	-0.0199275	1	-0.050228	1	1	-0.0317636
2410002F23Rik	0.0109536	1	0.0374757	1	-0.00309314	1	1	0.015112
2410004B18Rik	-0.204579	3.2732e-15	-0.120968	4.77725e-06	-0.146674	0.163408	2.99612e-18	-0.157407
2410015M20Rik	0.05275	1	0.0331212	1	0.0814835	1	1	0.0557849
2410089E03Rik	0.0204797	1	0.0307723	1	-0.00118697	1	1	0.0166883
2410131K14Rik	-0.0412756	1	-0.0378845	1	-0.00293967	1	1	-0.0273666
2510002D24Rik	-0.0226344	1	0.0102538	1	-0.0477896	1	1	-0.0200567
2510039O18Rik	-0.108338	7.61085e-06	-0.0793236	0.0308375	-0.0950665	1	3.11621e-05	-0.0942427
2610001J05Rik	-0.052469	1	-0.0181929	1	-0.0586407	1	1	-0.0431009
2610002M06Rik	0.10796	1	0.136269	0.00687349	0.229374	1	0.12634	0.157868
2610301B20Rik	0.00547004	1	0.0102371	1	0.066215	1	1	0.0273074
2610507B11Rik	-0.222703	1.03888e-14	-0.145532	8.10456e-06	-0.232999	0.00018199	2.19635e-20	-0.200411
2610524H06Rik	0.063023	1	-0.0229443	1	0.0280717	1	1	0.0227168
2700049A03Rik	-0.00393483	1	-0.000815105	1	-0.00445324	1	1	-0.00306773
2700062C07Rik	0.0353012	1	0.0908357	0.617413	0.0948103	1	0.986925	0.0736491
2700081O15Rik	0.0327787	1	0.0553654	1	0.0685496	1	1	0.0522312
2700097O09Rik	-0.0271674	1	-0.00424835	1	-0.0162879	1	1	-0.0159012
2810004N23Rik	0.00784363	1	0.027028	1	0.0125951	1	1	0.0158222
2810006K23Rik	0.0307887	1	0.0248557	1	0.0571975	1	1	0.037614
2810403A07Rik	0.0138375	1	0.0344966	1	0.0161206	1	1	0.0214849
2810474O19Rik	0.0169886	1	0.0601404	1	0.0618204	1	1	0.0463165
2900026A02Rik	-0.0212866	1	-0.0341502	1	-0.0702317	1	1	-0.0418895
2900060B14Rik	-0.0123117	1	0.0152163	1	-0.0120553	1	1	-0.00305025
2900097C17Rik	0.232176	6.85481e-08	0.153015	0.000709274	0.251112	0.000137508	3.78593e-12	0.212101
3010003L21Rik	-0.0131796	1	-0.0116304	1	-0.0092835	1	1	-0.0113645
3110002H16Rik	0.0619279	1	0.0366841	1	-0.0140218	1	1	0.0281968
3110009E18Rik	-0.00680344	1	-0.0125166	1	-0.0284702	1	1	-0.0159301
3110040N11Rik	0.00124702	1	0.0412869	1	0.00897806	1	1	0.0171707
3110043O21Rik	-0.0389414	1	-0.0157168	1	-0.0480298	1	1	-0.0342293
3110062M04Rik	0.0230982	1	-0.0174447	1	-0.0138735	1	1	-0.00273999
3110082I17Rik	-0.0667323	1	-0.0147426	1	-0.0628093	1	1	-0.0480947
3300005D01Rik	-0.0070176	1	-0.00398947	1	-0.0327984	1	1	-0.0146018
3830403N18Rik	0.200396	8.07287e-07	0.137673	0.0112414	0.295805	4.21663e-09	2.88256e-14	0.211291
3830406C13Rik	-0.037385	1	-0.024679	1	-0.0154123	1	1	-0.0258254
4632415L05Rik	0.0608727	1	0.072405	1	0.0561583	1	1	0.0631454
4833420G17Rik	0.0586562	1	0.0536728	1	0.0792861	1	1	0.0638717
4833439L19Rik	-9.72907e-05	1	0.00788123	1	-0.0175749	1	1	-0.00326364
4921524J17Rik	-0.0887884	1	-0.141445	0.00194715	-0.138674	1	0.0520257	-0.122969
4930402H24Rik	0.030495	1	0.0214281	1	0.0837396	1	1	0.0452209
4930430F08Rik	-0.0145962	1	-0.00227191	1	-0.0127704	1	1	-0.0098795
4930453N24Rik	-0.0506389	1	-0.0082934	1	0.0269615	1	1	-0.010657
4930503L19Rik	0.0495927	1	0.0471202	1	0.0597545	1	1	0.0521558
4930523C07Rik	-0.237321	2.46321e-08	-0.239714	3.26017e-07	-0.175146	1	4.49817e-12	-0.217394
4930579G24Rik	-0.020638	1	-0.0149015	1	-0.0268868	1	1	-0.0208087
4931406C07Rik	0.0765454	1	0.0812744	1	0.0767467	1	1	0.0781889
4931406P16Rik	0.00988485	1	0.0423416	1	0.0470761	1	1	0.0331009
4931428F04Rik	-0.0604561	1	-0.036663	1	-0.0732483	1	1	-0.0567891
4932438A13Rik	0.0378739	1	0.0522916	1	0.0405909	1	1	0.0435854
4933404O12Rik	-2.14289e-05	1	0.0503376	1	0.0172523	1	1	0.0225228
4933427D14Rik	0.0205453	1	0.0134745	1	0.0111028	1	1	0.0150409
4933434E20Rik	0.00850484	1	0.016604	1	0.0171994	1	1	0.0141028
5031425E22Rik	-0.0232847	1	0.0151779	1	0.00647897	1	1	-0.000542638
5031439G07Rik	0.0252271	1	0.0117226	1	0.0368469	1	1	0.0245989
5033406O09Rik	-0.0185065	1	0.00841245	1	-0.00901239	1	1	-0.00636881
5430416N02Rik	-0.0153645	1	-0.0253467	1	-0.0121338	1	1	-0.017615
5430421F17Rik	-0.0412855	1	-0.0514413	0.179286	-0.0954708	0.0458761	0.142484	-0.0627325
5730455P16Rik	0.0108889	1	0.0026035	1	0.0273487	1	1	0.0136137
5730480H06Rik	-0.0260366	1	0.000411349	1	0.00458353	1	1	-0.00701391
5730559C18Rik	0.0365723	1	0.0592457	1	0.0749705	1	1	0.0569295
5930430L01Rik	0.0292827	1	0.0212319	1	-0.013945	1	1	0.0121899
6030458C11Rik	0.0283015	1	0.0495552	1	0.0734841	1	1	0.0504469
8030462N17Rik	0.012819	1	0.0319692	1	0.0210045	1	1	0.0219309
9030025P20Rik	-0.0414257	1	-0.0176494	1	-0.0436112	1	1	-0.0342288
9030624J02Rik	0.0202576	1	0.00716229	1	0.0371878	1	1	0.0215359
9130401M01Rik	0.0902662	1	0.0804594	1	0.0546674	1	1	0.075131
9230110C19Rik	0.015163	1	-0.00504124	1	-0.0211923	1	1	-0.00369016
9430015G10Rik	-0.00132633	1	-0.000918911	1	-0.00664037	1	1	-0.00296187
9430038I01Rik	-0.00602985	1	0.00671772	1	-0.0267957	1	1	-0.00870261
9530068E07Rik	0.0117679	1	0.0178322	1	0.0168803	1	1	0.0154935
9930021J03Rik	0.0548561	1	0.0488986	1	0.0703617	1	1	0.0580388
A230050P20Rik	-0.0170892	1	-0.01702	1	-0.00822128	1	1	-0.0141102
A330069E16Rik	-0.00646222	1	-0.0198876	1	-0.0187461	1	1	-0.015032
A430005L14Rik	-0.242773	1.49398e-14	-0.191292	2.1039e-10	-0.218357	0.0171636	9.45037e-23	-0.217474
A430105I19Rik	0.0488431	1	0.0400006	1	0.0544307	1	1	0.0477581
A630089N07Rik	-0.000638078	1	0.00569054	1	-0.028566	1	1	-0.00783784
AA467197	0.131528	1	0.0653891	1	0.13971	1	1	0.112209
Aaas	-0.00613727	1	0.0235009	1	0.0536034	1	1	0.0236557
Aacs	-0.0205774	1	-0.013958	1	0.0110932	1	1	-0.00781408
Aaed1	-0.0225198	1	0.0126623	1	0.0295328	1	1	0.00655845
Aak1	-0.0374228	1	-0.009625	1	-0.034086	1	1	-0.0270446
Aamdc	-0.0170876	1	-0.0241791	1	-0.0484326	1	1	-0.0298998
Aamp	-0.0693928	1	-0.0789768	1	-0.113385	1	1	-0.0872514
Aar2	0.0499207	1	0.0347515	1	0.022787	1	1	0.0358197
Aars	-0.0411186	1	-0.0483591	1	-0.125449	1	1	-0.0716423
Aasdhppt	0.0403896	1	0.00769003	1	-0.0340561	1	1	0.00467451
Aatf	0.00237415	1	0.0605519	1	0.0752748	1	1	0.0460669
Abca1	0.00249469	1	-0.0100832	1	-0.00719771	1	1	-0.00492874
Abca3	-0.0168993	1	0.0233557	1	-0.0437344	1	1	-0.012426
Abca5	-0.0175278	1	0.000633114	1	-0.0217664	1	1	-0.012887
Abcb10	-0.00943226	1	-0.0146984	1	-0.0108354	1	1	-0.0116553
Abcb7	0.0182155	1	0.00894051	1	-0.014451	1	1	0.004235
Abcb8	-0.00588721	1	0.0113776	1	0.036983	1	1	0.0141578
Abcb9	0.0780556	1	0.0426571	1	0.03217	1	1	0.0509609
Abcc1	0.0916569	1	0.0947158	1	0.185813	0.271868	0.85655	0.124062
Abcd3	-0.0164467	1	-0.00542666	1	-0.00998986	1	1	-0.0106211
Abcd4	0.0451936	1	0.0193685	1	0.0165986	1	1	0.0270536
Abce1	-0.065944	1	-0.0573929	1	-0.181673	1	1	-0.10167
Abcf1	-0.0397117	1	0.0364344	1	-0.152659	1	1	-0.0519786
Abcf2	-0.0560533	1	0.010065	1	-0.0522487	1	1	-0.0327456
Abcf3	0.0166637	1	0.0113276	1	0.0574733	1	1	0.0284882
Abcg2	0.00871811	1	-0.0188264	1	0.00919998	1	1	-0.000302762
Abhd10	-0.010881	1	-0.00756592	1	-0.0160233	1	1	-0.0114901
Abhd11	0.150934	0.00146038	0.0923492	1	0.15813	1	0.0421223	0.133805
Abhd12	0.0646146	1	0.0330381	1	0.0725998	1	1	0.0567508
Abhd13	-0.00949227	1	-0.01115	1	-0.00927017	1	1	-0.00997082
Abhd14a	0.0103668	1	-0.018357	1	-0.00896442	1	1	-0.00565155
Abhd16a	-0.0325038	1	-0.0268187	1	-0.0305477	1	1	-0.0299567
Abhd17a	0.0143641	1	-0.0321624	1	0.0152876	1	1	-0.000836868
Abhd17b	-0.05236	1	-0.000830793	1	-0.0787079	1	1	-0.0439662
Abhd17c	0.0112051	1	0.0149172	1	0.00804309	1	1	0.0113885
Abhd18	-0.00377249	1	-0.0145137	1	0.0145347	1	1	-0.0012505
Abhd2	-0.0837317	0.482457	-0.0477002	1	-0.121749	1	0.962253	-0.0843936
Abhd4	2.86807e-06	1	-0.0100236	1	0.00462972	1	1	-0.00179701
Abhd5	0.126998	1	0.108874	1	0.119343	1	1	0.118405
Abhd6	-0.0310306	1	-0.0200398	1	-0.0210085	1	1	-0.0240263
Abhd8	-0.138553	4.0475e-08	-0.0863289	0.00190462	-0.154786	0.0487893	1.40409e-09	-0.126556
Abi1	0.161491	0.00115538	0.127178	0.0824021	0.0721312	1	0.00505812	0.120267
Abi2	-0.0349088	1	-0.0103788	1	-0.0768048	1	1	-0.0406975
Abl1	0.0689731	1	0.034917	1	0.101616	1	1	0.0685019
Abl2	-0.00362485	1	-0.000810362	1	-0.0936209	1	1	-0.0326854
Abr	0.00301032	1	0.00242393	1	0.0395942	1	1	0.0150095
Abracl	-0.0237469	1	-0.0250319	1	0.0168449	1	1	-0.0106446
Abraxas1	0.0239579	1	0.000279263	1	-0.0050905	1	1	0.00638221
Abraxas2	-0.0101306	1	0.0153918	1	0.0223489	1	1	0.00920339
Abt1	0.0082499	1	0.0390976	1	0.0748912	1	1	0.0407462
AC127341.3	-0.103599	0.00436954	-0.0526889	1	-0.106435	1	0.0926009	-0.0875742
AC149090.1	0.0469094	1	0.0731511	1	0.0639772	1	1	0.0613459
AC160336.1	-0.258116	3.40661e-07	-0.229554	0.000468055	-0.6188	4.86815e-11	8.68884e-18	-0.368824
AC191865.2	0.0454631	1	0.023954	1	0.0813181	1	1	0.0502451
Acaa1a	-0.00312708	1	0.0117626	1	0.0401904	1	1	0.0162753
Acaa2	0.0168571	1	0.0459694	1	0.00544364	1	1	0.0227567
Acaca	0.0157745	1	0.00459635	1	0.0184722	1	1	0.0129477
Acad8	0.0130568	1	0.00669458	1	-0.0263719	1	1	-0.00220684
Acad9	0.0587814	1	0.00621864	1	-0.0669554	1	1	-0.00065178
Acadl	-0.04731	1	-0.0131597	1	-0.0889142	1	1	-0.0497946
Acadm	-0.131737	0.0304092	-0.100701	0.104801	-0.155071	1	0.0741675	-0.12917
Acads	0.0724449	1	0.0597745	1	0.153872	1	1	0.0953639
Acadsb	0.0220976	1	0.0110459	1	0.0331586	1	1	0.0221007
Acadvl	0.012228	1	-0.0153009	1	0.0104347	1	1	0.00245394
Acap1	0.141565	1.45603e-06	0.123469	1.37417e-08	0.176667	1.0121e-08	2.62954e-19	0.147234
Acap2	0.023559	1	0.0378746	1	0.00858384	1	1	0.0233391
Acap3	0.00778869	1	-0.0150868	1	-0.00176836	1	1	-0.00302216
Acat1	-0.0124038	1	0.019408	1	0.019793	1	1	0.0089324
Acat2	-0.00307049	1	-0.0247865	1	-0.0404952	1	1	-0.022784
Acbd3	-0.058337	1	0.00633376	1	-0.0675745	1	1	-0.0398593
Acbd4	0.0595734	1	0.0282491	1	0.0765454	1	1	0.0547893
Acbd5	0.120322	0.78943	0.0641932	1	0.0882794	1	0.998153	0.0909316
Acbd6	-0.0483675	1	0.0132703	1	0.0343733	1	1	-0.000241292
Acd	-0.0435576	1	-0.0408037	1	-0.0802879	1	1	-0.0548831
Acer3	-0.0365216	1	-0.0457286	1	-0.0608066	1	1	-0.0476856
Acin1	0.0127159	1	0.0102898	1	-0.0289863	1	1	-0.00199352
Acly	0.0753415	1	0.0524353	1	0.0588893	1	1	0.062222
Aco1	-0.0234391	1	-0.00130538	1	-0.0405353	1	1	-0.0217599
Aco2	0.0695671	1	0.0509893	1	0.0987794	1	1	0.0731119
Acot1	-0.0135592	1	-0.0292224	1	0.0229052	1	1	-0.00662547
Acot13	0.0577654	1	0.0455177	1	0.124157	1	1	0.0758135
Acot2	-0.0146702	1	-0.00904588	1	-0.0642667	1	1	-0.0293276
Acot7	-0.201097	3.88572e-11	-0.188463	3.69551e-08	-0.176098	0.334145	4.47576e-16	-0.188553
Acot8	0.0821395	0.0097387	0.0244743	1	0.0268626	1	0.159303	0.0444921
Acot9	0.164467	0.00025613	0.125824	0.212955	0.190678	0.477442	0.00175178	0.160323
Acox1	0.0249516	1	0.000324552	1	0.0604928	1	1	0.0285896
Acp1	0.0648826	1	0.0197485	1	0.0177799	1	1	0.034137
Acp2	0.0333562	1	0.0354731	1	0.0401614	1	1	0.0363302
Acp6	-0.03767	1	-0.0222214	1	0.0274636	1	1	-0.0108093
Acsbg1	-0.035093	1	-0.00634438	1	0.00280634	1	1	-0.012877
Acsl1	0.00102759	1	-0.00526813	1	0.00741434	1	1	0.00105793
Acsl3	0.0298001	1	0.0129933	1	0.026679	1	1	0.0231575
Acsl4	0.0381664	1	0.0227866	1	0.00584882	1	1	0.0222673
Acsl5	0.0231607	1	0.0299918	1	0.0490492	1	1	0.0340672
Acss2	0.0263592	1	0.0111753	1	0.0452466	1	1	0.0275937
Actb	0.106465	0.620026	0.0946625	0.186098	0.0892604	1	0.633598	0.0967959
Actg1	-0.269765	1.3199e-11	-0.254349	2.04946e-10	-0.293097	1.02485e-06	5.35563e-24	-0.272403
Actl6a	-0.0476365	1	-0.00493412	1	-0.0267907	1	1	-0.0264537
Actn1	0.108353	1	0.0856804	1	0.124355	1	1	0.106129
Actn4	-0.0340898	1	-0.0074227	1	-0.241182	0.0123916	0.186246	-0.0942316
Actr10	0.00395673	1	-0.0228993	1	0.00834144	1	1	-0.00353372
Actr1a	0.0235486	1	0.0324322	1	0.107672	1	1	0.0545511
Actr1b	-0.0280084	1	-0.0420653	1	-0.0746047	1	1	-0.0482262
Actr2	-0.0652097	1	-0.0379779	1	-0.0604838	1	1	-0.0545571
Actr3	-0.0483347	1	-0.0436588	1	-0.204246	0.0162169	0.220808	-0.0987467
Actr5	0.0240197	1	0.016789	1	0.0279348	1	1	0.0229145
Actr6	0.00882312	1	0.000372003	1	-0.0361465	1	1	-0.00898378
Actr8	-0.0115172	1	0.00485616	1	-0.0126257	1	1	-0.0064289
Acvr1	0.0801697	1	0.0422433	1	0.0667296	1	1	0.0630475
Acvr2a	0.0334922	1	0.0388787	1	0.0542534	1	1	0.0422081
Acy1	0.0235684	1	0.0125363	1	0.0263468	1	1	0.0208172
Acyp1	0.044424	1	0.02847	1	0.0393548	1	1	0.0374163
Acyp2	0.0476458	1	0.0270957	1	0.0282609	1	1	0.0343341
Ada	-0.0154449	1	0.01352	1	-0.0122875	1	1	-0.00473747
Adam10	0.0735586	1	0.021787	1	0.0322008	1	1	0.0425155
Adam15	-0.0635181	0.217483	-0.0376699	1	-0.0210551	1	0.802385	-0.0407477
Adam17	0.000429966	1	-0.0309292	1	-0.0758088	1	1	-0.035436
Adam9	-0.000748177	1	-0.0124818	1	-0.00328906	1	1	-0.00550636
Adamts1	-0.0444773	1	-0.0651341	1	-0.0950467	1	1	-0.0682194
Adamts4	-0.0410519	1	-0.0224576	1	0.0569033	1	1	-0.00220207
Adamtsl5	-0.0231925	1	-0.0261036	1	-0.0199176	1	1	-0.0230712
Adar	0.0217024	1	0.0322239	1	0.0494408	1	1	0.0344557
Adarb1	0.0238828	1	0.043864	1	0.0408267	1	1	0.0361912
Adat2	0.0178951	1	0.0262951	1	0.0559567	1	1	0.0333823
Adck1	0.0157259	1	0.00725226	1	0.00586992	1	1	0.00961604
Adck5	0.0178394	1	0.0123785	1	0.0543321	1	1	0.0281833
Adcy3	-0.016039	1	-0.018718	1	-0.0289934	1	1	-0.0212501
Adcy6	0.0134863	1	-0.00679718	1	0.0203858	1	1	0.00902496
Adcy7	0.0358653	1	0.0310161	1	0.0293781	1	1	0.0320865
Add1	0.0383564	1	0.0810512	1	0.0758724	1	1	0.0650933
Add3	-0.000956748	1	0.0176075	1	-0.031681	1	1	-0.00501007
Adgra3	-0.0341717	1	-0.0360982	1	-0.0548308	1	1	-0.0417002
Adgre5	-0.183545	5.01012e-09	-0.16843	1.03299e-11	-0.119883	1	5.33808e-17	-0.157286
Adgrl1	-0.0510077	0.0612413	-0.0514635	0.00308325	-0.0703259	1	0.00874955	-0.057599
Adgrl3	-0.049113	1	-0.0887829	0.540712	-0.0804068	1	0.97539	-0.0727676
Adh5	-0.12575	0.00379656	-0.144701	7.02177e-05	-0.117068	1	3.48456e-05	-0.129173
Adh7	-0.0901407	1.70703e-05	-0.0768742	0.000771329	-0.12294	0.00404548	1.6217e-08	-0.0966517
Adi1	-0.00721584	1	0.0306403	1	-0.0071266	1	1	0.0054326
Adipor1	-0.116225	0.0174622	-0.0555521	1	-0.166351	0.237551	0.0893025	-0.112709
Adipor2	0.0433817	1	0.00482698	1	0.0269624	1	1	0.025057
Adk	-0.143355	0.00260708	-0.0749988	1	-0.143836	1	0.0642591	-0.12073
Adm	-0.150958	1	-0.139493	1	-0.191734	1	1	-0.160729
Adnp	0.0619571	1	0.0513254	1	0.0724034	1	1	0.0618953
Ado	-0.00208673	1	0.00589579	1	-0.00727193	1	1	-0.00115429
Adpgk	0.0297831	1	0.0225408	1	0.0410948	1	1	0.0311396
Adprh	-0.0482746	1	-0.0344021	1	-0.0408287	1	1	-0.0411685
Adprhl2	-0.0702037	0.107122	-0.0366882	1	-0.056908	1	0.613669	-0.0546
Adprm	-0.00488857	1	-0.00021707	1	0.00301439	1	1	-0.000697082
Adrb2	0.00128015	1	0.00188382	1	0.0170592	1	1	0.00674106
Adrm1	0.187945	1.7834e-05	0.119396	1	0.195263	0.111586	0.000199581	0.167535
Adsl	0.00386786	1	0.0125059	1	-0.0190063	1	1	-0.000877486
Adss	0.0151548	1	0.0340558	1	-0.000766896	1	1	0.0161479
Adssl1	0.210518	5.30641e-08	0.11343	1	0.280687	9.22227e-06	2.1096e-10	0.201545
Aebp1	0.46499	2.13583e-35	0.356345	2.25867e-27	0.593904	1.71053e-28	1.75299e-85	0.471746
Aebp2	0.0112076	1	0.00824251	1	-0.0339069	1	1	-0.00481891
Aen	-0.0345798	1	-0.0183109	1	0.00455834	1	1	-0.0161108
Aes	-0.0984828	1	-0.0490609	1	-0.095158	1	1	-0.0809006
Afap1	0.0311671	1	0.0942683	1	0.0822292	1	1	0.0692215
Afdn	-0.0977308	1	-0.0477834	1	-0.194179	0.771117	0.997589	-0.113231
Aff1	0.0481614	1	0.0425524	1	0.0699808	1	1	0.0535649
Aff4	0.0508954	1	0.0284707	1	0.0653069	1	1	0.0482243
Afg3l1	0.0132086	1	0.0174081	1	-0.0352228	1	1	-0.00153536
Afg3l2	0.0629874	1	0.0846171	1	0.081859	1	1	0.0764878
Afp	-0.0176597	1	0.0100485	1	0.0398441	1	1	0.0107443
Aftph	0.0372838	1	0.0574306	1	0.0576981	1	1	0.0508041
Aga	0.00230923	1	-0.026896	1	-0.0366494	1	1	-0.0204121
Agap1	-0.00373374	1	-0.0136288	1	-0.000663349	1	1	-0.00600864
Agap3	0.00126981	1	0.0187429	1	0.0692648	1	1	0.0297592
Agbl3	0.0340286	1	0.0141423	1	0.0537653	1	1	0.0339787
Agfg1	-0.0554422	1	-0.0847435	1	-0.0759798	1	1	-0.0720552
Agfg2	0.0322263	1	0.0386614	1	0.046622	1	1	0.0391699
Aggf1	-0.0308498	1	-0.00935487	1	0.0291884	1	1	-0.00367209
Agk	0.00749016	1	0.0146827	1	-0.0132357	1	1	0.00297907
Agl	-0.0100376	1	-0.0164238	1	-0.00852518	1	1	-0.0116622
Ago1	-0.042281	1	-0.0337226	1	-0.0401199	1	1	-0.0387079
Ago2	0.0115815	1	0.0105455	1	-0.0474275	1	1	-0.00843352
Ago3	-0.0186405	1	-0.0228831	1	-0.0435951	1	1	-0.0283729
Agpat1	-0.0740185	0.818645	-0.0470169	1	-0.0828034	1	0.99885	-0.0679463
Agpat2	0.0619458	1	0.0780223	1	0.0799464	1	1	0.0733048
Agpat3	-0.0528705	1	-0.0129669	1	-0.0772365	1	1	-0.0476913
Agpat4	-0.105596	0.00831071	-0.0637018	1	-0.10504	1	0.14347	-0.0914458
Agpat5	-0.0460026	1	-0.0422669	1	-0.0572602	1	1	-0.0485099
Agps	0.0357389	1	0.0438305	1	0.0457015	1	1	0.041757
Agrn	-0.106083	0.00304577	-0.12259	0.000315102	-0.128204	1	0.000106395	-0.118959
Agtpbp1	0.0166516	1	0.0349286	1	0.0126286	1	1	0.0214029
Agtrap	-0.0321005	1	-0.0485954	0.541357	-0.0506583	1	0.975512	-0.0437847
Ahctf1	-0.0542257	1	-0.015937	1	-0.119193	1	1	-0.0631186
Ahcyl1	0.0774483	1	0.0737375	1	0.0374235	1	1	0.0628698
Ahcyl2	-0.0103185	1	-0.0209248	1	-0.0514802	1	1	-0.0275745
Ahdc1	-0.02225	1	-0.035328	1	-0.0359443	1	1	-0.0311741
Ahi1	-0.114722	0.000147965	-0.0994474	0.0064017	-0.132657	0.66918	7.42308e-05	-0.115609
Ahnak	0.284569	0.000176713	0.291764	3.98611e-10	0.398555	5.31267e-06	3.53101e-16	0.324963
Ahnak2	0.173904	0.307972	0.114197	1	0.224943	1	0.884277	0.171015
Ahr	0.178199	1	0.0463535	1	-0.0397552	1	1	0.061599
Ahsa1	0.00310323	1	0.0175184	1	0.015166	1	1	0.0119292
Ahsa2	-0.0450406	1	-0.0401317	1	-0.00996411	1	1	-0.0317121
AI314180	-0.0837523	1	-0.0845647	1	-0.104659	1	1	-0.090992
AI413582	-0.0861704	1	-0.0946297	1	-0.117195	1	1	-0.0993318
AI467606	0.0142226	1	0.00894199	1	0.0209814	1	1	0.0147153
AI597479	-0.00628971	1	0.0123246	1	0.0229413	1	1	0.00965873
AI606181	-0.0118676	1	0.0135336	1	0.0362793	1	1	0.0126484
AI837181	0.0521376	1	0.0293555	1	0.0509455	1	1	0.0441462
Aida	0.120104	1	0.0775007	1	0.0284048	1	1	0.0753365
Aif1l	0.0831856	3.77249e-06	0.0599624	0.0131289	0.0809979	0.109282	1.08897e-06	0.0747153
Aifm1	0.132537	0.064417	0.12132	0.290636	0.099161	1	0.241336	0.117673
Aifm2	0.00351162	1	-0.00465375	1	0.0197844	1	1	0.0062141
Aig1	-0.220146	3.66102e-08	-0.162657	0.000491223	-0.220954	0.0224939	1.76652e-10	-0.201253
Aim2	0.039275	1	0.0242716	1	0.0474359	1	1	0.0369942
Aimp1	-0.154557	1.35025e-06	-0.136248	9.89438e-06	-0.190135	0.00365255	2.44669e-11	-0.160313
Aimp2	-0.0339703	1	0.0239122	1	-0.0556316	1	1	-0.0218966
Aip	0.0407227	1	0.0269529	1	0.15084	0.676523	0.992559	0.0728385
Ajuba	-0.00333477	1	-0.0181357	1	-0.0151233	1	1	-0.0121979
Ak2	-0.131554	1	-0.0841094	1	-0.124818	1	1	-0.113494
Ak4	-0.0613241	0.0376727	-0.106	0.00155007	-0.0624507	1	0.00340228	-0.0765917
Ak6	0.0383361	1	0.0830109	1	0.0710537	1	1	0.0641336
Akap1	0.0130696	1	0.00640611	1	-0.0285789	1	1	-0.00303442
Akap10	0.0131207	1	0.027185	1	0.0186503	1	1	0.019652
Akap11	-0.0152253	1	-0.0144667	1	-0.0909724	1	1	-0.0402215
Akap12	-0.0741544	1.082e-05	-0.0539126	0.0765426	-0.0833955	1	9.36355e-05	-0.0704875
Akap13	-0.101586	0.0140956	-0.100097	0.0217921	-0.0400905	1	0.0128388	-0.0805909
Akap7	0.00146139	1	0.004224	1	0.00115387	1	1	0.00227975
Akap8	-0.03158	1	-0.0272968	1	-0.0203074	1	1	-0.0263947
Akap8l	-0.0120668	1	0.00195434	1	-0.0257544	1	1	-0.0119556
Akap9	0.0613532	1	0.0847272	1	0.134376	1	1	0.0934856
Akip1	0.0276507	1	0.0411751	1	0.0501325	1	1	0.0396528
Akirin1	-0.12498	1.14825e-05	-0.0852031	0.0474124	-0.111423	1	6.50261e-05	-0.107202
Akirin2	-0.188657	1.80925e-06	-0.116389	0.157122	-0.155813	1	3.68635e-05	-0.15362
Akr1a1	-0.316785	1.78912e-24	-0.27513	8.15967e-19	-0.384656	8.31933e-14	9.86422e-52	-0.325524
Akr1b10	0.0590858	1	0.0434901	1	0.012915	1	1	0.038497
Akr1b3	-0.277455	9.20456e-14	-0.166541	0.000104485	-0.321371	4.45456e-08	6.98853e-22	-0.255122
Akr1b8	0.0638369	1	0.00219321	1	0.0677124	1	1	0.0445808
Akr1c12	0.100504	8.65704e-25	0.090343	2.53661e-08	0.0737945	1.4363e-08	1.33364e-36	0.0882139
Akr1c13	0.121998	7.39035e-21	0.0909513	3.91931e-08	0.137979	1.70986e-11	1.9706e-35	0.116976
Akr1c18	0.574334	1.32256e-10	0.323006	3.25233e-06	0.463183	1	2.849e-13	0.453508
Akr1e1	0.0294511	1	0.039608	1	0.0463124	1	1	0.0384572
Akr7a5	-0.0356548	1	-0.0334955	1	0.0453443	1	1	-0.00793534
Akt1	-0.0495686	1	-0.0345938	1	-0.0761232	1	1	-0.0534285
Akt1s1	-0.0331061	1	0.00316381	1	0.00874259	1	1	-0.00706656
Akt2	-0.00395596	1	0.0119591	1	-0.0375399	1	1	-0.00984558
Akt3	-0.0329729	1	-0.00484088	1	-0.0507695	1	1	-0.0295278
Aktip	-0.0383792	1	-0.0319325	1	-0.0957979	1	1	-0.0553699
Alad	-0.119942	0.438763	-0.069951	1	-0.226862	0.00144911	0.0225396	-0.138918
Alas1	0.0275025	1	0.0210288	1	-0.0111472	1	1	0.0124614
Aldh16a1	-0.00170425	1	0.0303937	1	1.19944e-05	1	1	0.00956715
Aldh18a1	-0.00265854	1	-0.0110943	1	-0.0172169	1	1	-0.0103232
Aldh1l2	0.00813959	1	-0.00294795	1	-0.0260008	1	1	-0.0069364
Aldh2	0.323054	7.0854e-18	0.244738	1.86026e-13	0.317383	5.10368e-07	2.39001e-33	0.295058
Aldh3a2	-0.00122331	1	0.0117725	1	-0.0144277	1	1	-0.00129285
Aldh5a1	-0.020191	1	0.00425532	1	0.0311016	1	1	0.00505531
Aldh7a1	0.112265	0.192439	0.103376	1	0.100598	1	0.77089	0.105413
Aldh9a1	-0.0417686	1	-0.0228516	1	0.0135655	1	1	-0.0170182
Aldoa	-0.058359	1	-0.167634	0.00163495	-0.0532139	1	0.045778	-0.093069
Alg1	0.0118636	1	-0.000913192	1	0.00429234	1	1	0.00508092
Alg10b	-0.00534252	1	-0.00418406	1	0.000562411	1	1	-0.00298806
Alg11	-0.00323313	1	0.0012022	1	0.00777636	1	1	0.00191514
Alg13	0.009496	1	0.0188853	1	0.0516533	1	1	0.0266782
Alg14	0.00953894	1	0.00114419	1	0.0478286	1	1	0.0195039
Alg2	-0.0114779	1	-0.0225629	1	-0.0116513	1	1	-0.0152307
Alg3	0.0251765	1	0.0341638	1	0.0498207	1	1	0.036387
Alg5	0.0712357	1	0.0121381	1	0.0656926	1	1	0.0496888
Alg6	-0.0086962	1	-0.00788447	1	-0.0061075	1	1	-0.00756272
Alg8	0.00967177	1	0.020405	1	0.0175109	1	1	0.0158626
Alg9	-0.00127374	1	0.0178455	1	0.0277078	1	1	0.0147599
Alkbh1	0.0202062	1	0.0282459	1	0.0634934	1	1	0.0373152
Alkbh2	0.0528194	1	0.0208821	1	0.107603	1	1	0.0604349
Alkbh3	0.14571	3.61572e-05	0.0901618	1	0.152708	1	0.00229706	0.129527
Alkbh5	-0.123199	0.00840902	-0.106711	0.444868	-0.079245	1	0.0830619	-0.103052
Alkbh6	0.00341438	1	0.0164074	1	0.0236776	1	1	0.0144998
Alkbh7	-0.00554036	1	-0.0203392	1	-0.00160475	1	1	-0.00916145
Alkbh8	0.0282924	1	0.0290369	1	0.0110874	1	1	0.0228055
Alms1	-0.0231859	1	0.0253895	1	0.0186583	1	1	0.00695397
Alyref	-0.23002	1.10257e-07	-0.101196	1	-0.261426	0.000388743	1.328e-08	-0.197548
Amd1	-0.0676795	1	0.00831771	1	-0.0668349	1	1	-0.0420656
Amd2	-0.0161314	1	-0.00206219	1	-0.00960878	1	1	-0.00926744
Amer1	0.0470673	1	0.0327397	1	0.0726568	1	1	0.0508213
Amfr	-0.0469044	1	-0.0182826	1	-0.0744855	1	1	-0.0465575
Ammecr1	-0.00368383	1	0.0337666	1	0.0544798	1	1	0.0281875
Ammecr1l	0.0171036	1	0.0297998	1	0.0580496	1	1	0.0349843
Amn1	-0.0035883	1	0.00589355	1	0.059982	1	1	0.0207624
Amot	0.0681468	1	0.0433602	1	0.0278252	1	1	0.0464441
Amotl1	-0.0169048	1	-0.0258594	1	-0.105844	1	1	-0.049536
Amotl2	-0.0440324	1	-0.0259579	1	-0.0262257	1	1	-0.032072
Ampd2	-0.0432571	1	-0.0238197	1	0.00143147	1	1	-0.0218818
Amz2	-0.0124177	1	-0.00577896	1	-0.0757975	1	1	-0.0313314
Anapc1	0.0708899	1	0.0713463	1	0.0281081	1	1	0.0567814
Anapc10	0.0320066	1	-0.0263146	1	0.0306257	1	1	0.0121059
Anapc11	-0.142608	0.00538276	-0.0313959	1	-0.0839366	1	0.106969	-0.08598
Anapc13	0.00698009	1	0.0229351	1	0.0372119	1	1	0.0223757
Anapc15	-0.00467451	1	0.0169875	1	0.0108692	1	1	0.00772741
Anapc16	-0.0624617	1	-0.0754732	1	-0.11487	1	1	-0.0842682
Anapc2	0.110545	1	0.0895455	1	0.139194	1	1	0.113095
Anapc4	0.0214803	1	0.0342253	1	0.0155627	1	1	0.0237561
Anapc5	0.023834	1	0.0465587	1	0.0276552	1	1	0.0326826
Anapc7	-0.0127204	1	-0.0264472	1	-0.0487166	1	1	-0.0292947
Angel2	-0.0299188	1	-0.00151233	1	-0.0955029	1	1	-0.0423114
Angpt1	-0.0960722	0.000390792	-0.0655415	0.986986	-0.19691	0.00990219	0.000348681	-0.119508
Angpt2	0.0115286	1	-0.00801492	1	0.000904335	1	1	0.00147268
Angptl2	0.123224	0.0928722	0.0841152	1	0.0829657	1	0.575852	0.0967684
Angptl4	-0.0373294	1	0.00696888	1	0.0966197	1	1	0.0220864
Ank	-0.200087	4.44077e-08	-0.124257	0.657619	-0.339402	3.89602e-06	5.40393e-11	-0.221248
Ankfy1	0.0196371	1	0.014364	1	0.00250264	1	1	0.0121679
Ankhd1	0.0753387	1	0.104328	0.562184	-0.000765025	1	0.979196	0.0596339
Ankib1	0.0241179	1	0.0305657	1	0.0105875	1	1	0.0217571
Ankle2	0.0109548	1	0.0375939	1	-0.0051607	1	1	0.0144627
Ankmy1	0.00639202	1	0.0114801	1	-0.0272651	1	1	-0.003131
Ankmy2	0.0171864	1	0.00742917	1	0.0415479	1	1	0.0220545
Ankra2	0.0514591	1	0.0420106	1	0.0524811	1	1	0.0486503
Ankrd1	0.107405	1	0.149636	1	0.306722	0.0471492	0.411105	0.187921
Ankrd10	0.0110483	1	0.0460996	1	0.0291439	1	1	0.0287639
Ankrd11	-0.0593335	1	-0.0244651	1	-0.118418	1	1	-0.0674055
Ankrd12	0.00381353	1	0.0469206	1	0.00672031	1	1	0.0191515
Ankrd13a	-0.048891	1	-0.004097	1	-0.0236814	1	1	-0.0255565
Ankrd13b	-0.0103373	1	0.022681	1	-0.00893531	1	1	0.00113613
Ankrd13c	-0.104504	2.93989e-05	-0.0548102	1	-0.112576	1	0.00193664	-0.09063
Ankrd16	0.038254	1	0.0198877	1	0.0241079	1	1	0.0274165
Ankrd17	-0.0304396	1	0.0167943	1	0.0174142	1	1	0.00125632
Ankrd24	0.0353633	1	0.00483728	1	0.00982228	1	1	0.0166743
Ankrd26	-0.00822698	1	0.050875	1	0.00225733	1	1	0.0149685
Ankrd27	0.00447575	1	0.00722643	1	-0.013396	1	1	-0.000564611
Ankrd28	-0.0190034	1	0.0113154	1	0.0185595	1	1	0.00362384
Ankrd29	-0.0288438	1	-0.0241717	1	-0.0175263	1	1	-0.0235139
Ankrd37	-0.505064	1.20131e-10	-0.535593	4.29831e-15	-0.583634	3.5879e-07	4.77152e-28	-0.54143
Ankrd39	0.00299341	1	0.0122295	1	-0.0144521	1	1	0.000256949
Ankrd40	0.0763318	1	0.0565035	1	0.0945199	1	1	0.0757851
Ankrd44	-0.00972133	1	-0.0518931	1	0.0373089	1	1	-0.00810183
Ankrd49	0.0382686	1	0.0306478	1	0.0932051	1	1	0.0540405
Ankrd50	-0.0126066	1	-0.0130992	1	0.0774245	1	1	0.0172396
Ankrd52	0.00045774	1	0.00714036	1	-0.000669152	1	1	0.00230965
Ankrd54	-0.0208927	1	-0.0111777	1	-0.0216978	1	1	-0.0179228
Ankrd9	-0.0726891	1	-0.0579868	1	-0.0808176	1	1	-0.0704978
Anks1	-0.00690418	1	-0.00633627	1	0.000430697	1	1	-0.00426992
Anks1b	-0.0733786	0.00017548	-0.0816767	1.42231e-05	-0.0779013	1	5.41601e-07	-0.0776522
Ankzf1	0.0215815	1	0.00304311	1	0.00527469	1	1	0.00996643
Anln	-0.0197636	1	0.0956678	1	-0.204661	1	1	-0.0429189
Ano10	0.0981123	1	0.0795338	1	0.110349	1	1	0.0959983
Ano6	0.019214	1	0.0463712	1	0.0302977	1	1	0.031961
Ano8	0.0410033	1	0.031802	1	0.0549632	1	1	0.0425895
Anp32a	0.0723847	1	0.092464	1	0.176744	0.684894	0.993178	0.113864
Anp32b	-0.38428	8.16779e-22	-0.221318	8.69543e-08	-0.475791	1.22826e-18	4.99935e-43	-0.360463
Anp32e	-0.0639926	1	0.0302515	1	-0.00649922	1	1	-0.0134134
Antxr1	-0.00752991	1	0.00381504	1	-0.0323243	1	1	-0.012013
Antxr2	-0.0280674	1	-0.0245714	1	-0.00141995	1	1	-0.0180196
Anxa1	0.0930071	1	0.0200474	1	0.0780223	1	1	0.0636923
Anxa11	-0.0740768	0.895263	-0.0698313	1	-0.0900822	1	0.999792	-0.0779968
Anxa2	-0.0505743	1	-0.103632	1	-0.0845957	1	1	-0.0796008
Anxa3	-0.0285443	1	-0.0644261	1	-0.0842133	1	1	-0.0590613
Anxa4	0.183156	2.61647e-08	0.14179	0.0737156	0.267268	8.94051e-05	7.97081e-11	0.197405
Anxa5	-0.0448138	1	-0.10118	1	-0.107063	1	1	-0.0843522
Anxa6	-0.177184	3.22915e-15	-0.0891794	8.59494e-05	-0.303862	2.30051e-11	1.48623e-26	-0.190075
Anxa7	0.0755522	1	-0.00112808	1	0.0532789	1	1	0.0425677
Anxa8	-0.0551891	1	-0.0108236	1	-0.0511024	1	1	-0.0390384
Aox1	0.0184763	1	-0.0150762	1	-0.0337491	1	1	-0.0101163
Ap1ar	-0.00197405	1	0.0629695	1	0.0707705	1	1	0.043922
Ap1b1	0.0243859	1	0.0332912	1	0.0443777	1	1	0.0340183
Ap1g1	0.0102319	1	-0.012033	1	-0.028562	1	1	-0.010121
Ap1m1	-0.071037	1	-0.00418205	1	-0.0536701	1	1	-0.0429631
Ap1s1	0.058019	1	0.0487512	1	0.0548623	1	1	0.0538775
Ap1s2	-0.134899	1.33189e-10	-0.0521833	1	-0.0652142	1	3.75961e-08	-0.0840988
Ap2a1	0.0113667	1	0.0296173	1	0.00738461	1	1	0.0161229
Ap2a2	0.0423523	1	0.0421629	1	0.0531357	1	1	0.0458836
Ap2b1	0.0263394	1	0.0681143	1	0.130202	1	1	0.0748852
Ap2m1	0.0269541	1	-0.0146946	1	0.0116306	1	1	0.00796334
Ap2s1	-0.0410515	1	0.00476861	1	-0.0223032	1	1	-0.0195287
Ap3b1	0.0763186	1	0.044352	1	0.181801	0.0162327	0.220942	0.100824
Ap3d1	-0.0246117	1	0.0229705	1	-0.048579	1	1	-0.01674
Ap3m1	-0.00340693	1	0.00490905	1	-0.0586416	1	1	-0.0190465
Ap3s1	0.156144	0.0236369	0.124611	1	0.127983	1	0.277905	0.136246
Ap3s2	-0.0100754	1	-0.00129371	1	-0.0236908	1	1	-0.0116866
Ap4m1	0.0453104	1	0.0387379	1	0.0155916	1	1	0.0332133
Ap4s1	-0.0810767	0.094193	-0.0655558	1	-0.102798	1	0.57956	-0.0831435
Apaf1	-0.0107271	1	0.00808407	1	-0.0166204	1	1	-0.00642117
Apba3	-0.00881838	1	-0.0191247	1	-0.0227833	1	1	-0.0169088
Apbb1	-0.0148943	1	-0.0202697	1	-0.0301785	1	1	-0.0217808
Apbb1ip	-0.052787	0.391418	-0.0473765	1	-0.0428919	1	0.930746	-0.0476851
Apbb2	0.11442	1	0.128272	1	0.242024	0.163564	0.727794	0.161572
Apc	0.0496128	1	0.0917616	1	0.0967264	1	1	0.0793669
Apeh	0.0326653	1	0.00984898	1	0.115345	1	1	0.0526198
Apex1	0.0842877	1	0.0939381	1	0.0952219	1	1	0.0911492
Apex2	0.00447895	1	0.0297354	1	0.0325217	1	1	0.0222453
Aph1a	-0.0160955	1	-0.0033574	1	0.0814855	1	1	0.0206775
Aph1b	-0.000782398	1	-0.00959284	1	0.0326099	1	1	0.00741154
Api5	0.150174	0.078033	0.121838	0.190199	0.101191	1	0.208878	0.124401
Apip	0.208199	1.92428e-08	0.144853	0.000837707	0.193365	0.000566503	5.07593e-12	0.182139
Aplf	0.00204886	1	-0.0195629	1	0.0357321	1	1	0.00607269
Aplp2	0.118111	1	0.153694	0.0244699	0.264829	0.914671	0.268977	0.178878
Apmap	0.0354554	1	0.0305506	1	0.0415175	1	1	0.0358412
Apobec3	0.0163822	1	0.0117519	1	0.016667	1	1	0.0149337
Apobr	0.138334	1.10847e-10	0.114819	5.5148e-06	0.165773	0.0035985	1.90984e-15	0.139642
Apoe	-0.0248846	1	0.0751367	1	-0.0339037	1	1	0.00544948
Apol10b	-0.0566672	0.122712	-0.0315798	1	-0.00644153	1	0.650194	-0.0315629
Apol9a	0.0184084	1	-0.0131999	1	0.0171779	1	1	0.00746214
Apol9b	-0.0985227	1	-0.0087867	1	-0.0156463	1	1	-0.0409852
Apoo	0.0751389	1	0.102467	1	0.0839626	1	1	0.0871895
Apool	0.278131	1.68513e-25	0.217877	1.58431e-15	0.384003	3.72892e-17	8.40618e-53	0.293337
Apopt1	-0.0367931	1	-0.039612	1	0.00162162	1	1	-0.0249278
App	-0.158374	0.0020541	-0.150802	0.00423561	-0.238892	0.00526887	7.36534e-06	-0.18269
Appbp2	-0.0290559	1	0.00987001	1	-0.012526	1	1	-0.0105706
Appl1	-0.0695518	1	-0.0199797	1	-0.0264158	1	1	-0.0386491
Appl2	-0.0239745	1	-0.0394698	1	0.000707005	1	1	-0.0209125
Aprt	-0.0627857	1	-0.0640764	1	-0.149612	0.687193	0.993341	-0.0921581
Aptx	0.0020791	1	-0.024569	1	-0.0351456	1	1	-0.0192118
Aqp5	-0.312322	1.55251e-06	-0.227181	0.00465682	-0.778207	2.85197e-21	4.63608e-26	-0.439237
Aqr	0.0483752	1	0.0874931	1	0.12094	1	1	0.0856027
Araf	0.0879418	1	0.0700082	1	0.10479	1	1	0.0875801
Arcn1	-0.05816	1	-0.0209853	1	-0.152311	1	1	-0.0771522
Areg	-0.311888	3.08947e-06	-0.207262	0.000459395	-0.316582	0.301817	1.0933e-07	-0.278577
Arel1	0.0106408	1	0.011872	1	0.0165479	1	1	0.0130202
Arf1	-0.169529	2.88093e-08	-0.163493	2.20866e-08	-0.155536	0.563225	2.39755e-13	-0.162853
Arf2	0.0334658	1	0.0220935	1	0.0808869	1	1	0.0454821
Arf3	0.0178218	1	0.00137791	1	0.0251218	1	1	0.0147738
Arf4	-0.111589	0.212158	-0.098101	0.560083	-0.0594626	1	0.641512	-0.0897174
Arf5	-0.0221783	1	-0.0505896	1	0.0120265	1	1	-0.0202471
Arf6	0.0833607	1	0.000159889	1	0.0351856	1	1	0.0395688
Arfgap1	0.00267673	1	0.000853371	1	0.0224971	1	1	0.00867575
Arfgap2	0.0334735	1	0.0456446	1	0.0680659	1	1	0.0490613
Arfgap3	0.00261873	1	0.0152836	1	0.00679581	1	1	0.00823272
Arfgef1	-0.0201442	1	0.0298403	1	-0.0596473	1	1	-0.0166504
Arfip1	-0.0535845	1	-0.0238526	1	-0.0788257	1	1	-0.0520876
Arfip2	-0.04175	1	-0.0233054	1	-0.0390092	1	1	-0.0346882
Arfrp1	0.0949193	1	0.0990806	1	0.095909	1	1	0.0966363
Arglu1	0.0891271	1	0.137601	1	0.118947	1	1	0.115225
Arhgap1	0.0540662	1	0.0491956	1	0.0664108	1	1	0.0565575
Arhgap10	-0.189068	1.37648e-06	-0.150949	0.0004142	-0.271104	9.55346e-06	3.1221e-12	-0.203707
Arhgap11a	0.0582368	1	0.0603575	1	0.00589938	1	1	0.0414979
Arhgap12	0.0598944	1	0.0538095	1	0.0513974	1	1	0.0550338
Arhgap17	0.0264831	1	0.0308093	1	0.0504011	1	1	0.0358978
Arhgap18	-0.0151762	1	-0.0106777	1	-0.0595016	1	1	-0.0284519
Arhgap19	0.000410597	1	0.0210828	1	-0.00963304	1	1	0.00395346
Arhgap21	0.0635787	1	0.075508	1	0.0858195	1	1	0.0749687
Arhgap22	-0.0771973	0.0327011	-7.02584e-05	1	-0.00515344	1	0.335832	-0.0274737
Arhgap23	0.293816	1.11632e-10	0.219942	4.27126e-08	0.361047	1.53708e-07	1.17318e-21	0.291602
Arhgap29	-0.0829033	3.84691e-07	-0.0882153	2.51171e-09	-0.108375	0.0361124	2.64098e-14	-0.0931644
Arhgap31	-0.0337335	1	-0.0389185	1	-0.0488357	1	1	-0.0404959
Arhgap35	0.0229285	1	0.0374722	1	0.0436572	1	1	0.034686
Arhgap42	-0.206392	0.000543202	-0.207117	2.46568e-05	-0.255327	0.00154677	6.79891e-09	-0.222945
Arhgap5	0.0120013	1	-0.0372898	1	-0.094185	1	1	-0.0398245
Arhgdia	-0.277805	3.0812e-22	-0.18008	2.40328e-09	-0.29409	1.10263e-09	3.38137e-36	-0.250658
Arhgdib	-0.0157064	1	-0.167873	4.54001e-05	-0.307308	2.94102e-07	4.5334e-09	-0.163629
Arhgef1	0.0476524	1	0.0250503	1	0.0337797	1	1	0.0354941
Arhgef10l	-0.0363556	1	0.0137241	1	-0.0120794	1	1	-0.0115703
Arhgef11	0.00474254	1	0.00971243	1	0.017468	1	1	0.010641
Arhgef12	-0.0671177	1	-0.040739	1	-0.0533714	1	1	-0.0537427
Arhgef17	-0.0116301	1	-0.0189263	1	-0.0240221	1	1	-0.0181928
Arhgef18	-0.0148725	1	-0.00895238	1	0.0135975	1	1	-0.00340912
Arhgef2	0.0444914	1	0.022166	1	0.070549	1	1	0.0457355
Arhgef25	-0.00176711	1	-0.00809421	1	-0.00684303	1	1	-0.00556811
Arhgef28	0.0177969	1	0.0252251	1	0.0683214	1	1	0.0371145
Arhgef40	-0.00214592	1	-0.000286818	1	-0.0150998	1	1	-0.00584418
Arhgef5	-0.0602868	1	-0.0107185	1	-0.0524232	1	1	-0.0411429
Arhgef7	0.0325402	1	0.0153695	1	0.0111752	1	1	0.0196949
Arid1a	-0.00935946	1	-0.0208461	1	-0.0750309	1	1	-0.0350788
Arid1b	-0.0293668	1	-0.0155739	1	-0.0183655	1	1	-0.0211021
Arid2	-0.0253119	1	-0.00323745	1	0.0326585	1	1	0.0013697
Arid4a	0.039623	1	0.0531953	1	0.0910373	1	1	0.0612852
Arid4b	0.101434	1	0.117321	1	0.154853	1	1	0.124536
Arid5a	-0.0655806	0.536793	-0.0738893	1	-0.0710396	1	0.974641	-0.0701699
Arid5b	0.0134485	1	-0.0806196	1	-0.0512184	1	1	-0.0394632
Arih1	0.0303525	1	0.0371658	1	-0.0524151	1	1	0.0050344
Arih2	0.0274758	1	0.00604125	1	-0.0121174	1	1	0.00713323
Arl1	-0.0594922	1	-0.0623326	1	-0.12411	1	1	-0.0819784
Arl13b	-0.00654645	1	-0.0344783	1	2.44207e-05	1	1	-0.0136668
Arl14ep	0.0396184	1	0.0466988	1	0.0694331	1	1	0.0519168
Arl16	-0.0563576	1	-0.0521011	0.588091	-0.0595258	1	0.983163	-0.0559948
Arl2	0.123035	0.0369681	0.10166	1	0.21489	0.161954	0.115048	0.146528
Arl2bp	-0.172647	1.19581e-08	-0.127939	0.00129979	-0.163947	0.142518	8.59287e-10	-0.154844
Arl3	0.00992605	1	0.000515885	1	0.0429544	1	1	0.0177988
Arl4a	0.0440359	1	0.0189772	1	-0.0578809	1	1	0.00171072
Arl4c	-0.0789222	1	-0.00527527	1	-0.000878199	1	1	-0.0283585
Arl5a	0.0340237	1	0.0854063	1	0.086908	1	1	0.0687793
Arl5b	0.0441912	1	0.0299161	1	0.011888	1	1	0.0286651
Arl6	-0.0509835	1	-0.0479092	1	-0.022139	1	1	-0.0403439
Arl6ip1	0.018401	1	0.0999617	1	0.0817697	1	1	0.0667108
Arl6ip4	-0.0272969	1	0.0187495	1	-0.0218326	1	1	-0.0101267
Arl6ip5	-0.0274188	1	-0.0455464	1	-0.113626	1	1	-0.062197
Arl6ip6	0.118243	0.35942	0.0847968	1	0.189126	0.109694	0.372992	0.130722
Arl8a	0.00758618	1	0.0583419	1	0.0763429	1	1	0.0474237
Arl8b	0.0390497	1	0.0108742	1	-0.0493364	1	1	0.000195845
Armc1	-0.0103633	1	0.0208933	1	-0.0160591	1	1	-0.00184305
Armc10	0.00362841	1	0.0106528	1	-0.0205559	1	1	-0.00209155
Armc6	0.000673241	1	-0.0228468	1	0.019946	1	1	-0.000742524
Armc8	0.0600689	1	0.0549693	1	0.0496499	1	1	0.054896
Armcx5	0.0387446	1	0.0111157	1	0.0343084	1	1	0.0280562
Armt1	0.00431026	1	-0.00333291	1	-0.0306079	1	1	-0.00987684
Arnt	-0.0068638	1	-0.0313755	1	-0.0140875	1	1	-0.0174423
Arntl	-0.0172187	1	-0.0153177	1	-0.000772904	1	1	-0.0111031
Arpc1a	-0.113536	0.0982886	-0.088577	1	0.0115847	1	0.590783	-0.0635093
Arpc1b	0.0702551	1	0.0315616	1	0.0299072	1	1	0.0439079
Arpc2	-0.0987834	0.315088	-0.0888381	0.0603335	-0.187968	9.46724e-05	0.000183064	-0.125196
Arpc3	0.0400277	1	0.0137607	1	0.063469	1	1	0.0390858
Arpc4	-0.0926554	0.638354	-0.0798926	1	-0.0838387	1	0.989194	-0.0854622
Arpc5	-0.0967056	0.251565	-0.0602228	1	-0.120126	1	0.838297	-0.0923514
Arpc5l	0.101882	1	0.0667675	1	0.0436476	1	1	0.0707657
Arpin	0.00387253	1	0.0237485	1	0.0231351	1	1	0.0169187
Arpp19	0.0293182	1	0.0751739	1	0.0462861	1	1	0.0502594
Arrb2	-0.00269208	1	0.0116895	1	-0.0125076	1	1	-0.00117008
Arrdc1	0.0490777	1	0.0387967	1	0.0903078	1	1	0.0593941
Arrdc4	0.0777842	3.42978e-05	0.0222457	1	0.068074	1	0.00219931	0.0560346
Arsa	0.0331233	1	0.0129453	1	0.0237275	1	1	0.0232653
Arsb	0.0125506	1	0.0267599	1	0.0528696	1	1	0.0307267
Arsk	0.0292115	1	0.0239428	1	0.064254	1	1	0.0391361
Artn	-0.0206596	1	0.00462207	1	-0.0381167	1	1	-0.0180514
Arxes2	0.0025484	1	-0.00715807	1	0.0215681	1	1	0.00565282
As3mt	0.0162984	1	0.0123384	1	0.0431704	1	1	0.0239357
Asah1	-0.241547	4.06275e-35	-0.194553	1.2283e-29	-0.246343	2.26162e-12	1.70018e-71	-0.227481
Asap1	0.158278	0.00447336	0.148976	0.0149012	0.234417	0.00456988	3.91643e-05	0.180557
Asap2	-0.0747038	1	-0.0727365	1	-0.100127	1	1	-0.0825224
Asb13	0.000713899	1	0.00860493	1	0.016477	1	1	0.0085986
Asb3	0.0488326	1	0.032498	1	0.0983065	1	1	0.059879
Asb6	0.0390758	1	0.0091662	1	-0.00785031	1	1	0.0134639
Asb8	0.0261564	1	0.0209555	1	0.0245109	1	1	0.0238743
Ascc1	-0.0092751	1	-0.0193739	1	0.0465206	1	1	0.00595719
Ascc2	-0.0370056	1	-0.0181361	1	-0.0184761	1	1	-0.0245393
Ascc3	0.00556753	1	-0.0180669	1	0.0854781	1	1	0.0243262
Asf1a	0.0015055	1	-0.00404902	1	-0.0258247	1	1	-0.00945608
Asf1b	-0.0631253	1	-0.0359553	1	-0.0774269	1	1	-0.0588358
Ash1l	0.101662	1	0.071248	1	0.0782239	1	1	0.0837114
Ash2l	-0.00420302	1	-0.00849939	1	-0.0402351	1	1	-0.0176458
Asl	0.0672236	1	0.040983	1	0.0781456	1	1	0.0621174
Asna1	-0.081348	1	-0.0328886	1	-0.0815872	1	1	-0.0652746
Asns	-0.0398813	1	-0.0112623	1	-0.0322184	1	1	-0.0277873
Asnsd1	-0.066439	1	-0.0300236	1	-0.0243547	1	1	-0.0402724
Aspa	-0.0590269	1	-0.0934596	1	-0.170222	0.10827	0.616519	-0.10757
Asph	-0.0738782	1	-0.104922	0.14771	-0.124732	1	0.700343	-0.101177
Aspm	-0.0417274	1	0.0491442	1	-0.0511787	1	1	-0.0145873
Aspscr1	-0.05189	1	-0.0328675	1	-0.0221124	1	1	-0.0356233
Asrgl1	0.0204568	1	0.0165343	1	0.0365852	1	1	0.0245254
Asxl1	0.0470984	1	0.0633638	1	0.0181535	1	1	0.0428719
Asxl2	0.0694349	1	0.0541557	1	0.0377085	1	1	0.0537664
Atad1	0.0176395	1	0.0439154	1	0.00629361	1	1	0.0226162
Atad2	0.109344	1	0.163814	1	-0.0358277	1	1	0.07911
Atad2b	-0.023225	1	-0.0281574	1	-0.0237142	1	1	-0.0250322
Atad3a	-0.121781	0.0068863	-0.0641354	1	-0.084987	1	0.126498	-0.0903011
Atad5	0.0303803	1	0.0241513	1	-0.0298347	1	1	0.00823228
Atat1	-0.00488314	1	0.0190126	1	0.00948162	1	1	0.00787035
Ate1	-0.0385429	1	-0.00405527	1	-0.0493547	1	1	-0.0306509
Atf1	-0.00865111	1	0.00394321	1	-0.0358554	1	1	-0.0135211
Atf2	0.073121	1	0.0795935	1	0.0831889	1	1	0.0786345
Atf3	0.0733466	1	0.0365539	1	0.0237342	1	1	0.0445449
Atf4	-0.0201617	1	-0.00566445	1	-0.0111713	1	1	-0.0123325
Atf5	-0.0236929	1	0.0381555	1	-0.105801	1	1	-0.030446
Atf6	0.0213958	1	0.00898858	1	-0.0798829	1	1	-0.0164995
Atf6b	-0.0436438	1	-0.0164909	1	-0.0144522	1	1	-0.0248623
Atf7	-0.00481682	1	-0.00422729	1	0.0164344	1	1	0.00246344
Atf7ip	0.0555311	1	0.0174267	1	-0.00637459	1	1	0.0221944
Atg10	-0.016724	1	0.0176686	1	0.0100499	1	1	0.00366485
Atg101	-0.00985703	1	-0.0028189	1	0.0664473	1	1	0.0179238
Atg12	0.0598569	1	0.0807542	1	0.140644	0.565588	0.979755	0.0937516
Atg13	0.0344851	1	0.0142304	1	0.0125355	1	1	0.020417
Atg14	0.017455	1	0.00479849	1	0.00457175	1	1	0.00894173
Atg16l1	0.0025923	1	0.0137707	1	0.0102526	1	1	0.00887188
Atg16l2	-0.01259	1	-0.00816046	1	-0.0270314	1	1	-0.0159273
Atg2a	0.00482832	1	0.0215448	1	-0.00906184	1	1	0.00577041
Atg2b	0.0205835	1	0.0115286	1	-0.00110007	1	1	0.0103373
Atg3	-0.0457219	1	-0.0280334	1	-0.0274339	1	1	-0.0337297
Atg4a	0.0220639	1	0.0195865	1	-0.0203316	1	1	0.00710626
Atg4b	-0.00331644	1	-0.0228451	1	-0.0143307	1	1	-0.0134974
Atg4d	-0.0319334	1	-0.00490316	1	-0.0361697	1	1	-0.0243354
Atg5	-0.040625	1	-0.0618663	1	-0.0813797	1	1	-0.0612904
Atg7	0.00412835	1	0.0114777	1	0.0444955	1	1	0.0200339
Atg9a	0.0022608	1	-0.00868153	1	-0.0049437	1	1	-0.00378814
Atic	-0.0546477	1	0.0201143	1	-0.114232	1	1	-0.0495885
Atl2	-0.0343853	1	0.0143154	1	-0.00990177	1	1	-0.00999055
Atl3	0.0638737	1	0.0680593	1	0.0630758	1	1	0.0650029
Atm	0.0638473	1	0.0497193	1	-0.0130968	1	1	0.0334899
Atmin	-0.0131726	1	0.00196255	1	-0.0213212	1	1	-0.0108437
Atn1	0.0522347	1	0.0344443	1	0.0359344	1	1	0.0408711
Atox1	-0.014111	1	0.00596601	1	-0.110522	1	1	-0.0395558
Atp11a	-0.0697734	0.000164649	-0.0462215	0.234797	-0.0785342	1	0.00242706	-0.064843
Atp11b	-0.014647	1	-0.0223352	1	-0.0504691	1	1	-0.0291504
Atp11c	0.0136001	1	0.0300812	1	0.0395046	1	1	0.0277286
Atp13a1	-0.0132519	1	0.00357238	1	0.0336468	1	1	0.00798909
Atp13a2	-0.021309	1	-0.0101399	1	-0.056949	1	1	-0.029466
Atp13a3	0.00918049	1	0.0181742	1	0.0388946	1	1	0.0220831
Atp1a1	-0.232805	1.73866e-11	-0.12516	0.1578	-0.362782	5.00353e-10	1.65122e-18	-0.240249
Atp1a3	0.0499984	1	0.0684832	0.0126224	0.137677	2.99814e-09	1.18427e-08	0.0853862
Atp1b3	-0.149	1.77565e-05	-0.0390726	1	-0.142525	1	0.00127433	-0.110199
Atp23	-0.0229227	1	-0.00101865	1	-0.0356539	1	1	-0.0198651
Atp2a2	-0.104324	1	-0.050499	1	-0.155853	1	1	-0.103559
Atp2b1	-0.0686416	1	-0.0726813	1	-0.032594	1	1	-0.0579723
Atp2b4	0.0491232	1	0.0292229	1	0.0755609	1	1	0.0513023
Atp2c1	0.0542442	1	0.028398	1	0.079621	1	1	0.0540877
Atp5a1	0.21341	1.94818e-13	0.205482	1.40434e-12	0.277206	1.05776e-07	7.84391e-29	0.232032
Atp5b	-0.0119642	1	-0.0227248	1	-0.0927999	1	1	-0.0424963
Atp5c1	0.262989	3.4818e-23	0.146592	1.08347e-06	0.262483	8.75026e-08	1.12895e-32	0.224021
Atp5d	-0.144699	1.29205e-05	-0.0933885	1	-0.112077	1	0.000976964	-0.116721
Atp5e	0.234371	1.28209e-17	0.114331	0.0727731	0.154778	0.0822669	7.78014e-17	0.167827
Atp5f1	0.00145309	1	0.0210642	1	-0.00787524	1	1	0.00488068
Atp5g1	0.17143	0.000987474	0.125232	0.372745	0.114135	1	0.0147854	0.136932
Atp5g2	-0.0306503	1	-0.0596528	1	-0.0405056	1	1	-0.0436029
Atp5g3	0.137096	0.00251493	0.140471	0.000125492	0.13044	1	4.03974e-05	0.136002
Atp5h	-0.00974464	1	-0.0187187	1	-0.0354956	1	1	-0.0213196
Atp5j	-0.0329206	1	-0.0251571	1	-0.0138707	1	1	-0.0239828
Atp5j2	-0.0300302	1	-0.0295988	1	-0.00382798	1	1	-0.0211523
Atp5k	0.0477165	1	0.0133558	1	-0.0173606	1	1	0.0145706
Atp5l	-0.0186018	1	-0.0248028	1	-0.0958631	1	1	-0.0464226
Atp5o.1	-0.0352207	1	0.00811853	1	0.0047825	1	1	-0.00743988
Atp5s	0.0290021	1	0.020422	1	-0.0156658	1	1	0.0112528
Atp6ap1	0.0839614	1	0.0600115	1	0.0579228	1	1	0.0672986
Atp6ap2	-0.0284248	1	0.0253528	1	0.0687527	1	1	0.0218936
Atp6v0a2	-0.0502296	1	-0.0154217	1	-0.0183289	1	1	-0.0279934
Atp6v0b	-0.20162	1.83134e-09	-0.186633	1.5357e-08	-0.266268	5.62033e-07	2.26305e-20	-0.218174
Atp6v0d1	-0.00549342	1	-0.0347591	1	0.00351637	1	1	-0.0122454
Atp6v0e	-0.249905	1.19682e-10	-0.156095	0.00153304	-0.192594	0.127475	1.22778e-11	-0.199531
Atp6v1a	-0.00163323	1	-0.0235897	1	0.027339	1	1	0.000705367
Atp6v1b2	-0.0518469	1	-0.018795	1	-0.0441719	1	1	-0.0382712
Atp6v1c1	0.0338823	1	-0.00408125	1	-0.0308175	1	1	-0.000338838
Atp6v1d	0.0359897	1	-0.00111676	1	0.00198631	1	1	0.0122864
Atp6v1e1	0.00572479	1	-0.0311547	1	0.0692531	1	1	0.0146077
Atp6v1f	-0.00770982	1	-0.0263155	1	0.0293691	1	1	-0.00155206
Atp6v1g1	-0.171094	4.64957e-08	-0.179248	3.59011e-09	-0.100987	1	1.16384e-13	-0.150443
Atp6v1h	0.0479211	1	0.0222459	1	-0.00615179	1	1	0.0213384
Atp7a	0.104276	0.0337765	0.0927722	0.055672	0.122057	1	0.0507184	0.106368
Atp8b2	-0.034477	1	-0.028538	1	-0.0415214	1	1	-0.0348455
Atp9b	0.0242702	1	0.0301043	1	0.0616326	1	1	0.038669
Atpaf1	-0.0342123	1	-0.0341915	1	-0.0975358	1	1	-0.0553132
Atpaf2	-0.0170128	1	-0.029736	1	-0.0523515	1	1	-0.0330334
Atpif1	-0.133003	0.000400941	-0.131744	0.000255226	-0.0975563	1	1.50038e-05	-0.120768
Atr	-0.000190714	1	0.02078	1	0.0315625	1	1	0.0173839
Atraid	0.14276	0.526742	0.0471267	1	0.118883	1	0.972636	0.102923
Atrip	0.00204675	1	0.0119465	1	-0.00204429	1	1	0.00398298
Atrn	0.0221997	1	0.00532414	1	0.000528556	1	1	0.00935079
Atrx	0.534828	7.72501e-35	0.448331	2.60581e-43	0.710584	8.81152e-33	5.60571e-105	0.564581
Atxn1	0.025433	1	0.0138535	1	-0.0393098	1	1	-7.77525e-06
Atxn10	0.130834	0.353675	0.0777746	1	0.146567	1	0.912315	0.118392
Atxn1l	-0.0129047	1	0.0297354	1	0.00868983	1	1	0.00850683
Atxn2	0.0552168	1	0.0411292	1	0.0666526	1	1	0.0543329
Atxn2l	0.00705536	1	0.0148692	1	-0.0190951	1	1	0.000943136
Atxn3	0.0474129	1	0.0243613	1	-0.00447946	1	1	0.0224316
Atxn7	-0.0104952	1	0.00709186	1	-0.0204638	1	1	-0.0079557
Atxn7l1	-0.000709509	1	-0.000645339	1	-0.0294754	1	1	-0.0102767
Atxn7l2	0.0075409	1	-0.0124269	1	0.0197447	1	1	0.0049529
Atxn7l3	0.0902169	1	0.0795354	1	0.0754093	1	1	0.0817205
Atxn7l3b	-0.0583986	1	-0.0298057	1	0.00515654	1	1	-0.0276826
AU019823	-0.050207	1	-0.0286449	1	-0.0556659	1	1	-0.0448393
AU020206	0.0175099	1	0.0346697	1	0.0208527	1	1	0.0243441
AU022252	-0.0452485	1	-0.0258663	1	-0.0375017	1	1	-0.0362055
AU040320	-0.0272704	1	-0.039975	1	-0.0612855	1	1	-0.0428436
Auh	0.0724026	1	0.031935	1	0.055364	1	1	0.0532339
Aunip	-0.0261523	1	0.00856548	1	-0.0193942	1	1	-0.012327
Aup1	-0.0780417	1	-0.0139164	1	-0.0382516	1	1	-0.0434032
Aurka	0.0144269	1	0.0644006	1	0.0386547	1	1	0.0391607
Aurkaip1	-0.243776	5.40371e-15	-0.242013	4.14924e-15	-0.334827	7.90278e-11	7.21363e-36	-0.273539
Aurkb	-0.0278412	1	0.0222432	1	-0.0275425	1	1	-0.0110468
Aven	0.0182347	1	-0.00625465	1	0.0507784	1	1	0.0209195
Avl9	0.0301077	1	0.0264728	1	0.0438318	1	1	0.0334708
Avpi1	-0.161018	0.19157	-0.157425	0.0328065	-0.236237	0.0855036	0.019813	-0.184893
AW209491	0.0227865	1	0.0287687	1	0.053233	1	1	0.0349294
AW549877	0.0374652	1	0.0296184	1	-0.0052104	1	1	0.0206244
AW554918	0.0182135	1	0.0268183	1	0.00539067	1	1	0.0168075
Axin1	-0.0312761	1	-0.0200279	1	-0.0817858	1	1	-0.0443633
Axin2	-0.0573277	0.0468083	-0.0543251	0.41703	-0.0940892	0.674661	0.193642	-0.0685807
Axl	-0.0985585	0.90152	0.0148044	1	0.0378052	1	0.999828	-0.0153163
AY036118	0.062049	1	0.0725178	1	-0.076729	1	1	0.0192793
Azi2	-0.0859064	0.133671	-0.0412165	1	-0.0903059	1	0.673327	-0.0724763
Azin1	-3.84861e-05	1	0.0162181	1	0.0310987	1	1	0.0157594
Azin2	0.00540781	1	-0.0100459	1	0.0333239	1	1	0.00956193
B230118H07Rik	0.14787	0.00167301	0.0847317	1	0.154818	1	0.0465586	0.12914
B230219D22Rik	0.1869	1.99949e-06	0.163246	1.96876e-05	0.285202	2.25744e-05	5.65361e-13	0.211783
B230307C23Rik	-0.00382238	1	0.0241365	1	0.0242474	1	1	0.0148539
B230354K17Rik	0.0374657	1	0.0433636	1	0.0672264	1	1	0.0493519
B2m	0.0922815	1	0.0833918	1	0.221567	0.00775878	0.137047	0.132414
B3galnt2	0.0257689	1	0.0522672	1	0.0362212	1	1	0.0380858
B3galt6	-0.0311424	1	-0.0514307	1	-0.0542061	1	1	-0.0455931
B3gat3	-0.00907046	1	0.02267	1	-0.0230739	1	1	-0.00315811
B3glct	-0.0679673	0.00516259	-0.029902	1	-0.031378	1	0.10394	-0.0430824
B3gnt2	0.00421243	1	0.0155362	1	-0.00528463	1	1	0.00482135
B3gnt9	-0.00808208	1	-0.0212123	1	0.00886266	1	1	-0.00681057
B4galnt1	0.0132442	1	0.0438484	1	0.051539	1	1	0.0362106
B4galt1	0.0250511	1	0.0292508	1	0.0780456	1	1	0.0441158
B4galt2	-0.0442125	1	-0.00215387	1	-0.0301345	1	1	-0.0255003
B4galt3	-0.0139823	1	-0.00206544	1	0.00299247	1	1	-0.00435177
B4galt5	0.0740323	0.460554	0.0401597	1	0.0939604	1	0.956059	0.0693841
B4galt6	0.0315949	1	0.0177414	1	-0.0133047	1	1	0.0120105
B4galt7	0.0432126	1	0.0206542	1	0.0970713	0.782436	0.99795	0.053646
B4gat1	0.011646	1	-0.00636034	1	0.00594031	1	1	0.003742
B930036N10Rik	0.00413024	1	0.00627001	1	-0.0186126	1	1	-0.00273745
B9d1	-0.0115106	1	-0.0276244	1	0.0192618	1	1	-0.00662441
B9d2	-0.00909796	1	-0.00375796	1	0.0213352	1	1	0.00282641
Baalc	-0.00729147	1	-0.00950035	1	0.026943	1	1	0.00338374
Babam1	-0.0126754	1	-0.0162775	1	-0.0290001	1	1	-0.0193177
Babam2	0.0374131	1	0.00800994	1	0.0627511	1	1	0.036058
Bace1	0.0165916	1	0.00739009	1	-0.0773534	1	1	-0.0177906
Bach1	0.013963	1	0.00692039	1	-0.0353843	1	1	-0.00483362
Bach2	-0.0174949	1	-0.00503201	1	0.0218355	1	1	-0.000230454
Bad	0.0327999	1	0.0201481	1	-0.00827588	1	1	0.0148907
Bag1	-0.219078	6.37723e-14	-0.191779	1.5862e-09	-0.316129	4.61849e-10	1.24987e-28	-0.242328
Bag2	-0.098115	0.403884	-0.0617685	1	-0.0640887	1	0.936047	-0.0746574
Bag3	-0.0463849	1	-0.0734581	1	-0.0753445	1	1	-0.0650625
Bag4	-0.0205716	1	-0.00898033	1	-0.0882693	1	1	-0.0392738
Bag5	0.0510002	1	0.0714456	1	0.0240846	1	1	0.0488435
Bag6	-0.0137515	1	0.0155982	1	-0.00681634	1	1	-0.00165656
Bahcc1	0.0272553	1	0.0213358	1	0.00517873	1	1	0.0179233
Baiap2	-0.00233913	1	-0.000221267	1	0.0147031	1	1	0.00404757
Bak1	-0.119133	7.63656e-06	-0.0469399	1	-0.0926667	1	0.000627702	-0.0862464
Banf1	0.0422494	1	0.0707491	1	0.0525311	1	1	0.0551765
Banp	-0.00961281	1	0.00447577	1	-0.0258034	1	1	-0.0103135
Bap1	-0.00334284	1	-0.0126599	1	0.0106142	1	1	-0.00179617
Bard1	0.0121537	1	0.0111759	1	-0.0712172	1	1	-0.0159625
Bax	0.209489	1.94531e-09	0.23087	5.07182e-12	0.265033	1.09433e-05	1.84728e-22	0.235131
Baz1a	0.0173729	1	0.0228629	1	0.0620097	1	1	0.0340818
Baz1b	0.0380825	1	0.0834269	1	0.0540887	1	1	0.0585327
Baz2a	0.0273392	1	-0.011693	1	0.00063681	1	1	0.00542767
Baz2b	0.12523	0.664352	0.117257	1	0.133337	1	0.991585	0.125275
Bbc3	0.027673	1	0.0306642	1	0.0489526	1	1	0.0357633
Bbip1	0.0254735	1	0.0373702	1	0.0684258	1	1	0.0437565
Bbs12	0.0069698	1	0.0184592	1	0.0169402	1	1	0.0141231
Bbs5	0.0232899	1	0.0194617	1	0.0490821	1	1	0.0306112
Bbs7	0.0284815	1	0.028272	1	-0.00168165	1	1	0.0183573
Bbs9	0.0327143	1	0.00473324	1	0.00747933	1	1	0.0149756
Bbx	0.0088998	1	-0.00576243	1	-0.00520472	1	1	-0.000689115
BC003331	0.0305899	1	0.0171578	1	0.0238955	1	1	0.0238811
BC003965	-0.0673049	1	-0.0189824	1	-0.082419	1	1	-0.0562354
BC004004	-0.0544789	1	-0.0240962	1	0.0032958	1	1	-0.0250931
BC005537	0.0352573	1	0.0361169	1	5.94251e-05	1	1	0.0238112
BC005561	0.091839	1	0.0860852	1	0.0914578	1	1	0.089794
BC005624	0.163937	0.000294448	0.118601	0.0390513	0.15234	1	0.000885954	0.14496
BC017643	-0.00887712	1	-0.014563	1	0.0176923	1	1	-0.00191593
BC022687	-0.0182464	1	-0.00563358	1	-0.0223129	1	1	-0.0153976
BC029722	0.0484422	1	0.0496223	1	0.0333185	1	1	0.0437943
BC031181	0.126264	0.180071	0.109711	0.765706	0.173704	1	0.681721	0.13656
BC037034	0.0160438	1	0.0216022	1	0.0589083	1	1	0.0321848
Bcap29	0.0102211	1	0.018137	1	-0.0884823	1	1	-0.0200414
Bcap31	0.112454	0.40848	0.149454	1.40935e-05	0.203975	0.01371	1.19254e-05	0.155294
Bcar1	-0.021053	1	-0.0121038	1	-0.0490223	1	1	-0.027393
Bcar3	-0.0141975	1	-0.0218836	1	0.0301455	1	1	-0.00197854
Bcas2	-0.0593263	1	-0.00710684	1	-0.0217922	1	1	-0.0294084
Bcas3	0.015287	1	0.0013836	1	-0.0157905	1	1	0.000293378
Bcat1	-0.0888481	0.00100481	-0.0722617	0.159076	-0.116418	0.424423	0.003844	-0.0925091
Bcat2	-0.0312416	1	0.00687918	1	-0.0614427	1	1	-0.0286017
Bccip	-0.0178712	1	-0.00277425	1	-0.0422011	1	1	-0.0209488
Bcdin3d	0.0131826	1	0.00708833	1	-0.00942112	1	1	0.00361661
Bckdha	0.0435626	1	0.0139145	1	0.0119564	1	1	0.0231445
Bckdhb	0.0551518	1	0.0176456	1	0.0150714	1	1	0.0292896
Bckdk	0.0605387	1	0.0251839	1	-0.00942386	1	1	0.0254329
Bcl10	-0.297217	4.03682e-22	-0.200287	3.18906e-08	-0.293673	3.17581e-06	1.31447e-31	-0.263726
Bcl2	0.0412394	1	0.0484728	1	0.0243804	1	1	0.0380309
Bcl2l1	0.0400618	1	0.0245788	1	0.0114768	1	1	0.0253725
Bcl2l11	0.0842399	1	0.094336	1	0.114822	1	1	0.0977991
Bcl2l12	0.0226694	1	0.0162789	1	0.0117819	1	1	0.0169101
Bcl2l13	0.0148123	1	0.0118214	1	0.0049601	1	1	0.0105313
Bcl3	0.0355238	1	0.0381492	1	0.0408728	1	1	0.0381819
Bcl7a	-0.0260012	1	-0.0038279	1	-0.0325138	1	1	-0.020781
Bcl7b	-0.00493186	1	-0.0241801	1	-0.0239261	1	1	-0.0176793
Bcl7c	-0.0235216	1	0.013321	1	0.0131159	1	1	0.000971764
Bcl9	0.0219745	1	0.0142856	1	-0.00585618	1	1	0.0101346
Bcl9l	0.0401575	1	-0.00325441	1	-0.0252092	1	1	0.00389796
Bclaf1	0.071232	1	0.0657387	1	0.0473665	1	1	0.0614457
Bclaf3	0.135974	0.00933024	0.161599	1.70145e-05	0.112012	1	2.20996e-05	0.136528
Bcor	0.0136225	1	-0.0117366	1	-0.0457427	1	1	-0.0146189
Bcorl1	0.0773738	1	0.0670774	1	0.0770991	1	1	0.0738501
Bcr	-0.0346297	1	-0.0322685	1	-0.0413745	1	1	-0.0360909
Bcs1l	0.0251215	1	0.00389355	1	-0.0353354	1	1	-0.00210679
Bdp1	0.0292961	1	0.0500286	1	-0.00332882	1	1	0.025332
Becn1	0.116935	0.0832653	0.0833179	1	0.102483	1	0.547481	0.100912
Bend7	0.00295767	1	0.00669176	1	-0.0141721	1	1	-0.00150757
Bet1	-0.0110189	1	0.0176165	1	8.45889e-05	1	1	0.0022274
Bet1l	-0.00438513	1	-0.0145479	1	0.0208763	1	1	0.000647747
Bex3	-0.0794978	1	0.00576041	1	-0.051315	1	1	-0.0416841
Bfar	-0.0144586	1	-0.00257513	1	0.0607554	1	1	0.0145739
Bgn	0.00650013	1	0.0224249	1	-0.000400031	1	1	0.00950832
Bhlhb9	-0.0296159	1	-0.00674966	1	-0.0233567	1	1	-0.0199074
Bhlhe40	0.155224	1	0.130938	1	0.202015	1	1	0.162726
Bicd1	-0.0507893	0.0190791	-0.0179848	1	-0.0474605	1	0.244149	-0.0387449
Bicd2	0.085358	1	0.0836764	1	0.0562899	1	1	0.0751081
Bicral	-0.00145338	1	0.000607228	1	0.0172319	1	1	0.00546193
Bid	0.0233009	1	0.00941044	1	-0.0112516	1	1	0.00715326
Bin1	0.0625762	1	0.0868468	1	0.11142	1	1	0.0869475
Bin3	-0.00268628	1	0.00188366	1	0.00337566	1	1	0.000857682
Birc2	0.00662986	1	0.0197321	1	0.0570259	1	1	0.0277959
Birc3	-0.0183646	1	-0.00830207	1	-0.0123102	1	1	-0.0129923
Birc5	-0.297787	1	-0.0485121	1	-0.245532	1	1	-0.197277
Birc6	-0.0534749	1	-0.000644103	1	-0.0122746	1	1	-0.0221312
Bivm	0.00970915	1	0.00799147	1	0.0385597	1	1	0.0187535
Blcap	0.0829371	1	0.0741955	1	0.136732	0.632653	0.988608	0.0979548
Blm	0.0115361	1	0.0164583	1	-0.0446171	1	1	-0.00554093
Blmh	-0.172349	2.61614e-08	-0.0961579	0.112381	-0.0864835	1	6.28005e-07	-0.11833
Bloc1s1	-0.00232314	1	0.00329651	1	0.0128921	1	1	0.00462182
Bloc1s2	-0.0394931	1	-0.00837104	1	-0.0101897	1	1	-0.0193513
Bloc1s4	-0.0374456	1	0.0138219	1	-0.0186836	1	1	-0.0141024
Bloc1s5	0.00721664	1	0.0158544	1	0.0348945	1	1	0.0193219
Bloc1s6	0.0696839	1	0.0600586	1	0.090127	1	1	0.0732899
Blvra	0.0920347	1	0.0467188	1	0.0573419	1	1	0.0653651
Blvrb	0.337037	8.99524e-23	0.19802	2.09953e-07	0.265551	9.60322e-05	5.29259e-30	0.266869
Blzf1	-0.000946323	1	0.00421565	1	0.00738174	1	1	0.00355036
Bmi1	0.0915824	1	0.0869959	1	0.110185	1	1	0.0962545
Bmp1	0.144319	0.475777	0.0985853	1	0.157961	1	0.960444	0.133622
Bmp2k	0.00100193	1	-0.00690662	1	-0.0333903	1	1	-0.0130983
Bmpr1a	-0.00511194	1	-0.0227259	1	-0.0233482	1	1	-0.017062
Bmpr2	0.00219978	1	0.00489374	1	0.0530996	1	1	0.0200644
Bms1	0.00360604	1	-0.00869933	1	0.0837814	1	1	0.0262294
Bmt2	-0.0631756	0.0870037	-0.0539537	1	-0.0762347	1	0.558826	-0.0644547
Bnip1	0.0257022	1	-0.0151983	1	-8.84605e-05	1	1	0.00347182
Bnip2	0.0299833	1	0.0616402	1	0.0105415	1	1	0.034055
Bnip3	-0.104216	1	-0.183556	0.0638547	-0.0470934	1	0.48118	-0.111622
Bnip3l	-0.070467	1	-0.116875	1	0.00226996	1	1	-0.0616907
Bod1	0.081266	1	0.0620674	1	0.117476	1	1	0.0869365
Bod1l	0.0419313	1	0.049137	1	0.12582	1	1	0.072296
Bok	-0.245837	1.47904e-12	-0.249954	1.46179e-11	-0.384107	4.30512e-11	2.76387e-30	-0.293299
Bola1	0.245082	7.12839e-12	0.153391	0.00365865	0.320496	1.9035e-09	6.80685e-20	0.239657
Bola2	0.0639831	1	0.0320154	1	0.0329328	1	1	0.0429771
Bola3	0.0148452	1	0.04969	1	0.0234993	1	1	0.0293448
Bop1	0.0122245	1	0.0204049	1	0.0299694	1	1	0.0208663
Bora	-0.0238567	1	-0.00170151	1	-0.0357579	1	1	-0.0204387
Borcs5	0.0146209	1	0.0154964	1	0.0691542	1	1	0.0330905
Borcs6	-0.0157414	1	0.00974334	1	0.0466	1	1	0.013534
Borcs7	-0.0275457	1	-0.00692006	1	0.0258894	1	1	-0.0028588
Borcs8	-0.106744	0.272613	-0.101609	0.0899708	-0.0987976	1	0.284086	-0.102384
Bpgm	-0.00120821	1	-0.137079	1	-0.139296	1	1	-0.0925279
Bphl	0.0944046	1	0.0596828	1	0.0899408	1	1	0.0813427
Bpnt1	-0.0279416	1	-0.0241794	1	-0.0316422	1	1	-0.027921
Bptf	0.207407	6.98784e-06	0.202938	1.2173e-06	0.210708	0.138574	4.78188e-10	0.207018
Braf	-0.00680019	1	-0.0154989	1	-0.0361771	1	1	-0.0194921
Brap	-0.00263783	1	-0.016718	1	0.0192275	1	1	-4.27863e-05
Brca1	0.0350013	1	0.0471577	1	0.040905	1	1	0.0410213
Brca2	0.0470433	1	0.0446664	1	0.0862875	1	1	0.0593324
Brcc3	0.0757443	1	0.0689979	1	0.112301	1	1	0.0856812
Brd1	0.0225393	1	0.0442457	1	0.0325446	1	1	0.0331099
Brd2	-0.154088	0.0138129	-0.104573	1	-0.157902	0.146223	0.0534318	-0.138854
Brd3	0.141951	0.0544763	0.124948	0.468257	0.160527	1	0.290764	0.142475
Brd4	-0.117873	0.0439294	-0.0391815	1	-0.114591	1	0.395739	-0.0905483
Brd7	0.00817649	1	0.0429044	1	-0.0104585	1	1	0.0135408
Brd8	0.133148	1	0.123863	1	0.111837	1	1	0.122949
Brd9	0.0249506	1	0.0525678	1	0.0559486	1	1	0.044489
Brf1	-0.0118819	1	0.0102146	1	-0.0126484	1	1	-0.00477189
Brf2	-0.00870483	1	-0.0202108	1	-0.0199778	1	1	-0.0162978
Bri3	-0.0109647	1	0.039282	1	0.0119862	1	1	0.0134345
Bri3bp	-0.00460545	1	0.00602138	1	0.0281716	1	1	0.0098625
Brip1	0.00963655	1	0.0212654	1	-0.0088723	1	1	0.0073432
Brip1os	0.0235122	1	0.0400698	1	0.0713656	1	1	0.0449826
Brix1	-0.000920354	1	-0.000219983	1	0.0168269	1	1	0.00522886
Brk1	-0.0799444	1	-0.0941652	0.234921	-0.109021	1	0.821658	-0.094377
Brms1	0.0300729	1	0.0476412	1	0.0775084	1	1	0.0517409
Brms1l	-0.00733881	1	0.0383145	1	0.0411039	1	1	0.0240265
Brox	-0.00995448	1	0.0305139	1	-0.0261839	1	1	-0.00187483
Brpf1	0.000321003	1	0.0144467	1	0.0284032	1	1	0.0143903
Brpf3	0.0113819	1	0.0215524	1	0.013144	1	1	0.0153594
Brwd1	-0.0144295	1	-0.0222285	1	-0.0128046	1	1	-0.0164875
Brwd3	0.0983593	0.173114	0.0645207	1	0.137501	1	0.742957	0.100127
Bscl2	-0.0246532	1	-0.00200176	1	0.0046769	1	1	-0.00732601
Bsdc1	-0.0187868	1	-0.0287667	1	-0.0194531	1	1	-0.0223355
Bsg	-0.215289	2.06081e-06	-0.295134	1.8877e-16	-0.121231	1	4.92292e-19	-0.210551
Bsn	0.0554075	1	0.0361102	1	0.0664876	1	1	0.0526684
Bst2	0.0495034	1	0.0282704	1	0.156893	1	1	0.0782223
Btaf1	-0.0001401	1	0.0351477	1	0.0152583	1	1	0.0167553
Btbd1	-0.0220432	1	-0.0378887	1	-0.0377237	1	1	-0.0325519
Btbd10	-0.00536743	1	0.0208885	1	0.0290561	1	1	0.014859
Btbd2	0.0436505	1	0.00743525	1	0.062046	1	1	0.0377106
Btbd3	0.0356424	1	0.0404767	1	0.057002	1	1	0.0443737
Btbd7	0.0576332	1	0.0372509	1	0.0525139	1	1	0.0491327
Btbd9	-0.0574438	1	-0.00558372	1	-0.0408674	1	1	-0.0346316
Btd	-0.0150594	1	-0.00515769	1	0.00683424	1	1	-0.00446096
Btf3	0.146521	5.36405e-08	0.11521	1.14764e-06	0.223708	1.32854e-11	1.30409e-21	0.161813
Btf3l4	-0.021334	1	-0.0110377	1	-0.0467129	1	1	-0.0263615
Btg1	-0.067059	1	-0.0882251	1	-0.113385	1	1	-0.0895563
Btg2	-0.0575003	1	-0.0250022	1	-0.104837	1	1	-0.0624464
Btg3	-0.12425	1.66981e-05	-0.0840237	0.26993	-0.090964	1	0.000401491	-0.0997457
Btrc	0.0361674	1	0.024505	1	0.0258132	1	1	0.0288285
Bub1	0.0538496	1	0.0985138	1	0.0400096	1	1	0.0641243
Bub1b	0.0295773	1	0.072429	1	0.0100317	1	1	0.037346
Bub3	-0.0505088	1	-0.0332344	1	-0.0278274	1	1	-0.0371902
Bud13	0.00849606	1	0.0187697	1	-0.00553734	1	1	0.00724282
Bud23	0.0365563	1	0.0434622	1	0.0253718	1	1	0.0351301
Bud31	-0.0600552	1	-0.0366235	1	0.0025871	1	1	-0.0313639
Bvht	0.00514526	1	0.0178217	1	-0.0309192	1	1	-0.00265074
Bysl	-0.0297314	1	-0.0243472	1	-0.0208314	1	1	-0.02497
Bzw1	-0.0514211	1	-0.0367957	1	-0.152404	0.887914	0.999744	-0.0802071
Bzw2	-0.0482529	1	-0.0153025	1	-0.0760587	1	1	-0.046538
C030006K11Rik	-0.0157737	1	-0.0109046	1	0.00180024	1	1	-0.00829268
C130013H08Rik	-0.0346019	1	-0.063089	1	-0.0809121	1	1	-0.0595343
C130071C03Rik	0.00967578	1	0.0124107	1	-0.0292578	1	1	-0.00239045
C1d	0.00765792	1	-0.0222832	1	-0.0233481	1	1	-0.0126578
C1galt1	-0.0558699	1	-0.0145848	1	-0.00173108	1	1	-0.0240619
C1galt1c1	0.0900283	0.538113	0.0690284	1	0.112039	0.593478	0.891931	0.0903652
C1qa	-0.0147916	1	0.0300574	1	-0.0407011	1	1	-0.00847842
C1qb	-0.00396544	1	0.0258167	1	-0.0144295	1	1	0.0024739
C1qbp	-0.0137096	1	0.0458379	1	0.028504	1	1	0.0202108
C1qtnf1	-0.0708077	0.635702	-0.0646784	1	-0.0355157	1	0.988924	-0.0570006
C2cd2l	-0.0143286	1	-0.00814023	1	-0.046979	1	1	-0.0231493
C2cd3	0.00198921	1	0.00755528	1	0.0163021	1	1	0.00861552
C330007P06Rik	0.0299037	1	0.035545	1	0.0804267	1	1	0.0486251
C330018D20Rik	0.0119533	1	0.0241417	1	0.0576314	1	1	0.0312421
C330027C09Rik	-0.0174156	1	-0.00608606	1	-0.0493918	1	1	-0.0242978
C77080	0.00593228	1	0.0230693	1	0.00312393	1	1	0.0107085
C87436	0.0115919	1	0.0278719	1	0.0204733	1	1	0.019979
CAAA01118383.1	-0.0716528	0.688915	-0.0485079	1	-0.0661831	1	0.993461	-0.0621146
Caap1	-0.0454669	1	-0.0355397	1	-0.0586612	1	1	-0.0465559
Cab39	-0.0232664	1	-0.0069264	1	0.0245164	1	1	-0.00189213
Cab39l	-0.00978285	1	-0.00100977	1	-0.00948669	1	1	-0.00675977
Cabin1	-0.0285311	1	-0.00513692	1	-0.00924456	1	1	-0.0143042
Cables2	0.0194384	1	0.0223709	1	0.0263257	1	1	0.0227117
Cacfd1	0.00194935	1	0.029322	1	0.0588154	1	1	0.0300289
Cachd1	-0.0377693	0.198656	-0.0346505	1	-0.0450751	1	0.779168	-0.039165
Cacna1a	0.0365153	1	0.0132857	1	0.0114929	1	1	0.0204313
Cacna1c	0.00256537	1	0.00416549	1	-0.0276845	1	1	-0.00698454
Cacnb3	0.0568295	1	0.0454202	1	0.00547812	1	1	0.0359093
Cactin	-0.0184009	1	0.00113489	1	0.025035	1	1	0.00258966
Cacul1	-0.0134353	1	0.0257414	1	0.023084	1	1	0.0117967
Cacybp	-0.0930502	1	-0.0303635	1	-0.114803	1	1	-0.0794056
Cad	0.0183279	1	0.00868208	1	-0.0930731	1	1	-0.0220211
Cadm1	0.0970499	1	0.10851	1	0.101998	1	1	0.102519
Calcoco1	0.0164812	1	0.00648806	1	0.0517731	1	1	0.0249142
Cald1	-0.0746175	1	-0.0324871	1	-0.0711022	1	1	-0.0594023
Calm1	-0.0374123	1	-0.0499247	1	-0.124474	1	1	-0.0706037
Calm2	-0.167057	0.00199507	-0.0788356	1	-0.102369	1	0.0529553	-0.116087
Calm3	0.0532454	1	0.0380695	1	-0.0116375	1	1	0.0265591
Calr	-0.565027	1.83589e-35	-0.433018	7.32562e-25	-0.518673	7.47353e-16	1.47623e-70	-0.505573
Calu	-0.092942	1	-0.0696158	1	-0.192772	1	1	-0.118443
Camk1	0.139474	0.018624	0.0770402	1	0.103588	1	0.24056	0.106701
Camk2d	-0.0154394	1	-0.0326007	1	-0.0597761	1	1	-0.0359387
Camk2g	-0.00852742	1	-0.0295724	1	-0.00969644	1	1	-0.0159321
Camk2n1	-0.160987	8.02078e-06	-0.181315	9.3216e-09	-0.169068	1	3.64847e-11	-0.170457
Camkk2	-0.0151671	1	-0.0131466	1	-0.0185958	1	1	-0.0156365
Caml	0.105169	1	0.10191	1	0.271141	2.47512e-05	0.00167954	0.159407
Camsap1	0.0822953	1	0.0833988	1	0.117573	1	1	0.0944223
Camsap2	0.00912626	1	0.0180504	1	-0.0343266	1	1	-0.00238332
Camta1	-0.135149	1.0522e-08	-0.0943175	0.005995	-0.167585	0.00535399	1.49288e-10	-0.132351
Camta2	0.00471429	1	-0.0137085	1	-0.0121638	1	1	-0.00705265
Cand1	-0.00102312	1	0.0190784	1	-0.0495269	1	1	-0.0104905
Cant1	-0.0187805	1	0.00817856	1	0.00050647	1	1	-0.00336516
Canx	-0.126167	0.144132	-0.06375	1	-0.167326	0.760783	0.619918	-0.119081
Cap1	-0.29932	1.21438e-21	-0.290401	3.88147e-20	-0.371967	8.54581e-12	2.8687e-48	-0.320563
Capg	0.0380226	1	-0.0415504	1	0.0958098	1	1	0.0307607
Capn1	0.0530919	1	0.0615845	1	0.128679	1	1	0.0811184
Capn10	-0.0461203	0.679807	-0.00662809	1	-0.0269053	1	0.992806	-0.0265512
Capn15	-0.0399161	1	-0.00360158	1	-0.0725879	1	1	-0.0387019
Capn2	0.0988543	1	0.0727364	1	0.0810718	1	1	0.0842208
Capn7	0.000663722	1	0.0234851	1	-0.043632	1	1	-0.00649437
Capns1	0.0666024	1	0.0238531	1	0.0223886	1	1	0.0376147
Caprin1	0.279902	3.59618e-12	0.174875	0.000926281	0.238267	0.00073835	2.12392e-15	0.231015
Capza1	-0.0895388	1	-0.0472306	1	-0.11291	1	1	-0.0832266
Capza2	0.0850309	1	0.0733627	1	0.0321648	1	1	0.0635195
Capzb	-0.58234	2.37638e-73	-0.522821	3.73534e-60	-0.61961	2.21843e-34	1.44093e-161	-0.574924
Car12	-0.0646095	0.0029827	-0.0911283	1.30897e-07	-0.0563157	1	1.00466e-07	-0.0706845
Car13	0.0237964	1	0.0150934	1	0.0333572	1	1	0.0240823
Car5b	-0.0861032	0.0320723	-0.0509151	1	-0.0715472	1	0.332132	-0.0695218
Car9	-0.321228	1.64444e-20	-0.269738	1.85168e-19	-0.286735	6.18191e-06	9.73195e-41	-0.292567
Card19	0.0862863	1	0.0889119	1	0.0734784	1	1	0.0828922
Carhsp1	0.0342308	1	0.0344794	1	0.139075	1	1	0.0692617
Carm1	0.0579078	1	0.0629581	1	0.0140843	1	1	0.0449834
Carmil1	0.00421404	1	0.0240773	1	0.0387309	1	1	0.0223408
Carnmt1	-0.047957	1	-0.0429346	1	0.00114763	1	1	-0.0299147
Cars	0.00963039	1	0.0206496	1	-0.0538201	1	1	-0.00784669
Cars2	-0.000309797	1	0.0447226	1	0.0677614	1	1	0.0373914
Casc1	0.0115931	1	0.0270757	1	0.0515898	1	1	0.0300862
Casc3	0.0400608	1	0.0652793	1	0.0338965	1	1	0.0464122
Casc4	-0.085316	0.00441622	-0.0613349	1	-0.184666	0.0066326	0.00193076	-0.110439
Casd1	0.0183845	1	0.00974401	1	-0.00503791	1	1	0.00769685
Cask	-0.0145338	1	-0.0183527	1	-0.0568262	1	1	-0.0299042
Casp1	-0.225368	1.96362e-17	-0.234005	2.90047e-14	-0.21218	0.0468621	7.25009e-29	-0.223851
Casp12	-0.0743146	0.000444879	-0.0855768	0.00597375	-0.107375	0.813674	0.000214341	-0.0890888
Casp3	0.0163455	1	0.00953851	1	-0.0624329	1	1	-0.012183
Casp6	0.0410076	1	-0.0190726	1	0.0891202	1	1	0.0370184
Casp8	0.00837715	1	0.00447433	1	0.0349203	1	1	0.0159239
Casp8ap2	-0.0924323	0.855215	-0.0585772	1	-0.146647	1	0.999433	-0.0992187
Cast	0.189593	0.000258193	0.119154	0.409468	0.209313	0.541249	0.00334639	0.172687
Cat	0.049531	1	0.0292037	1	0.037261	1	1	0.0386652
Cav1	-0.0240872	1	-0.0963839	1	-0.157864	1	1	-0.0927785
Cav2	-0.0229277	1	-0.0485165	1	0.00681019	1	1	-0.0215447
Cavin1	0.0529061	1	0.0451651	1	0.0082353	1	1	0.0354355
Cavin2	-0.145494	2.86996e-15	-0.0859678	7.91187e-08	-0.147629	0.00243537	8.94033e-22	-0.126364
Cavin3	0.157749	0.333985	0.057557	1	0.146423	1	0.901088	0.120576
Cavin4	-0.147629	2.64246e-09	-0.210829	8.80889e-16	-0.258247	1.07114e-08	6.7854e-29	-0.205568
Cbfa2t2	0.0368262	1	0.0292791	1	0.0395431	1	1	0.0352161
Cbfb	0.0196084	1	-0.0171279	1	-0.0459363	1	1	-0.0144853
Cbl	-0.0138721	1	0.011526	1	-0.0405918	1	1	-0.0143126
Cblb	0.0184671	1	0.0215244	1	-0.00974759	1	1	0.0100813
Cbll1	0.0185919	1	0.0456585	1	0.000200755	1	1	0.0214837
Cbr1	0.0373591	1	-0.0140538	1	0.0521111	1	1	0.0251388
Cbr3	0.0292967	1	0.0171236	1	-0.0057356	1	1	0.0135616
Cbr4	0.050518	1	0.0196391	1	0.077071	1	1	0.049076
Cbwd1	-0.00414703	1	0.0133076	1	-0.0536864	1	1	-0.0148419
Cbx1	0.221962	2.70264e-08	0.221499	8.04582e-12	0.237681	0.00176741	4.86581e-19	0.227047
Cbx3	-0.00745546	1	0.0376769	1	-0.00692581	1	1	0.00776521
Cbx4	0.00758391	1	-0.0143621	1	-0.0396706	1	1	-0.0154829
Cbx5	-0.0301618	1	-0.0250709	1	-0.0357702	1	1	-0.0303343
Cbx6	-0.00954209	1	0.0131615	1	-0.0468086	1	1	-0.0143964
Cby1	-0.0502537	1	-0.0437895	1	-0.0421612	1	1	-0.0454015
Cc2d1a	-0.0501805	1	-0.0104245	1	-0.0501534	1	1	-0.0369195
Cc2d1b	-0.0386489	1	-0.020746	1	-0.0521404	1	1	-0.0371784
Cc2d2a	0.0255422	1	0.00951775	1	0.00841627	1	1	0.0144921
Ccar1	-0.0111048	1	0.0209825	1	0.0116495	1	1	0.00717574
Ccdc102a	-0.0241748	1	-0.0110129	1	0.0449758	1	1	0.00326269
Ccdc107	-0.144048	3.56926e-06	-0.127632	0.00391296	-0.19834	0.156126	4.79318e-07	-0.156673
Ccdc112	-0.0408956	1	-0.0226942	1	0.0388715	1	1	-0.00823945
Ccdc115	-0.0620394	1	-0.0561938	1	-0.122935	1	1	-0.0803893
Ccdc12	0.0490172	1	0.0836221	1	0.12004	1	1	0.0842265
Ccdc122	0.0210717	1	-0.00425379	1	0.0297695	1	1	0.0155291
Ccdc124	-0.191763	4.93932e-07	-0.127686	0.015372	-0.189644	0.464528	7.40194e-07	-0.169698
Ccdc126	-0.0158911	1	-0.00286088	1	0.00779513	1	1	-0.00365227
Ccdc127	0.0787368	1	0.0923372	1	0.101454	1	1	0.0908426
Ccdc130	-0.0103146	1	-0.0267973	1	-0.0231212	1	1	-0.0200777
Ccdc134	-0.0118088	1	-0.0113898	1	0.0137471	1	1	-0.00315047
Ccdc137	-0.0131582	1	-0.0141857	1	-0.0256862	1	1	-0.0176767
Ccdc15	0.0206417	1	-0.00105046	1	-0.0358893	1	1	-0.00543267
Ccdc163	-0.0472074	1	-0.0327504	1	-0.0498609	1	1	-0.0432729
Ccdc167	-0.0532698	1	-0.0239783	1	-0.0498362	1	1	-0.0423614
Ccdc173	0.0321645	1	0.015535	1	0.0317527	1	1	0.0264841
Ccdc174	-0.00810776	1	-0.0385438	1	-0.0262136	1	1	-0.0242884
Ccdc18	0.157642	0.623324	0.0962539	1	0.10469	1	0.987598	0.119529
Ccdc181	0.00189371	1	0.0122149	1	-0.0412498	1	1	-0.00904706
Ccdc186	-0.0287585	1	-0.0280213	1	0.00585511	1	1	-0.0169749
Ccdc191	0.018356	1	0.00947496	1	0.0527065	1	1	0.0268458
Ccdc22	0.0487552	1	0.0512696	1	0.0650418	1	1	0.0550222
Ccdc25	-0.0645697	1	-0.0438513	1	-0.0582976	1	1	-0.0555728
Ccdc28a	0.00471455	1	-0.00474177	1	0.000260801	1	1	7.78591e-05
Ccdc32	0.0838263	1	0.0101219	1	0.0929546	1	1	0.0623009
Ccdc34	0.267479	4.40931e-08	0.245416	1.6717e-09	0.292182	0.0343048	2.18071e-15	0.268359
Ccdc43	0.048332	1	0.0601909	1	0.0915854	1	1	0.0667028
Ccdc47	-0.00205633	1	-0.0119027	1	-0.00336936	1	1	-0.00577614
Ccdc50	-0.00861592	1	0.0494605	1	0.0805694	1	1	0.0404714
Ccdc58	-0.000117354	1	-0.0297885	1	0.0646464	1	1	0.0115802
Ccdc59	0.011993	1	0.0202014	1	0.134646	1	1	0.0556134
Ccdc6	0.0592871	1	0.0476869	1	0.023271	1	1	0.043415
Ccdc61	-0.00525017	1	0.0192125	1	-0.0197794	1	1	-0.00193902
Ccdc66	0.0253007	1	0.0374735	1	0.0441571	1	1	0.0356438
Ccdc68	0.137887	0.0015564	0.10113	1	0.149144	1	0.0441487	0.129387
Ccdc71	0.00319425	1	0.0103139	1	0.0512602	1	1	0.0215894
Ccdc71l	0.0447348	1	0.00845215	1	0.0626195	1	1	0.0386022
Ccdc77	0.000588432	1	0.0159814	1	-0.0261017	1	1	-0.00317728
Ccdc82	0.107034	1	0.0782767	1	0.0380165	1	1	0.0744424
Ccdc85b	0.0177992	1	-0.0126764	1	-0.000822773	1	1	0.00143331
Ccdc86	0.025939	1	0.0579191	1	0.165542	0.242055	0.828988	0.0831335
Ccdc88a	0.0712883	1	0.0673626	1	0.118315	1	1	0.0856551
Ccdc9	0.0282631	1	0.0405225	1	0.0347326	1	1	0.034506
Ccdc90b	-0.0264925	1	0.00766412	1	0.012077	1	1	-0.00225048
Ccdc91	0.02949	1	0.01016	1	0.0408089	1	1	0.0268196
Ccdc93	0.0213536	1	0.00592124	1	0.0198913	1	1	0.015722
Ccdc94	0.00426878	1	0.0224226	1	0.0166424	1	1	0.0144446
Ccdc97	0.0132888	1	0.000126508	1	0.0204663	1	1	0.0112939
Cchcr1	0.0058263	1	0.0197562	1	0.0452238	1	1	0.0236021
Ccl25	-0.0201001	1	-0.000776581	1	0.0641199	1	1	0.0144144
Ccm2	0.118205	1	0.126515	0.252112	0.162684	0.665545	0.734626	0.135801
Ccna2	-0.0943432	1	0.045924	1	-0.147243	1	1	-0.0652208
Ccnb1	1.93794e-05	1	0.106231	1	0.024538	1	1	0.043596
Ccnb2	-0.0182761	1	0.020005	1	0.0700321	1	1	0.0239203
Ccnc	-0.030565	1	0.00655973	1	-0.00252583	1	1	-0.00884369
Ccnd1	0.00882688	1	-0.0270552	1	-0.0474545	1	1	-0.0218943
Ccnd2	-0.316146	5.06591e-15	-0.168767	0.000874866	-0.330201	4.97877e-05	2.85565e-19	-0.271705
Ccnd3	-0.163274	4.36629e-05	-0.106524	0.010742	-0.155	0.847871	4.94455e-05	-0.141599
Ccndbp1	0.0897249	1	0.0650086	1	0.0975989	1	1	0.0841108
Ccne1	-0.0315229	1	-0.00674244	1	-0.0314407	1	1	-0.0232353
Ccne2	0.00763115	1	-0.00271874	1	-0.0118122	1	1	-0.00229993
Ccnf	-0.029085	1	0.010863	1	-0.0487985	1	1	-0.0223402
Ccng1	-0.0258179	1	-0.00730587	1	-0.0390042	1	1	-0.0240426
Ccng2	-0.0291923	1	-0.0881098	1	-0.023988	1	1	-0.0470967
Ccnh	0.137209	0.00269268	0.143888	0.000122112	0.143458	1	4.1873e-05	0.141518
Ccni	-0.0142758	1	-0.0723964	1	0.00652811	1	1	-0.0267147
Ccnk	0.00346564	1	0.0173421	1	-0.0320043	1	1	-0.0037322
Ccnl1	0.0793065	1	0.0688421	1	0.0990931	1	1	0.0824139
Ccnl2	-0.123404	0.0011492	-0.0913347	0.972411	-0.0945162	1	0.0345239	-0.103085
Ccnt1	0.024713	1	-0.0163695	1	-0.029347	1	1	-0.00700119
Ccnt2	-1.00217e-05	1	-0.019809	1	-0.0502214	1	1	-0.0233468
Ccny	0.0630285	1	0.0534323	1	0.0363929	1	1	0.0509512
Ccnyl1	-0.00828974	1	0.00266054	1	-0.0131795	1	1	-0.00626955
Ccp110	0.00683576	1	0.0210859	1	-0.00558667	1	1	0.00744499
Ccpg1os	0.0174711	1	0.0255327	1	0.0529577	1	1	0.0319872
Ccs	0.0940364	1	0.0425244	1	0.159395	1	1	0.0986519
Ccsap	0.00317988	1	0.0221358	1	0.028418	1	1	0.0179112
Ccser2	0.00405499	1	0.0108486	1	0.0164828	1	1	0.0104621
Cct2	-0.0403038	1	-0.0257226	1	-0.0189157	1	1	-0.028314
Cct3	0.0375599	1	0.0374632	1	0.0867181	1	1	0.0539137
Cct4	0.192222	1.77567e-11	0.141525	6.56424e-06	0.151583	0.187602	1.69504e-14	0.161777
Cct5	-0.0409255	1	-0.0282814	1	-0.0105059	1	1	-0.0265709
Cct7	0.070543	1	0.0578907	1	0.103976	1	1	0.07747
Cct8	-0.0260301	1	-0.0117608	1	-0.030934	1	1	-0.0229083
Ccz1	-0.0431143	1	-0.023546	1	-0.0217393	1	1	-0.0294665
Cd109	0.00917902	1	-0.000244763	1	0.0633864	1	1	0.0241069
Cd14	0.0562524	1	0.0234155	1	0.0440041	1	1	0.041224
Cd151	0.103222	1	0.0219693	1	0.0214938	1	1	0.0488949
Cd164	0.00754389	1	-0.0162175	1	0.0313853	1	1	0.00757058
Cd248	-0.0481368	1	-0.0680665	0.317599	-0.0884573	1	0.89078	-0.0682202
Cd24a	0.0761618	1	0.00607189	1	0.166721	1	1	0.0829849
Cd274	0.0345317	1	0.0219946	1	0.0372682	1	1	0.0312648
Cd276	0.0153804	1	0.0174232	1	0.0646257	1	1	0.0324764
Cd2ap	-0.199345	2.54611e-09	-0.105811	0.0638478	-0.171499	0.0849416	4.6762e-09	-0.158885
Cd2bp2	0.0225242	1	0.00755545	1	-0.0036845	1	1	0.00879839
Cd320	-0.0693848	1	-0.00668832	1	-0.130365	1	1	-0.0688126
Cd3eap	0.014009	1	0.0238261	1	-0.00184245	1	1	0.0119976
Cd44	0.260164	1.63126e-11	0.199982	9.53559e-07	0.221764	0.173752	2.32338e-15	0.227304
Cd47	0.124221	1	0.0817018	1	0.147489	1	1	0.117804
Cd63	0.00613445	1	-0.0394263	1	0.00865239	1	1	-0.00821317
Cd74	-0.022424	1	0.0237726	1	0.0353824	1	1	0.0122436
Cd81	-0.952034	1.34441e-131	-0.794065	4.55928e-111	-0.848295	6.31006e-56	9.03503e-292	-0.864798
Cd9	-0.0884402	1	-0.160672	0.0249888	-0.189836	0.972502	0.282532	-0.146316
Cd99l2	0.0313291	1	0.0205835	1	-0.00325111	1	1	0.0162205
Cda	0.193369	2.26826e-13	0.157159	8.0275e-07	0.210239	0.000867448	2.07104e-19	0.186922
Cdadc1	-0.0139528	1	0.0030621	1	-0.0250256	1	1	-0.0119721
Cdc123	0.170111	0.00029497	0.173324	4.01694e-06	0.230514	0.00251837	1.1329e-09	0.191316
Cdc14a	0.0190124	1	-0.00187228	1	-0.0567728	1	1	-0.0132109
Cdc14b	0.0234418	1	0.0237222	1	0.063259	1	1	0.0368077
Cdc16	-0.0459881	1	-0.04813	1	-0.111288	1	1	-0.0684686
Cdc20	-0.26611	1	-0.168742	1	-0.292874	1	1	-0.242575
Cdc23	0.0647629	1	0.030406	1	0.0663852	1	1	0.0538514
Cdc25a	-0.022614	1	0.020065	1	-0.063471	1	1	-0.0220067
Cdc25b	0.0376793	1	0.0508902	1	-0.00612258	1	1	0.0274823
Cdc25c	0.00883536	1	0.0318986	1	-0.0129582	1	1	0.00925859
Cdc26	-0.220396	6.24961e-16	-0.141919	5.18416e-06	-0.150864	1	3.76183e-18	-0.17106
Cdc27	0.0550581	1	0.0571129	1	0.103567	1	1	0.0719126
Cdc34	-0.00652714	1	0.00705464	1	0.0101687	1	1	0.00356539
Cdc37	0.0589416	1	0.0738704	1	0.0545484	1	1	0.0624535
Cdc37l1	0.0189787	1	0.0229276	1	0.0310469	1	1	0.0243177
Cdc40	-0.065019	1	-0.0389283	1	-0.0454202	1	1	-0.0497892
Cdc42	-0.167344	8.90078e-09	-0.169524	7.90166e-10	-0.227675	6.85025e-05	6.0451e-19	-0.188181
Cdc42bpa	-0.0102666	1	0.0269393	1	-0.0110186	1	1	0.00188469
Cdc42bpb	0.0201231	1	0.0355503	1	0.0115475	1	1	0.022407
Cdc42ep1	0.0434121	1	0.0355355	1	0.0979036	1	1	0.0589504
Cdc42ep2	0.0184165	1	-0.0174085	1	-0.0393933	1	1	-0.0127951
Cdc42ep3	-0.0933145	0.000787458	-0.0823566	0.0611255	-0.0657092	1	0.00290528	-0.0804601
Cdc42ep4	0.0108435	1	-0.00115962	1	-0.0129031	1	1	-0.00107309
Cdc42se1	0.0362236	1	0.0530959	1	0.137997	1	1	0.0757722
Cdc42se2	-0.0574751	0.445736	-0.00363313	1	-0.00742502	1	0.951416	-0.0228444
Cdc45	-0.0434843	1	-0.0106041	1	-0.0276736	1	1	-0.027254
Cdc5l	-0.0655087	1	-0.0302414	1	-0.0724714	1	1	-0.0560738
Cdc6	0.0179544	1	0.0141832	1	0.0138961	1	1	0.0153445
Cdc7	0.00103007	1	0.0201046	1	-0.0239674	1	1	-0.000944218
Cdc73	-0.0617665	1	-0.0621902	1	-0.0589971	1	1	-0.0609846
Cdca2	-0.0380278	1	0.0111466	1	0.0151718	1	1	-0.00390315
Cdca3	-0.0166293	1	0.0269376	1	0.00525111	1	1	0.00518644
Cdca4	-0.0278842	1	-0.00618709	1	-0.0320982	1	1	-0.0220565
Cdca5	-0.0199285	1	0.0209068	1	0.00611489	1	1	0.0023644
Cdca7	0.05076	1	0.0794439	1	0.0633148	1	1	0.0645062
Cdca7l	-0.019663	1	-0.00332891	1	-0.0626736	1	1	-0.0285552
Cdca8	-0.302491	0.00854628	-0.181206	1	-0.427169	0.0252502	0.00972546	-0.303622
Cdh15	-0.312361	5.99643e-06	-0.272363	9.23819e-07	-0.185611	1	2.00988e-09	-0.256778
Cdip1	0.0192364	1	0.0149889	1	-0.0175446	1	1	0.00556022
Cdipt	-0.0400239	1	-0.0351819	1	-0.0191317	1	1	-0.0314458
Cdk1	-0.136187	1	-0.00391465	1	-0.11734	1	1	-0.0858139
Cdk10	0.0185155	1	-0.00418451	1	0.00217801	1	1	0.00550301
Cdk11b	-0.138084	0.000425391	-0.0906157	1	-0.214423	0.0505667	0.00149489	-0.147708
Cdk12	0.10514	1	0.099423	1	0.112921	1	1	0.105828
Cdk13	0.0555887	1	0.0932079	1	0.0678288	1	1	0.0722085
Cdk14	-0.0284856	1	-0.0362223	1	-0.0168569	1	1	-0.0271883
Cdk16	0.0691087	1	0.0586381	1	0.0678502	1	1	0.065199
Cdk17	0.0120238	1	-0.0178241	1	-0.0151398	1	1	-0.00698004
Cdk18	0.000370334	1	0.00793674	1	-0.00786349	1	1	0.000147863
Cdk19	0.00902929	1	0.0177114	1	0.0119004	1	1	0.0128804
Cdk2	0.00963861	1	-0.00524054	1	0.0057115	1	1	0.00336986
Cdk2ap1	-0.0389898	1	-0.0497854	1	-0.0877918	1	1	-0.0588557
Cdk2ap2	-0.437237	3.60743e-37	-0.39437	1.67728e-28	-0.412568	3.23689e-13	3.08982e-73	-0.414725
Cdk4	0.0428671	1	0.0505477	1	0.118197	1	1	0.0705374
Cdk5	0.0522386	1	0.0366062	1	0.126038	1	1	0.0716276
Cdk5rap2	-0.105665	0.0896325	-0.0897034	0.0483007	-0.148933	1	0.0920062	-0.114767
Cdk5rap3	0.112972	0.531749	0.0913906	1	0.131633	1	0.97365	0.111998
Cdk6	-0.022896	1	-0.0114434	1	-0.0502143	1	1	-0.0281846
Cdk7	0.0171085	1	0.0117506	1	0.0260794	1	1	0.0183128
Cdk8	-0.00463502	1	0.0215304	1	-0.00367425	1	1	0.00440703
Cdk9	0.0977064	1	0.089508	1	0.162109	1	1	0.116441
Cdkal1	0.0181194	1	0.0110897	1	0.034037	1	1	0.021082
Cdkl2	0.036353	1	0.00405593	1	0.0370312	1	1	0.0258134
Cdkl5	0.0342585	1	0.0396125	1	0.0449455	1	1	0.0396055
Cdkn1a	-0.175805	1	-0.139151	1	-0.246422	1	1	-0.187126
Cdkn1b	0.037236	1	0.0183634	1	0.0532824	1	1	0.0362939
Cdkn2a	-0.109239	0.588603	-0.114323	0.731903	-0.316683	5.66658e-09	5.30858e-07	-0.180082
Cdkn2aip	0.0352387	1	-6.90371e-05	1	0.0666339	1	1	0.0339345
Cdkn2aipnl	0.00414164	1	0.0506127	1	-0.0439909	1	1	0.00358781
Cdkn2b	0.0725215	1	0.0361108	1	-0.00310605	1	1	0.0351754
Cdkn2c	-0.180732	5.46289e-11	-0.141629	4.12895e-07	-0.19668	0.00274633	6.33889e-17	-0.173014
Cdkn2d	-0.0346294	1	-0.0145507	1	-0.180727	1	1	-0.0766358
Cdkn3	-0.00749227	1	0.00623211	1	-0.0369588	1	1	-0.0127397
Cdpf1	-0.0029904	1	-0.00883061	1	0.0203786	1	1	0.00285252
Cdr2	-0.0647435	0.023024	-0.066407	0.0417726	-0.0885503	1	0.0308491	-0.0732336
Cdr2l	-0.0268164	1	0.00759389	1	-0.0644391	1	1	-0.0278872
Cds2	0.0573376	1	0.0512939	1	0.0625957	1	1	0.0570757
Cdt1	-0.0151187	1	-0.0160975	1	0.0134723	1	1	-0.00591461
Cdv3	-0.050633	1	-0.01114	1	-0.0649099	1	1	-0.0422276
Cdyl	0.0527197	1	0.0741547	1	0.00182055	1	1	0.0428983
Cebpb	0.491269	2.04708e-19	0.389455	2.36556e-22	0.596435	9.23679e-19	4.09759e-55	0.492386
Cebpd	-0.20061	3.54441e-07	-0.105484	2.94798e-05	-0.178298	0.11065	4.69661e-10	-0.161464
Cebpg	-0.0694292	1	0.0112148	1	-0.0782421	1	1	-0.0454855
Cebpz	-0.0409422	1	0.0262819	1	0.0876523	1	1	0.0243306
Cebpzos	-0.0516397	1	-0.0259019	1	-0.0754556	1	1	-0.0509991
Celf1	0.0784501	1	0.078641	1	0.0823196	1	1	0.0798036
Celf2	-0.0274834	1	0.00190877	1	-0.00524073	1	1	-0.0102718
Celf4	0.0621591	1	0.0701702	1	0.0537965	1	1	0.0620419
Cenpa	-0.257657	1	-0.100173	1	-0.260654	1	1	-0.206161
Cenpb	0.223997	2.02133e-09	0.170873	5.02716e-05	0.210614	0.404008	2.08092e-11	0.201828
Cenpc1	-0.0129978	1	-0.000830958	1	-0.0382159	1	1	-0.0173482
Cenpe	-0.252949	1	-0.123115	1	-0.266022	1	1	-0.214029
Cenpf	-0.141886	1	-0.00698543	1	-0.168276	1	1	-0.105716
Cenph	0.00543161	1	0.043846	1	0.0253478	1	1	0.0248751
Cenpi	0.0283498	1	0.0465624	1	-0.00135481	1	1	0.0245191
Cenpk	-0.0364261	1	0.0340098	1	-0.013239	1	1	-0.00521845
Cenpl	-0.0287273	1	-0.011953	1	-0.0328956	1	1	-0.0245253
Cenpm	0.00749339	1	0.00639598	1	-0.0282165	1	1	-0.00477569
Cenpn	-0.0315341	1	-0.00232611	1	-0.0469607	1	1	-0.0269403
Cenpp	0.0119952	1	0.068187	1	0.0169926	1	1	0.0323916
Cenpq	-0.0684435	1	0.0501683	1	-0.0966809	1	1	-0.0383187
Cenps	-0.0605253	1	-0.00351343	1	-0.0230607	1	1	-0.0290332
Cenpt	0.000269465	1	0.0102494	1	0.0237135	1	1	0.0114108
Cenpu	0.0340132	1	0.0301378	1	0.0196757	1	1	0.0279422
Cenpv	-0.0334035	1	0.144491	0.0219258	0.059052	1	0.265667	0.0567131
Cenpw	-0.0408362	1	-0.0286917	1	-0.158627	1	1	-0.0760515
Cenpx	-0.120296	0.377036	-0.0699589	1	-0.110948	1	0.924165	-0.100401
Cep104	-0.0568304	0.0370482	-0.0322642	1	0.0130404	1	0.360324	-0.0253514
Cep112	0.00263026	1	0.0183342	1	0.0221911	1	1	0.0143852
Cep120	0.0281797	1	0.028002	1	0.0319141	1	1	0.0293652
Cep131	0.0107309	1	0.0252001	1	0.065829	1	1	0.03392
Cep135	0.0124816	1	0.0212833	1	0.00776119	1	1	0.013842
Cep162	0.0181674	1	0.0100777	1	-0.0367047	1	1	-0.00281989
Cep164	0.0469104	1	0.0741044	1	0.0309555	1	1	0.0506568
Cep170	-0.00193464	1	-0.00432242	1	0.0137776	1	1	0.00250686
Cep170b	-0.0222451	1	-0.0136274	1	-0.038346	1	1	-0.0247395
Cep19	-0.014201	1	0.00526211	1	-0.00948234	1	1	-0.00614041
Cep192	0.0699922	1	0.0801766	1	0.0734092	1	1	0.074526
Cep250	0.0693612	1	0.0420732	1	0.0708042	1	1	0.0607462
Cep290	0.00650746	1	0.0155035	1	0.0514737	1	1	0.0244949
Cep295	-0.00804126	1	0.0354404	1	-0.0264642	1	1	0.000311638
Cep350	0.053319	1	0.0604382	1	0.0166626	1	1	0.0434733
Cep41	0.0170629	1	-0.00228008	1	0.017676	1	1	0.0108196
Cep44	-0.00786119	1	-0.000911486	1	-0.0024775	1	1	-0.00375006
Cep55	-0.0263984	1	0.00535984	1	-0.0406483	1	1	-0.0205623
Cep57	-0.0725603	1	0.0117417	1	-0.113973	1	1	-0.0582639
Cep57l1	0.0321447	1	0.00541662	1	0.00412571	1	1	0.0138957
Cep63	-0.00803025	1	-0.00434308	1	-0.0127262	1	1	-0.00836649
Cep68	-0.0161315	1	0.00362559	1	0.01417	1	1	0.000554716
Cep70	-0.0151043	1	-0.0049386	1	-0.0495692	1	1	-0.023204
Cep78	0.00297316	1	0.0263597	1	0.0323539	1	1	0.0205622
Cep83	0.0244188	1	0.0622391	1	0.0346941	1	1	0.0404507
Cep85	-0.00407564	1	-0.00802553	1	-0.0222804	1	1	-0.0114605
Cep89	-0.0103419	1	-0.0109143	1	-0.0582948	1	1	-0.026517
Cep95	0.0211271	1	0.0300888	1	0.0431449	1	1	0.0314536
Cept1	0.00869468	1	0.00126303	1	0.0741614	1	1	0.0280397
Cers2	-0.107714	0.498178	-0.0533866	1	-0.00197789	1	0.966247	-0.0543596
Cers5	-0.023436	1	-0.00281508	1	0.0622219	1	1	0.0119903
Cers6	0.0372985	1	0.0372628	1	0.0356008	1	1	0.0367207
Cetn2	0.0637025	1	0.0710423	1	0.0733987	1	1	0.0693812
Cetn3	0.127138	1	0.100519	1	0.161036	1	1	0.129564
Cetn4	0.0404272	1	0.018166	1	0.0715558	1	1	0.043383
Cfap20	-0.0834794	1	-0.033067	1	-0.115335	1	1	-0.0772938
Cfap36	0.206225	5.25666e-06	0.0602579	1	0.124771	1	0.000457542	0.130418
Cfap43	0.0199355	1	0.0213451	1	0.035077	1	1	0.0254525
Cfap97	-0.0258866	1	0.000731741	1	-0.0158383	1	1	-0.0136644
Cfdp1	-0.0886199	1	-0.0242655	1	-0.0725212	1	1	-0.0618022
Cfl1	0.0822575	1	0.0641177	1	0.212795	5.55384e-05	0.00326583	0.119723
Cfl2	0.0897369	1	0.00818227	1	0.0872749	1	1	0.0617313
Cflar	-0.0226287	1	-0.0508518	1	-0.0180845	1	1	-0.0305217
Cggbp1	-0.0346289	1	-0.017643	1	-0.0026457	1	1	-0.0183059
Cgref1	-0.0184592	1	-0.0269228	1	-0.0327886	1	1	-0.0260569
Cgrrf1	-0.032022	1	-0.0107443	1	0.0133477	1	1	-0.00980621
Chac2	0.0605742	1	0.0478113	1	0.100479	1	1	0.0696215
Chaf1a	-0.030292	1	0.0244691	1	-0.0639823	1	1	-0.0232684
Chaf1b	0.00376222	1	0.00676182	1	0.0284341	1	1	0.012986
Champ1	-0.0121792	1	0.00826813	1	-0.0294079	1	1	-0.0111063
Chchd1	0.0270016	1	0.0827953	1	-0.00179377	1	1	0.036001
Chchd10	-0.107066	0.00588399	-0.0893847	0.0578133	-0.274585	0.000769691	3.42998e-05	-0.157012
Chchd2	-0.00838314	1	0.0162296	1	0.0177763	1	1	0.00854092
Chchd3	-0.0426653	1	-0.0024211	1	-0.00518337	1	1	-0.0167566
Chchd4	0.0410263	1	0.0295473	1	0.00292752	1	1	0.0245004
Chchd5	0.0747902	1	0.0255837	1	0.139371	1	1	0.079915
Chchd6	0.0965489	1	0.125926	0.220769	0.120543	1	0.806172	0.114339
Chchd7	-0.164112	2.65502e-05	-0.146546	0.000594858	-0.148516	1	2.84775e-06	-0.153058
Chd1	-0.115064	1	-0.0466854	1	-0.147128	1	1	-0.102959
Chd1l	-0.0480245	1	-0.0197444	1	-0.0519545	1	1	-0.0399078
Chd2	0.07988	1	0.0398439	1	0.0372626	1	1	0.0523288
Chd3	0.195351	0.000449498	0.142229	0.171969	0.261593	0.0326642	0.000244809	0.199724
Chd4	0.0953994	1	0.103488	1	0.0880298	1	1	0.0956392
Chd6	0.132497	0.00167532	0.109041	0.559704	0.0641699	1	0.0302657	0.101903
Chd7	0.109181	1	0.110302	0.709645	0.247118	0.000221433	0.00756042	0.155534
Chd8	0.0260231	1	0.0248003	1	-0.0620845	1	1	-0.00375372
Chd9	-0.0133045	1	-0.00994482	1	-0.0723143	1	1	-0.0318546
Chek1	0.0260853	1	0.0338335	1	-0.0177775	1	1	0.0140471
Chek2	0.0237287	1	0.0196242	1	0.00484638	1	1	0.0160664
Cherp	-0.0602753	0.88659	-0.029294	1	-0.03228	1	0.999734	-0.0406164
Chfr	-0.000411594	1	0.0231929	1	0.0138982	1	1	0.0122265
Chic1	-0.00908701	1	-0.0115035	1	0.0111223	1	1	-0.0031561
Chic2	-0.0896825	1	-0.0572587	1	0.0125039	1	1	-0.0448124
Chid1	-0.00783104	1	-0.0250495	1	-0.00457526	1	1	-0.0124853
Chka	0.0439354	1	0.0301277	1	0.0963296	1	1	0.0567976
Chkb	0.027745	1	0.00311382	1	0.0199126	1	1	0.0169238
Chm	0.0484676	1	0.0350603	1	0.0266235	1	1	0.0367171
Chml	0.0132513	1	0.00573069	1	0.0234905	1	1	0.0141575
Chmp1a	-0.0362874	1	-0.0213231	1	-0.0253485	1	1	-0.027653
Chmp1b	0.0746767	1	0.0640898	1	0.11676	1	1	0.0851756
Chmp2a	0.0604264	1	0.0156237	1	-0.0623671	1	1	0.00456098
Chmp2b	-0.0464835	1	-0.0670648	1	-0.0741016	1	1	-0.0625499
Chmp3	-0.0308685	1	-0.0252209	1	0.0371318	1	1	-0.00631923
Chmp4b	0.261631	2.77231e-15	0.169231	6.23964e-07	0.284468	2.19216e-05	6.72204e-23	0.238443
Chmp5	-0.159964	1.44176e-05	-0.175022	2.40572e-07	-0.248847	0.000922238	1.89159e-12	-0.194611
Chmp6	-0.00362324	1	0.0066906	1	0.00670555	1	1	0.00325763
Chmp7	-0.011448	1	0.031492	1	0.0478648	1	1	0.0226363
Chordc1	0.0519157	1	0.0578632	1	0.0208415	1	1	0.0435401
Chp1	0.0751439	1	0.0427849	1	0.0577702	1	1	0.0585663
Chpf	-0.0320797	1	-0.0106756	1	-0.0847185	1	1	-0.0424913
Chpf2	0.0138014	1	0.00345718	1	-0.024605	1	1	-0.00244881
Chpt1	-0.0780368	0.196724	-0.0521284	1	-0.0775222	1	0.77663	-0.0692291
Chrac1	-0.0754133	1	-0.0489862	1	-0.109561	1	1	-0.0779867
Chrnb1	-0.0189163	1	0.00654707	1	0.0393444	1	1	0.00899172
Chst11	-0.0723092	0.642501	-0.0274861	1	-0.0480581	1	0.989606	-0.0492845
Chst12	0.0220188	1	-0.0125254	1	0.0261921	1	1	0.0118952
Chst14	0.0797031	1	0.0462984	1	0.0478317	1	1	0.0579444
Chst15	0.076587	1	0.0574893	1	0.0605157	1	1	0.064864
Chst2	0.0716188	9.71907e-06	0.0585666	0.00321199	0.0590549	1	5.23271e-06	0.0630801
Chsy1	0.00887778	1	0.0135059	1	0.0252295	1	1	0.0158711
Chtf18	-0.00969583	1	0.0183196	1	-0.0153628	1	1	-0.00224633
Chtf8	0.0038927	1	0.0161358	1	0.0296968	1	1	0.0165751
Chtop	-0.0592488	1	-0.0128996	1	0.0139377	1	1	-0.0194035
Chuk	0.00352988	1	0.0220907	1	0.0492265	1	1	0.024949
Churc1	0.0211787	1	-0.0132831	1	0.0122036	1	1	0.00669974
Ciao1	0.0765495	1	0.0441785	1	0.0997533	1	1	0.0734938
Ciapin1	-0.175854	5.24552e-05	-0.10752	1	-0.164289	1	0.00311697	-0.149221
Cib1	-0.0493632	1	-0.0389073	1	-0.0120259	1	1	-0.0334321
Cic	0.0402362	1	0.0144832	1	0.00348183	1	1	0.0194004
Cinp	-0.00623133	1	0.00631609	1	-0.0879491	1	1	-0.0292881
Cipc	0.0201061	1	0.0165149	1	0.0163118	1	1	0.0176442
Cir1	0.103753	1	0.0986167	1	0.145717	1	1	0.116029
Cirbp	-0.0165801	1	-0.0321205	1	-0.00511685	1	1	-0.0179392
Cisd1	-0.100151	0.260731	-0.0675894	1	-0.156733	1	0.8468	-0.108158
Cisd2	-0.376037	4.42287e-37	-0.278313	8.69192e-23	-0.432622	2.21982e-16	1.25575e-70	-0.362324
Cisd3	0.112014	1	0.048724	1	0.0641987	1	1	0.0749789
Cit	-0.020391	1	-0.00126713	1	-0.0647665	1	1	-0.0288082
Cited2	0.06517	1	-0.0255932	1	0.269397	1	1	0.102991
Ciz1	0.0626121	1	0.0567691	1	0.0768155	1	1	0.0653989
Ckap2	-0.0863089	1	-0.00955188	1	-0.112008	1	1	-0.0692896
Ckap2l	0.052364	1	0.126899	1	0.0266719	1	1	0.0686448
Ckap4	-0.0472632	1	0.00566105	1	-0.0134582	1	1	-0.0183535
Ckap5	0.147547	0.656114	0.165573	0.0697444	0.110879	1	0.404563	0.141333
Cklf	0.00149518	1	0.0136283	1	0.0385961	1	1	0.0179065
Cks1b	-0.258885	0.00908428	-0.00739547	1	-0.18781	1	0.152179	-0.151363
Cks2	-0.0807243	1	0.0615521	1	-0.0253652	1	1	-0.0148458
Clasp1	0.0265317	1	0.0570925	1	0.0476142	1	1	0.0437461
Clasp2	0.0153545	1	0.0403631	1	-0.0155984	1	1	0.0133731
Clasrp	0.0369995	1	-0.00117482	1	-0.0166639	1	1	0.00638694
Clcc1	-0.0595869	1	-0.0184555	1	-0.0655905	1	1	-0.0478777
Clcf1	0.0992852	1	0.0108599	1	0.0939138	1	1	0.0680196
Clcn3	-0.0775179	1	-0.0469211	1	-0.123864	1	1	-0.0827675
Clcn4	0.0208256	1	0.0139624	1	0.0314561	1	1	0.0220814
Clcn5	0.0427231	1	0.064655	1	0.0687275	1	1	0.0587019
Cldn12	-0.00351899	1	-0.013745	1	0.0201237	1	1	0.000953212
Cldnd1	-0.0502869	1	-0.0495033	1	-0.0835977	1	1	-0.0611293
Clec16a	-0.00227068	1	-0.0107834	1	0.0194033	1	1	0.00211641
Clic1	0.150277	1.92238e-06	0.119557	0.0013827	0.183138	0.000284202	3.16099e-10	0.150991
Clic4	-0.149841	0.0166722	-0.149757	0.00951691	-0.224129	0.00298139	5.75324e-05	-0.174576
Clint1	-0.0463263	1	-0.0241115	1	-0.0740202	1	1	-0.0481527
Clip1	-0.00478914	1	-0.00867687	1	-0.0257392	1	1	-0.0130684
Clip2	0.025158	1	0.0246426	1	0.0632066	1	1	0.0376691
Clip4	0.0997265	1	0.101341	1	0.177719	0.198193	0.778563	0.126262
Clk1	0.0411242	1	0.0312861	1	0.00632972	1	1	0.0262467
Clk2	0.0157246	1	-0.00436072	1	-0.00703243	1	1	0.00144382
Clk3	-0.00654168	1	-0.00237285	1	-0.00565451	1	1	-0.00485635
Clk4	0.00716164	1	0.0549379	1	-0.00976511	1	1	0.0174448
Cln3	0.00571897	1	0.00138664	1	0.00875202	1	1	0.00528588
Cln5	-0.008279	1	-0.00778074	1	0.0537067	1	1	0.012549
Cln6	0.012642	1	0.0011919	1	-0.0255861	1	1	-0.00391739
Clns1a	-0.040034	1	0.023397	1	-0.00115153	1	1	-0.00592949
Clock	-0.0242301	1	0.0326106	1	0.0139497	1	1	0.00744338
Clp1	0.0256418	1	0.0114933	1	0.0496652	1	1	0.0289334
Clpb	0.0181816	1	0.015215	1	-0.0295669	1	1	0.00127654
Clpp	-0.0641483	1	-0.029223	1	-0.0179994	1	1	-0.0371236
Clptm1	-0.000616978	1	0.00556563	1	0.0435646	1	1	0.0161711
Clptm1l	0.0162998	1	-0.0039983	1	0.0407535	1	1	0.017685
Clpx	0.019563	1	0.0323262	1	0.0218257	1	1	0.0245716
Clspn	-0.0773054	1	-0.0348296	1	-0.15368	1	1	-0.0886051
Clstn1	-0.0214897	1	-0.0445601	1	-0.0848836	1	1	-0.0503111
Clta	-0.291166	2.1459e-25	-0.291761	2.03304e-27	-0.289809	1.48913e-10	6.53997e-58	-0.290912
Cltb	-0.044389	1	0.0274042	1	-0.119446	1	1	-0.0454769
Cltc	-0.0286125	1	-0.0505073	1	-0.0958248	1	1	-0.0583149
Clu	0.0138072	1	-0.0509381	1	0.122931	1	1	0.0286001
Cluap1	0.00854541	1	-0.000740488	1	0.0247531	1	1	0.0108527
Cluh	0.0182095	1	0.0322734	1	0.00370021	1	1	0.018061
Clybl	0.036237	1	0.00557277	1	0.00968695	1	1	0.0171656
Cmas	-0.0887035	0.523956	-0.0379875	1	0.0464519	1	0.972059	-0.0267464
Cmc1	0.0540708	1	0.000906609	1	0.0562323	1	1	0.0370699
Cmc2	-0.0840062	1	-0.0484368	1	-0.12095	1	1	-0.0844642
Cmc4	-0.00674833	1	0.012563	1	0.0113719	1	1	0.00572885
Cmip	-0.0694808	1	-0.0612407	1	-0.144906	1	1	-0.091876
Cmpk1	-0.252717	4.18842e-17	-0.243342	1.24951e-16	-0.25912	6.24589e-06	1.24617e-34	-0.251726
Cmss1	0.0516535	1	0.0671071	1	-0.00284908	1	1	0.0386372
Cmtm3	0.0140319	1	0.0208456	1	0.0338171	1	1	0.0228982
Cmtm4	-0.040367	1	-0.00198778	1	-0.0520463	1	1	-0.031467
Cmtm6	-0.00883437	1	-0.0133286	1	-0.0031374	1	1	-0.00843344
Cmtm7	-0.0560489	1	-0.0120259	1	-0.0863553	1	1	-0.0514767
Cnbp	-0.0767796	1	-0.0478217	1	0.0151475	1	1	-0.0364846
Cndp2	0.0456198	1	0.0568125	1	0.108827	1	1	0.0704198
Cnep1r1	-0.0521709	1	-0.0323141	1	-0.0747216	1	1	-0.0530689
Cnih1	-0.0216364	1	-0.00407031	1	-0.0622171	1	1	-0.0293079
Cnih4	-0.0907325	1	0.000985539	1	-0.044889	1	1	-0.0448787
Cnn2	0.0357642	1	0.0118929	1	-0.0121973	1	1	0.0118199
Cnn3	-0.210542	6.70268e-08	-0.15143	0.000101461	-0.173136	0.989814	2.40709e-09	-0.178369
Cnnm3	0.0157013	1	0.0256441	1	-0.0217568	1	1	0.00652953
Cnnm4	0.0446203	1	0.0250266	1	0.0746263	1	1	0.0480911
Cnot1	-0.0497665	1	0.00491081	1	-0.0686758	1	1	-0.0378438
Cnot10	-0.0107822	1	-0.00391488	1	-0.0515969	1	1	-0.022098
Cnot11	-0.0330439	1	-0.0250148	1	-0.0467395	1	1	-0.0349327
Cnot2	-0.0046039	1	0.00229471	1	0.0155144	1	1	0.00440173
Cnot3	-0.0550754	1	-0.0569933	1	-0.188366	0.0325966	0.33522	-0.100145
Cnot4	0.0282627	1	0.0122168	1	-0.0417199	1	1	-0.000413486
Cnot6	-0.0250703	1	0.0204767	1	-0.0193994	1	1	-0.00799766
Cnot6l	-0.0214891	1	-0.0166039	1	-0.0454051	1	1	-0.0278327
Cnot7	-0.0381575	1	0.00192236	1	-0.0140292	1	1	-0.0167548
Cnot8	0.0425554	1	0.0121386	1	0.0115359	1	1	0.0220766
Cnot9	-0.0138147	1	-0.021854	1	0.00715385	1	1	-0.00950495
Cnp	0.0698191	1	0.0460213	1	0.0974306	1	1	0.0710903
Cnppd1	0.0478173	1	0.0224954	1	0.02479	1	1	0.0317009
Cnpy2	0.0840035	1	0.0157103	1	0.138061	1	1	0.0792581
Cnpy3	-0.0943486	0.0170352	-0.0319758	1	-0.0486445	1	0.227675	-0.058323
Cnpy4	0.00568153	1	-0.0203189	1	-0.0408314	1	1	-0.0184896
Cnst	-0.00523141	1	0.00310999	1	0.0110819	1	1	0.00298684
Cntln	-0.117537	4.68821e-07	-0.0984056	0.0576934	-0.13076	0.57242	2.79754e-06	-0.115568
Cntrl	0.0335359	1	0.0678689	1	0.0175357	1	1	0.0396468
Coa3	0.357255	1.4586e-29	0.261882	2.29129e-18	0.376114	1.91587e-11	5.63732e-54	0.331751
Coa4	0.0226113	1	-0.0245301	1	0.0606783	1	1	0.0195865
Coa5	0.0157163	1	0.00851619	1	-0.0516076	1	1	-0.00912505
Coa6	-0.0191305	1	0.0250715	1	-0.0343284	1	1	-0.00946245
Coa7	0.0128845	1	-0.00537757	1	-0.0430919	1	1	-0.0118617
Coasy	0.161405	4.30107e-05	0.0817304	1	0.143616	0.0661225	0.000271061	0.128917
Cobll1	0.0323721	1	0.00357447	1	-0.0688742	1	1	-0.0109759
Cog1	-0.0166927	1	-0.00923075	1	0.0184408	1	1	-0.00249421
Cog2	0.0078487	1	0.00454846	1	0.0305826	1	1	0.0143266
Cog4	-0.0140139	1	-1.23872e-05	1	-0.0374866	1	1	-0.0171709
Cog5	0.00776882	1	0.000786677	1	-0.012951	1	1	-0.00146515
Cog6	-0.0561273	1	-0.029781	1	-0.0634956	1	1	-0.0498013
Cog7	0.0207563	1	0.0141183	1	0.00397951	1	1	0.0129514
Cog8	-0.00462914	1	-0.0105535	1	-0.0413332	1	1	-0.0188386
Coil	-0.00922086	1	0.0020217	1	-0.000417918	1	1	-0.00253903
Col12a1	-0.0142208	1	-0.032839	1	0.0352614	1	1	-0.0039328
Col16a1	-0.0549545	1	-0.063646	0.694265	-0.101372	1	0.993825	-0.0733243
Col18a1	0.0406596	1	0.0789672	1	0.160436	1	1	0.0933544
Col1a1	-0.3101	4.48632e-21	-0.251345	1.08532e-08	-0.215027	0.345333	3.80369e-26	-0.258824
Col1a2	-0.340636	1.13338e-05	-0.49411	1.72918e-13	-0.487613	0.00032165	7.82486e-19	-0.440787
Col23a1	-0.010662	1	-0.00401753	1	0.0154921	1	1	0.000270856
Col3a1	-0.464367	1.28119e-17	-0.497306	6.78828e-20	-0.417616	3.80316e-06	1.54064e-38	-0.459763
Col4a1	0.221818	1.18924e-14	0.22882	2.82208e-13	0.247891	1.88818e-05	1.68124e-28	0.232843
Col4a2	0.120252	1.3414e-05	0.139106	0.000230118	0.148498	1	6.56254e-07	0.135952
Col4a3bp	0.0637085	1	0.0418697	1	0.129132	1	1	0.0782368
Col4a5	0.158108	1	0.0868926	1	0.172415	1	1	0.139139
Col5a1	0.189307	0.406084	0.127879	1	0.0662163	1	0.936946	0.127801
Col5a3	0.11288	0.000471683	0.0746178	1	0.216929	1.97498e-10	4.48213e-11	0.134809
Col6a1	-0.287215	0.000250426	-0.240172	9.24911e-05	-0.11624	1	4.00989e-06	-0.214542
Col6a2	-0.238982	7.32406e-06	-0.172116	0.000384085	-0.0763773	1	6.03451e-07	-0.162492
Col6a3	-0.23736	1	-0.0624097	1	-0.0376591	1	1	-0.112476
Col7a1	0.133414	0.113536	0.133853	0.00838668	0.190666	0.156702	0.0072545	0.152644
Col8a1	-0.205139	1.0895e-08	-0.277722	5.55943e-15	-0.392951	3.52868e-11	6.21037e-30	-0.291937
Colgalt1	-0.0271216	1	0.017051	1	-0.00693335	1	1	-0.00566798
Commd1	-0.0418436	1	0.0211637	1	0.00194347	1	1	-0.00624549
Commd10	-8.96095e-06	1	0.0237297	1	0.0534738	1	1	0.0257315
Commd2	-0.00233516	1	-0.0152342	1	0.0150332	1	1	-0.000845392
Commd3	0.169908	0.00241881	0.10708	1	0.234437	0.00496676	0.000919138	0.170475
Commd4	0.0543444	1	0.0120688	1	0.0611805	1	1	0.0425312
Commd6	-0.091914	0.26566	-0.0990162	0.0194893	-0.117694	1	0.104148	-0.102875
Commd7	-0.146236	1	-0.0587716	1	-0.303353	0.0385088	0.368162	-0.169454
Commd8	0.00867492	1	0.0334763	1	-0.0133878	1	1	0.00958779
Commd9	0.0444585	1	0.0375283	1	0.122974	1	1	0.0683201
Comt	-0.0652506	1	-0.0857625	1	-0.0366121	1	1	-0.0625417
Comtd1	0.0931281	1	0.0860663	1	0.145847	1	1	0.108347
Cop1	-0.0590511	1	0.000888903	1	0.0180043	1	1	-0.013386
Copa	-0.0494944	1	-0.0228349	1	-0.00305123	1	1	-0.0251269
Copb1	-0.00383678	1	-0.00556385	1	0.0263039	1	1	0.00563443
Copb2	-0.0443214	1	-0.039872	1	-0.109788	1	1	-0.0646604
Cope	-0.0365427	1	-0.102153	0.224653	-0.0511626	1	0.810552	-0.0632862
Copg1	-0.00824338	1	-0.0677888	1	-0.039395	1	1	-0.0384757
Copg2	-0.0121522	1	-0.00664613	1	0.0645063	1	1	0.015236
Coprs	-0.0580134	0.699006	-0.0142778	1	-0.0438919	1	0.994135	-0.0387277
Cops2	0.162591	5.92347e-05	0.0732545	1	0.227001	0.0164344	0.000107715	0.154282
Cops3	0.00580775	1	-0.00898425	1	-0.0125768	1	1	-0.00525108
Cops4	-0.030537	1	-0.0827776	1	-0.0613562	1	1	-0.0582236
Cops5	0.0332486	1	-0.0102774	1	0.0616182	1	1	0.0281965
Cops6	0.115783	1	0.0357636	1	0.0488027	1	1	0.0667833
Cops7a	-0.000994734	1	-0.0531568	1	-0.070962	1	1	-0.0417045
Cops7b	-0.00465735	1	0.000817002	1	-0.0132444	1	1	-0.00569493
Cops8	-0.0286175	1	-0.0174572	1	-0.104378	1	1	-0.0501509
Cops9	-0.132913	0.00133263	-0.0596542	1	-0.0705928	1	0.0393617	-0.0877199
Copz1	-0.0296858	1	-0.0139332	1	-0.0200247	1	1	-0.0212146
Copz2	0.109986	0.643964	0.0779632	1	0.0222814	1	0.989748	0.070077
Coq10a	0.00953988	1	-0.00487376	1	-0.00361114	1	1	0.000351659
Coq10b	-0.0487806	1	-0.0481062	1	-0.0878123	1	1	-0.0615664
Coq2	0.0199301	1	0.0180799	1	0.0229835	1	1	0.0203312
Coq3	0.0709615	1	0.016945	1	0.0475394	1	1	0.0451486
Coq4	0.100763	0.00399609	0.0500441	1	0.105481	1	0.0869992	0.0854293
Coq5	0.0502284	1	0.0301907	1	0.0338905	1	1	0.0381032
Coq6	0.0290823	1	-0.00211557	1	0.0343225	1	1	0.0204298
Coq7	0.00124042	1	0.0277246	1	-0.00723368	1	1	0.00724378
Coq8b	0.0144742	1	0.0214441	1	0.0638279	1	1	0.0332488
Coq9	-0.0529115	1	-0.0258838	1	-0.0417602	1	1	-0.0401852
Coro1b	0.110337	1	0.0504323	1	0.0943607	1	1	0.0850432
Coro1c	0.0143242	1	0.0220219	1	0.0541332	1	1	0.0301598
Cotl1	-0.198129	0.000782898	-0.0670497	1	-0.0159143	1	0.0264085	-0.0936977
Cox10	-0.0095671	1	0.0115046	1	-0.00590282	1	1	-0.00132178
Cox11	-0.0518944	1	-0.0238708	1	-0.0650732	1	1	-0.0469461
Cox14	-0.113742	0.496417	-0.103258	0.516736	-0.11183	1	0.842946	-0.10961
Cox16	0.0755342	1	0.0515883	1	0.0335026	1	1	0.0535417
Cox17	0.0748765	1	0.0170583	1	0.0429709	1	1	0.0449686
Cox18	0.0558359	1	0.0441865	1	0.0478923	1	1	0.0493049
Cox19	-0.0331813	1	-0.0316594	1	-0.0386115	1	1	-0.0344841
Cox20	-0.0769911	1	-0.046392	1	-0.13998	1	1	-0.0877877
Cox4i1	-0.101268	0.0701524	-0.122423	2.9726e-06	-0.193926	6.31451e-05	4.4756e-09	-0.139206
Cox5a	0.0383379	1	0.0538014	1	0.129616	1	1	0.0739184
Cox5b	-0.0373752	1	-0.00371198	1	0.037001	1	1	-0.00136204
Cox6a1	0.0546481	1	0.014332	1	0.0398481	1	1	0.0362761
Cox6b1	0.0641425	1	0.0647928	1	0.0235764	1	1	0.0508372
Cox6c	-0.14579	2.02158e-06	-0.0981724	0.603345	-0.146959	0.778648	0.000105434	-0.130307
Cox7a2	-0.150258	1.55871e-05	-0.0815596	1	-0.0971245	1	0.00114302	-0.109647
Cox7a2l	-0.136981	0.0147315	-0.109243	0.0729441	-0.138426	1	0.0335269	-0.128217
Cox7b	0.562323	9.41321e-66	0.440966	2.9591e-61	0.595206	1.03917e-39	2.0884e-160	0.532831
Cox7c	0.113742	0.013404	0.139125	1.42211e-07	0.185295	8.68021e-06	8.87224e-12	0.146054
Cox8a	0.000737322	1	0.0147082	1	0.0804646	1	1	0.03197
Cp	0.528972	4.76712e-28	0.498478	2.27191e-29	0.57487	1.42192e-14	2.01462e-66	0.534107
Cpd	-0.0917529	0.0116134	-0.0773341	0.0972986	-0.0723535	1	0.0348115	-0.0804802
Cpe	-0.31524	1.2571e-12	-0.244641	1.32976e-07	-0.294381	0.000863246	1.89881e-19	-0.284754
Cpeb2	0.0202507	1	0.0132682	1	0.110346	0.0636226	0.4803	0.047955
Cpne3	0.0654971	1	0.0924026	1	0.0920997	1	1	0.0833331
Cpne8	0.105366	1	0.043099	1	0.0833924	1	1	0.0772857
Cpox	-0.0519357	0.425535	-0.0588894	1	-0.125821	0.210986	0.567001	-0.0788819
Cpq	-0.0681059	0.723224	-0.0556272	1	-0.0709292	1	0.995544	-0.0648874
Cpsf1	0.0275426	1	0.0213899	1	0.0460311	1	1	0.0316546
Cpsf2	0.0281597	1	-0.00862683	1	-0.0387182	1	1	-0.00639511
Cpsf3	0.00292999	1	0.0274861	1	-0.00291785	1	1	0.00916608
Cpsf4	-0.00178742	1	0.0124199	1	-0.0281198	1	1	-0.0058291
Cpsf6	0.0454953	1	0.0603831	1	0.078764	1	1	0.0615475
Cpsf7	-0.0124219	1	-0.0151035	1	-0.032702	1	1	-0.0200758
Cpt1a	-0.0117344	1	-0.00117851	1	-0.0136588	1	1	-0.00885724
Cpt2	-0.00843585	1	-0.0145672	1	-0.0589172	1	1	-0.0273068
Cptp	-0.0125982	1	-0.0243965	1	-0.00657012	1	1	-0.0145216
Cr1l	-0.0303695	1	0.00209586	1	0.00275493	1	1	-0.00850623
Crabp2	-0.601136	6.60957e-37	-0.363776	5.5587e-22	-0.353411	2.19822e-07	8.91502e-61	-0.439441
Cradd	-0.0385809	1	-0.0249924	1	-0.0342828	1	1	-0.0326187
Cramp1l	0.00176782	1	-0.0132819	1	-0.00775638	1	1	-0.00642349
Crat	0.0344385	1	0.0221933	1	0.0298974	1	1	0.0288431
Crbn	0.0406222	1	0.0102687	1	0.0730159	1	1	0.0413023
Crcp	-0.0767751	0.0446434	-0.03853	1	-0.0174037	1	0.399207	-0.0442363
Creb1	-0.0107616	1	0.027867	1	0.038896	1	1	0.0186671
Creb3	-0.0848739	0.0288247	-0.047268	1	-0.00648537	1	0.312328	-0.0462091
Creb3l2	-0.0504263	1	-0.0481668	1	-0.0247322	1	1	-0.0411084
Creb5	-0.0358915	1	-0.0284966	1	-0.0377838	1	1	-0.0340573
Crebbp	0.0500053	1	0.0487355	1	0.0279177	1	1	0.0422195
Crebrf	-0.00925927	1	0.0376985	1	-0.0163759	1	1	0.00402111
Crebzf	0.015515	1	0.0154831	1	0.0607035	1	1	0.0305672
Creg1	0.0797403	1	0.0581074	1	0.0365397	1	1	0.0581292
Creld2	-0.190593	4.60202e-08	-0.085053	1	-0.130215	1	7.39089e-06	-0.135287
Crem	0.00955694	1	0.0130445	1	0.0722804	1	1	0.0316273
Crim1	-0.105647	0.00883716	-0.11165	3.43451e-05	-0.154523	1	3.90395e-05	-0.12394
Crip1	-0.236597	0.577907	-0.245703	0.758791	-0.0966341	1	0.94901	-0.192978
Crip2	-0.362373	7.55402e-23	-0.191941	7.21256e-12	-0.25028	0.00120674	2.33721e-33	-0.268198
Cript	-0.0574505	1	-0.0244151	1	-0.0260372	1	1	-0.0359676
Crk	-0.158886	0.000279719	-0.119483	0.0523228	-0.196552	0.18072	0.000254742	-0.158307
Crkl	-0.00545173	1	0.00166517	1	-0.0270695	1	1	-0.0102853
Crlf2	0.100198	0.752747	0.046567	1	0.0794737	1	0.996909	0.0754128
Crlf3	-0.0292927	1	-0.0118474	1	-0.0410714	1	1	-0.0274038
Crls1	0.0490841	1	0.0653521	1	0.030876	1	1	0.0484374
Crnkl1	0.0776203	1	0.082351	1	0.104249	1	1	0.0880735
Crot	0.00889402	1	-0.0290309	1	-0.0440027	1	1	-0.0213798
Crtap	0.0413692	1	0.0358165	1	0.0198798	1	1	0.0323552
Crtc1	-0.0122285	1	-0.00962579	1	0.00476709	1	1	-0.00569572
Crtc2	-0.0408888	1	0.00109118	1	-0.00791846	1	1	-0.0159053
Crtc3	-0.0231866	1	-0.00909509	1	-0.00599425	1	1	-0.0127586
Cry1	-0.0554462	0.0451907	-0.0359689	0.338571	-0.0523016	1	0.212913	-0.0479056
Cryab	-0.199418	0.95364	-0.220984	0.0118492	-0.248879	1	0.175503	-0.223093
Crybg1	-0.0314049	1	-0.0250027	1	-0.0870502	1	1	-0.0478193
Cryz	-0.0738275	0.047283	-0.0880445	0.0130571	-0.0632116	1	0.0220381	-0.0750279
Cryzl1	-0.032363	1	0.00491358	1	0.0335913	1	1	0.00204728
Cs	0.0475586	1	0.0243741	1	0.0115821	1	1	0.0278383
Csad	0.0323743	1	0.00107473	1	-0.0255524	1	1	0.00263222
Csde1	-0.0289359	1	0.00326406	1	-0.0308115	1	1	-0.0188278
Cse1l	0.0607847	1	0.0723808	1	0.0517989	1	1	0.0616548
Csf1	0.160829	0.000769803	0.123957	0.0088634	0.106918	1	0.000570703	0.130568
Csgalnact2	-0.0272284	1	-0.0208314	1	-0.0323293	1	1	-0.0267964
Csk	-0.0234274	1	-0.0220853	1	0.0237621	1	1	-0.0072502
Csnk1a1	0.171861	7.58028e-05	0.177016	1.308e-07	0.210686	0.819098	2.86354e-09	0.186521
Csnk1d	0.042141	1	0.0564091	1	0.011034	1	1	0.0365281
Csnk1e	0.110796	1	0.102493	1	0.203337	0.0924742	0.574726	0.138875
Csnk1g1	0.0287408	1	0.00998409	1	0.0925768	1	1	0.0437672
Csnk1g2	-0.0414073	1	-0.0364741	1	-0.0979133	1	1	-0.0585982
Csnk1g3	0.123963	1	0.100841	1	0.0736268	1	1	0.0994767
Csnk2a1	0.0724052	1	0.0779647	1	0.0878009	1	1	0.0793902
Csnk2a2	-0.0640024	1	-0.0587502	1	-0.0459698	1	1	-0.0562408
Csnk2b	-0.0287247	1	-0.00208945	1	0.0184088	1	1	-0.0041351
Cspg5	0.0115999	1	0.038686	1	0.0468478	1	1	0.0323779
Cspp1	0.041346	1	0.0794074	1	0.032504	1	1	0.0510858
Csrnp1	0.00283389	1	0.00224932	1	0.0367588	1	1	0.0139474
Csrp1	-0.170567	0.00382044	-0.0698266	1	0.0271662	1	0.0842992	-0.0710758
Csrp2	-0.575419	1.96641e-24	-0.660508	1.46959e-35	-0.72969	1.66933e-18	7.53346e-73	-0.655206
Cst3	-0.0160593	1	-0.100719	1	-0.276544	0.260973	0.847019	-0.131107
Cstb	0.18479	5.12391e-05	0.0846457	1	0.163418	1	0.00305776	0.144284
Cstf1	0.0373191	1	0.0507992	1	0.046385	1	1	0.0448344
Cstf2	0.0520274	1	0.0538501	1	0.0677154	1	1	0.0578643
Cstf2t	0.00828465	1	0.0110817	1	0.0125051	1	1	0.0106238
Cstf3	0.0124311	1	0.0180779	1	-0.0188344	1	1	0.00389151
CT025619.1	0.0820046	1	0.0405135	1	0.0425975	1	1	0.0550385
Ctbp1	-0.0181438	1	0.0183123	1	-0.0153367	1	1	-0.00505607
Ctbp2	-0.00940642	1	-0.0326107	1	0.00800269	1	1	-0.0113381
Ctbs	-0.0277509	1	-0.0103481	1	-0.0261608	1	1	-0.02142
Ctc1	0.015217	1	0.0335276	1	0.0444319	1	1	0.0310588
Ctcf	-0.0365343	1	-0.0094661	1	-0.10609	1	1	-0.0506969
Ctdnep1	-0.0869066	1	-0.0448465	1	-0.0420334	1	1	-0.0579288
Ctdp1	0.0214821	1	0.0448292	1	0.0377387	1	1	0.0346833
Ctdsp1	-0.0148733	1	-0.014633	1	-0.0323385	1	1	-0.0206149
Ctdsp2	0.0548376	1	0.0498418	1	0.0729192	1	1	0.0591995
Ctdspl	0.0167862	1	0.0331565	1	-0.0054504	1	1	0.0148308
Ctdspl2	0.0604355	1	0.0921252	1	0.0481329	1	1	0.0668979
Ctif	0.0088706	1	0.00588469	1	0.0324493	1	1	0.0157349
Ctnna1	0.208568	4.95924e-06	0.198899	8.96964e-09	0.253935	0.00345249	1.07556e-13	0.220467
Ctnnal1	-0.110274	8.03696e-06	-0.101295	7.12848e-05	-0.164532	0.0702576	1.25343e-08	-0.125367
Ctnnb1	0.083596	1	0.0154136	1	0.0658386	1	1	0.0549494
Ctnnbip1	-0.147112	1.50678e-05	-0.126823	0.000492175	-0.202861	0.0579179	1.09598e-07	-0.158932
Ctnnbl1	0.105814	0.020256	0.104157	0.326174	0.0950721	1	0.123009	0.101681
Ctnnd1	0.0662421	1	0.0353138	1	0.0654973	1	1	0.0556844
Ctps	-0.207834	1.61105e-10	-0.080167	1	-0.19001	0.12457	6.60258e-09	-0.159337
Ctps2	0.0759457	0.46359	0.0821548	0.0477614	0.0991001	0.014452	0.013256	0.0857335
Ctr9	-0.0313709	1	0.0268658	1	-0.0303253	1	1	-0.0116102
Ctsa	0.10835	1	0.011111	1	0.068262	1	1	0.0625743
Ctsb	0.137316	1	0.087509	1	0.0949595	1	1	0.106595
Ctsc	-0.0242626	1	-0.0460322	1	-0.015172	1	1	-0.0284889
Ctsd	-0.0504554	1	-0.0703841	1	-0.0114556	1	1	-0.0440984
Ctsl	0.295923	7.35318e-07	0.246348	2.67887e-13	0.456791	5.38105e-17	3.52361e-32	0.333021
Ctss	0.0162043	1	0.0359397	1	-0.0206094	1	1	0.0105115
Ctsz	0.0999924	0.848708	0.0503206	1	0.0721214	1	0.999349	0.0741448
Cttn	0.0334235	1	0.0446373	1	0.110935	1	1	0.0629987
Cttnbp2nl	0.0638774	1	0.0496705	1	0.16523	1	1	0.092926
Ctu2	-0.0216383	1	0.0141072	1	-0.000192905	1	1	-0.00257468
Ctxn1	0.198838	1.95723e-06	0.145524	0.000749494	0.299294	1.69839e-09	2.15015e-15	0.214552
Cuedc1	0.0379856	1	0.0420265	1	0.0832459	1	1	0.0544193
Cuedc2	0.0206929	1	-0.0171086	1	0.0765353	1	1	0.0267065
Cul1	0.014085	1	0.0265051	1	0.00414642	1	1	0.0149122
Cul2	0.0212318	1	0.0321246	1	0.0212667	1	1	0.0248743
Cul3	-0.0137634	1	-0.0457339	1	-0.183043	0.280417	0.863629	-0.0808468
Cul4a	0.0178649	1	0.0149058	1	0.0121509	1	1	0.0149739
Cul4b	0.159496	0.0211301	0.100379	0.998397	0.0571859	1	0.259553	0.105687
Cul5	-0.0348079	1	0.003774	1	-0.0501436	1	1	-0.0270591
Cul7	-0.0442151	1	-0.0187096	1	0.0231295	1	1	-0.0132651
Cuta	-0.183747	9.3683e-06	-0.10323	1	-0.202871	0.270721	0.000245743	-0.163283
Cutc	0.0285129	1	0.00239549	1	0.0477854	1	1	0.0262312
Cux1	0.050479	1	0.0590611	1	0.0749815	1	1	0.0615072
Cwc15	-0.0335285	1	-0.0173569	1	-0.0811035	1	1	-0.0439963
Cwc22	0.089786	1	0.0429032	1	0.0542153	1	1	0.0623015
Cwc25	0.071416	1	0.0365244	1	0.057387	1	1	0.0551091
Cwc27	-0.0144657	1	-0.00153406	1	-0.0030544	1	1	-0.0063514
Cwf19l2	0.0376258	1	0.0221869	1	-0.0225896	1	1	0.0124077
Cx3cl1	-0.0354443	1	-0.042037	1	-0.0649306	1	1	-0.0474707
Cxadr	-0.00126688	1	0.0188251	1	0.0150467	1	1	0.0108683
Cxcl1	-0.0763514	1	-0.047013	1	0.0493043	1	1	-0.0246867
Cxcl10	0.212349	1	0.166796	1	0.271177	1	1	0.216774
Cxcl2	-0.053751	1	-0.0308819	1	-0.0683096	1	1	-0.0509808
Cxcr6	0.0181103	1	-0.00836015	1	-0.0544424	1	1	-0.0148974
Cxxc1	0.0199439	1	0.0491537	1	0.0689872	1	1	0.0460283
Cyb561d2	0.0043718	1	0.0290386	1	0.0353678	1	1	0.0229261
Cyb5a	0.0606143	1	0.137572	0.246741	0.167948	1	0.833639	0.122045
Cyb5b	-0.0163677	1	0.00025038	1	-0.0441911	1	1	-0.0201028
Cyb5r1	-0.0571609	1	-0.0111491	1	-0.0421147	1	1	-0.0368083
Cyb5r3	-0.0534692	1	-0.0823196	1	-0.0996148	1	1	-0.0784679
Cyb5r4	-0.0121144	1	0.0124651	1	0.0284055	1	1	0.00958542
Cyc1	0.0118441	1	0.028039	1	-0.0531694	1	1	-0.00442879
Cycs	-0.0172939	1	0.0189729	1	-0.00623549	1	1	-0.0015188
Cyfip1	-0.0285115	1	-0.0160093	1	-0.0234058	1	1	-0.0226422
Cyhr1	-0.0312988	1	-0.0366244	1	-0.0107512	1	1	-0.0262248
Cyld	-0.0311517	1	-0.0212525	1	-0.070904	1	1	-0.0411027
Cyp20a1	0.0241191	1	-0.00584418	1	-0.041053	1	1	-0.0075927
Cyp4f13	0.0272763	1	0.0111448	1	0.0213535	1	1	0.0199248
Cyp4f16	-0.0644231	1.62564e-05	-0.0386649	1	-0.0567095	1	0.00118387	-0.0532658
Cyp51	-0.0255474	1	0.0149406	1	-0.0583984	1	1	-0.0230018
Cyr61	-0.313897	4.00744e-05	-0.232285	0.00948232	-0.17351	1	4.752e-05	-0.239897
Cystm1	-0.0956045	0.00103781	-0.0377495	1	-0.101801	1	0.0326634	-0.0783851
Cyth1	0.0134748	1	0.0345415	1	0.083212	1	1	0.0437428
Cyth2	0.0272856	1	0.0450146	1	-0.0106747	1	1	0.0205418
Cyth3	0.00483076	1	-0.01172	1	-0.0245779	1	1	-0.0104891
D030056L22Rik	-0.00678244	1	0.0265454	1	0.0782595	1	1	0.0326742
D10Jhu81e	0.0052771	1	0.0045068	1	-0.00579347	1	1	0.00133014
D10Wsu102e	-0.00515693	1	0.0307839	1	-0.0436607	1	1	-0.00601123
D16Ertd472e	-0.0268585	1	-0.0321754	1	-0.0342178	1	1	-0.0310839
D17Wsu92e	-0.0149703	1	3.65829e-05	1	-0.10777	1	1	-0.0409013
D1Ertd622e	-0.0065269	1	0.00399538	1	-0.0604249	1	1	-0.0209855
D230025D16Rik	-0.00730755	1	-0.00309702	1	-0.00836851	1	1	-0.0062577
D3Ertd254e	0.00637041	1	0.00383769	1	0.0117483	1	1	0.00731878
D3Ertd751e	-0.0582031	1	-0.0368215	1	-0.0537161	1	1	-0.0495802
D430042O09Rik	-0.0106004	1	-0.0269963	1	-0.0199727	1	1	-0.0191898
D5Ertd579e	0.0540035	1	0.0392398	1	0.0926163	1	1	0.0619532
D5Ertd605e	0.0336837	1	0.0332009	1	0.00262522	1	1	0.02317
D6Wsu163e	0.00479145	1	0.0185449	1	0.0328171	1	1	0.0187178
D8Ertd738e	-0.117376	0.0419861	-0.052428	1	-0.106166	1	0.386112	-0.09199
Daam1	0.0589983	1	0.0329768	1	0.0335289	1	1	0.0418346
Dab2	-0.0689528	0.00357572	-0.0217742	1	-0.0692327	1	0.0804617	-0.0533199
Dab2ip	0.0659451	1	0.091906	1	0.0689147	1	1	0.0755886
Dad1	-0.121935	0.015998	-0.0600067	1	-0.0892272	1	0.218942	-0.0903897
Dag1	-0.0198834	1	0.0256084	1	-0.0307913	1	1	-0.00835543
Dalrd3	-0.00502197	1	-0.00772674	1	0.032246	1	1	0.0064991
Dap	-0.275635	5.93966e-15	-0.287397	1.00168e-17	-0.388178	2.63199e-11	7.40732e-39	-0.31707
Dap3	0.028482	1	0.0161561	1	0.0422396	1	1	0.0289592
Dapk3	-0.0619011	1	-0.0606025	1	0.00300879	1	1	-0.0398316
Dapp1	-0.00145948	1	-0.0149911	1	-0.0308475	1	1	-0.015766
Dars	0.0468131	1	0.0715799	1	0.0920465	1	1	0.0701465
Dars2	0.00305079	1	0.0203151	1	0.0355109	1	1	0.0196256
Daxx	-0.00146136	1	-0.0109939	1	0.0310665	1	1	0.00620375
Dazap1	-0.0381027	1	-0.0152108	1	-0.0719682	1	1	-0.0417606
Dazap2	-0.0431658	1	-0.0396868	1	-0.0692876	1	1	-0.0507134
Dbf4	-0.113523	0.834808	0.026469	1	-0.116085	1	0.999143	-0.067713
Dbi	-0.385401	6.00657e-18	-0.330022	4.84382e-13	-0.320736	0.000453093	3.87917e-30	-0.345386
Dbn1	0.134238	0.000356566	0.128015	2.80499e-06	0.279679	4.07057e-18	7.76795e-24	0.180644
Dbnl	0.151102	0.016577	0.102636	1	0.164736	1	0.22385	0.139491
Dbp	0.0249697	1	0.0186874	1	0.0299476	1	1	0.0245349
Dbr1	0.0521998	1	0.0481027	1	0.104805	1	1	0.0683693
Dbt	-0.0446927	1	-0.0253966	1	-0.0572507	1	1	-0.0424467
Dcaf1	0.0396152	1	0.0278633	1	0.0052945	1	1	0.0242577
Dcaf10	-0.057241	0.314042	-0.0396094	1	-0.0528403	1	0.888417	-0.0498969
Dcaf11	-0.0439726	1	-0.011588	1	-0.0140988	1	1	-0.0232198
Dcaf12	-0.0731337	0.124669	-0.0647223	1	-0.104491	0.809056	0.597636	-0.0807823
Dcaf13	-0.0216034	1	0.02705	1	0.0477233	1	1	0.0177233
Dcaf15	-0.0125416	1	-0.00948909	1	-0.00512122	1	1	-0.00905063
Dcaf17	0.0496842	1	0.0437387	1	0.0530798	1	1	0.0488342
Dcaf4	0.0155099	1	0.0162922	1	0.0220816	1	1	0.0179612
Dcaf5	0.0561921	1	-0.014389	1	-0.0050166	1	1	0.0122622
Dcaf6	-0.00562744	1	-0.000772191	1	-0.0459598	1	1	-0.0174532
Dcaf7	-0.0150427	1	-0.0169872	1	-0.0549672	1	1	-0.028999
Dcaf8	0.0615323	1	0.0393216	1	0.0451005	1	1	0.0486515
Dcakd	0.0989256	1	0.0321411	1	0.0779611	1	1	0.0696759
Dcbld1	-0.00421472	1	-0.00249641	1	-0.0204747	1	1	-0.00906195
Dcbld2	0.00321112	1	-0.00366179	1	0.0250749	1	1	0.00820809
Dck	-0.00893654	1	0.000781387	1	-0.00218418	1	1	-0.00344644
Dclk1	0.120615	1	0.0886154	1	0.162734	0.0551391	0.44645	0.123988
Dclre1a	0.00241946	1	0.0336302	1	0.0029377	1	1	0.0129958
Dcp2	0.051099	1	0.0754526	1	0.0440629	1	1	0.0568715
Dcps	0.023913	1	0.0515655	1	0.00362835	1	1	0.0263689
Dctd	0.0384566	1	0.0124751	1	0.00601634	1	1	0.0189827
Dctn1	-0.026995	1	0.00312894	1	-0.0150563	1	1	-0.0129741
Dctn2	-0.0650541	1	-0.0684294	1	-0.00941315	1	1	-0.0476322
Dctn3	-0.17688	1.58404e-08	-0.165128	1.80567e-07	-0.180264	0.85781	1.47338e-12	-0.17409
Dctn4	0.116358	1	0.14469	0.020236	0.220492	0.00320344	0.00370444	0.160513
Dctn5	-0.00230583	1	0.0160781	1	-0.0015096	1	1	0.00408756
Dctn6	0.0325938	1	-0.021176	1	-0.0296817	1	1	-0.00608797
Dctpp1	-0.0294703	1	0.0613069	1	-0.0483074	1	1	-0.00549027
Dcun1d1	0.0255001	1	-0.00675032	1	-0.054752	1	1	-0.0120007
Dcun1d2	-0.015367	1	0.0139693	1	-0.00485003	1	1	-0.00208257
Dcun1d4	0.0277988	1	0.0138645	1	0.0201766	1	1	0.0206133
Dcun1d5	-0.03754	1	-0.0143812	1	-0.0462742	1	1	-0.0327318
Dcxr	-0.0202934	1	-0.0220094	1	-0.0396122	1	1	-0.027305
Dda1	-0.0923277	0.221883	-0.0243693	1	0.0060355	1	0.807439	-0.0368872
Ddah1	-0.164583	1.47769e-14	-0.135771	1.91255e-11	-0.141103	0.0899372	4.56644e-23	-0.147152
Ddah2	0.161937	0.0462662	0.0687377	1	0.170664	1	0.40696	0.13378
Ddb1	0.068443	1	0.0397244	1	0.0964722	1	1	0.0682132
Ddhd1	-0.0245332	1	-0.013949	1	-0.054331	1	1	-0.0309377
Ddhd2	0.0275495	1	-0.0195881	1	-0.0825055	1	1	-0.024848
Ddi2	-0.0292661	1	-0.0157688	1	-0.0420992	1	1	-0.0290447
Ddit3	0.000490664	1	-0.0473122	1	0.0225011	1	1	-0.00810684
Ddit4	-0.0903393	1	-0.0332213	1	-0.0872661	1	1	-0.0702756
Ddost	-0.296679	1.504e-19	-0.258602	1.42871e-15	-0.24476	0.00100176	7.85594e-34	-0.26668
Ddr2	-0.0188913	1	-0.0261904	1	-0.0480552	1	1	-0.0310456
Ddrgk1	0.292669	9.31353e-26	0.23082	3.57778e-15	0.319683	1.62186e-07	3.12495e-43	0.281057
Ddt	0.0742644	1	0.0145599	1	-0.0223119	1	1	0.0221708
Ddx1	-0.0292085	1	-0.00979047	1	-0.0158945	1	1	-0.0182978
Ddx10	0.00876912	1	0.0383086	1	0.0606438	1	1	0.0359072
Ddx11	0.000567556	1	0.0100702	1	-0.0344655	1	1	-0.00794259
Ddx17	0.0566351	1	0.0303381	1	0.0406831	1	1	0.0425521
Ddx18	-0.0630958	1	-0.0121326	1	-0.0502854	1	1	-0.041838
Ddx19a	-0.00965414	1	-0.00049382	1	0.00951095	1	1	-0.000212334
Ddx20	0.00519881	1	-0.000372818	1	-0.0442724	1	1	-0.0131488
Ddx21	-0.00741937	1	0.0509472	1	-0.0676651	1	1	-0.00804576
Ddx23	-0.00783896	1	-0.00353417	1	-0.0279727	1	1	-0.0131153
Ddx24	0.0186325	1	-0.0279998	1	-0.0174588	1	1	-0.00894201
Ddx27	0.216384	1.43415e-05	0.204229	9.45541e-09	0.226078	1	6.36757e-11	0.215564
Ddx28	0.0205256	1	0.0139132	1	0.027915	1	1	0.0207846
Ddx31	0.0162055	1	0.00631727	1	0.00802188	1	1	0.0101816
Ddx39	-0.214642	5.28534e-06	-0.135868	1	-0.276215	0.0101028	8.43412e-06	-0.208909
Ddx39b	0.175903	6.6819e-05	0.141429	0.02358	0.215112	0.0677509	1.55744e-05	0.177481
Ddx3x	-0.0250613	1	0.0208026	1	-0.0357354	1	1	-0.0133314
Ddx41	0.0987758	1	0.100592	1	0.096989	1	1	0.0987855
Ddx42	0.016937	1	0.0396037	1	0.0363024	1	1	0.0309477
Ddx46	-0.0162306	1	0.0174186	1	-0.0150466	1	1	-0.00461953
Ddx47	-0.057658	1	-0.0309063	1	-0.0370568	1	1	-0.0418737
Ddx49	0.0112143	1	0.0107523	1	0.00482026	1	1	0.00892896
Ddx5	0.404433	9.84724e-32	0.29533	1.10982e-26	0.420423	2.7571e-19	4.60841e-72	0.373395
Ddx50	-0.0378848	1	-0.0447569	1	-0.072397	1	1	-0.0516796
Ddx51	0.00639502	1	0.0092568	1	0.0530932	1	1	0.022915
Ddx52	-0.0627422	1	-0.0506493	1	-0.0562073	1	1	-0.0565329
Ddx54	-0.0149196	1	0.0106645	1	-0.0508244	1	1	-0.0183598
Ddx55	0.040355	1	0.0514615	1	0.100047	1	1	0.0639546
Ddx56	0.110029	0.0282634	0.0991141	1	0.148449	0.901289	0.290525	0.119198
Ddx58	0.0251762	1	-0.015694	1	-0.00373432	1	1	0.00191596
Ddx59	-0.00615758	1	-0.00523264	1	-0.0251022	1	1	-0.0121641
Ddx6	0.0362342	1	0.0833442	1	0.0584921	1	1	0.0593568
Ddx60	0.0125501	1	0.0123702	1	0.0500098	1	1	0.0249767
Deaf1	-0.0207784	1	-0.00512272	1	-0.0107836	1	1	-0.0122282
Decr1	0.189341	8.2885e-07	0.0765111	1	0.104925	1	9.37002e-05	0.123593
Decr2	-0.00750041	1	-0.00275272	1	0.0179279	1	1	0.00255826
Dedd	0.0091167	1	0.0101283	1	-0.0422583	1	1	-0.0076711
Def6	-0.0385198	1	-0.00560005	1	-0.00120772	1	1	-0.0151092
Def8	0.000499542	1	-0.00745142	1	0.000341169	1	1	-0.00220357
Degs1	-0.0750619	1	-0.0636499	1	-0.0555715	1	1	-0.0647611
Dek	0.0144508	1	0.122346	1	-0.0319773	1	1	0.0349399
Dennd1a	0.0380203	1	0.0242578	1	0.0171192	1	1	0.0264658
Dennd1b	0.00213052	1	-0.0493402	1	-0.0997025	1	1	-0.0489707
Dennd4a	-0.0332425	1	-0.0494463	1	-0.0452612	1	1	-0.04265
Dennd4c	-0.030176	1	-0.0142844	1	-0.0330238	1	1	-0.025828
Dennd5a	0.0121039	1	0.0163622	1	-0.0220706	1	1	0.00213186
Dennd5b	-0.0997632	0.793098	-0.0564635	1	-0.240057	0.25361	0.782385	-0.132095
Dennd6a	0.00610742	1	0.00869396	1	-0.0199594	1	1	-0.00171936
Denr	-0.0156256	1	-0.0124838	1	-0.0112174	1	1	-0.0131089
Depdc1a	-0.0506932	1	-0.0298564	1	-0.059996	1	1	-0.0468485
Depdc5	-0.00146823	1	0.00489795	1	0.0180761	1	1	0.00716861
Depdc7	0.0627239	1	0.0309903	1	-0.0175463	1	1	0.0253893
Deptor	0.0228114	1	0.00759601	1	0.0196712	1	1	0.0166929
Dera	-0.0832565	0.103485	-0.0558212	1	-0.0992014	1	0.604454	-0.0794264
Derl1	0.0111946	1	-0.0141769	1	-0.0634592	1	1	-0.0221472
Derl2	-0.00879044	1	-0.00531958	1	0.0148706	1	1	0.000253536
Desi1	-0.0365161	1	-0.00234117	1	-0.0507371	1	1	-0.0298648
Desi2	-0.0278025	1	-0.0416887	1	-0.00810003	1	1	-0.0258637
Det1	0.00538375	1	0.00617422	1	-0.0295615	1	1	-0.00600119
Dexi	-0.0427838	1	-0.0236649	1	-0.0128334	1	1	-0.0264274
Dgat1	0.0287235	1	0.0224948	1	0.0273804	1	1	0.0261996
Dgcr14	0.0107013	1	0.000790272	1	0.0186377	1	1	0.0100431
Dgcr2	-0.0228631	1	-0.00762218	1	-0.0145452	1	1	-0.0150102
Dgcr6	0.0423929	1	0.0399086	1	0.0522722	1	1	0.0448579
Dgcr8	0.0104688	1	0.0213746	1	0.02367	1	1	0.0185045
Dgkd	0.0128706	1	0.022825	1	0.00249518	1	1	0.0127303
Dgkz	0.085879	1	0.067224	1	0.0555301	1	1	0.0695444
Dguok	-0.0431379	1	-0.022425	1	-0.0661936	1	1	-0.0439188
Dhcr7	-0.0318446	1	-0.0135381	1	-0.0298619	1	1	-0.0250815
Dhdds	-0.00444516	1	-0.0158988	1	-0.0164746	1	1	-0.0122728
Dhfr	-0.0239259	1	0.0548507	1	0.0028395	1	1	0.0112548
Dhodh	0.000406559	1	-0.00445081	1	0.00271955	1	1	-0.000441566
Dhps	-0.0768618	1	-0.0941448	1	-0.0710913	1	1	-0.0806993
Dhrs1	0.043446	1	-0.0191546	1	-0.0846146	1	1	-0.0201077
Dhrs13	-0.0748887	0.0567536	-0.0192884	1	-0.0544343	1	0.453162	-0.0495371
Dhrs4	0.0373226	1	0.0317889	1	0.00653406	1	1	0.0252152
Dhrs7	0.186915	9.51712e-08	0.13213	1.78893e-05	0.15214	0.606531	4.22816e-10	0.157062
Dhrs7b	0.020951	1	0.0023029	1	-0.0443576	1	1	-0.00703457
Dhx15	-0.0500686	1	0.00285372	1	0.012854	1	1	-0.0114536
Dhx16	-0.0346789	1	0.000489566	1	0.011696	1	1	-0.00749776
Dhx29	0.0330154	1	0.0511912	1	0.0146211	1	1	0.0329426
Dhx30	0.0249371	1	0.0411233	1	0.0629997	1	1	0.04302
Dhx32	0.0395833	1	0.061132	1	0.0346033	1	1	0.0451062
Dhx33	-0.00155211	1	0.00517181	1	0.0138429	1	1	0.00582087
Dhx34	0.00728408	1	0.0155237	1	0.0303855	1	1	0.0177311
Dhx36	-0.027648	1	-0.013714	1	0.00572532	1	1	-0.0118789
Dhx37	-0.0130847	1	-0.00843462	1	0.0445468	1	1	0.00767585
Dhx38	-0.0338705	1	-0.0533037	1	-0.057419	1	1	-0.0481977
Dhx40	-0.0492916	1	-0.0771349	1	-0.0810772	1	1	-0.0691679
Dhx57	-0.00183657	1	0.020185	1	0.0583834	1	1	0.0255773
Dhx8	0.0742767	1	0.0586157	1	0.0956545	1	1	0.0761823
Dhx9	0.0547521	1	0.0881982	1	0.0847549	1	1	0.0759017
Diablo	0.0126066	1	-0.0149019	1	0.00419794	1	1	0.0006342
Diaph1	0.118729	1	0.118527	0.218599	0.120091	1	0.803679	0.119115
Diaph2	0.0610418	1	0.0317922	1	-0.0363368	1	1	0.0188324
Diaph3	-0.0575891	1	-0.00704982	1	-0.155674	1	1	-0.0734377
Dicer1	-0.000248277	1	-0.0161371	1	-0.0657483	1	1	-0.0273779
Dido1	0.0914875	1	0.0618008	1	0.144868	1	1	0.0993853
Diexf	-0.0215303	1	0.000109866	1	-0.0485569	1	1	-0.0233258
Dimt1	0.0567728	1	0.0795919	1	0.0929475	1	1	0.0764374
Dip2a	-0.00056903	1	-0.0186381	1	-0.0474928	1	1	-0.0222333
Dip2b	-0.0204873	1	0.000637286	1	-0.00722643	1	1	-0.00902548
Dip2c	0.0420457	1	0.0431108	1	-0.00674399	1	1	0.0261375
Dirc2	0.00152061	1	-0.0215137	1	-0.0309382	1	1	-0.0169771
Dis3	-0.0658304	1	-0.0238663	1	-0.057625	1	1	-0.0491072
Dis3l	-0.0297185	1	-0.0130967	1	-0.0513426	1	1	-0.0313859
Dis3l2	-0.0207064	1	0.00489116	1	-0.0302094	1	1	-0.0153415
Disp1	0.00409975	1	-0.00627005	1	0.00844984	1	1	0.00209318
Dixdc1	0.012529	1	-0.0145967	1	-0.00976712	1	1	-0.00394495
Dkc1	0.0616227	1	0.176616	0.017991	0.129861	1	0.235494	0.1227
Dlat	0.045674	1	0.0400209	1	0.052967	1	1	0.0462207
Dlc1	-0.132322	5.71311e-19	-0.120946	5.78144e-16	-0.160237	4.58958e-06	6.19291e-36	-0.137835
Dld	0.062352	1	0.0404441	1	0.057879	1	1	0.0535584
Dlg1	-0.00724641	1	0.0314453	1	-0.0328516	1	1	-0.00288426
Dlg3	0.0335558	1	0.0250657	1	-0.00309898	1	1	0.0185075
Dlg5	0.0445484	1	0.0392382	1	0.0714902	1	1	0.0517589
Dlgap4	0.149637	0.000864336	0.0948159	1	0.0825953	1	0.0284624	0.109016
Dlgap5	-0.0200154	1	0.0455242	1	-0.00273373	1	1	0.00759169
Dlk2	0.100983	1	0.0644573	1	0.00331509	1	1	0.0562518
Dlst	0.00233475	1	0.0204645	1	0.00939786	1	1	0.0107324
Dmac1	-0.0929376	0.125346	-0.087549	0.143855	-0.0547213	1	0.235822	-0.0784026
Dmac2	-0.0126505	1	0.00261133	1	0.0130597	1	1	0.00100682
Dmap1	-0.0321066	1	-0.0337648	1	-0.068391	1	1	-0.0447541
Dmrta2	-0.053979	1	-0.0472526	1	-0.068237	1	1	-0.0564895
Dmtf1	-0.021838	1	-0.0407827	1	-0.058404	1	1	-0.0403416
Dmwd	0.0114021	1	0.0163699	1	-0.038999	1	1	-0.00374236
Dmxl1	0.0202721	1	0.0513545	1	0.024468	1	1	0.0320315
Dnaaf5	0.00686643	1	0.0167789	1	0.00542895	1	1	0.00969142
[truncated: 6,604 more rows]

## Sheet: Clone2448_FindMarkers_by_sample
gene	logFC.DV1	adj.p.DV1	logFC.DV2	adj.p.DV2	logFC.DV3	adj.p.DV3	fisher.combined.pvalue	mean.logFC
0610009B22Rik	-0.028177	1	-0.0904063	1	-0.0125955	1	1	-0.0437263
0610009O20Rik	-0.00953955	1	-0.0106623	1	0.0662542	1	1	0.0153508
0610010F05Rik	-0.00503098	1	0.11818	1	0.0391454	1	1	0.0507647
0610010K14Rik	0.072253	1	0.160799	1	0.0722685	1	1	0.101774
0610012G03Rik	-0.134872	1	-0.0806731	1	-0.0684046	1	1	-0.0946498
0610030E20Rik	0.00394506	1	0.00580581	1	0.0339271	1	1	0.0145593
0610037L13Rik	0.000225125	1	0.0527077	1	0.153895	1	1	0.0689428
1110002L01Rik	-0.0106188	1	0.0374288	1	0.0503215	1	1	0.0257105
1110004E09Rik	-0.0775132	1	-0.136913	1	0.0652599	1	1	-0.0497222
1110004F10Rik	-0.00477779	1	0.0596249	1	-0.139339	1	1	-0.028164
1110008F13Rik	-0.0906476	1	-0.226059	1	-0.0118249	1	1	-0.109511
1110008L16Rik	-0.0129767	1	-0.061688	1	0.0233386	1	1	-0.0171087
1110008P14Rik	0.0850395	1	0.0233844	1	0.107372	1	1	0.0719321
1110012L19Rik	-0.160612	0.0762984	-0.202262	1	-0.140823	1	0.525203	-0.167899
1110032A03Rik	-0.00705383	1	0.0344458	1	0.0519726	1	1	0.0264548
1110038F14Rik	0.0476863	1	-0.083411	1	0.0367616	1	1	0.000345626
1110046J04Rik	0.0523066	1	-0.0323486	1	0.0223233	1	1	0.0140938
1110059E24Rik	-0.103829	1	0.0194184	1	-0.0308717	1	1	-0.0384275
1110059G10Rik	0.00579614	1	-0.0336246	1	-0.0792046	1	1	-0.0356777
1110065P20Rik	0.0839853	1	0.191846	1	0.0925688	1	1	0.1228
1190002N15Rik	-0.0207908	1	-0.00521616	1	-0.0254423	1	1	-0.0171497
1190007I07Rik	0.0213197	1	0.0159214	1	0.0229045	1	1	0.0200486
1300002E11Rik	-0.00486284	1	-0.0340865	1	-0.0248789	1	1	-0.0212761
1500011B03Rik	-0.0572533	1	-0.0413188	1	-0.0103979	1	1	-0.0363234
1500011K16Rik	0.0162956	1	0.079198	1	0.0775477	1	1	0.0576804
1600002K03Rik	0.000301596	1	-0.00479286	1	0.0208507	1	1	0.00545313
1600012H06Rik	-0.0356531	1	0.163432	1	0.0224892	1	1	0.0500892
1600020E01Rik	0.021573	1	-0.0359471	1	0.0150472	1	1	0.00022438
1700012B09Rik	0.544922	8.54557e-11	0.36207	1	-0.0369101	1	2.50308e-08	0.290027
1700017B05Rik	-0.0257273	1	-0.0534716	1	0.0207865	1	1	-0.0194708
1700020I14Rik	-0.0130776	1	-0.0485123	1	-0.0264745	1	1	-0.0293548
1700021F05Rik	0.00179081	1	-0.0200759	1	-0.0527972	1	1	-0.0236941
1700025G04Rik	0.0355756	1	0.135785	1	0.0442982	1	1	0.0718864
1700037H04Rik	-0.0570154	1	-0.0719788	1	-0.0504917	1	1	-0.0598286
1700052K11Rik	-0.08567	1	-0.100991	1	0.00825662	1	1	-0.0594682
1700086O06Rik	0.00488714	1	-0.0663434	1	0.0037236	1	1	-0.0192442
1700123O20Rik	0.00988514	1	0.0053146	1	0.0613231	1	1	0.0255076
1810009A15Rik	-0.0329105	1	-0.0443614	1	-0.0670884	1	1	-0.0481201
1810013L24Rik	0.0218141	1	0.0175528	1	-0.00404699	1	1	0.0117733
1810022K09Rik	-0.0004981	1	-0.237906	1	-0.0615056	1	1	-0.0999698
1810030O07Rik	-0.137734	1	-0.00199509	1	-0.0482553	1	1	-0.0626615
1810032O08Rik	0.0822549	1	0.0584623	1	0.0232052	1	1	0.0546408
1810037I17Rik	-0.127708	1	-0.145	1	-0.149391	1	1	-0.1407
1810043G02Rik	-0.0240847	1	-0.0650937	1	-0.079166	1	1	-0.0561148
1810055G02Rik	-0.108119	1	-0.0391571	1	-0.00219382	1	1	-0.0498235
1810058I24Rik	-0.130017	1	0.219221	1	0.0141254	1	1	0.0344429
1810062G17Rik	0.0244528	1	-0.0197951	1	0.0516758	1	1	0.0187778
2010107E04Rik	0.0274858	1	0.118514	1	0.0733469	1	1	0.0731157
2010111I01Rik	0.160688	1	0.0760604	1	0.13417	1	1	0.123639
2010320M18Rik	-0.0614882	1	0.0490475	1	0.0101218	1	1	-0.000772968
2200002D01Rik	-0.189854	1	-0.149515	1	-0.328517	0.779511	0.997861	-0.222629
2210016L21Rik	-0.064027	1	-0.0162261	1	-0.02506	1	1	-0.0351044
2210408I21Rik	-0.00259198	1	0.0276568	1	0.0209704	1	1	0.0153451
2300009A05Rik	-0.0386847	1	0.0701317	1	-0.0438028	1	1	-0.00411859
2310009B15Rik	0.165228	1	0.19876	1	0.183164	1	1	0.182384
2310011J03Rik	-0.0531974	1	-0.0227859	1	0.0445924	1	1	-0.0104636
2310022A10Rik	-0.0199953	1	0.0394629	1	-0.0373216	1	1	-0.00595134
2310022B05Rik	0.0916876	1	0.187766	1	0.114947	1	1	0.131467
2310030G06Rik	0.00763202	1	-0.0567452	1	0.054998	1	1	0.0019616
2310033P09Rik	-0.0772945	1	0.0768045	1	0.0430053	1	1	0.0141717
2310035C23Rik	-0.0162087	1	-0.0576797	1	0.00227634	1	1	-0.0238707
2310039H08Rik	-0.075088	1	-0.0367528	1	-0.172555	1	1	-0.0947984
2310057M21Rik	-0.0203665	1	0.0133488	1	-0.0126824	1	1	-0.00656669
2310061I04Rik	0.00284974	1	0.0125874	1	0.00580544	1	1	0.00708084
2410002F23Rik	0.0275093	1	-0.0252943	1	0.0802572	1	1	0.0274908
2410004B18Rik	0.0748387	1	-0.0637534	1	0.0683613	1	1	0.0264822
2410015M20Rik	0.0314094	1	-0.166877	1	-0.116821	1	1	-0.0840962
2410089E03Rik	-0.0335258	1	-0.0363134	1	-0.0384307	1	1	-0.03609
2410131K14Rik	0.0147046	1	0.0123558	1	-0.0158746	1	1	0.00372858
2510002D24Rik	0.0637726	1	0.0904284	1	0.0279793	1	1	0.0607268
2510039O18Rik	0.0649037	1	0.0653638	1	-0.0216964	1	1	0.0361904
2610001J05Rik	0.034186	1	0.1124	1	0.0819524	1	1	0.0761795
2610002M06Rik	-0.170038	0.125248	-0.206484	1	-0.240291	1	0.65572	-0.205605
2610044O15Rik8	-0.0044858	1	0.0101888	1	0.0495398	1	1	0.0184143
2610301B20Rik	-0.0165037	1	-0.0376213	1	-0.0185194	1	1	-0.0242148
2610507B11Rik	-0.0500895	1	0.103833	1	0.0907981	1	1	0.0481804
2610524H06Rik	-0.16266	0.625004	-0.257321	1	-0.0848225	1	0.987785	-0.168268
2700016F22Rik	-0.00823256	1	0.0729612	1	0.0314128	1	1	0.0320472
2700049A03Rik	-0.00250219	1	0.133857	1	-0.00123539	1	1	0.043373
2700062C07Rik	0.00142026	1	-0.0543688	1	0.0487863	1	1	-0.00138742
2700081O15Rik	-0.0621794	1	-0.148886	1	-0.0702166	1	1	-0.0937608
2700097O09Rik	0.0386488	1	-0.027978	1	-0.0292009	1	1	-0.00617671
2810004N23Rik	-0.0992614	1	-0.0282954	1	-0.102024	1	1	-0.0765271
2810006K23Rik	-0.0260768	1	0.0204275	1	0.0849409	1	1	0.0264305
2810403A07Rik	0.0771893	1	-0.0184946	1	0.0481399	1	1	0.0356116
2810474O19Rik	-0.131955	1	-0.0504379	1	-0.246862	1	1	-0.143085
2900026A02Rik	0.0313394	1	-0.0201517	1	0.0146827	1	1	0.0086235
2900060B14Rik	0.0298234	1	0.0359302	1	-0.00219153	1	1	0.0211874
2900097C17Rik	-0.146894	1	-0.167193	1	-0.163837	1	1	-0.159308
3010003L21Rik	-0.00474524	1	0.00980934	1	0.00282784	1	1	0.00263065
3110002H16Rik	-0.0401626	1	-0.00575444	1	0.0210379	1	1	-0.00829304
3110009E18Rik	0.0252933	1	0.0174713	1	0.0381621	1	1	0.0269756
3110040N11Rik	-0.0420003	1	-0.0117381	1	0.0653479	1	1	0.00386984
3110043O21Rik	0.0248646	1	0.0705508	1	-0.00954032	1	1	0.028625
3110062M04Rik	-0.00670146	1	-0.012439	1	0.00241652	1	1	-0.00557464
3110082I17Rik	0.0514775	1	-0.0114654	1	0.00989915	1	1	0.0166371
3300005D01Rik	0.0949881	1	0.0126204	1	-0.0558357	1	1	0.0172576
3830403N18Rik	-0.273962	0.00429699	-0.234906	1	-0.149728	1	0.0915269	-0.219532
3830406C13Rik	-0.0366528	1	0.0541826	1	0.0166753	1	1	0.0114017
4632415L05Rik	-0.0369262	1	-0.05121	1	-0.0420336	1	1	-0.0433899
4833420G17Rik	0.0597743	1	0.0946735	1	0.0529322	1	1	0.0691266
4833439L19Rik	0.0752376	1	0.108602	1	0.101545	1	1	0.0951284
4921524J17Rik	0.040641	1	-0.0400636	1	-0.000357514	1	1	7.3325e-05
4930402H24Rik	-0.00148842	1	-0.0277062	1	-0.0346991	1	1	-0.0212979
4930430F08Rik	0.0221148	1	0.0218176	1	0.0246547	1	1	0.0228624
4930453N24Rik	0.0534073	1	-0.00383616	1	-0.0193107	1	1	0.0100868
4930503L19Rik	0.00832772	1	0.0940817	1	-0.0259799	1	1	0.0254765
4930523C07Rik	0.26372	0.0585221	0.529995	1	0.262536	1	0.460362	0.352083
4930579G24Rik	-0.0321697	1	-0.0270446	1	-0.00830448	1	1	-0.0225063
4931406C07Rik	-0.0464616	1	-0.0444341	1	-0.00840499	1	1	-0.0331002
4931406P16Rik	-0.00996445	1	-0.0908927	1	-0.00391993	1	1	-0.0349257
4931428F04Rik	-0.0712566	1	-0.00143906	1	-0.0554816	1	1	-0.0427258
4932422M17Rik	-0.0210014	1	0.119811	1	0.0589719	1	1	0.0525939
4932438A13Rik	-0.0194645	1	-0.0777173	1	-0.0515951	1	1	-0.0495923
4933404O12Rik	0.0151093	1	-0.0473473	1	0.011953	1	1	-0.00676169
4933427D14Rik	-0.00381365	1	-0.073511	1	-0.0257492	1	1	-0.034358
4933434E20Rik	-0.0762492	1	-0.0950483	1	-0.077588	1	1	-0.0829618
5031425E22Rik	0.00627361	1	-0.027711	1	0.0479946	1	1	0.00885241
5031439G07Rik	-0.000189019	1	-0.0161909	1	0.00965011	1	1	-0.00224327
5033406O09Rik	-0.0132603	1	0.0289581	1	-0.0403946	1	1	-0.00823226
5033430I15Rik	0.0304534	1	0.201767	1	0.0610179	1	1	0.097746
5430416N02Rik	0.222615	1	0.331481	1	0.0249353	1	1	0.193011
5430421F17Rik	0.0234259	1	-0.0235506	1	-0.0522588	1	1	-0.0174612
5730455P16Rik	0.0310137	1	0.0443837	1	0.00577114	1	1	0.0270562
5730480H06Rik	-0.0131347	1	0.0788913	1	0.00452089	1	1	0.0234258
5730559C18Rik	-0.0532066	1	-0.0898099	1	0.000645692	1	1	-0.047457
5930430L01Rik	-0.0358196	1	-0.0204131	1	-0.0122148	1	1	-0.0228159
6030458C11Rik	-0.0133829	1	0.0221939	1	0.0244225	1	1	0.0110778
8030462N17Rik	0.0407948	1	0.0757209	1	-0.00235064	1	1	0.038055
9030025P20Rik	0.0186803	1	-0.0166202	1	-0.0617835	1	1	-0.0199078
9030624J02Rik	-0.0124867	1	-0.0164611	1	-0.0533577	1	1	-0.0274352
9130401M01Rik	0.0754914	1	-0.0795726	1	-0.0371547	1	1	-0.0137453
9230110C19Rik	0.000253312	1	-0.0523351	1	0.0117593	1	1	-0.0134408
9430015G10Rik	0.0250428	1	0.00664556	1	-0.00323335	1	1	0.009485
9430038I01Rik	-0.0462108	1	0.0133051	1	-0.047855	1	1	-0.0269202
9530068E07Rik	0.0323454	1	0.0333733	1	0.0479782	1	1	0.037899
9930021J03Rik	-0.152622	0.347016	-0.144895	1	-0.0566996	1	0.908652	-0.118072
A130010J15Rik	0.0128892	1	0.00780543	1	0.0154808	1	1	0.0120585
A230050P20Rik	0.0183471	1	0.0210902	1	0.00131211	1	1	0.0135831
A330069E16Rik	0.00601324	1	0.0319915	1	-0.00775409	1	1	0.0100836
A430005L14Rik	0.140855	1	0.133603	1	-0.0199608	1	1	0.0848324
A630089N07Rik	-0.00698715	1	-0.0161802	1	-0.0278756	1	1	-0.0170143
AA467197	-0.0123123	1	-0.187154	1	-0.146014	1	1	-0.11516
Aaas	-0.00176506	1	-0.00874184	1	0.0152523	1	1	0.0015818
Aacs	0.00195297	1	-0.011376	1	0.0225475	1	1	0.00437482
Aaed1	0.0460275	1	-0.0252925	1	-0.0210544	1	1	-0.000106478
Aak1	0.0387978	1	-0.0512653	1	0.0625413	1	1	0.0166913
Aamdc	-0.00228504	1	-0.00719042	1	-0.0722303	1	1	-0.0272352
Aamp	0.0147222	1	0.069312	1	-0.0134556	1	1	0.0235262
Aar2	-0.0147207	1	0.0431247	1	0.0227672	1	1	0.0170571
Aars	0.0552255	1	0.0222766	1	0.0516946	1	1	0.0430655
Aasdhppt	-0.0589371	1	-0.101135	1	-0.149644	1	1	-0.103239
Aatf	-0.0598357	1	-0.0585997	1	-0.0444681	1	1	-0.0543012
Abca1	-0.0277396	1	-0.00808406	1	-0.0747639	1	1	-0.0368625
Abca3	-0.0302453	1	-0.0552437	1	-0.0608592	1	1	-0.0487827
Abca5	-0.014888	1	0.0469198	1	0.015262	1	1	0.0157646
Abcb10	-0.0163625	1	-0.0078869	1	-0.0231894	1	1	-0.0158129
Abcb7	-0.0610009	1	-0.108726	1	-0.064401	1	1	-0.0780426
Abcb8	0.00456857	1	0.0610715	1	0.0202688	1	1	0.0286363
Abcb9	-0.0551355	1	-0.0418237	1	0.0361161	1	1	-0.020281
Abcc1	-0.0196485	1	-0.21566	1	0.0315784	1	1	-0.0679099
Abcd3	0.0099067	1	-0.0414067	1	-0.0283204	1	1	-0.0199401
Abcd4	-0.0177227	1	-0.0349521	1	-0.00819389	1	1	-0.0202895
Abce1	-0.0126733	1	0.130917	1	0.0255863	1	1	0.0479433
Abcf1	0.0108923	1	-0.126095	1	-0.0369656	1	1	-0.0507229
Abcf2	0.0703886	1	-0.0596388	1	0.0293997	1	1	0.0133832
Abcf3	0.00465741	1	-0.0674034	1	-0.0866007	1	1	-0.0497822
Abcg2	0.164155	0.0164287	0.127019	1	0.169379	1	0.222601	0.153518
Abhd10	-0.0131695	1	0.00107273	1	-0.040345	1	1	-0.0174806
Abhd11	-0.0135496	1	0.152115	1	0.0136099	1	1	0.0507251
Abhd12	-0.03208	1	-0.0570019	1	0.0435062	1	1	-0.0151919
Abhd13	0.0107439	1	-0.0312331	1	-0.0484212	1	1	-0.0229701
Abhd14a	0.0491844	1	0.0775627	1	-0.0247631	1	1	0.0339947
Abhd16a	0.0376856	1	-0.0167568	1	-0.0105291	1	1	0.00346656
Abhd17a	-0.0240222	1	0.0642358	1	0.0253285	1	1	0.0218474
Abhd17b	-0.0795925	1	0.0506377	1	-0.0464174	1	1	-0.0251241
Abhd17c	0.0212175	1	-0.0658802	1	-0.0452618	1	1	-0.0299748
Abhd18	-0.0444778	1	-0.0225776	1	-0.0110669	1	1	-0.0260408
Abhd2	0.133806	1	0.217702	1	0.0437583	1	1	0.131756
Abhd4	-0.0181594	1	0.0674914	1	-0.0289143	1	1	0.00680589
Abhd5	-0.00156321	1	0.126421	1	-0.047545	1	1	0.025771
Abhd6	-0.0179185	1	0.0525815	1	0.0233186	1	1	0.0193272
Abhd8	-0.128399	1	-0.0930116	1	-0.0822543	1	1	-0.101222
Abi1	-0.086249	1	-0.0672427	1	0.0243398	1	1	-0.0430506
Abi2	-0.0189228	1	0.0112255	1	0.0287152	1	1	0.007006
Abl1	-0.0710557	1	0.0488137	1	0.0118788	1	1	-0.00345441
Abl2	0.033314	1	0.189307	1	0.127791	1	1	0.116804
Abr	-0.0272959	1	0.0160611	1	0.0238953	1	1	0.00422016
Abracl	-0.0884204	1	-0.281928	1	-0.0317487	1	1	-0.134032
Abraxas1	0.00659445	1	-0.0477814	1	0.0686145	1	1	0.00914252
Abraxas2	0.0180973	1	0.108168	1	0.0298551	1	1	0.05204
Abt1	0.0593675	1	0.0837036	1	0.00572702	1	1	0.0495994
AC127341.3	0.0403768	1	-0.0301115	1	0.0625336	1	1	0.0242663
AC149090.1	-0.0329664	1	-0.0539711	1	0.069367	1	1	-0.00585682
AC160336.1	0.388994	1	0.407612	1	0.681962	1	1	0.492856
AC191865.2	-0.0159122	1	-0.0706412	1	0.0238859	1	1	-0.0208892
Acaa1a	-0.0137087	1	-0.0486218	1	-0.0519149	1	1	-0.0380818
Acaa2	-0.0492811	1	-0.0664435	1	-0.0233589	1	1	-0.0463612
Acaca	-0.0428527	1	-0.0163095	1	0.0497907	1	1	-0.00312382
Acad8	0.0249861	1	-0.0183372	1	-0.0224729	1	1	-0.00527467
Acad9	0.0474551	1	-0.0521173	1	0.0138485	1	1	0.00306208
Acadl	0.0674583	1	-0.0742629	1	-0.154005	1	1	-0.0536031
Acadm	0.0432768	1	0.0934336	1	-0.093667	1	1	0.0143478
Acads	-0.0486281	1	-0.151798	1	0.00156446	1	1	-0.0662871
Acadsb	-0.0368181	1	-0.101762	1	-0.0795143	1	1	-0.0726983
Acadvl	0.0274708	1	0.0865332	1	0.0587098	1	1	0.0575712
Acap1	-0.0130211	1	-0.0828442	1	0.0250353	1	1	-0.02361
Acap2	0.00775806	1	-0.0377458	1	-0.0328371	1	1	-0.0209416
Acap3	-0.011163	1	0.0359908	1	0.029625	1	1	0.0181509
Acat1	-0.072153	1	-0.109207	1	0.0246148	1	1	-0.0522484
Acat2	-0.0540524	1	0.0127423	1	-0.0788533	1	1	-0.0400545
Acbd3	0.065621	1	0.26201	1	0.05584	1	1	0.127824
Acbd4	-0.0792413	1	0.0120871	1	0.0111025	1	1	-0.0186839
Acbd5	-0.0383446	1	0.0799727	1	0.0156208	1	1	0.019083
Acbd6	-0.0770991	1	-0.0212683	1	0.0759975	1	1	-0.00745661
Acd	-0.00404718	1	0.00651363	1	0.122023	1	1	0.0414966
Acer3	0.0697404	1	1.54464e-05	1	0.0509344	1	1	0.0402301
Acin1	0.0476456	1	0.0859968	1	0.114711	1	1	0.0827844
Acly	-0.0420795	1	-0.088044	1	0.0132273	1	1	-0.0389654
Aco1	0.0141027	1	-0.0909262	1	0.0338222	1	1	-0.0143338
Aco2	-0.000322166	1	0.0127948	1	0.00915204	1	1	0.00720823
Acot13	0.0439369	1	0.0017031	1	-0.0557344	1	1	-0.0033648
Acot2	0.0230569	1	0.114743	1	-0.0488859	1	1	0.029638
Acot7	0.0458499	1	0.123187	1	-0.0576371	1	1	0.0371332
Acot8	-0.0401208	1	-0.0907847	1	0.0279362	1	1	-0.0343231
Acot9	-0.333661	1.42025e-06	-0.385631	1	-0.184745	1	0.000149287	-0.301346
Acox1	-0.0217777	1	-0.0945306	1	0.074228	1	1	-0.0140268
Acp1	0.0319134	1	0.0264736	1	0.0957455	1	1	0.0513775
Acp2	-0.0119904	1	-0.0484085	1	-0.0328821	1	1	-0.0310937
Acp6	-0.0829599	1	-0.0794139	1	-0.0362074	1	1	-0.0661937
Acsbg1	-0.0267386	1	-0.0122332	1	-0.0272099	1	1	-0.0220605
Acsl1	0.0195912	1	-0.00754825	1	0.0282874	1	1	0.0134435
Acsl3	-0.105243	1	-0.0916864	1	-0.0637062	1	1	-0.0868784
Acsl4	-0.175544	1	-0.253445	1	-0.118068	1	1	-0.182352
Acsl5	-0.161824	1	-0.0991075	1	-0.075163	1	1	-0.112031
Acss2	-0.00649191	1	0.0185861	1	0.00307245	1	1	0.00505553
Actb	0.0132494	1	-0.140044	1	-0.00841313	1	1	-0.0450692
Actg1	0.262317	1	0.289119	1	0.183338	1	1	0.244924
Actl6a	0.0383652	1	0.036902	1	0.0623916	1	1	0.0458863
Actn1	0.0440904	1	-0.0362871	1	-0.0404156	1	1	-0.0108708
Actn4	0.124825	1	0.0422567	1	0.0752694	1	1	0.0807837
Actr10	0.0243126	1	-0.133956	1	-0.00261608	1	1	-0.0374197
Actr1a	-0.122699	1	-0.0646787	1	-0.142747	1	1	-0.110042
Actr1b	0.014374	1	0.16407	1	0.00898618	1	1	0.0624766
Actr2	0.0346521	1	0.113468	1	-0.0892111	1	1	0.0196365
Actr3	0.00258131	1	0.136788	1	-0.0832995	1	1	0.0186898
Actr6	0.00409566	1	-0.0839942	1	-0.0580003	1	1	-0.0459663
Actr8	-0.00792562	1	-0.0548944	1	-0.0646229	1	1	-0.042481
Acvr1	-0.0215143	1	0.0792406	1	-0.0148845	1	1	0.0142806
Acy1	-0.00339733	1	-0.00937224	1	0.0171508	1	1	0.00146042
Acyp1	0.000526927	1	0.0515607	1	0.0219623	1	1	0.0246833
Acyp2	0.0348093	1	0.0422473	1	-0.0242054	1	1	0.0176171
Ada	-0.0225258	1	-0.028125	1	-0.0221019	1	1	-0.0242509
Adam10	-0.0206119	1	0.0835015	1	0.0155783	1	1	0.0261559
Adam15	0.0610153	1	0.0461229	1	0.0187885	1	1	0.0419756
Adam17	-0.015715	1	0.110309	1	-0.0325395	1	1	0.0206848
Adam9	0.0264867	1	0.0744761	1	-0.0334167	1	1	0.0225154
Adamts1	0.0942668	1	0.00470218	1	0.199632	1	1	0.0995335
Adamts4	-0.070694	1	-0.0227029	1	-0.0320481	1	1	-0.041815
Adamtsl3	-0.0561149	1	-0.0609213	1	0.0237835	1	1	-0.0310842
Adamtsl5	0.00271936	1	0.137947	1	0.000210543	1	1	0.0469589
Adar	-0.0139139	1	0.0057263	1	-0.0177638	1	1	-0.00865046
Adarb1	-0.035248	1	-0.0176799	1	0.000333592	1	1	-0.0175314
Adat2	-0.015214	1	-0.0301419	1	-0.0358933	1	1	-0.0270831
Adck1	-0.0123611	1	0.0137656	1	-0.00159586	1	1	-6.37792e-05
Adck5	-0.00715563	1	0.0662312	1	0.0175932	1	1	0.0255563
Adcy3	0.049955	1	-0.0529932	1	-0.00977911	1	1	-0.00427245
Adcy6	0.00971643	1	0.0268423	1	-0.0198898	1	1	0.0055563
Adcy7	0.044899	1	0.0240772	1	0.0126031	1	1	0.0271931
Add1	-0.0850931	1	-0.111695	1	-0.0568109	1	1	-0.0845329
Add3	-0.0648956	1	-0.0200242	1	-0.0656247	1	1	-0.0501815
Adgra3	0.0159223	1	0.0824809	1	0.04598	1	1	0.0481277
Adgre5	-0.0275076	1	0.0209353	1	0.0623464	1	1	0.0185914
Adgrl1	0.00725868	1	0.10778	1	0.0503416	1	1	0.0551269
Adgrl3	0.0807304	1	0.0253607	1	0.0426333	1	1	0.0495748
Adh5	0.0322592	1	0.0655675	1	0.104509	1	1	0.0674453
Adh7	-0.0204898	1	-0.095131	1	-0.0759413	1	1	-0.063854
Adi1	0.00715884	1	-0.0711951	1	0.00210471	1	1	-0.0206439
Adipor1	0.139999	1	0.200343	1	0.0768532	1	1	0.139065
Adipor2	-0.0655704	1	0.0181716	1	-0.0270153	1	1	-0.0248047
Adk	0.129555	1	0.127655	1	-0.00758565	1	1	0.0832082
Adm	-0.132562	1	0.19649	1	-0.0764595	1	1	-0.00417717
Adnp	0.0212193	1	-0.0636453	1	0.00100585	1	1	-0.0138067
Ado	0.0276218	1	0.0735166	1	0.022245	1	1	0.0411278
Adpgk	0.0140628	1	-0.0186031	1	0.0777006	1	1	0.0243867
Adprh	0.0205014	1	-0.00792696	1	-0.0418653	1	1	-0.00976361
Adprhl2	0.0299836	1	0.0796522	1	-0.0658982	1	1	0.0145792
Adprm	0.00304775	1	-0.0193136	1	-0.00801152	1	1	-0.00809247
Adrb2	0.00386691	1	-0.00979394	1	-0.030612	1	1	-0.0121797
Adrm1	-0.0895573	1	-0.15222	1	-0.0189433	1	1	-0.0869067
Adsl	0.0100998	1	-0.0218449	1	0.0566396	1	1	0.0149648
Adss	0.0465836	1	0.00175001	1	-0.046794	1	1	0.000513192
Adssl1	0.0318878	1	-0.0288149	1	0.203952	1	1	0.0690084
Aebp1	0.141708	1	-0.220824	1	0.0124356	1	1	-0.0222268
Aebp2	0.0230251	1	0.115648	1	-0.0301127	1	1	0.0361868
Aen	0.0335113	1	-0.0200151	1	-0.0261825	1	1	-0.00422876
Aes	-0.207159	1	-0.0486542	1	0.0039085	1	1	-0.0839683
Afap1	0.184691	1	0.272291	1	0.0483602	1	1	0.168447
Afdn	-0.0358165	1	-0.0502586	1	-0.109601	1	1	-0.0652254
Aff1	0.0156078	1	0.0194816	1	0.100379	1	1	0.045156
Aff4	-0.0221342	1	0.00832479	1	-0.0437242	1	1	-0.0191779
Afg3l1	0.000653916	1	-0.163305	1	-0.0365223	1	1	-0.0663911
Afg3l2	0.0253198	1	0.0853429	1	0.0413394	1	1	0.0506674
Afp	0.0276275	1	-0.232488	1	-0.0532387	1	1	-0.086033
Aftph	0.016871	1	-0.0952724	1	-0.0123596	1	1	-0.0302537
Aga	-0.00139153	1	-0.12753	1	0.0319203	1	1	-0.0323336
Agap1	-0.0263816	1	0.165885	1	0.0711918	1	1	0.0702316
Agap3	-0.0588199	1	0.0178268	1	-0.070588	1	1	-0.0371937
Agbl3	0.0158289	1	0.0512507	1	0.0226523	1	1	0.0299106
Agfg1	0.19596	1	0.0679391	1	0.111604	1	1	0.125168
Agfg2	-0.0287783	1	0.00257333	1	-0.0242353	1	1	-0.0168134
Aggf1	0.0446844	1	0.197405	1	0.0239703	1	1	0.0886865
Agk	-0.0392416	1	-0.0318373	1	-0.0331837	1	1	-0.0347542
Agl	-0.0102262	1	0.127389	1	-0.0993886	1	1	0.00592481
Ago1	-0.0195547	1	0.0512415	1	-0.032975	1	1	-0.000429424
Ago2	0.0561599	1	0.167071	1	-0.097927	1	1	0.0417681
Ago3	0.0491083	1	0.108239	1	0.0127193	1	1	0.056689
Agpat1	-0.0251435	1	-0.108809	1	-0.0598466	1	1	-0.0645996
Agpat2	-0.0239722	1	-0.111882	1	-0.115063	1	1	-0.0836391
Agpat3	-0.0941616	1	-0.0154408	1	0.00196212	1	1	-0.0358801
Agpat4	-0.0801452	1	-0.110865	1	-0.0143294	1	1	-0.0684465
Agpat5	0.0348439	1	-0.0640917	1	0.0591509	1	1	0.00996772
Agps	-0.0149379	1	-0.0330742	1	-0.10789	1	1	-0.0519674
Agrn	0.200184	0.00089876	0.314088	0.326517	0.21229	1	0.0123878	0.242187
Agtpbp1	0.0280329	1	-0.0350104	1	0.0108071	1	1	0.00127657
Agtrap	-0.0245188	1	0.0930266	1	0.0120728	1	1	0.0268602
Ahctf1	0.137765	1	-0.0235968	1	0.010008	1	1	0.041392
Ahcyl1	0.0263946	1	-0.0347598	1	-0.0911081	1	1	-0.0331577
Ahcyl2	-0.0441948	1	-0.0332256	1	0.0455721	1	1	-0.0106161
Ahdc1	0.0400399	1	0.0437208	1	0.0120834	1	1	0.031948
Ahi1	0.0813011	1	0.0090921	1	0.034954	1	1	0.0417824
Ahnak	-0.369909	0.0766759	-0.356912	1	-0.356414	1	0.52645	-0.361078
Ahnak2	-0.162973	1	-0.00489397	1	-0.183953	1	1	-0.117273
Ahr	0.00418221	1	-0.0550284	1	0.0601568	1	1	0.00310354
Ahsa1	0.00728514	1	-0.13988	1	0.0615936	1	1	-0.023667
Ahsa2	-0.0391379	1	-0.1812	1	-0.061401	1	1	-0.0939131
AI314180	0.0569829	1	-0.120825	1	0.0220654	1	1	-0.0139255
AI413582	-0.10641	1	0.0368802	1	-0.101585	1	1	-0.0570382
AI467606	-0.014315	1	-0.0310292	1	0.00851179	1	1	-0.0122775
AI597479	-0.0407141	1	-0.0320885	1	0.0554182	1	1	-0.0057948
AI837181	-0.109942	1	-0.162007	1	-0.0650482	1	1	-0.112332
Aida	-0.0842364	1	-0.0194914	1	0.0047251	1	1	-0.0330009
Aifm1	-0.437779	1.01613e-14	-0.406034	1	-0.341849	0.0371005	2.51507e-13	-0.395221
Aifm2	-0.000329074	1	-0.0474612	1	-0.0200888	1	1	-0.0226264
Aig1	0.113924	1	0.0154626	1	-0.0922916	1	1	0.012365
Aim2	0.0878171	1	0.0772284	1	-0.0807451	1	1	0.0281001
Aimp1	0.188771	0.0100857	0.198082	1	0.153585	1	0.162997	0.180146
Aimp2	0.12235	1	0.0555485	1	0.0370066	1	1	0.0716352
Aip	-0.0967322	1	-0.0593183	1	0.00664838	1	1	-0.0498007
Ajuba	-0.0386194	1	-0.0649397	1	-0.0108441	1	1	-0.0381344
Ak2	-0.0334799	1	0.0619367	1	-0.00841629	1	1	0.00668016
Ak4	0.194213	0.107343	0.3246	1	0.0739729	1	0.614219	0.197595
Ak6	0.0860631	1	0.0101714	1	-0.0325857	1	1	0.0212163
Akap1	-0.03784	1	-0.0168158	1	-0.0657635	1	1	-0.0401398
Akap10	0.0129351	1	-0.0736666	1	-0.0148497	1	1	-0.0251938
Akap11	-0.0580695	1	0.00170252	1	0.00352797	1	1	-0.017613
Akap12	0.0367915	1	0.0518459	1	0.0303558	1	1	0.0396644
Akap13	0.0371299	1	0.146853	1	-0.00319887	1	1	0.0602614
Akap7	0.000125255	1	-0.0395826	1	-0.00335195	1	1	-0.0142698
Akap8	-0.0286887	1	0.0559469	1	-0.0790228	1	1	-0.0172549
Akap8l	-0.125707	1	0.110278	1	-0.0827607	1	1	-0.0327298
Akap9	-0.179379	1	-0.23523	1	-0.0882512	1	1	-0.16762
Akip1	0.0120875	1	-0.104602	1	0.0261062	1	1	-0.0221361
Akirin1	-0.00665269	1	0.112917	1	-0.00450499	1	1	0.0339198
Akirin2	0.132051	1	0.118138	1	-0.0708554	1	1	0.0597778
Akr1a1	0.142311	1	0.271141	1	0.117687	1	1	0.177047
Akr1b10	-0.0372891	1	0.0117074	1	0.0437007	1	1	0.00603966
Akr1b3	0.00594038	1	-0.00186944	1	-0.0728596	1	1	-0.0229295
Akr1b8	0.0183625	1	-0.0640579	1	0.00144134	1	1	-0.0147513
Akr1c18	-0.426431	1	-0.544202	1	-0.407235	1	1	-0.459289
Akr1e1	0.0920428	1	0.0662535	1	-0.0698183	1	1	0.0294927
Akr7a5	0.0227784	1	-0.107448	1	-0.0266424	1	1	-0.037104
Akt1	-0.101384	1	-0.0229883	1	-0.00360371	1	1	-0.0426588
Akt1s1	0.10859	1	0.0939206	1	0.0883782	1	1	0.096963
Akt2	-0.00999308	1	0.0498291	1	-0.0292995	1	1	0.00351219
Akt3	0.0146572	1	-0.0115567	1	0.0574729	1	1	0.0201911
Aktip	-0.0788379	1	0.0333139	1	-0.0740463	1	1	-0.0398568
Alad	0.00150578	1	-0.162506	1	0.00212905	1	1	-0.052957
Alas1	0.0126548	1	-0.0112521	1	0.0170759	1	1	0.00615955
Aldh16a1	-0.0382799	1	0.0813063	1	-0.0521657	1	1	-0.00304643
Aldh18a1	-0.0746883	1	-0.0314713	1	-0.0373497	1	1	-0.0478364
Aldh1l2	-0.0296444	1	0.136542	1	-0.0515217	1	1	0.0184587
Aldh2	-0.140231	1	-0.447836	1	-0.219183	1	1	-0.269083
Aldh3a2	-0.0248704	1	-0.0533641	1	-0.0340283	1	1	-0.0374209
Aldh5a1	0.0335214	1	-0.00659892	1	0.0452387	1	1	0.0240537
Aldh7a1	-0.0373247	1	-0.0515709	1	0.0830521	1	1	-0.00194784
Aldh9a1	-0.107445	1	-0.171633	1	-0.142992	1	1	-0.14069
Aldoa	0.103893	1	0.163904	1	0.109453	1	1	0.12575
Alg1	0.0161441	1	0.0480752	1	-0.00181837	1	1	0.0208003
Alg10b	-0.0603911	1	0.101901	1	0.0239421	1	1	0.0218172
Alg11	0.028039	1	-0.0414469	1	-0.0291698	1	1	-0.0141926
Alg13	-0.0747858	1	-0.173018	1	0.00439152	1	1	-0.0811373
Alg14	0.0622054	1	0.0384948	1	0.0297253	1	1	0.0434752
Alg2	0.0055055	1	0.101048	1	-0.0150583	1	1	0.0304985
Alg3	-0.0203035	1	0.0659954	1	0.0212394	1	1	0.0223104
Alg5	-0.0363076	1	-0.0599774	1	-0.00374066	1	1	-0.0333419
Alg6	0.0256209	1	0.0286806	1	0.00758658	1	1	0.0206294
Alg8	0.0637122	1	-0.0137469	1	-0.0217754	1	1	0.00939662
Alkbh1	0.0502129	1	-0.0510892	1	0.0725609	1	1	0.0238948
Alkbh2	0.0250769	1	-0.013589	1	-0.0121447	1	1	-0.000218916
Alkbh3	-0.0518539	1	-0.178308	1	-0.109188	1	1	-0.113117
Alkbh5	0.0438375	1	0.00815987	1	0.0200523	1	1	0.0240166
Alkbh6	0.00206007	1	0.0414443	1	0.0680028	1	1	0.037169
Alkbh7	-0.0170817	1	0.0796253	1	0.0176103	1	1	0.0267179
Alkbh8	0.0138708	1	0.062074	1	0.00165982	1	1	0.0258682
Alms1	-0.0454584	1	-0.0556756	1	-0.0224868	1	1	-0.0412069
Alyref	0.157218	1	-0.00480004	1	-0.0324383	1	1	0.0399931
Amd1	-0.0785844	1	-0.0420913	1	-0.015627	1	1	-0.0454342
Amd2	0.0228829	1	0.146613	1	-0.019168	1	1	0.0501094
Amer1	-0.0951593	1	-0.0157735	1	-0.0442237	1	1	-0.0517188
Amfr	-0.0430739	1	-0.082622	1	-0.0807832	1	1	-0.0688264
Ammecr1	-0.100497	1	-0.140583	1	-0.0831169	1	1	-0.108066
Ammecr1l	-0.0402218	1	-0.0513479	1	-0.0153335	1	1	-0.0356344
Amn1	0.0662428	1	0.00303479	1	-0.00456181	1	1	0.0215719
Amot	-0.0643303	1	-0.119025	1	-0.0387091	1	1	-0.0740214
Amotl1	0.111952	1	-0.00940901	1	-0.0590491	1	1	0.0144978
Amotl2	0.138763	1	0.164689	1	0.142431	1	1	0.148628
Ampd2	0.0402757	1	-0.074006	1	-0.0270768	1	1	-0.0202691
Amz2	-0.0131484	1	0.035965	1	0.0573026	1	1	0.0267064
Anapc1	-0.0690528	1	-0.159164	1	-0.0324137	1	1	-0.0868769
Anapc10	-0.0204958	1	0.035198	1	-0.0854333	1	1	-0.0235771
Anapc11	0.12334	1	0.0601441	1	0.0321324	1	1	0.071872
Anapc13	0.0165043	1	-0.00242857	1	0.0588763	1	1	0.0243173
Anapc15	0.0706134	1	-0.0640089	1	0.0272686	1	1	0.011291
Anapc16	0.0914492	1	0.310139	1	-0.0359579	1	1	0.121877
Anapc2	-0.0639447	1	-0.11384	1	-0.0365816	1	1	-0.0714552
Anapc4	-0.0196683	1	-0.20088	1	-0.0947264	1	1	-0.105092
Anapc5	-0.0211144	1	-0.0861779	1	-0.0438458	1	1	-0.0503794
Anapc7	0.0366223	1	0.121434	1	0.0548089	1	1	0.0709551
Angel2	0.00278656	1	0.0653583	1	0.0395189	1	1	0.0358879
Angpt1	0.0785345	1	0.14333	1	0.0559268	1	1	0.0925971
Angpt2	0.0217143	1	0.043255	1	0.028189	1	1	0.0310528
Angptl2	-0.0498326	1	0.157674	1	-0.00561534	1	1	0.0340753
Angptl4	0.0268291	1	-0.132712	1	-0.0365472	1	1	-0.0474768
Angptl6	0.0190435	1	0.12366	1	0.00147887	1	1	0.0480609
Ank	0.204667	1	-0.00780071	1	0.0857606	1	1	0.0942089
Ankfy1	0.0675065	1	0.0454419	1	0.00926097	1	1	0.0407365
Ankhd1	-0.0658054	1	-0.129154	1	-0.037877	1	1	-0.0776123
Ankib1	-0.0427195	1	-0.0232882	1	0.00898298	1	1	-0.0190082
Ankle2	-0.0137844	1	-0.0576089	1	0.048051	1	1	-0.00778077
Ankmy1	-0.015326	1	-0.0641589	1	0.0152847	1	1	-0.0214001
Ankmy2	-0.02312	1	-0.0439489	1	0.0409474	1	1	-0.00870716
Ankra2	0.0428702	1	-0.00665902	1	-0.0194461	1	1	0.00558835
Ankrd1	-0.200798	1	-0.379331	1	-0.173142	1	1	-0.25109
Ankrd10	0.0505406	1	-0.0971179	1	0.0423759	1	1	-0.00140046
Ankrd11	-0.0348075	1	0.123638	1	-0.0624646	1	1	0.00878863
Ankrd12	-0.0222523	1	-0.109255	1	-0.0368179	1	1	-0.0561083
Ankrd13a	0.0212744	1	0.023006	1	-0.0314572	1	1	0.00427443
Ankrd13b	0.0238147	1	0.0842704	1	-0.00805185	1	1	0.0333444
Ankrd13c	-0.0215372	1	0.0644264	1	0.070892	1	1	0.0379271
Ankrd17	-0.0153394	1	0.0247128	1	-0.0793567	1	1	-0.0233278
Ankrd24	-0.0172124	1	-0.0127486	1	0.0692072	1	1	0.0130821
Ankrd26	-0.0885481	1	-0.102264	1	-0.0497761	1	1	-0.080196
Ankrd27	-0.0247374	1	0.0173634	1	-0.0320833	1	1	-0.0131524
Ankrd28	0.0348861	1	0.0200723	1	-0.0355822	1	1	0.00645874
Ankrd29	-0.00257402	1	0.0240127	1	-0.0471087	1	1	-0.00855669
Ankrd37	0.0206088	1	0.580197	1	-0.00295897	1	1	0.199282
Ankrd39	-0.0549917	1	0.006558	1	0.000688595	1	1	-0.015915
Ankrd40	-0.0166955	1	0.00245519	1	-0.0226804	1	1	-0.0123069
Ankrd44	-0.0438395	1	-0.0801295	1	-0.0859123	1	1	-0.0699604
Ankrd49	0.00680342	1	0.164291	1	0.0230791	1	1	0.0647247
Ankrd50	-0.0402715	1	-0.106798	1	0.0633028	1	1	-0.0279222
Ankrd52	-0.0304845	1	0.0293207	1	-0.0247544	1	1	-0.00863941
Ankrd54	0.0621311	1	-0.0567226	1	0.0124892	1	1	0.0059659
Ankrd9	0.150134	1	0.254845	1	0.0683841	1	1	0.157788
Anks1	-0.016599	1	-0.0481519	1	-0.0155146	1	1	-0.0267552
Anks1b	-0.0190395	1	0.0263861	1	-0.0451622	1	1	-0.0126052
Ankzf1	-0.0433427	1	-0.0302093	1	0.0314917	1	1	-0.0140201
Anln	0.0219356	1	0.0456319	1	-0.189818	1	1	-0.0407502
Ano10	-0.079171	1	-0.135812	1	0.0268662	1	1	-0.0627057
Ano6	0.122771	1	0.0589543	1	-0.0696134	1	1	0.0373705
Ano8	-0.028348	1	-0.0937294	1	0.0273236	1	1	-0.0315846
Anp32a	0.102726	1	0.0420539	1	-0.0336211	1	1	0.037053
Anp32b	0.0867087	1	0.272728	1	-0.048208	1	1	0.103743
Anp32e	0.0236405	1	-0.0831501	1	-0.0154039	1	1	-0.0249711
Antxr1	0.00925052	1	0.0407702	1	0.0247977	1	1	0.0249395
Antxr2	-0.0747792	1	-0.062796	1	-0.0520986	1	1	-0.0632246
Anxa1	-0.220657	1	-0.265766	1	-0.338713	1	1	-0.275045
Anxa11	0.0373014	1	0.197771	1	-0.0581167	1	1	0.0589851
Anxa2	0.214575	0.977928	-0.0988977	1	-0.0128957	1	0.999998	0.0342604
Anxa3	0.0859548	1	0.0507568	1	-0.164956	1	1	-0.00941473
Anxa4	-0.114071	1	-0.136984	1	-0.111831	1	1	-0.120962
Anxa5	0.544895	1.92613e-15	0.411348	1	0.254216	1	1.17286e-12	0.403486
Anxa6	0.14495	0.188702	0.300434	0.176836	0.0371635	1	0.339717	0.160849
Anxa7	0.000938162	1	-0.00422848	1	-0.0507823	1	1	-0.0180242
Anxa8	0.106214	1	0.0741202	1	-0.01356	1	1	0.0555916
Aox1	-0.00846352	1	0.0166657	1	-0.0156967	1	1	-0.00249816
Ap1ar	0.00534518	1	0.0170441	1	0.00817688	1	1	0.0101887
Ap1b1	0.0150971	1	-0.0251442	1	0.0572583	1	1	0.0157371
Ap1g1	-0.055204	1	0.00143645	1	0.0118931	1	1	-0.0139581
Ap1m1	-0.0390639	1	-0.159587	1	-0.0513918	1	1	-0.0833475
Ap1s1	-0.0486082	1	-0.0262556	1	-0.00632455	1	1	-0.0270628
Ap1s2	-0.114943	1	-0.0532221	1	-0.087837	1	1	-0.0853341
Ap2a1	-0.0137911	1	0.00329094	1	0.0116459	1	1	0.000381897
Ap2a2	-0.0333061	1	0.201889	1	-0.052814	1	1	0.0385897
Ap2b1	0.0105224	1	0.032593	1	0.0459626	1	1	0.0296927
Ap2m1	-0.0264631	1	-0.0312978	1	0.00847093	1	1	-0.01643
Ap2s1	-0.0871417	1	0.0971915	1	-0.0560558	1	1	-0.0153353
Ap3b1	0.04953	1	0.174729	1	0.0416463	1	1	0.0886351
Ap3d1	-0.0603146	1	-0.106362	1	0.0573174	1	1	-0.0364529
Ap3m1	-0.0367748	1	0.027433	1	-0.0184862	1	1	-0.00927596
Ap3s1	-0.0339887	1	-0.0963034	1	-0.0214064	1	1	-0.0505661
Ap3s2	-0.0317051	1	-0.0452954	1	-0.0045327	1	1	-0.0271778
Ap4m1	0.0274527	1	-0.0201437	1	0.0777205	1	1	0.0283432
Ap4s1	0.0323243	1	-0.0329092	1	0.0785433	1	1	0.0259862
Apaf1	-0.0389851	1	-0.040794	1	0.00326831	1	1	-0.0255036
Apba3	-0.0439229	1	-0.0608001	1	0.00680192	1	1	-0.0326404
Apbb1	0.0332348	1	-0.0262119	1	-0.00491321	1	1	0.000703241
Apbb1ip	-0.0310197	1	-0.120499	1	-0.0637231	1	1	-0.0717473
Apbb2	0.0447748	1	0.0656094	1	0.0121383	1	1	0.0408408
Apc	0.00313197	1	-0.00864896	1	-0.0114707	1	1	-0.00566255
Apeh	-0.010832	1	-0.0449535	1	-0.0609159	1	1	-0.0389005
Apex1	-0.132763	1	-0.121083	1	0.00465856	1	1	-0.0830625
Apex2	-0.0491196	1	-0.05738	1	-0.0134018	1	1	-0.0399671
Aph1a	0.026608	1	-0.0729872	1	-0.0637863	1	1	-0.0367218
Aph1b	-0.00552425	1	0.0388784	1	0.0421675	1	1	0.0251739
Api5	-0.00124948	1	0.0377843	1	-0.0902107	1	1	-0.017892
Apip	-0.147116	0.899741	-0.194962	1	-0.0359112	1	0.999818	-0.125996
Aplf	-0.0249935	1	-0.013292	1	-0.0367238	1	1	-0.0250031
Aplp2	-0.372144	1.9754e-05	-0.355735	1	-0.236739	1	0.00139266	-0.32154
Apmap	-0.0395825	1	-0.00034534	1	0.0076525	1	1	-0.0107585
Apobec3	-0.00159428	1	0.0304609	1	-0.00335934	1	1	0.00850243
Apobr	-0.059629	1	-0.0225526	1	0.0576335	1	1	-0.00818273
Apoe	-0.0127919	1	-0.146209	1	0.0657136	1	1	-0.0310958
Apol10b	-0.0471956	1	-0.0065591	1	-0.039501	1	1	-0.0310853
Apol7a	-0.0231898	1	0.0442156	1	0.024095	1	1	0.0150402
Apol9a	-0.115858	1	-0.123908	1	-0.152805	1	1	-0.130857
Apol9b	-0.0719119	1	-0.0671536	1	-0.0260667	1	1	-0.0550441
Apoo	-0.248375	1.92313e-06	-0.134723	1	-0.183417	1	0.000193803	-0.188838
Apool	-0.198381	0.0221504	-0.239319	1	-0.169258	1	0.267302	-0.202319
Apopt1	0.0380482	1	0.0103818	1	-0.069846	1	1	-0.00713866
App	-0.0988432	1	-0.00846201	1	0.197447	1	1	0.0300471
Appbp2	-0.050839	1	0.0304562	1	0.0532942	1	1	0.0109705
Appl1	-0.0266602	1	-0.036028	1	-0.0990107	1	1	-0.0538996
Appl2	-0.0166168	1	0.0432868	1	-0.0255421	1	1	0.000375952
Aprt	-0.100271	1	-0.208659	1	-0.0579	1	1	-0.122277
Aptx	0.011445	1	-0.0110841	1	-0.044617	1	1	-0.0147521
Aqp5	0.389725	0.000143101	0.347283	1	0.29275	1	0.00701632	0.343253
Aqr	-0.000612538	1	-0.0680206	1	-0.0132789	1	1	-0.027304
Araf	-0.189204	0.049566	-0.149451	1	-0.0924458	1	0.422194	-0.1437
Arcn1	0.0242484	1	0.0724525	1	-0.0400277	1	1	0.0188911
Areg	0.745022	8.34156e-09	0.534123	1	0.0849929	1	1.60675e-06	0.454713
Arf1	0.085658	1	0.0475864	1	0.0321151	1	1	0.0551199
Arf2	-0.00858935	1	0.0958046	1	0.0205796	1	1	0.0359316
Arf3	0.0141639	1	0.00309806	1	-0.0238024	1	1	-0.00218017
Arf4	0.0789177	1	0.15519	1	-0.0303033	1	1	0.0679349
Arf5	-0.155982	1	-0.254583	1	-0.0119304	1	1	-0.140832
Arf6	0.143141	1	0.369846	1	0.0741581	1	1	0.195715
Arfgap1	-0.0282966	1	-0.0806001	1	0.0576179	1	1	-0.0170929
Arfgap2	-0.0475831	1	-0.00405167	1	-0.040747	1	1	-0.0307939
Arfgap3	-0.0160548	1	-0.0501345	1	0.039237	1	1	-0.00898409
Arfgef1	0.0343203	1	-0.0547642	1	0.0502151	1	1	0.00992372
Arfip1	0.000276436	1	0.192337	1	0.0301523	1	1	0.0742551
Arfip2	0.0107651	1	0.0525772	1	0.0207469	1	1	0.0280297
Arfrp1	-0.028811	1	-0.0841653	1	-0.0773637	1	1	-0.0634467
Arglu1	-0.0394281	1	-0.153554	1	-0.0321783	1	1	-0.0750533
Arhgap1	0.00973422	1	-0.00280791	1	0.0245042	1	1	0.0104769
Arhgap10	0.145128	1	0.278458	1	-0.0668384	1	1	0.118916
Arhgap11a	0.0114211	1	-0.0583119	1	-0.0314708	1	1	-0.0261205
Arhgap12	-0.00611013	1	-0.0834746	1	0.02274	1	1	-0.0222816
Arhgap17	0.048345	1	-0.0320195	1	0.00845752	1	1	0.008261
Arhgap18	-0.0309707	1	0.0418018	1	-0.025502	1	1	-0.00489034
Arhgap19	-0.0404334	1	-0.0569467	1	-0.00138873	1	1	-0.0329229
Arhgap21	-0.0396653	1	-0.0736258	1	-0.0305042	1	1	-0.0479318
Arhgap22	0.00351237	1	-0.0117343	1	-0.0546597	1	1	-0.0209606
Arhgap23	-0.070258	1	-0.0309099	1	0.0491266	1	1	-0.0173471
Arhgap29	0.0543796	1	0.0258718	1	0.146492	1	1	0.0755812
Arhgap31	0.00911762	1	0.0817964	1	0.0499552	1	1	0.0469564
Arhgap35	-0.0199306	1	-0.0692187	1	0.0222375	1	1	-0.0223039
Arhgap42	0.07272	1	0.207024	1	0.112077	1	1	0.130607
Arhgap5	0.0880798	1	0.109128	1	-0.0463837	1	1	0.0502745
Arhgdia	0.0556247	1	0.0145245	1	-0.00995014	1	1	0.0200664
Arhgdib	0.136528	1	0.0662528	1	0.0589261	1	1	0.0872358
Arhgef1	0.00184922	1	-0.0833675	1	0.00972439	1	1	-0.0239313
Arhgef10l	0.0548334	1	0.00958634	1	-0.00590013	1	1	0.0195065
Arhgef11	0.00768437	1	0.0478596	1	-0.0550064	1	1	0.000179184
Arhgef12	0.0879133	1	0.101649	1	-0.0548536	1	1	0.044903
Arhgef17	-0.0129137	1	-0.00647228	1	0.0953558	1	1	0.0253233
Arhgef18	0.0237738	1	0.125308	1	0.0557259	1	1	0.0682693
Arhgef2	0.116965	1	0.192252	1	0.047752	1	1	0.11899
Arhgef25	-0.0112218	1	-0.0338843	1	0.0165392	1	1	-0.00952231
Arhgef28	0.0194482	1	0.0140599	1	0.0154288	1	1	0.0163123
Arhgef40	-0.00629225	1	0.0427682	1	0.0217026	1	1	0.0193928
Arhgef5	0.0363506	1	0.161154	1	0.0201198	1	1	0.0725415
Arhgef7	-0.0499062	1	-0.0201273	1	-0.0088043	1	1	-0.0262793
Arid1a	0.0610385	1	0.168161	1	0.146909	1	1	0.125369
Arid1b	-0.064683	1	-0.115662	1	-0.0415234	1	1	-0.073956
Arid2	0.017066	1	-0.0550595	1	0.0477145	1	1	0.00324036
Arid4a	0.0881017	1	0.0268763	1	0.0664516	1	1	0.0604765
Arid4b	0.0730219	1	0.276829	1	0.0469255	1	1	0.132259
Arid5a	0.0519766	1	0.152126	1	0.0493117	1	1	0.0844714
Arid5b	0.213685	1	0.191897	1	0.175833	1	1	0.193805
Arih1	0.015524	1	0.00351226	1	0.0205844	1	1	0.0132069
Arih2	-0.0210621	1	0.0165944	1	-0.0359852	1	1	-0.0134843
Arl1	-0.0596555	1	-0.0787549	1	-0.15808	1	1	-0.0988301
Arl13b	-0.0934113	1	0.114088	1	-0.0140844	1	1	0.00219736
Arl14ep	-0.009263	1	-0.0324025	1	0.0533835	1	1	0.003906
Arl16	0.0801553	1	0.118485	1	-0.0434127	1	1	0.0517424
Arl2	-0.20553	0.295961	-0.388912	0.634649	-0.247269	1	0.76454	-0.28057
Arl2bp	-0.0156216	1	0.0134738	1	-0.0890444	1	1	-0.0303974
Arl3	-0.185188	1	-0.249631	1	-0.192977	1	1	-0.209265
Arl4a	0.0265615	1	-0.0905577	1	0.114702	1	1	0.0169021
Arl4c	-0.0317179	1	-0.206847	1	-0.00584286	1	1	-0.0814691
Arl5a	0.022615	1	0.0914917	1	-0.00793576	1	1	0.0353903
Arl5b	0.0313774	1	-0.0763206	1	0.0314015	1	1	-0.00451393
Arl6	-0.0432744	1	-0.0411666	1	0.0468997	1	1	-0.0125137
Arl6ip1	-0.188477	1	-0.243782	1	-0.176521	1	1	-0.202927
Arl6ip4	-0.0027045	1	0.141909	1	-0.00495056	1	1	0.0447511
Arl6ip5	0.186013	0.181509	0.374673	1	0.0928474	1	0.75552	0.217844
Arl6ip6	-0.087895	1	-0.126719	1	-0.0679813	1	1	-0.0941985
Arl8a	-0.0230082	1	-0.00487788	1	-0.00547792	1	1	-0.0111213
Arl8b	-0.011748	1	0.136125	1	-0.0197688	1	1	0.0348696
Armc1	0.0281469	1	-0.0276489	1	-0.0566481	1	1	-0.0187167
Armc10	0.0154414	1	0.0638726	1	0.0187812	1	1	0.0326984
Armc6	-0.00378854	1	-0.0513422	1	-0.00799447	1	1	-0.0210417
Armc8	-0.0223576	1	-0.0607883	1	-0.0333019	1	1	-0.0388159
Armcx5	-0.115499	0.0115214	-0.0841911	1	-0.0873897	1	0.17772	-0.0956934
Armt1	0.0383879	1	0.123633	1	0.0194113	1	1	0.0604774
Arnt	-0.025053	1	0.132197	1	0.0184327	1	1	0.0418588
Arntl	-0.0143892	1	0.101904	1	0.0291391	1	1	0.0388845
Arpc1a	-0.0823794	1	-0.0551421	1	0.0349811	1	1	-0.0341801
Arpc1b	0.0877878	1	-0.0292327	1	-0.00888715	1	1	0.016556
Arpc2	0.103182	1	0.0762813	1	-0.0266237	1	1	0.0509464
Arpc3	0.0727859	1	0.16021	1	0.169677	1	1	0.134224
Arpc4	0.00876053	1	0.15995	1	0.0348343	1	1	0.0678482
Arpc5	0.00636918	1	0.072147	1	-0.157229	1	1	-0.0262375
Arpc5l	-0.0427328	1	-0.0451875	1	-0.0381897	1	1	-0.0420367
Arpin	-0.0245147	1	-0.0474956	1	-0.0304727	1	1	-0.034161
Arpp19	-0.032098	1	-0.0640041	1	-0.075617	1	1	-0.0572397
Arrb2	-0.0122673	1	-0.0313995	1	-0.0699884	1	1	-0.037885
Arrdc1	-0.0378391	1	0.0567391	1	0.00884823	1	1	0.0092494
Arsb	0.0501861	1	-0.0698751	1	-0.00232957	1	1	-0.00733952
Artn	-0.00961623	1	0.0375733	1	0.0111121	1	1	0.0130231
Arxes2	-0.0749749	1	0.00418165	1	-0.0190138	1	1	-0.0299357
As3mt	0.0280893	1	-0.0106233	1	0.051312	1	1	0.022926
Asah1	0.101176	1	0.0757816	1	0.0335136	1	1	0.0701571
Asap1	0.266491	0.0545232	0.225718	1	0.0604275	1	0.443854	0.184212
Asap2	0.0336684	1	-0.0345995	1	0.0318368	1	1	0.0103019
Asb13	0.0300415	1	0.0266398	1	0.0126595	1	1	0.0231136
Asb3	-0.0303554	1	-0.120332	1	-0.0734886	1	1	-0.0747255
Asb6	-0.0423892	1	-0.0198829	1	-0.0043293	1	1	-0.0222005
Asb7	-0.0151268	1	-0.000837719	1	0.0215824	1	1	0.00187261
Asb8	-0.0135477	1	-0.0226257	1	0.00153819	1	1	-0.011545
Ascc1	-0.0193968	1	-0.0243745	1	-0.0303069	1	1	-0.0246927
[truncated: 7,942 more rows]

## Sheet: Clone2874_FindMarkers_by_sample
gene	logFC.DV1	adj.p.DV1	logFC.DV2	adj.p.DV2	logFC.DV3	adj.p.DV3	fisher.combined.pvalue	mean.logFC
[truncated: 8,612 more rows]

[truncated: 1 more sheets: Clones751&1197&1240_FindMarkers]
