# Supplementary material for: Clonal transcriptomics identifies mechanisms of chemoresistance and empowers rational design of combination therapies
Source: bioRxiv preprint, doi:10.1101/2021.12.09.471927, version 2 (2022-06-10)
Supplement: Supplementary Table 10 [file 471927_file12.xlsx]

## Sheet: Clone118_AUCell_by_sample
geneset	median_AUCell.DV1	enrichment.DV1	adj.p.DV1	median_AUCell.DV2	enrichment.DV2	adj.p.DV2	median_AUCell.DV3	enrichment.DV3	adj.p.DV3	fisher.combined.pvalue	mean.enrichment
ABBUD_LIF_SIGNALING_1_DN	0.0745184	0.0129465	0.420238	0.0814731	0.0314415	0.829813	0.0815722	-0.0022529	0.757518	0.849869	0.014045
ABBUD_LIF_SIGNALING_1_UP	0.0289071	-0.143628	0.004418	0.0377002	0.00204493	0.904456	0.0344696	0.0388867	0.18807	0.025601	-0.0342322
ABE_INNER_EAR	0.310821	0.0845436	1.4e-23	0.300125	0.0586995	4.94e-08	0.304494	0.0883042	3.88e-13	1.31e-39	0.0771824
ABE_VEGFA_TARGETS_2HR	0.0301205	0.0234488	0.561431	0.0325223	0.0642894	0.252783	0.0349896	0.0450709	0.860043	0.648751	0.0442697
ABE_VEGFA_TARGETS_30MIN	0.0678021	-0.165298	4.84e-06	0.0647712	-0.319047	1.72e-07	0.0717407	-0.0844203	0.0189435	8.46e-12	-0.189588
ABRAHAM_ALPC_VS_MULTIPLE_MYELOMA_UP	0.0813646	0.0620228	0.0351788	0.0805576	0.0458319	0.0718131	0.0856077	0.0951854	0.00027414	8.02e-05	0.06768
ABRAMSON_INTERACT_WITH_AIRE	0.157122	-0.132552	4.1e-07	0.15412	-0.135561	0.00069119	0.154777	-0.190027	3.14e-09	8.07e-16	-0.152713
ACEVEDO_LIVER_CANCER_DN	0.096552	0.00998054	0.0191141	0.0946685	-0.0007365	0.929967	0.0968282	0.0410675	2.03e-06	5.96e-06	0.0167705
ACEVEDO_LIVER_CANCER_UP	0.13034	0.00034933	0.844078	0.129483	0.0203624	9.02e-05	0.127181	-0.0217611	8.68e-05	1.3e-06	-0.0003498
ACEVEDO_LIVER_CANCER_WITH_H3K27ME3_DN	0.0360846	-0.0205593	0.403632	0.0355963	-0.0525275	0.051766	0.0357502	-0.017568	0.35159	0.132123	-0.0302183
ACEVEDO_LIVER_CANCER_WITH_H3K27ME3_UP	0.0565736	0.124591	1.18e-39	0.0595025	0.221402	5.45e-39	0.0571461	0.109926	3.02e-18	4.65e-91	0.151973
ACEVEDO_LIVER_CANCER_WITH_H3K9ME3_DN	0.0341258	-0.0188303	0.267043	0.0350537	-0.0793117	0.0157383	0.0367428	-0.004088	0.678688	0.0685345	-0.0340767
ACEVEDO_LIVER_CANCER_WITH_H3K9ME3_UP	0.0186994	0.00494463	0.897155	0.0186263	-0.0439221	0.178614	0.018896	-0.0416109	0.263324	0.387166	-0.0268628
ACEVEDO_LIVER_TUMOR_VS_NORMAL_ADJACENT_TISSUE_DN	0.0781555	-0.0121727	0.640272	0.0787347	0.00264742	0.895108	0.0791281	0.0218118	0.0121432	0.127403	0.00409549
ACEVEDO_LIVER_TUMOR_VS_NORMAL_ADJACENT_TISSUE_UP	0.174911	0.0113133	0.123794	0.17	0.0220887	0.0105494	0.167026	-0.0184646	0.112896	0.00718557	0.00497913
ACEVEDO_METHYLATED_IN_LIVER_CANCER_DN	0.0400934	0.0211183	0.00260865	0.0399936	0.00436133	0.456535	0.0400909	0.0287006	0.0021266	0.00024545	0.0180601
ACEVEDO_NORMAL_TISSUE_ADJACENT_TO_LIVER_TUMOR_DN	0.0980198	-0.0157746	0.0489849	0.096735	-0.0006404	0.977747	0.0984304	0.00954927	0.29949	0.204431	-0.0022886
ACEVEDO_NORMAL_TISSUE_ADJACENT_TO_LIVER_TUMOR_UP	0.118278	0.0123029	0.137339	0.119578	0.0368868	0.00046402	0.117869	0.0139645	0.163025	0.00081359	0.0210514
ACOSTA_PROLIFERATION_INDEPENDENT_MYC_TARGETS_DN	0.0688075	0.0548994	0.00011142	0.0648913	0.0155621	0.354597	0.0657994	0.0665533	0.00079863	5.28e-06	0.0456716
ACOSTA_PROLIFERATION_INDEPENDENT_MYC_TARGETS_UP	0.0451902	-0.0357213	0.097914	0.0452615	-0.0334449	0.452414	0.0486513	-0.0414573	0.0364961	0.0454015	-0.0368745
ADDYA_ERYTHROID_DIFFERENTIATION_BY_HEMIN	0.142476	-0.0392763	0.0015937	0.147843	-0.034002	0.286753	0.144383	-0.0131367	0.496814	0.0101237	-0.028805
AFFAR_YY1_TARGETS_DN	0.0628546	-0.0489147	0.598975	0.0624024	-0.0103796	0.772254	0.0623493	-0.152874	0.00057368	0.0114469	-0.0707228
AFFAR_YY1_TARGETS_UP	0.0419787	0.107659	9.46e-11	0.042385	0.12073	5.29e-08	0.0432022	0.175977	6.51e-14	8.26e-28	0.134789
AGUIRRE_PANCREATIC_CANCER_COPY_NUMBER_DN	0.0748173	-0.0374993	6.01e-05	0.0771476	0.0249043	0.0352752	0.0764703	-0.0268258	0.011989	4.36e-06	-0.0131402
AGUIRRE_PANCREATIC_CANCER_COPY_NUMBER_UP	0.0865422	-0.0869638	2.72e-38	0.0904065	-0.0677791	1.77e-11	0.0896761	-0.0521918	4.97e-13	2.36e-57	-0.0689782
AIGNER_ZEB1_TARGETS	0.0323214	0.00282867	0.789522	0.0314225	-0.0230653	0.829415	0.0318656	0.0236939	0.0901965	0.46254	0.00115241
AIYAR_COBRA1_TARGETS_DN	0.140037	-0.0564796	0.00267916	0.134997	-0.0340974	0.0352752	0.1319	-0.0247648	0.11744	0.00086003	-0.0384473
AIYAR_COBRA1_TARGETS_UP	0.147353	0.053809	3.22e-08	0.141822	0.0785488	8.09e-06	0.14513	0.0641383	1.34e-05	2.97e-15	0.0654987
AKL_HTLV1_INFECTION_DN	0.0794107	0.0435016	0.00105891	0.0793423	0.0525365	6.03e-05	0.0780091	0.0406059	0.0111692	1.74e-07	0.045548
AKL_HTLV1_INFECTION_UP	0.24838	-0.0459554	2.14e-08	0.250494	-0.0736291	1.83e-07	0.246164	-0.0439893	7.67e-05	2.87e-16	-0.0545246
ALCALA_APOPTOSIS	0.201395	0.00131259	0.268836	0.19735	0.00835984	0.0191719	0.194541	-0.0012651	0.853177	0.0930111	0.00280245
ALCALAY_AML_BY_NPM1_LOCALIZATION_DN	0.0616786	-0.0250439	0.292096	0.0599203	-0.0009358	0.76506	0.0561165	-0.140686	0.00021583	0.00291013	-0.0555551
ALCALAY_AML_BY_NPM1_LOCALIZATION_UP	0.0391366	0.0310785	0.00703968	0.0380969	-0.0476933	0.011091	0.0386402	-0.0168968	0.546338	0.00263137	-0.0111705
ALFANO_MYC_TARGETS	0.101406	0.0052986	0.427163	0.100059	0.0172038	0.107581	0.098278	-0.0024852	0.711658	0.335849	0.00667239
ALONSO_METASTASIS_EMT_UP	0.122337	-0.0005992	0.806433	0.129191	0.0477218	0.00139013	0.125414	0.00984368	0.44506	0.0187131	0.0189888
ALONSO_METASTASIS_UP	0.206553	0.00503603	0.0385516	0.204787	0.0154714	0.00294599	0.199805	0.0129757	0.0677462	0.00063169	0.011161
ALTEMEIER_RESPONSE_TO_LPS_WITH_MECHANICAL_VENTILATION	0.0356241	0.0266485	0.120472	0.0343319	0.0574029	0.100958	0.0361703	0.171449	3.42e-07	8.6e-07	0.0851667
AMBROSINI_FLAVOPIRIDOL_TREATMENT_TP53	0.0223202	-0.0013832	0.978993	0.0236194	0.0687554	0.144742	0.0243831	0.0542205	0.200473	0.309692	0.0405309
AMIT_EGF_RESPONSE_120_HELA	0.0718976	-0.0317659	0.1626	0.0750988	0.0109183	0.506017	0.0721534	0.0167522	0.747194	0.472061	-0.0013652
AMIT_EGF_RESPONSE_120_MCF10A	0.096201	-0.0264313	0.165933	0.0953585	0.0283199	0.3629	0.0916887	-0.0426701	0.0877843	0.105646	-0.0135938
AMIT_EGF_RESPONSE_240_HELA	0.0903952	-0.0363139	0.0617473	0.0958994	0.0327088	0.233439	0.0885235	-0.0281151	0.325786	0.0973542	-0.0105734
AMIT_EGF_RESPONSE_40_HELA	0.171413	0.0103742	0.684446	0.182058	0.010192	0.662943	0.180821	0.118878	0.00012422	0.00330537	0.0464815
AMIT_EGF_RESPONSE_480_HELA	0.100879	-0.0209106	0.14618	0.102784	0.0193546	0.536091	0.101925	0.0154388	0.123644	0.158774	0.00462763
AMIT_EGF_RESPONSE_480_MCF10A	0.0388785	-0.0546185	0.207938	0.0386713	-0.126612	0.00855979	0.0420113	0.00370478	0.595316	0.0331765	-0.0591754
AMIT_EGF_RESPONSE_60_HELA	0.122094	0.00891017	0.857304	0.121691	-0.0396013	0.538175	0.12504	0.00729032	0.800819	0.920496	-0.0078003
AMIT_EGF_RESPONSE_60_MCF10A	0.19074	-0.0145178	0.44011	0.19273	-0.0233712	0.328197	0.197523	0.0553323	0.0445161	0.120767	0.00581443
AMIT_SERUM_RESPONSE_120_MCF10A	0.0551466	0.00257616	0.904484	0.0562983	0.0833347	0.173583	0.0529532	0.0641589	0.163	0.291318	0.0500232
AMIT_SERUM_RESPONSE_240_MCF10A	0.0590711	-0.0305626	0.0730759	0.061965	0.00666998	0.383988	0.0592426	-0.0443784	0.0284546	0.026805	-0.022757
AMIT_SERUM_RESPONSE_40_MCF10A	0.174476	-0.007145	0.807193	0.190487	0.0456432	0.341962	0.180237	0.0927386	0.0027557	0.0258372	0.0437456
AMIT_SERUM_RESPONSE_480_MCF10A	0.0636708	-0.0239057	0.436552	0.0652482	0.0223424	0.861954	0.0643189	-0.0612177	0.0220224	0.143195	-0.020927
AMIT_SERUM_RESPONSE_60_MCF10A	0.109361	-0.0378749	0.0766638	0.112987	-0.0623124	0.0134746	0.112162	0.0578045	0.040352	0.00258204	-0.0141276
AMUNDSON_RESPONSE_TO_ARSENITE	0.104145	-0.0106137	0.0176914	0.105401	-0.0070701	0.680679	0.105379	-0.0235879	0.0535899	0.022797	-0.0137572
ANASTASSIOU_MULTICANCER_INVASIVENESS_SIGNATURE	0.067798	0.0773599	0.00109059	0.071733	0.112622	3.9e-05	0.0732527	0.178222	4.16e-10	1.39e-14	0.122735
ANDERSEN_CHOLANGIOCARCINOMA_CLASS1	0.0391108	-0.0208199	0.508418	0.0383236	0.00329633	0.759878	0.0411443	-0.0365898	0.0223954	0.147354	-0.0180378
ANDERSEN_CHOLANGIOCARCINOMA_CLASS2	0.0364684	0.00491084	0.681093	0.0364816	0.00062575	0.843875	0.0350208	-0.0722399	0.00676875	0.0853797	-0.0222344
ANDERSEN_LIVER_CANCER_KRT19_DN	0.0291537	-0.12755	1.01e-07	0.0260714	-0.315356	2e-17	0.0265557	-0.146172	1.71e-05	7.63e-26	-0.196359
ANDERSEN_LIVER_CANCER_KRT19_UP	0.386211	-0.0030235	0.771519	0.384767	0.0113422	0.0241563	0.379399	-0.0143704	0.00873172	0.00777415	-0.0020172
APPEL_IMATINIB_RESPONSE	0.0496463	0.0292347	0.849622	0.0523364	0.0351347	0.209219	0.0539733	0.119563	0.00334642	0.0214199	0.0613107
APPIERTO_RESPONSE_TO_FENRETINIDE_DN	0.218726	0.0381888	1.41e-06	0.217658	0.056668	2.99e-09	0.210733	0.0211137	0.00862584	2.75e-14	0.0386568
APPIERTO_RESPONSE_TO_FENRETINIDE_UP	0.149416	0.03533	0.00477001	0.150696	0.101258	1.52e-10	0.147436	-0.007037	0.831583	2.57e-10	0.0431837
APRELIKOVA_BRCA1_TARGETS	0.291163	0.047265	1.65e-10	0.284292	0.0486707	8.8e-07	0.286595	0.012902	0.348258	3.76e-14	0.0362792
ASGHARZADEH_NEUROBLASTOMA_POOR_SURVIVAL_DN	0.0495662	-0.0866396	0.00740939	0.0501843	-0.151674	0.0007001	0.049486	-0.0933598	0.102147	6.35e-05	-0.110558
ASTIER_INTEGRIN_SIGNALING	0.0930689	-0.0172859	0.183074	0.0919471	-0.0160549	0.982451	0.0948482	0.0305355	0.0647059	0.178879	-0.0009351
ASTON_MAJOR_DEPRESSIVE_DISORDER_DN	0.0412014	0.0169919	0.0663473	0.0412719	0.0323828	0.164351	0.0426541	0.0227288	0.336558	0.0819495	0.0240345
ASTON_MAJOR_DEPRESSIVE_DISORDER_UP	0.0718316	-0.0382765	0.0053776	0.0744393	-0.0072264	0.922078	0.0763261	-0.0368708	0.0519614	0.0111847	-0.0274579
AUNG_GASTRIC_CANCER	0.157834	-0.003582	0.951299	0.156967	0.0387601	0.0105549	0.15777	-0.012628	0.225633	0.0580744	0.00751671
AZARE_NEOPLASTIC_TRANSFORMATION_BY_STAT3_UP	0.0852485	0.0287478	0.0298157	0.0865332	0.0288444	0.505843	0.0860801	0.0266649	0.165392	0.062251	0.0280857
AZARE_STAT3_TARGETS	0.115542	0.0236293	0.328485	0.119111	0.033939	0.738768	0.116527	-0.0309046	0.667585	0.725226	0.00888787
BACOLOD_RESISTANCE_TO_ALKYLATING_AGENTS_DN	0.10191	-0.0088371	0.26739	0.0980662	-0.043412	0.0184142	0.0976462	-0.0437091	0.00231388	0.00087912	-0.0319861
BAE_BRCA1_TARGETS_DN	0.118399	-0.0022421	0.790139	0.114504	-0.0282758	0.738802	0.116686	-0.0294688	0.390022	0.813894	-0.0199956
BAE_BRCA1_TARGETS_UP	0.189924	0.01689	0.0221029	0.187309	0.0285414	0.00326678	0.183719	0.0329763	0.00118031	1.28e-05	0.0261359
BAELDE_DIABETIC_NEPHROPATHY_DN	0.117713	-0.0051939	0.927267	0.119198	0.00099887	0.521123	0.119702	0.0126792	0.293975	0.68979	0.00282807
BAELDE_DIABETIC_NEPHROPATHY_UP	0.0727977	-0.00818	0.228749	0.0745362	0.0382043	0.00078764	0.073869	0.0182809	0.351386	0.00363382	0.0161017
BAKKER_FOXO3_TARGETS_DN	0.0823962	0.0464384	9.17e-09	0.0794581	0.0247632	0.00252785	0.0811335	0.0177893	0.198546	1.69e-09	0.0296636
BAKKER_FOXO3_TARGETS_UP	0.0389214	-0.115278	0.00048423	0.0453826	-0.0695826	0.154459	0.0472116	-0.0218901	0.709216	0.00314558	-0.0689167
BALDWIN_PRKCI_TARGETS_UP	0.097445	0.0437526	0.0027385	0.0957752	0.00937707	0.614742	0.095036	0.0445933	0.00110942	0.00018899	0.0325744
BANDRES_RESPONSE_TO_CARMUSTIN_MGMT_24HR_DN	0.107625	-0.0025679	0.815093	0.107729	0.0150897	0.247575	0.108068	0.00137904	0.60189	0.647424	0.00463359
BANDRES_RESPONSE_TO_CARMUSTIN_MGMT_48HR_DN	0.0961461	-0.0222293	0.00209541	0.0938406	-0.0286749	0.0962049	0.0943854	0.00240154	0.783859	0.0075941	-0.0161676
BANDRES_RESPONSE_TO_CARMUSTIN_WITHOUT_MGMT_48HR_DN	0.117197	-0.0153481	0.173853	0.114881	0.0068607	0.214695	0.112278	-0.0608462	0.00696573	0.0112647	-0.0231112
BARIS_THYROID_CANCER_DN	0.128451	0.0190555	0.0859911	0.124266	-0.0084364	0.691605	0.129798	0.013955	0.520704	0.325529	0.00819134
BARIS_THYROID_CANCER_UP	0.199764	-0.0125149	0.60299	0.202979	0.0202697	0.740368	0.195339	-0.016248	0.297922	0.671971	-0.0028311
BARRIER_CANCER_RELAPSE_NORMAL_SAMPLE_DN	0.0580256	-0.0155693	0.51877	0.0622038	-0.0382505	0.881472	0.0681449	0.093869	0.00478639	0.0566416	0.0133498
BARRIER_CANCER_RELAPSE_NORMAL_SAMPLE_UP	0.0294348	-0.0276564	0.0218329	0.0297513	-0.0363724	0.452099	0.0296121	-0.0189955	0.0954429	0.0303726	-0.0276748
BARRIER_COLON_CANCER_RECURRENCE_UP	0.136501	-0.0106911	0.749392	0.132602	0.0117578	0.227402	0.129648	-0.0171838	0.510095	0.558597	-0.0053724
BASAKI_YBX1_TARGETS_DN	0.0758682	0.0123668	0.24149	0.0756241	-0.0472761	0.00288544	0.0763381	0.0171921	0.224042	0.00752107	-0.0059057
BASAKI_YBX1_TARGETS_UP	0.0834066	-0.0599571	0.00109652	0.0822316	-0.0246768	0.0786525	0.079889	-0.149775	2.31e-07	6.55e-09	-0.0781362
BASSO_B_LYMPHOCYTE_NETWORK	0.209084	-0.0188821	0.0312166	0.200361	-0.0114757	0.312814	0.196831	-0.0606545	1.96e-07	4.25e-07	-0.0303374
BASSO_CD40_SIGNALING_DN	0.035823	0.107381	5.63e-07	0.0357651	0.074738	0.0469066	0.0366911	0.08482	0.00075597	6.57e-09	0.0889798
BASSO_CD40_SIGNALING_UP	0.072243	0.0145601	0.0810012	0.0730078	0.0284819	0.120126	0.072862	0.0422198	0.0151164	0.00717204	0.0284206
BASSO_HAIRY_CELL_LEUKEMIA_UP	0.121343	0.0566354	0.00018307	0.121931	0.0470089	0.00080134	0.122933	0.1186	2.52e-13	3.87e-17	0.0740814
BAUS_TFF2_TARGETS_UP	0.0688555	0.0250684	0.120516	0.0809733	0.133196	0.00011	0.0788335	0.108483	8.88e-05	2.74e-07	0.0889157
BECKER_TAMOXIFEN_RESISTANCE_DN	0.10282	0.048086	0.00118509	0.106498	0.11749	2.59e-07	0.106644	0.0615812	0.00044563	6.41e-11	0.0757192
BECKER_TAMOXIFEN_RESISTANCE_UP	0.0989856	0.0544826	0.00108787	0.100653	0.0467719	0.157973	0.108005	0.105943	4.84e-06	2e-07	0.0690659
BEGUM_TARGETS_OF_PAX3_FOXO1_FUSION_DN	0.0251703	-0.0591026	0.79223	0.0267202	-0.0388512	0.467908	0.0287921	0.0846626	0.043327	0.21948	-0.0044304
BEGUM_TARGETS_OF_PAX3_FOXO1_FUSION_UP	0.060393	0.0102782	0.514652	0.0678814	0.093798	0.00276383	0.0655091	0.0983224	1.85e-05	4.49e-06	0.0674662
BEIER_GLIOMA_STEM_CELL_DN	0.0589906	0.0132768	0.759537	0.057847	0.00659694	0.768879	0.0574134	0.00807514	0.691248	0.935965	0.0093163
BEIER_GLIOMA_STEM_CELL_UP	0.0150644	-0.0224721	0.867787	0.014355	-0.0235739	0.93986	0.0157739	-0.102273	0.346086	0.865117	-0.0494396
BENITEZ_GBM_PROTEASOME_INHIBITION_RESPONSE	0.0817849	-0.0432064	0.00304167	0.0846359	-0.0028228	0.799755	0.0844619	-0.0111406	0.836852	0.0537383	-0.0190566
BENNETT_SYSTEMIC_LUPUS_ERYTHEMATOSUS	0.0251744	0.113446	0.0582752	0.0242639	-0.0209396	0.958785	0.03059	0.242986	0.00632026	0.0143158	0.111831
BENPORATH_CYCLING_GENES	0.0907453	-0.0238146	0.156573	0.0914501	0.020067	0.881472	0.0884035	-0.10917	3.53e-06	5.9e-05	-0.0376392
BENPORATH_EED_TARGETS	0.0305158	0.0314277	0.000961	0.0317658	0.0673241	8.89e-05	0.0321396	0.0675992	4.54e-07	1.97e-11	0.0554504
BENPORATH_ES_1	0.0843587	-0.0403869	0.00668368	0.0852414	-0.0019033	0.722311	0.0836553	-0.119095	2.51e-08	3.45e-08	-0.0537949
BENPORATH_ES_2	0.0143663	-0.152213	0.0382489	0.0136036	-0.177048	0.252977	0.0140738	-0.126067	0.207452	0.0531919	-0.151776
BENPORATH_ES_CORE_NINE_CORRELATED	0.077126	-0.0970815	1.99e-07	0.0822448	-0.0411552	0.0580464	0.0835284	-0.091196	2.26e-06	1.36e-11	-0.0764776
BENPORATH_ES_WITH_H3K27ME3	0.015353	-0.0198541	0.919889	0.0176007	0.0650083	0.0212038	0.0170126	0.0866287	0.00035575	0.00057889	0.0439276
BENPORATH_MYC_MAX_TARGETS	0.188289	-0.0086628	0.0336038	0.186396	0.00881421	0.0265063	0.184102	-0.0136629	0.0139995	0.0009483	-0.0045038
BENPORATH_MYC_TARGETS_WITH_EBOX	0.204094	0.00981321	0.00301187	0.199343	0.00495298	0.473899	0.19873	-0.0040915	0.638102	0.0296091	0.00355823
BENPORATH_NANOG_TARGETS	0.114612	0.00231237	0.512762	0.116082	0.0227574	1.83e-06	0.115218	0.00791642	0.182572	2.36e-05	0.0109954
BENPORATH_NOS_TARGETS	0.0606269	-0.0127865	0.473354	0.0637448	0.00251075	0.538023	0.0626316	-0.0259615	0.337673	0.55581	-0.0120791
BENPORATH_OCT4_TARGETS	0.0711931	-0.0293767	2.33e-05	0.0730854	-0.0128763	0.394161	0.0727249	-0.0365971	0.00069214	1.26e-06	-0.0262834
BENPORATH_PRC2_TARGETS	0.0100829	-0.027493	0.986195	0.0119695	0.118005	0.0108475	0.0123809	0.161473	3.26e-05	4.4e-05	0.0839953
BENPORATH_PROLIFERATION	0.147063	-0.0667864	0.0198329	0.144542	-0.0139788	0.535835	0.136035	-0.189654	7.01e-10	2.64e-09	-0.0901397
BENPORATH_SOX2_TARGETS	0.111493	-0.0082597	0.0602904	0.112052	-0.0073177	0.415057	0.112218	-0.0072539	0.078257	0.0522426	-0.0076105
BENPORATH_SUZ12_TARGETS	0.0192758	-0.0111666	0.75688	0.0212159	0.0326737	0.109703	0.021158	0.0777229	0.00045413	0.0023778	0.0330767
BERENJENO_ROCK_SIGNALING_NOT_VIA_RHOA_DN	0.197392	0.00146835	0.853757	0.197519	0.0118917	0.226401	0.197496	0.016448	0.2244	0.393018	0.00993603
BERENJENO_ROCK_SIGNALING_NOT_VIA_RHOA_UP	0.0642933	-0.0683643	0.0006245	0.0633532	-0.225315	8.19e-10	0.0652606	-0.0078098	0.654877	1.48e-10	-0.100496
BERENJENO_TRANSFORMED_BY_RHOA_DN	0.0978816	0.0904062	3.31e-09	0.096605	0.0569868	0.00646678	0.0979739	0.156576	3.75e-13	1.18e-20	0.101323
BERENJENO_TRANSFORMED_BY_RHOA_FOREVER_DN	0.145855	0.00411769	0.513733	0.148667	0.12538	1.58e-06	0.147261	-0.0125242	0.517166	5.19e-05	0.0389912
BERENJENO_TRANSFORMED_BY_RHOA_REVERSIBLY_DN	0.0297005	-0.280145	3.61e-05	0.0329947	-0.28166	3.57e-05	0.0338741	-0.144044	0.0453465	1.77e-08	-0.235283
BERENJENO_TRANSFORMED_BY_RHOA_UP	0.165819	-0.0340727	0.0266587	0.162775	0.0165134	0.528377	0.159845	-0.0885133	4.98e-06	1.08e-05	-0.0353575
BERNARD_PPAPDC1B_TARGETS_DN	0.0253312	0.00437666	0.69034	0.0283106	0.00849598	0.940648	0.029097	0.0987208	0.00217044	0.04103	0.0371978
BERNARD_PPAPDC1B_TARGETS_UP	0.0931973	-0.0201343	0.133427	0.0950959	-0.0316888	0.183154	0.0947609	0.0166357	0.927896	0.27109	-0.0117291
BERTUCCI_INVASIVE_CARCINOMA_DUCTAL_VS_LOBULAR_DN	0.0360617	-0.0712237	0.00123633	0.0395474	-0.0471555	0.361628	0.0353591	-0.0940399	0.00430391	0.0001939	-0.0708064
BERTUCCI_INVASIVE_CARCINOMA_DUCTAL_VS_LOBULAR_UP	0.101907	0.00913392	0.862646	0.0951539	0.0122407	0.759641	0.0945268	-0.0192573	0.194704	0.660728	0.00070579
BERTUCCI_MEDULLARY_VS_DUCTAL_BREAST_CANCER_DN	0.0469427	0.0159626	0.367184	0.0481733	0.00657327	0.886925	0.0467951	0.0349856	0.158517	0.431353	0.0191738
BERTUCCI_MEDULLARY_VS_DUCTAL_BREAST_CANCER_UP	0.0662081	-0.0179273	0.339178	0.0671171	0.0492436	0.00118152	0.0661168	-0.0141427	0.707808	0.012062	0.00572454
BHAT_ESR1_TARGETS_NOT_VIA_AKT1_DN	0.0230545	0.0671276	0.0082259	0.0292942	0.184884	0.00045435	0.0299097	0.110859	0.00012214	1.16e-07	0.120957
BHAT_ESR1_TARGETS_NOT_VIA_AKT1_UP	0.0337859	-0.0198365	0.232722	0.0346374	0.0111997	0.797188	0.035385	-0.0355801	0.0231197	0.0914118	-0.014739
BHAT_ESR1_TARGETS_VIA_AKT1_DN	0.0212161	0.0841166	0.0107777	0.0264167	0.223268	3.71e-06	0.0271377	0.11097	0.00388833	4.34e-08	0.139452
BHAT_ESR1_TARGETS_VIA_AKT1_UP	0.0535671	-0.0299606	0.00739841	0.0544611	-0.0006499	0.971596	0.0549963	-0.0458088	0.00451391	0.002101	-0.0254731
BHATI_G2M_ARREST_BY_2METHOXYESTRADIOL_DN	0.124688	0.00104229	0.739873	0.123027	0.0116232	0.044277	0.126025	-0.0099471	0.462793	0.211691	0.00090614
BHATI_G2M_ARREST_BY_2METHOXYESTRADIOL_UP	0.120212	-0.0093218	0.771519	0.122348	0.0453197	0.00672536	0.11653	-0.012238	0.502546	0.0642681	0.00791997
BHATTACHARYA_EMBRYONIC_STEM_CELL	0.270005	-0.0143722	0.159034	0.269242	0.00916712	0.797188	0.261061	-0.074327	5.34e-08	1.33e-06	-0.0265107
BIDUS_METASTASIS_DN	0.0301278	0.0988917	1.04e-07	0.0320462	0.127345	1.83e-06	0.0331204	0.18996	2.64e-12	8.17e-22	0.138732
BIDUS_METASTASIS_UP	0.114541	-0.0200431	0.247614	0.112438	-0.0154883	0.526652	0.110228	-0.125952	1.32e-07	3.07e-06	-0.0538279
BILANGES_RAPAMYCIN_SENSITIVE_GENES	0.187384	-0.0142223	0.0054249	0.189221	-0.022708	0.00179603	0.184975	-0.0212533	0.00779923	1.15e-05	-0.0193946
BILANGES_RAPAMYCIN_SENSITIVE_VIA_TSC1_AND_TSC2	0.379234	-0.0158807	0.0014716	0.367926	-0.018665	0.00067061	0.359101	-0.048879	4.22e-08	2.11e-11	-0.0278082
BILANGES_SERUM_AND_RAPAMYCIN_SENSITIVE_GENES	0.673995	-0.0057466	0.0154755	0.672126	-0.0030401	0.170174	0.664288	0.00030235	0.835065	0.0568373	-0.0028281
BILANGES_SERUM_RESPONSE_TRANSLATION	0.509846	-0.0316483	1.16e-14	0.514231	-0.0233768	1.03e-05	0.505185	-0.0203303	0.00073313	1.18e-19	-0.0251185
BILANGES_SERUM_SENSITIVE_GENES	0.12664	-0.0328059	2.3e-05	0.125557	-0.0329027	0.00057065	0.126264	-0.0370918	8.75e-05	4.67e-10	-0.0342668
BILANGES_SERUM_SENSITIVE_VIA_TSC2	0.172952	0.0213736	0.00580665	0.180533	0.100555	2.35e-06	0.176278	0.0227963	0.151275	4.57e-07	0.0482415
BILBAN_B_CLL_LPL_DN	0.171205	0.0181257	0.17674	0.169542	0.0259264	0.421605	0.172528	0.0793115	0.00085634	0.00365716	0.0411212
BILBAN_B_CLL_LPL_UP	0.0451954	0.0318234	0.678031	0.0464802	-0.0088758	0.942318	0.0468866	0.0681478	0.0241714	0.214162	0.0303651
BILD_CTNNB1_ONCOGENIC_SIGNATURE	0.0782608	-0.0296025	0.035442	0.0799846	-0.0737993	0.00024892	0.0776879	-0.108864	9.4e-06	2.44e-08	-0.0707553
BILD_E2F3_ONCOGENIC_SIGNATURE	0.0361232	-0.0097831	0.984683	0.0367394	0.059395	0.0055085	0.0374661	-0.0047927	0.992719	0.106995	0.0149397
BILD_HRAS_ONCOGENIC_SIGNATURE	0.0915923	-0.0288715	0.288759	0.0926812	-0.026965	0.592458	0.0937133	0.0285647	0.14973	0.291479	-0.0090906
BILD_MYC_ONCOGENIC_SIGNATURE	0.0663614	-0.069574	1.43e-08	0.0658446	-0.0617397	0.00295749	0.0680432	-0.0549723	9.03e-05	2.23e-12	-0.0620953
BILD_SRC_ONCOGENIC_SIGNATURE	0.0275933	-0.0296822	0.44011	0.0301914	-0.0268358	0.398151	0.0318447	0.0494475	0.273632	0.414813	-0.0023568
BIOCARTA_AGR_PATHWAY	0.10505	0.0134241	0.124472	0.105382	0.0262513	0.0455978	0.106401	0.0548894	0.00577143	0.00211751	0.0315216
BIOCARTA_ALK_PATHWAY	0.0175855	-6.89e-08	0.627338	0.0190882	-0.129108	0.0646557	0.0187938	0.00546638	0.936125	0.365293	-0.0412139
BIOCARTA_AT1R_PATHWAY	0.146925	0.0398776	0.0001836	0.144309	0.0614957	0.00046201	0.145644	0.0371831	0.00864372	1.78e-07	0.0461855
BIOCARTA_ATRBRCA_PATHWAY	0	NA	3.48e-05	0	#NAME?	0.0361182	0	#NAME?	0.00178401	4.92e-07	NA
BIOCARTA_BAD_PATHWAY	0.0953722	-0.0214832	0.23276	0.0944645	0.00942951	0.99293	0.0866027	-0.0824337	0.00300403	0.024104	-0.0314958
BIOCARTA_BCR_PATHWAY	0.138085	0.0473134	2.72e-05	0.137182	0.0657572	3.85e-05	0.137945	0.0498062	0.00095725	4.12e-10	0.0542923
BIOCARTA_BIOPEPTIDES_PATHWAY	0.0971793	0.0626105	1.29e-05	0.0932547	0.0477888	0.0310158	0.0944827	0.035421	0.027955	2.09e-06	0.0486068
BIOCARTA_CARM_ER_PATHWAY	0.0650737	0.00786933	0.641601	0.0656932	0.0642482	0.0115129	0.065885	0.0363023	0.562905	0.0894506	0.0361399
BIOCARTA_CERAMIDE_PATHWAY	0.0457837	-0.0194997	0.752311	0.0417593	-0.178175	3.57e-05	0.0437125	-0.0275228	0.905171	0.00165654	-0.0750658
BIOCARTA_CREB_PATHWAY	0.0997845	0.0606599	0.0395256	0.0961811	0.0998605	0.0024707	0.091601	-0.0063509	0.475152	0.00281936	0.0513898
BIOCARTA_CTCF_PATHWAY	0.0546677	0.115689	0.00282711	0.0495546	-0.0424352	0.512162	0.0488472	0.0871067	0.154939	0.0100285	0.0534536
BIOCARTA_DEATH_PATHWAY	0.0706617	-0.0133362	0.6841	0.0680106	-0.0487242	0.0777212	0.0722367	0.0626775	0.0544998	0.0693103	0.00020574
BIOCARTA_EDG1_PATHWAY	0.0883344	0.00827398	0.82225	0.084933	0.0417865	0.354157	0.0791911	0.0244399	0.714883	0.791245	0.0248335
BIOCARTA_EGF_PATHWAY	0.0846481	0.02459	0.0861626	0.0897027	0.0604102	0.116195	0.0911605	0.0351389	0.0368567	0.0148141	0.0400464
BIOCARTA_EIF4_PATHWAY	0.16061	0.0225623	0.281802	0.160433	0.0611365	0.00542384	0.152523	-0.0289094	0.124873	0.00882444	0.0182631
BIOCARTA_ERK_PATHWAY	0.123832	0.0453071	4.15e-05	0.117769	0.0050166	0.450837	0.119336	0.0234139	0.0748695	0.00014739	0.0245792
BIOCARTA_FAS_PATHWAY	0.0950844	0.00037102	0.818448	0.100929	0.03718	0.00939804	0.09989	-0.0058167	0.95563	0.132175	0.0105781
BIOCARTA_FCER1_PATHWAY	0.113511	0.0377317	0.00633542	0.114063	0.0503639	0.0226401	0.117031	0.039426	0.0120619	0.00017695	0.0425072
BIOCARTA_FMLP_PATHWAY	0.128304	0.0609505	5.6e-07	0.121304	0.059877	0.00276383	0.125212	0.0718229	0.0001707	1.19e-10	0.0642168
BIOCARTA_G1_PATHWAY	0.0695723	0.015065	0.213325	0.0661947	0.00967611	0.367988	0.0656932	0.000648	0.809294	0.479951	0.00846305
BIOCARTA_G2_PATHWAY	0.0691867	-0.0251242	0.598975	0.0680021	-0.0341902	0.888887	0.067679	-0.105274	0.00268444	0.0414566	-0.054863
BIOCARTA_GH_PATHWAY	0.0242241	0.0783633	0.0885112	0.0223712	-0.0052623	0.880794	0.0234611	0.00167659	0.533064	0.383952	0.0249259
BIOCARTA_GLEEVEC_PATHWAY	0.106219	0.0741766	0.00158975	0.10388	0.0642272	0.0122663	0.105403	0.0705578	0.00560984	1.59e-05	0.0696539
BIOCARTA_GPCR_PATHWAY	0.165785	0.0453239	0.00044279	0.166835	0.0819858	5.45e-05	0.163822	0.0188536	0.340375	1.59e-06	0.0487211
BIOCARTA_HDAC_PATHWAY	0.123363	0.0275141	0.00941253	0.121711	0.0368307	0.00542598	0.117212	-0.0110322	0.720259	0.00232986	0.0177709
BIOCARTA_HER2_PATHWAY	0.0275813	0.0778066	0.131588	0.025426	-0.0543771	0.792966	0.0281875	0.0208336	0.931908	0.587947	0.0147543
BIOCARTA_HIVNEF_PATHWAY	0.0839947	0.00685481	0.876793	0.0857019	0.017601	0.544281	0.0842241	0.00962621	0.572693	0.857761	0.0113607
BIOCARTA_IGF1R_PATHWAY	0.100476	0.0221012	0.124323	0.101103	0.0948236	0.0351008	0.0938193	-0.0407107	0.108524	0.0179753	0.0254047
BIOCARTA_IL1R_PATHWAY	0.0679437	0.105718	0.00244922	0.0598321	0.0282156	0.273396	0.0660045	0.161742	7.11e-07	1.2e-07	0.0985587
BIOCARTA_IL2_PATHWAY	0.101889	0.0601264	0.00223534	0.102411	0.0749747	0.00106997	0.107177	0.0760896	0.00450218	2.02e-06	0.0703969
BIOCARTA_IL2RB_PATHWAY	0.0841924	0.040497	0.00142373	0.0839357	0.0420199	0.0153795	0.0819904	0.0208266	0.0826365	0.00018391	0.0344478
BIOCARTA_INFLAM_PATHWAY	0.0247525	0.00984797	0.70421	0.0203408	-0.365222	0.0406136	0.0207618	0.0707404	0.153791	0.093028	-0.0948778
BIOCARTA_INTEGRIN_PATHWAY	0.155766	0.0632603	3.51e-06	0.156228	0.101681	2.5e-07	0.151989	0.0541175	0.0037125	1.93e-12	0.0730196
BIOCARTA_KERATINOCYTE_PATHWAY	0.0795927	0.0306335	0.0204159	0.0779204	0.0694358	0.0430694	0.0805754	0.0891133	0.00024255	2.87e-05	0.0630609
BIOCARTA_MAPK_PATHWAY	0.0658976	0.0485831	0.00118248	0.0627926	0.0236039	0.622127	0.0666763	0.107043	9.13e-06	1.32e-06	0.0597434
BIOCARTA_MET_PATHWAY	0.132533	0.0661553	6.1e-09	0.128874	0.0465193	0.0695357	0.13009	0.075327	9.21e-05	1.99e-11	0.0626672
BIOCARTA_NFAT_PATHWAY	0.112775	0.02619	0.0229115	0.114662	0.0652727	8.2e-05	0.109922	-0.0169592	0.186265	4.42e-05	0.0248345
BIOCARTA_NFKB_PATHWAY	0.0417256	0.024662	0.596769	0.0373813	-0.0051897	0.662002	0.0401933	0.152205	0.00315966	0.0374944	0.0572256
BIOCARTA_NKT_PATHWAY	0.00314722	Inf	0.0003036	0	NA	0.935094	0	NA	0.00098031	3.62e-05	NA
BIOCARTA_NO1_PATHWAY	0.13051	0.0138453	0.118032	0.132918	0.076073	0.00047837	0.12204	-0.0288445	0.161643	0.00072955	0.0203579
BIOCARTA_NTHI_PATHWAY	0.0724186	0.161143	0.00037202	0.0681416	0.152079	0.00382167	0.0734637	0.302794	1.21e-08	9.22e-12	0.205339
BIOCARTA_NUCLEARRS_PATHWAY	0	NA	0.00553375	0	NA	0.0049942	0	NA	0.504399	0.00104111	NA
BIOCARTA_P38MAPK_PATHWAY	0.0918713	0.0293372	0.0281654	0.0898757	0.0553899	0.00786886	0.0905235	0.067146	0.00390853	9.74e-05	0.0506243
BIOCARTA_PDGF_PATHWAY	0.0901121	0.0105446	0.657713	0.0930782	0.0159551	0.817638	0.0962674	0.0404902	0.0465302	0.287474	0.02233
BIOCARTA_PPARA_PATHWAY	0.090191	-0.0189115	0.230358	0.0911282	0.0132489	0.704694	0.0904141	0.0397064	0.185973	0.320798	0.0113479
BIOCARTA_PTDINS_PATHWAY	0.11022	-0.0073472	0.611525	0.108789	0.0349624	0.386988	0.0993183	-0.0498124	0.257531	0.469984	-0.0073991
BIOCARTA_PYK2_PATHWAY	0.155563	0.0485699	1.59e-06	0.153274	0.0744736	3.88e-05	0.156707	0.0659558	0.00067041	2.1e-11	0.0629998
BIOCARTA_RACCYCD_PATHWAY	0.157535	0.0431867	0.0462075	0.141926	0.0566755	0.00662132	0.140836	0.0156097	0.304722	0.00497328	0.0384906
BIOCARTA_RAS_PATHWAY	0.162154	0.0401801	0.0145361	0.147989	0.0278545	0.134461	0.141171	-0.0045935	0.970613	0.0510469	0.0211471
BIOCARTA_RHO_PATHWAY	0.136778	0.0277955	0.182228	0.13427	0.0307196	0.1047	0.136273	0.0524611	0.0616595	0.0358745	0.036992
BIOCARTA_STRESS_PATHWAY	0.0733186	0.0254729	0.171582	0.0700885	0.0544478	0.199388	0.0759145	0.148364	4.36e-05	0.00015569	0.0760948
BIOCARTA_TCR_PATHWAY	0.124639	0.0431228	0.0058218	0.121844	0.0473951	0.0146659	0.123708	0.0582329	0.00076435	1.01e-05	0.0495836
BIOCARTA_TNFR1_PATHWAY	0.0936048	-0.0009419	0.862879	0.098068	0.0298073	0.0428663	0.0978968	-7.37e-08	0.997738	0.359544	0.00962175
BIOCARTA_TOLL_PATHWAY	0.104292	0.030294	0.0588188	0.0982719	0.0217895	0.098454	0.107153	0.128568	1.29e-05	1.14e-05	0.0602172
BIOCARTA_TPO_PATHWAY	0.0947358	0.0402223	0.0723247	0.0968582	0.0329442	0.415879	0.100846	0.0591622	0.0410958	0.0372221	0.0441096
BIOCARTA_VDR_PATHWAY	0.0864488	-0.112334	9.26e-06	0.0860026	-0.139614	0.00128545	0.0893258	-0.157113	6.23e-07	4.17e-12	-0.136353
BIOCARTA_VEGF_PATHWAY	0.125766	-0.0079483	0.301072	0.121774	-0.0287656	0.0345688	0.116897	-0.113458	3.68e-05	4.79e-05	-0.0500572
BIOCARTA_VIP_PATHWAY	0.156974	0.01979	0.159131	0.152312	0.0522304	0.0499387	0.151559	0.0222851	0.250462	0.0528644	0.0314352
BIOCARTA_WNT_PATHWAY	0.0585546	-0.0115822	0.20823	0.0605605	0.0690898	0.19589	0.0603687	0.0138125	0.931908	0.36552	0.0237734
BLALOCK_ALZHEIMERS_DISEASE_DN	0.235894	0.00198454	0.399123	0.231671	0.0106639	0.133683	0.22572	-0.0050411	0.423032	0.270341	0.00253578
BLALOCK_ALZHEIMERS_DISEASE_INCIPIENT_DN	0.182694	-0.0095314	0.0557645	0.177399	-0.0067002	0.614742	0.174685	-0.0178544	0.0485508	0.0463816	-0.011362
BLALOCK_ALZHEIMERS_DISEASE_INCIPIENT_UP	0.0695248	-0.0069385	0.531943	0.0713573	-0.0123822	0.0807158	0.0711108	-0.0089456	0.187868	0.140649	-0.0094221
BLALOCK_ALZHEIMERS_DISEASE_UP	0.13308	-0.0022104	0.874004	0.135113	-0.004005	0.660519	0.13679	0.00619882	0.519487	0.87855	-5.51e-06
BLANCO_MELO_BETA_INTERFERON_TREATED_BRONCHIAL_EPITHELIAL_CELLS_DN	0.0080055	0.131543	0.00551088	0.00802421	0.071928	0.651871	0.00738804	0.184614	0.0079026	0.00188148	0.129362
BLANCO_MELO_BETA_INTERFERON_TREATED_BRONCHIAL_EPITHELIAL_CELLS_UP	0.0275253	-0.0481464	0.472456	0.0294998	-0.0333828	0.399431	0.0295547	0.042822	0.113844	0.262425	-0.0129024
BLANCO_MELO_BRONCHIAL_EPITHELIAL_CELLS_INFLUENZA_A_DEL_NS1_INFECTION_DN	0.0170946	-0.272494	0.097914	0.0200153	-0.0119421	0.391698	0.0179311	-0.654171	7.87e-07	5.08e-06	-0.312869
BLANCO_MELO_BRONCHIAL_EPITHELIAL_CELLS_INFLUENZA_A_DEL_NS1_INFECTION_UP	0.0396873	0.0142772	0.554337	0.0418781	0.047041	0.285918	0.0420492	0.114712	4.75e-07	1.14e-05	0.0586766
BLANCO_MELO_BRONCHIAL_EPITHELIAL_CELLS_INFLUENZA_A_INFECTION_DN	0.0698561	0.00318056	0.919889	0.0688818	-0.0246096	0.287087	0.0680386	0.00072504	0.787159	0.790877	-0.0069013
BLANCO_MELO_BRONCHIAL_EPITHELIAL_CELLS_INFLUENZA_A_INFECTION_UP	0.0236001	-0.0242185	0.325135	0.0215459	-0.248202	4.97e-08	0.0234834	0.00173896	0.873152	2.58e-06	-0.0902271
BLANCO_MELO_COVID19_BRONCHIAL_EPITHELIAL_CELLS_SARS_COV_2_INFECTION_DN	0.0123791	0.162095	0.0213429	0.0132351	0.289891	0.00798745	0.0117293	0.0435416	0.717332	0.0061867	0.165176
BLANCO_MELO_COVID19_BRONCHIAL_EPITHELIAL_CELLS_SARS_COV_2_INFECTION_UP	0.0502596	0.0214585	0.342519	0.0489801	0.00739438	0.376535	0.0506443	0.0881482	0.00034524	0.00272562	0.0390004
BLANCO_MELO_COVID19_SARS_COV_2_INFECTION_A594_ACE2_EXPRESSING_CELLS_DN	0.101448	0.0531129	4.01e-09	0.0988391	0.0691805	1.7e-05	0.0963622	0.053367	1.99e-05	1.21e-15	0.0585535
BLANCO_MELO_COVID19_SARS_COV_2_INFECTION_A594_ACE2_EXPRESSING_CELLS_RUXOLITINIB_DN	0.111372	0.00132061	0.83492	0.109381	0.00070714	0.654061	0.108131	0.017934	0.0647059	0.350888	0.00665392
BLANCO_MELO_COVID19_SARS_COV_2_INFECTION_A594_ACE2_EXPRESSING_CELLS_RUXOLITINIB_UP	0.0436131	-0.0605462	0.0368732	0.0453832	-0.0793706	0.00460669	0.0473934	0.0260961	0.720259	0.00618905	-0.0379402
BLANCO_MELO_COVID19_SARS_COV_2_INFECTION_A594_ACE2_EXPRESSING_CELLS_UP	0.0498337	-0.0188777	0.657989	0.0506626	-0.0551493	0.191061	0.0530121	0.0726994	0.0255985	0.0746826	-0.0004426
BLANCO_MELO_COVID19_SARS_COV_2_INFECTION_A594_CELLS_DN	0.024746	0.289545	6.77e-14	0.019792	0.249507	0.00014469	0.0190929	0.10827	0.0126049	1.23e-16	0.215774
BLANCO_MELO_COVID19_SARS_COV_2_INFECTION_A594_CELLS_UP	0.011524	0.0107866	0.891839	0.0119424	0.0117135	0.77893	0.0134876	-0.0057274	0.841022	0.982614	0.0055909
BLANCO_MELO_COVID19_SARS_COV_2_INFECTION_CALU3_CELLS_UP	0.040797	-0.0126236	0.587144	0.0421463	-0.0224037	0.778338	0.0440157	0.0826099	0.00152198	0.0241376	0.0158609
BLANCO_MELO_COVID19_SARS_COV_2_LOW_MOI_INFECTION_A594_ACE2_EXPRESSING_CELLS_UP	0.0633579	-0.0515122	0.219029	0.0650021	-0.0689888	0.040325	0.0655142	0.0632163	0.0243892	0.00971186	-0.0190949
BLANCO_MELO_COVID19_SARS_COV_2_POS_PATIENT_LUNG_TISSUE_DN	0.0495688	0.0418558	1.46e-05	0.0490978	0.00283806	0.700212	0.0516088	0.0649538	3.49e-08	1.58e-10	0.0365492
BLANCO_MELO_COVID19_SARS_COV_2_POS_PATIENT_LUNG_TISSUE_UP	0.0249296	0.00100495	0.296073	0.0240907	0	0.642167	0.0249672	0.0346798	0.0802083	0.212472	0.0118949
BLANCO_MELO_HUMAN_PARAINFLUENZA_VIRUS_3_INFECTION_A594_CELLS_DN	0.00515469	0.287802	0.0047652	0.00489878	0.481127	0.00350549	0.00361011	-0.0431761	0.980986	0.00119178	0.241918
BLANCO_MELO_HUMAN_PARAINFLUENZA_VIRUS_3_INFECTION_A594_CELLS_UP	0.0430641	-0.0291186	0.180502	0.0449444	-0.0362332	0.352855	0.0461351	0.044119	0.015458	0.0313964	-0.0070776
BLANCO_MELO_INFLUENZA_A_INFECTION_A594_CELLS_DN	0.0650158	0.0232926	0.00312338	0.0643348	0.0107049	0.994387	0.0631711	0.00387245	0.594933	0.0500739	0.0126233
BLANCO_MELO_INFLUENZA_A_INFECTION_A594_CELLS_UP	0.111688	-0.0170937	0.128895	0.103013	-0.0467734	0.25792	0.10613	-0.0106668	0.519487	0.229617	-0.0248446
BLANCO_MELO_MERS_COV_INFECTION_MCR5_CELLS_DN	0.105736	0.0537359	1.92e-20	0.106112	0.0836327	4.07e-12	0.104357	0.0743959	1.53e-16	7.12e-44	0.0705882
BLANCO_MELO_MERS_COV_INFECTION_MCR5_CELLS_UP	0.0267826	-0.0221884	0.38216	0.0276899	0.0370262	0.67253	0.0273152	0.0685379	0.006595	0.0470071	0.0277919
BLANCO_MELO_RESPIRATORY_SYNCYTIAL_VIRUS_INFECTION_A594_CELLS_DN	0.00339924	-0.10883	0.570362	0.00410798	-0.0375562	0.845198	0.00316901	-0.133387	0.18924	0.57117	-0.0932578
BLANCO_MELO_RESPIRATORY_SYNCYTIAL_VIRUS_INFECTION_A594_CELLS_UP	0.0314421	-0.0377915	0.242203	0.0333832	-0.0228161	0.724159	0.0337098	0.0340429	0.0102341	0.0490238	-0.0088549
BLUM_RESPONSE_TO_SALIRASIB_DN	0.124941	-0.0327668	0.145452	0.123822	-0.0159384	0.383088	0.117644	-0.164464	1.21e-07	1.33e-06	-0.0710564
BLUM_RESPONSE_TO_SALIRASIB_UP	0.123128	-0.0014986	0.233224	0.121957	0.0128281	0.642475	0.125948	-0.0006196	0.691554	0.604809	0.00356996
BOCHKIS_FOXA2_TARGETS	0.0603485	7.55e-05	0.838338	0.0595716	-0.0037733	0.956858	0.059443	-0.0130907	0.720259	0.98166	-0.0055962
BOGNI_TREATMENT_RELATED_MYELOID_LEUKEMIA_DN	0.0692444	0.0359196	0.0274877	0.0687951	0.091094	0.00471025	0.0706042	0.0109139	0.124665	0.00117684	0.0459758
BOGNI_TREATMENT_RELATED_MYELOID_LEUKEMIA_UP	0.112463	0.00827348	0.570362	0.103814	-0.0746389	8.45e-06	0.110363	-0.0131507	0.497976	0.00023444	-0.0265054
BOHN_PRIMARY_IMMUNODEFICIENCY_SYNDROM_DN	0.0431452	0.0119404	0.31618	0.0474991	0.0553461	0.184256	0.04624	0.125558	0.00578147	0.0137973	0.0642816
BOHN_PRIMARY_IMMUNODEFICIENCY_SYNDROM_UP	0.182723	-0.0118718	0.750035	0.182265	0.043207	0.391698	0.17542	-0.0768164	0.00021048	0.00356475	-0.0151604
BONCI_TARGETS_OF_MIR15A_AND_MIR16_1	0.0538957	0.0214431	0.0273517	0.0538226	0.00983267	0.607449	0.0554677	0.0329401	0.169671	0.0679609	0.0214053
BONOME_OVARIAN_CANCER_POOR_SURVIVAL_UP	0.0898427	0.0307049	0.0344909	0.0887785	0.0548322	0.0768797	0.0875843	0.0257437	0.351674	0.0301401	0.0370936
BONOME_OVARIAN_CANCER_SURVIVAL_OPTIMAL_DEBULKING	0.0823276	0.00364043	0.453252	0.0808225	-0.0116908	0.396251	0.0799574	0.0159507	0.240991	0.392564	0.00263346
BONOME_OVARIAN_CANCER_SURVIVAL_SUBOPTIMAL_DEBULKING	0.0413086	-0.0081181	0.313735	0.0433483	0.00012514	0.998732	0.0439856	0.00172742	0.596826	0.763386	-0.0020885
BOQUEST_STEM_CELL_CULTURED_VS_FRESH_DN	0.0296611	0.0814114	0.0723697	0.0289262	-0.045108	0.91826	0.0283224	0.125652	0.188006	0.187229	0.0539852
BOQUEST_STEM_CELL_CULTURED_VS_FRESH_UP	0.0785742	0.00465171	0.476324	0.0795366	0.00541678	0.76506	0.0802367	0.0378383	0.00495386	0.049229	0.0159689
BOQUEST_STEM_CELL_DN	0.0302007	-0.0567459	5.2e-06	0.0318007	-0.0159646	0.369757	0.0325565	-0.0336086	0.0241452	7.45e-06	-0.0354397
BOQUEST_STEM_CELL_UP	0.0433093	0.122885	1.3e-08	0.0451425	0.133592	4.35e-06	0.0445298	0.158087	5.27e-11	4.54e-21	0.138188
BORCZUK_MALIGNANT_MESOTHELIOMA_DN	0.0192088	0.0155668	0.956616	0.020099	-0.0968878	0.00736649	0.0211859	-0.0133379	0.884558	0.118248	-0.031553
BORCZUK_MALIGNANT_MESOTHELIOMA_UP	0.219325	0.0111614	0.189976	0.210887	0.015406	0.347137	0.203756	-0.0481132	2.5e-07	2.96e-06	-0.0071819
BORLAK_LIVER_CANCER_EGF_UP	0.207069	0.0405644	1.85e-05	0.195814	-0.0281914	0.0172631	0.198028	0.0194651	0.0597802	3.38e-06	0.0106127
BOSCO_ALLERGEN_INDUCED_TH2_ASSOCIATED_MODULE	0.0407574	-0.0873691	4.68e-08	0.0427009	-0.109421	6.02e-07	0.0416561	-0.097589	8.34e-06	2.26e-16	-0.0981263
BOSCO_EPITHELIAL_DIFFERENTIATION_MODULE	0.0452687	0.00670386	0.817588	0.0413176	-0.0641856	0.121131	0.042951	0.0120031	0.618202	0.471071	-0.0151596
BOSCO_INTERFERON_INDUCED_ANTIVIRAL_MODULE	0.00493073	-0.24543	0.159883	0.0060766	-0.387993	0.00089338	0.00734979	-0.0902667	0.938042	0.00665658	-0.24123
BOSCO_TH1_CYTOTOXIC_MODULE	0.0127186	-0.0569964	0.14056	0.0124032	-0.0326454	0.663387	0.0137082	-0.0834301	0.593919	0.447462	-0.0576906
BOUDOUKHA_BOUND_BY_IGF2BP2	0.233998	0.0219977	3.99e-06	0.231934	0.0335155	6.01e-07	0.226266	-0.0037188	0.978449	9.06e-10	0.0172648
BOYAULT_LIVER_CANCER_SUBCLASS_G1_DN	0.077621	0.0365442	0.124302	0.0731421	0.0742999	0.0108057	0.0767368	0.0511295	0.00262996	0.00032622	0.0539912
BOYAULT_LIVER_CANCER_SUBCLASS_G1_UP	0.0964236	-0.013926	0.28373	0.0981505	-0.0248087	0.122836	0.0975655	-0.0579219	9.09e-07	5.3e-06	-0.0322189
BOYAULT_LIVER_CANCER_SUBCLASS_G12_UP	0.052435	0.113847	4.23e-07	0.0513397	0.109265	0.00060464	0.0527065	0.0730566	0.00663002	6.7e-10	0.0987227
BOYAULT_LIVER_CANCER_SUBCLASS_G123_DN	0.0216466	0.0754291	0.189605	0.0210698	-0.0264728	0.942523	0.0206796	0.101735	0.130797	0.276058	0.0502305
BOYAULT_LIVER_CANCER_SUBCLASS_G123_UP	0.15144	-0.0767783	4.59e-07	0.152543	-0.0484651	0.0476539	0.142754	-0.157435	8.33e-14	2.17e-18	-0.0942263
BOYAULT_LIVER_CANCER_SUBCLASS_G2	0.0148159	-0.0699955	0.586819	0.0141076	-0.0979896	0.764099	0.0155807	-0.0130559	0.980775	0.949435	-0.060347
BOYAULT_LIVER_CANCER_SUBCLASS_G23_UP	0.0743694	-0.0206437	0.819408	0.0769989	0.0994784	0.0868408	0.0723973	-0.170115	0.0162963	0.0354913	-0.0304267
BOYAULT_LIVER_CANCER_SUBCLASS_G3_DN	0.0143251	-5.04e-07	0.929975	0.0129639	-0.157044	0.051766	0.0134986	-0.0726145	0.401807	0.246213	-0.0765531
BOYAULT_LIVER_CANCER_SUBCLASS_G3_UP	0.174116	-0.0473845	2.65e-07	0.175526	-0.0149154	0.478107	0.171631	-0.0796732	2.32e-12	2.8e-16	-0.0473243
BOYAULT_LIVER_CANCER_SUBCLASS_G5_DN	0.129298	0.0446149	5.05e-05	0.12731	0.0386758	0.00268972	0.126146	0.040228	0.0136813	4.14e-07	0.0411729
BOYAULT_LIVER_CANCER_SUBCLASS_G6_UP	0.0408875	0.0266282	0.0919875	0.0362062	-0.125114	4.62e-05	0.0382861	-0.0297619	0.299457	0.00013583	-0.0427491
BOYLAN_MULTIPLE_MYELOMA_C_CLUSTER_DN	0.0934319	0.0911818	2.17e-05	0.0953056	0.0594688	0.0208987	0.102357	0.0775265	0.00067068	7.98e-08	0.076059
BOYLAN_MULTIPLE_MYELOMA_C_CLUSTER_UP	0.0305505	-0.195944	0.00067052	0.0312715	-0.160517	0.0128223	0.0321001	-0.16222	0.00039031	7.08e-07	-0.172894
BOYLAN_MULTIPLE_MYELOMA_C_D_DN	0.0287489	0.133745	1.75e-09	0.0302926	0.130612	5.59e-07	0.0299682	0.147698	1.17e-12	2.27e-24	0.137352
BOYLAN_MULTIPLE_MYELOMA_C_D_UP	0.0822538	-0.0451427	0.00015254	0.0837292	0.0125827	0.49169	0.0835807	-0.0551468	6.74e-05	1.02e-06	-0.0292356
BOYLAN_MULTIPLE_MYELOMA_C_DN	0.0722739	0.0504701	0.028862	0.0734706	0.0175224	0.137714	0.076988	0.11008	0.00019935	9.01e-05	0.0593575
BOYLAN_MULTIPLE_MYELOMA_C_UP	0.04068	-0.0581178	0.0309209	0.0428594	-0.0053254	0.934405	0.0410525	-0.132939	0.00032314	0.00074363	-0.0654607
BOYLAN_MULTIPLE_MYELOMA_D_CLUSTER_DN	0.0841811	0.106313	1.06e-09	0.089735	0.195119	1.81e-17	0.0847497	0.120903	1.39e-09	8.67e-32	0.140778
BOYLAN_MULTIPLE_MYELOMA_D_CLUSTER_UP	0.0688102	0.10404	2.74e-05	0.0682719	0.182929	6.32e-09	0.0699292	0.150478	2.2e-07	3.97e-17	0.145815
BOYLAN_MULTIPLE_MYELOMA_D_DN	0.080747	0.0983213	2.02e-11	0.0753127	-0.0182887	0.473193	0.0753612	0.0925978	5.64e-07	4.47e-15	0.0575435
BOYLAN_MULTIPLE_MYELOMA_D_UP	0.0484149	-0.0071212	0.618562	0.0505798	0.0817898	0.00685696	0.0511547	0.0345618	0.30072	0.038101	0.0364101
BOYLAN_MULTIPLE_MYELOMA_PCA1_UP	0.0304513	0.193192	8.38e-18	0.0292671	0.1051	0.00115644	0.0297327	0.17752	7.52e-12	1.93e-28	0.158604
BOYLAN_MULTIPLE_MYELOMA_PCA3_DN	0.0371076	0.0603264	0.021439	0.0409041	0.113497	0.0001479	0.0389534	0.0749812	0.00584088	3.28e-06	0.0829349
BOYLAN_MULTIPLE_MYELOMA_PCA3_UP	0.0425838	0.0470471	0.0245094	0.0459598	0.169199	1.61e-09	0.0473437	0.0645455	0.0130569	2.21e-10	0.0935972
BRACHAT_RESPONSE_TO_CAMPTOTHECIN_DN	0.28193	-0.0154736	0.0163483	0.275989	-0.0326818	0.0406298	0.27287	-0.0294108	0.00285597	0.00019154	-0.0258554
BRACHAT_RESPONSE_TO_CAMPTOTHECIN_UP	0.030864	0.0796219	0.0565344	0.0317847	0.122028	0.132306	0.0294759	-0.0199663	0.950217	0.129221	0.0605613
BRACHAT_RESPONSE_TO_CISPLATIN	0.0280833	0.0412844	0.0249927	0.0270545	0.00505349	0.521123	0.0277049	0.0882327	0.00702978	0.00490107	0.0448569
BRACHAT_RESPONSE_TO_METHOTREXATE_DN	0.266255	-0.0292147	0.0344352	0.261753	-0.0348757	0.219867	0.2567	-0.0423742	0.0064531	0.002941	-0.0354882
BRACHAT_RESPONSE_TO_METHOTREXATE_UP	0.0357639	0.0738559	0.00192209	0.0358865	0.0718691	0.0345003	0.0378893	0.201789	0.00081656	8.54e-06	0.115838
BREDEMEYER_RAG_SIGNALING_NOT_VIA_ATM_DN	0.029033	-0.0248826	0.757954	0.0265843	-0.104385	0.0177107	0.0274475	-0.108403	0.00182429	0.00166478	-0.0792235
BREDEMEYER_RAG_SIGNALING_NOT_VIA_ATM_UP	0.0265374	-0.0562022	0.00816461	0.0276567	-0.0753917	0.0172562	0.0295503	0.0540568	0.0847495	0.00091443	-0.0258457
BREDEMEYER_RAG_SIGNALING_VIA_ATM_NOT_VIA_NFKB_DN	0.051593	0.0277449	0.137043	0.0483278	-0.0350582	0.588969	0.0481693	-0.0300672	0.319337	0.292548	-0.0124602
BREDEMEYER_RAG_SIGNALING_VIA_ATM_NOT_VIA_NFKB_UP	0.0502024	0.0141101	0.290762	0.0493571	0.082569	0.0272594	0.0523275	0.105781	4.73e-05	4.69e-05	0.0674866
BRIDEAU_IMPRINTED_GENES	0.0337706	0.0812142	4.9e-05	0.0327304	0.106645	0.00202356	0.03118	0.0575402	0.0125616	2.89e-07	0.0817999
BROCKE_APOPTOSIS_REVERSED_BY_IL6	0.0768566	-0.0325696	0.0336293	0.0784403	-0.0220572	0.279419	0.0766855	0.0214253	0.354258	0.0764947	-0.0110672
BROWN_MYELOID_CELL_DEVELOPMENT_DN	0.135016	-0.0580038	1.96e-06	0.133332	-0.0015692	0.580534	0.132509	-0.104539	9.02e-10	6.47e-13	-0.0547038
BROWN_MYELOID_CELL_DEVELOPMENT_UP	0.0754417	9.56e-08	0.613821	0.0786619	0.00776784	0.595067	0.0781941	0.0311726	0.0483862	0.232923	0.0129802
BROWNE_HCMV_INFECTION_10HR_DN	0.0773915	-0.0135253	0.456781	0.0803833	-0.0224475	0.226732	0.0806415	0.0410612	0.0690681	0.12978	0.00169611
BROWNE_HCMV_INFECTION_10HR_UP	0.0563335	0.0110518	0.541673	0.0541926	-0.0117367	0.211384	0.0553461	0.0112497	0.118185	0.19702	0.0035216
BROWNE_HCMV_INFECTION_12HR_DN	0.0426558	-0.0371036	0.028862	0.0466234	0.00178398	0.954815	0.04522	0.00961737	0.903565	0.286641	-0.0085674
BROWNE_HCMV_INFECTION_12HR_UP	0.030868	0.0501669	0.00795027	0.0314413	0.0561487	0.0919284	0.0328517	0.0654126	0.00028945	2.84e-05	0.0572427
BROWNE_HCMV_INFECTION_14HR_DN	0.0536946	-0.0302797	0.0014577	0.0554395	-0.0471626	3.91e-07	0.054328	-0.0304056	0.00966121	2e-09	-0.0359493
BROWNE_HCMV_INFECTION_14HR_UP	0.0588407	-0.0511318	0.00397944	0.0598969	-0.0098665	0.907851	0.0610129	-0.060652	0.00228999	0.00067159	-0.0405501
BROWNE_HCMV_INFECTION_16HR_DN	0.0769954	-0.0318556	0.0221332	0.0767178	-0.0317009	0.428764	0.0750183	-0.0179624	0.174768	0.0462624	-0.027173
BROWNE_HCMV_INFECTION_16HR_UP	0.029475	0.0186968	0.568999	0.0311058	-0.013012	0.817387	0.0333153	-0.0176284	0.654986	0.881937	-0.0039812
BROWNE_HCMV_INFECTION_18HR_DN	0.0631153	0.0550766	6.66e-05	0.0620704	0.03999	0.00480654	0.0618464	0.107824	4.85e-11	1.22e-14	0.06763
BROWNE_HCMV_INFECTION_18HR_UP	0.0516129	-0.0194231	0.0559367	0.0526708	-0.0008067	0.531029	0.0535275	-0.0265479	0.17491	0.104397	-0.0155925
BROWNE_HCMV_INFECTION_1HR_DN	0.0318718	-0.0295178	0.0426402	0.0349542	0.0319108	0.367173	0.0338375	-0.0037713	0.897909	0.201842	-0.0004595
BROWNE_HCMV_INFECTION_1HR_UP	0.0293225	0.109238	0.00204336	0.0271511	-0.0313643	0.724159	0.0261814	0.0553964	0.16984	0.0109676	0.0444235
BROWNE_HCMV_INFECTION_20HR_DN	0.0521636	0.0162702	0.399867	0.0560816	0.0506802	0.152468	0.0541037	0.0446747	0.0390734	0.0602191	0.0372083
BROWNE_HCMV_INFECTION_20HR_UP	0.0380357	0.00846408	0.376815	0.0378167	-0.0128766	0.745729	0.0403454	0.0130664	0.226142	0.480011	0.00288461
BROWNE_HCMV_INFECTION_24HR_DN	0.102212	0.0325086	0.00125854	0.102306	0.0330906	0.0326061	0.0999349	0.0302104	0.00301604	1.77e-05	0.0319365
BROWNE_HCMV_INFECTION_24HR_UP	0.054413	-0.0478067	0.00553375	0.0553428	0.0148159	0.468903	0.054107	-0.047847	0.00047096	0.00013112	-0.0269459
BROWNE_HCMV_INFECTION_2HR_DN	0.0858773	0.00293214	0.927759	0.0844191	0.0149757	0.959849	0.0799651	-0.108487	0.00794656	0.128842	-0.0301931
BROWNE_HCMV_INFECTION_2HR_UP	0.0781382	0.0225791	0.454217	0.0777032	-0.0583156	0.687734	0.0798324	0.100215	0.00223085	0.0241727	0.021493
BROWNE_HCMV_INFECTION_30MIN_DN	0.0249187	-0.0464079	0.129924	0.0255561	-0.0122616	0.942318	0.0262684	-0.0382377	0.53691	0.488215	-0.0323024
BROWNE_HCMV_INFECTION_30MIN_UP	0.079178	0.16298	2.22e-09	0.081504	0.182956	1.06e-06	0.0772846	0.20663	8.46e-10	3.06e-21	0.184189
BROWNE_HCMV_INFECTION_48HR_DN	0.0784338	0.0584902	2.6e-10	0.0787116	0.0409296	0.00023916	0.0792849	0.0763353	2.35e-14	2.88e-24	0.058585
BROWNE_HCMV_INFECTION_48HR_UP	0.0426235	-0.0352395	0.0366193	0.0434666	-0.0137809	0.45196	0.0437191	-0.0352865	0.0297117	0.0185048	-0.0281023
BROWNE_HCMV_INFECTION_4HR_DN	0.0367925	-0.0079801	0.780526	0.0384762	0.0188708	0.637274	0.0384524	0.0427401	0.0189625	0.155992	0.0178769
BROWNE_HCMV_INFECTION_4HR_UP	0.0456895	0.0502423	0.209571	0.0444498	0.16533	0.00471713	0.0466699	0.0729463	0.00184976	0.00018559	0.096173
BROWNE_HCMV_INFECTION_6HR_DN	0.0201808	-0.0646452	0.00934797	0.0233135	-0.0656399	0.0262815	0.0228751	-0.0214178	0.34143	0.00456616	-0.0505676
BROWNE_HCMV_INFECTION_6HR_UP	0.0394569	-0.0156853	0.716619	0.0390985	-0.0004483	0.744024	0.0390013	-0.050781	0.169013	0.567966	-0.0223048
BROWNE_HCMV_INFECTION_8HR_DN	0.0395514	-0.0129275	0.667025	0.0416518	0.036842	0.543343	0.0385814	0.0340109	0.873152	0.890022	0.0193085
BROWNE_HCMV_INFECTION_8HR_UP	0.0657451	-0.0106623	0.288962	0.0657178	0.0139424	0.623688	0.0681056	0.00712517	0.55272	0.594324	0.00346842
BROWNE_INTERFERON_RESPONSIVE_GENES	0.0263319	-0.0301229	0.6841	0.0307997	0.0762564	0.532101	0.0344977	0.119274	0.0193025	0.128226	0.0551358
BRUECKNER_TARGETS_OF_MIRLET7A3_DN	0.16405	0.0419579	9.24e-07	0.161589	0.0541578	4.32e-06	0.162673	0.0636138	1.9e-07	6.92e-16	0.0532432
BRUECKNER_TARGETS_OF_MIRLET7A3_UP	0.0554801	-0.0378492	0.00643198	0.0582346	-0.0668596	0.00193423	0.0600644	-0.0284864	0.138954	0.00017683	-0.0443984
BRUINS_UVC_RESPONSE_EARLY_LATE	0.0626851	-0.0241484	0.00664534	0.0627994	-0.0365868	0.00018998	0.0639663	-0.0347304	0.00113451	3.28e-07	-0.0318219
BRUINS_UVC_RESPONSE_LATE	0.108196	0.00543118	0.053821	0.107837	0.00849081	0.086218	0.107555	0.00263952	0.878227	0.0882024	0.0055205
BRUINS_UVC_RESPONSE_MIDDLE	0.0206758	-0.190817	1.15e-06	0.0229471	-0.188652	2.24e-05	0.0243083	-0.112164	0.00257121	3.26e-11	-0.163878
BRUINS_UVC_RESPONSE_VIA_TP53_GROUP_A	0.0370796	0.0232461	0.0412126	0.0386182	0.0524169	0.00043531	0.0379442	0.0552148	1.7e-06	9.71e-09	0.0436259
BRUINS_UVC_RESPONSE_VIA_TP53_GROUP_B	0.058943	0.0253216	0.0395842	0.0601581	0.023672	0.190109	0.0601125	0.0660728	0.00029445	0.00021888	0.0383554
BRUINS_UVC_RESPONSE_VIA_TP53_GROUP_C	0.0349549	-0.139001	1.95e-16	0.0361237	-0.125823	5.14e-06	0.0342488	-0.148594	1.92e-07	4.03e-25	-0.137806
BRUINS_UVC_RESPONSE_VIA_TP53_GROUP_D	0.0397522	-0.0048282	0.774265	0.0411742	0.00936917	0.30491	0.0419536	-0.0109798	0.515874	0.648154	-0.0021463
BRUNO_HEMATOPOIESIS	0.126695	0.0454484	0.00083155	0.126457	0.0196804	0.139035	0.126309	0.0562883	0.00013875	2.89e-06	0.0404724
BUFFA_HYPOXIA_METAGENE	0.259447	-0.0570569	1.92e-06	0.269495	-0.0406057	0.111702	0.262464	-0.0636367	1.78e-06	1.67e-10	-0.0537664
BURTON_ADIPOGENESIS_1	0.0939577	-0.0050748	0.955237	0.0915218	-0.0836421	0.169652	0.0971148	0.147657	0.0124765	0.0534731	0.0196468
BURTON_ADIPOGENESIS_10	0.0578189	-0.14732	2.93e-06	0.0620854	-0.0525725	0.662943	0.0605535	-0.0605457	0.0666471	1.84e-05	-0.0868128
BURTON_ADIPOGENESIS_11	0.0583423	0.0852344	0.00010016	0.061481	0.0635118	0.0781019	0.0596513	0.0909525	0.00154367	2.24e-06	0.0798996
BURTON_ADIPOGENESIS_12	0.0573627	-0.120721	0.00115062	0.0579058	-0.169706	2.31e-05	0.0639294	-0.11311	0.00374679	2.88e-08	-0.134512
BURTON_ADIPOGENESIS_2	0.119982	0.0272732	0.00138073	0.121395	0.112311	1.54e-10	0.119216	0.047979	5.08e-05	8.68e-15	0.0625211
BURTON_ADIPOGENESIS_3	0.0596679	-0.132459	0.190785	0.0576503	0.00070145	0.993869	0.0556641	-0.448953	0.00058881	0.00575061	-0.19357
BURTON_ADIPOGENESIS_4	0.157611	0.0194759	0.0811869	0.144325	-0.0174572	0.425453	0.141847	-0.0666313	0.0008744	0.0019803	-0.0215375
BURTON_ADIPOGENESIS_5	0.166172	0.0266702	0.0148029	0.158044	0.0647961	0.00161823	0.152331	-0.0050151	0.648615	0.00113997	0.0288171
BURTON_ADIPOGENESIS_6	0.104204	-0.0056376	0.748606	0.107254	0.0359871	0.0654766	0.101108	0.00853491	0.149462	0.131879	0.0129615
BURTON_ADIPOGENESIS_7	0.181765	0.0748767	3.39e-13	0.173554	0.0572618	0.00082597	0.169047	0.0564411	2.11e-05	6.7e-18	0.0628599
BURTON_ADIPOGENESIS_8	0.157982	0.0235989	0.0210614	0.157853	-0.0005912	0.897411	0.15616	0.0210983	0.121788	0.0587461	0.014702
BURTON_ADIPOGENESIS_9	0.0928201	0.012043	0.0722919	0.0954917	0.0266595	0.0733585	0.0926818	0.0386993	0.00319953	0.00122695	0.0258006
BURTON_ADIPOGENESIS_PEAK_AT_0HR	0.0870082	0.058054	0.00015953	0.0905062	0.118549	1.86e-08	0.0903128	0.0786403	1.19e-05	2.66e-14	0.0850811
BURTON_ADIPOGENESIS_PEAK_AT_16HR	0.0809224	-0.0264254	0.876793	0.08052	0.0158689	0.932047	0.0811199	-0.112576	0.0230853	0.24247	-0.0410441
BURTON_ADIPOGENESIS_PEAK_AT_24HR	0.0654656	-0.107316	0.0317605	0.0648888	0	0.662651	0.0578571	-0.406978	5.87e-06	1.77e-05	-0.171431
BURTON_ADIPOGENESIS_PEAK_AT_2HR	0.154528	0.0377066	0.0481104	0.161067	0.0648322	0.424437	0.157495	0.121678	7.68e-05	0.00016259	0.0747388
BURTON_ADIPOGENESIS_PEAK_AT_8HR	0.118591	-0.0316129	0.00272038	0.114356	-0.0561886	0.0112996	0.114605	-0.0004175	0.618202	0.00134845	-0.0294063
BUYTAERT_PHOTODYNAMIC_THERAPY_STRESS_DN	0.0656625	0.0126032	0.0780288	0.0641209	-0.007372	0.951423	0.0639917	-0.0162513	0.433806	0.332917	-0.0036734
BUYTAERT_PHOTODYNAMIC_THERAPY_STRESS_UP	0.0766792	-0.0288513	0.372396	0.0797499	-0.0283661	0.375532	0.0817482	0.017731	0.471557	0.489	-0.0131621
BYSTROEM_CORRELATED_WITH_IL5_DN	0.0656927	-0.046531	0.104885	0.0659511	-0.0417124	0.230966	0.0640098	-0.049467	0.0555606	0.039653	-0.0459035
BYSTROEM_CORRELATED_WITH_IL5_UP	0.0919196	0.00663152	0.0824462	0.0938942	0.0651998	0.0103992	0.0947262	0.00932251	0.763355	0.0230431	0.0270513
BYSTRYKH_HEMATOPOIESIS_STEM_CELL_AND_BRAIN_QTL_CIS	0.140139	0.0770827	8.68e-22	0.137419	0.0816872	1.32e-09	0.139457	0.105081	6.03e-20	4.52e-46	0.0879503
BYSTRYKH_HEMATOPOIESIS_STEM_CELL_AND_BRAIN_QTL_TRANS	0.0922903	-0.0217627	0.00168435	0.088583	-0.0286568	0.0143929	0.0887544	-0.0372736	8.66e-05	4.63e-07	-0.029231
BYSTRYKH_HEMATOPOIESIS_STEM_CELL_QTL_CIS	0.109518	0.0381105	1.96e-08	0.108665	0.0461142	1.54e-05	0.107764	0.0573017	1.46e-08	5.05e-18	0.0471755
BYSTRYKH_HEMATOPOIESIS_STEM_CELL_QTL_TRANS	0.0882604	0.0194931	1.84e-07	0.0880671	0.0337132	4.17e-09	0.0880977	0.0147349	0.00262426	1.75e-15	0.022647
CADWELL_ATG16L1_TARGETS_DN	0.0338687	0.0870525	0.0145384	0.0404491	0.378512	3.59e-14	0.0406383	0.20238	1.28e-06	8.26e-19	0.222648
CADWELL_ATG16L1_TARGETS_UP	0.0132355	-0.0313098	0.428613	0.0147716	0.122619	0.351585	0.0146538	0.0678642	0.323022	0.418159	0.0530578
CAFFAREL_RESPONSE_TO_THC_24HR_5_DN	0.199577	-0.020872	0.254356	0.196575	0.00741838	0.982852	0.188827	-0.0593792	0.00098031	0.0107525	-0.0242776
CAFFAREL_RESPONSE_TO_THC_24HR_5_UP	0.204045	-0.041878	0.00020447	0.20756	0.00238899	0.827035	0.194201	-0.0515382	5.82e-06	2.33e-07	-0.0303424
CAFFAREL_RESPONSE_TO_THC_DN	0.178148	0.00210871	0.976047	0.174128	0.00805584	0.954815	0.170983	-0.0274731	0.0741935	0.500616	-0.0057695
CAFFAREL_RESPONSE_TO_THC_UP	0.110814	-0.0060853	0.798452	0.10827	-0.0117609	0.47295	0.116701	0.0192223	0.552169	0.791659	0.00045872
CAIRO_HEPATOBLASTOMA_CLASSES_DN	0.0547576	0.0177869	0.285921	0.0548138	0.00285801	0.913225	0.0542614	0.0661759	0.0001707	0.00272785	0.0289403
CAIRO_HEPATOBLASTOMA_CLASSES_UP	0.218441	-0.0450044	1.2e-06	0.21765	-0.0141367	0.290352	0.212331	-0.0824884	7.19e-11	1.93e-14	-0.0472098
CAIRO_HEPATOBLASTOMA_DN	0.0258554	-0.0232733	0.463452	0.0276751	0.045883	0.254178	0.0264137	0.0419832	0.0560306	0.122925	0.021531
CAIRO_HEPATOBLASTOMA_UP	0.0819585	0.0179339	0.00861142	0.0816339	0.0122771	0.45196	0.0818078	0.00245541	0.764015	0.0705999	0.0108888
CAIRO_LIVER_DEVELOPMENT_DN	0.0203096	0.0464024	0.17491	0.0196828	-0.101203	0.0265063	0.0202413	0.0728254	0.0170118	0.00434397	0.00600812
CAIRO_LIVER_DEVELOPMENT_UP	0.0887339	0.0778917	6.15e-20	0.0889597	0.119457	8.17e-21	0.0884418	0.0888048	1.79e-13	6.55e-49	0.0953844
CAIRO_PML_TARGETS_BOUND_BY_MYC_UP	0.24963	0.00224	0.98319	0.247154	0.0148195	0.369757	0.24281	-0.058237	0.00020127	0.00408749	-0.0137258
CAMPS_COLON_CANCER_COPY_NUMBER_DN	0.0702385	0.0752604	3.97e-06	0.0717831	0.0539196	0.133161	0.0734415	0.088458	0.00310232	3.7e-07	0.072546
CAMPS_COLON_CANCER_COPY_NUMBER_UP	0.0941063	0.0600549	2.5e-09	0.0933945	0.106846	1.97e-14	0.0899279	0.0524709	0.00025301	2.3e-23	0.0731241
CARD_MIR302A_TARGETS	0.0926393	-0.019761	0.155048	0.0910778	-0.0836218	0.00013881	0.0927053	-0.0406858	0.00130015	4.75e-06	-0.0480229
CASORELLI_ACUTE_PROMYELOCYTIC_LEUKEMIA_DN	0.155705	-0.0146924	0.141143	0.152472	0.00248498	0.982852	0.150007	-0.0671985	3.55e-06	5.96e-05	-0.0264686
CASORELLI_ACUTE_PROMYELOCYTIC_LEUKEMIA_UP	0.106945	0.0141418	0.544165	0.10834	0.0111824	0.552067	0.107277	0.0800045	4.31e-05	0.00097879	0.0351096
CASORELLI_APL_SECONDARY_VS_DE_NOVO_UP	0.103024	0.0580866	0.0011319	0.101322	0.0184555	0.942581	0.0991792	0.0429967	0.112345	0.00608803	0.0398463
CASTELLANO_NRAS_TARGETS_UP	0.0586748	0.0585568	0.00535224	0.0626125	0.138641	0.00037353	0.0615484	0.101706	4.96e-05	2.87e-08	0.0996347
CEBALLOS_TARGETS_OF_TP53_AND_MYC_DN	0.113713	0.0987102	1.41e-07	0.0973566	0.00338084	0.813198	0.0964577	-0.0130067	0.961355	1.6e-05	0.0296948
CERIBELLI_GENES_INACTIVE_AND_BOUND_BY_NFY	0	NA	0.00436851	0	NA	0.195196	0	NA	0.379169	0.0133638	NA
CERVERA_SDHB_TARGETS_1_DN	0.0264602	0.523562	2.97e-09	0.0256932	0.523355	5.93e-08	0.029056	0.579845	9.12e-13	3.39e-25	0.542254
CERVERA_SDHB_TARGETS_1_UP	0.0430964	0.020682	0.650964	0.0478237	0.04639	0.474118	0.044382	0.0630887	0.0467223	0.205115	0.0433869
CERVERA_SDHB_TARGETS_2	0.0209809	0.159103	7.56e-08	0.0245641	0.286694	1.11e-11	0.0241138	0.259462	5.24e-13	1.1e-27	0.235087
CHANDRAN_METASTASIS_DN	0.0480088	0.0131781	0.141832	0.0486205	-0.0274048	0.242465	0.0491305	0.0646925	1.12e-05	4.82e-05	0.0168219
CHANDRAN_METASTASIS_TOP50_DN	0.156403	0.0775508	6.35e-13	0.147064	0.036402	0.00293106	0.145147	0.0650117	0.00010959	1.98e-16	0.0596548
CHANDRAN_METASTASIS_TOP50_UP	0.194289	-0.0412861	0.0001698	0.188034	-0.0959868	4.31e-08	0.186213	-0.0760147	9.34e-07	5.61e-15	-0.0710959
CHANDRAN_METASTASIS_UP	0.0888457	-0.0053678	0.588493	0.0884925	-0.0483503	0.00730054	0.0907622	-0.0306954	0.0334527	0.0070407	-0.0281378
CHANG_IMMORTALIZED_BY_HPV31_DN	0.0880754	0.0412568	0.0232078	0.0890701	0.0318345	0.259539	0.0900497	0.0440976	0.0261997	0.00758613	0.039063
CHANG_IMMORTALIZED_BY_HPV31_UP	0.0325497	-0.117837	4.28e-08	0.0331693	-0.229622	1.39e-13	0.0348217	-0.132644	4.88e-05	4.81e-22	-0.160034
CHANGOLKAR_H2AFY_TARGETS_DN	0.0463458	-0.119385	4.75e-09	0.0469032	-0.106535	0.0186633	0.0464227	-0.152899	8.16e-07	5.27e-14	-0.126273
CHANGOLKAR_H2AFY_TARGETS_UP	0.0507535	0.0698366	6.45e-05	0.0500891	0.0752048	0.00099697	0.0497974	0.0786287	0.00750083	1.22e-07	0.0745567
CHARAFE_BREAST_CANCER_BASAL_VS_MESENCHYMAL_DN	0.0243683	0.00183767	0.884373	0.0261211	-0.0488526	0.881539	0.0256402	0.180107	0.0353029	0.304032	0.044364
CHARAFE_BREAST_CANCER_BASAL_VS_MESENCHYMAL_UP	0.0370389	0.0158856	0.301072	0.0367833	0.0115426	0.364174	0.0374684	0.0703239	0.00067437	0.00412242	0.032584
CHARAFE_BREAST_CANCER_LUMINAL_VS_BASAL_DN	0.0888697	0.0117463	0.258095	0.0936478	0.0591707	0.00042604	0.091462	0.0417547	1.4e-05	3.51e-07	0.0375572
CHARAFE_BREAST_CANCER_LUMINAL_VS_BASAL_UP	0.0444969	0.0212655	0.0166615	0.0447038	0.0253293	0.297554	0.0443253	0.00467428	0.394134	0.0521588	0.0170897
CHARAFE_BREAST_CANCER_LUMINAL_VS_MESENCHYMAL_DN	0.0896848	0.00601229	0.44011	0.091402	0.0128045	0.401919	0.0893286	0.0229785	0.0134501	0.0601642	0.0139318
CHARAFE_BREAST_CANCER_LUMINAL_VS_MESENCHYMAL_UP	0.0291616	0.0708913	7.85e-08	0.0274769	0.00505674	0.483691	0.0278081	0.0663439	0.00010748	1.52e-09	0.0474306
CHAUHAN_RESPONSE_TO_METHOXYESTRADIOL_DN	0.304188	0.0295415	4.98e-11	0.296171	0.0153584	0.0028794	0.293306	0.0281287	4.27e-05	5.05e-15	0.0243429
CHAUHAN_RESPONSE_TO_METHOXYESTRADIOL_UP	0.25322	-0.0248579	0.00954995	0.244526	-0.0019551	0.649312	0.241062	-0.070942	2.69e-06	2.99e-06	-0.032585
CHEBOTAEV_GR_TARGETS_DN	0.0282921	0.197862	1.53e-13	0.0281077	0.164788	7.68e-09	0.0287061	0.17375	2.22e-09	6.24e-27	0.1788
CHEBOTAEV_GR_TARGETS_UP	0.01779	0.0977411	0.0146687	0.017885	0.239982	2.24e-05	0.0182251	0.0999881	0.0418607	2.51e-06	0.145904
CHEMNITZ_RESPONSE_TO_PROSTAGLANDIN_E2_DN	0.0337413	0.0437098	3.02e-05	0.0335414	0.0436506	0.00055132	0.0348592	0.0648552	4.17e-05	2.92e-10	0.0507386
CHEMNITZ_RESPONSE_TO_PROSTAGLANDIN_E2_UP	0.0756739	-0.0470923	0.0378211	0.0742391	-0.0424303	0.237897	0.0741581	-0.188785	1.71e-06	2.78e-06	-0.0927692
CHEN_ETV5_TARGETS_SERTOLI	0.0241302	-0.0255084	0.894354	0.0192181	-0.356856	2.57e-08	0.0194333	-0.160811	0.0126859	7.7e-08	-0.181059
CHEN_HOXA5_TARGETS_9HR_DN	0.0681648	0.0391413	0.104232	0.0665895	0.0756048	0.0855822	0.0624866	0.0250803	0.476155	0.09079	0.0466088
CHEN_HOXA5_TARGETS_9HR_UP	0.074263	-0.0535647	0.00125946	0.0737057	-0.128992	8.15e-06	0.0777473	-0.0090295	0.186695	4.26e-07	-0.0638621
CHEN_LIVER_METABOLISM_QTL_CIS	0.0581458	-0.0005402	0.497617	0.0604326	0.0400657	0.228038	0.0589211	0.0350854	0.0551768	0.118606	0.0248703
CHEN_LUNG_CANCER_SURVIVAL	0.35018	0.0663892	6.1e-28	0.332759	0.0511751	2.63e-08	0.328632	0.0585279	1.12e-09	9.29e-41	0.0586974
CHEN_LVAD_SUPPORT_OF_FAILING_HEART_DN	0.0369413	0.0453084	0.0879691	0.037166	0.052548	0.0194314	0.0384673	0.10295	0.00018204	3.99e-05	0.0669356
CHEN_LVAD_SUPPORT_OF_FAILING_HEART_UP	0.0801425	-0.0456064	0.414847	0.0897768	0.0598758	0.0377415	0.0894381	0.0958586	0.0010751	0.0012188	0.0367093
CHEN_METABOLIC_SYNDROM_NETWORK	0.0856274	0.0250613	0.00015259	0.0871763	0.0345018	8.45e-06	0.085574	0.0401377	4.04e-07	3.42e-13	0.0332336
CHEN_NEUROBLASTOMA_COPY_NUMBER_GAINS	0.0889818	-0.003747	0.437715	0.0895158	0.0283912	0.862856	0.0889373	-0.0478506	0.0240467	0.152154	-0.0077354
CHENG_IMPRINTED_BY_ESTRADIOL	0.0322096	0.0528292	0.00548007	0.0320911	-0.0258846	0.717106	0.0334098	0.0639502	0.0180836	0.00399182	0.0302982
CHENG_RESPONSE_TO_NICKEL_ACETATE	0.099927	-0.0296	0.186861	0.0975089	-0.0185119	0.973628	0.0988868	-0.0104789	0.990438	0.753596	-0.0195302
CHEOK_RESPONSE_TO_HD_MTX_DN	0.0612117	-0.0421991	0.33271	0.0648616	0.0561544	0.296125	0.0626427	0.058184	0.562905	0.447793	0.0240464
CHEOK_RESPONSE_TO_MERCAPTOPURINE_AND_HD_MTX_DN	0.0559887	0.0792431	0.0222506	0.0455941	0.0192306	0.559146	0.0492558	-0.0026884	0.882349	0.172244	0.0319284
CHESLER_BRAIN_HIGHEST_EXPRESSION	0.288019	0.0353694	4.47e-09	0.280577	0.0511185	5.59e-07	0.279866	0.0276904	0.00526326	1.05e-14	0.0380594
CHESLER_BRAIN_HIGHEST_GENETIC_VARIANCE	0.0851659	0.0401164	0.00164114	0.0852332	0.0768462	7.07e-06	0.0842336	0.0495683	0.00011522	5.37e-10	0.0555103
CHESLER_BRAIN_QTL_CIS	0.111418	0.0883786	4.5e-20	0.108753	0.136298	4.12e-19	0.110117	0.0981806	2.62e-14	3.44e-48	0.107619
CHIANG_LIVER_CANCER_SUBCLASS_CTNNB1_DN	0.0419384	0.0360147	0.00254807	0.0464031	0.119738	1.4e-05	0.0440796	0.119924	2.07e-11	6.73e-16	0.0918921
CHIANG_LIVER_CANCER_SUBCLASS_CTNNB1_UP	0.0116706	0.153654	0.00067052	0.0126805	0.138063	0.00826345	0.0123475	0.134955	0.00125509	1.36e-06	0.142224
CHIANG_LIVER_CANCER_SUBCLASS_INTERFERON_DN	0	NA	0.245303	0.00017825	-2.71049	0.10327	0.00078593	4.01495	0.354292	0.150969	NA
CHIANG_LIVER_CANCER_SUBCLASS_POLYSOMY7_DN	0.0257092	-0.315338	3.14e-12	0.0292924	-0.274175	0.00012869	0.0284613	-0.206221	5.17e-05	2.24e-17	-0.265245
CHIANG_LIVER_CANCER_SUBCLASS_POLYSOMY7_UP	0.00886605	-0.0554241	0.32125	0.00754656	-0.300528	0.00496621	0.010064	0.0898504	0.512015	0.0272722	-0.0887006
CHIANG_LIVER_CANCER_SUBCLASS_PROLIFERATION_DN	0.0152212	0.0694498	0.00411885	0.0154436	0.0867962	0.157333	0.0154496	0.171469	0.00075557	5.93e-05	0.109238
CHIANG_LIVER_CANCER_SUBCLASS_PROLIFERATION_UP	0.0552028	-0.0345303	0.402048	0.0565005	-0.0143931	0.688164	0.055385	-0.152792	3.96e-05	0.00085114	-0.0672385
CHIANG_LIVER_CANCER_SUBCLASS_UNANNOTATED_DN	0.197782	-0.017111	0.0531102	0.188378	-0.015518	0.434967	0.185097	-0.0447053	1.07e-06	4.23e-06	-0.0257781
CHIANG_LIVER_CANCER_SUBCLASS_UNANNOTATED_UP	0.0650932	-0.0465724	0.055045	0.0651883	-0.128885	8.42e-05	0.0681441	0.0248849	0.386822	0.00018242	-0.0501907
CHIARADONNA_NEOPLASTIC_TRANSFORMATION_CDC25_DN	0.125337	0.0507983	2.78e-05	0.124137	0.0646786	0.00221817	0.121535	0.0691505	1.57e-05	3.99e-10	0.0615425
CHIARADONNA_NEOPLASTIC_TRANSFORMATION_CDC25_UP	0.110764	0.0589804	1.14e-11	0.110565	0.0801205	8.1e-11	0.109188	0.0453702	0.00010406	1.65e-22	0.0614903
CHIARADONNA_NEOPLASTIC_TRANSFORMATION_KRAS_CDC25_DN	0.0815306	0.160541	2.94e-15	0.0833674	0.234213	3.86e-17	0.0808674	0.126158	8.92e-09	4.17e-36	0.173637
CHIARADONNA_NEOPLASTIC_TRANSFORMATION_KRAS_CDC25_UP	0.202474	0.0499933	1.12e-05	0.197024	0.0797002	2.9e-12	0.19752	0.0612088	3.05e-07	1.44e-20	0.0636341
CHIARADONNA_NEOPLASTIC_TRANSFORMATION_KRAS_DN	0.0652841	0.0501228	0.013083	0.0682884	0.0664285	0.159784	0.0658613	0.0842378	0.0008556	0.00018209	0.0669297
CHIARADONNA_NEOPLASTIC_TRANSFORMATION_KRAS_UP	0.127368	-0.0068597	0.87583	0.124134	0.0214905	0.417834	0.121711	-0.0703481	0.0501313	0.238343	-0.0185724
CHIARETTI_ACUTE_LYMPHOBLASTIC_LEUKEMIA_ZAP70	0.0137479	-0.0360173	0.467235	0.0174227	0.148965	0.0800297	0.0174854	0.0521711	0.372345	0.200612	0.0550397
CHIARETTI_T_ALL_REFRACTORY_TO_THERAPY	0.0847198	0.123705	1.54e-06	0.0720649	-0.0521931	0.812566	0.0808407	0.140033	0.00040476	1.28e-07	0.070515
CHIBA_RESPONSE_TO_TSA	0.186288	0.025538	0.357982	0.189102	0.0545059	0.0107591	0.187483	0.0694247	0.00043876	0.00017341	0.0498228
CHIBA_RESPONSE_TO_TSA_UP	0.139738	0.0662115	1.57e-07	0.135816	0.0492996	0.00199901	0.132806	0.0454439	0.00076435	1.09e-10	0.0536517
CHICAS_RB1_TARGETS_CONFLUENT	0.102162	0.0353824	1.5e-06	0.103115	0.0610916	3.94e-08	0.100618	0.0378907	2.11e-06	1.23e-16	0.0447883
CHICAS_RB1_TARGETS_GROWING	0.0760446	-0.0456415	0.138241	0.0778464	0.021093	0.717387	0.0761022	-0.143353	5.37e-05	0.00046265	-0.0559672
CHICAS_RB1_TARGETS_LOW_SERUM	0.246527	0.00061909	0.906792	0.250728	0.00659766	0.706562	0.238202	-0.006854	0.672345	0.946324	0.00012092
CHICAS_RB1_TARGETS_SENESCENT	0.0871502	-0.0001704	0.873461	0.0864962	0.0110065	0.566081	0.0875209	-0.0191402	0.0610901	0.3209	-0.002768
CHIN_BREAST_CANCER_COPY_NUMBER_UP	0.080236	-0.0729128	0.0325356	0.0847788	-0.0268555	0.30491	0.0864749	-0.0552769	0.0739501	0.0251366	-0.0516817
CHNG_MULTIPLE_MYELOMA_HYPERPLOID_DN	0.10413	0.0472474	0.00322432	0.099762	0.0774737	0.00036337	0.100294	0.0655719	0.00121508	3.26e-07	0.063431
CHNG_MULTIPLE_MYELOMA_HYPERPLOID_UP	0.585813	-0.0078774	0.00129534	0.584594	-0.0062858	0.0908647	0.579655	-0.0100724	0.00047961	8.86e-06	-0.0080785
CHO_NR4A1_TARGETS	0.0475515	-0.0468595	0.136107	0.0495265	0.0298088	0.443497	0.0546285	-0.0036731	0.906504	0.444683	-0.0069079
CHOI_ATL_STAGE_PREDICTOR	0.219868	-0.0483658	1.01e-08	0.219008	-0.0348229	0.00078343	0.215126	-0.0788331	2e-11	2.08e-19	-0.0540072
CHOW_RASSF1_TARGETS_DN	0.195118	0.0539796	3.3e-07	0.187623	0.0702138	0.00091243	0.190788	0.0668128	7.26e-06	1.32e-12	0.0636687
CHOW_RASSF1_TARGETS_UP	0.0996601	0.0115284	0.378749	0.0969688	-0.0427712	0.497873	0.0939235	-0.119171	0.00106691	0.00920066	-0.0501378
CHUNG_BLISTER_CYTOTOXICITY_DN	0.032838	-0.0358231	0.22775	0.0358949	0.0253323	0.840072	0.0352404	0.0495607	0.301729	0.457151	0.0130233
CHUNG_BLISTER_CYTOTOXICITY_UP	0.116996	-0.0255217	0.0214686	0.117175	0.0349148	0.0364921	0.114546	-0.0157081	0.137984	0.00560325	-0.002105
CHYLA_CBFA2T3_TARGETS_DN	0.0159456	-0.0168806	0.271069	0.0158027	-0.0539936	0.0961708	0.0163192	-0.0259468	0.102244	0.0652875	-0.0322737
CHYLA_CBFA2T3_TARGETS_UP	0.0399855	0.0240805	0.0115335	0.0411082	-0.0002376	0.776066	0.0412212	0.0251214	0.0980345	0.0287888	0.0163215
CLASPER_LYMPHATIC_VESSELS_DURING_METASTASIS_DN	0.0731039	0.105128	2.46e-07	0.0717839	0.0831586	0.0900527	0.0713778	0.165519	1.45e-08	2.17e-13	0.117936
COATES_MACROPHAGE_M1_VS_M2_DN	0.0351597	-0.102758	0.100188	0.0422885	0.0245276	0.846775	0.0384088	-0.0304024	0.477163	0.378462	-0.0362108
COATES_MACROPHAGE_M1_VS_M2_UP	0.0293756	0.123665	3.48e-09	0.0280863	0.163785	3.26e-08	0.0292798	0.181345	2.54e-09	4.77e-22	0.156265
COLDREN_GEFITINIB_RESISTANCE_DN	0.0260768	0.112959	1.82e-16	0.0275593	0.187621	8.9e-19	0.0266376	0.126194	7.14e-13	6.58e-43	0.142258
COLDREN_GEFITINIB_RESISTANCE_UP	0.0504539	0.0734087	0.00016746	0.0460262	-0.0806564	0.00362158	0.0477935	0.0131883	0.14033	1.27e-05	0.0019802
COLIN_PILOCYTIC_ASTROCYTOMA_VS_GLIOBLASTOMA_DN	0.220936	-0.0167003	0.137043	0.221409	-0.0449588	0.00489065	0.221094	0.0217444	0.309272	0.00942073	-0.0133049
COLIN_PILOCYTIC_ASTROCYTOMA_VS_GLIOBLASTOMA_UP	0.0701834	0.199423	4.78e-38	0.0694301	0.254651	1.19e-26	0.0718621	0.265889	8.5e-31	1.12e-89	0.239988
COLINA_TARGETS_OF_4EBP1_AND_4EBP2	0.0587351	-0.0158299	0.44109	0.061796	0.028936	0.0722217	0.0601759	-0.0299868	0.38211	0.184126	-0.0056269
COLLER_MYC_TARGETS_UP	0.274852	-0.03586	0.00300121	0.271829	0.00674762	0.438094	0.264233	-0.118899	1.91e-11	1.31e-11	-0.0493371
CONCANNON_APOPTOSIS_BY_EPOXOMICIN_DN	0.097337	0.00513297	0.695893	0.0986675	0.035982	0.328537	0.0926648	-0.0872565	0.00143568	0.0135221	-0.0153805
CONCANNON_APOPTOSIS_BY_EPOXOMICIN_UP	0.0840676	-0.0470251	0.00020964	0.0868356	-0.0097907	0.78714	0.0880304	0.0127791	0.549446	0.00486257	-0.0146789
CONRAD_STEM_CELL	0.0682141	0.082663	0.00299034	0.0709366	0.163429	2.9e-06	0.0684186	0.0754583	0.0281375	6.55e-08	0.107183
CORRE_MULTIPLE_MYELOMA_DN	0.0343453	0.00915429	0.836452	0.0340159	0.00118931	0.888429	0.033224	0.0323108	0.349871	0.846137	0.0142182
CORRE_MULTIPLE_MYELOMA_UP	0.0181398	-0.134602	8.34e-06	0.0197436	-0.0097328	0.78714	0.0209404	-0.071445	0.0475945	4.01e-05	-0.0719265
COULOUARN_TEMPORAL_TGFB1_SIGNATURE_DN	0.0388104	0.0186678	0.31024	0.0399286	0.0358466	0.443994	0.0392252	0.119814	3.74e-05	0.00044969	0.0581093
COULOUARN_TEMPORAL_TGFB1_SIGNATURE_UP	0.0774427	-0.0600615	0.0165104	0.0818989	-0.0461602	0.0286973	0.0822008	0.0162438	0.802477	0.0151633	-0.0299926
COWLING_MYCN_TARGETS	0.0373392	-0.0695163	0.00458741	0.0386897	-0.0429086	0.358353	0.0389087	0.0149646	0.430376	0.0244529	-0.0324868
CREIGHTON_AKT1_SIGNALING_VIA_MTOR_DN	0.25236	0.0450476	0.00039694	0.235546	0.0150747	0.790562	0.230575	0.0203538	0.520287	0.00779448	0.0268254
CREIGHTON_AKT1_SIGNALING_VIA_MTOR_UP	0.149431	0.018477	0.0344907	0.145189	0.0408554	0.00451916	0.140842	-0.002353	0.999856	0.0075108	0.0189932
CREIGHTON_ENDOCRINE_THERAPY_RESISTANCE_1	0.0897078	-0.0333099	1.84e-06	0.0890927	-0.0321294	0.00034421	0.0890177	-0.0509289	1.1e-09	6.38e-16	-0.0387894
CREIGHTON_ENDOCRINE_THERAPY_RESISTANCE_2	0.024451	0.010697	0.127821	0.0245097	0.0190408	0.383572	0.0257143	0.0515812	0.00651419	0.0132362	0.0271064
CREIGHTON_ENDOCRINE_THERAPY_RESISTANCE_3	0.0520981	0.0343888	1.13e-06	0.0533356	0.0435801	0.00107758	0.0539012	0.0665512	3.82e-11	4.84e-17	0.0481734
CREIGHTON_ENDOCRINE_THERAPY_RESISTANCE_4	0.0772881	0.026955	0.00019932	0.0783044	0.064769	3.8e-11	0.0765915	-0.0017238	0.962356	4.1e-12	0.0300001
CREIGHTON_ENDOCRINE_THERAPY_RESISTANCE_5	0.060397	0.0440479	0.00028282	0.0604387	0.031577	0.0590629	0.0612202	0.0974881	1.88e-06	9.97e-09	0.0577043
CROMER_METASTASIS_DN	0.107621	-0.02853	0.00084054	0.107104	-0.0157651	0.42365	0.104798	-0.0434951	0.00274916	0.00010824	-0.0292634
CROMER_METASTASIS_UP	0.0868155	0.0366358	0.00331477	0.0823609	-0.039932	0.199015	0.0837971	-0.0040511	0.967407	0.0226038	-0.0024491
CROMER_TUMORIGENESIS_DN	0.0320326	0.0448935	0.389418	0.0346459	0.124368	0.0233772	0.0346459	0.100943	0.0232434	0.00957549	0.0900681
CROMER_TUMORIGENESIS_UP	0.0644448	0.0412104	0.00469232	0.0720306	0.158337	1.32e-10	0.0684617	0.0587869	0.00270565	1.03e-12	0.0861115
CROONQUIST_IL6_DEPRIVATION_DN	0.0848198	-0.108744	0.0527625	0.0810821	-0.0044361	0.36984	0.0713165	-0.553229	6.8e-07	2.44e-06	-0.222136
CROONQUIST_NRAS_SIGNALING_DN	0.0802001	-0.128922	0.0788926	0.0763946	-0.0104492	0.513689	0.0713749	-0.541847	5.28e-07	3.73e-06	-0.227073
CROONQUIST_NRAS_SIGNALING_UP	0.0386936	0.0496514	0.0191543	0.0413339	0.142313	0.00388397	0.04028	0.0863704	0.00690533	6.18e-05	0.0927782
CROONQUIST_NRAS_VS_STROMAL_STIMULATION_DN	0.144114	0.0460711	0.0743072	0.14278	0.0706108	0.00352087	0.140162	-0.0055732	0.830307	0.00977652	0.0370362
CROONQUIST_NRAS_VS_STROMAL_STIMULATION_UP	0.0275155	0.023616	0.782315	0.0269875	-0.116729	0.616931	0.0289776	-0.0170853	0.757457	0.918539	-0.0367328
CROONQUIST_STROMAL_STIMULATION_UP	0.172935	0.0635955	0.00101373	0.168188	0.0242681	0.0657351	0.169512	0.0852302	4.15e-08	1.06e-09	0.057698
CUI_GLUCOSE_DEPRIVATION	0.134732	0.0188225	0.0459947	0.134017	0.0658741	1.21e-05	0.131831	0.0218342	0.0454346	4.33e-06	0.0355103
CUI_TCF21_TARGETS_2_DN	0.0494158	0.00083361	0.702446	0.0517217	-0.0179453	0.578104	0.0524505	0.0657532	0.0309663	0.188008	0.0162138
CUI_TCF21_TARGETS_2_UP	0.0964361	0.0011697	0.578484	0.091523	0.00581714	0.200634	0.0904878	-0.0766031	0.00042247	0.00294965	-0.0232054
CUI_TCF21_TARGETS_DN	0.034933	-0.213003	9.35e-10	0.0379837	-0.15789	0.00250408	0.0334798	-0.235851	2.61e-05	4.49e-14	-0.202248
CUI_TCF21_TARGETS_UP	0.0423338	0.331679	1.54e-19	0.0428073	0.493282	6.58e-16	0.0414622	0.183846	0.00044407	1.7e-34	0.336269
DACOSTA_ERCC3_ALLELE_XPCS_VS_TTD_DN	0.0357912	-0.243675	5.83e-11	0.0365014	-0.26431	1.22e-09	0.0340479	-0.294307	6.61e-14	1.33e-29	-0.26743
DACOSTA_ERCC3_ALLELE_XPCS_VS_TTD_UP	0.0400737	0.0251749	0.00012209	0.040177	0.0127672	0.154949	0.0411062	0.0489633	1.36e-05	6.87e-08	0.0289685
DACOSTA_UV_RESPONSE_VIA_ERCC3_COMMON_DN	0.0560601	-0.0603517	0.00514059	0.0601769	-0.0812167	0.00495082	0.0620062	-0.0528915	0.0217923	6.61e-05	-0.06482
DACOSTA_UV_RESPONSE_VIA_ERCC3_COMMON_UP	0.0719469	0.0210411	0.0140905	0.0736252	0.0845315	0.00043531	0.0754714	0.0755093	0.00092611	1.14e-06	0.0603607
DACOSTA_UV_RESPONSE_VIA_ERCC3_DN	0.068576	-0.0301006	0.0901933	0.0734416	-0.0405705	0.100958	0.0757103	-0.0261793	0.0847095	0.0261123	-0.0322834
DACOSTA_UV_RESPONSE_VIA_ERCC3_TTD_DN	0.0495879	0.00832872	0.759913	0.0510865	-0.0197649	0.640304	0.053437	0.0394281	0.0940912	0.404668	0.00933064
DACOSTA_UV_RESPONSE_VIA_ERCC3_TTD_UP	0.124599	0.0380008	0.00012502	0.119902	-0.0195174	0.464369	0.125948	0.05162	0.00069012	6.53e-06	0.0233678
DACOSTA_UV_RESPONSE_VIA_ERCC3_UP	0.110271	0.0135387	0.0322341	0.107782	0.0130236	0.465313	0.110056	0.0498323	8.46e-10	4.33e-09	0.0254649
DACOSTA_UV_RESPONSE_VIA_ERCC3_XPCS_DN	0.0364706	0.0703189	0.00204975	0.0387408	0.0666237	0.123363	0.0410869	0.111645	0.00120277	3.91e-05	0.0828627
DACOSTA_UV_RESPONSE_VIA_ERCC3_XPCS_UP	0.0568061	0.0151885	0.452897	0.0529312	-0.14021	0.00074361	0.0574332	-0.0327445	0.302678	0.00534448	-0.0525887
DAIRKEE_CANCER_PRONE_RESPONSE_BPA	0.157417	-0.0307322	0.0472798	0.153112	-0.0252097	0.303323	0.149041	-0.099561	6.17e-07	1.69e-06	-0.0518343
DAIRKEE_CANCER_PRONE_RESPONSE_BPA_E2	0.224541	-0.0146399	0.0452948	0.219569	0.00222651	0.689572	0.217332	-0.0430207	0.00220882	0.00389688	-0.018478
DAIRKEE_CANCER_PRONE_RESPONSE_E2	0.0736827	-0.0181889	0.596769	0.0692918	0.00117997	0.603261	0.0700567	-0.0515711	0.0475887	0.228479	-0.02286
DANG_BOUND_BY_MYC	0.212319	-0.0047178	0.213209	0.210003	0.00829098	0.0187839	0.206723	-0.0161147	0.00013869	6.62e-05	-0.0041805
DANG_MYC_TARGETS_DN	0.139541	0.0475992	0.00760211	0.137425	-0.0047101	0.679368	0.137661	0.0589347	0.0170313	0.0047449	0.0339413
DANG_MYC_TARGETS_UP	0.351079	-0.0218943	0.00823101	0.34732	-0.0029319	0.817387	0.33915	-0.0502893	6.2e-08	1.07e-07	-0.0250385
DANG_REGULATED_BY_MYC_DN	0.131701	0.0317871	0.00051817	0.134754	0.0673576	6.31e-05	0.132694	0.0597142	1.15e-06	1.92e-11	0.0529529
DANG_REGULATED_BY_MYC_UP	0.16682	-0.0539051	9.07e-05	0.16057	-0.0477938	0.0409328	0.161872	-0.0837283	8.62e-08	1.42e-10	-0.0618091
DARWICHE_PAPILLOMA_PROGRESSION_RISK	0.02307	-0.139671	6.64e-08	0.0250449	-0.084113	0.00514173	0.0245119	-0.0374833	0.148984	1.55e-08	-0.087089
DARWICHE_PAPILLOMA_RISK_HIGH_DN	0.058283	0.00074378	0.506893	0.0588075	0.0171072	0.179044	0.0601985	0.00877637	0.235651	0.261708	0.00887578
DARWICHE_PAPILLOMA_RISK_HIGH_UP	0.187313	-0.0218205	7.02e-07	0.183401	-0.0255088	0.00070912	0.182749	-0.0236393	0.00011122	2.76e-11	-0.0236562
DARWICHE_PAPILLOMA_RISK_LOW_DN	0.0536355	-0.0223403	0.00460603	0.0541191	-0.0191105	0.251396	0.0559207	-0.014868	0.196472	0.0101399	-0.0187729
DARWICHE_PAPILLOMA_RISK_LOW_UP	0.183553	-0.0103453	0.0474945	0.179748	-0.0106939	0.237031	0.179713	-0.0096739	0.0886505	0.0317185	-0.0102377
DARWICHE_SKIN_TUMOR_PROMOTER_DN	0.0870433	-0.0089543	0.17491	0.0868807	0.00556008	0.718702	0.0879488	-0.0103711	0.0852313	0.16955	-0.0045885
DARWICHE_SKIN_TUMOR_PROMOTER_UP	0.153129	-0.0154441	0.00121804	0.150317	-0.0217013	0.00381695	0.150181	-0.0105831	0.183688	9.62e-05	-0.0159095
DARWICHE_SQUAMOUS_CELL_CARCINOMA_DN	0.053428	0.0237701	0.0207164	0.0539035	0.0479012	0.00982604	0.0548712	0.012935	0.287862	0.00341186	0.0282021
DARWICHE_SQUAMOUS_CELL_CARCINOMA_UP	0.190208	-0.0224781	3.65e-09	0.186953	-0.0226935	2.32e-05	0.186072	-0.0234741	0.00014593	9.85e-15	-0.0228819
DASU_IL6_SIGNALING_SCAR_UP	0.0580466	-0.059023	0.0226269	0.0579165	-0.0807592	0.0867292	0.0548658	-0.085706	0.00228999	0.00040047	-0.0751628
DASU_IL6_SIGNALING_UP	0.08333	-0.0448355	0.0853627	0.0785397	-0.14903	1.2e-05	0.0794209	-0.0123436	0.504932	6.23e-05	-0.0687365
DAUER_STAT3_TARGETS_DN	0.0579278	0.0242265	0.228132	0.0579921	0.0654561	0.166551	0.0592926	0.0167878	0.684121	0.294009	0.0354901
DAUER_STAT3_TARGETS_UP	0.0568932	-0.0105337	0.724096	0.0640852	0.115999	0.0830789	0.0632079	0.108884	0.00023467	0.00105215	0.0714496
DAVICIONI_MOLECULAR_ARMS_VS_ERMS_DN	0.060203	0.0348808	0.00507937	0.0590084	0.0208187	0.0642722	0.0602053	0.0701029	0.00022804	1.13e-05	0.0419341
DAVICIONI_MOLECULAR_ARMS_VS_ERMS_UP	0.0482786	0.0281375	0.00200886	0.0485993	0.0174658	0.30814	0.0490386	0.00611805	0.958263	0.0213737	0.0172405
DAVICIONI_PAX_FOXO1_SIGNATURE_IN_ARMS_UP	0.057115	0.0321055	0.0327808	0.0560812	0.0239233	0.500577	0.0568993	0.0854605	0.00595316	0.00516422	0.0471631
DAVICIONI_RHABDOMYOSARCOMA_PAX_FOXO1_FUSION_UP	0.058066	0.0275863	0.0590682	0.0599336	0.0841771	5.11e-05	0.0597709	0.102006	2.23e-07	2.83e-10	0.0712565
DAVICIONI_TARGETS_OF_PAX_FOXO1_FUSIONS_DN	0.0368426	0.0189927	0.289891	0.0360024	-0.0366623	0.315406	0.0362248	-0.0272949	0.0592853	0.107486	-0.0149881
DAVICIONI_TARGETS_OF_PAX_FOXO1_FUSIONS_UP	0.0864431	0.0497521	1.7e-05	0.0873069	0.0452603	0.00551124	0.0869207	0.0949886	3.12e-09	1.98e-13	0.0633337
DAVIES_MULTIPLE_MYELOMA_VS_MGUS_DN	0.0910216	-0.0174782	0.508418	0.0888832	-0.052281	0.201336	0.0891083	0.0167574	0.783859	0.537988	-0.0176673
DAWSON_METHYLATED_IN_LYMPHOMA_TCL1	0.0211881	-0.0160646	0.216032	0.0217721	0.013364	0.439172	0.0221188	-0.0071243	0.786521	0.519603	-0.003275
DAZARD_RESPONSE_TO_UV_NHEK_DN	0.0415114	-0.0492059	0.0528256	0.0447284	-0.0725786	0.00963406	0.0455778	-0.082731	0.00055107	3.64e-05	-0.0681719
DAZARD_RESPONSE_TO_UV_NHEK_UP	0.239771	0.00076195	0.753413	0.241377	0.0138672	0.118533	0.237571	0.0153435	0.012767	0.0350455	0.00999091
DAZARD_RESPONSE_TO_UV_SCC_DN	0.0480067	-0.111438	0.00035853	0.0537413	-0.0517539	0.0812989	0.0529202	-0.0847241	0.00123823	5.95e-06	-0.0826387
DAZARD_RESPONSE_TO_UV_SCC_UP	0.206159	0.0333773	2.25e-07	0.203854	0.0622655	9.47e-15	0.19571	0.00481911	0.144281	3.92e-19	0.0334873
DAZARD_UV_RESPONSE_CLUSTER_G1	0.356277	-0.0080112	0.0401676	0.359692	-0.0043781	0.662651	0.349502	-0.0221139	4.33e-05	0.00012472	-0.0115011
DAZARD_UV_RESPONSE_CLUSTER_G6	0.043766	-0.0451546	0.0374589	0.0465732	-0.0275814	0.361968	0.0475529	-0.0626387	0.00086363	0.0008996	-0.0451249
DE_YY1_TARGETS_DN	0.128097	-0.009297	0.705032	0.126512	-0.0366417	0.222244	0.122883	-0.0423675	0.0165364	0.0639756	-0.0294354
DEBIASI_APOPTOSIS_BY_REOVIRUS_INFECTION_DN	0.0550178	0.0399975	0.00082358	0.0550868	0.0009641	0.881539	0.0563581	0.0379851	0.00633859	0.00040865	0.0263156
DEBIASI_APOPTOSIS_BY_REOVIRUS_INFECTION_UP	0.0770271	-0.0053152	0.796105	0.0808449	0.0186541	0.518873	0.0809276	0.00692089	0.243206	0.596578	0.00675326
DELACROIX_RAR_BOUND_ES	0.0644836	-0.0188869	0.0607336	0.0647661	-0.0214026	0.179867	0.0640226	0.00751609	0.495133	0.107324	-0.0109245
DELACROIX_RAR_TARGETS_DN	0.104432	0.0487322	0.0734975	0.0987742	0.127455	0.00015629	0.104988	-0.0085364	0.893722	0.00080547	0.0558836
DELACROIX_RAR_TARGETS_UP	0.122099	0.0436569	0.0410814	0.11396	-0.0492906	0.252783	0.115046	0.0513339	0.0262672	0.0116975	0.0152334
DELACROIX_RARG_BOUND_MEF	0.109076	0.0196798	0.00059018	0.109126	0.0131038	0.130241	0.108732	0.0451441	4.69e-07	1.13e-08	0.0259759
DELASERNA_MYOD_TARGETS_DN	0.0708707	0.0121574	0.111196	0.0666293	-0.0890342	2.58e-05	0.067022	0.0179853	0.41367	0.00012797	-0.0196305
DELASERNA_MYOD_TARGETS_UP	0.0448783	-0.0478448	0.0847734	0.0454639	-0.0171432	0.91826	0.0459043	-0.0599888	0.0339806	0.0649319	-0.041659
DELPUECH_FOXO3_TARGETS_DN	0.0929991	-0.136473	0.0122573	0.0960171	-0.0331209	0.182899	0.0969686	-0.233807	5.97e-06	2.46e-06	-0.134467
DELPUECH_FOXO3_TARGETS_UP	0.072772	0.0571183	0.00109526	0.0781119	0.125102	0.00062045	0.0742361	0.0946528	7.88e-05	1.63e-08	0.0922912
DELYS_THYROID_CANCER_DN	0.0425135	0.0473325	0.00831579	0.0424429	0.0304362	0.226036	0.0431427	0.101063	5.11e-06	1.82e-06	0.0596105
DELYS_THYROID_CANCER_UP	0.073243	0.0260533	0.0248171	0.0756345	0.0463132	0.0311292	0.0748733	0.0736828	4.38e-07	8.83e-08	0.0486831
DEMAGALHAES_AGING_UP	0.194603	-0.0241684	0.0522641	0.197102	-0.0168865	0.0986612	0.195488	-0.0044394	0.921563	0.0981576	-0.0151648
DEN_INTERACT_WITH_LCA5	0.437872	-0.00882	0.483104	0.43062	-0.0024757	0.738742	0.424221	-0.0364987	1.29e-05	0.00040784	-0.0159315
DER_IFN_ALPHA_RESPONSE_UP	0.121035	0.0214979	0.0978997	0.122416	0.0471687	0.0124086	0.122237	0.0395564	0.00150165	0.0001852	0.0360743
DER_IFN_BETA_RESPONSE_UP	0.145146	0.00730911	0.411401	0.145335	0.020907	0.133005	0.146404	0.0138026	0.188034	0.165134	0.0140062
DER_IFN_GAMMA_RESPONSE_UP	0.140132	0.0294853	0.0159809	0.141026	0.0569896	0.00441961	0.140159	0.0277736	0.00328674	3.09e-05	0.0380828
DESERT_PERIPORTAL_HEPATOCELLULAR_CARCINOMA_SUBCLASS_UP	0.0113719	-0.0057823	0.910976	0.0115938	-0.0225549	0.780344	0.0111045	0.115549	0.0336375	0.279828	0.0290705
DESERT_PERIVENOUS_HEPATOCELLULAR_CARCINOMA_SUBCLASS_UP	0.057246	-0.0082721	0.182414	0.0562425	-0.0443902	0.0105945	0.0578964	-0.002974	0.79633	0.0437838	-0.0185454
DESERT_STEM_CELL_HEPATOCELLULAR_CARCINOMA_SUBCLASS_UP	0.151784	-0.0314814	3.26e-07	0.152666	-0.0295378	0.00579887	0.149449	-0.0749007	5.21e-16	1.56e-21	-0.0453066
DEURIG_T_CELL_PROLYMPHOCYTIC_LEUKEMIA_DN	0.0591664	0.00774637	0.372908	0.0595444	-0.0041227	0.476566	0.0590945	-0.0072618	0.685665	0.648298	-0.0012127
DEURIG_T_CELL_PROLYMPHOCYTIC_LEUKEMIA_UP	0.0747332	-0.0075376	0.0561484	0.0741498	-0.0143049	0.0806681	0.0727745	-0.0477441	3.97e-05	2.47e-05	-0.0231955
DIAZ_CHRONIC_MEYLOGENOUS_LEUKEMIA_DN	0.132627	0.0157701	0.00894762	0.134258	0.00829691	0.120148	0.135077	0.0376635	0.00060041	7.54e-05	0.0205769
DIAZ_CHRONIC_MEYLOGENOUS_LEUKEMIA_UP	0.237122	-0.0115109	0.00680127	0.233292	-0.0029005	0.927388	0.23022	-0.0293462	6.44e-09	1.26e-08	-0.0145858
DING_LUNG_CANCER_EXPRESSION_BY_COPY_NUMBER	0.0670183	-0.118594	9.69e-24	0.067137	-0.130094	1.58e-16	0.0666362	-0.146564	3.94e-20	5.51e-55	-0.131751
DING_LUNG_CANCER_MUTATED_SIGNIFICANTLY	0.0752484	-0.0395283	0.00348593	0.072708	-0.111693	0.00052034	0.0732868	-0.0503861	0.0845083	2.14e-05	-0.0672024
DIRMEIER_LMP1_RESPONSE_EARLY	0.197909	-0.0156878	0.296073	0.195157	-0.0207153	0.330238	0.196692	0.0426756	0.00306678	0.0125987	0.00209081
DIRMEIER_LMP1_RESPONSE_LATE_DN	0.361404	0.0235477	5.58e-05	0.356347	0.0264675	0.00027839	0.353714	0.0317977	9.51e-05	5.9e-10	0.027271
DIRMEIER_LMP1_RESPONSE_LATE_UP	0.0895781	-0.030474	0.0476176	0.0858731	-0.0762577	0.0028721	0.0921955	-0.0207959	0.340375	0.00282678	-0.0425092
DITTMER_PTHLH_TARGETS_DN	0.144648	-0.0337348	9.41e-06	0.151104	0.0225189	0.0372539	0.145718	-0.0181651	0.155035	8.57e-06	-0.0097937
DITTMER_PTHLH_TARGETS_UP	0.187298	0.0114392	0.127703	0.183644	0.0137205	0.113314	0.177396	-0.0085399	0.321111	0.0966443	0.00553991
DOANE_BREAST_CANCER_CLASSES_DN	0.126376	0.0565104	7.57e-06	0.12651	0.108869	7.29e-08	0.122035	0.00173548	0.929441	2.2e-10	0.0557049
DOANE_BREAST_CANCER_CLASSES_UP	0.0174636	0.0484072	0.079827	0.0180398	-0.0288644	0.608616	0.0173813	0.130687	0.0048453	0.0104168	0.0500766
DOANE_BREAST_CANCER_ESR1_DN	0.0352101	0.192141	1.46e-08	0.032197	0.425361	1.94e-10	0.0342631	0.206172	0.00123823	4.08e-18	0.274558
DOANE_BREAST_CANCER_ESR1_UP	0.0276199	0.0679175	0.00475814	0.0266598	-0.0254039	0.724159	0.0291441	0.138826	1.76e-05	9.42e-06	0.0604464
DOANE_RESPONSE_TO_ANDROGEN_DN	0.0726112	0.0471253	6.41e-10	0.0736052	0.0692743	1.41e-07	0.073169	0.0363612	0.00163083	1.45e-16	0.0509202
DOANE_RESPONSE_TO_ANDROGEN_UP	0.0472632	-0.0028802	0.866865	0.0509421	0.0650842	0.00335642	0.0496545	-0.0099321	0.800101	0.059226	0.017424
DODD_NASOPHARYNGEAL_CARCINOMA_DN	0.162899	-0.0519141	1.42e-06	0.162193	-0.0297394	0.0433603	0.161261	-0.0946413	4.42e-12	2.6e-16	-0.058765
DODD_NASOPHARYNGEAL_CARCINOMA_UP	0.0456048	0.0340162	0.0009937	0.0479759	0.059761	0.00295726	0.0471206	0.0759911	2.22e-07	2.76e-10	0.0565894
DORN_ADENOVIRUS_INFECTION_12HR_DN	0.15082	-0.0274695	0.116115	0.150656	-0.0072557	0.857143	0.145237	-0.0147632	0.785912	0.531501	-0.0164961
DORN_ADENOVIRUS_INFECTION_12HR_UP	0.0872419	0.0243509	0.199753	0.0836283	0.0549763	0.380471	0.0817847	-0.0132085	0.515922	0.371862	0.0220396
DORN_ADENOVIRUS_INFECTION_24HR_DN	0.16272	-0.0013625	0.631685	0.160644	0.0150981	0.417418	0.155636	-0.0059569	0.825141	0.802487	0.00259289
DORN_ADENOVIRUS_INFECTION_32HR_DN	0.170164	0.00429444	0.799311	0.167248	0.0196263	0.185615	0.161641	0.0182679	0.372471	0.446963	0.0140629
DORN_ADENOVIRUS_INFECTION_48HR_DN	0.16456	0.00550656	0.820515	0.163724	0.0359829	0.186004	0.156243	0.0139596	0.439694	0.49326	0.018483
DORSAM_HOXA9_TARGETS_DN	0.150066	-0.0201617	0.245724	0.148685	0.00177383	0.791925	0.148756	-0.0475564	0.0061472	0.0363238	-0.0219814
DORSAM_HOXA9_TARGETS_UP	0.139677	0.0377275	0.00625089	0.132566	0.00024162	0.852113	0.132499	-0.0172901	0.573117	0.071933	0.00689303
DORSEY_GAB2_TARGETS	0.0805692	-0.0273952	0.817749	0.0800881	-0.0239739	0.982206	0.0753279	0.0298888	0.369908	0.876512	-0.0071601
DOUGLAS_BMI1_TARGETS_DN	0.0247252	-0.0212369	0.604099	0.0268638	-0.0504412	0.139877	0.0286927	0.0892123	0.00075004	0.00363699	0.00584471
DOUGLAS_BMI1_TARGETS_UP	0.0560857	-0.0015614	0.955859	0.0579224	0.00854834	0.632903	0.0572166	-0.0226215	0.130933	0.5347	-0.0052115
DUAN_PRDM5_TARGETS	0.0159137	-0.031615	0.523578	0.0188598	0.0635486	0.177979	0.0172882	0.00449535	0.701145	0.486742	0.012143
DUNNE_TARGETS_OF_AML1_MTG8_FUSION_UP	0.0331315	0.058032	0.143096	0.036694	0.0865875	0.0625487	0.0379578	0.0976947	0.022375	0.00916737	0.0807714
DURAND_STROMA_NS_UP	0.0141116	0.0350845	0.293849	0.0150703	0.114474	0.00551793	0.015479	0.145183	0.00020127	4.16e-05	0.0982472
DURAND_STROMA_S_UP	0.013808	0.0471093	0.0638207	0.0153592	0.0751747	0.026693	0.0147913	0.100718	0.00057052	0.00010756	0.0743339
DURCHDEWALD_SKIN_CARCINOGENESIS_DN	0.0701976	-0.0143812	0.523728	0.0734149	-0.0159878	0.369757	0.0725434	-0.0113441	0.67193	0.666042	-0.0139043
DURCHDEWALD_SKIN_CARCINOGENESIS_UP	0.039657	-0.115317	8.43e-05	0.0370451	-0.144022	3.96e-05	0.0362579	-0.0824392	0.0315613	3.04e-08	-0.113926
DUTERTRE_ESTRADIOL_RESPONSE_24HR_DN	0.0632062	-0.0158623	0.814164	0.0668865	0.00491668	0.820514	0.0666714	0.0594027	0.0285871	0.244289	0.0161523
DUTERTRE_ESTRADIOL_RESPONSE_24HR_UP	0.0316906	-0.0964461	0.562853	0.0320079	-0.0130185	0.831452	0.0315876	-0.328527	0.0002038	0.0050653	-0.145997
DUTERTRE_ESTRADIOL_RESPONSE_6HR_DN	0.0197096	-0.0173165	0.378375	0.0230504	0.142533	0.00273115	0.0217238	0.0442843	0.427077	0.017022	0.0565001
DUTERTRE_ESTRADIOL_RESPONSE_6HR_UP	0.0582392	-0.022389	0.0342437	0.059301	-0.0049741	0.413153	0.0600214	-0.0316488	0.244406	0.0785799	-0.0196706
DUTTA_APOPTOSIS_VIA_NFKB	0.10251	-0.010938	0.606794	0.102441	-0.0041668	0.887971	0.10015	-0.0590874	0.0151883	0.142008	-0.0247307
EBAUER_MYOGENIC_TARGETS_OF_PAX3_FOXO1_FUSION	0.0506981	-0.093012	0.00033321	0.0529975	-0.11731	0.0231151	0.0548955	-0.0495009	0.173744	0.00014182	-0.0866077
EBAUER_TARGETS_OF_PAX3_FOXO1_FUSION_DN	0.0190417	0.0431976	0.592514	0.0192664	-0.0291462	0.450078	0.0200903	0.0520192	0.173659	0.407171	0.0220235
EBAUER_TARGETS_OF_PAX3_FOXO1_FUSION_UP	0.0557405	0.00894231	0.356609	0.0550472	0.00231658	0.993852	0.0545218	0.0136181	0.568179	0.782686	0.00829234
EGUCHI_CELL_CYCLE_RB1_TARGETS	0.0466122	-0.349629	0.234269	0.0514841	-0.0134538	0.916395	0.0425443	-0.943853	0.00020058	0.00265184	-0.435645
EHLERS_ANEUPLOIDY_UP	0.0877247	-0.0225321	0.119564	0.0954006	0.0439624	0.21348	0.0899381	-0.0061759	0.785472	0.251652	0.00508479
EINAV_INTERFERON_SIGNATURE_IN_CANCER	0.0399602	0.0960967	0.602695	0.031445	-0.226316	0.0744941	0.0452873	0.102515	0.0467471	0.0549439	-0.0092348
ELLWOOD_MYC_TARGETS_DN	0.104453	0.0834041	1.72e-09	0.0959212	0.0645546	0.00166735	0.0971074	0.103977	3.12e-07	8.13e-16	0.0839787
ELVIDGE_HIF1A_AND_HIF2A_TARGETS_DN	0.0835072	-0.0737562	0.115096	0.0916026	-0.0517922	0.449478	0.0867752	-0.0402924	0.0805904	0.0896188	-0.0552803
ELVIDGE_HIF1A_AND_HIF2A_TARGETS_UP	0.0341728	-0.0210339	0.942097	0.0339995	0.170796	0.00643585	0.0363354	-0.0251412	0.828808	0.102026	0.0415405
ELVIDGE_HIF1A_TARGETS_DN	0.0876087	-0.0452275	0.724096	0.0984759	0.0374449	0.341005	0.0916731	-0.0387737	0.31692	0.531612	-0.0155188
ELVIDGE_HIF1A_TARGETS_UP	0.0408676	-0.0046184	0.919889	0.040144	0.073505	0.00587994	0.0435283	-0.0041483	0.887173	0.0988236	0.0215795
ELVIDGE_HYPOXIA_BY_DMOG_DN	0.0539295	-0.0202112	0.531996	0.0564421	0.0907146	0.00015367	0.05696	-0.0293343	0.269569	0.0015253	0.0137231
ELVIDGE_HYPOXIA_BY_DMOG_UP	0.0914975	-0.0326195	0.352373	0.0989523	-0.0099758	0.413685	0.0922877	-0.0295812	0.200758	0.315084	-0.0240589
ELVIDGE_HYPOXIA_DN	0.074646	-0.0352892	0.0401415	0.0770473	0.0583059	0.0153795	0.0752721	-0.0506816	0.00405886	0.00024321	-0.0092216
ELVIDGE_HYPOXIA_UP	0.0981824	-0.0086486	0.884333	0.103575	0	0.951423	0.100125	0.0106469	0.860469	0.995583	0.00066611
ENGELMANN_CANCER_PROGENITORS_DN	0.0274044	-0.0452536	0.0919875	0.0288851	-0.0688716	0.0915866	0.0251872	0.0428183	0.576135	0.099609	-0.023769
ENGELMANN_CANCER_PROGENITORS_UP	0.0408848	-0.0983533	3.91e-05	0.0421812	-0.0755794	0.0351008	0.0412818	-0.137375	3.51e-05	1.48e-08	-0.103769
ENK_UV_RESPONSE_EPIDERMIS_DN	0.075731	-0.0049834	0.92186	0.0805334	0.0448552	0.0151409	0.0785387	0.033793	0.0345503	0.0182286	0.0245549
ENK_UV_RESPONSE_EPIDERMIS_UP	0.0851777	-0.0108431	0.140972	0.0867515	0.0324949	0.00078226	0.0841493	-0.0245591	0.0187741	0.00020648	-0.0009691
ENK_UV_RESPONSE_KERATINOCYTE_DN	0.112254	-0.0314174	0.00013954	0.112495	-0.0403136	0.00045463	0.112059	-0.0645213	1.75e-10	8.9e-15	-0.0454174
ENK_UV_RESPONSE_KERATINOCYTE_UP	0.24269	0.0186523	1.13e-06	0.239251	0.0287522	5.16e-06	0.236139	0.0348077	1.08e-10	7.81e-19	0.0274041
EPPERT_CE_HSC_LSC	0.0236009	-0.0085589	0.909342	0.0231983	-0.229858	1.57e-07	0.0233856	-0.0240549	0.359742	8.17e-06	-0.0874907
EPPERT_HSC_R	0.066059	0.0299462	0.0223264	0.0662482	-0.0194752	0.826983	0.0695691	0.0627717	0.00095725	0.00126941	0.0244142
EPPERT_LSC_R	0.0589943	0.00235231	0.784899	0.0578794	-0.0485262	0.0395506	0.0581677	-0.0109243	0.702668	0.264843	-0.0190327
EPPERT_PROGENITOR	0.0843727	-0.0225052	0.140335	0.0839707	-0.0294915	0.738038	0.0857049	-0.0636302	0.00025065	0.00174725	-0.0385423
FAELT_B_CLL_WITH_VH_REARRANGEMENTS_DN	0.181436	0.0513484	5.13e-07	0.175294	0.0927943	4.82e-14	0.168523	0.0228199	0.0447254	1.34e-18	0.0556542
FAELT_B_CLL_WITH_VH_REARRANGEMENTS_UP	0.130902	-0.0323558	0.0146687	0.130059	-0.0449453	0.0007001	0.126642	-0.0020741	0.534953	0.00047499	-0.0264584
FAELT_B_CLL_WITH_VH3_21_DN	0.136576	-0.0027112	0.629282	0.13549	-0.0283133	0.0547764	0.132946	0.00261003	0.967407	0.339584	-0.0094715
FAELT_B_CLL_WITH_VH3_21_UP	0.0917774	0.0239312	0.497383	0.0932363	0.0710195	0.00133989	0.093372	-0.0313726	0.173687	0.00591983	0.0211927
FALVELLA_SMOKERS_WITH_LUNG_CANCER	0.109545	-0.0245749	0.906419	0.115556	0.0523572	0.200666	0.111042	0.01197	0.881123	0.722326	0.0132508
FARDIN_HYPOXIA_11	0.131928	-0.0915438	0.0295846	0.140525	-0.11797	0.0695916	0.129536	-0.119824	0.00368221	0.00062385	-0.109779
FARMER_BREAST_CANCER_APOCRINE_VS_BASAL	0.0650053	0.0226311	0.00332673	0.0649733	0.0299272	0.054715	0.0638497	-0.0066023	0.633151	0.00589913	0.0153187
FARMER_BREAST_CANCER_APOCRINE_VS_LUMINAL	0.0650475	0.0277009	0.00023094	0.064187	0.0326537	0.218928	0.0632623	0.0220815	0.0719486	0.00033449	0.0274787
FARMER_BREAST_CANCER_BASAL_VS_LULMINAL	0.0776429	0.00726598	0.173834	0.0751255	-0.0012776	0.525651	0.0745184	-0.0284297	0.00296826	0.0116453	-0.0074804
FARMER_BREAST_CANCER_CLUSTER_1	0.0108835	0.12878	0.428613	0.00870336	0.342958	0.339556	0.0108922	0.145117	0.0704276	0.164725	0.205618
FARMER_BREAST_CANCER_CLUSTER_2	0.0379702	-0.050851	0.555228	0.0343415	-0.0304536	0.758855	0.0325328	-0.356239	0.00062769	0.0114167	-0.145848
FERNANDEZ_BOUND_BY_MYC	0.170606	0.00814297	0.0519839	0.166706	-0.0045259	0.876055	0.165957	0.00091916	0.834755	0.365535	0.00151207
FERRANDO_T_ALL_WITH_MLL_ENL_FUSION_DN	0.220724	-0.0086449	0.256984	0.207533	-0.0355288	0.0788379	0.203588	-0.0799754	8.77e-07	3.16e-06	-0.041383
FERRANDO_T_ALL_WITH_MLL_ENL_FUSION_UP	0.143096	-0.0059173	0.145227	0.141991	-0.0790813	4.98e-09	0.144308	0.00147017	0.881869	1.57e-07	-0.0278428
FERREIRA_EWINGS_SARCOMA_UNSTABLE_VS_STABLE_DN	0.0515449	0.0230342	0.112418	0.0480098	-0.0813798	0.0266289	0.0516922	0.0447319	0.0494907	0.00721352	-0.0045379
FERREIRA_EWINGS_SARCOMA_UNSTABLE_VS_STABLE_UP	0.0742943	-0.0555107	0.00934797	0.0717102	-0.0251447	0.555523	0.0693412	-0.193061	4.38e-06	3.94e-06	-0.0912389
FEVR_CTNNB1_TARGETS_DN	0.14479	-0.0605703	1.95e-05	0.142002	-0.0467129	0.0102483	0.139213	-0.126471	7.41e-11	1.17e-14	-0.0779179
FEVR_CTNNB1_TARGETS_UP	0.0614421	0.0153001	0.0861626	0.0654002	0.0560901	0.00038858	0.0648334	0.0769565	7.59e-09	1.15e-10	0.0494489
FIGUEROA_AML_METHYLATION_CLUSTER_1_DN	0.0272009	-0.0383192	0.00044682	0.0283324	-0.107722	9.12e-08	0.0289204	-0.0236018	0.0447254	7.17e-10	-0.0565476
FIGUEROA_AML_METHYLATION_CLUSTER_1_UP	0.040804	-0.0628269	1.06e-08	0.040978	-0.0961036	8.04e-08	0.040418	-0.0662544	4.27e-05	3.8e-17	-0.0750616
FIGUEROA_AML_METHYLATION_CLUSTER_2_UP	0.0251537	-0.0052196	0.863623	0.026803	-0.0221342	0.42365	0.0252698	-0.0867668	0.0581323	0.260837	-0.0380402
FIGUEROA_AML_METHYLATION_CLUSTER_3_DN	0.0658719	-0.0167741	0.497383	0.0699193	0.00050479	0.960214	0.0710687	0.00547126	0.70664	0.903174	-0.0035993
FIGUEROA_AML_METHYLATION_CLUSTER_3_UP	0.052133	-0.0307135	0.00165617	0.0532056	-0.0375469	0.0319058	0.0523595	-0.0334506	0.00088247	7.48e-06	-0.0339036
FIGUEROA_AML_METHYLATION_CLUSTER_4_UP	0.0673998	-0.0246322	0.0167984	0.0678196	-0.0292934	0.306734	0.0664244	-0.0625398	0.00012214	7.38e-05	-0.0388218
FIGUEROA_AML_METHYLATION_CLUSTER_5_DN	0.024778	0.028256	0.456688	0.0252778	0.269412	6.7e-09	0.0236823	0.0931092	0.147305	1.15e-07	0.130259
FIGUEROA_AML_METHYLATION_CLUSTER_6_DN	0.00855392	0.00569106	0.488353	0.00720684	-0.122719	0.576175	0.00846972	-0.365436	0.183335	0.43119	-0.160821
FIGUEROA_AML_METHYLATION_CLUSTER_6_UP	0.0584828	0.0127429	0.129981	0.0603685	0.0225925	0.494602	0.058169	-0.0099134	0.476155	0.323373	0.00847399
FIGUEROA_AML_METHYLATION_CLUSTER_7_UP	0.0507635	-0.0648477	1.88e-05	0.0540788	-0.0552914	0.00896557	0.0517787	-0.0738545	0.00012072	6.69e-09	-0.0646645
FIRESTEIN_CTNNB1_PATHWAY	0.0247004	-0.0710692	0.553664	0.0236244	-0.190029	0.03832	0.0296527	-0.0622929	0.0963596	0.053905	-0.107797
FIRESTEIN_PROLIFERATION	0.0294125	-0.0188877	0.454923	0.0293203	-0.0285182	0.287907	0.0308759	-0.0396147	0.0117225	0.0437082	-0.0290069
FISCHER_DIRECT_P53_TARGETS_META_ANALYSIS	0.0590759	0.0421805	0.00361307	0.0586181	-0.007515	0.82799	0.0596088	0.037919	0.00399856	0.00091583	0.0241948
FISCHER_DREAM_TARGETS	0.101348	-0.0508827	0.00477389	0.101057	-0.0056224	0.27366	0.0967491	-0.177168	6.23e-09	2.87e-09	-0.077891
FISCHER_G1_S_CELL_CYCLE	0.0387575	-0.0384472	0.167307	0.0391526	-0.0590571	0.14571	0.0415581	-0.0567068	0.0293261	0.0246477	-0.0514037
FISCHER_G2_M_CELL_CYCLE	0.0520357	-0.0159144	0.53824	0.0543615	0.0395106	0.783511	0.0508472	-0.177228	1.44e-05	0.00051807	-0.0512106
FLECHNER_BIOPSY_KIDNEY_TRANSPLANT_OK_VS_DONOR_DN	0.0954233	-0.0433831	0.202463	0.0950697	-0.0358359	0.172469	0.0965515	0.0212912	0.606041	0.260042	-0.0193093
FLECHNER_BIOPSY_KIDNEY_TRANSPLANT_OK_VS_DONOR_UP	0.183873	-0.005834	0.24557	0.182907	0.00352928	0.889819	0.180071	-0.013502	0.00030669	0.00380592	-0.0052689
FLECHNER_BIOPSY_KIDNEY_TRANSPLANT_REJECTED_VS_OK_DN	0.134838	0.0113458	0.00321199	0.13219	0.00588579	0.130818	0.130765	-0.0005532	0.868469	0.0146865	0.00555947
FLECHNER_BIOPSY_KIDNEY_TRANSPLANT_REJECTED_VS_OK_UP	0.0619924	0.00606823	0.487534	0.0636088	0.0258034	0.658315	0.064011	0.0405505	0.123089	0.373407	0.0241407
FLECHNER_PBL_KIDNEY_TRANSPLANT_OK_VS_DONOR_DN	0.131335	-0.0219599	0.138117	0.133902	0.011108	0.858824	0.129992	-0.0340081	0.0886505	0.167496	-0.0149533
FLECHNER_PBL_KIDNEY_TRANSPLANT_OK_VS_DONOR_UP	0.264605	-0.0022274	0.586577	0.259874	-0.0029738	0.440826	0.257573	-0.0205361	4.55e-05	0.00090352	-0.0085791
FLECHNER_PBL_KIDNEY_TRANSPLANT_REJECTED_VS_OK_DN	0.20997	-0.017878	0.00176414	0.210639	-0.0159074	0.0193627	0.207359	-0.0354231	8.85e-05	6.44e-07	-0.0230695
FLECHNER_PBL_KIDNEY_TRANSPLANT_REJECTED_VS_OK_UP	0.123755	-0.0189724	0.0287393	0.122464	-0.0185187	0.20857	0.119266	-0.025828	0.0409134	0.0107583	-0.0211063
FLORIO_NEOCORTEX_BASAL_RADIAL_GLIA_DN	0.039549	-0.0295668	0.631548	0.0389834	0.0178894	0.411562	0.0377584	-0.299206	0.00049931	0.00648874	-0.103628
FLORIO_NEOCORTEX_BASAL_RADIAL_GLIA_UP	0.0137079	0.0843819	6.24e-05	0.0153268	0.173187	2.43e-07	0.0147462	0.114477	0.00197213	1.55e-11	0.124015
FLOTHO_PEDIATRIC_ALL_THERAPY_RESPONSE_DN	0.0246034	0.149514	0.00149255	0.0218697	0.126891	0.0927428	0.0261615	0.201712	0.00085634	1.71e-05	0.159372
FLOTHO_PEDIATRIC_ALL_THERAPY_RESPONSE_UP	0.470483	-0.0111127	0.00032977	0.473246	-0.0089631	0.0593921	0.465613	-0.0114528	0.00415712	1.23e-05	-0.0105095
FONTAINE_FOLLICULAR_THYROID_ADENOMA_DN	0.142972	0.00573991	0.516001	0.140468	0.00973023	0.360945	0.136698	-0.0255671	0.0109521	0.0538167	-0.0033656
FONTAINE_FOLLICULAR_THYROID_ADENOMA_UP	0.0645769	0.0831574	4.37e-16	0.0651903	0.145931	2.41e-12	0.0652061	0.102665	1.4e-09	5.14e-33	0.110584
FONTAINE_PAPILLARY_THYROID_CARCINOMA_DN	0.0176288	0.165652	7.61e-08	0.0175212	0.0872165	0.0506467	0.0176049	0.107744	0.0189625	2.17e-08	0.120204
FONTAINE_PAPILLARY_THYROID_CARCINOMA_UP	0.119244	0.0204421	0.0131496	0.116172	-0.007627	0.602027	0.118038	0.0212757	0.0312782	0.0108402	0.0113636
FONTAINE_THYROID_TUMOR_UNCERTAIN_MALIGNANCY_DN	0.0759398	0.0755609	6.18e-09	0.0744766	0.0793876	7.49e-05	0.0732707	0.0743838	0.00081861	2.53e-13	0.0764441
FONTAINE_THYROID_TUMOR_UNCERTAIN_MALIGNANCY_UP	0.0311945	-0.0474383	0.0663464	0.0360312	-0.0290219	0.293139	0.0354766	0.0254868	0.994312	0.246171	-0.0169911
FORTSCHEGGER_PHF8_TARGETS_DN	0.0753415	0.00856765	0.0213172	0.0776316	0.0311291	0.00231098	0.0772531	0.0158197	0.0402164	0.00019882	0.0185055
FORTSCHEGGER_PHF8_TARGETS_UP	0.0534721	0.00188255	0.44202	0.0529475	0.0151878	0.466403	0.0541544	-0.0249478	0.136312	0.30775	-0.0026258
FOSTER_KDM1A_TARGETS_DN	0.0462345	-0.02093	0.0485931	0.0464481	0.00895274	0.724159	0.0468344	-0.0334005	0.0136813	0.0182049	-0.0151259
FOSTER_KDM1A_TARGETS_UP	0.0220509	0.0302505	0.0251901	0.0222206	-0.0216378	0.082419	0.0225601	0.0696109	0.0110542	0.00157751	0.0260745
FOSTER_TOLERANT_MACROPHAGE_DN	0.0511803	-0.0325268	0.232233	0.0544654	0.0124294	0.41366	0.0544135	0.0167793	0.265573	0.290787	-0.001106
FOSTER_TOLERANT_MACROPHAGE_UP	0.0494306	0.0168229	0.220896	0.0485942	-0.0080723	0.993852	0.0491303	0.0169265	0.182328	0.376123	0.00855905
FOURNIER_ACINAR_DEVELOPMENT_LATE_2	0.159379	-0.0247861	0.148255	0.160232	0.029959	0.438094	0.153331	-0.0971971	6.09e-07	6.46e-06	-0.0306747
FOURNIER_ACINAR_DEVELOPMENT_LATE_DN	0.146023	-0.0422958	0.00517307	0.149626	0	0.953407	0.14178	-0.100586	2.82e-06	2.55e-06	-0.0476271
FRASOR_RESPONSE_TO_ESTRADIOL_DN	0.0678824	0.0267898	0.263781	0.0728006	0.0915479	0.00085543	0.0714412	0.0550488	0.0269425	0.00051759	0.0577955
FRASOR_RESPONSE_TO_ESTRADIOL_UP	0.0554958	0.0101537	0.741583	0.0541221	-0.0391325	0.373004	0.0575105	-0.022792	0.475152	0.668758	-0.017257
FRASOR_RESPONSE_TO_SERM_OR_FULVESTRANT_DN	0.0548423	-0.163796	0.0794327	0.0539547	-0.0495733	0.836296	0.0496196	-0.448856	0.00011934	0.00064786	-0.220742
FRASOR_TAMOXIFEN_RESPONSE_UP	0.0586297	-0.0067992	0.962569	0.0567055	-0.130406	1.59e-05	0.0569023	-0.0824211	0.0100158	2.14e-05	-0.0732087
FRIDMAN_IMMORTALIZATION_DN	0.0734197	0.055459	0.037262	0.0721137	0.044146	0.357848	0.0760422	0.0958872	0.00096637	0.00097476	0.0651641
FRIDMAN_SENESCENCE_UP	0.119043	0.00333966	0.817588	0.126189	0.0228563	0.324213	0.123655	0.0380311	0.00354187	0.0302942	0.021409
FUJII_YBX1_TARGETS_DN	0.0619641	-0.0684305	0.00242135	0.0615459	-0.0755451	0.0214569	0.0621021	-0.1547	1.28e-07	2.37e-09	-0.0995585
FUJII_YBX1_TARGETS_UP	0.0690316	0.0385676	0.0582532	0.068937	0.0279853	0.269254	0.0713374	0.0723276	0.0472842	0.0253454	0.0462935
FULCHER_INFLAMMATORY_RESPONSE_LECTIN_VS_LPS_DN	0.05413	0.00644939	0.878299	0.0577598	0.0248936	0.252977	0.056373	0.0408401	0.0237049	0.105382	0.024061
FULCHER_INFLAMMATORY_RESPONSE_LECTIN_VS_LPS_UP	0.0933338	-0.0008141	0.490297	0.0914271	-0.0090391	0.226299	0.0900219	-0.0027548	0.840411	0.576908	-0.0042027
FURUKAWA_DUSP6_TARGETS_PCI35_DN	0.0384861	-0.0091545	0.631548	0.0395287	0.0865535	0.445346	0.0352329	-0.283726	0.00130015	0.0147103	-0.0687758
FURUKAWA_DUSP6_TARGETS_PCI35_UP	0.0445571	0.00223974	0.787989	0.0459835	-0.0304313	0.207889	0.0447771	0.0481699	0.117221	0.245114	0.00665943
GABRIELY_MIR21_TARGETS	0.0431132	-0.0072383	0.469304	0.043893	-0.106342	0.00197559	0.04769	-0.0174457	0.307527	0.0121111	-0.0436754
GAJATE_RESPONSE_TO_TRABECTEDIN_UP	0.158352	0.0528933	4.29e-05	0.163363	0.115037	9.48e-07	0.16281	0.0897492	1.6e-07	5.35e-15	0.0858933
GAL_LEUKEMIC_STEM_CELL_DN	0.0418186	-0.011298	0.759028	0.0411234	-0.0489514	0.888887	0.0401873	-0.137627	9.64e-05	0.00371394	-0.0659587
GAL_LEUKEMIC_STEM_CELL_UP	0.0277345	0.0306177	0.470529	0.0287248	0.0351281	0.230661	0.0299127	0.0277187	0.295264	0.331976	0.0311548
GALE_APL_WITH_FLT3_MUTATED_UP	0.0434572	-0.0909908	0.00134914	0.0478898	0.00399744	0.920595	0.0466243	-0.0842152	0.00750188	0.00074235	-0.0570695
GALINDO_IMMUNE_RESPONSE_TO_ENTEROTOXIN	0.147136	-0.002772	0.636383	0.146163	-0.0147938	0.982206	0.147257	0.0620231	0.00057648	0.0145426	0.0148191
GALLUZZI_PERMEABILIZE_MITOCHONDRIA	0.148739	0.00564012	0.536452	0.146511	0.0189295	0.125031	0.138675	-0.0411882	0.0136813	0.0297773	-0.0055395
GARCIA_TARGETS_OF_FLI1_AND_DAX1_DN	0.0759775	-0.0715351	4.71e-07	0.0755119	-0.0539982	0.00409728	0.0758833	-0.0597409	0.00030983	2.54e-10	-0.0617581
GARCIA_TARGETS_OF_FLI1_AND_DAX1_UP	0.0405611	-0.0151421	0.0589912	0.0412585	-0.0071871	0.923754	0.0412823	0.0114004	0.952399	0.432564	-0.0036429
GARGALOVIC_RESPONSE_TO_OXIDIZED_PHOSPHOLIPIDS_BLACK_UP	0.0344559	0.0606921	0.303174	0.0394011	0.127895	0.0871697	0.0415188	0.187936	0.00718349	0.00878703	0.125508
GARGALOVIC_RESPONSE_TO_OXIDIZED_PHOSPHOLIPIDS_BLUE_DN	0.01065	-0.149322	0.00521366	0.011972	-0.236994	0.00258077	0.0112925	-0.198749	0.0110795	2.09e-05	-0.195022
GARGALOVIC_RESPONSE_TO_OXIDIZED_PHOSPHOLIPIDS_BLUE_UP	0.0695859	-0.0341767	0.0545475	0.0715419	0.00165918	0.913045	0.0739471	0.0185106	0.674959	0.341139	-0.0046689
GARGALOVIC_RESPONSE_TO_OXIDIZED_PHOSPHOLIPIDS_GREEN_DN	0.0384012	0.107982	0.00012123	0.0366473	0.0380484	0.54106	0.0394628	0.0509476	0.0886505	0.00049843	0.0656595
GARGALOVIC_RESPONSE_TO_OXIDIZED_PHOSPHOLIPIDS_GREEN_UP	0.0200278	-0.027222	0.910591	0.0244421	0.103332	0.208335	0.0217172	0.189287	0.0398438	0.134673	0.0884657
GARGALOVIC_RESPONSE_TO_OXIDIZED_PHOSPHOLIPIDS_GREY_DN	0.0324788	-0.106378	1.93e-05	0.0348267	-0.128594	0.00212372	0.0337585	-0.0632262	0.00992377	1.04e-07	-0.0993996
GARGALOVIC_RESPONSE_TO_OXIDIZED_PHOSPHOLIPIDS_MAGENTA_UP	0.160398	-0.0347338	0.0203831	0.170649	0	0.792534	0.167699	0.00177759	0.970613	0.216207	-0.0109854
GARGALOVIC_RESPONSE_TO_OXIDIZED_PHOSPHOLIPIDS_PINK_DN	0.0225612	0.156378	0.00022109	0.0234362	0.0488595	0.376548	0.0248315	0.098064	0.0165825	0.00014568	0.1011
GARGALOVIC_RESPONSE_TO_OXIDIZED_PHOSPHOLIPIDS_RED_DN	0.0273393	-0.176316	1.89e-06	0.0266777	-0.261092	3.98e-06	0.0240315	-0.270404	2.11e-05	1.11e-13	-0.235937
GARGALOVIC_RESPONSE_TO_OXIDIZED_PHOSPHOLIPIDS_TURQUOISE_DN	0.0275477	0.0428353	0.399867	0.0261391	0.051179	0.637709	0.0272884	-0.080691	0.238624	0.469605	0.00444111
GARGALOVIC_RESPONSE_TO_OXIDIZED_PHOSPHOLIPIDS_TURQUOISE_UP	0.0658544	-0.0570857	0.0598417	0.074857	-0.0033309	0.613521	0.0753761	0.0952576	0.0590375	0.0562431	0.0116137
GARGALOVIC_RESPONSE_TO_OXIDIZED_PHOSPHOLIPIDS_YELLOW_DN	0.0143101	-0.165234	0.134277	0.019198	-0.13156	0.247069	0.0171882	-0.372582	0.00160171	0.00315008	-0.223126
GARGALOVIC_RESPONSE_TO_OXIDIZED_PHOSPHOLIPIDS_YELLOW_UP	0.0303654	0.0761312	0.112205	0.0334634	0.0731957	0.0750305	0.0355682	0.168726	0.00409335	0.00220794	0.106018
GARY_CD5_TARGETS_DN	0.138684	-0.0467299	6.94e-05	0.136307	-0.0211418	0.840441	0.137814	-0.0613557	1.14e-06	1.99e-08	-0.0430758
GARY_CD5_TARGETS_UP	0.0913743	-0.0016499	0.679724	0.0906405	-0.0238567	0.21877	0.0939027	0.0257254	0.0231197	0.0782608	7.29e-05
GAURNIER_PSMD4_TARGETS	0.0259825	0.067605	0.114815	0.0246693	-0.0040151	0.99514	0.0261269	0.164714	1.55e-05	0.00018101	0.0761014
GAUSSMANN_MLL_AF4_FUSION_TARGETS_A_DN	0.0132	0.173301	0.00330147	0.0146588	0.159445	0.0234586	0.0152274	0.256618	1.24e-05	2.28e-07	0.196455
GAUSSMANN_MLL_AF4_FUSION_TARGETS_A_UP	0.042805	-0.006278	0.764752	0.045459	-0.0367482	0.205838	0.0463274	0.00696738	0.40839	0.482811	-0.0120196
GAUSSMANN_MLL_AF4_FUSION_TARGETS_B_UP	0.0146742	0.0713639	0.796249	0.0175921	-0.0502255	0.699289	0.0210906	0.0643946	0.533064	0.876295	0.028511
GAUSSMANN_MLL_AF4_FUSION_TARGETS_C_UP	0.0854732	0.0480251	2.72e-06	0.0837021	0.0234249	0.0591063	0.0845179	0.0164795	0.195838	5.28e-06	0.0293098
GAUSSMANN_MLL_AF4_FUSION_TARGETS_D_UP	0.0442403	0.343982	4.45e-23	0.0482561	0.603992	1.75e-36	0.0480343	0.412153	6.03e-20	7.54e-74	0.453376
GAUSSMANN_MLL_AF4_FUSION_TARGETS_E_UP	0.0457607	-0.0210789	0.267607	0.0483488	-0.0047343	0.576208	0.0466953	0.0137429	0.294528	0.402918	-0.0040234
GAUSSMANN_MLL_AF4_FUSION_TARGETS_F_DN	0.0105088	-0.0194521	0.55043	0.00989063	-0.167868	0.166413	0.0095974	-0.146034	0.0840523	0.136342	-0.111118
GAUSSMANN_MLL_AF4_FUSION_TARGETS_F_UP	0.0283748	-0.0364771	0.418082	0.0311315	-0.0013859	0.77726	0.0302447	0.125262	7.39e-05	0.00163802	0.0291331
GAUSSMANN_MLL_AF4_FUSION_TARGETS_G_DN	0.0408656	0.0806955	0.0001565	0.0427811	0.1033	0.103562	0.0458437	0.04805	0.144286	0.00022923	0.0773486
GAUSSMANN_MLL_AF4_FUSION_TARGETS_G_UP	0.0237212	-0.007416	0.569461	0.0248559	0.0270354	0.329538	0.0245339	-0.0235993	0.468038	0.561284	-0.0013266
GAVIN_FOXP3_TARGETS_CLUSTER_P2	0.0210079	0.136925	6.87e-05	0.0206705	0.0492253	0.224171	0.021809	0.0911479	0.00435474	1.03e-05	0.0924326
GAVIN_FOXP3_TARGETS_CLUSTER_P3	0.0417603	-0.0258195	0.391903	0.0426146	-0.0394461	0.047488	0.0418578	0.00172781	0.933082	0.2304	-0.0211793
GAVIN_FOXP3_TARGETS_CLUSTER_P4	0.0294594	0.13611	4.88e-07	0.0309953	0.207417	6.01e-07	0.0293095	0.156435	7.11e-10	2.71e-19	0.166654
GAVIN_FOXP3_TARGETS_CLUSTER_P6	0.0602005	-0.0663414	0.419808	0.0643722	0.0969485	0.255283	0.0599256	-0.20879	0.00106079	0.00583477	-0.0593941
GAVIN_FOXP3_TARGETS_CLUSTER_P7	0.0571731	0.10215	3.42e-06	0.0618629	0.181459	1.1e-08	0.0572708	0.0896949	5.48e-06	2.01e-16	0.124435
GAVIN_FOXP3_TARGETS_CLUSTER_T4	0.119717	0.00520185	0.348453	0.122315	0.0337369	0.0286973	0.118537	0.0175554	0.234442	0.0595269	0.0188314
GAVIN_FOXP3_TARGETS_CLUSTER_T7	0.254476	-0.0178189	0.00027273	0.250946	-0.0095137	0.794031	0.247427	-0.0117738	0.0115612	0.00024304	-0.0130354
GAVIN_PDE3B_TARGETS	0.0133023	0.174498	0.0657029	0.0118543	-0.318645	0.234321	0.0129993	0.422532	0.0344948	0.0196342	0.0927951
GAZDA_DIAMOND_BLACKFAN_ANEMIA_ERYTHROID_DN	0.0777389	0.0293881	1.95e-05	0.0781915	0.0297248	4.95e-06	0.0799924	0.0479994	1.86e-06	1.25e-13	0.0357041
GAZDA_DIAMOND_BLACKFAN_ANEMIA_ERYTHROID_UP	0.0225892	-0.0292857	0.728753	0.0249326	0.0286639	0.966199	0.0277119	0.0877293	0.983238	0.993695	0.0290358
GAZDA_DIAMOND_BLACKFAN_ANEMIA_MYELOID_DN	0.176573	-0.0091257	0.328278	0.181665	0.00141031	0.794031	0.176484	-0.0035324	0.904331	0.8225	-0.0037493
GAZDA_DIAMOND_BLACKFAN_ANEMIA_MYELOID_UP	0.0218162	-0.238058	9.28e-10	0.0244768	-0.20738	0.00022151	0.0231288	-0.207139	0.00310232	4.13e-13	-0.217526
GAZDA_DIAMOND_BLACKFAN_ANEMIA_PROGENITOR_DN	0.120708	-0.0147933	0.295371	0.120708	0.0188985	0.857731	0.118044	-0.081805	0.00013982	0.00225863	-0.0258999
GAZDA_DIAMOND_BLACKFAN_ANEMIA_PROGENITOR_UP	0.112883	-0.0221098	0.0316382	0.113012	0.00027446	0.887971	0.108934	-0.0283656	0.15098	0.0907025	-0.0167337
GAZIN_EPIGENETIC_SILENCING_BY_KRAS	0.0238264	-0.160948	0.00998375	0.0266047	-0.22916	0.0105945	0.0272614	-0.217164	0.015458	0.00016855	-0.202424
GEISS_RESPONSE_TO_DSRNA_UP	0.121383	-0.004699	0.673273	0.123464	0.00809005	0.991338	0.119454	0.0474942	0.00964982	0.120903	0.0169618
GENTILE_RESPONSE_CLUSTER_D3	0.0707653	-0.0034135	0.96605	0.0730175	0.00866664	0.675326	0.0723469	-0.0066705	0.866848	0.979745	-0.0004725
GENTILE_UV_HIGH_DOSE_DN	0.0837338	-0.0344177	0.00586805	0.0867783	-0.011323	0.729476	0.084484	-0.0363992	0.00892094	0.00240265	-0.02738
GENTILE_UV_LOW_DOSE_DN	0.0379391	-0.0403771	0.737706	0.0402238	-0.104812	0.019734	0.0418305	-0.0214545	0.576488	0.144406	-0.0555478
GENTILE_UV_LOW_DOSE_UP	0.0757716	-0.0772777	0.00342045	0.076987	-0.0291117	0.519708	0.0802025	-0.0238785	0.60001	0.0333403	-0.0434226
GENTILE_UV_RESPONSE_CLUSTER_D2	0.0650156	-0.0393389	0.198262	0.0660228	-0.0487945	0.195017	0.0620038	-0.0806484	0.01989	0.026053	-0.0562606
GENTILE_UV_RESPONSE_CLUSTER_D4	0.0562374	-0.115452	9.9e-09	0.0641895	-0.0457763	0.0532446	0.0579358	-0.213639	7.26e-11	4e-17	-0.124955
GENTILE_UV_RESPONSE_CLUSTER_D5	0.0843639	-0.0331273	0.0656002	0.0838664	0.0140409	0.735387	0.0839476	-0.0017438	0.703859	0.343087	-0.0069434
GENTILE_UV_RESPONSE_CLUSTER_D6	0.0614043	0.0155489	0.357982	0.0612893	-0.025354	0.233731	0.060234	-0.0012507	0.609843	0.428722	-0.0036852
GENTILE_UV_RESPONSE_CLUSTER_D7	0.0960504	-0.0506471	0.00561625	0.0994416	0.00324444	0.952472	0.0966494	-0.0354797	0.485464	0.0640789	-0.0276275
GENTILE_UV_RESPONSE_CLUSTER_D8	0.108191	0.0186505	0.168695	0.109142	0.0355128	0.103006	0.109111	0.00041436	0.894194	0.214982	0.0181925
GENTILE_UV_RESPONSE_CLUSTER_D9	0.0973323	-0.0152667	0.704361	0.106869	0.0735748	0.140147	0.106324	-0.0289173	0.0849931	0.144378	0.0097969
GENTLES_LEUKEMIC_STEM_CELL_UP	0	NA	0.200869	0	NA	0.193837	0	NA	0.0634917	0.0618491	NA
GEORGES_CELL_CYCLE_MIR192_TARGETS	0.078553	-0.0218442	0.194826	0.0822348	0.0242622	0.909653	0.0810178	-0.0623261	0.0526699	0.154926	-0.0199694
GEORGES_TARGETS_OF_MIR192_AND_MIR215	0.0532393	-0.0196448	0.0196691	0.0552588	-0.0047522	0.488166	0.0554163	-0.0352445	0.012653	0.00615437	-0.0198805
GERHOLD_ADIPOGENESIS_DN	0.277395	0.00417662	0.200173	0.276946	0.0279274	0.0104707	0.269777	0.0133815	0.0259641	0.00321202	0.0151618
GERHOLD_ADIPOGENESIS_UP	0.157775	-0.0178615	0.0147174	0.154462	-0.0689432	2.38e-06	0.149421	-0.044454	0.0171111	1.48e-07	-0.0437529
GERY_CEBP_TARGETS	0.058769	0.0327861	0.470287	0.0587884	0.00995303	0.831452	0.0608618	0.129898	0.00056348	0.00988672	0.0575458
GESERICK_TERT_TARGETS_DN	0.168283	0.00781658	0.746907	0.161817	-0.0651616	0.104791	0.15887	0.0569202	0.427537	0.340258	-0.0001416
GHANDHI_BYSTANDER_IRRADIATION_UP	0.0209606	-0.017135	0.621363	0.020917	-0.0646201	0.407585	0.0229206	0.0919672	0.116352	0.316342	0.00340402
GHANDHI_DIRECT_IRRADIATION_DN	0	NA	0.640678	0	NA	0.558612	0.00196353	2.66025	0.0975141	0.348444	NA
GHANDHI_DIRECT_IRRADIATION_UP	0.0277049	-0.0152129	0.930031	0.0310888	0.128407	0.00014696	0.0319443	0.0988494	0.00346374	5.76e-05	0.0706812
GILDEA_METASTASIS	0.1313	0.0556282	0.0065375	0.123992	-0.0063146	0.813198	0.129112	0.0386987	0.200822	0.0333643	0.0293374
GINESTIER_BREAST_CANCER_20Q13_AMPLIFICATION_DN	0.0584821	-0.0205809	0.119233	0.0583549	-0.0179662	0.607449	0.059663	-0.0559034	0.00228999	0.0078928	-0.0314835
GINESTIER_BREAST_CANCER_20Q13_AMPLIFICATION_UP	0.0875637	-0.0355538	1.63e-05	0.0860318	-0.116462	5.85e-12	0.0848003	-0.0419175	0.00041118	4.1e-17	-0.0646446
GINESTIER_BREAST_CANCER_ZNF217_AMPLIFIED_DN	0.0535208	-0.0188179	0.175337	0.0540964	-0.0153751	0.267119	0.0561475	-0.0262139	0.0358542	0.0466862	-0.0201356
GINESTIER_BREAST_CANCER_ZNF217_AMPLIFIED_UP	0.052127	0.0423126	0.0356287	0.052372	-0.0193997	0.758412	0.0510687	-0.005879	0.873152	0.277602	0.00567798
GNATENKO_PLATELET_SIGNATURE	0.462031	0.00599557	0.28621	0.452529	0.00805607	0.286753	0.445468	-0.0083915	0.93525	0.526719	0.0018867
GOBERT_CORE_OLIGODENDROCYTE_DIFFERENTIATION	0.00468138	-0.715969	4.78e-07	0.00843717	-0.468808	3.72e-05	0.00953186	-0.225277	0.171554	1.16e-09	-0.470018
GOBERT_OLIGODENDROCYTE_DIFFERENTIATION_DN	0.0565119	0.0068269	0.232197	0.0591346	-0.001272	0.992885	0.0592374	0.0569675	9.86e-05	0.00156516	0.0208408
GOBERT_OLIGODENDROCYTE_DIFFERENTIATION_UP	0.0604831	-0.0670203	0.0970658	0.0619765	0.0579015	0.829813	0.0592224	-0.251192	0.00031465	0.00171282	-0.0867702
GOLDRATH_ANTIGEN_RESPONSE	0.139558	0.00419332	0.200173	0.140073	0.0223661	0.051137	0.135762	-0.0376729	0.0236079	0.0106343	-0.0037045
GOLDRATH_HOMEOSTATIC_PROLIFERATION	0.174616	0.00421749	0.918372	0.171223	0.0337651	0.0515369	0.16594	-0.0321361	0.00161758	0.00424053	0.00194882
GOLDRATH_IMMUNE_MEMORY	0.0376258	0.166053	8.31e-13	0.0383892	0.191117	4.59e-06	0.0384063	0.263934	5.94e-15	6.18e-29	0.207034
GOTTWEIN_TARGETS_OF_KSHV_MIR_K12_11	0.0617255	-0.0348066	0.13829	0.0670999	0.0246481	0.387453	0.0673964	0.00902031	0.854914	0.404785	-0.0003794
GOTZMANN_EPITHELIAL_TO_MESENCHYMAL_TRANSITION_DN	0.157817	0.00446569	0.502144	0.155725	0.0103445	0.323156	0.155057	0.0190384	0.0889789	0.205282	0.0112829
GOTZMANN_EPITHELIAL_TO_MESENCHYMAL_TRANSITION_UP	0.107048	0.00944575	0.311742	0.108664	-0.0060772	0.895108	0.110155	0.0374889	0.155627	0.393275	0.0136192
GOZGIT_ESR1_TARGETS_DN	0.0446429	0.0480584	0.00156961	0.0470603	0.0489003	0.117189	0.0475019	0.116175	2.01e-08	1.38e-09	0.0710445
GOZGIT_ESR1_TARGETS_UP	0.0439272	0.0578088	8.01e-06	0.0460432	0.124469	5.4e-08	0.0440012	0.0347653	0.0032664	8.75e-13	0.0723478
GRABARCZYK_BCL11B_TARGETS_DN	0.0637539	0.061072	7.85e-08	0.060428	0.0539319	0.00910444	0.0613619	0.0836073	3.75e-05	1.39e-11	0.0662037
GRABARCZYK_BCL11B_TARGETS_UP	0.103447	0.0058469	0.418984	0.106248	-0.0049456	0.641937	0.104537	-0.0215328	0.172016	0.406958	-0.0068771
GRADE_COLON_AND_RECTAL_CANCER_DN	0.0180106	0.16762	6.02e-10	0.018381	0.164766	2.08e-05	0.0182246	0.205549	5.61e-09	9.5e-20	0.179311
GRADE_COLON_AND_RECTAL_CANCER_UP	0.194078	-0.0385315	3.83e-07	0.188307	-0.0259731	0.00094801	0.185385	-0.0631394	5.25e-10	1.85e-16	-0.042548
GRADE_COLON_VS_RECTAL_CANCER_DN	0.0386246	-0.189516	4.31e-13	0.0376949	-0.232927	1.61e-14	0.0364453	-0.148702	1e-07	2.08e-30	-0.190382
GRADE_COLON_VS_RECTAL_CANCER_UP	0.0566503	-0.0047816	0.818448	0.0556891	-0.0342369	0.544825	0.0558562	-0.0482978	0.0902619	0.377265	-0.0291054
GRAESSMANN_APOPTOSIS_BY_DOXORUBICIN_DN	0.162643	-0.019913	0.00044404	0.16317	-0.0350731	2.81e-07	0.163581	-0.0311756	4.73e-07	4.34e-14	-0.0287206
GRAESSMANN_APOPTOSIS_BY_DOXORUBICIN_UP	0.0715495	0.007031	0.11228	0.072801	0.0196122	0.65011	0.0734246	0.042427	2.73e-07	3.5e-06	0.0230234
GRAESSMANN_APOPTOSIS_BY_SERUM_DEPRIVATION_DN	0.0584728	-0.0344699	0.0586306	0.0616401	-0.0047856	0.738043	0.0587027	-0.0390713	0.184229	0.139549	-0.0261089
GRAESSMANN_APOPTOSIS_BY_SERUM_DEPRIVATION_UP	0.0608064	-0.028892	8.92e-06	0.0608384	-0.0444816	7.73e-05	0.0618613	-0.0108329	0.156533	3.1e-08	-0.0280688
GRAESSMANN_RESPONSE_TO_MC_AND_DOXORUBICIN_DN	0.0882703	-0.0625828	2.12e-21	0.0888125	-0.0736999	2.84e-13	0.0893813	-0.0707489	1.42e-15	5.29e-45	-0.0690105
GRAESSMANN_RESPONSE_TO_MC_AND_DOXORUBICIN_UP	0.0438969	0.0175823	0.097914	0.043274	-0.0243233	0.112161	0.0448785	0.0621917	3.01e-06	5.51e-06	0.0184835
GRAESSMANN_RESPONSE_TO_MC_AND_SERUM_DEPRIVATION_DN	0.0730064	-0.018662	0.140335	0.0744048	-0.001417	0.778279	0.0737467	-0.0459266	0.00823034	0.0293179	-0.0220019
GRAESSMANN_RESPONSE_TO_MC_AND_SERUM_DEPRIVATION_UP	0.0419369	-0.0092388	0.958294	0.0419687	-0.014196	0.406113	0.0420273	0.0141428	0.18448	0.509943	-0.0030973
GRAHAM_CML_DIVIDING_VS_NORMAL_QUIESCENT_DN	0.0676101	0.00627496	0.956808	0.0692669	0.0103798	0.808143	0.0687613	0.0300512	0.116231	0.56727	0.0155686
GRAHAM_CML_DIVIDING_VS_NORMAL_QUIESCENT_UP	0.0945247	-0.0871835	0.0157868	0.0903514	-0.035634	0.399431	0.0840246	-0.284971	1.61e-08	2.93e-08	-0.135929
GRAHAM_CML_QUIESCENT_VS_NORMAL_DIVIDING_UP	0.0803714	0.0288186	0.414225	0.0843583	0.0385384	0.163197	0.0854701	0.0162184	0.29856	0.252674	0.0278585
GRAHAM_CML_QUIESCENT_VS_NORMAL_QUIESCENT_DN	0.0631898	0.0044773	0.642812	0.0684941	0.068722	0.170875	0.0666607	0.0573696	0.00803985	0.0289278	0.043523
GRAHAM_CML_QUIESCENT_VS_NORMAL_QUIESCENT_UP	0.0751908	-0.0284764	0.705456	0.0779601	0.0100135	0.539833	0.0734589	-0.142838	0.00018448	0.00395491	-0.0537669
GRAHAM_NORMAL_QUIESCENT_VS_NORMAL_DIVIDING_DN	0.0588521	-0.195808	0.00797871	0.0577887	-0.0053642	0.146147	0.0516619	-0.515294	2.35e-07	7.28e-08	-0.238822
GRAHAM_NORMAL_QUIESCENT_VS_NORMAL_DIVIDING_UP	0.0945725	-0.0061751	0.995244	0.0981134	0.0158583	0.59522	0.0999216	0.0255386	0.0452746	0.299467	0.0117406
GREENBAUM_E2A_TARGETS_UP	0.124385	-0.0395505	0.116766	0.12482	-0.0352879	0.413475	0.123812	-0.140943	8.45e-07	6.64e-06	-0.0719273
GREGORY_SYNTHETIC_LETHAL_WITH_IMATINIB	0.113498	0.0607896	5.68e-16	0.115199	0.0886448	2.21e-17	0.113672	0.0670739	7.88e-12	4.95e-40	0.0721694
GRESHOCK_CANCER_COPY_NUMBER_UP	0.0826378	-0.0060704	0.776182	0.0852532	0.0247611	0.500577	0.0853874	-0.00943	0.784616	0.882096	0.0030869
GROSS_ELK3_TARGETS_DN	0.11612	0.0539017	0.00986178	0.12079	0.0731947	0.00053101	0.113899	0.0528651	0.014583	1.16e-05	0.0599872
GROSS_ELK3_TARGETS_UP	0.133791	0.13771	1.52e-13	0.13499	0.205936	3.92e-17	0.126979	0.103632	4.35e-07	8.9e-33	0.149093
GROSS_HIF1A_TARGETS_DN	0.226382	-0.106258	4.76e-06	0.250034	0.00519773	0.745026	0.222881	-0.0740005	0.00145792	1.05e-06	-0.0583534
GROSS_HYPOXIA_VIA_ELK3_AND_HIF1A_DN	0.0671131	-0.0201559	0.0683824	0.0633831	-0.0157658	0.651119	0.064478	-0.0782273	0.00042757	0.00135047	-0.0380497
GROSS_HYPOXIA_VIA_ELK3_AND_HIF1A_UP	0.134307	-0.0398819	0.105521	0.144321	0.012791	0.984895	0.136998	0.00274271	0.99434	0.604077	-0.0081161
GROSS_HYPOXIA_VIA_ELK3_DN	0.101579	-0.0674451	0.00145857	0.104587	-0.066014	0.0219917	0.103836	-0.0334316	0.131361	0.00037912	-0.0556302
GROSS_HYPOXIA_VIA_ELK3_ONLY_DN	0.0546184	0.0717382	0.0045798	0.053719	0.0636161	0.157688	0.0528602	-0.0136457	0.369822	0.0115051	0.0405695
GROSS_HYPOXIA_VIA_ELK3_ONLY_UP	0.0565761	-0.13493	0.00012895	0.0568424	-0.137913	0.00127525	0.0571863	-0.11015	0.0662482	2.04e-06	-0.127664
GROSS_HYPOXIA_VIA_ELK3_UP	0.0917418	0.027965	0.223927	0.0892434	0.0366988	0.126806	0.0877335	-0.0515115	0.0126477	0.0145049	0.00438407
GROSS_HYPOXIA_VIA_HIF1A_DN	0.108271	-0.0073524	0.980035	0.113607	0.0319865	0.215324	0.105837	0.0276526	0.394134	0.547193	0.0174289
GROSS_HYPOXIA_VIA_HIF1A_UP	0.150806	-0.0312527	0.024408	0.145605	-0.0023483	0.879274	0.145472	-0.0843537	2.48e-05	6.37e-05	-0.0393182
GRUETZMANN_PANCREATIC_CANCER_DN	0.129695	0.0162585	0.0001699	0.129623	0.0109107	0.172689	0.131308	0.0101659	0.031128	0.00010192	0.012445
GRUETZMANN_PANCREATIC_CANCER_UP	0.17064	0.0105606	0.0175692	0.170084	0.0189226	0.0404279	0.167458	0.00011337	0.977378	0.0241026	0.00986552
GRYDER_PAX3FOXO1_ENHANCERS_IN_TADS	0.125916	-0.0101631	0.0451182	0.127245	0.0108845	0.0233668	0.126828	-0.0088093	0.0589278	0.00357838	-0.002696
GRYDER_PAX3FOXO1_ENHANCERS_KO_DOWN	0.0829666	0.021397	0.00042414	0.0831691	0.0304137	3.55e-05	0.0842443	0.0296102	0.00067184	3.51e-09	0.0271403
GRYDER_PAX3FOXO1_TOP_ENHANCERS	0.105119	-0.0105218	0.0253155	0.106989	0.017498	0.00963406	0.106299	-0.0096142	0.118253	0.0019062	-0.0008794
GU_PDEF_TARGETS_DN	0.0714845	0.220337	8e-10	0.0469797	-0.225501	0.00039095	0.0509782	-0.0291188	0.576915	8.32e-11	-0.0114274
GU_PDEF_TARGETS_UP	0.0462778	0.00700546	0.488085	0.0448963	-0.137321	0.00628453	0.0474872	0.0570208	0.148984	0.017487	-0.0244315
GUENTHER_GROWTH_SPHERICAL_VS_ADHERENT_DN	0.129118	0.0111556	0.598868	0.127606	-0.0189748	0.793628	0.127551	0.0336763	0.371505	0.74821	0.00861902
GUILLAUMOND_KLF10_TARGETS_DN	0.125508	0.0351933	0.0601327	0.124744	0.0670839	0.0207024	0.122987	0.0658893	0.00049931	7.3e-05	0.0560555
GUILLAUMOND_KLF10_TARGETS_UP	0.0292179	-0.0804578	0.00629135	0.0260069	-0.23171	1.37e-07	0.026943	-0.210455	0.00026655	1.04e-10	-0.174208
GUO_HEX_TARGETS_DN	0.0754245	-0.0375406	0.00258156	0.0731548	-0.029701	0.363177	0.0730525	-0.0215556	0.192917	0.00845582	-0.0295991
GUO_HEX_TARGETS_UP	0.0755991	-0.0285324	0.373716	0.0780664	-0.0258487	0.340694	0.0752734	-0.0654538	0.0862499	0.172285	-0.039945
GUO_TARGETS_OF_IRS1_AND_IRS2	0.0876364	-0.0327088	0.00265099	0.0854255	-0.0699617	2.23e-05	0.0854899	-0.0243948	0.0564513	7.05e-07	-0.0423551
GUTIERREZ_CHRONIC_LYMPHOCYTIC_LEUKEMIA_DN	0.0228384	-0.0145351	0.965776	0.0246815	-0.0049069	0.916238	0.0247095	0.085112	0.0729983	0.483969	0.02189
GUTIERREZ_MULTIPLE_MYELOMA_UP	0.278032	-0.0040703	0.730348	0.270145	0.00691266	0.652618	0.25792	-0.0241154	0.0472913	0.270122	-0.007091
GYORFFY_DOXORUBICIN_RESISTANCE	0.0580987	-0.0034698	0.988001	0.0604554	0.0285281	0.356874	0.0596591	0.0433212	0.505185	0.750536	0.0227932
GYORFFY_MITOXANTRONE_RESISTANCE	0.0179261	-0.163569	0.0510322	0.0218146	-0.108993	0.182899	0.0224872	-0.248052	0.00124229	0.0008922	-0.173538
HADDAD_B_LYMPHOCYTE_PROGENITOR	0.0468656	-0.0373049	0.0112886	0.0490919	-0.0256771	0.22418	0.0495258	-0.0140751	0.13014	0.0135577	-0.0256857
HADDAD_T_LYMPHOCYTE_AND_NK_PROGENITOR_DN	0.0409167	0.0566862	7.55e-05	0.0401032	0.0467674	0.0102812	0.0394637	0.046267	0.0175087	2.49e-06	0.0499069
HADDAD_T_LYMPHOCYTE_AND_NK_PROGENITOR_UP	0.0550654	-0.0075802	0.737706	0.0613472	0.0585704	0.0515369	0.0615272	0.0647596	0.0270588	0.0324495	0.0385833
HAHTOLA_MYCOSIS_FUNGOIDES_CD4_DN	0.173204	-0.0245741	0.00118839	0.16834	-0.0223179	0.0483367	0.168701	-0.0465199	1.31e-06	2.23e-08	-0.0311373
HAHTOLA_MYCOSIS_FUNGOIDES_CD4_UP	0.101765	-0.0336413	0.136398	0.0988639	-0.0749701	0.133161	0.103508	0.0568777	0.0876405	0.0448862	-0.0172446
HAHTOLA_MYCOSIS_FUNGOIDES_SKIN_DN	0.155497	-0.0514332	0.00138194	0.158343	-0.070892	0.00238315	0.159967	-0.0553335	0.0445431	2.06e-05	-0.0592196
HAHTOLA_MYCOSIS_FUNGOIDES_SKIN_UP	0.173807	0.0194072	1.43e-05	0.17081	0.0445618	7.72e-06	0.167337	0.0130362	0.106133	4.01e-09	0.0256684
HAHTOLA_SEZARY_SYNDROM_DN	0.0166421	0.036379	0.272644	0.0149348	-0.0127536	0.404396	0.0186312	0.161446	0.0016292	0.00840964	0.0616905
HAHTOLA_SEZARY_SYNDROM_UP	0.118644	-0.0325743	0.0363304	0.117468	-0.0268179	0.429904	0.114893	-0.0933411	3.05e-05	5.79e-05	-0.0509111
HALMOS_CEBPA_TARGETS_DN	0.0365793	0.161604	0.00371582	0.0343956	0.0274302	0.756179	0.0307909	0.135938	0.0634917	0.0083639	0.108324
HALMOS_CEBPA_TARGETS_UP	0.0276562	-0.0690078	0.117594	0.0333715	0.0326603	0.938984	0.0315822	0.0272367	0.866387	0.583642	-0.0030369
HAMAI_APOPTOSIS_VIA_TRAIL_DN	0.0406562	0.0161963	0.20153	0.0397055	0.0389178	0.134196	0.0392607	0.0404738	0.05939	0.045184	0.0318626
HAMAI_APOPTOSIS_VIA_TRAIL_UP	0.102695	-0.0264583	0.00040665	0.105913	-0.0394616	7.32e-05	0.104608	-0.0953946	2.44e-10	5.96e-15	-0.0537715
HAN_JNK_SINGALING_DN	0.105438	0.0311434	0.078638	0.100427	-0.0134893	0.741413	0.0962887	-0.0362125	0.335711	0.247995	-0.0061861
HAN_JNK_SINGALING_UP	0.0925741	0.0692315	0.0109843	0.101282	0.162753	6.08e-06	0.106785	0.18662	1.18e-08	5.03e-13	0.139535
HAN_SATB1_TARGETS_DN	0.0509326	0.0262367	0.0458351	0.0521896	0.022083	0.51594	0.0528923	0.0594122	7.9e-06	2.55e-05	0.0359106
HAN_SATB1_TARGETS_UP	0.050829	-0.0036376	0.689154	0.0529095	0.00569015	0.621835	0.0522963	0.0312982	0.0331714	0.203269	0.0111169
HANN_RESISTANCE_TO_BCL2_INHIBITOR_DN	0.0547365	-0.0595037	0.0398365	0.0530612	0.0278736	0.242636	0.0514875	-0.0295674	0.61979	0.115095	-0.0203991
HANN_RESISTANCE_TO_BCL2_INHIBITOR_UP	0.0545326	-0.0508069	0.17	0.0533428	-0.0122067	0.76506	0.0517705	-0.0269817	0.505275	0.488151	-0.0299984
HARRIS_BRAIN_CANCER_PROGENITORS	0.108346	0.135855	2.55e-21	0.109107	0.212536	2.64e-20	0.105432	0.0624633	2.63e-05	9.59e-42	0.136951
HARRIS_HYPOXIA	0.19618	-0.0151633	0.169773	0.198086	-0.0328482	0.262743	0.193973	-0.0341078	0.0297134	0.0392035	-0.0273731
HASLINGER_B_CLL_WITH_13Q14_DELETION	0.0774399	0.0809684	0.00662167	0.0810601	0.0580948	0.296148	0.0812791	0.127733	3.03e-05	9.27e-06	0.0889322
HASLINGER_B_CLL_WITH_17P13_DELETION	0.20132	0.0297472	0.00043718	0.194484	0.00425311	0.357046	0.19056	0.0175717	0.703859	0.00567681	0.0171906
HATADA_METHYLATED_IN_LUNG_CANCER_UP	0.0386436	0.0414412	4.59e-07	0.038063	0.0607427	5.91e-08	0.0380116	0.035188	0.0075552	1.42e-13	0.0457906
HECKER_IFNB1_TARGETS	0.0312937	-0.034966	0.44228	0.0320523	-0.048937	0.33984	0.0347896	0.0581989	0.0517064	0.1372	-0.008568
HEIDENBLAD_AMPLICON_12P11_12_UP	0.0709353	0.158726	9.93e-12	0.07116	0.281273	2.51e-17	0.0663238	0.0277875	0.0695469	3.92e-26	0.155929
HEIDENBLAD_AMPLICON_8Q24_DN	0.0870453	0.0140325	0.365995	0.0853976	0.0548006	0.00728666	0.0856597	0.102918	3.47e-05	1.37e-05	0.0572505
HEIDENBLAD_AMPLICON_8Q24_UP	0.0285776	-0.141395	2.96e-05	0.0297231	-0.179162	0.00221294	0.0316882	-0.116963	0.0105272	1.69e-07	-0.14584
HEIDENBLAD_AMPLIFIED_IN_PANCREATIC_CANCER	0.0365144	-0.0851556	0.00057203	0.0361703	-0.117794	0.00074472	0.038026	-0.0891033	0.00401449	3.85e-07	-0.097351
HELLEBREKERS_SILENCED_DURING_TUMOR_ANGIOGENESIS	0.0751452	0.0625252	0.00050536	0.0759163	0.0830369	0.00746567	0.0783221	0.127633	9.51e-07	1.34e-09	0.091065
HELLER_HDAC_TARGETS_DN	0.101847	-0.0231791	0.00126385	0.101581	0.00630433	0.815213	0.103349	-0.0235701	0.00588899	0.00051673	-0.0134817
HELLER_HDAC_TARGETS_SILENCED_BY_METHYLATION_DN	0.0797792	-0.0106541	0.121215	0.0799304	-0.0021497	0.885643	0.0812843	-0.0116687	0.324807	0.348274	-0.0081575
HELLER_HDAC_TARGETS_SILENCED_BY_METHYLATION_UP	0.0826884	0.0212746	0.01213	0.0841651	0.00892506	0.956858	0.0841147	0.061922	0.00037781	0.00039221	0.0307072
HELLER_HDAC_TARGETS_UP	0.0697076	0.021271	0.0569992	0.0709612	0.00982657	0.525346	0.0701713	0.0248168	0.0287008	0.0283402	0.0186381
HELLER_SILENCED_BY_METHYLATION_DN	0.073911	-0.0755903	4.19e-06	0.0766685	0.0060536	0.559146	0.0783354	-0.0396984	0.155778	4.59e-05	-0.0364117
HELLER_SILENCED_BY_METHYLATION_UP	0.0615254	0.0581384	6.83e-07	0.0611954	0.0436403	0.0719657	0.0614287	0.0642762	0.00113155	1.69e-08	0.0553516
HENDRICKS_SMARCA4_TARGETS_DN	0.0753916	0.0204107	0.169053	0.0788893	0.0792871	0.00044315	0.0798861	0.0657679	0.0222732	0.00017153	0.0551552
HENDRICKS_SMARCA4_TARGETS_UP	0.152282	-0.0019828	0.845389	0.152321	-0.0102476	0.434967	0.155424	0.00519306	0.632784	0.819296	-0.0023458
HERNANDEZ_ABERRANT_MITOSIS_BY_DOCETACEL_2NM_DN	0.0819693	-0.0418363	0.00994101	0.0854423	0	0.781827	0.0864553	0.0279039	0.117836	0.029733	-0.0046442
HERNANDEZ_ABERRANT_MITOSIS_BY_DOCETACEL_2NM_UP	0.0402299	0.0988281	9.24e-07	0.0435676	0.158442	9.75e-09	0.0447723	0.212573	6.66e-09	8.17e-20	0.156615
HERNANDEZ_MITOTIC_ARREST_BY_DOCETAXEL_1_DN	0.106716	0.0429968	0.00895788	0.103819	0.0484562	0.00974915	0.101904	-0.0096773	0.632861	0.00325289	0.0272585
HERNANDEZ_MITOTIC_ARREST_BY_DOCETAXEL_1_UP	0.14702	0.12637	1.35e-15	0.147879	0.140031	3.55e-08	0.14341	0.141897	1.07e-14	1.84e-33	0.136099
HERNANDEZ_MITOTIC_ARREST_BY_DOCETAXEL_2_UP	0.0812026	-0.0331551	0.0562278	0.0873761	0.0340963	0.153936	0.0855248	0.0178143	0.133498	0.0353972	0.00625182
HESS_TARGETS_OF_HOXA9_AND_MEIS1_DN	0.0599474	0.0745014	0.00130039	0.0640382	0.103774	0.00109536	0.0632725	0.189558	6.18e-10	5.61e-13	0.122611
HESS_TARGETS_OF_HOXA9_AND_MEIS1_UP	0.155234	-0.0413466	0.00360026	0.147563	-0.0296083	0.421654	0.143158	-0.159358	9.04e-09	4.65e-09	-0.076771
HILLION_HMGA1_TARGETS	0.267153	0.0142469	0.00067629	0.265682	0.0340548	9.33e-10	0.260753	0.0153984	0.00343822	1.31e-12	0.0212334
HILLION_HMGA1B_TARGETS	0.326353	0.00788023	0.0205863	0.322417	0.0206754	0.00024207	0.31357	0.0161359	0.00210336	1.97e-06	0.0148972
HINATA_NFKB_TARGETS_FIBROBLAST_UP	0.133218	-0.0003898	0.866441	0.130304	-0.0113382	0.46212	0.131275	0.0197381	0.176777	0.506408	0.00267001
HINATA_NFKB_TARGETS_KERATINOCYTE_UP	0.103628	0.0186704	0.038697	0.101583	0.0682153	0.0627013	0.103078	0.0840589	3.5e-06	1.63e-06	0.0569815
HIRSCH_CELLULAR_TRANSFORMATION_SIGNATURE_DN	0.111936	0.0466823	2.09e-08	0.113261	0.0800179	4.21e-08	0.112059	0.0100344	0.319337	1.91e-13	0.0455782
HIRSCH_CELLULAR_TRANSFORMATION_SIGNATURE_UP	0.0699239	0.0213546	0.0246576	0.0705087	0.047579	0.00728666	0.0702858	0.0652491	7.19e-07	3.66e-08	0.0447276
HOEBEKE_LYMPHOID_STEM_CELL_DN	0.147961	0.0235405	0.00012088	0.148372	0.0349003	0.00193157	0.14557	0.0201604	0.0098499	5.03e-07	0.0262004
HOEBEKE_LYMPHOID_STEM_CELL_UP	0.0884232	-0.03306	0.0725699	0.0904481	-0.0392445	0.0695357	0.0883285	-0.0628115	0.00182249	0.00073424	-0.0450387
HOEGERKORP_CD44_TARGETS_DIRECT_UP	0.00157572	Inf	0.0975846	0.00752484	2.58496	0.00063009	0.00964723	0.65139	0.0291184	0.00018225	Inf
HOELZEL_NF1_TARGETS_DN	0.0160243	0.0641309	0.0274735	0.0188957	0.100591	0.0206042	0.018195	0.152784	0.00054703	3.97e-05	0.105835
HOELZEL_NF1_TARGETS_UP	0.0501951	-0.0327236	0.256931	0.0558484	0.0353164	0.458794	0.0536302	0.0441967	0.041167	0.0995929	0.0155965
HOFFMANN_IMMATURE_TO_MATURE_B_LYMPHOCYTE_DN	0.107958	0.0617788	1.86e-09	0.104544	0.0642174	0.00455326	0.10444	0.0710733	3.97e-05	2.25e-13	0.0656899
HOFFMANN_IMMATURE_TO_MATURE_B_LYMPHOCYTE_UP	0.0298614	0.0211458	0.966193	0.0298021	-0.0368125	0.376186	0.0282913	-0.0025156	0.582795	0.795689	-0.0060608
HOFFMANN_LARGE_TO_SMALL_PRE_BII_LYMPHOCYTE_DN	0.0442367	-0.0032751	0.96903	0.0461343	0.0394412	0.0642722	0.0475356	0.0733483	0.00012408	0.00063403	0.0365048
HOFFMANN_LARGE_TO_SMALL_PRE_BII_LYMPHOCYTE_UP	0.114704	-0.067648	0.0905279	0.114018	0.0114044	0.898258	0.107164	-0.276182	9.66e-06	8.95e-05	-0.110809
HOFFMANN_PRE_BI_TO_LARGE_PRE_BII_LYMPHOCYTE_DN	0.0899425	0.0362623	0.0297212	0.0947723	0.0652168	0.00861727	0.0926006	0.0731988	0.00042937	1.6e-05	0.058226
HOFFMANN_PRE_BI_TO_LARGE_PRE_BII_LYMPHOCYTE_UP	0.0665822	-0.0061862	0.449085	0.0694842	-0.0396202	0.157988	0.0749884	0.029125	0.978441	0.501601	-0.0055605
HOFFMANN_SMALL_PRE_BII_TO_IMMATURE_B_LYMPHOCYTE_DN	0.036475	-0.104092	0.00258836	0.0407126	-0.0148613	0.675313	0.0352214	-0.219989	7.7e-06	2.47e-06	-0.11298
HOFFMANN_SMALL_PRE_BII_TO_IMMATURE_B_LYMPHOCYTE_UP	0.052496	0.0245413	0.144301	0.0519578	0.0288906	0.206318	0.0541049	0.0241193	0.75122	0.268857	0.0258504
HOFMANN_CELL_LYMPHOMA_DN	0.0598139	0.0581602	0.00483173	0.0553335	-0.0212546	0.78325	0.0565563	0.0239399	0.638282	0.0608262	0.0202819
HOFMANN_CELL_LYMPHOMA_UP	0.0880174	0.0246621	0.459516	0.0833596	0.00172237	0.566367	0.0807075	-0.0773005	0.0221117	0.11198	-0.016972
HOFMANN_MYELODYSPLASTIC_SYNDROM_LOW_RISK_DN	0.266316	0.0679162	7.37e-07	0.248408	0.0882448	1.68e-05	0.2435	0.0331012	0.0114152	6.63e-11	0.0630874
HOLLEMAN_ASPARAGINASE_RESISTANCE_ALL_DN	0.170425	-0.0147923	0.174916	0.167847	-0.041048	0.0413248	0.161388	-0.0367537	0.00755339	0.00322065	-0.0308647
HOLLEMAN_ASPARAGINASE_RESISTANCE_B_ALL_UP	0.485199	-0.0042494	0.240048	0.484071	0.00381929	0.209219	0.477857	-0.010788	0.0539911	0.0660964	-0.0037394
HOLLEMAN_VINCRISTINE_RESISTANCE_ALL_UP	0.0592829	0.00800703	0.588515	0.064257	0.0994093	0.00180272	0.0599785	0.0203469	0.311278	0.0135866	0.0425878
HOLLEMAN_VINCRISTINE_RESISTANCE_B_ALL_UP	0.0389786	-0.0345326	0.488353	0.042583	0.0762834	0.281721	0.0400751	-0.0214059	0.408418	0.450834	0.00678161
HOLLERN_EMT_BREAST_TUMOR_DN	0.00160058	-0.038819	0.87583	0.00229174	0.0703892	0.66045	0.00230629	0.148467	0.587198	0.904448	0.0600125
HOLLERN_EMT_BREAST_TUMOR_UP	0.0850199	0.0846213	3.06e-10	0.0842165	0.052611	0.010243	0.0835517	0.0947355	1.12e-05	2.66e-14	0.0773226
HOLLERN_MICROACINAR_BREAST_TUMOR_UP	0.00837146	1.05917	1.23e-06	0.00561301	0.150906	0.663387	0.00503633	0.194219	0.296393	3.19e-05	0.468098
HOLLERN_SOLID_NODULAR_BREAST_TUMOR_DN	0.111839	0.0709864	1.47e-05	0.104124	0.00418074	0.684077	0.103951	0.0347654	0.0657846	7.71e-05	0.0366442
HOLLERN_SQUAMOUS_BREAST_TUMOR	0.013824	-0.0402319	0.595137	0.0143688	-0.0450312	0.244935	0.0150706	0.0515948	0.46197	0.494119	-0.0112227
HOLLMANN_APOPTOSIS_VIA_CD40_DN	0.106409	0.0206158	0.00594557	0.107043	0.0155137	0.00396581	0.106915	0.03717	1.58e-07	1.39e-09	0.0244332
HOLLMANN_APOPTOSIS_VIA_CD40_UP	0.10691	-0.0105002	0.047446	0.10585	-0.0144547	0.168236	0.106395	-0.0075954	0.276862	0.057039	-0.0108501
HONMA_DOCETAXEL_RESISTANCE	0.417229	-0.0017065	0.836776	0.419343	0.0228052	0.00029603	0.416272	0.00889118	0.277807	0.00388883	0.00999666
HOOI_ST7_TARGETS_DN	0.0587732	0.0714357	1.28e-06	0.0597319	0.0724045	0.0001222	0.0606465	0.0952606	1.15e-08	1.59e-15	0.0797003
HOOI_ST7_TARGETS_UP	0.0398026	-0.0239823	0.227483	0.0398391	-0.0391798	0.27366	0.0415208	0.00604643	0.845687	0.435817	-0.0190386
HOQUE_METHYLATED_IN_CANCER	0.0415671	0.223658	5.52e-18	0.0401603	0.201425	3.3e-07	0.040277	0.167577	7.24e-07	3.21e-27	0.197553
HORIUCHI_WTAP_TARGETS_DN	0.123204	-0.0164206	0.436775	0.121086	0.0126622	0.792966	0.115264	-0.139076	2.35e-06	9.24e-05	-0.0476115
HORIUCHI_WTAP_TARGETS_UP	0.0213572	0.0106871	0.900207	0.0238207	0.00692669	0.45196	0.0239152	0.114844	0.00084431	0.0140108	0.0441525
HORTON_SREBF_TARGETS	0.015295	0.0524161	0.259563	0.0149558	0.275035	0.0151059	0.0173156	0.22855	0.0462106	0.00846757	0.185334
HOSHIDA_LIVER_CANCER_LATE_RECURRENCE_DN	0.0518828	-0.0820646	9.73e-05	0.0501036	-0.0485529	0.0214744	0.0494748	-0.0579934	0.0126996	4.53e-06	-0.0628703
HOSHIDA_LIVER_CANCER_LATE_RECURRENCE_UP	0.0775298	0.115417	6.18e-09	0.0823453	0.157664	2.05e-09	0.078623	0.139822	1.46e-09	3.35e-23	0.137634
HOSHIDA_LIVER_CANCER_SUBCLASS_S1	0.12081	0.0496129	1.37e-11	0.119355	0.0456633	8.02e-06	0.118278	0.0357336	9.32e-05	1.13e-17	0.0436699
HOSHIDA_LIVER_CANCER_SUBCLASS_S2	0.13972	-0.0372878	1.34e-06	0.141045	-0.0318105	0.00786886	0.138449	-0.0541616	1.18e-06	6.78e-12	-0.0410866
HOSHIDA_LIVER_CANCER_SUBCLASS_S3	0.0621196	0.0191181	0.0517703	0.0601281	-0.0011661	0.845893	0.061116	0.0699059	4.9e-05	0.00021307	0.029286
HOSHIDA_LIVER_CANCER_SURVIVAL_DN	0.0832344	-0.0052391	0.975357	0.0783017	-0.002787	0.998732	0.0762736	-0.026953	0.324923	0.890064	-0.0116597
HOSHIDA_LIVER_CANCER_SURVIVAL_UP	0.0783737	0.017091	0.225333	0.0822024	0.0233869	0.260174	0.0824303	0.0373749	0.0360779	0.055253	0.0259509
HOUSTIS_ROS	0.261112	-0.0032868	0.332677	0.252137	-0.0107206	0.274111	0.246996	-0.020722	0.0698664	0.120016	-0.0115765
HOWLIN_CITED1_TARGETS_1_DN	0.0458957	0.0590347	0.00908646	0.0529657	0.258703	1.18e-08	0.0504584	0.14046	0.00024039	1.35e-11	0.152733
HOWLIN_CITED1_TARGETS_1_UP	0.0285233	-0.0422775	0.119564	0.0336507	0.0108965	0.986093	0.0353978	0.0450714	0.538557	0.479821	0.00456346
HOWLIN_PUBERTAL_MAMMARY_GLAND	0.0612983	0.189377	3.14e-12	0.0646509	0.229767	5.64e-11	0.0603888	0.242364	3.71e-12	1.97e-30	0.220503
HSIAO_HOUSEKEEPING_GENES	0.50042	0.00240611	0.380756	0.493149	0.00406628	0.10327	0.486235	0.00203031	0.576915	0.271154	0.00283424
HSIAO_LIVER_SPECIFIC_GENES	0.0264471	-0.0264261	0.0139952	0.0264089	-0.0900291	7.87e-05	0.0257776	0.00369295	0.929752	0.00011256	-0.0375874
HU_ANGIOGENESIS_DN	0.238833	-0.0145853	0.398716	0.234918	0.0324183	0.0278365	0.228943	-0.0258789	0.113179	0.0376708	-0.002682
HU_GENOTOXIC_DAMAGE_24HR	0.198812	-0.0191033	0.119564	0.194375	-0.0164844	0.444327	0.1967	-0.0228293	0.0325145	0.0476633	-0.0194723
HU_GENOTOXIC_DAMAGE_4HR	0.0924675	-0.0055358	0.993485	0.0927638	-0.0119294	0.852007	0.0952621	-0.0891601	0.00989218	0.144187	-0.0355418
HU_GENOTOXIN_ACTION_DIRECT_VS_INDIRECT_24HR	0.201384	-0.015364	0.0666766	0.193799	-0.0409816	0.00046402	0.192178	-0.0445441	4.27e-05	3.04e-07	-0.0336299
HU_GENOTOXIN_ACTION_DIRECT_VS_INDIRECT_4HR	0.127677	-0.0140496	0.329265	0.118123	-0.0805828	0.00093505	0.116893	-0.0307491	0.190408	0.00341308	-0.0417938
HUANG_DASATINIB_RESISTANCE_DN	0.0298574	-0.0167246	0.569499	0.0313329	-0.0005087	0.998732	0.0323497	0.0118781	0.228975	0.666282	-0.0017851
HUANG_DASATINIB_SENSITIVITY_UP	0.0625738	-0.0354236	0.178112	0.0705853	0.023751	0.491146	0.0697373	0.0836999	1.75e-05	0.00015911	0.0240091
HUANG_FOXA2_TARGETS_DN	0.111911	0.0682625	6.12e-06	0.108306	0.0692758	7.1e-05	0.111702	0.0958203	3.93e-06	1.05e-12	0.0777862
HUANG_FOXA2_TARGETS_UP	0.0181264	-0.0060634	0.906792	0.0168456	-0.174921	0.167944	0.0208577	0.0135576	0.885565	0.675731	-0.0558087
HUANG_GATA2_TARGETS_DN	0.058961	-0.0910053	1.27e-08	0.0614992	-0.0749307	0.0766638	0.0654652	-0.0607011	0.00513451	1.83e-09	-0.0755457
HUANG_GATA2_TARGETS_UP	0.13747	0.0297372	0.00240457	0.138183	0.0247122	0.00775907	0.135337	0.0674874	3.63e-09	3.33e-11	0.0406456
HUMMEL_BURKITTS_LYMPHOMA_UP	0.0759376	-0.0281543	0.0602904	0.0817045	0.0269975	0.883098	0.0767132	-0.0317386	0.0519313	0.0670253	-0.0109651
HUMMERICH_SKIN_CANCER_PROGRESSION_DN	0.0948057	0.0392667	2.75e-05	0.0935902	0.039057	0.00842917	0.0915109	0.0257783	0.0255985	1.18e-06	0.0347007
HUMMERICH_SKIN_CANCER_PROGRESSION_UP	0.161947	0.0401182	9.11e-06	0.162213	0.0635853	8.18e-07	0.160267	0.0477675	9.74e-05	4.67e-13	0.0504903
HUNSBERGER_EXERCISE_REGULATED_GENES	0.129802	0.0519307	7.02e-05	0.123994	-0.0141048	0.463909	0.129632	0.0763914	0.00920236	3.86e-05	0.0380724
HUPER_BREAST_BASAL_VS_LUMINAL_DN	0.105273	0.0247383	0.041633	0.0936604	-0.0793085	0.00022328	0.0957894	0.0121876	0.594686	0.00047751	-0.0141275
HUPER_BREAST_BASAL_VS_LUMINAL_UP	0.0265079	-0.184802	4.66e-08	0.0267178	-0.248342	3.23e-06	0.0267451	-0.234366	1.03e-09	2.03e-19	-0.222503
HUTTMANN_B_CLL_POOR_SURVIVAL_DN	0.0199389	-0.030519	0.650964	0.0239405	0.03693	0.398151	0.0259	0.0463102	0.142321	0.359448	0.0175737
HUTTMANN_B_CLL_POOR_SURVIVAL_UP	0.0710436	0.0114722	0.553987	0.0714034	0.00751365	0.684895	0.0729219	0.0814037	4.02e-08	2.76e-06	0.0334632
HWANG_PROSTATE_CANCER_MARKERS	0.305575	-0.0152392	0.303174	0.30118	-0.0313096	0.0750305	0.299838	-0.0075735	0.961355	0.265247	-0.0180408
ICHIBA_GRAFT_VERSUS_HOST_DISEASE_35D_DN	0.0294442	0.00716368	0.968367	0.03228	-0.0561099	0.395805	0.0306352	0.0540371	0.14525	0.448681	0.00169698
ICHIBA_GRAFT_VERSUS_HOST_DISEASE_35D_UP	0.0614328	-0.0103916	0.966244	0.066194	0.0387625	0.0117021	0.0648348	0.0203254	0.0151199	0.00808544	0.0162321
ICHIBA_GRAFT_VERSUS_HOST_DISEASE_D7_DN	0.0472516	-0.0289493	0.302533	0.047327	-0.001967	0.458794	0.0470364	-0.0948412	0.00017241	0.00163322	-0.0419192
ICHIBA_GRAFT_VERSUS_HOST_DISEASE_D7_UP	0.0526129	-0.009038	0.845389	0.0541519	-0.0290149	0.344958	0.0566497	0.0813234	0.00705416	0.0541493	0.0144235
IGARASHI_ATF4_TARGETS_DN	0.0547661	-0.0563395	0.00204024	0.0560194	-0.0178084	0.687734	0.057237	-0.0478749	0.182839	0.0111469	-0.0406743
IGLESIAS_E2F_TARGETS_UP	0.247837	0.021958	9.22e-06	0.246523	0.0236691	0.00218995	0.242072	0.0212573	0.0190287	9.9e-08	0.0222948
IIZUKA_LIVER_CANCER_PROGRESSION_G1_G2_DN	0.149174	-0.0150423	0.301072	0.146903	-0.0124031	0.618168	0.154115	0.00179612	0.433806	0.539573	-0.0085497
IIZUKA_LIVER_CANCER_PROGRESSION_G2_G3_UP	0.140004	0.00508196	0.4376	0.128004	0.0139391	0.693647	0.120911	-0.0020175	0.949973	0.869906	0.00566787
IKEDA_MIR1_TARGETS_UP	0.162058	0.00632147	0.497187	0.164116	0.0235637	0.417276	0.156011	-0.0145905	0.392608	0.541829	0.00509824
IKEDA_MIR133_TARGETS_UP	0.134119	0.0163915	0.0773399	0.13706	0.0599026	0.0513268	0.129995	-0.033772	0.113634	0.0173119	0.014174
IKEDA_MIR30_TARGETS_UP	0.0793359	-0.0373383	0.0799609	0.0820521	-0.0733741	0.0438787	0.0819535	-0.0661519	0.0118299	0.00257298	-0.0589548
INGRAM_SHH_TARGETS_DN	0.0583412	0.0493489	0.00044658	0.0576177	0.0417518	0.173829	0.0566571	0.027373	0.0986661	0.00062928	0.0394912
INGRAM_SHH_TARGETS_UP	0.0517376	0.0941627	4.56e-07	0.0541632	0.116051	7.4e-05	0.0526672	0.0799151	0.00108486	1.87e-11	0.0967097
IRITANI_MAD1_TARGETS_DN	0.298505	-0.0552555	2.15e-07	0.291448	-0.0440783	0.0270577	0.294392	-0.0600454	6.88e-09	3.01e-14	-0.0531264
ISHIDA_E2F_TARGETS	0.0505995	-0.251038	0.00840335	0.0493871	-0.116413	0.207007	0.0416295	-0.877676	1.68e-06	6.25e-07	-0.415042
ISSAEVA_MLL2_TARGETS	0.0771955	-0.0028648	0.893923	0.075789	-0.0111538	0.468758	0.0732124	-0.01666	0.396879	0.732246	-0.0102262
IVANOVA_HEMATOPOIESIS_EARLY_PROGENITOR	0.0681331	-0.0171515	0.239749	0.0680229	0.00225606	0.56598	0.069129	-0.0237504	0.023508	0.0742164	-0.0128819
IVANOVA_HEMATOPOIESIS_INTERMEDIATE_PROGENITOR	0.0919826	-0.0340988	0.00163452	0.0900615	-0.0018748	0.907719	0.0903124	-0.0229775	0.00897242	0.00100171	-0.0196503
IVANOVA_HEMATOPOIESIS_LATE_PROGENITOR	0.0717873	-0.0044425	0.491417	0.0712439	0.0172197	0.0281416	0.0715073	0.00344676	0.894548	0.186047	0.00540801
IVANOVA_HEMATOPOIESIS_MATURE_CELL	0.0470371	0.0236237	0.077086	0.0487846	0.0344426	0.147405	0.0475714	0.0215661	0.166335	0.050908	0.0265441
IVANOVA_HEMATOPOIESIS_STEM_CELL	0.0509111	-0.001843	0.639345	0.052394	-0.0382721	0.420703	0.0543999	0.0339915	0.322212	0.557819	-0.0020412
IVANOVA_HEMATOPOIESIS_STEM_CELL_AND_PROGENITOR	0.0461604	0.016458	0.0299732	0.046875	-0.0027793	0.793572	0.0478301	0.0175457	0.259182	0.117362	0.0104081
IVANOVA_HEMATOPOIESIS_STEM_CELL_LONG_TERM	0.0178693	-0.023764	0.498539	0.0197085	-0.0787957	0.00464831	0.0201527	-0.0432814	0.543231	0.0377311	-0.0486137
IVANOVSKA_MIR106B_TARGETS	0.0314202	-0.0486391	0.00519054	0.0333645	-0.0054488	0.891438	0.0338947	0.0158501	0.618202	0.0686728	-0.0127459
IWANAGA_CARCINOGENESIS_BY_KRAS_DN	0.063062	0.022	0.110176	0.0610987	-0.0410979	0.013895	0.06252	0.011291	0.616373	0.0304095	-0.0026023
IWANAGA_CARCINOGENESIS_BY_KRAS_PTEN_DN	0.0499	-0.0124395	0.391465	0.0506319	-0.0289281	0.125881	0.0502792	-0.0102299	0.570246	0.307742	-0.0171992
IWANAGA_CARCINOGENESIS_BY_KRAS_PTEN_UP	0.052201	-0.0708808	2.9e-12	0.0541358	-0.0759192	5.48e-09	0.0537937	-0.0669203	2.79e-08	9.09e-25	-0.0712401
IWANAGA_CARCINOGENESIS_BY_KRAS_UP	0.049827	0.00547764	0.301021	0.0515113	0.0302117	0.329118	0.0515038	0.00289424	0.912184	0.568709	0.0128612
IWANAGA_E2F1_TARGETS_INDUCED_BY_SERUM	0.0609544	-0.0946307	0.116912	0.0687205	0.115196	0.0294479	0.064331	-0.146295	0.0495961	0.00807748	-0.0419097
IZADPANAH_STEM_CELL_ADIPOSE_VS_BONE_DN	0.0268242	0.15168	3.94e-08	0.03002	0.20347	1.61e-06	0.0293319	0.0867317	0.00110575	5.11e-14	0.147294
IZADPANAH_STEM_CELL_ADIPOSE_VS_BONE_UP	0.0851996	-0.015634	0.302699	0.0873958	0.0220592	0.380865	0.0875996	0.0245519	0.240991	0.30571	0.0103257
JAATINEN_HEMATOPOIETIC_STEM_CELL_DN	0.0221534	0.0187237	0.978764	0.0250118	0.0787974	0.0720547	0.0241548	0.144927	9.24e-06	7.6e-05	0.0808158
JAATINEN_HEMATOPOIETIC_STEM_CELL_UP	0.0570501	0.0177897	0.00609743	0.0571458	0.0464416	7.91e-06	0.0570545	-0.0150694	0.248138	2.22e-06	0.0163873
JACKSON_DNMT1_TARGETS_UP	0.0938491	0.00965635	0.486122	0.100361	0.125376	4.88e-07	0.0980716	0.0738556	6.42e-06	6.07e-10	0.0696292
JAEGER_METASTASIS_DN	0.0322468	0.0307283	0.331676	0.0315712	-0.0533672	0.0584268	0.0323985	0.0224529	0.323542	0.118717	-6.2e-05
JAEGER_METASTASIS_UP	0.0898631	-0.0091391	0.40066	0.0860342	-0.070763	0.0920454	0.0849108	-0.112856	6.14e-05	0.00022294	-0.0642528
JAERVINEN_AMPLIFIED_IN_LARYNGEAL_CANCER	0.0994963	-0.0223597	0.331137	0.0952648	-0.021949	0.376116	0.0979891	-0.0116685	0.481976	0.466374	-0.0186591
JAIN_NFKB_SIGNALING	0.07139	-0.0809677	8.14e-08	0.0699396	-0.116302	5.74e-08	0.07142	-0.124217	8.56e-12	7.08e-23	-0.107162
JAZAERI_BREAST_CANCER_BRCA1_VS_BRCA2_DN	0.0708368	0.0644175	4.44e-06	0.0656264	0.0610518	0.00074472	0.069468	0.10798	1.7e-08	4.16e-14	0.0778163
JAZAERI_BREAST_CANCER_BRCA1_VS_BRCA2_UP	0.105563	2.87e-08	0.550891	0.10936	0.0332365	0.0482644	0.104394	-0.0089955	0.887173	0.277566	0.00808032
JAZAG_TGFB1_SIGNALING_DN	0.0638298	-0.0717048	0.00416179	0.0685742	0.0604165	0.384582	0.0646857	-0.0488006	0.0354025	0.00331973	-0.0200296
JAZAG_TGFB1_SIGNALING_UP	0.0481864	0.00791777	0.534615	0.0459275	0.00024	0.980866	0.0471926	0.0253431	0.333923	0.745998	0.011167
JAZAG_TGFB1_SIGNALING_VIA_SMAD4_DN	0.0455774	0.0187874	0.118032	0.0444312	-0.0051542	0.901691	0.0465514	0.0433549	0.101562	0.170524	0.018996
JAZAG_TGFB1_SIGNALING_VIA_SMAD4_UP	0.0733362	-0.0006621	0.867137	0.0736308	0.00810372	0.896709	0.0742705	-0.0102637	0.258784	0.782494	-0.0009407
JECHLINGER_EPITHELIAL_TO_MESENCHYMAL_TRANSITION_DN	0.0892136	0.103448	0.00038299	0.090104	0.0325128	0.61461	0.0905701	0.178733	2.27e-06	1.34e-07	0.104898
JECHLINGER_EPITHELIAL_TO_MESENCHYMAL_TRANSITION_UP	0.135267	0.0527738	4e-05	0.134325	0.116542	1.7e-11	0.134454	0.0722743	1.54e-05	1.15e-17	0.0805301
JEON_SMAD6_TARGETS_UP	0.140466	0.0467525	0.0187759	0.14838	0.108074	0.00039095	0.144305	0.0960532	8.74e-05	1.58e-07	0.0836265
JEPSEN_SMRT_TARGETS	0.12338	0.0181292	0.21077	0.121154	-0.0393558	0.613311	0.127867	0.0813027	2.73e-07	5.83e-06	0.0200254
JI_METASTASIS_REPRESSED_BY_STK11	0.0289095	0.0859593	0.066561	0.0404862	0.354083	1.82e-05	0.039618	0.393342	1.87e-07	1.03e-10	0.277795
JI_RESPONSE_TO_FSH_DN	0.150507	-0.0072224	0.724179	0.152746	-0.0195169	0.0798762	0.149135	-0.0558833	0.00152068	0.00474502	-0.0275408
JI_RESPONSE_TO_FSH_UP	0.0812721	0.031637	0.0258172	0.0800619	0.0301871	0.141694	0.0804543	0.0672416	9.18e-05	4.26e-05	0.0430219
JIANG_AGING_CEREBRAL_CORTEX_DN	0.270674	0.00163537	0.938401	0.26755	-0.0049964	0.895216	0.261831	-0.0202251	0.0197717	0.224124	-0.0078621
JIANG_AGING_CEREBRAL_CORTEX_UP	0.351572	0.00384981	0.569797	0.35175	0.012202	0.0383818	0.349306	-0.0160674	0.0292363	0.0226364	-5.21e-06
JIANG_AGING_HYPOTHALAMUS_DN	0.178665	0.054996	1.67e-07	0.178547	0.0747693	0.00023624	0.179042	0.0449146	0.0003717	7.91e-12	0.0582266
JIANG_AGING_HYPOTHALAMUS_UP	0.351638	0.0020982	0.835818	0.348827	0.0169306	0.0321356	0.337604	-0.0248962	0.0320823	0.0283972	-0.0019558
JIANG_HYPOXIA_CANCER	0.136157	0.0789441	6.01e-12	0.129073	0.089778	1.6e-07	0.131106	0.0641619	8.34e-06	1.18e-20	0.077628
JIANG_HYPOXIA_NORMAL	0.109089	-0.0055109	0.876793	0.1136	0.0340429	0.0192598	0.111056	0.00996838	0.341129	0.112058	0.0128335
JIANG_TIP30_TARGETS_UP	0.126234	0.0254603	0.0781462	0.135815	0.121904	1.94e-12	0.132649	0.0629849	0.00031233	3.53e-14	0.0701165
JIANG_VHL_TARGETS	0.114082	0.0104162	0.290256	0.113297	-0.0171632	0.290356	0.113484	0.0015887	0.828808	0.503125	-0.0017194
JINESH_BLEBBISHIELD_TO_IMMUNE_CELL_FUSION_PBSHMS_DN	0.0619163	0.028839	5.05e-05	0.0621365	0.0565525	0.00023002	0.0610679	0.0316405	0.0001459	6.7e-10	0.0390107
JINESH_BLEBBISHIELD_TO_IMMUNE_CELL_FUSION_PBSHMS_UP	0.0900947	-0.0194971	0.0248171	0.0927809	-0.013628	0.4657	0.0903521	-0.0119556	0.317965	0.0820268	-0.0150269
JINESH_BLEBBISHIELD_TRANSFORMED_STEM_CELL_SPHERES_DN	0.0800386	-5.96e-05	0.54905	0.0784843	-0.0191432	0.549228	0.0817352	0.0159064	0.319334	0.585374	-0.0010988
JINESH_BLEBBISHIELD_TRANSFORMED_STEM_CELL_SPHERES_UP	0.0881555	0.00241256	0.194469	0.0908653	0.0385987	0.00074472	0.0892404	0.022206	0.00342513	6e-05	0.0210724
JINESH_BLEBBISHIELD_VS_LIVE_CONTROL_DN	0.108635	0.0135732	0.00442664	0.108401	0.0114765	0.0529624	0.107739	0.0229552	0.00081133	2.59e-05	0.0160016
JINESH_BLEBBISHIELD_VS_LIVE_CONTROL_UP	0.0832162	0.0300401	9.39e-05	0.082339	0.0320489	0.00115456	0.0852953	0.0321289	0.00179776	5.33e-08	0.0314059
JISON_SICKLE_CELL_DISEASE_DN	0.267247	-0.019479	2.56e-10	0.266064	-0.0232637	4.88e-11	0.263551	-0.0229278	4.69e-10	1.36e-26	-0.0218902
JISON_SICKLE_CELL_DISEASE_UP	0.142008	0.0247595	1.84e-05	0.140846	0.04048	0.00151456	0.139379	0.0528109	3.16e-08	5.61e-13	0.0393501
JOHANSSON_BRAIN_CANCER_EARLY_VS_LATE_DN	0.142084	0.0565443	4.47e-05	0.139961	0.0659617	9.64e-05	0.144199	0.0816281	6.15e-06	1.38e-11	0.0680447
JOHANSSON_GLIOMAGENESIS_BY_PDGFB_UP	0.29058	0.00416459	0.581227	0.289499	0.0113238	0.186101	0.283739	-0.0187004	0.141451	0.212912	-0.0010707
JOHNSTONE_PARVB_TARGETS_1_DN	0.0771655	0.0240445	0.257259	0.0805733	0.0479101	0.0789088	0.0796961	0.014981	0.466061	0.156306	0.0289785
JOHNSTONE_PARVB_TARGETS_2_DN	0.0818229	0.00255607	0.626698	0.0849077	0.0440568	0.00010143	0.0840184	-0.0109969	0.838199	0.00315696	0.011872
JOHNSTONE_PARVB_TARGETS_2_UP	0.184876	0.0272955	1.91e-07	0.180249	-0.0037682	0.405637	0.18347	0.0323213	4.98e-07	1.97e-11	0.0186162
JOHNSTONE_PARVB_TARGETS_3_DN	0.112902	-0.0305629	0.0396019	0.113847	0.00660062	0.956858	0.112339	-0.0886772	1.65e-07	1.24e-06	-0.0375465
JOHNSTONE_PARVB_TARGETS_3_UP	0.108474	0.0174489	0.0841157	0.109302	0.00362374	0.879115	0.11013	0.0691049	3.57e-06	3.45e-05	0.0300592
JOSEPH_RESPONSE_TO_SODIUM_BUTYRATE_DN	0.110978	-0.0070886	0.390672	0.10641	-0.0288252	0.157333	0.105655	-0.0574852	0.00028347	0.00125439	-0.031133
JOSEPH_RESPONSE_TO_SODIUM_BUTYRATE_UP	0.231706	0.0376946	1.1e-05	0.23558	0.0154334	0.115241	0.228263	0.0382709	0.0160816	3.58e-06	0.0304663
KAAB_FAILED_HEART_ATRIUM_DN	0.200528	0.0288352	4.33e-15	0.196773	0.0369951	3.05e-09	0.192255	0.0164269	0.0105561	2.37e-22	0.0274191
KAAB_FAILED_HEART_ATRIUM_UP	0.0447424	0.150832	0.00024642	0.0431074	0.118749	0.0642482	0.0453691	0.192521	0.00103466	2.94e-06	0.154034
KAAB_FAILED_HEART_VENTRICLE_DN	0.128767	0.0665977	2.44e-06	0.121904	-0.0133383	0.783134	0.124246	0.0556336	0.00301118	1.15e-06	0.0362977
KAAB_HEART_ATRIUM_VS_VENTRICLE_DN	0.0969324	-0.0098556	0.137301	0.0945847	-0.0123094	0.651119	0.0920876	-0.0282516	0.0458476	0.0885574	-0.0168055
KAAB_HEART_ATRIUM_VS_VENTRICLE_UP	0.0858674	0.0470036	0.00016083	0.0860541	0.0148005	0.194624	0.0859677	0.0739975	3.93e-10	6.72e-12	0.0452672
KAMIKUBO_MYELOID_CEBPA_NETWORK	0.0619082	0.0570349	0.00990652	0.0609504	-0.0020363	0.982996	0.0588412	0.121603	4.92e-08	1.21e-07	0.0588671
KAMMINGA_EZH2_TARGETS	0.0545575	-0.0798431	0.40312	0.0572548	-0.0354676	0.648289	0.0561352	-0.348452	4.17e-05	0.00084646	-0.154588
KAMMINGA_SENESCENCE	0.0661808	-0.0369778	0.120765	0.0636134	-0.0860658	0.0009023	0.0646206	-0.0566345	0.0138542	0.00015735	-0.0598927
KAN_RESPONSE_TO_ARSENIC_TRIOXIDE	0.0876544	-0.0042998	0.821485	0.0925052	0.0611608	9.31e-05	0.0927245	-0.003187	0.76553	0.00340947	0.0178913
KANG_DOXORUBICIN_RESISTANCE_UP	0.0471415	-0.288122	0.255671	0.0483398	0.018947	0.378174	0.0407854	-0.843031	3.63e-05	0.00032444	-0.370735
KANG_IMMORTALIZED_BY_TERT_DN	0.0243884	0.181558	2.6e-06	0.026186	0.200231	0.00023136	0.0261331	0.233046	3.55e-06	1.29e-12	0.204945
KANG_IMMORTALIZED_BY_TERT_UP	0.0746171	0.044078	0.00050844	0.0779085	0.109701	3.96e-11	0.0718389	0.00794988	0.890578	9.57e-12	0.0539098
KANNAN_TP53_TARGETS_DN	0.0873914	-0.0027771	0.455714	0.0838553	-0.0275464	0.233027	0.0806729	-0.130891	0.00118894	0.00634726	-0.0537381
KANNAN_TP53_TARGETS_UP	0.0438726	0.0387246	0.429541	0.0440719	0.0555219	0.382955	0.0426625	0.0494307	0.0313761	0.103921	0.0478924
KARLSSON_TGFB1_TARGETS_DN	0.120673	0.0351847	0.0190864	0.116913	0.00312044	0.439577	0.116405	0.0561283	9.62e-06	1.22e-05	0.0314778
KARLSSON_TGFB1_TARGETS_UP	0.257671	-0.0418296	0.00111791	0.257868	0.00129591	0.709697	0.252115	-0.069394	5.37e-05	6.9e-06	-0.0366426
KASLER_HDAC7_TARGETS_1_UP	0.0464757	0.0373806	0.00101512	0.045736	0.0643192	0.00748714	0.0464757	0.0361997	0.0334527	3.34e-05	0.0459665
KASLER_HDAC7_TARGETS_2_DN	0.100568	0.0732423	0.0413888	0.096157	0.0218079	0.793079	0.09326	0.0974206	0.0642369	0.0551288	0.0641569
KATSANOU_ELAVL1_TARGETS_DN	0.0273058	-0.110711	5.64e-07	0.026847	-0.220812	2.07e-12	0.0285055	-0.0888829	0.0020822	2.86e-18	-0.140136
KATSANOU_ELAVL1_TARGETS_UP	0.0443975	0.0618178	3.6e-08	0.0439433	0.0351692	0.0278643	0.0443998	0.102512	4.2e-09	3.55e-15	0.0664995
KAUFFMANN_DNA_REPAIR_GENES	0.0583258	-0.0486502	0.0156432	0.054559	-0.121157	0.00221058	0.0568831	-0.133877	6.42e-07	7.25e-09	-0.101228
KAUFFMANN_DNA_REPLICATION_GENES	0.0787119	-0.0130782	0.696155	0.0775173	-0.0288598	0.274502	0.0766466	-0.140897	8.97e-05	0.00123753	-0.0609451
KAUFFMANN_MELANOMA_RELAPSE_UP	0.0527743	-0.151665	0.0743804	0.054955	-0.060657	0.634141	0.0536392	-0.359743	1.1e-05	6.23e-05	-0.190688
KAYO_AGING_MUSCLE_DN	0.174483	-0.0077231	0.574265	0.171519	0.0183527	0.0143929	0.167385	-0.0036719	0.608216	0.102052	0.00231924
KAYO_AGING_MUSCLE_UP	0.0475469	-0.0248516	0.204635	0.0479693	-0.0146717	0.674736	0.049294	-0.0143392	0.42709	0.462163	-0.0179542
KAYO_CALORIE_RESTRICTION_MUSCLE_DN	0.126236	0.00054292	0.536679	0.121662	0.00360585	0.521123	0.120134	-0.007162	0.618202	0.742621	-0.0010044
KAYO_CALORIE_RESTRICTION_MUSCLE_UP	0.127665	0.0396316	0.00018702	0.12693	0.00917084	0.64029	0.126322	0.0476988	0.00647778	8.85e-05	0.0321671
KEGG_ABC_TRANSPORTERS	0	NA	0.105438	0	NA	0.929386	0	NA	0.15098	0.208463	NA
KEGG_ACUTE_MYELOID_LEUKEMIA	0.0641489	0.0481802	0.0336293	0.0596303	0.0307829	0.40035	0.0607964	0.0285817	0.220338	0.0704807	0.0358483
KEGG_ADHERENS_JUNCTION	0.104598	0.00663111	0.679009	0.10636	0.0285665	0.163031	0.105771	0.0287998	0.0806461	0.15044	0.0213325
KEGG_ADIPOCYTOKINE_SIGNALING_PATHWAY	0.0302976	0.0580638	0.0630282	0.0296402	0.0503142	0.58058	0.0284152	0.0936963	0.0502737	0.0499131	0.0673581
KEGG_ALANINE_ASPARTATE_AND_GLUTAMATE_METABOLISM	0.0408074	0.0359995	0.648423	0.037677	-0.008652	0.683221	0.0412465	-0.0206594	0.145912	0.484144	0.00222935
KEGG_ALDOSTERONE_REGULATED_SODIUM_REABSORPTION	0.023265	-0.0844339	0.124472	0.0231465	-0.146206	0.0843216	0.0264249	-0.0160841	0.769409	0.140755	-0.0822414
KEGG_ALLOGRAFT_REJECTION	0	NA	0.546794	0	NA	0.141521	0	NA	0.638102	0.421345	NA
KEGG_ALZHEIMERS_DISEASE	0.315695	0.0168032	0.00409772	0.316289	0.0317674	0.00075115	0.302223	0.0199313	0.0406323	1.79e-05	0.022834
KEGG_AMINO_SUGAR_AND_NUCLEOTIDE_SUGAR_METABOLISM	0.0507783	-0.060413	0.212364	0.0561288	0.00044654	0.910677	0.0574752	-0.0102111	0.974816	0.765508	-0.0233925
KEGG_AMINOACYL_TRNA_BIOSYNTHESIS	0.0754175	-0.131222	2.75e-05	0.0814673	-0.0183049	0.524783	0.0875536	-0.155367	1.45e-05	5.66e-08	-0.101631
KEGG_AMYOTROPHIC_LATERAL_SCLEROSIS_ALS	0.0696078	0.00487834	0.863824	0.0672176	0.0174959	0.466403	0.0671933	-0.0129887	0.788474	0.890825	0.00312852
KEGG_ANTIGEN_PROCESSING_AND_PRESENTATION	0.154964	0.0262695	0.00365713	0.152364	0.0362842	0.00214859	0.152889	0.0352766	0.00171166	2.47e-06	0.0326101
KEGG_APOPTOSIS	0.0435979	0.0108145	0.550879	0.0423803	0.0174135	0.78081	0.0415864	0.00216777	0.66187	0.867044	0.0101319
KEGG_ARACHIDONIC_ACID_METABOLISM	0.0422869	-0.0060556	0.866865	0.042109	0.00771836	0.937805	0.039909	-0.0469455	0.0242267	0.248937	-0.0150943
KEGG_ARGININE_AND_PROLINE_METABOLISM	0.07645	0.0808154	1.86e-06	0.0723022	0.0843352	0.0411128	0.0754322	0.0706491	0.054149	8.54e-07	0.0785999
KEGG_ARRHYTHMOGENIC_RIGHT_VENTRICULAR_CARDIOMYOPATHY_ARVC	0.0812851	0.00208874	0.783256	0.0805913	-0.0382248	0.00724379	0.0811969	0.00156798	0.905739	0.103612	-0.0115227
KEGG_AUTOIMMUNE_THYROID_DISEASE	0	NA	0.631548	0	NA	0.205838	0	NA	0.608921	0.534532	NA
KEGG_AXON_GUIDANCE	0.0613912	0.036637	5.69e-05	0.0596546	0.0160886	0.156388	0.0604307	0.0477056	0.00469025	6.77e-06	0.0334771
KEGG_B_CELL_RECEPTOR_SIGNALING_PATHWAY	0.0966821	0.078127	1.57e-09	0.0914956	0.0841053	0.00021482	0.0931111	0.0995247	3.77e-07	1.26e-16	0.0872523
KEGG_BASAL_CELL_CARCINOMA	0.00368916	-0.354143	0.0171934	0.00514697	-0.42024	0.00418805	0.00566018	0.063958	0.693061	0.0029925	-0.236808
KEGG_BASAL_TRANSCRIPTION_FACTORS	0.0463924	-0.0340916	0.229298	0.0465034	0.0341275	0.110404	0.0472799	0.0294088	0.502335	0.189363	0.00981491
KEGG_BASE_EXCISION_REPAIR	0.0444722	-0.0784128	0.00021448	0.0454681	-0.0555775	0.37815	0.0463953	-0.0907046	0.00439333	4.49e-05	-0.0748983
KEGG_BETA_ALANINE_METABOLISM	0.0738196	0.0889033	0.00036652	0.0708224	0.0452949	0.398101	0.0697616	0.0284855	0.255543	0.00235596	0.0542279
KEGG_BLADDER_CANCER	0.0729174	0.00830003	0.881491	0.0681025	-0.0194758	0.343232	0.0682004	-0.0344157	0.045124	0.19813	-0.0151971
KEGG_BUTANOATE_METABOLISM	0.0439399	0.0274361	0.935967	0.0385006	-0.196848	1.51e-05	0.0401088	-0.0127034	0.964293	0.00102383	-0.0607052
KEGG_CALCIUM_SIGNALING_PATHWAY	0.0599736	-0.0056094	0.780978	0.0591957	-0.0029447	0.929386	0.0582914	-0.0244857	0.0568823	0.382579	-0.0110133
KEGG_CARDIAC_MUSCLE_CONTRACTION	0.310102	0.0173287	5.92e-05	0.310057	0.0359274	4.83e-06	0.300464	0.00403895	0.867449	6.64e-08	0.0190983
KEGG_CELL_ADHESION_MOLECULES_CAMS	0.0164267	0.0748368	0.00015859	0.0166946	0.090758	0.00230877	0.0173709	0.144361	5.64e-07	9.44e-11	0.103318
KEGG_CELL_CYCLE	0.0806049	-0.0039227	0.939719	0.0802964	-0.0102497	0.691605	0.0780478	-0.0784325	0.00055092	0.0144708	-0.0308683
KEGG_CHEMOKINE_SIGNALING_PATHWAY	0.0554	0.0226158	0.011283	0.0525436	0.0124715	0.45196	0.0520533	0.0322894	0.0593243	0.0126865	0.0224589
KEGG_CHRONIC_MYELOID_LEUKEMIA	0.068387	0.0774894	0.00012635	0.0614639	0.0125357	0.375334	0.0621729	0.0273552	0.0510898	0.0002363	0.0391267
KEGG_CITRATE_CYCLE_TCA_CYCLE	0.110523	-0.0636848	0.0029146	0.0996101	-0.110447	0.0004765	0.101952	-0.0598324	0.233098	4.13e-05	-0.077988
KEGG_COLORECTAL_CANCER	0.0955441	-8.88e-05	0.866865	0.093198	0.00803231	0.576175	0.0921514	0.00405618	0.850662	0.944198	0.00399989
KEGG_COMPLEMENT_AND_COAGULATION_CASCADES	0.00440435	-0.112873	0.231331	0.00330478	-0.188661	0.720284	0.00200474	0.226771	0.468038	0.530743	-0.024921
KEGG_CYSTEINE_AND_METHIONINE_METABOLISM	0.0808856	0.0267899	0.0170258	0.0826255	0.099707	1.33e-05	0.0834154	-0.0120266	0.519487	1.7e-05	0.0381568
KEGG_CYTOKINE_CYTOKINE_RECEPTOR_INTERACTION	0.00811036	-0.0854575	0.0602805	0.00824879	-0.214697	0.00173028	0.0087001	0.0434118	0.686803	0.0040178	-0.0855807
KEGG_CYTOSOLIC_DNA_SENSING_PATHWAY	0.0550107	-0.0295191	0.201287	0.0522896	-0.0282945	0.464586	0.0563001	0.0805199	0.0925846	0.147421	0.00756877
KEGG_DILATED_CARDIOMYOPATHY	0.105667	0.0458715	1.16e-10	0.103763	0.022631	0.0049942	0.10322	0.0213184	0.00099735	3.78e-13	0.0299403
KEGG_DNA_REPLICATION	0.0403929	-0.0520407	0.311513	0.0378226	-0.129511	0.282442	0.0402466	-0.103326	0.145016	0.189765	-0.0949592
KEGG_DRUG_METABOLISM_CYTOCHROME_P450	0.0351993	0.0756034	0.00826046	0.0337681	0.105855	0.0460097	0.0302923	0.206253	0.0001587	9.4e-06	0.129237
KEGG_DRUG_METABOLISM_OTHER_ENZYMES	0.0573938	-0.0134666	0.237963	0.0508215	-0.0357416	0.65291	0.0498725	-0.110014	0.0125066	0.0519473	-0.0530741
KEGG_ECM_RECEPTOR_INTERACTION	0.0545639	0.0643148	0.00818009	0.0569249	0.0612313	0.0405911	0.0559318	0.116603	1.5e-05	1.01e-06	0.0807164
KEGG_ENDOCYTOSIS	0.0525268	0.00409897	0.704361	0.0548525	-0.01336	0.528063	0.0550309	0.0096817	0.515874	0.770126	0.00014021
KEGG_ENDOMETRIAL_CANCER	0.0582143	0.0731736	0.00124299	0.0549709	0.027812	0.567478	0.0566035	0.067698	0.00982788	0.00057842	0.0562279
KEGG_EPITHELIAL_CELL_SIGNALING_IN_HELICOBACTER_PYLORI_INFECTION	0.102779	0.0445517	0.00149973	0.0990558	0.0486815	0.00041346	0.100197	0.0558781	0.00011045	2.04e-08	0.0497038
KEGG_ERBB_SIGNALING_PATHWAY	0.0495887	-0.0091242	0.267043	0.0498293	-0.0128026	0.956858	0.0508472	-0.0130679	0.86041	0.805124	-0.0116649
KEGG_ETHER_LIPID_METABOLISM	0.0600698	0.102718	4.32e-06	0.0568408	0.0650737	0.0295463	0.0586256	0.0938471	0.00073688	2.73e-08	0.0872129
KEGG_FATTY_ACID_METABOLISM	0.0546814	0.0496871	0.0901941	0.0504094	-0.0287489	0.511281	0.0502225	0.0893816	0.00641335	0.0124634	0.0367733
KEGG_FC_EPSILON_RI_SIGNALING_PATHWAY	0.0386873	0.054074	0.00124321	0.0364404	0.0828262	0.0177418	0.0366177	0.0261147	0.517166	0.00088003	0.0543383
KEGG_FC_GAMMA_R_MEDIATED_PHAGOCYTOSIS	0.0845138	0.00604725	0.631548	0.085709	0.036733	0.022125	0.0819046	0.0192532	0.13072	0.0496527	0.0206778
KEGG_FOCAL_ADHESION	0.0939417	0.0557684	9.35e-10	0.0942295	0.0925137	1.09e-06	0.0943254	0.0900065	7.76e-10	1.26e-21	0.0794295
KEGG_FRUCTOSE_AND_MANNOSE_METABOLISM	0.0799185	-0.037054	0.278538	0.0868248	0.0355023	0.234285	0.0842754	-0.0209527	0.0920101	0.115273	-0.0075014
KEGG_GALACTOSE_METABOLISM	0.0606788	-0.0622844	0.223051	0.0708637	0.0772023	0.324213	0.0645097	-0.0497123	0.502784	0.356562	-0.0115982
KEGG_GAP_JUNCTION	0.103829	-0.0095587	0.242203	0.100878	-0.0565295	0.00013877	0.101593	-0.0106854	0.409606	0.00103027	-0.0255912
KEGG_GLIOMA	0.0909177	0.0475384	0.00020442	0.0861987	0.0306108	0.107171	0.0863243	0.0205181	0.414173	0.00072597	0.0328891
KEGG_GLUTATHIONE_METABOLISM	0.100316	0.0236138	0.0968729	0.100826	0.0909154	0.00060832	0.0936882	0.0265693	0.104869	0.00052482	0.0470328
KEGG_GLYCEROLIPID_METABOLISM	0.0352651	0.128506	9.22e-06	0.0319992	0.0946767	0.00320408	0.0342228	0.149564	3.58e-06	5.04e-11	0.124249
KEGG_GLYCEROPHOSPHOLIPID_METABOLISM	0.00767648	0.0995357	0.131865	0.00924444	0.239773	0.0237271	0.0105021	0.187419	0.0896092	0.0119522	0.175576
KEGG_GLYCINE_SERINE_AND_THREONINE_METABOLISM	0.0332298	0.0316957	0.881093	0.0279844	0.0369939	0.491837	0.0319082	-0.0508382	0.315028	0.679033	0.00595045
KEGG_GLYCOLYSIS_GLUCONEOGENESIS	0.200729	-0.0135005	0.0859615	0.201275	-0.0026094	0.881971	0.194957	-0.0340274	0.00214867	0.00778056	-0.0167124
KEGG_GLYCOSAMINOGLYCAN_BIOSYNTHESIS_HEPARAN_SULFATE	0.00062302	-2.24998	0.0169929	0.00343504	-0.89743	0.021974	0.00670169	0.486877	0.314636	0.00599098	-0.886844
KEGG_GLYCOSYLPHOSPHATIDYLINOSITOL_GPI_ANCHOR_BIOSYNTHESIS	0	NA	0.227514	0	NA	0.0927663	0.00120944	2.03562	0.546222	0.177789	NA
KEGG_GNRH_SIGNALING_PATHWAY	0.0811077	0.0206954	0.0374589	0.080131	0.0318267	0.0105549	0.0801622	0.0233866	0.0802083	0.00206166	0.0253029
KEGG_HEDGEHOG_SIGNALING_PATHWAY	0.0156377	-0.121788	0.0045839	0.0175174	-0.15307	0.00716685	0.0174688	-0.0382984	0.274549	0.00072231	-0.104386
KEGG_HEMATOPOIETIC_CELL_LINEAGE	0.0166594	-0.0838383	0.00739943	0.0175477	-0.0470964	0.623368	0.0164374	-0.0456144	0.61671	0.0684009	-0.0588497
KEGG_HISTIDINE_METABOLISM	0.0243626	0.0270935	0.759913	0.02017	-0.330011	0.00042604	0.0218414	0.0340813	0.888442	0.0121946	-0.089612
KEGG_HOMOLOGOUS_RECOMBINATION	0.0243484	-0.109071	0.00190632	0.024136	-0.0854695	0.151935	0.0222663	-0.0663631	0.433806	0.00632257	-0.086968
KEGG_HUNTINGTONS_DISEASE	0.323263	0.0153257	0.0496831	0.321737	0.0281605	0.0238798	0.307075	0.0048083	0.607246	0.0247927	0.0160982
KEGG_HYPERTROPHIC_CARDIOMYOPATHY_HCM	0.100128	0.0506524	8.23e-11	0.0979798	0.0256595	0.00389468	0.0979592	0.0241242	0.00303382	6.16e-13	0.0334787
KEGG_INOSITOL_PHOSPHATE_METABOLISM	0.0331399	0.0667721	0.00123633	0.0339925	0.116645	0.00253025	0.0322736	0.026051	0.158542	6e-05	0.0698227
KEGG_INSULIN_SIGNALING_PATHWAY	0.074056	0.0136492	0.0978997	0.0747474	0.0536627	2.74e-05	0.0729259	0.00047573	0.784299	0.00020936	0.0225959
KEGG_INTESTINAL_IMMUNE_NETWORK_FOR_IGA_PRODUCTION	0	NA	0.0327808	0	NA	0.0214325	0	NA	0.0169767	0.0009136	NA
KEGG_JAK_STAT_SIGNALING_PATHWAY	0.0187271	0.0848743	0.00412828	0.020648	0.178475	3.05e-06	0.0206386	0.124398	8.65e-05	4.44e-10	0.129249
KEGG_LEISHMANIA_INFECTION	0.0637001	0.0451316	0.00454047	0.0624906	0.0505785	0.181498	0.0655752	0.127859	1.31e-06	2.53e-07	0.0745231
KEGG_LEUKOCYTE_TRANSENDOTHELIAL_MIGRATION	0.105776	0.0367301	1.65e-05	0.100386	0.0242276	0.00609662	0.0992117	0.0326406	0.0170719	3.86e-07	0.0311994
KEGG_LONG_TERM_DEPRESSION	0.0883058	0.0927631	1.35e-15	0.0832041	0.0607712	0.00099535	0.0833764	0.0515845	0.0206921	2.95e-17	0.0683729
KEGG_LONG_TERM_POTENTIATION	0.102566	0.0534696	2.12e-06	0.0974438	0.0276382	0.067385	0.095858	0.00702489	0.304033	7.02e-06	0.0293776
KEGG_LYSINE_DEGRADATION	0.0515832	-0.049913	0.0124246	0.0485811	-0.216963	1.6e-06	0.0531983	-0.0756825	0.00777577	4.32e-08	-0.114186
KEGG_LYSOSOME	0.0478044	0.0477599	0.0081721	0.0482459	0.0687032	0.026028	0.0493744	0.093963	4.17e-05	1.7e-06	0.070142
KEGG_MAPK_SIGNALING_PATHWAY	0.0544695	0.01934	0.0133989	0.0536602	0.0145794	0.663387	0.0546827	0.0698993	0.00053917	0.00042299	0.0346062
KEGG_MELANOGENESIS	0.0621222	0.0308721	0.0287025	0.0593769	-0.0205369	0.613691	0.0592321	-0.0018649	0.74042	0.192443	0.00282344
KEGG_MELANOMA	0.0580055	0.090495	6.68e-06	0.0541255	0.0576286	0.255994	0.0544901	0.0603778	0.050576	1.29e-05	0.0695005
KEGG_METABOLISM_OF_XENOBIOTICS_BY_CYTOCHROME_P450	0.0346182	0.0825939	0.0132544	0.033725	0.136031	0.0214982	0.0295067	0.212779	0.00027508	1.19e-05	0.143801
KEGG_MISMATCH_REPAIR	0.03856	-0.147207	0.0114321	0.0366404	-0.209453	0.00960818	0.0392504	-0.134067	0.0164191	0.00018339	-0.163576
KEGG_MTOR_SIGNALING_PATHWAY	0.0867693	-0.0121948	0.282657	0.0867314	0.0152371	0.497651	0.0834207	-0.0462632	0.0876405	0.185631	-0.0144069
KEGG_N_GLYCAN_BIOSYNTHESIS	0.0596479	0.0507979	0.0192893	0.0580318	0.110438	0.00033528	0.0579821	0.101216	0.00500355	5.4e-06	0.0874839
KEGG_NATURAL_KILLER_CELL_MEDIATED_CYTOTOXICITY	0.0255857	0.0433147	0.0219202	0.0251846	0.0449093	0.76506	0.0258203	0.0110355	0.642394	0.170154	0.0330865
KEGG_NEUROACTIVE_LIGAND_RECEPTOR_INTERACTION	0.00689263	-0.0081476	0.482719	0.00685917	-0.016328	0.294639	0.00688148	0.0105606	0.188475	0.299376	-0.0046383
KEGG_NEUROTROPHIN_SIGNALING_PATHWAY	0.129703	0.037881	6.02e-09	0.121948	0.019867	0.00765879	0.120681	0.0169311	0.11608	1.95e-09	0.024893
KEGG_NICOTINATE_AND_NICOTINAMIDE_METABOLISM	0.0202006	0.0254963	0.852846	0.0241854	0.219642	0.0616123	0.0185698	0.0180415	0.930035	0.419035	0.0877266
KEGG_NOD_LIKE_RECEPTOR_SIGNALING_PATHWAY	0.0638665	0.00638189	0.818448	0.0607657	-0.0268461	0.193806	0.0635296	0.0312508	0.0747306	0.18101	0.00359555
KEGG_NON_SMALL_CELL_LUNG_CANCER	0.0529019	0.0479941	0.026313	0.0510309	0.0979517	0.0231385	0.0491878	-0.0157406	0.726544	0.0170522	0.0434017
KEGG_NOTCH_SIGNALING_PATHWAY	0.0290934	0.0241742	0.726677	0.0340149	0.0562071	0.356734	0.033682	0.00067901	0.721684	0.763491	0.0270201
KEGG_NUCLEOTIDE_EXCISION_REPAIR	0.060235	0.0450338	0.600326	0.0618903	0.07494	0.0574308	0.0598879	0.00795471	0.735839	0.289825	0.0426428
KEGG_O_GLYCAN_BIOSYNTHESIS	0	NA	0.107571	0	NA	7.32e-05	0	NA	0.280196	0.00021818	NA
KEGG_OLFACTORY_TRANSDUCTION	0.0395743	0.0434339	1.08e-06	0.0388906	0.0666112	0.00018759	0.0394376	0.0380125	0.00492447	4.09e-10	0.0493525
KEGG_OOCYTE_MEIOSIS	0.10919	0.0355883	0.0008717	0.108522	0.0272573	0.198928	0.104842	-0.0072619	0.392623	0.00385519	0.0185279
KEGG_OXIDATIVE_PHOSPHORYLATION	0.440422	0.0225017	0.00090538	0.439827	0.0412723	0.00027839	0.422286	0.0200781	0.0301018	1.48e-06	0.0279507
KEGG_P53_SIGNALING_PATHWAY	0.056252	0.0161197	0.656367	0.0547704	0.045843	0.321346	0.053804	-0.0284262	0.256108	0.441712	0.0111789
KEGG_PANCREATIC_CANCER	0.072017	-0.0119209	0.840202	0.0671997	-0.0504223	0.058263	0.067242	-0.0065654	0.669597	0.336284	-0.0229695
KEGG_PARKINSONS_DISEASE	0.466991	0.0106208	0.12653	0.464889	0.0245716	0.0173435	0.444844	-0.0001493	0.894246	0.0523223	0.011681
KEGG_PATHOGENIC_ESCHERICHIA_COLI_INFECTION	0.288754	0.00441324	0.467149	0.280991	-0.0138539	0.104791	0.277318	-0.0051473	0.596826	0.314782	-0.0048627
KEGG_PATHWAYS_IN_CANCER	0.073433	0.0106813	0.0447	0.0721385	0.00225747	0.985121	0.0717201	0.018614	0.209201	0.153588	0.0105176
KEGG_PENTOSE_PHOSPHATE_PATHWAY	0.117345	-0.0364857	0.088655	0.117385	0.0136141	0.631327	0.112896	-0.0275763	0.298157	0.224781	-0.016816
KEGG_PEROXISOME	0.0374096	0.023243	0.0787466	0.03703	0.0313966	0.329933	0.0377228	0.117535	4.21e-07	2.05e-06	0.0573916
KEGG_PHOSPHATIDYLINOSITOL_SIGNALING_SYSTEM	0.0334793	0.0633749	0.00019069	0.0339068	0.0359347	0.0642722	0.0338338	0.0525167	0.00411421	8.02e-06	0.0506088
KEGG_PORPHYRIN_AND_CHLOROPHYLL_METABOLISM	0.0770501	-0.0273556	0.00053636	0.0768142	-0.0744992	0.00016059	0.078997	-0.0382756	0.0270307	5.09e-07	-0.0467101
KEGG_PPAR_SIGNALING_PATHWAY	0.0516253	0.0525633	0.00016727	0.0547696	0.119361	9.68e-07	0.0513226	0.0639096	0.00130015	9.6e-11	0.0786112
KEGG_PRIMARY_IMMUNODEFICIENCY	0.00164182	Inf	0.0165521	0.00048811	Inf	0.0666339	0.00038827	Inf	0.371214	0.0160603	Inf
KEGG_PRION_DISEASES	0.0845572	-0.0170474	0.206461	0.0820386	-0.0918352	0.00624129	0.0841315	0.0305334	0.45311	0.0211163	-0.0261164
KEGG_PROGESTERONE_MEDIATED_OOCYTE_MATURATION	0.0518831	-0.0082096	0.449245	0.0502941	-0.0593464	0.0917428	0.048789	-0.0579186	0.00706617	0.012314	-0.0418249
KEGG_PROPANOATE_METABOLISM	0.0656609	-0.0199823	0.384601	0.0626617	-0.115923	0.00032207	0.0645963	-0.0165229	0.349871	0.00266586	-0.0508094
KEGG_PROSTATE_CANCER	0.0806567	0.0613565	5.53e-05	0.0751988	0.0159656	0.563773	0.0794545	0.0749124	7.47e-06	6.27e-08	0.0507449
KEGG_PROTEASOME	0.401266	-0.0276248	0.023881	0.386017	0.00192192	0.559982	0.37879	-0.0010727	0.790211	0.168034	-0.0089252
KEGG_PROTEIN_EXPORT	0.219447	0.0215674	0.035442	0.213875	0.0372374	0.0781019	0.211	-0.0032571	0.503714	0.0407044	0.0185159
KEGG_PURINE_METABOLISM	0.0676311	-0.0135327	0.453026	0.0676441	0.00011112	0.956789	0.0660208	-0.0153805	0.276859	0.644173	-0.0096007
KEGG_PYRIMIDINE_METABOLISM	0.0698965	-0.0140623	0.866865	0.0708228	-0.0101369	0.474338	0.0696629	-0.0162549	0.486461	0.780951	-0.0134847
KEGG_PYRUVATE_METABOLISM	0.131656	0.0564906	7.21e-07	0.121064	0.0133472	0.303323	0.125995	0.051192	0.00027135	1.79e-08	0.0403432
KEGG_REGULATION_OF_ACTIN_CYTOSKELETON	0.105864	0.0275068	5.54e-05	0.10184	0.00184279	0.273616	0.102992	0.0340333	0.0003014	9.35e-07	0.0211277
KEGG_RENAL_CELL_CARCINOMA	0.121798	0.0295519	0.00019918	0.117372	0.0208191	0.161796	0.112391	0.00271746	0.834755	0.00179954	0.0176961
KEGG_RETINOL_METABOLISM	0.017847	-0.0136752	0.985619	0.0162889	0.2726	0.0488013	0.0141076	0.0561194	0.446895	0.26251	0.105015
KEGG_RIBOSOME	0.839862	-0.0069319	5.36e-15	0.84311	-0.0061694	2.19e-05	0.836047	-0.0067515	1.22e-07	2.62e-23	-0.0066176
KEGG_RIG_I_LIKE_RECEPTOR_SIGNALING_PATHWAY	0.0376915	0.0308555	0.759028	0.0354776	0.0523845	0.59871	0.0385784	0.0866275	0.0362729	0.223066	0.0566225
KEGG_RNA_DEGRADATION	0.113822	-0.0349579	0.0123606	0.109781	-0.0389776	0.299614	0.109306	-0.12427	2.75e-08	2.94e-08	-0.0660685
KEGG_RNA_POLYMERASE	0.113304	0.0598164	0.0294334	0.108171	0.0394848	0.23875	0.109233	0.0402967	0.115279	0.0271006	0.0465326
KEGG_SELENOAMINO_ACID_METABOLISM	0.00860212	-0.0026941	0.662652	0.0105155	0.0957584	0.913312	0.00911664	-0.0573663	0.734683	0.951056	0.0118993
KEGG_SMALL_CELL_LUNG_CANCER	0.06535	0.0486652	0.00082169	0.0636284	0.0677019	0.0101568	0.0626873	0.0579103	0.0203943	2.35e-05	0.0580925
KEGG_SNARE_INTERACTIONS_IN_VESICULAR_TRANSPORT	0.0427538	0.139001	0.00036092	0.0412451	0.0101243	0.862856	0.0421215	0.199773	0.00073323	3.04e-05	0.1163
KEGG_SPHINGOLIPID_METABOLISM	0.00233526	-0.231326	0.680965	0.00377703	0.023459	0.630784	0.00371611	-0.18474	0.502475	0.800457	-0.130869
KEGG_SPLICEOSOME	0.210133	-0.0489082	0.00187751	0.205599	-0.0098958	0.52446	0.195533	-0.124936	3.45e-08	1.07e-08	-0.0612466
KEGG_STARCH_AND_SUCROSE_METABOLISM	0.0381346	-0.0650042	0.228622	0.0444699	-0.0791187	0.108439	0.0445925	-0.0818255	0.123257	0.0719842	-0.0753161
KEGG_SYSTEMIC_LUPUS_ERYTHEMATOSUS	0.0904236	-0.0532481	1.02e-06	0.0881452	-0.0509475	0.0112349	0.0859648	-0.101635	4.83e-10	4.59e-15	-0.0686102
KEGG_T_CELL_RECEPTOR_SIGNALING_PATHWAY	0.0669535	0.0760992	2.58e-07	0.0633295	0.0681117	0.00258077	0.0639553	0.0700223	0.00014543	4.64e-11	0.0714111
KEGG_TASTE_TRANSDUCTION	0.0695714	0.0205644	0.00627014	0.069756	0.0478786	0.00036668	0.068079	0.0121139	0.275166	7.41e-05	0.0268523
KEGG_TGF_BETA_SIGNALING_PATHWAY	0.0623308	0.0689819	0.00134185	0.060465	0.0194863	0.104536	0.0583559	0.0479158	0.00697151	0.00010814	0.0454613
KEGG_THYROID_CANCER	0.0987629	0.0263101	0.419808	0.0938173	0.0219554	0.739154	0.0965013	0.0116569	0.994312	0.884669	0.0199741
KEGG_TIGHT_JUNCTION	0.107979	0.0278691	0.00055222	0.103067	0.014886	0.105849	0.1015	0.0153095	0.110441	0.00054458	0.0193549
KEGG_TOLL_LIKE_RECEPTOR_SIGNALING_PATHWAY	0.061048	0.0540094	0.00111317	0.0591665	0.0517288	0.0106249	0.0608327	0.0867994	1.42e-05	4.64e-08	0.0641792
KEGG_TRYPTOPHAN_METABOLISM	0.0242723	-0.0196468	0.773898	0.0217874	-0.263769	5.76e-08	0.0232517	0.00413576	0.980775	7.06e-06	-0.0930934
KEGG_TYPE_I_DIABETES_MELLITUS	0.0527391	0.276814	1.17e-46	0.0524089	0.355471	8.04e-26	0.0534116	0.270186	2.38e-30	6.09e-97	0.300824
KEGG_TYPE_II_DIABETES_MELLITUS	0.0351994	-0.0378022	0.372908	0.0424528	0.0373793	0.226172	0.0395603	-0.0481955	0.249845	0.259375	-0.0162061
KEGG_TYROSINE_METABOLISM	0.0601492	0.0608013	0.00410894	0.0565175	0.0501803	0.0771808	0.0559306	0.00632211	0.557178	0.00830042	0.0391013
KEGG_UBIQUITIN_MEDIATED_PROTEOLYSIS	0.100216	0.0242872	0.00065198	0.0973949	0.0273711	0.026504	0.0937662	-0.0083618	0.374274	0.00054544	0.0144322
KEGG_VALINE_LEUCINE_AND_ISOLEUCINE_DEGRADATION	0.0397424	0.0115169	0.862646	0.0326527	-0.273142	6.03e-10	0.0353184	-0.0362775	0.72527	9.74e-08	-0.0993009
KEGG_VASCULAR_SMOOTH_MUSCLE_CONTRACTION	0.0762417	0.0483767	7.47e-11	0.0738551	0.0408912	0.00116622	0.0729187	0.0284209	0.0223954	1.19e-12	0.0392296
KEGG_VASOPRESSIN_REGULATED_WATER_REABSORPTION	0.0875134	0.0469732	0.00053909	0.0915806	0.0351963	0.15703	0.0911534	0.00734344	0.411608	0.00222813	0.0298377
KEGG_VEGF_SIGNALING_PATHWAY	0.0619087	0.0735737	5.08e-06	0.0581565	0.0564739	0.00346329	0.057731	0.0316935	0.268977	9.65e-07	0.0539137
KEGG_VIBRIO_CHOLERAE_INFECTION	0.173739	0.0605036	4.48e-13	0.172289	0.0834175	2.36e-13	0.171633	0.0709469	7.12e-11	2.52e-32	0.0716227
KEGG_VIRAL_MYOCARDITIS	0.0970477	-0.002553	0.729968	0.0994197	0.058021	0.00086759	0.0950263	-0.0487496	0.00623962	0.00035895	0.00223946
KEGG_WNT_SIGNALING_PATHWAY	0.061708	0.0309179	0.0142467	0.0613177	0.0494716	0.00451869	0.0621561	0.0315401	0.0607349	0.00035572	0.0373099
KENNY_CTNNB1_TARGETS_DN	0.142839	0.0321844	0.00034206	0.139308	0.00031486	0.876215	0.138207	0.0451669	0.0102181	0.00028878	0.0258887
KENNY_CTNNB1_TARGETS_UP	0.0941327	-0.055552	0.0376228	0.094898	0.0205338	0.778338	0.0908673	-0.142575	4.6e-06	1.91e-05	-0.0591979
KERLEY_RESPONSE_TO_CISPLATIN_UP	0.110992	0.0133037	0.0861626	0.116355	0.0643367	0.00129998	0.110799	0.056143	0.00196517	2.95e-05	0.0445945
KESHELAVA_MULTIPLE_DRUG_RESISTANCE	0.085345	0.0546596	3.4e-05	0.0866034	0.0862098	0.00071097	0.0837265	0.120261	4.83e-10	9.35e-15	0.0870434
KHETCHOUMIAN_TRIM24_TARGETS_UP	0.206247	-0.0111221	0.372908	0.21123	-0.0293611	0.294941	0.208702	0.00313971	0.630354	0.50128	-0.0124478
KIM_ALL_DISORDERS_CALB1_CORR_DN	0.0388781	0.0411149	8.31e-05	0.0390474	0.0183059	0.415057	0.0386627	0.0248995	0.225633	0.00063768	0.0281068
KIM_ALL_DISORDERS_CALB1_CORR_UP	0.177292	-0.0032785	0.545788	0.173724	0.00617016	0.777464	0.17143	-0.0094802	0.0457051	0.246607	-0.0021962
KIM_ALL_DISORDERS_DURATION_CORR_DN	0.217224	0.0236036	0.00852515	0.21337	0.050652	3.33e-05	0.205667	0.00542812	0.360863	1.5e-05	0.0265612
KIM_ALL_DISORDERS_OLIGODENDROCYTE_NUMBER_CORR_DN	0.0468879	-0.0309785	0.428295	0.050177	-0.0376705	0.0603266	0.0520207	-0.0620479	0.195231	0.102293	-0.0435656
KIM_ALL_DISORDERS_OLIGODENDROCYTE_NUMBER_CORR_UP	0.247138	0.00824391	0.00792071	0.241132	0.0114625	0.0143929	0.236432	0.00967775	0.0172206	0.00019727	0.00979473
KIM_BIPOLAR_DISORDER_OLIGODENDROCYTE_DENSITY_CORR_DN	0.00679542	-0.250564	0.0336293	0.00871866	-0.0374747	0.353461	0.0090898	-0.294464	0.00507271	0.00349235	-0.194167
KIM_BIPOLAR_DISORDER_OLIGODENDROCYTE_DENSITY_CORR_UP	0.264278	0.0102276	0.00238058	0.258295	0.0227611	0.00114348	0.253298	0.0101439	0.0322453	1.31e-05	0.0143775
KIM_GASTRIC_CANCER_CHEMOSENSITIVITY	0.0364498	0.0452058	0.00999027	0.0353723	0.0517456	0.145067	0.0351427	0.018778	0.271634	0.0155786	0.0385764
KIM_GERMINAL_CENTER_T_HELPER_UP	0.066058	-0.0058527	0.621511	0.0641016	-0.0248231	0.528377	0.0655785	-0.0455488	0.147392	0.4169	-0.0254082
KIM_GLIS2_TARGETS_UP	0.0938521	0.114754	6.36e-15	0.101185	0.246272	5.93e-25	0.0978542	0.130712	7.62e-11	1.83e-45	0.163913
KIM_LIVER_CANCER_POOR_SURVIVAL_DN	0.0081944	-0.280965	0.0510704	0.00697647	-0.702319	0.00045626	0.00895117	-0.139754	0.300018	0.00058255	-0.374346
KIM_LIVER_CANCER_POOR_SURVIVAL_UP	0.226239	-0.0167384	0.342563	0.229823	0.00779813	0.291003	0.224646	-0.0155445	0.0336115	0.0768488	-0.0081616
KIM_MYC_AMPLIFICATION_TARGETS_DN	0.0168318	-0.0298285	0.20823	0.0176832	-0.156525	0.00193423	0.0193811	0.0316861	0.592317	0.0105269	-0.0515559
KIM_MYC_AMPLIFICATION_TARGETS_UP	0.158089	-0.0219415	0.00200886	0.158072	-0.0188455	0.285338	0.158304	-0.0297103	0.00014544	1.25e-05	-0.0234991
KIM_MYCN_AMPLIFICATION_TARGETS_DN	0.0192618	-0.0413269	0.341684	0.0199944	-0.179594	0.00360515	0.0215954	0.0404301	0.658686	0.0271334	-0.0601636
KIM_MYCN_AMPLIFICATION_TARGETS_UP	0.0622412	0.0123236	0.0472048	0.0628174	0.0662741	0.00010171	0.0630657	0.0394392	0.0841684	5.01e-05	0.0393456
KIM_RESPONSE_TO_TSA_AND_DECITABINE_UP	0.0482059	0.0762116	1.97e-07	0.0512502	0.161636	2.89e-14	0.0477633	0.0676431	0.00027135	2.41e-21	0.10183
KIM_TIAL1_TARGETS	0.138974	-0.0449353	0.00183683	0.138909	-0.0577151	0.00100945	0.132989	-0.0669073	0.00017294	8.4e-08	-0.0565192
KIM_WT1_TARGETS_12HR_DN	0.136903	-0.0192445	0.0614302	0.139216	0.0574507	0.00081071	0.133938	-0.0208001	0.0756729	0.00034474	0.00580201
KIM_WT1_TARGETS_12HR_UP	0.0606526	0.0102403	0.557204	0.0610454	0.0104201	0.291003	0.0638157	0.0746957	0.00663645	0.0335622	0.0317854
KIM_WT1_TARGETS_8HR_DN	0.0862241	0.0165895	0.171058	0.0839796	0.0192504	0.199674	0.0825027	-0.0305883	0.0612248	0.0547989	0.00175056
KIM_WT1_TARGETS_8HR_UP	0.0912778	-0.0079808	0.756816	0.0929293	0.0164763	0.45385	0.0937148	0.021874	0.317562	0.618505	0.0101231
KIM_WT1_TARGETS_DN	0.0843143	-0.0007381	0.951343	0.0854921	0.0327793	0.0187369	0.0849312	-0.0287639	0.0172919	0.0128735	0.00109243
KIM_WT1_TARGETS_UP	0.0765633	-0.0507781	0.0568475	0.0802569	-0.0100884	0.539833	0.0799332	0.0368009	0.161808	0.101188	-0.0080219
KINSEY_TARGETS_OF_EWSR1_FLII_FUSION_DN	0.0704727	0.0601876	2.6e-06	0.0735317	0.0753539	0.0005948	0.0731794	0.101755	1.47e-08	1.76e-14	0.0790989
KINSEY_TARGETS_OF_EWSR1_FLII_FUSION_UP	0.133702	-0.0329229	0.00023543	0.130622	-0.0316559	0.226172	0.130436	-0.0974579	7.76e-10	2.09e-11	-0.0540122
KLEIN_PRIMARY_EFFUSION_LYMPHOMA_DN	0.0436039	0.0473058	0.00148419	0.044678	0.085039	0.00240979	0.0420055	0.0145662	0.149462	6.4e-05	0.0489703
KLEIN_PRIMARY_EFFUSION_LYMPHOMA_UP	0.0823427	0.0589515	0.00810866	0.0788714	0.0104754	0.669089	0.0832144	0.0260651	0.240841	0.0387908	0.0318307
KLEIN_TARGETS_OF_BCR_ABL1_FUSION	0.0175242	0.0497288	0.10475	0.0150983	-0.0865089	0.092849	0.0162264	0.071898	0.169637	0.0460848	0.011706
KOBAYASHI_EGFR_SIGNALING_24HR_DN	0.083807	-0.0935958	0.00178241	0.0822713	0.00648034	0.399048	0.07995	-0.324333	4.34e-07	8.1e-08	-0.13715
KOBAYASHI_EGFR_SIGNALING_24HR_UP	0.0618756	0.0743673	2.25e-06	0.0681242	0.176196	1.13e-10	0.0678165	0.214759	2.78e-17	1.99e-29	0.155107
KOHOUTEK_CCNT1_TARGETS	0.0706957	0.0523546	0.00922199	0.0632034	-0.131886	0.0007177	0.0686237	0.126291	5.14e-05	8.86e-08	0.0155867
KOHOUTEK_CCNT2_TARGETS	0.0138551	0.01016	0.759195	0.0152163	-0.0719257	0.149678	0.0157268	0.156055	0.0184684	0.0549408	0.0314297
KOINUMA_TARGETS_OF_SMAD2_OR_SMAD3	0.117096	-0.0007686	0.955237	0.120567	0.00024412	0.793079	0.119408	0.00735173	0.539675	0.938059	0.00227575
KOKKINAKIS_METHIONINE_DEPRIVATION_48HR_DN	0.101984	0.0385516	0.0250302	0.0998446	-0.0041392	0.78325	0.0982491	-0.0178775	0.930035	0.237444	0.00551165
KOKKINAKIS_METHIONINE_DEPRIVATION_48HR_UP	0.0709677	0.0214563	0.0827935	0.0688902	0.0324665	0.623324	0.0675762	0.0776164	6.62e-06	4.33e-05	0.0438464
KOKKINAKIS_METHIONINE_DEPRIVATION_96HR_DN	0.0894119	8.79e-05	0.403571	0.0888729	-0.0189646	0.438094	0.0861399	-0.0317445	0.41558	0.51572	-0.0168737
KOKKINAKIS_METHIONINE_DEPRIVATION_96HR_UP	0.0780987	0.0606574	1.72e-05	0.0743869	0.0416788	0.252977	0.0750549	0.0912275	9.09e-07	1.47e-09	0.0645213
KONDO_COLON_CANCER_HCP_WITH_H3K27ME1	0.0405505	-0.01026	0.949911	0.0411294	-0.0056291	0.895216	0.0408882	-0.0096124	0.471557	0.934853	-0.0085005
KONDO_EZH2_TARGETS	0.0404266	0.13575	5.07e-15	0.0433118	0.180425	1.26e-13	0.0426427	0.184119	6.84e-18	2.32e-41	0.166765
KONDO_PROSTATE_CANCER_HCP_WITH_H3K27ME3	0.0287476	-0.0028186	0.848151	0.0298064	0.0456133	0.133161	0.0298064	-0.0300714	0.250576	0.309013	0.00424109
KONDO_PROSTATE_CANCER_WITH_H3K27ME3	0.0046595	-0.0929533	0.799659	0.00581531	0.0949757	0.312561	0.00501792	0.187691	0.0843073	0.259372	0.0632379
KONG_E2F3_TARGETS	0.0439894	-0.201238	0.0768039	0.0447747	-0.0188219	0.623324	0.0432443	-0.496402	1.6e-06	1.16e-05	-0.23882
KORKOLA_CORRELATED_WITH_POU5F1	0	NA	0.734682	0.00227883	Inf	0.00071834	0.00102547	Inf	0.00475854	0.00024368	NA
KORKOLA_EMBRYONAL_CARCINOMA_UP	0.143663	0.00550863	0.749686	0.144812	0.0631807	6.83e-05	0.139958	-0.0159024	0.333923	0.00123549	0.0175956
KORKOLA_SEMINOMA_UP	0.126334	0.0238305	0.0140686	0.12842	0.098991	1.05e-11	0.125401	0.023811	0.156999	1.22e-11	0.0488775
KORKOLA_TERATOMA	0.124632	-0.00317	0.458052	0.134146	0.0943041	0.00111416	0.128348	0.00148395	0.598341	0.0127795	0.0308727
KORKOLA_YOLK_SAC_TUMOR	0.0196785	0.0986382	7.63e-13	0.0201215	0.16711	9.99e-16	0.0201643	0.0541724	0.0021266	3.93e-27	0.10664
KOYAMA_SEMA3B_TARGETS_DN	0.0787468	-0.0001365	0.882529	0.0794948	0.00777763	0.881971	0.0774609	0.00735429	0.444723	0.90817	0.00499848
KOYAMA_SEMA3B_TARGETS_UP	0.0561286	0.0953549	4.8e-13	0.0547425	0.0444198	0.0593796	0.0548924	0.094295	3.16e-10	1.32e-20	0.0780233
KRASNOSELSKAYA_ILF3_TARGETS_DN	0.0168741	-0.250461	7.72e-07	0.0177361	-0.361821	1.58e-07	0.022485	-0.211794	0.00048074	4.31e-14	-0.274692
KRASNOSELSKAYA_ILF3_TARGETS_UP	0.073309	0.00931285	0.308354	0.0752759	0.0341747	0.701782	0.0781417	0.0859847	0.0168177	0.0814676	0.0431574
KRIEG_HYPOXIA_NOT_VIA_KDM3A	0.0971806	-0.0225391	0.0294123	0.100638	-0.00562	0.792966	0.0984996	-0.0232586	0.0191276	0.0171642	-0.0171392
KRIEG_HYPOXIA_VIA_KDM3A	0.107267	0.00032013	0.667025	0.101538	-0.0458807	0.0987552	0.0993739	-0.0593955	0.00296627	0.00899021	-0.0349854
KRIEG_KDM3A_TARGETS_NOT_HYPOXIA	0.0953348	0.0433945	1.26e-05	0.091829	0.04844	8.86e-05	0.0910954	0.0217622	0.00721147	2.85e-09	0.0378655
KRIGE_AMINO_ACID_DEPRIVATION	0.086983	-0.0886094	0.00274875	0.0863739	-0.177005	0.00117241	0.0999858	-0.0874271	0.0067551	3.79e-06	-0.117681
KRIGE_RESPONSE_TO_TOSEDOSTAT_24HR_DN	0.149991	-0.0194606	0.0333558	0.146836	0.00016507	0.697328	0.145864	-0.0443209	2.31e-05	6.42e-05	-0.0212054
KRIGE_RESPONSE_TO_TOSEDOSTAT_24HR_UP	0.0596298	-0.0173131	0.39422	0.0605403	-0.0412539	0.049661	0.0623668	0.00582876	0.466817	0.152783	-0.0175794
KRIGE_RESPONSE_TO_TOSEDOSTAT_6HR_DN	0.143959	-0.0114507	0.242203	0.140628	0.00929474	0.717711	0.138982	-0.0349485	0.0004602	0.00439419	-0.0123681
KRIGE_RESPONSE_TO_TOSEDOSTAT_6HR_UP	0.075189	-0.0335303	1.4e-08	0.0763365	-0.0403281	3.3e-07	0.0778347	-0.0302324	0.00041836	1.69e-15	-0.0346969
KUMAR_AUTOPHAGY_NETWORK	0.0664173	-0.0216415	0.192855	0.069525	0.0472772	0.0457098	0.0692363	-0.0292151	0.0206392	0.0084955	-0.0011931
KUMAR_PATHOGEN_LOAD_BY_MACROPHAGES	0.0569506	0.00562677	0.681036	0.0576434	0.0445738	0.00188793	0.0560064	0.00321588	0.616644	0.0266626	0.0178055
KUMAR_TARGETS_OF_MLL_AF9_FUSION	0.0749942	0.0339398	2.4e-05	0.0754905	0.0395834	1.1e-07	0.0763245	0.0569824	4.09e-06	8.71e-15	0.0435019
KUNINGER_IGF1_VS_PDGFB_TARGETS_DN	0.0734304	0.134573	3.6e-12	0.0773407	0.222656	4.07e-12	0.080021	0.143971	1.14e-06	3.79e-26	0.167067
KUNINGER_IGF1_VS_PDGFB_TARGETS_UP	0.0262423	0.0471179	0.00626166	0.0268007	0.0774917	0.00041195	0.0265158	0.00062011	0.692967	0.00018199	0.0417432
KUROZUMI_RESPONSE_TO_ONCOCYTIC_VIRUS	0.0235542	0.00101588	0.94631	0.0235708	-2.26e-07	0.642475	0.0235873	0.00101442	0.518902	0.889379	0.00067669
KUUSELO_PANCREATIC_CANCER_19Q13_AMPLIFICATION	0.0619841	-0.0560621	0.00599266	0.0634274	-0.0453536	0.190623	0.0632121	-0.0613766	0.0199266	0.00156683	-0.0542641
KYNG_DNA_DAMAGE_BY_4NQO	0.141386	0.0597391	8.91e-08	0.135414	0.0308129	0.0177418	0.136479	0.0720148	4.37e-06	3.9e-12	0.054189
KYNG_DNA_DAMAGE_BY_4NQO_OR_UV	0.0811595	-0.0018173	0.764752	0.0832694	0.0187309	0.291849	0.0822017	-0.0106209	0.834755	0.762403	0.00209756
KYNG_DNA_DAMAGE_BY_GAMMA_AND_UV_RADIATION	0.0837934	0.0248657	0.124914	0.0892758	0.108689	4.62e-07	0.087305	0.0464423	0.0664719	7.98e-07	0.0599991
KYNG_DNA_DAMAGE_BY_GAMMA_RADIATION	0.0974417	0.00182859	0.661974	0.0952648	-0.0403824	0.0419535	0.0946533	-0.0189445	0.21946	0.116454	-0.0191661
KYNG_DNA_DAMAGE_BY_UV	0.0441669	-0.0749482	0.00023906	0.0442411	-0.0862716	0.0427399	0.0438227	-0.0211712	0.235259	0.0002347	-0.060797
KYNG_DNA_DAMAGE_DN	0.165601	0.00589997	0.148048	0.165262	0.00920251	0.42365	0.161263	0.0114346	0.117636	0.132509	0.0088457
KYNG_DNA_DAMAGE_UP	0.0568376	0.0439749	0.00044078	0.0564845	0.0393064	0.0018486	0.0549198	-0.0011104	0.691554	6.7e-05	0.0273903
KYNG_ENVIRONMENTAL_STRESS_RESPONSE_NOT_BY_4NQO_IN_WS	0.141479	0.011875	0.350383	0.131878	-0.0454538	0.0152584	0.132452	-0.0064718	0.907932	0.0996122	-0.0133502
KYNG_ENVIRONMENTAL_STRESS_RESPONSE_NOT_BY_GAMMA_IN_OLD	0.0635413	-0.0566499	0.0800457	0.0638325	-0.0283336	0.328755	0.0613004	-0.0005958	0.990433	0.294475	-0.0285264
KYNG_ENVIRONMENTAL_STRESS_RESPONSE_NOT_BY_GAMMA_IN_WS	0.134752	-0.0431509	0.0004279	0.129999	-0.101582	4.21e-08	0.132092	-0.05063	0.00118775	1.13e-11	-0.0651208
KYNG_ENVIRONMENTAL_STRESS_RESPONSE_NOT_BY_UV_IN_OLD	0.113146	-0.0278168	0.0243965	0.110943	-0.028159	0.360268	0.107663	-0.0090208	0.843157	0.1329	-0.0216656
KYNG_ENVIRONMENTAL_STRESS_RESPONSE_UP	0.238836	0.0468955	2.1e-10	0.235615	0.0565655	1.59e-06	0.225582	0.0310128	0.0283631	7.66e-15	0.0448246
KYNG_RESPONSE_TO_H2O2	0.167975	0.00220899	0.821431	0.167228	0.0225497	0.0515369	0.167485	0.0421506	0.00031045	0.00099101	0.0223031
KYNG_RESPONSE_TO_H2O2_VIA_ERCC6_DN	0.204975	0.0113116	0.139853	0.203505	0.0247673	0.0436541	0.200912	0.0161564	0.0689017	0.0164009	0.0174118
KYNG_RESPONSE_TO_H2O2_VIA_ERCC6_UP	0.0700814	0.0116337	0.764833	0.0654501	0.0668239	0.0332645	0.0675337	-0.0010544	0.598297	0.212226	0.0258011
KYNG_WERNER_SYNDROM_AND_NORMAL_AGING_DN	0.106799	-0.0002195	0.92633	0.105945	0.00736121	0.49169	0.10459	0.0165414	0.0681711	0.326026	0.00789439
KYNG_WERNER_SYNDROM_AND_NORMAL_AGING_UP	0.0666875	-0.0544477	0.00014503	0.0668543	-0.0501915	0.0017872	0.0660046	-0.066254	0.00663645	3.87e-07	-0.0569644
LA_MEN1_TARGETS	0.0418851	-0.0570096	0.403632	0.0428016	0.0406731	0.81618	0.0421262	0.0110551	0.689809	0.813423	-0.0017605
LAIHO_COLORECTAL_CANCER_SERRATED_DN	0.0711399	-0.0097042	0.916236	0.0709999	-0.0530771	0.00784364	0.0722702	-0.0025935	0.99913	0.130112	-0.0217916
LAIHO_COLORECTAL_CANCER_SERRATED_UP	0.278142	0.0108331	0.0207808	0.281323	0.0553711	4.95e-13	0.269651	0.00499398	0.337256	2.04e-12	0.0237327
LANDIS_BREAST_CANCER_PROGRESSION_DN	0.0782405	0.0864931	4.57e-09	0.0803496	0.0985087	4.59e-06	0.0810392	0.142168	1.05e-11	3.69e-22	0.109057
LANDIS_BREAST_CANCER_PROGRESSION_UP	0.0703853	0.0280893	0.131868	0.0699103	0.00280349	0.849663	0.0686294	0.0123559	0.60001	0.493703	0.0144163
LANDIS_ERBB2_BREAST_PRENEOPLASTIC_DN	0.0849381	0.0355099	0.0468357	0.0799703	-0.0290034	0.332337	0.0828027	0.0720612	0.00071575	0.00086275	0.0261893
LANDIS_ERBB2_BREAST_TUMORS_324_DN	0.0837355	0.0403269	0.00147504	0.0852734	0.0234915	0.36598	0.0837865	0.06784	3.77e-07	5.55e-08	0.0438861
LANDIS_ERBB2_BREAST_TUMORS_324_UP	0.116253	0.0788687	1.95e-15	0.114026	0.0829368	4.08e-08	0.113207	0.0621904	2.3e-07	4.14e-26	0.0746653
LANDIS_ERBB2_BREAST_TUMORS_65_DN	0.0459714	0.101419	0.00119158	0.0407154	-0.0281763	0.888429	0.0456246	0.143691	0.00098891	0.00011471	0.0723112
LANDIS_ERBB2_BREAST_TUMORS_65_UP	0.169866	0.132934	2.04e-17	0.173503	0.289942	7.03e-35	0.165488	0.131147	1e-10	1.43e-57	0.184674
LANG_MYB_FAMILY_TARGETS	0.169037	-0.0252432	0.157169	0.172757	0.00182167	0.735653	0.169487	-0.0207253	0.354292	0.380935	-0.0147156
LASTOWSKA_COAMPLIFIED_WITH_MYCN	0.086735	-0.0277215	0.198865	0.0917603	0.0791629	0.003289	0.0894595	-0.0477524	0.0768205	0.00300919	0.00122968
LASTOWSKA_NEUROBLASTOMA_COPY_NUMBER_DN	0.0830165	0.0130272	0.0376228	0.0849844	0.0837437	2.14e-24	0.0857033	0.0177348	0.0336375	5.25e-24	0.0381686
LASTOWSKA_NEUROBLASTOMA_COPY_NUMBER_UP	0.0965894	-0.0001595	0.701224	0.0960316	0.0207595	0.330238	0.0948071	-0.0362543	0.0083096	0.0515789	-0.0052181
LAU_APOPTOSIS_CDKN2A_UP	0.0849092	-0.0017679	0.866865	0.0852997	0.00971813	0.563753	0.0838615	0.00347459	0.905171	0.950302	0.00380826
LE_EGR2_TARGETS_DN	0.0536368	0.0490407	0.0116544	0.0539235	0.0809712	0.0783348	0.0521232	0.0723479	0.0535899	0.0029443	0.0674533
LE_EGR2_TARGETS_UP	0.108673	-0.0515245	0.420442	0.105556	0.0111507	0.345881	0.105142	-0.172828	0.00056871	0.00451417	-0.0710672
LEE_AGING_CEREBELLUM_DN	0.0465049	-0.0204666	0.582675	0.0478632	0.0719498	0.0010598	0.0461698	-0.0171685	0.893695	0.0202227	0.0114382
LEE_AGING_CEREBELLUM_UP	0.100761	-0.0095599	0.386092	0.105441	0.0210172	0.145067	0.103013	0.0132082	0.179622	0.162731	0.00822183
LEE_AGING_MUSCLE_DN	0.112027	0.0665085	1.43e-08	0.11908	0.130871	1.06e-17	0.11574	0.0990927	2.15e-11	1.11e-32	0.0988241
LEE_AGING_MUSCLE_UP	0.199154	0.0117796	0.102057	0.202591	0.0468838	4.46e-05	0.200261	0.0358948	0.0083036	6.2e-06	0.0315194
LEE_AGING_NEOCORTEX_DN	0.0858405	-0.0335077	0.012977	0.0854446	-0.0254494	0.170174	0.0813603	-0.0546625	0.00014722	4.15e-05	-0.0378732
LEE_AGING_NEOCORTEX_UP	0.181101	0.0126632	0.0141776	0.183258	0.0135585	0.103585	0.182659	0.0323218	0.00035994	6.34e-05	0.0195145
LEE_BMP2_TARGETS_DN	0.126692	-0.0501772	0.00070996	0.122763	-0.0186502	0.569098	0.122267	-0.127568	5.59e-08	7.37e-09	-0.065465
LEE_BMP2_TARGETS_UP	0.0509602	0.0822789	3.37e-07	0.0499192	0.0268507	0.269714	0.0514211	0.121992	1.79e-11	1.43e-15	0.0770405
LEE_CALORIE_RESTRICTION_MUSCLE_DN	0.0743424	-0.0402845	0.0154857	0.0732152	-0.124469	4.6e-06	0.0770774	-0.0436983	0.0555606	8.21e-07	-0.069484
LEE_CALORIE_RESTRICTION_MUSCLE_UP	0.168331	-0.0635034	9.32e-11	0.168509	-0.0509717	0.00371823	0.165197	-0.042704	0.0015921	3.6e-13	-0.052393
LEE_CALORIE_RESTRICTION_NEOCORTEX_DN	0.126908	0.0265785	0.00572821	0.122926	0.0374471	0.00699543	0.12178	0.0140987	0.916487	0.0023267	0.0260414
LEE_CALORIE_RESTRICTION_NEOCORTEX_UP	0.0443715	-0.0731709	8.8e-05	0.0444201	-0.0625511	0.0335455	0.045623	-0.0468718	0.0585973	2.38e-05	-0.0608646
LEE_DIFFERENTIATING_T_LYMPHOCYTE	0.0440178	0.0455466	6.42e-05	0.0449326	0.0711833	2.75e-05	0.0460904	0.0720606	6.36e-06	6.17e-12	0.0629302
LEE_DOUBLE_POLAR_THYMOCYTE	0	NA	0.00452449	0	NA	0.00128564	0	NA	0.0608991	4.47e-05	NA
LEE_EARLY_T_LYMPHOCYTE_DN	0.0686941	0.00278584	0.907116	0.0673557	-0.0303321	0.523923	0.0657722	0.00655472	0.144866	0.499561	-0.0069972
LEE_EARLY_T_LYMPHOCYTE_UP	0.037272	-0.17354	0.00383083	0.0382989	-0.0681481	0.0433603	0.0361	-0.44064	1.08e-06	4.93e-08	-0.227443
LEE_LIVER_CANCER_ACOX1_DN	0.0037702	-0.392062	0.0433758	0.00608278	0.150526	0.994643	0.00653828	0.16183	0.487766	0.259163	-0.0265687
LEE_LIVER_CANCER_ACOX1_UP	0.138967	-0.0195269	0.0425024	0.139936	-0.0275113	0.248596	0.13622	-0.0079035	0.644739	0.125579	-0.0183139
LEE_LIVER_CANCER_CIPROFIBRATE_DN	0	NA	0.0845472	0.00090741	1.40718	0.6217	0	#NAME?	0.901825	0.412285	NA
LEE_LIVER_CANCER_CIPROFIBRATE_UP	0.0793549	0.0178319	0.281442	0.087288	0.0972545	2.22e-06	0.0858298	0.113015	0.00021317	3.77e-08	0.0760337
LEE_LIVER_CANCER_DENA_DN	0.0107431	0.195755	0.00033134	0.0117418	0.291166	1.89e-05	0.0119578	0.36071	2.23e-07	8.66e-13	0.282544
LEE_LIVER_CANCER_DENA_UP	0.127775	0.0452425	5.41e-05	0.132039	0.0490254	0.00071834	0.130243	0.0765712	1e-06	1.98e-11	0.0569463
LEE_LIVER_CANCER_E2F1_DN	0.044611	0.0904436	6.81e-07	0.0418546	0.0768687	0.0150172	0.0425304	0.152833	2.5e-08	1.74e-13	0.106715
LEE_LIVER_CANCER_E2F1_UP	0.140058	0.0569343	8.13e-12	0.13934	0.0594114	1.03e-05	0.13709	0.0835566	1.01e-10	1.58e-23	0.0666341
LEE_LIVER_CANCER_MYC_DN	0.0537914	-0.0425416	0.00020225	0.0560997	0.020057	0.221998	0.0555226	-0.0113987	0.316598	0.00105825	-0.0112944
LEE_LIVER_CANCER_MYC_E2F1_DN	0.00459398	0.041119	0.845416	0.00665178	0.167457	0.148997	0.00757817	0.24865	0.0747091	0.155759	0.152409
LEE_LIVER_CANCER_MYC_E2F1_UP	0.159217	0.0179664	0.0197637	0.152698	-0.0222699	0.220796	0.153541	-0.0260764	0.083529	0.0146734	-0.0101266
LEE_LIVER_CANCER_MYC_TGFA_DN	0.0117801	-0.116203	0.00106388	0.00979691	-0.436548	1.4e-08	0.0114508	0.0106343	0.907327	4.57e-09	-0.180705
LEE_LIVER_CANCER_MYC_TGFA_UP	0.164574	0.0222592	0.0222378	0.162004	0.0169987	0.260962	0.164053	0.0134354	0.522731	0.0716112	0.0175644
LEE_LIVER_CANCER_MYC_UP	0.252168	0.0122591	0.00934797	0.248971	0.00564311	0.45251	0.247733	0.00589314	0.139759	0.0213188	0.0079318
LEE_LIVER_CANCER_SURVIVAL_DN	0.251915	-0.036683	0.00396035	0.252555	0.0151185	0.387964	0.240577	-0.0959052	1.32e-09	7.92e-10	-0.0391565
LEE_LIVER_CANCER_SURVIVAL_UP	0.0181358	-0.0409577	0.0123215	0.0167065	-0.111418	0.00025964	0.017828	-0.0124026	0.634888	0.00020312	-0.0549262
LEE_METASTASIS_AND_ALTERNATIVE_SPLICING_DN	0.060252	0.0548271	0.00010021	0.0602707	0.0294298	0.0553318	0.0622648	0.0554993	0.0397394	2.95e-05	0.0465854
LEE_METASTASIS_AND_ALTERNATIVE_SPLICING_UP	0.0636004	0.103935	3.57e-09	0.0681519	0.159218	2.06e-08	0.0630342	0.0770337	1.61e-05	1.43e-18	0.113396
LEE_NEURAL_CREST_STEM_CELL_DN	0.0549596	0.0734012	5.43e-10	0.0567808	0.121254	1.33e-07	0.055019	0.090201	1.48e-06	1.43e-19	0.0949519
LEE_NEURAL_CREST_STEM_CELL_UP	0.0757604	0.0493107	3.42e-05	0.0786128	0.0731551	1.69e-07	0.0764909	0.0793998	5.89e-08	3.23e-16	0.0672885
LEE_RECENT_THYMIC_EMIGRANT	0.0890467	-0.0239984	0.00439026	0.0905761	-0.0118041	0.550281	0.0895887	-0.0191717	0.0367712	0.00478298	-0.0183247
LEE_TARGETS_OF_PTCH1_AND_SUFU_DN	0.00908476	0.0990559	0.0519178	0.00923282	-0.126495	0.220796	0.00995199	0.0357005	0.330571	0.0838177	0.00275392
LEE_TARGETS_OF_PTCH1_AND_SUFU_UP	0.115335	-0.0141311	0.171058	0.119651	0.0475875	0.00242391	0.124325	-0.0072197	0.222987	0.00493993	0.00874555
LEI_MYB_TARGETS	0.15571	0.0150949	0.00121441	0.151513	0.0119738	0.0179696	0.153351	0.0200961	0.00356481	1.18e-05	0.0157216
LEIN_ASTROCYTE_MARKERS	0.0919163	0.108198	5.54e-10	0.0937232	0.175425	2.01e-12	0.0907117	0.126654	1.32e-09	3.57e-27	0.136759
LEIN_CEREBELLUM_MARKERS	0.0180281	-0.0521142	0.469304	0.0187529	-0.0558536	0.485569	0.0201254	-0.018672	0.57828	0.669468	-0.0422133
LEIN_CHOROID_PLEXUS_MARKERS	0.0514004	0.165703	2.55e-21	0.0486321	0.189715	2.47e-14	0.0497435	0.15925	2.62e-14	1.01e-44	0.171556
LEIN_LOCALIZED_TO_PROXIMAL_DENDRITES	0.0892667	0.0775478	8.42e-11	0.0878108	0.115581	6.73e-06	0.0851269	0.0939678	3.37e-06	2.27e-18	0.095699
LEIN_MEDULLA_MARKERS	0.0884198	0.0131986	0.157629	0.0871644	0.0153126	0.201894	0.0874395	0.0205277	0.0391541	0.0374451	0.0163463
LEIN_MIDBRAIN_MARKERS	0.0128921	0.0828104	0.0179897	0.0131988	0.15612	0.082419	0.0146953	0.213938	0.00126342	0.00018948	0.150956
LEIN_NEURON_MARKERS	0.0259647	-0.15547	3.57e-06	0.028802	-0.149132	2.98e-06	0.0298106	-0.0147262	0.797108	2.98e-09	-0.106443
LEIN_OLIGODENDROCYTE_MARKERS	0.061917	0.0446714	0.0536895	0.0630962	0.095465	3.44e-05	0.0586702	0.0391455	0.0756634	1.98e-05	0.0597606
LEIN_PONS_MARKERS	0.0717056	-0.0078223	0.107884	0.0711875	0.0264425	0.0954622	0.0704917	-0.0137702	0.146005	0.043041	0.00161666
LENAOUR_DENDRITIC_CELL_MATURATION_DN	0.0805338	0.00171047	0.918336	0.0782652	0.0152872	0.393958	0.0789177	0.0230292	0.169775	0.471844	0.0133423
LENAOUR_DENDRITIC_CELL_MATURATION_UP	0.0597915	0.0241076	0.497383	0.0611066	0.0172861	0.520393	0.0606958	0.0540987	0.100717	0.294511	0.0318308
LEONARD_HYPOXIA	0.130126	-0.0581163	0.116912	0.136757	-0.0177285	0.891848	0.127999	-0.042502	0.169677	0.23307	-0.0394489
LI_AMPLIFIED_IN_LUNG_CANCER	0.355512	0.0189082	2.08e-10	0.350905	0.0216629	3.68e-07	0.34151	0.000544	0.546044	3.13e-14	0.013705
LI_CISPLATIN_RESISTANCE_DN	0.035325	0.0803393	0.0056988	0.037367	0.0556899	0.179263	0.0360485	0.0564293	0.351507	0.0145036	0.0641528
LI_CISPLATIN_RESISTANCE_UP	0.0362093	0.1174	1.49e-07	0.0384603	0.16601	0.00118572	0.0373187	0.167906	3.49e-05	3.5e-12	0.150439
LI_DCP2_BOUND_MRNA	0.246997	0.0108317	0.319674	0.236026	0.00427655	0.443497	0.233	-0.0102045	0.532392	0.522481	0.00163459
LI_INDUCED_T_TO_NATURAL_KILLER_DN	0.0295935	-0.0042382	0.982992	0.0291301	-0.0657981	0.0551645	0.0300625	0.0176287	0.840884	0.40379	-0.0174692
LI_INDUCED_T_TO_NATURAL_KILLER_UP	0.116568	0.0124023	0.263736	0.115544	-0.00664	0.77627	0.115324	0.0225942	0.0154038	0.0736166	0.00945219
LI_LUNG_CANCER	0.305511	0.0388247	1.31e-09	0.285391	0.0173557	0.0035661	0.285017	0.0146235	0.153791	3.02e-10	0.0236013
LI_PROSTATE_CANCER_EPIGENETIC	0.0278395	0.0717547	0.290256	0.0304265	0.150918	0.0696285	0.0279081	-0.0106125	0.756357	0.212788	0.0706868
LI_WILMS_TUMOR	0.00553108	Inf	0.00061642	0	NA	0.0708924	0	NA	0.433013	0.00134368	NA
LI_WILMS_TUMOR_VS_FETAL_KIDNEY_1_DN	0.0838404	-0.054272	0.127821	0.0839175	-0.0029031	0.830796	0.0808029	-0.224793	1.49e-07	2.85e-06	-0.0939895
LI_WILMS_TUMOR_VS_FETAL_KIDNEY_1_UP	0.0671774	0.0256419	0.0281755	0.0688908	0.0143118	0.938067	0.0677471	0.00122298	0.31692	0.144222	0.0137255
LI_WILMS_TUMOR_VS_FETAL_KIDNEY_2_DN	0.0515741	-0.0455781	0.155048	0.0500402	-0.196198	1.53e-06	0.0549835	0.0243117	0.316581	1.14e-05	-0.0724882
LI_WILMS_TUMOR_VS_FETAL_KIDNEY_2_UP	0.0842487	-0.0292095	0.988711	0.0817871	0.0180236	0.60191	0.0783101	-0.173385	4.05e-05	0.00164145	-0.0615237
LIAN_LIPA_TARGETS_3M	0.0106394	0.0600295	0.21089	0.0116864	0.0860761	0.351283	0.0134209	0.323635	3.5e-06	3.4e-05	0.15658
LIAN_LIPA_TARGETS_6M	0.0104239	0.0514957	0.17816	0.0119646	0.086208	0.398958	0.0138985	0.3335	4e-06	3.69e-05	0.157068
LIAN_NEUTROPHIL_GRANULE_CONSTITUENTS	0.0148466	0.0440211	0.558733	0.0176313	0.182252	0.218715	0.0212776	0.37019	0.0002554	0.00203473	0.198821
LIANG_HEMATOPOIESIS_STEM_CELL_NUMBER_LARGE_VS_TINY_DN	0.0864675	0.0369832	0.00270667	0.0882827	0.0959955	1.88e-06	0.08338	-0.0099455	0.595654	6.46e-07	0.0410111
LIANG_HEMATOPOIESIS_STEM_CELL_NUMBER_LARGE_VS_TINY_UP	0.124591	0.0123163	0.418061	0.122588	0.0251462	0.0205874	0.119909	-0.0005355	0.498005	0.091367	0.012309
LIANG_HEMATOPOIESIS_STEM_CELL_NUMBER_SMALL_VS_HUGE_DN	0.144406	0.00906253	0.368082	0.142265	-0.0053293	0.905224	0.141613	0.0132387	0.299923	0.595177	0.00565732
LIANG_HEMATOPOIESIS_STEM_CELL_NUMBER_SMALL_VS_HUGE_UP	0.144451	0.0694875	2.02e-14	0.148117	0.172053	4.39e-27	0.14373	0.0675991	1.38e-05	6.67e-42	0.103047
LIANG_SILENCED_BY_METHYLATION_2	0.0439463	0.00306633	0.411401	0.0458208	0.0824308	0.18636	0.0446588	0.0419813	0.165346	0.188982	0.0424928
LIANG_SILENCED_BY_METHYLATION_UP	0.070295	0.28561	9.66e-27	0.0571091	0.21496	0.00022947	0.0646755	0.136188	0.00029042	1.93e-30	0.212253
LIAO_HAVE_SOX4_BINDING_SITES	0.0385636	0.031302	0.127403	0.0476326	0.133197	0.0117237	0.0444464	0.0529596	0.152741	0.0101623	0.0724862
LIAO_METASTASIS	0.0596861	-0.0517101	3.44e-15	0.0609614	-0.0589374	1.01e-11	0.061805	-0.0512636	1.23e-10	1.45e-32	-0.0539704
LIEN_BREAST_CARCINOMA_METAPLASTIC	0.107271	0.132279	2.67e-12	0.110648	0.204936	4.76e-14	0.110499	0.171345	1.79e-13	8.73e-35	0.16952
LIEN_BREAST_CARCINOMA_METAPLASTIC_VS_DUCTAL_DN	0.0399808	0.034882	0.0458351	0.0368597	-0.0395189	0.194793	0.0377005	0.0296818	0.240991	0.0559443	0.00834832
LIEN_BREAST_CARCINOMA_METAPLASTIC_VS_DUCTAL_UP	0.0871494	0.00129512	0.981179	0.0838807	-0.0552379	0.0452741	0.0854708	-0.0071101	0.95743	0.388839	-0.020351
LIM_MAMMARY_LUMINAL_MATURE_DN	0.0599984	-0.0515373	0.00045515	0.0621967	-0.0306451	0.0781019	0.0616838	-0.0461014	0.00427384	2.13e-05	-0.0427613
LIM_MAMMARY_LUMINAL_MATURE_UP	0.00195921	-0.387185	0.0029138	0.00184308	-0.92785	9.14e-05	0.00255859	-0.154114	0.697583	2.54e-05	-0.489716
LIM_MAMMARY_LUMINAL_PROGENITOR_UP	0.00176276	-0.387381	0.232214	0.00446269	0.0144996	0.881539	0.00336933	0.284208	0.281867	0.457033	-0.0295578
LIM_MAMMARY_STEM_CELL_DN	0.0307311	0.00241456	0.896723	0.0308724	-0.033137	0.0933983	0.03117	0.027414	0.0151883	0.0380247	-0.0011028
LIM_MAMMARY_STEM_CELL_UP	0.0481292	0.0378294	0.00220639	0.0491844	0.0264422	0.0099871	0.0499633	0.0488282	0.0018912	6.77e-06	0.0376999
LIN_APC_TARGETS	0.155369	0.0215721	0.00084322	0.152603	0.0167509	0.154786	0.152121	0.0131488	0.198275	0.00174268	0.0171573
LIN_MELANOMA_COPY_NUMBER_DN	0.133395	-0.0748711	4.78e-12	0.135427	-0.0835034	3.72e-08	0.134275	-0.0503103	0.00419834	9.2e-19	-0.0695616
LIN_MELANOMA_COPY_NUMBER_UP	0.0737987	-0.0472231	0.00011102	0.0749895	-0.0453172	0.00157776	0.0710411	-0.0630483	0.00124078	5.88e-08	-0.0518629
LIN_NPAS4_TARGETS_DN	0.0484861	-0.0342867	0.361307	0.0487246	-0.0606975	0.0900527	0.0505731	0.0834521	0.00593844	0.00891069	-0.003844
LIN_NPAS4_TARGETS_UP	0.0419393	-0.0152864	0.118805	0.0434268	0.01987	0.943667	0.0454592	0.00390023	0.964232	0.616105	0.00282794
LIN_SILENCED_BY_TUMOR_MICROENVIRONMENT	0.0378871	0.00535084	0.486054	0.0393402	0.0493922	0.0969714	0.0383303	0.00042248	0.721157	0.343288	0.0183885
LINDGREN_BLADDER_CANCER_CLUSTER_1_DN	0.0806848	-0.0059615	0.780269	0.0819684	0.0174361	0.697328	0.0794516	-0.0732277	1.16e-05	0.0005356	-0.0205843
LINDGREN_BLADDER_CANCER_CLUSTER_1_UP	0.0977866	0	0.539855	0.0997703	0.00979181	0.656671	0.0990579	0.0101123	0.391046	0.683184	0.0066347
LINDGREN_BLADDER_CANCER_CLUSTER_2A_DN	0.0793462	0.0102012	0.409087	0.0843718	0.0311722	0.241273	0.0797069	0.0372542	0.00378169	0.0149471	0.0262092
LINDGREN_BLADDER_CANCER_CLUSTER_2B	0.0766055	0.0607988	6.92e-08	0.0777591	0.0660156	0.00026335	0.0764317	0.0874304	3.99e-08	6.64e-16	0.0714149
LINDGREN_BLADDER_CANCER_CLUSTER_3_DN	0.0715924	-0.0303299	0.00138073	0.0733108	-0.0233313	0.00480606	0.0726648	-0.0110831	0.0877843	6.9e-05	-0.0215814
LINDGREN_BLADDER_CANCER_CLUSTER_3_UP	0.0748406	-0.032881	0.441542	0.0748779	0.0195748	0.993852	0.0705792	-0.188714	6.89e-05	0.00198121	-0.0673402
LINDGREN_BLADDER_CANCER_HIGH_RECURRENCE	0.150325	0.105208	6.11e-17	0.148153	0.0865081	1.37e-08	0.148661	0.0723905	0.00102417	1.72e-24	0.0880355
LINDGREN_BLADDER_CANCER_WITH_LOH_IN_CHR9Q	0.0585986	-0.0674914	5.6e-11	0.0600981	-0.0349108	0.0022817	0.0607412	-0.0452725	0.00124896	1.12e-13	-0.0492249
LINDSTEDT_DENDRITIC_CELL_MATURATION_A	0.0538033	0.0562723	0.00735946	0.0504629	0.0965348	0.0100981	0.0546063	0.122746	5.92e-06	1.12e-07	0.091851
LINDSTEDT_DENDRITIC_CELL_MATURATION_B	0.0614438	-0.0401277	0.267607	0.0622992	-0.0289878	0.206508	0.062738	0.0588225	0.0519614	0.068863	-0.003431
LINDSTEDT_DENDRITIC_CELL_MATURATION_C	0.0720168	-0.0236283	0.0772362	0.0718122	-0.0674996	0.00281507	0.0718058	-0.0233181	0.222049	0.00291246	-0.0381487
LINDSTEDT_DENDRITIC_CELL_MATURATION_D	0.0502918	0.0272952	0.0739571	0.052895	0.0782914	0.00111416	0.0503983	0.0831331	0.00389207	4.1e-05	0.0629066
LINDVALL_IMMORTALIZED_BY_TERT_DN	0.0494071	-0.00587	0.909215	0.0461024	-0.177703	3.11e-06	0.0513017	0.0652998	0.0558587	2.2e-05	-0.0394244
LINDVALL_IMMORTALIZED_BY_TERT_UP	0.0964948	-0.0115793	0.327099	0.097406	-0.0157497	0.807015	0.100869	0.0293163	0.106133	0.307203	0.00066245
LINSLEY_MIR16_TARGETS	0.0522007	0.0200456	0.0306199	0.0534529	0.0162304	0.220282	0.0553342	0.0649682	8.03e-07	1.09e-06	0.0337481
LIU_BREAST_CANCER	0.206483	-0.0227166	0.00791484	0.205422	-0.0379623	0.0143463	0.202929	-0.0335148	0.00212238	3.19e-05	-0.0313979
LIU_CDX2_TARGETS_UP	0.0209728	0.230541	0.0312799	0.0211303	0.11757	0.283284	0.0229414	0.230392	0.00454782	0.00251134	0.192834
LIU_CMYB_TARGETS_UP	0.0515277	-0.0301742	0.105209	0.0540349	0.0145092	0.950286	0.0524255	-0.0410318	0.0161915	0.045445	-0.0188989
LIU_COMMON_CANCER_GENES	0.153722	-0.0308065	0.0015166	0.156261	0.00534726	0.684077	0.157009	-0.0112156	0.294528	0.0127862	-0.0122249
LIU_LIVER_CANCER	0.00927043	0.0110835	0.848151	0.0132435	0.0903644	0.62825	0.01348	0.166133	0.187224	0.594723	0.0891937
LIU_NASOPHARYNGEAL_CARCINOMA	0.140407	0.0241816	9.39e-05	0.139447	0.0332384	0.00531037	0.140021	0.020767	0.327253	2.26e-05	0.0260623
LIU_PROSTATE_CANCER_DN	0.0578857	0.0290406	0.00688062	0.0589889	0.0300124	0.423455	0.0585267	0.0460621	0.00257006	0.00061739	0.0350384
LIU_PROSTATE_CANCER_UP	0.0873082	-0.0054141	0.735553	0.0908433	0.014239	0.108135	0.0889663	-0.0095228	0.178551	0.203146	-0.0002326
LIU_SMARCA4_TARGETS	0.116867	0.117286	9.16e-13	0.11971	0.142888	2.04e-12	0.121832	0.180638	4.31e-16	3.34e-36	0.146937
LIU_SOX4_TARGETS_DN	0.108186	-0.0105853	0.123585	0.10958	0	0.950798	0.108289	-0.0052615	0.280143	0.337098	-0.0052823
LIU_SOX4_TARGETS_UP	0.051021	-0.0461792	0.0104053	0.0551153	-0.0478972	0.0293329	0.0533495	-0.0244054	0.356968	0.0056387	-0.0394939
LIU_TARGETS_OF_VMYB_VS_CMYB_DN	0.0554074	0.0110987	0.56309	0.05757	0.0777824	0.00055866	0.0551704	0.0337014	0.0975758	0.00200692	0.0408608
LIU_VAV3_PROSTATE_CARCINOGENESIS_UP	0.0657293	0.0436772	0.0356287	0.0675065	0.0249767	0.477203	0.0718013	0.130153	3.34e-06	8.91e-06	0.066269
LIU_VMYB_TARGETS_UP	0.0565028	-0.0501373	0.00021017	0.0599442	0.00030872	0.697576	0.0589147	-0.0650349	0.0001707	4.3e-06	-0.0382879
LOCKWOOD_AMPLIFIED_IN_LUNG_CANCER	0.120941	0.00398679	0.786979	0.118847	0.0133671	0.120076	0.11456	-0.0173522	0.0425041	0.0873104	5.82e-07
LOPES_METHYLATED_IN_COLON_CANCER_DN	0.0235988	0.21969	0.0022382	0.0207965	0.23266	0.020254	0.0225959	0.441649	2.28e-05	2.44e-07	0.298
LOPEZ_MBD_TARGETS	0.207664	0.00464894	0.0510704	0.203801	0.0109622	0.00104886	0.200534	0.00216522	0.688955	0.00233605	0.00592546
LOPEZ_TRANSLATION_VIA_FN1_SIGNALING	0.180419	-0.0452334	0.00021081	0.181452	-0.0321516	0.098454	0.177751	-0.0416648	0.0037298	1.17e-05	-0.0396833
LU_AGING_BRAIN_DN	0.108776	0.0275539	1.63e-05	0.105425	0.0360863	0.0031327	0.105648	0.00205665	0.726544	6.12e-06	0.021899
LU_AGING_BRAIN_UP	0.0986936	0.00023529	0.92774	0.102884	0.0350836	0.0654766	0.0998555	0.00260636	0.333327	0.253172	0.0126417
LU_EZH2_TARGETS_DN	0.0504836	0.0223386	0.144172	0.0526414	0.0358058	0.0167131	0.051318	-0.004157	0.963099	0.0590917	0.0179958
LU_EZH2_TARGETS_UP	0.123947	0.0348081	2.49e-05	0.121876	0.0245729	0.0229476	0.120104	0.0450997	5.42e-06	1.17e-09	0.0348269
LU_IL4_SIGNALING	0.0788512	-0.0162127	0.260269	0.0784719	-0.0490609	0.00514746	0.0794178	0.00607281	0.60001	0.0269424	-0.0197336
LU_TUMOR_ANGIOGENESIS_UP	0.0998725	-0.0006136	0.96766	0.0971105	-0.110159	0.0122663	0.101586	-0.0247306	0.522384	0.117823	-0.0451676
LU_TUMOR_VASCULATURE_UP	0.110126	0.0282976	5.61e-06	0.108177	0.03979	5.75e-05	0.111079	0.0418309	0.00065657	9.65e-11	0.0366395
LUCAS_HNF4A_TARGETS_UP	0.028719	0.0128367	0.911059	0.0266769	-0.166285	0.00316582	0.0280933	0.0583641	0.269155	0.0262397	-0.0316947
LUI_TARGETS_OF_PAX8_PPARG_FUSION	0.541589	-0.0066955	0.213209	0.53831	0.00183324	0.815213	0.532638	-0.001782	0.936648	0.726538	-0.0022148
LUI_THYROID_CANCER_CLUSTER_1	0.0889504	-0.0021263	0.835818	0.0853499	-0.0517897	0.112418	0.0833309	-0.0436253	0.159729	0.210351	-0.0325137
LUI_THYROID_CANCER_CLUSTER_2	0.00687077	-0.432682	0.00010646	0.00891776	-0.373408	0.00994996	0.00865967	-0.163817	0.203078	2.89e-05	-0.323302
LUI_THYROID_CANCER_CLUSTER_3	0.583422	0.00753279	0.0837022	0.573422	0.00878417	0.156111	0.560192	0.00544206	0.154314	0.0533666	0.00725301
LUI_THYROID_CANCER_PAX8_PPARG_DN	0.447303	0.0138158	0.00255182	0.438733	0.0147666	0.0175068	0.438635	0.0230447	4.27e-05	4.24e-07	0.017209
LUI_THYROID_CANCER_PAX8_PPARG_UP	0.0555694	-0.123617	6.29e-08	0.058245	-0.109109	0.00014848	0.0563294	-0.089156	0.00121699	6.23e-12	-0.107294
LY_AGING_OLD_DN	0.167473	-0.0430616	0.0285908	0.160048	-0.0069242	0.281482	0.144736	-0.245267	1.89e-08	4.25e-08	-0.0984175
LY_AGING_PREMATURE_DN	0.125312	-0.0862174	0.00647204	0.128383	0.0178073	0.478085	0.107922	-0.387405	5.02e-10	6.18e-10	-0.151939
MA_MYELOID_DIFFERENTIATION_DN	0.099487	0.0693851	0.00099226	0.103316	0.0976131	1.01e-05	0.104655	0.0895777	2.93e-05	1.32e-10	0.0855253
MA_MYELOID_DIFFERENTIATION_UP	0.252819	0.0091168	0.0658531	0.24858	0.0283815	0.00312292	0.246137	0.00917517	0.149937	0.00201447	0.0155578
MACAEVA_PBMC_RESPONSE_TO_IR	0.0243552	-0.111087	1.46e-05	0.024585	-0.186262	3.47e-07	0.0258236	-0.0584846	0.0311504	7.35e-11	-0.118611
MADAN_DPPA4_TARGETS	0.0591302	-0.0333421	0.169179	0.0526129	-0.118473	4.68e-07	0.0496603	-0.135442	1.99e-05	6.26e-10	-0.0957525
MAGRANGEAS_MULTIPLE_MYELOMA_IGG_VS_IGA_DN	0.152574	0.0319184	0.00905655	0.148958	0.0451015	0.0035661	0.14062	0.0104553	0.462793	0.00110364	0.0291584
MAGRANGEAS_MULTIPLE_MYELOMA_IGLL_VS_IGLK_DN	0.0381895	0.187203	0.00016727	0.0452953	0.297994	1.86e-08	0.0469623	0.481191	8.61e-18	5.97e-26	0.322129
MAGRANGEAS_MULTIPLE_MYELOMA_IGLL_VS_IGLK_UP	0.0410232	0.0323503	0.552007	0.0385161	0.0100071	0.740368	0.0414448	0.106559	0.0372072	0.212089	0.0496387
MAHAJAN_RESPONSE_TO_IL1A_DN	0.123457	0.0261327	0.00554201	0.122846	0.0622026	8.02e-05	0.116618	0.0114286	0.120559	8.46e-06	0.0332546
MAHAJAN_RESPONSE_TO_IL1A_UP	0.0324381	0.0287954	0.388894	0.0342949	0.0362519	0.591381	0.0332725	0.127427	0.00019013	0.00268549	0.0641581
MALONEY_RESPONSE_TO_17AAG_DN	0.346241	-0.0144476	0.268223	0.34117	0.00964733	0.673851	0.331847	-0.0464414	3.07e-05	0.00047923	-0.0170806
MALONEY_RESPONSE_TO_17AAG_UP	0.148968	0.0029335	0.866865	0.147508	-0.0039986	0.438094	0.144055	0.00517872	0.322714	0.649852	0.00137121
MANALO_HYPOXIA_DN	0.0740374	-0.10801	2.29e-05	0.0736204	-0.0541766	0.161959	0.0733902	-0.180635	8.05e-10	1.77e-12	-0.114274
MANALO_HYPOXIA_UP	0.0489962	-0.0451862	0.148255	0.050993	-0.0947993	0.00700326	0.0508584	-0.0049493	0.513024	0.0196793	-0.0483116
MANNE_COVID19_COMBINED_COHORT_VS_HEALTHY_DONOR_PLATELETS_DN	0.0154818	0.081049	0.00067897	0.0159681	0.0391147	0.328629	0.0155008	0.0786584	0.0114361	0.00024703	0.066274
MANNE_COVID19_COMBINED_COHORT_VS_HEALTHY_DONOR_PLATELETS_UP	0.058572	0.0595324	5.63e-07	0.0559985	0.0576544	0.0005022	0.059624	0.0892823	1.27e-06	2.39e-13	0.068823
MANNE_COVID19_ICU_VS_HEALTHY_DONOR_PLATELETS_DN	0.00821063	0.117141	0.0398557	0.00927994	0.0672543	0.531029	0.0091443	0.0887698	0.047928	0.0321085	0.091055
MANNE_COVID19_ICU_VS_HEALTHY_DONOR_PLATELETS_UP	0.0595598	0.0732911	5.03e-06	0.0571553	0.0615282	0.0446238	0.058705	0.0600561	0.00189938	1.09e-07	0.0649585
MANNE_COVID19_NONICU_VS_HEALTHY_DONOR_PLATELETS_DN	0.0235019	0.0696861	8.9e-05	0.0234879	0.0112454	0.797188	0.0229945	-0.0083372	0.683337	0.00292197	0.0241981
MANNE_COVID19_NONICU_VS_HEALTHY_DONOR_PLATELETS_UP	0.0697225	0.053996	0.00044747	0.0666566	0.0596561	0.00258586	0.0686595	0.0532654	0.00187079	4.76e-07	0.0556392
MARCHINI_TRABECTEDIN_RESISTANCE_DN	0.162098	0.0222814	0.00042414	0.165399	0.0595504	1.8e-08	0.161924	0.0341428	0.00541446	2.1e-11	0.0386582
MARIADASON_REGULATED_BY_HISTONE_ACETYLATION_DN	0.0372731	-0.111338	1.28e-06	0.0365077	-0.180903	1.82e-05	0.0361695	-0.15852	4.04e-06	6.76e-14	-0.150254
MARIADASON_REGULATED_BY_HISTONE_ACETYLATION_UP	0.0328299	-0.0342854	0.552572	0.0361568	0.0365394	0.177869	0.036177	0.141546	0.0045647	0.0172395	0.0479333
MARIADASON_RESPONSE_TO_BUTYRATE_SULINDAC_6	0.125819	-0.0551622	0.00222501	0.127554	-0.0461624	0.196757	0.126522	-0.1171	9.42e-07	1.06e-07	-0.0728082
MARKEY_RB1_ACUTE_LOF_DN	0.043795	-0.0009395	0.985619	0.0465657	0.0038357	0.817638	0.0464452	0.0961914	0.00304229	0.0614813	0.0330292
MARKEY_RB1_ACUTE_LOF_UP	0.112198	-0.0428618	0.240165	0.11066	0.0392737	0.887971	0.10728	-0.192037	4.34e-05	0.00073761	-0.0652085
MARKEY_RB1_CHRONIC_LOF_DN	0.0542971	0.0482129	0.0287465	0.0502338	-0.0843496	0.0181377	0.0547588	0.0999924	0.00038487	2.72e-05	0.0212852
MARKEY_RB1_CHRONIC_LOF_UP	0.0730042	-0.0533573	0.00290816	0.0708876	-0.0800092	0.00963406	0.0737473	-0.0499983	0.0155185	5.35e-05	-0.0611216
MARSHALL_VIRAL_INFECTION_RESPONSE_DN	0.0630944	0.00530578	0.891839	0.0625903	-0.0025102	0.966171	0.0625085	0.135053	0.0126598	0.17154	0.0459495
MARSON_BOUND_BY_E2F4_UNSTIMULATED	0.081501	-0.0664589	0.0107214	0.0799442	-0.0293152	0.226401	0.079151	-0.161991	1.38e-05	5.57e-06	-0.0859217
MARSON_BOUND_BY_FOXP3_STIMULATED	0.112029	0.00752511	0.0580029	0.113136	0.027037	2.79e-05	0.111503	0.0110472	0.0171228	4.71e-06	0.0152031
MARSON_BOUND_BY_FOXP3_UNSTIMULATED	0.117954	-0.0037354	0.59672	0.119449	0.00261361	0.938007	0.118663	-0.0017515	0.161082	0.568104	-0.0009578
MARSON_FOXP3_TARGETS_DN	0.0773178	-0.065407	8.42e-05	0.0790962	-0.0281729	0.22418	0.0779155	-0.0687818	0.00251096	7.59e-06	-0.0541206
MARSON_FOXP3_TARGETS_STIMULATED_UP	0.05944	0.239309	3.28e-21	0.0619711	0.268282	2.43e-16	0.0574835	0.266537	7.41e-14	3.87e-46	0.258043
MARSON_FOXP3_TARGETS_UP	0.152121	0.0082177	0.484782	0.157002	0.0389817	0.135455	0.149506	0.014036	0.372345	0.283559	0.0204118
MARTENS_BOUND_BY_PML_RARA_FUSION	0.0772429	0.00060267	0.782366	0.0773195	-0.0225477	0.017185	0.0784649	0.0155811	0.0540067	0.0249409	-0.0021213
MARTENS_TRETINOIN_RESPONSE_DN	0.216976	-0.0144528	0.00278744	0.211743	-0.0176306	0.0415258	0.210347	-0.0249358	6.58e-05	1.48e-06	-0.0190064
MARTENS_TRETINOIN_RESPONSE_UP	0.0103516	0.0338146	0.0307169	0.0102834	-0.0009001	0.717149	0.0105369	0.1185	0.00254529	0.00329128	0.0504716
MARTIN_INTERACT_WITH_HDAC	0.13246	0.0025836	0.498539	0.128076	0.0192605	0.374428	0.12772	0.00379699	0.767656	0.692143	0.00854704
MARTIN_NFKB_TARGETS_UP	0.0427046	0.0248749	0.650906	0.0410256	-0.0744176	0.406275	0.043024	0.0101326	0.974393	0.844015	-0.0131367
MARTIN_VIRAL_GPCR_SIGNALING_DN	0.0467437	0.0804772	3.11e-05	0.0453679	0.0547925	0.144742	0.0461718	0.0185048	0.663036	0.00028255	0.0512582
MARTIN_VIRAL_GPCR_SIGNALING_UP	0.0321084	-0.02641	0.308354	0.0344558	-0.0143637	0.264259	0.0330413	-0.0282782	0.371156	0.321132	-0.0230173
MARTINEZ_RB1_AND_TP53_TARGETS_DN	0.120623	0.00985486	0.00641678	0.12022	0.00678421	0.376548	0.120463	0.00440645	0.399038	0.0309068	0.00701517
MARTINEZ_RB1_AND_TP53_TARGETS_UP	0.0949453	0.0118634	0.0827243	0.0963048	0.00415421	0.478302	0.0955899	0.0124261	0.103619	0.0885751	0.00948122
MARTINEZ_RB1_TARGETS_DN	0.10529	0.011111	0.00145563	0.105876	0.0172817	0.00361942	0.105662	0.0104921	0.0151592	1.21e-05	0.0129616
MARTINEZ_RB1_TARGETS_UP	0.108794	0.00454833	0.349291	0.109237	-0.0021301	0.83713	0.108704	0.00344882	0.647293	0.766542	0.00195569
MARTINEZ_RESPONSE_TO_TRABECTEDIN	0.028286	0.0815475	0.0186347	0.0341247	0.167882	0.0396755	0.0346454	0.167991	4.17e-05	5.17e-06	0.13914
MARTINEZ_RESPONSE_TO_TRABECTEDIN_DN	0.100002	-0.0403738	4.39e-05	0.100258	-0.0339937	0.0226009	0.101164	-0.0541021	9.85e-06	3.4e-09	-0.0428232
MARTINEZ_RESPONSE_TO_TRABECTEDIN_UP	0.314681	0.0367564	3.38e-10	0.3105	0.0352864	9.7e-05	0.305339	0.0613244	3.98e-10	1.88e-20	0.0444557
MARTINEZ_TP53_TARGETS_DN	0.122842	0.00897498	0.00435885	0.122359	0.00660608	0.455911	0.122757	0.0105025	0.0700592	0.00686399	0.00869454
MARTINEZ_TP53_TARGETS_UP	0.0906052	0.00671435	0.403482	0.0927742	0.00648391	0.836347	0.0913228	0.00425246	0.618202	0.79178	0.00581691
MARTORIATI_MDM4_TARGETS_FETAL_LIVER_DN	0.0911355	-0.0109562	0.35952	0.0933604	-0.0230797	0.207579	0.093947	-0.0298717	0.0122119	0.0296233	-0.0213025
MARTORIATI_MDM4_TARGETS_FETAL_LIVER_UP	0.111106	-0.0368034	0.0102975	0.113158	-0.0325796	0.252909	0.109037	-0.0463909	0.00066031	0.00017603	-0.0385913
MARTORIATI_MDM4_TARGETS_NEUROEPITHELIUM_DN	0.0272413	-0.0207037	0.531943	0.0282482	0.0550738	0.00630864	0.0275989	0.018979	0.359054	0.0365208	0.017783
MARTORIATI_MDM4_TARGETS_NEUROEPITHELIUM_UP	0.137261	-0.0099867	0.4791	0.1402	0.021871	0.216445	0.136236	-0.0285662	0.0276864	0.0688546	-0.0055607
MARZEC_IL2_SIGNALING_DN	0	NA	0.684446	0.00372737	-0.237039	0.60054	0.00353878	0.673557	0.18892	0.529656	NA
MARZEC_IL2_SIGNALING_UP	0.0703971	-0.0201191	0.541726	0.0718612	0.00844096	0.750764	0.0758281	0.0590474	0.0052599	0.0557101	0.0157898
MASSARWEH_RESPONSE_TO_ESTRADIOL	0.0603604	-0.0176141	0.403232	0.0604233	-0.0080791	0.536857	0.0597572	-0.0436308	0.258815	0.450161	-0.023108
MASSARWEH_TAMOXIFEN_RESISTANCE_DN	0.0491025	0.0331934	0.00217866	0.0504125	0.0413975	0.0107591	0.0496551	0.0241164	0.0669642	0.00016273	0.0329024
MASSARWEH_TAMOXIFEN_RESISTANCE_UP	0.0445934	0.0182118	0.231707	0.0456875	0.0329043	0.142238	0.0458876	0.0570324	0.00042556	0.00104645	0.0360495
MATSUDA_NATURAL_KILLER_DIFFERENTIATION	0.101668	-0.0068165	0.304297	0.100417	0.00216099	0.695017	0.0997684	-0.0125111	0.0441127	0.154873	-0.0057222
MATTIOLI_MGUS_VS_PCL	0.215647	-0.0196541	0.00425778	0.213098	-0.0127536	0.0540252	0.208715	-0.0454786	2.31e-06	1.33e-07	-0.0259621
MATTIOLI_MULTIPLE_MYELOMA_WITH_14Q32_TRANSLOCATIONS	0.0844525	0.111958	2.2e-09	0.0842588	0.163307	3.66e-09	0.0846569	0.050194	0.0193025	1.53e-16	0.108486
MATZUK_MEIOTIC_AND_DNA_REPAIR	0.0468179	-0.0174911	0.448439	0.0476511	0.0108109	0.956747	0.046612	-0.0408512	0.0358999	0.213805	-0.0158438
MATZUK_SPERMATID_DIFFERENTIATION	0.0696512	0.0388489	0.0205863	0.0673544	0.0255249	0.745026	0.0653988	-0.0419443	0.466061	0.129718	0.00747651
MATZUK_SPERMATOCYTE	0.101128	-0.0065865	0.262185	0.100045	-0.0062679	0.479849	0.0991899	-0.028462	0.0102989	0.0385487	-0.0137722
MATZUK_SPERMATOZOA	0.0540213	0.00434084	0.720412	0.054658	0.0405479	0.0251179	0.0544791	0.0613479	0.00739721	0.00665133	0.0354122
MAYBURD_RESPONSE_TO_L663536_DN	0.173448	0.0553187	1.12e-09	0.167281	0.079473	5.64e-10	0.165218	0.0221428	0.0320921	2.18e-17	0.0523115
MAYBURD_RESPONSE_TO_L663536_UP	0.0630496	-0.0455221	0.0945822	0.0686406	0.0306673	0.940793	0.0708717	-0.0946114	6.44e-05	0.00049212	-0.0364888
MCBRYAN_PUBERTAL_BREAST_3_4WK_DN	0.0689613	0.0287476	0.161214	0.0652249	0.0652334	0.0496511	0.0650624	0.0277318	0.800819	0.120514	0.0405709
MCBRYAN_PUBERTAL_BREAST_3_4WK_UP	0.0400353	-0.0156353	0.509528	0.0386982	-0.085468	6.24e-05	0.0395869	0.0153137	0.791577	0.00170379	-0.0285965
MCBRYAN_PUBERTAL_BREAST_4_5WK_DN	0.0559559	0.00771985	0.990659	0.0543618	-0.0212863	0.108088	0.0547065	-0.0058365	0.755412	0.540052	-0.0064677
MCBRYAN_PUBERTAL_BREAST_4_5WK_UP	0.0862175	0.0196243	0.0255959	0.0825327	-0.0083499	0.387253	0.0839371	0.0207904	0.00541446	0.00317576	0.0106883
MCBRYAN_PUBERTAL_BREAST_5_6WK_DN	0.113641	0.0110246	0.743427	0.115836	0.00182326	0.766486	0.117643	-0.0077798	0.858305	0.963981	0.00168934
MCBRYAN_PUBERTAL_BREAST_5_6WK_UP	0.0416212	-0.0457806	0.00273683	0.042749	0.00024098	0.473746	0.0428774	-0.0821552	2.47e-05	5.35e-06	-0.042565
MCBRYAN_PUBERTAL_BREAST_6_7WK_DN	0.0604687	0.0387889	0.480268	0.0597337	0.0431393	0.367218	0.0604043	0.010933	0.551575	0.58805	0.0309537
MCBRYAN_PUBERTAL_BREAST_6_7WK_UP	0.079227	0.0427945	0.00153678	0.0787345	0.0128812	0.288805	0.0815405	0.03736	0.0302678	0.00100937	0.0310119
MCBRYAN_PUBERTAL_TGFB1_TARGETS_DN	0.0420062	0.0424897	0.00444567	0.0437819	0.180223	4.31e-09	0.0452726	0.129125	1.04e-06	1.55e-14	0.117279
MCBRYAN_PUBERTAL_TGFB1_TARGETS_UP	0.12199	0.0228992	0.0589037	0.119317	0.0106882	0.58556	0.117848	0.0178567	0.283322	0.159662	0.017148
MCCABE_BOUND_BY_HOXC6	0.0418431	0.010449	0.126895	0.0423362	-0.005547	0.944611	0.0423082	0.0123045	0.128705	0.21402	0.00573553
MCCABE_HOXC6_TARGETS_CANCER_UP	0.017976	0.457819	0.00016304	0.0172686	0.267879	0.0673212	0.0192945	0.364632	0.00190937	3.67e-06	0.363443
MCCLUNG_COCAIN_REWARD_4WK	0.0561284	0.0882975	0.00248277	0.0617595	0.109937	0.00994996	0.061019	0.11698	0.00049931	2.28e-06	0.105072
MCCLUNG_COCAINE_REWARD_5D	0.0400089	-0.0091239	0.980492	0.0420924	0.0134747	0.50269	0.0425471	-0.0071545	0.732846	0.916302	-0.0009346
MCCLUNG_CREB1_TARGETS_DN	0.0631008	0.00417276	0.53035	0.0636931	0.00344407	0.734325	0.064984	0.0172982	0.568088	0.80671	0.00830502
MCCLUNG_CREB1_TARGETS_UP	0.10103	-0.0033312	0.828491	0.100849	0.0274977	0.0434673	0.0994782	0.0165213	0.800032	0.312242	0.0135626
MCCLUNG_DELTA_FOSB_TARGETS_2WK	0.0639686	-0.0866554	2.28e-07	0.0650265	-0.03691	0.0598864	0.0620214	-0.11365	1.07e-06	7.86e-12	-0.0790719
MCCLUNG_DELTA_FOSB_TARGETS_8WK	0.0562212	-0.0081607	0.805484	0.0568439	0.00192864	0.768296	0.0558492	-0.0388972	0.15098	0.577436	-0.0150431
MCDOWELL_ACUTE_LUNG_INJURY_DN	0.0255746	-0.0093578	0.981377	0.0260897	0.00790983	0.595981	0.0247187	-0.0151842	0.846588	0.965506	-0.0055441
MCDOWELL_ACUTE_LUNG_INJURY_UP	0.137953	0.0545832	0.00038227	0.138797	0.0714629	0.00011294	0.135159	0.106168	2.37e-08	6.45e-13	0.0774046
MCGARVEY_SILENCED_BY_METHYLATION_IN_COLON_CANCER	0	NA	0.0119728	0	#NAME?	5.31e-10	0	NA	0.0638649	1.77e-10	NA
MCLACHLAN_DENTAL_CARIES_DN	0.0612049	0.123957	1.75e-09	0.0570478	0.00416962	0.42365	0.0587883	0.0969818	8.36e-06	3.53e-12	0.075036
MCLACHLAN_DENTAL_CARIES_UP	0.0602993	0.0521179	1.9e-09	0.059	0.0562242	2.42e-06	0.0598537	0.0624953	6.29e-07	3.38e-18	0.0569458
MCMURRAY_TP53_HRAS_COOPERATION_RESPONSE_DN	0.00082315	0.305503	0.930031	0.00378274	1.01445	0.032023	0.0024946	0.775015	0.132807	0.0863762	0.698323
MCMURRAY_TP53_HRAS_COOPERATION_RESPONSE_UP	0.090414	0.0842988	0.00039904	0.0795076	0.0444983	0.0216254	0.083458	-0.0110742	0.991296	0.00069078	0.039241
MEBARKI_HCC_PROGENITOR_FZD8CRD_DN	0.0150821	0.00737332	0.399867	0.0155691	0.0497698	0.015975	0.0156818	0.0584613	0.0113869	0.00406797	0.0385348
MEBARKI_HCC_PROGENITOR_FZD8CRD_UP	0.0392007	-0.056063	0.032595	0.0400679	0.00026338	0.320104	0.038403	-0.26972	1.28e-05	1.9e-05	-0.108507
MEBARKI_HCC_PROGENITOR_WNT_DN	0.006989	0.0107865	0.831065	0.00736644	-0.161403	0.174387	0.00614954	-0.216492	0.0013427	0.00896092	-0.12237
MEBARKI_HCC_PROGENITOR_WNT_DN_BLOCKED_BY_FZD8CRD	0	NA	0.12294	0	NA	0.734546	0	NA	0.427714	0.368776	NA
MEBARKI_HCC_PROGENITOR_WNT_UP	0.0362645	0.0380928	0.0218866	0.0381568	0.0763235	0.00407429	0.0378093	0.092843	0.00085233	1.15e-05	0.0690864
MEBARKI_HCC_PROGENITOR_WNT_UP_BLOCKED_BY_FZD8CRD	0.0340689	0.0522588	0.0141152	0.0398557	0.206587	8.04e-08	0.0375998	0.146726	2.72e-06	1.83e-12	0.135191
MEBARKI_HCC_PROGENITOR_WNT_UP_CTNNB1_DEPENDENT	0.0372276	0.0973987	2.52e-06	0.0391429	0.165778	1.75e-11	0.0384186	0.159387	4.13e-09	3.07e-22	0.140855
MEBARKI_HCC_PROGENITOR_WNT_UP_CTNNB1_DEPENDENT_BLOCKED_BY_FZD8CRD	0.0288715	0.125021	4.3e-06	0.0373533	0.442537	2.92e-16	0.0324103	0.360785	1.17e-13	4.59e-31	0.309448
MEDINA_SMARCA4_TARGETS	0.0300519	-0.135614	0.00230512	0.0299299	-0.282685	1.55e-06	0.0329584	-0.0962626	0.0223954	2.35e-08	-0.17152
MEISSNER_BRAIN_HCP_WITH_H3_UNMETHYLATED	0.010675	-0.0016517	0.985427	0.00997799	-0.344382	0.00335201	0.0054292	-0.733061	0.00051068	0.00017314	-0.359698
MEISSNER_BRAIN_HCP_WITH_H3K27ME3	0.0161862	0.00374756	0.953395	0.0150377	-0.079748	0.00036705	0.0151217	-0.0513896	0.245583	0.00465659	-0.0424633
MEISSNER_BRAIN_HCP_WITH_H3K4ME2_AND_H3K27ME3	0.0181434	0.130506	1.32e-06	0.0177278	0.148173	0.00408779	0.0175073	0.150141	0.00252334	4.62e-09	0.14294
MEISSNER_BRAIN_HCP_WITH_H3K4ME3_AND_H3K27ME3	0.038552	0.0135681	0.185284	0.0410204	0.0453968	0.0411601	0.0396922	0.0299602	0.0444296	0.0138617	0.0296417
MEISSNER_BRAIN_ICP_WITH_H3K4ME3	0.0385024	-0.0050963	0.0398617	0.0385024	-0.0182623	0.00464987	0.039606	0.0366912	0.275194	0.00304647	0.00444419
MEISSNER_ES_ICP_WITH_H3K4ME3	0.0370895	-0.0050963	0.00767443	0.0370895	-0.0142241	0.00480654	0.0377982	0.023229	0.321173	0.00090845	0.00130285
MEISSNER_NPC_HCP_WITH_H3_UNMETHYLATED	0.0135641	0.0766772	0.0129736	0.0139368	0.112089	0.0410071	0.0127982	0.112173	0.00734698	0.00035562	0.100313
MEISSNER_NPC_HCP_WITH_H3K27ME3	0	NA	0.00070126	0	NA	0.00141415	0	NA	0.0463094	7.38e-06	NA
MEISSNER_NPC_HCP_WITH_H3K4ME2	0.0246123	-0.0008936	0.596544	0.0240807	-0.0553227	0.00018921	0.0244263	-0.0262975	0.0510898	0.00049493	-0.0275046
MEISSNER_NPC_HCP_WITH_H3K4ME2_AND_H3K27ME3	0.0101251	-0.0123971	0.704947	0.010278	-0.0824345	0.00014118	0.0101906	-0.0411579	0.152018	0.00111493	-0.0453298
MEISSNER_NPC_HCP_WITH_H3K4ME3_AND_H3K27ME3	0.00416141	-0.381871	0.00430263	0.00545047	-0.124294	0.173829	0.00529985	-0.244159	0.00979063	0.00060583	-0.250108
MELLMAN_TUT1_TARGETS_DN	0.103268	0.002794	0.776182	0.101921	0.00962202	0.406275	0.0995327	-0.0071586	0.812652	0.842712	0.00175247
MENSE_HYPOXIA_UP	0.0925051	-0.0720518	0.336415	0.0994143	-0.0413531	0.682392	0.0951613	-0.0312099	0.379377	0.55909	-0.0482049
MIDORIKAWA_AMPLIFIED_IN_LIVER_CANCER	0.0867491	-0.0646918	3.67e-11	0.0890632	-0.0489696	0.00129994	0.0841893	-0.0832467	6.95e-05	2.82e-15	-0.065636
MIKKELSEN_ES_HCP_WITH_H3_UNMETHYLATED	0	NA	0.0065285	0	#NAME?	0.014182	0.00138484	-0.743027	0.0720455	0.00055989	NA
MIKKELSEN_ES_ICP_WITH_H3K27ME3	0	NA	0.323962	0	NA	0.468182	0	NA	0.00405449	0.021972	NA
MIKKELSEN_ES_ICP_WITH_H3K4ME3	0.0302153	0.0321924	0.0312799	0.0301695	-0.0285153	0.0465837	0.0306935	0.0613727	3.66e-05	8.42e-06	0.0216832
MIKKELSEN_ES_ICP_WITH_H3K4ME3_AND_H3K27ME3	0.00714375	0.00869322	0.580435	0.00696038	-0.0832706	0.700795	0.00632832	-0.0643623	0.678973	0.860166	-0.0463132
MIKKELSEN_ES_LCP_WITH_H3K4ME3	0.0349155	0.0460761	0.00153727	0.0327069	-0.0119776	0.826728	0.0318616	-0.0036989	0.505185	0.022708	0.0101332
MIKKELSEN_IPS_HCP_WITH_H3_UNMETHYLATED	0.00246936	0.175367	0.680345	0.00541473	1.34792	0.0001156	0.00391229	0.150175	0.38162	0.00197	0.557822
MIKKELSEN_IPS_ICP_WITH_H3K27ME3	0.0029583	Inf	4.43e-08	0.0110656	Inf	5.3e-19	0.0106536	2.61313	3.07e-13	2.84e-35	Inf
MIKKELSEN_IPS_ICP_WITH_H3K4ME3_AND_H327ME3	0.00643795	0.0756211	0.0278557	0.00611751	-0.0233641	0.84787	0.00533513	0.0667928	0.197223	0.0968081	0.0396833
MIKKELSEN_IPS_LCP_WITH_H3K4ME3	0.0358943	0.0303716	0.0213933	0.035066	-0.0177071	0.329095	0.0356299	0.0409448	0.00538187	0.00238731	0.0178697
MIKKELSEN_IPS_WITH_HCP_H3K27ME3	0.0006463	-1.37615	0.0187851	0.00030252	-3	0.00765879	0.00248893	0.0241125	0.533001	0.00424608	-1.45068
MIKKELSEN_MCV6_HCP_WITH_H3K27ME3	0.00545788	-0.0406205	0.524189	0.00540789	-0.0978087	0.140468	0.00566225	-0.0540454	0.562996	0.383429	-0.0641582
MIKKELSEN_MCV6_ICP_WITH_H3K27ME3	0	NA	0.2672	0	NA	0.887971	0	NA	0.926398	0.805065	NA
MIKKELSEN_MCV6_ICP_WITH_H3K4ME3_AND_H3K27ME3	0.0007231	Inf	0.00021448	0.00513862	Inf	0.00063769	0.00283086	Inf	1.02e-07	7.56e-12	Inf
MIKKELSEN_MCV6_LCP_WITH_H3K4ME3	0.0428456	0.0537176	3.21e-05	0.0420449	0.00762233	0.767277	0.0424075	0.0691223	4.37e-05	2.53e-07	0.0434874
MIKKELSEN_MEF_HCP_WITH_H3_UNMETHYLATED	0.00878907	-0.0105661	0.783255	0.00744267	-0.205115	3.61e-06	0.00731862	-0.130447	0.006865	3.43e-06	-0.115376
MIKKELSEN_MEF_HCP_WITH_H3K27ME3	0.00238509	0.160177	0.00165506	0.00249828	0.288469	2.83e-05	0.00267211	0.0331159	0.341322	2.88e-06	0.160588
MIKKELSEN_MEF_ICP_WITH_H3K27ME3	0	NA	0.277226	0	NA	0.132871	0	NA	0.0657846	0.0609652	NA
MIKKELSEN_MEF_ICP_WITH_H3K4ME3_AND_H3K27ME3	0	NA	0.234729	0	NA	0.727574	0	NA	0.772454	0.669762	NA
MIKKELSEN_MEF_LCP_WITH_H3K27ME3	0	NA	0.0388023	0	NA	0.0033881	0	NA	0.840884	0.00570501	NA
MIKKELSEN_MEF_LCP_WITH_H3K4ME3	0.046821	0.092699	4.28e-05	0.0485777	0.0724723	0.00295517	0.0463826	0.130397	8.12e-10	7.35e-14	0.0985226
MIKKELSEN_NPC_HCP_WITH_H3K27ME3	0	#NAME?	2.44e-10	0.00024544	-2.0902	8.45e-06	0.00037806	-1.39985	4.17e-05	8.66e-17	#NAME?
MIKKELSEN_NPC_HCP_WITH_H3K4ME3_AND_H3K27ME3	0.0102199	-0.0733529	0.0487718	0.0111304	-0.120453	0.00033374	0.011564	-0.0258593	0.186977	0.00028724	-0.0732217
MIKKELSEN_NPC_ICP_WITH_H3K4ME3	0.0332696	0.0382722	0.00233687	0.0347782	0.0260966	0.0768304	0.0351511	0.070954	4.29e-07	2.28e-08	0.0451076
MIKKELSEN_NPC_LCP_WITH_H3K4ME3	0.0150273	0.0139176	0.595727	0.016189	-0.0777179	0.0404279	0.0153614	0.0295393	0.757457	0.237518	-0.0114203
MILI_PSEUDOPODIA	0.0969561	-0.0149142	0.171058	0.0936191	-0.112645	7.29e-08	0.0979636	-0.018818	0.0392215	1.23e-07	-0.0487925
MILI_PSEUDOPODIA_CHEMOTAXIS_DN	0.107935	0.0135655	0.0663511	0.11041	0.00571753	0.509047	0.111504	0.0438134	8.57e-05	0.00027511	0.0210322
MILI_PSEUDOPODIA_CHEMOTAXIS_UP	0.120588	-0.0014481	0.919889	0.120164	-0.0214624	0.0074512	0.119041	-0.0254086	0.0689546	0.0179475	-0.0161064
MILI_PSEUDOPODIA_HAPTOTAXIS_DN	0.090728	0.0427171	1.11e-06	0.0909588	0.0598799	1.09e-07	0.0918874	0.0574894	8.37e-09	1.23e-18	0.0533621
MILI_PSEUDOPODIA_HAPTOTAXIS_UP	0.126174	-0.0194063	0.00039904	0.126173	-0.0360362	0.0036795	0.125704	-0.064546	4.68e-11	5.02e-14	-0.0399961
MISHRA_CARCINOMA_ASSOCIATED_FIBROBLAST_DN	0.0855201	0.13709	0.00032977	0.0689937	-0.0889368	0.00134133	0.0718003	-0.0049192	0.652156	3.73e-05	0.0144113
MISHRA_CARCINOMA_ASSOCIATED_FIBROBLAST_UP	0.0675867	-0.0237768	0.888521	0.0672328	-0.166914	0.00671247	0.0709253	0.0797769	0.0223954	0.00664002	-0.0369713
MISSIAGLIA_REGULATED_BY_METHYLATION_DN	0.108685	-0.0794461	0.181909	0.10355	-0.0208365	0.527138	0.0979818	-0.337031	3.2e-07	5.16e-06	-0.145771
MISSIAGLIA_REGULATED_BY_METHYLATION_UP	0.113061	0.0493301	0.00263668	0.10967	0.0451714	0.083088	0.113203	0.153794	9.08e-13	1.37e-13	0.082765
MITSIADES_RESPONSE_TO_APLIDIN_DN	0.106406	-0.0165885	0.424742	0.105349	-0.0075001	0.781769	0.103963	-0.104818	4.29e-07	2.01e-05	-0.0429687
MITSIADES_RESPONSE_TO_APLIDIN_UP	0.0719166	-0.0021717	0.741583	0.0746232	0.0129328	0.871724	0.0742137	0.0665107	9.86e-05	0.0036542	0.0257573
MIYAGAWA_TARGETS_OF_EWSR1_ETS_FUSIONS_DN	0.0300188	0.05616	0.0289466	0.0337988	0.11314	0.00289812	0.032311	0.110225	0.00064595	8.55e-06	0.0931748
MIYAGAWA_TARGETS_OF_EWSR1_ETS_FUSIONS_UP	0.0391119	-0.0018927	0.96178	0.0404423	-0.0177631	0.376804	0.0407581	0.0237109	0.111708	0.378472	0.00135172
MMS_MOUSE_LYMPH_HIGH_4HRS_UP	0.139299	0.00264448	0.764833	0.137247	-0.0427391	0.00118185	0.132865	-0.0416725	0.0116738	0.00082429	-0.0272557
MODY_HIPPOCAMPUS_NEONATAL	0.263467	-0.0388351	7.82e-07	0.256501	-0.0502777	7.6e-05	0.25041	-0.067242	3.24e-10	2.08e-17	-0.0521183
MODY_HIPPOCAMPUS_POSTNATAL	0.161491	0.0094966	0.622758	0.158798	-0.0125742	0.389642	0.158886	0.0145958	0.520591	0.65803	0.00383939
MODY_HIPPOCAMPUS_PRENATAL	0.371095	-0.0206588	0.0455009	0.372754	-0.0014514	0.439172	0.364943	-0.0574361	4.83e-08	2.29e-07	-0.0265154
MOHANKUMAR_HOXA1_TARGETS_DN	0.0468778	-0.0379322	0.0576457	0.0494643	0.0152724	0.754906	0.0489553	0.035672	0.0689546	0.0710585	0.00433742
MOHANKUMAR_HOXA1_TARGETS_UP	0.102461	0.021004	0.00038269	0.102169	0.0430662	1.49e-06	0.102421	0.0190004	0.0765317	1.35e-08	0.0276902
MOLENAAR_TARGETS_OF_CCND1_AND_CDK4_DN	0.0225371	-0.152272	0.0824916	0.0257046	0.0479872	0.799755	0.0246465	-0.229699	0.0196149	0.0385125	-0.111328
MOLENAAR_TARGETS_OF_CCND1_AND_CDK4_UP	0.0298892	0.14234	3.5e-10	0.0301965	0.132188	0.00020847	0.0299821	0.276575	1.66e-13	2.23e-23	0.183701
MONNIER_POSTRADIATION_TUMOR_ESCAPE_DN	0.0798528	0.014655	0.840647	0.079059	-0.036415	0.00214859	0.0777655	0.0417405	0.0344576	0.00358362	0.00666019
MONNIER_POSTRADIATION_TUMOR_ESCAPE_UP	0.0775254	-0.0163981	0.192861	0.0789177	0.0198791	0.548956	0.0796768	-0.0427451	0.015746	0.0464369	-0.013088
MOOTHA_FFA_OXYDATION	0.0720176	0.0840766	0.0229115	0.0592634	-0.135732	0.0386146	0.0645712	0.0809464	0.0246527	0.0015122	0.00976366
MOOTHA_GLUCONEOGENESIS	0.2083	-0.0161215	0.0648447	0.201478	-0.0214461	0.0869378	0.199603	-0.0416486	5.01e-05	3.67e-05	-0.0264054
MOOTHA_HUMAN_MITODB_6_2002	0.194763	0.00268325	0.982772	0.189767	0.0130116	0.72921	0.18206	-0.016009	0.287862	0.788914	-0.0001047
MOOTHA_MITOCHONDRIA	0.180074	8.73e-05	0.751265	0.175785	0.00814804	0.782698	0.167925	-0.0195759	0.326307	0.770119	-0.0037802
MOOTHA_PGC	0.18739	0.00159108	0.801564	0.182741	0.0108303	0.0492609	0.178851	0.0034257	0.867449	0.344779	0.00528236
MOOTHA_VOXPHOS	0.431591	0.0199351	0.0337515	0.430038	0.0438204	0.00455166	0.399815	0.00788948	0.510095	0.00432133	0.0238817
MOREAUX_B_LYMPHOCYTE_MATURATION_BY_TACI_DN	0.158659	-0.0278193	0.0517703	0.148221	-0.0307593	0.997819	0.148138	-0.0817567	9.92e-05	0.00044769	-0.0467784
MOREAUX_B_LYMPHOCYTE_MATURATION_BY_TACI_UP	0.0519231	-0.0027612	0.995003	0.0515473	-0.0089429	0.52824	0.0533488	0.024111	0.260197	0.67951	0.00413564
MOREAUX_MULTIPLE_MYELOMA_BY_TACI_DN	0.109872	-0.0612003	7.85e-08	0.108749	-0.0314908	0.0984807	0.105361	-0.0991837	8.77e-09	4.96e-14	-0.0639583
MOREAUX_MULTIPLE_MYELOMA_BY_TACI_UP	0.0402749	0.0355162	4.62e-05	0.040149	0.0118129	0.208255	0.0416782	0.0558419	5.16e-06	1.52e-08	0.0343903
MOREIRA_RESPONSE_TO_TSA_UP	0.330064	-0.0250313	0.00061747	0.31554	-0.0548816	1.8e-09	0.311752	-0.0427384	2.8e-07	2.95e-16	-0.0408838
MORI_EMU_MYC_LYMPHOMA_BY_ONSET_TIME_UP	0.0890115	-0.0521499	0.00984995	0.0849229	-0.0416112	0.258884	0.0840969	-0.130939	2.38e-08	1.83e-08	-0.0749001
MORI_IMMATURE_B_LYMPHOCYTE_DN	0.154258	-0.0477628	0.0650193	0.151348	-0.0088377	0.42246	0.144222	-0.261153	8.33e-07	3.97e-06	-0.105918
MORI_IMMATURE_B_LYMPHOCYTE_UP	0.0757573	0.0501936	0.0001463	0.0772464	0.119853	1.05e-07	0.0746095	0.0597062	7.45e-05	7.19e-13	0.0765844
MORI_LARGE_PRE_BII_LYMPHOCYTE_DN	0.0410485	0.0661893	0.0141152	0.0424033	0.0364201	0.332337	0.0420691	0.0619351	0.0182494	0.00464204	0.0548481
MORI_LARGE_PRE_BII_LYMPHOCYTE_UP	0.162861	-0.0357442	0.227579	0.159001	0.00739131	0.738768	0.150646	-0.226875	5.15e-06	9.72e-05	-0.085076
MORI_MATURE_B_LYMPHOCYTE_DN	0.167235	-0.003364	0.794282	0.166165	0.0519883	0.0044084	0.159493	-0.0533906	0.0197428	0.00390328	-0.0015887
MORI_MATURE_B_LYMPHOCYTE_UP	0.0274864	-0.013048	0.714173	0.0295273	-0.0241984	0.996091	0.029355	-0.0222572	0.812592	0.981704	-0.0198346
MORI_PLASMA_CELL_DN	0.0584892	-0.0326162	0.199753	0.0567966	-0.0184593	0.559803	0.0589489	0.0174936	0.499808	0.449587	-0.011194
MORI_PLASMA_CELL_UP	0.153429	0.0774245	1.35e-06	0.144767	0.0830793	0.00040707	0.146057	0.0785182	2.65e-05	7.89e-12	0.079674
MORI_PRE_BI_LYMPHOCYTE_DN	0.0647577	0.062297	0.0106246	0.0639981	0.0245787	0.362182	0.0648356	0.0900929	0.000279	0.00011724	0.0589896
MORI_PRE_BI_LYMPHOCYTE_UP	0.163236	-0.0421666	0.143781	0.160835	0.00305394	0.756841	0.156994	-0.152426	5.68e-06	7.26e-05	-0.0638462
MORI_SMALL_PRE_BII_LYMPHOCYTE_DN	0.130381	-0.0070518	0.82735	0.132571	0.0278542	0.0128987	0.133139	-0.0236487	0.128376	0.0401771	-0.0009488
MORI_SMALL_PRE_BII_LYMPHOCYTE_UP	0.0565774	0.0302007	0.0130884	0.0559914	-0.014497	0.977747	0.0557857	0.0525265	0.00177256	0.00156231	0.0227434
MOSERLE_IFNA_RESPONSE	0.0523414	0.0184382	0.114815	0.0516018	-0.0295338	0.778104	0.0530997	0.0794729	0.023568	0.0550711	0.0227924
MUELLER_COMMON_TARGETS_OF_AML_FUSIONS_DN	0.0441206	-0.106501	0.00841485	0.0464627	-0.0202981	0.51221	0.0451841	-0.117559	0.0324381	0.00688718	-0.0814527
MUELLER_METHYLATED_IN_GLIOBLASTOMA	0.106991	0.0918014	6.22e-08	0.118347	0.231889	3.43e-21	0.112359	0.0841747	5.92e-06	3.72e-30	0.135955
MUELLER_PLURINET	0.144099	-0.0449635	0.00156372	0.135867	-0.0476581	0.312109	0.137155	-0.10245	4.42e-08	7.06e-09	-0.0650238
MULLIGAN_NTF3_SIGNALING_VIA_INSR_AND_IGF1R_UP	0.216275	-0.0419639	0.342507	0.212336	0.0857433	0.0204767	0.203042	-0.130549	0.00327765	0.00157965	-0.0289231
MULLIGHAN_MLL_SIGNATURE_1_DN	0.0613976	-0.0023184	0.613821	0.0620961	0.00084985	0.908493	0.0631347	0.0269922	0.0313909	0.231547	0.00850787
MULLIGHAN_MLL_SIGNATURE_1_UP	0.0837821	0.0143406	0.00734101	0.0839716	0.0260498	0.0006556	0.0840579	0.0218939	4.76e-05	6.17e-08	0.0207614
MULLIGHAN_MLL_SIGNATURE_2_DN	0.0732083	0.0123525	0.195604	0.0735104	-0.0094792	0.973216	0.0745149	0.0193389	0.0865699	0.223033	0.00740405
MULLIGHAN_MLL_SIGNATURE_2_UP	0.0723615	0.0313092	9.03e-09	0.0730908	0.0449307	5.17e-07	0.0732781	0.048411	2.44e-10	1.79e-21	0.0415503
MULLIGHAN_NPM1_MUTATED_SIGNATURE_1_DN	0.0835678	-0.0327566	5.3e-05	0.0826667	-0.0093331	0.679368	0.0801526	-0.0132486	0.305833	0.00085493	-0.0184461
MULLIGHAN_NPM1_MUTATED_SIGNATURE_1_UP	0.0574536	0.0264829	0.00054746	0.0558785	-0.0013763	0.464586	0.0582203	0.0159893	0.576309	0.00715228	0.0136987
MULLIGHAN_NPM1_MUTATED_SIGNATURE_2_DN	0.138587	-0.0350222	1.61e-05	0.137488	0.00344485	0.830957	0.131877	-0.0361609	0.0016339	3.8e-06	-0.0225794
MULLIGHAN_NPM1_MUTATED_SIGNATURE_2_UP	0.0410292	0.0195919	0.108928	0.0433065	0.0774846	0.00810825	0.0436882	-0.0135896	0.640612	0.0206132	0.027829
MULLIGHAN_NPM1_SIGNATURE_3_DN	0.0920081	-0.0082863	0.289275	0.0905869	0.0189364	0.228989	0.0878052	-0.0072168	0.709857	0.410509	0.00114443
MULLIGHAN_NPM1_SIGNATURE_3_UP	0.058099	0.0122016	0.0484794	0.0567934	-0.013465	0.663126	0.0583464	0.00137091	0.655399	0.259356	3.58e-05
MUNSHI_MULTIPLE_MYELOMA_UP	0.283069	0.0433851	1.89e-11	0.272554	0.0328987	0.00080602	0.271499	0.0424859	1.06e-05	1.58e-16	0.0395899
MURAKAMI_UV_RESPONSE_6HR_UP	0.210564	0.0257115	0.00279417	0.219298	0.0680875	1.9e-05	0.205019	0.035327	0.00206123	3.15e-08	0.043042
NABA_BASEMENT_MEMBRANES	0.0163681	0.210301	0.00244896	0.0187613	0.221653	0.0509664	0.0193284	0.254309	0.00058605	1.11e-05	0.228754
NABA_COLLAGENS	0.0193397	0.376332	0.00030047	0.0230906	0.444495	0.00013503	0.0212726	0.456247	0.00023467	3.32e-09	0.425691
NABA_CORE_MATRISOME	0.0315986	0.125613	5.86e-08	0.0335644	0.16484	2.41e-07	0.0330761	0.137332	7.39e-10	1.52e-20	0.142595
NABA_ECM_AFFILIATED	0.0517913	-0.011568	0.459516	0.0534655	0.0225031	0.211417	0.0508066	0.029535	0.0041217	0.0157856	0.01349
NABA_ECM_GLYCOPROTEINS	0.0381151	0.0863368	2.27e-08	0.0401622	0.125387	5.29e-07	0.0414607	0.161324	1.59e-10	2.95e-21	0.124349
NABA_ECM_REGULATORS	0.0367359	0.0254668	0.160661	0.0368247	0.0420249	0.42365	0.0364821	0.0962903	0.00070345	0.00289272	0.054594
NABA_MATRISOME	0.044667	0.0308825	0.00356178	0.0467402	0.0615292	0.0237756	0.0456486	0.0972967	5.08e-08	1.59e-09	0.0632361
NABA_MATRISOME_ASSOCIATED	0.042948	0.0042413	0.284128	0.0436679	0.0206443	0.857096	0.0432449	0.0821528	1.15e-05	0.00026739	0.0356795
NABA_PROTEOGLYCANS	0	NA	0.622907	0	NA	0.0110863	0	NA	0.709922	0.100299	NA
NABA_SECRETED_FACTORS	0.030911	0.0365177	0.0793658	0.0304387	-0.0369417	0.242465	0.0309869	0.0743769	0.0001015	0.0001964	0.024651
NADERI_BREAST_CANCER_PROGNOSIS_UP	0.0382677	-0.0263332	0.107379	0.0335116	-0.119122	0.0746313	0.0373845	-0.153503	0.00017826	0.00015004	-0.0996526
NADLER_HYPERGLYCEMIA_AT_OBESITY	0.0829374	-0.0548909	0.00017834	0.0834372	0.0157427	0.382779	0.0769339	-0.0408747	0.0611894	0.00037632	-0.0266743
NADLER_OBESITY_DN	0.171609	0.00710107	0.658815	0.168157	0.00892528	0.70882	0.167566	0.00958857	0.212025	0.592723	0.00853831
NADLER_OBESITY_UP	0.196774	0.0237735	0.0476931	0.199133	0.0546615	0.00013258	0.197356	0.0656907	9.23e-07	2.11e-09	0.0480419
NAGASHIMA_EGF_SIGNALING_UP	0.185532	-0.0058191	0.607798	0.192322	0.00558286	0.791432	0.191537	0.0978324	0.00140811	0.0236547	0.032532
NAGASHIMA_NRG1_SIGNALING_DN	0.0277575	-0.0518628	0.355786	0.0323877	-0.0734129	0.414734	0.0332718	0.0312758	0.998185	0.699572	-0.0313333
NAGASHIMA_NRG1_SIGNALING_UP	0.10846	-0.0244809	0.720412	0.11356	0.00011688	0.934924	0.111504	0.064898	0.0068683	0.0963462	0.0135113
NAKAJIMA_MAST_CELL	0.120677	-0.0218175	0.0527044	0.12074	-0.0136678	0.767277	0.119987	0.0253473	0.0496145	0.0531732	-0.0033793
NAKAMURA_ADIPOGENESIS_EARLY_DN	0.0947595	0.090612	5.83e-09	0.10177	0.165097	2.8e-16	0.10197	0.149007	1.93e-11	1.02e-31	0.134905
NAKAMURA_ADIPOGENESIS_EARLY_UP	0.0471383	-0.0150113	0.72717	0.0478599	0.0634061	0.038648	0.0488746	0.105423	5.57e-05	0.00016229	0.0512727
NAKAMURA_ADIPOGENESIS_LATE_DN	0.109392	0.0417081	3.96e-06	0.114861	0.094132	2.07e-10	0.114173	0.0642063	2.33e-08	2.73e-20	0.0666821
NAKAMURA_ADIPOGENESIS_LATE_UP	0.0549591	0.0299071	0.0007692	0.0580122	0.101493	3.12e-07	0.0570681	0.034114	0.00485264	4.73e-10	0.0551715
NAKAMURA_CANCER_MICROENVIRONMENT_DN	0.0637464	-0.0523129	0.0489849	0.0649364	0.0789248	0.106889	0.0640504	-0.122234	0.00209298	0.00085089	-0.031874
NAKAMURA_METASTASIS	0.0569153	-0.0159292	0.955354	0.0614809	0.0146937	0.534087	0.0635012	0.0495723	0.0138446	0.12869	0.0161123
NAKAMURA_METASTASIS_MODEL_DN	0.0283814	-0.178237	4.88e-14	0.03096	-0.147887	0.00082475	0.028585	-0.20033	3.12e-09	2.13e-22	-0.175485
NAKAMURA_METASTASIS_MODEL_UP	0.0602614	-0.01183	0.598975	0.0579865	-0.0885313	0.055539	0.0579771	-0.0519349	0.147556	0.100385	-0.0507654
NAKAMURA_TUMOR_ZONE_PERIPHERAL_VS_CENTRAL_DN	0.100769	0.00252673	0.588031	0.101992	-6.79e-05	0.679317	0.102211	0.0188761	0.127601	0.428478	0.00711166
NAKAMURA_TUMOR_ZONE_PERIPHERAL_VS_CENTRAL_UP	0.139648	-0.0034835	0.395561	0.136376	0.0180874	0.226936	0.131548	-0.0476832	5.14e-05	0.0004093	-0.0110265
NAKAYAMA_FRA2_TARGETS	0.0660933	-0.0314996	0.301072	0.0737612	-0.0200995	0.755315	0.0733201	0.0880887	0.00562646	0.0381897	0.0121632
NAKAYAMA_SOFT_TISSUE_TUMORS_PCA1_DN	0.0121944	0.205439	3.1e-06	0.0127627	0.386916	5.07e-11	0.0123426	0.153769	0.00271038	3.99e-16	0.248708
NAKAYAMA_SOFT_TISSUE_TUMORS_PCA1_UP	0.0543419	0.056498	0.00409989	0.0569975	0.102993	0.00092201	0.0544116	0.0900967	1.68e-05	1.9e-08	0.0831958
NAKAYAMA_SOFT_TISSUE_TUMORS_PCA2_DN	0.0201315	0.0776945	0.00906183	0.0171309	-0.172611	0.0269295	0.0201371	0.0680954	0.115065	0.00186449	-0.0089403
NAKAYAMA_SOFT_TISSUE_TUMORS_PCA2_UP	0.0490988	-0.0457329	0.757954	0.0507282	0.0189885	0.951764	0.0445662	-0.355152	8.84e-05	0.00365601	-0.127299
NATSUME_RESPONSE_TO_INTERFERON_BETA_DN	0.342208	0.0107032	0.000486	0.338764	0.0293266	1.56e-07	0.337128	0.0235838	0.00010326	4.39e-12	0.0212045
NATSUME_RESPONSE_TO_INTERFERON_BETA_UP	0.095692	-0.0009594	0.844078	0.0939037	0.0260179	0.283284	0.0935102	-0.0076583	0.850847	0.785336	0.00580005
NELSON_RESPONSE_TO_ANDROGEN_UP	0.112137	0.0508262	1.13e-06	0.111225	0.0567945	0.00379115	0.111651	0.0871118	6.25e-07	1.6e-12	0.0649108
NEMETH_INFLAMMATORY_RESPONSE_LPS_DN	0.082949	0.111336	0.00015045	0.0867684	0.144638	6.58e-05	0.0887431	0.11167	0.00050201	1.82e-09	0.122548
NEMETH_INFLAMMATORY_RESPONSE_LPS_UP	0.0866475	-0.0165794	0.388112	0.0870259	-0.0457536	0.199373	0.0892217	0.0697957	0.00805038	0.0221895	0.00248753
NEWMAN_ERCC6_TARGETS_DN	0.0113308	-0.470381	1.48e-05	0.0155973	-0.378871	0.00306749	0.0167114	-0.0599427	0.95743	7.05e-06	-0.303065
NGUYEN_NOTCH1_TARGETS_DN	0.0892525	-0.0162806	0.751719	0.0900024	0.0117567	0.64029	0.0945118	0.00029731	0.83601	0.935429	-0.0014089
NGUYEN_NOTCH1_TARGETS_UP	0.127796	0.0104963	0.425588	0.124227	0.0319976	0.143634	0.122442	0.0372378	0.211221	0.191212	0.0265772
NICK_RESPONSE_TO_PROC_TREATMENT_DN	0.0323304	-0.133189	0.0015937	0.0310914	-0.330117	1.77e-09	0.0366962	-0.0800762	0.0423371	5.66e-11	-0.181128
NIKOLSKY_BREAST_CANCER_11Q12_Q14_AMPLICON	0.0351117	0.0274269	0.11649	0.0347241	0.0914053	0.00400051	0.0346557	0.133664	7.76e-10	1.59e-10	0.0841655
NIKOLSKY_BREAST_CANCER_12Q13_Q21_AMPLICON	0.0413759	-0.0285753	0.214834	0.0408686	-0.0093945	0.68804	0.0399519	-0.051457	0.00972727	0.0416405	-0.0298089
NIKOLSKY_BREAST_CANCER_16P13_AMPLICON	0.066975	0.154174	1.09e-47	0.0619142	0.14658	7.32e-22	0.0649479	0.12445	7.75e-25	1.41e-88	0.141735
NIKOLSKY_BREAST_CANCER_16Q24_AMPLICON	0.102352	0.0815176	1.52e-17	0.0968217	0.0256507	0.0320031	0.10253	0.0670103	1e-10	1.07e-25	0.0580595
NIKOLSKY_BREAST_CANCER_17Q11_Q21_AMPLICON	0.0574032	-0.0082632	0.173455	0.0558031	-0.0592454	8.01e-06	0.0565945	-0.0382412	0.00109819	3.47e-07	-0.0352499
NIKOLSKY_BREAST_CANCER_17Q21_Q25_AMPLICON	0.0658224	-0.0087291	0.214834	0.0665019	0.00160908	0.953295	0.064565	-0.0244235	0.109853	0.269813	-0.0105145
NIKOLSKY_BREAST_CANCER_1Q21_AMPLICON	0.0672135	0.0923771	0.00046978	0.0637969	0.0982536	0.00588792	0.0577683	-0.0580481	0.249065	7.98e-05	0.0441942
NIKOLSKY_BREAST_CANCER_20Q11_AMPLICON	0.0821686	-0.06515	7.84e-07	0.076008	-0.23897	6.01e-13	0.0759962	-0.0109576	0.602501	2.71e-16	-0.105026
NIKOLSKY_BREAST_CANCER_20Q12_Q13_AMPLICON	0.0605481	-0.0746959	8.64e-18	0.0606742	-0.1275	3.86e-17	0.0601373	-0.0279911	0.04495	4.94e-32	-0.076729
NIKOLSKY_BREAST_CANCER_7P22_AMPLICON	0.0444363	0.00033932	0.857304	0.0457424	0.0212459	0.83849	0.0459304	0.00197037	0.642643	0.95648	0.00785186
NIKOLSKY_BREAST_CANCER_7Q21_Q22_AMPLICON	0.0770868	-0.0151169	0.175544	0.0747916	-0.0674617	0.00010388	0.0766521	-0.0456006	0.00124078	3.93e-06	-0.0427264
NIKOLSKY_BREAST_CANCER_8P12_P11_AMPLICON	0.0598016	-0.15089	2.51e-10	0.0610511	-0.118967	6.09e-05	0.0662893	-0.0341079	0.0134594	1.42e-13	-0.101322
NIKOLSKY_BREAST_CANCER_8Q12_Q22_AMPLICON	0.0760999	-0.0034237	0.576187	0.075457	-0.0025584	0.642475	0.0727449	-0.0462644	9.2e-05	0.00218561	-0.0174155
NIKOLSKY_BREAST_CANCER_8Q23_Q24_AMPLICON	0.0446689	-0.211489	7.18e-71	0.0453228	-0.23286	1.65e-39	0.0455424	-0.184559	3.9e-29	2.33e-133	-0.209636
NIKOLSKY_MUTATED_AND_AMPLIFIED_IN_BREAST_CANCER	0.0384269	-0.0164403	0.716815	0.0386331	-0.0187728	0.61461	0.0378179	-0.0516118	0.0560306	0.285169	-0.0289416
NOJIMA_SFRP2_TARGETS_DN	0.138867	0.0020611	0.75073	0.129348	-0.0923983	0.00368024	0.136969	5.27e-07	0.709321	0.052271	-0.0301122
NOJIMA_SFRP2_TARGETS_UP	0.086874	-0.0781574	6.79e-05	0.0947232	-0.020676	0.267618	0.0969641	-0.0047014	0.45671	0.00067325	-0.0345116
NOUSHMEHR_GBM_SILENCED_BY_METHYLATION	0.0567204	-0.090518	4.65e-07	0.0642781	0.0956247	3.53e-06	0.0595874	-0.0668155	0.00829968	7.38e-12	-0.0205696
NOUZOVA_METHYLATED_IN_APL	0.0133762	-0.0168555	0.897507	0.012333	-0.0314175	0.921433	0.0154055	0.130161	0.224717	0.761738	0.027296
NOUZOVA_TRETINOIN_AND_H4_ACETYLATION	0.0764454	-0.0730885	1.11e-15	0.0784496	-0.0628898	5.55e-05	0.0768123	-0.0403774	0.00037659	3.26e-20	-0.0587852
NUNODA_RESPONSE_TO_DASATINIB_IMATINIB_UP	0.0917339	0.00887333	0.747171	0.0875031	0.00849253	0.993199	0.0862436	-0.0063272	0.836852	0.987339	0.00367954
NUTT_GBM_VS_AO_GLIOMA_DN	0.228898	-0.0107859	0.00409989	0.227803	0.00225634	0.862856	0.225374	-0.0025615	0.226142	0.0268447	-0.003697
NUTT_GBM_VS_AO_GLIOMA_UP	0.245958	0.0164624	0.0078854	0.244711	0.0443819	0.00018091	0.241878	0.00730356	0.235259	4.26e-05	0.022716
NUYTTEN_EZH2_TARGETS_DN	0.088289	-0.0357589	0.0141152	0.086635	-0.0236348	0.417	0.0859683	-0.0820167	5.22e-06	5.16e-06	-0.0471368
NUYTTEN_EZH2_TARGETS_UP	0.0911155	0.00914843	0.144649	0.0948088	0.0250412	0.0995733	0.0948567	0.0554122	0.00047961	0.0005767	0.0298673
NUYTTEN_NIPP1_TARGETS_DN	0.0940828	-0.0027132	0.411885	0.0941738	-0.0078469	0.394161	0.0939404	-0.0193271	0.0207985	0.0772703	-0.0099624
NUYTTEN_NIPP1_TARGETS_UP	0.0654918	-0.0104208	0.17491	0.0666158	-0.0146782	0.28349	0.0666297	-0.0024062	0.607353	0.320347	-0.0091684
ODONNELL_METASTASIS_UP	0.00616732	0.469114	0.00689825	0.00650422	0.117512	0.659926	0.0055279	-2.92e-08	0.91081	0.0892746	0.195542
ODONNELL_TARGETS_OF_MYC_AND_TFRC_DN	0.0666429	-0.110758	0.116604	0.0721668	0.0681255	0.950798	0.0657157	-0.346904	1.48e-06	2.27e-05	-0.129845
ODONNELL_TARGETS_OF_MYC_AND_TFRC_UP	0.0353416	-0.0726357	0.00334295	0.0371151	-0.132773	0.00060518	0.0376857	0.0486312	0.743464	0.00015686	-0.0522591
ODONNELL_TFRC_TARGETS_DN	0.0366645	-0.13287	0.0316993	0.04084	0.0161301	0.485617	0.0374213	-0.382322	4.69e-07	1.41e-06	-0.166354
ODONNELL_TFRC_TARGETS_UP	0.0516265	-0.0040348	0.978453	0.0536896	0.00306644	0.71444	0.053969	0.0631645	0.00092572	0.022845	0.0207321
OHGUCHI_LIVER_HNF4A_TARGETS_DN	0.0112686	0.0633255	0.00319157	0.0118968	0.111352	0.00262294	0.011993	0.0719096	0.0140053	1.69e-05	0.0821958
OHGUCHI_LIVER_HNF4A_TARGETS_UP	0.038201	-0.0163092	0.202292	0.0392085	-0.0120942	0.989343	0.0400945	0.0207765	0.273034	0.444365	-0.0025423
OHM_METHYLATED_IN_ADULT_CANCERS	0.0348378	0.0497101	0.213325	0.0324484	0.0616288	0.0509664	0.0350442	0.140178	0.00306663	0.00214865	0.0838389
OISHI_CHOLANGIOMA_STEM_CELL_LIKE_DN	0.047391	0.0384674	0.0189547	0.0518802	0.0820932	0.00498273	0.0494517	0.0699414	4.53e-05	8.81e-07	0.0635007
OISHI_CHOLANGIOMA_STEM_CELL_LIKE_UP	0.0642661	-0.0154111	0.0287025	0.0622779	-0.0361322	0.00383232	0.062907	-0.0336358	0.00094907	1.53e-05	-0.0283931
OKUMURA_INFLAMMATORY_RESPONSE_LPS	0.0505849	-0.0027984	0.921705	0.0514278	-0.0150429	0.341005	0.0513181	0.00385782	0.911226	0.868388	-0.0046612
OLSSON_E2F3_TARGETS_DN	0.130334	-0.042441	0.0807287	0.128308	-0.0438027	0.213605	0.132006	0.0155472	0.936164	0.220181	-0.0235655
OLSSON_E2F3_TARGETS_UP	0.0477874	-0.25044	1.37e-09	0.0433421	-0.321255	1.98e-12	0.0435105	-0.200857	3.94e-05	1.82e-22	-0.257518
ONDER_CDH1_SIGNALING_VIA_CTNNB1	0.0258271	-0.128972	0.00201895	0.0280809	-0.0796695	0.41843	0.0302779	0.019347	0.775388	0.0230582	-0.0630983
ONDER_CDH1_TARGETS_1_DN	0.110356	-0.012321	0.634256	0.108061	-0.017962	0.51632	0.109968	-0.0490108	0.00170271	0.0203837	-0.0264313
ONDER_CDH1_TARGETS_1_UP	0.0550747	0.0808004	4.83e-06	0.054042	0.062818	0.0310709	0.0561884	0.140626	1.66e-13	2.66e-17	0.0947483
ONDER_CDH1_TARGETS_2_DN	0.0279462	0.00516802	0.636379	0.0276591	-0.0300783	0.32334	0.0288098	0.0147179	0.60001	0.65184	-0.0033975
ONDER_CDH1_TARGETS_2_UP	0.0514651	0.12202	1.12e-06	0.0525339	0.0961225	0.00024806	0.053248	0.16578	4.31e-12	1.45e-18	0.127974
ONDER_CDH1_TARGETS_3_DN	0.026831	0.124305	0.0032242	0.0160067	-0.374449	0.00046366	0.0195486	-0.0537333	0.525353	8.94e-05	-0.101292
ONGUSAHA_TP53_TARGETS	0.0474238	0.143408	1.06e-06	0.0459926	0.141018	0.00987471	0.0487044	0.16174	0.00012527	5.26e-10	0.148722
ONKEN_UVEAL_MELANOMA_DN	0.137937	-0.0038578	0.376058	0.137583	0.00403225	0.0830347	0.137186	-0.0054674	0.0908699	0.0682785	-0.0017643
ONKEN_UVEAL_MELANOMA_UP	0.135148	-0.0081513	0.175337	0.13527	-0.012799	0.0623865	0.134969	-0.0074184	0.0750302	0.0273697	-0.0094562
ONO_AML1_TARGETS_DN	0.0274717	0.0976107	0.0176264	0.0253782	-0.0122976	0.566081	0.0272544	0.00523636	0.708523	0.128758	0.0301831
ONO_AML1_TARGETS_UP	0.113918	0.00755377	0.557729	0.115027	0.00363429	0.812017	0.117246	0.0523793	0.00062103	0.011982	0.0211891
ONO_FOXP3_TARGETS_DN	0.0261428	-0.0673553	0.13397	0.024086	-0.201684	0.00014286	0.0256814	-0.233763	2.77e-05	1.33e-07	-0.167601
ONO_FOXP3_TARGETS_UP	0.114802	0.0191192	0.0994082	0.115702	0.0189698	0.2181	0.116732	0.052615	0.00010148	0.00021755	0.0302347
OSADA_ASCL1_TARGETS_DN	0.0927876	0.142327	7.82e-05	0.0971681	0.125292	0.00508504	0.0984513	0.194777	1.28e-07	2.55e-11	0.154132
OSADA_ASCL1_TARGETS_UP	0.004921	-0.861087	0.0001113	0.00865019	-0.305161	0.116815	0.0102649	0.0550717	0.683322	0.00071317	-0.370392
OSMAN_BLADDER_CANCER_DN	0.168739	-0.0041706	0.0323077	0.170153	-0.0089819	0.0149935	0.169759	-0.0018192	0.319334	0.0074662	-0.0049905
OSMAN_BLADDER_CANCER_UP	0.109028	-0.0129653	0.0487794	0.110643	-0.011279	0.279943	0.110862	-0.004698	0.268194	0.0818299	-0.0096475
OSWALD_HEMATOPOIETIC_STEM_CELL_IN_COLLAGEN_GEL_DN	0.0916949	-0.0310202	0.00094602	0.0918069	-0.0259073	0.126002	0.0917871	-0.0283517	0.00764205	0.00010169	-0.0284264
OSWALD_HEMATOPOIETIC_STEM_CELL_IN_COLLAGEN_GEL_UP	0.102658	-0.0005674	0.993665	0.103991	-0.0007463	0.956858	0.105418	0.0758083	0.00184976	0.0482968	0.0248315
OUELLET_CULTURED_OVARIAN_CANCER_INVASIVE_VS_LMP_DN	0.0435836	-0.102689	0.00276595	0.0346742	-0.529699	1.07e-19	0.0436544	-0.0756849	0.318714	1.26e-19	-0.236024
OUELLET_CULTURED_OVARIAN_CANCER_INVASIVE_VS_LMP_UP	0.155	0.0293839	0.00220743	0.147312	-0.0012794	0.838332	0.145428	-0.0323643	0.0120884	0.00154435	-0.00142
OUELLET_OVARIAN_CANCER_INVASIVE_VS_LMP_UP	0.30263	-0.0082783	0.466269	0.294679	0.00702003	0.40684	0.288335	-0.032905	0.000913	0.00816925	-0.0113877
OUILLETTE_CLL_13Q14_DELETION_DN	0.0108271	0.173431	0.00539771	0.0123618	0.251305	0.00272295	0.0133569	0.0841549	0.05113	8.61e-05	0.16963
OUILLETTE_CLL_13Q14_DELETION_UP	0.0619119	0.0316311	0.0482532	0.0645045	0.0433588	0.242465	0.0631909	0.00516224	0.618474	0.130788	0.0267174
OUYANG_PROSTATE_CANCER_PROGRESSION_UP	0.171819	0.103135	4.11e-10	0.174177	0.164705	2.8e-12	0.174008	0.132375	9.05e-13	3.09e-30	0.133405
OZEN_MIR125B1_TARGETS	0.0363542	-0.109967	8.89e-11	0.0384253	-0.0411336	0.0352871	0.0392672	-0.082943	0.00011256	2.36e-13	-0.0780145
PACHER_TARGETS_OF_IGF1_AND_IGF2_UP	0.0639887	-0.0431822	0.156311	0.0535828	-0.172922	0.00040458	0.06191	-0.0961694	0.00374765	3.14e-05	-0.104091
PAL_PRMT5_TARGETS_UP	0.149356	-0.0032936	0.710499	0.142986	0.0161121	0.455647	0.135216	-0.112341	0.000436	0.00693969	-0.033174
PANGAS_TUMOR_SUPPRESSION_BY_SMAD1_AND_SMAD5_DN	0.0482642	-0.0128423	0.377881	0.0484868	-0.0198189	0.576175	0.048682	-0.0259137	0.256126	0.449069	-0.019525
PANGAS_TUMOR_SUPPRESSION_BY_SMAD1_AND_SMAD5_UP	0.0413329	0.0492108	0.00178653	0.0433704	0.0465839	0.0263955	0.0415886	0.0386054	0.02224	0.00011489	0.0448
PAPASPYRIDONOS_UNSTABLE_ATEROSCLEROTIC_PLAQUE_DN	0.0703988	0.0114522	0.593831	0.0760653	0.0778678	0.0793996	0.0777078	0.0974075	7.67e-05	0.00033298	0.0622425
PAPASPYRIDONOS_UNSTABLE_ATEROSCLEROTIC_PLAQUE_UP	0.0653353	0.083144	4.28e-05	0.0669096	0.116814	0.00032749	0.0689213	0.191251	1.61e-10	1.96e-15	0.130403
PARENT_MTOR_SIGNALING_DN	0.0577369	-0.0104052	0.655121	0.0474767	-0.210551	1.55e-08	0.0478215	-0.122323	0.00035998	1.37e-09	-0.114427
PARENT_MTOR_SIGNALING_UP	0.0601517	-0.0001796	0.734682	0.0614071	-0.0100504	0.231032	0.0624662	0.0252168	0.0281478	0.0985246	0.00499559
PARK_APL_PATHOGENESIS_DN	0.0746949	0.0927726	1.29e-05	0.072991	0.0468046	0.0255181	0.0763909	0.0833341	0.00081836	7.16e-08	0.0743038
PARK_HSC_AND_MULTIPOTENT_PROGENITORS	0.18414	-0.0305817	0.00331477	0.176234	-0.0252871	0.0793368	0.172662	-0.0845223	7.95e-08	6.86e-09	-0.0467971
PARK_HSC_MARKERS	0.111881	0.0152597	0.608529	0.116179	0.00658782	0.83844	0.113468	0.0185662	0.931796	0.960345	0.0134712
PARK_TRETINOIN_RESPONSE_AND_PML_RARA_FUSION	0.0916992	0.0128939	0.262571	0.0919002	0.00781749	0.753911	0.0977652	0.135655	3.49e-06	8e-05	0.0521221
PARK_TRETINOIN_RESPONSE_AND_RARA_PLZF_FUSION	0.0555359	-0.0371105	0.440138	0.0608419	0.0528062	0.621483	0.0613403	0.00340753	0.89529	0.831823	0.00636774
PASINI_SUZ12_TARGETS_DN	0.140176	0.0306472	0.0137892	0.143031	0.0456181	0.00819968	0.137804	0.0441634	0.00108486	1.76e-05	0.0401429
PASINI_SUZ12_TARGETS_UP	0.0499745	0.084329	1.99e-07	0.0471226	0.0141014	0.220693	0.0477519	0.0650798	1.85e-05	3.38e-10	0.0545034
PASQUALUCCI_LYMPHOMA_BY_GC_STAGE_DN	0.0706925	0.0148917	0.171281	0.0726452	0.059232	0.00074136	0.0694864	-0.0207884	0.11608	0.00109087	0.0177784
PASQUALUCCI_LYMPHOMA_BY_GC_STAGE_UP	0.0989554	0.0269501	8.8e-05	0.0970318	0.0409813	0.00070738	0.0980822	0.0333822	0.00251096	4.35e-08	0.0337712
PATIL_LIVER_CANCER	0.112755	-0.012892	0.353027	0.111485	-0.0205145	0.139877	0.111698	-0.0508513	8.85e-06	5.37e-05	-0.028086
PEART_HDAC_PROLIFERATION_CLUSTER_DN	0.101263	-0.0035787	0.550868	0.10328	-0.0380695	0.0558987	0.101695	-0.0398334	0.212537	0.122221	-0.0271605
PEART_HDAC_PROLIFERATION_CLUSTER_UP	0.0887469	0.0387944	0.049281	0.0916201	0.0728742	0.0154648	0.089749	0.0461272	0.12636	0.00510503	0.0525986
PECE_MAMMARY_STEM_CELL_DN	0.106298	-0.0202455	0.488353	0.108111	0.00120819	0.462724	0.106547	-0.0284101	0.195581	0.397039	-0.0158158
PECE_MAMMARY_STEM_CELL_UP	0.428602	0.00932032	0.0108037	0.431867	0.0174495	8.52e-06	0.422288	0.00452217	0.754167	1.06e-05	0.0104307
PEDERSEN_METASTASIS_BY_ERBB2_ISOFORM_1	0.039417	-0.249834	2.4e-05	0.0445244	-0.267905	3.85e-05	0.048876	0.00590892	0.911226	2.02e-07	-0.17061
PEDERSEN_METASTASIS_BY_ERBB2_ISOFORM_4	0.0796069	0.0920782	2.3e-08	0.0792497	0.0592438	0.0251891	0.0776381	0.118543	1.04e-10	6.19e-17	0.0899549
PEDERSEN_METASTASIS_BY_ERBB2_ISOFORM_6	0.0397493	0.1328	4.43e-23	0.0415634	0.397061	7.03e-35	0.0410767	0.0804219	1.13e-09	4.06e-62	0.203428
PEDERSEN_METASTASIS_BY_ERBB2_ISOFORM_7	0.0580975	0.0233552	0.00121104	0.0590958	0.0424289	0.00335317	0.0592073	0.0384792	0.0115179	7.5e-06	0.0347544
PEDERSEN_TARGETS_OF_611CTF_ISOFORM_OF_ERBB2	0.0422941	-0.0358684	0.0661271	0.0480131	0.0470721	0.466839	0.0432067	-0.0697282	0.00163319	0.00301763	-0.0195082
PEDRIOLI_MIR31_TARGETS_DN	0.0290325	0.00290447	0.695572	0.0305868	0.0353571	0.0211647	0.0313832	0.0514546	0.0198722	0.0123576	0.0299054
PEDRIOLI_MIR31_TARGETS_UP	0.0261223	0.0673041	0.0005501	0.0257221	0.0398615	0.0268979	0.0255307	0.0554095	0.006595	1.44e-05	0.0541917
PELLICCIOTTA_HDAC_IN_ANTIGEN_PRESENTATION_DN	0.282369	-0.0155196	0.333682	0.275364	0.036663	0.035241	0.271669	0.0056236	0.540641	0.119842	0.00892234
PELLICCIOTTA_HDAC_IN_ANTIGEN_PRESENTATION_UP	0.246254	0.0132113	0.0240438	0.237788	0.032511	0.00542598	0.238272	0.0398369	4.82e-05	1.25e-06	0.0285197
PEPPER_CHRONIC_LYMPHOCYTIC_LEUKEMIA_UP	0.0501483	0.043309	0.1145	0.0499777	-0.0240454	0.692043	0.0505552	0.0143029	0.372681	0.316739	0.0111888
PEREZ_TP53_AND_TP63_TARGETS	0.0120875	0.0181974	0.477978	0.0132622	-0.0170957	0.93611	0.0134752	0.133653	0.00382128	0.0473076	0.0449182
PEREZ_TP53_TARGETS	0.0271948	0.0252111	0.0369686	0.0271798	-0.0412867	0.23767	0.0285138	0.0508025	0.00439333	0.00242407	0.0115756
PEREZ_TP63_TARGETS	0.0152221	-0.0336008	0.247811	0.0171714	0.0108761	0.731674	0.0171848	0.0977481	0.133347	0.281677	0.0250078
PETRETTO_CARDIAC_HYPERTROPHY	0.144876	-0.0226462	0.232374	0.15102	-0.017778	0.329879	0.146651	0.0587697	0.0286319	0.0567552	0.00611517
PETRETTO_HEART_MASS_QTL_CIS_DN	0.0376441	-0.150122	1.07e-06	0.0368402	-0.199963	3.55e-05	0.0365269	-0.149634	0.0002552	5.35e-12	-0.166573
PETRETTO_HEART_MASS_QTL_CIS_UP	0.0663365	0.0309114	0.436926	0.0674003	-0.0099119	0.694067	0.0655662	0.0326538	0.684727	0.79059	0.0178844
PETROVA_ENDOTHELIUM_LYMPHATIC_VS_BLOOD_DN	0.0728627	0.031979	0.0474945	0.0753446	0.0790379	0.00161823	0.075766	0.0979655	2.47e-05	4.23e-07	0.0696608
PETROVA_ENDOTHELIUM_LYMPHATIC_VS_BLOOD_UP	0.0427202	0.0270645	0.148255	0.0421094	0.0650531	0.0329532	0.0410254	-0.183759	0.00143568	0.00058418	-0.0305471
PETROVA_PROX1_TARGETS_DN	0.0511782	0.0894617	1.99e-07	0.0530002	0.172683	1.35e-13	0.0505102	0.0958231	4.81e-07	2.37e-23	0.119323
PETROVA_PROX1_TARGETS_UP	0.0771716	-0.0723602	0.759913	0.0746177	0	0.206887	0.0717253	-0.385019	0.0153281	0.0607224	-0.15246
PHONG_TNF_RESPONSE_NOT_VIA_P38	0.0573187	-0.0156375	0.448628	0.0589342	0.024045	0.562319	0.0597396	0.0624552	0.00062739	0.00760385	0.0236209
PHONG_TNF_RESPONSE_VIA_P38_COMPLETE	0.0566636	-0.014473	0.595396	0.0599442	-0.008278	0.980971	0.0608173	-0.0021292	0.813782	0.960314	-0.0082934
PHONG_TNF_RESPONSE_VIA_P38_PARTIAL	0.0585738	-0.0405217	0.148255	0.0625207	-0.0039349	0.955408	0.0617231	0.0471156	0.299457	0.388267	0.00088634
PHONG_TNF_TARGETS_UP	0.13692	-0.0515701	0.0327808	0.139692	-0.0626903	0.226172	0.141139	0.0739134	0.0166111	0.00622194	-0.013449
PICCALUGA_ANGIOIMMUNOBLASTIC_LYMPHOMA_DN	0.0917122	0.00083184	0.722052	0.0966109	0.0135715	0.649774	0.0970132	0.0568788	0.00800594	0.0832998	0.0237607
PICCALUGA_ANGIOIMMUNOBLASTIC_LYMPHOMA_UP	0.0492684	0.110177	3.3e-07	0.0534398	0.156113	2.13e-12	0.0527929	0.137482	3.39e-11	5.34e-26	0.134591
PID_A6B1_A6B4_INTEGRIN_PATHWAY	0.154809	0.0460649	3.33e-08	0.153077	0.0668242	6.07e-06	0.148204	0.0272014	0.103362	1.1e-11	0.0466968
PID_AJDISS_2PATHWAY	0.074156	-0.0402908	0.00024231	0.0758916	-0.0374748	0.273808	0.074893	-0.0559962	0.0106539	8.16e-05	-0.0445873
PID_ALK1_PATHWAY	0.127227	0.020889	0.852811	0.122419	-0.0069352	0.717149	0.118363	0.0292383	0.216005	0.670142	0.0143974
PID_ALPHA_SYNUCLEIN_PATHWAY	0.0790793	0.0674465	0.00245214	0.0786969	0.143488	7.32e-05	0.0756091	0.0686337	0.0481677	1.66e-06	0.0931894
PID_AMB2_NEUTROPHILS_PATHWAY	0.106071	0.0674386	1.48e-05	0.0986121	0.0899257	0.0006556	0.0939314	0.0339052	0.235742	5.01e-07	0.0637565
PID_ANGIOPOIETIN_RECEPTOR_PATHWAY	0.067483	0.0459622	0.0748347	0.0656839	0	0.752451	0.0664844	0.036398	0.126075	0.129121	0.0274534
PID_AP1_PATHWAY	0.129183	0.0123347	0.22163	0.13215	0.0325792	0.248129	0.133051	0.111218	1.39e-06	1.16e-05	0.0520439
PID_AR_NONGENOMIC_PATHWAY	0.155681	0.0635419	1.1e-09	0.150713	0.102388	7.58e-07	0.142895	0.0253	0.0409889	2.58e-14	0.0637434
PID_AR_PATHWAY	0.0905809	0.0152347	0.043892	0.0946365	0.129727	5.38e-08	0.0904662	0.0322112	0.103868	6.57e-08	0.0590575
PID_AR_TF_PATHWAY	0.0723759	-0.0593636	0.00071914	0.0756643	-0.103002	0.00262379	0.0790535	0.0186616	0.53691	0.0001115	-0.0479012
PID_ARF6_PATHWAY	0.00843664	-0.413196	8.54e-06	0.00992166	-0.461989	5.22e-05	0.00955579	-0.321928	0.00012612	2.79e-11	-0.399038
PID_ARF6_TRAFFICKING_PATHWAY	0.0795329	0.00745711	0.398496	0.0841648	0.0401215	0.281575	0.0835877	0.0485119	0.0363648	0.0882796	0.0320302
PID_ATF2_PATHWAY	0.126145	0.0703336	1.02e-05	0.128228	0.118613	1.12e-07	0.126007	0.102338	3.12e-07	3.36e-16	0.0970951
PID_ATM_PATHWAY	0.0484798	-0.0715731	0.0351788	0.0459304	-0.119611	0.00514746	0.0462648	-0.112165	0.00208013	4.72e-05	-0.101117
PID_ATR_PATHWAY	0.0620828	0.0294415	0.202965	0.0601375	-0.028151	0.83506	0.0598017	-0.0949546	0.0104404	0.0485135	-0.0312214
PID_AURORA_A_PATHWAY	0.104422	0.0265448	0.505337	0.0991132	0.0155744	0.555523	0.0973395	-0.041119	0.0896092	0.288377	0.00033341
PID_AURORA_B_PATHWAY	0.18299	-0.0382056	0.671496	0.185958	0.0417774	0.558377	0.170964	-0.183934	3.97e-05	0.00110027	-0.0601208
PID_AVB3_INTEGRIN_PATHWAY	0.0744498	0.0380276	0.00951055	0.0739187	0.0339026	0.329933	0.0753404	0.0819002	0.00929547	0.00192404	0.0512768
PID_AVB3_OPN_PATHWAY	0.200085	0.0116849	0.18037	0.199112	0.0582234	0.0452741	0.19372	0.0445862	0.00691337	0.00330977	0.0381648
PID_BARD1_PATHWAY	0.0705436	-0.0508944	0.00898957	0.0717117	-0.0339227	0.575789	0.0705567	-0.0666018	0.00124078	0.00054221	-0.050473
PID_BCR_5PATHWAY	0.0731777	0.0815638	5.63e-07	0.0699643	0.0851736	0.00082597	0.072494	0.14191	1.07e-06	3.28e-13	0.102882
PID_BETA_CATENIN_NUC_PATHWAY	0.127343	0.0261482	0.0229115	0.128278	0.0392822	0.0111028	0.130618	0.02278	0.190727	0.00292424	0.0294035
PID_BMP_PATHWAY	0.0375995	-0.0270351	0.926261	0.0381377	-0.0785381	0.0751875	0.0373304	0.0575942	0.185775	0.191461	-0.015993
PID_CASPASE_PATHWAY	0.112244	-0.0037233	0.854229	0.11121	-0.0071225	0.811356	0.108726	-0.0125772	0.0886765	0.471993	-0.0078077
PID_CD40_PATHWAY	0.0640988	0.0300339	0.642812	0.0603326	0.057262	0.328629	0.0610174	0.100569	0.00213565	0.0173139	0.0626215
PID_CD8_TCR_DOWNSTREAM_PATHWAY	0.0951103	0.0176958	0.131905	0.0958192	-0.0011966	0.851882	0.0967137	0.0399841	0.0304768	0.0780453	0.0188277
PID_CD8_TCR_PATHWAY	0.0496779	0.0609896	0.00039694	0.046307	0.0257741	0.07091	0.0455912	-0.0086228	0.840884	0.00161837	0.026047
PID_CDC42_PATHWAY	0.136179	0.0250541	0.00222142	0.137129	0.0609889	1.88e-05	0.134951	0.0426065	0.00169988	2.11e-08	0.0428832
PID_CDC42_REG_PATHWAY	0.0884324	0.0140322	0.0135251	0.0878699	0.0452728	8.11e-05	0.0883346	0.0225425	0.227237	3.28e-05	0.0272825
PID_CERAMIDE_PATHWAY	0.0765098	-0.0035821	0.819172	0.0694088	-0.0713459	0.0158816	0.071715	0.025575	0.36567	0.0982331	-0.016451
PID_CMYB_PATHWAY	0.091969	0.00217896	0.736685	0.0906736	-0.0082214	0.765526	0.0914231	-0.024756	0.117841	0.490883	-0.0102661
PID_CXCR3_PATHWAY	0.0853507	0.0906443	2.12e-07	0.0782663	0.0740525	0.00162408	0.077492	0.0259138	0.191884	1.98e-08	0.0635369
PID_CXCR4_PATHWAY	0.0919658	0.0401881	2.69e-08	0.091121	0.054513	1.65e-05	0.0893858	0.0656286	4.87e-08	2.31e-17	0.0534432
PID_DELTA_NP63_PATHWAY	0.0482406	-0.0276649	0.211265	0.0508755	-0.0277244	0.113314	0.0518171	-0.005065	0.907045	0.264117	-0.0201515
PID_E2F_PATHWAY	0.0508039	-0.0431926	0.213209	0.0531341	0.0382484	0.464707	0.0501088	-0.107594	0.00390843	0.0153808	-0.0375129
PID_ECADHERIN_NASCENT_AJ_PATHWAY	0.158147	0.00367739	0.818448	0.158438	0.0698611	0.0031327	0.150096	-0.0026068	0.998185	0.0634108	0.0236439
PID_ECADHERIN_STABILIZATION_PATHWAY	0.0568237	-0.0638426	0.0112994	0.0600896	-0.0443561	0.161959	0.0590126	-0.101658	0.0228289	0.0025868	-0.0699522
PID_ENDOTHELIN_PATHWAY	0.101568	0.0758621	5.76e-11	0.100953	0.135278	3.67e-13	0.0954607	0.0636815	3.63e-05	1.54e-24	0.0916073
PID_EPHA_FWDPATHWAY	0.0345276	0.0698458	0.067191	0.0324228	0.0689692	0.225339	0.032281	0.0288226	0.386041	0.113177	0.0558792
PID_EPHB_FWD_PATHWAY	0.092791	-0.0033172	0.986195	0.0879317	-0.0334854	0.0840866	0.0866589	-0.0312193	0.437296	0.356033	-0.022674
PID_EPHRINB_REV_PATHWAY	0.0221553	-0.0293775	0.0665984	0.0230668	0.0499469	0.593483	0.0212437	-0.0573108	0.149738	0.114145	-0.0122471
PID_EPO_PATHWAY	0.0438521	0.139768	1.29e-07	0.0404242	0.117921	0.0072106	0.0391041	0.0821013	0.0443438	1.28e-08	0.113263
PID_ER_NONGENOMIC_PATHWAY	0.113979	0.0290496	0.0458351	0.104718	-0.0035157	0.620219	0.103011	-0.0186653	0.415057	0.180472	0.00228952
PID_ERA_GENOMIC_PATHWAY	0.11252	0.00359215	0.813921	0.110431	-0.0022088	0.862856	0.112553	0.0127349	0.130135	0.571648	0.00470609
PID_ERBB1_DOWNSTREAM_PATHWAY	0.160657	0.0174403	0.00119038	0.159257	0.0310148	0.00078657	0.15739	0.0447632	0.00045111	1.08e-07	0.0310728
PID_ERBB1_INTERNALIZATION_PATHWAY	0.0780486	0.015484	0.063865	0.0786759	0.0393281	0.376186	0.0775806	0.00995753	0.685665	0.222976	0.0215899
PID_ERBB1_RECEPTOR_PROXIMAL_PATHWAY	0.0637237	-0.0011822	0.938232	0.0615401	-0.0300572	0.430068	0.0632431	-0.0002384	0.800819	0.894366	-0.0104926
PID_ERBB2_ERBB3_PATHWAY	0.11145	0.0673225	2.12e-05	0.107915	0.0621688	0.0098644	0.106369	0.0316824	0.0262189	1.1e-06	0.0537245
PID_ERBB4_PATHWAY	0.0469611	-0.0391351	0.221705	0.0486613	-0.0315562	0.242465	0.0475422	-0.0443743	0.388015	0.257775	-0.0383552
PID_FAK_PATHWAY	0.104911	-0.0086143	0.625144	0.105351	0.0060353	0.557688	0.103309	-0.0137117	0.809294	0.865022	-0.0054302
PID_FANCONI_PATHWAY	0.013369	-0.11265	0.131306	0.0153298	-0.12553	0.0413726	0.0169989	-0.125072	0.0172405	0.00499166	-0.121084
PID_FAS_PATHWAY	0.034463	0.0965859	0.0363642	0.0335545	0.0239742	0.40976	0.0310463	-0.0681151	0.350856	0.104845	0.0174817
PID_FCER1_PATHWAY	0.0675363	0.100898	2.78e-07	0.0672975	0.129283	0.00033161	0.0681081	0.130148	4.79e-06	2.92e-13	0.12011
PID_FGF_PATHWAY	0.0698006	0.0554173	0.00042234	0.0687206	0.0446377	0.0534695	0.0697939	0.0678578	3.18e-05	1.75e-07	0.0559709
PID_FOXM1_PATHWAY	0.0841924	-0.0271551	0.686682	0.0806375	0.0199242	0.898653	0.0747916	-0.247587	5.4e-05	0.00214877	-0.0849392
PID_FOXO_PATHWAY	0.126285	-0.0092728	0.782577	0.127798	0.011075	0.790535	0.120135	-0.0094685	0.955602	0.983595	-0.0025554
PID_FRA_PATHWAY	0.119287	0.0490747	0.00142373	0.123395	0.186851	1.67e-11	0.119821	0.0609567	0.0130207	2.09e-13	0.0989608
PID_GLYPICAN_1PATHWAY	0.0642635	0.294994	9.66e-07	0.0566856	0.0641304	0.210986	0.058966	0.279415	2.68e-06	2.33e-10	0.212846
PID_GMCSF_PATHWAY	0.0830272	0.109769	7.11e-09	0.0765099	0.0142214	0.862669	0.0793538	0.0522813	0.0453465	7.37e-08	0.0587572
PID_HDAC_CLASSI_PATHWAY	0.112724	0.0385824	0.0302162	0.104853	-0.02776	0.775687	0.107081	0.0282671	0.280143	0.122493	0.0130298
PID_HDAC_CLASSII_PATHWAY	0.119062	-0.0009703	0.987025	0.120516	0.016539	0.164117	0.119623	-0.0254528	0.14748	0.279675	-0.0032947
PID_HDAC_CLASSIII_PATHWAY	0.0603917	-0.0922449	3.96e-05	0.0629321	-0.0914035	0.0029212	0.0611313	-0.110975	0.00065474	2.24e-08	-0.0982078
PID_HEDGEHOG_2PATHWAY	0.0231697	0.22414	0.0003894	0.0217552	0.245278	0.0248969	0.0164511	0.194122	0.196026	0.00019184	0.22118
PID_HEDGEHOG_GLI_PATHWAY	0.11161	-0.0335156	0.0299594	0.111935	-0.0059128	0.604534	0.105278	-0.0409016	0.142428	0.0637717	-0.0267767
PID_HES_HEY_PATHWAY	0.0714913	0.0939794	0.00053589	0.0751214	0.107356	0.013352	0.0732649	0.044078	0.260095	0.00018841	0.0818045
PID_HIF1_TFPATHWAY	0.162975	-0.0551867	0.00639518	0.17321	-0.0241002	0.642475	0.164119	-0.0478246	0.00415012	0.00123201	-0.0423705
PID_HIF2PATHWAY	0.160765	0.00079643	0.986195	0.157881	-0.0191334	0.663387	0.149417	-0.0274789	0.212537	0.684001	-0.015272
PID_HIV_NEF_PATHWAY	0.0441856	0.0106144	0.595543	0.0400167	0.0128644	0.661728	0.0425452	0.0704249	0.107773	0.388544	0.0313012
PID_HNF3A_PATHWAY	0.0998579	0.0276952	0.0426354	0.0999695	-0.0084731	0.690436	0.102599	0.049229	0.0155185	0.0174819	0.022817
PID_HNF3B_PATHWAY	0.0298451	-0.0294206	0.517346	0.0271728	-0.218621	0.00192854	0.0250798	-0.108081	0.433806	0.0167671	-0.118707
PID_IFNG_PATHWAY	0.0537823	-0.0257154	0.615555	0.0527603	-0.115055	0.00071543	0.0474405	-0.0978884	0.0940912	0.00256944	-0.0795529
PID_IGF1_PATHWAY	0.121639	0.0651138	1.11e-08	0.119537	0.0525916	0.00724379	0.118512	0.0294267	0.127929	3.57e-09	0.049044
PID_IL1_PATHWAY	0.051513	0.0240075	0.749686	0.0508135	0.0377641	0.816649	0.0535791	0.0655007	0.0607349	0.361059	0.0424241
PID_IL12_2PATHWAY	0.0442234	0.0433953	0.00767144	0.0458073	0.0762689	0.0432657	0.0469524	0.108492	1.97e-06	1.6e-07	0.0760519
PID_IL12_STAT4_PATHWAY	0.0629708	0.0531573	0.00370658	0.0634859	0.0299643	0.233628	0.0656608	0.100506	3.76e-05	5.43e-06	0.0612092
PID_IL2_1PATHWAY	0.0742927	0.0371429	0.0456506	0.0738091	0.0258728	0.228989	0.0741138	0.0349857	0.0708993	0.0253323	0.0326671
PID_IL2_PI3K_PATHWAY	0.102521	0.0362125	0.00360317	0.100163	0.0520393	0.00798745	0.0989377	0.0407994	0.0173812	6.04e-05	0.0430171
PID_IL2_STAT5_PATHWAY	0.0319499	0.0790113	0.024554	0.0338891	0.147201	0.0288944	0.0382878	0.0397512	0.297922	0.00956732	0.0886546
PID_IL23_PATHWAY	0.0282102	0.0302372	0.629282	0.026643	0.0239596	0.457952	0.0273326	0.113548	0.00764205	0.0568958	0.0559149
PID_IL27_PATHWAY	0.0130028	0.104257	0.107046	0.0143059	0.0913966	0.98198	0.016034	0.468702	0.00352064	0.014848	0.221452
PID_IL3_PATHWAY	0.0759587	0.0380351	0.0864201	0.0682301	-0.125947	0.00095318	0.0692625	-0.0079657	0.771545	0.00364529	-0.0319591
PID_IL4_2PATHWAY	0.0225948	-0.037872	0.605628	0.023541	-0.007815	0.852007	0.0211498	-0.0648126	0.513424	0.850546	-0.0368332
PID_IL6_7_PATHWAY	0.138009	0.0316603	0.0110393	0.138136	0.0450617	0.124741	0.135117	0.0524765	0.00037659	6.23e-05	0.0430661
PID_IL8_CXCR1_PATHWAY	0.0659282	0.0730751	4.47e-05	0.0658329	0.12988	3.31e-06	0.0615548	0.0593195	0.0339098	1.83e-09	0.0874249
PID_IL8_CXCR2_PATHWAY	0.0880036	0.110312	2.64e-12	0.0866693	0.181074	2.08e-14	0.0788998	0.0623248	0.00049931	6.09e-26	0.117903
PID_ILK_PATHWAY	0.157727	-0.0317157	0.00071945	0.163769	0.0234065	0.18636	0.157594	-0.029662	0.0595228	0.0006515	-0.0126571
PID_INSULIN_GLUCOSE_PATHWAY	0.171475	0.0364433	0.00414058	0.167611	0.0289804	0.155549	0.159174	-0.0185955	0.376263	0.0106579	0.0156094
PID_INSULIN_PATHWAY	0.0459396	-0.0492293	0.0876166	0.0517753	0.0637866	0.460142	0.0482976	-0.0191288	0.512404	0.256274	-0.0015238
PID_INTEGRIN_A4B1_PATHWAY	0.169383	0.0730925	0.00016257	0.173058	0.0871289	4.72e-05	0.170677	0.081404	0.00038973	1.14e-09	0.0805418
PID_INTEGRIN_A9B1_PATHWAY	0.141209	0.0625144	3.99e-05	0.138761	0.0123205	0.916395	0.139263	0.0532256	0.0053043	2.64e-05	0.0426868
PID_INTEGRIN_CS_PATHWAY	0.0381162	0.0319829	5.98e-09	0.0382719	0.0215169	0.0651789	0.0385836	0.0408237	4.52e-08	1.38e-14	0.0314412
PID_INTEGRIN1_PATHWAY	0.0677859	0.128344	1.23e-06	0.0709168	0.169984	1.35e-06	0.0684514	0.151624	1.42e-08	2.5e-17	0.149984
PID_INTEGRIN2_PATHWAY	0.0151389	0.309519	0.00044843	0.0155697	2.22811	3.98e-12	0.0087695	1.22408	9.13e-05	1.6e-16	1.2539
PID_INTEGRIN3_PATHWAY	0.0907796	0.0059528	0.663719	0.0865077	-0.0964452	0.0720748	0.0874778	0.0157916	0.408937	0.247913	-0.0249003
PID_KIT_PATHWAY	0.0369632	0.221091	2.56e-14	0.034841	0.123488	0.00571839	0.0342265	0.166465	5.32e-05	8.73e-18	0.170348
PID_LIS1_PATHWAY	0.193637	0.0154574	0.0292333	0.188611	0.0244147	0.0204767	0.187649	0.0350744	0.0402379	0.00164206	0.0249822
PID_LKB1_PATHWAY	0.108273	-0.0074293	0.324749	0.107017	-0.0158593	0.215202	0.10376	-0.0502609	0.00469133	0.01351	-0.0245165
PID_LYMPH_ANGIOGENESIS_PATHWAY	0.0793953	0.0688892	0.00686283	0.0756047	-0.0100967	0.881128	0.0786283	0.0667405	0.0633556	0.0152531	0.0418444
PID_LYSOPHOSPHOLIPID_PATHWAY	0.104028	0.0217316	0.0332886	0.100043	0.0560926	0.00691282	0.0978009	0.0363904	0.024993	0.00049382	0.0380715
PID_MAPK_TRK_PATHWAY	0.0964193	-0.0056413	0.754022	0.0926532	-0.0878193	0.0105945	0.0951601	-0.003986	0.859081	0.126206	-0.0324822
PID_MET_PATHWAY	0.0886696	-0.0139582	0.115888	0.0898596	-0.0103429	0.722311	0.0882433	-0.0008423	0.500673	0.385729	-0.0083811
PID_MTOR_4PATHWAY	0.165322	0.00991291	0.240165	0.163771	0.032211	0.0196068	0.155509	-0.0289731	0.0266019	0.00630721	0.00438362
PID_MYC_ACTIV_PATHWAY	0.210063	-0.0095095	0.131852	0.210739	0.0123155	0.248129	0.204666	-0.0537785	4.92e-08	3.64e-07	-0.0169908
PID_MYC_PATHWAY	0.105711	-0.0673848	0.00121104	0.101992	-0.0099861	0.836767	0.0993487	-0.0971592	8.55e-05	1.3e-05	-0.0581767
PID_MYC_REPRESS_PATHWAY	0.0870025	-0.0058347	0.999575	0.0898171	0.0204942	0.231032	0.0914246	0.0278979	0.241438	0.449031	0.0141858
PID_NCADHERIN_PATHWAY	0.116005	0.0034207	0.70428	0.116807	0.0265407	0.837812	0.112148	0.0275035	0.100811	0.464214	0.019155
PID_NECTIN_PATHWAY	0.108762	0.00754876	0.473011	0.111505	0.045695	0.0559106	0.110063	0.0158967	0.685665	0.236641	0.0230468
PID_NEPHRIN_NEPH1_PATHWAY	0.0636831	0.0513188	0.0588188	0.063414	0.0942597	0.00077069	0.0621668	0.0608578	0.0227103	0.00011306	0.0688121
PID_NETRIN_PATHWAY	0.108857	0.0523405	1.56e-05	0.104789	0.0635671	0.00019095	0.1024	0.040204	0.0452843	3.81e-08	0.0520372
PID_NFAT_3PATHWAY	0.109672	0.0257951	0.021086	0.109604	0.0189547	0.4417	0.106642	0.00906679	0.750074	0.12773	0.0179388
PID_NFAT_TFPATHWAY	0.0895069	-0.0169706	0.764833	0.0898006	-0.0341934	0.190623	0.0890085	0.00187658	0.840884	0.649941	-0.0164291
PID_NFKAPPAB_CANONICAL_PATHWAY	0.0824678	0.0594328	0.0185856	0.0772743	0.102627	0.00721432	0.0800881	0.135015	0.00063995	1.28e-05	0.0990247
PID_NOTCH_PATHWAY	0.0707661	-0.0012803	0.761936	0.0746368	0.0683988	0.0825253	0.0733424	0.00842948	0.397694	0.287365	0.0251826
PID_P38_ALPHA_BETA_DOWNSTREAM_PATHWAY	0.0898408	-0.0167116	0.788936	0.0882214	0.0349781	0.618168	0.0895742	-0.0042879	0.851747	0.940632	0.00465953
PID_P38_ALPHA_BETA_PATHWAY	0.0916361	0.0402131	0.0405856	0.0915138	0.0861862	0.00342686	0.0899853	0.0870708	0.00053737	1.14e-05	0.0711567
PID_P38_MKK3_6PATHWAY	0.0739377	-0.0005527	0.910591	0.0739943	0.0284475	0.70966	0.0764873	0.0455968	0.271634	0.746647	0.0244972
PID_P53_DOWNSTREAM_PATHWAY	0.067323	-0.0162206	0.0673779	0.0703372	0.011599	0.615491	0.0692553	0.00780426	0.793605	0.337058	0.00106089
PID_P53_REGULATION_PATHWAY	0.126637	-0.0137007	0.171281	0.127282	0.00799372	0.598122	0.125339	-0.0354732	0.00965064	0.0314957	-0.0137267
PID_P73PATHWAY	0.0650569	-0.0346961	0.00335359	0.0646258	-0.035333	0.110594	0.0657878	0.0010278	0.684121	0.0110505	-0.0230004
PID_P75_NTR_PATHWAY	0.112965	0.0737983	1.95e-16	0.107332	0.0500392	1.61e-06	0.105937	0.072056	2.06e-08	1.5e-26	0.0652978
PID_PDGFRB_PATHWAY	0.136456	0.0387457	3.21e-09	0.133002	0.0380247	7.43e-06	0.132047	0.0340907	0.00073313	1.37e-14	0.0369537
PID_PI3K_PLC_TRK_PATHWAY	0.155501	0.00495231	0.783256	0.150246	-0.0219046	0.77726	0.149253	-0.0177662	0.301247	0.758252	-0.0115728
PID_PI3KCI_AKT_PATHWAY	0.119781	0.0155072	0.141143	0.118113	-0.0049871	0.837812	0.115132	-0.0063237	0.319334	0.364176	0.00139877
PID_PI3KCI_PATHWAY	0.101981	0.0478732	0.00018386	0.0950705	0.0362915	0.122178	0.0899826	0.00305275	0.591686	0.00100039	0.0290725
PID_PLK1_PATHWAY	0.100107	0.0221726	0.622208	0.0965783	0.017336	0.595365	0.0924305	-0.0919339	0.00035761	0.00659642	-0.0174751
PID_PRL_SIGNALING_EVENTS_PATHWAY	0.234878	-0.0019737	0.919889	0.23446	0.0165179	0.500003	0.234042	0.0251957	0.238772	0.620331	0.0132466
PID_PS1_PATHWAY	0.092327	-0.0031616	0.622758	0.0970507	0.0343718	0.134461	0.0970102	0.0192871	0.141383	0.180863	0.0168324
PID_PTP1B_PATHWAY	0.0759435	0.0276679	0.0045033	0.0781151	0.0822262	2.93e-08	0.0743846	0.0428999	0.0105616	5.59e-10	0.0509313
PID_RAC1_PATHWAY	0.158043	0.0122494	0.0141642	0.157989	0.0463369	0.0003897	0.156592	0.0391347	0.00115318	1.26e-06	0.0325737
PID_RAC1_REG_PATHWAY	0.0445196	0.00749463	0.953395	0.0462689	0.0693709	0.083581	0.0459421	0.0121236	0.721684	0.456252	0.029663
PID_RAS_PATHWAY	0.0763023	-0.0878979	1.1e-06	0.0774762	-0.117577	0.00010846	0.0764368	-0.062996	0.0343824	1.52e-09	-0.0894905
PID_RB_1PATHWAY	0.0765866	0.012209	0.688437	0.0782718	0.0600507	0.113552	0.0798614	-0.022494	0.226197	0.232995	0.0165886
PID_REELIN_PATHWAY	0.10796	0.0399171	0.00300942	0.102861	-0.0055519	0.65011	0.100822	0.00853859	0.917147	0.049011	0.0143013
PID_REG_GR_PATHWAY	0.084798	0.00040372	0.631548	0.0847363	-0.009983	0.968189	0.0852725	0.0300953	0.0796246	0.418203	0.00683867
PID_RET_PATHWAY	0.0839933	0.0132462	0.497993	0.0814282	0.0230728	0.51594	0.0805482	0.00033542	0.886103	0.813886	0.0122182
PID_RETINOIC_ACID_PATHWAY	0.0258014	0.0710977	0.454287	0.026637	0.0473971	0.956747	0.027156	0.111112	0.397694	0.742555	0.0765356
PID_RHOA_PATHWAY	0.193524	0.0352643	2.19e-05	0.188121	0.0218806	0.240031	0.192794	0.045695	0.0014092	1.44e-06	0.03428
PID_RHOA_REG_PATHWAY	0.0553557	0.0550976	3.39e-06	0.0550802	0.106099	1.06e-08	0.054983	0.0339877	0.0867435	1.84e-12	0.0650615
PID_RXR_VDR_PATHWAY	0.0245392	0.351628	1.92e-06	0.0222161	0.0282493	0.956747	0.0206622	0.366104	0.00123438	4.96e-07	0.248661
PID_S1P_S1P1_PATHWAY	0.123577	0.0283878	0.13055	0.114703	-0.0097099	0.752715	0.11115	0.00723089	0.952967	0.578028	0.00863627
PID_S1P_S1P2_PATHWAY	0.167559	0.0271446	0.0295846	0.162866	0.0496329	0.0266289	0.160482	0.0456654	0.0297117	0.00160354	0.0408143
PID_S1P_S1P3_PATHWAY	0.107231	0.0397185	0.0177707	0.100015	0.0194888	0.508213	0.0955968	0.0275836	0.60001	0.107461	0.0289303
PID_SHP2_PATHWAY	0.0545113	0.102367	2.38e-07	0.0495627	0.0142139	0.101572	0.0534947	0.0535726	0.0220224	1.33e-07	0.0567178
PID_SMAD2_3NUCLEAR_PATHWAY	0.0977165	-0.0083455	0.824945	0.0953974	-0.0418971	0.0157971	0.0940434	-0.0189216	0.316581	0.0889626	-0.0230547
PID_SYNDECAN_1_PATHWAY	0.0706816	0.0812136	0.002175	0.0729446	0.122745	0.00050802	0.0721051	0.173627	3.57e-06	1.47e-09	0.125862
PID_SYNDECAN_2_PATHWAY	0.154239	0.00773009	0.402048	0.145402	-0.0440708	0.0200115	0.14452	-0.0049056	0.711097	0.111534	-0.0137488
PID_SYNDECAN_4_PATHWAY	0.128855	0.0225721	0.0777336	0.127538	0.0344935	0.286753	0.12431	0.0623014	0.00702373	0.00753826	0.039789
PID_TAP63_PATHWAY	0.0426899	-0.0459641	0.00233248	0.0411408	-0.102763	0.00628468	0.0429481	-0.0793979	0.00923994	1.92e-05	-0.0760416
PID_TCPTP_PATHWAY	0.0502397	-0.0074635	0.92633	0.0519943	-0.0581028	0.163197	0.0529932	0.0002366	0.284432	0.391163	-0.0217766
PID_TCR_CALCIUM_PATHWAY	0.127727	0.023615	0.00196783	0.130614	0.0731463	5.41e-05	0.12917	0.0595534	0.0001168	4.25e-09	0.0521049
PID_TCR_PATHWAY	0.0554822	0.0704647	1.99e-07	0.0497355	-0.0219908	0.361017	0.0509856	0.0364841	0.318239	3.97e-06	0.0283193
PID_TELOMERASE_PATHWAY	0.118719	0.0110249	0.227514	0.113285	-0.0065031	0.913312	0.116906	0.0176429	0.220338	0.404677	0.00738824
PID_TGFBR_PATHWAY	0.112994	-0.0026813	0.883553	0.110219	-0.0207641	0.57218	0.109063	0.0491242	0.0245281	0.186329	0.00855962
PID_THROMBIN_PAR1_PATHWAY	0.0906153	0.0476388	2.71e-05	0.0895381	0.0937291	1.31e-05	0.084576	0.0352984	0.0311936	3.8e-09	0.0588888
PID_TNF_PATHWAY	0.0722978	-0.0075792	0.901275	0.072549	-0.0283985	0.507455	0.0770459	0.0558372	0.00620399	0.0682775	0.00661984
PID_TOLL_ENDOGENOUS_PATHWAY	0.112744	0.00370823	0.724872	0.109207	0.00127539	0.524783	0.108001	-0.0249137	0.196787	0.520398	-0.0066434
PID_TRAIL_PATHWAY	0.0160631	-0.042205	0.218527	0.0174119	-0.143852	0.195196	0.0192103	0.0499689	0.813782	0.34739	-0.0453627
PID_TRKR_PATHWAY	0.0906	0.0512379	1.88e-05	0.0833393	0.00767551	0.522319	0.08515	0.0550009	0.00336788	5.51e-06	0.0379714
PID_TXA2PATHWAY	0.067077	0.0778252	5.88e-09	0.0648501	0.131631	3.02e-10	0.0606729	0.0411784	0.0170127	3.19e-17	0.0835447
PID_UPA_UPAR_PATHWAY	0.0942647	0.0324008	0.0224798	0.0951535	0.034853	0.942318	0.0903741	0.042553	0.0191658	0.0159558	0.0366023
PID_VEGFR1_2_PATHWAY	0.105889	0.0345455	0.00505438	0.106216	0.0238061	0.0617874	0.104075	0.0458638	0.0687418	0.00149242	0.0347385
PID_VEGFR1_PATHWAY	0.0814602	0.0643679	0.00984995	0.0856637	0.05313	0.0831182	0.080413	0.0138261	0.936164	0.0259864	0.0437747
PID_WNT_NONCANONICAL_PATHWAY	0.099574	-0.0012852	0.85755	0.091498	-0.0653162	0.0165123	0.093983	-0.0098432	0.521668	0.132613	-0.0254815
PID_WNT_SIGNALING_PATHWAY	0.0270649	0.0293874	0.719968	0.0205015	-0.355171	4.61e-05	0.0214454	-0.143445	0.0507309	0.0001729	-0.156409
PILON_KLF1_TARGETS_UP	0.0569175	0.0009937	0.621941	0.0586334	-0.0108724	0.74937	0.0593685	-0.0085923	0.630511	0.874097	-0.006157
PIONTEK_PKD1_TARGETS_UP	0.0116288	-0.276623	0.0698306	0.0163365	-0.0839017	0.678588	0.0157618	-0.0211102	0.858305	0.379441	-0.127212
PLASARI_NFIC_TARGETS_BASAL_UP	0	NA	0.0120089	0	NA	0.269349	0	#NAME?	0.183104	0.0213486	NA
PLASARI_TGFB1_SIGNALING_VIA_NFIC_10HR_DN	0	NA	0.190906	0.00035423	Inf	0.683221	0.00171667	Inf	0.142273	0.240026	NA
PLASARI_TGFB1_SIGNALING_VIA_NFIC_10HR_UP	0.0117756	0.3178	2.43e-06	0.0151564	0.529515	2.57e-10	0.0158177	0.349267	7.7e-07	6.04e-19	0.398861
PLASARI_TGFB1_SIGNALING_VIA_NFIC_1HR_DN	0.0722012	0.00336445	0.291561	0.0748385	0.0182406	0.247661	0.0755571	0.016146	0.282681	0.254415	0.0125837
PLASARI_TGFB1_SIGNALING_VIA_NFIC_1HR_UP	0.0259903	0.168285	0.00022438	0.0248315	0.077621	0.301175	0.0272555	0.141264	0.0160025	0.00011797	0.129056
PLASARI_TGFB1_TARGETS_10HR_DN	0.0199005	-0.0266985	0.418426	0.0223173	-0.0039173	0.701848	0.0212204	-0.0163075	0.593763	0.744882	-0.0156411
PLASARI_TGFB1_TARGETS_10HR_UP	0.0493558	-0.0158261	0.647933	0.0492573	-0.0426673	0.314324	0.0497816	0.034943	0.670983	0.679299	-0.0078501
PLASARI_TGFB1_TARGETS_1HR_UP	0.104952	-0.0357942	0.313735	0.102058	-0.122154	0.00101803	0.0985387	-0.0023613	0.533887	0.00806878	-0.0534366
PODAR_RESPONSE_TO_ADAPHOSTIN_UP	0.113244	-0.0187936	0.418207	0.119209	-0.0014479	0.949317	0.120258	0.0647514	0.0119649	0.0981323	0.0148366
POMEROY_MEDULLOBLASTOMA_DESMOPLASIC_VS_CLASSIC_DN	0.269845	0.0487598	4.4e-28	0.278266	0.0907441	4.64e-36	0.276034	0.0386116	2.16e-11	6.35e-70	0.0593718
POMEROY_MEDULLOBLASTOMA_DESMOPLASIC_VS_CLASSIC_UP	0.149855	0.0344097	3.51e-05	0.144207	-0.0053189	0.881472	0.145783	0.00284598	0.513424	0.00116039	0.0106456
POMEROY_MEDULLOBLASTOMA_PROGNOSIS_DN	0.324614	-0.003638	0.952281	0.322748	0.0195538	0.0007355	0.317267	-0.0135419	0.0757531	0.0031462	0.00079131
POMEROY_MEDULLOBLASTOMA_PROGNOSIS_UP	0.052943	0.0223041	0.161226	0.050208	-0.0832821	0.00039693	0.0493461	-0.0004845	0.832364	0.00315635	-0.0204875
POOLA_INVASIVE_BREAST_CANCER_DN	0.0279045	-0.0065057	0.697801	0.0276284	-0.0275011	0.203309	0.029929	0.0401491	0.133938	0.243541	0.00204743
POOLA_INVASIVE_BREAST_CANCER_UP	0.0253801	0.0141467	0.952533	0.0236528	-0.0553325	0.957168	0.0243817	-0.118962	0.126916	0.634363	-0.0533825
POS_HISTAMINE_RESPONSE_NETWORK	0.080359	-0.0321108	0.296052	0.0798782	-0.0016531	0.86849	0.0803246	0.00721406	0.93856	0.828247	-0.00885
PRAMOONJAGO_SOX4_TARGETS_DN	0.189809	0.0541038	0.00021604	0.176451	0.0488446	0.0105549	0.174306	-0.0176446	0.441835	0.00011097	0.0284346
[truncated: 1,818 more rows]

## Sheet: Clone1072_AUCell_by_sample
geneset	median_AUCell.DV1	enrichment.DV1	adj.p.DV1	median_AUCell.DV2	enrichment.DV2	adj.p.DV2	median_AUCell.DV3	enrichment.DV3	adj.p.DV3	fisher.combined.pvalue	mean.enrichment
ABBUD_LIF_SIGNALING_1_DN	0.0715581	-0.045536	0.408361	0.0679178	-0.231091	0.00110884	0.0676771	-0.271664	0.606695	0.0117627	-0.182764
ABBUD_LIF_SIGNALING_1_UP	0.0209149	-0.610519	0.0001448	0.0328142	-0.19821	0.036803	0.0324849	-0.0466682	0.994379	0.000460675	-0.285132
ABE_INNER_EAR	0.278495	-0.0738891	0.0154912	0.298855	0.0525826	0.00427652	0.282864	-0.017999	0.999848	0.00377003	-0.0131018
ABE_VEGFA_TARGETS_2HR	0.031971	0.109469	0.598153	0.035974	0.209815	0.350541	0.0377195	0.153454	0.962854	0.783348	0.157579
ABE_VEGFA_TARGETS_30MIN	0.0931721	0.29327	0.00188781	0.0876796	0.117842	0.124272	0.0938183	0.302657	0.517333	0.00614935	0.237923
ABRAHAM_ALPC_VS_MULTIPLE_MYELOMA_UP	0.0864025	0.148695	0.0167135	0.079506	0.0268749	0.228932	0.0863781	0.10811	0.95962	0.0819784	0.0945597
ABRAMSON_INTERACT_WITH_AIRE	0.193704	0.169415	0.000666075	0.173939	0.0389692	0.987188	0.201424	0.190015	0.886581	0.0210911	0.1328
ACEVEDO_LIVER_CANCER_DN	0.0964293	0.00814582	0.526248	0.0948359	0.00181143	0.482567	0.0957005	0.0241668	0.909247	0.817393	0.0113747
ACEVEDO_LIVER_CANCER_UP	0.132565	0.0247699	0.0318349	0.13139	0.0414562	1.94096e-05	0.129545	0.00480231	0.999848	7.25929e-05	0.0236761
ACEVEDO_LIVER_CANCER_WITH_H3K27ME3_DN	0.0319621	-0.195581	7.236e-05	0.0337999	-0.127235	0.000200569	0.0366854	0.0196863	0.985203	2.60519e-06	-0.101043
ACEVEDO_LIVER_CANCER_WITH_H3K27ME3_UP	0.0513144	-0.0161748	0.641679	0.0545728	0.0966328	0.00024668	0.0529978	0.0012037	0.976387	0.007461	0.0272206
ACEVEDO_LIVER_CANCER_WITH_H3K9ME3_DN	0.033031	-0.0658715	0.332975	0.0335471	-0.142691	0.043302	0.0338338	-0.123084	0.832129	0.182425	-0.110549
ACEVEDO_LIVER_CANCER_WITH_H3K9ME3_UP	0.0172097	-0.114828	0.107588	0.018279	-0.0710761	0.300593	0.0189462	-0.0377785	0.870808	0.308133	-0.074561
ACEVEDO_LIVER_TUMOR_VS_NORMAL_ADJACENT_TISSUE_DN	0.0808062	0.0359461	0.286547	0.0801133	0.0276894	0.20287	0.0801097	0.0395988	0.976387	0.453185	0.0344114
ACEVEDO_LIVER_TUMOR_VS_NORMAL_ADJACENT_TISSUE_UP	0.17758	0.0331634	0.056288	0.170324	0.0248349	0.0308417	0.167455	-0.0147634	0.982172	0.0472117	0.0144116
ACEVEDO_METHYLATED_IN_LIVER_CANCER_DN	0.0395611	0.00183548	0.90651	0.039613	-0.00943348	0.684306	0.0384361	-0.0321123	0.950431	0.983372	-0.0132368
ACEVEDO_NORMAL_TISSUE_ADJACENT_TO_LIVER_TUMOR_DN	0.104007	0.0697593	3.93046e-05	0.0998188	0.0446338	0.0253779	0.0967729	-0.0149519	0.996414	0.000109666	0.0331471
ACEVEDO_NORMAL_TISSUE_ADJACENT_TO_LIVER_TUMOR_UP	0.116199	-0.01329	0.64763	0.118933	0.0290941	0.222961	0.122607	0.0708234	0.783338	0.628247	0.0288759
ACOSTA_PROLIFERATION_INDEPENDENT_MYC_TARGETS_DN	0.0618416	-0.0990885	0.0172287	0.0617584	-0.0558286	0.0201349	0.0584287	-0.104845	0.857212	0.0125167	-0.0865874
ACOSTA_PROLIFERATION_INDEPENDENT_MYC_TARGETS_UP	0.0524959	0.180474	0.000180352	0.0458993	-0.013257	0.937924	0.0505245	0.0130492	0.994374	0.00798152	0.0600888
ADDYA_ERYTHROID_DIFFERENTIATION_BY_HEMIN	0.144879	-0.0151538	0.496358	0.15104	-0.00313625	0.756764	0.142249	-0.034613	0.911823	0.906094	-0.0176343
AFFAR_YY1_TARGETS_DN	0.0755305	0.216125	0.0251776	0.0625859	-0.00614451	0.989041	0.075125	0.116044	0.994379	0.285694	0.108675
AFFAR_YY1_TARGETS_UP	0.0378616	-0.0412608	0.222763	0.0390583	0.00280656	0.659733	0.0397237	0.0548719	0.940494	0.682383	0.00547252
AGUIRRE_PANCREATIC_CANCER_COPY_NUMBER_DN	0.0795721	0.0513925	0.00962136	0.0776586	0.0344284	0.00110418	0.0810125	0.0564198	0.416821	0.000395486	0.0474135
AGUIRRE_PANCREATIC_CANCER_COPY_NUMBER_UP	0.0922951	0.00588766	0.903283	0.0958753	0.0169531	0.856482	0.093435	0.00704807	0.997025	0.997596	0.00996295
AIGNER_ZEB1_TARGETS	0.0318023	-0.0205286	0.198103	0.0257128	-0.312378	1.55253e-06	0.0300552	-0.0606913	0.824469	3.335e-05	-0.131199
AIYAR_COBRA1_TARGETS_DN	0.152007	0.0618442	0.136024	0.140497	0.0235057	0.566955	0.130798	-0.0368733	0.994379	0.526484	0.0161588
AIYAR_COBRA1_TARGETS_UP	0.138667	-0.033841	0.355964	0.139812	0.0579531	0.0392232	0.137072	-0.0182746	0.996414	0.200511	0.00194586
AKL_HTLV1_INFECTION_DN	0.0768582	-0.00363172	0.548445	0.076015	-0.00926941	0.937924	0.0736563	-0.0422282	0.870808	0.952132	-0.0183765
AKL_HTLV1_INFECTION_UP	0.248215	-0.0469118	0.0136627	0.239581	-0.137892	5.96831e-07	0.251	-0.0159208	0.976387	1.54087e-06	-0.0669082
ALCALA_APOPTOSIS	0.201678	0.00333809	0.591542	0.197629	0.0103969	0.569525	0.194137	-0.00426151	0.990749	0.900966	0.00315782
ALCALAY_AML_BY_NPM1_LOCALIZATION_DN	0.0700943	0.159482	0.130935	0.0605338	0.0137592	0.996864	0.0612423	-0.014581	0.997025	0.666074	0.0528867
ALCALAY_AML_BY_NPM1_LOCALIZATION_UP	0.0372805	-0.0390185	0.401403	0.0372394	-0.0805394	0.0683257	0.0409809	0.0679513	0.824469	0.270633	-0.0172022
ALFANO_MYC_TARGETS	0.0983817	-0.0383777	0.286547	0.0999032	0.0149582	0.288288	0.0968118	-0.0241704	0.997025	0.544679	-0.0158633
ALONSO_METASTASIS_EMT_UP	0.130917	0.097187	0.0378817	0.132501	0.0842191	0.0425929	0.130206	0.0639458	0.867353	0.0408155	0.081784
ALONSO_METASTASIS_UP	0.207683	0.012906	0.45774	0.201914	-0.00491031	0.615529	0.196966	-0.00767257	0.994379	0.863429	0.000107713
ALTEMEIER_RESPONSE_TO_LPS_WITH_MECHANICAL_VENTILATION	0.0323407	-0.112854	0.0489485	0.0316388	-0.0604518	0.306804	0.0286167	-0.166499	0.704799	0.16821	-0.113268
AMBROSINI_FLAVOPIRIDOL_TREATMENT_TP53	0.0247471	0.147525	0.0201383	0.0240048	0.0921088	0.066262	0.0234623	-0.0013159	0.994379	0.0392361	0.0794394
AMIT_EGF_RESPONSE_120_HELA	0.0713749	-0.0422917	0.526207	0.0723113	-0.0436502	0.927557	0.076057	0.0927652	0.942883	0.955956	0.00227445
AMIT_EGF_RESPONSE_120_MCF10A	0.100788	0.0407728	0.162609	0.0910614	-0.0382008	0.880394	0.0938419	-0.00918186	0.994379	0.690362	-0.0022033
AMIT_EGF_RESPONSE_240_HELA	0.0940091	0.0202393	0.643102	0.0909327	-0.0440139	0.343914	0.0942809	0.0627904	0.997025	0.80588	0.0130053
AMIT_EGF_RESPONSE_40_HELA	0.177964	0.0644781	0.507371	0.175338	-0.0440634	0.766587	0.173888	0.0624735	0.964113	0.923184	0.0276294
AMIT_EGF_RESPONSE_480_HELA	0.106049	0.0511863	0.226357	0.10167	0.00362722	0.966593	0.0960289	-0.0705269	0.897649	0.776203	-0.00523779
AMIT_EGF_RESPONSE_480_MCF10A	0.0360855	-0.162173	0.179098	0.0399062	-0.081263	0.340994	0.0469757	0.164843	0.892961	0.443901	-0.0261975
AMIT_EGF_RESPONSE_60_HELA	0.126703	0.0623707	0.794577	0.120712	-0.0512612	0.485562	0.117925	-0.0772294	0.994379	0.927254	-0.02204
AMIT_EGF_RESPONSE_60_MCF10A	0.20067	0.058699	0.774874	0.195705	-0.00127219	0.466537	0.190192	0.0007704	0.9518	0.906996	0.0193991
AMIT_SERUM_RESPONSE_120_MCF10A	0.0545389	-0.0134093	0.784041	0.0549151	0.0474476	0.707277	0.0501522	-0.0142467	0.999425	0.977841	0.0065972
AMIT_SERUM_RESPONSE_240_MCF10A	0.0625652	0.0523455	0.265451	0.0612933	-0.0090535	0.749164	0.0612076	0.0026971	0.976387	0.773228	0.0153297
AMIT_SERUM_RESPONSE_40_MCF10A	0.197653	0.172802	0.147208	0.193178	0.065878	0.744682	0.176287	0.0607655	0.985203	0.615854	0.0998152
AMIT_SERUM_RESPONSE_480_MCF10A	0.0663487	0.0355309	0.512505	0.0649792	0.0163819	0.883581	0.0633651	-0.0827714	0.870808	0.93202	-0.0102862
AMIT_SERUM_RESPONSE_60_MCF10A	0.112219	-0.00065772	0.932411	0.109393	-0.108938	0.0574042	0.110442	0.0355114	0.999848	0.439565	-0.0246947
AMUNDSON_RESPONSE_TO_ARSENITE	0.102699	-0.0307759	0.126911	0.104487	-0.0196356	0.929523	0.103298	-0.0523628	0.940494	0.623062	-0.0342581
ANASTASSIOU_MULTICANCER_INVASIVENESS_SIGNATURE	0.0643571	0.00221737	0.908003	0.0680883	0.0373921	0.674996	0.0629239	-0.041051	0.951524	0.982461	-0.000480538
ANDERSEN_CHOLANGIOCARCINOMA_CLASS1	0.0388776	-0.0294492	0.733117	0.0392638	0.0382642	0.935465	0.0407289	-0.0512316	0.920374	0.988455	-0.0141389
ANDERSEN_CHOLANGIOCARCINOMA_CLASS2	0.0375837	0.0483724	0.563235	0.037088	0.024411	0.562698	0.0382113	0.0535443	0.994379	0.889158	0.0421092
ANDERSEN_LIVER_CANCER_KRT19_DN	0.025684	-0.310361	8.03663e-05	0.0268007	-0.275555	0.000134278	0.0262423	-0.163298	0.976387	1.98159e-06	-0.249738
ANDERSEN_LIVER_CANCER_KRT19_UP	0.399757	0.0467118	0.000654207	0.385919	0.0156554	0.0772766	0.387147	0.0147952	0.915311	0.00281299	0.0257208
APPEL_IMATINIB_RESPONSE	0.0467273	-0.0581866	0.759589	0.0521875	0.0310268	0.64173	0.0442089	-0.168347	0.864328	0.942881	-0.0651689
APPIERTO_RESPONSE_TO_FENRETINIDE_DN	0.211606	-0.00955487	0.751437	0.210199	0.00636671	0.999448	0.200854	-0.0481553	0.976387	0.99605	-0.0171145
APPIERTO_RESPONSE_TO_FENRETINIDE_UP	0.157681	0.113002	0.00018593	0.15032	0.0976574	7.64738e-05	0.14304	-0.0507111	0.713059	1.91435e-06	0.0533162
APRELIKOVA_BRCA1_TARGETS	0.284214	0.0124151	0.373453	0.285595	0.0552676	0.00143613	0.29349	0.047199	0.924315	0.0186205	0.0382939
ASGHARZADEH_NEUROBLASTOMA_POOR_SURVIVAL_DN	0.0413013	-0.349807	0.000217422	0.0442661	-0.332707	0.000656984	0.0424231	-0.31553	0.374548	8.44879e-06	-0.332681
ASTIER_INTEGRIN_SIGNALING	0.0984637	0.0640067	0.168064	0.0946338	0.0254962	0.885344	0.0936477	0.0121598	0.996414	0.701348	0.0338876
ASTON_MAJOR_DEPRESSIVE_DISORDER_DN	0.0401119	-0.0216718	0.811645	0.0389925	-0.0495778	0.790395	0.0421337	0.00502018	0.9518	0.986114	-0.0220765
ASTON_MAJOR_DEPRESSIVE_DISORDER_UP	0.0766465	0.0553244	0.208796	0.0744215	-0.00757143	0.78061	0.0819687	0.0660255	0.811912	0.670603	0.0379262
AUNG_GASTRIC_CANCER	0.171622	0.117243	2.79497e-05	0.1585	0.0527817	0.00502869	0.156438	-0.0248624	0.994374	1.97537e-05	0.0483873
AZARE_NEOPLASTIC_TRANSFORMATION_BY_STAT3_UP	0.0773976	-0.110637	0.00794447	0.0805162	-0.0751289	0.128376	0.0835728	-0.0159816	0.997025	0.0321672	-0.0672492
AZARE_STAT3_TARGETS	0.102434	-0.150095	0.0431297	0.106249	-0.130917	0.100567	0.129789	0.124598	0.997025	0.0919355	-0.0521378
BACOLOD_RESISTANCE_TO_ALKYLATING_AGENTS_DN	0.103519	0.0137609	0.542456	0.0959819	-0.0744059	0.117677	0.103661	0.042534	0.856303	0.444439	-0.006037
BAE_BRCA1_TARGETS_DN	0.117677	-0.0110709	0.879916	0.11636	-0.0050836	0.738536	0.12238	0.0392685	0.937649	0.985959	0.00770465
BAE_BRCA1_TARGETS_UP	0.181542	-0.0482291	0.133054	0.179673	-0.0315027	0.12746	0.186254	0.052754	0.62462	0.168298	-0.00899261
BAELDE_DIABETIC_NEPHROPATHY_DN	0.112378	-0.0721023	0.0124565	0.117227	-0.0230569	0.366189	0.116876	-0.021793	0.997025	0.0952135	-0.0389841
BAELDE_DIABETIC_NEPHROPATHY_UP	0.0724909	-0.0142728	0.806007	0.0736888	0.0217096	0.50876	0.0695009	-0.0696575	0.579584	0.824515	-0.0207402
BAKKER_FOXO3_TARGETS_DN	0.0797713	-0.000269809	0.308202	0.0814591	0.0606447	0.000276349	0.0825354	0.0425053	0.783338	0.00379222	0.0342934
BAKKER_FOXO3_TARGETS_UP	0.0387812	-0.120482	0.30891	0.0426145	-0.160377	0.0425929	0.0490266	0.032534	0.997025	0.193159	-0.0827751
BALDWIN_PRKCI_TARGETS_UP	0.0876905	-0.108416	0.000788917	0.0876266	-0.118905	1.74175e-05	0.0980929	0.0902671	0.563434	1.50262e-06	-0.0456847
BANDRES_RESPONSE_TO_CARMUSTIN_MGMT_24HR_DN	0.11174	0.0515649	0.209265	0.104041	-0.0351554	0.382601	0.113038	0.0662533	0.940494	0.521883	0.0275543
BANDRES_RESPONSE_TO_CARMUSTIN_MGMT_48HR_DN	0.0970727	-0.00839308	0.638092	0.0960353	0.00467802	0.80672	0.0932127	-0.0156368	0.946072	0.963445	-0.00645062
BANDRES_RESPONSE_TO_CARMUSTIN_WITHOUT_MGMT_48HR_DN	0.122428	0.0476588	0.253096	0.114772	0.00549165	0.83646	0.117251	0.00167805	0.997025	0.794781	0.0182762
BARIS_THYROID_CANCER_DN	0.137685	0.11921	0.000128847	0.128294	0.0375863	0.545181	0.133338	0.0527755	0.579584	0.00253252	0.0698571
BARIS_THYROID_CANCER_UP	0.206549	0.0356705	0.426557	0.197065	-0.0223931	0.54802	0.1859	-0.0877051	0.657193	0.710942	-0.0248093
BARRIER_CANCER_RELAPSE_NORMAL_SAMPLE_DN	0.0590902	0.0106597	0.908003	0.0626846	-0.0271427	0.584424	0.0676526	0.0834103	0.9518	0.96789	0.0223091
BARRIER_CANCER_RELAPSE_NORMAL_SAMPLE_UP	0.0284347	-0.0775291	0.0654982	0.0306882	0.00835669	0.822853	0.0287132	-0.0634666	0.994379	0.439892	-0.044213
BARRIER_COLON_CANCER_RECURRENCE_UP	0.139831	0.0240847	0.218546	0.138248	0.0719059	0.00727355	0.125515	-0.0639166	0.911575	0.0418803	0.0106913
BASAKI_YBX1_TARGETS_DN	0.0719244	-0.0646479	0.0668141	0.0763908	-0.0327221	0.243903	0.0800779	0.0861935	0.814366	0.19459	-0.0037255
BASAKI_YBX1_TARGETS_UP	0.0965979	0.151873	0.168064	0.0834719	-0.00308045	0.656912	0.0882021	-0.00695867	0.997025	0.620945	0.047278
BASSO_B_LYMPHOCYTE_NETWORK	0.217276	0.0365607	0.0331829	0.208015	0.0426131	0.547818	0.203888	-0.00983941	0.997025	0.236567	0.0231115
BASSO_CD40_SIGNALING_DN	0.0329062	-0.0151437	0.497513	0.0325301	-0.0620419	0.663376	0.0340174	-0.0243378	0.999848	0.898658	-0.0338411
BASSO_CD40_SIGNALING_UP	0.0659665	-0.116565	0.000682027	0.0680797	-0.0723454	0.0566767	0.0702323	-0.0108116	0.994374	0.00241561	-0.0665739
BASSO_HAIRY_CELL_LEUKEMIA_UP	0.109572	-0.0905712	0.0091215	0.116062	-0.0241602	0.621252	0.107797	-0.0709454	0.976387	0.109008	-0.0618923
BAUS_TFF2_TARGETS_UP	0.0574223	-0.23689	0.00384167	0.0730374	-0.0156149	0.52188	0.0786011	0.104224	0.976387	0.0522279	-0.049427
BECKER_TAMOXIFEN_RESISTANCE_DN	0.108929	0.131357	0.000629294	0.102965	0.068823	0.0513627	0.102398	0.00297021	0.999418	0.00209331	0.0677169
BECKER_TAMOXIFEN_RESISTANCE_UP	0.0882595	-0.110984	0.0462607	0.094751	-0.0404058	0.129439	0.107664	0.101377	0.911823	0.10802	-0.0166709
BEGUM_TARGETS_OF_PAX3_FOXO1_FUSION_DN	0.0213496	-0.296617	0.34532	0.0240183	-0.192645	0.367761	0.0321073	0.241889	0.976387	0.653007	-0.0824579
BEGUM_TARGETS_OF_PAX3_FOXO1_FUSION_UP	0.0596213	-0.00827553	0.868331	0.0650518	0.0323711	0.542721	0.060936	-0.00607728	0.999848	0.959162	0.00600609
BEIER_GLIOMA_STEM_CELL_DN	0.057847	-0.0149665	0.495184	0.0580292	0.0111344	0.792793	0.0520535	-0.133318	0.348817	0.679863	-0.0457166
BEIER_GLIOMA_STEM_CELL_UP	0.0149462	-0.0338406	0.770536	0.0163415	0.163415	0.727364	0.0157503	-0.104437	0.9518	0.973987	0.00837921
BENITEZ_GBM_PROTEASOME_INHIBITION_RESPONSE	0.087056	0.0469028	0.555171	0.0777155	-0.12589	0.0455415	0.0806246	-0.078221	0.915311	0.274416	-0.0524027
BENNETT_SYSTEMIC_LUPUS_ERYTHEMATOSUS	0.0249261	0.099145	0.988342	0.0218044	-0.175131	0.948304	0.024122	-0.0997242	0.997025	0.999951	-0.0585702
BENPORATH_CYCLING_GENES	0.103048	0.159606	0.0285548	0.0901999	0.000207403	0.921872	0.0980561	0.0403336	0.997025	0.295682	0.0667156
BENPORATH_EED_TARGETS	0.0314661	0.0756687	0.013296	0.0321923	0.0865694	0.00961531	0.0319045	0.0570052	0.928848	0.00604261	0.0730811
BENPORATH_ES_1	0.0960237	0.146468	0.000679955	0.0869974	0.0275152	0.350787	0.0941223	0.0509856	0.994379	0.0104786	0.0749895
BENPORATH_ES_2	0.0135618	-0.235354	0.511688	0.0133215	-0.20728	0.38659	0.014523	-0.0807314	0.994379	0.7766	-0.174455
BENPORATH_ES_CORE_NINE_CORRELATED	0.0856548	0.0542355	0.260088	0.0819717	-0.0459539	0.54802	0.0868252	-0.0353486	0.996414	0.689729	-0.00902236
BENPORATH_ES_WITH_H3K27ME3	0.0153263	-0.0223629	0.345724	0.016498	-0.0283356	0.749984	0.0163971	0.0334701	0.997025	0.844786	-0.00574278
BENPORATH_MYC_MAX_TARGETS	0.197434	0.0597544	2.91121e-09	0.190835	0.0427701	2.56817e-05	0.183174	-0.0209542	0.92969	3.40772e-11	0.0271901
BENPORATH_MYC_TARGETS_WITH_EBOX	0.202246	-0.00330863	0.75048	0.197695	-0.00702175	0.310817	0.200781	0.0107266	0.950431	0.80723	0.000132082
BENPORATH_NANOG_TARGETS	0.115917	0.0186533	0.205551	0.114852	0.00739305	0.281341	0.113744	-0.0106668	0.980114	0.452859	0.00512651
BENPORATH_NOS_TARGETS	0.0611426	-0.000568306	0.980613	0.063858	0.00507148	0.841934	0.0639086	0.00315829	0.976387	0.998579	0.00255382
BENPORATH_OCT4_TARGETS	0.0740338	0.0270716	0.310218	0.074547	0.0156894	0.462431	0.0750032	0.0079059	0.976387	0.685977	0.0168889
BENPORATH_PRC2_TARGETS	0.0107437	0.0640911	0.380231	0.0120206	0.124159	0.121086	0.0115879	0.065977	0.973827	0.400135	0.0847425
BENPORATH_PROLIFERATION	0.17535	0.187015	0.132477	0.152002	0.0586223	0.693928	0.148226	-0.0658393	0.973827	0.56625	0.0599327
BENPORATH_SOX2_TARGETS	0.114406	0.0289607	0.069454	0.111536	-0.0139702	0.370871	0.113782	0.0127218	0.97336	0.287811	0.00923744
BENPORATH_SUZ12_TARGETS	0.0193559	-0.00518279	0.314526	0.0200839	-0.0464322	0.593919	0.0204802	0.0307495	0.997025	0.762314	-0.00695515
BERENJENO_ROCK_SIGNALING_NOT_VIA_RHOA_DN	0.205864	0.0620942	0.0798244	0.200211	0.0314255	0.465782	0.189605	-0.0423825	0.976194	0.356212	0.0170458
BERENJENO_ROCK_SIGNALING_NOT_VIA_RHOA_UP	0.0634622	-0.0871348	0.0403113	0.0655195	-0.176808	0.00670289	0.0577945	-0.183091	0.721244	0.0089715	-0.149011
BERENJENO_TRANSFORMED_BY_RHOA_DN	0.0855566	-0.103752	0.01865	0.0919849	-0.0137147	0.766587	0.0872798	-0.0101724	0.994379	0.20328	-0.0425465
BERENJENO_TRANSFORMED_BY_RHOA_FOREVER_DN	0.160015	0.13779	0.00233244	0.146784	0.106989	0.0186192	0.145439	-0.0304849	0.993461	0.00265604	0.0714315
BERENJENO_TRANSFORMED_BY_RHOA_REVERSIBLY_DN	0.0251726	-0.518779	0.000639632	0.0264719	-0.599433	8.5653e-06	0.0365646	-0.0337787	0.927005	1.02828e-06	-0.383997
BERENJENO_TRANSFORMED_BY_RHOA_UP	0.189396	0.157724	0.00071355	0.164788	0.0342513	0.261443	0.17567	0.0476782	0.980114	0.00852892	0.0798845
BERNARD_PPAPDC1B_TARGETS_DN	0.0227738	-0.149165	0.0160097	0.0240717	-0.225509	0.00672148	0.0247558	-0.134384	0.976776	0.00547811	-0.169686
BERNARD_PPAPDC1B_TARGETS_UP	0.0970251	0.0379356	0.454285	0.0943852	-0.0425117	0.151728	0.0944461	0.0118358	0.997025	0.499109	0.00241988
BERTUCCI_INVASIVE_CARCINOMA_DUCTAL_VS_LOBULAR_DN	0.0312802	-0.276439	3.04602e-06	0.0364632	-0.164298	0.000306103	0.0354594	-0.0899503	0.87782	1.97107e-07	-0.176896
BERTUCCI_INVASIVE_CARCINOMA_DUCTAL_VS_LOBULAR_UP	0.108403	0.0982822	0.0678664	0.0950252	0.0102892	0.555747	0.0897193	-0.0945629	0.86924	0.33632	0.0046695
BERTUCCI_MEDULLARY_VS_DUCTAL_BREAST_CANCER_DN	0.039985	-0.215481	0.00515814	0.0402492	-0.252702	0.000246275	0.0482209	0.0782873	0.984031	0.000133714	-0.129965
BERTUCCI_MEDULLARY_VS_DUCTAL_BREAST_CANCER_UP	0.0691908	0.0456455	0.173569	0.0667904	0.0422043	0.276001	0.0626085	-0.0927997	0.859826	0.382088	-0.00164997
BHAT_ESR1_TARGETS_NOT_VIA_AKT1_DN	0.0207218	-0.0867685	0.573344	0.0257261	-0.00249896	0.812109	0.0274745	-0.0116632	0.976387	0.954247	-0.0336435
BHAT_ESR1_TARGETS_NOT_VIA_AKT1_UP	0.0362406	0.0813487	0.104828	0.0341017	-0.0112875	0.844274	0.0367163	0.017702	0.994379	0.561799	0.0292544
BHAT_ESR1_TARGETS_VIA_AKT1_DN	0.0199567	-0.00416365	0.535406	0.0236049	0.0609021	0.968368	0.0223696	-0.167788	0.783338	0.936968	-0.0370165
BHAT_ESR1_TARGETS_VIA_AKT1_UP	0.0590647	0.110989	0.00444185	0.0554395	0.0250377	0.181726	0.0565743	-0.0049969	0.997025	0.0269665	0.0436767
BHATI_G2M_ARREST_BY_2METHOXYESTRADIOL_DN	0.120527	-0.0479292	0.0247793	0.122725	0.00806919	0.752582	0.124951	-0.0222905	0.987981	0.238971	-0.0207169
BHATI_G2M_ARREST_BY_2METHOXYESTRADIOL_UP	0.126236	0.0612176	0.0926428	0.123108	0.0542583	0.367108	0.112488	-0.0631696	0.460713	0.216114	0.0174355
BHATTACHARYA_EMBRYONIC_STEM_CELL	0.289294	0.0851752	0.00156373	0.276288	0.0464383	0.103841	0.281695	0.035415	0.994379	0.00772588	0.0556762
BIDUS_METASTASIS_DN	0.0260168	-0.112759	0.0193401	0.0313431	0.0953371	0.336605	0.0276667	-0.0696051	0.920374	0.115106	-0.0290089
BIDUS_METASTASIS_UP	0.12581	0.115347	0.0290353	0.117091	0.0430174	0.861655	0.122461	0.0258775	0.994374	0.286487	0.0614139
BILANGES_RAPAMYCIN_SENSITIVE_GENES	0.188707	-0.00407065	0.299497	0.188786	-0.0260249	0.0676356	0.18774	0.000152162	0.999848	0.253214	-0.00998112
BILANGES_RAPAMYCIN_SENSITIVE_VIA_TSC1_AND_TSC2	0.380002	-0.0129635	0.645365	0.366805	-0.0230695	0.168048	0.365128	-0.024867	0.86924	0.579777	-0.0203
BILANGES_SERUM_AND_RAPAMYCIN_SENSITIVE_GENES	0.671318	-0.0114877	0.058551	0.666408	-0.0153658	0.0216159	0.662797	-0.002939	0.996414	0.0377808	-0.00993083
BILANGES_SERUM_RESPONSE_TRANSLATION	0.516016	-0.0142956	0.302344	0.512647	-0.0278295	0.0272765	0.511247	-0.00312246	0.967275	0.139609	-0.0150825
BILANGES_SERUM_SENSITIVE_GENES	0.127647	-0.0213772	0.833735	0.128763	0.00348089	0.863444	0.126744	-0.0316284	0.949361	0.993072	-0.0165082
BILANGES_SERUM_SENSITIVE_VIA_TSC2	0.185327	0.121073	0.0186975	0.182746	0.118134	0.0340922	0.176914	0.0279912	0.911823	0.021043	0.089066
BILBAN_B_CLL_LPL_DN	0.171154	0.0176969	0.517849	0.166124	-0.00345837	0.891379	0.161382	-0.0170354	0.99757	0.956036	-0.000932262
BILBAN_B_CLL_LPL_UP	0.0440301	-0.00586205	0.868121	0.0421059	-0.151471	0.0454143	0.0472332	0.0787734	0.976387	0.368084	-0.0261864
BILD_CTNNB1_ONCOGENIC_SIGNATURE	0.0774496	-0.0446346	0.89723	0.0821546	-0.0351809	0.49698	0.0946268	0.175695	0.864328	0.928059	0.03196
BILD_E2F3_ONCOGENIC_SIGNATURE	0.0398669	0.132485	0.00762339	0.0380396	0.109568	0.00778552	0.0375587	-0.00123057	0.997025	0.00343928	0.080274
BILD_HRAS_ONCOGENIC_SIGNATURE	0.0957953	0.0358562	0.584998	0.0907908	-0.0566962	0.52188	0.0929862	0.0173276	0.976387	0.877232	-0.00117079
BILD_MYC_ONCOGENIC_SIGNATURE	0.0744734	0.0968062	0.00408164	0.0686246	-0.00207831	0.803627	0.0676979	-0.062311	0.940494	0.0724728	0.0108056
BILD_SRC_ONCOGENIC_SIGNATURE	0.0301104	0.0962601	0.747633	0.0301576	-0.028449	0.980099	0.0323778	0.0733994	0.864328	0.98868	0.0470702
BIOCARTA_AGR_PATHWAY	0.107351	0.0446828	0.343596	0.105795	0.0318827	0.440219	0.104764	0.0325215	0.997025	0.705947	0.0363623
BIOCARTA_ALK_PATHWAY	0.0151284	-0.217127	0.112136	0.0173926	-0.263315	0.0235816	0.0227231	0.279371	0.864328	0.0584452	-0.0670235
BIOCARTA_AT1R_PATHWAY	0.148941	0.0595429	0.347982	0.149827	0.115631	0.00641777	0.148451	0.0647202	0.973827	0.0563805	0.0799646
BIOCARTA_ATRBRCA_PATHWAY	0	NA	0.445906	0.00111134	-0.313157	0.440219	0	#NAME?	0.933786	0.75811	NA
BIOCARTA_BAD_PATHWAY	0.0922182	-0.0699996	0.0366429	0.0825718	-0.184693	0.0218374	0.0896028	-0.0333019	0.976387	0.0263674	-0.0959983
BIOCARTA_BCR_PATHWAY	0.134922	0.0138752	0.11318	0.136697	0.060655	0.0138961	0.136299	0.0324839	0.997025	0.0443925	0.0356714
BIOCARTA_BIOPEPTIDES_PATHWAY	0.0898618	-0.0503317	0.600992	0.0955208	0.0824283	0.0633294	0.100851	0.129521	0.645204	0.284289	0.0538726
BIOCARTA_CARM_ER_PATHWAY	0.0707965	0.129471	0.00121384	0.063997	0.0265091	0.787026	0.0665192	0.0501234	0.976387	0.0301461	0.0687012
BIOCARTA_CERAMIDE_PATHWAY	0.0402775	-0.204358	0.0382047	0.0407153	-0.214701	0.00679079	0.047417	0.0898342	0.983315	0.0110978	-0.109742
BIOCARTA_CREB_PATHWAY	0.0855392	-0.16157	0.0582697	0.090035	0.00459417	0.849409	0.0804876	-0.192947	0.861193	0.389305	-0.116641
BIOCARTA_CTCF_PATHWAY	0.0494581	-0.0287899	0.0767591	0.0432035	-0.240306	0.0127945	0.04412	-0.0597347	0.911575	0.0292277	-0.10961
BIOCARTA_DEATH_PATHWAY	0.066042	-0.110883	0.0596057	0.0602935	-0.222482	4.61591e-05	0.0641258	-0.109149	0.783338	0.00021373	-0.147505
BIOCARTA_EDG1_PATHWAY	0.0779619	-0.171932	0.00130276	0.0759581	-0.119334	0.0100168	0.0725062	-0.102793	0.915848	0.000915134	-0.131353
BIOCARTA_EGF_PATHWAY	0.0867599	0.0601403	0.48098	0.0900297	0.0656594	0.3904	0.0950707	0.0957306	0.824213	0.712933	0.0738434
BIOCARTA_EIF4_PATHWAY	0.161881	0.0339276	0.311951	0.162057	0.0756664	0.0370879	0.170081	0.128286	0.864328	0.162089	0.0792932
BIOCARTA_ERK_PATHWAY	0.112346	-0.0951198	0.0241296	0.119554	0.0267162	0.437098	0.119731	0.0281825	0.976194	0.165208	-0.013407
BIOCARTA_FAS_PATHWAY	0.0973588	0.0344737	0.483348	0.0990584	0.0101869	0.883581	0.0977745	-0.0366977	0.86924	0.92136	0.00265432
BIOCARTA_FCER1_PATHWAY	0.115599	0.0640242	0.0209901	0.119034	0.111907	0.00394074	0.117078	0.0400027	0.994379	0.00449419	0.071978
BIOCARTA_FMLP_PATHWAY	0.120155	-0.0337266	0.640054	0.121231	0.0590071	0.246986	0.117564	-0.0191051	0.999848	0.718602	0.00205849
BIOCARTA_G1_PATHWAY	0.0698525	0.0208646	0.819548	0.0657817	0.000647126	0.564165	0.0657522	0.00194295	0.999848	0.956578	0.00781822
BIOCARTA_G2_PATHWAY	0.0702791	-0.00252439	0.371552	0.0693867	-0.00510912	0.863444	0.0758485	0.0591376	0.976387	0.887877	0.017168
BIOCARTA_GH_PATHWAY	0.0217445	-0.0774313	0.458454	0.0250279	0.156635	0.254994	0.0253413	0.112894	0.870808	0.600089	0.0640327
BIOCARTA_GLEEVEC_PATHWAY	0.0977569	-0.0455907	0.947677	0.101695	0.0335624	0.653634	0.102742	0.0336593	0.928848	0.981294	0.00721031
BIOCARTA_GPCR_PATHWAY	0.167089	0.0566276	0.104828	0.164341	0.0602555	0.109229	0.160354	-0.0120228	0.985203	0.175311	0.0349534
BIOCARTA_HDAC_PATHWAY	0.118938	-0.0251824	0.497986	0.120782	0.0257741	0.38438	0.123274	0.0617153	0.9518	0.756508	0.020769
BIOCARTA_HER2_PATHWAY	0.0207113	-0.335471	0.0958327	0.0273287	0.0497373	0.989108	0.0278844	0.00523662	0.997025	0.580435	-0.093499
BIOCARTA_HIVNEF_PATHWAY	0.0776311	-0.106808	0.00194054	0.077314	-0.130998	0.000130859	0.0737846	-0.181286	0.0489833	2.29951e-06	-0.139697
BIOCARTA_IGF1R_PATHWAY	0.0887224	-0.157379	0.0323319	0.0899122	-0.0744133	0.289508	0.0849921	-0.183267	0.914677	0.146332	-0.138353
BIOCARTA_IL1R_PATHWAY	0.0614875	-0.0383281	0.900562	0.0553742	-0.0834888	0.312618	0.0595246	0.0126652	0.997025	0.863854	-0.0363839
BIOCARTA_IL2_PATHWAY	0.0993804	0.0241565	0.237023	0.107025	0.138547	0.0401576	0.110797	0.124016	0.864328	0.142506	0.0955735
BIOCARTA_IL2RB_PATHWAY	0.081388	-0.00837764	0.369158	0.085881	0.0750748	0.315518	0.0815658	0.0133357	0.920374	0.613867	0.0266776
BIOCARTA_INFLAM_PATHWAY	0.0158281	-0.635236	0.00296907	0.012292	-1.09187	0.000491509	0.0158618	-0.317633	0.976387	0.000149706	-0.681581
BIOCARTA_INTEGRIN_PATHWAY	0.140195	-0.0886869	0.0568839	0.147103	0.0148513	0.474926	0.151494	0.0494113	0.994374	0.299752	-0.00814145
BIOCARTA_KERATINOCYTE_PATHWAY	0.0801712	0.0410821	0.773161	0.0731574	-0.0215622	0.989041	0.0745443	-0.0231275	0.997025	0.997282	-0.00120253
BIOCARTA_MAPK_PATHWAY	0.0586109	-0.120474	0.204017	0.0601298	-0.0389111	0.395386	0.0613314	-0.0135044	0.994379	0.537906	-0.0576298
BIOCARTA_MET_PATHWAY	0.125344	-0.0142955	0.606633	0.127034	0.025771	0.788127	0.12444	0.0112722	0.976387	0.957908	0.00758255
BIOCARTA_NFAT_PATHWAY	0.111444	0.00905654	0.938168	0.111079	0.0194824	0.686573	0.105247	-0.0796712	0.9518	0.986413	-0.0170441
BIOCARTA_NFKB_PATHWAY	0.0316225	-0.375317	0.0733623	0.0271267	-0.467793	0.00295013	0.0288274	-0.327311	0.886039	0.0088575	-0.39014
BIOCARTA_NKT_PATHWAY	0	NA	0.00653812	0	NA	0.00646229	0	NA	0.870808	0.00233024	NA
BIOCARTA_NO1_PATHWAY	0.120736	-0.0984526	0.013122	0.124164	-0.0222114	0.696136	0.124334	-0.00197006	0.997025	0.152435	-0.040878
BIOCARTA_NTHI_PATHWAY	0.0595556	-0.12098	0.833172	0.0554073	-0.146382	0.271435	0.0625141	0.0699442	0.994379	0.810806	-0.0658059
BIOCARTA_NUCLEARRS_PATHWAY	0	NA	0.208616	0	NA	0.264503	0	NA	0.976194	0.441061	NA
BIOCARTA_P38MAPK_PATHWAY	0.0855292	-0.0738596	0.139964	0.0872427	0.012494	0.816952	0.0813081	-0.0877463	0.892961	0.600883	-0.049704
BIOCARTA_PDGF_PATHWAY	0.0880647	-0.0226126	0.695149	0.091792	-0.00411967	0.579858	0.0973042	0.0559454	0.9518	0.927259	0.00973773
BIOCARTA_PPARA_PATHWAY	0.0923033	0.0144878	0.865758	0.0806111	-0.16367	0.00395625	0.0897596	0.0292244	0.994379	0.0777438	-0.0399859
BIOCARTA_PTDINS_PATHWAY	0.107888	-0.0381916	0.238655	0.107342	0.0156436	0.596123	0.113934	0.148253	0.793975	0.62788	0.0419016
BIOCARTA_PYK2_PATHWAY	0.159786	0.0872173	0.0649376	0.158383	0.12178	9.33985e-05	0.160713	0.102369	0.93168	0.000486481	0.103789
BIOCARTA_RACCYCD_PATHWAY	0.147111	-0.0555891	0.191629	0.128329	-0.0886238	0.232778	0.13796	-0.0141498	0.976194	0.393857	-0.0527876
BIOCARTA_RAS_PATHWAY	0.152233	-0.0508996	0.410929	0.141332	-0.0385434	0.511168	0.141975	0.00359864	0.987981	0.790445	-0.0286148
BIOCARTA_RHO_PATHWAY	0.125211	-0.0996904	0.0645953	0.13038	-0.0116911	0.676728	0.12878	-0.0291313	0.865225	0.364499	-0.0468376
BIOCARTA_STRESS_PATHWAY	0.0716224	-0.00829479	0.600743	0.0656637	-0.0396336	0.845016	0.0653687	-0.0674102	0.983315	0.966486	-0.0384462
BIOCARTA_TCR_PATHWAY	0.119349	-0.0194557	0.892412	0.117461	-0.00546311	0.891028	0.114827	-0.0492355	0.980114	0.997856	-0.0247181
BIOCARTA_TNFR1_PATHWAY	0.0962583	0.0393858	0.534844	0.0966129	0.0082403	0.9222	0.0932991	-0.0693986	0.715167	0.911811	-0.0072575
BIOCARTA_TOLL_PATHWAY	0.103909	0.0249944	0.219567	0.0973229	0.00778977	0.970651	0.093881	-0.0621985	0.999848	0.797204	-0.00980477
BIOCARTA_TPO_PATHWAY	0.0942856	0.0333499	0.455621	0.0948323	0.00244819	0.766587	0.103965	0.10311	0.927005	0.894776	0.0463027
BIOCARTA_VDR_PATHWAY	0.106126	0.183531	0.00175329	0.0935721	-0.0179161	0.901264	0.0996031	0	0.997025	0.0445467	0.0552048
BIOCARTA_VEGF_PATHWAY	0.118777	-0.0904381	0.050836	0.116856	-0.0882446	0.0481894	0.136761	0.112964	0.784571	0.0515349	-0.0219062
BIOCARTA_VIP_PATHWAY	0.152343	-0.0234121	0.589964	0.141112	-0.0579618	0.403145	0.136681	-0.126776	0.864328	0.788011	-0.0693833
BIOCARTA_WNT_PATHWAY	0.0645428	0.128892	0.191197	0.0604867	0.067332	0.208646	0.0539528	-0.148291	0.780065	0.326443	0.0159775
BLALOCK_ALZHEIMERS_DISEASE_DN	0.237701	0.0129915	0.19678	0.231204	0.00775686	0.287329	0.229463	0.0186814	0.864328	0.419035	0.0131433
BLALOCK_ALZHEIMERS_DISEASE_INCIPIENT_DN	0.190053	0.0474418	0.0029729	0.181939	0.0297511	0.069673	0.175456	-0.0115059	0.999848	0.00941415	0.0218957
BLALOCK_ALZHEIMERS_DISEASE_INCIPIENT_UP	0.0698139	-0.000951717	0.754083	0.0699625	-0.0408623	0.0326444	0.0719816	0.00861345	0.994379	0.28375	-0.0110669
BLALOCK_ALZHEIMERS_DISEASE_UP	0.132139	-0.0124505	0.731858	0.134178	-0.0140314	0.680579	0.135975	-0.00242375	0.997025	0.965863	-0.00963521
BLANCO_MELO_BETA_INTERFERON_TREATED_BRONCHIAL_EPITHELIAL_CELLS_DN	0.0060783	-0.265781	0.0226643	0.00677326	-0.172579	0.372415	0.00680534	0.066089	0.967275	0.141784	-0.124091
BLANCO_MELO_BETA_INTERFERON_TREATED_BRONCHIAL_EPITHELIAL_CELLS_UP	0.0246659	-0.206388	0.000143737	0.0264163	-0.192661	4.94148e-05	0.028265	-0.0215468	0.994379	1.38357e-06	-0.140199
BLANCO_MELO_BRONCHIAL_EPITHELIAL_CELLS_INFLUENZA_A_DEL_NS1_INFECTION_DN	0.03772	0.869293	0.109376	0.0227443	0.172456	0.994306	0.0291611	0.0474124	0.987981	0.614477	0.363054
BLANCO_MELO_BRONCHIAL_EPITHELIAL_CELLS_INFLUENZA_A_DEL_NS1_INFECTION_UP	0.0357985	-0.134501	0.00386471	0.0387362	-0.0654754	0.329856	0.0393707	0.0197586	0.976387	0.0374147	-0.0600726
BLANCO_MELO_BRONCHIAL_EPITHELIAL_CELLS_INFLUENZA_A_INFECTION_DN	0.0630477	-0.144762	0.00016763	0.0661983	-0.0819378	0.00227727	0.0662154	-0.0384611	0.982916	4.69971e-05	-0.0883871
BLANCO_MELO_BRONCHIAL_EPITHELIAL_CELLS_INFLUENZA_A_INFECTION_UP	0.0198276	-0.275501	2.15664e-05	0.0212524	-0.267986	0.00672148	0.0240845	0.0381997	0.994379	2.02986e-05	-0.168429
BLANCO_MELO_COVID19_BRONCHIAL_EPITHELIAL_CELLS_SARS_COV_2_INFECTION_DN	0.0133777	0.274015	0.367502	0.0121018	0.160743	0.236126	0.00976383	-0.221054	0.999848	0.558109	0.0712349
BLANCO_MELO_COVID19_BRONCHIAL_EPITHELIAL_CELLS_SARS_COV_2_INFECTION_UP	0.0435263	-0.186051	0.00194224	0.0437645	-0.15504	0.00395625	0.0497557	0.06261	0.997025	0.000629405	-0.092827
BLANCO_MELO_COVID19_SARS_COV_2_INFECTION_A594_ACE2_EXPRESSING_CELLS_DN	0.101201	0.0495981	0.148543	0.0966707	0.037177	0.38013	0.0892487	-0.0572685	0.984031	0.44823	0.00983557
BLANCO_MELO_COVID19_SARS_COV_2_INFECTION_A594_ACE2_EXPRESSING_CELLS_RUXOLITINIB_DN	0.111549	0.00361292	0.929063	0.109542	0.00282845	0.893303	0.101055	-0.0797103	0.867353	0.995364	-0.024423
BLANCO_MELO_COVID19_SARS_COV_2_INFECTION_A594_ACE2_EXPRESSING_CELLS_RUXOLITINIB_UP	0.0428053	-0.0875209	0.286581	0.0455489	-0.0741148	0.24748	0.0469675	0.0130723	0.999848	0.506867	-0.0495212
BLANCO_MELO_COVID19_SARS_COV_2_INFECTION_A594_ACE2_EXPRESSING_CELLS_UP	0.0472052	-0.0970532	0.100412	0.0505205	-0.0591996	0.354907	0.052235	0.051395	0.940494	0.340566	-0.0349526
BLANCO_MELO_COVID19_SARS_COV_2_INFECTION_A594_CELLS_DN	0.0239034	0.239566	0.00717389	0.0202821	0.284792	0.0137978	0.0230549	0.380308	0.073113	0.000599843	0.301555
BLANCO_MELO_COVID19_SARS_COV_2_INFECTION_A594_CELLS_UP	0.00796163	-0.522717	0.0078777	0.0127794	0.109434	0.345905	0.0136485	0.0113868	0.940494	0.063473	-0.133965
BLANCO_MELO_COVID19_SARS_COV_2_INFECTION_CALU3_CELLS_UP	0.0395106	-0.0588458	0.162229	0.0390453	-0.13266	0.141006	0.0414949	-0.002472	0.997025	0.272032	-0.0646591
BLANCO_MELO_COVID19_SARS_COV_2_LOW_MOI_INFECTION_A594_ACE2_EXPRESSING_CELLS_UP	0.0626272	-0.068248	0.389139	0.0662515	-0.0415218	0.543421	0.0656871	0.0670185	0.973827	0.78846	-0.0142504
BLANCO_MELO_COVID19_SARS_COV_2_POS_PATIENT_LUNG_TISSUE_DN	0.0453624	-0.0860783	0.00237897	0.0469637	-0.0612768	0.0694844	0.0520108	0.0761487	0.536874	0.00477912	-0.0237355
BLANCO_MELO_COVID19_SARS_COV_2_POS_PATIENT_LUNG_TISSUE_UP	0.0261271	0.068697	0.982063	0.0239287	-0.009734	0.828474	0.0263123	0.110384	0.867353	0.994552	0.0564491
BLANCO_MELO_HUMAN_PARAINFLUENZA_VIRUS_3_INFECTION_A594_CELLS_DN	0.0041859	-0.0125452	0.807538	0.00481652	0.456697	0.0406783	0.00233058	-0.674531	0.980114	0.332864	-0.0767933
BLANCO_MELO_HUMAN_PARAINFLUENZA_VIRUS_3_INFECTION_A594_CELLS_UP	0.0417968	-0.0722127	0.0651129	0.0447083	-0.0438309	0.461243	0.0463442	0.0506446	0.927005	0.306079	-0.0217997
BLANCO_MELO_INFLUENZA_A_INFECTION_A594_CELLS_DN	0.0613516	-0.0603976	0.0137978	0.0617659	-0.0480846	0.00470647	0.0622307	-0.0177652	0.870808	0.00331427	-0.0420825
BLANCO_MELO_INFLUENZA_A_INFECTION_A594_CELLS_UP	0.119564	0.0812188	0.0521929	0.111455	0.0668615	0.100991	0.104278	-0.0360728	0.997025	0.105222	0.0373358
BLANCO_MELO_MERS_COV_INFECTION_MCR5_CELLS_DN	0.102518	0.00914516	0.430966	0.10374	0.0510207	0.0011035	0.099488	0.00546481	0.997025	0.0179921	0.0218769
BLANCO_MELO_MERS_COV_INFECTION_MCR5_CELLS_UP	0.0278846	0.035985	0.411881	0.02625	-0.0400194	0.452661	0.0245014	-0.0883022	0.83451	0.71436	-0.0307789
BLANCO_MELO_RESPIRATORY_SYNCYTIAL_VIRUS_INFECTION_A594_CELLS_DN	0.00197725	-0.890549	0.0413601	0.00250542	-0.750935	0.0370879	0.00111051	-1.6462	0.837847	0.038317	-1.09589
BLANCO_MELO_RESPIRATORY_SYNCYTIAL_VIRUS_INFECTION_A594_CELLS_UP	0.029888	-0.110923	0.0292593	0.0326591	-0.0544551	0.561228	0.0364552	0.147	0.824213	0.19704	-0.00612632
BLUM_RESPONSE_TO_SALIRASIB_DN	0.146104	0.192988	0.0370332	0.127761	0.0292386	0.999448	0.13637	0.0486301	0.994379	0.358999	0.0902854
BLUM_RESPONSE_TO_SALIRASIB_UP	0.122341	-0.0107549	0.568074	0.123883	0.0354344	0.201634	0.124001	-0.023101	0.973268	0.62435	0.000526134
BOCHKIS_FOXA2_TARGETS	0.060982	0.015142	0.380769	0.0592596	-0.0113498	0.72977	0.0588674	-0.0271278	0.969226	0.854376	-0.00777853
BOGNI_TREATMENT_RELATED_MYELOID_LEUKEMIA_DN	0.0744709	0.140898	0.00602819	0.0664657	0.0413975	0.562578	0.0671869	-0.0606597	0.867353	0.0700558	0.0405452
BOGNI_TREATMENT_RELATED_MYELOID_LEUKEMIA_UP	0.112843	0.0131476	0.889199	0.103184	-0.0834199	0.0406632	0.115757	0.0556934	0.886581	0.33204	-0.00485962
BOHN_PRIMARY_IMMUNODEFICIENCY_SYNDROM_DN	0.0391757	-0.1273	0.0795483	0.0397044	-0.203258	0.0831013	0.0390412	-0.118588	0.920374	0.116315	-0.149715
BOHN_PRIMARY_IMMUNODEFICIENCY_SYNDROM_UP	0.197483	0.100191	0.0400844	0.176582	-0.0024926	0.84715	0.181536	-0.0273764	0.973827	0.337975	0.0234406
BONCI_TARGETS_OF_MIR15A_AND_MIR16_1	0.053786	0.0185041	0.946178	0.0514281	-0.055824	0.81864	0.0601746	0.150446	0.778133	0.985131	0.0377086
BONOME_OVARIAN_CANCER_POOR_SURVIVAL_UP	0.0831501	-0.0809797	0.157227	0.0890505	0.0592449	0.0837703	0.085042	-0.0167525	0.994374	0.192958	-0.0128291
BONOME_OVARIAN_CANCER_SURVIVAL_OPTIMAL_DEBULKING	0.077028	-0.0923519	0.000473384	0.0794017	-0.0372764	0.0809095	0.0781815	-0.0164533	0.999848	0.00240826	-0.0486939
BONOME_OVARIAN_CANCER_SURVIVAL_SUBOPTIMAL_DEBULKING	0.0406488	-0.0313489	0.569529	0.0428905	-0.0151905	0.728393	0.0443465	0.0135175	0.994379	0.93951	-0.0110073
BOQUEST_STEM_CELL_CULTURED_VS_FRESH_DN	0.02659	-0.0762773	0.870602	0.0288212	-0.0503541	0.593919	0.0293986	0.179456	0.9484	0.964312	0.0176083
BOQUEST_STEM_CELL_CULTURED_VS_FRESH_UP	0.0741776	-0.0784193	0.00896262	0.0743571	-0.0917315	0.00207279	0.0765433	-0.030147	0.88327	0.00119314	-0.0667659
BOQUEST_STEM_CELL_DN	0.0318892	0.02174	0.880023	0.0316277	-0.0238381	0.881332	0.0326815	-0.02808	0.976387	0.997088	-0.0100594
BOQUEST_STEM_CELL_UP	0.0367623	-0.113567	0.110474	0.043367	0.075703	0.517961	0.0384357	-0.0542372	0.920374	0.435897	-0.0307003
BORCZUK_MALIGNANT_MESOTHELIOMA_DN	0.015873	-0.259623	0.0283335	0.0171802	-0.323265	0.000581969	0.0200896	-0.0899939	0.984977	0.00118296	-0.224294
BORCZUK_MALIGNANT_MESOTHELIOMA_UP	0.22358	0.0388826	0.0222164	0.215764	0.0483909	0.0525539	0.21152	0.00583659	0.976387	0.0350419	0.0310367
BORLAK_LIVER_CANCER_EGF_UP	0.191194	-0.0745135	0.00683972	0.182778	-0.127582	1.42149e-06	0.197836	0.0180621	0.999848	1.84343e-06	-0.0613446
BOSCO_ALLERGEN_INDUCED_TH2_ASSOCIATED_MODULE	0.0412236	-0.0709601	0.0525403	0.0429453	-0.101189	0.00700339	0.0456611	0.0348477	0.976387	0.0145093	-0.0457671
BOSCO_EPITHELIAL_DIFFERENTIATION_MODULE	0.0413176	-0.125053	0.00906503	0.0405968	-0.0895786	0.0829751	0.0414454	-0.0394769	0.983315	0.0252928	-0.0847028
BOSCO_INTERFERON_INDUCED_ANTIVIRAL_MODULE	0.00232647	-1.32909	0.0328343	0.00575251	-0.467064	0.054591	0.00715303	-0.129416	0.997025	0.0488663	-0.641856
BOSCO_TH1_CYTOTOXIC_MODULE	0.0141774	0.0996505	0.468194	0.0122219	-0.0538957	0.856131	0.0136648	-0.0880016	0.997025	0.934284	-0.0140822
BOUDOUKHA_BOUND_BY_IGF2BP2	0.228422	-0.0127953	0.882079	0.228584	0.0125266	0.189974	0.226762	-0.000560397	0.984031	0.729967	-0.000276383
BOYAULT_LIVER_CANCER_SUBCLASS_G1_DN	0.0841759	0.153505	0.00110427	0.0745358	0.10153	0.146607	0.0769867	0.05582	0.982172	0.00763198	0.103618
BOYAULT_LIVER_CANCER_SUBCLASS_G1_UP	0.0968965	-0.00686787	0.728715	0.0984973	-0.0197204	0.770719	0.102739	0.0166218	0.999848	0.979091	-0.00332216
BOYAULT_LIVER_CANCER_SUBCLASS_G12_UP	0.0453294	-0.0962344	0.355376	0.0540265	0.182857	0.00118996	0.049898	-0.00594265	0.976387	0.0161659	0.0268935
BOYAULT_LIVER_CANCER_SUBCLASS_G123_DN	0.0232921	0.181133	0.0822143	0.0233515	0.121867	0.696136	0.0249716	0.373814	0.702818	0.377136	0.225605
BOYAULT_LIVER_CANCER_SUBCLASS_G123_UP	0.172834	0.113859	0.00462649	0.166397	0.076949	0.681588	0.162688	0.031144	0.996414	0.0734244	0.0739839
BOYAULT_LIVER_CANCER_SUBCLASS_G2	0.0126912	-0.293307	0.457999	0.0170538	0.175628	0.260842	0.0117847	-0.415905	0.976387	0.636519	-0.177861
BOYAULT_LIVER_CANCER_SUBCLASS_G23_UP	0.0981779	0.380045	0.00194054	0.0762415	0.0852168	0.259764	0.0834298	0.0345124	0.999418	0.0188532	0.166592
BOYAULT_LIVER_CANCER_SUBCLASS_G3_DN	0.0130611	-0.133267	0.47789	0.0126479	-0.192645	0.597877	0.012899	-0.138163	0.9518	0.856618	-0.154692
BOYAULT_LIVER_CANCER_SUBCLASS_G3_UP	0.189858	0.0774836	0.00192238	0.18214	0.0384412	0.171506	0.181244	-0.00105499	0.985841	0.0134189	0.0382899
BOYAULT_LIVER_CANCER_SUBCLASS_G5_DN	0.123588	-0.020543	0.690439	0.124854	0.010571	0.800611	0.125285	0.0303484	0.886581	0.964234	0.00679216
BOYAULT_LIVER_CANCER_SUBCLASS_G6_UP	0.0365204	-0.13633	0.0038085	0.0367654	-0.103	0.0484883	0.0363444	-0.104847	0.920374	0.00804785	-0.114726
BOYLAN_MULTIPLE_MYELOMA_C_CLUSTER_DN	0.087507	-0.00333584	0.673517	0.0868107	-0.0752204	0.522828	0.0983947	0.0205648	0.976387	0.906846	-0.0193305
BOYLAN_MULTIPLE_MYELOMA_C_CLUSTER_UP	0.0418388	0.257701	0.0549789	0.0354576	0.0207269	0.743444	0.0364368	0.0205981	0.999848	0.380443	0.0996753
BOYLAN_MULTIPLE_MYELOMA_C_D_DN	0.0239675	-0.128685	0.0285352	0.0269371	-0.0387594	0.55684	0.0254728	-0.0867787	0.999848	0.217993	-0.0847409
BOYLAN_MULTIPLE_MYELOMA_C_D_UP	0.0889278	0.0674091	0.0160945	0.0848895	0.0324378	0.463481	0.0884249	0.0261353	0.997025	0.13322	0.0419941
BOYLAN_MULTIPLE_MYELOMA_C_DN	0.0704939	0.0144944	0.964802	0.0656582	-0.14467	0.113517	0.0699471	-0.028289	0.933672	0.601279	-0.0528214
BOYLAN_MULTIPLE_MYELOMA_C_UP	0.0473926	0.162225	0.103812	0.0424077	-0.020612	0.876017	0.0420193	-0.0993542	0.999848	0.570312	0.0140863
BOYLAN_MULTIPLE_MYELOMA_D_CLUSTER_DN	0.0747893	-0.0643517	0.378113	0.0831861	0.085791	0.0684408	0.0749315	-0.0567339	0.563434	0.206555	-0.0117648
BOYLAN_MULTIPLE_MYELOMA_D_CLUSTER_UP	0.0703683	0.136342	0.253973	0.0603683	0.00542625	0.874061	0.0510198	-0.304359	0.390135	0.557635	-0.0541966
BOYLAN_MULTIPLE_MYELOMA_D_DN	0.0646117	-0.223292	2.87244e-06	0.0668021	-0.191288	7.89466e-05	0.0722893	0.0325575	0.86924	5.38221e-08	-0.127341
BOYLAN_MULTIPLE_MYELOMA_D_UP	0.0503271	0.0487632	0.129678	0.0505754	0.0816656	0.148355	0.0492295	-0.020784	0.994379	0.24455	0.0365483
BOYLAN_MULTIPLE_MYELOMA_PCA1_UP	0.0238734	-0.157911	0.00851673	0.0268313	-0.0202622	0.520751	0.0267694	0.0260531	0.967275	0.0914224	-0.0507068
BOYLAN_MULTIPLE_MYELOMA_PCA3_DN	0.0334991	-0.0872668	0.900508	0.0395999	0.06675	0.308813	0.0350022	-0.0793206	0.982916	0.857792	-0.0332792
BOYLAN_MULTIPLE_MYELOMA_PCA3_UP	0.0468236	0.18398	0.000622073	0.0432228	0.0806202	0.129113	0.0440117	-0.0407383	0.994379	0.00438836	0.0746208
BRACHAT_RESPONSE_TO_CAMPTOTHECIN_DN	0.289834	0.0244173	0.469231	0.285708	0.0172519	0.738892	0.28219	0.0190427	0.999848	0.908452	0.0202373
BRACHAT_RESPONSE_TO_CAMPTOTHECIN_UP	0.0252125	-0.212167	0.0850973	0.034136	0.224989	0.322642	0.0430878	0.527777	0.783338	0.262598	0.180199
BRACHAT_RESPONSE_TO_CISPLATIN	0.0260849	-0.0652104	0.361182	0.0273619	0.0213553	0.354907	0.031808	0.287482	0.803595	0.603229	0.081209
BRACHAT_RESPONSE_TO_METHOTREXATE_DN	0.287372	0.0808971	0.310215	0.272751	0.0245039	0.42557	0.264456	0.000572922	0.940494	0.653368	0.0353246
BRACHAT_RESPONSE_TO_METHOTREXATE_UP	0.0314178	-0.113069	0.118923	0.0364588	0.0946915	0.235727	0.0393199	0.255257	0.855689	0.280356	0.0789598
BREDEMEYER_RAG_SIGNALING_NOT_VIA_ATM_DN	0.0302542	0.0345574	0.973354	0.0301839	0.0788177	0.807849	0.0282594	-0.0663427	0.996414	0.997982	0.0156775
BREDEMEYER_RAG_SIGNALING_NOT_VIA_ATM_UP	0.0285157	0.0475253	0.802823	0.0290688	-0.00354842	0.999448	0.0278129	-0.033366	0.864328	0.993775	0.00353695
BREDEMEYER_RAG_SIGNALING_VIA_ATM_NOT_VIA_NFKB_DN	0.0500713	-0.0154445	0.787325	0.049889	0.0108121	0.92592	0.0546521	0.152096	0.546526	0.933767	0.0491545
BREDEMEYER_RAG_SIGNALING_VIA_ATM_NOT_VIA_NFKB_UP	0.056151	0.175665	0.00440747	0.0534365	0.197139	0.000214323	0.0481317	-0.0148018	0.995117	0.000104499	0.119334
BRIDEAU_IMPRINTED_GENES	0.0351819	0.140278	0.022965	0.0312396	0.0393922	0.265369	0.0321076	0.0998334	0.790745	0.0991132	0.0931677
BROCKE_APOPTOSIS_REVERSED_BY_IL6	0.0771059	-0.0278984	0.221883	0.0753309	-0.0804089	0.139229	0.0747191	-0.0160496	0.914677	0.308736	-0.0414523
BROWN_MYELOID_CELL_DEVELOPMENT_DN	0.153261	0.124851	0.00202442	0.132026	-0.0157696	0.826226	0.142107	-0.0036461	0.976387	0.0457406	0.035145
BROWN_MYELOID_CELL_DEVELOPMENT_UP	0.0692419	-0.123716	8.01862e-06	0.0757937	-0.0458199	0.254994	0.075578	-0.017922	0.994374	0.000203296	-0.0624859
BROWNE_HCMV_INFECTION_10HR_DN	0.0732607	-0.0926608	0.389526	0.0767613	-0.0889647	0.0056925	0.0761766	-0.0411134	0.930223	0.0542544	-0.0742463
BROWNE_HCMV_INFECTION_10HR_UP	0.0520984	-0.101703	0.031545	0.0552141	0.0152051	0.651868	0.0543117	-0.0159664	0.982172	0.25278	-0.0341547
BROWNE_HCMV_INFECTION_12HR_DN	0.0444997	0.0239491	0.911447	0.0464135	-0.00472574	0.419412	0.0422936	-0.0869011	0.824469	0.889172	-0.0225592
BROWNE_HCMV_INFECTION_12HR_UP	0.0301265	0.0150876	0.686269	0.0308298	0.0278109	0.936758	0.0320988	0.031961	0.996414	0.989415	0.0249532
BROWNE_HCMV_INFECTION_14HR_DN	0.0544346	-0.0105339	0.879916	0.055913	-0.0348926	0.167929	0.0583537	0.0727212	0.621743	0.573012	0.00909824
BROWNE_HCMV_INFECTION_14HR_UP	0.062847	0.0438977	0.101537	0.0621992	0.0445488	0.22993	0.0618844	-0.0401905	0.987981	0.273875	0.0160853
BROWNE_HCMV_INFECTION_16HR_DN	0.0795228	0.0147406	0.584077	0.0776382	-0.014496	0.475051	0.0722182	-0.0728425	0.736182	0.786368	-0.0241993
BROWNE_HCMV_INFECTION_16HR_UP	0.0287798	-0.0157365	0.629434	0.0310325	-0.0164146	0.741077	0.0325863	-0.0495473	0.997025	0.9574	-0.0272328
BROWNE_HCMV_INFECTION_18HR_DN	0.0556101	-0.127565	0.000929698	0.0582109	-0.0526278	0.0674058	0.0569848	-0.0102891	0.976387	0.00353428	-0.0634941
BROWNE_HCMV_INFECTION_18HR_UP	0.0551205	0.0754351	0.0582885	0.0542958	0.0430292	0.443642	0.0542516	-0.00716221	0.997025	0.292598	0.0371007
BROWNE_HCMV_INFECTION_1HR_DN	0.0308976	-0.0743031	0.0087717	0.0323751	-0.0786711	0.220716	0.03371	-0.00921513	0.994379	0.0515968	-0.0540631
BROWNE_HCMV_INFECTION_1HR_UP	0.0294386	0.114936	0.988934	0.0296706	0.0966601	0.493306	0.0264384	0.0694849	0.976194	0.96057	0.0936937
BROWNE_HCMV_INFECTION_20HR_DN	0.0499373	-0.0466545	0.417365	0.0534387	-0.0189624	0.593919	0.0544151	0.0529551	0.976194	0.828912	-0.0042206
BROWNE_HCMV_INFECTION_20HR_UP	0.0390952	0.0481012	0.188867	0.037453	-0.0268209	0.628121	0.0388445	-0.0416292	0.976387	0.634633	-0.00678298
BROWNE_HCMV_INFECTION_24HR_DN	0.0973605	-0.0376532	0.0927718	0.0940023	-0.0890276	0.0094117	0.0985034	0.00939498	0.964113	0.0278999	-0.0390953
BROWNE_HCMV_INFECTION_24HR_UP	0.0588578	0.0654754	0.0148342	0.0555439	0.0200489	0.958527	0.0563338	0.0103377	0.985203	0.201393	0.031954
BROWNE_HCMV_INFECTION_2HR_DN	0.100412	0.228516	0.0294888	0.0855603	0.0343483	0.95138	0.0827231	-0.0595682	0.927005	0.294099	0.0677655
BROWNE_HCMV_INFECTION_2HR_UP	0.0785274	0.0297473	0.444476	0.0810229	0.00203966	0.84715	0.0813205	0.126861	0.928848	0.91017	0.0528826
BROWNE_HCMV_INFECTION_30MIN_DN	0.0226044	-0.187032	0.0458838	0.0257572	-0.000953852	0.819922	0.0277784	0.0423932	0.994379	0.362281	-0.048531
BROWNE_HCMV_INFECTION_30MIN_UP	0.0677406	-0.0620998	0.126341	0.0677694	-0.0832804	0.219403	0.066395	-0.0124766	0.997025	0.304771	-0.0526189
BROWNE_HCMV_INFECTION_48HR_DN	0.0724749	-0.0555045	0.0104362	0.0748025	-0.032561	0.184309	0.0765099	0.0249354	0.940494	0.0493037	-0.0210434
BROWNE_HCMV_INFECTION_48HR_UP	0.0458951	0.0714528	0.0950258	0.0432712	-0.0202815	0.724368	0.0469842	0.0686239	0.915848	0.478087	0.0399317
BROWNE_HCMV_INFECTION_4HR_DN	0.0380068	0.0388649	0.418366	0.0360697	-0.0743066	0.0412343	0.0363027	-0.0402552	0.980114	0.226618	-0.0252323
BROWNE_HCMV_INFECTION_4HR_UP	0.0471074	0.0943341	0.525058	0.0400502	0.0149626	0.976186	0.0414033	-0.0997991	0.973827	0.96648	0.00316587
BROWNE_HCMV_INFECTION_6HR_DN	0.0203679	-0.0513306	0.486469	0.021977	-0.15081	0.0842995	0.0219236	-0.0827163	0.9484	0.370194	-0.0949522
BROWNE_HCMV_INFECTION_6HR_UP	0.0411154	0.0437147	0.747003	0.0415345	0.0867506	0.437128	0.0380293	-0.0871917	0.915848	0.877939	0.0144245
BROWNE_HCMV_INFECTION_8HR_DN	0.0435386	0.125638	0.451332	0.0383232	-0.0833182	0.93019	0.0332681	-0.179755	0.892961	0.923136	-0.0458115
BROWNE_HCMV_INFECTION_8HR_UP	0.0690731	0.0605789	0.716744	0.0669975	0.0417658	0.706867	0.065632	-0.0462487	0.88327	0.95199	0.0186987
BROWNE_INTERFERON_RESPONSIVE_GENES	0.0237161	-0.181069	0.0874954	0.031309	0.0999164	0.935465	0.0353369	0.153947	0.942883	0.528088	0.0242648
BRUECKNER_TARGETS_OF_MIRLET7A3_DN	0.157731	-0.0147065	0.724754	0.154812	-0.00765573	0.853996	0.155552	-0.000966098	0.985203	0.986014	-0.0077761
BRUECKNER_TARGETS_OF_MIRLET7A3_UP	0.0559249	-0.0263294	0.114326	0.0582385	-0.0667627	0.086025	0.066264	0.113228	0.775548	0.135492	0.00671196
BRUINS_UVC_RESPONSE_EARLY_LATE	0.0643117	0.0128093	0.924811	0.0623737	-0.0463993	0.013736	0.0655139	-0.00023956	0.997025	0.188872	-0.0112765
BRUINS_UVC_RESPONSE_LATE	0.106944	-0.0113665	0.351127	0.107244	0.000527434	0.962798	0.107823	0.00622588	0.938413	0.890546	-0.00153773
BRUINS_UVC_RESPONSE_MIDDLE	0.0245177	0.0550679	0.765082	0.0229673	-0.187386	0.125751	0.0242278	-0.116952	0.997025	0.584352	-0.0830902
BRUINS_UVC_RESPONSE_VIA_TP53_GROUP_A	0.0347304	-0.071182	0.0381923	0.0363653	-0.0343034	0.480795	0.036362	-0.00623307	0.92401	0.227111	-0.0372395
BRUINS_UVC_RESPONSE_VIA_TP53_GROUP_B	0.0543951	-0.0905201	0.0291362	0.0571225	-0.051026	0.555226	0.0573632	-0.00146652	0.997025	0.220061	-0.0476709
BRUINS_UVC_RESPONSE_VIA_TP53_GROUP_C	0.0363477	-0.0826339	0.152285	0.0351303	-0.166054	0.00360522	0.0393767	0.052692	0.976387	0.0197758	-0.0653318
BRUINS_UVC_RESPONSE_VIA_TP53_GROUP_D	0.0401452	0.00936639	0.874752	0.0411827	0.00966477	0.680272	0.0400136	-0.0792824	0.86924	0.970632	-0.0200838
BRUNO_HEMATOPOIESIS	0.112592	-0.124808	0.000159572	0.120058	-0.0552286	0.0217741	0.123337	0.0219379	0.931533	0.00030275	-0.0526996
BUFFA_HYPOXIA_METAGENE	0.266837	-0.0165422	0.612652	0.285367	0.0419529	0.448148	0.281386	0.0367939	0.92401	0.840313	0.0207349
BURTON_ADIPOGENESIS_1	0.0863663	-0.126617	0.404766	0.081471	-0.251472	0.0308417	0.100792	0.201278	0.938413	0.179639	-0.0589369
BURTON_ADIPOGENESIS_10	0.0626677	-0.0311384	0.432345	0.0648833	0.0110204	0.614018	0.0668962	0.0831691	0.950431	0.839004	0.021017
BURTON_ADIPOGENESIS_11	0.0506515	-0.1187	0.0294704	0.0487847	-0.270202	0.000276349	0.0578662	0.0471204	0.976387	0.00064951	-0.113927
BURTON_ADIPOGENESIS_12	0.0638899	0.0347546	0.259699	0.0667634	0.0356451	0.592114	0.0718687	0.055775	0.9518	0.697862	0.0420582
BURTON_ADIPOGENESIS_2	0.121645	0.0471327	0.0588332	0.121656	0.115405	0.000331563	0.10979	-0.0708463	0.653415	0.000965898	0.0305637
BURTON_ADIPOGENESIS_3	0.10798	0.723271	0.0109966	0.0666386	0.209733	0.583432	0.0774905	0.0283187	0.976387	0.118645	0.320441
BURTON_ADIPOGENESIS_4	0.15132	-0.0392849	0.498331	0.149828	0.0365302	0.46925	0.148552	0	0.994374	0.819128	-0.000918236
BURTON_ADIPOGENESIS_5	0.169895	0.0586355	0.091587	0.160864	0.0903158	0.0308417	0.153062	0.00189142	0.993559	0.0677446	0.0502809
BURTON_ADIPOGENESIS_6	0.106107	0.0204728	0.427893	0.103094	-0.0210873	0.941848	0.100939	0.00611023	0.999848	0.935662	0.00183193
BURTON_ADIPOGENESIS_7	0.163796	-0.0753034	0.00194054	0.154722	-0.108449	0.00379984	0.1531	-0.086506	0.783338	0.000495621	-0.0900863
BURTON_ADIPOGENESIS_8	0.138661	-0.164599	7.45792e-06	0.146379	-0.109466	6.20306e-05	0.150533	-0.0318374	0.824469	9.8349e-08	-0.101967
BURTON_ADIPOGENESIS_9	0.0885517	-0.0558736	0.138187	0.0935694	-0.00267952	0.999448	0.086509	-0.0607372	0.941923	0.665978	-0.0397634
BURTON_ADIPOGENESIS_PEAK_AT_0HR	0.0892904	0.0954089	0.308202	0.0915009	0.134318	0.000504692	0.0857869	0.00446767	0.997025	0.00748151	0.0780649
BURTON_ADIPOGENESIS_PEAK_AT_16HR	0.0980607	0.250709	0.00248731	0.0827828	0.0558532	0.627289	0.0885386	0.0136749	0.976387	0.0434572	0.106746
BURTON_ADIPOGENESIS_PEAK_AT_24HR	0.103211	0.549478	0.0248354	0.0852037	0.392946	0.0398448	0.0751183	-0.0303057	0.997025	0.0314464	0.304039
BURTON_ADIPOGENESIS_PEAK_AT_2HR	0.148088	-0.0237038	0.591863	0.152307	-0.0158489	0.796328	0.149828	0.049685	0.940494	0.950606	0.00337741
BURTON_ADIPOGENESIS_PEAK_AT_8HR	0.126755	0.0644304	0.460136	0.119702	0.00972217	0.918817	0.108273	-0.0824127	0.861193	0.917787	-0.00275337
BUYTAERT_PHOTODYNAMIC_THERAPY_STRESS_DN	0.0657096	0.0136361	0.947677	0.0643859	-0.00142114	0.872532	0.065717	0.0221308	0.927005	0.99743	0.0114486
BUYTAERT_PHOTODYNAMIC_THERAPY_STRESS_UP	0.0782659	0.000697314	0.422887	0.0779394	-0.0614958	0.407557	0.0805353	-0.00383437	0.994379	0.740278	-0.0215443
BYSTROEM_CORRELATED_WITH_IL5_DN	0.0693434	0.0314944	0.266757	0.061618	-0.139758	0.120508	0.0718081	0.116387	0.97336	0.327472	0.00270778
BYSTROEM_CORRELATED_WITH_IL5_UP	0.0933174	0.0284045	0.761809	0.0887469	-0.0161397	0.819922	0.0947151	0.0091535	0.973827	0.985829	0.00713942
BYSTRYKH_HEMATOPOIESIS_STEM_CELL_AND_BRAIN_QTL_CIS	0.136657	0.0407851	0.0383941	0.131404	0.0171242	0.982301	0.138137	0.0913626	0.736182	0.305592	0.0497573
BYSTRYKH_HEMATOPOIESIS_STEM_CELL_AND_BRAIN_QTL_TRANS	0.0938143	0.00186643	0.858082	0.089817	-0.00869845	0.990584	0.0916363	0.00882736	0.994379	0.999301	0.000665114
BYSTRYKH_HEMATOPOIESIS_STEM_CELL_QTL_CIS	0.106858	0.00263816	0.530556	0.107547	0.0311925	0.487636	0.100958	-0.0368209	0.999848	0.844935	-0.000996741
BYSTRYKH_HEMATOPOIESIS_STEM_CELL_QTL_TRANS	0.0904715	0.0551904	6.61998e-08	0.0875409	0.0250667	0.000490417	0.0882768	0.0176638	0.864328	8.99237e-09	0.0326403
CADWELL_ATG16L1_TARGETS_DN	0.0325723	0.0307435	0.486977	0.0348358	0.162976	0.0666223	0.0330628	-0.0952486	0.976387	0.329788	0.0328238
CADWELL_ATG16L1_TARGETS_UP	0.0141488	0.0649498	0.872612	0.0127347	-0.0914403	0.517486	0.0128778	-0.11852	0.933786	0.943011	-0.048337
CAFFAREL_RESPONSE_TO_THC_24HR_5_DN	0.203757	0.00903388	0.944077	0.197188	0.0119079	0.968468	0.194109	-0.0195802	0.997025	0.999877	0.000453848
CAFFAREL_RESPONSE_TO_THC_24HR_5_UP	0.218114	0.0543139	0.0567289	0.209952	0.0189232	0.581158	0.192816	-0.0618647	0.783338	0.292886	0.0037908
CAFFAREL_RESPONSE_TO_THC_DN	0.183304	0.0432667	0.214176	0.176103	0.0243251	0.717138	0.179993	0.0466175	0.940494	0.694319	0.0380697
CAFFAREL_RESPONSE_TO_THC_UP	0.107991	-0.0433169	0.204218	0.113612	0.0577287	0.552971	0.11465	-0.00635822	0.976387	0.621397	0.00268452
CAIRO_HEPATOBLASTOMA_CLASSES_DN	0.0515193	-0.070159	0.205098	0.0513907	-0.0901739	0.0409884	0.0505631	-0.0356659	0.976387	0.14229	-0.0653329
CAIRO_HEPATOBLASTOMA_CLASSES_UP	0.243546	0.111943	5.88595e-06	0.225994	0.0401361	0.118799	0.224494	-0.00212815	0.996414	8.05905e-05	0.0499837
CAIRO_HEPATOBLASTOMA_DN	0.026903	0.0340258	0.647498	0.0270262	0.0116563	0.989707	0.0251631	-0.0279905	0.870808	0.9785	0.0058972
CAIRO_HEPATOBLASTOMA_UP	0.079207	-0.0313324	0.333972	0.0784631	-0.0448774	0.193431	0.0789597	-0.0486673	0.996414	0.48312	-0.0416257
CAIRO_LIVER_DEVELOPMENT_DN	0.0146044	-0.429354	1.12936e-07	0.0171637	-0.298779	9.24437e-06	0.0180436	-0.0929889	0.920374	3.95415e-10	-0.273707
CAIRO_LIVER_DEVELOPMENT_UP	0.0868144	0.0463407	0.0310817	0.0851231	0.0558564	0.00211065	0.0840309	0.014996	0.997025	0.00373151	0.0390644
CAIRO_PML_TARGETS_BOUND_BY_MYC_UP	0.257729	0.048305	0.0178869	0.254159	0.0551394	0.0780548	0.258705	0.0332458	0.864328	0.0365616	0.0455634
CAMPS_COLON_CANCER_COPY_NUMBER_DN	0.0640857	-0.0569999	0.342599	0.0645035	-0.100347	0.00624104	0.0746949	0.112871	0.949361	0.0536265	-0.0148252
CAMPS_COLON_CANCER_COPY_NUMBER_UP	0.0929662	0.0424701	0.129765	0.0907613	0.0655861	0.0287693	0.0869127	0.00326996	0.997025	0.0827685	0.0371087
CARD_MIR302A_TARGETS	0.0913719	-0.0396364	0.346439	0.0955952	-0.0137832	0.535169	0.100447	0.0750284	0.814366	0.706266	0.00720296
CASORELLI_ACUTE_PROMYELOCYTIC_LEUKEMIA_DN	0.167161	0.0877325	0.000577322	0.157794	0.0519829	0.158504	0.157294	0.00123691	0.996414	0.00488473	0.0469841
CASORELLI_ACUTE_PROMYELOCYTIC_LEUKEMIA_UP	0.104994	-0.0124224	0.440475	0.102191	-0.0731189	0.0188692	0.0961845	-0.0774549	0.920374	0.135755	-0.0543321
CASORELLI_APL_SECONDARY_VS_DE_NOVO_UP	0.100804	0.0266556	0.66393	0.103302	0.0463755	0.632558	0.101669	0.0787605	0.976387	0.938542	0.0505972
CASTELLANO_NRAS_TARGETS_UP	0.0538426	-0.0654353	0.358124	0.0603403	0.0853135	0.301777	0.0588701	0.0375212	0.957298	0.604387	0.0191331
CEBALLOS_TARGETS_OF_TP53_AND_MYC_DN	0.10194	-0.0589796	0.0746478	0.0894313	-0.119117	0.0157351	0.101458	0.0599135	0.886039	0.0327324	-0.0393945
CERIBELLI_GENES_INACTIVE_AND_BOUND_BY_NFY	0	NA	0.754178	0	NA	0.325621	0.00126158	Inf	0.870808	0.79811	NA
CERVERA_SDHB_TARGETS_1_DN	0.0228909	0.314511	0.312824	0.0273894	0.615584	2.41415e-05	0.0159587	-0.28465	0.994379	0.000618876	0.215148
CERVERA_SDHB_TARGETS_1_UP	0.0362461	-0.22906	1.25993e-06	0.0410505	-0.173936	0.000407176	0.0383251	-0.148598	0.920374	1.19473e-07	-0.183864
CERVERA_SDHB_TARGETS_2	0.0187977	0.000581104	0.882533	0.0199858	-0.0108844	0.854935	0.0198042	-0.0245966	0.997025	0.99689	-0.0116333
CHANDRAN_METASTASIS_DN	0.0466031	-0.0296939	0.118436	0.047099	-0.0732733	0.0507217	0.047722	0.0227282	0.973827	0.113244	-0.0267463
CHANDRAN_METASTASIS_TOP50_DN	0.15212	0.0374873	0.488314	0.15044	0.0691454	0.0561562	0.148574	0.098677	0.24716	0.125147	0.0684366
CHANDRAN_METASTASIS_TOP50_UP	0.194064	-0.0429552	0.652713	0.187927	-0.0968038	0.00939741	0.204682	0.0604224	0.889889	0.107999	-0.0264455
CHANDRAN_METASTASIS_UP	0.085397	-0.0624849	0.295522	0.0874569	-0.0653317	0.136558	0.0876932	-0.0803216	0.931533	0.363268	-0.0693794
CHANG_IMMORTALIZED_BY_HPV31_DN	0.0805352	-0.0878629	0.0292593	0.0839826	-0.0530171	0.435283	0.0915456	0.0678666	0.861193	0.172149	-0.0243378
CHANG_IMMORTALIZED_BY_HPV31_UP	0.0338862	-0.0597831	0.334149	0.0382541	-0.023858	0.628121	0.036547	-0.0628786	0.892961	0.763965	-0.0488399
CHANGOLKAR_H2AFY_TARGETS_DN	0.0524394	0.0588274	0.417925	0.0483738	-0.0619977	0.611781	0.0508823	-0.0205639	0.997025	0.841459	-0.00791141
CHANGOLKAR_H2AFY_TARGETS_UP	0.049133	0.0230222	0.799864	0.0478529	0.00931243	0.901603	0.0437044	-0.109664	0.814366	0.983049	-0.0257764
CHARAFE_BREAST_CANCER_BASAL_VS_MESENCHYMAL_DN	0.0225535	-0.109818	0.165029	0.0290217	0.103065	0.649358	0.0252835	0.159892	0.933672	0.5955	0.0510464
CHARAFE_BREAST_CANCER_BASAL_VS_MESENCHYMAL_UP	0.0349087	-0.0695706	0.00751373	0.0341997	-0.0935227	0.0518491	0.0329114	-0.116764	0.867353	0.013832	-0.0932856
CHARAFE_BREAST_CANCER_LUMINAL_VS_BASAL_DN	0.0833701	-0.0804158	0.00418754	0.0879752	-0.0309773	0.164601	0.0908348	0.0318274	0.999848	0.0239689	-0.0265219
CHARAFE_BREAST_CANCER_LUMINAL_VS_BASAL_UP	0.0434134	-0.0143012	0.82488	0.0432994	-0.0207217	0.584133	0.0446826	0.0162564	0.994379	0.961361	-0.00625552
CHARAFE_BREAST_CANCER_LUMINAL_VS_MESENCHYMAL_DN	0.0838677	-0.0907357	0.000315253	0.0866309	-0.0645391	0.0056925	0.0850923	-0.0471165	0.897649	0.000166405	-0.0674638
CHARAFE_BREAST_CANCER_LUMINAL_VS_MESENCHYMAL_UP	0.0263104	-0.0775399	0.0166662	0.0264792	-0.048304	0.318568	0.0260669	-0.0269431	0.997025	0.105747	-0.050929
CHAUHAN_RESPONSE_TO_METHOXYESTRADIOL_DN	0.286935	-0.0546993	0.000839847	0.28959	-0.0170607	0.3589	0.285914	-0.00869608	0.997025	0.0126208	-0.0268187
CHAUHAN_RESPONSE_TO_METHOXYESTRADIOL_UP	0.259842	0.0123856	0.388557	0.252209	0.0426762	0.303676	0.252466	-0.00425643	0.999848	0.63958	0.0169351
CHEBOTAEV_GR_TARGETS_DN	0.0243622	-0.0178935	0.959042	0.0242166	-0.0501812	0.728393	0.0283794	0.157237	0.824213	0.981356	0.0297209
CHEBOTAEV_GR_TARGETS_UP	0.0192654	0.212687	0.00457089	0.0181601	0.262002	0.00371813	0.0158044	-0.10561	0.985171	0.00121338	0.123027
CHEMNITZ_RESPONSE_TO_PROSTAGLANDIN_E2_DN	0.0324979	-0.0104611	0.557699	0.0329087	0.0161768	0.916561	0.0354066	0.0873326	0.861193	0.949585	0.0310161
CHEMNITZ_RESPONSE_TO_PROSTAGLANDIN_E2_UP	0.0937187	0.26145	0.057863	0.0803717	0.0720779	0.624967	0.0890614	0.0754119	0.997599	0.355	0.136313
CHEN_ETV5_TARGETS_SERTOLI	0.0177495	-0.46857	0.000641865	0.0168886	-0.543269	1.00695e-05	0.0191168	-0.184501	0.997025	1.27406e-06	-0.39878
CHEN_HOXA5_TARGETS_9HR_DN	0.0642221	-0.0468154	0.695149	0.0600125	-0.0744285	0.503936	0.0583126	-0.0746608	0.870808	0.882236	-0.0653016
CHEN_HOXA5_TARGETS_9HR_UP	0.0795745	0.0460969	0.691244	0.0770815	-0.0643845	0.384862	0.0801655	0.0351596	0.976387	0.845913	0.00562399
CHEN_LIVER_METABOLISM_QTL_CIS	0.055528	-0.0670009	0.154628	0.0628893	0.0975529	0.0152169	0.0546307	-0.0739891	0.824469	0.0518852	-0.014479
CHEN_LUNG_CANCER_SURVIVAL	0.323492	-0.0479755	0.0103294	0.312617	-0.0389077	0.0317526	0.322505	0.0313742	0.811912	0.0114786	-0.018503
CHEN_LVAD_SUPPORT_OF_FAILING_HEART_DN	0.0370537	0.0496891	0.969167	0.0365669	0.029101	0.851015	0.0404614	0.175862	0.560018	0.956459	0.0848842
CHEN_LVAD_SUPPORT_OF_FAILING_HEART_UP	0.077704	-0.0901843	0.119454	0.0809394	-0.0896252	0.288515	0.0789631	-0.0838527	0.950431	0.336152	-0.0878874
CHEN_METABOLIC_SYNDROM_NETWORK	0.0807203	-0.0600789	0.000143737	0.0838125	-0.0222683	0.281341	0.082754	-0.00820595	0.920374	0.00235244	-0.0301844
CHEN_NEUROBLASTOMA_COPY_NUMBER_GAINS	0.0930402	0.0605968	0.200645	0.0898718	0.0341174	0.645419	0.0929868	0.0163866	0.994379	0.663224	0.0370336
CHENG_IMPRINTED_BY_ESTRADIOL	0.0305546	-0.0232724	0.380769	0.0325039	-0.00744525	0.891379	0.034759	0.121067	0.435884	0.700769	0.0301164
CHENG_RESPONSE_TO_NICKEL_ACETATE	0.113405	0.152931	2.88416e-05	0.105548	0.0957809	0.0052307	0.110302	0.147131	0.783338	1.70374e-05	0.131948
CHEOK_RESPONSE_TO_HD_MTX_DN	0.0791073	0.327805	0.0028442	0.0705695	0.177836	0.0367556	0.0600058	-0.00386053	0.985203	0.00538911	0.16726
CHEOK_RESPONSE_TO_MERCAPTOPURINE_AND_HD_MTX_DN	0.0700843	0.403199	1.12936e-07	0.0480222	0.0940823	0.0521547	0.0556999	0.174692	0.563434	7.00613e-07	0.223991
CHESLER_BRAIN_HIGHEST_EXPRESSION	0.288557	0.0380623	0.0822143	0.277734	0.0364259	0.0523615	0.276028	0.00776883	0.924778	0.0867698	0.027419
CHESLER_BRAIN_HIGHEST_GENETIC_VARIANCE	0.0865595	0.0635333	0.178689	0.0856657	0.0841485	0.00159914	0.0837723	0.041645	0.736182	0.00953131	0.0631089
CHESLER_BRAIN_QTL_CIS	0.107864	0.0416159	0.0621971	0.104623	0.0804432	0.00959658	0.101106	-0.0249845	0.996414	0.0214168	0.0323582
CHIANG_LIVER_CANCER_SUBCLASS_CTNNB1_DN	0.0376014	-0.12147	0.0733738	0.0443376	0.054045	0.341211	0.0415622	0.0350821	0.997025	0.287057	-0.010781
CHIANG_LIVER_CANCER_SUBCLASS_CTNNB1_UP	0.00881574	-0.251074	0.0384542	0.0130653	0.181195	0.12746	0.0102459	-0.134216	0.985203	0.0992538	-0.0680315
CHIANG_LIVER_CANCER_SUBCLASS_INTERFERON_DN	0	NA	0.453841	0	#NAME?	0.463939	0.000875061	4.16992	0.977742	0.78838	NA
CHIANG_LIVER_CANCER_SUBCLASS_POLYSOMY7_DN	0.0349328	0.126964	0.485005	0.0288155	-0.297854	0.0392251	0.0261042	-0.330936	0.764034	0.206148	-0.167275
CHIANG_LIVER_CANCER_SUBCLASS_POLYSOMY7_UP	0.00873873	-0.0762918	0.230495	0.00956052	0.0407419	0.732456	0.00653958	-0.532085	0.435884	0.516109	-0.189212
CHIANG_LIVER_CANCER_SUBCLASS_PROLIFERATION_DN	0.0139407	-0.0573247	0.54967	0.0153054	0.0738217	0.442167	0.0144096	0.0709313	0.976387	0.824143	0.0291428
CHIANG_LIVER_CANCER_SUBCLASS_PROLIFERATION_UP	0.0674132	0.25376	0.256535	0.0568891	-0.00450345	0.509372	0.062385	0.0189112	0.996414	0.666214	0.0893893
CHIANG_LIVER_CANCER_SUBCLASS_UNANNOTATED_DN	0.203693	0.0253717	0.0613321	0.189607	-0.00613154	0.916561	0.189494	-0.0108346	0.976387	0.445391	0.00280186
CHIANG_LIVER_CANCER_SUBCLASS_UNANNOTATED_UP	0.0673489	0.00257365	0.908903	0.071435	0.00313458	0.881937	0.0706998	0.0780027	0.824469	0.991292	0.0279036
CHIARADONNA_NEOPLASTIC_TRANSFORMATION_CDC25_DN	0.108503	-0.157278	0.000259622	0.111792	-0.0864376	0.0756816	0.113568	-0.028668	0.927005	0.00130166	-0.0907947
CHIARADONNA_NEOPLASTIC_TRANSFORMATION_CDC25_UP	0.105576	-0.0102288	0.593703	0.106681	0.0285265	0.17912	0.10389	-0.0263878	0.987981	0.608494	-0.00269668
CHIARADONNA_NEOPLASTIC_TRANSFORMATION_KRAS_CDC25_DN	0.0736006	0.0129158	0.970602	0.0787464	0.151944	0.000503316	0.0686443	-0.11026	0.976387	0.0180749	0.0182
CHIARADONNA_NEOPLASTIC_TRANSFORMATION_KRAS_CDC25_UP	0.183291	-0.0936035	0.0335041	0.191771	0.0407152	0.26332	0.176575	-0.100512	0.606695	0.106555	-0.0511335
CHIARADONNA_NEOPLASTIC_TRANSFORMATION_KRAS_DN	0.0556664	-0.179801	0.00851673	0.0582254	-0.163562	0.00826026	0.0577169	-0.106198	0.9518	0.00380338	-0.149854
CHIARADONNA_NEOPLASTIC_TRANSFORMATION_KRAS_UP	0.135727	0.0848446	0.163456	0.122572	0.00322393	0.820871	0.135642	0.085993	0.999848	0.674308	0.0580205
CHIARETTI_ACUTE_LYMPHOBLASTIC_LEUKEMIA_ZAP70	0.0166821	0.24307	0.225887	0.0180722	0.20177	0.112898	0.015873	-0.0874018	0.976387	0.28664	0.119146
CHIARETTI_T_ALL_REFRACTORY_TO_THERAPY	0.079469	0.0313996	0.912593	0.0777139	0.0566822	0.173723	0.0841888	0.198579	0.517333	0.543602	0.0955535
CHIBA_RESPONSE_TO_TSA	0.17664	-0.0511821	0.210008	0.186396	0.0337144	0.592114	0.175929	-0.022338	0.994379	0.652251	-0.0132686
CHIBA_RESPONSE_TO_TSA_UP	0.135379	0.0204951	0.601645	0.135204	0.0427819	0.245915	0.12879	0.00114417	0.996414	0.699818	0.0214737
CHICAS_RB1_TARGETS_CONFLUENT	0.0948837	-0.0712393	0.000419789	0.0966484	-0.0323464	0.190649	0.093415	-0.0692674	0.435884	0.00223028	-0.0576177
CHICAS_RB1_TARGETS_GROWING	0.0935857	0.253802	0.00369918	0.0820843	0.0975685	0.195404	0.0903937	0.104931	0.994379	0.0247488	0.1521
CHICAS_RB1_TARGETS_LOW_SERUM	0.24572	-0.00411422	0.724498	0.247316	-0.0131737	0.253276	0.233992	-0.0325835	0.973827	0.751386	-0.0166238
CHICAS_RB1_TARGETS_SENESCENT	0.0909846	0.0619486	0.0329742	0.085705	-0.00225196	0.499781	0.0893884	0.0113189	0.952096	0.2163	0.0236718
CHIN_BREAST_CANCER_COPY_NUMBER_UP	0.0942478	0.159296	0.0432299	0.0826844	-0.0629438	0.545684	0.0850443	-0.0793451	0.976387	0.27364	0.00566919
CHNG_MULTIPLE_MYELOMA_HYPERPLOID_DN	0.103509	0.0386269	0.0588001	0.102484	0.116309	0.0198923	0.0958373	3.58444e-08	0.996414	0.0356252	0.0516452
CHNG_MULTIPLE_MYELOMA_HYPERPLOID_UP	0.589004	-4.06592e-05	0.910948	0.588233	0.00266536	0.792034	0.587363	0.00898479	0.994379	0.995233	0.00386983
CHO_NR4A1_TARGETS	0.0438294	-0.164451	0.19223	0.0487036	0.0056362	0.870458	0.0397276	-0.463188	0.390135	0.486532	-0.207334
CHOI_ATL_STAGE_PREDICTOR	0.236102	0.054407	0.0264338	0.224307	-0.000335379	0.883581	0.229327	0.0133951	0.989786	0.274244	0.0224889
CHOW_RASSF1_TARGETS_DN	0.188408	0.00349415	0.728225	0.189459	0.0842608	0.01355	0.182889	0.00580331	0.973827	0.15791	0.0311861
CHOW_RASSF1_TARGETS_UP	0.105298	0.0909123	0.223437	0.0910482	-0.133663	0.479771	0.107337	0.0734198	0.933672	0.595587	0.0102232
CHUNG_BLISTER_CYTOTOXICITY_DN	0.0307479	-0.130698	0.0854843	0.0345115	-0.0313709	0.287033	0.0334107	-0.0273594	0.900808	0.266957	-0.0631428
CHUNG_BLISTER_CYTOTOXICITY_UP	0.121145	0.0247637	0.097306	0.116743	0.02959	0.483353	0.114508	-0.0161893	0.994379	0.409326	0.0127215
CHYLA_CBFA2T3_TARGETS_DN	0.0155961	-0.0488564	0.152285	0.0159697	-0.0388262	0.560923	0.0164983	-0.0102028	0.976387	0.547905	-0.0326285
CHYLA_CBFA2T3_TARGETS_UP	0.0363215	-0.114573	8.67357e-06	0.038384	-0.0991618	0.00295013	0.040975	0.016478	0.984031	4.32015e-06	-0.0657521
CLASPER_LYMPHATIC_VESSELS_DURING_METASTASIS_DN	0.0692862	0.0277491	0.783052	0.0682709	0.0107681	0.937387	0.0769418	0.273812	0.908652	0.991802	0.10411
COATES_MACROPHAGE_M1_VS_M2_DN	0.0306813	-0.299319	0.00340031	0.0346113	-0.264494	0.0397105	0.0392268	0	0.996414	0.00667875	-0.187938
COATES_MACROPHAGE_M1_VS_M2_UP	0.0263788	-0.031574	0.86487	0.0260826	0.0570076	0.759275	0.0257168	-0.00585272	0.994374	0.990594	0.00652697
COLDREN_GEFITINIB_RESISTANCE_DN	0.023342	-0.0468751	0.0205852	0.0241537	-0.00267746	0.868454	0.0233216	-0.0655997	0.736182	0.193559	-0.0383841
COLDREN_GEFITINIB_RESISTANCE_UP	0.0470163	-0.0283966	0.442692	0.0475298	-0.0342772	0.291421	0.0516152	0.124168	0.57891	0.519818	0.020498
COLIN_PILOCYTIC_ASTROCYTOMA_VS_GLIOBLASTOMA_DN	0.206447	-0.11456	0.0005751	0.216684	-0.0760784	0.0215199	0.210856	-0.0466511	0.864328	0.000833786	-0.0790964
COLIN_PILOCYTIC_ASTROCYTOMA_VS_GLIOBLASTOMA_UP	0.0592502	-0.0448864	0.613373	0.0542463	-0.101385	0.147675	0.0607137	0.0226795	0.976387	0.563083	-0.0411973
COLINA_TARGETS_OF_4EBP1_AND_4EBP2	0.0590339	-0.00851078	0.766038	0.0621257	0.036614	0.676728	0.0604816	-0.0226782	0.999848	0.970862	0.00180835
COLLER_MYC_TARGETS_UP	0.311327	0.143915	1.12704e-05	0.286785	0.0840166	0.00395625	0.293215	0.0312505	0.980114	7.05902e-06	0.086394
CONCANNON_APOPTOSIS_BY_EPOXOMICIN_DN	0.104864	0.112592	0.0897133	0.103659	0.107185	0.119254	0.0938695	-0.068621	0.99322	0.168641	0.0503852
CONCANNON_APOPTOSIS_BY_EPOXOMICIN_UP	0.0899927	0.0512341	0.724498	0.0890072	0.0258445	0.511864	0.08483	-0.0406469	0.712287	0.849857	0.0121439
CONRAD_STEM_CELL	0.0689781	0.098732	0.191556	0.0736592	0.217763	0.000276349	0.068849	0.0845063	0.994379	0.00312588	0.133667
CORRE_MULTIPLE_MYELOMA_DN	0.0363845	0.0923685	0.129644	0.0344364	0.0189131	0.628121	0.0377441	0.216334	0.632471	0.430827	0.109205
CORRE_MULTIPLE_MYELOMA_UP	0.0204483	0.0382188	0.901122	0.0222587	0.163247	0.341418	0.0205455	-0.0989098	0.976387	0.87891	0.0341852
COULOUARN_TEMPORAL_TGFB1_SIGNATURE_DN	0.032871	-0.220959	0.00083301	0.0340493	-0.19395	0.00300224	0.0345422	-0.0636064	0.915311	0.000225071	-0.159505
COULOUARN_TEMPORAL_TGFB1_SIGNATURE_UP	0.0745653	-0.114686	0.0231952	0.0730156	-0.211798	0.000675332	0.0766824	-0.0840126	0.898888	0.00104989	-0.136832
COWLING_MYCN_TARGETS	0.0336527	-0.219483	0.0029258	0.0397664	-0.0033066	0.874466	0.0366639	-0.0707653	0.975853	0.0622921	-0.0978518
CREIGHTON_AKT1_SIGNALING_VIA_MTOR_DN	0.242035	-0.0152169	0.949642	0.240118	0.0428111	0.309296	0.250708	0.141124	0.374548	0.620793	0.0562394
CREIGHTON_AKT1_SIGNALING_VIA_MTOR_UP	0.151834	0.0414935	0.252627	0.147456	0.0632104	0.0141836	0.142451	0.0140361	0.954774	0.0779892	0.03958
CREIGHTON_ENDOCRINE_THERAPY_RESISTANCE_1	0.0915808	-0.00349802	0.891381	0.0900208	-0.0171773	0.287886	0.0926831	0.00728546	0.97336	0.836588	-0.00446328
CREIGHTON_ENDOCRINE_THERAPY_RESISTANCE_2	0.0247225	0.026628	0.215819	0.0267747	0.14656	4.61591e-05	0.0246671	-0.00840109	0.980114	0.000772187	0.0549289
CREIGHTON_ENDOCRINE_THERAPY_RESISTANCE_3	0.0505568	-0.00893745	0.392883	0.0525797	0.0229871	0.384502	0.0525922	0.0310823	0.976387	0.699954	0.015044
CREIGHTON_ENDOCRINE_THERAPY_RESISTANCE_4	0.0756143	-0.00463251	0.485009	0.0756128	0.0143059	0.288288	0.0733385	-0.0643383	0.348817	0.418593	-0.0182216
CREIGHTON_ENDOCRINE_THERAPY_RESISTANCE_5	0.0550747	-0.0890385	0.228893	0.0591439	0.000331417	0.579074	0.0603708	0.0773324	0.730427	0.586792	-0.00379157
CROMER_METASTASIS_DN	0.112865	0.0400987	0.137184	0.108025	-0.00341829	0.539661	0.107901	-0.0013948	0.999848	0.517577	0.0117619
CROMER_METASTASIS_UP	0.0716113	-0.24113	8.41536e-07	0.0773395	-0.130685	0.000254335	0.0896432	0.093242	0.927005	5.41446e-08	-0.0928575
CROMER_TUMORIGENESIS_DN	0.0294667	-0.075563	0.33495	0.0300579	-0.0805691	0.594041	0.0273619	-0.239569	0.435884	0.558007	-0.1319
CROMER_TUMORIGENESIS_UP	0.0643917	0.04002	0.847229	0.0686895	0.0898172	0.0719482	0.0629945	-0.0612846	0.915848	0.449326	0.0228509
CROONQUIST_IL6_DEPRIVATION_DN	0.136391	0.576527	0.0218351	0.0952721	0.228233	0.575053	0.115845	0.146658	0.996414	0.187397	0.317139
CROONQUIST_NRAS_SIGNALING_DN	0.136162	0.634728	0.0199018	0.0942955	0.293269	0.714684	0.117717	0.179986	0.997599	0.203034	0.369327
CROONQUIST_NRAS_SIGNALING_UP	0.0348775	-0.100147	0.253973	0.0400692	0.097483	0.514315	0.0351438	-0.110424	0.864328	0.627745	-0.0376961
CROONQUIST_NRAS_VS_STROMAL_STIMULATION_DN	0.157677	0.175827	0.0011698	0.148949	0.131644	0.164555	0.138483	-0.0229617	0.994379	0.00884472	0.0948362
CROONQUIST_NRAS_VS_STROMAL_STIMULATION_UP	0.0192101	-0.494765	0.000727106	0.0238298	-0.296252	0.0611251	0.0272921	-0.103537	0.952096	0.00261409	-0.298185
CROONQUIST_STROMAL_STIMULATION_UP	0.173784	0.0706526	0.881498	0.160437	-0.0437983	0.592114	0.1602	0.00371599	0.995117	0.971094	0.0101901
CUI_GLUCOSE_DEPRIVATION	0.141704	0.0916072	0.00946791	0.136981	0.0974268	0.000966904	0.118341	-0.133903	0.435884	0.00036194	0.0183771
CUI_TCF21_TARGETS_2_DN	0.043029	-0.198832	0.000646025	0.0476924	-0.134958	0.0314642	0.048078	-0.0598262	0.980114	0.00140253	-0.131205
CUI_TCF21_TARGETS_2_UP	0.104336	0.114764	0.0163497	0.096722	0.0855259	0.102334	0.0976898	0.0338827	0.999848	0.0465558	0.0780575
CUI_TCF21_TARGETS_DN	0.0372737	-0.119435	0.11116	0.038383	-0.1428	0.0287693	0.0387158	-0.0262167	0.96149	0.0723041	-0.0961508
CUI_TCF21_TARGETS_UP	0.0354037	0.0737695	0.681723	0.028775	-0.0797618	0.836343	0.039041	0.0970383	0.997599	0.980269	0.0303487
DACOSTA_ERCC3_ALLELE_XPCS_VS_TTD_DN	0.0471117	0.152809	0.00178985	0.0450779	0.04016	0.485435	0.0435606	0.0611529	0.927005	0.0269826	0.0847073
DACOSTA_ERCC3_ALLELE_XPCS_VS_TTD_UP	0.040295	0.0331179	0.143163	0.0404277	0.0217429	0.395461	0.0400885	0.0127959	0.994374	0.451276	0.0225522
DACOSTA_UV_RESPONSE_VIA_ERCC3_COMMON_DN	0.0570753	-0.0344604	0.874221	0.0589701	-0.110443	0.103841	0.0662697	0.0430452	0.994374	0.568414	-0.0339526
DACOSTA_UV_RESPONSE_VIA_ERCC3_COMMON_UP	0.0708126	-0.00188534	0.681463	0.073087	0.0739465	0.254994	0.0750142	0.0667432	0.870808	0.706862	0.0462681
DACOSTA_UV_RESPONSE_VIA_ERCC3_DN	0.0688599	-0.0241407	0.774946	0.0721951	-0.0652682	0.288288	0.0787831	0.0312186	0.976387	0.80314	-0.0193968
DACOSTA_UV_RESPONSE_VIA_ERCC3_TTD_DN	0.0536377	0.121588	0.0310817	0.0520677	0.0076826	0.948304	0.0536198	0.0443566	0.976194	0.312004	0.0578758
DACOSTA_UV_RESPONSE_VIA_ERCC3_TTD_UP	0.115205	-0.0750824	0.165157	0.116852	-0.056692	0.0278256	0.13221	0.121627	0.694866	0.0742732	-0.00338256
DACOSTA_UV_RESPONSE_VIA_ERCC3_UP	0.110647	0.0184387	0.984064	0.107753	0.0126401	0.753375	0.10672	0.00543111	0.9518	0.994549	0.01217
DACOSTA_UV_RESPONSE_VIA_ERCC3_XPCS_DN	0.0362877	0.0630668	0.605797	0.0373359	0.0133317	0.780904	0.038045	0.000676701	0.999848	0.959672	0.0256917
DACOSTA_UV_RESPONSE_VIA_ERCC3_XPCS_UP	0.0565328	0.00822989	0.748061	0.0542818	-0.103859	0.0646732	0.0623533	0.0858361	0.9518	0.405927	-0.00326449
DAIRKEE_CANCER_PRONE_RESPONSE_BPA	0.16867	0.0688839	0.0193386	0.157176	0.0125838	0.757938	0.14835	-0.106258	0.864328	0.188905	-0.00826341
DAIRKEE_CANCER_PRONE_RESPONSE_BPA_E2	0.233131	0.0395205	0.00869608	0.223871	0.0302166	0.295987	0.22237	-0.00995677	0.994695	0.0634282	0.0199268
DAIRKEE_CANCER_PRONE_RESPONSE_E2	0.0796034	0.0933149	0.196755	0.0777904	0.168087	0.0171103	0.0635127	-0.193047	0.784571	0.0648632	0.022785
DANG_BOUND_BY_MYC	0.218763	0.0384225	1.39779e-05	0.212358	0.0243795	0.00395625	0.20443	-0.0322065	0.93168	8.1707e-06	0.0101985
DANG_MYC_TARGETS_DN	0.122313	-0.142515	0.0029729	0.123708	-0.156409	0.00260256	0.135722	0.0384673	0.976387	0.000621998	-0.0868191
DANG_MYC_TARGETS_UP	0.373122	0.0659543	0.000253337	0.358022	0.040853	0.087713	0.351761	0.00238224	0.994598	0.0015289	0.0363965
DANG_REGULATED_BY_MYC_DN	0.124824	-0.0455821	0.0132336	0.126191	-0.027368	0.49476	0.128191	0.00990051	0.999848	0.122245	-0.0210165
DANG_REGULATED_BY_MYC_UP	0.187668	0.115988	0.00152267	0.170949	0.0425717	0.160114	0.17206	0.00433391	0.994818	0.0106648	0.0542978
DARWICHE_PAPILLOMA_PROGRESSION_RISK	0.0244053	-0.0584954	0.4118	0.0214767	-0.305859	0.00010224	0.0224417	-0.164786	0.517333	0.00151049	-0.17638
DARWICHE_PAPILLOMA_RISK_HIGH_DN	0.058105	-0.00366706	0.913437	0.0592142	0.0270498	0.25095	0.0579433	-0.0463104	0.861193	0.777533	-0.00764255
DARWICHE_PAPILLOMA_RISK_HIGH_UP	0.191043	0.0066243	0.533009	0.187894	0.00941151	0.548623	0.186543	0.00600854	0.997025	0.872355	0.00734812
DARWICHE_PAPILLOMA_RISK_LOW_DN	0.0564608	0.0517197	0.0812901	0.0554225	0.0152232	0.67679	0.055528	-0.0250359	0.976387	0.440426	0.013969
DARWICHE_PAPILLOMA_RISK_LOW_UP	0.183084	-0.0140398	0.389526	0.18224	0.00916878	0.28153	0.179039	-0.0150964	0.9518	0.606741	-0.00665579
DARWICHE_SKIN_TUMOR_PROMOTER_DN	0.0890349	0.0236834	0.178689	0.0887685	0.036571	0.00927168	0.0870252	-0.0256009	0.920374	0.0434868	0.0115512
DARWICHE_SKIN_TUMOR_PROMOTER_UP	0.153886	-0.00832631	0.597141	0.152471	-0.00117518	0.605536	0.151759	0.00449976	0.999848	0.916471	-0.00166724
DARWICHE_SQUAMOUS_CELL_CARCINOMA_DN	0.0526732	0.00324388	0.543808	0.0548452	0.0728875	0.00976502	0.0537048	-0.0180649	0.990725	0.105301	0.0193555
DARWICHE_SQUAMOUS_CELL_CARCINOMA_UP	0.192744	-0.00336624	0.931142	0.18933	-0.00446685	0.6819	0.188725	-0.0030469	0.987981	0.988038	-0.00362666
DASU_IL6_SIGNALING_SCAR_UP	0.0592882	-0.0284903	0.427893	0.053435	-0.196949	0.0200659	0.0553388	-0.0733224	0.976387	0.144301	-0.0995871
DASU_IL6_SIGNALING_UP	0.0744319	-0.207752	0.000176103	0.077049	-0.176677	0.00106042	0.0780494	-0.0374747	0.983315	2.51196e-05	-0.140635
DAUER_STAT3_TARGETS_DN	0.057692	0.0183418	0.695149	0.0529904	-0.0646715	0.267821	0.0596785	0.0261459	0.950431	0.748778	-0.00672792
DAUER_STAT3_TARGETS_UP	0.0610451	0.0910856	0.868599	0.0581005	-0.0254405	0.301889	0.0602286	0.039228	0.990749	0.845952	0.0349577
DAVICIONI_MOLECULAR_ARMS_VS_ERMS_DN	0.0566054	-0.054014	0.157453	0.0584869	0.00801233	0.982949	0.0570373	-0.00788125	0.997025	0.712135	-0.017961
DAVICIONI_MOLECULAR_ARMS_VS_ERMS_UP	0.0450769	-0.0708573	0.00193621	0.0465686	-0.0441119	0.0554009	0.048222	-0.0181081	0.994379	0.00554325	-0.0443591
DAVICIONI_PAX_FOXO1_SIGNATURE_IN_ARMS_UP	0.0529126	-0.078152	0.0290214	0.0493425	-0.160762	0.000248833	0.0524218	-0.0327854	0.915311	0.000555581	-0.0905665
DAVICIONI_RHABDOMYOSARCOMA_PAX_FOXO1_FUSION_UP	0.0552613	-0.0438382	0.314453	0.0562244	-0.00799273	0.692295	0.0509273	-0.128999	0.546247	0.641713	-0.0602766
DAVICIONI_TARGETS_OF_PAX_FOXO1_FUSIONS_DN	0.0383499	0.0768409	0.552572	0.0371205	0.00746174	0.91854	0.0366572	-0.010175	0.976387	0.96561	0.0247092
DAVICIONI_TARGETS_OF_PAX_FOXO1_FUSIONS_UP	0.0792581	-0.0754396	0.00508354	0.0790075	-0.0988468	0.0224616	0.0760366	-0.0980179	0.9518	0.00562739	-0.0907681
DAVIES_MULTIPLE_MYELOMA_VS_MGUS_DN	0.0716146	-0.363433	0.00130984	0.0828376	-0.153906	0.129454	0.0917773	0.059336	0.994379	0.00799685	-0.152668
DAWSON_METHYLATED_IN_LYMPHOMA_TCL1	0.0208231	-0.0411333	0.454285	0.0217082	0.00912523	0.992034	0.0216261	-0.0396271	0.864328	0.929908	-0.0238784
DAZARD_RESPONSE_TO_UV_NHEK_DN	0.0427988	-0.0051459	0.628579	0.0431672	-0.123834	0.0995301	0.0493577	0.0322146	0.997025	0.475538	-0.0322551
DAZARD_RESPONSE_TO_UV_NHEK_UP	0.24143	0.0107067	0.942138	0.237873	-0.00722635	0.277371	0.235871	0.00497882	0.982172	0.843081	0.00281973
DAZARD_RESPONSE_TO_UV_SCC_DN	0.0486289	-0.0928597	0.205728	0.0509991	-0.127314	0.12071	0.0547548	-0.0355581	0.984031	0.283465	-0.085244
DAZARD_RESPONSE_TO_UV_SCC_UP	0.201182	-0.00188178	0.874278	0.195722	0.0035339	0.872816	0.19288	-0.0161982	0.96503	0.996198	-0.00484869
DAZARD_UV_RESPONSE_CLUSTER_G1	0.353659	-0.0186528	0.106628	0.357168	-0.0145365	0.0915302	0.349731	-0.0211673	0.811912	0.13899	-0.0181189
DAZARD_UV_RESPONSE_CLUSTER_G6	0.04695	0.0561602	0.415772	0.0470065	-0.0142204	0.601256	0.0512133	0.0443468	0.994379	0.83543	0.0287622
DE_YY1_TARGETS_DN	0.12518	-0.0425324	0.259699	0.122858	-0.0789224	0.026588	0.125055	-0.0170866	0.940494	0.12158	-0.0461805
DEBIASI_APOPTOSIS_BY_REOVIRUS_INFECTION_DN	0.0520842	-0.0390552	0.355415	0.055783	0.0190833	0.366872	0.0556051	0.0185805	0.940494	0.65002	-0.000463766
DEBIASI_APOPTOSIS_BY_REOVIRUS_INFECTION_UP	0.0733891	-0.0751152	0.126616	0.0791115	-0.0126154	0.534838	0.0805432	5.19459e-05	0.997025	0.49476	-0.0292262
DELACROIX_RAR_BOUND_ES	0.0618582	-0.0788534	0.000566461	0.0624163	-0.0747184	4.61591e-05	0.0626177	-0.0244938	0.928848	4.18322e-06	-0.0593552
DELACROIX_RAR_TARGETS_DN	0.116589	0.207605	0.00840305	0.0968377	0.0988907	0.172739	0.0961137	-0.135941	0.870808	0.0378458	0.0568515
DELACROIX_RAR_TARGETS_UP	0.109391	-0.114895	0.0824657	0.106108	-0.152286	0.000656984	0.113404	0.0305986	0.994379	0.00318569	-0.0788609
DELACROIX_RARG_BOUND_MEF	0.105279	-0.0314281	0.0192861	0.103881	-0.0579586	0.00269606	0.101237	-0.0578931	0.525852	0.00182392	-0.0490933
DELASERNA_MYOD_TARGETS_DN	0.061737	-0.186898	3.36585e-06	0.0576021	-0.299068	3.07426e-10	0.0645646	-0.0359052	0.967275	6.32531e-13	-0.173957
DELASERNA_MYOD_TARGETS_UP	0.0441427	-0.0716865	0.118866	0.0471224	0.0345486	0.709837	0.0472817	-0.0173359	0.973827	0.544069	-0.0181579
DELPUECH_FOXO3_TARGETS_DN	0.114086	0.158363	0.266569	0.116374	0.244283	0.31137	0.120218	0.076261	0.999848	0.546626	0.159636
DELPUECH_FOXO3_TARGETS_UP	0.057457	-0.283782	0.000314824	0.0686167	-0.0618794	0.173454	0.0676265	-0.0398786	0.949361	0.00308716	-0.128513
DELYS_THYROID_CANCER_DN	0.0438425	0.0917426	0.104828	0.0452676	0.123391	0.000839152	0.0420391	0.0636777	0.870808	0.00424241	0.0929373
DELYS_THYROID_CANCER_UP	0.0660808	-0.122406	5.45586e-06	0.0693599	-0.0786299	0.0128416	0.07087	-0.00559381	0.9518	1.02717e-05	-0.0688767
DEMAGALHAES_AGING_UP	0.181275	-0.126527	3.45673e-07	0.189352	-0.0747593	0.000364377	0.197801	0.0125315	0.985203	3.52368e-08	-0.0629182
DEN_INTERACT_WITH_LCA5	0.446345	0.0188317	0.0933772	0.431633	0.000914104	0.40108	0.436216	0.00372717	0.994379	0.361371	0.00782431
DER_IFN_ALPHA_RESPONSE_UP	0.117877	-0.0166441	0.263487	0.118718	0.00291462	0.776328	0.122608	0.04392	0.74218	0.707743	0.0100635
DER_IFN_BETA_RESPONSE_UP	0.141279	-0.0316455	0.46763	0.143589	0.00347152	0.837081	0.147061	0.0202643	0.861193	0.902951	-0.00263658
DER_IFN_GAMMA_RESPONSE_UP	0.134877	-0.0256524	0.485739	0.137536	0.020843	0.479599	0.14312	0.0579379	0.702818	0.728064	0.0177095
DESERT_PERIPORTAL_HEPATOCELLULAR_CARCINOMA_SUBCLASS_UP	0.0103541	-0.141053	0.51546	0.0108761	-0.114745	0.770531	0.00940159	-0.124613	0.940494	0.922487	-0.126804
DESERT_PERIVENOUS_HEPATOCELLULAR_CARCINOMA_SUBCLASS_UP	0.0585787	0.0249282	0.835579	0.0585096	0.0126229	0.610827	0.0591096	0.0269449	0.994374	0.968455	0.0214987
DESERT_STEM_CELL_HEPATOCELLULAR_CARCINOMA_SUBCLASS_UP	0.160496	0.0490446	0.0941376	0.157502	0.0154573	0.989108	0.158172	0.00694035	0.999848	0.57649	0.0238141
DEURIG_T_CELL_PROLYMPHOCYTIC_LEUKEMIA_DN	0.057039	-0.0450817	0.0386084	0.0584901	-0.0298973	0.525465	0.0623028	0.0690121	0.367904	0.133538	-0.00198897
DEURIG_T_CELL_PROLYMPHOCYTIC_LEUKEMIA_UP	0.0746243	-0.00964126	0.888993	0.0743637	-0.0101493	0.667879	0.076102	0.0167582	0.985203	0.982716	-0.00101079
DIAZ_CHRONIC_MEYLOGENOUS_LEUKEMIA_DN	0.128106	-0.0342703	0.0651129	0.131815	-0.0182012	0.585965	0.133442	0.0201015	0.960389	0.358114	-0.01079
DIAZ_CHRONIC_MEYLOGENOUS_LEUKEMIA_UP	0.243826	0.0287092	0.00223977	0.235607	0.0113481	0.209173	0.233183	-0.0108961	0.996414	0.0177769	0.00972042
DING_LUNG_CANCER_EXPRESSION_BY_COPY_NUMBER	0.0745332	0.0347339	0.803265	0.0741326	0.0129065	0.393936	0.072367	-0.0275392	0.999848	0.889979	0.0067004
DING_LUNG_CANCER_MUTATED_SIGNIFICANTLY	0.0703283	-0.137084	0.00476504	0.064138	-0.292627	6.76283e-06	0.0726115	-0.0637414	0.914365	4.97022e-06	-0.164484
DIRMEIER_LMP1_RESPONSE_EARLY	0.200849	0.00558623	0.89784	0.193881	-0.0301784	0.516056	0.193546	0.0194151	0.994379	0.956112	-0.00172568
DIRMEIER_LMP1_RESPONSE_LATE_DN	0.352084	-0.0141443	0.181062	0.346327	-0.0146797	0.737392	0.358834	0.0525295	0.652707	0.559248	0.00790184
DIRMEIER_LMP1_RESPONSE_LATE_UP	0.0890642	-0.0387747	0.286742	0.0885204	-0.032454	0.319741	0.0945261	0.0152201	0.994379	0.571002	-0.0186695
DITTMER_PTHLH_TARGETS_DN	0.151281	0.0309466	0.0370332	0.155555	0.0644034	0.000814987	0.152127	0.0439343	0.783338	0.0016169	0.0464281
DITTMER_PTHLH_TARGETS_UP	0.192696	0.052437	0.0332469	0.187117	0.0407507	0.0530421	0.177679	-0.00624106	0.997025	0.0482866	0.0289822
DOANE_BREAST_CANCER_CLASSES_DN	0.116092	-0.0659395	0.40698	0.121142	0.0463159	0.20152	0.115823	-0.0736356	0.852221	0.503284	-0.0310864
DOANE_BREAST_CANCER_CLASSES_UP	0.013477	-0.325449	0.000192989	0.0143237	-0.361649	1.00648e-05	0.0137945	-0.202756	0.938697	4.07661e-07	-0.296618
DOANE_BREAST_CANCER_ESR1_DN	0.03026	-0.0264348	0.942177	0.0229963	-0.0601622	0.757857	0.0315083	0.0852472	0.999848	0.995036	-0.00044989
DOANE_BREAST_CANCER_ESR1_UP	0.0252131	-0.0636163	0.0700806	0.0261216	-0.0548261	0.119133	0.0278998	0.075877	0.915311	0.135663	-0.0141884
DOANE_RESPONSE_TO_ANDROGEN_DN	0.0712442	0.0197053	0.284482	0.0720307	0.0380767	0.0642913	0.071455	0.00216258	0.997025	0.23746	0.0199815
DOANE_RESPONSE_TO_ANDROGEN_UP	0.0480487	0.0208993	0.850497	0.0488839	0.00558634	0.682802	0.0466169	-0.101002	0.937091	0.976041	-0.0248387
DODD_NASOPHARYNGEAL_CARCINOMA_DN	0.179146	0.0852524	0.00369918	0.165793	0.00193603	0.734617	0.174352	0.0179621	0.983315	0.0654059	0.0350502
DODD_NASOPHARYNGEAL_CARCINOMA_UP	0.0415341	-0.100871	0.000623782	0.0450305	-0.031646	0.277049	0.0452886	0.0187795	0.994374	0.00811868	-0.0379124
DORN_ADENOVIRUS_INFECTION_12HR_DN	0.151947	-0.016732	0.776636	0.153479	0.0195293	0.923085	0.139084	-0.0772141	0.933786	0.992002	-0.0248056
DORN_ADENOVIRUS_INFECTION_12HR_UP	0.0930678	0.117613	0.0460889	0.0922714	0.196868	9.92154e-05	0.0992625	0.266211	0.0131059	9.34366e-06	0.193564
DORN_ADENOVIRUS_INFECTION_24HR_DN	0.173888	0.0944074	0.195633	0.164507	0.0493865	0.112149	0.162489	0.056208	0.783738	0.229	0.0666673
DORN_ADENOVIRUS_INFECTION_32HR_DN	0.183454	0.112786	0.225485	0.173242	0.0704252	0.121487	0.158725	-0.00799816	0.990749	0.301555	0.0584043
DORN_ADENOVIRUS_INFECTION_48HR_DN	0.176136	0.103588	0.234517	0.168206	0.0749489	0.110839	0.152314	-0.0227787	0.994374	0.293033	0.0519193
DORSAM_HOXA9_TARGETS_DN	0.157843	0.0527351	0.323917	0.150868	0.0228015	0.26162	0.15163	-0.0199552	0.973268	0.545038	0.0185271
DORSAM_HOXA9_TARGETS_UP	0.12997	-0.0661853	0.126616	0.138168	0.0599555	0.38659	0.137003	0.030935	0.984977	0.416031	0.00823507
DORSEY_GAB2_TARGETS	0.0754545	-0.122017	0.00835852	0.0682129	-0.255518	0.0412343	0.0711247	-0.0529442	0.864328	0.0125343	-0.143493
DOUGLAS_BMI1_TARGETS_DN	0.0217621	-0.205404	0.000912226	0.0263659	-0.0774314	0.242473	0.0280194	0.0549508	0.976387	0.00973156	-0.0759616
DOUGLAS_BMI1_TARGETS_UP	0.054687	-0.0379964	0.170876	0.0564492	-0.0286179	0.202756	0.0559958	-0.0537357	0.579584	0.251894	-0.0401166
DUAN_PRDM5_TARGETS	0.0155014	-0.069489	0.524495	0.0178798	-0.0134385	0.806411	0.0169595	-0.0231966	0.951524	0.935458	-0.0353747
DUNNE_TARGETS_OF_AML1_MTG8_FUSION_UP	0.0320457	0.009963	0.662499	0.0349382	0.015848	0.932673	0.0355404	0.00275728	0.996834	0.986752	0.00952277
DURAND_STROMA_NS_UP	0.0136603	-0.0118076	0.979518	0.0146482	0.0734885	0.503936	0.013575	-0.0441768	0.996875	0.964738	0.00583471
DURAND_STROMA_S_UP	0.0118358	-0.175234	0.00781796	0.0139422	-0.0644671	0.509147	0.0139069	0.0117725	0.994379	0.0864192	-0.0759762
DURCHDEWALD_SKIN_CARCINOGENESIS_DN	0.0661118	-0.100895	0.0466868	0.0686291	-0.113242	0.0132642	0.0712879	-0.0365305	0.976387	0.0216893	-0.0835556
DURCHDEWALD_SKIN_CARCINOGENESIS_UP	0.0388385	-0.145404	0.0179945	0.035721	-0.196535	0.0013791	0.0383902	0	0.997025	0.00167905	-0.11398
DUTERTRE_ESTRADIOL_RESPONSE_24HR_DN	0.0600831	-0.0889677	0.0582885	0.0622503	-0.0987173	0.188844	0.0630826	-0.0204254	0.996414	0.172146	-0.0693701
DUTERTRE_ESTRADIOL_RESPONSE_24HR_UP	0.0483725	0.513684	0.0158395	0.0339128	0.0703835	0.676929	0.0481474	0.279574	0.983315	0.167785	0.287881
DUTERTRE_ESTRADIOL_RESPONSE_6HR_DN	0.0202297	0.0202576	0.904346	0.0231386	0.148039	0.0733858	0.0229094	0.120946	0.86924	0.456986	0.0964143
DUTERTRE_ESTRADIOL_RESPONSE_6HR_UP	0.0648668	0.133099	0.000744483	0.0599765	0.011367	0.7525	0.0618988	0.0127859	0.976776	0.0200913	0.0524173
DUTTA_APOPTOSIS_VIA_NFKB	0.105088	0.0248863	0.817092	0.0989157	-0.0546879	0.198357	0.106826	0.0340052	0.999848	0.725301	0.0014012
EBAUER_MYOGENIC_TARGETS_OF_PAX3_FOXO1_FUSION	0.0512821	-0.0764886	0.204771	0.054713	-0.0713513	0.385274	0.0519756	-0.128356	0.864328	0.497191	-0.0920654
EBAUER_TARGETS_OF_PAX3_FOXO1_FUSION_DN	0.0176936	-0.0627356	0.371296	0.0196409	-0.00137476	0.825469	0.0196222	0.0180077	0.989786	0.881039	-0.0153676
EBAUER_TARGETS_OF_PAX3_FOXO1_FUSION_UP	0.0543716	-0.0269303	0.568074	0.0534929	-0.0390068	0.395386	0.0519385	-0.0564091	0.775548	0.744613	-0.0407821
EGUCHI_CELL_CYCLE_RB1_TARGETS	0.124739	1.0705	0.00116112	0.0767116	0.561864	0.130822	0.109207	0.416171	0.976387	0.0072197	0.682845
EHLERS_ANEUPLOIDY_UP	0.0930856	0.0630435	0.841748	0.0904762	-0.032497	0.605536	0.0880292	-0.0371248	0.999848	0.968937	-0.00219278
EINAV_INTERFERON_SIGNATURE_IN_CANCER	0.0352326	-0.0855579	0.279371	0.0336249	-0.129617	0.822549	0.0407641	-0.0492956	0.886299	0.785614	-0.0881568
ELLWOOD_MYC_TARGETS_DN	0.100119	0.0222606	0.191054	0.0985126	0.103014	0.012296	0.0875445	-0.0455876	0.999848	0.0596096	0.0265624
ELVIDGE_HIF1A_AND_HIF2A_TARGETS_DN	0.0831327	-0.0802419	0.161135	0.0875626	-0.116867	0.749081	0.0918014	0.0409406	0.961268	0.635094	-0.052056
ELVIDGE_HIF1A_AND_HIF2A_TARGETS_UP	0.0433069	0.320713	0.0020808	0.0417556	0.467256	2.13231e-06	0.0319372	-0.211279	0.920374	8.448e-07	0.19223
ELVIDGE_HIF1A_TARGETS_DN	0.0906398	0.00384281	0.425547	0.0920606	-0.0597409	0.850258	0.0944545	0.00434679	0.997025	0.916063	-0.0171838
ELVIDGE_HIF1A_TARGETS_UP	0.0491687	0.262166	0.0024839	0.0474766	0.315537	6.76283e-06	0.0393008	-0.151543	0.864328	2.64117e-06	0.142053
ELVIDGE_HYPOXIA_BY_DMOG_DN	0.0607386	0.151328	0.0578229	0.0590763	0.156521	0.0014396	0.0536034	-0.116959	0.824469	0.00388036	0.0636301
ELVIDGE_HYPOXIA_BY_DMOG_UP	0.0924238	-0.0180874	0.238796	0.0906067	-0.137092	0.351743	0.096934	0.0412839	0.957298	0.53853	-0.0379652
ELVIDGE_HYPOXIA_DN	0.0851185	0.154118	0.000258249	0.0787575	0.0899783	0.00550272	0.0771178	-0.0157331	0.954774	0.000143517	0.076121
ELVIDGE_HYPOXIA_UP	0.0977943	-0.0143621	0.468385	0.0973169	-0.0899193	0.598791	0.102437	0.0435808	0.976387	0.858216	-0.0202335
ENGELMANN_CANCER_PROGENITORS_DN	0.0243443	-0.216079	0.0130723	0.0237444	-0.351609	0.00186696	0.0189986	-0.363979	0.736182	0.0012869	-0.310556
ENGELMANN_CANCER_PROGENITORS_UP	0.0397991	-0.137183	0.166272	0.040431	-0.136715	0.147161	0.0407389	-0.156472	0.55457	0.197365	-0.143457
ENK_UV_RESPONSE_EPIDERMIS_DN	0.0747078	-0.0246089	0.476919	0.0752747	-0.0525675	0.310817	0.0781501	0.0266368	0.985203	0.697273	-0.0168465
ENK_UV_RESPONSE_EPIDERMIS_UP	0.0869517	0.0188958	0.303713	0.0861438	0.0223519	0.261942	0.0845061	-0.0184544	0.951524	0.523211	0.00759779
ENK_UV_RESPONSE_KERATINOCYTE_DN	0.116694	0.0245446	0.568054	0.115777	0.00117929	0.600479	0.12	0.0342478	0.9518	0.895338	0.0199906
ENK_UV_RESPONSE_KERATINOCYTE_UP	0.237673	-0.0114875	0.491079	0.235708	0.00723095	0.826226	0.230988	0.00299232	0.996414	0.936213	-0.000421417
EPPERT_CE_HSC_LSC	0.0208017	-0.190696	0.00295939	0.0217473	-0.323045	1.61285e-05	0.0258571	0.120885	0.794762	6.22416e-06	-0.130952
EPPERT_HSC_R	0.0632731	-0.0322164	0.497256	0.0684306	0.027285	0.821085	0.0669594	0.00761085	0.976387	0.933864	0.000893149
EPPERT_LSC_R	0.0564953	-0.0600909	0.137313	0.0564761	-0.0839346	0.475299	0.0598977	0.0313592	0.994379	0.485105	-0.0375554
EPPERT_PROGENITOR	0.0921651	0.104939	0.0443005	0.0857738	0.00115959	0.640802	0.0907754	0.0192938	0.999848	0.309542	0.0417975
FAELT_B_CLL_WITH_VH_REARRANGEMENTS_DN	0.175092	0	0.557699	0.172564	0.0701492	0.000471545	0.168189	0.0199625	0.997025	0.0113395	0.0300372
FAELT_B_CLL_WITH_VH_REARRANGEMENTS_UP	0.12608	-0.0865007	0.00435211	0.127303	-0.0758496	0.0100775	0.132899	0.0674991	0.712287	0.00203626	-0.0316171
FAELT_B_CLL_WITH_VH3_21_DN	0.124583	-0.135303	0.000868638	0.1352	-0.0314055	0.511216	0.135109	0.0258956	0.967275	0.0166683	-0.0469377
FAELT_B_CLL_WITH_VH3_21_UP	0.104331	0.208889	4.52983e-06	0.101388	0.191938	5.34493e-05	0.0966801	0.0188558	0.920374	6.02085e-08	0.139894
FALVELLA_SMOKERS_WITH_LUNG_CANCER	0.112793	0.0175763	0.411246	0.108002	-0.0451767	0.758075	0.117068	0.0882178	0.928848	0.870845	0.0202058
FARDIN_HYPOXIA_11	0.128483	-0.129724	0.284351	0.14191	-0.10382	0.527948	0.155361	0.142445	0.668636	0.596352	-0.0303663
FARMER_BREAST_CANCER_APOCRINE_VS_BASAL	0.0644621	0.010526	0.921789	0.0644381	0.017995	0.618414	0.0639855	-0.00353738	0.999848	0.980455	0.00832787
FARMER_BREAST_CANCER_APOCRINE_VS_LUMINAL	0.0605805	-0.0749402	0.00894668	0.0622526	-0.0114925	0.514916	0.0630518	0.0172711	0.999848	0.0960582	-0.0230539
FARMER_BREAST_CANCER_BASAL_VS_LULMINAL	0.075658	-0.0300955	0.25731	0.0722526	-0.0575298	0.00127051	0.0780782	0.038893	0.783338	0.0111311	-0.0162441
FARMER_BREAST_CANCER_CLUSTER_1	0.0120214	0.272237	0.710886	0.005394	-0.34726	0.968144	0.00821694	-0.261509	0.994379	0.99314	-0.112177
FARMER_BREAST_CANCER_CLUSTER_2	0.0447126	0.184962	0.194107	0.0427093	0.284146	0.262484	0.0450102	0.112118	0.997025	0.42771	0.193742
FERNANDEZ_BOUND_BY_MYC	0.166522	-0.0268177	0.0811584	0.165281	-0.016905	0.0172313	0.164289	-0.0136527	0.999848	0.0407894	-0.0191251
FERRANDO_T_ALL_WITH_MLL_ENL_FUSION_DN	0.230495	0.0538476	0.27259	0.216048	0.0224827	0.817526	0.218472	0.0218179	0.990749	0.806194	0.032716
FERRANDO_T_ALL_WITH_MLL_ENL_FUSION_UP	0.135116	-0.0887039	0.00417827	0.141905	-0.0799574	0.00218625	0.142893	-0.0127406	0.997025	0.000728247	-0.0604673
FERREIRA_EWINGS_SARCOMA_UNSTABLE_VS_STABLE_DN	0.0444579	-0.190356	0.000101139	0.0469872	-0.112442	0.0408421	0.0494154	-0.020253	0.942883	0.000354544	-0.107684
FERREIRA_EWINGS_SARCOMA_UNSTABLE_VS_STABLE_UP	0.093719	0.27958	0.00592981	0.0779716	0.0956265	0.410431	0.0776889	-0.0290647	0.997025	0.0610256	0.115381
FEVR_CTNNB1_TARGETS_DN	0.163309	0.113076	0.000734737	0.148362	0.0164977	0.863444	0.15498	0.0283201	0.994379	0.0224046	0.0526311
FEVR_CTNNB1_TARGETS_UP	0.0583791	-0.0584761	0.0127866	0.0613919	-0.0351565	0.839755	0.0597559	-0.040698	0.911575	0.159832	-0.0447769
FIGUEROA_AML_METHYLATION_CLUSTER_1_DN	0.0255147	-0.130644	0.0214043	0.0266019	-0.198649	1.31523e-07	0.0289537	-0.0219428	0.994379	6.00788e-07	-0.117079
FIGUEROA_AML_METHYLATION_CLUSTER_1_UP	0.0402969	-0.0808658	0.00753728	0.0424726	-0.0444213	0.26332	0.042151	-0.00568686	0.997025	0.0526407	-0.043658
FIGUEROA_AML_METHYLATION_CLUSTER_2_UP	0.0255101	0.0150772	0.837113	0.0285766	0.070306	0.74307	0.0260405	-0.0434197	0.997025	0.987244	0.0139878
FIGUEROA_AML_METHYLATION_CLUSTER_3_DN	0.0693079	0.0565835	0.850731	0.068831	-0.0221273	0.925589	0.0682563	-0.0527812	0.962854	0.997123	-0.00610832
FIGUEROA_AML_METHYLATION_CLUSTER_3_UP	0.0510658	-0.0605523	0.243622	0.0549142	0.00805334	0.935465	0.0516117	-0.0542049	0.517333	0.639404	-0.0355679
FIGUEROA_AML_METHYLATION_CLUSTER_4_UP	0.0696306	0.0223439	0.61757	0.0712645	0.0421878	0.01728	0.0671282	-0.0473343	0.864328	0.153716	0.00573247
FIGUEROA_AML_METHYLATION_CLUSTER_5_DN	0.0248357	0.03161	0.650924	0.0200684	-0.0635295	0.676728	0.0176079	-0.334473	0.49096	0.800965	-0.122131
FIGUEROA_AML_METHYLATION_CLUSTER_6_DN	0.0113828	0.417886	0.326731	0.0112649	0.521676	0.206966	0.00845289	-0.368307	0.984977	0.491433	0.190418
FIGUEROA_AML_METHYLATION_CLUSTER_6_UP	0.0572828	-0.0171674	0.655553	0.0588094	-0.0151548	0.95138	0.0563189	-0.0565455	0.657193	0.938471	-0.0296226
FIGUEROA_AML_METHYLATION_CLUSTER_7_UP	0.052925	-0.00468968	0.776882	0.0569708	0.0198679	0.485435	0.0511193	-0.0923426	0.563434	0.79648	-0.0257214
FIRESTEIN_CTNNB1_PATHWAY	0.0273416	0.0754959	0.225106	0.0246515	-0.128628	0.61498	0.0314013	0.0203675	0.976387	0.67634	-0.0109216
FIRESTEIN_PROLIFERATION	0.0314929	0.079708	0.0499933	0.0301403	0.0112762	0.796352	0.0302747	-0.0679816	0.976387	0.370084	0.00766751
FISCHER_DIRECT_P53_TARGETS_META_ANALYSIS	0.0573283	-0.0011408	0.178689	0.0572291	-0.0421121	0.35983	0.057728	-0.0083352	0.985203	0.47925	-0.017196
FISCHER_DREAM_TARGETS	0.123456	0.233795	0.000381769	0.106132	0.0650694	0.515063	0.109004	-0.00510521	0.994379	0.00899512	0.0979196
FISCHER_G1_S_CELL_CYCLE	0.0433119	0.121841	0.0431139	0.0393629	-0.0513298	0.883581	0.0507246	0.230851	0.480559	0.238032	0.100454
FISCHER_G2_M_CELL_CYCLE	0.0649661	0.30427	0.135566	0.0555603	0.0709792	0.876516	0.0573807	-0.00283104	0.996414	0.640542	0.12414
FLECHNER_BIOPSY_KIDNEY_TRANSPLANT_OK_VS_DONOR_DN	0.106352	0.113044	0.374541	0.0879302	-0.148462	0.126764	0.0875261	-0.120294	0.975006	0.407081	-0.0519044
FLECHNER_BIOPSY_KIDNEY_TRANSPLANT_OK_VS_DONOR_UP	0.182055	-0.0201648	0.144877	0.17968	-0.0221517	0.0764901	0.183774	0.0158657	0.960389	0.168812	-0.00881692
FLECHNER_BIOPSY_KIDNEY_TRANSPLANT_REJECTED_VS_OK_DN	0.135134	0.0145131	0.444669	0.132533	0.00962418	0.970348	0.132136	0.0144945	0.867353	0.922829	0.0128773
FLECHNER_BIOPSY_KIDNEY_TRANSPLANT_REJECTED_VS_OK_UP	0.0592326	-0.0596309	0.014649	0.0621619	-0.00739267	0.599893	0.0629228	0.015815	0.994379	0.148326	-0.0170695
FLECHNER_PBL_KIDNEY_TRANSPLANT_OK_VS_DONOR_DN	0.127148	-0.0687016	0.0391968	0.132984	0.00117919	0.640293	0.132144	-0.0103129	0.933786	0.276491	-0.0259451
FLECHNER_PBL_KIDNEY_TRANSPLANT_OK_VS_DONOR_UP	0.269681	0.0251848	0.0261099	0.260487	0.000426413	0.801994	0.255393	-0.032796	0.93168	0.247502	-0.00239493
FLECHNER_PBL_KIDNEY_TRANSPLANT_REJECTED_VS_OK_DN	0.22126	0.0576858	0.0116299	0.211658	-0.00894534	0.714461	0.208333	-0.0286603	0.930223	0.136699	0.0066934
FLECHNER_PBL_KIDNEY_TRANSPLANT_REJECTED_VS_OK_UP	0.122341	-0.0355489	0.108686	0.121488	-0.0300654	0.261226	0.120029	-0.0166278	0.997025	0.309056	-0.027414
FLORIO_NEOCORTEX_BASAL_RADIAL_GLIA_DN	0.0637685	0.659634	0.0208491	0.0491333	0.351729	0.498755	0.0443597	-0.0667525	0.994379	0.16567	0.31487
FLORIO_NEOCORTEX_BASAL_RADIAL_GLIA_UP	0.0118876	-0.121164	0.0726881	0.0134514	-0.0151075	0.580029	0.0128725	-0.0815808	0.702818	0.317363	-0.0726175
FLOTHO_PEDIATRIC_ALL_THERAPY_RESPONSE_DN	0.024136	0.121841	0.153516	0.0189518	-0.0797041	0.972255	0.0223796	-0.0235478	0.994379	0.701635	0.00619651
FLOTHO_PEDIATRIC_ALL_THERAPY_RESPONSE_UP	0.477816	0.011199	0.486977	0.475028	-0.00353916	0.673226	0.473781	0.013634	0.861193	0.865174	0.00709794
FONTAINE_FOLLICULAR_THYROID_ADENOMA_DN	0.144436	0.0204386	0.326162	0.144562	0.051172	0.0242804	0.14403	0.0498139	0.897649	0.129238	0.0404748
FONTAINE_FOLLICULAR_THYROID_ADENOMA_UP	0.0675276	0.147616	0.000361876	0.0642331	0.124592	0.000243736	0.0586966	-0.0490654	0.93168	1.23588e-05	0.0743809
FONTAINE_PAPILLARY_THYROID_CARCINOMA_DN	0.0155133	-0.0187725	0.432703	0.0182264	0.144141	0.0518491	0.0200908	0.298306	0.736182	0.223341	0.141225
FONTAINE_PAPILLARY_THYROID_CARCINOMA_UP	0.118773	0.0147287	0.669797	0.116234	-0.00684692	0.914808	0.117453	0.0141158	0.990725	0.985678	0.00733252
FONTAINE_THYROID_TUMOR_UNCERTAIN_MALIGNANCY_DN	0.0708107	-0.0253282	0.900564	0.0757147	0.103173	0.00126752	0.0698138	0.00465918	0.984031	0.0346567	0.0275013
FONTAINE_THYROID_TUMOR_UNCERTAIN_MALIGNANCY_UP	0.0317048	-0.0240287	0.892773	0.033746	-0.123553	0.0837703	0.031727	-0.135668	0.778133	0.459041	-0.0944168
FORTSCHEGGER_PHF8_TARGETS_DN	0.0733416	-0.0302438	0.170875	0.0752222	-0.0143574	0.913657	0.0769979	0.011046	0.889889	0.683773	-0.0111851
FORTSCHEGGER_PHF8_TARGETS_UP	0.0508093	-0.0718117	0.0596057	0.0497003	-0.0761194	0.121741	0.0550326	-0.00173991	0.999848	0.131023	-0.0498904
FOSTER_KDM1A_TARGETS_DN	0.0459588	-0.0295583	0.964802	0.0454249	-0.0231826	0.300593	0.0494884	0.0461214	0.811912	0.822228	-0.0022065
FOSTER_KDM1A_TARGETS_UP	0.0177263	-0.284694	1.86535e-07	0.0198277	-0.186018	0.00362111	0.0230619	0.101351	0.783338	1.32534e-07	-0.123121
FOSTER_TOLERANT_MACROPHAGE_DN	0.052339	-0.000228865	0.531492	0.0522777	-0.0467131	0.278423	0.0523764	-0.0382679	0.994379	0.699313	-0.0284033
FOSTER_TOLERANT_MACROPHAGE_UP	0.0456133	-0.0991266	0.000361876	0.0470529	-0.0545713	0.0215199	0.0502949	0.0507256	0.994379	0.000635134	-0.0343241
FOURNIER_ACINAR_DEVELOPMENT_LATE_2	0.176163	0.119662	0.00130276	0.161818	0.0441689	0.25964	0.165593	0.0137937	0.994379	0.0137822	0.0592082
FOURNIER_ACINAR_DEVELOPMENT_LATE_DN	0.160167	0.091088	0.497986	0.151697	0.0198331	0.937924	0.152051	0.000319789	0.976387	0.954686	0.0370803
FRASOR_RESPONSE_TO_ESTRADIOL_DN	0.0639257	-0.0598512	0.237277	0.0631576	-0.113446	0.0113974	0.0612622	-0.166711	0.38777	0.0329192	-0.113336
FRASOR_RESPONSE_TO_ESTRADIOL_UP	0.054374	-0.0193085	0.996645	0.0544426	-0.0306138	0.498499	0.059777	0.032974	0.975006	0.962769	-0.00564942
FRASOR_RESPONSE_TO_SERM_OR_FULVESTRANT_DN	0.0973054	0.663435	0.00759939	0.0638929	0.194333	0.736066	0.0691869	0.0307325	0.997025	0.109602	0.296167
FRASOR_TAMOXIFEN_RESPONSE_UP	0.0556851	-0.0811397	0.300954	0.055051	-0.173126	0.00778316	0.0645918	0.100443	0.957298	0.0576433	-0.0512743
FRIDMAN_IMMORTALIZATION_DN	0.0635879	-0.151956	0.0432796	0.0688747	-0.0221523	0.984367	0.0684359	-0.0561599	0.997966	0.388766	-0.0767559
FRIDMAN_SENESCENCE_UP	0.110492	-0.104194	0.0116299	0.121629	-0.0302425	0.615529	0.119384	-0.0126737	0.915311	0.122318	-0.0490368
FUJII_YBX1_TARGETS_DN	0.0717026	0.142162	0.0619895	0.0637832	-0.02403	0.84215	0.0737339	0.0929859	0.975853	0.428356	0.0703727
FUJII_YBX1_TARGETS_UP	0.0612983	-0.132841	0.000131497	0.0671278	-0.010382	0.756109	0.065295	-0.0553571	0.987384	0.00518486	-0.0661933
FULCHER_INFLAMMATORY_RESPONSE_LECTIN_VS_LPS_DN	0.0527706	-0.0302444	0.291318	0.0556416	-0.0290086	0.463939	0.0557633	0.0251519	0.997025	0.675507	-0.011367
FULCHER_INFLAMMATORY_RESPONSE_LECTIN_VS_LPS_UP	0.0932251	-0.00249487	0.662499	0.0914716	-0.00833781	0.659733	0.0901132	-0.00129108	0.933786	0.937773	-0.00404125
FURUKAWA_DUSP6_TARGETS_PCI35_DN	0.0435967	0.170727	0.118388	0.0413006	0.149816	0.73744	0.0508324	0.2451	0.976387	0.553532	0.188547
FURUKAWA_DUSP6_TARGETS_PCI35_UP	0.037287	-0.254744	4.7693e-07	0.0384243	-0.289528	1.32419e-07	0.0419494	-0.0459387	0.997761	3.10868e-11	-0.196737
GABRIELY_MIR21_TARGETS	0.0404234	-0.100178	0.199755	0.0447776	-0.0775545	0.0862531	0.0476268	-0.0193586	0.981139	0.22659	-0.065697
GAJATE_RESPONSE_TO_TRABECTEDIN_UP	0.141641	-0.108004	0.00653812	0.142474	-0.0823452	0.0555837	0.142474	-0.10274	0.775548	0.0120016	-0.0976961
GAL_LEUKEMIC_STEM_CELL_DN	0.0492726	0.225341	0.0797614	0.0467161	0.135009	0.289691	0.0426397	-0.0521719	0.997025	0.273672	0.102726
GAL_LEUKEMIC_STEM_CELL_UP	0.0270139	-0.00736132	0.988934	0.0274449	-0.0306334	0.653442	0.0281589	-0.0594465	0.976387	0.988429	-0.0324804
GALE_APL_WITH_FLT3_MUTATED_UP	0.0490426	0.0834484	0.26682	0.0498178	0.0609417	0.363679	0.0459816	-0.10424	0.976387	0.581098	0.0133833
GALINDO_IMMUNE_RESPONSE_TO_ENTEROTOXIN	0.13878	-0.0871268	0.050231	0.137203	-0.106059	0.0229622	0.140952	-0.00110704	0.969226	0.0345337	-0.0647641
GALLUZZI_PERMEABILIZE_MITOCHONDRIA	0.14329	-0.0481994	0.182188	0.141568	-0.0305844	0.289685	0.145481	0.0279343	0.976387	0.430948	-0.0169498
GARCIA_TARGETS_OF_FLI1_AND_DAX1_DN	0.086014	0.107464	0.00440747	0.0802435	0.0336824	0.301435	0.0818746	0.0498912	0.999848	0.0392681	0.0636792
GARCIA_TARGETS_OF_FLI1_AND_DAX1_UP	0.0400063	-0.0350103	0.235903	0.0404977	-0.0340392	0.326583	0.0405611	-0.014026	0.999848	0.527616	-0.0276918
GARGALOVIC_RESPONSE_TO_OXIDIZED_PHOSPHOLIPIDS_BLACK_UP	0.0304036	-0.119816	0.32567	0.0370544	0.0393055	0.93019	0.0386456	0.0844745	0.933672	0.865576	0.00132135
GARGALOVIC_RESPONSE_TO_OXIDIZED_PHOSPHOLIPIDS_BLUE_DN	0.0101558	-0.217871	0.40548	0.0126824	-0.153829	0.374248	0.0128986	-0.00689353	0.951524	0.694207	-0.126198
GARGALOVIC_RESPONSE_TO_OXIDIZED_PHOSPHOLIPIDS_BLUE_UP	0.0725932	0.0268636	0.826252	0.0719442	0.00975017	0.98412	0.0694978	-0.0710163	0.93168	0.9971	-0.0114675
GARGALOVIC_RESPONSE_TO_OXIDIZED_PHOSPHOLIPIDS_GREEN_DN	0.0380935	0.0963759	0.971923	0.0382473	0.0997013	0.096256	0.0440014	0.208004	0.920374	0.556132	0.134694
GARGALOVIC_RESPONSE_TO_OXIDIZED_PHOSPHOLIPIDS_GREEN_UP	0.0209815	0.0398924	0.841469	0.0219761	-0.0501015	0.273751	0.0140603	-0.437921	0.715167	0.729716	-0.149377
GARGALOVIC_RESPONSE_TO_OXIDIZED_PHOSPHOLIPIDS_GREY_DN	0.0343931	-0.0237594	0.271373	0.0306492	-0.312939	0.000766658	0.0359583	0.0278481	0.940494	0.00900025	-0.10295
GARGALOVIC_RESPONSE_TO_OXIDIZED_PHOSPHOLIPIDS_MAGENTA_UP	0.158525	-0.0516809	0.0959093	0.164528	-0.0526984	0.170215	0.153776	-0.123269	0.478435	0.137658	-0.0758827
GARGALOVIC_RESPONSE_TO_OXIDIZED_PHOSPHOLIPIDS_PINK_DN	0.0200071	-0.0169538	0.516422	0.0223247	-0.0212389	0.950445	0.0206929	-0.16497	0.969226	0.96043	-0.067721
GARGALOVIC_RESPONSE_TO_OXIDIZED_PHOSPHOLIPIDS_RED_DN	0.0233238	-0.40549	0.000134001	0.0252931	-0.337985	6.7425e-05	0.027847	-0.0578093	0.976387	1.68956e-06	-0.267095
GARGALOVIC_RESPONSE_TO_OXIDIZED_PHOSPHOLIPIDS_TURQUOISE_DN	0.0363285	0.442005	0.0228819	0.0273935	0.118803	0.409183	0.0297972	0.0461975	0.994379	0.154663	0.202335
GARGALOVIC_RESPONSE_TO_OXIDIZED_PHOSPHOLIPIDS_TURQUOISE_UP	0.0689738	0.00968375	0.938454	0.072646	-0.0465851	0.865841	0.0634271	-0.153751	0.783348	0.989007	-0.0635509
GARGALOVIC_RESPONSE_TO_OXIDIZED_PHOSPHOLIPIDS_YELLOW_DN	0.0117696	-0.447196	0.225052	0.0208702	-0.0110723	0.466695	0.0203878	-0.126289	0.976387	0.602041	-0.194853
GARGALOVIC_RESPONSE_TO_OXIDIZED_PHOSPHOLIPIDS_YELLOW_UP	0.0271728	-0.0841351	0.525058	0.0327894	0.0438414	0.736274	0.0280951	-0.171543	0.920374	0.913458	-0.0706124
GARY_CD5_TARGETS_DN	0.153001	0.095013	6.06187e-05	0.143413	0.0521744	0.198357	0.14392	0.00118736	0.999848	0.000919693	0.0494582
GARY_CD5_TARGETS_UP	0.0877966	-0.0592735	0.0380925	0.0911481	-0.0158004	0.982009	0.0934445	0.0186694	0.976387	0.357465	-0.0188015
GAURNIER_PSMD4_TARGETS	0.0192652	-0.363942	0.00136625	0.0221666	-0.158343	0.0909379	0.0228817	-0.0266298	0.976776	0.00614897	-0.182972
GAUSSMANN_MLL_AF4_FUSION_TARGETS_A_DN	0.00945816	-0.307605	0.075166	0.0116045	-0.177636	0.334723	0.00954631	-0.417034	0.601917	0.211545	-0.300759
GAUSSMANN_MLL_AF4_FUSION_TARGETS_A_UP	0.0423099	-0.0230616	0.291318	0.043787	-0.0908095	0.00355033	0.046928	0.0255508	0.947082	0.0312768	-0.0294401
GAUSSMANN_MLL_AF4_FUSION_TARGETS_B_UP	0.011898	-0.231198	0.214393	0.0120963	-0.590583	0.0391069	0.0271388	0.428149	0.536874	0.0945349	-0.131211
GAUSSMANN_MLL_AF4_FUSION_TARGETS_C_UP	0.0833581	0.0118754	0.737932	0.0822611	-0.00162953	0.967146	0.0857289	0.0370035	0.886581	0.988617	0.0157498
GAUSSMANN_MLL_AF4_FUSION_TARGETS_D_UP	0.0404464	0.214631	0.0480532	0.0503971	0.666622	4.637e-13	0.0285321	-0.339323	0.490936	6.01482e-12	0.180643
GAUSSMANN_MLL_AF4_FUSION_TARGETS_E_UP	0.0429834	-0.111407	0.00762339	0.045492	-0.0925993	0.125803	0.0437099	-0.0815738	0.987981	0.0305044	-0.0951935
GAUSSMANN_MLL_AF4_FUSION_TARGETS_F_DN	0.00473926	-1.16832	0.00135257	0.00683944	-0.700054	0.0152693	0.0135838	0.355134	0.657193	0.00101811	-0.504412
GAUSSMANN_MLL_AF4_FUSION_TARGETS_F_UP	0.0261823	-0.152498	0.0241296	0.0289048	-0.108453	0.158391	0.0295715	0.0927899	0.915848	0.0792604	-0.0560537
GAUSSMANN_MLL_AF4_FUSION_TARGETS_G_DN	0.0352607	-0.132128	0.299896	0.0384533	-0.050565	0.35983	0.0422372	-0.0701587	0.911823	0.591072	-0.0842837
GAUSSMANN_MLL_AF4_FUSION_TARGETS_G_UP	0.0227277	-0.06914	0.045238	0.0236868	-0.0424703	0.243664	0.025579	0.0365857	0.9518	0.167248	-0.0250082
GAVIN_FOXP3_TARGETS_CLUSTER_P2	0.0187122	-0.0300271	0.488485	0.0187496	-0.0914864	0.0401659	0.0248683	0.280535	0.480559	0.155956	0.0530073
GAVIN_FOXP3_TARGETS_CLUSTER_P3	0.0389337	-0.126931	0.000944315	0.0403628	-0.117766	0.00168165	0.0388862	-0.10451	0.694866	0.000120051	-0.116402
GAVIN_FOXP3_TARGETS_CLUSTER_P4	0.0229486	-0.224208	0.00251939	0.0267622	-0.00443573	0.42313	0.0257657	-0.0294821	0.994379	0.0331865	-0.086042
GAVIN_FOXP3_TARGETS_CLUSTER_P6	0.0867805	0.461254	0.0171379	0.0702014	0.22201	0.375547	0.0668824	-0.0503355	0.994379	0.120383	0.210976
GAVIN_FOXP3_TARGETS_CLUSTER_P7	0.0512132	-0.0566717	0.392072	0.0521576	-0.0647374	0.300593	0.0485996	-0.147161	0.861193	0.599292	-0.0895234
GAVIN_FOXP3_TARGETS_CLUSTER_T4	0.117514	-0.021592	0.360323	0.116894	-0.0316588	0.26332	0.117418	0.00386422	0.97336	0.574381	-0.0164622
GAVIN_FOXP3_TARGETS_CLUSTER_T7	0.257418	-0.0012347	0.507938	0.253212	0.00345713	0.776222	0.24872	-0.00425475	0.976387	0.927856	-0.000677441
GAVIN_PDE3B_TARGETS	0.00599448	-0.975477	0.00733562	0.00873914	-0.758486	0.0219377	0.0101367	0.063695	0.985203	0.00761433	-0.556756
GAZDA_DIAMOND_BLACKFAN_ANEMIA_ERYTHROID_DN	0.0762405	0.00130892	0.799795	0.07649	-0.00201591	0.337944	0.0750003	-0.0449684	0.797929	0.800262	-0.0152251
GAZDA_DIAMOND_BLACKFAN_ANEMIA_ERYTHROID_UP	0.0231341	0.00510713	0.873273	0.0268808	0.137211	0.0495169	0.0229434	-0.184699	0.984977	0.389144	-0.0141268
GAZDA_DIAMOND_BLACKFAN_ANEMIA_MYELOID_DN	0.169351	-0.0693718	0.00150118	0.185181	0.0290706	0.18013	0.179291	0.0192304	0.996414	0.0115849	-0.00702362
GAZDA_DIAMOND_BLACKFAN_ANEMIA_MYELOID_UP	0.0267944	0.0584695	0.353708	0.0231169	-0.289842	0.00427335	0.0246896	-0.112924	0.920374	0.040636	-0.114765
GAZDA_DIAMOND_BLACKFAN_ANEMIA_PROGENITOR_DN	0.132471	0.119361	0.00860187	0.120733	0.0191986	0.385274	0.120419	-0.0530649	0.911575	0.071401	0.0284981
GAZDA_DIAMOND_BLACKFAN_ANEMIA_PROGENITOR_UP	0.108772	-0.0756268	0.0773608	0.110742	-0.0290061	0.32137	0.106104	-0.0663423	0.920374	0.272565	-0.0569918
GAZIN_EPIGENETIC_SILENCING_BY_KRAS	0.0214858	-0.310121	0.266757	0.0242136	-0.36502	0.240271	0.0338452	0.094929	0.976387	0.476323	-0.193404
GEISS_RESPONSE_TO_DSRNA_UP	0.11457	-0.0880349	0.0734717	0.108234	-0.181845	0.00177005	0.109209	-0.0818649	0.92969	0.00613052	-0.117248
GENTILE_RESPONSE_CLUSTER_D3	0.0657726	-0.108969	0.162229	0.0705394	-0.0411469	0.386468	0.0686152	-0.0830751	0.980114	0.471951	-0.0777304
GENTILE_UV_HIGH_DOSE_DN	0.0874225	0.0277758	0.246478	0.0865565	-0.0150152	0.773059	0.0859928	-0.0108615	0.997025	0.767517	0.000633034
GENTILE_UV_LOW_DOSE_DN	0.0366344	-0.0908639	0.116519	0.0414203	-0.0625245	0.248832	0.0424572	0	0.997025	0.312848	-0.0511295
GENTILE_UV_LOW_DOSE_UP	0.0840641	0.0725561	0.724754	0.0772947	-0.023357	0.958527	0.0823718	0.0146249	0.973827	0.992558	0.0212747
GENTILE_UV_RESPONSE_CLUSTER_D2	0.0659636	-0.0184551	0.98208	0.0633863	-0.107589	0.274972	0.0635146	-0.0459158	0.940494	0.840577	-0.05732
GENTILE_UV_RESPONSE_CLUSTER_D4	0.0726882	0.25474	0.00235911	0.0710744	0.101216	0.0204003	0.0732349	0.124436	0.920374	0.00271398	0.160131
GENTILE_UV_RESPONSE_CLUSTER_D5	0.0903848	0.0663273	0.580163	0.0845974	0.0265619	0.910364	0.0824246	-0.0281579	0.990988	0.971943	0.0215771
GENTILE_UV_RESPONSE_CLUSTER_D6	0.057716	-0.0738178	0.526823	0.0589594	-0.0812686	0.449694	0.0637551	0.0807109	0.994379	0.822345	-0.0247918
GENTILE_UV_RESPONSE_CLUSTER_D7	0.115382	0.213912	0.000296199	0.0964768	-0.0404226	0.807992	0.102447	0.0485645	0.856982	0.00934208	0.074018
GENTILE_UV_RESPONSE_CLUSTER_D8	0.116289	0.122776	0.0263155	0.112715	0.0819896	0.131937	0.113217	0.0537105	0.824469	0.0687087	0.0861588
GENTILE_UV_RESPONSE_CLUSTER_D9	0.103191	0.0690563	0.157654	0.102659	0.0155927	0.502299	0.104254	-0.0572944	0.988269	0.531634	0.0091182
GENTLES_LEUKEMIC_STEM_CELL_UP	0	NA	0.170876	0	NA	0.43043	0	NA	0.861193	0.47923	NA
GEORGES_CELL_CYCLE_MIR192_TARGETS	0.0824695	0.0483506	0.169301	0.0799059	-0.0171851	0.995888	0.0881034	0.0586325	0.976387	0.729524	0.0299327
GEORGES_TARGETS_OF_MIR192_AND_MIR215	0.0556867	0.0451963	0.279246	0.0566737	0.0317213	0.534425	0.0585285	0.0435862	0.957298	0.691325	0.040168
GERHOLD_ADIPOGENESIS_DN	0.281247	0.02407	0.534536	0.265124	-0.0350093	0.261443	0.260227	-0.0386141	0.563434	0.533188	-0.0165178
GERHOLD_ADIPOGENESIS_UP	0.153939	-0.0533696	0.0125177	0.157664	-0.0393441	0.0730633	0.155302	0.0112339	0.987981	0.0294328	-0.0271599
GERY_CEBP_TARGETS	0.0530136	-0.115906	0.0767523	0.0547853	-0.0917875	0.256499	0.0546026	-0.0266691	0.976387	0.245267	-0.0781208
GESERICK_TERT_TARGETS_DN	0.159426	-0.0701867	0.791383	0.167761	-0.0131179	0.66139	0.16404	0.103115	0.891184	0.957805	0.00660359
GHANDHI_BYSTANDER_IRRADIATION_UP	0.0192075	-0.143143	0.0669833	0.0181731	-0.267494	0.00672148	0.0217664	0.0174254	0.999848	0.0172845	-0.13107
GHANDHI_DIRECT_IRRADIATION_DN	0	NA	0.035631	0.000332801	Inf	0.891379	0.00479233	3.94753	0.976387	0.325791	NA
GHANDHI_DIRECT_IRRADIATION_UP	0.0289351	0.0474615	0.836746	0.0293649	0.0461076	0.266914	0.0315059	0.0789126	0.864328	0.771702	0.0574939
GILDEA_METASTASIS	0.104032	-0.280204	2.87244e-06	0.119581	-0.0585687	0.219369	0.12534	-0.00407692	0.997025	7.36586e-05	-0.114283
GINESTIER_BREAST_CANCER_20Q13_AMPLIFICATION_DN	0.0622655	0.069858	0.020061	0.0606009	0.036519	0.84715	0.0605169	-0.0354022	0.980114	0.22452	0.0236583
GINESTIER_BREAST_CANCER_20Q13_AMPLIFICATION_UP	0.0844665	-0.0875076	0.0051217	0.0861728	-0.114101	7.80472e-06	0.0870555	-0.0040513	0.999848	6.52005e-06	-0.0685532
GINESTIER_BREAST_CANCER_ZNF217_AMPLIFIED_DN	0.0568065	0.0671396	0.00868303	0.0554118	0.0192845	0.398113	0.0564439	-0.0186175	0.997511	0.0784256	0.0226022
GINESTIER_BREAST_CANCER_ZNF217_AMPLIFIED_UP	0.0443854	-0.189634	0.00274124	0.0500156	-0.0858166	0.0530421	0.0557919	0.121737	0.933672	0.00672688	-0.051238
GNATENKO_PLATELET_SIGNATURE	0.447831	-0.0390416	0.0193549	0.442646	-0.0237998	0.055515	0.441295	-0.0219717	0.824469	0.0289965	-0.0282711
GOBERT_CORE_OLIGODENDROCYTE_DIFFERENTIATION	0.00784977	0.0297475	0.711517	0.00914026	-0.353331	0.130989	0.0132609	0.251077	0.980114	0.571517	-0.0241688
GOBERT_OLIGODENDROCYTE_DIFFERENTIATION_DN	0.0533425	-0.0764425	0.0719717	0.0554154	-0.0949895	0.0390033	0.0578306	0.0222933	0.997025	0.0676113	-0.0497129
GOBERT_OLIGODENDROCYTE_DIFFERENTIATION_UP	0.0839581	0.406116	0.0010627	0.0671679	0.173953	0.259497	0.0704859	-9.85588e-09	0.997025	0.0117706	0.193356
GOLDRATH_ANTIGEN_RESPONSE	0.142683	0.0361343	0.896869	0.138871	0.00993877	0.723597	0.140318	0.00995393	0.997025	0.990043	0.0186757
GOLDRATH_HOMEOSTATIC_PROLIFERATION	0.177584	0.0285332	0.0522475	0.172325	0.0430181	0.185646	0.171042	0.0115553	0.994379	0.158296	0.0277022
GOLDRATH_IMMUNE_MEMORY	0.0357912	0.0939365	0.40548	0.0376429	0.162791	0.0444305	0.0360875	0.174088	0.9518	0.228604	0.143605
GOTTWEIN_TARGETS_OF_KSHV_MIR_K12_11	0.0629857	-0.00564867	0.561009	0.062788	-0.0711733	0.290096	0.0617379	-0.117497	0.783338	0.660508	-0.0647729
GOTZMANN_EPITHELIAL_TO_MESENCHYMAL_TRANSITION_DN	0.154681	-0.0244895	0.258384	0.154548	-0.00060431	0.921549	0.152834	-0.00179713	0.997025	0.824245	-0.00896364
GOTZMANN_EPITHELIAL_TO_MESENCHYMAL_TRANSITION_UP	0.100636	-0.0796695	0.050231	0.0987957	-0.143436	0.000208713	0.102471	-0.0668336	0.783338	0.000667426	-0.0966463
GOZGIT_ESR1_TARGETS_DN	0.039987	-0.110844	0.0014654	0.0430962	-0.078051	0.0952614	0.0471765	0.106257	0.996414	0.00685889	-0.0275463
GOZGIT_ESR1_TARGETS_UP	0.0406866	-0.0527522	0.0277672	0.0402338	-0.0701115	0.0868457	0.0418349	-0.0380714	0.911575	0.0568197	-0.053645
GRABARCZYK_BCL11B_TARGETS_DN	0.0591827	-0.0462663	0.276968	0.062425	0.10084	0.0232077	0.0589245	0.0251302	0.997025	0.120495	0.0265679
GRABARCZYK_BCL11B_TARGETS_UP	0.0981684	-0.0697213	0.00453146	0.10517	-0.0196629	0.545614	0.102718	-0.046854	0.783338	0.0518228	-0.0454127
GRADE_COLON_AND_RECTAL_CANCER_DN	0.0143146	-0.163736	0.184433	0.0165083	0.00974416	0.820913	0.0148909	-0.0859139	0.976387	0.70056	-0.0799685
GRADE_COLON_AND_RECTAL_CANCER_UP	0.207045	0.0547834	0.00416157	0.193681	0.0146218	0.601256	0.191811	-0.0139739	0.997025	0.0622559	0.0184771
GRADE_COLON_VS_RECTAL_CANCER_DN	0.0388105	-0.182588	0.00295939	0.0350247	-0.338923	2.92879e-07	0.0354784	-0.187494	0.9518	1.98527e-07	-0.236335
GRADE_COLON_VS_RECTAL_CANCER_UP	0.0583011	0.0366584	0.978799	0.0574235	0.0100097	0.688379	0.0618326	0.0983521	0.892961	0.984994	0.0483401
GRAESSMANN_APOPTOSIS_BY_DOXORUBICIN_DN	0.165181	0.0024301	0.535406	0.161686	-0.0482524	0.00254489	0.169453	0.0197026	0.978215	0.0393668	-0.00870657
GRAESSMANN_APOPTOSIS_BY_DOXORUBICIN_UP	0.0674578	-0.077925	0.000130089	0.070542	-0.0258624	0.0650738	0.0714075	0.00223889	0.973827	0.000669577	-0.0338495
GRAESSMANN_APOPTOSIS_BY_SERUM_DEPRIVATION_DN	0.0578997	-0.0486798	0.20134	0.0609808	-0.0203006	0.923144	0.0593405	-0.0234816	0.98269	0.757173	-0.0308206
GRAESSMANN_APOPTOSIS_BY_SERUM_DEPRIVATION_UP	0.0606433	-0.0327681	0.202516	0.0603122	-0.0570146	0.000130859	0.0624283	0.00233064	0.991945	0.00176547	-0.0291507
GRAESSMANN_RESPONSE_TO_MC_AND_DOXORUBICIN_DN	0.0941429	0.0303416	0.170568	0.0894415	-0.0635194	0.00766446	0.0898232	-0.0636332	0.778133	0.0321771	-0.0322703
GRAESSMANN_RESPONSE_TO_MC_AND_DOXORUBICIN_UP	0.0399801	-0.117257	8.33197e-05	0.0416935	-0.0780011	0.0104384	0.043444	0.0153263	0.999848	9.76806e-05	-0.0599772
GRAESSMANN_RESPONSE_TO_MC_AND_SERUM_DEPRIVATION_DN	0.0690308	-0.0994466	0.02582	0.0750217	0.0104956	0.890661	0.0690947	-0.13993	0.824469	0.243215	-0.0762938
GRAESSMANN_RESPONSE_TO_MC_AND_SERUM_DEPRIVATION_UP	0.0395992	-0.0919888	0.00121105	0.0389064	-0.123502	0.000503796	0.0415838	-0.00116073	0.975006	7.02423e-05	-0.0722173
GRAHAM_CML_DIVIDING_VS_NORMAL_QUIESCENT_DN	0.0680841	0.016354	0.982715	0.0686078	-0.00341325	0.605536	0.0713796	0.0839657	0.864328	0.969991	0.0323021
GRAHAM_CML_DIVIDING_VS_NORMAL_QUIESCENT_UP	0.124722	0.312774	0.0474916	0.0969375	0.0658732	0.826869	0.100465	-0.0271635	0.994454	0.371028	0.117161
GRAHAM_CML_QUIESCENT_VS_NORMAL_DIVIDING_UP	0.0764019	-0.044255	0.30251	0.0773921	-0.0858046	0.255849	0.0792162	-0.093406	0.927005	0.509777	-0.0744885
GRAHAM_CML_QUIESCENT_VS_NORMAL_QUIESCENT_DN	0.0684763	0.120392	0.162905	0.0671769	0.0407075	0.65416	0.0682627	0.0916306	0.784571	0.54854	0.0842434
GRAHAM_CML_QUIESCENT_VS_NORMAL_QUIESCENT_UP	0.0886716	0.209439	0.241838	0.0772243	-0.00366631	0.98412	0.0863958	0.0911878	0.997966	0.824357	0.0989869
GRAHAM_NORMAL_QUIESCENT_VS_NORMAL_DIVIDING_DN	0.100586	0.577448	0.00280882	0.075549	0.38126	0.439926	0.0870576	0.237575	0.940494	0.0355492	0.398761
GRAHAM_NORMAL_QUIESCENT_VS_NORMAL_DIVIDING_UP	0.0967795	0.0271063	0.777026	0.0961607	-0.0131436	0.766482	0.103737	0.0796073	0.962854	0.981001	0.03119
GREENBAUM_E2A_TARGETS_UP	0.136152	0.0908628	0.793015	0.13028	0.0264821	0.918368	0.14547	0.091627	0.973827	0.994764	0.0696573
GREGORY_SYNTHETIC_LETHAL_WITH_IMATINIB	0.103795	-0.0681351	0.00144787	0.106125	-0.0297249	0.124286	0.10721	-0.0173689	0.997025	0.00840165	-0.0384096
GRESHOCK_CANCER_COPY_NUMBER_UP	0.0862429	0.0555334	0.0570393	0.0861588	0.0400065	0.343517	0.0894372	0.0574219	0.985203	0.245906	0.0509873
GROSS_ELK3_TARGETS_DN	0.107878	-0.0523142	0.10786	0.11501	0.00244316	0.683737	0.112938	0.0406347	0.977742	0.511022	-0.0030788
GROSS_ELK3_TARGETS_UP	0.120085	-0.0182166	0.823171	0.114417	-0.0326128	0.869255	0.127551	0.11012	0.994379	0.994898	0.0197635
GROSS_HIF1A_TARGETS_DN	0.231859	-0.0717691	0.493974	0.248876	-0.00150007	0.9885	0.241015	0.0388486	0.952991	0.957479	-0.0114735
GROSS_HYPOXIA_VIA_ELK3_AND_HIF1A_DN	0.0751155	0.142361	0.00114918	0.0675049	0.075127	0.404746	0.070448	0.0495244	0.997025	0.0176862	0.089004
GROSS_HYPOXIA_VIA_ELK3_AND_HIF1A_UP	0.135936	-0.0224901	0.448511	0.136559	-0.0669681	0.37055	0.140598	0.0401567	0.994379	0.730561	-0.0164338
GROSS_HYPOXIA_VIA_ELK3_DN	0.101261	-0.0719614	0.208616	0.105311	-0.0560566	0.208121	0.105974	-0.00402944	0.996414	0.392461	-0.0440158
GROSS_HYPOXIA_VIA_ELK3_ONLY_DN	0.0479987	-0.114653	0.0718757	0.0504456	-0.0270872	0.175567	0.0491817	-0.117706	0.793463	0.162225	-0.0864819
GROSS_HYPOXIA_VIA_ELK3_ONLY_UP	0.0584398	-0.0881716	0.0879699	0.0545572	-0.197112	0.367105	0.0589945	-0.0652385	0.996414	0.332759	-0.116841
GROSS_HYPOXIA_VIA_ELK3_UP	0.0992073	0.140832	0.0020252	0.0900867	0.0502683	0.470416	0.0975057	0.100847	0.898888	0.0282637	0.0973157
GROSS_HYPOXIA_VIA_HIF1A_DN	0.100402	-0.116218	0.0941261	0.104806	-0.0843446	0.218321	0.0989243	-0.0697998	0.976387	0.251773	-0.0901209
GROSS_HYPOXIA_VIA_HIF1A_UP	0.167176	0.117424	0.00036572	0.154383	0.0821079	0.190109	0.151736	-0.0235378	0.999848	0.003921	0.0586647
GRUETZMANN_PANCREATIC_CANCER_DN	0.128128	-0.00127742	0.683266	0.127938	-0.0079674	0.893303	0.128746	-0.0182569	0.976387	0.984243	-0.00916725
GRUETZMANN_PANCREATIC_CANCER_UP	0.16929	-0.000897092	0.670076	0.168711	0.00722246	0.891211	0.171334	0.033126	0.859826	0.9698	0.0131504
GRYDER_PAX3FOXO1_ENHANCERS_IN_TADS	0.129314	0.0282521	0.00598338	0.126977	0.00783936	0.268084	0.128062	0.00516888	0.997025	0.0450412	0.0137534
GRYDER_PAX3FOXO1_ENHANCERS_KO_DOWN	0.0830034	0.0220373	0.0463461	0.0817309	0.00524602	0.759275	0.0819314	-0.0105529	0.976387	0.345386	0.00557681
GRYDER_PAX3FOXO1_TOP_ENHANCERS	0.10772	0.0247516	0.0994555	0.107744	0.0276327	0.274383	0.106418	-0.00799396	0.975006	0.298067	0.0147968
GU_PDEF_TARGETS_DN	0.0483248	-0.34453	0.000117707	0.0373074	-0.558076	4.68854e-07	0.0604793	0.217442	0.374548	6.7848e-09	-0.228388
GU_PDEF_TARGETS_UP	0.0401418	-0.198208	0.00745402	0.0438015	-0.172936	0.0176592	0.0477531	0.0650757	0.994379	0.00653324	-0.102023
GUENTHER_GROWTH_SPHERICAL_VS_ADHERENT_DN	0.11924	-0.103662	0.0424719	0.119663	-0.111694	0.164392	0.121093	-0.0412823	0.994379	0.127197	-0.0855463
GUILLAUMOND_KLF10_TARGETS_DN	0.127088	0.0532463	0.8271	0.122456	0.040367	0.410316	0.108259	-0.118128	0.93168	0.889847	-0.00817165
GUILLAUMOND_KLF10_TARGETS_UP	0.024172	-0.353977	0.000627496	0.0246494	-0.309049	0.018501	0.0298264	-0.063776	0.996414	0.000890422	-0.242267
GUO_HEX_TARGETS_DN	0.0770932	-0.00596994	0.928917	0.0765242	0.0352623	0.410316	0.0755972	0.0278422	0.976387	0.921809	0.0190448
GUO_HEX_TARGETS_UP	0.0775927	0.00901962	0.727696	0.0767143	-0.0510549	0.807915	0.0751648	-0.067536	0.997025	0.98289	-0.0365238
GUO_TARGETS_OF_IRS1_AND_IRS2	0.0861423	-0.0575172	0.0810941	0.082248	-0.124648	0.00480307	0.0875357	0.00972315	0.994379	0.0153828	-0.0574806
GUTIERREZ_CHRONIC_LYMPHOCYTIC_LEUKEMIA_DN	0.0238406	0.0474189	0.412159	0.0222147	-0.156819	0.262119	0.0193976	-0.264076	0.594464	0.48257	-0.124492
GUTIERREZ_MULTIPLE_MYELOMA_UP	0.279098	0.00144705	0.547134	0.265883	-0.0160263	0.83799	0.254799	-0.0416777	0.715167	0.897367	-0.0187523
GYORFFY_DOXORUBICIN_RESISTANCE	0.0546445	-0.0919014	0.129765	0.0606168	0.032375	0.645452	0.0582171	0.00802251	0.940494	0.533293	-0.017168
GYORFFY_MITOXANTRONE_RESISTANCE	0.0188555	-0.0906511	0.882079	0.0249694	0.0858743	0.759827	0.0285644	0.0970671	0.927005	0.987371	0.0307634
HADDAD_B_LYMPHOCYTE_PROGENITOR	0.0484273	0.00998555	0.661104	0.0480055	-0.057964	0.580217	0.0510892	0.0307628	0.9518	0.918296	-0.00573857
HADDAD_T_LYMPHOCYTE_AND_NK_PROGENITOR_DN	0.0406755	0.0481547	0.310603	0.0398956	0.0392803	0.0512335	0.0380498	-0.00636756	0.999848	0.218196	0.0270225
HADDAD_T_LYMPHOCYTE_AND_NK_PROGENITOR_UP	0.0564958	0.0294175	0.650924	0.0564158	-0.0623274	0.535585	0.0594566	0.0153727	0.996414	0.908853	-0.00584576
HAHTOLA_MYCOSIS_FUNGOIDES_CD4_DN	0.180931	0.038392	0.0251173	0.173252	0.0191715	0.756436	0.171605	-0.0218973	0.997025	0.243081	0.0118887
HAHTOLA_MYCOSIS_FUNGOIDES_CD4_UP	0.0997928	-0.061874	0.916719	0.100357	-0.05334	0.528508	0.10035	0.0121726	0.97336	0.959275	-0.0343471
HAHTOLA_MYCOSIS_FUNGOIDES_SKIN_DN	0.15651	-0.0420651	0.381262	0.158584	-0.0686961	0.189449	0.164678	-0.0134591	0.996414	0.510552	-0.0414068
HAHTOLA_MYCOSIS_FUNGOIDES_SKIN_UP	0.174251	0.0230879	0.101559	0.171289	0.0486066	0.00379386	0.166787	0.00828183	0.997025	0.0152852	0.0266588
HAHTOLA_SEZARY_SYNDROM_DN	0.00972998	-0.737948	0.00529632	0.0133269	-0.177085	0.279399	0.017819	0.0971408	0.784571	0.0355231	-0.272631
HAHTOLA_SEZARY_SYNDROM_UP	0.124637	0.0385261	0.145961	0.118195	-0.0179112	0.963467	0.121762	-0.00956781	0.996414	0.686087	0.00368236
HALMOS_CEBPA_TARGETS_DN	0.0322641	-0.0194901	0.436883	0.026643	-0.341037	0.0664037	0.0339567	0.27713	0.915848	0.29782	-0.0277989
[truncated: 2,967 more rows]

## Sheet: Clone2323_AUCell_by_sample
geneset	median_AUCell.DV1	enrichment.DV1	adj.p.DV1	median_AUCell.DV2	enrichment.DV2	adj.p.DV2	median_AUCell.DV3	enrichment.DV3	adj.p.DV3	fisher.combined.pvalue	mean.enrichment
[truncated: 3,817 more rows]

[truncated: 5 more sheets: Clone2448_AUCell_by_sample, Clone2874_AUCell_by_sample, Clones751&1197&1240_AUCell, Data for Fig4e and 4f, Data for Fig4h]
