# Supplementary material for: Clonal transcriptomics identifies mechanisms of chemoresistance and empowers rational design of combination therapies
Source: bioRxiv preprint, doi:10.1101/2021.12.09.471927, version 2 (2022-06-10)
Supplement: Supplementary Table 11 [file 471927_file13.xlsx]

## Sheet: DTXvsVEH_D2A1
gene	avg_log2FC_Clone1028	p_val_adj_Clone1028	avg_log2FC_Clone118	p_val_adj_Clone118	avg_log2FC_Clone1240	p_val_adj_Clone1240	avg_log2FC_Clone1286	p_val_adj_Clone1286	avg_log2FC_Clone1357	p_val_adj_Clone1357	avg_log2FC_Clone1368	p_val_adj_Clone1368	avg_log2FC_Clone1439	p_val_adj_Clone1439	avg_log2FC_Clone1858	p_val_adj_Clone1858	avg_log2FC_Clone2156	p_val_adj_Clone2156	avg_log2FC_Clone2323	p_val_adj_Clone2323	avg_log2FC_Clone2448	p_val_adj_Clone2448	avg_log2FC_Clone2874	p_val_adj_Clone2874	avg_log2FC_Clone2991	p_val_adj_Clone2991	avg_log2FC_Clone301	p_val_adj_Clone301	avg_log2FC_Clone33	p_val_adj_Clone33	avg_log2FC_Clone379	p_val_adj_Clone379	avg_log2FC_Clone500	p_val_adj_Clone500	avg_log2FC_Clone546	p_val_adj_Clone546	avg_log2FC_Clone568	p_val_adj_Clone568	avg_log2FC_Clone737	p_val_adj_Clone737	avg_log2FC_Clone861	p_val_adj_Clone861	mean.logFC	fisher.combined.pvalue	sig.down.clonal	sig.up.clonal	avg_log2FC_bulk	p_val_adj_bulk	sig.down.bulk
A430005L14Rik	-0.139114	1	-0.0390163	1	-0.112111	1	-0.223185	1	-0.0866277	1	-0.064683	1	-0.0864741	1	-0.0483601	1	-0.245191	1	0.0048388	6.1781e-05	-0.15553	1	-0.251245	1	0.148646	1	-0.155521	0.363474	0.0462783	1	-0.326716	1	0.112139	1	0.0123524	1	-0.0473557	1	-0.0984194	1	-0.0501281	1	-0.0859725	0.99654	FALSE	FALSE	-0.215585	3.32924e-155	TRUE
AC160336.1	-1.21978	0.00427959	0.146706	1	0.146521	1	0.0723996	1	0.360139	1	0.644634	1.85963e-05	-0.259374	1	-0.881398	1	-0.0695169	1	0.0848763	0.120464	-0.51844	1	-0.105804	1	0.0314037	1	-0.548027	1	-0.0102268	1	-0.480162	1	-0.0532916	1	-0.368806	1	0.0604735	1	0.0484323	1	0.316537	1	-0.123938	0.6929	FALSE	FALSE	-0.300884	6.00656e-19	TRUE
Actr2	-0.0378442	1	-0.0640577	1	-0.204948	1	-0.286355	1	0.149719	1	0.0149831	1	-0.0583638	1	-0.190666	1	-0.0342051	1	-0.197269	8.88246e-30	-0.15344	1	-0.0272003	1	-0.264285	1	-0.22781	1	-0.00961743	1	0.109393	1	0.225608	1	-0.264405	1	-0.0270137	1	-0.147698	1	-0.203733	1	-0.0904385	1.66203e-11	FALSE	FALSE	-0.237848	3.30158e-132	TRUE
Actr3	-0.102884	1	-0.398018	1	-0.0321921	1	-0.0674386	1	-0.404034	1	-0.0468435	1	-0.191498	1	-0.0588997	1	-0.346823	1	-0.160798	8.84215e-13	-0.158261	1	-0.157345	1	-0.206734	1	-0.137384	1	0.171624	1	-0.0195237	1	-0.150456	1	-0.330103	1	-0.210247	1	-0.015002	1	-0.111113	1	-0.149237	0.0790918	FALSE	FALSE	-0.201553	3.68576e-78	TRUE
Akr1b3	-0.0567169	1	-0.0854461	1	-0.317845	1	-0.167076	1	0.385942	1	-0.0836044	1	-0.113419	1	-0.156682	1	-0.186165	1	-0.016522	0.0257624	-0.124927	1	-0.20142	1	-0.0861763	1	-0.0491407	1	-0.0254257	1	0.115806	1	-0.281305	1	0.138569	1	-0.0289928	1	0.108049	1	-0.218074	1	-0.0690749	1	FALSE	FALSE	-0.237432	3.04877e-113	TRUE
Alyref	-0.346332	1	-0.259325	1	-0.0494824	1	-0.2326	1	-0.433585	1	-0.435122	0.000125208	-0.180974	1	-0.241579	1	-0.225018	1	-0.142519	5.51934e-10	-0.183654	1	-0.377665	1	0.164779	1	-0.357739	1	-0.0568059	1	0.31991	1	0.0762619	1	-0.00291236	1	-0.200879	1	-0.100383	1	-0.113634	1	-0.160917	0.0314192	FALSE	FALSE	-0.289586	5.74125e-119	TRUE
Anp32b	-0.321717	1	-0.0733758	1	-0.183146	1	-0.0185859	1	0.0788458	1	-0.113705	1	-0.178762	1	-0.494765	1	-0.11669	1	0.00130232	1	-0.170377	1	-0.435216	0.653163	0.0658311	1	-0.0950647	1	-0.0132501	1	0.0134032	1	0.115696	1	-0.109155	1	-0.257658	1	0.0668164	1	-0.130727	1	-0.112871	1	FALSE	FALSE	-0.350678	2.01587e-147	TRUE
Aqp5	0.018769	1	-0.576832	1	0.202387	1	0.020146	1	0.71491	1	-0.0431086	1	-0.298954	1	-0.140146	1	-0.0667308	1	0.142745	1	-0.476978	0.0325885	0.276845	1	0.802203	1	0.405932	1	-0.185049	1	-0.0551984	1	0.273536	1	-0.277888	1	0.43001	1	0.813399	1	0.228711	1	0.105177	1	FALSE	FALSE	-0.232434	2.90731e-85	TRUE
Arf1	0.0776428	1	-0.218271	1	-0.160763	1	-0.115483	1	-0.220332	1	-0.131281	1	-0.0284302	1	-0.185835	1	-0.131855	1	-0.0981405	0.000149329	-0.281959	0.00391016	0.0234544	1	-0.0626787	1	-0.252193	1	-0.144706	1	-0.219597	1	-0.172389	1	-0.22721	1	-0.253953	1	0.0850903	1	-0.0734229	1	-0.132967	0.941199	FALSE	FALSE	-0.238076	2.82268e-122	TRUE
Arhgdia	0.0636809	1	-0.293224	1	0.124131	1	0.0415227	1	0.107284	1	-0.0909154	1	-0.053587	1	-0.105926	1	-0.0289189	1	0.00133677	1	-0.104816	1	-0.203406	1	0.0848074	1	0.0143018	1	-0.225114	1	-0.217184	1	0.0156257	1	-0.323729	1	-0.102788	1	-0.103827	1	0.0450157	1	-0.0645586	1	FALSE	FALSE	-0.231623	9.87007e-113	TRUE
Atp6v0b	-0.241108	1	-0.125143	1	0.00938951	1	-0.247427	1	0.121123	1	-0.00373633	1	-0.17581	1	-0.489491	1	-0.0626903	1	-0.0409397	0.154031	-0.246493	0.927642	-0.381213	1	-0.0957869	1	0.0764397	1	-0.0102406	1	-0.159837	1	-0.069895	1	-0.289266	1	-0.171991	1	-0.167715	1	0.0659802	1	-0.12885	1	FALSE	FALSE	-0.217183	3.26593e-93	TRUE
Calr	0.187737	1	-0.157995	1	0.11301	1	0.047791	1	-0.202368	1	0.0152267	1	-0.210156	1	-0.173891	1	-0.129346	1	-0.0142358	1	-0.0183716	1	0.0653312	1	-0.0403846	1	0.0405709	1	-0.19246	1	0.222969	1	0.427013	1	0.0382197	1	-0.216433	1	-0.00226456	1	0.114939	1	-0.00405232	1	FALSE	FALSE	-0.430212	6.87397e-167	TRUE
Camk2n1	0.165165	1	-0.030095	1	-0.126431	1	0.159644	1	-0.235918	1	0.00341678	1	-0.0258082	1	-0.0643945	1	-0.0561004	1	-0.145306	1.58009e-42	-0.00511168	1	-0.0688014	1	-0.188561	1	0.0172014	1	-0.0412411	1	-0.218399	1	-0.0648755	1	-0.211073	1	-0.222473	1	0.146666	1	-0.208159	1	-0.0676502	3.80527e-21	FALSE	FALSE	-0.234268	2.14691e-201	TRUE
Cap1	-0.178232	1	-0.144316	1	-0.271123	1	-0.134492	1	0.158978	1	-0.0973187	1	-0.0785083	1	-0.268755	1	-0.0395591	1	-0.0846052	2.31347e-13	-0.132651	1	-0.184708	1	-0.228751	1	0.0146706	1	-0.0494901	1	-0.115321	1	0.0132564	1	-0.120961	1	-0.05194	1	-0.267952	1	-0.0824159	1	-0.111628	0.049407	FALSE	FALSE	-0.322906	5.81139e-203	TRUE
Capzb	0.157572	1	0.0439241	1	0.0620968	1	-0.156928	1	0.331276	1	0.025489	1	0.0106655	1	0.243011	1	0.149595	1	0.0713207	1	0.0283154	1	-0.291475	1	0.278849	1	0.0324259	1	0.245548	1	0.115618	1	-0.020681	1	0.0683356	1	0.0928566	1	0.0692229	1	-0.0611113	1	0.0712346	1	FALSE	FALSE	-0.207014	2.94326e-95	TRUE
Cct2	-0.151761	1	-0.116886	1	-0.229531	1	-0.156755	1	-0.115575	1	-0.101262	1	-0.190012	1	-0.224616	1	-0.194914	1	-0.154264	1.78251e-16	-0.192795	1	-0.248209	1	-0.116459	1	-0.198447	1	-0.250776	1	0.180073	1	-0.291735	1	-0.117566	1	-0.129544	1	-0.199088	1	-0.232659	1	-0.163466	0.00237986	FALSE	FALSE	-0.219013	2.95774e-109	TRUE
Cdc42	-0.048904	1	-0.19124	1	-0.136654	1	-0.404929	1	0.144427	1	-0.101879	1	-0.225673	1	0.116753	1	-0.296398	1	-0.148314	3.20097e-15	-0.196526	0.464949	-0.377868	1	-0.190735	1	-0.0660136	1	-0.332985	1	-0.0747227	1	-0.128329	1	-0.162453	1	-0.142204	1	-0.116705	1	-0.290284	1	-0.160554	0.00633956	FALSE	FALSE	-0.33624	1.96082e-226	TRUE
Cdca8	-0.121805	1	-0.413454	1	-0.000973493	1	0.139611	1	0.187142	1	-0.322942	1	0.180134	1	-0.356063	1	-0.236273	1	0.083499	1	-0.0302034	1	-0.215217	1	0.105156	1	-0.186756	1	0.0459368	1	-0.0520514	1	-0.155365	1	-0.12151	1	-0.0545912	1	-0.060119	1	0.0164084	1	-0.074735	1	FALSE	FALSE	-0.224132	5.43637e-37	TRUE
Cdk2ap2	0.113241	1	0.103093	1	0.163702	1	-0.25261	1	0.559263	1	-0.192429	1	-0.117976	1	-0.164967	1	0.105074	1	0.124542	1	-0.00675802	1	-0.321001	1	0.203964	1	0.135522	1	-0.0440637	1	0.238372	1	0.0354593	1	0.0195713	1	-0.0811344	1	0.232615	1	0.108219	1	0.0457951	1	FALSE	FALSE	-0.24715	6.9318e-122	TRUE
Cmpk1	-0.399834	1	-0.561538	0.434063	-0.0752115	1	-0.551634	1	-0.0324029	1	-0.180546	1	-0.199217	1	-0.231802	1	-0.339812	1	-0.122486	1.57016e-25	-0.174411	1	-0.277303	1	0.101425	1	-0.135812	1	-0.00504142	1	-0.10874	1	-0.0617598	1	-0.245302	1	-0.0239028	1	-0.136132	1	-0.305159	1	-0.193649	7.6988e-09	FALSE	FALSE	-0.327257	2.63574e-240	TRUE
Col3a1	-0.193177	1	-0.0195439	1	-0.169806	1	0.15172	1	-0.0881298	1	0.021	1	-0.0782986	1	-0.526494	1	0.0843879	1	-0.0745979	9.22408e-38	-0.189411	0.0261874	-0.065812	1	-0.389936	1	-0.0940668	1	-0.352358	1	0.00683624	1	0.0204803	1	0.0057852	1	-0.0500991	1	-0.108894	1	-0.144821	1	-0.107392	1.21805e-18	FALSE	FALSE	-0.477705	0	TRUE
Commd7	-0.730036	1	0.046902	1	0.116119	1	-0.0835227	1	-0.19753	1	-0.00958094	1	-0.47609	0.113503	-0.427987	1	-0.148508	1	-0.0991677	0.00202482	-0.161843	1	0.0367982	1	0.151977	1	0.237005	1	-0.359966	1	-0.070568	1	-0.12729	1	0.214818	1	-0.175318	1	-0.147502	1	-0.366695	1	-0.132285	0.999826	FALSE	FALSE	-0.255294	1.24807e-87	TRUE
Crabp2	0.195006	1	-0.452444	1	-0.328308	1	-0.116498	1	0.406097	1	-0.411401	0.143528	-0.146903	1	-0.0703136	1	-0.0829396	1	0.00290445	0.460167	-0.0320615	1	-0.0922519	1	0.274283	1	-0.0867155	1	-0.450961	1	0.246285	1	0.0714429	1	0.474382	1	0.0141258	1	-0.027497	1	0.125158	1	-0.0232672	1	FALSE	FALSE	-0.219175	4.31097e-99	TRUE
Cyr61	-0.0282761	1	0.256984	1	-0.0669353	1	-0.868192	1	-0.106173	1	0.0975894	1	-0.114037	1	0.224586	1	-0.245133	1	-0.105559	1.47808e-07	-0.049224	1	-0.294424	1	-0.183838	1	-0.353782	1	-0.470737	1	-0.188165	1	-0.0246028	1	-0.395552	1	0.307632	1	-0.317993	1	0.0743356	1	-0.135785	0.882892	FALSE	FALSE	-0.215741	4.85367e-72	TRUE
Ddost	0.0742469	1	0.138453	1	0.00790564	1	-0.138232	1	0.106786	1	-0.127785	1	-0.000339809	1	-0.00762505	1	0.0539342	1	-0.0419188	1	-0.210295	1	-0.21775	1	0.140258	1	-0.0561339	1	-0.266587	1	0.108509	1	-0.0412895	1	0.107983	1	-0.280159	1	0.274603	1	-0.0324759	1	-0.0194244	1	FALSE	FALSE	-0.252887	3.52249e-109	TRUE
Dnaja1	-0.182205	1	-0.073627	1	-0.565992	1	-0.160452	1	0.427169	1	-0.0450815	1	-0.129963	1	-0.0717368	1	-0.144265	1	-0.0780659	1	-0.0487192	1	-0.30118	1	-0.206955	1	-0.165774	1	-0.057011	1	-0.249587	1	-0.363371	1	-0.542151	1	-0.319001	1	-0.202123	1	-0.26172	1	-0.178181	1	FALSE	FALSE	-0.286784	8.98019e-110	TRUE
Dqx1	-0.011639	1	-0.123966	1	0.0956051	1	-0.576992	0.652978	-0.477791	1	0.199515	1	0.046732	1	-0.743821	1	0.404265	1	-0.0526202	1.73785e-16	-0.285766	1	-0.0996747	1	0.36836	1	0.0158013	1	-0.275074	1	-0.658179	1	-0.172798	1	-0.435409	1	0.013267	1	-0.141527	1	0.293682	1	-0.124668	0.00191689	FALSE	FALSE	-0.308707	5.70567e-134	TRUE
Ebna1bp2	-0.211725	1	-0.211386	1	-0.0145331	1	-0.0149083	1	-0.102791	1	-0.208932	1	-0.157699	1	-0.0832058	1	-0.229763	1	-0.0745815	0.000221923	-0.142425	1	-0.157821	1	-0.293894	1	-0.256026	1	-0.272101	1	0.352125	1	0.0847861	1	-0.384318	1	-0.0702597	1	0.211894	1	-0.0997196	1	-0.111299	0.999816	FALSE	FALSE	-0.310451	3.03869e-142	TRUE
Eef1a1	-0.172374	1	-0.0456885	1	-0.0431171	1	-0.187951	1	-0.241901	1	-0.219173	0.196241	-0.0225819	1	-0.0797352	1	-0.134194	1	-0.149002	3.91422e-21	-0.19208	1	-0.0634625	1	-0.235449	1	-0.294152	0.00564424	-0.247405	1	-0.076393	1	-0.201497	1	-0.238872	1	-0.111402	1	-0.165269	1	-0.129931	1	-0.15484	1.15011e-07	FALSE	FALSE	-0.217163	8.55321e-158	TRUE
Eif2s1	-0.0812917	1	-0.238102	1	-0.222044	1	-0.0882135	1	-0.377066	1	-0.125505	1	-0.250805	1	-0.504294	1	-0.18453	1	-0.184756	8.09083e-22	-0.203583	1	-0.273763	1	-0.341372	1	-0.245061	1	-0.271776	1	0.211243	1	-0.108221	1	-0.186615	1	-0.29664	1	0.0374265	1	-0.0581783	1	-0.19015	2.94801e-06	FALSE	FALSE	-0.240914	3.67603e-105	TRUE
Eif3i	-0.185758	1	-0.0515068	1	0.265799	1	0.121517	1	-0.0541757	1	-0.205142	1	0.0127167	1	-0.304425	1	-0.306606	1	-0.00684331	1	-0.324067	0.000700299	-0.190615	1	-0.00712399	1	-0.162578	1	-0.298268	1	0.0711277	1	-0.0450686	1	-0.257434	1	-0.0117432	1	-0.0316117	1	-0.0876526	1	-0.0980694	0.999975	FALSE	FALSE	-0.281748	1.53621e-154	TRUE
Elob	-0.134201	1	-0.147901	1	0.016286	1	-0.0254817	1	-0.210358	1	-0.0785663	1	-0.340953	1.99208e-05	-0.0264037	1	-0.124123	1	-0.079325	0.00150394	-0.0596327	1	-0.0691332	1	-0.000130993	1	-0.201597	1	-0.0862391	1	-0.157314	1	-0.011241	1	-0.0412627	1	-0.0672205	1	-0.00505986	1	-0.166518	1	-0.0960179	0.782491	FALSE	FALSE	-0.259776	1.64469e-164	TRUE
Eloc	-0.185128	1	-0.299539	1	-0.26934	1	-0.35724	1	0.049	1	-0.169882	1	-0.177221	1	-0.177669	1	-0.216824	1	-0.206944	7.15411e-23	-0.13254	1	-0.142644	1	-0.0760519	1	-0.290412	1	-0.210859	1	-0.165972	1	-0.21136	1	0.000582087	1	-0.179031	1	-0.190343	1	-0.306753	1	-0.186484	6.70702e-07	FALSE	FALSE	-0.200094	2.84472e-86	TRUE
Faf1	-0.325089	1	-0.172774	1	-0.211429	1	-0.0525583	1	-0.0962729	1	-0.204531	0.0769782	-0.165306	1	-0.302414	1	-0.153287	1	-0.0912331	5.80905e-21	-0.170482	0.0691156	-0.228736	1	-0.191384	1	-0.250451	0.0525039	0.0469694	1	0.120894	1	-0.127037	1	-0.219304	1	-0.198507	1	-0.356015	1	-0.203875	1	-0.169182	6.12297e-08	FALSE	FALSE	-0.211777	3.18623e-182	TRUE
Gjb3	-0.0704492	1	-0.335899	1	0.210738	1	-0.416584	1	-0.0193413	1	0.0211121	1	-0.214162	1	-0.330472	1	-0.254907	1	-0.0547671	4.76327e-11	-0.240549	0.39752	-0.316726	1	0.018096	1	-0.121853	1	0.043987	1	-0.110065	1	-0.0560264	1	-0.153079	1	-0.404714	0.00145713	-0.372369	1	-0.153493	1	-0.158644	0.0218949	FALSE	FALSE	-0.216034	2.55274e-135	TRUE
Glo1	-0.591727	0.361442	-0.590226	1	-0.0254787	1	-0.197105	1	-0.0999065	1	-0.128344	1	-0.383656	0.00487306	-0.189942	1	0.113843	1	-0.0900501	3.28749e-05	-0.144333	1	-0.284884	1	0.25396	1	-0.184703	1	-0.316532	1	0.241933	1	0.0474807	1	-0.173644	1	-0.108995	1	-0.274544	1	-0.345069	1	-0.16533	0.827982	FALSE	FALSE	-0.317124	6.27235e-168	TRUE
Glrx5	-0.274876	1	-0.250919	1	-0.34062	1	-0.335247	1	-0.0169441	1	0.00341718	1	-0.337187	0.0920274	-0.153876	1	-0.104459	1	-0.0806377	0.00636219	-0.24176	1	-0.177075	1	-0.0650706	1	-0.0904563	1	-0.125605	1	-0.113738	1	0.0248968	1	-0.510421	1	-0.016257	1	-0.275971	1	-0.0968682	1	-0.170461	0.999965	FALSE	FALSE	-0.240425	3.65846e-93	TRUE
Gm11361	-0.400879	1	0.0943	1	0.086624	1	-0.215935	1	-0.29771	1	-0.340549	0.000889003	-0.304611	0.124375	-0.275394	1	0.101677	1	-0.0966101	2.63531e-07	-0.100214	1	0.044623	1	-0.217239	1	-0.303269	0.461989	-0.00903235	1	-0.278376	1	-0.280307	1	-0.155227	1	-0.0881868	1	-0.0893772	1	-0.204485	1	-0.15858	0.183879	FALSE	FALSE	-0.20374	9.90025e-87	TRUE
Gnb1	-0.0381186	1	-0.291109	1	-0.10979	1	-0.450657	1	0.0428392	1	0.0307747	1	-0.131765	1	-0.0870537	1	-0.242968	1	-0.0803351	0.00102309	-0.0668984	1	-0.0338691	1	-0.0184001	1	-0.00141195	1	-0.177499	1	-0.429926	1	0.095885	1	-0.187951	1	0.0974345	1	-0.0182802	1	-0.10928	1	-0.105161	0.999989	FALSE	FALSE	-0.28646	1.52807e-147	TRUE
Gps1	-0.238087	1	-0.319763	1	-0.0578134	1	0.122885	1	-0.00734524	1	-0.0101948	1	-0.267657	1	-0.549273	1	-0.246004	1	-0.0245461	0.447704	-0.110999	1	-0.196828	1	0.031669	1	-0.206963	1	-0.483481	0.386371	0.372672	1	0.320135	1	-0.0294573	1	-0.133085	1	-0.105766	1	-0.0324045	1	-0.103443	1	FALSE	FALSE	-0.228065	2.17787e-106	TRUE
H2afz	-0.122878	1	-0.387056	1	-0.101027	1	-0.369947	1	0.234639	1	-0.145357	1	-0.0652723	1	-0.680507	1	-0.193919	1	0.134703	1	-0.04091	1	-0.0304865	1	0.343185	1	-0.132748	1	0.122857	1	-0.358817	1	0.386692	1	-0.293909	1	-0.00902336	1	0.227731	1	-0.433747	1	-0.0912283	1	FALSE	FALSE	-0.233256	1.20936e-21	TRUE
Hnrnpa2b1	-0.0478103	1	-0.0245005	1	-0.0530791	1	-0.124518	1	0.205834	1	-0.124641	1	-0.168079	1	-0.349499	1	-0.242403	1	-0.130375	4.6453e-06	-0.0801608	1	-0.0356277	1	0.0156207	1	-0.134867	1	0.0295633	1	0.157864	1	0.31004	1	0.219282	1	-0.0823857	1	0.0954023	1	-0.173088	1	-0.0351157	0.985431	FALSE	FALSE	-0.200059	8.95952e-65	TRUE
Hsp90b1	0.192618	1	0.116548	1	0.0501157	1	0.212634	1	-0.448912	1	0.0396251	1	-0.180169	1	-0.016955	1	0.0591212	1	0.0650891	1	-0.0200439	1	0.147466	1	0.0370437	1	-0.0201166	1	-0.0481051	1	-0.161468	1	0.033756	1	0.30277	1	-0.0764556	1	0.128944	1	-0.170146	1	0.0115885	1	FALSE	FALSE	-0.230247	6.84513e-63	TRUE
Hspa4	-0.124681	1	-0.0950563	1	-0.18784	1	-0.313599	1	-0.469515	1	0.0209242	1	-0.138857	1	-0.300327	1	-0.255082	1	-0.161145	1.06677e-13	-0.183716	1	-0.298396	1	-0.337198	1	-0.0675388	1	-0.0404778	1	0.515011	1	0.0948336	1	0.0402929	1	-0.17038	1	-0.279767	1	-0.00370511	1	-0.131249	0.0370807	FALSE	FALSE	-0.228281	5.61498e-83	TRUE
Hspa4l	0.0389607	1	-0.0449113	1	-0.310437	1	-0.646539	1	-0.235448	1	-0.000777881	1	-0.150425	1	-0.402321	1	-0.253869	1	-0.0919526	4.56648e-11	-0.0674491	1	-0.48402	0.847068	-0.14755	1	-0.112544	1	-0.00560972	1	-0.203256	1	-0.250752	1	-0.329755	1	-0.0902764	1	-0.172821	1	-0.19924	1	-0.198143	0.24416	FALSE	FALSE	-0.34202	2.04811e-160	TRUE
Hspb11	-0.10711	1	-0.23339	1	-0.00575902	1	-0.00969067	1	0.00177541	1	0.0666671	1	-0.0142431	1	-0.205728	1	0.105167	1	-0.115008	3.53941e-18	-0.119627	1	0.0120377	1	0.0941166	1	-0.0551083	1	-0.305403	1	-0.0101269	1	-0.21054	1	-0.526573	1	0.144616	1	-0.10217	1	0.0325758	1	-0.0744534	0.000334802	FALSE	FALSE	-0.228438	2.45232e-125	TRUE
Ift20	0.1987	1	-0.197943	1	-0.0351087	1	0.133176	1	-0.0894824	1	-0.0467453	1	-0.113997	1	0.18853	1	-0.150521	1	-0.0315566	1.08063e-08	-0.0567891	1	0.0567942	1	0.0055642	1	-0.0353883	1	0.026586	1	0.0762847	1	0.245361	1	0.158115	1	-0.00600708	1	0.219366	1	-0.122724	1	0.0201055	0.702842	FALSE	FALSE	-0.263195	3.41668e-178	TRUE
Il11	-0.288321	1	0.0775314	1	0.37934	1	0.235792	1	0.364136	1	-0.2091	1	-0.0466	1	0.24824	1	-0.17509	1	-0.0744306	0.00584844	-0.451842	1	0.312357	1	-0.099583	1	-0.0714741	1	0.198069	1	-0.102831	1	0.494665	1	-0.0436624	1	-0.286032	1	0.0900412	1	-0.239315	1	0.0148519	1	FALSE	FALSE	-0.201316	4.06873e-50	TRUE
Isg15	0.474002	1	0.186307	1	0.0472214	1	0.0294273	1	-0.000845646	1	0.501688	1	-0.229436	1	-0.193944	1	0.175562	1	0.030359	1	-0.0906301	1	-0.308333	1	-0.502283	1	0.171254	1	-0.209429	1	0.18963	1	0.666993	1	0.314878	1	0.543118	1	0.433084	1	0.244686	1	0.117777	1	FALSE	FALSE	-0.241241	1.09012e-11	TRUE
Isyna1	0.150569	1	-0.0622845	1	0.228655	1	0.045924	1	0.0124997	1	0.011574	1	0.00762455	1	0.278976	1	-0.318692	1	0.00951894	0.167916	-0.124414	1	-0.0104124	1	0.109727	1	0.0637374	1	0.133864	1	0.203407	1	0.180846	1	0.0879815	1	0.0120012	1	0.268532	1	0.104844	1	0.0664038	1	FALSE	FALSE	-0.290626	8.07747e-129	TRUE
Itgb1	-0.0627693	1	-0.0383314	1	-0.151928	1	-0.104249	1	-0.0212203	1	0.224036	1	0.0297295	1	0.017714	1	0.132107	1	-0.332374	1.10392e-38	-0.10167	1	-0.0990583	1	-0.308723	1	0.0756612	1	0.0396315	1	-0.159568	1	0.0133575	1	-0.219659	1	-0.123033	1	-0.173957	1	-0.0512175	1	-0.0674057	3.9627e-18	FALSE	FALSE	-0.255196	3.31167e-68	TRUE
Kpna4	-0.120567	1	-0.265086	1	0.0410555	1	0.132189	1	-0.0167814	1	0.134061	1	-0.243363	1	-0.413652	1	-0.166313	1	-0.177174	2.01263e-20	-0.231562	1	-0.105661	1	-0.110387	1	-0.126107	1	-0.101957	1	-0.0440371	1	0.207562	1	-0.31524	1	-0.133124	1	-0.276743	1	-0.133351	1	-0.11744	1.95153e-05	FALSE	FALSE	-0.239609	1.18739e-103	TRUE
Manf	0.12615	1	-0.0692657	1	-0.0303433	1	-0.134033	1	-0.488636	1	-0.270268	1	-0.412095	0.113526	-0.416912	1	-0.234494	1	-0.0221193	1	-0.246369	1	-0.114756	1	-0.0223425	1	-0.203481	1	0.0532226	1	-0.250107	1	-0.0530267	1	0.143835	1	-0.208422	1	0.238271	1	-0.111888	1	-0.129861	1	FALSE	FALSE	-0.24773	1.0572e-70	TRUE
Mbnl2	-0.226201	1	-0.331265	1	-0.125731	1	0.181233	1	-0.379113	1	0.0714984	1	-0.0163965	1	-0.635295	1	-0.034529	1	-0.101832	2.32415e-05	-0.171633	1	-0.17029	1	-0.13081	1	-0.0778243	1	-0.151167	1	0.020213	1	-0.553529	1	0.0367749	1	0.0650425	1	-0.0869504	1	-0.242392	1	-0.145724	0.996662	FALSE	FALSE	-0.239293	5.61867e-97	TRUE
Minos1	-0.0660499	1	0.112264	1	0.0925013	1	-0.0977792	1	0.119763	1	0.00186059	1	-0.0498127	1	0.259212	1	-0.2272	1	0.0219278	1	-0.135069	1	-0.284883	1	-0.00952298	1	-0.0370426	1	-0.0602903	1	-0.171666	1	0.232846	1	0.030978	1	-0.284403	1	0.12158	1	-0.106293	1	-0.0255752	1	FALSE	FALSE	-0.209814	4.85551e-84	TRUE
Mllt3	-0.0577814	1	-0.152526	1	0.0892457	1	0.204104	1	0.290852	1	0.192151	1	0.10233	1	-0.146156	1	0.0466397	1	-0.00405109	0.00131374	-0.0883706	1	-0.0365437	1	0.0102563	1	0.056032	1	0.0169374	1	-0.184238	1	-0.104815	1	-0.0822321	1	0.172762	1	0.0220437	1	-0.0989962	1	0.0117925	0.999993	FALSE	FALSE	-0.23577	8.8826e-140	TRUE
Mpc1	-0.0733854	1	-0.112574	1	-0.197325	1	-0.0983051	1	0.122852	1	-0.275822	0.520098	-0.189261	1	0.35392	1	-0.179512	1	-0.0424063	2.85566e-05	-0.039432	1	0.0360814	1	-0.121835	1	-0.307613	0.283498	-0.1188	1	-0.395111	1	0.263281	1	-0.20375	1	-0.218208	1	-0.0851521	1	-0.230597	1	-0.100617	0.984255	FALSE	FALSE	-0.204754	2.03593e-105	TRUE
Mrpl20	-0.12635	1	-0.234208	1	0.191335	1	-0.098278	1	0.259383	1	0.0314002	1	-0.230601	1	-0.100252	1	-0.113044	1	0.0209085	1	-0.101791	1	-0.20841	1	0.178521	1	-0.0397075	1	-0.316697	1	0.182576	1	0.0813225	1	0.00622062	1	-0.245422	1	-0.0668401	1	-0.127096	1	-0.0503347	1	FALSE	FALSE	-0.207404	4.25775e-76	TRUE
Mrps28	-0.100812	1	-0.0214577	1	0.0399313	1	-0.293898	1	-0.0852551	1	-0.504987	2.08128e-07	-0.353146	0.000491428	-0.386836	1	-0.325851	1	-0.182103	1.74779e-26	-0.204255	1	-0.276094	1	-0.0186845	1	-0.303697	0.267617	-0.210963	1	0.0918883	1	0.115286	1	-0.244122	1	-0.243449	1	-0.203923	1	-0.35469	0.338702	-0.193672	3.1438e-17	FALSE	FALSE	-0.238845	6.25512e-148	TRUE
Mrto4	-0.446142	1	-0.282335	1	0.00176502	1	-0.382467	1	0.386858	1	-0.113957	1	-0.167576	1	-0.113199	1	-0.299997	1	-0.0419687	0.00357023	-0.215287	1	-0.103582	1	0.154564	1	-0.11414	1	-0.120632	1	0.183699	1	-0.232022	1	-0.134825	1	-0.170831	1	-0.0796165	1	-0.0185085	1	-0.11001	0.999999	FALSE	FALSE	-0.255184	2.9413e-113	TRUE
mt-Nd5	-0.559828	1	0.101624	1	0.00500875	1	0.0569123	1	-0.293699	1	0.388452	1	-0.0607188	1	-0.448385	1	-0.404447	1	-0.146746	1.63855e-07	-0.221343	1	-0.0643746	1	0.248327	1	0.219932	1	-0.206482	1	0.14806	1	-0.282135	1	0.264804	1	0.0630612	1	-0.0790623	1	-0.0999362	1	-0.0652847	0.888185	FALSE	FALSE	-0.234926	3.87135e-64	TRUE
Mtap	-0.116076	1	-0.0727559	1	-0.0569723	1	-0.0162856	1	0.20537	1	0.355723	1	-0.144112	1	-0.217775	1	-0.328451	1	0.0572954	1	-0.0998642	1	-0.127345	1	0.216117	1	0.0114164	1	-0.0676404	1	0.329499	1	0.101494	1	-0.237218	1	0.0390631	1	-0.156455	1	0.0812709	1	-0.0116049	1	FALSE	FALSE	-0.21922	4.22458e-81	TRUE
Ndufs5	-0.0674036	1	0.121579	1	0.00783371	1	-0.283317	1	0.257104	1	-0.136194	1	-0.110378	1	-0.124075	1	-0.224286	1	-0.042812	1	-0.144781	1	0.107248	1	-0.196474	1	-0.0802354	1	-0.179044	1	0.0113333	1	0.229714	1	-0.00822016	1	-0.154811	1	-0.141731	1	-0.309038	1	-0.0699042	1	FALSE	FALSE	-0.217901	1.27387e-99	TRUE
Nip7	-0.123318	1	-0.224544	1	-0.00638823	1	-0.144875	1	-0.165638	1	0.0260111	1	-0.171887	1	-0.356398	1	-0.398904	1	-0.0259985	0.000540696	-0.108355	1	-0.0888319	1	0.145918	1	-0.184014	1	-0.247134	1	-0.224111	1	-0.356531	1	-0.197183	1	-0.196048	1	-0.136491	1	-0.157965	1	-0.159175	0.99996	FALSE	FALSE	-0.206865	1.68915e-104	TRUE
Nudc	-0.512767	1	0.05812	1	-0.290238	1	-0.416914	1	0.0396761	1	-0.123391	1	-0.0937431	1	-0.307385	1	-0.0452376	1	-0.0473513	1	-0.0339506	1	-0.168209	1	0.132502	1	-0.33196	1	0.00743212	1	0.206448	1	-0.114843	1	-0.0848474	1	-0.173133	1	-0.0391804	1	0.0775907	1	-0.107685	1	FALSE	FALSE	-0.241429	7.10043e-99	TRUE
Nudt21	-0.023032	1	-0.509699	1	-0.0717123	1	-0.26604	1	-0.445516	1	-0.1688	1	-0.0839174	1	-0.0383296	1	-0.191111	1	-0.17959	2.17036e-18	-0.253138	1	-0.321017	1	-0.244769	1	-0.257632	1	0.0143333	1	-0.16137	1	-0.25671	1	-0.460489	1	0.0305177	1	-0.00876021	1	-0.255917	1	-0.197748	0.00025886	FALSE	FALSE	-0.257946	9.20714e-126	TRUE
P4hb	-0.135675	1	0.118793	1	0.0539594	1	-0.0495287	1	-0.254161	1	-0.0993993	1	-0.00612544	1	-0.0628093	1	0.0798983	1	0.00123886	1	-0.152544	1	-0.260981	1	-0.0126045	1	0.114397	1	-0.25953	1	-0.160791	1	-0.00996953	1	-0.348135	1	-0.014128	1	0.149517	1	-0.183854	1	-0.0710683	1	FALSE	FALSE	-0.358259	5.76577e-158	TRUE
Pabpc4	-0.30947	1	-0.233336	1	-0.0248219	1	-0.458246	0.552145	-0.0177853	1	-0.306946	0.00683872	-0.10743	1	-0.535736	1	-0.0970982	1	-0.13591	4.38974e-29	-0.104299	1	-0.156549	1	0.116932	1	-0.0408683	1	-0.143413	1	-0.0430591	1	-0.00024796	1	-0.593965	0.540621	-0.309928	1	-0.344451	1	-0.162092	1	-0.190891	6.17363e-13	FALSE	FALSE	-0.292533	3.74302e-230	TRUE
Pdia6	0.0238785	1	-0.0608358	1	-0.135349	1	-0.193342	1	-0.292166	1	-0.315853	0.309288	-0.327097	0.0260141	-0.470922	1	-0.246052	1	-0.178251	1.553e-10	-0.237666	1	-0.303375	1	-0.16686	1	-0.251964	1	-0.301604	1	-0.152237	1	0.163394	1	-0.059273	1	-0.239863	1	-0.0813768	1	-0.142043	1	-0.188993	0.0887909	FALSE	FALSE	-0.415352	6.3427e-211	TRUE
Pgam1	0.145639	1	0.0973333	1	-0.102159	1	-0.117647	1	-0.213387	1	-0.113392	1	0.0168752	1	-0.371976	1	-0.0389433	1	-0.0639302	0.465109	-0.0916334	1	-0.118194	1	0.0480097	1	-0.343163	0.0489347	-0.426229	1	-0.453914	1	-0.065086	1	-0.344206	1	-0.0157774	1	-0.194779	1	-0.118424	1	-0.13738	1	FALSE	FALSE	-0.299464	4.23754e-152	TRUE
Phc2	-0.340002	1	-0.358733	1	-0.0600835	1	-0.212415	1	-0.13871	1	-0.194725	1	-0.287744	0.442091	-0.0683091	1	-0.117587	1	-0.123123	1.12736e-21	-0.217514	1	-0.172915	1	0.147285	1	-0.222874	1	-0.271546	1	0.143142	1	0.071005	1	0.146699	1	-0.114484	1	-0.108649	1	-0.377097	0.52142	-0.137066	1.482e-06	FALSE	FALSE	-0.295374	1.2095e-192	TRUE
Pitpna	0.109897	1	0.00879066	1	-0.0433217	1	0.0691197	1	0.694	1	0.0300954	1	-0.0450106	1	0.0547651	1	-0.0248136	1	0.0104309	1	-0.0112844	1	-0.0212944	1	0.0746685	1	0.230272	1	0.0803832	1	0.550027	1	0.211479	1	0.0664354	1	-0.120927	1	0.152023	1	-0.209345	1	0.0888757	1	FALSE	FALSE	-0.231367	3.20111e-102	TRUE
Plat	-0.00201221	1	-0.365963	1	-0.0763624	1	-0.12379	1	0.115354	1	0.12009	1	-0.081617	1	-0.208541	1	0.0221378	1	-0.0152426	4.53603e-09	-0.052233	1	-0.0787676	1	0.0691172	1	-0.122895	1	-0.246934	1	0.0391203	1	-0.0518819	1	-0.201636	1	0.0229564	1	0.0588451	1	-0.252852	1	-0.0682433	0.628796	FALSE	FALSE	-0.261053	1.89519e-191	TRUE
Ppa1	0.0801023	1	-0.272687	1	-0.187388	1	-0.15702	1	-0.0506495	1	-0.0918291	1	-0.316354	0.033583	-0.0839916	1	-0.241351	1	-0.11776	1.19831e-06	-0.242125	1	-0.195797	1	-0.161821	1	-0.231441	1	-0.209749	1	0.0488549	1	-0.270136	1	-0.0574982	1	-0.347008	1	-0.312742	1	-0.274366	1	-0.175846	0.803516	FALSE	FALSE	-0.247052	9.04102e-100	TRUE
Ppp1r14b	0.0079203	1	-0.0732912	1	0.150187	1	-0.472065	1	0.0241555	1	-0.51105	8.67262e-10	-0.159725	1	-0.173115	1	-0.256399	1	-0.195123	1.07002e-16	-0.0774561	1	-0.176483	1	-0.210439	1	-0.297202	1	-0.244457	1	-0.0967261	1	0.148347	1	-0.289987	1	-0.298227	1	-0.236438	1	0.0195181	1	-0.162765	9.44541e-09	FALSE	FALSE	-0.201464	1.59439e-63	TRUE
Prkg2	-0.266672	1	-0.313442	1	-0.147608	1	-0.0766954	1	-0.180471	1	0.181931	1	-0.135907	1	0.276219	1	0.0235208	1	-0.154772	2.09356e-06	-0.117845	1	-0.457094	1	-0.0541205	1	0.134089	1	-0.00668015	1	0.0214992	1	-0.00171614	1	0.0886765	1	-0.140541	1	-0.542927	1	-0.267855	1	-0.101829	0.973607	FALSE	FALSE	-0.28714	1.41233e-92	TRUE
Prpf8	-0.110026	1	-0.467042	1	-0.0283244	1	-0.303827	1	0.115176	1	-0.0413243	1	-0.129579	1	-0.212909	1	0.196591	1	-0.079475	2.26664e-09	-0.0736355	1	-0.178389	1	0.0466402	1	0.0443429	1	-0.0812232	1	0.154754	1	-0.155061	1	0.0627371	1	-0.146995	1	-0.201366	1	-0.084254	1	-0.0796756	0.567534	FALSE	FALSE	-0.246268	1.86906e-127	TRUE
Psat1	-0.3589	1	-0.00539111	1	-0.137019	1	0.121332	1	-0.291817	1	-0.215159	1	-0.280917	0.120005	-0.330817	1	-0.298624	1	-0.0705425	2.84958e-09	-0.106986	1	-0.182161	1	0.181724	1	0.0119127	1	-0.392285	1	-0.128979	1	-0.0390409	1	-0.163059	1	-0.0280997	1	-0.331135	1	0.047132	1	-0.142801	0.403532	FALSE	FALSE	-0.212109	2.81262e-119	TRUE
Rab1a	-0.0815739	1	-0.198154	1	0.149213	1	-0.340232	1	0.114607	1	-0.0276182	1	-0.0146308	1	-0.210701	1	-0.183376	1	-0.0439618	2.01496e-06	-0.0655112	1	-0.222509	1	-0.137925	1	-0.151304	1	-0.179143	1	0.18854	1	-0.222688	1	0.182146	1	-0.19407	1	0.143402	1	-0.0239932	1	-0.0723563	0.972896	FALSE	FALSE	-0.307004	4.25102e-157	TRUE
Rabggtb	-0.0225747	1	0.00754025	1	-0.217983	1	-0.283811	1	-0.245652	1	-0.387761	5.65137e-06	-0.0767654	1	-0.112541	1	-0.153923	1	-0.0767302	2.32682e-14	-0.227443	1	-0.224172	1	0.145092	1	-0.260846	1	-0.393064	1	-0.081861	1	-0.0506289	1	-0.219955	1	0.0570945	1	-0.129437	1	-0.267039	1	-0.153451	5.64512e-05	FALSE	FALSE	-0.220192	1.55208e-144	TRUE
Rer1	0.145619	1	-0.360814	1	0.0432768	1	-0.286393	1	0.0616278	1	-0.221934	1	-0.213275	1	0.135077	1	-0.167023	1	-0.0721963	0.000186031	-0.162308	1	-0.243749	1	-0.109217	1	-0.0695698	1	-0.173008	1	-0.180993	1	0.0982663	1	-0.30503	1	-0.267307	1	0.142288	1	-0.100892	1	-0.109884	0.999759	FALSE	FALSE	-0.252493	6.73229e-128	TRUE
Rnaseh2c	-0.175039	1	-0.456205	1	0.0399234	1	-0.0402518	1	-0.00605009	1	-0.278209	0.438308	-0.149284	1	-0.357581	1	-0.182968	1	-0.0522349	1.40903e-05	-0.12168	1	-0.1489	1	0.172254	1	-0.289008	1	-0.0654655	1	-0.199593	1	-0.362119	1	0.0749217	1	-0.088355	1	0.325148	1	0.104415	1	-0.107442	0.988452	FALSE	FALSE	-0.229375	2.71654e-110	TRUE
Rpl11	-0.258245	1	-0.0945819	1	-0.0667553	1	-0.182981	1	-0.173525	1	-0.274024	8.92332e-06	-0.199384	0.734768	-0.10247	1	-0.181942	1	-0.0952617	1.18737e-06	-0.337257	2.81403e-08	-0.192483	1	-0.210072	1	-0.280179	0.0104942	-0.234047	0.40065	-0.118662	1	-0.290659	1	-0.229521	1	-0.0595131	1	-0.0969713	1	-0.0332827	1	-0.176753	3.18682e-06	FALSE	FALSE	-0.313088	1.51762e-272	TRUE
Rpl13a	-0.316698	1	0.168649	1	0.0833677	1	-0.160535	1	-0.156281	1	-0.250115	0.142127	0.0223837	1	-0.536645	0.67253	-0.087073	1	-0.119218	1.53637e-08	-0.169514	1	-0.134942	1	-0.402715	1	-0.108203	1	-0.20498	1	-0.133077	1	-0.316546	1	-0.187411	1	0.110554	1	0.093407	1	-0.0882545	1	-0.137802	0.529006	FALSE	FALSE	-0.256525	3.80505e-131	TRUE
Rpl22	-0.351412	1	-0.0458081	1	-0.105666	1	-0.108462	1	0.00476932	1	-0.13461	1	-0.0890713	1	-0.128708	1	-0.145765	1	-0.0700141	0.0157181	-0.259609	0.00171529	-0.2102	1	-0.162059	1	-0.28794	0.682626	-0.233808	0.365497	-0.323449	1	-0.228983	1	-0.394442	1	-0.070026	1	0.17256	1	0.0411552	1	-0.149121	0.989253	FALSE	FALSE	-0.409832	0	TRUE
Rps10	-0.36033	1	-0.0668836	1	-0.095607	1	-0.163862	1	-0.297368	1	-0.41568	4.72446e-14	-0.265174	0.000663882	-0.164273	1	-0.198961	1	-0.129104	2.57744e-17	-0.22125	0.00262867	-0.104225	1	-0.236556	1	-0.202568	0.689977	-0.232289	1	-0.163857	1	-0.331933	1	-0.286299	1	-0.0466316	1	-0.0421802	1	-0.109907	1	-0.196902	1.69307e-16	FALSE	FALSE	-0.284734	5.24535e-290	TRUE
Rps12	-0.199621	1	0.0917651	1	0.0408482	1	-0.0384457	1	0.095468	1	0.0509407	1	0.0668955	1	-0.0130091	1	-0.00155192	1	-0.11492	1.26313e-07	-0.122574	1	-0.123018	1	-0.263455	1	-0.122597	1	0.033113	1	-0.214296	1	-0.212748	1	-0.215705	1	-0.0584608	1	0.108581	1	0.0456753	1	-0.0555769	0.874533	FALSE	FALSE	-0.223585	6.98992e-127	TRUE
Rps19	-0.262689	1	-0.0720043	1	-0.207915	1	-0.137576	1	-0.19656	1	-0.303644	7.57144e-09	-0.107436	1	-0.259294	1	-0.0949656	1	-0.18029	1.01765e-25	-0.267001	8.00277e-05	-0.131071	1	-0.260612	1	-0.211437	1	-0.286987	1	-0.349667	1	-0.242777	1	-0.135124	1	-0.167974	1	-0.0409547	1	-0.111212	1	-0.191771	1.49592e-17	FALSE	FALSE	-0.23816	6.3603e-186	TRUE
Rps20	-0.254843	1	-0.0715991	1	-0.0199096	1	-0.206003	1	-0.162396	1	-0.219533	0.000689705	-0.0831802	1	-0.206358	1	-0.141861	1	-0.12152	3.15356e-18	-0.233525	0.000622942	-0.21576	1	-0.257553	1	-0.165577	1	-0.169073	1	-0.22884	1	-0.227759	1	-0.387148	0.716832	-0.199405	1	0.134603	1	0.0434769	1	-0.161608	4.39467e-08	FALSE	FALSE	-0.354357	0	TRUE
Rps6	-0.258959	1	-0.0507935	1	-0.108467	1	-0.0813916	1	0.00247991	1	0.0475391	1	-0.0306948	1	-0.247098	1	-0.167747	1	-0.104357	1.77736e-07	-0.348532	2.33112e-07	-0.113731	1	-0.205487	1	-0.271313	0.44999	-0.249727	1	-3.7152e-05	1	-0.221088	1	-0.295047	1	-0.174734	1	-0.00757596	1	-0.125353	1	-0.143434	0.0186855	FALSE	FALSE	-0.387917	0	TRUE
Rps8	-0.354999	1	-0.133326	1	-0.0135223	1	-0.0928904	1	0.0726774	1	-0.118267	1	-0.0276474	1	-0.114156	1	-0.0471159	1	-0.0172238	1	-0.251695	0.000633113	-0.108914	1	-0.136493	1	0.0084028	1	-0.120331	1	-0.140982	1	-0.12194	1	-0.225051	1	-0.176562	1	0.169518	1	0.0305286	1	-0.0914282	0.99997	FALSE	FALSE	-0.335118	0	TRUE
Rpsa	-0.0926232	1	0.0389125	1	-0.068342	1	-0.0470537	1	-0.233913	1	-0.190943	1	-0.0278146	1	-0.317782	1	-0.146685	1	-0.061252	1	-0.311147	3.94983e-05	-0.148901	1	-0.20881	1	-0.331136	0.0348412	-0.0399266	1	-0.0372151	1	-0.216098	1	-0.137837	1	-0.134397	1	0.0104598	1	-0.0950903	1	-0.133219	0.964995	FALSE	FALSE	-0.223747	3.80426e-148	TRUE
Scoc	-0.250663	1	-0.206167	1	-0.290513	1	0.093981	1	0.000352968	1	0.0781155	1	-0.197738	1	-0.075205	1	-0.240448	1	-0.0796356	1.17491e-10	-0.0021984	1	-0.239955	1	-0.149428	1	-0.169037	1	-0.0989313	1	0.0287238	1	-0.320246	1	-0.395677	1	-0.137064	1	0.0493784	1	-0.101423	1	-0.128751	0.319983	FALSE	FALSE	-0.203792	6.0733e-120	TRUE
Sdcbp	-0.0861245	1	-0.0513901	1	0.000125264	1	-0.457734	1	0.104695	1	-0.132729	1	-0.0125866	1	0.193801	1	-0.112863	1	-0.110678	8.42611e-22	-0.129256	1	-0.304156	1	-0.276593	1	-0.0536811	1	0.0369532	1	-0.0385919	1	-0.16855	1	-0.078322	1	-0.0288227	1	-0.275192	1	-0.109929	1	-0.0996011	3.02084e-06	FALSE	FALSE	-0.244681	1.14039e-174	TRUE
Sec61b	-0.0333687	1	-0.213826	1	0.079065	1	0.0271916	1	0.259559	1	-0.0326783	1	-0.334353	0.00697959	0.19581	1	-0.0924808	1	-0.0207183	1	-0.184663	1	-0.0644249	1	-0.0861829	1	0.0254341	1	-0.290051	1	-0.317249	1	0.146817	1	0.028502	1	-0.187722	1	0.0286784	1	-0.0668762	1	-0.053978	1	FALSE	FALSE	-0.241285	4.79728e-102	TRUE
Serp1	-0.233983	1	-0.324798	1	-0.272536	1	-0.470594	1	-0.0691789	1	-0.207658	1	-0.487155	8.34244e-06	-0.0072348	1	-0.386783	1	-0.0897288	1.30674e-06	-0.219196	1	-0.147197	1	-0.0154784	1	-0.173309	1	-0.175221	1	-0.159344	1	-0.191869	1	0.0363744	1	-0.173003	1	0.0151588	1	-0.233477	1	-0.18982	0.173225	FALSE	FALSE	-0.28651	1.8905e-126	TRUE
Sigmar1	-0.0511679	1	-0.181602	1	0.0950269	1	0.0759762	1	0.0101147	1	-0.271602	0.0300948	-0.133487	1	-0.148385	1	-0.0720323	1	-0.0646254	9.94693e-15	-0.20678	0.232758	-0.0373406	1	0.204501	1	-0.129095	1	0.00648383	1	-0.118919	1	0.068509	1	-0.310386	1	-0.147936	1	0.115099	1	-0.220432	1	-0.0722895	0.00151299	FALSE	FALSE	-0.236765	1.43715e-171	TRUE
Sox2	-0.0718729	1	-0.145616	1	-0.19491	1	0.287814	1	-0.166849	1	-0.0819268	1	-0.179141	1	-0.634408	1	-0.0141238	1	-0.102263	1.88769e-09	-0.161441	1	-0.0285848	1	-0.0793148	1	-0.165395	1	-0.405223	1	-0.308819	1	-0.422623	1	-0.388243	1	-0.341078	1	-0.319049	1	-0.223558	1	-0.197458	0.551284	FALSE	FALSE	-0.226297	1.09246e-95	TRUE
Sparc	0.368472	1	0.166135	1	0.368783	1	0.331224	1	0.223693	1	0.282738	1	0.130241	1	-0.453611	1	0.323612	1	0.230512	4.50777e-08	-0.112473	1	0.275863	1	0.509348	1	0.342258	1	-0.0838458	1	0.326607	1	0.665986	1	0.360389	1	0.00371328	1	0.0469019	1	-0.0669349	1	0.201886	0.811323	FALSE	FALSE	-0.385538	3.33549e-60	TRUE
Srm	-0.467773	1	-0.21134	1	0.135425	1	-0.243602	1	0.175694	1	-0.154314	1	-0.178598	1	-0.106882	1	0.0439445	1	0.0576126	1	-0.223404	1	-0.227006	1	-0.078856	1	0.0108852	1	-0.0653244	1	0.336712	1	0.274907	1	-0.151265	1	-0.0666942	1	0.366256	1	0.0277658	1	-0.0355169	1	FALSE	FALSE	-0.272992	5.99412e-107	TRUE
Srpk1	-0.353916	1	-0.190694	1	-0.40539	1	-0.286479	1	-0.115319	1	-0.0112519	1	-0.203201	1	-0.219901	1	-0.182909	1	-0.104543	3.49113e-07	-0.070402	1	-0.21594	1	-0.33287	1	0.00545343	1	-0.00735752	1	0.126744	1	0.0416755	1	-0.0473084	1	-0.199473	1	-0.460865	1	-0.0699895	1	-0.15733	0.922432	FALSE	FALSE	-0.246975	6.56845e-104	TRUE
Ssr3	-0.463482	1	0.0152668	1	-0.0820964	1	-0.57012	1	-0.214886	1	-0.0702392	1	-0.285664	0.338853	0.0936822	1	-0.21447	1	-0.223885	4.21168e-27	-0.181141	1	-0.183497	1	-0.0907501	1	-0.1635	1	0.0251373	1	-0.0306058	1	0.187848	1	-0.284212	1	0.0621333	1	-0.344598	1	-0.167677	1	-0.15175	5.69155e-10	FALSE	FALSE	-0.233057	2.03195e-107	TRUE
Stoml2	-0.310584	1	-0.230463	1	0.0144515	1	-0.0087609	1	-0.102169	1	-0.13585	1	-0.177186	1	0.0584406	1	-0.209584	1	-0.0690343	2.89743e-08	-0.208525	1	-0.268334	1	-0.0854001	1	-0.252726	1	-0.035133	1	0.0145131	1	-0.0851531	1	-0.148644	1	-0.191839	1	-0.0423956	1	-0.198329	1	-0.127272	0.780045	FALSE	FALSE	-0.221618	6.05263e-119	TRUE
Taf12	-0.17006	1	0.119697	1	-0.0737934	1	-0.303971	1	-0.145508	1	-0.349234	0.0301972	-0.336593	0.694644	-0.340184	1	-0.0871485	1	-0.212074	1.17896e-25	-0.308269	0.221728	-0.0263354	1	-0.178229	1	-0.129087	1	-0.0657414	1	-0.313098	1	0.0350088	1	-0.268738	1	-0.401377	1	-0.0833663	1	-0.314593	1	-0.188224	2.95281e-10	FALSE	FALSE	-0.393484	5.00931e-205	TRUE
Tcp1	-0.245738	1	-0.228288	1	-0.14195	1	-0.00499432	1	-0.138359	1	-0.154501	1	-0.122656	1	-0.373787	1	-0.18716	1	-0.122561	3.21085e-10	-0.166023	1	-0.0659472	1	-0.062249	1	-0.194584	1	-0.0473392	1	-0.0975536	1	-0.0198016	1	-0.231862	1	-0.0617951	1	-0.0672409	1	-0.146902	1	-0.137204	0.398359	FALSE	FALSE	-0.274702	2.20615e-147	TRUE
Thbs2	0.184474	1	0.0647466	1	0.416669	1	0.787428	1	-0.233801	1	0.0644955	1	-0.0557694	1	0.384141	1	0.499039	1	0.0873157	1	0.0684404	1	0.205962	1	0.215392	1	0.367867	1	0.179923	1	-0.217085	1	0.222996	1	0.0103789	1	0.109032	1	0.0242517	1	-0.0206608	1	0.160249	1	FALSE	FALSE	-0.298	7.22835e-110	TRUE
Tnnt2	-0.519718	1	0.0118589	1	-0.331082	1	0.147701	1	0.141948	1	0.0828463	1	-0.116013	1	-0.438708	1	-0.314773	1	-0.117339	3.02047e-06	-0.293	1	-0.202462	1	-0.112197	1	-0.160572	1	-0.0856979	1	-0.192157	1	0.124273	1	-0.259345	1	-0.340436	1	-0.749368	1	-0.261797	1	-0.189811	0.97972	FALSE	FALSE	-0.331991	1.61826e-128	TRUE
Tomm20	-0.235178	1	-0.255237	1	-0.180719	1	-0.164563	1	0.0867898	1	-0.195453	1	-0.108259	1	-0.13875	1	-0.0880421	1	-0.0551305	1	-0.251927	0.183432	0.0475362	1	-0.0133733	1	-0.300182	1	-0.147299	1	0.102344	1	-0.076963	1	-0.145213	1	-0.151377	1	-0.0805116	1	-0.190009	1	-0.121025	1	FALSE	FALSE	-0.238857	2.45111e-124	TRUE
Tpd52	-0.17188	1	-0.0332831	1	-0.0223428	1	-0.185868	1	0.245118	1	0.0833136	1	-0.117465	0.52186	-0.126641	1	-0.0647469	1	-0.0589621	2.38162e-16	-0.24455	0.202222	-0.349328	0.142594	-0.0964978	1	-0.178544	0.177944	-0.16363	1	-0.375734	1	0.0269677	1	-0.0288704	1	0.0420634	1	-0.089811	1	0.0368383	1	-0.0892311	0.000134408	FALSE	FALSE	-0.413961	0	TRUE
Ttll5	-0.0197813	1	-0.140174	1	0.045478	1	0.0759048	1	-0.0296612	1	-0.172169	1	0.103655	1	-0.320637	1	-0.0858542	1	-0.14288	1.92488e-41	-0.0945263	1	-0.0560591	1	-0.151397	1	-0.00392753	1	-0.284937	1	-0.27641	1	0.00176348	1	-0.223384	1	-0.0861275	1	-0.196742	1	-0.109225	1	-0.103195	2.75724e-20	FALSE	FALSE	-0.221097	5.69523e-210	TRUE
Uqcrh	0.147892	1	-0.089652	1	0.104905	1	-0.187919	1	0.185875	1	0.156723	1	0.117441	1	0.201152	1	-0.120737	1	0.0389219	1	-0.082728	1	-0.0365416	1	0.0492262	1	0.0418024	1	-0.141149	1	0.0670375	1	-0.0367022	1	-0.409512	1	0.0374079	1	0.0678343	1	0.015642	1	0.00604387	1	FALSE	FALSE	-0.266829	1.18627e-118	TRUE
Xist	-0.182068	1	0.130631	1	0.156969	1	-0.551795	1	-0.205381	1	0.552672	1	-0.052919	1	-0.409105	1	0.107833	1	0.381792	8.82183e-09	0.0545086	1	-0.380711	1	0.0630992	1	0.0534517	1	-0.220506	1	-0.810788	1	-0.223956	1	-0.21989	1	-0.158799	1	0.297878	1	-0.141145	1	-0.0837251	0.685933	FALSE	FALSE	-0.26892	3.01527e-42	TRUE
Ybx1	-0.369666	1	-0.0883783	1	-0.0375712	1	-0.396128	1	0.057801	1	-0.112332	1	-0.292283	0.000910707	-0.412042	1	-0.0921147	1	-0.0530871	1	-0.381891	9.63615e-06	-0.260155	1	-0.103695	1	-0.179282	1	-0.257453	1	0.0402229	1	-0.139272	1	-0.113608	1	-0.292333	1	-0.0778029	1	-0.150334	1	-0.176733	0.685492	FALSE	FALSE	-0.419258	0	TRUE
Yrdc	-0.230491	1	0.00958442	1	0.147626	1	-0.373891	1	0.0699281	1	-0.195064	0.382833	-0.133791	1	-0.277736	1	-0.127039	1	-0.0569736	8.60144e-07	-0.222735	0.794727	-0.348874	0.0931093	0.0964708	1	-0.0585372	1	-0.284402	1	0.334088	1	0.384899	1	-0.430296	1	-0.19337	1	0.337234	1	-0.141557	1	-0.0807108	0.767178	FALSE	FALSE	-0.235896	4.52909e-141	TRUE
Ywhae	-0.110375	1	-0.211696	1	-0.10205	1	0.141841	1	-0.0212698	1	-0.037641	1	-0.0341269	1	-0.389893	1	-0.0739831	1	-0.0160342	1	-0.10153	1	-0.141387	1	-0.0536485	1	-0.00306409	1	-0.149194	1	-0.11741	1	0.126103	1	-0.144762	1	-0.340561	1	0.167188	1	0.00651686	1	-0.0765227	1	FALSE	FALSE	-0.376865	5.35212e-289	TRUE
Ywhaq	-0.0344934	1	-0.154455	1	-0.22241	1	-0.196067	1	0.0783447	1	-0.0774691	1	-0.186636	1	-0.492105	1	-0.275452	1	-0.14505	1.56007e-13	-0.0259568	1	-0.134571	1	-0.440278	1	-0.192019	1	-0.0123261	1	-0.232107	1	0.0997269	1	-0.0386684	1	-0.157686	1	-0.140629	1	-0.0776978	1	-0.145619	0.0427503	FALSE	FALSE	-0.205611	2.07536e-90	TRUE
2010111I01Rik	0.344772	1	-0.0680608	1	0.0770093	1	-0.16608	1	0.441531	1	0.0768944	1	0.20867	1	0.281285	1	0.287843	1	0.122297	1	0.222659	1	0.121573	1	0.275605	1	0.297896	1	0.133972	1	-0.0880947	1	0.147377	1	0.554194	1	0.049879	1	0.0461463	1	0.16162	1	0.168047	1	FALSE	FALSE	0.244803	5.82006e-08	FALSE
Asap1	0.202317	1	0.252193	1	-0.127079	1	0.133916	1	-0.404248	1	0.191915	1	0.101598	1	0.362564	1	0.236905	1	0.110199	1	0.259823	1	0.170689	1	-0.0406085	1	0.283703	1	0.456992	1	0.0344404	1	0.100599	1	0.0212263	1	0.159767	1	0.0208609	1	0.41091	1	0.139937	1	FALSE	FALSE	0.377512	6.77762e-87	FALSE
Atp5c1	0.0504581	1	-0.22868	1	-0.00750244	1	-0.112509	1	0.0171341	1	-0.0270107	1	0.106208	1	0.0263699	1	-0.0435867	1	0.0594823	1	0.029857	1	0.307484	0.653087	0.090548	1	0.022857	1	-0.13589	1	0.400685	1	0.0468034	1	0.0816063	1	0.190044	1	0.0237438	1	-0.0723291	1	0.0393225	1	FALSE	FALSE	0.204085	1.70651e-49	FALSE
Atraid	0.205605	1	0.168338	1	0.276936	1	-0.172457	1	0.0344677	1	0.173803	1	0.306476	1	0.235831	1	0.141883	1	0.162128	1	0.290146	1	0.217705	1	0.171254	1	0.140613	1	0.219869	1	-0.0130278	1	0.275383	1	0.147405	1	0.195285	1	-0.0307895	1	0.197829	1	0.159271	1	FALSE	FALSE	0.293008	1.4075e-34	FALSE
Atxn10	0.33397	1	0.0388661	1	0.0947738	1	0.0623014	1	0.133765	1	0.190125	1	0.0915981	1	0.31234	1	0.451787	1	0.171883	0.0865221	0.152586	1	0.0426327	1	0.0140589	1	0.210032	1	0.117145	1	-0.298844	1	-0.139782	1	0.416137	1	-0.0420593	1	0.0445585	1	0.264172	1	0.126764	1	FALSE	FALSE	0.294296	1.03323e-59	FALSE
Caml	0.0968076	1	0.146264	1	0.0889317	1	-0.232095	1	0.331469	1	0.183188	1	0.131112	1	0.265401	1	0.031482	1	0.133544	1	0.207478	1	0.0385866	1	-0.180062	1	0.163398	1	0.317469	1	0.220666	1	0.133412	1	0.251643	1	0.118103	1	-0.10757	1	0.0771373	1	0.115065	1	FALSE	FALSE	0.240077	1.71043e-10	FALSE
Cast	0.383493	1	0.708421	0.962391	-0.0120092	1	0.203749	1	0.394134	1	0.292561	1	0.0565849	1	0.35508	1	0.0510016	1	0.0283597	1	0.0979209	1	0.286504	1	-0.108098	1	0.214507	1	0.000165533	1	0.0746112	1	0.348288	1	-0.0329628	1	0.104437	1	-0.0374303	1	0.0884114	1	0.166559	1	FALSE	FALSE	0.239651	6.66805e-25	FALSE
Ccdc34	-0.00936239	1	0.192588	1	-0.0329966	1	0.0567239	1	-0.271854	1	-0.0435394	1	0.202947	1	-0.248014	1	-0.346102	1	0.0782498	1	0.0459299	1	-0.210952	1	0.0765924	1	-0.0170971	1	0.0239143	1	-0.0718521	1	-0.0234684	1	-0.026742	1	-0.146715	1	0.0518796	1	0.0544543	1	-0.0316865	1	FALSE	FALSE	0.203051	2.07696e-06	FALSE
Cebpb	0.304428	1	-0.246532	1	0.0383242	1	0.0661321	1	0.217127	1	0.0725043	1	0.105037	1	0.984828	0.209323	-0.221034	1	-0.0309584	1	0.315622	1	0.119	1	0.315426	1	0.309087	1	0.232571	1	-0.396028	1	-0.253533	1	0.289633	1	0.560143	1	-0.171885	1	0.02383	1	0.125415	1	FALSE	FALSE	0.539685	7.4188e-104	FALSE
Chd3	0.423823	1	0.340453	1	0.0877275	1	-0.218595	1	0.434229	1	0.198122	1	0.226073	1	-0.130951	1	0.334211	1	0.0641699	1	0.129057	1	0.351146	1	0.21172	1	0.208757	1	0.243215	1	0.22014	1	0.0285796	1	0.386873	1	0.0241371	1	-0.0567611	1	0.0872358	1	0.171112	1	FALSE	FALSE	0.231991	1.07867e-12	FALSE
Chmp4b	0.219097	1	-0.026029	1	0.257723	1	-0.19752	1	0.252005	1	0.198367	1	0.13595	1	0.266801	1	0.0578017	1	0.100013	1	0.178862	1	0.0218137	1	0.0810756	1	0.190256	1	0.0915064	1	-0.121843	1	0.270807	1	0.422616	1	0.109337	1	0.0530713	1	0.0519889	1	0.124462	1	FALSE	FALSE	0.270771	1.157e-55	FALSE
Clk1	0.283143	1	-0.124184	1	0.214699	1	0.370502	1	0.157488	1	0.445654	1	0.360911	1	0.193435	1	0.22293	1	0.142825	1	0.372226	1	0.278368	1	0.194151	1	0.161121	1	0.358325	1	-0.0646437	1	-0.0189683	1	-0.0705185	1	0.302051	1	-0.03933	1	-0.0447592	1	0.175973	1	FALSE	FALSE	0.263855	2.7222e-16	FALSE
Coa3	0.314423	1	-0.0242044	1	0.0678631	1	-0.137402	1	0.307543	1	0.0865692	1	-0.0840745	1	-0.0514625	1	0.124712	1	0.0225651	1	0.0865699	1	-0.00460729	1	0.112283	1	-0.115915	1	0.0555342	1	0.203252	1	0.385557	1	0.144458	1	-0.0386442	1	0.0753127	1	-0.0611259	1	0.0699622	1	FALSE	FALSE	0.276446	1.95958e-34	FALSE
Col4a1	0.138156	1	0.054171	1	0.0896859	1	-0.148389	1	0.231629	1	0.0907552	1	0.071329	1	0.0179669	1	0.243423	1	0.0660202	1	0.295794	1	-0.114305	1	0.181104	1	0.112921	1	-0.02019	1	0.299612	1	0.0784392	1	0.230223	1	-0.246691	1	0.250543	1	0.0672732	1	0.0947367	1	FALSE	FALSE	0.219891	0.0110471	FALSE
Cox6c	0.280601	1	-0.168823	1	0.0097129	1	-0.0812587	1	0.0886135	1	0.216811	1	0.202852	1	0.0763106	1	0.0440828	1	0.196088	3.27525e-15	0.0582242	1	0.163347	1	0.187471	1	0.220996	1	0.103595	1	0.0828223	1	0.0928828	1	0.230962	1	0.164334	1	0.247027	1	0.201533	1	0.124675	0.00897651	FALSE	FALSE	0.214139	1.06212e-67	FALSE
Cox7b	0.151616	1	-0.248418	1	-0.0823477	1	-0.149067	1	0.212078	1	0.361013	0.519432	-0.176621	1	0.630534	1	-0.152395	1	0.0264871	1	0.0460173	1	0.0919073	1	-0.0287719	1	0.159303	1	-0.165703	1	0.192904	1	0.0780453	1	0.150163	1	0.244845	1	0.0314607	1	0.0526761	1	0.0678917	1	FALSE	FALSE	0.228745	2.83247e-44	FALSE
Creg1	0.322184	1	0.223017	1	0.012779	1	0.0596133	1	0.250985	1	0.0585529	1	-0.0120196	1	0.153485	1	0.121034	1	0.130003	1	0.145887	1	0.0943827	1	0.279035	1	0.0613985	1	0.0760837	1	0.505313	1	0.0547592	1	-0.031313	1	0.225176	1	0.0116265	1	-0.028577	1	0.12921	1	FALSE	FALSE	0.251834	0.0305553	FALSE
Csf1	0.0950075	1	0.328492	1	0.257708	1	0.185422	1	0.363747	1	0.26627	1	0.0977513	1	0.294154	1	0.0536983	1	0.16099	1	0.0694177	1	0.251726	1	0.00953778	1	0.110997	1	0.489287	1	0.278109	1	0.381575	1	0.122416	1	0.233051	1	0.0586504	1	-0.0536922	1	0.193063	1	FALSE	FALSE	0.281939	4.00834e-22	FALSE
Cstb	0.163239	1	0.321875	1	0.164243	1	0.0806904	1	0.276848	1	0.177794	1	0.13551	1	0.395261	1	0.0383969	1	0.0827913	1	0.256001	1	0.337139	1	0.0905665	1	0.235557	1	-0.167865	1	0.145066	1	0.0130581	1	0.457641	1	0.248827	1	0.0437614	1	-0.0365159	1	0.164756	1	FALSE	FALSE	0.354596	2.38611e-101	FALSE
Ctsa	0.313627	1	0.0394318	1	0.178666	1	0.222516	1	-0.135043	1	0.217656	1	0.391717	1	0.433936	1	0.169388	1	0.156237	1	0.0758835	1	0.201023	1	0.0783238	1	0.218173	1	-0.00851587	1	-0.28963	1	0.248484	1	0.353738	1	0.259915	1	0.0261767	1	0.357252	1	0.167093	1	FALSE	FALSE	0.246123	4.42115e-05	FALSE
Ctsl	0.412288	1	0.182721	1	-0.0397849	1	0.141416	1	-0.0778137	1	0.153066	1	-0.0845078	1	0.253523	1	-0.00135234	1	0.153679	0.0750014	0.175681	1	-0.100435	1	-0.0127425	1	-0.00135451	1	0.211415	1	-0.152006	1	-0.273891	1	0.346852	1	-0.0184807	1	0.781355	1	0.088454	1	0.101813	1	FALSE	FALSE	0.421838	1.18834e-124	FALSE
Ctsz	0.271348	1	-0.137872	1	0.23805	1	0.0457347	1	-0.0178024	1	0.189483	1	0.12988	1	0.217436	1	0.245826	1	0.138356	1	0.288759	1	0.00175441	1	0.368514	1	0.295556	1	0.423821	1	0.366274	1	0.183656	1	-0.0846247	1	0.10531	1	0.252065	1	0.111551	1	0.173004	1	FALSE	FALSE	0.205327	2.79382e-27	FALSE
Ddrgk1	0.217334	1	0.431366	1	0.160475	1	0.157022	1	0.138193	1	0.157714	1	0.182161	1	0.144999	1	0.14646	1	0.106448	1	0.182457	1	0.313084	1	0.176028	1	0.234307	1	0.325996	1	0.203026	1	-0.0313747	1	0.303913	1	-0.131401	1	0.138831	1	0.296758	1	0.183514	1	FALSE	FALSE	0.295111	1.15e-53	FALSE
Ddx39b	0.214197	1	-0.254138	1	0.180961	1	0.0337703	1	-0.193294	1	0.0431457	1	0.182517	1	0.137366	1	0.178953	1	0.125027	1	0.139389	1	0.156869	1	0.181377	1	0.0566543	1	0.259025	1	-0.169212	1	0.177069	1	0.400921	1	0.0151844	1	0.131532	1	0.0659853	1	0.0982523	1	FALSE	FALSE	0.286931	6.85151e-40	FALSE
Ddx5	0.173556	1	-0.0114229	1	-0.044368	1	0.0198388	1	0.0208891	1	0.0883343	1	0.204938	1	0.056499	1	0.22748	1	-0.135212	2.26353e-09	0.0366378	1	0.00452074	1	-0.240628	1	0.0438594	1	0.117428	1	0.0322802	1	0.106002	1	0.219193	1	-0.0305169	1	-0.240738	1	0.0417424	1	0.032872	0.567412	FALSE	FALSE	0.235153	1.96885e-72	FALSE
Dek	-0.211947	1	-0.0260377	1	-0.0540909	1	-0.0641793	1	0.00673197	1	0.231198	1	0.0508566	1	0.150019	1	0.0215139	1	0.220895	2.23206e-05	0.202705	1	0.0263783	1	0.263817	1	0.18968	1	0.226151	1	-0.0952096	1	-0.0547294	1	0.0215919	1	0.11399	1	-0.164827	1	0.252359	1	0.0622317	0.996519	FALSE	FALSE	0.237155	1.44879e-20	FALSE
Dync1i2	0.192977	1	0.0459938	1	-0.0660918	1	0.369501	1	0.081131	1	0.282834	1	0.296158	1	0.196197	1	0.250054	1	0.190134	2.34839e-07	0.407971	0.976179	0.116104	1	0.254038	1	0.352738	1	0.283814	1	-0.0236272	1	0.219877	1	-0.104711	1	0.155346	1	0.231045	1	0.0870806	1	0.181836	0.904385	FALSE	FALSE	0.40194	9.61472e-162	FALSE
Dynlrb1	0.167114	1	0.284685	1	0.0778828	1	0.241837	1	-0.0225091	1	0.0344917	1	0.0997524	1	0.224776	1	0.210547	1	0.106977	1	0.220492	1	0.290635	1	0.171839	1	0.193372	1	0.121546	1	0.355461	1	0.261367	1	0.381747	1	0.0251344	1	0.328404	1	0.126646	1	0.185819	1	FALSE	FALSE	0.219666	5.1521e-25	FALSE
Ebp	0.804781	0.0685525	-0.0501551	1	-0.162159	1	-0.187013	1	-0.223159	1	-0.118099	1	-0.122798	1	0.376639	1	0.212688	1	0.0906686	1	0.292879	1	0.0913809	1	0.263976	1	0.216715	1	-0.0122222	1	0.0771277	1	0.176344	1	0.0993339	1	-0.214263	1	0.0567631	1	-0.207389	1	0.0696209	1	FALSE	FALSE	0.258671	1.75756e-25	FALSE
Edf1	0.153866	1	-0.173955	1	0.3315	1	-0.0841942	1	0.247521	1	-0.00978361	1	0.0325358	1	0.266933	1	0.168171	1	0.111886	0.0618656	0.0543907	1	-0.113978	1	0.228179	1	-0.0520746	1	-0.103424	1	0.132457	1	-0.00504107	1	0.160693	1	-0.012852	1	0.179847	1	0.12404	1	0.0779388	1	FALSE	FALSE	0.203386	3.17063e-45	FALSE
Ehd4	0.0275955	1	-0.165354	1	0.145905	1	-0.0106855	1	0.290073	1	0.139644	1	0.152167	1	0.293123	1	0.121636	1	0.130022	1	0.107215	1	0.207017	1	0.181496	1	0.230411	1	0.146232	1	0.194566	1	0.299208	1	0.0882223	1	0.214043	1	0.254134	1	0.189666	1	0.154111	1	FALSE	FALSE	0.206138	0.0033035	FALSE
Eif2s2	-0.129959	1	0.193605	1	0.0105834	1	0.120637	1	-0.187534	1	0.106647	1	-0.00721338	1	0.0762066	1	0.169671	1	0.0957366	1	0.0749585	1	-0.105913	1	0.307642	1	0.231398	1	-0.0032775	1	0.0621954	1	0.250424	1	-0.119588	1	-0.0296374	1	0.125124	1	0.0361822	1	0.0608518	1	FALSE	FALSE	0.216206	8.70511e-59	FALSE
Eif3h	0.0242458	1	0.22383	1	-0.136748	1	0.127687	1	-0.238256	1	-0.0139432	1	0.0229506	1	0.0789639	1	0.0198122	1	0.147522	3.27585e-05	-0.0282957	1	0.0410362	1	0.0728674	1	0.00836887	1	-0.0184317	1	0.0508042	1	-0.137532	1	0.243202	1	0.25357	1	0.167228	1	-0.0499467	1	0.0409017	0.997694	FALSE	FALSE	0.299888	3.75969e-118	FALSE
Eif3j1	-0.107424	1	-0.0691211	1	-0.087469	1	-0.0501449	1	0.440421	1	0.263598	1	-0.0173638	1	0.206917	1	0.0924078	1	0.200822	0.0341289	0.0844291	1	0.00426685	1	0.145707	1	0.297772	1	0.447006	1	0.100349	1	0.249593	1	0.0966306	1	-0.0294293	1	0.266065	1	0.171028	1	0.12886	1	FALSE	FALSE	0.244	1.09937e-23	FALSE
Eif6	0.205237	1	0.325061	1	-0.0784156	1	-0.0265481	1	0.286153	1	-0.0164014	1	0.14602	1	0.0461168	1	0.0714234	1	0.144395	0.20721	0.090194	1	0.00362266	1	0.24152	1	0.0127983	1	-0.11431	1	0.293338	1	0.283042	1	0.346868	1	-0.14329	1	0.269898	1	0.195092	1	0.122944	1	FALSE	FALSE	0.219825	6.07619e-33	FALSE
Emilin1	0.135468	1	-0.0343344	1	-0.147031	1	0.111945	1	-0.0278087	1	0.196717	1	0.191695	1	-0.0923087	1	0.145483	1	0.0214268	1	0.139338	1	0.109798	1	0.17353	1	0.139198	1	0.111313	1	-0.134361	1	-0.0167665	1	0.0506552	1	0.135484	1	0.0224828	1	0.139529	1	0.0653073	1	FALSE	FALSE	0.209611	6.59505e-10	FALSE
Eny2	0.425685	1	0.00571619	1	0.00304789	1	-0.0231415	1	0.134693	1	0.0808547	1	0.0450397	1	0.0499776	1	0.257766	1	0.17188	0.013479	-0.000147479	1	0.185693	1	0.0490343	1	0.109224	1	0.120075	1	0.308865	1	0.098195	1	-0.015334	1	0.0164581	1	0.199414	1	-0.0228122	1	0.104771	1	FALSE	FALSE	0.201745	5.09185e-24	FALSE
Ergic3	0.120603	1	0.123886	1	0.208256	1	0.0308814	1	0.0162804	1	0.0326747	1	0.118322	1	-0.0737924	1	0.159237	1	0.0848335	1	0.135826	1	0.0873296	1	-0.049637	1	0.0180663	1	-0.06166	1	-0.0738792	1	0.232663	1	0.152158	1	-0.00550207	1	-0.0176677	1	0.0751	1	0.0625704	1	FALSE	FALSE	0.204132	1.27085e-11	FALSE
Esd	-0.0807494	1	0.0920272	1	0.116101	1	-0.0367386	1	0.450862	1	-0.157613	1	-0.106607	1	0.231585	1	0.256474	1	0.0613395	1	0.084716	1	0.10776	1	0.377105	1	0.247014	1	-0.0308426	1	0.28417	1	0.0596509	1	0.0972846	1	-0.093023	1	0.164144	1	0.250649	1	0.11311	1	FALSE	FALSE	0.269906	4.05629e-69	FALSE
Ext1	0.229495	1	0.00822184	1	-0.0532741	1	0.032165	1	0.22753	1	0.434835	1	0.372066	1	0.336111	1	0.133507	1	0.00982005	1	0.167525	1	-0.318036	1	-0.0731945	1	0.108086	1	0.122618	1	0.364249	1	0.417591	1	-0.0366339	1	-0.144887	1	-0.0474187	1	0.00586771	1	0.109345	1	FALSE	FALSE	0.229796	4.29221e-09	FALSE
Fbln2	-0.08289	1	-0.181431	1	-0.274091	1	-0.17106	1	0.2678	1	0.189433	1	-0.123532	1	0.858338	1	0.11695	1	0.0251136	1	0.0661317	1	-0.0473444	1	-0.151797	1	0.095509	1	0.307297	1	-0.032821	1	0.0107816	1	0.134544	1	0.112408	1	-0.0404347	1	0.483572	1	0.0744037	1	FALSE	FALSE	0.303402	2.73764e-19	FALSE
Fkbp1a	0.149878	1	-0.0367041	1	0.179375	1	-0.200379	1	0.234474	1	0.190201	1	0.123398	1	0.0508857	1	0.193665	1	0.15124	1.63751e-05	0.0982843	1	0.0870835	1	0.128179	1	0.119001	1	-0.0816898	1	0.180839	1	-0.0266055	1	0.371457	1	0.114719	1	-0.0535035	1	0.107499	1	0.0991093	0.995237	FALSE	FALSE	0.213497	1.449e-48	FALSE
Gas1	0.30756	1	0.0627067	1	-0.00359295	1	-0.0443669	1	0.0420862	1	0.318591	1	0.248967	1	0.638537	1	0.04397	1	0.10442	1	0.31949	1	0.183831	1	0.30645	1	0.205256	1	0.265558	1	0.594109	1	0.165294	1	0.230541	1	0.0495266	1	-0.155421	1	0.0351556	1	0.186603	1	FALSE	FALSE	0.381457	3.88241e-28	FALSE
Gchfr	0.295537	1	0.136454	1	0.134207	1	0.00837326	1	-0.0018716	1	0.045012	1	0.0652216	1	0.271597	1	0.177023	1	0.18739	1	0.125603	1	0.0461689	1	-0.03851	1	0.2154	1	-0.00189373	1	0.372807	1	0.369672	1	0.0185902	1	0.14397	1	0.367141	1	-0.0217312	1	0.138865	1	FALSE	FALSE	0.344081	4.38056e-43	FALSE
Gm42418	-0.190242	1	0.149798	1	0.301998	1	0.486607	1	-0.299177	1	-0.0793108	1	0.171363	1	-0.0427835	1	-0.12749	1	0.0764432	1	-0.0704355	1	-0.0605252	1	0.217211	1	-0.302676	1	0.545875	1	-0.0985037	1	0.156686	1	0.0570492	1	0.375402	1	0.0988381	1	-0.329682	1	0.0493545	1	FALSE	FALSE	0.20389	2.75788e-31	FALSE
Gnas	0.360639	1	0.0880831	1	-0.101068	1	-0.147507	1	-0.197502	1	-0.0828681	1	0.166931	1	0.0286124	1	0.149004	1	0.0192582	1	0.197828	1	0.108217	1	-5.80371e-05	1	-0.0638071	1	-0.021683	1	-0.0394151	1	-0.00243203	1	-0.105224	1	0.0720198	1	-0.0436822	1	0.0688644	1	0.0216291	1	FALSE	FALSE	0.215309	3.55581e-96	FALSE
Gpx4	0.364986	1	0.00876816	1	0.30997	1	-0.0368624	1	0.361208	1	0.0216835	1	0.0255525	1	0.0543532	1	0.0190854	1	0.122029	0.000365521	0.145147	1	0.0217379	1	0.272025	1	0.130958	1	0.129042	1	0.150917	1	0.288227	1	0.199169	1	0.169291	1	-0.00545365	1	-0.140023	1	0.124372	0.999919	FALSE	FALSE	0.239594	5.94145e-89	FALSE
Grina	0.425417	1	0.0201717	1	0.197544	1	-0.0248058	1	0.132971	1	0.291955	1	0.178201	1	0.155452	1	0.0952044	1	0.230726	1	0.184248	1	0.127214	1	0.180967	1	0.375407	1	-0.0333989	1	-0.373554	1	0.184466	1	0.361432	1	0.288464	1	0.388995	1	0.183281	1	0.170017	1	FALSE	FALSE	0.400666	3.12806e-51	FALSE
H13	0.171501	1	-0.0562056	1	0.163163	1	0.11642	1	0.0110732	1	0.188194	1	0.199749	1	0.372888	1	0.225656	1	0.0651726	1	0.278567	1	0.320066	1	0.122561	1	0.1785	1	-0.0808376	1	0.0321243	1	0.330437	1	0.104099	1	0.0976826	1	0.165139	1	0.146915	1	0.150136	1	FALSE	FALSE	0.205844	4.43086e-13	FALSE
H2afv	0.34501	1	-0.17739	1	-0.0816461	1	-0.0272227	1	-0.257124	1	-0.0840752	1	0.15559	1	0.119351	1	0.327714	1	0.100767	1	0.314685	1	0.140092	1	0.3202	1	-0.316864	1	0.153511	1	-0.367792	1	0.0755942	1	0.194317	1	0.135157	1	0.112932	1	-0.398507	1	0.0373475	1	FALSE	FALSE	0.25189	6.48732e-23	FALSE
Hk2	-0.356395	1	0.399191	1	0.377625	1	0.857898	1	0.0383797	1	0.47518	1	0.137735	1	0.425833	1	0.150323	1	0.220113	0.229039	0.332328	1	0.0228637	1	0.176348	1	0.379277	1	-0.0903641	1	-0.107855	1	0.060441	1	-0.148366	1	0.0864558	1	0.205497	1	-0.1582	1	0.165919	1	FALSE	FALSE	0.250502	1.23792e-12	FALSE
Hsd17b10	-0.106218	1	-0.475287	1	-0.293567	1	0.0319938	1	0.043639	1	0.134737	1	-0.0504043	1	0.697229	1	0.0149689	1	0.0507963	1	0.142221	1	0.279827	1	0.210325	1	0.20822	1	0.208176	1	0.354104	1	0.103445	1	0.0257134	1	-0.0740899	1	-0.00977762	1	0.0670534	1	0.0744336	1	FALSE	FALSE	0.213826	1.00828e-28	FALSE
Ier3	0.112662	1	0.166543	1	-0.0502424	1	0.359971	1	-0.0245942	1	-0.0291493	1	-0.0489295	1	0.265831	1	0.127432	1	0.224619	0.000165703	0.287468	1	0.143354	1	-0.0423012	1	0.403491	1	0.458971	1	0.330426	1	0.0533941	1	0.0709083	1	0.131495	1	-0.159033	1	0.13016	1	0.138689	0.999713	FALSE	FALSE	0.219097	1.34857e-15	FALSE
Ifi27l2a	0.0674086	1	0.11221	1	0.0238643	1	0.0445216	1	0.00844186	1	0.204437	1	0.299094	1	0.24993	1	0.301084	1	0.190247	0.0621742	0.105537	1	0.0894959	1	-0.102269	1	0.273262	1	0.199072	1	0.354025	1	0.116975	1	0.266375	1	0.229751	1	0.193081	1	0.115092	1	0.159125	1	FALSE	FALSE	0.214812	2.5747e-19	FALSE
Ifi47	0.256207	1	0.129088	1	0.198732	1	0.00328401	1	-0.215881	1	0.322119	1	0.18214	1	0.133267	1	0.19905	1	0.191584	1	0.283349	0.497903	0.0527922	1	0.360921	1	0.227905	1	0.140308	1	0.428397	1	0.246379	1	-0.0217166	1	0.331514	1	0.172051	1	0.235148	1	0.183649	1	FALSE	FALSE	0.226578	6.79473e-08	FALSE
Knop1	0.171308	1	-0.0231877	1	0.0956282	1	0.0492616	1	0.175805	1	0.187423	1	0.0436927	1	0.0221747	1	0.129149	1	0.151523	1	0.159706	1	-0.0852911	1	0.054187	1	0.255262	1	0.15754	1	-0.0339853	1	0.504254	1	0.246028	1	0.151293	1	0.47467	1	0.130562	1	0.143667	1	FALSE	FALSE	0.226326	7.14104e-09	FALSE
Krt8	0.354847	1	-0.401941	1	0.0286333	1	-0.106286	1	0.214878	1	-0.443717	1	0.254431	1	0.629219	1	0.148203	1	0.111159	0.120013	-0.104804	1	-0.0427094	1	0.43473	1	0.85762	0.0270298	-0.371819	1	-0.0830275	1	-0.0598346	1	0.514381	1	-0.560618	1	0.10669	1	0.225549	1	0.0812183	0.999999	FALSE	FALSE	0.204951	8.76549e-12	FALSE
Lgals1	0.0703769	1	-0.0680433	1	-0.0487525	1	-0.0396256	1	0.400787	1	-0.272821	0.0103754	0.168522	1	-0.125274	1	0.21231	1	0.0992003	0.204436	0.00107027	1	0.253425	1	-0.0585113	1	0.139797	1	-0.131947	1	-0.0888142	1	0.316142	1	0.149766	1	-0.103395	1	-0.00616726	1	0.113864	1	0.0467577	0.999998	FALSE	FALSE	0.227046	5.01783e-73	FALSE
Lgals7	0.105954	1	0.112638	1	0.191043	1	0.153614	1	0.395064	1	0.0906259	1	0.100818	1	-0.345182	1	0.190976	1	0.106837	6.05547e-07	0.0658324	1	0.342765	1	0.0264313	1	0.161995	1	0.0221721	1	0.33212	1	0.371654	1	0.122652	1	0.137082	1	-0.0750357	1	-0.0125847	1	0.123689	0.942394	FALSE	FALSE	0.252748	5.30497e-106	FALSE
Mfge8	0.315513	1	0.4503	1	0.293296	1	-0.0878075	1	0.0686226	1	0.223778	1	0.000512596	1	-0.0612346	1	-0.12289	1	0.145189	1	0.125692	1	0.233134	1	0.0353819	1	0.329343	1	0.13724	1	-0.103858	1	0.245052	1	-0.210589	1	0.319853	1	-0.231198	1	0.307718	1	0.114907	1	FALSE	FALSE	0.220156	8.42974e-15	FALSE
Mgst2	0.113277	1	-0.187997	1	0.0215846	1	-0.0362178	1	0.0499536	1	-0.05028	1	-0.0607596	1	0.347191	1	0.0733207	1	-0.119487	2.26397e-14	0.210991	1	0.413965	1	-0.0876301	1	-0.130913	1	0.0607497	1	-0.141817	1	-0.11921	1	0.021142	1	-0.0999429	1	-0.11669	1	-0.19034	1	-0.00138615	0.0202184	FALSE	FALSE	0.29259	4.49058e-23	FALSE
Mrpl13	-0.183142	1	0.0837984	1	0.32342	1	0.140622	1	0.246744	1	0.169286	1	0.0692472	1	0.127734	1	-0.0478737	1	0.2255	7.93915e-10	0.157606	1	0.208238	1	0.10032	1	-0.0693274	1	0.372298	1	0.0636303	1	0.382323	1	0.310704	1	-0.04399	1	0.327682	1	-0.0861793	1	0.137078	0.474964	FALSE	FALSE	0.232099	4.1888e-38	FALSE
Mt1	0.418376	1	0.404037	1	0.168819	1	0.36473	1	-1.2516	1	0.590567	1	0.815848	7.75845e-06	-0.0895476	1	0.497863	1	0.503736	2.66648e-21	-0.157702	1	0.358627	1	-0.455206	1	0.00284789	1	-0.284235	1	0.251962	1	0.0490208	1	0.170154	1	0.670358	1	0.00591624	1	0.22619	1	0.155274	3.47745e-09	FALSE	FALSE	0.27756	1.75974e-20	FALSE
Ndufa6	0.0879251	1	-0.0612168	1	0.116431	1	0.297072	1	0.0127384	1	0.135119	1	0.178172	1	0.168237	1	0.0972743	1	0.137061	1	-0.0349637	1	0.0678283	1	0.0152142	1	0.183111	1	-0.0649382	1	0.108084	1	-0.231273	1	0.201066	1	0.186917	1	0.175499	1	0.223305	1	0.0951745	1	FALSE	FALSE	0.202196	2.17848e-26	FALSE
Ndufa8	0.0376548	1	0.196683	1	0.078868	1	0.126045	1	0.4368	1	-0.0819951	1	0.0343498	1	0.154762	1	0.127322	1	0.0571338	1	0.0229341	1	0.182093	1	0.280659	1	-0.0209262	1	0.116882	1	0.115769	1	0.194564	1	0.219302	1	-0.0228917	1	0.114986	1	0.0272076	1	0.1142	1	FALSE	FALSE	0.214523	1.17469e-38	FALSE
Ndufs6	0.0636018	1	-0.205009	1	0.192024	1	0.144733	1	0.110636	1	0.411852	0.020365	0.0484489	1	0.190092	1	0.115568	1	0.108178	1	0.0868535	1	0.226007	1	0.139216	1	0.0536029	1	-0.047596	1	0.223364	1	0.27312	1	0.364155	1	-0.0544168	1	0.0433113	1	-0.00248112	1	0.118346	1	FALSE	FALSE	0.205815	5.5651e-32	FALSE
Nfkbia	0.48409	1	-0.536109	1	0.154278	1	-0.108099	1	-0.286386	1	-0.291067	1	0.387748	1	-0.00882699	1	0.0450025	1	0.220476	0.000199599	0.495316	1	0.159574	1	-0.498875	1	-0.0423541	1	0.394442	1	-0.0805003	1	-0.161531	1	-0.0277581	1	-0.123306	1	-0.259805	1	-0.0930745	1	-0.00841736	0.999783	FALSE	FALSE	0.350195	1.6519e-40	FALSE
Npdc1	0.219806	1	-0.143621	1	0.290626	1	0.275777	1	0.215425	1	-0.0337492	1	0.0873685	1	0.239072	1	0.196445	1	0.0640221	1	0.0720593	1	0.140412	1	-0.00617012	1	0.0729636	1	0.115777	1	0.149088	1	0.0745193	1	0.144789	1	0.235804	1	0.0423703	1	0.0612867	1	0.119718	1	FALSE	FALSE	0.214056	0.00658356	FALSE
Nsmce2	0.336516	1	0.0557729	1	0.43347	1	0.0272339	1	0.116046	1	0.0358178	1	0.138538	1	-0.0717079	1	-0.0126399	1	0.184111	0.00102344	0.146967	1	0.0835423	1	0.374386	1	0.204962	1	0.153486	1	0.174879	1	-0.0834428	1	0.0266036	1	0.0497881	1	0.255152	1	0.187114	1	0.134124	0.999989	FALSE	FALSE	0.234353	1.94524e-33	FALSE
Nudcd3	0.310057	1	-0.204563	1	-0.0345144	1	0.197919	1	0.110041	1	0.197151	1	0.0275511	1	-0.038222	1	0.150152	1	0.123537	1	0.20371	1	0.24886	1	0.0244671	1	0.197686	1	0.40824	1	0.0708822	1	0.225688	1	0.241117	1	0.0931568	1	0.00871937	1	0.0872868	1	0.126139	1	FALSE	FALSE	0.252802	2.57034e-16	FALSE
Plec	-0.131775	1	0.224587	1	-0.0646926	1	0.0477745	1	0.252747	1	0.278834	1	0.169134	1	0.0587803	1	-0.0933759	1	0.0946883	1	0.161052	1	0.232606	1	0.408431	1	0.534936	1	0.125092	1	-0.123853	1	0.272835	1	0.124259	1	0.226831	1	0.218225	1	0.239446	1	0.155074	1	FALSE	FALSE	0.219815	5.44109e-16	FALSE
Plekho1	0.106518	1	0.0807056	1	-0.0668503	1	0.0256903	1	0.0650298	1	0.126142	1	0.152974	1	-0.140355	1	0.0963623	1	0.0689479	1	0.11649	1	0.0555392	1	-0.217705	1	-0.085915	1	-0.118013	1	-0.0742359	1	-0.261051	1	0.359601	1	0.0770756	1	0.0418582	1	-0.128099	1	0.0133671	1	FALSE	FALSE	0.24433	0.0269972	FALSE
Ppia	0.21568	1	0.0608892	1	0.0953439	1	-0.0252985	1	0.0652549	1	-0.066677	1	0.069279	1	-0.318611	1	0.0098732	1	0.0121357	1	-0.0550239	1	0.093633	1	0.0257065	1	-0.2514	0.250718	-0.0296733	1	0.147459	1	0.0760482	1	0.0980243	1	-0.100376	1	-0.0271745	1	-0.101022	1	-0.000282364	1	FALSE	FALSE	0.243136	2.42015e-180	FALSE
Prpf4b	-0.179857	1	0.142036	1	-0.104019	1	0.447478	1	0.197132	1	0.32836	1	0.0922153	1	0.145401	1	-0.0178258	1	0.0828355	1	0.332857	1	0.0317823	1	0.22382	1	0.165801	1	0.395083	1	0.113382	1	0.15168	1	0.21028	1	0.0414503	1	-0.0134158	1	-0.0299272	1	0.131264	1	FALSE	FALSE	0.239692	1.42862e-28	FALSE
Prr13	0.298241	1	0.395206	1	-0.0530995	1	0.0508532	1	0.133434	1	0.132754	1	0.0992869	1	0.223379	1	0.18536	1	0.129652	1	0.125868	1	0.245825	1	-0.0973973	1	0.190786	1	-0.0795929	1	0.110442	1	-0.127181	1	0.566874	1	-0.00276588	1	0.0645102	1	0.251638	1	0.135432	1	FALSE	FALSE	0.279425	7.34549e-14	FALSE
Psap	0.286592	1	0.200613	1	0.312402	1	0.33608	1	0.618886	1	0.257252	1	0.256079	1	0.206102	1	0.19105	1	0.146846	1	0.18027	1	0.184184	1	0.151042	1	0.232638	1	0.278688	1	0.300619	1	-0.0384257	1	0.000646592	1	0.0825391	1	-0.167519	1	-0.159062	1	0.183692	1	FALSE	FALSE	0.228558	9.94298e-12	FALSE
Psmb3	0.168864	1	0.146798	1	0.17489	1	0.252306	1	0.318839	1	0.272776	1	-0.0481364	1	-0.208452	1	0.259896	1	0.0992502	1	0.074702	1	0.14793	1	0.33984	1	0.0799044	1	0.183195	1	0.349468	1	0.328206	1	0.247607	1	-0.0997313	1	0.315739	1	0.0136923	1	0.162742	1	FALSE	FALSE	0.267299	6.44919e-57	FALSE
Psmd12	0.228293	1	-0.0671617	1	0.124328	1	0.234255	1	0.135065	1	0.191203	1	0.0380142	1	0.0140826	1	0.258469	1	0.0396815	1	0.0927468	1	0.0846052	1	0.00909632	1	0.0772072	1	0.206195	1	0.266712	1	0.200083	1	0.0391155	1	-0.107194	1	0.159743	1	0.128774	1	0.112063	1	FALSE	FALSE	0.237121	2.12445e-45	FALSE
Ptms	0.399802	1	0.332013	1	0.179272	1	0.38935	1	0.30575	1	-0.0156769	1	0.224066	1	0.14998	1	0.235799	1	0.104464	1	0.176137	1	0.134859	1	0.285966	1	0.279047	1	0.259285	1	-0.252706	1	0.470569	1	0.481803	1	0.135402	1	-0.0335815	1	-0.10353	1	0.197051	1	FALSE	FALSE	0.223202	2.7663e-42	FALSE
Ptpra	0.174665	1	0.0448143	1	-0.0916039	1	-0.101257	1	0.586945	1	0.118656	1	0.0794937	1	0.0618217	1	0.0690713	1	0.0699884	1	0.0760801	1	0.279562	1	0.10218	1	0.226128	1	-0.178065	1	0.30821	1	0.302813	1	0.371125	1	0.349314	1	-0.213157	1	0.174195	1	0.133856	1	FALSE	FALSE	0.229673	2.06893e-05	FALSE
Purb	0.235478	1	0.130803	1	-0.109269	1	-0.0140927	1	-0.00448252	1	-0.0022268	1	-0.0362164	1	0.0127891	1	0.0591265	1	0.0341504	1	0.166254	1	-0.011937	1	0.132716	1	-0.0288582	1	0.11345	1	0.348579	1	0.161489	1	0.105074	1	0.163304	1	0.177294	1	-0.143455	1	0.070951	1	FALSE	FALSE	0.226188	6.62746e-30	FALSE
Rab14	0.0854219	1	0.183297	1	-0.107669	1	0.0761386	1	-0.0902605	1	-0.0363206	1	0.0634541	1	0.136786	1	0.401587	1	0.0520583	1	0.178069	1	0.116936	1	0.0539001	1	0.234533	1	0.157278	1	0.272711	1	0.00779052	1	-0.0836381	1	0.00608955	1	0.0355775	1	0.0530728	1	0.0855625	1	FALSE	FALSE	0.207132	1.54777e-31	FALSE
Rabac1	0.234163	1	0.132151	1	0.120211	1	-0.0965971	1	0.625028	1	0.196726	1	0.0878456	1	0.577393	1	0.267212	1	0.0781151	1	0.176174	1	0.365179	1	0.126833	1	0.0485998	1	0.350646	1	-0.170375	1	0.217714	1	-0.0401968	1	0.252157	1	0.0816998	1	0.196633	1	0.182253	1	FALSE	FALSE	0.233961	2.23833e-25	FALSE
Rbx1	0.35013	1	-0.0245446	1	0.05971	1	0.0681886	1	0.475909	1	0.129314	1	0.113501	1	-0.0351997	1	0.220832	1	0.181039	2.17228e-06	0.119749	1	0.0524085	1	0.289589	1	0.225828	1	0.133381	1	-0.0404246	1	0.120915	1	0.30895	1	0.0472484	1	0.265323	1	0.0682361	1	0.149052	0.974279	FALSE	FALSE	0.214632	1.13337e-41	FALSE
Rfc3	0.158056	1	0.166637	1	-0.0969872	1	0.0548709	1	-0.162408	1	0.0569409	1	0.122669	1	0.203746	1	0.363029	1	0.248747	0.00271402	0.379932	1	0.0608874	1	-0.260942	1	0.401042	1	0.288418	1	0.079808	1	0.125105	1	0.283024	1	-0.0105858	1	0.241315	1	0.240845	1	0.140198	0.999999	FALSE	FALSE	0.296313	1.72903e-27	FALSE
Romo1	0.140865	1	-0.0589057	1	0.0872685	1	0.153049	1	0.198356	1	0.273809	1	0.0885354	1	0.300764	1	0.13831	1	0.0659073	1	0.0792204	1	0.204519	1	0.0473563	1	0.0593619	1	0.171637	1	0.199854	1	0.261132	1	0.167889	1	-0.00875345	1	0.0984467	1	0.0849195	1	0.131121	1	FALSE	FALSE	0.243085	7.4495e-45	FALSE
Rpl22l1	0.0684193	1	0.126735	1	-0.0562688	1	-0.0296917	1	-0.320756	1	-0.0236525	1	-0.0794205	1	0.0989336	1	0.200851	1	-0.317809	6.26344e-37	0.152225	1	-0.036912	1	-0.370362	1	-0.301041	1	0.255493	1	-0.293426	1	-0.360971	1	0.219148	1	0.101256	1	-0.472337	1	-0.0928929	1	-0.0729752	8.85125e-17	FALSE	FALSE	0.220545	1.46694e-58	FALSE
Rpl23	-0.101461	1	0.0961235	1	-0.0764833	1	-0.0153533	1	-0.161063	1	-0.0836693	1	0.0861461	1	0.0192228	1	0.000673269	1	-0.0702449	0.00156276	-0.0179673	1	0.0540103	1	-0.153563	1	-0.0648001	1	-0.0839981	1	-0.176103	1	-0.309329	1	-0.0635366	1	-0.0366155	1	0.0736077	1	0.042035	1	-0.0496366	0.999996	FALSE	FALSE	0.217911	2.66633e-174	FALSE
Rpl35	-0.175884	1	0.250471	1	-0.0599939	1	0.1564	1	0.135916	1	0.208875	1	0.267207	0.0828517	0.23809	1	0.184828	1	0.0622018	0.039194	0.19595	1	0.257803	1	-0.0692358	1	0.250357	1	0.155272	1	0.0758777	1	-0.0353614	1	0.145582	1	0.057628	1	0.223472	1	0.272933	1	0.133257	0.999999	FALSE	FALSE	0.354591	8.0557e-295	FALSE
Rps21	-0.0151708	1	0.187814	1	0.0808581	1	-0.0134614	1	0.127776	1	0.135628	1	0.230574	0.0534372	0.0957161	1	0.0457909	1	0.0449512	1	0.0524692	1	0.157758	1	-0.215778	1	0.0878763	1	0.129873	1	0.120693	1	-0.0959787	1	-0.0274775	1	0.112782	1	0.105619	1	0.287799	1	0.0779101	1	FALSE	FALSE	0.231301	9.28313e-156	FALSE
Rsrp1	0.204671	1	-0.0399932	1	0.316823	1	0.113609	1	-0.444216	1	-0.145528	1	0.0261399	1	-0.0896195	1	-0.221666	1	0.0683182	1	0.227565	1	0.0914861	1	-0.250792	1	-0.268466	1	0.144359	1	0.00335486	1	-0.196803	1	-0.106602	1	0.227919	1	-0.0456007	1	-0.0433163	1	-0.0203981	1	FALSE	FALSE	0.205031	1.57451e-06	FALSE
Rtf1	0.0790154	1	0.316579	1	0.00717349	1	0.169335	1	0.0490875	1	0.250174	1	0.111912	1	0.204657	1	0.149828	1	0.0838406	1	0.0961336	1	0.219584	1	0.113042	1	0.198041	1	0.411578	1	-0.0543522	1	0.394629	1	0.132532	1	0.0689257	1	0.0248522	1	0.141674	1	0.150869	1	FALSE	FALSE	0.260102	5.72006e-29	FALSE
Scand1	0.256635	1	0.0894377	1	0.016228	1	0.0925945	1	0.285542	1	0.0107381	1	0.242044	1	0.300557	1	0.224117	1	0.110424	1	0.115832	1	0.309982	1	-0.0834866	1	0.214486	1	-0.101317	1	0.111452	1	0.298141	1	0.207021	1	0.0153103	1	0.145804	1	0.146738	1	0.143251	1	FALSE	FALSE	0.310021	5.54013e-89	FALSE
Sdc4	0.347664	1	0.446852	1	-0.0234955	1	0.311473	1	-0.0162277	1	0.08424	1	0.304702	1	-0.163636	1	0.273048	1	0.204712	1	0.433289	0.626686	0.224922	1	-0.00288777	1	0.184712	1	0.530681	1	0.245766	1	0.155022	1	0.264517	1	0.0412342	1	-0.112191	1	0.302021	1	0.19221	1	FALSE	FALSE	0.30148	2.08064e-28	FALSE
Serbp1	-0.0581231	1	0.118489	1	0.129758	1	0.365551	1	0.365055	1	0.297851	0.0140408	0.11537	1	0.0913719	1	0.27053	1	0.21355	1.68517e-26	0.140912	1	0.0337573	1	0.184392	1	0.318033	1	0.202291	1	0.204454	1	0.259429	1	0.203873	1	0.0614389	1	0.160347	1	0.262031	1	0.187636	1.65287e-10	FALSE	FALSE	0.200176	2.92548e-75	FALSE
Serf2	0.215492	1	0.240436	1	0.164458	1	0.233833	1	0.122893	1	0.21588	1	0.146313	1	0.174348	1	0.105526	1	0.111829	2.05274e-05	0.160409	1	0.333836	1	0.0938092	1	0.141682	1	0.247884	1	-0.114308	1	0.273701	1	0.0306122	1	0.141947	1	0.143251	1	0.135159	1	0.158047	0.996204	FALSE	FALSE	0.247093	5.13839e-113	FALSE
Serpinb6a	0.177851	1	0.132627	1	-0.244144	1	-0.0988936	1	-0.0508375	1	-0.105315	1	-0.0451354	1	0.313421	1	0.0808383	1	-0.000590615	1	0.0858897	1	0.200439	1	-0.163151	1	0.060799	1	-0.162187	1	-0.287385	1	-0.352191	1	0.449448	1	-0.120066	1	-0.0134325	1	0.083956	1	-0.00276477	1	FALSE	FALSE	0.28711	6.22706e-83	FALSE
Snrpb	0.0209315	1	-0.0474725	1	0.199012	1	-0.243465	1	-0.020097	1	-0.0156273	1	-0.06641	1	-0.170254	1	0.105017	1	0.115827	1	0.0669065	1	0.127082	1	0.244019	1	-0.0330335	1	0.170688	1	0.215488	1	0.00921729	1	0.226238	1	-0.0183294	1	0.0595397	1	-0.0302419	1	0.0435732	1	FALSE	FALSE	0.214758	2.46965e-36	FALSE
Sox4	0.0402063	1	-0.314146	1	0.155187	1	-0.330158	1	-0.400887	1	-0.0362521	1	-0.179854	1	-0.216949	1	0.049303	1	-0.215637	2.96479e-10	0.139914	1	0.06501	1	-0.445781	1	-0.164454	1	0.138144	1	0.178406	1	-0.257567	1	-0.212565	1	-0.0505987	1	-0.667944	1	-0.461404	1	-0.151811	0.391852	FALSE	FALSE	0.213401	3.16809e-11	FALSE
Sptan1	0.071288	1	0.266108	1	0.169649	1	0.0121637	1	-0.0695524	1	0.172777	1	0.259827	1	-0.0740164	1	-0.0517037	1	-0.0179245	1	0.228063	1	0.241016	1	0.0735008	1	0.120796	1	-0.0361807	1	-0.227939	1	0.180296	1	0.513231	1	-0.0290839	1	-0.00820822	1	0.11504	1	0.0909118	1	FALSE	FALSE	0.265355	1.02075e-22	FALSE
Sptbn1	0.439106	1	0.22761	1	-0.0113521	1	0.0119491	1	0.226247	1	0.239318	1	0.364129	1	-0.0280834	1	0.198104	1	-0.0818212	0.0652311	0.165252	1	0.36202	1	0.0184381	1	0.285815	1	0.122745	1	0.254799	1	0.152192	1	0.328856	1	0.184287	1	-0.295059	1	0.202175	1	0.16032	1	FALSE	FALSE	0.345875	9.82507e-79	FALSE
Ssb	0.095722	1	0.260868	1	-0.148345	1	0.117714	1	0.379512	1	0.148462	1	0.189979	1	0.138105	1	0.291524	1	0.175346	1.29318e-09	0.269345	1	0.104966	1	0.309103	1	0.125205	1	0.226207	1	0.287893	1	-0.0676955	1	0.144773	1	-0.00383936	1	0.0119371	1	-0.00601652	1	0.145274	0.517755	FALSE	FALSE	0.270874	2.58996e-90	FALSE
Sub1	0.250656	1	-0.0223493	1	0.016895	1	0.141468	1	0.0534266	1	0.0989304	1	-0.0137587	1	0.11804	1	0.0739425	1	0.177753	0.00029499	0.133198	1	0.258844	1	0.353951	1	0.0993965	1	-0.148616	1	-0.135775	1	0.340321	1	0.435476	1	0.0433676	1	0.108515	1	-0.0487916	1	0.111185	0.999884	FALSE	FALSE	0.209316	1.45744e-34	FALSE
Swi5	0.405645	1	0.228073	1	0.125734	1	-0.0961457	1	0.0846044	1	0.073196	1	0.0638519	1	0.146705	1	0.242855	1	0.181499	1.21652e-09	0.275673	0.917551	0.019179	1	0.292713	1	0.135313	1	0.146216	1	0.0744201	1	0.357313	1	0.0792846	1	0.0242094	1	0.159499	1	0.051027	1	0.146232	0.504776	FALSE	FALSE	0.300233	2.33101e-99	FALSE
Tagln2	0.00978955	1	0.105699	1	0.149069	1	0.0604659	1	0.321115	1	0.0897632	1	0.179399	1	0.0855001	1	0.136195	1	0.267372	1.85431e-19	0.154709	1	0.175053	1	0.110456	1	-0.17524	1	0.14042	1	0.000914474	1	0.299933	1	0.17105	1	-0.165031	1	0.0995813	1	0.116368	1	0.111075	6.83266e-05	FALSE	FALSE	0.267885	9.48781e-66	FALSE
Tbca	0.0201278	1	0.256507	1	-0.00169611	1	-0.106969	1	0.21092	1	0.410823	0.000181264	-0.0145401	1	0.129336	1	-0.0931377	1	0.0946274	1	0.14213	1	0.160629	1	-0.0441184	1	-0.0554942	1	-0.14258	1	0.14989	1	-0.122853	1	0.0305441	1	0.0505335	1	-0.00914699	1	-0.0069444	1	0.050409	0.999749	FALSE	FALSE	0.225177	1.9291e-67	FALSE
Tnrc6a	0.0855479	1	0.059999	1	0.165346	1	0.155782	1	0.481108	1	0.446982	0.0599963	0.160206	1	-0.253909	1	0.103882	1	0.130719	1	0.250735	1	0.237202	1	0.202957	1	0.216312	1	0.106056	1	0.0896964	1	0.227946	1	0.442508	1	0.0980719	1	0.117978	1	0.00439847	1	0.168073	1	FALSE	FALSE	0.202244	2.7332e-08	FALSE
Tpd52l2	0.122176	1	0.0313147	1	0.168046	1	-0.100729	1	0.15296	1	-0.00557752	1	-0.00721252	1	0.0980109	1	0.223595	1	0.104772	1	0.169947	1	0.0940847	1	0.152093	1	0.297174	1	0.133308	1	-0.0269853	1	0.229175	1	-0.0101121	1	0.125156	1	0.244482	1	0.0706911	1	0.107922	1	FALSE	FALSE	0.236461	1.82708e-16	FALSE
Tuba1a	0.656159	0.824691	-0.124366	1	0.199298	1	-0.112785	1	0.26792	1	-0.0519527	1	0.063591	1	0.342198	1	0.278198	1	0.0574843	1	0.166843	1	0.218374	1	-0.168132	1	-0.16142	1	0.070726	1	0.1304	1	0.288017	1	0.248937	1	-0.161853	1	-0.365932	1	0.0225029	1	0.0887718	1	FALSE	FALSE	0.30022	4.88486e-54	FALSE
Tuba1b	0.0197744	1	-0.00521919	1	0.239323	1	0.46272	0.629655	0.250684	1	0.0860806	1	0.0790779	1	0.0246332	1	0.143858	1	0.197748	1.09265e-10	0.192106	1	0.253424	1	0.133894	1	0.225001	1	0.12926	1	0.358127	1	0.341055	1	0.259123	1	0.1745	1	0.0685486	1	0.048713	1	0.175354	0.281928	FALSE	FALSE	0.230606	1.18302e-56	FALSE
Tuba4a	0.32304	1	0.0114683	1	-0.0585201	1	-0.146347	1	-0.536818	1	0.00943119	1	0.107743	1	0.17939	1	0.0938789	1	0.040138	1	0.152417	1	-0.0292353	1	0.0402154	1	0.144121	1	-0.279423	1	-0.149779	1	-0.139277	1	0.257899	1	0.121012	1	0.218279	1	0.219814	1	0.0275927	1	FALSE	FALSE	0.208704	1.91525e-05	FALSE
Tubb4b	0.244818	1	0.0347126	1	0.00197747	1	0.160135	1	0.0925252	1	-0.0851301	1	0.254956	1	-0.127572	1	0.385592	1	0.152915	0.0536042	0.212146	1	0.0454964	1	0.633633	1	0.0368927	1	0.238573	1	-0.0140928	1	0.338943	1	0.327433	1	-0.169684	1	0.0989889	1	0.0254417	1	0.137557	1	FALSE	FALSE	0.274788	6.23086e-51	FALSE
Uap1l1	0.308804	1	-0.0745956	1	0.226117	1	0.242369	1	0.246438	1	0.0600519	1	0.156661	1	0.35104	1	0.181643	1	0.103192	1	0.105235	1	0.0299866	1	0.0494074	1	0.0929474	1	0.216908	1	0.14856	1	0.169438	1	0.324854	1	0.281022	1	0.141629	1	0.18125	1	0.168712	1	FALSE	FALSE	0.217381	4.48163e-16	FALSE
Vat1	0.0339546	1	0.25301	1	-0.0873102	1	0.0666073	1	0.103683	1	0.0723917	1	0.116719	1	-0.0070628	1	0.248624	1	-0.0561105	1.67654e-10	0.0809761	1	0.133551	1	-0.00704232	1	0.045711	1	0.0512537	1	-0.30814	1	-0.170867	1	0.294431	1	0.257529	1	0.0398743	1	0.14001	1	0.0619902	0.346739	FALSE	FALSE	0.209309	0.0456448	FALSE
Vim	0.273912	1	0.309927	1	0.207753	1	0.200075	1	-0.0576805	1	-0.0066717	1	0.436362	1.24891e-06	-0.211354	1	0.156265	1	0.0834818	0.45063	0.142323	1	0.374895	0.152773	0.0316699	1	0.19844	1	-0.0892153	1	-0.0365594	1	-0.0228083	1	0.0703356	1	0.398493	1	-0.200763	1	0.152112	1	0.114809	0.852614	FALSE	FALSE	0.329294	8.2215e-152	FALSE
Vps28	0.162551	1	-0.168026	1	0.285815	1	0.0106409	1	0.224001	1	0.0825041	1	0.164151	1	0.142491	1	0.0476042	1	0.180956	1	0.104292	1	0.18157	1	-0.070952	1	0.227729	1	-0.148602	1	0.313794	1	0.121548	1	0.387637	1	0.0982488	1	0.295671	1	0.258903	1	0.138216	1	FALSE	FALSE	0.238407	2.04635e-07	FALSE
Wfdc2	0.00503497	1	-0.154727	1	-0.278538	1	-0.604789	1	0.656988	1	0.0478526	1	-0.339963	1	0.565375	1	0.0158159	1	-0.198163	3.14773e-06	0.217717	1	-0.258816	1	-0.225668	1	0.00727001	1	0.991581	1	0.0754001	1	-0.540466	1	-0.180315	1	0.0901941	1	-0.236344	1	-0.0438195	1	-0.0184944	0.980333	FALSE	FALSE	0.335193	2.22292e-29	FALSE
Xlr	0.394862	1	-0.032803	1	-0.343181	1	-0.0509828	1	0.437662	1	0.167106	1	0.0128067	1	0.395365	1	0.289768	1	0.1404	1	0.126919	1	0.164144	1	-0.0440061	1	0.270563	1	0.0174573	1	-0.0535892	1	0.198556	1	0.282455	1	-0.0910162	1	0.0374218	1	0.204814	1	0.120225	1	FALSE	FALSE	0.238032	8.22431e-11	FALSE
Xrn2	-0.0786181	1	0.221133	1	0.0170373	1	0.265483	1	0.198378	1	0.249389	1	0.294506	1	0.215397	1	0.330414	1	0.0794999	1	0.109051	1	0.0871321	1	-0.065517	1	0.186772	1	0.0949204	1	0.628736	1	-0.0737144	1	0.607181	1	0.178106	1	0.0939517	1	0.116412	1	0.17884	1	FALSE	FALSE	0.298197	2.58967e-85	FALSE
Ywhaz	0.081937	1	0.135848	1	0.260719	1	0.0341166	1	0.114692	1	0.284121	1	0.0906822	1	0.282164	1	0.110046	1	0.128794	1	0.241392	1	-0.0126747	1	0.064018	1	0.38703	1	0.173431	1	0.0032214	1	0.226641	1	0.253405	1	0.263368	1	0.0786968	1	0.0693309	1	0.155761	1	FALSE	FALSE	0.20081	1.19982e-31	FALSE
Zbp1	0.272938	1	0.0963219	1	0.274448	1	0.0726002	1	0.158812	1	0.0968045	1	0.173452	1	0.382617	1	0.24701	1	0.132512	1	0.150215	1	0.0267235	1	-0.0347524	1	0.220469	1	0.368559	1	0.201514	1	-0.0739089	1	0.589502	1	0.407449	1	0.193014	1	0.211338	1	0.198459	1	FALSE	FALSE	0.262263	1.29188e-21	FALSE
1810037I17Rik	-0.144179	1	0.134382	1	-0.284453	1	-0.348108	1	-0.131879	1	-0.279836	0.872168	-0.296905	1	-0.296129	1	-0.547339	0.0202524	-0.253411	8.40548e-32	-0.0841132	1	-0.211091	1	-0.160731	1	-0.0912837	1	-0.31835	1	-0.424901	1	-0.201658	1	-0.421187	1	-0.17336	1	-0.168237	1	-0.500182	1	-0.24776	3.05918e-14	TRUE	FALSE	-0.348908	3.57996e-190	TRUE
Actg1	-0.0197793	1	-0.351526	1	-0.161168	1	-0.180894	1	-0.196882	1	-0.171576	1	-0.119073	1	-0.688669	0.0136825	-0.320595	1	-0.208879	4.3901e-16	-0.478789	4.16245e-05	-0.294578	1	-0.373803	1	-0.479972	0.0321769	-0.368825	1	-0.322981	1	-0.51567	1	-0.631921	1	-0.228356	1	-0.35159	1	-0.318612	1	-0.323054	1.70447e-07	TRUE	FALSE	-0.460973	6.96175e-259	TRUE
Akt1	-0.0156127	1	-0.0930279	1	-0.379277	1	-0.507104	1	0.342947	1	-0.263748	0.660733	-0.235377	1	-0.564015	1	-0.374778	1	-0.203073	9.80399e-26	-0.253827	0.690306	-0.277962	1	-0.238686	1	-0.235722	1	-0.169167	1	-0.102079	1	0.0380303	1	-0.373724	1	-0.0848148	1	-0.144394	1	-0.250131	1	-0.208835	5.8184e-09	TRUE	FALSE	-0.261383	1.21649e-136	TRUE
Asns	-0.842954	0.0067382	-0.11239	1	0.0355567	1	-0.0681606	1	-0.251467	1	-0.591008	4.85966e-07	-0.263478	0.163739	-0.369457	1	-0.251899	1	-0.126877	7.03138e-16	-0.430001	1.28311e-05	-0.0901836	1	-0.157682	1	-0.166665	1	-0.246962	1	-0.0317188	1	-0.0304677	1	-0.164982	1	-0.4129	1	-0.240204	1	-0.33289	1	-0.245085	1.08066e-11	TRUE	FALSE	-0.217168	5.49049e-107	TRUE
Atf5	-0.464319	1	0.106014	1	-0.186024	1	-0.381715	1	-0.305087	1	-0.76909	2.14657e-09	-0.295835	0.285826	0.106556	1	-0.274995	1	-0.163625	5.20195e-19	-0.323485	1	-0.254339	1	-0.18591	1	-0.0809766	1	-0.252107	1	-0.544146	1	-0.325179	1	-0.177182	1	-0.014099	1	-0.100569	1	-0.165322	1	-0.240545	2.033e-10	TRUE	FALSE	-0.21556	5.31021e-92	TRUE
Eef1b2	-0.346732	1	0.0439307	1	-0.0723953	1	-0.316902	1	-0.256544	1	-0.363359	3.98637e-09	-0.072339	1	-0.109429	1	-0.162136	1	-0.215346	1.27046e-37	-0.227827	0.074428	-0.158491	1	-0.396413	1	-0.373855	2.58182e-05	-0.286471	0.471236	-0.331236	1	-0.352117	1	-0.204169	1	-0.128167	1	-0.100434	1	-0.0835321	1	-0.214951	6.42868e-29	TRUE	FALSE	-0.253315	2.1049e-204	TRUE
Egln1	0.174191	1	0.110816	1	-0.304263	1	-0.235135	1	-1.0106	0.34321	-0.19125	1	0.141241	1	-0.346247	1	0.00891327	1	-0.141976	1.25321e-12	-0.290023	1	-0.156845	1	-0.215238	1	-0.549056	0.0229848	-0.444911	1	-0.563868	1	0.114142	1	-0.483952	1	-0.0497777	1	-0.553812	1	-0.447487	1	-0.258816	0.0143802	TRUE	FALSE	-0.238439	8.99531e-87	TRUE
Eif4h	-0.234018	1	-0.249787	1	-0.161104	1	-0.367364	1	-0.229003	1	-0.326299	0.0236476	-0.217687	1	-0.384465	1	-0.340047	1	-0.177716	1.29707e-18	-0.252981	0.259271	-0.318734	1	0.186865	1	-0.325203	1	-0.146965	1	-0.136155	1	-0.262601	1	-0.29627	1	-0.206188	1	-0.244255	1	-0.1349	1	-0.229756	1.14048e-05	TRUE	FALSE	-0.245179	2.13128e-119	TRUE
Ercc1	-0.389813	1	-0.242421	1	-0.236826	1	-0.393825	1	-0.0625604	1	-0.225805	1	-0.218848	1	-0.434779	1	-0.221471	1	-0.183177	4.28087e-30	-0.357145	0.000653223	-0.346861	1	-0.246305	1	-0.147476	1	0.071257	1	-0.175345	1	-0.185393	1	-0.646277	1	-0.138451	1	-0.20969	1	-0.125046	1	-0.243631	4.88388e-14	TRUE	FALSE	-0.405468	1.26009e-279	TRUE
Gm10260	-0.450362	1	-0.394653	1	-0.385736	1	-0.533629	1	-0.521764	1	-0.738651	1.24583e-22	-0.348255	0.015433	-0.375839	1	-0.568949	1.04553e-05	-0.328102	7.93469e-59	-0.530303	1.25361e-14	-0.35638	1	-0.641313	0.00108216	-0.667138	4.52893e-13	-0.397632	0.228336	-0.458091	1	-0.578368	0.00156605	-0.468724	0.513517	-0.338482	1	-0.341501	1	-0.223715	1	-0.459409	5.14114e-90	TRUE	FALSE	-0.501852	0	TRUE
Hnrnpf	-0.0946992	1	-0.399777	1	-0.488568	1	-0.0898488	1	-0.392548	1	-0.450204	5.82414e-10	-0.268065	1	-0.578273	0.203303	-0.367578	1	-0.288774	3.86954e-46	-0.224705	1	-0.49341	0.0196061	-0.263999	1	-0.322784	1	-0.1969	1	-0.000150638	1	-0.145538	1	-0.128397	1	-0.262937	1	-0.360406	1	-0.263708	1	-0.289584	1.01685e-33	TRUE	FALSE	-0.268438	1.16418e-127	TRUE
Hspa1b	-0.244176	1	-0.0859321	1	-1.05564	1	-0.427322	1	-0.163878	1	-0.248971	1	-0.141483	1	-0.294435	1	-0.716951	1	-0.157045	5.82063e-17	-0.591926	0.1234	0.023611	1	-0.176344	1	-0.24917	0.0711831	-0.321851	1	-0.478914	1	-0.665388	0.50398	-0.201484	1	-0.149992	1	-0.391287	1	-0.468248	1	-0.343182	8.19406e-05	TRUE	FALSE	-0.201345	4.11605e-72	TRUE
Lix1l	0.0635521	1	-0.299856	1	-0.305927	1	-0.077904	1	-0.398653	1	-0.149697	0.811012	-0.224791	1	-0.189358	1	-0.110295	1	-0.170578	1.83899e-33	-0.102675	1	-0.242913	1	-0.257859	1	-0.191627	1	-0.363781	0.30313	-0.359474	1	-0.185238	1	0.0254474	1	-0.0160127	1	-0.419094	1	-0.275922	1	-0.202507	1.26609e-14	TRUE	FALSE	-0.203389	2.75343e-144	TRUE
Mthfd2	-0.935355	0.024968	-0.118982	1	-0.442752	1	-0.173805	1	-0.206671	1	-0.451668	0.000430734	-0.321264	1	-0.505238	1	-0.331576	1	-0.123252	3.40427e-12	-0.320235	0.318263	-0.0428647	1	0.0270674	1	-0.140551	1	-0.488893	1	-0.627553	1	-0.0979885	1	-0.313691	1	-0.34075	1	-0.0741879	1	-0.240717	1	-0.298616	0.000619638	TRUE	FALSE	-0.309606	2.08351e-134	TRUE
Plaur	-0.127546	1	-0.286167	1	-0.305977	1	-0.215992	1	-0.565298	1	-0.633235	1.26064e-15	-0.38335	0.00120885	0.058137	1	-0.56011	0.000287891	-0.300379	2.29579e-51	-0.216957	1	-0.306736	1	-0.214275	1	-0.216049	1	-0.511506	0.00786979	-0.158804	1	-0.527591	1	-0.125143	1	-0.0626281	1	-0.279787	1	-0.146066	1	-0.289784	1.61256e-48	TRUE	FALSE	-0.264703	7.9998e-170	TRUE
Plod2	-0.0386436	1	0.21579	1	-0.507403	1	0.113928	1	-0.444457	1	-0.142768	1	-0.00719438	1	-0.225704	1	-0.0912896	1	-0.115695	1.12575e-19	-0.324449	0.153518	-0.269168	1	-0.202387	1	-0.188732	1	-0.314291	1	-0.821089	0.0161695	-0.40483	0.224381	-0.353742	1	-0.137749	1	0.115707	1	-0.0629206	1	-0.200337	6.18065e-07	TRUE	FALSE	-0.304101	7.63218e-186	TRUE
Rpl21	-0.206147	1	-0.30471	1	-0.195283	1	-0.339876	1	-1.02192	3.98651e-05	-0.812435	3.76825e-34	-0.0358035	1	-0.24594	1	-0.337898	0.312761	-0.0970392	4.93525e-07	-0.244397	0.000509472	-0.297869	1	-0.203319	1	-0.443427	5.87688e-09	-0.263596	1	0.0213653	1	-0.317501	1	-0.344634	1	-0.212866	1	0.0966323	1	-0.0824364	1	-0.280433	5.75808e-33	TRUE	FALSE	-0.254004	1.72849e-199	TRUE
Rpl3	-0.251412	1	-0.0883826	1	-0.0775635	1	-0.268431	1	-0.329127	1	-0.411845	1.73802e-10	-0.115902	1	-0.323493	1	-0.336645	0.594242	-0.147512	9.52124e-21	-0.297637	8.14132e-05	-0.22125	1	-0.218761	1	-0.350417	0.000608191	-0.324973	0.169172	-0.133639	1	-0.447484	0.314588	-0.178383	1	-0.151371	1	-0.00825333	1	-0.0870171	1	-0.227119	1.28648e-18	TRUE	FALSE	-0.200297	4.98251e-132	TRUE
Rpl9	-0.153433	1	-0.262793	1	-0.266029	1	-0.421206	1	-0.808659	0.0714735	-0.527193	2.31976e-18	-0.180181	1	-0.225598	1	-0.456192	0.00296511	-0.223784	9.86418e-44	-0.413604	4.58743e-10	-0.202631	1	-0.423336	0.629634	-0.537465	2.11428e-10	-0.349338	0.0269017	-0.217912	1	-0.482914	0.314588	-0.193383	1	-0.15797	1	-0.127555	1	-0.192919	1	-0.324957	8.97404e-59	TRUE	FALSE	-0.230071	1.12786e-150	TRUE
Rplp0	-0.254446	1	-0.130567	1	-0.227995	1	-0.313412	1	-0.553844	0.0714735	-0.303598	3.07558e-08	-0.129713	1	-0.201091	1	-0.275994	1	-0.0898524	0.00105929	-0.235427	0.0061232	-0.186938	1	-0.194485	1	-0.320113	0.000126384	-0.230096	0.15874	-0.304075	1	-0.247132	1	-0.249886	1	-0.157634	1	-0.0529304	1	-0.111332	1	-0.22717	8.67872e-05	TRUE	FALSE	-0.252205	3.07085e-221	TRUE
Rps18	-0.450335	0.132333	-0.0693518	1	-0.314423	1	-0.232161	1	-0.311503	1	-0.531994	8.63005e-17	-0.344609	1.81459e-05	-0.315139	1	-0.164287	1	-0.237617	1.08656e-49	-0.286267	3.11696e-05	-0.266015	1	-0.323827	1	-0.348814	3.92321e-05	-0.363452	0.048951	-0.291236	1	-0.418479	0.0346618	-0.353052	0.995122	-0.0537532	1	-0.199923	1	-0.111158	1	-0.285114	7.67581e-56	TRUE	FALSE	-0.372003	0	TRUE
Rps2	-0.578762	0.00983158	-0.204538	1	-0.398097	1	-0.479763	0.246008	-0.256631	1	-0.581056	2.3889e-19	-0.446149	3.45496e-12	-0.594853	0.992466	-0.384902	0.0108458	-0.261982	1.26581e-44	-0.61378	6.38985e-20	-0.398351	0.31821	-0.248434	1	-0.503367	1.94376e-07	-0.444267	0.0175657	-0.386523	1	-0.614109	0.00329736	-0.459942	0.13238	-0.206762	1	-0.233666	1	-0.232187	1	-0.406101	4.40824e-81	TRUE	FALSE	-0.559904	0	TRUE
Rps7	-0.302646	1	-0.124617	1	-0.389291	1	-0.245493	1	-0.205955	1	-0.430032	1.79381e-13	-0.220741	1	-0.493739	0.0753872	-0.311908	1	-0.275065	2.90126e-60	-0.368962	1.72079e-08	-0.21352	1	-0.475864	0.0268244	-0.389644	2.90914e-06	-0.299027	0.0284818	-0.485215	1	-0.330892	1	-0.434057	0.513517	-0.157763	1	-0.0941686	1	0.0147122	1	-0.296852	7.66541e-63	TRUE	FALSE	-0.290394	1.5822e-245	TRUE
Serpinh1	-0.268792	1	-0.577248	1	-0.200316	1	-0.437564	1	-0.38285	1	-0.598287	9.81095e-09	-0.327275	0.0522195	-0.395215	1	-0.284197	1	-0.18921	3.39311e-14	-0.476324	6.36318e-07	-0.202758	1	-0.157473	1	-0.312538	1	-0.401357	1	0.03782	1	-0.14697	1	-0.156631	1	-0.173854	1	-0.336001	1	-0.444191	1	-0.306249	1.94072e-11	TRUE	FALSE	-0.272163	5.4705e-110	TRUE
Snrpf	-0.126579	1	-0.181958	1	-0.0568268	1	-0.573893	1	-0.653748	1	-0.495704	5.69115e-10	-0.371388	0.00123702	-0.344885	1	-0.438732	0.282025	-0.295521	3.53123e-45	-0.336237	0.000771732	-0.426213	0.106252	-0.232968	1	-0.467712	0.00189824	-0.443044	0.312929	-0.372138	1	-0.432359	1	-0.111918	1	-0.0961417	1	-0.239353	1	-0.547949	0.045028	-0.345013	2.96681e-41	TRUE	FALSE	-0.333835	1.62845e-190	TRUE
Srsf9	-0.0124681	1	-0.431726	1	-0.0291903	1	-0.619749	0.831064	-0.659612	1	-0.410754	1.06381e-05	-0.155643	1	-0.347992	1	-0.344983	1	-0.12158	5.88003e-09	-0.104198	1	-0.424098	0.773247	-0.0482881	1	-0.476195	0.000613181	-0.311693	1	0.0970349	1	-0.069932	1	-0.0985602	1	-0.277715	1	-0.560245	1	-0.568829	0.0388722	-0.284591	0.000167412	TRUE	FALSE	-0.223777	5.47626e-97	TRUE
Tmed2	-0.0552767	1	-0.372134	1	-0.179533	1	-0.231088	1	-0.667393	1	-0.5144	1.3043e-08	-0.16908	1	-0.462532	1	-0.37241	1	-0.213817	3.42253e-24	-0.215246	1	-0.172966	1	-0.0950218	1	-0.396416	0.163166	-0.0827505	1	-0.0777753	1	-0.372412	1	-0.180403	1	-0.217729	1	-0.166456	1	-0.138846	1	-0.254937	9.88175e-14	TRUE	FALSE	-0.234206	1.78092e-108	TRUE
Tmem128	0.182339	1	-0.030834	1	-0.316847	1	-0.469877	0.177762	-0.299742	1	-0.272114	0.00263079	-0.189166	1	-0.172333	1	-0.188472	1	-0.161383	5.02239e-30	-0.134981	1	-0.238441	1	-0.023003	1	-0.364542	1.0058e-05	-0.0543696	1	-0.227443	1	-0.108456	1	-0.431465	1	-0.0498093	1	-0.287708	1	-0.366194	0.225127	-0.20023	2.24947e-18	TRUE	FALSE	-0.210413	4.885e-163	TRUE
Tnfrsf12a	-0.278087	1	-0.102733	1	-0.191921	1	-0.298282	1	-0.163229	1	-0.333156	0.0354605	-0.186639	1	-0.464799	1	-0.328904	1	-0.199119	2.74677e-13	-0.165883	1	-0.432311	1	0.042993	1	-0.139708	1	-0.430967	1	-0.241257	1	0.0259914	1	-0.638705	1	-0.257639	1	-0.135874	1	-0.383846	1	-0.252575	0.0142911	TRUE	FALSE	-0.368456	4.11631e-148	TRUE
1110004F10Rik	0.12254	1	0.188738	1	0.161055	1	0.534343	1	0.493093	1	0.381681	0.131522	0.142845	1	0.0165026	1	0.140504	1	0.262824	2.41622e-20	0.282501	1	0.178368	1	0.176723	1	0.339759	1	0.359001	1	0.204022	1	0.282559	1	0.144957	1	0.0928552	1	0.0881345	1	0.132048	1	0.225003	6.66021e-06	FALSE	TRUE	0.232142	5.76797e-49	FALSE
Apoe	-0.0445333	1	0.70286	0.0588225	0.698602	1	1.17888	1	0.883894	1	0.884653	2.05322e-10	0.992963	0.000508892	0.308527	1	1.16409	0.0711751	0.683648	4.8678e-43	0.680876	0.00539573	0.512612	0.0811	0.534278	1	0.901904	0.000360336	1.37194	0.00534568	0.523177	1	0.650988	1	0.602038	1	0.537029	1	0.700303	1	0.754954	1	0.724937	4.57935e-42	FALSE	TRUE	0.682132	8.55493e-179	FALSE
B2m	0.89524	0.000481639	0.824253	0.00185748	0.183727	1	0.585584	0.601412	0.463807	1	0.659922	7.8741e-16	0.755466	6.63259e-15	0.918352	6.03447e-05	0.55295	0.0117628	0.462639	1.09198e-84	0.762415	3.00028e-19	0.706471	1.55815e-05	0.499149	1	0.367978	0.822654	0.606644	0.000762357	0.306123	1	0.555417	1	0.518006	0.556242	0.791443	3.01839e-07	0.394712	1	0.652335	0.000837236	0.593459	1.0665e-129	FALSE	TRUE	0.64875	0	FALSE
C1qa	0.27566	1	0.139122	1	0.360095	1	0.529211	1	0.553263	1	0.44142	1	0.732019	1	0.126471	1	0.832536	1	0.365436	5.54396e-16	0.381552	1	0.295417	1	0.3238	1	0.347296	1	0.726483	0.483121	0.325431	1	0.219801	1	0.0849121	1	0.37144	1	0.103773	1	0.247186	1	0.370587	0.00288584	FALSE	TRUE	0.352056	3.76734e-53	FALSE
C1qb	0.0437073	1	0.322506	1	0.241641	1	0.372938	1	0.0930525	1	0.267539	1	0.36006	1	0.540778	0.10569	0.518647	1	0.318316	4.01381e-16	0.328418	1	0.173937	1	0.177186	1	0.32292	1	0.479679	1	0.374005	1	0.240777	1	0.485597	1	0.318979	1	0.113868	1	0.297122	1	0.304365	0.00118567	FALSE	TRUE	0.294402	3.33327e-46	FALSE
Cavin3	0.615939	1	0.321033	1	0.355821	1	0.115957	1	0.132408	1	0.0162663	1	0.540424	0.0700714	0.242825	1	0.371453	1	0.311205	6.3765e-09	0.554146	4.33175e-05	0.331619	1	0.184349	1	0.21173	1	0.277274	1	0.507585	1	0.363104	1	0.185609	1	0.409411	1	0.0697833	1	0.191774	1	0.300463	0.0189724	FALSE	TRUE	0.421264	1.7507e-90	FALSE
Cd74	0.332667	1	0.734487	0.000883379	0.71408	1	0.739674	0.0294733	0.52262	1	0.664825	0.000133501	1.21734	1.78351e-10	0.991823	1	1.21429	0.0164701	0.715751	4.59357e-74	0.623444	1.12752e-05	0.726003	1.20103e-05	0.666707	0.685941	0.879308	8.05885e-05	1.71225	0.0967608	0.632688	1	0.700372	1	0.701119	1	0.47745	1	0.594065	0.362235	0.435854	1	0.761753	5.31596e-80	FALSE	TRUE	0.694888	4.45471e-260	FALSE
Cp	0.404691	1	0.671936	1	0.403417	1	0.4649	1	0.44563	1	0.782293	1.89908e-05	0.326678	1	1.58544	0.000432244	0.329076	1	0.334504	7.52265e-05	0.953826	0.00248856	0.865073	0.0163947	0.61658	1	0.705518	0.138656	1.38475	3.52201e-05	0.51297	1	0.406254	1	0.509217	1	0.62795	1	0.224231	1	1.31072	0.00891261	0.660269	4.75383e-08	FALSE	TRUE	0.765269	9.49035e-201	FALSE
Cst3	0.942745	1	0.684825	1	0.755512	1	0.57692	1	0.104132	1	0.430559	1	0.482552	0.00284737	0.652153	1	0.400907	1	0.435713	2.47546e-48	0.518616	0.0158783	0.50304	0.00286615	0.412159	1	0.618443	0.00111321	0.730959	1	0.52621	1	0.545784	1	0.233014	1	0.389321	1	0.560113	1	0.293477	1	0.51415	4.64375e-34	FALSE	TRUE	0.431762	2.27626e-165	FALSE
Ctss	0.192653	1	0.188201	1	0.313871	1	0.458243	1	0.0778364	1	0.267888	1	0.641497	0.154089	0.355602	1	0.41251	1	0.257905	1.09177e-11	0.379067	0.0248669	0.224814	1	-0.00165493	1	0.401874	1	0.508798	1	0.393445	1	0.259533	1	0.483683	1	0.238676	1	0.261485	1	0.353408	1	0.317587	0.0258358	FALSE	TRUE	0.305739	3.9762e-58	FALSE
Cxcl1	0.377805	1	0.263666	1	0.301148	1	0.139455	1	0.93082	1	0.000437678	1	0.390831	1	-0.210028	1	0.0204976	1	0.646743	7.49284e-14	0.610421	1	0.68043	1	-0.0216921	1	0.506665	1	1.04767	1	-0.170089	1	0.370716	1	0.212613	1	0.0679985	1	-0.172506	1	0.35548	1	0.302337	0.0324123	FALSE	TRUE	0.580933	3.12893e-28	FALSE
Cxcl2	0.136639	1	0.320113	1	0.550772	1	0.643732	1	0.448522	1	0.298465	1	0.441058	1	0.521634	1	0.364415	1	0.397331	4.07879e-24	0.152624	1	0.0927115	1	0.249958	1	0.342595	1	0.302412	1	-0.00985821	1	0.0847568	1	0.498745	1	0.563027	1	0.295467	1	0.00471229	1	0.31904	1.10615e-07	FALSE	TRUE	0.394792	3.16149e-73	FALSE
Dstn	0.205582	1	0.482474	1	0.140925	1	-0.0367887	1	0.934027	0.0807475	0.724362	8.37831e-11	0.283826	1	0.305975	1	0.453234	1	0.200943	2.15303e-08	0.0808011	1	0.252524	1	0.178381	1	0.348576	1	0.43753	1	0.263384	1	0.163649	1	0.302022	1	0.0941313	1	0.514024	1	0.250332	1	0.313329	5.97584e-05	FALSE	TRUE	0.302355	8.41511e-80	FALSE
Fcer1g	0.52265	1	-0.248071	1	0.501026	1	0.831092	1	0.397085	1	0.475644	1	-0.00403263	1	0.542407	1	-0.231171	1	0.307538	2.56746e-13	0.360579	1	0.994202	1	0.53822	1	1.30628	1.63711e-13	0.272811	1	-0.146199	1	0.284968	1	-0.103623	1	0.502743	1	0.627241	1	0.34521	1	0.3846	5.58342e-09	FALSE	TRUE	0.831257	5.63034e-111	FALSE
Fth1	0.0686013	1	0.316329	1	0.243254	1	0.2375	1	0.21986	1	0.0106911	1	0.153957	1	0.577509	0.154764	0.319765	1	0.152201	8.97961e-07	0.404861	7.27042e-06	0.270496	0.441677	0.395661	1	0.313388	0.80537	0.520553	0.617888	0.187472	1	0.26036	1	0.281762	1	0.124533	1	0.403153	1	0.30469	1	0.2746	0.0486766	FALSE	TRUE	0.228456	5.2315e-49	FALSE
Fxyd5	0.905012	0.00115523	0.41426	1	0.367035	1	0.458346	1	-0.00723682	1	0.118366	1	1.07164	4.46779e-13	0.421229	1	0.559464	1	0.180759	1	0.312882	1	0.307257	1	0.318539	1	0.410749	1	1.13131	0.000106279	0.141711	1	-0.213126	1	0.216136	1	0.0147549	1	0.504508	1	0.358436	1	0.380573	3.45581e-05	FALSE	TRUE	0.246562	5.50984e-18	FALSE
H2-Ab1	0.143991	1	0.563054	1	0.296961	1	0.511711	1	0.195472	1	0.279269	1	0.532673	0.775142	0.0703229	1	0.572477	1	0.292525	3.0875e-24	0.384248	0.017439	0.125364	1	0.184017	1	0.390674	1	0.745386	1	0.0166736	1	0.161524	1	0.44794	1	0.262204	1	0.418442	0.382423	0.230693	1	0.32503	2.92223e-09	FALSE	TRUE	0.306092	1.28464e-96	FALSE
H2-D1	0.853033	0.0056183	1.02673	0.0170383	0.403688	1	0.824865	0.0812378	0.357066	1	0.412952	6.32708e-06	0.698618	4.1617e-11	0.998467	0.00162737	0.43954	0.610783	0.633012	1.1261e-97	0.903757	1.21659e-18	0.727483	1.35938e-05	0.784604	0.0035413	0.291896	1	0.582925	0.00699302	0.750659	1	0.621677	1	0.578998	1	0.791454	3.19684e-05	0.705791	1	0.419236	1	0.65745	1.0654e-120	FALSE	TRUE	0.478662	1.61844e-236	FALSE
H2-Eb1	0.195463	1	0.0867661	1	0.247735	1	0.222192	1	-0.00559091	1	0.151156	1	0.454207	0.000512909	0.271752	1	0.552204	1	0.28601	2.59006e-25	0.165248	1	0.117359	1	0.227172	1	0.34087	1	0.556745	1	0.119813	1	0.0672852	1	0.623674	0.152793	0.203439	1	0.13855	1	0.321391	1	0.25445	2.97696e-11	FALSE	TRUE	0.266005	2.02926e-87	FALSE
H2-K1	0.945198	0.000832948	0.871796	1	0.404849	1	0.884576	0.226124	0.48067	1	0.393982	0.00242005	0.782279	7.00119e-12	0.748113	1	0.569997	0.0626363	0.616609	8.77161e-89	0.828262	6.48027e-16	0.881409	8.94944e-07	0.716666	0.0262469	0.358478	1	0.72373	0.0326434	0.718727	1	0.766753	1	0.840759	1	0.757717	3.03866e-05	0.583256	1	0.713032	0.0743569	0.694612	7.87906e-106	FALSE	TRUE	0.447978	1.35303e-194	FALSE
H2-Q4	0.450204	1	0.400223	1	0.0648807	1	0.669861	1	0.175625	1	0.401574	1	0.664731	0.00182483	0.513863	1	0.264764	1	0.35221	1.19004e-18	0.532245	5.56219e-05	0.407188	1	0.664175	1	0.439948	1	0.850703	0.600286	0.493081	1	0.441053	1	0.580599	1	0.495931	1	0.382914	1	0.458267	1	0.462097	8.02148e-09	FALSE	TRUE	0.360452	2.35388e-51	FALSE
Ifitm3	0.982893	0.00205089	0.137032	1	0.249403	1	0.303251	1	0.743289	1	0.748538	5.46726e-09	0.283651	1	0.446578	1	0.482859	1	0.385346	3.33951e-36	0.479171	0.000354532	0.124183	1	0.267764	1	0.704533	3.42151e-05	0.284907	1	0.850196	1	0.525597	1	0.63069	1	0.529529	0.268494	0.440637	1	0.243692	1	0.46875	6.48711e-32	FALSE	TRUE	0.412617	2.0703e-155	FALSE
Igfbp6	0.739704	1	0.518061	1	0.676282	1	0.496541	1	0.749679	1	0.28117	1	0.108043	1	0.807848	1	0.288526	1	0.559983	7.46353e-26	0.398732	1	0.620996	0.715133	0.657637	1	0.521242	1	0.0651447	1	0.784118	1	0.435785	1	0.298128	1	0.242997	1	0.712169	1	0.403926	1	0.493653	6.54529e-09	FALSE	TRUE	0.717295	8.70184e-76	FALSE
Lgals3	0.696115	1	0.900845	1	0.130935	1	0.499327	1	0.280897	1	0.0465538	1	0.733212	1.70715e-06	0.815755	1	0.715391	1	0.524202	3.73184e-44	0.50471	0.0523657	0.572265	1	0.0389463	1	0.810203	0.0592228	0.271646	1	-0.0558346	1	-0.0266675	1	0.99059	1	0.742057	1	0.602562	1	0.331399	1	0.482148	3.18756e-29	FALSE	TRUE	0.795504	0	FALSE
Ly6e	1.098	0.00874767	0.626438	1	0.278258	1	0.484633	1	0.256409	1	0.633499	0.00194715	0.153486	1	0.426015	1	0.247463	1	0.454477	2.74052e-35	0.429192	1	0.145738	1	0.397048	1	0.667244	1	0.423822	1	0.702219	1	0.491934	1	0.807041	1	0.552345	0.482446	0.412527	1	0.687515	1	0.494062	1.90901e-19	FALSE	TRUE	0.488259	2.14653e-125	FALSE
Mt2	0.200376	1	0.293893	1	0.233219	1	0.679518	1	-0.734274	1	0.475872	1	0.893483	3.11184e-07	0.0842368	1	0.416034	1	0.516149	3.4316e-17	0.123143	1	0.465902	1	-0.533498	1	0.165537	1	0.138222	1	0.30677	1	0.151741	1	0.226297	1	0.60929	1	0.163335	1	0.399249	1	0.251166	2.03929e-07	FALSE	TRUE	0.319817	8.14862e-18	FALSE
Nmt1	0.0881374	1	0.123055	1	0.242729	1	0.719577	1	0.340541	1	0.517082	0.000350269	0.341158	0.394975	0.325817	1	0.424109	1	0.33097	3.37635e-31	0.249405	1	0.192725	1	0.54168	1	0.495972	0.042756	0.246608	1	0.424153	1	0.318731	1	0.419519	1	0.439438	1	0.400349	1	0.286469	1	0.35563	2.14189e-16	FALSE	TRUE	0.498114	3.78254e-224	FALSE
Nsa2	0.0851679	1	0.522	1	0.206744	1	0.2817	1	0.325391	1	0.571644	1.64024e-10	0.185177	1	0.320837	1	0.46425	1	0.293969	5.2898e-38	0.314354	0.00140871	0.341379	1	0.328616	1	0.403736	0.229103	0.341023	1	0.220369	1	0.0940759	1	0.318477	1	0.187528	1	0.20139	1	0.483683	1	0.30912	2.89239e-28	FALSE	TRUE	0.377103	1.53486e-204	FALSE
Psmb10	0.596214	1	0.537544	1	0.302033	1	0.269049	1	0.480376	1	0.275698	1	0.21762	1	-0.0933134	1	0.4782	1	0.423623	1.23828e-25	0.409742	1	0.130397	1	0.545864	1	0.320832	1	0.456073	1	1.05885	1	0.309704	1	0.647656	1	0.186255	1	0.634161	1	0.324769	1	0.405302	1.14287e-08	FALSE	TRUE	0.411832	2.80236e-74	FALSE
Psmb8	1.26709	6.59718e-06	0.401447	1	0.67197	1	0.916486	0.0102347	0.638791	1	0.618864	4.58991e-06	0.902978	1.39956e-14	0.892332	0.239607	0.401555	1	0.844026	3.34749e-135	1.06568	1.00788e-23	0.555596	0.00348721	0.730438	0.0349526	0.536426	0.402792	0.671379	0.0158992	1.05774	0.947236	0.502797	1	0.796271	0.083107	0.54433	0.12667	0.645577	1	0.776896	0.120892	0.735174	1.34685e-159	FALSE	TRUE	0.643277	0	FALSE
Psmb9	0.928889	0.000257698	0.806469	1	0.591599	1	0.671836	1	0.272747	1	0.511789	0.110178	0.767151	1.71502e-05	1.12191	0.0584398	0.449056	1	0.550796	2.33558e-49	0.908241	7.8102e-12	0.621638	0.000892633	0.694013	1	0.497112	1	0.571332	1	0.572865	1	0.601099	1	0.873317	0.325672	0.757032	0.001243	0.275916	1	0.563437	1	0.648012	7.62302e-51	FALSE	TRUE	0.558225	2.67442e-168	FALSE
Psme1	0.597613	0.0549994	0.187376	1	0.63876	1	0.508838	1	0.454976	1	0.456667	5.35055e-05	0.371841	0.347952	0.769059	1	0.392553	1	0.397944	1.65982e-46	0.420498	0.000636522	0.172773	1	0.116244	1	0.411954	1	0.51644	1	0.534005	1	0.35766	1	0.561706	1	0.225683	1	0.426139	1	0.370635	1	0.423303	5.86341e-32	FALSE	TRUE	0.428991	1.85591e-184	FALSE
S100a4	0.851009	0.238365	0.833052	1	0.674818	1	0.399723	1	0.923839	1	0.420528	0.185057	0.566103	0.00143	0.401921	1	0.266806	1	0.65759	4.96906e-83	0.554374	2.58411e-05	0.977266	1.62041e-06	0.761483	0.425449	1.54485	3.97269e-18	0.436616	1	0.35457	1	0.848388	1	0.317208	1	1.04422	5.18449e-05	0.634626	1	0.613502	0.508985	0.670595	1.53547e-89	FALSE	TRUE	0.664176	6.15311e-279	FALSE
Spp1	0.879107	1	0.0984379	1	0.403097	1	0.659791	1	-0.143127	1	0.483402	1	0.231195	1	1.82369	0.246938	0.367918	1	0.341133	5.22859e-22	0.641319	0.004051	0.561072	0.309736	0.782472	1	0.849174	0.000101352	0.767263	1	0.648543	1	0.468739	1	0.665071	1	0.382071	1	0.0852789	1	0.722498	1	0.558007	2.56415e-11	FALSE	TRUE	0.672296	3.42646e-162	FALSE
St13	0.144104	1	0.0875567	1	0.245957	1	0.362175	1	0.512971	1	0.320777	0.361813	0.153849	1	0.215335	1	0.273718	1	0.352275	1.41515e-40	0.150828	1	0.0246363	1	0.0479756	1	0.411376	1	0.247841	1	0.0779043	1	0.0337673	1	0.560258	1	0.174336	1	0.391013	1	0.201585	1	0.23763	5.96272e-20	FALSE	TRUE	0.434693	2.01685e-211	FALSE
Timp2	0.6355	1	0.268517	1	0.302114	1	0.30347	1	0.182893	1	0.470883	0.00067176	0.25201	1	1.10247	0.00128367	0.250504	1	0.334623	2.4854e-18	0.436982	0.00217388	0.401893	1	0.313702	1	0.508892	1	0.355521	1	0.441075	1	0.313185	1	0.282392	1	0.292579	1	0.383927	1	0.397481	1	0.391934	1.27354e-09	FALSE	TRUE	0.428654	2.06939e-92	FALSE
Tmsb4x	0.200699	1	0.813358	0.0285938	0.973443	1	1.33739	0.370334	1.12013	1	1.11371	1.04033e-17	1.84463	1.60498e-12	0.768251	0.835401	1.56362	0.0188688	0.895336	2.63601e-92	0.795447	1.50989e-11	0.553881	0.00147905	0.821085	0.00182583	1.24386	2.17768e-08	1.05805	0.658252	0.769547	1	0.894754	1	1.8598	0.00291471	0.66884	0.448573	0.7997	0.0760209	0.559316	0.0100625	0.983565	1.93771e-122	FALSE	TRUE	0.928016	0	FALSE
Tspo	0.688188	1	0.330958	1	0.0935365	1	-0.00616524	1	0.186919	1	-0.0275914	1	0.191429	1	0.382526	1	0.366937	1	0.225283	4.90069e-14	0.328655	0.612221	0.206071	1	-0.0370402	1	0.20363	1	0.231946	1	0.147218	1	0.162927	1	0.544802	1	0.0357065	1	0.154001	1	-0.128836	1	0.203862	0.0226424	FALSE	TRUE	0.413503	1.16389e-170	FALSE
Cct4	-0.204326	1	-0.141366	1	-0.448718	1	-0.336206	1	-0.283564	1	-0.32434	0.0018828	-0.114955	1	-0.351512	1	-0.326994	1	-0.221712	6.00384e-31	-0.325977	0.00799972	-0.231623	1	-0.472069	1	-0.491532	3.0873e-06	-0.484713	0.0778143	-0.0500651	1	-0.360319	1	-0.109216	1	-0.292582	1	-0.0511238	1	-0.380068	1	-0.285856	4.90049e-21	TRUE	FALSE	-0.133161	2.67515e-43	FALSE
Cotl1	-0.245879	1	-0.492583	1	-0.404816	1	-0.188859	1	-0.37744	1	-0.116525	1	-0.236578	0.786193	-0.236723	1	-0.3053	1	-0.122375	5.47004e-22	-0.0943745	1	-0.0816766	1	-0.374858	1	-0.470845	8.95345e-05	-0.265093	1	-0.210751	1	0.172418	1	-0.00191215	1	-0.174219	1	-0.155339	1	-0.372452	1	-0.226485	5.26665e-09	TRUE	FALSE	-0.135396	2.3447e-69	FALSE
Eef1g	-0.250369	1	-0.157541	1	-0.137565	1	-0.333228	1	-0.104393	1	-0.244588	0.0201981	-0.089551	1	-0.171017	1	-0.123466	1	-0.23075	1.35859e-36	-0.0954767	1	-0.068245	1	-0.321921	1	-0.293418	1	-0.143969	1	-0.349168	1	-0.401581	1	-0.42941	1	-0.252002	1	-0.143684	1	-0.0814901	1	-0.210611	8.01295e-18	TRUE	FALSE	-0.165501	5.09616e-65	FALSE
Hspa8	-0.305886	1	-0.17303	1	-0.209028	1	-0.150039	1	-0.400895	1	-0.316706	0.000429209	-0.186169	1	-0.397177	1	-0.35317	1	-0.198076	2.40625e-26	-0.314964	6.42543e-05	-0.0737904	1	-0.139281	1	-0.423409	0.00245016	-0.310443	1	-0.282301	1	-0.318087	1	-0.272586	1	-0.181257	1	-0.391864	1	-0.319543	1	-0.272271	1.8317e-16	TRUE	FALSE	-0.198604	1.7121e-86	FALSE
Hsph1	-0.34798	1	-0.125723	1	-0.443862	1	-0.211739	1	-0.282815	1	-0.190967	0.163235	-0.25336	0.591225	-0.368418	1	-0.596319	0.0146597	-0.112879	4.15166e-20	-0.357651	0.00496456	-0.286277	1	-0.268243	1	-0.188747	1	-0.287532	1	-0.095599	1	-0.453678	1	-0.60379	1	-0.0724699	1	-0.068193	1	-0.27972	1	-0.28076	2.00705e-08	TRUE	FALSE	-0.169779	1.02681e-109	FALSE
Jag1	-0.0957534	1	-0.140058	1	-0.332878	1	-0.237564	1	-0.404967	1	-0.14743	0.62183	-0.0211248	1	-0.154829	1	-0.251232	1	-0.277641	1.36977e-61	0.0208845	1	-0.196025	1	-0.768972	0.0308119	-0.370025	4.39675e-07	-0.261896	1	-0.577553	1	-0.172845	1	-0.215143	1	-0.272298	0.167735	-0.287049	1	-0.166872	1	-0.25387	1.17123e-44	TRUE	FALSE	-0.107334	1.91335e-94	FALSE
Klf6	-0.295957	1	-0.093941	1	-0.358858	1	-0.465813	1	-0.716485	1	-0.151096	1	-0.0280877	1	-0.565653	1	-0.153894	1	-0.330643	7.73259e-21	-0.252822	1	-0.0873868	1	-0.477357	1	-0.493176	1	-0.550931	1	-0.0266053	1	-0.441425	1	0.00630047	1	-0.405932	1	-0.70622	1	-0.444405	1	-0.335257	1.122e-05	TRUE	FALSE	-0.150105	2.96061e-31	FALSE
Pgf	-0.444817	1	-0.0524955	1	-0.939195	1	-0.115563	1	-0.558319	1	0.130479	1	-0.291271	1	-0.495089	1	-0.180508	1	-0.0946866	2.00398e-13	-0.172284	1	-0.311542	1	-0.250219	1	-0.134345	1	-0.413635	1	-0.294744	1	-0.379928	1	0.120041	1	-0.230672	1	-0.110788	1	0.0495285	1	-0.246193	0.046884	TRUE	FALSE	-0.171087	1.59456e-83	FALSE
Pmepa1	0.131383	1	-0.356144	1	-0.494825	1	-0.58742	1	-0.140878	1	-0.101175	1	-0.244529	1	0.0604221	1	-0.210063	1	-0.475149	3.71807e-56	-0.160126	1	-0.39788	1	-0.809894	0.0584865	-0.317553	1	-0.371403	1	-0.900037	1	-0.383155	1	-0.387146	1	-0.621185	1	-0.780465	1	-0.454732	1	-0.381045	2.15311e-33	TRUE	FALSE	-0.121455	2.69998e-18	FALSE
Polr1d	0.0229886	1	-0.320758	1	-0.242958	1	-0.239602	1	-0.573177	1	-0.545629	2.04388e-14	-0.147473	1	-0.329536	1	-0.205691	1	-0.0989377	2.07886e-06	-0.186096	1	-0.205453	1	-0.279802	1	-0.310195	0.0841049	-0.112313	1	0.228182	1	-0.160321	1	-0.555928	1	-0.237609	1	0.0471116	1	-0.200734	1	-0.221616	7.13749e-06	TRUE	FALSE	-0.158259	1.78331e-66	FALSE
Rps3	-0.0938623	1	-0.191937	1	-0.114427	1	-0.0955718	1	-0.347632	1	-0.379947	3.07558e-08	-0.149848	1	-0.230432	1	-0.197338	1	-0.142576	8.52677e-18	-0.208118	0.447744	-0.0813862	1	-0.423136	0.0706073	-0.330159	0.000268875	-0.253665	1	-0.180839	1	-0.386606	1	-0.287293	1	-0.0536676	1	-0.135214	1	-0.269303	1	-0.216808	6.2286e-12	TRUE	FALSE	-0.144263	3.5686e-66	FALSE
Rps3a1	-0.305508	1	-0.0806918	1	-0.28993	1	-0.216781	1	-0.148266	1	-0.423843	1.45841e-18	-0.203981	0.184707	-0.206862	1	-0.184297	1	-0.15574	2.30825e-26	-0.321608	3.61184e-09	-0.118598	1	-0.240871	1	-0.261472	0.00122578	-0.265217	0.0427988	-0.336395	1	-0.395332	0.116159	-0.252421	1	-0.00400282	1	-0.0207089	1	-0.189352	1	-0.220089	2.05381e-34	TRUE	FALSE	-0.188596	1.09699e-145	FALSE
Arhgdib	0.0836606	1	0.0755917	1	0.529787	1	0.101432	1	0.581542	1	0.157843	1	-0.12899	1	0.0438952	1	0.228431	1	0.301362	4.05272e-21	0.101828	1	0.214936	1	0.431586	1	0.385406	1	0.163854	1	0.514666	1	0.334911	1	0.384314	1	0.0732581	1	0.342644	1	0.00707928	1	0.234716	7.68627e-06	FALSE	TRUE	0.16587	1.64822e-12	FALSE
Cdkn2a	0.295023	1	-0.00127752	1	0.274014	1	0.0669841	1	0.661805	1	1.12767	5.48812e-21	0.083113	1	0.384503	1	0.257246	1	0.232492	8.29873e-16	0.230269	1	0.00672255	1	0.221054	1	0.28045	1	-0.0556618	1	0.433194	1	0.625758	1	0.348352	1	0.256791	1	0.305503	1	0.288691	1	0.301081	4.00524e-16	FALSE	TRUE	0.0595381	1	FALSE
0610009B22Rik	0.0102108	1	-0.127443	1	-0.0364793	1	0.0717005	1	-0.0122043	1	4.37023e-05	1	0.0387645	1	0.148138	1	-0.0980571	1	-0.0821606	2.52202e-17	0.0112827	1	-0.0900809	1	0.15703	1	-0.116911	1	-0.195647	1	0.140958	1	-0.102776	1	0.155233	1	-0.120169	1	-0.279572	1	-0.345333	0.12293	-0.041594	0.00031235	FALSE	FALSE	-0.015353	1.43401e-40	FALSE
0610009O20Rik	-0.0403372	1	0.0504748	1	0.0181113	1	-0.0533171	1	-0.0127026	1	-0.0116612	1	0.0445142	1	-0.129689	1	-0.0442394	1	0.0160093	0.0437486	-0.0436674	1	-0.00231461	1	-0.046487	1	-0.037493	1	-0.0133212	1	0.137785	1	-0.111435	1	-0.0394491	1	-0.00903639	1	-0.0517681	1	0.0281895	1	-0.016754	1	FALSE	FALSE	0.0170066	1.66982e-15	FALSE
0610010F05Rik	0.0428397	1	0.0286915	1	-0.0815058	1	-0.0749724	1	0.0972468	1	0.0739961	1	0.00319656	1	-0.161858	1	-0.0650558	1	-0.0101739	3.32493e-11	-0.0458517	1	0.0114505	1	-0.0605034	1	-0.0292483	1	-0.029487	1	0.207675	1	-0.0399061	1	-0.012124	1	-0.0489574	1	0.0315018	1	-0.0567333	1	-0.0104657	0.234801	FALSE	FALSE	-0.00643143	2.98716e-44	FALSE
0610010K14Rik	0.13866	1	-0.19509	1	0.0826077	1	-0.213814	1	-0.0633286	1	-0.0951344	1	-0.00746917	1	-0.160984	1	-0.157478	1	-0.0217515	2.66834e-11	-0.0788583	1	0.152734	1	-0.0708032	1	-0.0461194	1	-0.155003	1	-0.0883861	1	-0.170283	1	-0.207007	1	-0.0673094	1	0.0629175	1	-0.0173082	1	-0.0656765	0.221623	FALSE	FALSE	-0.0336587	2.43138e-56	FALSE
0610012G03Rik	-0.0588766	1	0.013351	1	-0.0890772	1	-0.137205	1	-0.348632	1	-0.0506081	1	0.0374134	1	0.0675579	1	-0.105419	1	0.0242158	1	-0.0122696	1	0.163272	1	-0.179989	1	0.063211	1	0.00104472	1	-0.00705697	1	0.273258	1	0.1129	1	0.0366642	1	0.24018	1	0.0824779	1	0.0060197	1	FALSE	FALSE	0.0649329	1	FALSE
0610030E20Rik	0.140108	1	-0.0155035	1	0.047627	1	-0.0552483	1	0.0909009	1	-0.00806922	1	0.0416531	1	-0.0759617	1	-0.0250765	1	-0.0250272	1.96486e-12	0.0293682	1	0.0207342	1	0.0100639	1	-0.0603393	1	0.235954	1	-0.191853	1	0.0125743	1	-0.0599688	1	0.0686462	1	-0.172724	1	0.0335899	1	0.00197374	0.102931	FALSE	FALSE	-0.00194382	6.19572e-38	FALSE
0610037L13Rik	0.0965387	1	-0.0831067	1	-0.0769539	1	0.0987988	1	0.23676	1	0.150298	1	-0.0551719	1	-0.126422	1	0.0588207	1	0.0204609	3.34675e-06	0.010277	1	0.129322	1	-0.0367445	1	-0.0523561	1	-0.0713824	1	-0.0478411	1	-0.100009	1	0.372545	1	-0.0480417	1	0.032966	1	0.0372052	1	0.0259983	0.981217	FALSE	FALSE	-0.0431297	1.66484e-75	FALSE
1110004E09Rik	-0.080785	1	-0.100705	1	0.106945	1	-0.208899	1	0.254633	1	-0.151118	1	-0.0714546	1	-0.236976	1	-0.0495971	1	0.0219382	0.000114938	-0.0276552	1	-0.156342	1	-0.0105438	1	-0.0202525	1	0.00331799	1	0.126214	1	-0.232779	1	-0.147684	1	-0.140315	1	0.128273	1	-0.0206702	1	-0.0483074	0.999515	FALSE	FALSE	-0.0423417	6.18135e-52	FALSE
1110008F13Rik	0.216201	1	-0.271557	1	-0.0740601	1	-0.187608	1	0.101486	1	-0.0946475	1	0.00418957	1	0.17628	1	-0.131029	1	0.0274079	1	0.0461857	1	-0.155013	1	0.107892	1	-0.0903438	1	0.00389258	1	0.0407144	1	0.0947887	1	-0.00839926	1	-0.0746105	1	0.182127	1	-0.0185665	1	-0.00498419	1	FALSE	FALSE	0.127229	0.000934351	FALSE
1110008P14Rik	-0.00614471	1	0.0859056	1	-0.119035	1	0.0907066	1	0.0866884	1	0.0531042	1	0.0245976	1	0.154771	1	0.138424	1	-0.0071327	0.0221541	-0.0665807	1	0.073269	1	-0.0963548	1	-0.0291231	1	0.297424	1	0.185971	1	0.12556	1	0.00700655	1	-0.0186905	1	0.107242	1	0.0832547	1	0.0557554	1	FALSE	FALSE	0.0718005	0.00245092	FALSE
1110012L19Rik	0.0221528	1	0.0698866	1	0.0595351	1	0.197259	1	0.289554	1	0.0420797	1	0.0112846	1	0.299609	1	0.00586789	1	0.0409543	0.236904	0.0845982	1	0.05703	1	0.0435637	1	0.0813728	1	0.00572805	1	-0.0843314	1	0.0474358	1	0.0638496	1	0.0403576	1	-0.144837	1	-0.0554339	1	0.0560723	1	FALSE	FALSE	0.0777605	1.32091e-06	FALSE
1110038F14Rik	-0.0648711	1	-0.188819	1	-0.105201	1	0.0504792	1	0.0992387	1	0.185105	1	0.0904238	1	0.286022	1	0.0683746	1	0.0979398	1	0.0285348	1	0.0247832	1	0.0785992	1	0.071335	1	0.0571019	1	0.173933	1	0.0426248	1	0.0610851	1	0.141493	1	0.332832	1	0.0360131	1	0.0746204	1	FALSE	FALSE	0.113515	1	FALSE
1110046J04Rik	0.0396006	1	0.0956891	1	-0.0244504	1	0.193807	1	0.0457035	1	0.0311745	1	0.0308986	1	0.0541729	1	0.133984	1	0.00609588	0.000192484	0.0609436	1	0.0368227	1	0.036118	1	-0.0423549	1	-0.0451778	1	-0.298411	1	0.00733893	1	0.139442	1	-0.0093109	1	-0.0732107	1	0.0968454	1	0.0245582	0.999771	FALSE	FALSE	0.0393778	3.39942e-11	FALSE
1110059E24Rik	-0.0996002	1	-0.0381971	1	-0.178092	1	0.073487	1	-0.021002	1	-0.0504265	1	-0.0876001	1	-0.26859	1	0.0406654	1	-0.000715901	8.15413e-11	0.0468605	1	0.0925507	1	-0.0455851	1	-0.0363613	1	0.172548	1	-0.235707	1	-0.0117776	1	-0.0819666	1	0.00410252	1	0.000737906	1	-0.187736	1	-0.0434479	0.29371	FALSE	FALSE	-0.0217154	9.85157e-61	FALSE
1110059G10Rik	-0.0280669	1	-0.103994	1	0.0830537	1	-0.0843771	1	-0.0371799	1	0.017098	1	0.021012	1	0.0597808	1	0.00164061	1	-0.0161129	8.80007e-11	0.115181	1	0.084482	1	0.185362	1	0.0877412	1	0.0260926	1	-0.0576418	1	-0.0511399	1	0.31886	1	0.00161666	1	-0.0587795	1	0.134995	1	0.0333154	0.299089	FALSE	FALSE	0.0399013	6.92928e-20	FALSE
1110065P20Rik	-0.234599	1	-0.00757274	1	0.0247125	1	0.090486	1	0.499683	1	0.000402971	1	-0.188099	1	-0.136342	1	-0.0813788	1	0.00598049	0.0294432	-0.177119	1	0.0616898	1	-0.195861	1	-0.168203	1	-0.128333	1	-0.0589092	1	0.051894	1	-0.162481	1	-0.0431351	1	0.300325	1	0.0156637	1	-0.0252951	1	FALSE	FALSE	-0.135157	9.40609e-84	FALSE
1190007I07Rik	0.128413	1	-0.0323367	1	-0.0314107	1	-0.134536	1	-0.126178	1	-0.107223	0.0474303	0.00215857	1	0.0743103	1	0.0164205	1	-0.0186909	7.51194e-09	-0.0875681	1	0.0389055	1	0.0883144	1	-0.000146834	1	-0.102893	1	-0.161885	1	-0.125314	1	-0.0852428	1	0.134498	1	0.0750913	1	0.0426971	1	-0.0196484	0.406917	FALSE	FALSE	-0.0237643	9.11378e-58	FALSE
1300002E11Rik	0.0633464	1	0.114852	1	-0.0230406	1	-0.175521	1	0.102464	1	-0.0438382	1	-0.0885846	1	0.0366551	1	-0.0742569	1	-0.00566633	1.02332e-06	0.0256189	1	-0.0293528	1	-0.0433471	1	0.0104721	1	0.0508879	1	0.273792	1	0.101919	1	-0.0672061	1	0.0130463	1	0.117577	1	0.0154779	1	0.0178712	0.957766	FALSE	FALSE	-0.00507501	3.4472e-42	FALSE
1500011K16Rik	-0.109685	1	-0.0613698	1	-0.0946691	1	-0.137743	1	-0.135179	1	-0.0306926	1	0.140681	1	-0.217462	1	0.178344	1	-0.0642343	1.08071e-13	-0.034839	1	0.0327369	1	-0.119075	1	-0.157918	1	0.0511986	1	0.176996	1	0.159768	1	-0.202221	1	-0.211003	1	-0.193259	1	-0.329522	1	-0.0647213	0.0372629	FALSE	FALSE	-0.024918	5.34192e-37	FALSE
1600012H06Rik	-0.092231	1	-0.192745	1	-0.0785565	1	0.0351871	1	-0.318721	1	-0.121745	1	-0.0583318	1	0.028874	1	0.00647713	1	-0.0327489	4.92646e-16	-0.0398147	1	-0.0618191	1	0.0370502	1	-0.0494565	1	-0.240233	1	-0.201759	1	-0.0352053	1	-0.171795	1	-0.0674192	1	-0.228312	1	0.0233905	1	-0.0885674	0.00383493	FALSE	FALSE	-0.0919042	2.61341e-118	FALSE
1700012B09Rik	-0.39589	1	0.105433	1	0.348797	1	0.0237796	1	0.125032	1	-0.271527	1	-0.250451	0.622056	0.35541	1	-0.00673946	1	0.0919446	1	0.0337499	1	-0.324234	1	0.240868	1	0.17868	1	0.0693852	1	0.102284	1	0.0891758	1	-0.172676	1	0.141979	1	0.4007	1	0.165887	1	0.0500757	1	FALSE	FALSE	-0.0151598	5.69072e-07	FALSE
1700017B05Rik	0.193182	1	0.0678414	1	-0.154519	1	0.178945	1	0.0340208	1	0.069267	1	-0.0069494	1	0.0470741	1	-0.00653509	1	-0.0142835	3.42319e-06	0.116961	1	-0.0200786	1	0.0381686	1	0.16218	1	0.062676	1	0.307971	1	-0.235383	1	-0.256581	1	0.0225113	1	-0.151956	1	0.0387417	1	0.0234883	0.981534	FALSE	FALSE	0.00858875	7.06756e-36	FALSE
1700020I14Rik	0.0946044	1	0.0731455	1	-0.138537	1	-0.12201	1	0.225399	1	-0.0702279	1	-0.0889648	1	0.0916546	1	-0.157936	1	-0.0840669	8.50431e-17	0.0683393	1	-0.0621948	1	-0.0837726	1	0.0413909	1	-0.140567	1	-0.364185	1	-0.198337	1	0.162771	1	0.0732984	1	-0.0871739	1	0.00788758	1	-0.0361658	0.00166719	FALSE	FALSE	-0.0103902	1.37148e-39	FALSE
1700021F05Rik	0.0745164	1	-0.0576871	1	-0.014995	1	-0.0218968	1	0.160485	1	-0.0478306	1	-0.132129	1	-0.0277295	1	-0.108036	1	0.0480669	0.0521963	-0.0071786	1	0.0507134	1	0.122633	1	0.08846	1	0.168667	1	-0.0545321	1	-0.269963	1	-0.13396	1	0.0659203	1	-0.0575643	1	0.125833	1	-0.00134321	1	FALSE	FALSE	0.010698	1.57635e-36	FALSE
1700025G04Rik	0.223273	1	-0.0538725	1	0.090872	1	-0.134759	1	-0.231976	1	0.0283879	1	0.0521286	1	0.0692678	1	-0.0624732	1	0.0559625	0.133917	0.125207	1	0.00578412	1	0.0859221	1	-0.0310056	1	-0.19434	1	-0.296851	1	0.320073	1	-0.0865646	1	0.124855	1	0.306056	1	-0.0857133	1	0.0147731	1	FALSE	FALSE	0.0651051	3.27869e-11	FALSE
1700037H04Rik	-0.0871283	1	-0.153192	1	-0.0521997	1	-0.0308575	1	-0.0414585	1	0.0308829	1	-0.0586548	1	-0.127268	1	0.110939	1	0.0131722	7.94427e-06	0.117208	1	-0.0131112	1	0.0190025	1	0.0276805	1	-0.0435935	1	0.119096	1	-0.0217179	1	-0.0338821	1	0.0854771	1	-0.0279634	1	-0.00281412	1	-0.00811349	0.990685	FALSE	FALSE	0.0668567	4.27742e-09	FALSE
1700123O20Rik	0.30374	1	0.0162459	1	-0.0903204	1	0.0636865	1	-0.0563928	1	-0.106708	0.779921	-0.036142	1	0.31479	1	0.0232549	1	0.0172559	1.25099e-05	-0.0391889	1	0.0619009	1	-0.166014	1	0.0683813	1	0.103854	1	0.0616546	1	0.0780996	1	-0.103272	1	-0.0160085	1	-0.313591	1	0.0254214	1	0.0100308	0.992237	FALSE	FALSE	-0.00208633	2.01031e-43	FALSE
1810009A15Rik	0.0346747	1	-0.116981	1	0.111354	1	-0.0510127	1	0.0635339	1	0.031544	1	0.0318742	1	-0.0753717	1	-0.011886	1	0.0196241	1.91781e-05	0.00946249	1	0.0718237	1	-0.016921	1	0.0567792	1	0.0490511	1	0.221556	1	0.0818535	1	0.0119523	1	-0.133906	1	-0.105327	1	0.0766327	1	0.0171577	0.995932	FALSE	FALSE	0.0286588	1.13257e-16	FALSE
1810013L24Rik	-0.00664407	1	-0.0107712	1	-0.202171	1	-0.0716337	1	0.0697364	1	0.00201203	1	-0.120639	1	-0.196478	1	0.164986	1	-0.025161	4.89756e-13	0.0568171	1	0.012667	1	0.0237332	1	0.045654	1	-0.0167262	1	0.0121851	1	-0.0189397	1	-0.0139596	1	-0.0461457	1	-0.064935	1	-0.14734	1	-0.0263692	0.0645562	FALSE	FALSE	0.0203616	1.89094e-32	FALSE
1810022K09Rik	-0.125526	1	0.0816334	1	0.168488	1	-0.206482	1	0.220209	1	0.0113607	1	-0.337196	0.00671935	-0.0667407	1	-0.16201	1	-0.0806705	0.00792171	0.0646372	1	-0.113435	1	-0.177086	1	-0.0644928	1	0.0431288	1	-0.290886	1	-0.0854508	1	0.091916	1	-0.0255494	1	0.0641957	1	-0.040504	1	-0.0490696	0.998686	FALSE	FALSE	0.00800825	1	FALSE
1810030O07Rik	0.154135	1	0.14409	1	-0.0920359	1	-0.165175	1	0.0241798	1	0.0107907	1	-0.000399851	1	0.0724615	1	0.0246231	1	-0.0140187	1.74221e-06	0.0905953	1	-0.10881	1	0.188615	1	0.0911231	1	-0.00505387	1	0.254126	1	0.112139	1	0.0420688	1	-0.0905108	1	-0.0232611	1	-0.0442388	1	0.0316877	0.97006	FALSE	FALSE	0.0287386	8.69174e-21	FALSE
1810032O08Rik	0.0270918	1	-0.176632	1	0.119703	1	-0.0193359	1	-0.533912	1	0.014251	1	0.127166	1	-0.0789765	1	0.0311109	1	-0.0318031	9.91476e-10	-0.00314788	1	-0.15412	1	-0.0167809	1	-0.108038	1	-0.0227214	1	0.0909893	1	0.00478359	1	0.163309	1	-0.0466093	1	-0.0586591	1	-0.0350703	1	-0.0336858	0.494364	FALSE	FALSE	-0.0077032	1.99218e-36	FALSE
1810043G02Rik	-0.0551685	1	-0.0983791	1	0.081808	1	0.00515095	1	-0.174968	1	-0.0311415	1	-0.033779	1	-0.0155505	1	0.00464552	1	-0.0282542	2.45375e-13	0.0193712	1	0.172898	1	0.0435873	1	0.0100165	1	-0.0931526	1	-0.022813	1	0.211177	1	0.174379	1	0.0468274	1	0.0492503	1	-0.00436432	1	0.0124543	0.0504744	FALSE	FALSE	0.0236712	2.44327e-30	FALSE
1810055G02Rik	0.0711668	1	-0.0640563	1	-0.0442682	1	-0.0874089	1	-0.00950673	1	-0.0185931	1	0.0410787	1	-0.164876	1	0.0664964	1	-0.0244081	2.4319e-14	0.0577942	1	0.0660874	1	0.147726	1	-0.0868955	1	-0.00994491	1	-0.000333519	1	0.116556	1	0.0841903	1	0.102205	1	-0.00547535	1	-0.0475983	1	0.00904459	0.0208111	FALSE	FALSE	-0.0368134	5.18211e-69	FALSE
1810058I24Rik	0.408048	1	-0.239898	1	0.0205072	1	0.135448	1	0.299319	1	0.153665	1	-0.0152398	1	0.320958	1	0.344602	1	0.153165	1	0.18399	1	0.255372	1	0.0907047	1	0.224732	1	0.049638	1	-0.202307	1	0.165565	1	0.0551114	1	0.0743414	1	-0.189877	1	0.107884	1	0.114082	1	FALSE	FALSE	0.140588	1	FALSE
2010107E04Rik	-8.25771e-05	1	-0.0433403	1	-0.275811	1	0.144717	1	0.0728818	1	-0.0569648	1	-0.202897	1	-0.256867	1	-0.118837	1	-0.0853789	0.000255612	-0.159475	1	-0.0838906	1	0.12034	1	-0.174039	1	-0.0730293	1	-0.148819	1	0.0755508	1	0.0529783	1	-0.147885	1	0.275599	1	-0.0699971	1	-0.0550118	0.999853	FALSE	FALSE	-0.149059	1.28375e-56	FALSE
2010320M18Rik	0.129613	1	0.251204	1	0.040201	1	0.0121226	1	-0.0549322	1	0.0136595	1	0.0197151	1	0.0879844	1	-0.0789086	1	0.0302182	0.0553611	0.0510755	1	0.033451	1	-0.0222467	1	0.0597756	1	0.160049	1	0.217314	1	-0.115249	1	-0.0753278	1	0.0457797	1	-0.05506	1	0.00935292	1	0.0361805	1	FALSE	FALSE	0.0353662	1.75752e-17	FALSE
2200002D01Rik	0.478065	1	0.36052	1	0.591237	1	0.14557	1	0.536445	1	0.229401	1	0.168637	1	0.130868	1	0.299646	1	0.102889	1	0.366378	0.0259233	0.472706	1	0.299375	1	0.685637	0.000428856	0.338935	1	0.302192	1	0.395684	1	0.052501	1	0.361443	1	0.308221	1	0.514667	1	0.340048	0.993109	FALSE	FALSE	0.133286	2.72907e-07	FALSE
2210016L21Rik	0.0978623	1	-0.234386	1	0.385892	1	0.0165186	1	-0.0620988	1	0.161857	1	0.0678653	1	-0.0454501	1	0.0455721	1	0.0610999	1	0.0756122	1	0.124367	1	0.0801884	1	0.0929898	1	0.179265	1	-0.0811559	1	0.161411	1	0.0948737	1	0.0135189	1	-0.17918	1	-0.0215937	1	0.049287	1	FALSE	FALSE	0.0608333	2.33358e-08	FALSE
2300009A05Rik	-0.037457	1	-0.310524	1	0.282552	1	0.144878	1	0.172622	1	0.0847945	1	-0.116523	0.715969	0.274946	1	-0.0692315	1	0.00391726	2.13675e-05	0.00243026	1	-0.193086	1	0.0827346	1	0.16698	1	0.120626	1	0.149203	1	-0.0779751	1	-0.0255274	1	-0.0109595	1	0.0537551	1	0.123852	1	0.0391433	0.994909	FALSE	FALSE	0.00167127	3.95764e-34	FALSE
2310009B15Rik	0.0220223	1	0.129775	1	0.436377	1	-0.113304	1	0.255064	1	-0.114483	1	-0.010057	1	-0.0410743	1	-0.194109	1	0.035114	1	0.096891	1	-0.0614737	1	0.204085	1	0.00725751	1	-0.260914	1	-0.0622021	1	0.118987	1	0.0104734	1	0.0278992	1	0.0633795	1	-0.106212	1	0.0211189	1	FALSE	FALSE	-0.0344467	7.87967e-16	FALSE
2310011J03Rik	0.281005	1	-0.0816081	1	0.180464	1	-0.168038	1	0.0065331	1	0.0434132	1	0.147395	1	-0.0904933	1	0.0959812	1	0.0360296	1	0.0390055	1	0.00128071	1	0.339487	1	-0.0218352	1	0.00887816	1	0.0290899	1	0.0118449	1	0.106234	1	0.0220914	1	0.00986564	1	0.0486133	1	0.0497732	1	FALSE	FALSE	0.0514612	9.56054e-12	FALSE
2310022B05Rik	0.573958	1	0.188447	1	-0.0673343	1	-0.165292	1	-0.0626828	1	0.158835	1	0.0523366	1	-0.0938759	1	-0.01558	1	0.0599878	0.104739	-0.0120448	1	0.291575	1	0.214226	1	0.121917	1	0.13241	1	0.0303294	1	-0.038419	1	0.278894	1	-0.0294829	1	-0.0414525	1	0.193077	1	0.0842776	1	FALSE	FALSE	0.0675898	5.92781e-15	FALSE
2310033P09Rik	0.0962147	1	0.0120282	1	-0.0153101	1	0.00223751	1	-0.175731	1	0.0371405	1	0.16926	1	0.144995	1	0.00946053	1	0.114312	1	0.101311	1	0.100329	1	-0.0041114	1	0.195748	1	0.0394127	1	0.2795	1	0.0409633	1	0.0838962	1	0.0515331	1	0.183988	1	0.188534	1	0.0788435	1	FALSE	FALSE	0.145292	1	FALSE
2310039H08Rik	0.0848527	1	0.224371	1	0.00120444	1	0.109495	1	0.0946108	1	0.016456	1	0.0725463	1	0.0801271	1	0.0626373	1	0.00997593	0.00190989	0.0890896	1	0.233973	1	0.0469916	1	0.0947341	1	0.00417398	1	0.302772	1	0.0815305	1	0.0840845	1	-0.110076	1	0.162777	1	0.109942	1	0.0883938	0.999997	FALSE	FALSE	2.0996e-05	1.98728e-25	FALSE
2310057M21Rik	-0.0491907	1	-0.0540737	1	-0.0564874	1	0.107392	1	0.132661	1	0.0477322	1	-0.0708414	1	-0.0173157	1	0.0627499	1	-0.0173429	1.00403e-10	-0.0115444	1	-0.0315477	1	-0.0930967	1	0.0599357	1	-0.12085	1	-0.156025	1	0.116697	1	-0.0550747	1	0.0206848	1	-0.0367849	1	-0.0135183	1	-0.0112305	0.308523	FALSE	FALSE	-0.0204765	5.59331e-56	FALSE
2310061I04Rik	0.0154009	1	0.0905087	1	-0.161767	1	0.127993	1	-0.214377	1	0.0147981	1	-0.116185	0.611576	-0.160956	1	0.03992	1	-0.00224573	9.06097e-06	-0.0648601	1	-0.0757551	1	0.110419	1	0.00088789	1	-0.105757	1	0.159565	1	0.0603844	1	-0.189327	1	0.113669	1	-0.223757	1	0.101989	1	-0.022831	0.987368	FALSE	FALSE	-0.0734546	4.21733e-77	FALSE
2410002F23Rik	0.0178306	1	0.0644894	1	0.00302092	1	-0.0372672	1	0.405857	1	0.0827055	1	-0.0821295	1	0.0523444	1	-0.0356155	1	-0.0140986	8.29921e-06	-0.0938455	1	0.0949461	1	0.0288757	1	-0.0380276	1	0.05222	1	-0.170226	1	-0.0210387	1	0.0371089	1	-0.0318996	1	-0.185806	1	0.0179772	1	0.00702005	0.991035	FALSE	FALSE	0.000918357	1.27451e-29	FALSE
2410004B18Rik	-0.0423851	1	-0.196724	1	-0.0480948	1	-0.344147	0.510876	-0.268589	1	-0.112119	1	0.0611986	1	-0.174872	1	-0.174292	1	0.00868122	1.16541e-07	-0.062294	1	0.0135184	1	-0.115573	1	0.122618	1	-0.208104	1	-0.272519	1	0.10438	1	-0.458567	0.790776	-0.031828	1	-0.0171386	1	-0.117958	1	-0.111181	0.814273	FALSE	FALSE	-0.064817	3.29633e-81	FALSE
2410015M20Rik	0.360236	1	-0.19637	1	0.151233	1	0.21699	1	0.332661	1	0.0587294	1	-0.0958839	1	-0.186636	1	0.206078	1	0.072129	1	0.295474	1	-0.00451349	1	0.321308	1	0.0616024	1	0.0825352	1	0.197228	1	-0.0212318	1	0.198648	1	0.00520501	1	0.167525	1	0.174086	1	0.114144	1	FALSE	FALSE	0.142677	4.0719e-07	FALSE
2410089E03Rik	-0.0917305	1	-0.0707327	1	-0.121086	1	-0.0552915	1	0.256121	1	0.0106733	1	0.11477	1	-0.0878628	1	-0.0233289	1	-0.00945524	8.78808e-11	0.0245889	1	0.0541364	1	-0.00535665	1	0.0234446	1	0.135715	1	-0.143713	1	-0.186594	1	0.250964	1	0.074159	1	-0.0189297	1	-0.125254	1	0.000249421	0.298992	FALSE	FALSE	0.0284223	4.50972e-25	FALSE
2410131K14Rik	-0.0446488	1	-0.130784	1	-0.0813173	1	0.0941854	1	0.01188	1	-0.0567034	1	-0.0213098	1	0.0259679	1	0.0446701	1	0.00337338	0.000304058	-0.00334315	1	0.0272075	1	0.030317	1	0.0183619	1	0.114743	1	-0.230328	1	0.0246321	1	0.00975875	1	-0.0807271	1	-0.211793	1	-0.210894	1	-0.0317501	0.999889	FALSE	FALSE	-0.0333068	2.03952e-61	FALSE
2510002D24Rik	0.177997	1	0.116251	1	-0.050409	1	0.148533	1	0.0605999	1	0.0300252	1	-0.00329081	1	-0.00697668	1	-0.0515384	1	0.0231622	0.0100188	-0.0388945	1	0.00108006	1	0.00796161	1	0.0063338	1	-0.000641762	1	0.0586455	1	0.0533204	1	-0.10766	1	0.0765951	1	0.0940246	1	0.0321549	1	0.0298702	1	FALSE	FALSE	0.0222609	8.27942e-28	FALSE
2510039O18Rik	-0.0917751	1	0.00780549	1	-0.062428	1	-0.225968	1	-0.0489639	1	-0.00987329	1	-0.0561712	1	-0.121662	1	0.0834583	1	-0.00543591	5.16886e-11	-0.116153	0.518882	-0.19412	1	-0.0138293	1	-0.0315466	1	0.0621788	1	0.0292493	1	0.162731	1	-0.29602	1	0.0453357	1	-0.0221109	1	-0.0618738	1	-0.0460558	0.221924	FALSE	FALSE	-0.097364	9.52353e-133	FALSE
2610001J05Rik	0.183345	1	0.291171	1	-0.196971	1	-0.306547	1	-0.248095	1	-0.0316452	1	-0.172831	1	0.289791	1	0.22444	1	-0.0595153	1.68663e-17	-0.0758984	1	-0.0420263	1	-0.0477981	1	0.0117859	1	-0.0921581	1	-0.0509898	1	-0.139482	1	0.159111	1	-0.183656	1	0.00930741	1	-0.14219	1	-0.0295645	0.00074762	FALSE	FALSE	-0.0505822	1.02151e-62	FALSE
2610002M06Rik	0.195911	1	-0.0586254	1	-0.0352522	1	-0.0281851	1	0.184892	1	0.0266402	1	-0.0370633	1	-0.00925779	1	0.02156	1	-0.00335132	0.00538969	0.0709829	1	0.124165	1	0.175111	1	0.0865706	1	-0.0604467	1	-0.0973771	1	-0.211788	1	0.0596027	1	-0.0924062	1	-0.115219	1	0.143299	1	0.0161792	1	FALSE	FALSE	0.0245696	1.05082e-21	FALSE
2610301B20Rik	-0.0894995	1	0.00530827	1	0.0736331	1	-0.117592	1	0.012848	1	0.0566066	1	-0.0456068	1	-0.0263636	1	0.0422515	1	0.0104619	0.0027417	0.00487422	1	0.0433775	1	0.112466	1	0.011207	1	-0.136454	1	0.118633	1	-0.00367192	1	-0.0511685	1	0.06705	1	0.174515	1	-0.0202772	1	0.0115523	0.999999	FALSE	FALSE	-0.00130132	2.01732e-33	FALSE
2610507B11Rik	-0.344814	1	-0.199439	1	-0.0998648	1	0.221274	1	0.107315	1	0.0759468	1	-0.0686042	1	-0.0574	1	0.0642618	1	-0.00649618	9.35551e-09	-0.21993	0.0054882	-0.0750299	1	0.134698	1	0.0386315	1	-0.0765702	1	-0.0295278	1	0.208036	1	0.00621416	1	0.12344	1	0.0934036	1	0.171427	1	0.00318915	0.262312	FALSE	FALSE	-0.173462	3.0238e-142	FALSE
2610524H06Rik	-0.124426	1	0.398856	1	-0.0516551	1	0.0524454	1	-0.140402	1	-0.0179021	1	-0.0201457	1	-0.0234096	1	-0.055871	1	-0.0209633	1.13464e-07	0.119607	1	0.0288187	1	-0.117274	1	0.0734859	1	-0.0762254	1	-0.0944141	1	0.267886	1	0.0286896	1	-0.084445	1	0.307471	1	0.0693274	1	0.0247359	0.868627	FALSE	FALSE	0.0282114	3.22593e-18	FALSE
2700049A03Rik	-0.0596796	1	-0.0860853	1	-0.0504823	1	0.029818	1	-0.155022	1	-0.0248205	1	-0.0338772	1	0.140006	1	0.0751334	1	-0.00219526	3.97389e-05	-0.0286031	1	-0.00904562	1	0.231405	1	-0.0169234	1	0.0237074	1	-0.119291	1	0.176444	1	-0.0346333	1	-0.0506516	1	0.0611107	1	-0.0846864	1	-0.000874844	0.998146	FALSE	FALSE	-0.00442266	1.27272e-33	FALSE
2700062C07Rik	0.00186272	1	-0.0728792	1	0.0448081	1	-0.139314	1	-0.0960381	1	0.0534836	1	-0.0550245	1	0.0126842	1	-0.0258754	1	0.0312304	0.0242123	0.0246631	1	0.0327038	1	-0.148249	1	-0.0240043	1	-0.0164861	1	0.173795	1	0.0725831	1	-0.0169456	1	0.121331	1	-0.102603	1	-0.0248148	1	-0.00728996	1	FALSE	FALSE	0.0471007	6.7839e-13	FALSE
2700081O15Rik	-0.0138934	1	-0.127564	1	0.0321488	1	-0.0993265	1	0.0935129	1	0.0610111	1	-0.0568722	1	-0.200964	1	-0.0053947	1	-0.0635161	8.40789e-24	0.0305495	1	0.011648	1	-0.0844382	1	0.118988	1	0.168302	1	-0.315945	1	0.0545356	1	-0.00705408	1	-0.0496552	1	-0.297267	1	-0.0432877	1	-0.0378325	1.75281e-07	FALSE	FALSE	-0.026401	4.30632e-53	FALSE
2700097O09Rik	-0.0875982	1	-0.0432456	1	-0.0787142	1	-0.0350406	1	-0.177045	1	0.00303529	1	-0.0524177	1	-0.100641	1	0.0155183	1	-0.0225914	2.00027e-11	0.0583971	1	-0.037221	1	-0.106097	1	-0.0618394	1	-0.0905295	1	-0.046388	1	-0.0273792	1	0.149576	1	-0.041133	1	0.0126166	1	0.0169149	1	-0.0358011	0.205128	FALSE	FALSE	-0.0347328	3.05016e-67	FALSE
2810004N23Rik	-0.370441	1	-0.155408	1	-0.238031	1	-0.18508	1	0.356414	1	0.174399	1	-0.0304642	1	0.147843	1	0.197703	1	-6.66293e-05	1	0.113901	1	-0.0421115	1	0.199137	1	-0.0168642	1	-0.158997	1	0.0459191	1	0.0494222	1	0.0260413	1	-0.103079	1	-0.116262	1	-0.0968499	1	-0.00966061	1	FALSE	FALSE	-0.0338016	1.76418e-11	FALSE
2810006K23Rik	-0.0610649	1	-0.0840161	1	0.217274	1	0.0335136	1	-0.00469881	1	-0.0484923	1	-0.0328102	1	0.114101	1	0.0381857	1	0.0339166	0.006706	0.010859	1	0.00173524	1	-0.0730749	1	0.140836	1	0.110573	1	-0.169338	1	0.10317	1	-0.194016	1	-0.0204535	1	-0.187789	1	0.162523	1	0.00433014	1	FALSE	FALSE	0.0341598	1.16977e-20	FALSE
2810403A07Rik	0.0630434	1	0.0748626	1	0.0201987	1	0.0913471	1	-0.16756	1	-0.0639429	1	0.030971	1	-0.282561	1	-0.161612	1	-0.0670658	4.3532e-27	-0.0851596	1	0.0297219	1	0.026333	1	-0.370648	2.23214e-08	-0.0582675	1	0.0575306	1	-0.209517	1	0.063004	1	0.10842	1	-0.291449	1	-0.205479	1	-0.0665633	4.01889e-15	FALSE	FALSE	-0.0384953	3.58155e-74	FALSE
2810474O19Rik	-0.0771497	1	-0.0217597	1	-0.193057	1	-0.0212252	1	0.0578731	1	0.339608	1	0.242365	1	0.24879	1	0.166493	1	0.0735973	1	0.223577	1	0.0700567	1	-0.312692	1	-0.0990789	1	0.246056	1	0.0773912	1	0.131083	1	0.0102467	1	0.169641	1	-0.379694	1	0.0940217	1	0.0498164	1	FALSE	FALSE	0.131716	1	FALSE
2900026A02Rik	-0.00649936	1	-0.258724	1	0.248266	1	0.165163	1	0.0494483	1	0.186205	1	-0.0208316	1	-0.0904493	1	-0.0164038	1	0.0260769	0.0942168	0.0149239	1	0.00442292	1	0.246243	1	0.083551	1	0.191409	1	0.220556	1	0.304256	1	0.11782	1	-0.0634212	1	-0.157357	1	0.211781	1	0.0693541	1	FALSE	FALSE	0.00773405	7.82038e-32	FALSE
2900060B14Rik	0.0371211	1	-0.15322	1	0.0859465	1	0.327246	1	0.0473469	1	0.00775671	1	-0.00175008	1	0.103439	1	-0.0623629	1	-0.00242333	7.92748e-05	-0.0410092	1	0.142006	1	0.0220068	1	-0.0759331	0.599556	0.0623047	1	0.068362	1	-0.00961429	1	0.0877799	1	0.0273855	1	0.167561	1	-0.0206494	1	0.0390143	0.998495	FALSE	FALSE	0.0116005	1.26331e-22	FALSE
2900097C17Rik	0.0956869	1	0.0849311	1	-0.00767497	1	0.258382	1	0.142354	1	0.0338886	1	-0.00565373	1	0.0895229	1	0.131585	1	-0.0868328	1.20439e-13	0.1682	1	-0.0552717	1	-0.0385804	1	0.114433	1	0.198463	1	0.0222891	1	0.13639	1	-0.155495	1	-0.111311	1	-0.0440296	1	0.103213	1	0.0511661	0.0388148	FALSE	FALSE	0.0973405	1	FALSE
3110009E18Rik	-0.0325646	1	-0.109453	1	-0.031584	1	-0.158887	1	0.00408916	1	-0.0399784	1	-0.000533009	1	-0.105442	1	-0.0255565	1	-0.01113	0.000296135	-0.0323855	1	-0.0124211	1	0.194474	1	-0.0235794	1	0.0534621	1	-0.157542	1	-0.0875746	1	-0.0116898	1	-0.00683721	1	0.137987	1	0.0601066	1	-0.0189066	0.999884	FALSE	FALSE	-0.016038	3.70613e-38	FALSE
3110040N11Rik	0.144549	1	0.0176647	1	-0.0553556	1	0.0294631	1	0.17908	1	0.00348106	1	-0.123933	0.0982653	0.190319	1	0.0456904	1	-0.00978295	1.05221e-08	-0.0188938	1	-0.0246912	1	-0.0666741	1	-0.0507777	1	-0.0678968	1	-0.0110248	1	0.189718	1	0.113909	1	0.118218	1	0.0580881	1	0.00164122	1	0.0315614	0.498046	FALSE	FALSE	0.0278414	1.09473e-23	FALSE
3110062M04Rik	0.172712	1	0.189254	1	0.0694017	1	0.0016473	1	-0.140294	1	0.025563	1	-0.00185099	1	-0.118766	1	0.014172	1	0.00345597	6.53363e-05	0.0166745	1	0.113123	1	0.0214628	1	0.0380362	1	-0.0900441	1	-0.197467	1	-0.0625461	1	-0.108518	1	-0.136337	1	0.0845167	1	0.233646	1	0.00608777	0.998979	FALSE	FALSE	0.00964702	2.02851e-25	FALSE
3110082I17Rik	0.0517023	1	-0.0403542	1	0.152231	1	0.113848	1	0.035666	1	0.160431	1	0.10902	1	0.0898656	1	-0.0341842	1	0.13783	1	0.0572208	1	-0.0559322	1	0.112079	1	0.19954	1	0.154426	1	0.154636	1	0.119275	1	-0.0849752	1	0.058144	1	0.19167	1	0.126719	1	0.086136	1	FALSE	FALSE	0.0749936	3.75702e-06	FALSE
3300005D01Rik	-0.196898	1	0.0199948	1	0.0864689	1	-0.203991	1	0.153658	1	0.173682	1	-0.0227388	1	-0.164758	1	0.0177655	1	0.0517521	0.473339	0.0665068	1	-0.0879176	1	0.126331	1	0.0873388	1	-0.00643215	1	-0.041603	1	-0.0600882	1	-0.00186844	1	0.205095	1	0.156392	1	-0.112004	1	0.011747	1	FALSE	FALSE	0.0128692	2.81759e-30	FALSE
3830403N18Rik	0.264937	1	-0.429572	1	-0.136218	1	-0.00712886	1	-0.0995768	1	0.169858	1	-0.123925	1	0.546856	1	0.0930685	1	-0.0241906	0.257008	0.0770369	1	0.0228294	1	0.0960321	1	-0.164792	1	0.271697	1	-0.12151	1	0.111178	1	0.0861122	1	0.180646	1	-0.0285587	1	-0.249855	1	0.0254725	1	FALSE	FALSE	0.131714	1	FALSE
3830406C13Rik	-0.117753	1	-0.154937	1	0.109041	1	-0.137907	1	0.0868442	1	0.0562366	1	-0.0188557	1	-0.0693822	1	-0.0417133	1	-0.013416	1.0236e-11	-0.014391	1	0.0249394	1	-0.250536	0.898552	0.0497635	1	0.136202	1	0.0524119	1	-0.0276345	1	0.1244	1	-0.118371	1	0.0571916	1	-0.0674864	1	-0.0159691	0.164974	FALSE	FALSE	-0.0323138	6.01941e-68	FALSE
4632415L05Rik	-0.202229	1	0.111811	1	-0.0714799	1	0.0614433	1	-0.127484	1	0.0995792	1	-0.023995	1	-0.105337	1	-0.0115198	1	0.0350838	0.00621026	0.0526461	1	0.0301945	1	0.175658	1	0.0214636	1	-0.0511204	1	0.21588	1	0.0232357	1	0.0448955	1	0.0333501	1	-0.0756948	1	0.219615	1	0.0217141	1	FALSE	FALSE	0.0551311	1.00718e-06	FALSE
4833420G17Rik	-0.0494616	1	0.311121	1	-0.145659	1	0.206464	1	-0.12193	1	0.0965782	1	0.0196187	1	-0.060002	1	0.124119	1	-0.00568002	1.95214e-05	0.0115526	1	0.0529212	1	0.0305531	1	0.0701015	1	0.175177	1	-0.21714	1	-0.0870732	1	-0.0712682	1	0.0260207	1	-0.212584	1	-0.0426982	1	0.00527289	0.996005	FALSE	FALSE	0.0528885	1.93958e-11	FALSE
4833439L19Rik	-0.155084	1	0.134955	1	0.0276447	1	-0.297609	0.00870554	0.464419	1	0.0102194	1	-0.0418527	1	0.076465	1	-0.100221	1	-0.0248011	4.1525e-11	-0.0534388	1	-0.0440199	1	0.122403	1	-0.0455135	1	0.0971838	1	0.317796	1	-0.0597189	1	-0.101572	1	0.0503971	1	-0.042477	1	0.122851	1	0.0218107	0.0580054	FALSE	FALSE	-0.00482588	1.41466e-39	FALSE
4921524J17Rik	-0.0959146	1	-0.00845073	1	0.219214	1	-0.23689	1	-0.21538	1	-0.0644905	1	0.0310723	1	-0.0233618	1	0.0592644	1	-0.0437666	7.71539e-11	-0.0197102	1	0.122498	1	0.0201422	1	-0.148009	1	0.0352038	1	0.271445	1	-0.116087	1	-0.145559	1	0.0857499	1	-0.455536	1	-0.146237	1	-0.0416573	0.289844	FALSE	FALSE	-0.117147	2.63385e-78	FALSE
4930402H24Rik	0.0541231	1	0.204195	1	-0.00468316	1	-0.00470563	1	0.146407	1	0.0152581	1	-0.00614564	1	-0.0339989	1	0.0559673	1	-0.0362003	1.22728e-15	0.0399397	1	-0.0619926	1	-0.0650318	1	-0.0122001	1	-0.0933698	1	0.00997238	1	-0.0283731	1	-0.0601972	1	-0.0305382	1	-0.139744	1	0.0314784	1	-0.000944764	0.00581473	FALSE	FALSE	0.0154039	1.23833e-21	FALSE
4930453N24Rik	-0.178393	1	0.0948911	1	-0.0300492	1	0.0365325	1	-0.118502	1	-0.0262753	1	-0.0981508	1	-0.124411	1	-0.0332359	1	-0.00407996	1.54559e-07	-0.0970152	0.189738	-0.0603511	1	0.0518758	1	-0.0872513	1	0.00146063	1	-0.00314002	1	0.0675239	1	0.137738	1	-0.0747647	1	-0.124036	1	-0.0316931	1	-0.0333965	0.780928	FALSE	FALSE	-0.0535113	1.49444e-71	FALSE
4930503L19Rik	0.0626886	1	-0.0958885	1	-0.0344614	1	0.242882	1	0.169225	1	-0.0393654	1	0.0928566	1	-0.00434284	1	0.0287863	1	-0.0224455	2.26306e-09	-0.0180796	1	-0.119105	1	0.0324105	1	-0.0109097	1	0.0449286	1	-0.0785554	1	-0.153007	1	0.0851543	1	-0.125591	1	-0.0247776	1	-0.0427917	1	-0.000494692	0.567394	FALSE	FALSE	-0.0046018	8.6753e-32	FALSE
4930523C07Rik	0.34917	1	0.0348074	1	0.0121093	1	0.0777298	1	0.393685	1	0.338207	1	0.416503	1	-0.591126	1	0.240203	1	0.114636	1	0.122735	1	0.414762	1	0.184602	1	0.132929	1	0.340374	1	0.348363	1	-0.0941151	1	-0.136299	1	-0.0483815	1	0.115391	1	0.0429519	1	0.133773	1	FALSE	FALSE	0.0234816	2.11029e-12	FALSE
4931406C07Rik	0.0346623	1	0.255417	1	0.0916068	1	0.102175	1	0.117317	1	0.00273085	1	0.0188073	1	-0.194059	1	0.112534	1	-0.0352701	7.87032e-12	0.0674157	1	0.101043	1	-0.108869	1	0.0770959	1	0.00542914	1	-0.128612	1	0.0148227	1	0.207419	1	-0.0103704	1	-0.0240214	1	0.0478042	1	0.0359561	0.157666	FALSE	FALSE	0.054076	1.41449e-15	FALSE
4931406P16Rik	0.177328	1	-0.155395	1	-0.0601301	1	0.00845491	1	0.118629	1	0.041862	1	0.00595775	1	-0.0502132	1	-0.0355795	1	-0.0439574	3.11218e-16	0.0619843	1	-0.0336015	1	0.223248	1	0.115326	1	0.26156	1	-0.110028	1	-0.146139	1	0.173429	1	-0.08416	1	-0.0805407	1	-0.139441	1	0.0118378	0.00309665	FALSE	FALSE	0.0159053	1.37232e-30	FALSE
4932438A13Rik	0.0989427	1	0.262684	1	-0.117582	1	-0.319747	1	0.0540181	1	0.212769	1	0.0295482	1	0.0327904	1	0.0274971	1	-0.015429	3.46159e-07	1.87205e-05	1	-0.0505031	1	-0.0932838	1	-0.104369	1	0.202987	1	0.0513848	1	0.0274006	1	-0.0623814	1	0.0436889	1	-0.102415	1	0.0319076	1	0.00999651	0.922092	FALSE	FALSE	0.0690944	4.54924e-06	FALSE
4933434E20Rik	0.0740602	1	-0.108006	1	-0.0337292	1	0.00933181	1	-0.108119	1	-0.13303	1	0.0867019	1	-0.305067	1	0.00604318	1	-0.0917522	2.08386e-15	0.0220456	1	-0.0814216	1	-0.0374746	1	-0.246529	1	-0.0873345	1	-0.16434	1	0.0102392	1	-0.193032	1	-0.0263937	1	-0.178774	1	-0.317385	1	-0.090665	0.00736218	FALSE	FALSE	-0.0839159	2.85498e-58	FALSE
5031425E22Rik	-0.0480761	1	0.350827	1	0.0972109	1	0.132517	1	0.0100827	1	0.0898727	1	0.0163098	1	-0.0555111	1	0.113454	1	0.0270397	2.59296e-05	-0.0154216	1	0.12626	1	0.0197579	1	-0.0787784	1	-0.117065	1	-0.148922	1	-0.0732637	1	-0.131012	1	-0.0750357	1	0.0468311	1	0.237791	1	0.0249937	0.997027	FALSE	FALSE	0.0167754	1.1265e-38	FALSE
5031439G07Rik	-0.00721321	1	0.0740868	1	0.106422	1	0.18282	1	-0.158272	1	0.0264738	1	-0.0607223	0.319029	-0.0489011	1	0.0206877	1	0.00934503	1.22649e-05	-0.0466227	1	0.00848784	1	-0.054874	1	0.140856	1	-0.0417016	1	-0.221808	1	-0.0245502	1	0.0649693	1	0.0308471	1	-0.219341	1	-0.164688	1	-0.0182714	0.98333	FALSE	FALSE	0.0298067	4.0987e-20	FALSE
5430416N02Rik	-0.0803749	1	0.033323	1	0.0599	1	-0.105728	1	-0.498535	1	-0.00184988	1	-0.0848267	1	0.0769586	1	-0.207579	1	-0.021433	4.44891e-06	-0.0808988	1	-0.207811	1	-0.0727933	1	-0.0303753	1	-0.274213	1	0.204989	1	-0.107323	1	0.349485	1	-0.209621	0.264371	0.130946	1	0.170512	1	-0.0455832	0.961287	FALSE	FALSE	-0.0301648	1.99927e-46	FALSE
5730455P16Rik	-0.0746319	1	-0.0567995	1	0.0971321	1	0.0664017	1	-0.0941682	1	0.0578036	1	0.0807203	1	-0.0816655	1	-0.0382244	1	0.00914774	0.0001833	-0.0132496	1	0.111505	1	-0.132276	1	-0.0284	1	0.111872	1	0.130445	1	0.0517024	1	0.0474432	1	-0.054965	1	-0.0190655	1	0.0298451	1	0.00955107	0.999753	FALSE	FALSE	0.0223365	1.99905e-16	FALSE
5730480H06Rik	-0.0723709	1	0.0455859	1	0.0278351	1	-0.0796323	1	0.258113	1	0.0436148	1	-0.0517288	1	0.0145312	1	-0.0422115	1	0.0157277	0.0303472	-0.00558567	1	-0.117174	1	-0.00596069	1	-0.00453172	1	-0.0595784	1	-0.151243	1	0.00230629	1	0.0847337	1	-0.0260751	1	-0.0221158	1	0.0960752	1	-0.00236594	1	FALSE	FALSE	-0.00431532	2.36505e-40	FALSE
5730559C18Rik	-0.0333685	1	-0.197238	1	0.152947	1	0.0116242	1	-0.139576	1	-0.0439025	1	-0.0371745	1	0.214845	1	0.0696387	1	-0.0900209	5.08112e-23	-0.0501255	1	0.00532358	1	-0.28473	1	0.0546693	1	0.118498	1	0.119142	1	0.0966175	1	0.308605	1	-0.193409	1	-0.0963774	1	-0.0791156	1	-0.00443469	5.42404e-07	FALSE	FALSE	-0.0197987	2.13932e-41	FALSE
5930430L01Rik	-0.0787739	1	0.326453	1	0.146166	1	-0.0631791	1	-0.0589598	1	0.0562193	1	-0.0711711	1	0.189378	1	0.00517165	1	0.0157237	0.0131867	0.0574204	1	-0.0460618	1	0.17508	1	-0.0518285	1	-0.0277098	1	0.00718091	1	0.168772	1	0.0819603	1	-0.0196634	1	0.0518583	1	-0.052408	1	0.038649	1	FALSE	FALSE	0.032501	1.29164e-10	FALSE
9130401M01Rik	-0.208501	1	-0.0293276	1	0.00436215	1	-0.216227	1	0.317867	1	-0.128265	1	-0.298876	0.0115795	-0.0438772	1	-0.0920613	1	-0.00767179	1	-0.0144507	1	-0.00823592	1	-0.0428769	1	-0.208844	1	-0.134727	1	0.176546	1	-0.0572564	1	-0.142351	1	-0.105588	1	-0.0151358	1	-0.036247	1	-0.0615116	1	FALSE	FALSE	0.0494822	1	FALSE
9430038I01Rik	0.0169104	1	-0.188051	1	0.216941	1	-0.0899287	1	-0.102126	1	0.015599	1	-0.0489601	1	0.108891	1	0.0249171	1	0.0036665	4.57804e-05	0.0298974	1	-0.0788992	1	0.12278	1	0.0581532	1	0.0250386	1	0.0761571	1	-0.0100991	1	0.112036	1	0.0300231	1	-0.0723177	1	-0.0673205	1	0.00872895	0.998427	FALSE	FALSE	0.00535636	2.02706e-33	FALSE
9530068E07Rik	-0.0486799	1	0.00667064	1	0.0906978	1	-0.225908	1	-0.311528	1	-0.138629	1	0.000361933	1	-0.120226	1	-0.0167146	1	-0.121432	4.73151e-18	0.032038	1	0.0908506	1	-0.0818827	1	-0.159813	1	-0.079268	1	0.324479	1	0.0498847	1	0.0542608	1	0.0981062	1	-0.428915	1	-0.112736	1	-0.0523039	0.000389548	FALSE	FALSE	-0.0549273	7.39295e-41	FALSE
9930021J03Rik	-0.0277131	1	-0.00933279	1	0.156641	1	-0.235597	1	0.00473177	1	-0.0304346	1	0.0147664	1	0.00952694	1	0.0404468	1	-0.0417221	4.7022e-15	0.0747603	1	-0.0129405	1	-0.234558	1	-0.0788461	1	0.0187968	1	-0.000605257	1	-0.0983537	1	0.166335	1	0.063407	1	-0.294318	1	-0.0685824	1	-0.0277901	0.0104955	FALSE	FALSE	0.0113216	4.2433e-34	FALSE
AA467197	0.231763	1	0.204405	1	0.177051	1	-0.0380276	1	0.147271	1	0.185287	1	0.22595	1	0.133754	1	0.334786	1	0.159035	1	0.294412	1	0.358226	1	0.142007	1	0.20786	1	0.353206	1	-0.00235864	1	0.194986	1	0.487115	1	0.128315	1	0.457223	1	-0.146815	1	0.201688	1	FALSE	FALSE	0.37586	1.3878e-56	FALSE
Aacs	0.00650965	1	-0.0314324	1	0.0454467	1	-0.0283068	1	-0.0996732	1	-0.0275616	1	-0.0770473	1	-0.12772	1	-0.0724323	1	-0.0153965	9.45882e-09	-0.0753177	1	0.055773	1	-0.128948	1	-0.0178598	1	0.0875942	1	0.175457	1	-0.0183437	1	0.023205	1	-0.0717925	1	-0.0555992	1	0.0230351	1	-0.0204958	0.691775	FALSE	FALSE	-0.0340577	2.66722e-65	FALSE
Aaed1	-0.140261	1	0.0156282	1	0.0117697	1	0.0314983	1	-0.412082	1	-0.124473	0.0128468	-0.0536448	1	-0.143348	1	-0.0324183	1	-0.0490256	1.09549e-18	0.0217333	1	-0.0298866	1	-0.212963	1	-0.12042	0.278304	-0.101595	1	-0.078274	1	-0.0825306	1	0.200557	1	-0.0201079	1	-0.0524899	1	-0.0588417	1	-0.0681512	7.53349e-06	FALSE	FALSE	-0.0331087	5.01328e-65	FALSE
Aak1	-0.0107648	1	0.133811	1	-0.0339747	1	-0.20632	1	0.411065	1	0.0364238	1	0.0232095	1	-0.1257	1	0.101692	1	0.0159646	2.65706e-05	-0.0558751	1	0.0132415	1	0.136719	1	0.11809	1	0.000636367	1	-0.127709	1	-0.0676544	1	0.0448654	1	0.0477959	1	0.248053	1	-0.216824	1	0.0231784	0.997103	FALSE	FALSE	0.0140306	4.13303e-32	FALSE
Aamdc	0.172005	1	0.0578589	1	0.0527225	1	0.0853815	1	0.212753	1	0.0240581	1	0.0251453	1	-0.128498	1	-0.0839078	1	0.0183031	0.00538837	0.033483	1	-0.0609744	1	-0.0496188	1	0.0777283	1	0.0681267	1	0.0175514	1	-0.00835183	1	0.0810347	1	-0.0388919	1	0.0272233	1	0.0113087	1	0.0283067	1	FALSE	FALSE	0.0122702	2.06262e-36	FALSE
Aamp	0.249889	1	0.197152	1	0.123616	1	0.488075	1	0.120961	1	0.378543	0.289054	0.289916	1	0.0688329	1	0.242347	1	0.231743	2.97968e-07	0.263707	1	0.276175	1	0.273534	1	0.237973	1	0.131264	1	-0.11521	1	0.642521	1	0.212524	1	0.272326	1	0.288118	1	-0.0115204	1	0.231547	0.852717	FALSE	FALSE	0.229382	2.47876e-32	FALSE
Aars	-0.101489	1	0.183035	1	-0.0476707	1	0.0271288	1	-0.0729204	1	-0.0212915	1	-0.116191	1	-0.0683651	1	-0.119323	1	-0.0745855	3.54189e-14	-0.0641944	1	-0.133021	1	-0.0388721	1	0.0352214	1	0.164378	1	0.0367888	1	0.157916	1	-0.134215	1	-0.141455	1	0.126384	1	-0.0262613	1	-0.0204287	0.0241897	FALSE	FALSE	-0.115684	5.30013e-81	FALSE
Aasdhppt	-0.221567	1	0.149866	1	-0.149967	1	-0.305802	1	0.0715125	1	-0.121189	1	-0.198817	1	-0.105023	1	-0.121623	1	-0.0379729	0.00454524	-0.0778107	1	-0.146573	1	0.168607	1	-0.0471209	1	0.138819	1	0.104421	1	0.081763	1	-0.0994623	1	-0.0511094	1	-0.0202403	1	0.0264409	1	-0.0458499	1	FALSE	FALSE	-0.0759886	1.5801e-29	FALSE
Aatf	-0.118722	1	-0.280535	1	-0.137662	1	-0.128905	1	0.026099	1	0.168358	1	-0.0422901	1	-0.0599314	1	-0.217121	1	-0.0821546	1.10055e-10	-0.0160643	1	-0.104321	1	-0.170256	1	-0.00432558	1	-0.229139	1	0.186256	1	-0.0154698	1	0.158803	1	-0.0859399	1	-0.0879378	1	-0.306718	1	-0.0737132	0.315187	FALSE	FALSE	-0.0400476	1.22046e-30	FALSE
Abca5	-0.0223659	1	0.139086	1	-0.176423	1	0.151448	1	-0.0341937	1	0.0360449	1	0.0129078	1	-0.107046	1	-0.0301157	1	-0.0149469	2.27179e-07	-0.0287101	1	-0.128896	1	-0.0529076	1	-0.0633464	1	0.159986	1	-0.125423	1	0.0346504	1	-0.141112	1	-0.00135681	1	-0.0779049	1	-0.006712	1	-0.0227304	0.903969	FALSE	FALSE	-0.0114948	1.00957e-39	FALSE
Abcb9	0.0389448	1	-0.107427	1	0.0113373	1	-0.0938519	1	-0.0525448	1	-0.0281687	1	-0.0184551	1	-0.00219853	1	0.0423228	1	-0.029765	1.17529e-12	0.0286868	1	0.0467955	1	-0.0216979	1	0.0687447	1	0.0761774	1	0.0349814	1	0.0165299	1	-0.0315446	1	-0.0151427	1	-0.0614962	1	0.0571513	1	-0.00193432	0.0870054	FALSE	FALSE	0.0176818	6.44441e-17	FALSE
Abcc1	-0.00810766	1	0.0164072	1	0.0656861	1	-0.0281889	1	-0.00400751	1	0.0290183	1	0.0814818	1	0.0117303	1	0.0492771	1	-0.0569271	3.73009e-14	-0.0381919	1	0.023935	1	0.0591411	1	0.183957	1	0.0476236	1	0.0141581	1	0.3068	1	0.204878	1	-0.217279	1	0.0915939	1	-0.119912	1	0.0339559	0.0246914	FALSE	FALSE	0.0622133	9.65423e-12	FALSE
Abcd3	0.0704362	1	0.197618	1	-0.0494523	1	0.0633217	1	0.0304696	1	0.0946048	1	0.0114472	1	0.076109	1	0.252194	1	0.0429823	0.0146343	0.196831	1	0.0375555	1	0.170603	1	0.106449	1	0.095867	1	0.0764967	1	0.0489987	1	0.0649233	1	0.0246522	1	0.085521	1	0.2606	1	0.0932489	1	FALSE	FALSE	0.0644874	1.30732e-13	FALSE
Abce1	-0.31681	1	-0.242558	1	-0.411979	1	0.0596175	1	-0.0854479	1	-0.0305169	1	-0.05158	1	-0.16573	1	0.046042	1	-0.126418	1.22336e-12	-0.222178	1	-0.172812	1	-0.0254437	1	-0.111512	1	-0.113921	1	0.193959	1	-0.132117	1	0.0920309	1	-0.36483	1	-0.118521	1	-0.0467634	1	-0.111785	0.0881706	FALSE	FALSE	-0.198609	4.46621e-92	FALSE
Abcf1	-0.301558	1	0.0472769	1	0.0431514	1	0.156045	1	0.0874431	1	0.146183	1	-0.0600432	1	-0.0043022	1	0.127038	1	0.0582918	1	-0.00783071	1	-0.0329383	1	-0.0137967	1	0.219426	1	0.110864	1	0.323872	1	0.115929	1	0.0510484	1	-0.0747585	1	-0.179121	1	0.0309305	1	0.04015	1	FALSE	FALSE	-0.03014	2.16184e-06	FALSE
Abcf2	-0.043579	1	0.17678	1	-0.131061	1	-0.0911014	1	0.339318	1	-0.0261611	1	-0.0447823	1	-0.256731	1	-0.17433	1	-0.00617585	0.00015246	-0.166602	1	-0.186838	1	0.0515387	1	0.0540532	1	0.185788	1	-0.0436101	1	0.137607	1	-0.0299196	1	-0.186588	1	0.00101738	1	0.185974	1	-0.0121621	0.999675	FALSE	FALSE	-0.0656187	3.10336e-54	FALSE
Abcg2	-0.0835926	1	0.14228	1	0.0166275	1	0.0633048	1	-0.0728928	1	0.0391006	1	0.0123302	1	-0.144516	1	-0.0891405	1	0.0241035	0.000490988	-0.022234	1	-0.0667424	1	-0.0184977	1	-0.144111	0.921165	-0.0637183	1	0.270566	1	0.130383	1	0.136901	1	0.0276875	1	-0.0611932	1	-0.00680593	1	0.00427808	0.999944	FALSE	FALSE	-0.0113421	8.78247e-41	FALSE
Abhd11	0.0130013	1	-0.104603	1	-0.00504101	1	-0.0422842	1	-0.182024	1	0.00847196	1	0.0817477	1	-0.0824521	1	0.0124584	1	0.0149976	0.0183162	-0.0033116	1	-0.0649143	1	-0.0363609	1	-0.0422638	1	-0.0694321	1	0.241008	1	-0.102637	1	0.257526	1	-0.000327381	1	0.283869	1	0.118003	1	0.0140682	1	FALSE	FALSE	0.0556276	1.273e-12	FALSE
Abhd12	0.327611	1	0.0737537	1	-0.16856	1	0.0281913	1	0.0437471	1	0.0525357	1	0.0536464	1	0.0501549	1	-0.0300624	1	0.0126339	4.85897e-06	0.00988915	1	0.0794144	1	0.00937757	1	0.142572	1	0.237637	1	-0.0535903	1	-0.0839287	1	-0.0609152	1	-0.0634586	1	-0.0397713	1	0.0801067	1	0.0333802	0.985946	FALSE	FALSE	0.0476361	6.01053e-17	FALSE
Abhd14a	0.155207	1	-0.125339	1	-0.0525892	1	-0.105376	1	-0.253637	1	-0.024586	1	0.00310199	1	-0.231135	1	-0.117135	1	-0.0156805	2.24573e-13	-0.125436	0.0434032	0.0969113	1	0.080399	1	-0.0542741	1	-0.0697457	1	0.143398	1	-0.0955933	1	-0.032275	1	-0.0281789	1	0.268664	1	-0.104462	1	-0.0327506	0.0142954	FALSE	FALSE	-0.0275213	9.76989e-69	FALSE
Abhd16a	0.267079	1	0.0570272	1	0.253245	1	-0.138213	1	0.0389136	1	-0.0135196	1	-0.0695785	1	0.128391	1	0.200471	1	0.0436216	0.0158302	0.0874775	1	0.070242	1	0.142361	1	-0.0329599	1	-0.0145758	1	0.207444	1	-0.114623	1	-0.126927	1	0.0624258	1	0.0665675	1	-0.209375	1	0.0431188	1	FALSE	FALSE	0.039316	6.56802e-21	FALSE
Abhd17a	0.258343	1	-0.0539199	1	-0.151958	1	-0.0426823	1	-0.154504	1	-0.0126645	1	0.0567965	1	0.0551424	1	0.254138	1	-0.00625348	2.62304e-05	-0.0831615	1	-0.0590036	1	0.0764607	1	-0.033598	1	0.00357903	1	0.246484	1	-0.0919763	1	-0.0313456	1	-0.0414643	1	0.234818	1	0.0855365	1	0.024227	0.997063	FALSE	FALSE	-0.0028003	9.7265e-28	FALSE
Abhd17b	0.00767377	1	0.0311417	1	-0.14455	1	0.101119	1	0.0824813	1	-0.121012	0.0848182	-0.0786475	1	0.00729599	1	0.124234	1	0.00099648	8.02109e-11	-0.048284	1	-0.0452943	1	-0.0183511	1	-0.0760324	1	-0.202021	1	-0.0776479	1	-0.220966	1	-0.00965578	1	-0.105411	1	0.115723	1	-0.138583	1	-0.0388472	0.151055	FALSE	FALSE	-0.0566292	6.69849e-92	FALSE
Abhd17c	-0.0254246	1	0.0417477	1	-0.0138292	1	-0.0666499	1	-0.00690126	1	-0.0469096	1	0.0103199	1	-0.170488	1	-0.110665	1	0.0198392	5.35401e-05	0.029049	1	-0.0895738	1	0.154213	1	0.0799307	1	-0.0493954	1	-0.0416373	1	-0.106112	1	0.0607773	1	-0.04465	1	0.0464218	1	-0.0663555	1	-0.0188711	0.998695	FALSE	FALSE	0.0147182	5.00079e-27	FALSE
Abhd2	0.402372	1	0.129825	1	0.159267	1	0.231162	1	0.229527	1	0.151941	1	0.298965	1	-0.0117459	1	-0.088783	1	0.0747309	0.776824	0.0908013	1	0.0731965	1	0.284972	1	0.320214	1	-0.0499402	1	-0.0987973	1	0.126576	1	0.428028	1	0.0658295	1	-0.079102	1	0.213377	1	0.140591	1	FALSE	FALSE	0.0727073	4.04126e-16	FALSE
Abhd4	0.03605	1	-0.0499083	1	-0.108621	1	0.0176377	1	0.219935	1	0.0301438	1	-0.111501	0.408655	-0.00161998	1	0.0728853	1	0.0357587	1	0.0517058	1	0.0454004	1	-0.101901	1	0.148899	1	0.212925	1	0.0113004	1	0.16116	1	-0.0925972	1	0.0233589	1	0.0554458	1	0.0611963	1	0.034174	1	FALSE	FALSE	0.0300395	1.05584e-12	FALSE
Abhd5	0.178935	1	0.239039	1	0.0562793	1	-0.115491	1	-0.00571116	1	0.151289	1	0.109086	1	0.0399024	1	0.145908	1	0.0321538	0.12558	0.0590312	1	0.00201506	1	-0.144773	1	0.107421	1	0.0840933	1	-0.185283	1	0.0237384	1	0.0975136	1	0.0593228	1	-0.0624469	1	0.180029	1	0.0500977	1	FALSE	FALSE	0.0803227	2.93458e-07	FALSE
Abhd8	-0.155382	1	-0.114687	1	-0.0366158	1	-0.361605	0.0169453	0.116436	1	-0.0400813	1	-0.0921597	0.15957	-0.116546	1	-0.0747103	1	-0.0198059	2.26379e-10	-0.0173272	1	0.0784823	1	0.00454372	1	-0.00526807	1	0.0336408	1	0.14296	1	0.245151	1	-0.219716	1	0.087034	1	0.0295426	1	-0.175176	1	-0.0329186	0.0697554	FALSE	FALSE	-0.105418	1.08312e-125	FALSE
Abi1	0.360884	1	0.0579415	1	0.219493	1	-0.0285617	1	0.346733	1	0.0527554	1	0.0024984	1	0.114378	1	0.2473	1	-0.00802305	0.000134926	0.118838	1	0.145516	1	-0.131914	1	0.125001	1	0.0682057	1	0.0129199	1	0.043428	1	-0.192758	1	-0.0111181	1	-0.0233105	1	0.00851968	1	0.0727964	0.999613	FALSE	FALSE	0.113535	1	FALSE
Abi2	-0.0583404	1	0.222908	1	-0.0218684	1	-0.228387	1	0.0253303	1	0.0322257	1	0.0260825	1	-0.15501	1	-0.0073756	1	-0.0164371	4.62929e-12	0.0493841	1	-0.129554	1	0.0460541	1	-0.0954307	0.541549	-0.024286	1	-0.473494	1	0.00326401	1	-0.187043	1	-0.0723198	1	-0.0712645	1	-0.0670854	1	-0.0572689	0.11126	FALSE	FALSE	-0.0301732	4.47574e-62	FALSE
Abl1	-0.0268548	1	-0.127026	1	0.0667798	1	-0.132888	1	-0.135098	1	0.0454052	1	0.015025	1	0.0493442	1	-0.101128	1	-0.0166687	1.10311e-11	0.0520203	1	-0.0644111	1	-0.093298	1	-0.0733052	0.201008	0.0573575	1	-0.0473063	1	0.136057	1	0.152852	1	0.0336242	1	-0.04869	1	-0.103431	1	-0.017221	0.106998	FALSE	FALSE	0.0404918	1.00145e-15	FALSE
Abl2	0.143462	1	-0.187052	1	0.0361347	1	0.152455	1	-0.278785	1	0.129881	1	0.00462574	1	-0.196171	1	0.0151974	1	-0.0525885	7.06117e-12	-0.00912579	1	0.223431	1	-0.156598	1	-0.00854184	1	0.0767528	1	0.137852	1	0.161002	1	-0.372919	1	0.0452524	1	-0.129654	1	0.0163501	1	-0.0118589	0.152723	FALSE	FALSE	-0.0160416	9.22941e-33	FALSE
Abr	-0.0204248	1	0.0785383	1	-0.164945	1	-0.149658	1	0.36024	1	0.0924344	1	0.0162027	1	0.167004	1	0.0711442	1	-0.0341141	4.78887e-09	0.0465689	1	-0.130211	1	-0.0068412	1	0.0190526	1	0.103252	1	-0.121741	1	-0.0906086	1	0.336318	1	0.00665781	1	-0.00972819	1	0.0102422	1	0.0275898	0.633533	FALSE	FALSE	0.0190902	1.66843e-26	FALSE
Abracl	-0.0691143	1	-0.102023	1	0.0987633	1	-0.0741125	1	0.472274	1	0.0995225	1	-0.121596	1	-0.298075	1	-0.1616	1	-0.100008	2.84639e-05	-0.185128	1	-0.202686	1	-0.316144	1	-0.197342	1	-0.352507	1	-0.140043	1	-0.113198	1	-0.152446	1	-0.165363	1	-0.155754	1	-0.162381	1	-0.114236	0.99731	FALSE	FALSE	-0.101279	3.71501e-28	FALSE
Abraxas1	0.0675229	1	0.0153318	1	-0.00913686	1	0.090208	1	-0.0140108	1	0.047031	1	0.045522	1	0.0392757	1	0.0594288	1	0.00159248	0.00502413	-0.0015804	1	-0.0526262	1	0.0642832	1	0.0662773	1	0.0115732	1	0.0356622	1	0.161935	1	0.0796491	1	-0.00319025	1	0.0729108	1	-0.102313	1	0.0321594	1	FALSE	FALSE	0.0134237	2.01835e-18	FALSE
Abraxas2	0.0791619	1	-0.0063028	1	0.0680515	1	0.194887	1	0.0854732	1	0.0501686	1	0.0705202	1	0.0629598	1	0.0854223	1	0.0272348	0.00609949	-6.46267e-05	1	0.0316653	1	-0.0563718	1	0.0236066	1	0.000923615	1	0.120504	1	0.0577173	1	0.143171	1	-0.0918197	1	-0.269133	1	-0.0362306	1	0.0305497	1	FALSE	FALSE	0.0269409	5.84238e-24	FALSE
Abt1	-0.0484928	1	0.0295038	1	0.143015	1	0.123894	1	0.00286386	1	-0.0255295	1	-0.189134	0.0615384	0.0698	1	-0.234211	1	-0.00831043	1.46731e-09	-0.00910169	1	-0.0210968	1	0.026303	1	0.0151393	1	-0.176526	1	0.00352674	1	-0.209882	1	0.144249	1	-0.141803	1	-0.119564	1	-0.234184	1	-0.0409306	0.300918	FALSE	FALSE	0.0195895	3.36693e-26	FALSE
AC127341.3	-0.0993808	1	0.145601	1	-0.0246497	1	-0.0480928	1	-0.240953	1	-0.112785	0.714122	-0.0527987	1	-0.0419016	1	-0.0699965	1	0.012996	0.0027328	-0.0108836	1	0.0413268	1	0.0762101	1	0.127807	1	0.0751374	1	0.154879	1	-0.0144411	1	-0.12757	1	-0.0260687	1	-0.243872	1	-0.0839805	1	-0.0268294	0.999997	FALSE	FALSE	-0.0699146	4.34139e-86	FALSE
AC149090.1	0.0849254	1	0.424648	1	0.202476	1	-0.0107512	1	-0.106812	1	-0.0432417	1	0.0284412	1	-0.243037	1	-0.135008	1	-0.00547162	0.00010683	-0.0416425	1	0.156458	1	0.312773	1	0.166213	1	0.299906	1	0.0753284	1	0.15244	1	-0.0328814	1	0.0775674	1	0.131226	1	-0.0763376	1	0.0674866	0.999464	FALSE	FALSE	0.0471875	5.85472e-19	FALSE
Acaa1a	0.0839496	1	-0.080745	1	-0.0157329	1	0.193155	1	-0.036364	1	0.0323252	1	-0.0332449	1	0.0190553	1	0.0197358	1	0.00157964	3.26483e-06	0.0135074	1	-0.0227451	1	0.00708134	1	0.00494955	1	-0.0155269	1	-0.047518	1	-0.120485	1	0.0900509	1	-0.128975	1	-0.0400291	1	0.0270036	1	-0.00233206	0.980863	FALSE	FALSE	0.00534875	1.0656e-27	FALSE
Acaa2	-0.0777357	1	-0.24491	1	0.196358	1	0.240611	1	0.691178	1	0.184821	1	-0.200237	1	0.552753	1	0.125608	1	0.0163809	0.105647	0.0225923	1	0.0748875	1	-0.106849	1	0.238906	1	-0.0876405	1	0.251923	1	0.420768	1	0.267197	1	0.0464296	1	-0.106422	1	0.283089	1	0.132843	1	FALSE	FALSE	0.0359464	3.1726e-11	FALSE
Acaca	-0.0569685	1	-0.0121242	1	-0.0430217	1	0.0998374	1	-0.160735	1	-0.0466383	1	-0.138855	0.173451	-0.293726	0.770928	0.0634058	1	-0.0428147	5.98777e-16	-0.0365527	1	0.0339911	1	-0.0932218	1	-0.0235867	1	0.0200575	1	-0.0264627	1	-0.107432	1	-0.0228986	1	-0.0545998	1	0.0219119	1	0.0239968	1	-0.0426875	0.00161904	FALSE	FALSE	-0.0360792	1.70768e-65	FALSE
Acad8	0.0760329	1	-0.00848482	1	-0.057238	1	0.0499014	1	0.222996	1	-0.0618602	1	0.00216768	1	-0.0671797	1	0.0765268	1	-0.00658897	5.69057e-07	0.000165416	1	-0.02262	1	0.148579	1	-0.0538119	1	-0.0168716	1	0.217725	1	0.092473	1	-0.0462338	1	0.031441	1	-0.00321851	1	0.0825241	1	0.0312583	0.940344	FALSE	FALSE	-0.00573787	1.58414e-36	FALSE
Acad9	0.0350527	1	0.209051	1	0.11049	1	0.0757008	1	0.0862012	1	0.0525034	1	-0.00914938	1	-0.196243	1	0.026319	1	-0.00211544	1.65777e-08	-0.0294317	1	-0.0217047	1	0.0389098	1	0.0212122	1	0.028013	1	0.115378	1	0.0801853	1	0.0211071	1	0.0664899	1	0.0202343	1	-0.199277	1	0.025187	0.737455	FALSE	FALSE	0.00428394	4.24108e-38	FALSE
Acadl	0.28232	1	-0.229244	1	0.0235126	1	0.293453	1	-0.4132	1	0.0310717	1	0.141916	1	0.171006	1	-0.212918	1	0.0617907	1	0.142363	1	-0.339894	1	-0.133309	1	0.165688	1	0.0375915	1	-0.0912618	1	0.173612	1	0.410124	1	0.0652527	1	0.220515	1	0.100497	1	0.0428994	1	FALSE	FALSE	0.0582676	1	FALSE
Acadm	0.0232858	1	0.0694075	1	0.119399	1	0.0431042	1	0.163706	1	0.181211	1	-0.058533	1	-0.0349567	1	0.0364061	1	0.0124726	0.21041	0.174834	1	0.0137208	1	0.167458	1	0.186812	1	0.309001	1	-0.136618	1	0.281288	1	0.35725	1	0.295189	1	0.185377	1	0.0835629	1	0.11778	1	FALSE	FALSE	0.0124832	1.33677e-13	FALSE
Acads	0.0594319	1	-0.202755	1	0.267851	1	-0.121235	1	-0.170203	1	0.101608	1	-0.00431344	1	0.437493	1	0.0482726	1	0.0501376	1	0.0336098	1	0.0640602	1	-0.0793606	1	-0.150018	1	-0.0342599	1	0.15386	1	0.208596	1	-0.190828	1	-0.13586	1	0.0919014	1	0.059521	1	0.0232147	1	FALSE	FALSE	0.114504	1	FALSE
Acadsb	-0.116577	1	0.0563589	1	-0.0541379	1	-0.0274435	1	-0.0308848	1	-0.0140312	1	0.00732635	1	-0.0844964	1	0.11723	1	-0.0119646	3.74088e-09	0.0823409	1	0.163017	1	0.0416303	1	0.0583676	1	0.00172116	1	-0.409269	1	-0.0575274	1	0.00896162	1	0.0749012	1	-0.150154	1	-0.0362609	1	-0.0181376	0.611885	FALSE	FALSE	0.0255605	9.30864e-31	FALSE
Acadvl	0.0804881	1	-0.250231	1	-0.192983	1	-0.0885365	1	-0.219331	1	0.042996	1	0.0131922	1	-0.0109566	1	-0.0677968	1	-0.0455377	9.08163e-14	-0.0373583	1	0.128822	1	0.0216144	1	-0.0666947	1	0.0689557	1	-0.0130016	1	0.194394	1	0.412915	1	-0.0217284	1	-0.0257661	1	0.11615	1	0.00188595	0.0348851	FALSE	FALSE	-0.00525333	1.04153e-39	FALSE
Acap2	-0.141215	1	0.462638	1	-0.00344589	1	0.142652	1	0.202579	1	0.0855407	1	0.08565	1	-0.00550891	1	0.0711816	1	0.00211849	6.90393e-06	-0.00766845	1	-0.0838602	1	0.0164827	1	-0.0518411	1	-0.0445837	1	0.187522	1	0.203244	1	0.0709586	1	0.0867787	1	0.225235	1	-0.0163341	1	0.070863	0.989488	FALSE	FALSE	0.0424091	8.46818e-16	FALSE
Acat1	0.08714	1	0.134107	1	-0.147185	1	0.0806939	1	-0.183592	1	0.0745526	1	0.0401979	1	0.00755272	1	-0.135981	1	0.0110384	0.000266363	0.0806183	1	0.0590081	1	0.118009	1	0.0137106	1	0.0193533	1	0.124193	1	0.217391	1	0.230108	1	-0.104226	1	-0.0603156	1	-0.101098	1	0.026918	0.999862	FALSE	FALSE	0.0221687	1.79401e-26	FALSE
Acat2	0.0910867	1	0.161086	1	-0.240026	1	0.039965	1	0.0582439	1	0.0383873	1	-0.0556036	1	0.120077	1	0.0714173	1	0.0107572	0.000238753	0.00929197	1	0.0545218	1	0.0260612	1	-0.0517279	1	0.0498904	1	-0.108603	1	-0.0169574	1	0.111956	1	0.0108347	1	-0.0748279	1	-0.00283527	1	0.0144284	0.999836	FALSE	FALSE	-0.0193686	1.84767e-45	FALSE
Acbd3	0.0736515	1	-0.0175936	1	0.112299	1	0.0994092	1	-0.0947748	1	-0.151465	1	0.0931923	1	-0.0977809	1	-0.0546637	1	-0.0222566	0.0149595	0.0042155	1	0.138891	1	-0.293721	1	0.109868	1	0.00441516	1	-0.035621	1	0.0330316	1	0.0981262	1	-0.0925975	1	-0.099241	1	-0.107189	1	-0.0142764	1	FALSE	FALSE	-0.0230788	9.55243e-18	FALSE
Acbd5	0.188622	1	0.231462	1	0.205579	1	-0.0820331	1	-0.0213082	1	0.0732333	1	0.0851832	1	-0.0827074	1	-0.0169047	1	-0.0314315	6.96882e-12	-0.0557575	1	0.19267	1	0.041361	1	0.0567659	1	0.0541628	1	0.16892	1	0.0413311	1	0.181578	1	-0.030192	1	-0.0293371	1	0.138396	1	0.0623615	0.152131	FALSE	FALSE	0.0560619	3.49182e-12	FALSE
Acbd6	-0.188541	1	-0.224838	1	-0.0295208	1	-0.318977	1	-0.0219653	1	-0.0863999	1	-0.0152212	1	-0.0859488	1	-0.102046	1	-0.0499005	0.0097181	-0.0496651	1	-0.243734	1	-0.217814	1	-0.127564	1	0.0795338	1	0.0355698	1	-0.164701	1	-0.375878	1	0.00799213	1	0.192639	1	-0.101835	1	-0.0994675	1	FALSE	FALSE	-0.0568202	2.09722e-22	FALSE
Acd	0.0363596	1	0.140153	1	-0.0347781	1	0.297014	1	0.00856043	1	-0.0404698	1	0.0634131	1	0.0172671	1	0.0125013	1	0.0281382	0.000241276	-0.006734	1	-0.155801	1	-0.0216397	1	-0.164889	0.000232028	0.101332	1	-0.274252	1	-0.00949399	1	0.0062312	1	-0.126636	1	-0.0518296	1	-0.25501	1	-0.020503	0.825784	FALSE	FALSE	-0.0265197	2.06643e-60	FALSE
Acer3	0.0302868	1	-0.00854444	1	-0.157704	1	0.103371	1	-0.144159	1	-0.0164954	1	-0.0478233	1	0.156123	1	-0.0102142	1	-0.0123976	2.9464e-08	0.037341	1	-0.16563	1	0.104461	1	0.0799158	1	0.0326946	1	0.0520673	1	-0.106989	1	0.0476345	1	0.0210659	1	0.0287632	1	-0.0995248	1	-0.00360757	0.781272	FALSE	FALSE	-0.0457223	1.00768e-73	FALSE
Acin1	0.327736	1	-0.21803	1	-0.150859	1	-0.175479	1	0.160561	1	-0.0169046	1	-0.0889562	1	-0.0985756	1	0.0230229	1	-0.0601789	0.0108978	-0.21702	1	0.157045	1	0.0144868	1	0.0064973	1	0.202432	1	-0.104131	1	-0.062394	1	-0.314758	1	-0.275292	1	-0.131925	1	-0.278581	1	-0.0619669	1	FALSE	FALSE	-0.050318	8.43218e-16	FALSE
Acly	-0.0215953	1	-0.161741	1	0.045725	1	-0.070639	1	0.135984	1	0.0683026	1	-0.0237959	1	-0.212662	1	-0.100556	1	-0.00866494	1.67763e-08	-0.0325364	1	0.0393369	1	0.0354056	1	-0.0674408	1	-0.0521381	1	0.0552926	1	0.102852	1	0.0836808	1	-0.0343055	1	-0.023092	1	-0.0729816	1	-0.0150271	0.738395	FALSE	FALSE	0.0226307	4.15229e-27	FALSE
Aco1	0.197724	1	0.0324495	1	-0.0226832	1	-0.0570164	1	0.237574	1	0.0361672	1	-0.00147687	1	-0.0292929	1	-0.115408	1	-0.0158019	5.09949e-07	-0.016798	1	-0.156979	1	-0.0181308	1	0.0755948	1	0.245899	1	0.0472714	1	0.0530587	1	0.129945	1	-0.018209	1	-0.0450722	1	-0.0175976	1	0.0257722	0.936601	FALSE	FALSE	-0.0180313	5.37704e-50	FALSE
Aco2	0.111173	1	0.264011	1	0.161024	1	-0.0446999	1	-0.113348	1	0.000804799	1	0.195146	1	0.15956	1	0.0605494	1	0.0262814	1	-0.0316339	1	0.0543962	1	-0.002147	1	0.0214647	1	-0.000977209	1	0.122457	1	0.0192061	1	0.198377	1	0.0471412	1	0.148593	1	0.0200303	1	0.0674957	1	FALSE	FALSE	0.125522	1	FALSE
Acot13	0.0375839	1	0.0860866	1	0.00807754	1	-0.0153323	1	0.102282	1	0.0221851	1	0.0852044	1	0.127505	1	-0.148749	1	0.038094	0.0311203	0.0903912	1	0.0525903	1	-0.0463907	1	-0.0240013	1	-0.0312437	1	-0.0156698	1	-0.0903078	1	0.0595295	1	0.0168602	1	0.123213	1	-0.0154718	1	0.0220208	1	FALSE	FALSE	0.0938651	0.013503	FALSE
Acot2	-0.094747	1	0.0658534	1	-0.0408901	1	0.167935	1	0.0493921	1	0.0633693	1	0.0545559	1	-0.0337345	1	-0.0248309	1	-0.00815556	2.34554e-08	-0.00924234	1	0.0234104	1	-0.207073	1	-0.00798485	1	-0.045822	1	0.0124927	1	0.122093	1	-0.0243936	1	0.0077628	1	0.0835712	1	-0.0213363	1	0.00629645	0.764304	FALSE	FALSE	0.00171245	4.78901e-28	FALSE
Acot7	-0.0227054	1	0.0746321	1	0.296097	1	-0.235574	1	0.234599	1	0.0566622	1	-0.0386932	1	-0.233835	1	-0.197413	1	0.027979	1	0.0210046	1	-0.0498286	1	-0.0535792	1	0.0114295	1	-0.0681147	1	0.0315533	1	-0.21795	1	0.201575	1	-0.0685946	1	-0.281116	1	-0.0835388	1	-0.0283529	1	FALSE	FALSE	-0.161792	3.96737e-83	FALSE
Acot8	-0.0572434	1	-0.0154084	1	-0.0598367	1	-0.015293	1	-0.124805	1	-0.0335813	1	-0.0925543	0.952348	-0.103778	1	-0.0112139	1	0.00971088	4.85531e-06	0.0251759	1	0.038792	1	0.0536908	1	-0.0179564	1	0.0431102	1	0.286871	1	-0.00917937	1	-0.0211819	1	0.0519826	1	-0.0113045	1	-0.0852691	1	-0.0071082	0.985378	FALSE	FALSE	0.0244773	1.0797e-14	FALSE
Acot9	0.0310228	1	-0.164728	1	0.10392	1	-0.316442	1	-0.28798	1	-0.0368021	1	-0.0357497	1	0.51569	1	-0.0873642	1	-0.0115656	1	0.0382517	1	0.185832	1	0.207097	1	0.100575	1	-0.223899	1	-0.081267	1	-0.0101631	1	0.0171266	1	-0.109574	1	-0.31993	1	-0.037223	1	-0.0249129	1	FALSE	FALSE	0.0230582	1.28669e-05	FALSE
Acox1	-0.0185613	1	-0.127923	1	0.221855	1	0.142437	1	0.039762	1	0.0723166	1	0.128923	1	0.164022	1	-0.095839	1	0.0240933	0.00325849	0.164373	1	0.136148	1	0.0146614	1	0.162093	1	0.230227	1	0.121591	1	0.0218974	1	-0.192335	1	0.0658863	1	0.106111	1	0.0786407	1	0.0695419	0.999999	FALSE	FALSE	0.0866149	2.19035e-05	FALSE
Acp1	-0.043394	1	0.213441	1	-0.245853	1	-0.192043	1	0.278298	1	0.216447	1	0.00894566	1	-0.277032	1	0.219359	1	0.00337841	1	-0.00676769	1	-0.156573	1	-0.120015	1	0.080623	1	-0.0787318	1	0.129623	1	-0.08522	1	0.113247	1	-0.0986912	1	0.0438689	1	0.324313	1	0.0155822	1	FALSE	FALSE	-0.00526553	0.471874	FALSE
Acp6	0.0571517	1	0.0129534	1	-0.127109	1	0.240735	1	0.0655477	1	-0.0518946	1	-0.0581308	1	0.0558914	1	-0.01189	1	-0.0316106	8.9494e-11	0.0487119	1	0.00124501	1	-0.0890706	1	-0.0794601	0.729118	-0.0293001	1	-0.233558	1	-0.0153473	1	-0.00637368	1	-0.0341685	1	0.0122946	1	-0.144735	1	-0.0199104	0.278315	FALSE	FALSE	-0.0375891	2.02282e-65	FALSE
Acsl3	-0.155001	1	0.144137	1	-0.17064	1	0.0790053	1	-0.225253	1	-0.0568349	1	0.0141678	1	-0.341392	1	-0.068784	1	-0.114567	1.70047e-28	0.0351134	1	-0.0194516	1	-0.230877	1	-0.250823	0.782599	-0.117107	1	-0.219742	1	-0.214311	1	-0.0690241	1	-0.153151	1	-0.0901718	1	-0.0720597	1	-0.10937	1.10882e-10	FALSE	FALSE	-0.110611	8.50258e-119	FALSE
Acsl4	0.0865902	1	0.0400647	1	-0.21542	1	0.236331	1	0.257009	1	0.150441	1	-0.0299353	1	0.400942	1	0.0827228	1	-0.0606781	3.5793e-13	0.0698358	1	0.146795	1	-0.164534	1	0.0389286	1	-0.0130066	1	-0.0782975	1	0.07304	1	-0.227801	1	-0.0815741	1	0.0453555	1	-0.063638	1	0.0330082	0.0578013	FALSE	FALSE	0.0112872	3.01413e-24	FALSE
Acsl5	0.00311409	1	-0.00243772	1	-0.0120576	1	-0.19317	1	0.0318131	1	-0.0415729	1	-0.0925531	1	-0.390473	1	-0.0215779	1	-0.037976	7.1363e-14	-0.0710638	1	0.0496809	1	-0.217803	1	-0.157528	1	-0.00646711	1	-0.116266	1	0.199994	1	0.114272	1	0.0503486	1	0.0940239	1	-0.00381157	1	-0.0391196	0.0318105	FALSE	FALSE	-0.0542853	8.33243e-68	FALSE
Actb	0.188989	1	-0.0953186	1	0.110937	1	0.0144082	1	-0.0490711	1	-0.104514	1	0.296749	1	-0.00446745	1	0.182116	1	0.100768	4.35067e-05	0.0200092	1	0.0181021	1	-0.0647448	1	-0.0129454	1	0.043324	1	0.214481	1	0.145214	1	0.377879	1	-0.100627	1	-0.131095	1	0.0623042	1	0.057738	0.998331	FALSE	FALSE	0.0994036	1.14325e-16	FALSE
Actl6a	-0.117428	1	0.333554	1	0.0348683	1	0.0608959	1	-0.0817021	1	-0.0363184	1	-0.243601	0.617961	-0.31191	1	0.0104457	1	-0.0223697	0.0567459	0.0712268	1	-0.0849026	1	-0.0821782	1	-0.225562	1	-0.105389	1	-0.104345	1	0.209511	1	-0.235236	1	-0.161027	1	-0.149338	1	-0.0831228	1	-0.0630442	1	FALSE	FALSE	-0.0602249	1.97003e-31	FALSE
Actn1	0.0747871	1	0.0154994	1	0.0826846	1	-0.109594	1	0.11007	1	0.471202	0.280917	-0.0715086	1	-0.379437	1	0.0187831	1	-0.116069	2.20816e-07	0.0408237	1	-0.131615	1	-0.170656	1	-0.128349	1	0.173994	1	0.130046	1	-0.0775693	1	0.176553	1	-0.221839	1	-0.033366	1	0.133261	1	-0.000585687	0.832421	FALSE	FALSE	-0.0206426	4.15953e-10	FALSE
Actn4	0.00860005	1	-0.287814	1	0.315195	1	-0.00483846	1	0.0698836	1	0.517572	0.000161163	-0.000336164	1	-0.0615281	1	-0.00681019	1	0.0216801	1	0.0149158	1	-0.0411166	1	0.0802623	1	0.180694	1	0.0408166	1	0.250303	1	0.206542	1	-0.23492	1	0.266532	1	0.0392356	1	-0.0444853	1	0.0633516	0.999701	FALSE	FALSE	-1.38904e-05	4.58413e-05	FALSE
Actr10	0.17405	1	-0.379729	1	-0.17753	1	-0.0556652	1	0.088053	1	-0.0716689	1	-0.124779	1	-0.57695	1	0.124602	1	-0.0567804	0.00322226	-0.0641898	1	-0.0646042	1	-0.206038	1	-0.173306	1	-0.123332	1	-0.0109671	1	-0.0686078	1	0.21917	1	-0.173276	1	-0.199292	1	-0.0748109	1	-0.095031	0.999999	FALSE	FALSE	-0.106153	2.92834e-38	FALSE
Actr1a	0.0420651	1	-0.0224971	1	0.0602358	1	0.0574448	1	0.162248	1	0.00265635	1	0.0148134	1	-0.223192	1	0.0505338	1	-0.0568419	1.56901e-19	0.0747548	1	-0.197015	1	-0.12262	1	-0.00235506	1	0.0913322	1	0.237502	1	-0.0647751	1	-0.272279	1	-0.0299457	1	0.0559165	1	0.125398	1	-0.000791464	6.22796e-05	FALSE	FALSE	-0.0355849	1.51809e-64	FALSE
Actr1b	0.0100861	1	-0.0230022	1	0.0200358	1	-0.00765318	1	-0.224962	1	-0.129785	1	-0.052688	1	-0.312036	1	-0.0441538	1	-0.0637066	1.57646e-17	-0.00922333	1	-0.272696	0.272056	0.0478515	1	-0.197673	1	-0.141239	1	-0.158144	1	0.0255584	1	-0.037351	1	-0.0713629	1	-0.0822099	1	0.0237324	1	-0.080982	0.000370127	FALSE	FALSE	-0.0743033	1.01415e-70	FALSE
Actr6	-0.153391	1	0.100079	1	0.083611	1	0.227302	1	0.0336032	1	-0.0370132	1	-0.0225624	1	-0.14342	1	0.136966	1	-0.0318307	4.20455e-14	0.0332676	1	0.00309532	1	0.0968457	1	0.042435	1	-0.0501205	1	0.100483	1	0.0112492	1	0.0920111	1	-0.0872311	1	0.0300361	1	-0.0743045	1	0.0186243	0.0258874	FALSE	FALSE	-0.0328758	3.97015e-60	FALSE
Actr8	0.0515721	1	0.242231	1	0.104889	1	0.0989165	1	0.505284	1	0.0219962	1	0.0348851	1	0.0570007	1	-0.0128119	1	0.0373752	0.827948	0.111739	1	0.0167511	1	0.0973437	1	-0.0311555	1	0.0835296	1	0.0662764	1	0.0525845	1	-0.0163723	1	0.00606221	1	-0.0078509	1	-0.0548787	1	0.0697793	1	FALSE	FALSE	0.025337	3.76271e-27	FALSE
Acvr1	-0.084608	1	-0.292811	1	-0.0262264	1	0.414064	1	-0.0814309	1	-0.0335922	1	-0.103801	1	0.121825	1	-0.0719417	1	-0.0638938	8.39433e-24	0.0276043	1	-0.0520427	1	0.0480343	1	-0.0492451	1	0.0235955	1	-0.21094	1	-0.14707	1	0.102377	1	-0.042666	1	-0.225562	1	-0.012183	1	-0.036215	1.75102e-07	FALSE	FALSE	-0.000603798	7.20153e-43	FALSE
Acyp1	0.0358893	1	0.00987563	1	0.0379407	1	-0.249737	1	0.144659	1	-0.127367	1	-0.0197302	1	0.205966	1	0.174707	1	-0.0720882	2.31921e-23	-0.0384048	1	0.108942	1	0.0417511	1	0.0325206	1	-0.22083	1	0.0311135	1	-0.26272	1	0.0549577	1	-0.207942	1	-0.153723	1	-0.175041	1	-0.0309172	3.32366e-07	FALSE	FALSE	-0.0535237	5.18988e-83	FALSE
Acyp2	0.0751028	1	-0.0398989	1	0.0129919	1	-0.0496307	1	0.149217	1	-0.00804197	1	-0.096731	1	-0.0407972	1	0.0430846	1	-0.054964	7.70484e-19	-0.0477314	1	-0.0822192	1	-0.0826919	1	-0.0577662	1	-0.115538	1	-0.124761	1	-0.040066	1	0.140927	1	0.0697434	1	0.00772459	1	-0.051252	1	-0.0187285	0.000148873	FALSE	FALSE	-0.0268329	1.0033e-53	FALSE
Adam10	-0.0525125	1	0.199857	1	-0.00689417	1	0.062875	1	0.0504418	1	0.0459558	1	0.0692237	1	0.0786725	1	0.0268731	1	-0.0255655	8.38105e-13	0.0513071	1	0.0341919	1	0.0463856	1	0.116452	1	0.0567788	1	0.166491	1	-0.0610225	1	0.168976	1	0.127144	1	0.0690304	1	-0.0113401	1	0.0577771	0.077671	FALSE	FALSE	0.0444388	1.94086e-21	FALSE
Adam15	0.17086	1	-0.168774	1	0.0599005	1	0.144274	1	-0.0439628	1	0.0691738	1	-0.171983	1	0.00541613	1	0.187774	1	0.0218411	0.00109397	-0.0128012	1	-0.0716967	1	0.076467	1	-0.0375647	1	0.109071	1	-0.0131844	1	-0.0178686	1	-0.205032	1	0.0101205	1	0.0597299	1	0.0341137	1	0.00980361	0.99999	FALSE	FALSE	-0.00358132	7.39057e-45	FALSE
Adam17	0.134793	1	-0.0947768	1	0.0370663	1	0.381458	1	0.136348	1	0.105364	1	0.0400768	1	-0.119835	1	0.141382	1	-0.0121336	1.32327e-09	0.0114211	1	0.0371788	1	0.0969219	1	0.11056	1	0.10153	1	-0.0763872	1	-0.0804754	1	-0.0394815	1	-0.104122	1	-0.00245921	1	0.17462	1	0.0466215	0.519788	FALSE	FALSE	-0.00651148	2.37945e-43	FALSE
Adam9	-0.057568	1	0.00613829	1	-0.0159912	1	-0.0842528	1	0.0870707	1	-0.0294018	1	-0.0533191	1	0.12035	1	-0.0475739	1	-0.0352824	2.44318e-14	-0.0370309	1	-0.0884451	1	-0.00710781	1	-0.0891697	1	-0.112798	1	-0.0976437	1	-0.0157447	1	-0.017863	1	0.0408938	1	-0.0282636	1	-0.0416377	1	-0.0287924	0.02085	FALSE	FALSE	-0.033329	5.00337e-61	FALSE
Adamts1	-0.0339154	1	0.275884	1	-0.125129	1	0.259472	1	-0.0990664	1	0.0994925	1	0.0770818	1	-0.142321	1	0.0492324	1	0.0741297	1	0.0365253	1	0.0646652	1	-0.120734	1	-0.0754911	1	0.122382	1	0.239703	1	0.00821213	1	-0.0530129	1	0.175221	1	-0.191605	1	0.0766133	1	0.034159	1	FALSE	FALSE	0.0120186	1.44431e-22	FALSE
Adamts4	-0.0267629	1	-0.266224	1	0.238521	1	0.215854	1	0.216505	1	0.0827649	1	0.0161691	1	0.15229	1	0.0982333	1	-0.0788776	3.96523e-11	0.307877	1	-0.0615506	1	-0.0799394	1	-0.00476925	1	-0.208455	1	0.0915176	1	-0.0689098	1	-0.0248089	1	0.167253	1	-0.482814	1	-0.149647	1	0.00639166	0.245716	FALSE	FALSE	-0.0483449	2.24413e-41	FALSE
Adar	0.0580589	1	0.170286	1	0.0801567	1	-0.125817	1	0.296819	1	0.138251	1	0.0169114	1	0.100288	1	0.0273519	1	-0.00369802	8.07562e-06	-0.0253068	1	-0.045118	1	0.0657092	1	0.0446205	1	-0.0546286	1	0.0594773	1	0.0670625	1	0.0366182	1	0.0887738	1	-0.0594044	1	0.0862148	1	0.0486965	0.990818	FALSE	FALSE	0.0340263	2.15635e-13	FALSE
Adarb1	0.0139069	1	-0.126256	1	0.00813757	1	0.0155577	1	0.0824677	1	0.0230209	1	0.0352571	1	-0.106661	1	0.003199	1	-0.0273017	6.88951e-06	0.0528906	1	-0.0832316	1	-0.128387	1	-0.0608814	0.662512	-0.0351999	1	-0.0724506	1	-0.211724	1	-0.0315983	1	-0.00497215	1	-0.0750689	1	0.0811242	1	-0.0308652	0.985226	FALSE	FALSE	0.00332111	1.11804e-19	FALSE
Adat2	-0.0334946	1	-0.0477988	1	-0.103345	1	-0.196861	1	0.0571061	1	-0.0334768	1	0.0273725	1	0.100808	1	-0.0589025	1	0.0067299	0.00975052	0.0100696	1	0.088714	1	0.0702131	1	-0.101369	0.204577	-0.171137	1	-0.0922843	1	-0.210629	0.853213	0.00764954	1	0.0243988	1	0.158234	1	-0.00968581	1	-0.0241757	0.999996	FALSE	FALSE	0.0151202	6.86467e-27	FALSE
Adck5	0.0385679	1	-0.0706381	1	-0.116751	1	0.233826	1	-0.066236	1	-0.0109603	1	0.0714227	1	0.0169344	1	0.11952	1	0.0674861	1	0.0283093	1	0.165728	1	0.0194445	1	-0.0166714	1	-0.142528	1	0.205828	1	0.00417483	1	0.0336799	1	-0.0145326	1	-0.102564	1	0.0328037	1	0.0236592	1	FALSE	FALSE	0.0601875	2.14875e-05	FALSE
Add1	-0.144415	1	0.332468	1	0.110148	1	-0.172048	1	0.338853	1	0.15561	1	-0.0708435	1	0.114612	1	0.0601407	1	-0.0176226	0.0260643	0.210396	1	-0.0393733	1	0.203275	1	0.00661539	1	0.132042	1	-0.0818299	1	0.0733665	1	0.214582	1	0.116424	1	0.140866	1	0.116167	1	0.0856873	1	FALSE	FALSE	0.0561355	1	FALSE
Add3	0.025286	1	0.0130464	1	-0.157884	1	0.166578	1	-0.229095	1	-0.00339664	1	-0.00527187	1	0.0757636	1	0.0642682	1	-0.0161618	1.29739e-10	0.0469538	1	-0.00577156	1	0.000842769	1	0.0480667	1	-0.010253	1	-0.0555102	1	-0.184937	1	0.00989385	1	-0.0280876	1	-0.00278505	1	0.0112994	1	-0.0112931	0.327332	FALSE	FALSE	-0.0100824	6.64464e-41	FALSE
Adgra3	-0.0993217	1	-0.0638639	1	0.0179136	1	-0.0120934	1	0.171743	1	-0.0453329	1	-0.00243171	1	-0.153598	1	0.0943911	1	-0.0250884	2.49308e-14	-0.0234351	1	0.0465694	1	-0.0999426	1	0.0820195	1	0.0534614	1	-0.115012	1	0.199345	1	0.0902214	1	0.0787588	1	-0.0768205	1	-0.202018	0.666461	-0.00402546	0.0178263	FALSE	FALSE	-0.0317121	2.65544e-65	FALSE
Adgrl3	0.0536733	1	-0.000914362	1	-0.26045	1	0.160908	1	-0.51179	1	0.00616218	1	0.0604607	1	0.0450049	1	0.0158177	1	-0.111928	4.55287e-27	-0.0479938	1	-0.131988	1	-0.158674	1	-0.0724032	1	-0.268584	1	0.0148599	1	-0.000781514	1	-0.273713	1	0.00893195	1	-0.16002	1	-0.149754	1	-0.0849131	1.25379e-09	FALSE	FALSE	-0.102457	2.62514e-89	FALSE
Adh5	-0.0745394	1	-0.097007	1	-0.166816	1	0.171135	1	-0.139261	1	-0.0792777	1	-0.039853	1	-0.020835	1	-0.17185	1	0.00904871	1	0.0283894	1	-0.199434	1	0.15796	1	-0.194864	1	0.129067	1	-0.256509	1	0.0725084	1	-0.0152454	1	-0.157303	1	0.190208	1	-0.169642	1	-0.0487676	1	FALSE	FALSE	-0.0605457	1.71818e-19	FALSE
Adipor1	0.161029	1	0.0303511	1	0.0695504	1	-0.391197	1	0.00631547	1	0.05638	1	0.0623348	1	-0.330645	1	-0.0818049	1	-0.011014	0.00068415	-0.089583	1	0.180202	1	-0.0614158	1	-0.00519597	1	0.0417967	1	-0.239142	1	-0.316661	1	0.0523163	1	0.309221	1	-0.0898201	1	-0.223895	1	-0.0414704	0.999974	FALSE	FALSE	-0.06121	3.75434e-39	FALSE
Adipor2	-0.0339388	1	-0.00728924	1	-0.177802	1	0.224785	1	-0.107312	1	0.0079291	1	0.0014863	1	-0.0413794	1	-0.145234	1	-0.0146791	6.25645e-11	0.0239478	1	-0.0908299	1	-0.0661697	1	-0.0178199	1	-0.100977	1	-0.0599211	1	0.015476	1	0.193437	1	0.245743	1	-0.186316	1	0.0148339	1	-0.0153348	0.275465	FALSE	FALSE	-0.0249375	1.71358e-58	FALSE
Adk	0.0521777	1	-0.240159	1	-0.197128	1	0.00537528	1	0.0459076	1	-0.147472	1	-0.180076	0.0637717	-0.0445052	1	0.107361	1	-0.0316007	1.71209e-11	-0.151902	1	0.108512	1	-0.0539372	1	-0.0320613	1	-0.120055	1	0.243616	1	-0.0192941	1	0.14412	1	0.00299691	1	-0.123594	1	-0.164312	1	-0.0379062	0.0848972	FALSE	FALSE	-0.119491	2.75501e-92	FALSE
Adnp	-0.0847491	1	-0.0754135	1	0.0550021	1	-0.109938	1	-0.0136298	1	0.00573926	1	0.0596057	1	0.208211	1	-0.0683594	1	-0.000335693	4.65399e-08	-0.0324038	1	0.0153148	1	0.109834	1	0.00417192	1	-0.0704584	1	0.320545	1	0.135908	1	0.0822627	1	-0.0544969	1	-0.0505726	1	-0.070642	1	0.0174093	0.813491	FALSE	FALSE	0.0494519	3.56525e-11	FALSE
Ado	0.0318575	1	-0.0708569	1	0.0778195	1	-0.0561906	1	-0.166103	1	-0.0555254	1	0.0126234	1	0.179546	1	-0.169802	1	-0.00357506	1.51498e-06	-0.0393802	1	-0.0495402	1	0.0402933	1	-0.0990344	1	-0.13647	1	0.0615712	1	0.0262513	1	0.34298	1	0.106749	1	-0.173962	1	-0.124603	1	-0.0126358	0.967131	FALSE	FALSE	-0.000528466	3.81818e-40	FALSE
Adpgk	-0.00524499	1	0.0737526	1	0.0385873	1	-0.0899956	1	-0.128949	1	-0.117187	0.043862	-0.00480545	1	-0.0435539	1	-0.0763237	1	-0.0602878	4.38801e-25	-0.0960738	1	-0.146243	1	-0.132363	1	-0.125166	0.00695626	-0.0466751	1	0.00704368	1	-0.120809	1	-0.0710905	1	0.0440674	1	-0.170484	1	-0.155329	1	-0.0679586	1.11348e-10	FALSE	FALSE	-0.0538441	1.80367e-84	FALSE
Adprh	-0.000854163	1	-0.139172	1	-0.0598976	1	0.257692	1	0.0422448	1	-0.0765565	1	0.188078	1	-0.224049	1	0.0705304	1	0.0111702	6.27205e-05	-0.0110723	1	-0.0459234	1	-0.0925772	1	-0.0355673	1	-0.0269421	1	0.0614918	1	0.154639	1	-0.13188	1	0.1006	1	-0.000531147	1	-0.0971049	1	-0.00265151	0.998925	FALSE	FALSE	-0.026574	2.69552e-45	FALSE
Adprhl2	-0.168762	1	-0.116431	1	-0.0348571	1	-0.251104	1	0.0574225	1	-0.112925	0.352611	-0.0479304	1	-0.0243099	1	-0.0162607	1	-0.00147802	8.43969e-08	-0.0817607	1	-0.185633	1	0.090463	1	-0.00586614	1	-0.00864368	1	0.124631	1	-0.0400218	1	-0.0250453	1	0.0127145	1	-0.0867451	1	-0.00975519	1	-0.0443952	0.782001	FALSE	FALSE	-0.0579824	4.73943e-89	FALSE
Adrm1	0.109964	1	-0.0112855	1	-0.141424	1	-0.106531	1	0.149007	1	-0.0636912	1	-0.0731846	1	-0.0287428	1	0.219808	1	0.0228623	1	-0.0302651	1	0.0502038	1	0.136591	1	0.0573677	1	0.11062	1	-0.101743	1	0.173913	1	0.149167	1	-0.0880428	1	0.241637	1	0.224368	1	0.0476475	1	FALSE	FALSE	0.115645	1	FALSE
Adsl	0.0276979	1	-0.000833413	1	-0.132187	1	-0.0857701	1	0.116852	1	0.10962	1	-0.0425099	1	0.0501672	1	-0.0781746	1	0.0502877	1	-0.163899	0.28731	-0.154435	1	0.0916074	1	0.000106695	1	0.0459593	1	-0.139403	1	-0.100076	1	0.0743955	1	0.0220228	1	0.203189	1	0.18024	1	0.00356466	1	FALSE	FALSE	0.0439825	1.19353e-14	FALSE
Adss	-0.164841	1	0.0463291	1	-0.0287343	1	-0.147888	1	-0.112843	1	0.131988	1	0.15234	1	0.0489745	1	0.020829	1	-0.022509	1	0.118483	1	-0.0765401	1	0.279704	1	0.0134478	1	0.0324346	1	0.298449	1	0.015123	1	0.0811783	1	-0.112801	1	-0.00831275	1	0.0108123	1	0.0274107	1	FALSE	FALSE	0.0319284	0.346983	FALSE
Adssl1	0.0315439	1	-0.128738	1	0.205659	1	0.0354854	1	0.377544	1	-0.154534	1	-0.198306	1	-0.282938	1	0.187124	1	-0.054767	2.65909e-13	0.127688	1	0.174301	1	-0.244805	1	0.0922698	1	-0.217056	1	-0.165437	1	-0.0563229	1	0.288891	1	0.00476528	1	-0.0675494	1	-0.0104526	1	-0.00264929	0.0519636	FALSE	FALSE	0.114091	0.823794	FALSE
Aebp1	0.355088	1	0.215261	1	0.116186	1	0.248732	1	0.550353	1	0.445017	1	0.0314645	1	0.575679	1	0.0279212	1	0.0662542	1	0.258889	1	0.0342994	1	0.254236	1	0.529308	1	0.330794	1	0.131531	1	0.0874309	1	0.350857	1	0.372713	1	0.00104422	1	0.154986	1	0.244669	1	FALSE	FALSE	0.469013	1.44071e-120	FALSE
Aebp2	-0.01004	1	0.117362	1	0.0829393	1	-0.397694	0.0744425	0.137651	1	0.00701019	1	-0.0907469	1	-0.177397	1	-0.114351	1	-0.065267	6.10251e-13	-0.024821	1	-0.139436	1	-0.223392	1	-0.0559772	1	0.0213233	1	-0.089441	1	-0.193947	1	0.0162461	1	-0.0537907	1	0.0477963	1	-0.220336	1	-0.0679195	0.0266876	FALSE	FALSE	-0.034109	2.17669e-39	FALSE
Aen	-0.0187962	1	-0.242199	1	-0.0974613	1	-0.0707564	1	-0.0483514	1	-0.0917509	1	-0.264418	0.000524381	-0.208983	1	-0.0554886	1	-0.0275913	1.69436e-12	-0.0656313	1	-0.00666048	1	0.342455	1	-0.0266798	1	0.0475234	1	-0.211348	1	0.286266	1	-0.0835478	1	-0.0415095	1	7.15573e-05	1	-0.0172427	1	-0.0429571	0.00502503	FALSE	FALSE	-0.0766079	9.20935e-88	FALSE
Aes	0.245616	1	-0.0319862	1	0.156947	1	-0.122434	1	-0.0770429	1	-0.193784	1	-0.0119259	1	-0.0962807	1	-0.158021	1	0.0997303	1	0.124165	1	0.343836	1	0.225515	1	0.230928	1	0.160495	1	-0.148551	1	-0.0361197	1	0.0892556	1	-0.117965	1	0.25762	1	-0.0165405	1	0.0439742	1	FALSE	FALSE	0.0742887	1	FALSE
Afap1	-0.19834	1	-0.0320354	1	0.0963935	1	-0.298312	1	0.187009	1	0.378761	1	-0.0675775	1	0.0733541	1	-0.0920937	1	-0.0684081	7.16209e-09	-0.0395906	1	-0.308512	1	-0.0661271	1	-0.264791	1	-0.144942	1	-0.0556074	1	-0.103166	1	0.0439863	1	0.127376	1	-0.208668	1	-0.0689334	1	-0.0528678	0.668281	FALSE	FALSE	-0.0657006	3.27859e-42	FALSE
Afdn	-0.221072	1	-0.0265683	1	0.0482832	1	-0.140568	1	-0.167738	1	0.0470415	1	-0.133899	1	0.0781148	1	-0.0776801	1	-0.0596164	2.15597e-05	0.0423364	1	-0.172079	1	0.0641334	1	0.0480545	1	-0.0611082	1	-0.0945092	1	0.186813	1	-0.0894762	1	0.0697776	1	-0.355463	1	0.0629176	1	-0.0453478	0.996391	FALSE	FALSE	-0.1383	2.4578e-52	FALSE
Aff1	-0.0360576	1	-0.0237808	1	0.0451684	1	0.0963185	1	0.111406	1	0.0280162	1	-0.0452721	1	0.0695442	1	0.0963559	1	-0.0226834	4.71298e-12	0.00450509	1	0.0421276	1	0.0607338	1	0.0625077	1	-0.0720417	1	-0.000452019	1	0.0212897	1	0.0159984	1	0.104504	1	-0.03356	1	-0.0282725	1	0.023636	0.135324	FALSE	FALSE	0.0255973	4.85406e-23	FALSE
Aff4	0.130587	1	0.176806	1	-0.150607	1	0.011772	1	-0.0888958	1	0.327704	1	0.0772649	1	-0.164773	1	-0.0597586	1	-0.0651914	2.75153e-05	0.106443	1	0.0619631	1	0.0193703	1	0.0296694	1	0.0159579	1	0.0181715	1	-0.173207	1	-0.093032	1	0.0451499	1	-0.403738	1	0.166865	1	-0.00054657	0.99721	FALSE	FALSE	0.0708553	1	FALSE
Afg3l1	0.0944861	1	-0.206923	1	0.121619	1	0.0665595	1	0.0666456	1	-0.0350578	1	0.0231467	1	0.0765542	1	0.0130241	1	-0.0429378	4.02505e-15	-0.0632502	1	-0.0429341	1	-0.00951323	1	-0.037815	1	-0.0761867	1	-0.202214	1	0.0129031	1	-0.128683	1	-0.104636	1	-0.289787	1	0.00563621	1	-0.0361601	0.00981562	FALSE	FALSE	-0.061999	4.43924e-79	FALSE
Afg3l2	-0.00529018	1	0.0933506	1	-0.0268853	1	0.0273053	1	-0.0718667	1	0.0512011	1	-0.00475767	1	-0.10157	1	0.0414586	1	-0.0252749	4.94405e-11	-0.117764	1	-0.00906014	1	0.0597205	1	0.131023	1	0.174509	1	0.115664	1	0.170708	1	-0.187373	1	0.00476161	1	-0.0458718	1	0.059505	1	0.0158806	0.259842	FALSE	FALSE	0.0113227	6.80821e-34	FALSE
Afp	-0.0299417	1	-0.37802	1	0.181619	1	0.243351	1	-0.297767	1	0.0114886	1	-0.208976	1	0.319018	1	-0.195214	1	-0.000607352	2.95543e-07	-0.0957798	1	-0.221481	1	0.24264	1	-0.109003	1	-0.00711201	1	0.259103	1	-0.0526626	1	0.291025	1	-0.0314706	1	0.0620667	1	0.10464	1	0.00413886	0.91558	FALSE	FALSE	-0.121992	1.5043e-100	FALSE
Aftph	-0.0146448	1	0.0943543	1	0.0455263	1	-0.0301175	1	-0.0574241	1	0.129269	1	-0.120054	1	-0.0679908	1	0.05687	1	-0.0602212	2.28157e-16	0.0565505	1	-0.106682	1	-0.0594592	1	0.0343459	1	-0.150919	1	-0.103047	1	0.171574	1	-0.0877503	1	0.0304905	1	0.17508	1	-0.0821428	1	-0.00697111	0.00267557	FALSE	FALSE	0.000306763	6.41837e-37	FALSE
Aga	-0.00089849	1	0.039566	1	0.0136447	1	-0.21324	1	-0.0505316	1	-0.064452	1	-0.0826789	1	0.12783	1	-0.143567	1	-0.0160336	2.96101e-07	0.0451162	1	0.0755975	1	-0.0767608	1	-0.0293953	1	-0.038569	1	-0.0101214	1	0.160912	1	0.0709015	1	-0.0119076	1	-0.0375693	1	0.0316862	1	-0.0100224	0.91566	FALSE	FALSE	0.0120671	1.62634e-25	FALSE
Agap1	-0.182267	1	0.270919	1	0.00333173	1	-0.103122	1	0.0421402	1	-0.0260329	1	-0.137772	1	-0.0107299	1	-0.0504891	1	-0.075529	2.67767e-25	-0.117375	1	-0.125437	1	-0.290298	1	-0.122107	0.0374869	0.0483261	1	-0.109938	1	-0.0766513	1	-0.192206	1	-0.105751	1	-0.0993218	1	0.0138378	1	-0.0688796	2.13924e-09	FALSE	FALSE	-0.0643987	3.49482e-85	FALSE
Agap3	-0.0240518	1	-0.136708	1	-0.0997124	1	0.13397	1	0.05092	1	-0.00348878	1	-0.00650646	1	-0.0399593	1	0.0915424	1	-0.039935	4.48044e-15	-0.012308	1	-0.108556	1	0.00581657	1	-0.00706063	1	-0.0684684	1	0.00791296	1	-0.0719459	1	-0.0667016	1	0.0549399	1	-0.0127764	1	-0.149343	1	-0.0239248	0.0102798	FALSE	FALSE	-0.023334	3.32027e-53	FALSE
Agbl3	-0.0488861	1	-0.0448558	1	0.0846676	1	0.119107	1	0.0248085	1	-0.00283521	1	0.0247858	1	0.0598986	1	-0.0405358	1	-0.0613449	3.55393e-17	0.0131123	1	0.0480083	1	0.142504	1	0.0614404	1	0.00322912	1	0.134581	1	-0.078097	1	-0.0207226	1	0.0513418	1	-0.0129487	1	-0.0475617	1	0.0195093	0.0010861	FALSE	FALSE	-0.0152771	1.03228e-41	FALSE
Agfg1	0.0529358	1	-0.352048	1	-0.233413	1	-0.0765253	1	-0.125606	1	-0.0571399	1	0.00678487	1	-0.0926386	1	0.0342723	1	-0.0915495	6.78594e-20	0.107119	1	0.0377042	1	0.101363	1	0.0210993	1	-0.268168	1	0.2732	1	0.0752491	1	0.0660228	1	-0.0601847	1	-0.114707	1	-0.180357	1	-0.0417422	3.89672e-05	FALSE	FALSE	-0.0740942	5.24882e-61	FALSE
Agfg2	-0.0256429	1	-0.0704877	1	-0.0695598	1	0.219955	1	0.0151069	1	-0.00771248	1	-0.0901595	1	0.0157767	1	0.158402	1	-0.0279071	4.53802e-11	0.0107189	1	-0.0260009	1	-0.0414342	1	0.00406862	1	0.0784441	1	0.0564723	1	-0.0451079	1	0.0485085	1	-0.112896	1	-0.184477	1	0.0338304	1	-0.00286197	0.254295	FALSE	FALSE	0.00239578	3.28265e-31	FALSE
Aggf1	0.0803	1	-0.238951	1	-0.089134	1	-0.288124	1	0.0486709	1	0.196871	1	0.0246619	1	-0.0398824	1	-0.05878	1	0.00491465	0.000108917	0.0317338	1	-0.154926	1	-0.0493029	1	-0.0550391	1	-0.241047	1	-0.0216968	1	0.134726	1	0.0757705	1	-0.0534398	1	-0.117192	1	0.166666	1	-0.0306286	0.999478	FALSE	FALSE	0.0161618	1.80377e-21	FALSE
Agk	-0.0358479	1	-0.0211817	1	-0.0996405	1	-0.015264	1	0.00728272	1	-0.050479	1	-0.0498522	1	0.0180515	1	-0.070807	1	-0.0348772	7.01597e-17	0.0588219	1	0.037982	1	0.157712	1	-0.0101396	1	-0.0768508	1	-0.126583	1	-0.0211021	1	0.304672	1	-0.0423286	1	-0.00633501	1	-0.100537	1	-0.00844298	0.00151811	FALSE	FALSE	-0.0195919	2.54483e-51	FALSE
Agl	-0.107417	1	0.131145	1	0.0350271	1	-0.253821	1	0.087234	1	0.156979	1	-0.0614071	1	-0.115878	1	0.0511534	1	-0.00102112	4.26654e-11	-0.0205446	1	-0.186103	1	-0.0395364	1	0.0974999	1	0.139615	1	-0.00998598	1	0.115551	1	-0.0968129	1	0.0338294	1	-0.408071	1	-0.0848386	1	-0.0255906	0.250349	FALSE	FALSE	-0.0218905	3.75723e-54	FALSE
Ago1	0.104168	1	0.112561	1	0.157155	1	0.0194465	1	-0.070554	1	0.0483605	1	-0.0760271	1	-0.0992867	1	-0.0311841	1	-0.0258997	3.14406e-13	0.0224928	1	-0.0988781	1	-0.107541	1	0.0521593	1	-0.125156	1	-0.224317	1	0.0570441	1	-0.134102	1	0.0176342	1	0.0236911	1	-0.00730737	1	-0.018359	0.0551892	FALSE	FALSE	-0.03264	2.31047e-66	FALSE
Ago2	-0.121365	1	-0.0715321	1	-0.14632	1	0.0111495	1	-0.136339	1	0.152465	1	0.0609207	1	0.331599	1	0.00475895	1	-0.0127255	1.73251e-05	0.200452	1	0.0278857	1	0.00719119	1	0.0470828	1	0.12029	1	0.371401	1	0.0138852	1	-0.0159217	1	0.0645507	1	0.143548	1	-0.144898	1	0.0432418	0.995496	FALSE	FALSE	0.0489495	4.46031e-10	FALSE
Agpat1	-0.0376518	1	0.0723811	1	0.02864	1	-0.101107	1	0.0652118	1	-0.106308	0.419264	0.0402934	1	0.0815764	1	-0.0721795	1	-0.0248478	1.03554e-14	-0.0281668	1	-0.00434559	1	0.0349605	1	0.0208495	1	0.0262367	1	0.0382449	1	0.362514	1	-0.081436	1	-0.127876	1	-0.118021	1	0.00393071	1	0.0034714	0.0101415	FALSE	FALSE	-0.08119	5.78965e-106	FALSE
Agpat2	0.230796	1	-0.0614193	1	0.146255	1	-0.106062	1	0.155124	1	0.0922056	1	0.0261613	1	0.0733488	1	-0.0771321	1	0.0753748	1	0.0834819	1	0.0625731	1	0.113969	1	0.0368851	1	0.164846	1	0.124011	1	0.198846	1	0.0566296	1	0.0983547	1	0.143948	1	0.0948576	1	0.0825264	1	FALSE	FALSE	0.138538	1	FALSE
Agpat3	0.0774541	1	-0.194061	1	0.123277	1	-0.0328609	1	-0.173348	1	0.059928	1	-0.0554714	1	0.00914831	1	0.0918451	1	0.023939	0.000983107	0.0735583	1	-0.0716194	1	0.0012466	1	0.0702505	1	0.077073	1	0.050667	1	-0.102147	1	-0.153818	1	0.0666408	1	0.159822	1	0.0581832	1	0.00760515	0.999988	FALSE	FALSE	-6.50462e-05	9.27088e-36	FALSE
Agpat4	0.00849438	1	0.211557	1	0.143062	1	-0.0637819	1	0.0916435	1	0.00205243	1	0.249765	1	0.0078129	1	-0.000385437	1	0.0850204	1	0.0801616	1	-0.125037	1	0.134157	1	0.030208	1	0.0923094	1	-0.0146261	1	0.0171453	1	-0.0360531	1	0.246239	1	-0.0832326	1	0.0210569	1	0.0522652	1	FALSE	FALSE	-0.0153731	8.98919e-42	FALSE
Agpat5	0.0356551	1	-0.383757	1	-0.100588	1	-0.291811	1	-0.112963	1	-0.0463089	1	0.06143	1	0.240283	1	-0.166495	1	0.0360231	1	-0.0910931	1	0.0409307	1	-0.0139837	1	0.0317139	1	-0.312839	1	-0.0974636	1	0.0457211	1	0.101064	1	-0.0269124	1	0.0381711	1	-0.0451375	1	-0.0503981	1	FALSE	FALSE	-0.0183826	3.42888e-23	FALSE
Agps	0.0575538	1	0.037988	1	-0.187207	1	-0.0564045	1	0.329046	1	0.0259363	1	-0.0703207	1	-0.0197136	1	0.133409	1	-0.0508523	8.28739e-16	0.0198807	1	-0.121666	1	-0.00123003	1	-0.0992543	1	0.0365474	1	0.0525283	1	-0.117735	1	0.00208665	1	0.00753769	1	0.125338	1	0.164138	1	0.0127431	0.00486846	FALSE	FALSE	0.000738436	4.91175e-34	FALSE
Agrn	-0.119855	1	-0.0625685	1	0.0643572	1	-0.283196	1	0.343396	1	0.143664	1	0.0764937	1	-0.231642	1	-0.190116	1	-0.00820182	2.61168e-12	0.0176264	1	-0.150992	1	0.0841358	1	0.00380406	1	0.0548604	1	0.0462434	1	-0.0324279	1	-0.00404307	1	0.0486646	1	-0.144731	1	0.0510136	1	-0.0139769	0.112709	FALSE	FALSE	-0.0897704	1.75245e-105	FALSE
Agtpbp1	-0.00439418	1	-0.0850953	1	-0.0129311	1	0.126924	1	0.239585	1	0.0105767	1	0.0659574	1	0.125243	1	-0.10552	1	-0.010975	3.26294e-07	-0.0024184	1	0.0842744	1	-0.0249964	1	0.0536665	1	0.0839389	1	-0.00890967	1	-0.0830603	1	0.00228074	1	-0.143725	1	-0.0994933	1	0.0624304	1	0.0130171	0.919698	FALSE	FALSE	0.0273876	2.53494e-14	FALSE
Agtrap	0.141223	1	0.0438816	1	-0.00413282	1	0.272175	1	-0.144722	1	0.0108528	1	-0.0577095	1	0.122118	1	0.0107993	1	0.0394028	1	-0.0205273	1	-0.0343342	1	-0.0591192	1	-0.00849894	1	0.0670556	1	-0.121166	1	-0.0387509	1	-0.111007	1	-0.0547957	1	0.0771419	1	0.119071	1	0.0118551	1	FALSE	FALSE	0.0043776	2.84609e-31	FALSE
Ahctf1	-0.0869279	1	-0.210007	1	0.0231875	1	-0.101914	1	-0.226473	1	0.0317965	1	-0.162116	1	0.0878247	1	-0.0209242	1	-0.0419005	4.54299e-09	-0.0746441	1	-0.0274024	1	-0.064699	1	-0.065838	1	0.0594197	1	-0.135387	1	0.0673577	1	-0.344019	1	0.150601	1	0.168679	1	-0.00775392	1	-0.0467209	0.62893	FALSE	FALSE	-0.0510247	1.63017e-44	FALSE
Ahcyl1	-0.0714348	1	0.087534	1	-0.0501514	1	-0.0929814	1	-0.322302	1	0.113487	1	-0.0717017	1	-0.234372	1	-0.00629251	1	-0.0171873	0.00616749	0.0313598	1	0.0888909	1	0.204137	1	0.0115423	1	0.00730026	1	0.0859835	1	-0.0277236	1	-0.141252	1	0.11096	1	0.138268	1	0.0767886	1	-0.00376896	1	FALSE	FALSE	0.0644195	0.00118249	FALSE
Ahcyl2	-0.0378727	1	-0.0774828	1	-0.0865994	1	0.013154	1	-0.037211	1	-0.0619183	1	-0.0394423	1	-0.0761624	1	-0.0557689	1	-0.0267863	7.19781e-15	-0.0393943	1	-0.0429941	1	0.0237604	1	-0.0542379	1	-0.00328516	1	-0.0214558	1	-0.115622	1	0.0530745	1	0.0254271	1	0.117494	1	0.0274527	1	-0.0245653	0.012584	FALSE	FALSE	-0.0494318	4.95736e-83	FALSE
Ahi1	-0.068977	1	0.121455	1	-0.108559	1	0.110339	1	-0.0280394	1	-0.116472	1	0.0142901	1	0.259859	1	0.0131291	1	-0.0232655	7.30345e-10	-0.050632	1	0.0725933	1	0.0514134	1	0.100221	1	0.0521784	1	0.0765376	1	0.115258	1	-0.013937	1	-0.0171404	1	-0.146352	1	-0.019871	1	0.0187633	0.467725	FALSE	FALSE	-0.130495	6.2423e-138	FALSE
Ahnak	0.0921376	1	0.240145	1	0.406368	1	0.248814	1	0.29829	1	0.543087	2.1662e-05	0.224485	1	0.437098	1	0.352805	1	0.191608	0.000261939	0.29004	1	0.216671	1	0.358967	1	0.528479	0.160236	0.152532	1	0.0891991	1	0.443252	1	0.215582	1	0.297083	1	-0.0569957	1	0.291713	1	0.279112	0.48678	FALSE	FALSE	0.355017	3.69816e-86	FALSE
Ahnak2	0.293259	1	0.15638	1	0.133167	1	0.160791	1	0.327762	1	0.188492	1	0.156196	1	-0.118672	1	0.188525	1	0.113837	1	0.426721	1	0.204412	1	0.147416	1	0.158843	1	0.0409399	1	0.375331	1	0.462931	1	0.208375	1	0.231581	1	0.431805	1	0.226107	1	0.214962	1	FALSE	FALSE	0.277237	7.44245e-13	FALSE
Ahr	-0.202965	1	-0.22962	1	-0.252952	1	0.0285347	1	0.14059	1	-0.0100223	1	-0.0388433	1	-0.0576545	1	0.0263757	1	-0.0870819	2.17906e-12	-0.0375588	1	-0.0479579	1	0.0876906	1	0.096557	1	-0.0131555	1	0.0518724	1	-0.0687915	1	-0.0990647	1	0.136459	1	-0.0469046	1	0.0152667	1	-0.0290108	0.106405	FALSE	FALSE	0.00227513	7.66825e-31	FALSE
Ahsa1	-0.0736967	1	-0.538613	1	-0.158872	1	-0.190512	1	0.0803559	1	-0.096331	1	-0.228228	1	-0.575005	1	-0.0173245	1	-0.0568568	4.85996e-06	-0.169088	1	-0.0668641	1	-0.0558508	1	-0.121299	1	-0.0948776	1	0.129106	1	-0.100388	1	0.0023176	1	-0.184328	1	-0.0186265	1	-0.0103554	1	-0.121207	0.985948	FALSE	FALSE	-0.102789	1.38166e-49	FALSE
Ahsa2	-0.121871	1	-0.115461	1	-0.347311	1	-0.000652897	1	0.261479	1	-0.151618	0.229606	-0.28212	0.000612997	-0.222221	1	-0.00398841	1	-0.0807003	2.49387e-14	-0.0863929	1	-0.0192977	1	-0.0457318	1	-0.108821	1	-0.292211	0.471328	-0.0577264	1	-0.136949	1	0.104268	1	-0.132554	1	-0.157379	1	-0.218345	1	-0.105505	0.000224165	FALSE	FALSE	-0.12584	1.55234e-92	FALSE
AI314180	-0.00951594	1	0.382425	1	0.191776	1	-0.154713	1	0.108232	1	0.284216	1	0.104923	1	-0.101008	1	0.0422401	1	-0.0481162	5.45843e-13	-0.119985	1	-0.21673	1	-0.026984	1	0.0571682	1	0.0722471	1	0.3272	1	0.216706	1	-0.170178	1	0.277236	1	0.199774	1	-0.156612	1	0.0600144	0.0670416	FALSE	FALSE	-0.102027	2.02169e-84	FALSE
AI413582	0.103215	1	-0.115599	1	0.272301	1	0.219044	1	-0.117873	1	0.0842508	1	0.0488661	1	0.269496	1	0.108636	1	0.0662677	1	0.0730229	1	0.11626	1	0.119764	1	0.0308288	1	0.0348435	1	-0.396618	1	0.0591797	1	0.0385119	1	-0.00488246	1	-0.174357	1	-0.0307225	1	0.0383065	1	FALSE	FALSE	-0.0390761	8.76608e-41	FALSE
AI467606	-0.0673719	1	0.11571	1	-0.0826242	1	0.0556142	1	-0.0572808	1	0.0160421	1	-0.0647178	1	-0.0321722	1	0.00720846	1	-0.00237839	0.00057568	0.0554189	1	-0.0207376	1	0.0703382	1	-0.128755	1	-0.0119492	1	-0.122863	1	0.00115403	1	-0.0450398	1	0.0111324	1	-0.0558879	1	0.0764485	1	-0.0134624	0.999964	FALSE	FALSE	0.0124424	1.75814e-21	FALSE
AI597479	0.0247299	1	0.0173467	1	0.0529302	1	0.00662443	1	0.102068	1	0.0592851	1	0.0192549	1	-0.0325289	1	-0.00332104	1	0.00566121	3.88607e-05	0.0269988	1	-0.033306	1	0.0882377	1	0.0391683	1	-0.00281966	1	-0.134745	1	0.082294	1	0.0939321	1	0.0715118	1	-0.106672	1	-0.00771103	1	0.0175685	0.998098	FALSE	FALSE	0.0110707	1.92291e-25	FALSE
AI837181	0.1146	1	0.0738072	1	-0.0818872	1	0.110429	1	0.128844	1	0.0178615	1	0.0400142	1	-0.0168224	1	0.0638967	1	0.0366912	7.00851e-05	0.0901112	1	0.176729	1	0.121516	1	0.0269195	1	0.0762147	1	-0.213479	1	-0.0109778	1	0.112258	1	-0.0745423	1	0.0393671	1	0.136178	1	0.0460823	0.999065	FALSE	FALSE	0.0544287	2.14626e-18	FALSE
Aida	-0.0217592	1	0.00783754	1	0.0190808	1	0.0763327	1	0.0665083	1	0.213646	1	-0.0207613	1	0.176961	1	0.169576	1	-0.00462874	2.07078e-05	0.154595	1	-0.188492	1	-0.0545368	1	0.160127	1	0.00527875	1	0.163325	1	0.0945816	1	0.387595	1	0.165299	1	0.21303	1	0.146843	1	0.0919256	0.996238	FALSE	FALSE	0.0974331	0.00608418	FALSE
Aifm1	0.201025	1	-0.0687713	1	-0.0252271	1	-0.1155	1	0.221138	1	0.10258	1	-0.102154	1	-0.0549166	1	0.202768	1	0.0505432	1	0.0536277	1	0.0388888	1	0.0384436	1	0.155947	1	-0.371864	1	0.201611	1	0.0554459	1	0.0611339	1	-0.286374	1	0.0528504	1	-0.0156424	1	0.0188358	1	FALSE	FALSE	0.0634059	1	FALSE
Aig1	0.249084	1	0.192616	1	-0.0806465	1	0.18957	1	0.228519	1	-0.0947459	1	0.00918423	1	0.0887924	1	0.0523008	1	-0.0182069	1	0.13797	1	0.0506798	1	0.0511824	1	0.246186	1	0.00495765	1	0.137045	1	0.057405	1	-0.0259186	1	-0.0592045	1	0.0876362	1	-0.0162532	1	0.0708645	1	FALSE	FALSE	-0.0971499	6.61979e-26	FALSE
Aim2	-0.104851	1	-0.123795	1	0.0565749	1	0.0602293	1	0.145046	1	-0.0499255	1	-0.0544087	1	0.102633	1	0.0736523	1	-0.0390851	3.70615e-15	-0.010959	1	0.0726837	1	-0.177788	1	-0.126241	0.909018	-0.02748	1	-0.182539	1	-0.0466429	1	0.0135461	1	-0.219954	1	-0.0633621	1	0.0529885	1	-0.030937	0.0090873	FALSE	FALSE	-0.0129469	1.24999e-47	FALSE
Aimp1	0.0616644	1	0.0993899	1	0.287333	1	0.481472	1	0.203454	1	0.0644961	1	0.024474	1	0.00827295	1	0.0718022	1	0.117829	0.200459	-0.0846302	1	0.0614502	1	0.324424	1	0.0723447	1	-0.0537841	1	0.151808	1	-0.0890333	1	0.0762526	1	0.0219851	1	0.120126	1	0.117838	1	0.101856	1	FALSE	FALSE	0.0447637	1	FALSE
Aimp2	0.0989354	1	-0.119392	1	0.089947	1	-0.290465	1	-0.189509	1	-0.065025	1	0.0860398	1	-0.384686	1	-0.0571777	1	0.104954	1	0.122722	1	-0.134857	1	-0.0730358	1	0.0866783	1	-0.121303	1	-0.0588643	1	0.277856	1	0.0824365	1	-0.309282	1	-0.0820029	1	-0.171355	1	-0.0527326	1	FALSE	FALSE	0.0281335	3.06924e-11	FALSE
Aip	0.0651877	1	-0.0620646	1	0.129772	1	0.218262	1	-0.380567	0.575868	0.0116186	1	0.0949475	1	0.197712	1	0.140554	1	0.0624599	1	-0.022855	1	-0.223578	1	-0.0227352	1	-0.0187256	1	0.102222	1	0.0464669	1	-0.0135194	1	0.291697	1	-0.0693901	1	0.0463748	1	0.149204	1	0.0353831	1	FALSE	FALSE	0.0585449	8.15653e-10	FALSE
Ak2	-0.0744109	1	-0.173636	1	0.141306	1	-0.03893	1	0.0923066	1	0.0240819	1	0.0502563	1	0.0933904	1	-0.201385	1	0.148589	1	-0.0617596	1	0.00936342	1	0.0497478	1	0.107856	1	0.240563	1	0.592953	1	0.118786	1	0.243203	1	0.000596639	1	0.109137	1	0.071872	1	0.0735184	1	FALSE	FALSE	-0.0495535	4.35889e-10	FALSE
Ak4	0.0425164	1	0.0610262	1	0.0540905	1	-0.00217176	1	-0.160977	1	0.0237843	1	0.0941794	1	-0.058224	1	-0.194076	1	-0.0404287	6.63779e-13	-0.0735135	1	-0.109991	1	-0.153459	1	-0.048234	1	0.00127714	1	-0.211661	1	-0.00785422	1	-0.284424	1	-0.0874694	1	-0.104769	1	-0.0645845	1	-0.0630935	0.071729	FALSE	FALSE	-0.100684	1.97074e-112	FALSE
Ak6	-0.140806	1	0.0378188	1	0.171576	1	-0.324076	1	-0.163226	1	-0.0279119	1	-0.0663615	1	-0.519045	1	-0.188164	1	0.0426681	1	-0.0935868	1	-0.164777	1	0.21315	1	-0.066846	1	-0.317378	0.619769	0.220126	1	0.117091	1	-0.218539	1	-0.151684	1	-0.108054	1	-0.0811369	1	-0.0871029	1	FALSE	FALSE	0.0174784	1.67171e-05	FALSE
Akap1	-0.00226175	1	0.0668197	1	-0.0542353	1	0.0996045	1	0.156626	1	-0.0151533	1	-0.042667	1	0.104036	1	0.0422491	1	7.72446e-05	5.81285e-07	0.00159237	1	-0.152988	1	-0.014228	1	0.0153984	1	0.0751633	1	0.13496	1	0.150753	1	-0.0164077	1	0.0355156	1	-0.067568	1	0.0932256	1	0.029072	0.941051	FALSE	FALSE	-0.000256947	2.61684e-37	FALSE
Akap11	-0.052409	1	-0.156514	1	-0.131565	1	-0.0806608	1	-0.191334	1	-0.000900787	1	-0.101254	1	0.00418694	1	0.14805	1	-0.00487668	2.41105e-06	0.0651225	1	-0.00486617	1	0.00553368	1	0.0595651	1	-0.0793691	1	0.187789	1	0.0639214	1	0.0599883	1	0.00150388	1	0.137298	1	0.0237328	1	-0.0022408	0.976108	FALSE	FALSE	-0.00938089	3.55621e-41	FALSE
Akap13	0.146815	1	-0.0427626	1	-0.0496881	1	0.235052	1	-0.057729	1	0.0224922	1	0.173492	1	-0.186982	1	0.309682	1	-0.00464611	9.37152e-08	0.0122028	1	-0.0324233	1	0.00415808	1	0.127383	1	-0.0416249	1	-0.0126936	1	0.161267	1	0.161048	1	-0.00533154	1	0.0473197	1	-0.0795605	1	0.0422606	0.857701	FALSE	FALSE	-0.00765241	4.97092e-36	FALSE
Akap8	-0.071747	1	0.43426	1	-0.12265	1	0.0352936	1	0.428721	1	0.19138	1	0.0202826	1	-0.0218357	1	0.094736	1	0.0381898	1	0.112033	1	-0.156846	1	0.199094	1	0.138655	1	-0.0398807	1	0.00527889	1	0.140105	1	0.0195935	1	-0.0130445	1	-0.0522551	1	0.271074	1	0.0785922	1	FALSE	FALSE	0.0222149	5.72681e-20	FALSE
Akap8l	0.0980884	1	-0.127951	1	0.0213934	1	0.370679	1	0.174742	1	0.0872569	1	0.0233348	1	0.0291847	1	0.11754	1	-0.00016231	5.53733e-06	0.164205	1	0.0317411	1	0.103137	1	0.0690733	1	0.0978769	1	0.043321	1	0.0246357	1	-0.119156	1	0.0998996	1	-0.127529	1	0.0783297	1	0.0599829	0.98736	FALSE	FALSE	0.0255634	2.43192e-27	FALSE
Akap9	0.17961	1	0.177706	1	-0.169951	1	-0.224064	1	-0.119337	1	0.138696	1	-0.145768	1	0.0870147	1	0.044831	1	-0.163366	9.87276e-16	0.146428	1	0.0326531	1	-0.212051	1	-0.132199	1	-0.0583866	1	0.414793	1	0.137105	1	-0.124824	1	-0.124239	1	-0.364749	1	0.0279039	1	-0.021533	0.00527106	FALSE	FALSE	-0.04817	1.81637e-18	FALSE
Akirin1	-0.12467	1	-0.123998	1	-0.0839181	1	-0.222528	1	0.086067	1	-0.122241	1	-0.00919558	1	-0.0222255	1	0.0415057	1	-0.0296659	7.62505e-14	-0.152328	0.0874404	-0.121313	1	-0.0451484	1	-0.0430998	1	-0.025841	1	0.144292	1	0.0207861	1	-0.0895126	1	-0.175864	1	0.00615923	1	-0.109408	1	-0.0572451	0.0121826	FALSE	FALSE	-0.129484	1.02112e-140	FALSE
Akirin2	-0.0645367	1	-0.196718	1	-0.378459	1	-0.0131888	1	0.121554	1	0.0185545	1	0.11833	1	0.228453	1	0.0295967	1	-0.00112575	0.0182843	-0.0846437	1	0.0969229	1	0.169602	1	-0.144583	1	-0.00163902	1	-0.254194	1	-0.127542	1	-0.133572	1	0.0155905	1	-0.463441	1	-0.192524	1	-0.059884	1	FALSE	FALSE	-0.13861	4.03765e-70	FALSE
Akr1a1	-0.0324517	1	0.167562	1	0.25667	1	0.256017	1	0.297783	1	0.0661009	1	0.100141	1	0.497584	1	0.191159	1	0.119245	1	0.0951675	1	-0.0734425	1	0.107933	1	0.147	1	0.0172594	1	0.118304	1	0.197045	1	0.104523	1	-0.0210831	1	0.148191	1	0.181489	1	0.140105	1	FALSE	FALSE	-0.0644077	4.0988e-14	FALSE
Akr1b10	0.00893524	1	-0.0110458	1	0.0584781	1	0.1633	1	-0.0642434	1	0.0106726	1	-0.0202534	1	-0.0634778	1	0.182144	1	-0.0101701	7.09282e-09	0.0240194	1	0.00974838	1	-0.184733	1	0.119161	1	0.364896	1	-0.0266487	1	-0.0528206	1	-0.12232	1	0.0812343	1	0.0368176	1	0.0491078	1	0.0263239	0.667452	FALSE	FALSE	0.03036	6.31425e-19	FALSE
Akr1b8	0.0801947	1	0.0221601	1	-0.545084	1	0.150903	1	-0.317434	1	-0.0361896	1	0.259911	1	0.105652	1	0.0389785	1	0.0803395	1	0.162248	1	0.253467	1	-0.331184	1	0.110267	1	-0.0713778	1	-0.160088	1	-0.0426956	1	0.175389	1	0.0139319	1	-0.150878	1	-0.107485	1	-0.0147131	1	FALSE	FALSE	0.120618	1	FALSE
Akr1c18	0.551149	1	0.949978	1	-1.07093	1	0.253467	1	-0.113954	1	0.181679	1	-0.0514061	1	1.51105	1	-0.072226	1	-0.0874002	1	0.28522	1	0.283403	1	0.00450083	1	0.352272	1	0.135959	1	-0.410487	1	-0.413335	1	0.552519	1	0.437738	1	0.598122	1	0.64119	1	0.215167	1	FALSE	FALSE	0.307374	1.03106e-05	FALSE
Akr1e1	-0.010425	1	0.13297	1	-0.0573062	1	-0.00863877	1	0.0954746	1	-0.0211055	1	-0.0716775	1	-0.175604	1	0.0489567	1	0.0161212	0.00044909	0.0341638	1	-0.0237881	1	-0.0256615	1	0.0142032	1	0.0578677	1	-0.183012	1	0.00417979	1	-0.039053	1	-0.00803776	1	-0.0521175	1	-0.0204167	1	-0.0139479	0.999943	FALSE	FALSE	0.0384317	3.95985e-16	FALSE
Akr7a5	0.212838	1	0.0966289	1	0.124536	1	0.0668398	1	0.00652764	1	0.106158	1	-0.0752438	1	-0.00642585	1	-0.131039	1	0.0434657	0.19875	0.040413	1	0.0414309	1	-0.154222	1	0.0590898	1	-0.0259391	1	0.317995	1	0.166013	1	-0.0105617	1	0.0125221	1	0.0994284	1	-0.0022954	1	0.0470551	1	FALSE	FALSE	0.0153049	8.5585e-28	FALSE
Akt1s1	-0.069527	1	-0.0287661	1	-0.108678	1	0.25154	1	0.147752	1	-0.012146	1	-0.123769	1	-0.135662	1	0.0245043	1	-0.00459616	1.71984e-06	-0.0768182	1	0.200312	1	0.118976	1	0.100013	1	0.219274	1	0.302758	1	0.0750539	1	-0.0767773	1	-0.00368509	1	0.0293428	1	0.152601	1	0.0467477	0.969798	FALSE	FALSE	0.00680715	1.69593e-29	FALSE
Akt2	0.011799	1	-0.0505308	1	-0.154281	1	-0.0145619	1	-0.180147	1	-0.0316911	1	0.00951357	1	0.077768	1	0.131036	1	0.0132118	2.99094e-05	0.0368678	1	0.232394	1	-0.125136	1	-0.0249351	1	-0.000577386	1	0.128522	1	0.0914846	1	-0.063156	1	-0.0168973	1	-0.0817073	1	0.0762458	1	0.00310576	0.997451	FALSE	FALSE	0.0135931	1.46939e-36	FALSE
Akt3	0.0545943	1	0.00875345	1	-0.142741	1	-0.129179	1	-0.138542	1	-0.0260409	1	0.0480904	1	-0.250619	1	0.0133397	1	-0.0395546	1.12745e-15	-0.00562364	1	-0.100551	1	-0.0246787	1	-0.0176326	1	-0.0262977	1	0.0278113	1	-0.0394212	1	-0.184805	1	0.0282542	1	-0.057362	1	0.0530396	1	-0.0451983	0.00559684	FALSE	FALSE	-0.0523414	3.68014e-80	FALSE
Aktip	-0.017379	1	-0.244463	1	-0.028403	1	0.0160261	1	-0.160201	1	0.0314845	1	-0.0506592	1	-0.0441806	1	-0.0585481	1	-0.0333149	5.15196e-16	-0.00833709	1	-0.0998421	1	0.0441283	1	0.0143541	1	-0.0345072	1	-0.0837726	1	0.0245232	1	-0.122377	1	-0.0183355	1	-0.0620411	1	-0.0971161	1	-0.0491886	0.00391507	FALSE	FALSE	-0.074849	7.129e-105	FALSE
Alad	0.00156116	1	-0.0875686	1	-0.0051878	1	0.0983165	1	0.242112	1	0.222852	1	-0.209517	1	0.105466	1	-0.0628214	1	0.0381364	1	0.0272275	1	-0.241737	1	0.159092	1	0.107809	1	0.0860271	1	0.122295	1	0.209896	1	0.242371	1	-0.216403	1	0.168291	1	-0.0839213	1	0.0440142	1	FALSE	FALSE	-0.0908151	7.14776e-44	FALSE
Alas1	-0.0121874	1	-0.0957869	1	-0.170446	1	0.00560671	1	0.0628363	1	-0.049518	1	0.00417196	1	0.0407239	1	-0.00393394	1	0.0661914	1	0.0273002	1	0.0171512	1	0.0190433	1	-0.000915416	1	0.144091	1	-0.122874	1	0.0519009	1	-0.0465296	1	-0.0136599	1	-0.0861627	1	-0.0359282	1	-0.00947262	1	FALSE	FALSE	0.0738199	1.85257e-06	FALSE
Aldh16a1	0.0199417	1	-0.0390424	1	-0.102061	1	-0.0625211	1	0.10893	1	0.0217438	1	0.0389778	1	-0.0555927	1	-0.000343566	1	0.00776	0.00568634	-0.031329	1	-0.080703	1	-0.0973758	1	0.0308648	1	0.146464	1	-0.0173378	1	-0.138627	1	-0.0398549	1	0.0306788	1	-0.026059	1	0.0852952	1	-0.00953291	1	FALSE	FALSE	0.0116172	1.8988e-20	FALSE
Aldh18a1	-0.0890261	1	-0.0499713	1	-0.124507	1	0.21782	1	0.0229026	1	-0.0462144	1	0.00217298	1	-0.135244	1	-0.105537	1	-0.0396737	2.17665e-19	-0.0979311	0.872925	-0.15684	1	-0.0600495	1	-0.0114749	1	-0.0883637	1	0.158496	1	-0.037576	1	-0.0932959	1	-0.102164	1	-0.136583	1	0.104259	1	-0.0413715	6.92547e-05	FALSE	FALSE	-0.0683187	5.84248e-109	FALSE
Aldh2	0.230913	1	-0.0475959	1	-0.0705067	1	0.0752939	1	-0.263229	1	-0.117891	1	-0.253684	1	0.0303582	1	-0.00361855	1	-0.045535	1	-0.00288685	1	-0.0393816	1	0.176547	1	0.0331209	1	-0.15166	1	0.208419	1	0.13617	1	-0.140303	1	-0.0357045	1	-0.262283	1	-0.0705053	1	-0.0292362	1	FALSE	FALSE	0.137876	7.34209e-08	FALSE
Aldh3a2	-0.100027	1	-0.0407148	1	0.0724393	1	0.157581	1	0.155165	1	0.0254987	1	0.0265066	1	-0.120137	1	-0.0225525	1	-0.00128543	5.24944e-06	0.0256362	1	0.0188146	1	0.0662058	1	0.00305564	1	-0.00357878	1	0.0312949	1	-0.00590511	1	-0.0797614	1	0.0367521	1	-0.0232356	1	-0.049622	1	0.00819673	0.986797	FALSE	FALSE	0.0103042	1.79323e-22	FALSE
Aldh5a1	-0.152753	1	-0.0279717	1	0.0393778	1	-0.0479646	1	-0.0432035	1	-0.0446582	1	-0.13949	0.0081354	0.149804	1	0.0327548	1	0.00894129	1.03171e-06	0.00158592	1	0.0684855	1	-0.153461	1	0.0280222	1	-0.0550094	1	0.0736991	1	-0.134258	1	0.0730999	1	-0.00759486	1	-0.116401	1	-0.0819624	1	-0.0251884	0.681741	FALSE	FALSE	0.00584013	1.1858e-36	FALSE
Aldh7a1	0.207245	1	0.0206154	1	-0.0426582	1	0.176074	1	-0.131324	1	-0.00977901	1	0.0419643	1	-0.180088	1	0.0694383	1	-0.0253966	2.11194e-11	-0.00696391	1	-0.0709976	1	-0.0513518	1	0.0992542	1	-0.169742	1	-0.218435	1	-0.138153	1	-0.0143774	1	0.123112	1	0.126601	1	0.203628	1	0.000412626	0.208171	FALSE	FALSE	0.0426162	3.51879e-20	FALSE
Aldh9a1	-0.0629477	1	-0.182113	1	-0.195317	1	-0.0197075	1	-0.00952432	1	0.0551353	1	-0.157327	1	0.0608005	1	0.0422565	1	0.0207034	4.30293e-05	0.0578149	1	-0.125361	1	0.0407895	1	-0.00877234	1	0.166361	1	0.23914	1	0.00103802	1	-0.123193	1	0.0144438	1	-0.219914	1	-0.0690242	1	-0.0226057	0.998309	FALSE	FALSE	-0.00377938	2.3756e-41	FALSE
Aldoa	0.33726	1	-0.013852	1	-0.101412	1	0.242943	1	-0.148131	1	-0.109673	1	0.143545	1	-0.23344	1	0.141777	1	0.122656	1	-0.0572221	1	0.128081	1	0.113865	1	-0.0210453	1	-0.261561	1	-0.578884	1	-0.0696196	1	-0.270773	1	0.500488	1	0.0611349	1	0.100467	1	0.00126686	1	FALSE	FALSE	0.00234088	1	FALSE
Alg10b	-0.224917	1	-0.117444	1	-0.0249415	1	-0.242876	1	0.0321758	1	-0.0831326	0.0994214	-0.0229072	1	0.00385533	1	-0.111407	1	-0.0505558	1.59905e-19	0.00518383	1	-0.0987777	1	0.035904	1	0.00266898	1	-0.0209507	1	-0.0331191	1	-0.0746391	1	-0.036473	1	-0.0753019	1	-0.117903	1	-0.145599	1	-0.0667217	1.70385e-05	FALSE	FALSE	-0.0390951	4.35031e-69	FALSE
Alg13	0.0203151	1	-0.149102	1	-0.192596	1	-0.188836	1	-0.139077	1	0.0352326	1	-0.00925584	1	-0.0764858	1	-0.0115008	1	0.00525025	3.28369e-08	-0.0379713	1	-0.0167951	1	0.0750126	1	0.130494	1	-0.0468555	1	0.10935	1	0.0777758	1	0.0121527	1	-0.0352546	1	-0.109895	1	-0.0138246	1	-0.0267556	0.789133	FALSE	FALSE	-0.000684348	1.24682e-43	FALSE
Alg14	-0.00235354	1	-0.100202	1	0.00357996	1	-0.114022	1	0.456916	1	-0.133593	0.245528	0.0771449	1	-0.334023	1	0.0164074	1	-0.0658289	8.30933e-25	-0.0364939	1	-0.206021	1	0.0678975	1	-0.085238	1	-0.0966047	1	-0.174949	1	0.0319425	1	-0.0495037	1	0.0392745	1	-0.201474	1	0.120325	1	-0.0374675	1.58779e-08	FALSE	FALSE	-0.0644203	4.78366e-91	FALSE
Alg3	-0.0635517	1	-0.0580237	1	-0.173764	1	0.0495952	1	-0.00442473	1	-0.0217612	1	0.115281	1	-0.069188	1	0.0493276	1	-0.0262311	1.00362e-14	-0.0679289	1	-0.039213	1	0.0420906	1	-0.102044	0.00660688	0.0393459	1	-0.0122263	1	0.0392261	1	0.306972	1	-0.148736	1	0.0470069	1	0.113846	1	0.000742814	0.00147681	FALSE	FALSE	-0.014154	4.79201e-46	FALSE
Alg5	0.138782	1	0.0821323	1	0.139122	1	0.0613957	1	0.273263	1	0.161558	1	-0.079404	1	-0.0090145	1	0.107154	1	0.0158963	1	0.124653	1	0.127287	1	0.349436	1	-0.0275439	1	0.351221	1	0.415531	1	0.103804	1	0.173433	1	-0.0776153	1	0.278999	1	0.0163614	1	0.129831	1	FALSE	FALSE	0.0965307	1	FALSE
Alkbh1	-0.120534	1	0.195667	1	-0.145463	1	0.0956829	1	-0.0776351	1	-0.208039	0.215968	-0.142098	1	-0.13699	1	0.0631812	1	-0.103948	1.46723e-21	-0.138406	1	-0.152249	1	-0.234175	1	-0.00352896	1	0.0252008	1	-0.0496373	1	-0.0550954	1	-0.113237	1	-0.116546	1	0.00920168	1	-0.220911	1	-0.0775981	1.67228e-06	FALSE	FALSE	-0.0694319	5.78237e-76	FALSE
Alkbh2	0.0769781	1	-0.194941	1	-0.0495066	1	0.130301	1	-0.221952	1	0.00950918	1	-0.0379086	1	-0.0736746	1	-0.0981467	1	0.0167321	1.19684e-07	-0.0447099	1	-0.0635194	1	0.0976362	1	-0.0356245	1	0.0348678	1	0.133407	1	-0.0780767	1	-0.00854635	1	0.0439248	1	-0.276726	1	-0.215653	1	-0.0407442	0.871585	FALSE	FALSE	-0.00845445	6.04612e-49	FALSE
Alkbh3	-0.0284074	1	0.166866	1	0.102676	1	0.269528	1	0.381881	1	0.0398795	1	-0.0497023	1	0.21167	1	0.0686744	1	0.0808383	1	0.215832	1	0.149586	1	0.0873606	1	0.098946	1	-0.0519935	1	-0.105284	1	0.1027	1	0.175826	1	0.116311	1	0.00271682	1	0.171845	1	0.105131	1	FALSE	FALSE	0.174543	1	FALSE
Alkbh5	0.241782	1	0.272095	1	-0.0443564	1	-0.364591	1	0.0125206	1	0.0737994	1	-0.0631947	1	0.195571	1	-0.117806	1	-0.0448933	1.12901e-07	0.0346046	1	0.0172533	1	-0.264966	1	0.0940276	1	-0.19848	1	-0.203722	1	0.115939	1	-0.170687	1	0.0904764	1	-0.314648	1	-0.182008	1	-0.0391088	0.86835	FALSE	FALSE	-0.0837892	7.77141e-58	FALSE
Alkbh6	-0.0224043	1	-0.00743047	1	-0.024103	1	-0.0526838	1	-0.115267	1	-0.0514626	1	-0.0110358	1	0.0872386	1	-0.0297361	1	-0.0100288	1.34051e-08	-0.0374985	1	0.0581021	1	0.104798	1	-0.0473934	1	-0.056523	1	-0.113368	1	0.139881	1	-0.0255431	1	0.0447729	1	-0.138093	1	-0.00699201	1	-0.0149891	0.720464	FALSE	FALSE	0.00646256	1.22883e-33	FALSE
Alkbh7	-0.072617	1	0.161542	1	0.0905069	1	-0.00152928	1	0.0686596	1	-0.0359444	1	-0.0355024	1	-0.0608329	1	0.128541	1	0.0149394	2.73816e-05	-0.0691058	1	0.0586759	1	0.1622	1	0.0333536	1	-0.058792	1	-0.192362	1	0.109598	1	-0.0444976	1	0.0347568	1	0.163155	1	0.0754014	1	0.0252451	0.997195	FALSE	FALSE	0.00808646	8.47356e-35	FALSE
Alkbh8	-0.174079	1	0.0977526	1	0.0675223	1	-0.208666	1	0.0925922	1	0.108957	1	-0.0143512	1	0.192587	1	-0.0362875	1	-0.0618622	1.69367e-17	-0.0364825	1	-0.184267	1	-0.0430625	1	0.0647603	1	0.184558	1	0.0230837	1	0.0702842	1	0.0387283	1	0.00346873	1	-0.0608403	1	0.0947127	1	0.0104337	0.000749196	FALSE	FALSE	-0.00814254	1.24053e-41	FALSE
Amd1	-0.387607	1	-0.0980635	1	0.0562468	1	-0.152965	1	-0.143006	1	-0.0576347	1	-0.224551	0.211214	-0.10942	1	-0.0290694	1	-0.00979424	3.40249e-08	-0.073249	1	-0.210902	1	-0.102772	1	-0.180952	1	-0.230345	1	0.098495	1	-0.236239	1	-0.0105537	1	-0.0816268	1	-0.0638321	1	-0.0821661	1	-0.110953	0.668572	FALSE	FALSE	-0.0932139	2.36559e-81	FALSE
Amd2	0.163428	1	0.258409	1	0.080315	1	0.143142	1	-0.0789023	1	0.186228	1	0.0484662	1	0.0915891	1	0.22975	1	0.150145	1	0.121989	1	0.0892267	1	0.24379	1	0.0660171	1	0.0533461	1	0.192731	1	0.241074	1	0.11544	1	0.224806	1	0.144892	1	-0.16548	1	0.123829	1	FALSE	FALSE	0.103763	1	FALSE
Amer1	-0.0363453	1	-0.0938958	1	-0.0227314	1	-0.115098	1	0.0750812	1	0.0213047	1	0.049874	1	0.169663	1	-0.108437	1	-0.0272344	5.67601e-11	0.0162248	1	-0.0410646	1	-0.113697	1	-0.0613141	1	0.194192	1	0.309632	1	-0.15315	1	-0.130485	1	0.0513393	1	0.110496	1	-0.101749	1	-0.000352211	0.268936	FALSE	FALSE	0.027718	1.53352e-24	FALSE
Amfr	-0.220739	1	0.169376	1	0.0175863	1	0.0395783	1	-0.0851626	1	-0.0566258	1	-0.0432307	1	-0.0404492	1	0.0961913	1	-0.0742343	4.37207e-20	-0.0367058	1	-0.077593	1	0.0382044	1	0.00202698	1	0.192746	1	-0.107842	1	-0.0775923	1	-0.371082	1	-0.234622	0.355374	0.226702	1	-0.111498	1	-0.0359507	1.68145e-05	FALSE	FALSE	-0.0984	5.18692e-99	FALSE
Ammecr1	-0.0177599	1	0.219676	1	-0.149931	1	0.161076	1	0.0341885	1	0.0658887	1	-0.086224	1	-0.097401	1	-0.0922167	1	-0.100963	3.18809e-28	-0.0506224	1	-0.242476	1	-0.0963093	1	-0.00158237	1	-0.177256	1	-0.307807	1	0.228762	1	-0.241434	1	-0.154131	1	-0.259793	1	-0.105786	1	-0.0701	2.03144e-10	FALSE	FALSE	-0.0725126	9.65674e-87	FALSE
Ammecr1l	0.105234	1	0.109583	1	-0.060744	1	-0.0322188	1	-0.0208447	1	0.0612583	1	0.0149697	1	0.0185337	1	0.063306	1	0.0395039	0.371872	0.117266	1	-0.00307686	1	0.048321	1	0.0486159	1	-0.0612408	1	0.07442	1	-0.192161	1	0.104258	1	-0.00627234	1	-0.0175786	1	-0.0952381	1	0.0150426	1	FALSE	FALSE	0.0340901	1.22072e-15	FALSE
Amn1	0.0720921	1	0.0192102	1	0.0822626	1	-0.0580106	1	0.0949263	1	-0.0245159	1	-0.112399	0.63358	-0.0695099	1	-0.0170743	1	-0.0387769	3.84208e-14	-0.00675034	1	0.000281591	1	0.0473412	1	-0.0593554	1	0.0931058	1	0.0692841	1	0.0375247	1	-0.00463946	1	-0.0780017	1	0.0228934	1	-0.192505	1	-0.00583888	0.0208193	FALSE	FALSE	-0.0285411	1.04702e-58	FALSE
Amot	0.0859731	1	0.0263104	1	0.12162	1	0.00139902	1	-0.0452816	1	0.0235774	1	0.0388825	1	0.0190999	1	0.0924466	1	0.00224123	2.56582e-05	0.0881956	1	0.0336537	1	-0.0422903	1	0.0269699	1	0.168386	1	0.1091	1	-0.0182526	1	0.0442337	1	0.0277018	1	-0.0530751	1	0.0334525	1	0.0373497	0.996993	FALSE	FALSE	0.0262859	5.04154e-16	FALSE
Amotl1	-0.285629	1	-0.107709	1	0.11624	1	0.142897	1	0.203472	1	0.13032	1	-0.185623	1	-0.0133951	1	0.200275	1	-0.0205301	2.57922e-07	0.0715759	1	0.0240437	1	0.202794	1	0.184008	1	-0.132222	1	-0.223352	1	0.202411	1	0.141915	1	0.018039	1	-0.0540866	1	0.226907	1	0.040112	0.909692	FALSE	FALSE	0.0311241	1.03865e-16	FALSE
Amotl2	-0.162308	1	-0.115894	1	-0.00468616	1	-0.132064	1	-0.0104605	1	0.185992	1	0.0594972	1	0.158161	1	0.180341	1	0.0256602	0.00255189	-0.0542335	1	0.116043	1	-0.130323	1	-0.0888926	1	0.281541	1	0.104841	1	-0.0206932	1	-0.0255907	1	0.173665	1	0.0990423	1	0.0731808	1	0.0339438	0.999999	FALSE	FALSE	0.012034	3.07916e-29	FALSE
Ampd2	-0.107657	1	0.133024	1	-0.0144446	1	-0.131016	1	-0.0941325	1	0.0174997	1	-0.147275	0.158469	-0.100435	1	-0.102151	1	-0.0539916	6.70444e-22	-0.0982533	1	0.0275186	1	0.10964	1	-0.0319107	1	-0.0365639	1	-0.0419865	1	0.0808222	1	-0.0909828	1	-0.0792074	1	-0.0905619	1	-0.0625701	1	-0.043554	8.56351e-07	FALSE	FALSE	-0.0887591	1.83556e-115	FALSE
Amz2	-0.171225	1	0.0858471	1	-0.0931912	1	-0.056868	1	-0.304676	1	-0.0650876	1	-0.027798	1	-0.0114062	1	-0.109862	1	0.00557916	1.32601e-06	-0.128888	0.000640201	0.027306	1	0.100475	1	0.0401379	1	-0.10868	1	0.0707857	1	-0.138439	1	-0.105919	1	-0.00742034	1	0.175125	1	0.0415334	1	-0.03727	0.480793	FALSE	FALSE	-0.0266129	1.58366e-62	FALSE
Anapc1	0.034454	1	0.266058	1	-0.255176	1	-0.0859555	1	0.110618	1	-0.084329	0.889533	-0.00195343	1	-0.035846	1	-0.0226612	1	-0.0606561	6.35408e-17	-0.0276091	1	-0.102641	1	0.0359022	1	0.0537293	1	0.116719	1	0.261738	1	0.0199948	1	0.0163525	1	-0.033039	1	0.24616	1	-0.00417022	1	0.0213185	0.0013657	FALSE	FALSE	0.00361776	6.04526e-31	FALSE
Anapc10	0.0965965	1	-0.178734	1	0.143312	1	-0.0754932	1	0.215753	1	-0.0668022	1	-0.0127798	1	-0.180514	1	-0.0625928	1	-0.0160825	1.71721e-09	0.0375467	1	0.072884	1	0.229959	1	0.010104	1	0.0712272	1	0.33941	1	-0.231116	1	-0.0458497	1	-0.0422598	1	0.0952715	1	-0.0353718	1	0.0173556	0.542879	FALSE	FALSE	-0.00900603	3.61508e-42	FALSE
Anapc11	0.0167929	1	-0.00521033	1	0.143746	1	-0.133929	1	-0.105526	1	-0.0504334	1	-0.0166538	1	0.0805528	1	0.145348	1	0.0196909	1	-0.000450846	1	0.0867054	1	0.0930846	1	0.00958819	1	0.172016	1	-0.221942	1	0.150711	1	0.0965056	1	-0.211582	1	-0.181482	1	-0.164222	1	-0.00365181	1	FALSE	FALSE	-0.0364194	2.87735e-11	FALSE
Anapc13	0.140634	1	0.054266	1	0.106921	1	-0.154976	1	0.31864	1	0.0426616	1	0.0973759	1	-0.183684	1	-0.0363663	1	-0.00932761	1.27485e-05	-0.0367131	1	-0.0153261	1	0.0784294	1	-0.0392637	1	-0.0276884	1	-0.187162	1	0.00825853	1	-0.0659296	1	0.0410427	1	0.0490423	1	0.0246065	1	0.00978287	0.993936	FALSE	FALSE	0.0327031	4.69933e-18	FALSE
Anapc15	-0.0621527	1	0.0930044	1	0.111271	1	-0.0172086	1	0.138948	1	0.100029	1	0.0475837	1	0.233189	1	-0.0467103	1	0.0334169	0.0284795	0.0391769	1	0.0428862	1	0.123109	1	0.0485782	1	0.0145978	1	-0.0795209	1	-0.0104285	1	0.00275525	1	-0.0116226	1	-0.0720769	1	0.0189005	1	0.035606	1	FALSE	FALSE	0.0152715	7.42659e-26	FALSE
Anapc16	0.129447	1	0.256269	1	-0.00144985	1	-0.177247	1	-0.0317859	1	-0.13123	1	-0.128851	1	-0.256384	1	-0.227353	1	-0.0287326	9.11007e-09	-0.10401	1	-0.0643208	1	-0.00122163	1	-0.245175	0.206302	-0.200443	1	0.0492131	1	0.278368	1	0.236429	1	-0.102561	1	-0.0269775	1	-0.191074	1	-0.0461473	0.550894	FALSE	FALSE	-0.0732888	1.48343e-63	FALSE
Anapc2	0.100564	1	-0.0245096	1	-0.172182	1	0.163201	1	0.0287701	1	0.0892691	1	0.144618	1	-0.0358497	1	0.0460348	1	0.0029984	1.44857e-07	0.0703398	1	-0.0138826	1	0.0934428	1	0.113767	1	0.310093	1	-0.172827	1	0.150577	1	-0.0628069	1	-0.0409151	1	-0.215359	1	0.217076	1	0.0377342	0.881839	FALSE	FALSE	0.108451	0.609726	FALSE
Anapc4	0.0376776	1	0.187958	1	0.0225961	1	0.0128671	1	0.0982096	1	0.209732	1	-0.118432	1	-0.112006	1	-0.0250547	1	-0.0318458	1.23275e-09	0.118236	1	-0.135944	1	-0.0725439	1	0.0484486	1	0.118697	1	-0.100488	1	-0.0533253	1	0.264981	1	-0.0102018	1	0.0539695	1	-0.137675	1	0.0178979	0.513529	FALSE	FALSE	-0.00539972	8.18018e-31	FALSE
Anapc5	-0.0749686	1	0.11561	1	0.0917915	1	-0.151706	1	-0.629032	1	-0.197059	1	-0.035018	1	-0.22595	1	-0.284845	1	-0.0633114	0.000309702	0.0635101	1	0.0929291	1	-0.0521935	1	0.0252322	1	0.0511682	1	0.0433517	1	0.220068	1	0.108055	1	-0.197223	1	-0.00456664	1	-0.155002	1	-0.0599599	0.999893	FALSE	FALSE	-0.0144831	2.00973e-08	FALSE
Anapc7	-0.163389	1	0.127873	1	0.0460234	1	0.234761	1	-0.0954707	1	-0.0278841	1	0.101648	1	-0.0674258	1	-0.0233184	1	0.0434969	0.00026972	0.112775	1	-0.0361106	1	-0.0143798	1	0.154257	1	-0.0692404	1	-0.0507664	1	0.0472978	1	0.118182	1	0.0379823	1	-0.154155	1	0.0724726	1	0.0187918	0.999865	FALSE	FALSE	0.030658	3.53464e-30	FALSE
Angel2	0.0719306	1	0.130551	1	0.0643542	1	0.0388577	1	0.25643	1	0.140522	1	0.118596	1	-0.00190741	1	0.117068	1	-0.024118	2.28355e-10	0.00462245	1	0.099887	1	0.0652835	1	0.187056	1	0.0976755	1	0.0400003	1	0.041711	1	0.375435	1	-0.0813939	1	-0.23439	1	-0.102594	1	0.0669322	0.370874	FALSE	FALSE	-0.00910011	6.98759e-44	FALSE
Angpt1	0.250046	1	-0.114036	1	0.224093	1	-0.069869	1	0.0794519	1	0.0946065	1	0.118061	1	0.277447	1	0.141313	1	0.0551163	1	0.131055	1	0.0158535	1	0.217328	1	0.209818	1	0.189836	1	0.234689	1	0.172938	1	0.210852	1	0.286375	1	-0.104565	1	0.142229	1	0.131554	1	FALSE	FALSE	0.115173	1	FALSE
Angptl2	0.123458	1	0.0991317	1	0.0525398	1	-0.196805	1	0.12986	1	0.100208	1	0.20945	1	-0.0194239	1	0.020837	1	-0.0577104	3.34893e-18	0.00619794	1	-0.0721116	1	0.0617451	1	0.075952	1	0.135374	1	-0.154503	1	-0.0698897	1	0.028334	1	-0.121949	1	0.0214135	1	0.116958	1	0.0232888	0.000325243	FALSE	FALSE	0.0282207	1.36573e-23	FALSE
Angptl4	0.0485827	1	0.238784	1	0.0444893	1	-0.171049	1	0.118635	1	0.234916	1	-0.107487	1	-0.0476878	1	-0.00778865	1	0.0580389	1	0.0723181	1	0.285813	1	-0.0802442	1	0.114075	1	0.238072	1	0.208494	1	0.066829	1	0.334755	1	0.000708651	1	-0.106718	1	0.109104	1	0.0786972	1	FALSE	FALSE	0.0952772	1	FALSE
Ank	-0.136164	1	0.164355	1	0.0514052	1	0.122065	1	0.189325	1	0.219809	1	0.330615	1	0.159099	1	0.0232108	1	0.104116	1	0.240039	1	-0.0375883	1	0.17054	1	0.375281	1	0.221978	1	0.403829	1	0.0155758	1	0.147456	1	7.80048e-05	1	0.156684	1	-0.0864384	1	0.135013	1	FALSE	FALSE	0.102688	0.00244622	FALSE
Ankfy1	-0.0318226	1	-0.0375572	1	-0.0760194	1	0.0456549	1	-0.261417	1	0.034361	1	-0.0349926	1	0.150225	1	-0.0415634	1	-0.029008	9.87481e-17	-0.0051854	1	-0.0593075	1	-0.208449	1	0.05876	1	-0.073933	1	-0.15835	1	-0.106095	1	-0.085977	1	0.0972393	1	0.0393559	1	-0.108223	1	-0.0424906	0.00179242	FALSE	FALSE	-0.019319	6.94998e-53	FALSE
Ankhd1	0.0470556	1	0.0518281	1	0.0308374	1	0.0478744	1	-0.0187332	1	0.0240552	1	-0.0217749	1	0.126713	1	-0.0525211	1	-0.0343178	7.67957e-13	0.0380407	1	-0.0846344	1	-0.0849047	1	0.0298383	1	-0.0334202	1	-0.0181617	1	-0.0154369	1	0.125836	1	0.113908	1	-0.0448577	1	0.174248	1	0.0191177	0.0753975	FALSE	FALSE	0.0131671	1.79729e-30	FALSE
Ankib1	-0.0810082	1	0.299086	1	-0.00544443	1	-0.305511	0.567512	-0.23994	1	0.213079	1	0.00600653	1	7.99861e-05	1	0.0351852	1	-0.027589	3.37433e-13	0.00725254	1	-0.0828141	1	-0.0896573	1	-0.0835008	1	-0.0226881	1	0.242154	1	-0.0104782	1	0.0318052	1	0.0944007	1	-0.0870071	1	0.221203	1	0.00545781	0.0461093	FALSE	FALSE	0.00526909	5.59255e-42	FALSE
Ankle2	-0.0642127	1	0.155776	1	-0.148593	1	-0.162744	1	-0.059247	1	0.000881825	1	-0.0562754	1	0.0285894	1	-0.114917	1	-0.0513358	5.87816e-21	-0.0935539	0.669769	-0.109829	1	-0.0836906	1	0.0328446	1	-0.0426827	1	-0.111413	1	0.136762	1	0.280181	1	-0.125749	1	-0.0333205	1	-0.0722691	1	-0.0330856	7.5564e-06	FALSE	FALSE	-0.0305133	6.47376e-65	FALSE
Ankmy2	-0.0850129	1	-0.0165485	1	-0.0496719	1	0.0300377	1	-0.113082	1	-0.00565912	1	0.0210421	1	0.0606557	1	0.0701748	1	-0.0183623	6.48487e-10	0.02288	1	0.0199143	1	-0.153136	1	0.0527505	1	0.0105631	1	-0.00171863	1	0.00588592	1	0.0785157	1	-0.108991	1	-0.042424	1	-0.0282236	1	-0.0119243	0.457467	FALSE	FALSE	0.000117769	8.73004e-34	FALSE
Ankra2	0.152736	1	0.149115	1	-0.0436658	1	0.169602	1	0.0470757	1	0.0654525	1	0.0173241	1	-0.117786	1	0.0752969	1	-0.0313198	2.78095e-12	-0.0122939	1	0.00552373	1	-0.145082	1	-0.0216325	1	0.195127	1	0.0208362	1	0.0583532	1	0.0977128	1	-0.149736	1	-0.201103	1	-0.0739416	1	0.0122664	0.114963	FALSE	FALSE	0.0227631	1.69489e-27	FALSE
Ankrd1	0.0449225	1	0.317194	1	0.00864183	1	-0.18932	1	-0.128484	1	0.262812	1	0.0557127	1	0.136978	1	-0.0845579	1	0.0841456	1	-0.0769062	1	0.0820268	1	0.276917	1	0.0552881	1	0.0615987	1	-0.124387	1	-0.335004	1	0.274439	1	0.017354	1	0.233366	1	-0.0375325	1	0.0445336	1	FALSE	FALSE	0.0468702	1.42592e-13	FALSE
Ankrd10	-0.0687717	1	-0.0477275	1	0.0647665	1	0.187774	1	-0.0676717	1	-0.030348	1	-0.14527	0.0790352	-0.10564	1	-0.121944	1	-0.0681895	4.59434e-13	-0.0546667	1	-0.109272	1	-0.0620676	1	-0.19868	0.125164	-0.0539736	1	-0.0153104	1	-0.0336041	1	0.0908555	1	-0.0577976	1	-0.108849	1	-0.0232126	1	-0.0490286	0.0103432	FALSE	FALSE	-0.0495165	3.35651e-61	FALSE
Ankrd11	-0.32316	1	0.206262	1	0.0827639	1	-0.0952362	1	0.15665	1	0.00141636	1	0.0210614	1	-0.00702978	1	-0.0309476	1	-0.0903558	0.489852	-0.125792	1	-0.0598564	1	0.0493677	1	0.0330968	1	0.0679625	1	0.056067	1	0.0460576	1	-0.166565	1	-0.141194	1	-0.0526156	1	0.105714	1	-0.0126825	1	FALSE	FALSE	-0.0977392	1.26969e-17	FALSE
Ankrd12	-0.0302755	1	-0.196975	1	-0.0618129	1	-0.0490153	1	0.11008	1	0.0581238	1	-0.00866709	1	0.110102	1	-0.0259813	1	0.0079944	0.00262482	0.0166778	1	-0.124858	1	-0.0908833	1	0.0959136	1	0.125518	1	0.0085267	1	0.0147967	1	-0.021129	1	-0.0557943	1	-0.118133	1	0.0242271	1	-0.0100745	0.999999	FALSE	FALSE	0.0327057	7.49362e-17	FALSE
Ankrd13a	-0.300202	1	-0.14494	1	0.083288	1	-0.150237	1	-0.024853	1	0.0381363	1	-0.0580766	1	0.0477859	1	-0.0659125	1	-0.0406133	2.38128e-15	-0.100404	1	-0.0448098	1	-0.0956603	1	-0.0264191	1	-0.0436158	1	0.00849433	1	0.0910048	1	0.0853231	1	-0.180841	0.800688	-0.116565	1	-0.069355	1	-0.0527843	0.00707831	FALSE	FALSE	-0.0639359	1.97519e-96	FALSE
Ankrd13b	-0.120435	1	-0.00828121	1	0.137472	1	-0.0439299	1	0.0661109	1	-0.0200011	1	-0.0746728	1	-0.150163	1	0.0688719	1	0.000474464	2.20717e-06	-0.0333823	1	0.0469338	1	-0.013637	1	0.0178135	1	-0.0718143	1	0.0170149	1	-0.0609826	1	-0.0636119	1	-0.05844	1	0.0686671	1	-0.0168487	1	-0.0148971	0.974565	FALSE	FALSE	0.0038439	7.62755e-29	FALSE
Ankrd13c	-0.143734	1	-0.0932236	1	-0.0520989	1	-0.11875	1	-0.199333	1	0.0151733	1	0.00244413	1	-0.245555	1	-0.0752312	1	-0.0484398	5.31036e-18	-0.000878054	1	-0.0470423	1	-0.111804	1	-0.100821	1	-0.060179	1	-0.229524	1	0.00617932	1	-0.133569	1	-0.011604	1	0.123417	1	-0.151922	1	-0.0798331	0.000413617	FALSE	FALSE	-0.0874371	8.93094e-115	FALSE
Ankrd17	0.326918	1	0.129867	1	0.0482488	1	-0.0686212	1	-0.638143	1	-0.00974008	1	-0.102732	1	-0.0135087	1	-0.147899	1	-0.151278	1.88395e-11	-0.0624907	1	-0.201677	1	-0.249012	1	0.165582	1	0.0535666	1	-0.205433	1	-0.0332752	1	0.364242	1	0.106001	1	-0.432908	1	0.00969273	1	-0.0529809	0.201808	FALSE	FALSE	-0.0954016	2.10848e-33	FALSE
Ankrd26	0.0405624	1	0.27118	1	-0.245417	1	0.0482373	1	0.0967093	1	-0.0205012	1	-0.0398984	1	0.0194103	1	-0.156567	1	-0.00796537	0.000391467	0.0248857	1	-0.106871	1	-0.00680694	1	0.219392	1	0.118247	1	0.0223046	1	0.0716546	1	-0.164447	1	0.0174666	1	-0.105477	1	0.0741773	1	0.00810838	0.999928	FALSE	FALSE	0.0253038	3.73061e-15	FALSE
Ankrd28	-0.0389586	1	-0.0798625	1	-0.0842331	1	0.0318809	1	0.0768796	1	0.0212786	1	0.0518836	1	0.0850876	1	0.0181858	1	0.0248907	0.0237739	0.113797	1	-0.0598622	1	0.0861987	1	0.102851	1	0.0682237	1	0.101939	1	0.0235895	1	-0.0255743	1	-0.133522	1	0.334773	1	0.145822	1	0.0412033	1	FALSE	FALSE	0.0425477	5.80748e-12	FALSE
Ankrd37	0.305304	1	0.0904224	1	-0.407811	1	-0.579071	1	-0.693927	1	-0.274647	1	-0.200779	1	-0.177132	1	-0.199745	1	-0.0237269	0.00322934	-0.0645995	1	-0.153054	1	0.17823	1	-0.341936	1	-0.626497	1	-0.259128	1	-0.499685	1	-0.605193	1	0.122496	1	-0.437525	1	-0.233793	1	-0.24199	0.999999	FALSE	FALSE	-0.370465	4.5944e-102	TRUE
Ankrd39	0.0946277	1	-0.0819367	1	0.00580891	1	0.0438746	1	0.245349	1	-0.0406296	1	0.0515634	1	-0.0306944	1	0.0415754	1	-0.00777629	4.20412e-07	0.0550984	1	-0.0210067	1	-0.0300646	1	-0.0152651	1	0.00540934	1	0.0520832	1	0.221114	1	-0.00410903	1	0.0377744	1	0.0629819	1	0.0534084	1	0.0351993	0.929625	FALSE	FALSE	0.0133367	3.06303e-28	FALSE
Ankrd40	-0.0646806	1	-0.119312	1	-0.162405	1	-0.0680507	1	0.104324	1	-0.0187864	1	-0.0920119	1	0.0857475	1	0.0195118	1	-0.0185029	3.1872e-09	-0.0522387	1	-0.0585568	1	0.0171689	1	0.111347	1	-0.00599245	1	-0.133477	1	0.301169	1	0.0509786	1	-0.00245131	1	0.069437	1	0.156254	1	0.00568912	0.597752	FALSE	FALSE	0.0368379	1.07215e-20	FALSE
Ankrd49	-0.0680325	1	0.0383429	1	-0.0175867	1	-0.135021	1	0.0383618	1	0.0539291	1	0.156	1	-0.100478	1	0.124703	1	0.0266311	0.00640089	0.016267	1	0.149164	1	0.251978	1	0.103181	1	0.0251713	1	0.294392	1	0.22217	1	0.271398	1	0.0163465	1	-0.155683	1	-0.0345415	1	0.0607949	1	FALSE	FALSE	0.057347	4.16758e-09	FALSE
Ankrd50	-0.159015	1	0.278123	1	-0.0184608	1	-0.109431	1	0.0472779	1	0.0636657	1	0.0131401	1	-0.00740943	1	0.0709253	1	-0.0544333	8.65124e-15	-0.0545766	1	-0.192695	1	-0.165914	1	-0.00145918	1	0.129817	1	-0.356878	1	-0.0177034	1	-5.76997e-06	1	-0.062394	1	-0.250064	1	0.159203	1	-0.0327757	0.0135984	FALSE	FALSE	-0.0313407	1.08931e-57	FALSE
Ankrd54	0.0342853	1	0.165566	1	-0.155668	1	-0.127998	1	-0.0268159	1	0.119103	1	-0.0552938	1	0.0877699	1	-0.0201911	1	0.027312	0.00288878	-0.112541	0.510916	-0.0480611	1	0.0187314	1	0.199774	1	0.0196735	1	-0.0575099	1	0.3356	1	-0.132043	1	0.113478	1	0.127922	1	-0.027735	1	0.0231123	0.999995	FALSE	FALSE	0.0361578	7.83235e-18	FALSE
Ankrd9	-0.211612	1	-0.0023779	1	0.0494619	1	0.0103405	1	-0.05834	1	-0.0224032	1	0.211133	1	-0.0957178	1	-0.0622035	1	-0.0111448	2.05997e-08	-0.0555609	1	0.00607819	1	-0.0376436	1	0.13555	1	-0.0808408	1	0.0621291	1	-0.25787	1	-0.0512276	1	-0.038628	1	0.0692047	1	-0.21372	1	-0.0312092	0.7544	FALSE	FALSE	-0.0524985	6.97248e-59	FALSE
Anks1b	0.0550283	1	-0.0936589	1	0.0293221	1	0.13263	1	-0.200449	1	0.0410884	1	0.0477552	1	-0.120944	1	-0.0255226	1	-0.00727038	4.18044e-08	0.0224213	1	-0.123381	1	-0.115587	1	-0.104433	0.174178	0.0188391	1	-0.0588035	1	-0.0244587	1	-0.0628352	1	-0.114508	1	-0.0141744	1	-0.0230781	1	-0.0353342	0.66969	FALSE	FALSE	-0.0566197	9.31343e-90	FALSE
Ankzf1	0.00596328	1	-0.0924	1	-0.00763324	1	0.0324966	1	-0.176961	1	0.0044601	1	0.0696369	1	-0.0328886	1	-0.00995315	1	-0.0234808	7.44755e-12	0.0453665	1	-0.0664815	1	-0.104873	1	-0.0354991	0.636687	0.0907708	1	0.0896351	1	-0.0625469	1	-0.0994895	1	0.0463361	1	-0.110882	1	-0.084836	1	-0.0249171	0.135574	FALSE	FALSE	-0.00202567	1.00857e-34	FALSE
Anln	-0.325801	1	-0.0868399	1	-0.394866	1	0.561127	1	-0.561445	1	-0.0199886	1	0.132968	1	-0.399374	1	-0.196377	1	0.0360233	1	0.115486	1	-0.0152507	1	0.165587	1	-0.0486097	1	0.246139	1	-0.000459852	1	0.0613318	1	0.0236319	1	0.303107	1	-0.233953	1	-0.0929427	1	-0.034786	1	FALSE	FALSE	0.0063377	1.99157e-07	FALSE
Ano10	0.0107137	1	-0.157178	1	0.138498	1	0.1006	1	-0.0282669	1	0.0481004	1	-0.00649094	1	0.198392	1	0.0456489	1	0.0123574	2.49297e-05	0.0559785	1	-0.0727636	1	-0.0376695	1	0.173447	1	-0.0522596	1	-0.0387984	1	0.125744	1	-0.0338962	1	0.122837	1	0.125022	1	-0.132866	1	0.0284357	0.9969	FALSE	FALSE	0.0532865	2.99088e-16	FALSE
Ano6	0.0220413	1	0.189617	1	0.234302	1	0.0462437	1	-0.0040396	1	0.100522	1	0.195529	1	-0.0450949	1	0.0521924	1	0.0483841	1	0.0152729	1	0.093844	1	-0.137336	1	0.125264	1	0.333885	1	0.286435	1	0.169268	1	0.302396	1	-0.0202063	1	0.219227	1	-0.0686087	1	0.102816	1	FALSE	FALSE	0.10026	0.477213	FALSE
Anp32a	0.0773794	1	-0.156954	1	0.0996504	1	-0.185758	1	-0.240792	1	-0.111391	1	0.0728838	1	-0.375271	1	-0.0675588	1	-0.0761248	8.23024e-05	-0.0654242	1	-0.187743	1	-0.263939	1	-0.311751	0.126957	0.0160589	1	0.154635	1	0.116825	1	-0.19219	1	-0.236523	1	-0.127254	1	-0.182	1	-0.106821	0.992706	FALSE	FALSE	-0.0480619	4.20483e-23	FALSE
Anp32e	-0.192672	1	-0.0965121	1	-0.321855	1	0.175758	1	0.154753	1	0.0706072	1	0.0803026	1	-0.0483563	1	0.0726185	1	0.0968086	1	0.0138268	1	-0.0129997	1	-0.0134615	1	0.00603743	1	0.103494	1	-0.176819	1	0.029311	1	0.0992369	1	-0.0157836	1	0.0464307	1	0.06191	1	0.00631601	1	FALSE	FALSE	0.0235685	1	FALSE
Antxr1	0.109153	1	-0.208877	1	0.10505	1	0.216984	1	-0.044647	1	0.0038651	1	0.0475702	1	0.266268	1	0.0443352	1	0.0194913	0.0128382	0.0961657	1	-0.0652877	1	0.137947	1	0.17394	1	0.322218	1	-0.226144	1	0.0589622	1	0.126458	1	0.0960842	1	-0.130274	1	0.175169	1	0.0630682	1	FALSE	FALSE	0.102153	0.0998962	FALSE
Antxr2	-0.104442	1	0.201179	1	0.152335	1	0.0351853	1	-0.0557553	1	-0.100137	0.430797	-0.077333	1	-0.273144	1	-0.0203459	1	-0.0931528	1.35386e-31	-0.0579713	1	-0.200561	1	-0.183821	1	-0.0647528	1	-0.23598	1	-0.174636	1	0.0268363	1	-0.00738856	1	-0.0338772	1	-0.0136163	1	0.000960644	1	-0.0609723	4.51953e-13	FALSE	FALSE	-0.112462	1.44788e-141	FALSE
Anxa1	0.391563	1	0.368118	1	0.0120293	1	-0.180882	1	-0.0167636	1	-0.213979	1	0.347108	1	0.22298	1	-0.0151937	1	0.0970233	1	0.281813	1	0.535871	1	0.119703	1	0.310379	1	0.0208965	1	-0.6888	1	0.164973	1	0.341384	1	0.272836	1	0.452158	1	0.107546	1	0.13956	1	FALSE	FALSE	0.141476	0.000169047	FALSE
Anxa11	0.136465	1	-0.0914129	1	0.162608	1	0.181144	1	-0.0678312	1	-0.0655364	1	-0.0816092	1	-0.171222	1	-0.0732388	1	0.0458373	0.00114129	0.128575	1	-0.142807	1	-0.219999	1	0.00898456	1	-0.160032	1	0.113192	1	0.0425505	1	-0.0215447	1	0.00322042	1	-0.305226	1	0.0778361	1	-0.0238117	0.999991	FALSE	FALSE	-0.0132928	1.78676e-53	FALSE
Anxa2	0.260425	1	0.201219	1	0.00320877	1	0.128247	1	-0.100437	1	-0.000531346	1	-0.0202993	1	-0.0219339	1	0.0658502	1	0.123601	0.00374328	0.0228231	1	0.0661088	1	0.0525326	1	0.092466	1	-0.137255	1	-0.152207	1	-0.0375099	1	0.147492	1	0.267994	1	0.207671	1	-0.0485563	1	0.0533766	1	FALSE	FALSE	0.0705158	5.67928e-05	FALSE
Anxa3	0.0942487	1	-0.0661236	1	0.138752	1	-0.225043	1	-0.572184	1	-0.0307102	1	-0.134782	1	0.136826	1	-0.198797	1	0.00653337	1	0.118402	1	-0.0848612	1	-0.00341196	1	0.0224538	1	0.0560678	1	0.0323047	1	0.291344	1	-0.0386849	1	-0.0475338	1	0.0876655	1	-0.165413	1	-0.0277594	1	FALSE	FALSE	-0.050366	3.56523e-07	FALSE
Anxa4	0.328383	1	-0.0255831	1	0.249911	1	-0.072366	1	0.287021	1	-0.00591264	1	0.153033	1	0.129471	1	0.147466	1	0.0474568	1	0.200247	1	0.0302803	1	-0.053261	1	0.127289	1	0.175712	1	0.358423	1	0.185159	1	0.230325	1	0.141819	1	0.0844671	1	0.182167	1	0.138167	1	FALSE	FALSE	0.190597	9.95204e-06	FALSE
Anxa5	0.185336	1	-0.120461	1	0.169156	1	0.00527325	1	-0.106624	1	0.0131235	1	-0.0739013	1	-0.163976	1	0.0593178	1	0.0282204	1	0.0203359	1	0.110845	1	-0.0183481	1	0.135729	1	-0.163832	1	-0.0683818	1	0.419544	1	0.258648	1	0.252455	1	-0.246016	1	0.0518518	1	0.0356331	1	FALSE	FALSE	-0.0119544	1	FALSE
Anxa7	0.241153	1	0.0935524	1	-0.0367535	1	0.349022	1	0.0916071	1	-0.0411217	1	0.024476	1	-0.0317545	1	0.0610809	1	-0.0303848	2.0643e-09	0.0337818	1	0.202029	1	-0.192726	1	-0.0477746	1	-0.0370567	1	-0.128	1	-0.0388775	1	0.196965	1	-0.00411007	1	-0.0624371	1	-0.076654	1	0.0269533	0.559228	FALSE	FALSE	0.0373415	1.34706e-13	FALSE
Anxa8	0.186733	1	0.0560528	1	0.109517	1	-0.0237858	1	0.650877	1	0.221415	1	0.107414	1	0.843017	1	0.343693	1	0.210873	0.000707643	0.331453	1	0.387241	1	0.178183	1	0.420817	1	0.445494	1	0.105725	1	0.0751808	1	0.400888	1	0.131669	1	0.334786	1	0.653084	1	0.293825	0.999976	FALSE	FALSE	0.359781	4.5708e-46	FALSE
Ap1ar	-0.159621	1	-0.10701	1	-0.00433723	1	-0.147903	1	-0.123896	1	-0.0299993	1	-0.0567787	1	-0.171732	1	-0.161734	1	-0.127406	2.52554e-28	0.0260624	1	0.0671137	1	-0.111117	1	-0.130748	1	-0.0633628	1	0.080011	1	0.0549255	1	-0.0214574	1	0.0728221	1	-0.124484	1	0.0216849	1	-0.0580461	1.72918e-10	FALSE	FALSE	-0.0726568	2.65482e-71	FALSE
Ap1b1	-0.095178	1	0.149623	1	0.0389588	1	-0.0291552	1	0.0667055	1	0.122365	1	0.0967759	1	0.0268976	1	0.0358294	1	0.0252065	0.00561824	-0.0002525	1	0.152589	1	0.0619002	1	0.132866	1	0.115184	1	-0.0856513	1	0.00159336	1	-0.127389	1	0.178483	1	0.046388	1	0.202393	1	0.0531492	1	FALSE	FALSE	0.0653219	5.38761e-08	FALSE
Ap1g1	0.023808	1	0.0340615	1	-0.0228748	1	-0.266233	1	0.0911852	1	0.211249	1	-0.00399295	1	-0.182429	1	-0.100077	1	-0.00335563	1.06528e-06	0.0746681	1	0.114011	1	-0.0622832	1	0.133954	1	0.163881	1	0.0744265	1	0.0264407	1	-0.0218258	1	0.146211	1	-0.0909155	1	0.0457918	1	0.0183667	0.958806	FALSE	FALSE	0.00491174	9.06494e-32	FALSE
Ap1m1	-0.0160299	1	0.153055	1	-0.0477989	1	-0.0657978	1	0.0699887	1	0.0317107	1	-0.0500837	1	-0.00367168	1	-0.0362689	1	0.0251494	0.000102222	-0.000466596	1	-0.00661053	1	0.069403	1	0.0702189	1	0.0460382	1	0.133148	1	0.0303156	1	-0.376855	1	0.112632	1	0.0621113	1	0.0733258	1	0.0130245	0.99943	FALSE	FALSE	-0.0246761	8.75147e-56	FALSE
Ap1s1	0.0865035	1	0.0551799	1	0.212642	1	-0.128511	1	-0.224669	1	-0.00343835	1	0.110496	1	0.201928	1	0.0926611	1	0.0974538	1	0.0500583	1	-0.00169747	1	-0.0772773	1	0.0806962	1	-0.0436835	1	-0.00846014	1	0.196452	1	0.00366948	1	-0.0689124	1	0.148324	1	-0.0670169	1	0.0339237	1	FALSE	FALSE	0.0809174	1	FALSE
Ap1s2	-0.0607809	1	-0.247684	1	0.00208412	1	-0.222828	1	-0.0728817	1	0.0350573	1	-0.140605	0.00195466	-0.177246	1	-0.209813	1	-0.0183141	3.34062e-07	-0.00768341	1	0.141666	1	0.104504	1	-0.018302	1	-0.212681	1	0.146709	1	0.129658	1	-0.211058	1	0.0894047	1	-0.00466098	1	-0.0702757	1	-0.0488444	0.458061	FALSE	FALSE	-0.0909417	1.22409e-108	FALSE
Ap2a1	0.106873	1	-0.135679	1	-0.20644	1	0.0121924	1	0.0717037	1	0.0350933	1	-0.0140283	1	-0.0764731	1	0.0170759	1	-0.0166259	2.82622e-13	0.00362599	1	0.111197	1	0.00956069	1	0.0219778	1	-0.0873151	1	-0.0634102	1	-0.0350064	1	0.0202439	1	-0.0511137	1	0.0372154	1	-0.0470132	1	-0.0136355	0.0531181	FALSE	FALSE	0.0094193	3.18113e-37	FALSE
Ap2a2	0.16204	1	0.0788523	1	0.116086	1	0.0195712	1	0.364434	1	0.309011	1	0.196432	1	0.0835694	1	0.0188414	1	0.153717	1	0.14927	1	0.175322	1	0.0316208	1	0.45316	1	0.15172	1	0.259081	1	0.27766	1	-0.151718	1	-0.00783469	1	0.305356	1	0.13674	1	0.15633	1	FALSE	FALSE	0.172568	1	FALSE
Ap2b1	0.0869963	1	0.0937428	1	0.510264	1	0.144006	1	0.0297824	1	0.321385	1	0.205939	1	0.0833643	1	0.41309	1	0.144122	1	0.0304741	1	0.39353	1	0.0880005	1	0.425288	1	0.420496	1	0.00572237	1	0.274014	1	0.317305	1	0.207935	1	0.117565	1	0.109209	1	0.210582	1	FALSE	FALSE	0.207278	1.46058e-10	FALSE
Ap2m1	-0.0193201	1	-0.333551	1	-0.156551	1	-0.218964	1	0.523804	1	-0.0283815	1	0.0728458	1	-0.324845	1	0.150166	1	0.00603519	1	-0.0691597	1	0.0233748	1	0.0674795	1	-0.0478544	1	-0.0877741	1	0.376082	1	0.348095	1	0.132265	1	0.00610883	1	-0.125587	1	0.0826468	1	0.0179484	1	FALSE	FALSE	0.0153627	0.0484336	FALSE
Ap2s1	-0.18389	1	-0.059959	1	0.142191	1	0.0802666	1	0.307957	1	0.0305942	1	0.0291897	1	0.2952	1	0.199894	1	0.0873892	1	0.130068	1	0.0838647	1	0.107451	1	0.198509	1	0.287225	1	0.158826	1	0.18245	1	0.0170194	1	0.0161451	1	-0.00356264	1	-0.215839	1	0.0900471	1	FALSE	FALSE	0.0885045	1	FALSE
Ap3b1	0.112058	1	-0.123552	1	0.0803483	1	0.107701	1	-0.0747896	1	0.166035	1	0.0728164	1	0.192922	1	0.0293836	1	0.0128919	0.000512779	0.0355534	1	-0.0796149	1	-0.276135	1	0.162636	1	-0.175187	1	-0.0159769	1	0.031984	1	-0.0228184	1	-0.0969434	1	0.0892816	1	0.144889	1	0.0177848	0.999956	FALSE	FALSE	0.0990178	0.57305	FALSE
Ap3d1	0.149269	1	0.330467	1	0.167175	1	-0.100873	1	0.0678225	1	0.147886	1	-0.0364181	1	0.0433994	1	0.150263	1	0.0511838	0.0332561	0.0297828	1	-0.0256717	1	-0.0190756	1	0.0820329	1	0.052195	1	0.320983	1	0.117422	1	0.037941	1	0.111219	1	-0.0807184	1	0.00482261	1	0.0762432	1	FALSE	FALSE	0.0375278	6.01487e-24	FALSE
Ap3m1	0.115876	1	0.0388079	1	-0.0753226	1	-0.206052	1	-0.135113	1	0.0812806	1	-0.0278846	1	0.165958	1	-0.0731583	1	-0.052354	1.28558e-19	-0.0739153	1	0.00364342	1	0.238111	1	0.033521	1	0.0287917	1	0.0855382	1	0.0983524	1	-0.248542	1	0.0846936	1	-0.169418	1	-0.0871266	1	-0.00830056	5.57445e-05	FALSE	FALSE	-0.0447743	1.40127e-74	FALSE
Ap3s1	0.329728	1	-0.0652912	1	-0.00547203	1	-0.0688438	1	0.112999	1	0.0297987	1	-0.00680303	1	-0.100027	1	0.0887307	1	-0.00153795	7.71106e-05	0.155975	1	0.104911	1	0.161828	1	0.049356	1	9.53471e-05	1	-0.0427411	1	0.0441202	1	-0.0937672	1	0.0556464	1	-0.166567	1	0.150302	1	0.0348781	0.999173	FALSE	FALSE	0.0675503	8.96078e-12	FALSE
Ap3s2	-0.023536	1	0.1466	1	0.00318856	1	-0.0113556	1	0.222594	1	-0.00992876	1	0.0193389	1	0.123826	1	0.0448658	1	0.00728079	5.18577e-05	0.0722684	1	-0.112764	1	-0.0304424	1	-0.0202252	1	-0.0343873	1	-0.0019124	1	0.0328384	1	0.0822149	1	0.0266892	1	-0.0837385	1	-0.0440387	1	0.0194941	0.998644	FALSE	FALSE	0.0118703	9.1226e-32	FALSE
Ap4m1	0.0975375	1	0.00616802	1	-0.131891	1	-0.0160089	1	-0.120631	1	0.0934201	1	0.0293074	1	0.000556913	1	0.0367151	1	0.00175104	2.97605e-09	0.0393984	1	-0.0633569	1	0.202784	1	0.0147516	1	0.160649	1	-0.177905	1	-0.0935234	1	-0.0535366	1	-0.0966306	1	-0.0375326	1	-0.0319478	1	-0.00666306	0.591688	FALSE	FALSE	0.0310525	8.05899e-22	FALSE
Ap4s1	0.0846164	1	-0.150353	1	-0.0320438	1	0.0541169	1	0.238642	1	-0.0163086	1	-0.0411376	1	-0.0484405	1	-0.228135	1	0.0172575	0.000145471	-0.0158773	1	-0.0978861	1	0.230098	1	-0.0275654	1	0.053416	1	-0.0027415	1	0.22242	1	0.0100526	1	-0.0672296	1	0.0930383	1	0.0377412	1	0.0149371	0.999653	FALSE	FALSE	-0.0559387	4.39082e-73	FALSE
Apba3	0.0883822	1	-0.053254	1	-0.162009	1	-0.0236147	1	-0.0397655	1	-0.116859	4.33855e-06	-0.0328958	1	-0.133974	1	0.101803	1	-0.0322432	1.52257e-18	0.0145244	1	-0.10525	1	-0.0179184	1	-0.125091	1	-0.183446	1	-0.00159377	1	-0.0645079	1	-0.0705516	1	-0.0291004	1	-0.0597665	1	-0.00645969	1	-0.050171	1.50394e-07	FALSE	FALSE	-0.0412686	4.45932e-78	FALSE
Apbb2	-0.133122	1	0.110316	1	-0.126961	1	-0.0365248	1	-0.219436	1	0.0635977	1	-0.11077	1	0.0196204	1	-0.180099	1	-0.222572	2.17159e-40	0.030997	1	-0.107351	1	-0.13809	1	-0.0497732	1	-0.0169065	1	-0.215053	1	-0.18031	1	-0.21345	1	-0.171976	1	-0.433095	1	-0.153746	1	-0.118319	1.85535e-19	FALSE	FALSE	-0.0561244	2.98741e-47	FALSE
Apc	0.0514353	1	-0.0409324	1	0.0954606	1	0.000457119	1	0.23003	1	0.00634125	1	0.115697	1	-0.290758	1	-0.0743981	1	-0.0385626	1.33444e-11	-0.0282151	1	0.0319947	1	0.126438	1	0.109215	1	-0.0335086	1	0.259776	1	0.157731	1	0.134313	1	-0.0350486	1	-0.135471	1	0.204802	1	0.0403236	0.183428	FALSE	FALSE	0.0165805	2.46228e-29	FALSE
Apeh	-0.0100327	1	-0.161018	1	0.149508	1	-0.143983	1	-0.0551601	1	0.0389774	1	0.0189361	1	-0.0424454	1	0.146125	1	-0.0149488	3.22784e-08	0.0389151	1	-0.0414613	1	0.0716598	1	-0.00114876	1	0.14159	1	0.166535	1	0.00733138	1	-0.0472148	1	-0.0146034	1	0.106556	1	-0.161848	1	0.00915567	0.787898	FALSE	FALSE	0.0120231	3.16478e-35	FALSE
Apex1	-0.0810334	1	-0.194517	1	-0.0212291	1	-0.0361391	1	-0.16306	1	0.0311498	1	0.20275	1	0.0851222	1	-0.0162266	1	0.0898865	1	0.036808	1	-0.117255	1	0.156938	1	0.00527616	1	0.174672	1	0.200264	1	0.0818994	1	0.233969	1	-0.210917	1	-0.0801887	1	-0.0802937	1	0.0141845	1	FALSE	FALSE	0.127495	1	FALSE
Apex2	-0.0688098	1	0.058924	1	-0.0615955	1	0.0276647	1	-0.0439737	1	0.0413238	1	-0.065352	1	0.0902938	1	-0.00512047	1	0.021363	0.000422646	0.0509252	1	0.00614729	1	0.0491544	1	0.0131648	1	0.0624114	1	0.0143318	1	0.122778	1	-0.163785	1	-0.0272274	1	0.0592925	1	0.0432312	1	0.010721	0.999937	FALSE	FALSE	0.0342225	2.03529e-12	FALSE
Aph1a	-0.0397888	1	-0.3783	1	-0.173353	1	-0.17846	1	-0.259812	1	0.0584982	1	-0.101552	1	0.000684056	1	-0.105743	1	-0.051583	4.44481e-12	0.0550009	1	0.15068	1	-0.100326	1	-0.0264754	1	-0.0420944	1	-0.0860967	1	0.185469	1	0.145194	1	-0.0181983	1	0.122456	1	-0.159347	1	-0.0477689	0.132934	FALSE	FALSE	-0.0114301	3.32423e-32	FALSE
Api5	0.0519365	1	-0.24266	1	-0.0880157	1	-0.131013	1	-0.164778	1	0.0295835	1	-0.00910429	1	0.1291	1	-0.0741585	1	-0.0398256	1.83019e-07	-0.0287381	1	0.0237466	1	-0.0854403	1	0.082593	1	0.059207	1	0.320798	1	-0.062778	1	-0.253061	1	0.0870694	1	-0.348186	1	-0.174045	1	-0.0437033	0.893697	FALSE	FALSE	0.0433873	7.37569e-10	FALSE
Apip	0.0336642	1	-0.0148486	1	0.205275	1	0.0672783	1	-0.129205	1	0.000503971	1	0.0613449	1	0.168175	1	0.136542	1	-0.0248363	2.76701e-08	0.0325032	1	-0.0122172	1	-0.0675005	1	0.0118192	1	0.0393335	1	-0.316357	1	-0.0948707	1	-0.0497216	1	-0.0818919	1	0.0375736	1	0.0552722	1	0.00275412	0.776655	FALSE	FALSE	0.0933021	0.00264805	FALSE
Aplf	0.0611845	1	0.0476917	1	0.0181691	1	-0.109158	1	-0.0184464	1	0.0399078	1	0.0236044	1	0.0896829	1	0.0399136	1	0.022749	1	0.123868	1	-0.0981856	1	-0.0356151	1	0.0427953	1	0.161397	1	0.0167613	1	0.0899995	1	-0.0831844	1	-0.056088	1	0.0929889	1	-0.0088068	1	0.0219633	1	FALSE	FALSE	0.0319689	1.5938e-10	FALSE
Aplp2	-0.177398	1	0.240832	1	0.308638	1	0.263986	1	0.146873	1	0.284373	1	0.156268	1	0.225069	1	-0.00451311	1	-0.0319998	1	0.21743	1	-0.00316276	1	-0.14901	1	-0.454943	1	0.234285	1	0.00849061	1	0.0428544	1	0.167931	1	-0.100054	1	-0.161695	1	-0.138101	1	0.0512454	1	FALSE	FALSE	0.130046	1	FALSE
Apobr	0.125634	1	0.0816416	1	0.15616	1	0.056248	1	0.220694	1	0.0861129	1	0.013976	1	0.218859	1	0.0844446	1	-0.0153015	1.52744e-06	0.0326394	1	0.00467524	1	-0.0185872	1	0.0711501	1	0.0822465	1	-0.119571	1	-0.129642	1	0.0788556	1	-0.0579236	1	0.0990962	1	0.13707	1	0.0575465	0.967308	FALSE	FALSE	0.129153	0.922788	FALSE
Apol9a	0.402762	1	0.0151392	1	0.223464	1	0.108837	1	0.0753346	1	0.0926733	1	-0.100427	1	0.199607	1	-0.0468013	1	-0.00056629	0.00959299	0.144952	1	-0.14584	1	-0.160579	1	0.229988	1	-0.335094	1	0.15522	1	-0.0881873	1	0.0846963	1	0.314996	1	-0.0611642	1	0.0903203	1	0.0571109	1	FALSE	FALSE	0.0124931	7.2617e-20	FALSE
Apol9b	-0.0243292	1	0.0444891	1	-0.108316	1	-0.0807175	1	-0.0743596	1	0.071557	1	-0.127502	1	0.205683	1	-0.07535	1	-0.037796	2.58862e-09	0.00715064	1	-0.0509785	1	-0.093849	1	0.0551219	1	-0.013531	1	-0.00945411	1	-0.27083	1	0.0445861	1	-0.205744	1	0.0457436	1	0.0961675	1	-0.0286789	0.579326	FALSE	FALSE	-0.0603792	2.86122e-54	FALSE
Apoo	0.00520455	1	-0.198692	1	0.099301	1	-0.105689	1	0.204656	1	-0.0510942	1	-0.033928	1	-0.0142733	1	-0.148761	1	-0.0351583	9.24782e-08	-0.0271252	1	0.0206614	1	0.0821593	1	-0.0971296	1	-0.0791471	1	0.0965761	1	-0.194143	1	-0.0212302	1	-0.0913432	1	0.0249332	1	-0.0879722	1	-0.0310569	0.856923	FALSE	FALSE	-0.029826	1.5762e-45	FALSE
Apool	0.0181261	1	-0.0788861	1	0.44669	1	-0.0328709	1	0.233391	1	0.083874	1	-0.0312936	1	0.225884	1	0.0381259	1	-0.0288311	8.61112e-09	0.0944919	1	0.0495949	1	0.0817478	1	-0.0173946	1	-0.00435861	1	-0.149389	1	0.0362093	1	0.167299	1	0.0450766	1	0.091032	1	0.0373278	1	0.0621832	0.683899	FALSE	FALSE	0.127697	1	FALSE
Apopt1	0.105726	1	0.32545	1	0.0362484	1	-0.198488	1	-0.273417	1	-0.0534876	1	-0.122222	1	-0.101425	1	-0.112678	1	-0.0241798	3.04003e-14	-0.0196449	1	-0.115488	1	-0.255354	1	-0.137312	1	-0.0100264	1	0.128379	1	0.00242482	1	0.0132514	1	-0.0170101	1	0.0280771	1	-0.0927123	1	-0.0425661	0.0227617	FALSE	FALSE	-0.0156665	1.64422e-48	FALSE
App	0.159187	1	0.202829	1	-0.0994575	1	0.202367	1	-0.537904	1	0.264849	1	0.149443	1	0.0589775	1	0.228525	1	-0.00932655	0.844577	0.137192	1	0.0127678	1	0.242089	1	0.138634	1	0.237202	1	0.442509	1	-0.0178982	1	-0.0571113	1	0.0503262	1	0.0581014	1	-0.0635327	1	0.0857033	1	FALSE	FALSE	-0.0456226	2.99868e-18	FALSE
Appbp2	0.00890861	1	-0.176812	1	-0.0554734	1	-0.121942	1	-0.236736	1	-0.078548	1	0.00564907	1	-0.171355	1	-0.0378258	1	-0.0461326	4.34593e-11	0.0185169	1	-0.150391	1	-0.244868	1	-0.0576056	1	-0.073377	1	-0.41522	1	0.107144	1	-0.0630301	1	-0.0728186	1	-0.0379794	1	-0.138472	1	-0.0970651	0.251525	FALSE	FALSE	-0.0554982	3.02382e-62	FALSE
Appl1	0.0556498	1	0.192803	1	-0.154289	1	-0.0210429	1	-0.306795	1	0.10147	1	0.150856	1	-0.074052	1	0.0633932	1	-0.00315674	3.18129e-05	0.0744292	1	0.0915565	1	-0.0400564	1	0.0963891	1	0.175381	1	0.114948	1	-0.0581303	1	0.289198	1	0.0617618	1	0.0114562	1	0.150592	1	0.046303	0.997618	FALSE	FALSE	-0.000461783	1.25518e-27	FALSE
Aprt	-0.0194053	1	-0.215012	1	0.128346	1	-0.111866	1	0.177186	1	-0.0995237	1	-0.0686024	1	0.174119	1	-0.0401572	1	0.104539	0.00237559	0.00158812	1	0.121169	1	0.266408	1	-0.0195319	1	0.0402695	1	0.167167	1	0.17974	1	-0.0863903	1	0.0762883	1	-0.102831	1	0.0164029	1	0.0328525	0.999998	FALSE	FALSE	0.0359493	1	FALSE
Aptx	0.187858	1	0.0931363	1	0.0564163	1	-0.0663188	1	0.125768	1	-0.0328252	1	0.0320614	1	-0.1491	1	0.137513	1	0.00691346	0.00168422	0.125587	1	-0.0284203	1	-0.0228354	1	0.0788081	1	-0.0756119	1	-0.0246529	1	0.119384	1	-0.0656386	1	-0.0598703	1	-0.17946	1	0.0168071	1	0.01312	0.999996	FALSE	FALSE	0.00209454	1.13175e-36	FALSE
Aqr	-0.0590138	1	0.390991	1	-0.0527302	1	-0.00958174	1	0.00735643	1	0.0681999	1	-0.0772391	1	-0.0579515	1	0.113574	1	-0.038742	4.0258e-09	-0.0267022	1	0.109345	1	-0.0454525	1	-0.0808803	1	0.0746849	1	0.0822215	1	-0.05922	1	0.0135222	1	0.0592311	1	-0.111622	1	0.0211331	1	0.0152916	0.618339	FALSE	FALSE	0.038713	2.6416e-14	FALSE
Araf	0.145058	1	-0.0508001	1	-0.0271684	1	0.00575405	1	0.00329902	1	0.04685	1	-0.0188481	1	0.177073	1	-0.00678275	1	-0.0564142	1.19098e-15	0.0486672	1	-0.0266391	1	0.162242	1	0.053836	1	-0.0947873	1	0.0102898	1	0.23759	1	0.0898537	1	-0.0668557	1	-0.0126584	1	-0.111864	1	0.024176	0.00573673	FALSE	FALSE	-0.00110604	1.58307e-38	FALSE
Arcn1	-0.232992	1	-0.253171	1	0.0847816	1	-0.0524758	1	-0.266257	1	-0.0295489	1	-0.0136424	1	-0.146377	1	-0.0219801	1	-0.0547277	1.73664e-08	-0.113422	1	-0.146339	1	-0.242466	1	0.0510439	1	0.0378072	1	-0.029512	1	0.0132119	1	-0.191828	1	-0.0672609	1	-0.0603081	1	-0.31179	1	-0.0974882	0.741118	FALSE	FALSE	-0.106257	3.88812e-58	FALSE
Areg	-0.333787	1	0.0698137	1	0.698509	1	0.656949	1	0.348603	1	-0.128944	1	-0.193437	1	0.566412	1	-0.389575	1	0.308365	1	0.327742	1	-0.154935	1	0.0157938	1	0.388744	1	-0.0433986	1	0.609961	1	0.194303	1	-0.350071	1	-0.150215	1	0.0286016	1	0.142996	1	0.124401	1	FALSE	FALSE	0.195913	0.000107146	FALSE
Arf2	0.150654	1	0.156549	1	-0.123627	1	-0.000473867	1	0.0235972	1	0.0893404	1	-0.0264262	1	0.0757158	1	0.00350596	1	-0.0281744	2.6401e-11	-0.0568584	1	-0.0786165	1	-0.015844	1	-0.150077	1	0.000700108	1	0.0325152	1	0.0395647	1	-0.195099	1	0.063932	1	-0.00320912	1	-0.00303724	1	-0.00216038	0.220999	FALSE	FALSE	0.0256579	2.12342e-18	FALSE
Arf3	0.263785	1	0.0359636	1	0.249055	1	0.0577108	1	-0.0769724	1	0.0226275	1	0.0905928	1	0.137229	1	0.0570605	1	0.0690831	1	0.0188548	1	0.169548	1	0.0219737	1	0.0955887	1	0.132487	1	-0.148633	1	-0.00386348	1	0.101037	1	0.11802	1	-0.0885328	1	0.054505	1	0.0655771	1	FALSE	FALSE	0.120077	1	FALSE
Arf4	0.261722	1	-0.0867301	1	-0.0711268	1	0.0707452	1	0.107033	1	-0.127073	1	-0.104536	1	0.136225	1	-0.00052711	1	-0.0967917	1.31947e-09	-0.00259084	1	-0.0520028	1	-0.154246	1	-0.040906	1	-0.0841965	1	-0.0515843	1	0.0410244	1	-0.0446718	1	0.0536176	1	-0.192056	1	-0.233418	1	-0.0320043	0.519534	FALSE	FALSE	-0.122354	1.65828e-52	FALSE
Arf5	0.186632	1	0.0862383	1	0.0317686	1	-0.249728	1	0.296126	1	-0.0678436	1	-0.0427543	1	0.101142	1	-0.020219	1	-0.0240154	1	0.0415477	1	-0.0191287	1	0.0576807	1	-0.0958113	1	-0.105477	1	0.0545569	1	0.128116	1	-0.158685	1	-0.166271	1	-0.117565	1	0.0624289	1	-0.00101243	1	FALSE	FALSE	0.0219479	1	FALSE
Arf6	0.00594869	1	-0.0457287	1	-0.104417	1	-0.180201	1	-0.160028	1	-0.0452397	1	-0.0133241	1	-0.193594	1	-0.13838	1	0.00915886	1	-0.0258456	1	-0.0181873	1	-0.189665	1	-0.0458158	1	-0.105889	1	-0.154816	1	-0.0135936	1	-0.200279	1	-0.0456669	1	-0.210264	1	-0.233056	1	-0.100423	1	FALSE	FALSE	0.0184292	0.000674405	FALSE
Arfgap1	-0.0265034	1	-0.0685054	1	-0.143579	1	-0.00129785	1	-0.00757891	1	0.0426604	1	0.0500413	1	0.0531194	1	0.0843252	1	0.038324	0.107242	-0.00371068	1	-0.00929805	1	0.0123068	1	0.0276436	1	-0.042327	1	0.0509842	1	0.0695306	1	0.10118	1	0.071346	1	-0.0112291	1	0.142793	1	0.0204869	1	FALSE	FALSE	0.0324099	1.19152e-16	FALSE
Arfgap2	0.071922	1	-0.0812965	1	-0.0449584	1	0.143817	1	-0.205381	1	0.0271956	1	0.00373739	1	-0.0443762	1	-0.123914	1	-0.0600921	6.0551e-23	0.0543697	1	-0.0851158	1	0.0235198	1	-0.0126514	1	-0.0507768	1	0.204218	1	0.115663	1	0.0557859	1	0.105175	1	0.0561644	1	-0.0102576	1	0.00679748	6.04822e-07	FALSE	FALSE	-0.00479666	2.67799e-44	FALSE
Arfgap3	0.0493095	1	-0.0309571	1	-0.0147517	1	-0.147766	1	0.186434	1	0.0325178	1	0.0730255	1	0.241078	1	0.00376276	1	0.0469025	0.181839	0.0356344	1	-0.0207428	1	-0.048763	1	0.184538	1	0.0276234	1	0.119616	1	0.154702	1	-0.0198466	1	-0.128536	1	-0.0383324	1	0.0940928	1	0.0380733	1	FALSE	FALSE	0.102071	0.541684	FALSE
Arfgef1	-0.151066	1	0.0751151	1	-0.0350251	1	0.0164502	1	-0.120687	1	0.113101	1	-0.0259219	1	0.0809391	1	-0.133846	1	-0.0173666	8.00965e-08	0.053371	1	-0.0147399	1	-0.0473215	1	-0.0295275	1	0.0116159	1	-0.141621	1	-0.0332693	1	-0.0124485	1	0.104748	1	-0.0634976	1	-0.032924	1	-0.0192343	0.848352	FALSE	FALSE	0.00212645	1.77529e-32	FALSE
Arfip1	0.00449278	1	-0.206803	1	-0.147687	1	0.0606726	1	0.164391	1	0.000623484	1	-0.02243	1	0.165417	1	-0.0622701	1	-0.0260539	4.41798e-14	0.0781445	1	0.100757	1	-0.024925	1	0.0353153	1	0.0800583	1	0.0982214	1	-0.0509549	1	-0.215495	1	0.0160767	1	-0.0577189	1	-0.050236	1	-0.00287637	0.0263969	FALSE	FALSE	-0.02923	2.15881e-71	FALSE
Arfip2	0.0876722	1	0.0706672	1	0.0157111	1	-0.118012	1	-0.139482	1	-0.0753889	1	0.046061	1	0.226785	1	-0.0875839	1	0.0140114	4.20125e-09	0.0415292	1	-0.0559467	1	0.273255	1	-0.0342809	1	-0.0807907	1	0.0162321	1	-0.0986084	1	0.0706353	1	0.0385936	1	-0.0815161	1	1.10252e-05	1	0.00616929	0.622083	FALSE	FALSE	-0.0130704	6.23377e-56	FALSE
Arfrp1	-0.021579	1	-0.22157	1	0.159087	1	0.0864784	1	-0.100606	1	0.0253632	1	-0.0615973	1	-0.0938986	1	0.105486	1	0.0325218	0.29672	0.0275982	1	0.0258443	1	0.127852	1	0.00292237	1	0.0574823	1	-0.104327	1	-0.0629397	1	-0.0120033	1	-0.174518	1	-0.00180866	1	0.0560201	1	-0.00705676	1	FALSE	FALSE	0.0650248	7.87781e-09	FALSE
Arglu1	-0.232832	1	0.120995	1	-0.17578	1	-0.0179209	1	-0.169293	1	-0.00669041	1	-0.102167	1	-0.22958	1	0.0112509	1	-0.121617	8.91532e-07	-0.0103913	1	-0.0765475	1	0.012763	1	-0.0515783	1	-0.0889026	1	0.0920369	1	0.0445687	1	-0.1466	1	-0.173376	1	0.0528697	1	-0.0679703	1	-0.0636553	0.954054	FALSE	FALSE	-0.0603381	4.22539e-17	FALSE
Arhgap1	-0.0415038	1	0.0275278	1	-0.086227	1	-0.16949	1	0.0394781	1	-0.0566131	1	0.0699322	1	-0.0423993	1	0.0855435	1	0.00140116	1.65061e-09	-0.0473291	1	0.0835951	1	0.0345048	1	0.0485989	1	-0.102746	1	-0.0128779	1	-0.0604363	1	0.103657	1	0.0163877	1	0.0662545	1	-0.0406689	1	-0.00397192	0.539368	FALSE	FALSE	0.0436146	6.85789e-19	FALSE
Arhgap10	-0.159223	1	-0.0421122	1	0.0248542	1	0.259404	1	0.0836799	1	0.155634	1	-0.141886	1	-0.0456541	1	0.171248	1	0.0453057	1	0.0170586	1	-0.0871704	1	0.0958068	1	0.116781	1	0.275225	1	0.206536	1	0.225181	1	-0.24072	1	0.100893	1	-0.0571663	1	-0.0908555	1	0.0434677	1	FALSE	FALSE	-0.0736782	9.62226e-32	FALSE
Arhgap11a	-0.131429	1	0.020234	1	0.0837259	1	0.11673	1	0.0799517	1	-0.0111019	1	0.163184	1	0.0013379	1	-0.0200562	1	0.015753	0.402518	0.0224879	1	-0.0419068	1	0.218999	1	0.0289776	1	0.00113415	1	-0.156577	1	0.231547	1	-0.0446361	1	0.0340609	1	-0.111392	1	-0.0363999	1	0.0221249	1	FALSE	FALSE	0.0352628	4.92909e-09	FALSE
Arhgap12	0.0292381	1	0.0404748	1	0.0145829	1	-0.110415	1	-0.0368679	1	0.00623206	1	-0.003755	1	0.0945889	1	-0.0729836	1	-0.023878	8.44128e-14	-0.0223406	1	0.0359832	1	0.0119817	1	-0.0175765	1	-0.110194	1	0.067299	1	-0.000976284	1	0.13529	1	0.18875	1	-0.0758049	1	0.0848342	1	0.0111649	0.033926	FALSE	FALSE	0.0231284	7.78357e-21	FALSE
Arhgap17	0.181872	1	-0.044482	1	-0.0481906	1	0.085347	1	0.0586226	1	-0.0220912	1	0.00536498	1	0.0344946	1	0.0314403	1	-0.0539896	3.80729e-26	-0.0407569	1	0.04167	1	-0.124772	1	0.0695284	1	-0.0359094	1	0.242171	1	0.138275	1	0.0792186	1	-0.00974022	1	0.0850106	1	-0.253613	0.0693918	0.0199748	8.66325e-10	FALSE	FALSE	-0.0125435	1.2472e-53	FALSE
Arhgap18	0.0773481	1	0.0538326	1	0.00829568	1	-0.0245597	1	0.257952	1	-0.100306	1	0.15031	1	-0.0155929	1	-0.00782023	1	0.0419605	1	0.0372473	1	0.243199	1	0.0374921	1	0.0414164	1	-0.0266304	1	-0.0166417	1	0.0481384	1	-0.0447521	1	-0.0542571	1	0.186628	1	-0.144147	1	0.035672	1	FALSE	FALSE	0.0359648	3.20304e-14	FALSE
Arhgap21	0.0175688	1	-0.0266588	1	0.191773	1	-0.00402721	1	0.0929946	1	0.152478	1	-0.0286618	1	-0.093698	1	0.0571338	1	-0.0211982	8.74259e-14	0.0670746	1	0.0152043	1	0.160145	1	0.0980918	1	-0.00342888	1	-0.217281	1	0.23258	1	0.0695165	1	-0.0420422	1	0.106416	1	0.0333246	1	0.040824	0.0343831	FALSE	FALSE	0.0682609	1.76851e-09	FALSE
Arhgap22	-0.13185	1	0.33827	1	-0.112439	1	0.0784723	1	0.0144216	1	-0.039386	1	-0.00783501	1	-0.085356	1	0.0654027	1	-0.00734632	4.77871e-10	0.0200365	1	0.0328502	1	-0.0990494	1	-0.114924	0.163029	-0.0660967	1	0.0451395	1	-0.0936145	1	-0.109105	1	0.04922	1	-0.0873236	1	0.0189367	1	-0.0138845	0.290521	FALSE	FALSE	-0.0207689	7.6479e-58	FALSE
Arhgap23	-0.102418	1	0.131255	1	0.364893	1	-0.091097	1	0.0287772	1	0.0687275	1	-0.00867452	1	-0.270513	1	0.00148304	1	-0.171306	9.94489e-15	-0.0839916	1	0.23414	1	0.070584	1	0.0603393	1	0.103207	1	-0.11778	1	0.0934999	1	-0.170053	1	-0.0853607	1	-0.293139	1	-0.13137	1	-0.0175617	0.0144159	FALSE	FALSE	0.106871	1	FALSE
Arhgap35	-0.0785046	1	-0.0346056	1	0.116127	1	-0.0618816	1	0.222904	1	0.00813496	1	-0.13425	0.393726	0.0182142	1	0.000377428	1	-0.0190943	9.87559e-12	0.0295	1	0.169896	1	-0.0942803	1	0.0105227	1	0.144376	1	-0.0722775	1	0.113979	1	0.0556721	1	0.0210362	1	0.0812933	1	0.163088	1	0.0314395	0.127599	FALSE	FALSE	0.010021	8.0453e-31	FALSE
Arhgap42	-0.215387	1	-0.35024	1	0.13976	1	-0.0524367	1	0.10535	1	0.0534256	1	-0.186393	1	0.297944	1	0.0176061	1	-0.0121752	1	-0.14962	1	-0.116502	1	0.0275155	1	0.118756	1	0.0263141	1	0.181421	1	0.381841	1	-0.0509018	1	0.108038	1	-0.199091	1	-0.0601691	1	0.00309789	1	FALSE	FALSE	-0.113501	3.30394e-43	FALSE
Arhgap5	-0.182366	1	0.0905531	1	-0.212458	1	0.066931	1	-0.0429474	1	-0.146309	1	-0.206762	1	-0.237089	1	0.1064	1	-0.130403	6.31617e-20	-0.0834199	1	-0.124809	1	-0.209031	1	-0.178788	1	-0.0642627	1	-0.35264	1	0.085811	1	-0.124362	1	-0.0623899	1	0.0160187	1	0.00690462	1	-0.0945438	3.74227e-05	FALSE	FALSE	-0.120335	1.54892e-66	FALSE
Arhgef1	0.124934	1	0.0497365	1	-0.262107	0.194894	-0.0602108	1	-0.0993695	1	-0.0601453	1	0.046264	1	-0.179588	1	0.110383	1	-0.0149164	8.9481e-10	0.048229	1	0.100193	1	0.12204	1	0.0324096	1	0.0685439	1	0.0648672	1	-0.074147	1	0.194361	1	0.100433	1	0.0278697	1	-0.017031	1	0.015369	0.349773	FALSE	FALSE	0.0282584	2.3597e-23	FALSE
Arhgef10l	-0.153559	1	0.0955192	1	-0.0367272	1	-0.0686745	1	-0.0265287	1	-0.0648669	1	-0.074079	1	-0.0244229	1	0.00275061	1	0.00092956	0.0013951	-0.0860337	1	0.000312281	1	0.175522	1	-0.0146327	1	0.0118035	1	0.0616503	1	-0.0620783	1	-0.0840603	1	0.0234317	1	-0.0392996	1	-0.0416069	1	-0.0192691	0.999994	FALSE	FALSE	-0.0214936	2.00752e-48	FALSE
Arhgef12	-0.0306698	1	0.0149843	1	-0.063926	1	-0.111125	1	-0.00125923	1	0.157526	1	-0.0434725	1	-0.0177996	1	-0.247118	1	-0.07685	1.53378e-19	0.0478443	1	-0.172693	1	-0.0615602	1	0.0628813	1	-0.0641148	1	0.125485	1	0.0935266	1	-0.0293172	1	-0.0915563	1	-0.15918	1	0.106302	1	-0.0267663	6.14989e-05	FALSE	FALSE	-0.0718223	5.63672e-71	FALSE
Arhgef18	-0.0798265	1	0.343533	1	0.09831	1	-0.106256	1	0.193084	1	0.0938465	1	-0.0200815	1	-0.0700217	1	-0.0522571	1	-0.0211636	2.04407e-10	-0.00959156	1	0.0193297	1	-0.0741037	1	0.0299245	1	-0.0410471	1	-0.0587758	1	0.025457	1	0.067847	1	0.0300722	1	-0.166255	1	-0.0230983	1	0.00852028	0.36213	FALSE	FALSE	-0.00848437	1.45502e-41	FALSE
Arhgef2	-0.171445	1	0.427189	1	-0.258048	1	-0.101323	1	0.135525	1	0.0929613	1	0.0150698	1	-0.233843	1	-0.0430545	1	-0.0778293	1.15125e-11	-0.0793048	1	-0.11314	1	-0.148305	1	0.0443402	1	0.133702	1	-0.143122	1	0.0537467	1	0.0039922	1	-0.0816554	1	0.116576	1	-0.194165	1	-0.0296254	0.175935	FALSE	FALSE	-0.0273168	1.08646e-29	FALSE
Arhgef40	-0.0232921	1	-0.177231	1	0.0162451	1	0.0933236	1	-0.0457825	1	0.00645148	1	-0.017511	1	-0.157761	1	-0.070151	1	-0.0478036	1.15236e-16	0.00361716	1	-0.0533428	1	-0.17591	1	-0.0347355	1	-0.123314	1	0.0457547	1	-0.120369	1	0.164627	1	-0.00332851	1	-0.103242	1	-0.0154192	1	-0.0399607	0.00193114	FALSE	FALSE	-0.0319502	3.03692e-60	FALSE
Arhgef5	0.066375	1	0.122467	1	-0.368184	1	0.0487315	1	0.114347	1	0.267191	1	-0.0233995	1	0.0535185	1	0.198724	1	-0.0323654	9.5515e-13	-0.0031569	1	-0.136347	1	-0.0622526	1	0.0232083	1	0.265876	1	-0.263817	1	0.145397	1	0.165535	1	-0.0331184	1	0.0190471	1	0.155381	1	0.0344362	0.0811767	FALSE	FALSE	-0.0053055	3.12948e-35	FALSE
Arhgef7	-0.117765	1	-0.0493102	1	-0.170058	1	0.00631646	1	-0.122341	1	-0.00406547	1	0.0755687	1	-0.0211896	1	0.0690217	1	-0.0126045	3.49369e-10	-0.00320325	1	0.00908893	1	0.129128	1	0.0768739	1	0.0151369	1	0.0945431	1	0.266807	1	-0.0606419	1	-0.0400848	1	0.213449	1	-0.0199199	1	0.0159405	0.405297	FALSE	FALSE	0.00967968	7.68947e-30	FALSE
Arid1a	0.163855	1	-0.200984	1	-0.0485912	1	0.133336	1	-0.0420111	1	0.176878	1	0.0471666	1	-0.165919	1	0.0810041	1	-0.045531	3.57065e-14	-0.0151293	1	0.0361624	1	0.235011	1	0.0953905	1	0.174237	1	-0.119547	1	0.217899	1	-0.222193	1	-0.0900776	1	-0.149188	1	0.0385157	1	0.0142992	0.0242675	FALSE	FALSE	-0.0270859	2.33575e-52	FALSE
Arid1b	-0.00255931	1	0.154402	1	0.0168273	1	-0.138996	1	-0.0642316	1	-0.0157129	1	-0.0194863	1	-0.0193857	1	-0.0162793	1	-0.0369829	9.83302e-15	0.0443715	1	-0.0320884	1	-0.0606646	1	-0.030532	1	-0.039614	1	-0.00916904	1	-0.190884	1	-0.119559	1	0.0953496	1	-0.145586	1	-0.126367	1	-0.0360547	0.0143479	FALSE	FALSE	-0.0487329	1.32792e-77	FALSE
Arid2	0.0834615	1	-0.00531756	1	-0.0261415	1	0.0189307	1	-0.0892114	1	0.0237388	1	-0.00370397	1	0.0525749	1	0.0534526	1	-0.00368222	5.9056e-08	0.038511	1	0.181919	1	-0.0324429	1	0.0788461	1	-0.000421204	1	0.122214	1	-0.0364161	1	-0.061434	1	0.0650264	1	-0.0460636	1	0.0258916	1	0.0209397	0.829259	FALSE	FALSE	0.0343862	3.78649e-23	FALSE
Arid4a	0.196521	1	0.147589	1	-0.240914	1	0.05944	1	0.128334	1	-0.00257424	1	0.0372493	1	0.0627141	1	0.00673224	1	0.00882941	1.39146e-05	0.0326639	1	-0.00351052	1	0.0847131	1	0.172402	1	0.212242	1	0.0798453	1	0.287286	1	0.374552	1	0.199768	1	-0.0555673	1	0.111164	1	0.0904514	0.99442	FALSE	FALSE	0.0779571	2.73513e-06	FALSE
Arid4b	0.477777	1	-0.069798	1	0.158494	1	-0.1058	1	-0.251408	1	0.0166442	1	-0.0253045	1	0.0112016	1	0.0870821	1	0.022822	1	0.0937051	1	0.0637636	1	-0.107338	1	0.0203792	1	-0.262799	1	-0.281664	1	0.205681	1	-0.0768451	1	0.246654	1	-0.0151374	1	0.0222027	1	0.0109672	1	FALSE	FALSE	0.178721	0.0288477	FALSE
Arid5a	0.0688576	1	-0.2207	1	0.137866	1	0.127761	1	0.124683	1	-0.0833023	1	-0.0820678	1	0.00756129	1	-0.0579424	1	-0.0279349	5.98441e-10	-0.0941951	1	0.050679	1	0.0289554	1	-0.0233968	1	-0.00874427	1	-0.0880173	1	-0.0988113	1	-0.139922	1	-0.129065	1	-0.0770581	1	-0.250797	1	-0.03979	0.450574	FALSE	FALSE	-0.0728474	6.16619e-80	FALSE
Arid5b	0.456723	1	0.201321	1	-0.164394	1	0.316315	1	0.0792085	1	0.371663	1	0.379276	1	0.495327	1	0.175886	1	0.181156	1	0.4065	1	-0.0793243	1	-0.0543682	1	0.329584	1	0.193745	1	0.0934198	1	0.132818	1	0.299862	1	0.00683744	1	0.277131	1	0.21006	1	0.205178	1	FALSE	FALSE	0.259626	6.21237e-13	FALSE
Arih1	-0.0301457	1	0.0252075	1	-0.193376	1	-0.0401881	1	0.0312978	1	0.054923	1	-0.0193718	1	0.0622663	1	-0.0990304	1	-0.0730369	1.88047e-18	-0.069418	1	0.0149138	1	0.0125602	1	0.0216578	1	0.0194677	1	0.0297657	1	-0.0523191	1	0.127863	1	0.0696367	1	-0.249105	1	-0.0615257	1	-0.0199027	0.000239939	FALSE	FALSE	-0.041899	2.97673e-54	FALSE
Arih2	-0.0188345	1	-0.0059769	1	-0.0554065	1	0.248294	1	-0.25058	1	0.109222	1	0.00570037	1	0.0774137	1	-0.124288	1	0.00839589	9.40196e-07	0.0653688	1	0.0504266	1	-0.000669898	1	0.0494801	1	-0.0978169	1	-0.117929	1	0.180131	1	-0.0661446	1	0.157682	1	0.0830151	1	-0.044786	1	0.0120332	0.955512	FALSE	FALSE	0.0124032	1.54323e-32	FALSE
Arl1	0.0715737	1	-0.155577	1	-0.210982	1	-0.476052	1	-0.0426901	1	-0.120237	1	-0.143871	1	0.139483	1	0.123271	1	-0.078615	5.79112e-07	0.0879731	1	-0.232465	1	-0.233298	1	-0.0514237	1	-0.353784	1	0.109011	1	-0.104905	1	-0.237816	1	0.0662673	1	0.0163304	1	-0.0994689	1	-0.091775	0.940927	FALSE	FALSE	-0.131639	1.63524e-56	FALSE
Arl13b	0.282878	1	-0.069007	1	-0.0164873	1	0.0415994	1	0.0976632	1	0.0479214	1	0.0919147	1	-0.00147662	1	-0.0441387	1	0.0419096	0.001633	0.0199756	1	-0.0347427	1	-0.144535	1	-0.030182	1	-0.00945432	1	-0.128763	1	0.237972	1	0.0858617	1	0.122435	1	0.0156827	1	-0.0874122	1	0.0247436	0.999996	FALSE	FALSE	0.0273902	3.14955e-27	FALSE
Arl14ep	-0.000326031	1	0.0256888	1	0.0513018	1	0.245641	1	0.0350227	1	-0.0125598	1	-0.00343983	1	0.138992	1	0.0381812	1	0.00521431	1.61904e-07	0.0276341	1	0.0889251	1	0.0927612	1	0.0424555	1	0.0293143	1	0.0570557	1	0.0107425	1	0.182327	1	0.0448158	1	-0.192932	1	-0.0524943	1	0.0406819	0.887577	FALSE	FALSE	0.0372893	8.8233e-25	FALSE
Arl16	-0.100202	1	-0.243256	1	0.183599	1	0.105174	1	-0.0290181	1	0.065742	1	-0.0171254	1	-0.160642	1	0.152534	1	0.0320449	0.00227685	0.039709	1	-0.11119	1	0.0539228	1	0.000928598	1	0.0239239	1	0.0787421	1	0.0820668	1	0.0875575	1	-0.0588053	1	-0.0401396	1	0.0449909	1	0.0090741	0.999998	FALSE	FALSE	-0.0241819	2.05102e-62	FALSE
Arl2	0.134192	1	0.107768	1	0.281845	1	0.23578	1	0.380565	1	0.10818	1	0.000736259	1	-0.24534	1	0.0739924	1	0.0802672	1	0.147253	1	0.0987515	1	0.0124411	1	0.244818	1	0.170619	1	-0.234924	1	0.00206765	1	0.0224789	1	-4.39111e-05	1	-0.165667	1	0.12614	1	0.0753295	1	FALSE	FALSE	0.141247	1	FALSE
Arl2bp	0.0947359	1	-0.254168	1	0.196927	1	-0.0956886	1	0.322695	1	0.0376348	1	-0.0708365	1	-0.206458	1	-0.0521002	1	0.0419614	0.4253	-0.0722609	1	-0.143463	1	0.024668	1	0.050892	1	0.10661	1	-0.0270331	1	0.034894	1	-0.10863	1	-0.0936163	1	0.107411	1	-0.0325446	1	-0.00658908	1	FALSE	FALSE	-0.0669539	4.1176e-58	FALSE
Arl3	-0.048055	1	-0.296046	1	0.0258685	1	-0.216043	1	-0.32903	1	-0.208937	1	-0.117518	1	0.129976	1	0.255046	1	-0.0564321	0.00185355	-0.0780986	1	0.0556901	1	0.0428469	1	0.00793675	1	0.0908627	1	-0.342543	1	0.176205	1	0.0512827	1	0.0388933	1	-0.175598	1	-0.0255491	1	-0.0485353	0.999997	FALSE	FALSE	-0.0836659	6.74943e-33	FALSE
Arl4a	-0.121304	1	-0.0686058	1	0.117596	1	0.0236387	1	-0.191201	1	-0.103148	0.138283	0.0729267	1	-0.260155	1	0.0702891	1	-0.0271523	1.90146e-09	-0.0591762	1	0.0356395	1	-0.214948	1	-0.0177291	1	-0.188348	1	-0.0659496	1	-0.0812166	1	0.197646	1	0.0115677	1	-0.186649	1	-0.0412409	1	-0.0522629	0.382142	FALSE	FALSE	-0.0854771	6.03912e-89	FALSE
Arl4c	-0.0055728	1	-0.101461	1	0.0661756	1	-0.26388	1	-0.399161	1	-0.222327	1	0.0575134	1	-0.275933	1	-0.274006	1	-0.132036	7.50078e-10	-0.0934243	1	-0.408627	1	-0.0601571	1	-0.371726	1	0.228129	1	0.0177272	1	-0.15771	1	0.138247	1	-0.476401	1	-0.420333	1	-0.358776	1	-0.167321	0.470034	FALSE	FALSE	-0.0895799	3.25839e-33	FALSE
Arl5a	-0.0410588	1	0.0585639	1	0.0757602	1	0.0111987	1	0.242402	1	0.112383	1	0.0514291	1	0.176252	1	0.0772033	1	-0.0106659	8.35956e-06	0.048165	1	-0.0953649	1	-0.0309066	1	-0.0709729	1	0.410285	1	-0.116679	1	-0.0993606	1	-0.0652503	1	0.161233	1	0.00261711	1	-0.0924799	1	0.0383216	0.991092	FALSE	FALSE	0.0427933	1.5322e-15	FALSE
Arl5b	0.0749398	1	-0.0434758	1	-0.049746	1	0.104938	1	0.0228937	1	0.00838727	1	0.0299094	1	0.0707718	1	-0.0314262	1	-0.00639802	2.95077e-12	0.0374874	1	-0.0119218	1	0.0865932	1	0.00280136	1	0.0608465	1	-0.37939	1	0.0632411	1	0.00108702	1	0.0533362	1	0.0972416	1	0.0802775	1	0.0129711	0.117123	FALSE	FALSE	0.0407426	3.33011e-19	FALSE
Arl6ip1	0.0061848	1	-0.421867	1	-0.0463931	1	0.58153	1	-0.109566	1	0.170556	1	-0.0225793	1	-0.060918	1	0.092095	1	-0.0387703	0.54807	-0.0650655	1	-0.339846	1	0.118965	1	-0.298956	1	0.0215334	1	-0.472706	1	0.2719	1	0.124536	1	0.0373113	1	-0.443898	1	-0.116564	1	-0.048215	1	FALSE	FALSE	-0.0298337	2.27247e-14	FALSE
Arl6ip4	-0.116105	1	0.0692906	1	-0.064868	1	-0.254592	1	0.142791	1	0.0329715	1	0.0220991	1	-0.187411	1	-0.04701	1	0.0340799	1	-0.0331708	1	-0.00865324	1	0.258331	1	0.0655247	1	-0.0490677	1	-0.413691	1	0.169362	1	-0.00441891	1	-0.0856395	1	0.340409	1	0.189727	1	0.00285513	1	FALSE	FALSE	0.00655034	9.68972e-20	FALSE
Arl6ip5	0.0730456	1	0.285606	1	0.0232577	1	0.115868	1	-0.151105	1	0.158068	1	0.016605	1	0.0665973	1	0.103825	1	0.0729982	1	0.0640359	1	0.00989232	1	0.0546727	1	0.0628326	1	0.0917253	1	0.167156	1	0.0277808	1	0.0527183	1	-0.0399412	1	-0.119977	1	0.232921	1	0.0651706	1	FALSE	FALSE	0.0669149	1	FALSE
Arl6ip6	0.0724968	1	0.116364	1	0.058748	1	0.0277519	1	-0.190203	1	0.00207065	1	-0.113181	1	-0.119972	1	-0.210726	1	-0.0490402	9.85007e-16	-0.0287962	1	-0.0440611	1	0.0168822	1	0.0758369	1	-0.0806809	1	0.0872032	1	0.0884723	1	-0.131474	1	-0.112469	1	-0.00993972	1	0.0590852	1	-0.0231253	0.00526558	FALSE	FALSE	0.0354157	1.6567e-20	FALSE
Arl8a	-0.0314022	1	-0.112938	1	-0.0540186	1	-0.243291	1	-0.0139161	1	-0.11203	1	-0.0371833	1	0.126691	1	0.16612	1	-0.0461615	1.13203e-13	-0.000384912	1	0.0836046	1	-0.307619	1	0.0201475	1	-0.20167	1	-0.445721	1	-0.0801736	1	0.113345	1	0.0604447	1	-0.289145	1	-0.0465217	1	-0.0691345	0.0379207	FALSE	FALSE	-0.00562029	5.28099e-40	FALSE
Arl8b	0.00881268	1	-0.328101	1	-0.123189	1	0.10199	1	0.0854851	1	0.112349	1	-0.206806	0.0243382	0.0111779	1	-0.0204195	1	-0.0593769	3.56341e-19	-0.0906458	1	0.0217299	1	-0.171799	1	0.028135	1	-0.0648122	1	-0.101209	1	0.00851469	1	-0.10106	1	-0.0568872	1	-0.0876731	1	-0.00731685	1	-0.0495762	1.19951e-05	FALSE	FALSE	-0.0176987	3.1053e-46	FALSE
Armc1	-0.0714054	1	-0.0529714	1	-0.00909333	1	0.163908	1	0.0935535	1	-0.0628748	1	-0.403351	5.49913e-05	-0.257928	1	0.0934143	1	-0.088039	3.68558e-09	-0.151328	1	-0.0961377	1	0.0325625	1	-0.171591	1	-0.0394138	1	-0.309151	1	-0.0928841	1	-0.0624199	1	-0.146931	1	-0.0779839	1	-0.218003	1	-0.0918128	0.0470784	FALSE	FALSE	-0.122687	2.46405e-62	FALSE
Armc10	-0.0299604	1	0.0940119	1	-0.00572201	1	0.157093	1	-0.155324	1	0.00890186	1	-0.0126146	1	0.0754891	1	-0.0744779	1	-0.0243117	6.84222e-13	-0.0129097	1	0.0319273	1	-0.155171	1	0.0675716	1	-0.0784861	1	-0.0127243	1	-0.147392	1	0.0959725	1	0.0284639	1	0.0854718	1	-0.0166801	1	-0.00385097	0.0724798	FALSE	FALSE	-0.00502391	7.97655e-43	FALSE
Armcx5	-0.0419243	1	-0.0527612	1	-0.0377645	1	-0.0884771	1	0.177849	1	-0.0240639	1	-0.0423483	1	0.148996	1	0.0159417	1	-0.0032742	1.18388e-06	0.111777	1	0.0372521	1	0.0174686	1	0.007756	1	0.116725	1	0.12757	1	-0.25387	1	0.15038	1	0.0122774	1	-0.167053	1	0.00243552	1	0.010233	0.961447	FALSE	FALSE	0.0112778	4.46823e-23	FALSE
Arnt	0.0121555	1	0.0984479	1	0.0875491	1	-0.0897992	1	-0.0525073	1	0.062344	1	0.0201812	1	0.00847534	1	0.0723783	1	0.00619502	1.59874e-07	-0.013669	1	0.0229178	1	-0.159723	1	-0.05269	1	0.0134643	1	-0.204244	1	-0.075506	1	0.208531	1	0.233447	1	-0.0317943	1	-0.10149	1	0.00307928	0.886936	FALSE	FALSE	0.0139082	1.2008e-38	FALSE
Arntl	0.092408	1	-0.0498389	1	-0.073842	1	0.20075	1	0.0154982	1	-0.0479598	1	-0.0657531	1	0.0905168	1	-0.0723173	1	-0.0299626	1.55795e-14	-0.0152508	1	-0.0422821	1	-0.0540458	1	0.0210614	1	0.000772435	1	-0.158833	1	-0.0635347	1	0.0578427	1	-0.0915999	1	-0.152667	1	-0.221955	0.0808911	-0.0314758	0.0058844	FALSE	FALSE	-0.0325459	1.23245e-58	FALSE
Arpc1a	0.219901	1	-0.37925	1	-0.0291381	1	-0.164812	1	-0.0950721	1	-0.334464	2.81772e-05	-0.0687834	1	-0.0593062	1	-0.183947	1	-0.0254978	0.00679298	0.0100493	1	-0.170275	1	0.0385323	1	-0.165326	1	0.0596586	1	-0.396057	1	0.0474657	1	-0.225304	1	-0.162183	1	-0.182453	1	-0.0617645	1	-0.110858	0.895881	FALSE	FALSE	-0.117374	2.15845e-58	FALSE
Arpc1b	0.347213	1	-0.247916	1	0.0215388	1	-0.244445	1	-0.371926	1	-0.628961	6.43783e-14	-0.105498	1	0.00257486	1	-0.321346	1	0.0158781	1	-0.0658612	1	-0.177931	1	-0.0509468	1	-0.0699502	1	0.0190563	1	0.0550236	1	0.137545	1	-0.17612	1	-0.164194	1	-0.00502655	1	-0.173789	1	-0.105004	0.0305712	FALSE	FALSE	-0.0434937	0.000400334	FALSE
Arpc2	0.0782842	1	0.104566	1	0.0964567	1	-0.0311344	1	0.22278	1	0.0713667	1	0.0616016	1	0.128717	1	0.036386	1	0.0453029	1	0.133068	1	-0.126389	1	0.0991243	1	-0.00571531	1	0.0344086	1	0.104936	1	0.169615	1	0.092644	1	0.0147905	1	-0.0644639	1	0.0411197	1	0.0622602	1	FALSE	FALSE	-0.0289526	3.98818e-05	FALSE
Arpc3	0.334821	1	0.0269227	1	0.0191061	1	-0.13986	1	-0.153645	1	-0.114642	1	-0.0302026	1	0.070111	1	0.0278572	1	-0.0104682	1	0.0789897	1	0.0793606	1	0.0437126	1	-0.133321	1	-0.0192289	1	0.0689248	1	0.00257115	1	-0.126174	1	-0.219955	1	-0.0737969	1	0.0252337	1	-0.011604	1	FALSE	FALSE	0.0100865	1	FALSE
Arpc4	0.0477503	1	0.0563933	1	0.160116	1	-0.131362	1	0.300367	1	0.0273912	1	0.0385063	1	0.0464172	1	-0.0351681	1	0.0485657	1	-0.100279	1	-0.116222	1	-0.017658	1	-0.0584773	1	0.0396695	1	-0.298109	1	0.0217544	1	0.0582061	1	0.0959324	1	-0.143652	1	-0.00661379	1	0.00159656	1	FALSE	FALSE	-0.0240651	1.38091e-15	FALSE
Arpc5	0.189661	1	0.0836853	1	0.229089	1	-0.00571008	1	0.162053	1	0.188423	1	0.0510822	1	0.342491	1	0.18654	1	0.0241481	1	0.135504	1	0.10659	1	0.0346555	1	0.193661	1	0.10154	1	0.118095	1	0.0231635	1	0.307737	1	0.118926	1	-0.177642	1	0.110657	1	0.120207	1	FALSE	FALSE	-0.033759	3.37432e-08	FALSE
Arpc5l	-0.0836221	1	0.296419	1	-0.248669	1	-0.136715	1	0.034261	1	0.0205938	1	-0.132379	1	0.163634	1	0.0642111	1	0.027509	1	0.0714832	1	-0.00660901	1	0.193827	1	0.181351	1	-0.0163474	1	0.366138	1	0.0419228	1	-0.0913262	1	-0.105387	1	0.212683	1	0.032527	1	0.0421669	1	FALSE	FALSE	0.0632253	1	FALSE
Arpin	-0.0976669	1	-0.0306955	1	-0.0892523	1	-0.030852	1	0.135555	1	-0.042724	1	0.0385766	1	-0.0854692	1	-0.087121	1	-0.00564639	2.80175e-07	0.0193981	1	-0.0866871	1	0.0819564	1	-0.0542837	1	0.103661	1	0.144529	1	-0.124109	1	-0.0894906	1	-0.0760432	1	-0.00820263	1	-0.0395459	1	-0.0201959	0.913302	FALSE	FALSE	0.00116908	1.16848e-31	FALSE
Arpp19	-0.194834	1	-0.112228	1	-0.0802099	1	0.101972	1	0.0718649	1	0.0139154	1	-0.112704	1	0.0504939	1	0.0262107	1	0.0144231	1	0.0899771	1	-0.151485	1	-0.130189	1	0.000893985	1	0.0496715	1	-0.0784065	1	0.0952033	1	0.0730439	1	-0.0964529	1	-0.0944621	1	-0.187014	1	-0.0309674	1	FALSE	FALSE	0.0109633	1	FALSE
Arrb2	-0.0308388	1	0.159823	1	-0.109029	1	-0.015408	1	-0.0452833	1	0.109766	1	0.00100091	1	0.266932	1	0.0379115	1	0.036803	1	0.09302	1	-0.0115296	1	0.062108	1	0.0995131	1	-0.129811	1	0.130087	1	-0.121411	1	-0.0291539	1	0.15749	1	-0.158697	1	0.0374041	1	0.0257475	1	FALSE	FALSE	0.0288713	5.15513e-17	FALSE
Arsb	0.0400307	1	0.0129765	1	-0.0596328	1	0.229192	1	0.186496	1	0.0664672	1	0.00253217	1	-0.0504885	1	0.109414	1	0.003079	0.0058404	-0.0686906	1	0.10714	1	-0.0512056	1	0.0855961	1	0.00792322	1	0.0441705	1	0.192582	1	0.0676362	1	-0.0548992	1	0.0460757	1	-0.0048821	1	0.0434054	1	FALSE	FALSE	0.0376445	7.57151e-09	FALSE
Asap2	-0.00407116	1	-0.154724	1	-0.0813831	1	0.117784	1	0.436619	1	-0.113948	1	0.0509388	1	-0.206176	1	0.0913116	1	-0.0412389	3.67556e-05	0.0411153	1	-0.0723159	1	0.146491	1	0.141314	1	-0.216847	1	-0.287123	1	0.0427576	1	0.00810435	1	-0.0369604	1	-0.127385	1	-0.0170409	1	-0.0134656	0.997974	FALSE	FALSE	-0.0904993	5.9875e-37	FALSE
Asb3	0.0756642	1	-0.10815	1	0.101628	1	0.0253105	1	-0.0622838	1	-0.00155917	1	-0.0399514	1	-0.0540976	1	0.183376	1	3.4742e-05	1.78276e-06	0.0796154	1	-0.0457414	1	-0.0861266	1	-0.0174341	1	0.0326334	1	0.0777674	1	-0.04477	1	0.258605	1	0.0553272	1	-0.0487972	1	0.135539	1	0.0245995	0.970523	FALSE	FALSE	0.0382256	5.78086e-12	FALSE
Asb6	0.0400474	1	-0.0331552	1	-0.0888026	1	-0.112349	1	-0.0263403	1	0.0655519	1	0.0205238	1	-0.0633473	1	-0.0613138	1	0.0104754	4.28627e-07	0.0371036	1	-0.0839348	1	0.0756895	1	0.0643611	1	-0.0058024	1	0.016255	1	0.129732	1	0.0456873	1	-0.0157005	1	-0.183794	1	0.013179	1	-0.00742544	0.930347	FALSE	FALSE	0.0259472	1.18257e-22	FALSE
Asb8	0.141884	1	-0.0312194	1	-0.148465	1	-0.113443	1	-0.0888625	1	0.0303235	1	-0.0142727	1	0.143134	1	-0.0210328	1	0.00605943	1.12835e-05	0.0700433	1	0.0357125	1	-0.0299072	1	0.0461769	1	-0.0177073	1	0.000488934	1	-0.00399614	1	0.0879696	1	-0.020468	1	0.0351769	1	0.0310253	1	0.00660101	0.993203	FALSE	FALSE	0.0392885	7.30106e-10	FALSE
Ascc1	0.232452	1	0.1902	1	0.052326	1	0.0961125	1	-0.24531	1	-0.0298256	1	0.119729	1	0.279647	1	0.0456391	1	0.0249264	3.87954e-05	0.112334	1	-0.0375985	1	0.0571905	1	0.0669983	1	-0.0451672	1	0.0974843	1	-0.0238439	1	0.0555463	1	-0.084384	1	-0.0589967	1	0.0020079	1	0.0432127	0.998094	FALSE	FALSE	0.0235022	9.67266e-33	FALSE
Ascc2	-0.100395	1	-0.0231347	1	0.126633	1	0.0400218	1	0.222263	1	0.144358	1	0.0848484	1	0.00904366	1	0.0933003	1	0.0270686	0.0171354	-0.0294866	1	0.0434943	1	0.0145164	1	0.0987694	1	0.170531	1	-0.00315798	1	0.0649635	1	-0.143466	1	-0.0273396	1	0.232081	1	0.0497629	1	0.0521274	1	FALSE	FALSE	0.00396901	6.48149e-40	FALSE
Ascc3	0.30921	1	-0.126054	1	-0.0907836	1	-0.106756	1	-0.102496	1	0.132866	1	-0.198022	0.0286147	0.11766	1	-0.0326118	1	-0.0966851	1.4938e-22	-0.0404906	1	-0.0541801	1	-0.124016	1	-0.0181931	1	-0.204873	1	0.237695	1	-0.297282	1	0.152582	1	0.0309739	1	0.00622161	1	-0.0389377	1	-0.025913	1.13975e-07	FALSE	FALSE	-0.0856066	1.4222e-79	FALSE
Asf1a	-0.164307	1	-0.0736787	1	0.185855	1	-0.048342	1	0.154844	1	-0.0729486	1	-0.151323	0.0906116	-0.209905	1	0.0492727	1	-0.031547	3.37727e-11	-0.0230589	1	0.0592948	1	0.205834	1	-0.0139043	1	0.0649653	1	0.174445	1	0.284893	1	0.250137	1	-0.0564808	1	-0.0765274	1	-0.127882	1	0.0180779	0.118466	FALSE	FALSE	-0.0593684	7.29176e-74	FALSE
Asf1b	-0.192307	1	-0.242218	1	-0.0666666	1	-0.131699	1	0.158444	1	-0.0263514	1	-0.0164912	1	-0.205824	1	-0.0283592	1	0.0313532	1	0.093209	1	-0.166965	1	0.0372064	1	0.00807543	1	-0.0187593	1	-0.115593	1	0.0161325	1	-0.236802	1	0.00030157	1	0.147853	1	0.0191063	1	-0.0445883	1	FALSE	FALSE	-0.0364338	4.43579e-42	FALSE
Ash1l	0.0132992	1	0.0386752	1	-0.153132	1	0.020636	1	0.308571	1	0.0621882	1	0.0684086	1	-0.131125	1	0.0378201	1	-0.0728938	0.0543455	0.0669594	1	-0.143685	1	0.0933177	1	0.0298659	1	0.0967631	1	-0.0276743	1	-0.0968288	1	-0.0085096	1	0.121987	1	-0.201461	1	-0.0661273	1	0.00271689	1	FALSE	FALSE	0.0477751	1	FALSE
Ash2l	0.0331345	1	-0.180512	1	-0.0599939	1	-0.169196	1	0.0322531	1	0.0850151	1	-0.125817	1	-0.112869	1	-0.179423	1	-0.0661826	0.000459344	0.046637	1	-0.00977351	1	-0.010623	1	-0.0904609	1	0.123204	1	0.156459	1	0.228354	1	-0.171877	1	-0.198431	1	0.205892	1	-0.257098	1	-0.0343479	0.999946	FALSE	FALSE	-0.0673793	2.95561e-22	FALSE
Asl	0.0493223	1	0.00406931	1	0.208081	1	0.22519	1	-0.149683	1	0.00197136	1	0.0805792	1	-0.0431652	1	0.0032885	1	0.0318671	0.0416041	0.0405918	1	0.214355	1	0.0505777	1	0.00633555	1	0.0997415	1	0.315248	1	0.198225	1	-0.0332921	1	-0.117157	1	-0.0096166	1	-0.0662826	1	0.0528689	1	FALSE	FALSE	0.0473138	2.43578e-20	FALSE
Asna1	-0.175565	1	-0.177075	1	-0.105105	1	-0.180363	1	-0.137612	1	-0.0165683	1	0.0257866	1	-0.159924	1	0.013869	1	-0.0471225	7.92208e-06	0.00611834	1	-0.164514	1	-0.0742982	1	-0.19395	1	-0.0322814	1	0.289682	1	-0.189172	1	0.165455	1	-0.0561961	1	0.0269021	1	-0.134311	1	-0.0626783	0.990662	FALSE	FALSE	-0.129236	1.22556e-65	FALSE
Asnsd1	-0.132297	1	-0.058783	1	0.278375	1	-0.285247	1	0.0806579	1	-0.112756	1	-0.0793996	1	-0.08425	1	0.0719111	1	-0.0200017	7.64984e-12	-0.028676	1	0.109689	1	0.149211	1	-0.0530707	1	-0.235985	1	-0.132763	1	-0.130215	1	-0.0671051	1	0.174337	1	-0.0331368	1	-0.199837	1	-0.0375877	0.15636	FALSE	FALSE	-0.0358651	2.80384e-56	FALSE
Aspa	0.0979823	1	0.734331	1	0.213276	1	0.0649484	1	0.13518	1	0.180229	1	0.090253	1	-0.368853	1	-0.116047	1	0.0533767	1	-0.0197311	1	-0.0302873	1	0.229195	1	0.206586	1	0.0979575	1	0.15938	1	0.137464	1	0.0859765	1	0.0793497	1	0.0289811	1	0.201742	1	0.107681	1	FALSE	FALSE	-0.0724805	4.22787e-52	FALSE
Asph	0.0863637	1	0.205467	1	0.0690836	1	0.295042	1	-0.02438	1	0.0654218	1	0.111036	1	-0.0469006	1	0.0240815	1	-0.0637629	1.31882e-15	-0.0716388	1	0.0804864	1	-0.168447	1	-0.00361702	1	-0.0188331	1	-0.0330222	1	0.12566	1	0.172855	1	0.0121847	1	-0.182926	1	0.0374396	1	0.0319807	0.00600563	FALSE	FALSE	-0.147218	4.91462e-121	FALSE
Aspm	-0.0719846	1	-0.0826958	1	-0.0590152	1	0.0952074	1	-0.107591	1	9.23768e-06	1	0.153238	1	-0.100233	1	0.12372	1	0.0233768	1	-0.000829184	1	0.00330003	1	0.0794432	1	-0.371837	0.45156	0.188279	1	-0.392047	1	0.0173608	1	-0.273175	1	0.0150225	1	-0.043006	1	-0.0167016	1	-0.0390552	1	FALSE	FALSE	0.00248987	5.56158e-16	FALSE
Aspscr1	-0.0183533	1	0.0717804	1	0.238391	1	0.199325	1	0.161464	1	0.0655121	1	0.0424139	1	0.104796	1	0.0212777	1	0.0613146	1	0.080192	1	0.0626695	1	-0.083038	1	0.171202	1	0.147034	1	0.0212644	1	0.4199	1	0.310108	1	0.032519	1	0.0691257	1	-0.176077	1	0.0953724	1	FALSE	FALSE	0.0182275	2.31843e-20	FALSE
Asxl1	0.0131192	1	0.000805538	1	-0.0968523	1	0.0163659	1	-0.0120074	1	0.09566	1	0.0725045	1	0.120123	1	-0.0997761	1	0.025243	0.0108702	0.0948792	1	0.0693916	1	0.0446647	1	0.0131986	1	0.0823247	1	-0.104335	1	0.0419656	1	-0.202202	1	-0.044913	1	0.184134	1	0.0457678	1	0.0171457	1	FALSE	FALSE	0.0748474	1.41631e-05	FALSE
Asxl2	0.00522444	1	0.0833007	1	-0.258345	1	0.361217	1	-0.0398477	1	0.165749	1	-0.0721287	1	-0.128375	1	0.0469191	1	-0.0710146	1.41732e-24	-0.065654	1	0.219083	1	-0.250434	1	0.111836	1	-0.017318	1	0.0495703	1	-0.0255185	1	-0.166348	1	-0.209989	1	-0.304419	1	0.0844733	1	-0.0229533	5.61118e-08	FALSE	FALSE	-0.012945	3.6079e-53	FALSE
Atad1	-0.199363	1	-0.275916	1	0.0133122	1	-0.00419228	1	-0.383533	1	-0.157377	0.000745636	-0.0988206	1	0.136548	1	0.0425702	1	-0.089895	5.85521e-26	0.0405527	1	-0.184023	1	0.10488	1	-0.0283151	1	-0.119442	1	-0.263032	1	-0.147652	1	-0.250094	1	-0.0245549	1	0.0196518	1	0.0490878	1	-0.086648	5.09567e-11	FALSE	FALSE	-0.0827945	2.77642e-103	FALSE
Atad2	-0.596551	1	0.178364	1	-0.499504	1	0.155372	1	-0.154139	1	0.01791	1	-0.116225	1	-0.0883715	1	0.039361	1	0.0369528	1	0.0224715	1	-0.300711	1	0.0719527	1	-0.0825518	1	-0.0265952	1	-0.195463	1	-0.0713044	1	-0.0541378	1	0.0283642	1	0.00688201	1	0.00585633	1	-0.0772413	1	FALSE	FALSE	0.0973952	1	FALSE
Atad2b	-0.0784869	1	0.0581081	1	-0.0574623	1	-0.260275	1	-0.113145	1	-0.05519	1	-0.145557	1	-0.134293	1	-0.0289727	1	-0.0632385	1.5971e-18	-0.152235	0.408846	-0.172799	1	-0.0170199	1	0.0128991	1	-0.175333	1	-0.146164	1	-0.0113425	1	-0.0254998	1	-0.0227307	1	-0.0231999	1	0.0428505	1	-0.0747184	0.000136137	FALSE	FALSE	-0.0836076	1.36131e-87	FALSE
Atad3a	-0.192495	1	0.16646	1	0.04543	1	-0.0116415	1	0.220762	1	0.0969819	1	0.0417073	1	-0.107814	1	-0.213007	1	0.0224831	1	-0.124888	1	-0.185166	1	0.0150646	1	0.111955	1	-0.0792232	1	0.125109	1	0.247956	1	-0.332878	1	-0.146576	1	0.0244713	1	-0.00840636	1	-0.0135102	1	FALSE	FALSE	-0.0916542	8.87323e-55	FALSE
Atad5	0.109022	1	0.0536242	1	0.0600681	1	0.00871659	1	0.041473	1	0.0480712	1	-0.040099	1	0.0284776	1	0.251907	1	-0.00422534	1.06273e-05	-0.0562181	1	0.143415	1	-0.0884269	1	0.053663	1	0.0432768	1	-0.0106996	1	0.138558	1	-0.0513262	1	0.0248157	1	-0.0240826	1	-0.0507297	1	0.0323467	0.992818	FALSE	FALSE	0.0222676	2.6398e-16	FALSE
Atat1	-0.0253524	1	-0.0745044	1	-0.0529551	1	0.000889684	1	-0.0882335	1	0.0167993	1	-0.0994341	1	0.0279574	1	0.0545119	1	-0.0327241	1.73817e-15	-0.004706	1	0.0213061	1	-0.0467178	1	-0.0338307	1	-0.0477015	1	-0.132898	1	-0.0629838	1	-0.0764502	1	-0.0382754	1	-0.12136	1	0.0324111	1	-0.0373453	0.00679355	FALSE	FALSE	-0.0211507	7.46707e-51	FALSE
Ate1	-0.0324986	1	-0.173041	1	-0.136592	1	-0.0223901	1	0.0202787	1	0.012597	1	-0.0817956	1	-0.0711358	1	0.0589768	1	-0.0141315	2.51659e-13	0.0477766	1	-0.0199369	1	-0.150299	1	0.0217624	1	0.0159221	1	-0.283516	1	-0.132877	1	-0.0293714	1	0.0802847	1	0.0405358	1	0.00536568	1	-0.0401945	0.050939	FALSE	FALSE	-0.0218303	2.90886e-58	FALSE
Atf1	0.0426085	1	-0.164312	1	-0.234815	1	0.00814458	1	0.0841019	1	0.0150288	1	0.140314	1	-0.0583923	1	0.112799	1	0.0419852	0.273265	-0.0414292	1	-0.0630801	1	-0.0573492	1	-0.0302067	1	-0.0581036	1	0.182314	1	-0.112762	1	-0.172265	1	-0.0985287	1	-0.192636	1	-0.0283538	1	-0.032616	1	FALSE	FALSE	0.0551399	3.38577e-15	FALSE
Atf2	0.0262963	1	-0.0634856	1	-0.17218	1	0.107751	1	0.184387	1	0.215637	1	0.142904	1	-0.0769679	1	0.0618683	1	-0.0208248	3.93201e-11	0.0495474	1	0.129317	1	0.00755155	1	-0.118345	1	0.0556076	1	-0.0939912	1	0.00162865	1	-0.169117	1	0.122451	1	-0.105109	1	-0.0563238	1	0.0108859	0.245187	FALSE	FALSE	0.0580618	4.10649e-13	FALSE
Atf3	0.116287	1	0.159378	1	0.0247263	1	0.401162	1	-0.261586	1	0.383853	1	0.434361	1	-0.140233	1	-0.618901	1	-0.22203	1.70294e-08	-0.0798794	1	-0.132854	1	-0.462006	0.542843	0.0712876	1	0.0281061	1	-0.157938	1	-0.487718	1	-0.52086	1	-0.00244959	1	-0.462697	1	-0.19153	1	-0.101025	0.689856	FALSE	FALSE	-0.11899	6.69304e-40	FALSE
Atf4	-0.0172051	1	0.497898	1	0.111032	1	-0.0804537	1	-0.154637	1	-0.112152	1	-0.0599717	1	-0.194913	1	-0.148451	1	0.107952	1	-0.0120537	1	0.0828845	1	0.118564	1	0.0589808	1	0.029433	1	-0.295719	1	-0.062293	1	0.152272	1	0.194334	1	0.0482914	1	-0.115425	1	0.00706514	1	FALSE	FALSE	0.14524	1	FALSE
Atf6	-0.191762	1	-0.279014	1	-0.0269007	1	0.170917	1	0.0953617	1	0.289503	1	0.138475	1	0.01431	1	0.00351615	1	0.00500406	0.000172256	0.0682565	1	0.202686	1	0.112003	1	0.262032	1	0.133012	1	0.131031	1	0.0197615	1	0.0328555	1	-0.00755632	1	0.0621672	1	0.0737779	1	0.0623542	0.999729	FALSE	FALSE	0.031017	2.14887e-14	FALSE
Atf6b	-0.194438	1	-0.101708	1	0.0239937	1	-0.181243	1	0.138334	1	0.0158974	1	-0.0192406	1	-0.292468	1	-0.110125	1	-0.0391769	1.50718e-19	-0.0234004	1	-0.0976886	1	-0.0133905	1	-0.00403962	1	0.179868	1	0.00509524	1	-0.181722	1	-0.115574	1	-0.127204	1	-0.149312	1	-0.0521977	1	-0.0637971	6.09038e-05	FALSE	FALSE	-0.0799261	6.39165e-113	FALSE
Atf7	0.104166	1	0.0677083	1	-0.0312956	1	0.0136094	1	-0.0404017	1	0.0588797	1	0.0283891	1	0.262409	1	0.0646401	1	0.0432292	1	0.0265322	1	0.021683	1	-0.0349297	1	0.1631	1	0.187241	1	-0.0162185	1	-0.064258	1	-0.0680761	1	0.0733062	1	0.171616	1	0.0760412	1	0.0527319	1	FALSE	FALSE	0.0638613	0.00312412	FALSE
Atf7ip	-0.0696497	1	-0.0124945	1	0.129087	1	-0.0390492	1	-0.03981	1	0.103692	1	0.0467264	1	0.0356932	1	0.192605	1	-0.00224467	7.70501e-06	0.0215217	1	0.113882	1	-0.132478	1	-0.00256664	1	0.0212917	1	-0.0923743	1	-0.0511711	1	-0.0520965	1	0.0525825	1	-0.100798	1	-0.0561887	1	0.00315052	0.990434	FALSE	FALSE	0.0244235	1.15417e-22	FALSE
Atg101	0.00786643	1	-0.0161236	1	0.0339359	1	0.17642	1	-0.0242647	1	0.081334	1	0.0801724	1	0.141989	1	-0.0628201	1	0.111898	1	0.129405	1	0.0417184	1	0.180428	1	0.0476972	1	-0.00417664	1	0.391596	1	0.115894	1	0.0398024	1	0.110032	1	0.0788252	1	-0.0414064	1	0.0771535	1	FALSE	FALSE	0.157608	1	FALSE
Atg12	0.175201	1	-0.0815106	1	-0.0103563	1	0.0611559	1	-0.0151865	1	0.0656513	1	0.0337646	1	-0.0332466	1	0.182229	1	0.022597	1.90818e-06	0.0566352	1	0.145356	1	0.152315	1	0.0370589	1	0.0103233	1	-0.111701	1	-0.027436	1	-0.0253597	1	0.155879	1	0.0645967	1	-0.0593215	1	0.0380307	0.971859	FALSE	FALSE	0.0905757	2.43936e-05	FALSE
Atg16l1	0.113991	1	0.046043	1	0.121234	1	-0.0387616	1	-0.136883	1	-0.0131612	1	-0.0658047	1	-0.206074	1	-0.0847659	1	-0.0559177	3.73193e-20	-0.0830707	0.236548	-0.0574731	1	-0.0383376	1	0.055008	1	-0.0821336	1	-0.0314795	1	-0.0639952	1	0.00543439	1	0.0202608	1	0.0837299	1	-0.000789701	1	-0.024426	1.21195e-05	FALSE	FALSE	-0.0350978	1.11316e-66	FALSE
Atg16l2	-0.00528338	1	-0.0855147	1	-0.108118	1	-0.0104903	1	0.0322275	1	-0.0402833	1	0.0162486	1	-0.00993633	1	-0.0198333	1	-0.0171001	1.48134e-09	0.0774043	1	-0.0415782	1	-0.0242704	1	-0.0243751	1	-0.0836432	1	-0.0259032	1	-0.00856587	1	-0.146676	1	-0.0162483	1	0.0670598	1	-0.125234	1	-0.0285769	0.529775	FALSE	FALSE	-0.0176849	7.86176e-48	FALSE
Atg2a	0.00313617	1	-0.0404676	1	0.014501	1	0.0715668	1	0.184318	1	0.0769003	1	0.0554696	1	-0.0975029	1	0.0539956	1	0.000515304	4.55437e-06	0.0949157	1	0.0362751	1	-0.0788086	1	0.0819529	1	0.0989201	1	-0.0813826	1	0.00322664	1	-0.050231	1	0.0526835	1	-0.0435703	1	-0.0231035	1	0.0196814	0.985201	FALSE	FALSE	0.0163954	3.88435e-26	FALSE
Atg2b	-0.142287	1	0.0350494	1	-0.179771	0.0838064	0.205391	1	0.0768729	1	-0.0434588	1	-0.0822495	1	-0.0300351	1	0.00357493	1	-0.013439	7.81986e-09	-0.031617	1	0.130075	1	-0.0696114	1	-0.0593865	1	0.00895676	1	-0.0391644	1	-0.0894884	1	0.0670132	1	0.0109938	1	0.0921484	1	0.0168437	1	-0.0063614	0.458374	FALSE	FALSE	-0.00371785	1.13701e-31	FALSE
Atg3	0.099139	1	-0.0608665	1	0.158594	1	0.0225067	1	-0.0176686	1	-0.00726615	1	0.00532184	1	-0.039599	1	4.43089e-05	1	-0.0231519	2.48005e-10	-0.04166	1	-0.0336024	1	-0.105233	1	0.015981	1	-0.0721051	1	0.290098	1	-0.177231	1	-0.225597	1	-0.139134	1	0.275358	1	-0.0151074	1	-0.00434189	0.377451	FALSE	FALSE	-0.0529973	1.05195e-61	FALSE
Atg4b	-0.0084378	1	-0.000468365	1	-0.119384	1	-0.115254	1	-0.0924084	1	-0.00680847	1	0.0697105	1	0.164875	1	-0.030066	1	0.0261212	0.000255994	0.0565253	1	0.000649878	1	0.154525	1	0.109992	1	-0.124293	1	-0.00236538	1	-0.109277	1	-0.0660614	1	-0.084937	1	-0.119267	1	-0.136267	1	-0.0206142	0.999853	FALSE	FALSE	0.0117341	2.5359e-38	FALSE
Atg4d	-0.0866211	1	0.044593	1	-0.0295106	1	-0.0433345	1	-0.00420358	1	-0.073352	0.031581	0.035975	1	-0.171161	1	-0.0518265	1	-0.00598841	5.40029e-07	-0.00704096	1	-0.0712029	1	0.0472574	1	-0.0189081	1	-0.020906	1	-0.145385	1	0.180825	1	-0.123298	1	0.0145282	1	-0.0104564	1	-0.053509	1	-0.0282631	0.739693	FALSE	FALSE	-0.0267259	2.00505e-61	FALSE
Atg5	0.144915	1	0.23601	1	0.043645	1	-0.15754	1	-0.127053	1	-0.0350036	1	-0.0670762	1	-0.368409	1	0.219009	1	0.0454018	0.0421835	0.0331829	1	0.10665	1	0.117147	1	0.00599407	1	-0.111032	1	0.00590241	1	0.397805	1	0.0178185	1	-0.220349	1	0.0428456	1	0.0144383	1	0.0163953	1	FALSE	FALSE	-0.0264544	5.06722e-51	FALSE
Atg9a	0.113309	1	-0.0450611	1	-0.119445	1	0.0476971	1	-0.0925801	1	0.0471032	1	0.0614137	1	-0.173781	1	0.0810742	1	-0.0468392	5.79012e-16	0.0479006	1	0.0260054	1	-0.0143199	1	-0.000827774	1	-0.0518534	1	0.0766024	1	-0.0377732	1	0.0316704	1	0.0438869	1	-0.187301	1	0.0114916	1	-0.00864884	0.0041316	FALSE	FALSE	-0.0169085	6.93975e-51	FALSE
Atic	-0.270788	1	-0.0593487	1	-0.0602372	1	-0.275954	1	0.094584	1	-0.0499585	1	-0.0777138	1	0.0910702	1	-0.223927	1	-0.0418993	0.038085	0.0517218	1	-0.156399	1	-0.00176772	1	0.017139	1	-0.129226	1	0.28079	1	-0.0592299	1	0.134699	1	-0.122503	1	0.077134	1	-0.122463	1	-0.0430608	1	FALSE	FALSE	-0.0750817	5.01469e-25	FALSE
Atl2	-0.0975598	1	0.1647	1	-0.0805281	1	-0.0978974	1	-0.0973338	1	0.0372643	1	-0.0338428	1	0.0561568	1	0.0106229	1	-0.0168719	1.14502e-10	-0.0069049	1	-0.0520633	1	-0.0387186	1	-0.092277	0.270204	0.0307376	1	-0.0396669	1	0.0493703	1	-0.127021	1	0.111145	1	0.0283049	1	-0.0981246	1	-0.0185957	0.230432	FALSE	FALSE	-0.0215213	3.22561e-56	FALSE
Atl3	-0.109932	1	-0.0420991	1	0.0625964	1	-0.190936	1	-0.166094	1	0.00272814	1	0.0930435	1	-0.236029	1	0.136282	1	-0.0712913	6.10372e-28	0.0775323	1	0.0980399	1	0.031672	1	0.0345209	1	-0.00678309	1	-0.116477	1	-0.0436341	1	-0.00410748	1	-0.113517	1	0.143371	1	0.105917	1	-0.0150094	3.1788e-10	FALSE	FALSE	-0.00200423	2.72992e-47	FALSE
Atm	0.0492972	1	-0.0929577	1	0.0221821	1	0.156282	1	-0.0638065	1	0.152538	1	-0.135212	1	-0.17981	1	0.00344502	1	0.0348448	0.0100934	0.0205683	1	0.124523	1	-0.0734103	1	0.0807049	1	0.0436661	1	-0.176926	1	0.155907	1	0.253802	1	-0.00634877	1	0.185017	1	0.0578116	1	0.0291485	1	FALSE	FALSE	0.0438269	3.35485e-13	FALSE
Atn1	-0.0585522	1	-0.00979701	1	-0.0535121	1	-0.149507	1	-0.278645	1	0.0500361	1	-0.0855553	1	-0.137581	1	0.0787995	1	-0.0422346	1.02608e-16	-0.0155131	1	0.0650428	1	-0.0845331	1	0.0499093	1	0.00451946	1	-0.0159871	1	0.0553946	1	0.067919	1	0.0149697	1	-0.0395181	1	-0.0416701	1	-0.0298103	0.00182596	FALSE	FALSE	-0.00209922	2.291e-44	FALSE
Atox1	0.0479807	1	-0.433861	1	0.0817634	1	0.0268676	1	0.320736	1	0.215919	1	-0.104793	1	0.307723	1	0.141188	1	0.0782012	1	0.0260241	1	-0.00705443	1	0.281777	1	0.299266	1	0.0427385	1	0.204541	1	0.424241	1	0.291016	1	-0.0764988	1	0.184846	1	-0.189109	1	0.103024	1	FALSE	FALSE	0.091093	1	FALSE
Atp11a	0.0526143	1	-0.020275	1	-0.0644429	1	-0.0731615	1	-0.0872868	1	-0.0454009	1	-0.0841409	1	0.190891	1	0.0710077	1	-0.00341601	0.000872827	-0.0258804	1	0.000899726	1	0.134206	1	0.00942522	1	-0.12181	1	0.285747	1	-0.0287454	1	0.0689486	1	0.035508	1	-0.109781	1	-0.0353107	1	0.00712358	0.999984	FALSE	FALSE	-0.0357022	1.63717e-64	FALSE
Atp11b	-0.155627	1	0.179344	1	-0.189523	1	-0.390885	1	-0.310168	1	-0.067121	1	-0.155957	1	0.111643	1	-0.0213227	1	-0.0891801	3.06225e-14	-0.0347948	1	0.04053	1	-0.00153286	1	-0.0234153	1	0.125887	1	-0.12116	1	0.0404001	1	-0.252694	1	0.0443005	1	-0.305154	1	-0.163627	1	-0.0828599	0.022828	FALSE	FALSE	-0.0731444	2.99796e-57	FALSE
Atp11c	-0.154967	1	-0.0285729	1	-0.248998	0.633812	-0.00187203	1	0.117082	1	-0.0422164	1	-0.0435904	1	0.123103	1	-0.0228628	1	-0.0413893	3.55821e-14	0.0197344	1	0.0165716	1	-0.0420643	1	0.0416805	1	-0.019697	1	-0.0888582	1	0.0697686	1	-0.0999962	1	-0.0249668	1	0.372202	1	-0.0295839	1	-0.00616641	0.0201868	FALSE	FALSE	-0.0189105	1.01503e-45	FALSE
Atp13a1	-0.0640102	1	-0.181	1	-0.0515121	1	0.17271	1	0.228893	1	-0.0333766	1	-0.0382029	1	-0.111477	1	-0.0847436	1	-0.0451577	3.51189e-14	-0.000295296	1	-0.0534227	1	-0.072228	1	-0.0832421	1	0.0591255	1	0.0526574	1	0.130339	1	-0.105588	1	-0.017164	1	-0.0823976	1	0.0198694	1	-0.0171535	0.0241082	FALSE	FALSE	-0.0395123	1.29105e-67	FALSE
Atp13a3	-0.0980448	1	-0.0445227	1	-0.112918	1	-0.176144	1	-0.0768193	1	-0.0725599	1	-0.127191	1	0.173073	1	-0.210402	1	-0.0517938	7.26508e-15	-0.118124	1	-0.205775	1	-0.276226	1	-0.118404	1	-0.155845	1	-0.12313	1	0.175781	1	-0.0575301	1	0.0409227	1	-0.199935	1	-0.00106136	1	-0.0874595	0.0126336	FALSE	FALSE	-0.0562821	4.14638e-69	FALSE
Atp1a1	-0.271983	1	0.115664	1	0.16862	1	-0.239148	1	-0.0140152	1	0.0888823	1	-0.0942181	1	-0.248716	1	-0.0746728	1	-0.015883	0.243491	-0.145556	1	-0.158348	1	-0.173331	1	0.143882	1	-0.0380882	1	0.0252699	1	0.0846793	1	-0.182219	1	0.216058	1	-0.0557492	1	-0.028796	1	-0.0427461	1	FALSE	FALSE	-0.167324	8.06035e-72	FALSE
Atp1b3	-0.185823	1	-0.138626	1	-0.0923195	1	0.125714	1	-0.0838364	1	0.0151967	1	-0.0531371	1	0.220156	1	0.0297389	1	-0.0268754	5.55299e-07	-0.104272	1	0.118274	1	0.224348	1	-0.0332712	1	0.174044	1	0.145318	1	0.0791519	1	0.331428	1	0.150398	1	0.0515882	1	-0.0422788	1	0.0430912	0.939522	FALSE	FALSE	-0.0703072	8.04664e-51	FALSE
Atp2a2	-0.106291	1	0.275348	1	-0.148763	1	-0.144987	1	-0.239074	1	0.0820123	1	-0.0687316	1	-0.104673	1	-0.0410489	1	-0.0768195	4.91788e-07	-0.100911	1	-0.0780016	1	-0.0873159	1	0.112432	1	0.215419	1	0.138581	1	-0.087258	1	-0.0077684	1	-0.067781	1	-0.137745	1	-0.0242776	1	-0.0332216	0.935329	FALSE	FALSE	-0.128389	1.62712e-47	FALSE
Atp2b1	-0.190696	1	0.112206	1	-0.0864531	1	0.253157	1	-0.0904002	1	-0.0492254	1	0.0855133	1	-0.230857	1	0.0843311	1	-0.0325028	0.896827	0.0492467	1	-0.0323189	1	-0.311139	1	0.14821	1	-0.35329	1	0.116349	1	0.167126	1	-0.0490588	1	-0.314825	1	-0.105268	1	-0.068382	1	-0.042775	1	FALSE	FALSE	-0.0383985	9.36802e-13	FALSE
Atp2c1	-0.0195847	1	-0.0394234	1	0.0487319	1	0.0781063	1	-0.230747	1	0.130223	1	-0.107953	1	-0.0456215	1	0.00800849	1	-0.0840767	1.93172e-28	-0.00132108	1	-0.180996	1	-0.147694	1	-0.117307	0.00997537	-0.0912073	1	-0.0114671	1	-0.126803	1	0.0252802	1	-0.0609552	1	-0.160475	1	-0.037638	1	-0.0558533	5.61403e-12	FALSE	FALSE	-0.0357541	3.44213e-68	FALSE
Atp5a1	0.215455	1	-0.109108	1	0.1426	1	-0.0984295	1	-0.0140115	1	-0.0809841	1	0.0537786	1	-0.150527	1	-0.141653	1	-0.0812321	0.000712813	-0.0595839	1	-0.0664519	1	-0.0416111	1	-0.0836268	1	-0.158718	1	0.047307	1	0.141667	1	0.0203674	1	-0.107921	1	-0.123841	1	-0.167255	1	-0.0411324	0.999976	FALSE	FALSE	-0.0139234	0.0306821	FALSE
Atp5b	-0.000793642	1	0.0700278	1	0.0941594	1	-0.0422266	1	-0.0697365	1	-0.053675	1	0.0683727	1	-0.568461	0.742463	-0.0626398	1	-0.0159024	1	-0.312804	4.09922e-05	-0.0124225	1	0.0202306	1	-0.0979324	1	-0.310109	1	0.180188	1	0.0650439	1	-0.0544015	1	-0.134627	1	-0.1344	1	-0.128398	1	-0.0714527	0.997499	FALSE	FALSE	-0.106259	6.22773e-30	FALSE
Atp5d	-0.153001	1	0.0232964	1	-0.0371683	1	-0.106601	1	0.0996318	1	-0.036984	1	-0.0116045	1	-0.442362	1	-0.160919	1	0.0683123	1	-0.144984	1	-0.109609	1	0.204135	1	-0.00647074	1	-0.0554011	1	0.0307909	1	0.000743479	1	0.030442	1	-0.0564315	1	0.229752	1	-0.054724	1	-0.032817	1	FALSE	FALSE	-0.0907283	3.18206e-25	FALSE
Atp5e	0.0608659	1	-0.0908018	1	-0.147468	1	0.0393126	1	-0.229206	1	0.0580077	1	0.244898	1	-0.0549823	1	0.0310654	1	-0.0119438	1	0.0949453	1	0.134287	1	-0.0450821	1	0.0910259	1	0.00971764	1	0.0587863	1	0.207157	1	-0.093464	1	0.0554294	1	-0.00705589	1	-0.140496	1	0.012619	1	FALSE	FALSE	0.126792	3.42581e-19	FALSE
Atp5f1	-0.174808	1	-0.114062	1	0.0432256	1	0.0198111	1	0.101688	1	-0.1781	1	-0.170879	1	-0.266203	1	-0.164524	1	-0.0112975	1	0.0120199	1	-0.0551926	1	-0.0171901	1	-0.187266	1	-0.0815384	1	-0.178376	1	0.0542362	1	0.111152	1	0.00314578	1	0.162824	1	-0.182999	1	-0.0606826	1	FALSE	FALSE	-0.0533342	2.36293e-08	FALSE
Atp5g1	-0.0199889	1	-0.316794	1	0.0272097	1	-0.0288175	1	0.361756	1	-0.0302827	1	0.0829703	1	-0.102307	1	0.18995	1	0.0796324	1	-0.137203	1	0.161356	1	0.195946	1	0.101553	1	-0.0822706	1	0.112497	1	0.144643	1	0.31052	1	-0.0798441	1	0.311587	1	-0.00554006	1	0.0607892	1	FALSE	FALSE	0.190654	1.33644e-32	FALSE
Atp5g2	0.261064	1	0.343361	1	-0.0895504	1	-0.107933	1	-0.157196	1	-0.310865	0.00126161	0.160226	1	-0.0205503	1	-0.019119	1	0.078336	1	0.055259	1	0.0565688	1	0.331155	1	-0.0628498	1	-0.137828	1	-0.148344	1	-0.124729	1	-0.0676707	1	0.10103	1	0.310123	1	-0.0258524	1	0.0202207	0.999993	FALSE	FALSE	0.15693	5.48738e-33	FALSE
Atp5g3	0.161031	1	0.0364262	1	0.448281	1	-0.233787	1	0.402658	1	0.0738513	1	0.144321	1	0.146676	1	-0.182869	1	0.0533861	1	0.0909372	1	-0.0446797	1	0.145949	1	0.0546757	1	0.117539	1	0.103031	1	0.100431	1	0.0771887	1	0.165742	1	0.161734	1	0.000956711	1	0.0963561	1	FALSE	FALSE	0.152711	3.11761e-19	FALSE
Atp5h	-0.013887	1	-0.0824387	1	0.0946149	1	0.128704	1	0.0176183	1	-0.0114957	1	0.0836262	1	-0.236693	1	-0.10381	1	0.0227634	1	-0.0181066	1	-0.0903763	1	0.132119	1	-0.116595	1	0.0507778	1	-0.0553159	1	0.115816	1	-0.148003	1	-0.00762019	1	0.218608	1	-0.0988052	1	-0.0056428	1	FALSE	FALSE	-0.000348697	1	FALSE
Atp5j	0.261024	1	-0.337982	1	0.173101	1	0.0368307	1	0.500746	1	-0.0356623	1	0.0161008	1	-0.167923	1	-0.0263175	1	0.0764684	1	-0.0564943	1	0.0796194	1	-0.0936592	1	0.0558572	1	0.134196	1	0.376179	1	0.451951	1	0.0467849	1	0.012975	1	0.0420738	1	0.0108287	1	0.0741284	1	FALSE	FALSE	0.0317973	1	FALSE
Atp5j2	0.125111	1	-0.354434	1	0.0624004	1	-0.17256	1	-0.213611	1	-0.249928	1	-0.117936	1	-0.123346	1	-0.128443	1	0.0190125	1	0.00977677	1	-0.0717406	1	0.1891	1	0.0365272	1	-0.0355431	1	-0.0642312	1	0.0689347	1	0.163105	1	-0.141821	1	-0.0724022	1	-0.281167	1	-0.0644379	1	FALSE	FALSE	0.000802592	1	FALSE
Atp5k	0.18255	1	0.14889	1	0.0732907	1	0.202872	1	-0.000611628	1	0.403305	0.0233526	0.105078	1	0.162569	1	0.101765	1	0.130981	0.0323851	0.11499	1	0.134858	1	0.0119087	1	0.231581	1	0.0512309	1	0.195584	1	0.392335	1	0.158181	1	0.153848	1	0.125152	1	0.311935	1	0.161538	0.999979	FALSE	FALSE	0.136035	4.08347e-13	FALSE
Atp5l	-0.203268	1	-0.0394793	1	-0.080747	1	0.157764	1	0.336361	1	0.154928	1	-0.0310742	1	0.0722565	1	0.0479359	1	0.0456415	1	0.0551317	1	0.0392429	1	-0.0495862	1	0.0331905	1	0.139711	1	-0.097395	1	0.381477	1	0.0193115	1	0.0110354	1	-0.175894	1	-0.111986	1	0.0335504	1	FALSE	FALSE	0.0267185	1	FALSE
Atp5o.1	0.0946132	1	-0.476559	1	0.19523	1	0.0426261	1	0.0664859	1	-0.022597	1	-0.0302225	1	-0.186788	1	0.00696963	1	0.107464	1	0.070115	1	0.0104943	1	-0.0759322	1	0.0327454	1	-0.0598227	1	-0.0309837	1	0.301663	1	0.254065	1	0.121993	1	0.525461	1	0.048408	1	0.0474014	1	FALSE	FALSE	0.0504093	1	FALSE
Atp6ap1	0.0424983	1	0.0283662	1	0.0198523	1	-0.17355	1	0.261954	1	0.0906099	1	-0.107145	0.0241896	0.196057	1	0.159103	1	0.0171676	0.00628992	0.0395166	1	0.180349	1	0.10605	1	0.0999452	1	-0.0772696	1	-0.0930943	1	-0.0661057	1	0.0286377	1	0.038446	1	-0.110951	1	-0.0261359	1	0.0311572	0.999674	FALSE	FALSE	0.0536364	2.26452e-11	FALSE
Atp6ap2	0.0503826	1	-0.352168	1	-0.154851	1	-0.120675	1	0.034972	1	-0.0256393	1	-0.216155	0.0255835	-0.125987	1	0.0465451	1	-0.0542661	1.00693e-11	-0.0416466	1	0.176201	1	0.0240485	1	-0.0200026	1	-0.0236506	1	-0.114392	1	-0.0232077	1	0.104558	1	-0.196302	1	-0.205467	1	-0.00787782	1	-0.0593134	0.0513714	FALSE	FALSE	-0.0517793	4.56858e-51	FALSE
Atp6v0a2	-0.0688629	1	-0.234507	1	-0.0287232	1	0.118858	1	0.109169	1	-0.00469555	1	-0.0807806	1	-0.0810728	1	-0.0387735	1	-0.0389349	3.72203e-15	-0.0235777	1	-0.031785	1	0.0575487	1	0.053979	1	-0.0368235	1	0.0672726	1	0.0113035	1	-0.230756	1	0.000699813	1	-0.0441568	1	-0.0794707	1	-0.0287662	0.00948889	FALSE	FALSE	-0.0511549	1.10339e-77	FALSE
Atp6v0d1	0.158605	1	-0.0107008	1	0.00907444	1	0.101987	1	0.0564836	1	0.0991684	1	0.079281	1	0.167495	1	0.0577954	1	0.0576255	0.221941	0.0598272	1	0.0168105	1	-0.0129813	1	-0.0108219	1	0.0261887	1	-0.0907091	1	0.0669254	1	0.0782773	1	0.0472815	1	-0.187007	1	0.172636	1	0.0449163	1	FALSE	FALSE	0.0627958	1.6223e-10	FALSE
Atp6v0e	0.366302	1	-0.433741	1	-0.0350501	1	-0.14316	1	0.206738	1	0.166732	1	-0.18246	1	0.258296	1	0.346111	1	0.0103546	1	0.125156	1	0.00824822	1	0.234909	1	0.0981159	1	0.191164	1	0.0106922	1	-0.0609439	1	-0.0754974	1	0.0142034	1	-0.280617	1	0.0578979	1	0.0420691	1	FALSE	FALSE	-0.136742	1.47295e-31	FALSE
Atp6v1a	-0.166559	1	-0.205405	1	-0.0297456	1	0.038808	1	0.0235816	1	0.0653261	1	-0.151296	0.151995	-0.118163	1	0.179594	1	0.00493782	4.87952e-08	-0.116559	1	0.205364	1	0.066522	1	0.0478205	1	-0.00111983	1	0.00230172	1	0.301622	1	0.273714	1	-0.0404141	1	0.110401	1	-0.0519513	1	0.0208943	0.671257	FALSE	FALSE	0.00763647	2.20626e-38	FALSE
Atp6v1b2	0.00288812	1	0.0977744	1	-0.219049	1	0.0821491	1	0.0326807	1	0.0940671	1	0.0537703	1	0.0964855	1	-0.121245	1	-0.0177315	2.59647e-10	-0.037699	1	-0.0535627	1	-0.131296	1	-0.0263286	1	0.119773	1	-0.0633027	1	0.00535319	1	-0.169232	1	0.0293078	1	-0.152576	1	-0.0934974	1	-0.0224414	0.381129	FALSE	FALSE	-0.0418837	3.97979e-72	FALSE
Atp6v1c1	0.0192994	1	-0.104304	1	-0.0204206	1	-0.235194	1	-0.0656824	1	-0.0515844	1	-0.0137227	1	0.168969	1	0.051699	1	0.0347308	0.00474065	0.0491614	1	-0.0485324	1	-0.088638	1	0.0481732	1	0.0694374	1	-0.403524	1	-0.0313965	1	-0.0167738	1	-0.0235567	1	0.0804562	1	-0.0569485	1	-0.0303977	1	FALSE	FALSE	0.0530104	4.58907e-13	FALSE
Atp6v1d	-0.0250689	1	-0.142714	1	0.0418376	1	-0.0444239	1	-0.00280079	1	-0.0357301	1	-0.107894	1	-0.0460625	1	-0.0713607	1	-0.0368087	4.24464e-09	0.0504277	1	-0.0312197	1	-0.103699	1	0.0480467	1	-0.0757051	1	0.154258	1	-0.109932	1	0.0807067	1	-0.0919281	1	-0.204211	1	0.296192	1	-0.0218138	0.622983	FALSE	FALSE	-0.0300872	5.3995e-35	FALSE
Atp6v1e1	0.02306	1	0.169845	1	0.0684718	1	0.514641	1	0.415538	1	0.399129	1	0.129252	1	0.476066	1	0.53456	1	0.161789	1	0.223608	1	0.0651541	1	0.0927327	1	0.246611	1	0.565404	1	-0.0164919	1	0.201959	1	0.261783	1	0.165241	1	-0.042555	1	0.119339	1	0.227387	1	FALSE	FALSE	0.189085	9.06037e-06	FALSE
Atp6v1f	0.034601	1	-0.0460213	1	0.0496651	1	0.080726	1	0.134551	1	0.095413	1	-0.0885656	1	0.185771	1	0.307518	1	0.0433748	1	0.1556	1	0.0669872	1	0.209751	1	0.0984314	1	0.121604	1	-0.08776	1	-0.16096	1	0.328702	1	0.116524	1	-0.091585	1	0.121378	1	0.0797955	1	FALSE	FALSE	0.0901743	1	FALSE
Atp6v1g1	-0.0944345	1	-0.328578	1	-0.19362	1	-0.444366	1	0.17064	1	0.325285	0.714247	-0.201578	1	0.102056	1	0.0252111	1	-0.0700612	0.145646	-0.101969	1	-0.240451	1	-0.199898	1	-0.194787	1	-0.0654268	1	-0.0636421	1	-0.110957	1	-0.00356859	1	-0.213972	1	-0.101488	1	-0.164778	1	-0.103352	1	FALSE	FALSE	-0.19309	4.76688e-77	FALSE
Atp6v1h	0.148826	1	-0.165037	1	-0.142326	1	0.000370003	1	0.234109	1	-0.0209892	1	-0.0485091	1	-0.187649	1	-0.171909	1	-0.0804572	2.12143e-25	-0.0774962	1	-0.102628	1	-0.202658	1	-0.0138109	1	-0.0807168	1	0.15998	1	-0.276299	1	-0.123843	1	0.175655	1	-0.0487491	1	0.0149266	1	-0.0480576	1.62905e-08	FALSE	FALSE	-0.0562888	4.16959e-77	FALSE
Atp7a	0.286101	1	-0.0844388	1	-0.145297	1	-0.103904	1	0.122709	1	0.0339947	1	0.0080439	1	-0.0384804	1	0.120697	1	-0.0462631	1.24157e-17	0.0320128	1	-0.0442067	1	0.0135682	1	0.023469	1	-0.0128059	1	0.196734	1	-0.202617	1	-0.0177716	1	0.0352564	1	0.0585969	1	0.00596964	1	0.0114937	0.000640005	FALSE	FALSE	0.016772	2.83339e-24	FALSE
Atp8b2	0.0579755	1	-0.0941797	1	-0.0198498	1	-0.138084	1	-0.126593	1	0.04664	1	0.0239862	1	-0.0665413	1	-0.142243	1	-0.0250471	1.42489e-13	0.0532561	1	-0.0444433	1	0.115688	1	0.0740866	1	0.146279	1	-0.303449	1	0.0329608	1	-0.0820765	1	-0.0611881	1	0.0429199	1	0.00951199	1	-0.0238281	0.0413341	FALSE	FALSE	-0.0269519	8.16689e-65	FALSE
Atpaf1	-0.0520408	1	-0.124135	1	0.00205722	1	-0.0018357	1	-0.172956	1	0.0495169	1	-0.0777341	1	-0.0333223	1	-0.0277305	1	0.000204094	7.38874e-09	0.0327246	1	-0.0576677	1	-0.01293	1	0.00774869	1	0.0653125	1	-0.000112991	1	-0.00130373	1	-0.129487	1	-0.100595	1	-0.0620525	1	-0.0238656	1	-0.0342955	0.670936	FALSE	FALSE	-0.0326504	5.76289e-72	FALSE
Atpaf2	-0.0409495	1	0.089097	1	0.019947	1	-0.108598	1	-0.23876	1	-0.0206181	1	-0.051103	1	-0.0815476	1	-0.0468463	1	-0.0101423	6.30622e-11	-0.0295879	1	-0.0678967	1	-0.209367	1	-0.0436745	1	0.0772513	1	0.0491126	1	-0.0284358	1	0.0630672	1	0.0308027	1	0.0573285	1	-0.0663271	1	-0.0312975	0.276001	FALSE	FALSE	-0.0337631	2.7105e-60	FALSE
Atpif1	-0.142047	1	-0.232791	1	0.0265239	1	-0.294985	1	0.368338	1	-0.0821986	1	-0.235521	1	-0.107507	1	-0.0528239	1	-0.0368316	1	-0.114314	1	-0.0479728	1	0.0271722	1	-0.103658	1	-0.191277	1	-0.0850218	1	0.154939	1	-0.0383905	1	-0.163351	1	0.0748816	1	-0.129875	1	-0.0669862	1	FALSE	FALSE	-0.138461	1.35711e-43	FALSE
Atrn	0.0585454	1	0.0260052	1	0.0892903	1	-0.0627574	1	-0.0432752	1	0.0788574	1	0.0241052	1	-0.0838711	1	0.0560034	1	0.00828206	2.33845e-05	0.0668777	1	0.18518	1	0.122294	1	0.0517826	1	-0.104979	1	0.00564737	1	-0.0538383	1	-0.135109	1	0.0201395	1	-0.0119311	1	0.0424575	1	0.0161765	0.996684	FALSE	FALSE	0.0185808	1.37344e-22	FALSE
Atrx	0.00552842	1	0.286035	1	-0.277312	1	0.0873706	1	0.263497	1	0.155441	1	-0.125258	1	0.375054	1	0.186151	1	-0.152328	3.80148e-07	0.123962	1	0.125041	1	-0.112942	1	0.452725	1	0.28853	1	0.103178	1	0.0500282	1	-0.140374	1	0.103413	1	-0.236135	1	-0.0628511	1	0.0713693	0.925787	FALSE	FALSE	0.13282	1.04127e-05	FALSE
Atxn1l	0.0694933	1	0.0541346	1	0.0440968	1	-0.0393076	1	-0.115255	1	-0.0236937	1	0.0252687	1	0.0774869	1	0.0170804	1	-0.0248146	2.49471e-10	0.0551256	1	-0.0112936	1	-0.165071	1	-0.0626015	0.033523	0.0330772	1	-0.184404	1	-0.0433637	1	-0.0900918	1	0.0437573	1	0.066657	1	0.0524569	1	-0.0105363	0.160484	FALSE	FALSE	-5.8791e-05	7.31897e-27	FALSE
Atxn2	0.164899	1	-0.142641	1	0.0434055	1	-0.0798006	1	-0.196776	1	-0.0764478	1	-0.0346499	1	0.0632607	1	-0.0577024	1	-0.0802422	1.01307e-13	0.148331	1	-0.109334	1	0.00584988	1	0.0479005	1	0.0428308	1	-0.107851	1	0.229898	1	-0.282693	1	0.0201623	1	-0.201087	1	-0.10945	1	-0.0339112	0.0363634	FALSE	FALSE	-0.0254357	3.41293e-30	FALSE
Atxn2l	-0.187745	1	-0.0884654	1	-0.0878207	1	-0.137706	1	0.0881694	1	-0.236241	0.0158804	-0.156632	1	-0.128979	1	-0.0692287	1	-0.163317	1.26922e-37	-0.12624	1	-0.164983	1	0.115186	1	-0.118544	0.918574	-0.0323572	1	-0.255476	1	0.0534822	1	-0.0915821	1	-0.0745112	1	-0.267022	1	-0.0312772	1	-0.102919	9.9024e-19	FALSE	FALSE	-0.140996	3.69098e-127	FALSE
Atxn3	-0.00534568	1	-0.0999416	1	-0.184974	1	-0.13601	1	-0.0506827	1	0.0477836	1	-0.0254883	1	0.12656	1	0.105591	1	-0.0502347	2.56e-23	-0.0242072	1	0.0215656	1	0.0323567	1	-0.090749	1	-0.125322	1	0.0181762	1	-0.0745586	1	-0.129695	1	-0.0346135	1	-0.0436054	1	-0.125761	1	-0.040436	3.53597e-07	FALSE	FALSE	-0.0267279	1.01649e-57	FALSE
Atxn7l2	0.00190631	1	0.0840803	1	-0.0151774	1	-0.0487567	1	0.0615527	1	0.0176411	1	0.0613761	1	-0.0800126	1	-0.0600479	1	0.000704941	2.17704e-06	0.087588	1	-0.0046347	1	0.0257798	1	-0.0503154	0.237109	-0.14767	1	-0.0796849	1	-0.0243614	1	-0.154293	1	0.0381744	1	0.0934713	1	-0.142507	1	-0.0159613	0.937025	FALSE	FALSE	0.0028769	7.2782e-37	FALSE
Atxn7l3	0.0923605	1	0.0207756	1	0.0898638	1	-0.0691051	1	0.0851208	1	0.0618595	1	0.0347061	1	0.0102905	1	-0.0220366	1	-0.0377971	3.09268e-13	0.0270777	1	0.00220342	1	0.0843765	1	0.0323444	1	0.134499	1	0.0946048	1	-0.00818847	1	-0.108063	1	-0.0568595	1	0.0349408	1	-0.0785288	1	0.0202116	0.0548646	FALSE	FALSE	0.0476623	5.9683e-14	FALSE
Atxn7l3b	0.327589	1	-0.23238	1	0.0652475	1	-0.392358	1	0.250595	1	0.030574	1	0.0763934	1	0.114978	1	-0.0551948	1	0.00203285	1	-0.0161986	1	-0.117225	1	0.0715002	1	0.151062	1	0.104941	1	-0.106286	1	0.0726258	1	0.276791	1	0.0596957	1	-0.165848	1	0.117561	1	0.0302903	1	FALSE	FALSE	-0.00138765	0.000248594	FALSE
AU019823	-0.198842	1	-0.0880999	1	0.0660698	1	0.191426	1	-0.0310655	1	0.0286989	1	0.016983	1	0.0536866	1	-0.0426913	1	0.0164428	5.17333e-06	-0.0330898	1	-0.0329705	1	0.00989999	1	-0.0131696	1	0.104061	1	0.239447	1	0.0809045	1	0.142834	1	-0.022145	1	-0.198562	1	-0.0662115	1	0.0106479	0.986639	FALSE	FALSE	-0.0163062	2.76196e-53	FALSE
AU020206	0.0540067	1	0.0094079	1	0.116102	1	0.0685238	1	-0.16338	1	0.112385	1	0.0600253	1	-0.0205332	1	0.103666	1	0.0305911	0.344895	0.0441342	1	0.113557	1	-0.0563379	1	0.0679234	1	0.183805	1	-0.000769918	1	0.0749965	1	0.0753137	1	0.157001	1	-0.101182	1	0.134507	1	0.0506544	1	FALSE	FALSE	0.0661115	1	FALSE
AU040320	-0.0949355	1	0.316293	1	-0.0720778	1	0.0550422	1	-0.00180227	1	0.0220435	1	0.0291924	1	0.019944	1	0.0391994	1	-0.00975446	1.39428e-08	0.00244639	1	-0.0286688	1	0.143359	1	0.0518834	1	0.0294298	1	-0.240335	1	0.0453746	1	-0.0747598	1	-0.0465326	1	-0.0100587	1	-0.0386321	1	0.00650717	0.723639	FALSE	FALSE	-0.0373316	4.98302e-76	FALSE
Auh	0.280382	1	0.0426459	1	0.148468	1	-0.183442	1	-0.0587164	1	0.0331504	1	0.0716088	1	0.105599	1	-0.114867	1	0.066925	1	0.0872116	1	-0.0466512	1	0.0184235	1	0.052312	1	0.33971	1	-0.0689939	1	0.20156	1	-0.0918903	1	0.0741395	1	-0.0405694	1	0.084342	1	0.0476833	1	FALSE	FALSE	0.125333	1	FALSE
Aup1	0.0502871	1	0.0815089	1	0.12095	1	0.0143457	1	0.436702	1	0.0104059	1	-0.118293	1	-0.293761	1	0.123976	1	-0.046448	0.000237422	0.044059	1	-0.257561	1	-0.151956	1	0.0747524	1	-0.267227	1	-0.0982802	1	0.215701	1	-0.0118382	1	-0.0974621	1	0.235768	1	0.182768	1	0.0118284	0.999835	FALSE	FALSE	-0.0748241	1.1428e-32	FALSE
Aurka	-0.285146	1	-0.049251	1	0.0231495	1	-0.0978136	1	-0.125268	1	-0.046041	1	0.0653303	1	-0.123112	1	-0.0718289	1	0.0907897	1	-0.0155915	1	-0.0115085	1	0.0885405	1	-0.159705	1	0.045392	1	-0.1518	1	-0.119893	1	0.250384	1	0.101166	1	0.0495298	1	-0.0135023	1	-0.0264848	1	FALSE	FALSE	0.0371568	1.73716e-12	FALSE
Aurkaip1	-0.117563	1	0.0458295	1	0.403702	1	0.0318411	1	0.0959929	1	0.0400946	1	0.0324755	1	-0.138904	1	0.137859	1	0.075776	1	-0.102594	1	-0.10546	1	0.158237	1	-0.0668673	1	-0.0393217	1	-0.238283	1	-0.0877963	1	-0.417461	1	-0.120473	1	0.083784	1	-0.0193722	1	-0.0165955	1	FALSE	FALSE	-0.178759	3.31733e-71	FALSE
Aurkb	-0.361325	1	-0.11757	1	0.0401618	1	0.11493	1	0.0804859	1	-0.0432252	1	0.0871221	1	-0.104261	1	-0.107893	1	0.0310333	1	0.0417495	1	-0.0943364	1	0.181518	1	0.0216011	1	-0.112048	1	-0.269662	1	-0.15292	1	0.320167	1	-0.162521	1	-0.0390923	1	0.0455567	1	-0.0285965	1	FALSE	FALSE	-0.0041023	1.55164e-14	FALSE
Aven	0.0406282	1	0.17583	1	-0.0930439	1	-0.0631645	1	0.403644	1	-0.068802	1	-0.00954094	1	0.137331	1	0.10528	1	0.0230626	0.000392784	0.0755672	1	-0.119645	1	0.00823519	1	0.0377898	1	0.100059	1	0.114113	1	0.250433	1	-0.0615451	1	0.0158983	1	-0.0588974	1	0.0285967	1	0.0496109	0.999928	FALSE	FALSE	-0.00602973	1.70814e-44	FALSE
Avl9	0.00309718	1	-0.177828	1	-0.111185	1	-0.0368465	1	0.0194424	1	0.00325418	1	-0.107512	0.848438	-0.0955146	1	-0.171167	1	-0.0797267	2.09923e-30	-0.0499701	1	0.0344396	1	0.00744729	1	-0.0856769	0.300217	-0.205938	1	0.136046	1	-0.0239622	1	-0.143687	1	-0.0994769	1	0.0201872	1	-0.0175442	1	-0.0562915	2.24202e-12	FALSE	FALSE	-0.040581	3.24665e-73	FALSE
Avpi1	0.10072	1	0.210178	1	0.0596099	1	-0.192031	1	0.223152	1	0.0529243	1	0.0838755	1	0.549165	1	0.213453	1	0.146734	1	0.0820978	1	0.250988	1	0.2312	1	0.274823	1	0.429301	1	0.154761	1	0.358128	1	0.357656	1	-0.0317709	1	0.238671	1	0.0568969	1	0.183359	1	FALSE	FALSE	0.0713061	1	FALSE
AW209491	-0.0153632	1	-0.153058	1	-0.0551575	1	-0.0390703	1	0.211229	1	0.0637328	1	-0.0651007	1	0.0694421	1	-0.0467373	1	-0.0129505	1.55027e-08	0.0776483	1	0.0347787	1	0.131855	1	-0.0724179	1	-0.1039	1	0.110858	1	0.104336	1	-0.0947665	1	-0.0929116	1	-0.0905138	1	0.0829189	1	0.00213582	0.732135	FALSE	FALSE	0.0197074	7.85108e-22	FALSE
AW549877	0.0592578	1	0.0912172	1	0.117263	1	-0.000922984	1	0.0352816	1	-0.00745983	1	0.00386324	1	0.199893	1	-0.0195195	1	-0.0299719	5.26394e-16	0.0400047	1	-0.0333424	1	-0.00914215	1	-0.127287	0.0332193	0.0413449	1	0.0680513	1	-0.0191839	1	-0.0670715	1	0.231368	1	-0.113016	1	-0.0681152	1	0.0186911	0.000761385	FALSE	FALSE	0.0266026	1.95911e-29	FALSE
Axin1	-0.0931261	1	0.113433	1	-0.0592256	1	0.183517	1	0.34712	1	-0.0631632	1	0.0137051	1	-0.0797351	1	-0.125189	1	-0.0247876	1.02275e-11	-0.0176951	1	-0.150085	1	-0.118006	1	-0.0591621	1	0.0538419	1	0.0495069	1	0.118247	1	0.0323379	1	0.0772243	1	-0.0922072	1	-0.223965	1	-0.0055911	0.170092	FALSE	FALSE	-0.0564534	2.28499e-82	FALSE
Axl	0.0981229	1	0.0679013	1	0.0342873	1	-0.0445259	1	0.123793	1	0.0418634	1	-0.00880909	1	-0.199104	1	-0.112789	1	-0.0819383	2.11898e-13	-0.0628316	1	-0.18693	1	-0.106637	1	0.175001	1	0.0670996	1	0.0583932	1	-0.12829	1	-0.0108489	1	0.0184407	1	-0.0919303	1	-0.0587012	1	-0.0194492	0.0478508	FALSE	FALSE	-0.0967607	1.21513e-66	FALSE
AY036118	-0.303615	1	-0.257056	1	-0.144055	1	0.365191	1	-0.129681	1	-0.0629534	1	-0.186361	1	-0.398492	1	0.143946	1	-0.249782	2.51382e-55	-0.155266	1	-0.00116904	1	-0.360702	1	-0.325525	0.513	-0.115119	1	-0.428389	1	0.0704719	1	-0.214867	1	-0.149599	1	-0.0327964	1	-0.363954	1	-0.157132	6.79982e-32	FALSE	FALSE	-0.189026	3.95956e-119	FALSE
Azi2	0.0140035	1	-0.17129	1	-0.167328	1	0.159217	1	-0.140026	1	-0.0923313	1	-0.0516237	1	-0.159642	1	-0.154061	1	-0.0161169	3.75586e-11	-0.128207	1	-0.110552	1	0.0489075	1	0.06058	1	-0.11301	1	0.258672	1	0.125223	1	0.38786	1	0.000172455	1	-0.02748	1	0.250953	1	-0.00124185	0.24232	FALSE	FALSE	-0.0633951	6.51548e-86	FALSE
Azin1	-0.0562257	1	-0.117035	1	0.101829	1	0.0797095	1	-0.011545	1	0.0355524	1	-0.0116522	1	0.132649	1	0.142487	1	-0.0187742	4.50482e-07	-0.12215	1	-0.0512132	1	-0.0777927	1	0.159411	1	-0.0835599	1	0.0870841	1	-0.0236569	1	-0.257307	1	0.0285397	1	0.0666055	1	-0.0773044	1	-0.00354046	0.932178	FALSE	FALSE	0.0133493	1.81294e-28	FALSE
B230118H07Rik	-0.00965392	1	-0.121704	1	0.0903617	1	0.196215	1	0.179385	1	0.0834932	1	0.0251194	1	0.27612	1	0.166931	1	0.00179765	5.64556e-07	0.0627849	1	0.105054	1	-0.140304	1	-0.0716543	1	0.103025	1	-0.0368026	1	-0.00646399	1	0.0450505	1	0.054902	1	0.211825	1	0.0302102	1	0.0593187	0.940078	FALSE	FALSE	0.0961947	7.24929e-06	FALSE
B230219D22Rik	-0.060373	1	-0.0426907	1	-0.0471137	1	0.0988609	1	0.0214128	1	-0.0743722	1	0.0633181	1	-0.290523	1	-0.043526	1	-0.075188	8.97472e-08	0.0449344	1	-0.0921165	1	-0.017741	1	0.214778	1	0.172455	1	-0.141118	1	-0.230641	1	-0.00855217	1	-0.0148087	1	-0.216529	1	0.00806942	1	-0.0348316	0.855159	FALSE	FALSE	0.11249	1	FALSE
B230354K17Rik	-0.05286	1	0.117283	1	0.0460986	1	0.146347	1	-0.0810918	1	0.0474497	1	-0.0603318	1	-0.171073	1	-0.0183583	1	0.00527103	7.13153e-06	0.0550688	1	0.0047861	1	0.177799	1	0.051528	1	0.128849	1	0.11165	1	-0.136458	1	-0.0743113	1	-0.0113557	1	-0.063506	1	0.073722	1	0.0141193	0.989775	FALSE	FALSE	0.0248014	1.53926e-19	FALSE
B3galt6	-0.0390395	1	0.000151189	1	-0.135898	1	-0.0782114	1	0.178652	1	-0.151496	0.00752224	-0.05343	1	-0.0971338	1	0.0570233	1	-0.0223106	1.77549e-11	-0.0196637	1	-0.0359393	1	0.0158124	1	-0.0190549	1	-0.140191	1	0.0557797	1	-0.0263515	1	-0.00748788	1	-0.0184938	1	-0.05455	1	-0.0846971	1	-0.0322157	0.0403476	FALSE	FALSE	-0.0576897	6.84728e-83	FALSE
B3gat3	0.136395	1	-0.354832	1	0.0232017	1	-0.0659031	1	0.0494959	1	-0.0352008	1	0.0344819	1	-0.176197	1	0.065898	1	-0.0582379	1.51154e-14	-0.112126	1	-0.0386302	1	-0.126508	1	0.0326311	1	0.132269	1	0.113032	1	0.20189	1	0.0514644	1	-0.212869	1	-0.399832	1	0.0747496	1	-0.0316584	0.0171475	FALSE	FALSE	-0.0682063	7.24508e-78	FALSE
B4galnt1	0.0840143	1	-0.00806419	1	0.16921	1	-0.00997127	1	-0.100777	1	-0.0463072	1	-0.0289012	1	-0.0340617	1	0.0017945	1	-0.0143987	4.30747e-10	-0.0135336	1	-0.0386238	1	-0.0977612	1	0.102024	1	-0.0581704	1	0.198231	1	0.132586	1	0.028245	1	0.0280594	1	-0.174821	1	-0.0413724	1	0.00368572	0.422708	FALSE	FALSE	0.0200688	2.47934e-24	FALSE
B4galt1	0.084442	1	0.478866	1	-0.172409	1	-0.143856	1	0.0969024	1	0.111991	1	0.0727254	1	0.308362	1	0.0600117	1	-0.04888	5.08905e-11	0.0263316	1	0.0650348	1	-0.0767824	1	-0.0227189	1	-0.0311596	1	-0.220048	1	0.0186627	1	0.0620107	1	-0.0233105	1	-0.186707	1	-0.0149663	1	0.0211668	0.26173	FALSE	FALSE	0.000621055	1.01982e-31	FALSE
B4galt3	0.0850136	1	-0.160261	1	0.093327	1	0.219089	1	0.0386996	1	-0.0373296	1	-0.0826532	1	-0.174065	1	0.0144975	1	-0.0249059	1.47258e-13	-0.00035749	1	0.0283097	1	0.0906194	1	0.0112175	1	-0.0315189	1	-0.023283	1	0.245146	1	-0.0795198	1	-0.0791421	1	0.0818359	1	0.0961912	1	0.0148053	0.0418437	FALSE	FALSE	-0.0155378	2.14994e-52	FALSE
B4galt5	0.0243013	1	0.177462	1	0.232445	1	-0.0246115	1	-0.0488266	1	0.00700968	1	-0.079148	1	-0.0234855	1	-0.081941	1	-0.00347973	8.41138e-08	0.0248626	1	0.00849513	1	0.0905009	1	0.110752	1	-0.0336347	1	-0.171303	1	0.158979	1	-0.026027	1	0.0436702	1	0.0553253	1	0.00403214	1	0.0212085	0.851302	FALSE	FALSE	0.0446484	6.43838e-09	FALSE
B4galt6	0.308827	1	0.103092	1	0.0596847	1	0.0960178	1	-0.245485	1	-0.0176139	1	0.0467841	1	-0.182591	1	0.0407692	1	-0.102709	1.96517e-28	0.0297573	1	0.0803759	1	-0.00594655	1	0.05509	1	-0.256816	1	-0.214799	1	0.388128	1	-0.220498	1	-0.0227486	1	0.000294998	1	-0.0844534	1	-0.00689711	1.45336e-10	FALSE	FALSE	-0.00287654	1.25765e-42	FALSE
B4galt7	-0.00438913	1	0.00484629	1	-0.0362819	1	-0.00777416	1	0.0381218	1	-0.0300248	1	-0.12588	0.110633	-0.0336661	1	0.15412	1	-0.00130299	6.28461e-06	0.0447742	1	-0.0403955	1	-0.0107858	1	-0.048338	1	-0.0977643	1	0.136279	1	-0.0576505	1	-0.0669935	1	0.0106448	1	-0.132562	1	-0.131736	1	-0.020798	0.946776	FALSE	FALSE	0.0178696	7.62039e-21	FALSE
B4gat1	-0.0494862	1	-0.220088	1	0.0436999	1	0.00458762	1	-0.0647787	1	-0.0184846	1	-0.0199914	1	0.0261754	1	-0.0788242	1	-0.0179969	9.24695e-10	0.00299356	1	0.137233	1	-0.149517	1	0.0395169	1	0.0373226	1	-0.094269	1	0.212536	1	-0.190953	1	-0.0554179	1	-0.106928	1	0.0604754	1	-0.023914	0.488258	FALSE	FALSE	-0.0151417	1.1526e-50	FALSE
B930036N10Rik	-0.11022	1	-0.0668371	1	-0.00414475	1	-0.0916399	1	-0.233681	1	-0.0196548	1	0.0556573	1	0.0761342	1	-0.0227586	1	0.00658981	0.0026315	0.000108592	1	-0.100223	1	0.0124407	1	0.0663511	1	0.0282765	1	-0.104966	1	-0.112486	1	-0.154015	1	-0.0284029	1	-0.0924693	1	0.096436	1	-0.0380716	0.999999	FALSE	FALSE	0.00383176	1.16954e-27	FALSE
B9d1	0.1273	1	-0.22886	1	0.0627685	1	-0.158789	1	0.121303	1	-0.0302152	1	0.159649	1	-0.193971	1	-0.0999064	1	-0.0280338	7.14011e-12	-0.062161	1	0.0539601	1	0.163916	1	0.0566251	1	-0.0651726	1	0.112868	1	-0.0391261	1	0.0560731	1	-0.0762454	1	-0.0617806	1	-0.0691197	1	-0.00947229	0.153224	FALSE	FALSE	-0.0391389	2.07688e-66	FALSE
B9d2	0.0566947	1	0.0686432	1	0.126628	1	0.137644	1	-0.103468	1	0.0165951	1	0.0683658	1	-0.0296333	1	-0.0127643	1	0.062707	1	0.169822	1	0.172405	1	0.234897	1	-0.0340397	1	0.179053	1	0.0313177	1	-0.053951	1	0.157303	1	-0.0351198	1	-0.0244862	1	0.0399418	1	0.0585026	1	FALSE	FALSE	0.0565158	7.2593e-10	FALSE
Babam1	-0.209253	1	-0.195673	1	0.225374	1	0.0510566	1	0.104763	1	0.180319	1	0.0352248	1	0.27385	1	0.10561	1	0.0686379	1	0.0313592	1	-0.00379487	1	0.0962964	1	0.216371	1	-0.141917	1	0.208212	1	0.0175853	1	0.185395	1	-0.0852715	1	-0.0653284	1	-0.00141596	1	0.0522572	1	FALSE	FALSE	0.0426651	1.89549e-08	FALSE
Babam2	-0.0081973	1	-0.12535	1	-0.0355301	1	-0.085561	1	0.10249	1	0.15091	1	0.013457	1	-0.00405012	1	0.0566149	1	0.0920682	1	0.00529826	1	0.104433	1	0.119053	1	0.0286829	1	-0.0685504	1	0.118307	1	0.111743	1	0.0362549	1	-0.0617756	1	0.241799	1	0.164914	1	0.0455719	1	FALSE	FALSE	0.0750024	4.84396e-06	FALSE
Bace1	0.0702587	1	-0.0639628	1	0.0880054	1	-0.161445	1	0.377505	1	0.0536031	1	-0.0997408	1	0.0189502	1	0.135352	1	-0.0555694	1.16555e-13	0.133188	1	-0.161084	1	0.058106	1	0.163979	1	-0.00473974	1	0.0417285	1	0.152653	1	-0.0455177	1	0.0295109	1	-0.247787	1	0.0825467	1	0.0269305	0.0383394	FALSE	FALSE	-0.00714421	4.94017e-33	FALSE
Bach1	0.109455	1	0.0458931	1	0.0459588	1	0.283592	1	-0.116699	1	-0.0132105	1	0.0744375	1	-0.0623638	1	-0.0173422	1	-0.0110239	3.57085e-07	0.00502925	1	0.224554	1	-0.184403	1	-0.0398195	1	0.105106	1	-0.0910823	1	-0.00168071	1	0.119756	1	-0.0361498	1	0.0269324	1	-0.0930122	1	0.017806	0.923331	FALSE	FALSE	0.0339729	3.84745e-19	FALSE
Bad	0.0939587	1	0.0384718	1	0.180556	1	-0.150041	1	0.154563	1	0.0838927	1	0.157208	1	0.0474792	1	-0.0058446	1	0.066958	1	0.0269686	1	-0.0706101	1	0.105964	1	0.0127285	1	0.102671	1	-0.488353	1	0.104159	1	0.449957	1	-0.0515252	1	0.227282	1	0.0104902	1	0.052235	1	FALSE	FALSE	0.048201	3.51591e-14	FALSE
Bag1	-0.00678374	1	0.219186	1	-0.0130293	1	-0.101057	1	0.335018	1	0.0442885	1	0.0437935	1	0.0209506	1	0.0902951	1	-0.00109455	1	-0.117257	1	-0.285915	1	0.121283	1	0.109772	1	-0.097799	1	-0.0853924	1	0.116213	1	0.312778	1	-0.124222	1	0.0389587	1	0.0493324	1	0.0318723	1	FALSE	FALSE	-0.194065	7.28839e-79	FALSE
Bag2	-0.077792	1	-0.213406	1	0.205865	1	-0.193816	1	0.216628	1	-0.122584	1	-0.0932171	1	0.0664015	1	-0.255795	1	0.033029	0.0728664	-0.0588453	1	-0.00537268	1	-0.0992687	1	-0.0668084	1	0.0878003	1	0.127447	1	0.230861	1	-0.00472279	1	0.0848218	1	0.128919	1	0.00571741	1	-0.000197062	1	FALSE	FALSE	-0.0563744	6.7489e-51	FALSE
Bag3	0.242096	1	-0.117018	1	-0.088678	1	-0.0171755	1	-0.0134867	1	-0.0451258	1	0.0215254	1	-0.070233	1	-0.0004558	1	0.0113624	9.17556e-06	0.0359626	1	0.0101355	1	0.08063	1	-0.0544469	1	-0.176299	1	-0.259662	1	-0.199524	1	-0.00477932	1	0.0751534	1	-0.00174706	1	-0.0744025	1	-0.03077	0.991797	FALSE	FALSE	0.00200347	6.8433e-33	FALSE
Bag4	-0.0405421	1	-0.00148306	1	-0.148915	1	0.0117595	1	-0.0231938	1	0.077278	1	-0.0438481	1	-0.0672293	1	0.0683636	1	-0.000762334	6.82661e-08	-0.046099	1	0.0419244	1	-0.196757	1	-0.0205535	1	0.0166327	1	0.0621507	1	-0.0157662	1	-0.157039	1	-0.0627123	1	-0.0518595	1	-0.0232727	1	-0.0296154	0.838493	FALSE	FALSE	-0.020386	5.7676e-54	FALSE
Bag5	-0.177994	1	-0.119215	1	-0.220284	1	-0.0173161	1	0.116663	1	0.00282471	1	0.0747372	1	-0.0351835	1	-0.00217171	1	-0.0118968	2.23134e-09	0.0197715	1	0.249786	1	0.0443055	1	0.026525	1	-0.154916	1	0.141827	1	0.227265	1	3.29153e-05	1	-0.0354286	1	-0.0125135	1	0.0549926	1	0.0081815	0.56614	FALSE	FALSE	0.0365737	1.54458e-23	FALSE
Bag6	-0.177029	1	0.162356	1	0.135329	1	-0.0267163	1	0.161744	1	0.0515664	1	0.104321	1	-0.246106	1	-0.118225	1	-0.00626555	8.34752e-06	0.0258121	1	-0.139524	1	0.00840309	1	0.045186	1	-0.153439	1	0.00308997	1	0.0952314	1	-0.12325	1	0.049382	1	-0.142816	1	0.21466	1	-0.00363282	0.99108	FALSE	FALSE	0.00388388	2.12845e-27	FALSE
Bahcc1	-0.0907482	1	-0.034647	1	-0.130967	1	-0.044439	1	0.215992	1	0.0263405	1	0.0106767	1	0.0276805	1	-0.0175479	1	0.0131404	0.0338709	0.00568885	1	-0.00283217	1	-0.0217213	1	0.100277	1	-0.00168287	1	0.0161446	1	0.147143	1	-0.0220989	1	0.0843391	1	-0.0197921	1	0.087589	1	0.0165969	1	FALSE	FALSE	0.0438995	0.000993515	FALSE
Baiap2	0.10397	1	0.082752	1	0.319833	1	0.145395	1	0.0660797	1	-0.0404877	1	0.119211	1	0.0925941	1	0.102175	1	0.105572	1	0.0443734	1	-0.0318215	1	0.113358	1	0.104799	1	0.117245	1	-0.118691	1	-0.0745703	1	0.130574	1	0.226119	1	0.220195	1	0.116619	1	0.092633	1	FALSE	FALSE	0.0995677	1	FALSE
Bak1	0.234664	1	-0.473589	1	0.121575	1	-0.295454	1	0.057583	1	0.000661099	1	-0.0709251	1	0.141094	1	0.0649117	1	0.0276055	0.128154	-0.139573	1	-0.0358231	1	-0.0596649	1	-0.140945	1	0.10198	1	-0.0299142	1	-0.0176864	1	0.102395	1	-0.107861	1	-0.181313	1	0.0428997	1	-0.0313038	1	FALSE	FALSE	-0.0674977	8.56875e-60	FALSE
Banf1	-0.0250971	1	-0.301697	1	-0.128875	1	0.0231357	1	0.125092	1	-0.0910716	1	-0.0237789	1	-0.282289	1	0.0430019	1	0.02364	1	0.0515693	1	0.0291881	1	0.128368	1	0.00405337	1	0.0464242	1	0.134311	1	0.174116	1	0.145668	1	-0.161831	1	-0.0147316	1	-0.117509	1	-0.0103959	1	FALSE	FALSE	-0.0154046	0.00573878	FALSE
Banp	-0.0929932	1	-0.0695389	1	-0.14	1	0.071466	1	-0.101297	1	-0.0111577	1	-0.138889	1	-0.0325626	1	0.109244	1	-0.0667916	2.08107e-25	-0.0212547	1	-0.144881	1	-0.0254829	1	-0.09825	0.102495	-0.122814	1	0.0849753	1	-0.190981	1	-0.25967	1	-0.074284	1	-0.356781	0.59374	0.044619	1	-0.0779678	2.50156e-09	FALSE	FALSE	-0.0702084	2.97223e-107	FALSE
Bap1	0.0648809	1	-0.119327	1	0.0209774	1	-0.0833454	1	0.268119	1	-0.0602084	1	-0.0202462	1	-0.0770887	1	-0.0207382	1	-0.0129249	1.04735e-06	-0.0415162	1	-0.01805	1	-0.0992993	1	0.00191884	1	-0.0037825	1	-0.0470412	1	0.0324021	1	-0.0640206	1	-0.0709292	1	0.042887	1	-0.0215948	1	-0.0156632	0.958369	FALSE	FALSE	-0.012316	4.73541e-41	FALSE
Bax	0.21795	1	0.143087	1	0.294459	1	-0.0382149	1	-0.0302016	1	-0.0895611	1	0.0480661	1	0.16014	1	0.120188	1	0.00712426	1	0.213351	1	0.0419664	1	0.0235158	1	-0.113479	1	0.0892953	1	-0.0229436	1	0.138249	1	0.286213	1	-0.109378	1	-0.0363965	1	0.0159658	1	0.0647332	1	FALSE	FALSE	0.1706	4.76808e-21	FALSE
Baz1a	-0.275687	1	-0.0990592	1	0.0214903	1	-0.055082	1	-0.445423	1	-0.160104	1	-0.291113	1	-0.353506	1	-0.232989	1	-0.141276	5.60982e-16	-0.150758	1	-0.286313	1	-0.291249	1	-0.0826434	1	0.141979	1	-0.016449	1	0.349291	1	0.123296	1	0.0700728	1	0.00516276	1	-0.261089	1	-0.115783	0.00407186	FALSE	FALSE	-0.144556	3.12812e-72	FALSE
Baz1b	-0.286154	1	-0.0823783	1	-0.023871	1	0.127499	1	-0.106597	1	-0.0360746	1	-0.0754101	1	-0.211517	1	-0.234559	1	-0.0902977	2.68478e-06	0.076154	1	-0.0749267	1	0.103393	1	0.0798601	1	0.180201	1	0.280025	1	0.312884	1	-0.08655	1	0.0180924	1	-0.1313	1	0.0650576	1	-0.00935571	0.977889	FALSE	FALSE	-0.0301444	3.43257e-13	FALSE
Baz2a	0.0700674	1	-0.113824	1	-0.0221383	1	0.135053	1	-0.183698	1	0.0189972	1	-0.00651683	1	-0.0499509	1	0.0373683	1	-0.000977066	2.50403e-08	0.00956843	1	0.0788112	1	-0.0257498	1	-0.00874754	1	0.0157352	1	0.0361634	1	-0.0934911	1	0.0656196	1	-0.0137601	1	0.0656047	1	-0.075617	1	-0.00292769	0.769226	FALSE	FALSE	-0.00482439	6.16294e-47	FALSE
Baz2b	-0.114348	1	0.088378	1	-0.0944758	1	0.00361787	1	0.176905	1	0.217513	1	0.0865838	1	-0.0648746	1	0.165534	1	-0.0725378	1.4381e-12	0.127202	1	0.27836	1	-0.0123713	1	0.174718	1	0.180087	1	0.0567429	1	-0.228667	1	-0.101776	1	-0.0779743	1	-0.204811	1	0.0540764	1	0.0303754	0.0930015	FALSE	FALSE	0.088575	0.0393221	FALSE
Bbc3	0.0515124	1	-0.0845409	1	-0.109341	1	0.218783	1	-0.0126131	1	-0.0896609	0.0804433	0.0761192	1	-0.205803	1	0.018927	1	-0.0889169	5.89968e-29	-0.0017764	1	-0.0425229	1	-0.0243071	1	-0.0803222	0.16471	0.102458	1	-0.263792	1	-0.136001	1	-0.162453	1	-0.238939	1	-0.0967048	1	-0.00232982	1	-0.0558202	2.94456e-12	FALSE	FALSE	-0.030082	7.28599e-66	FALSE
Bbip1	0.086963	1	-0.0186995	1	0.00910815	1	-0.441003	0.00977145	0.0208194	1	-0.0497076	1	0.108469	1	0.119443	1	0.0844628	1	-0.0345453	3.65041e-14	0.0439745	1	-0.132943	1	-0.216166	1	-0.158484	1	-0.227729	1	-0.309898	1	-0.00489076	1	-0.0232622	1	-0.2169	1	-0.225379	1	0.198624	1	-0.066083	0.00330065	FALSE	FALSE	-0.0433149	3.39126e-65	FALSE
Bbs7	-0.0983076	1	-0.128267	1	0.0223909	1	-0.0528777	1	-0.0234333	1	-0.0247797	1	-0.0235484	1	-0.126768	1	-0.0410428	1	-0.00554605	8.78771e-11	0.0253111	1	-0.0143807	1	0.128103	1	-0.0784623	1	-0.0164138	1	-0.0650627	1	0.119016	1	-0.00125269	1	0.000691325	1	-0.172608	1	-0.00813786	1	-0.0278751	0.298989	FALSE	FALSE	-0.00932635	2.71379e-41	FALSE
Bbx	0.00373535	1	-0.174463	1	0.0688946	1	0.295899	1	0.217435	1	0.0338888	1	-0.0106936	1	-0.177132	1	-0.0583813	1	0.00964743	1	0.0852958	1	0.060965	1	-0.145148	1	0.0177953	1	0.0917056	1	0.232141	1	0.452946	1	-0.0629778	1	0.0666147	1	-0.0289086	1	0.124693	1	0.0525691	1	FALSE	FALSE	0.0148513	9.59367e-12	FALSE
BC003331	0.154437	1	-0.118727	1	-0.163404	1	0.00675016	1	-0.177075	1	0.113932	1	0.0191335	1	-0.0114881	1	0.00721002	1	0.0148264	0.00126029	0.108114	1	-0.0422777	1	0.24665	1	0.0765666	1	0.00726532	1	0.0526584	1	0.107457	1	0.135684	1	0.0481117	1	0.13582	1	-0.0817755	1	0.0304699	0.999993	FALSE	FALSE	0.0320953	1.23352e-20	FALSE
BC003965	-0.329921	1	0.103321	1	-0.105387	1	-0.116928	1	-0.0603913	1	-0.106458	1	0.0260299	1	0.176196	1	0.00819589	1	-0.00335168	0.000662713	-0.0921475	1	-0.0453998	1	-0.143172	1	-0.162262	1	-0.0993634	1	0.122628	1	-0.0288935	1	0.0434284	1	0.0783834	1	-0.123773	1	-0.195489	1	-0.0502265	0.999973	FALSE	FALSE	-0.10325	4.90229e-73	FALSE
BC004004	0.0365805	1	-0.176121	1	0.185959	1	-0.0591485	1	-0.0887438	1	-0.0399435	1	0.0559296	1	-0.252782	1	0.0074224	1	0.0103749	2.42171e-05	0.0801947	1	0.0186385	1	0.253087	1	0.141212	1	0.041698	1	-0.0834149	1	0.0238964	1	-0.124343	1	-0.0189155	1	0.108873	1	0.0930444	1	0.0101666	0.996803	FALSE	FALSE	-0.0226006	3.53208e-43	FALSE
BC005537	-0.178519	1	-0.0758407	1	0.142831	1	-0.267632	1	-0.149841	1	0.0351881	1	-0.0362055	1	0.0231052	1	-0.0114213	1	-0.01283	1.03808e-07	0.0887809	1	0.0618433	1	0.00911287	1	0.116394	1	0.00248347	1	-0.00637045	1	-0.0296469	1	-0.177697	1	0.174841	1	-0.173782	1	0.0985313	1	-0.0174607	0.863609	FALSE	FALSE	0.0466585	2.35494e-14	FALSE
BC005561	-0.0728205	1	-0.0466176	1	-0.000256874	1	0.0321754	1	-0.170975	1	-0.0164227	1	0.0780573	1	0.175118	1	0.0256837	1	-0.0437274	8.97228e-12	0.0899246	1	-0.0479863	1	0.00953978	1	-0.0595313	1	0.0154735	1	-0.0617116	1	0.139388	1	-0.0629111	1	0.0356066	1	0.00654494	1	-0.0307186	1	-0.000293664	0.163795	FALSE	FALSE	0.0282546	1.46096e-20	FALSE
BC005624	0.0215336	1	-0.0134011	1	0.090796	1	0.129114	1	-0.131272	1	0.0103691	1	-0.05924	1	-0.00152953	1	-0.160255	1	0.00795825	1.9158e-05	0.0726593	1	-0.0964677	1	0.0121763	1	0.095918	1	0.00665701	1	-0.165726	1	0.312807	1	0.0304708	1	-0.0080093	1	-0.0872454	1	0.1375	1	0.00975307	0.995928	FALSE	FALSE	0.103477	0.230392	FALSE
BC017643	0.139883	1	-0.0999413	1	0.116415	1	0.102542	1	0.110231	1	-0.00862735	1	0.128872	1	-0.191459	1	-0.0527029	1	-0.0162831	2.55085e-09	-0.0384939	1	-0.0559386	1	0.09501	1	-0.0499766	1	-0.0300771	1	-0.00871964	1	-0.0215974	1	-0.0300979	1	0.0591871	1	-0.0693948	1	-0.0185294	1	0.00287141	0.578021	FALSE	FALSE	-0.0264312	5.27212e-58	FALSE
BC029722	0.100695	1	-0.0164296	1	-0.025735	1	-0.168004	1	-0.00476358	1	-0.00261814	1	0.0501225	1	-0.0516522	1	-0.0515735	1	0.0140463	0.000757229	0.0661339	1	0.0377746	1	0.0730687	1	0.0219731	1	0.0329211	1	-0.0337958	1	0.203209	1	0.0969619	1	0.0707754	1	0.0774273	1	-0.0322284	1	0.0218242	0.999979	FALSE	FALSE	0.0472747	2.08973e-08	FALSE
BC031181	-0.101259	1	-0.0172598	1	0.0144818	1	-0.0168494	1	-0.0703188	1	-0.0515694	1	-0.0528591	1	-0.297272	1	0.0912352	1	-0.0637155	1.32518e-11	-0.00996828	1	0.0469331	1	0.101077	1	0.0137912	1	0.0512047	1	0.0466498	1	0.00166485	1	-0.00996046	1	-0.0485783	1	0.053336	1	-0.123578	1	-0.0210865	0.183069	FALSE	FALSE	-0.0176566	1.70183e-32	FALSE
Bcap29	0.241749	1	0.0513396	1	-0.0359758	1	-0.0621264	1	0.244089	1	0.0961428	1	-0.00122306	1	0.113908	1	-0.0665627	1	-0.0419408	1.75767e-13	-0.0871316	1	-0.309801	0.171598	-0.115223	1	0.0374327	1	-0.15648	1	0.193918	1	0.26785	1	-0.154363	1	-0.0161884	1	-0.0382595	1	-0.146607	1	0.000692732	0.02269	FALSE	FALSE	-0.0405132	4.0466e-59	FALSE
Bcap31	0.100324	1	0.117309	1	0.0379765	1	-0.0130387	1	0.264283	1	0.0341381	1	-0.28184	1	0.412158	1	0.0505274	1	0.131572	1	0.154511	1	0.242947	1	0.404859	1	0.141394	1	0.121196	1	0.355873	1	0.210897	1	0.148578	1	0.220826	1	0.0806336	1	0.182614	1	0.148464	1	FALSE	FALSE	0.195607	5.03175e-21	FALSE
Bcar1	0.00544037	1	-0.253404	1	-0.0491009	1	-0.321985	1	-0.0217783	1	-0.0599714	1	-0.0928224	1	-0.0569489	1	0.0565724	1	-0.0535164	1.26443e-17	-0.0613687	1	0.130602	1	-0.0129217	1	-0.114921	1	0.0957867	1	-0.148393	1	0.115797	1	-0.224089	1	-0.109405	1	-0.132853	1	-0.0873559	1	-0.0665064	0.000645977	FALSE	FALSE	-0.0715132	5.61624e-89	FALSE
Bcas2	-0.0886627	1	-0.307471	1	-0.00736741	1	-0.0790766	1	-0.0528865	1	-0.105802	1	-0.131032	1	-0.16262	1	-0.229246	1	-0.111931	2.55282e-07	-0.140519	1	-0.0825963	1	-0.320056	1	-0.284438	1	-0.0475955	1	-0.00609828	1	-0.314618	1	0.0437693	1	-0.00462326	1	-0.209598	1	-0.160465	1	-0.133473	0.909237	FALSE	FALSE	-0.124817	1.43384e-38	FALSE
Bcas3	0.0430335	1	-0.0549904	1	0.033085	1	0.323617	1	0.171198	1	0.0703716	1	0.00294305	1	0.283666	1	0.0811461	1	0.0135961	8.72804e-05	0.0683233	1	0.098409	1	0.00319752	1	0.0727397	1	0.0967503	1	0.0475077	1	0.0769699	1	0.150757	1	-0.00521353	1	-0.00799384	1	0.0607614	1	0.0776131	0.999296	FALSE	FALSE	0.0363922	1.01485e-11	FALSE
Bcat1	-0.150736	1	-0.14	1	0.00832972	1	0.168281	1	-0.237262	1	-0.116364	0.486817	-0.0634617	1	-0.163021	1	-0.142054	1	0.000805169	0.000929617	-0.0685143	1	-0.0887984	1	-0.0568201	1	-0.0462974	1	-0.0445171	1	0.0235272	1	-0.0915636	1	0.0115537	1	-0.113695	1	-0.057081	1	-0.00263031	1	-0.0652533	0.999944	FALSE	FALSE	-0.105238	1.35057e-118	FALSE
Bcat2	0.0214382	1	-0.23182	1	-0.0361386	1	0.249098	1	0.319168	1	-0.0392178	1	-0.151661	1	-0.105518	1	-0.188171	0.563469	0.0305743	0.197443	0.0121129	1	-0.0255948	1	-0.0910887	1	0.0715613	1	-0.0450291	1	0.0733919	1	0.110947	1	0.0477958	1	-0.150333	1	0.144842	1	-0.0806729	1	-0.00306259	1	FALSE	FALSE	0.0016736	3.31955e-36	FALSE
Bccip	-0.0273407	1	-0.311348	1	-0.106917	1	-0.128982	1	-0.135396	1	-0.122103	1	-0.0465395	1	0.0642224	1	-0.211833	1	-0.0574823	4.45398e-11	0.00663131	1	-0.171677	1	0.0683368	1	-0.0817667	1	0.0212994	1	-0.0304695	1	0.14081	1	-0.258609	1	-0.0980444	1	-0.181331	1	-0.0474097	1	-0.0817118	0.253095	FALSE	FALSE	-0.0700313	9.52641e-61	FALSE
Bckdha	0.19938	1	-0.035575	1	0.023432	1	0.028324	1	0.285393	1	0.0508484	1	0.124167	1	0.0015011	1	0.194247	1	0.056274	1	0.050124	1	0.113483	1	0.0135223	1	0.0510944	1	0.0985882	1	-0.0691959	1	-0.0532711	1	0.073949	1	0.0225287	1	0.0896103	1	-0.070492	1	0.0594254	1	FALSE	FALSE	0.0878664	0.675389	FALSE
Bckdhb	-0.131538	1	-0.0964688	1	0.0529325	1	-0.029763	1	0.0654206	1	-0.0728903	0.311248	-0.0876332	1	-0.109831	1	0.0805833	1	0.000113075	2.02788e-11	-0.00159788	1	0.000737341	1	0.142901	1	-0.0677146	1	-0.159731	1	-0.204315	1	-0.00910503	1	0.0616228	1	-0.0743492	1	0.161889	1	-0.0581707	1	-0.025567	0.147734	FALSE	FALSE	-0.00765962	5.48327e-49	FALSE
Bckdk	0.140338	1	-0.281729	1	-0.0915721	1	0.140906	1	-0.00127742	1	-0.0180576	1	0.128542	1	0.0871552	1	-0.0756491	1	0.0520478	1	0.165534	1	0.0869344	1	0.188175	1	0.0498497	1	0.0858794	1	-0.183333	1	0.171976	1	-0.041456	1	-0.111634	1	0.0829239	1	0.0335826	1	0.0290065	1	FALSE	FALSE	0.0731578	3.59368e-08	FALSE
Bcl10	-0.143661	1	0.00738889	1	-0.0125215	1	0.0959458	1	0.216954	1	-0.0740581	1	0.192535	1	-0.246835	1	0.0151595	1	-0.0194613	0.000420997	-0.00636078	1	-0.0865391	1	-0.017924	1	0.0188892	1	-0.160975	1	-0.24427	1	0.00686902	1	0.101544	1	0.00548869	1	-0.367761	1	-0.0110769	1	-0.0347938	0.999937	FALSE	FALSE	-0.0846111	3.6212e-44	FALSE
Bcl2	0.135694	1	-0.0908992	1	0.0249506	1	0.053978	1	-0.0549445	1	0.0714655	1	-0.0142581	1	0.172609	1	0.105824	1	-0.015293	7.62544e-09	0.0205001	1	-0.0476151	1	0.046202	1	0.0326036	1	-0.0503577	1	0.157725	1	-0.0676801	1	-0.0875631	1	0.135426	1	-0.115195	1	-0.0952904	1	0.0151372	0.673618	FALSE	FALSE	0.0185607	3.55858e-21	FALSE
Bcl2l1	-0.0374003	1	0.12778	1	0.161983	1	0.096598	1	0.0626932	1	0.0437832	1	0.103219	1	0.314216	1	-0.0195518	1	0.0507848	1	-0.00971508	1	0.191409	1	0.213339	1	0.146213	1	0.137785	1	0.129564	1	0.087862	1	0.121351	1	0.112916	1	-0.0210369	1	0.121462	1	0.101679	1	FALSE	FALSE	0.0663053	0.000208198	FALSE
Bcl2l11	0.143116	1	-0.0588621	1	0.0156707	1	0.343029	1	0.101672	1	0.0628905	1	0.235883	1	0.0710159	1	0.0262278	1	0.0380518	1	0.110095	1	-0.082502	1	0.0874238	1	0.102703	1	0.146246	1	0.208314	1	0.146513	1	0.252881	1	0.0211036	1	-0.0867205	1	0.212699	1	0.0998786	1	FALSE	FALSE	0.163803	1	FALSE
Bcl2l13	0.0479254	1	-0.0904889	1	-0.0920094	1	-0.137381	1	-0.146263	1	0.0748286	1	-0.0214265	1	0.0936079	1	-0.0374449	1	-0.0390319	4.35629e-16	-0.044666	1	0.00258866	1	0.0236654	1	0.00455687	1	-0.0275098	1	0.104267	1	-0.148023	1	-0.168552	1	0.0226874	1	0.0899358	1	0.0127857	1	-0.0226642	0.00362252	FALSE	FALSE	-0.0197836	6.82213e-51	FALSE
Bcl7b	-0.0976124	1	0.0601402	1	0.232663	1	-0.105149	1	0.0014282	1	0.0556665	1	-0.0629234	1	-0.246532	1	0.0524579	1	0.0680698	1	0.0609819	1	-0.110435	1	0.11217	1	0.148487	1	-0.113445	1	0.144325	1	0.337755	1	0.169301	1	0.154877	1	-0.0847486	1	0.213559	1	0.0471921	1	FALSE	FALSE	0.025076	1.0744e-20	FALSE
Bcl7c	0.192533	1	-0.150059	1	-0.0452364	1	-0.0829978	1	0.183079	1	-0.161368	1	-0.0772089	1	-0.26069	1	-0.106623	1	0.0608393	1	-0.212608	1	0.0812117	1	0.0611473	1	0.00892673	1	-0.29025	1	0.279146	1	0.0310955	1	-0.12673	1	0.0276103	1	0.13883	1	-0.111865	1	-0.0267246	1	FALSE	FALSE	0.0503669	1	FALSE
Bcl9	0.0104505	1	0.219737	1	-0.0443354	1	-0.0394979	1	-0.0733237	1	0.0149828	1	0.0427159	1	0.269592	1	0.024697	1	-0.0445708	6.85405e-16	0.045292	1	0.156751	1	-0.0268058	1	-0.121025	1	-0.0180465	1	-0.0903003	1	0.010316	1	0.0815375	1	0.0584428	1	0.00372203	1	-0.0083347	1	0.022476	0.00446421	FALSE	FALSE	-0.0176712	4.93285e-49	FALSE
Bcl9l	0.143171	1	-0.0827418	1	0.0535165	1	0.19817	1	0.0917426	1	0.0559836	1	0.116272	1	0.45069	1	0.0220205	1	0.064239	1	0.0455344	1	0.147717	1	0.0228291	1	0.152379	1	0.145041	1	0.465038	1	-0.0311333	1	0.045374	1	0.202716	1	0.193739	1	-0.00884726	1	0.118736	1	FALSE	FALSE	0.102553	0.000646533	FALSE
Bclaf1	0.209562	1	-0.100993	1	0.0825963	1	-0.0166968	1	-0.0912111	1	0.189453	1	0.0862946	1	-0.171736	1	-0.0373798	1	0.0221691	1	0.223241	1	-0.198632	1	0.123614	1	0.115478	1	0.266718	1	0.202947	1	0.230492	1	0.0814327	1	-0.0531476	1	0.139922	1	0.0241687	1	0.063252	1	FALSE	FALSE	0.080131	1	FALSE
Bclaf3	0.163996	1	-0.198726	1	-0.0106	1	-0.140701	1	-0.00340449	1	-0.00523432	1	-0.0700122	0.998393	-0.0157331	1	0.0526213	1	-0.0817661	1.03384e-16	-0.0434498	1	0.0413595	1	-0.0680876	1	-0.0684566	1	-0.0150893	1	-0.0912749	1	0.0402092	1	0.121476	1	0.0318472	1	-0.0117897	1	-0.0423105	1	-0.0197679	0.00183119	FALSE	FALSE	-0.0138726	1.54653e-44	FALSE
Bcor	0.0976887	1	0.170973	1	0.0119518	1	-0.0225588	1	-0.12123	1	0.0439715	1	0.0285817	1	-0.104179	1	-0.0398491	1	-0.0112665	1.84001e-05	0.0398486	1	-0.00261771	1	0.0817163	1	-0.0323252	1	0.115407	1	-0.0603321	1	-0.028503	1	-0.0587595	1	-0.0261453	1	0.0105379	1	-0.0375263	1	0.00263735	0.995759	FALSE	FALSE	-0.00356961	1.0478e-28	FALSE
Bcr	-0.0175459	1	-0.0545281	1	0.0768402	1	-0.0538161	1	-0.11994	1	0.00560026	1	-0.00326622	1	0.145583	1	0.00515399	1	-0.0248593	1.75612e-10	-0.108914	1	-0.0596041	1	0.102908	1	-0.0188694	1	-0.0166588	1	-0.0178813	1	0.216237	1	-0.131841	1	0.0775325	1	-0.0410832	1	0.158357	1	0.00568591	0.35031	FALSE	FALSE	-0.0369295	9.75469e-60	FALSE
Bdp1	-0.00256746	1	-0.198311	1	0.0942489	1	-0.0960935	1	-0.114034	1	0.152523	1	0.0225656	1	-0.103882	1	-0.192009	1	0.00214949	0.0997768	0.0645793	1	-0.0973015	1	0.015352	1	-0.0153403	1	0.0513932	1	-0.0309126	1	0.0519216	1	-0.173102	1	0.189373	1	0.0177897	1	-0.000870805	1	-0.0172632	1	FALSE	FALSE	0.033321	2.73601e-08	FALSE
Becn1	0.0318363	1	0.02372	1	-0.175382	1	0.0788272	1	0.180067	1	-0.0175503	1	0.0744777	1	-0.144593	1	0.0862793	1	-0.0300203	1.03222e-12	0.0616268	1	0.0344639	1	-0.132994	1	0.0158595	1	0.0618761	1	0.146673	1	0.226964	1	0.035157	1	-0.0264568	1	0.0979488	1	0.156775	1	0.0374074	0.0833187	FALSE	FALSE	0.0554997	1.11934e-13	FALSE
Bet1	0.0744773	1	-0.0848188	1	0.0440434	1	-0.019445	1	-0.00342406	1	-0.0249338	1	-0.094327	1	0.174702	1	-0.0898623	1	-0.0271586	7.15826e-09	-0.0748969	1	-0.0319448	1	0.171216	1	-0.149093	1	0.0251278	1	0.0464	1	-0.169555	1	-0.00393227	1	-0.0604312	1	-0.0636902	1	0.0703491	1	-0.0138665	0.668235	FALSE	FALSE	-0.0524824	7.51694e-54	FALSE
Bex3	0.129005	1	-0.498776	1	0.0944408	1	-0.374063	1	0.126095	1	0.00176748	1	-0.376285	0.168674	0.0962696	1	-0.144632	1	0.03707	1	0.0900527	1	0.209641	1	0.121558	1	0.0918577	1	0.0972249	1	0.204393	1	0.0112007	1	0.363623	1	-0.018406	1	0.00624173	1	-0.252092	1	0.000770829	1	FALSE	FALSE	-0.0857282	1.99582e-12	FALSE
Bfar	-0.0478932	1	-0.00376616	1	0.137813	1	0.0919643	1	0.0609541	1	-0.00497361	1	-0.0160651	1	-0.178302	1	-0.102282	1	-0.0210509	3.05157e-11	0.0381661	1	0.0521894	1	-0.0582594	1	0.028702	1	0.0343087	1	-0.102727	1	0.0318401	1	-0.00540632	1	0.0738445	1	0.0111714	1	-0.0446159	1	-0.00116136	0.229602	FALSE	FALSE	-0.00177704	8.76826e-44	FALSE
Bhlhb9	0.0401219	1	0.0511377	1	0.0232679	1	0.018299	1	-0.0779833	1	0.0146966	1	-0.0640782	1	0.0138803	1	-0.0490053	1	-0.0151817	1.20765e-10	-0.0543585	1	0.0329907	1	-0.0283783	1	0.00570524	1	0.0348061	1	0.106562	1	0.0823694	1	-0.0545861	1	0.110023	1	-0.0557925	1	-0.111867	1	0.00107759	0.322011	FALSE	FALSE	-0.0287368	6.51796e-59	FALSE
Bhlhe40	-0.00846546	1	0.158598	1	-0.00659228	1	0.058838	1	0.0423066	1	0.151005	1	-0.0626839	1	0.319366	1	-0.0751472	1	-0.174268	2.68989e-09	0.00100866	1	-0.179032	1	-0.130077	1	0.368063	1	0.0153757	1	-0.543491	1	0.0052779	1	-0.00630224	1	0.323846	1	-0.640515	1	-0.142515	1	-0.0250192	0.58273	FALSE	FALSE	0.0770424	1	FALSE
Bicd2	0.119571	1	-0.0116284	1	-0.14535	1	-0.333337	1	-0.338465	1	0.00544087	1	-0.0433398	1	0.0907573	1	-0.0339402	1	-0.0693776	2.3013e-14	0.00481963	1	-0.0125092	1	-0.181172	1	-0.0530884	1	0.0405277	1	0.0795248	1	-0.020844	1	-0.259669	1	-0.158882	1	-0.173607	1	-0.1216	1	-0.0769604	0.0203525	FALSE	FALSE	0.000432931	6.59422e-34	FALSE
Bid	0.230792	1	-0.0329598	1	0.0363916	1	0.0387321	1	0.0871715	1	0.0187382	1	-0.0655826	1	0.166093	1	0.0744759	1	0.0333945	1	-0.0236924	1	-0.0553352	1	0.0483642	1	-0.0563353	1	0.106907	1	0.126714	1	0.099521	1	0.0787256	1	0.12047	1	0.0444672	1	0.039664	1	0.0531769	1	FALSE	FALSE	0.0082588	3.23715e-22	FALSE
Bin1	0.173109	1	0.160416	1	0.163525	1	0.107392	1	0.0324902	1	-0.0868375	1	0.016833	1	0.243345	1	-0.0480888	1	0.160749	1	-0.109013	1	-0.0408111	1	0.000978241	1	0.121117	1	0.222225	1	0.194132	1	-0.00993069	1	-0.0221106	1	-0.146855	1	-0.0380606	1	-0.0793945	1	0.0483434	1	FALSE	FALSE	0.0964893	1	FALSE
Bin3	0.0369919	1	0.0143906	1	0.120335	1	-0.104557	1	-0.026824	1	-0.00171716	1	-0.017065	1	0.0504011	1	-0.0655743	1	-0.00776461	1.00226e-07	-0.0414318	1	0.0355697	1	0.0375531	1	0.0358643	1	-0.0608576	1	0.130503	1	-0.0346656	1	0.106355	1	0.0769271	1	0.0256909	1	0.0524659	1	0.0172662	0.861597	FALSE	FALSE	-0.0023856	1.16355e-40	FALSE
Birc2	-0.0703132	1	-0.0175443	1	0.0576221	1	0.00524762	1	0.149603	1	0.0163947	1	0.0268218	1	0.181692	1	0.0559136	1	-0.0171112	6.94857e-11	0.00955071	1	0.028248	1	0.0469681	1	-0.0194406	1	0.246203	1	-0.0042705	1	-0.162125	1	0.0232489	1	0.10042	1	-0.176293	1	0.141462	1	0.0296332	0.282608	FALSE	FALSE	0.0246494	3.2963e-25	FALSE
Birc3	0.379883	1	0.0940808	1	0.0193893	1	0.0963816	1	-0.0712057	1	0.125481	1	-0.0788499	1	0.0994829	1	0.0835276	1	0.0461347	1	0.0803255	1	0.0993559	1	-0.00319442	1	0.148472	1	-0.0877936	1	-0.0609992	1	0.0640721	1	0.0782556	1	0.0519221	1	-0.160803	1	0.0814395	1	0.0516837	1	FALSE	FALSE	0.0503987	6.7535e-08	FALSE
Birc5	-0.404898	1	-0.262639	1	-0.310839	1	-0.102276	1	0.085544	1	-0.154911	1	0.00897443	1	-0.484234	1	-0.0661197	1	0.164719	1	-0.0673939	1	-0.407347	1	0.336833	1	-0.317379	1	0.0425152	1	-0.360996	1	0.0461111	1	-0.431079	1	-0.0898352	1	-0.0284194	1	-0.405565	1	-0.152821	1	FALSE	FALSE	-0.125636	1.25815e-08	FALSE
Birc6	0.211707	1	-0.122765	1	-0.0586337	1	-0.300675	1	-0.217621	1	-0.046368	1	0.124435	1	0.103173	1	0.226849	1	-0.0282631	1.26104e-06	0.0200796	1	0.0365714	1	0.358994	1	0.174335	1	-0.0120729	1	0.0606657	1	-0.218447	1	-0.0312873	1	0.0653954	1	0.0995258	1	0.0805523	1	0.0250547	0.962967	FALSE	FALSE	-0.0294166	5.32667e-29	FALSE
Blcap	0.244994	1	-0.0458725	1	-0.0411728	1	-0.170837	1	-0.11162	1	0.027821	1	-0.0133246	1	-0.128763	1	-0.0462632	1	-0.0539053	5.69325e-20	-0.0593389	1	0.00768239	1	0.0712596	1	-0.0972178	0.0609937	-0.072142	1	-0.0441714	1	-0.0298536	1	-0.0171638	1	-0.00922746	1	-0.0345371	1	-0.011647	1	-0.0302524	7.01784e-06	FALSE	FALSE	0.0202539	3.66689e-23	FALSE
Blmh	0.0719597	1	0.316729	1	0.0608676	1	-0.0358184	1	-0.141533	1	0.0367566	1	-0.0792641	1	0.0340404	1	-0.00166897	1	-0.0486608	5.17451e-15	-0.017294	1	-0.137742	1	0.0512912	1	0.0619692	1	-0.0349832	1	0.120581	1	0.0300795	1	-0.328415	1	-0.0143339	1	0.00680989	1	0.101503	1	0.00251787	0.0109353	FALSE	FALSE	-0.131973	1.24423e-109	FALSE
Bloc1s1	0.019329	1	0.0380638	1	0.129684	1	-0.0152188	1	0.037072	1	0.0903446	1	0.0696272	1	0.283397	1	-0.0210099	1	0.00864805	5.54678e-06	0.0905969	1	0.140696	1	0.163608	1	0.142172	1	0.0538302	1	0.145188	1	0.0544161	1	-0.0794503	1	-0.0569978	1	0.0631797	1	-0.0739804	1	0.0611045	0.987378	FALSE	FALSE	0.0332718	1.05598e-25	FALSE
Bloc1s2	-0.0260208	1	-0.0691219	1	0.0316385	1	-0.0576239	1	0.0348938	1	-0.0638826	1	-0.0904144	1	-0.184558	1	-0.078807	1	-0.0548985	7.77817e-10	-0.149257	0.309933	-0.208406	1	0.1019	1	-0.117083	1	0.0272997	1	0.0685768	1	-0.320911	1	0.0410283	1	-0.141593	1	0.165663	1	-0.182429	1	-0.060667	0.375185	FALSE	FALSE	-0.0989631	5.45142e-71	FALSE
Bloc1s4	0.0033414	1	-0.0360109	1	-0.058128	1	0.211394	1	-0.173908	1	-0.115139	1	-0.132183	1	-0.221874	1	-0.223084	1	-0.0145633	1.96099e-07	-0.167057	1	-0.030198	1	0.149397	1	-0.0253098	1	-0.297937	0.463	0.0134627	1	-0.193341	1	-0.0955481	1	-0.0207737	1	-0.17013	1	-0.112346	1	-0.0814254	0.855843	FALSE	FALSE	-0.0231764	2.73829e-46	FALSE
Bloc1s5	0.139958	1	-0.0329227	1	0.1625	1	-0.0940112	1	0.0202716	1	0.0739113	1	0.102735	1	0.102488	1	0.18562	1	0.0119795	0.00099171	-0.00541039	1	0.0610127	1	0.00857942	1	-0.0796965	1	-0.0709667	1	0.0932408	1	-0.0435285	1	0.0182474	1	-0.113754	1	0.0207849	1	0.0738591	1	0.0302332	0.999988	FALSE	FALSE	0.0446398	3.52597e-10	FALSE
Bloc1s6	0.341806	1	0.0348988	1	0.00272791	1	-0.140151	1	0.32398	1	0.175042	1	0.107724	1	-0.0288012	1	0.22862	1	0.0773134	1	0.0710538	1	0.12725	1	-0.106117	1	0.14377	1	-0.0708395	1	0.091731	1	-0.00118348	1	0.356335	1	0.190035	1	0.0898892	1	0.0148491	1	0.0966635	1	FALSE	FALSE	0.118518	1	FALSE
Blvra	0.10756	1	0.162054	1	0.097077	1	0.0539123	1	0.177491	1	-0.0421247	1	-0.12906	1	-0.123465	1	-0.0209517	1	0.0633057	1	0.119382	1	-0.0761451	1	-0.0458096	1	-0.0275444	1	-0.0163976	1	0.120191	1	-0.0406654	1	-0.0147559	1	-0.0505183	1	-0.0919659	1	0.0230525	1	0.0116487	1	FALSE	FALSE	0.0862777	3.95149e-05	FALSE
Blvrb	0.346683	1	0.125108	1	0.262187	1	0.579181	1	0.0875404	1	0.134905	1	0.263129	1	0.398586	1	0.122765	1	0.159173	1	0.144855	1	0.214936	1	0.399989	1	0.185329	1	0.251306	1	0.262121	1	0.0921109	1	0.442388	1	0.153347	1	0.11142	1	0.306633	1	0.240176	1	FALSE	FALSE	0.474004	7.63393e-80	FALSE
Blzf1	-0.0973934	1	0.00543148	1	-0.168831	1	0.299678	1	0.0512831	1	0.0307309	1	0.00216862	1	-0.0438558	1	0.0976555	1	-0.0241289	5.58453e-12	0.0863817	1	0.0460816	1	-0.0765059	1	-0.059709	1	0.0629739	1	-0.0158185	1	-0.113348	1	0.142593	1	-0.069222	1	-0.036225	1	-0.179484	1	-0.00283543	0.142432	FALSE	FALSE	-0.0162755	3.24291e-49	FALSE
Bmi1	0.0513585	1	-0.0976765	1	-0.0770833	1	0.079847	1	-0.180389	1	-0.00195365	1	0.0793795	1	-0.0597507	1	0.0735662	1	-0.046766	1.11549e-19	-0.00633836	1	0.0270005	1	-0.0169821	1	-0.0467333	1	0.131749	1	0.294042	1	0.107067	1	0.0969575	1	-0.175737	1	0.150139	1	0.0607487	1	0.0210688	5.15e-05	FALSE	FALSE	0.0307325	2.49788e-25	FALSE
Bmp1	-0.0351053	1	-0.173927	1	0.190294	1	0.0508326	1	0.176543	1	0.180241	1	-0.111405	1	-0.0390505	1	0.129323	1	-0.0211549	3.06277e-09	0.0320029	1	-0.16171	1	0.156004	1	-0.0416511	1	0.145778	1	0.0213244	1	0.109067	1	-0.0328307	1	-0.0166134	1	-0.0333635	1	0.0510872	1	0.0274137	0.59423	FALSE	FALSE	0.0528499	1.79537e-15	FALSE
Bmp2k	-0.143961	1	-0.0323935	1	-0.29577	1	0.0246352	1	0.00353699	1	0.00326581	1	0.0930239	1	-0.0584362	1	-0.101473	1	-0.0601661	7.68068e-23	-0.0270523	1	0.0222873	1	-0.153559	1	-0.136347	1	0.00307932	1	0.214792	1	0.0543305	1	-0.0495587	1	-0.00181642	1	-0.143596	1	-0.0464242	1	-0.0396001	7.00847e-07	FALSE	FALSE	-0.0721062	4.78413e-100	FALSE
Bmpr1a	-0.00129762	1	0.164228	1	-0.0572372	1	-0.0484596	1	0.0261858	1	0.0624457	1	0.110275	1	0.0369737	1	-0.047942	1	0.0041035	1.92296e-07	0.0235399	1	-0.0415377	1	-0.164394	1	-0.056632	1	0.0707506	1	0.128543	1	0.278963	1	-0.0338443	1	0.0913822	1	0.137985	1	0.0216558	1	0.0336041	0.896106	FALSE	FALSE	0.00850207	1.08086e-32	FALSE
Bmpr2	-0.159401	1	-0.0532282	1	-0.0272284	1	-0.166817	1	-0.202645	1	0.0890061	1	-0.0743841	1	-0.223691	1	-0.0952823	1	-0.0936082	2.13018e-19	0.0261915	1	-0.00314533	1	-0.220731	1	-0.0718232	1	-0.06893	1	-0.0980161	1	0.00419213	1	-0.0730939	1	0.0435281	1	0.0663203	1	-0.0636818	1	-0.0698318	7.37748e-05	FALSE	FALSE	-0.0518289	7.49147e-53	FALSE
Bms1	0.0339362	1	0.0569523	1	-0.328448	1	-0.0743273	1	0.250099	1	0.174665	1	0.0926195	1	0.24237	1	0.196226	1	0.0809348	1	0.109296	1	0.00306482	1	0.0968011	1	0.12165	1	0.0960009	1	0.215851	1	0.236589	1	0.0691459	1	0.209108	1	0.386162	1	-0.0152635	1	0.107306	1	FALSE	FALSE	0.103658	1	FALSE
Bmt2	-0.0346813	1	0.265066	1	-0.130435	1	0.0247291	1	-0.0434465	1	-0.0263437	1	-0.0821354	1	-0.123589	1	-0.0124043	1	-0.0268908	2.92803e-14	0.0345707	1	-0.173784	1	0.238804	1	-0.0870146	1	0.0359255	1	-0.0792185	1	0.0643113	1	-0.221151	1	0.0129519	1	0.078774	1	0.0325588	1	-0.0120668	0.0224226	FALSE	FALSE	-0.0376844	5.04811e-71	FALSE
Bnip1	0.116026	1	0.108556	1	-0.0364277	1	-0.207553	1	0.284059	1	-0.0626124	1	-0.0325084	1	0.00138847	1	0.021989	1	-0.0256382	5.8449e-13	-0.0433922	1	0.114231	1	-0.105283	1	-0.0102673	1	-0.0400729	1	0.171663	1	-0.127249	1	0.196446	1	0.00208555	1	-0.0170238	1	-0.221646	1	0.00413187	0.0686507	FALSE	FALSE	-0.0303645	5.09749e-62	FALSE
Bnip2	0.14873	1	-0.197801	1	-0.145907	1	-0.160116	1	0.060873	1	-0.136086	1	-0.103865	1	-0.187298	1	-0.173282	1	-0.0259694	0.0463368	0.062764	1	-0.0509747	1	-0.106183	1	-0.0165227	1	0.0838157	1	-0.229425	1	-0.0713553	1	-0.139935	1	-0.0449162	1	-0.00303649	1	-0.112777	1	-0.0737746	1	FALSE	FALSE	-0.0212485	2.11434e-12	FALSE
Bnip3	0.448699	1	0.351309	1	-0.263308	1	-0.026199	1	-0.968716	1	-0.127046	1	0.365339	1	-0.427114	1	-0.0198872	1	-0.05142	0.0170575	0.101348	1	-0.26754	1	0.0778767	1	-0.172356	1	-0.341925	1	-0.504218	1	-0.858603	1	-0.436369	1	0.323652	1	0.0206746	1	-0.0701264	1	-0.135521	1	FALSE	FALSE	-0.101923	3.42648e-27	FALSE
Bnip3l	0.433023	1	0.0765959	1	0.179459	1	0.149752	1	-0.425364	1	0.103758	1	0.244824	1	-0.168123	1	0.234463	1	0.0726535	1	0.116911	1	0.0717142	1	-0.0349366	1	0.0175393	1	-0.192825	1	-0.19275	1	-0.268139	1	-0.175898	1	0.182337	1	-0.167729	1	-0.000635635	1	0.0122205	1	FALSE	FALSE	0.0715328	1	FALSE
Bod1	0.0131503	1	-0.143031	1	-0.124021	1	-0.218225	1	-0.00599021	1	-0.0121554	1	-0.0320453	1	-0.0242876	1	-0.0319601	1	0.0496719	1	0.0212686	1	0.0309863	1	-0.116832	1	-0.205259	1	-0.141954	1	0.165916	1	0.0768211	1	-0.0275489	1	-0.0167736	1	-0.137399	1	-0.0173828	1	-0.0427167	1	FALSE	FALSE	0.0884747	0.64311	FALSE
Bod1l	-0.0173887	1	-0.123756	1	-0.314298	1	-0.0405305	1	-0.0274101	1	0.0373587	1	-0.163134	1	0.0910301	1	0.141101	1	-0.05997	0.00962733	0.139051	1	-0.031689	1	0.0336452	1	0.127419	1	0.10611	1	0.0258255	1	-0.276307	1	-0.171989	1	-0.101772	1	-0.210464	1	-0.275537	1	-0.0529859	1	FALSE	FALSE	0.0178611	1	FALSE
Bok	-0.192046	1	-0.0644194	1	-0.0912359	1	-0.11822	1	0.344029	1	-0.149978	1	0.199422	1	-0.486142	1	-0.133099	1	-0.0111888	0.156952	-0.145189	1	-0.0542755	1	0.117427	1	-0.0253844	1	-0.238423	1	0.120325	1	0.0181857	1	0.363942	1	0.0912587	1	-0.24479	1	0.108761	1	-0.0281448	1	FALSE	FALSE	-0.149462	2.80747e-68	FALSE
Bola1	-0.253328	1	-0.0781101	1	0.143285	1	-0.0236002	1	-0.247129	1	-0.0834508	1	-0.0815597	1	-0.0625992	1	-0.108627	1	-0.0448928	0.0296747	0.121606	1	-0.0511787	1	-0.0970245	1	0.136663	1	0.289796	1	-0.202031	1	-0.296639	1	0.100713	1	-0.00443221	1	-0.205302	1	-0.161952	1	-0.0576092	1	FALSE	FALSE	0.0757736	1	FALSE
Bola2	-0.102987	1	-0.326697	1	0.228687	1	0.122172	1	0.354367	1	0.104384	1	0.121466	1	-0.0924158	1	-0.235482	1	0.0495	1	0.0192003	1	-0.0202117	1	0.130814	1	0.00526225	1	0.141691	1	0.209648	1	-0.0670868	1	0.117061	1	-0.0679089	1	0.228165	1	0.176085	1	0.0521768	1	FALSE	FALSE	0.0712849	1	FALSE
Bola3	0.0818889	1	-0.266642	1	-0.128926	1	-0.226654	1	0.534173	1	0.0348707	1	-0.117995	1	-0.0726169	1	0.169813	1	0.0296636	1	-0.0158878	1	-0.0233627	1	0.0728446	1	-0.00794911	1	0.248877	1	0.243529	1	0.255134	1	0.0451709	1	0.0644068	1	-0.0068639	1	0.0655727	1	0.0466213	1	FALSE	FALSE	0.0571981	0.594601	FALSE
Bop1	-0.0811949	1	0.011652	1	0.0714568	1	0.0324064	1	0.0293693	1	0.0247285	1	-0.106868	1	-0.129555	1	0.107079	1	0.0192536	0.00760272	-0.0681221	1	-0.0375233	1	-0.0254569	1	-0.0218701	1	-0.0503451	1	0.0724625	1	-0.0638536	1	-0.0893429	1	-0.0618316	1	0.113021	1	0.0700342	1	-0.00878573	1	FALSE	FALSE	0.00753044	1.71664e-29	FALSE
Bora	-0.164964	1	-0.110917	1	0.150054	1	-0.108321	1	0.0732152	1	0.0434606	1	-0.0630797	1	0.0310703	1	0.0236011	1	-0.00749099	0.000169221	-0.0999064	0.152785	-0.122931	1	0.0452701	1	0.00681215	1	0.117041	1	0.165637	1	-0.216201	1	0.130472	1	0.0414818	1	-0.0453283	1	0.107348	1	-0.000175133	0.997017	FALSE	FALSE	-0.0129851	1.03655e-43	FALSE
Borcs6	0.0349926	1	-0.00809576	1	0.199726	1	-0.0747229	1	-0.137621	1	0.0449531	1	-0.0159752	1	0.165789	1	0.0734826	1	0.00979768	1.22785e-06	0.0223111	1	-0.0883746	1	-0.0664736	1	0.0313904	1	-0.079022	1	-0.183196	1	-0.13909	1	0.146591	1	0.0698988	1	-0.141381	1	-0.0203963	1	-0.0074008	0.96233	FALSE	FALSE	0.0030274	1.33029e-45	FALSE
Borcs7	0.131259	1	-0.055091	1	-0.0688967	1	-0.0914556	1	0.0189569	1	-0.0664599	1	0.125452	1	-0.0693449	1	0.00962724	1	-0.0284095	8.9119e-16	0.046358	1	-0.0544555	1	-0.0892303	1	0.079596	1	0.295802	1	0.0440436	1	0.293064	1	0.0767992	1	0.0980446	1	-0.171992	1	0.114859	1	0.030406	0.00503195	FALSE	FALSE	-0.0410156	6.69945e-79	FALSE
Borcs8	-0.00207949	1	-0.0268417	1	-0.0462368	1	0.0651465	1	0.221965	1	-0.0761814	1	-0.223283	0.615594	0.0270182	1	0.233782	1	-0.0254568	4.15765e-05	-0.116121	1	0.0873512	1	-0.0537478	1	0.0314388	1	-0.117881	1	0.01835	1	0.123764	1	0.0993248	1	-0.0544439	1	0.279385	1	0.093057	1	0.0256339	0.996985	FALSE	FALSE	-0.0833856	3.14994e-53	FALSE
Bpgm	0.118935	1	0.179814	1	-0.206944	1	0.131708	1	-0.255809	1	0.32452	1	0.470457	1	0.0657907	1	0.115215	1	-0.0218396	1	0.0480183	1	0.207281	1	-0.0853811	1	0.54843	1	0.000645791	1	-0.706246	1	-0.275632	1	0.248008	1	0.0941171	1	-0.75165	1	0.236436	1	0.0231369	1	FALSE	FALSE	0.0687793	1	FALSE
Bphl	0.144807	1	0.0482261	1	0.134521	1	-0.0949887	1	-0.101721	1	-0.0402245	1	0.0046022	1	0.00990945	1	0.0414489	1	0.0158776	1.67175e-07	0.0968234	1	0.0859587	1	-0.0508257	1	-0.149947	0.416922	-0.0584094	1	-0.107795	1	-0.203444	1	0.257562	1	0.100864	1	-0.199283	1	-0.0564215	1	-0.00583142	0.839794	FALSE	FALSE	0.0807711	8.4051e-09	FALSE
Bptf	0.175926	1	-0.178726	1	-0.0075645	1	0.216194	1	-0.100822	1	0.151239	1	-0.0630892	1	-0.072454	1	0.150334	1	-0.0232806	1	0.0834602	1	0.0873696	1	-0.170877	1	0.145977	1	0.169801	1	0.216178	1	-0.0381629	1	0.0332754	1	0.0921752	1	-0.325708	1	0.0128601	1	0.026386	1	FALSE	FALSE	0.167187	0.00135454	FALSE
Braf	-0.0766762	1	0.147538	1	-0.0483629	1	-0.104125	1	0.0133871	1	-0.0260026	1	0.0294145	1	0.0493323	1	-0.0712074	1	-0.00799476	1.92062e-12	-0.0405396	1	0.111659	1	0.0811443	1	-0.0264025	1	-0.0696524	1	-0.120948	1	-0.0284867	1	0.0928388	1	-0.0291069	1	-0.102308	1	-0.173799	1	-0.0190618	0.102179	FALSE	FALSE	-0.0268626	4.13031e-64	FALSE
Brap	-0.00349143	1	-0.0111465	1	-0.035762	1	-0.231993	1	-0.203658	1	-0.0495341	1	0.0431488	1	0.152859	1	-0.162646	1	-0.01724	8.46403e-13	-0.0101261	1	-0.0569312	1	-0.0336277	1	-0.0264462	1	-0.127673	1	-0.065664	1	0.0309492	1	-0.0414603	1	-0.0898032	1	-0.124026	1	-0.0535006	1	-0.0532273	0.0779307	FALSE	FALSE	-0.0291795	1.0123e-66	FALSE
Brca2	-0.126831	1	0.164783	1	-0.0181957	1	-0.111499	1	-0.232191	1	-0.0506539	1	-0.0647007	1	-0.0473152	1	0.216672	1	0.0215278	0.397069	-0.105021	1	-0.148702	1	0.11133	1	0.083203	1	-0.0432768	1	0.0745129	1	0.106214	1	-0.223215	1	-0.0606685	1	0.0111933	1	0.0353425	1	-0.0194043	1	FALSE	FALSE	0.0319336	1.00905e-13	FALSE
Brcc3	0.0874458	1	-0.295309	1	-0.183374	1	-0.00217388	1	0.240726	1	0.0234962	1	0.050924	1	-0.341526	1	0.157781	1	-0.0240164	2.16748e-05	-0.0622507	1	-0.14979	1	0.145968	1	0.024224	1	-0.113385	1	-0.0212583	1	0.0973447	1	-0.196152	1	-0.130802	1	-0.102736	1	0.137792	1	-0.0312892	0.996411	FALSE	FALSE	-0.0212104	5.99661e-34	FALSE
Brd1	0.136245	1	0.00491536	1	0.00363306	1	-0.21096	1	0.251748	1	-0.0478267	1	0.0135679	1	0.324006	1	-0.135177	1	0.0481801	1	0.018088	1	0.138922	1	-0.0144508	1	0.155402	1	0.144999	1	-0.0118921	1	0.118215	1	0.308627	1	0.310104	1	-0.11587	1	-0.0564796	1	0.0659046	1	FALSE	FALSE	0.148004	1	FALSE
Brd2	-0.182664	1	0.19762	1	0.0061317	1	-0.105975	1	0.212412	1	0.173932	1	0.0466919	1	-0.491441	1	-0.0510298	1	-0.051303	0.258585	0.0359051	1	-0.143933	1	-0.0386263	1	-0.0578538	1	-0.0144676	1	-0.133591	1	-0.155763	1	0.196034	1	0.389924	1	-0.139387	1	-0.0377477	1	-0.0164349	1	FALSE	FALSE	-0.103959	2.08404e-34	FALSE
Brd3	-0.0586257	1	0.0983548	1	-0.256915	1	0.180502	1	0.0209515	1	0.0582111	1	0.021069	1	-0.0301499	1	0.0715838	1	0.0175851	1	0.0904263	1	-0.113352	1	0.182658	1	0.147944	1	0.00999136	1	0.0107348	1	-0.0425898	1	-0.110019	1	0.0156563	1	0.0969853	1	0.246729	1	0.0313205	1	FALSE	FALSE	0.143851	1	FALSE
Brd4	0.112859	1	0.00130367	1	0.00580403	1	-0.0317401	1	0.0175383	1	0.0317537	1	-0.152668	1	0.0151591	1	0.130306	1	0.00833469	1	-0.0365777	1	-0.138939	1	0.0463818	1	-0.0302246	1	0.106271	1	0.0405371	1	0.0951581	1	0.333991	1	0.015867	1	-0.407445	1	0.00179854	1	0.0078795	1	FALSE	FALSE	-0.0594359	3.1035e-23	FALSE
Brd7	-0.127188	1	-0.0146333	1	0.117729	1	-0.00600206	1	0.0560007	1	0.0110966	1	0.109108	1	0.0994424	1	-0.0984997	1	-0.0469866	4.99138e-08	-0.0661234	1	-0.0552059	1	-0.0571335	1	-0.0512167	1	0.0984719	1	-0.103459	1	-0.00642218	1	-0.153917	1	0.0254259	1	-0.120475	1	-0.052055	1	-0.0210497	0.818199	FALSE	FALSE	-0.049882	1.72712e-39	FALSE
Brd8	-0.0720701	1	0.232672	1	0.0417804	1	0.0943425	1	-0.136428	1	0.0841608	1	0.233062	1	-0.0010796	1	-0.0433255	1	-0.00852995	6.15551e-05	0.121326	1	-0.0197155	1	0.0893499	1	0.00854231	1	-0.0350927	1	-0.022782	1	-0.104778	1	-0.0448592	1	-0.00384549	1	0.276531	1	-0.203155	1	0.0231479	0.9989	FALSE	FALSE	0.0690191	4.4566e-06	FALSE
Brd9	-0.021333	1	0.0980882	1	-0.0417949	1	-0.0599219	1	0.300596	1	0.311869	1	0.0745715	1	-0.0391632	1	0.140935	1	0.091024	1	0.215151	1	0.127559	1	0.175	1	0.266739	1	0.271724	1	0.225635	1	0.111541	1	0.0895152	1	-0.0179473	1	-0.126973	1	0.173586	1	0.112686	1	FALSE	FALSE	0.136439	1	FALSE
Brf2	-0.0595798	1	-0.0313848	1	-0.0463958	1	-0.0559609	1	-0.0761415	1	0.00790272	1	0.037946	1	0.0827338	1	-0.0409172	1	0.0218752	0.0720325	-0.0372073	1	-0.0123015	1	0.023673	1	0.0137004	1	-0.0549243	1	-0.0878599	1	0.0109182	1	0.000377607	1	-0.0174965	1	-0.0121861	1	0.0188843	1	-0.0149688	1	FALSE	FALSE	0.00439103	8.71918e-26	FALSE
Bri3	0.0928823	1	-0.165253	1	0.212065	1	-0.30345	1	-0.317651	1	-0.283322	0.0145129	-0.0783663	1	0.334398	1	-0.252778	1	0.00645444	1	0.133743	1	-0.127681	1	0.0432176	1	-0.156796	1	-0.0790251	1	0.128608	1	-0.181405	1	-0.367026	1	-0.103377	1	-0.205542	1	0.0558261	1	-0.0768799	1	FALSE	FALSE	0.0295561	1	FALSE
Bri3bp	-0.186896	1	0.00343756	1	0.0558394	1	0.0344373	1	-0.0458658	1	0.137412	1	-0.0376664	1	-0.104516	1	-0.0646832	1	0.0387829	1	-0.0451841	1	0.12502	1	0.151543	1	-0.0592548	1	0.0165987	1	0.21585	1	0.147748	1	-0.104525	1	0.0544044	1	-0.124144	1	0.288188	1	0.0236441	1	FALSE	FALSE	0.0140103	2.99672e-13	FALSE
Brip1os	0.0714073	1	-0.160489	1	-0.0265922	1	0.0485569	1	-0.039011	1	-0.012217	1	0.129811	1	0.0824805	1	-0.094455	1	-0.0144012	6.98659e-11	0.0417346	1	-0.0130344	1	-0.0590091	1	-0.0269215	1	0.132367	1	-0.170181	1	-0.0459045	1	0.110495	1	-0.00452856	1	0.019411	1	0.00109532	1	-0.00139934	0.282983	FALSE	FALSE	0.0107115	9.09777e-31	FALSE
Brix1	-0.156364	1	-0.0712387	1	-0.141582	1	0.35031	1	0.0255584	1	0.156486	1	0.0117366	1	0.166346	1	0.0163267	1	0.133784	1	0.118207	1	-0.0809144	1	0.207028	1	0.0420219	1	0.141525	1	0.0854855	1	0.172123	1	0.168247	1	-0.210166	1	-0.00389658	1	0.225566	1	0.0645995	1	FALSE	FALSE	0.134659	1	FALSE
Brk1	-0.00220757	1	-0.0375281	1	0.094383	1	-0.286498	1	0.337399	1	0.0431903	1	-0.00182092	1	-0.0867693	1	-0.00500429	1	0.0255744	1	-0.0343842	1	-0.0187711	1	-0.140676	1	0.0559266	1	0.00580263	1	-0.0121743	1	0.129272	1	-0.129417	1	0.0116664	1	0.099859	1	0.16422	1	0.0100973	1	FALSE	FALSE	0.0124601	1	FALSE
Brms1	0.098437	1	0.171722	1	0.0503473	1	0.139931	1	0.075871	1	0.00185996	1	-0.0508141	1	-0.133261	1	-0.0508206	1	0.00425336	2.89055e-07	0.056005	1	0.01296	1	0.154342	1	0.00435797	1	0.0218765	1	-0.135216	1	0.171375	1	0.225299	1	-0.0921389	1	-0.0626688	1	-0.0310511	1	0.030127	0.914638	FALSE	FALSE	0.022484	9.50805e-30	FALSE
Brms1l	-0.053877	1	-0.0777009	1	0.020274	1	-0.0504672	1	-0.0218553	1	0.0073112	1	-0.00104176	1	-0.0923467	1	0.0212228	1	-0.0254283	4.0456e-13	0.0408187	1	-0.118173	1	0.0417885	1	-0.0262635	1	-0.074297	1	0.0308145	1	0.101499	1	-0.0622171	1	0.0201243	1	0.0554863	1	0.0170024	1	-0.0117774	0.0603644	FALSE	FALSE	-0.00206717	9.06127e-40	FALSE
Brox	-0.126289	1	0.0674239	1	-0.115929	1	0.29132	1	-0.199164	1	0.060146	1	0.0102771	1	-0.0566483	1	-0.144415	1	-0.0411561	1.61175e-11	-0.0454243	1	-0.0356873	1	0.0636009	1	0.128742	1	0.0645818	1	0.185391	1	0.120241	1	0.257254	1	-0.0462609	1	0.0956268	1	0.175077	1	0.0337479	0.193337	FALSE	FALSE	-0.000482409	2.09189e-37	FALSE
Brpf1	-0.0269426	1	0.105557	1	-0.0101082	1	0.0826106	1	-0.169044	1	0.119306	1	0.0638009	1	-0.112523	1	0.0994257	1	0.00980699	3.10165e-05	0.0285299	1	-0.0180859	1	0.110822	1	0.000991736	1	0.12094	1	-0.0651058	1	-0.093566	1	0.0513231	1	0.0710646	1	0.0297073	1	0.0270184	1	0.0202633	0.997551	FALSE	FALSE	0.0186953	6.1036e-29	FALSE
Brwd1	-0.0556657	1	-0.0703921	1	0.0325408	1	-0.0506961	1	0.0692696	1	-0.055717	1	0.00202767	1	-0.216452	1	-0.0108406	1	-0.0322773	8.65441e-15	0.0492592	1	-0.111383	1	-0.211033	1	-0.0464292	1	0.0384017	1	0.07745	1	-0.0733628	1	0.23526	1	-0.0234783	1	-0.129776	1	-0.0866165	1	-0.0319005	0.0136005	FALSE	FALSE	-0.034155	2.94907e-64	FALSE
Brwd3	0.0861894	1	-0.00635558	1	-0.135156	1	-0.105844	1	0.0297854	1	0.00285449	1	-0.101282	1	-0.0883946	1	0.0517312	1	-0.0636738	3.74115e-19	0.0209658	1	-0.0146838	1	-0.129631	1	-0.0118716	1	0.063929	1	0.0988971	1	-0.100231	1	0.124547	1	0.0176253	1	-0.000236162	1	0.056214	1	-0.0097438	0.000100545	FALSE	FALSE	-0.013475	2.08646e-37	FALSE
Bsdc1	0.0450498	1	-0.158602	1	-0.100987	1	0.225858	1	0.0116974	1	0.00676304	1	0.0358968	1	0.0794701	1	0.0729573	1	0.00227378	0.0744742	0.0236831	1	-0.105071	1	0.141986	1	-0.0779449	1	0.167792	1	0.118311	1	-0.0806954	1	0.0627904	1	0.0126544	1	-0.0501691	1	-0.0105475	1	0.0201507	1	FALSE	FALSE	-0.0118793	5.3563e-40	FALSE
Bsg	0.655917	0.454103	0.151626	1	0.171506	1	-0.0422888	1	-0.594052	1	-0.0807939	1	0.177549	1	-0.248875	1	0.295765	1	0.105109	1	-0.0254543	1	0.0467675	1	0.208539	1	-0.0640307	1	-0.328969	1	-0.221898	1	-0.168705	1	-0.356076	1	0.310253	1	0.128589	1	-0.063231	1	0.00272606	1	FALSE	FALSE	-0.0642393	4.0791e-05	FALSE
Bsn	0.0363605	1	0.00787802	1	-0.0425834	1	-0.0863218	1	0.165506	1	0.0532447	1	0.0362696	1	-0.0766407	1	-0.0360728	1	0.0425592	1	0.00310776	1	-0.0417972	1	-0.0508124	1	-0.0245716	1	-0.0649018	1	0.115027	1	-0.0647615	1	-0.0928238	1	0.129188	1	-0.100672	1	0.0644275	1	-0.00135197	1	FALSE	FALSE	0.0545494	1	FALSE
Bst2	0.586609	1	0.0932928	1	-0.18266	1	-0.351728	1	-0.223074	1	0.491662	1	-0.239888	1	0.168535	1	-0.0496364	1	0.149496	0.0198475	0.184433	1	-0.127638	1	-0.067026	1	0.322738	1	0.013236	1	0.0961741	1	0.031869	1	0.247317	1	0.383726	1	-0.178578	1	0.102985	1	0.0691354	1	FALSE	FALSE	0.0289891	1.76574e-06	FALSE
Btaf1	-0.149241	1	0.300896	1	-0.0312064	1	-0.149674	1	-0.225648	1	-0.0681917	1	-0.000767977	1	-0.143705	1	0.101106	1	-0.0442504	8.18481e-20	-0.0318906	1	0.0422671	1	0.0884354	1	-0.0620126	1	-0.0872367	1	-0.00113472	1	0.0874288	1	-0.0988725	1	-0.0883071	1	-0.0177915	1	0.0601543	1	-0.0247448	4.32999e-05	FALSE	FALSE	-0.0350642	2.51791e-68	FALSE
Btbd1	-0.038999	1	-0.133624	1	-0.256201	1	-0.0947783	1	-0.0713544	1	-0.0727939	1	0.0228082	1	-0.0945012	1	-0.236109	1	-0.0501355	1.04006e-14	-0.0179277	1	0.0117133	1	-0.312602	0.245218	-0.213396	0.0817929	-0.0727952	1	0.0311243	1	-0.207926	1	-0.257263	1	-0.0372271	1	-0.217605	1	-0.162937	1	-0.118216	0.00256446	FALSE	FALSE	-0.0840403	1.17412e-82	FALSE
Btbd10	0.125581	1	-0.0515341	1	-0.127115	1	-0.113577	1	-0.129926	1	-0.0604096	1	-0.056452	1	-0.0904786	1	0.0128565	1	-0.0408519	3.24351e-14	-0.0089096	1	-0.00524264	1	0.000305336	1	-0.0972783	0.12269	-0.0900368	1	-0.26187	1	0.0223281	1	-0.0598585	1	-0.152839	1	-0.234259	1	0.0671141	1	-0.0644025	0.00976743	FALSE	FALSE	-0.0376905	5.26353e-66	FALSE
Btbd2	-0.0760782	1	-0.134838	1	0.0649735	1	-0.177577	1	-0.0338854	1	-0.097986	0.0103347	0.00584893	1	-0.12402	1	0.0380831	1	-0.000951867	7.10714e-09	0.0525717	1	0.155377	1	-0.113296	1	-0.0169893	1	-0.00467254	1	0.305656	1	0.0792476	1	-0.0783597	1	0.0263911	1	-0.0737554	1	-0.186028	1	-0.0185852	0.28643	FALSE	FALSE	0.0252638	9.25588e-21	FALSE
Btbd3	0.107274	1	1.04528e-06	1	0.0702478	1	0.0428827	1	0.159683	1	0.0732898	1	0.072546	1	0.0105058	1	-0.00270419	1	-0.00748332	6.60722e-08	0.0262456	1	-0.0637676	1	0.0737647	1	-0.0652579	1	0.0816409	1	-0.163956	1	0.218459	1	0.0850135	1	0.0328125	1	-0.105325	1	-0.0722745	1	0.0273142	0.836436	FALSE	FALSE	0.0340099	1.21818e-09	FALSE
Btbd7	-0.105835	1	-0.15891	1	-0.0440644	1	-0.132865	1	-0.0620776	1	0.067828	1	-0.00836648	1	-0.418535	1	0.244833	1	-0.124756	4.56092e-20	0.11052	1	0.0600252	1	-0.119096	1	0.0199578	1	0.124481	1	-0.0894561	1	-0.0416035	1	-0.381697	1	0.00163556	1	-0.234034	1	0.216356	1	-0.0512219	3.11289e-05	FALSE	FALSE	-0.0345899	6.29884e-36	FALSE
Btbd9	-0.162067	1	-0.257868	1	0.0444991	1	-0.399684	0.310066	-0.0269255	1	-0.0288984	1	-0.0278607	1	0.0652724	1	-0.00542336	1	-0.0245135	2.84367e-11	0.0288161	1	-0.00944223	1	0.202457	1	0.0218549	1	-0.0733313	1	-0.0831812	1	0.175869	1	0.0392805	1	0.0801644	1	-0.0451271	1	-0.0819778	1	-0.0270518	0.162969	FALSE	FALSE	-0.0373794	2.20102e-65	FALSE
Btf3	-0.0135787	1	-0.09069	1	0.007378	1	-0.218361	1	-0.125586	1	0.122438	1	-0.0838797	1	-0.0751626	1	-0.241289	1	-0.0316595	1	-0.00785595	1	0.0116617	1	0.0404361	1	-0.252416	0.0431097	-0.160245	1	0.0582715	1	-0.259278	1	-0.118945	1	-0.0604256	1	-0.180838	1	-0.0555725	1	-0.0826475	1	FALSE	FALSE	0.0963559	1.40175e-25	FALSE
Btf3l4	-0.117655	1	0.156131	1	-0.113815	1	0.0633827	1	-0.00181408	1	0.00253085	1	-0.102856	0.203204	-0.0472685	1	-0.0163853	1	-0.0236694	7.63127e-11	-0.0330407	1	0.0458067	1	-0.0261413	1	-0.117472	0.115755	0.0814211	1	0.071507	1	-0.0869935	1	-0.143162	1	0.0060707	1	-0.0765229	1	0.112975	1	-0.0174748	0.0999706	FALSE	FALSE	-0.0408575	4.37317e-71	FALSE
Btg1	-0.00657564	1	-0.180221	1	-0.0698905	1	0.0442815	1	-0.493298	1	0.00313138	1	0.042548	1	-0.153987	1	0.0504451	1	-0.0601216	0.0001317	0.202644	1	0.0165259	1	-0.17356	1	-0.223894	1	0.0626756	1	-0.255314	1	-0.228025	1	-0.378146	1	-0.0608435	1	-0.103737	1	-0.460589	1	-0.115522	0.999599	FALSE	FALSE	-0.0541352	5.9204e-18	FALSE
Btg2	0.388196	1	-0.200156	1	0.30431	1	0.434777	1	0.549912	1	0.344734	1	0.150736	1	0.953192	1	-0.257391	1	0.0393158	1	0.477091	1	0.172931	1	-0.0184146	1	0.11758	1	0.242714	1	0.213428	1	-0.103426	1	0.0415471	1	0.231235	1	0.273677	1	-0.417581	1	0.187543	1	FALSE	FALSE	0.175319	1	FALSE
Btg3	0.0029441	1	-0.0290241	1	-0.0991028	1	0.0406934	1	0.0935648	1	0.0550148	1	0.0451535	1	0.114426	1	-0.0299285	1	0.05416	0.00833716	0.0105197	1	0.0965729	1	0.0838927	1	0.0887402	1	-0.0429992	1	-0.0322841	1	-0.0122147	1	-0.184543	1	-0.0749433	1	-0.109886	1	0.131754	1	0.00964335	1	FALSE	FALSE	-0.0611941	1.6801e-82	FALSE
Btrc	0.0249881	1	-0.102547	1	-0.0112175	1	0.176189	1	0.0456174	1	0.0651234	1	-0.0433297	1	-0.0014454	1	-0.0933221	1	-0.0381423	8.55528e-15	0.07274	1	0.117629	1	0.073681	1	0.0657486	1	-0.0552091	1	-0.208253	1	0.102064	1	-0.0462349	1	-0.0679875	1	0.0831192	1	-0.138437	1	0.000989277	0.0135348	FALSE	FALSE	-0.00855347	5.8789e-44	FALSE
Bub1	-0.16995	1	-0.0267303	1	-0.0433733	1	0.0834015	1	0.151915	1	0.0298413	1	0.105245	1	-0.0657928	1	-0.00187809	1	-0.00858766	0.271722	0.00156667	1	-0.0721055	1	-0.0260974	1	-0.0574714	1	0.193812	1	-0.34698	1	0.00682042	1	-0.166862	1	-0.0498054	1	0.0332061	1	-0.0644148	1	-0.0235353	1	FALSE	FALSE	0.0234949	4.14389e-15	FALSE
Bub1b	-0.175091	1	-0.136768	1	0.00899766	1	0.155609	1	0.345864	1	-0.0402255	1	-0.00480114	1	-0.127142	1	0.06544	1	0.0682425	1	0.0113721	1	0.0342979	1	0.152793	1	-0.107232	1	0.035632	1	-0.262496	1	0.0423169	1	0.0662142	1	0.0730555	1	0.0642235	1	-0.084382	1	0.00885332	1	FALSE	FALSE	0.0639925	1.28997e-05	FALSE
Bub3	0.0113123	1	-0.467314	1	-0.0859518	1	0.0974664	1	0.158582	1	-0.0581629	1	-0.117328	1	-0.0276056	1	0.088034	1	0.0120448	0.249218	0.0395037	1	-0.0200236	1	-0.0171373	1	-0.125552	1	-0.181469	1	-0.175888	1	0.060237	1	-0.0884426	1	-0.112233	1	0.0698628	1	-0.0918612	1	-0.0491393	1	FALSE	FALSE	-0.0477942	8.9474e-31	FALSE
Bud13	0.0289084	1	0.130729	1	-0.0866874	1	0.0155316	1	-0.060968	1	-0.0661129	1	-0.00972209	1	-0.127363	1	-0.115042	1	-0.0174582	1.02181e-06	-0.0157032	1	-0.0154521	1	-0.056324	1	0.0245497	1	0.0466202	1	0.0655474	1	-0.0907229	1	-0.048327	1	0.0444839	1	0.0237105	1	-0.118239	1	-0.0213353	0.957727	FALSE	FALSE	-0.00330647	1.08103e-35	FALSE
Bud23	-0.123721	1	-0.306282	1	-0.0208847	1	-0.421745	0.791484	0.215209	1	-0.0808385	1	0.116532	1	-0.204993	1	-0.313845	0.00882459	-0.0316138	1.87913e-06	-0.140435	0.931112	-0.0622269	1	0.147717	1	-0.183662	1	-0.0958604	1	0.0382343	1	0.036462	1	0.0844169	1	0.113159	1	-0.0761245	1	-0.164197	1	-0.0702237	0.712945	FALSE	FALSE	-0.0450893	1.53528e-46	FALSE
Bud31	-0.184732	1	0.137641	1	0.277382	1	-0.213847	1	-0.277456	1	-0.0774467	1	-0.00768839	1	0.0373462	1	0.0195183	1	0.0358316	1	0.0144984	1	0.0558348	1	-0.0637955	1	-0.0512697	1	-0.0336669	1	0.142343	1	0.269863	1	0.221779	1	-0.0141531	1	-0.259502	1	-0.0227696	1	0.00027193	1	FALSE	FALSE	-0.017234	1.00707e-14	FALSE
Bvht	0.0282437	1	-0.0791281	1	-0.0558194	1	0.146612	1	0.10198	1	-0.0517506	1	-0.0477567	1	0.0621058	1	-0.113448	1	0.0218413	0.000311965	0.0392668	1	0.154829	1	-0.0156757	1	-0.0198892	1	0.0670911	1	-0.194087	1	-0.0227546	1	0.0777579	1	-0.108055	1	0.196297	1	0.016031	1	0.0096996	0.999894	FALSE	FALSE	0.00739206	2.34598e-34	FALSE
Bysl	0.0782727	1	-0.173003	1	0.171296	1	0.101711	1	-0.0117039	1	-0.0456219	1	-0.139466	1	-0.138966	1	0.0118521	1	0.0185018	1.17881e-05	-0.0443681	1	0.00878507	1	-0.132647	1	-0.0418592	1	-0.0235674	1	0.162018	1	0.187314	1	0.0431696	1	0.0697174	1	0.0658636	1	0.137714	1	0.0145244	0.993474	FALSE	FALSE	-0.0370052	3.92616e-61	FALSE
Bzw1	-0.145433	1	0.0836179	1	-0.146957	1	-0.126093	1	0.234241	1	0.0712341	1	-0.143928	1	-0.0502036	1	-0.151474	1	-0.0591964	0.382006	0.0647898	1	-0.0845715	1	-0.257412	1	-0.0908035	1	-0.128374	1	-0.196445	1	0.129158	1	0.153906	1	-0.0203495	1	0.0307289	1	-0.102821	1	-0.04459	1	FALSE	FALSE	-0.0777724	5.23621e-16	FALSE
Bzw2	-0.325949	1	-0.0268565	1	-0.0568765	1	-0.272858	1	0.209789	1	-0.0416087	1	-0.185145	1	-0.0657151	1	0.0909169	1	-0.0735596	0.000350803	-0.055723	1	-0.312277	1	0.0437278	1	-0.172004	1	-0.131092	1	-0.0967202	1	-0.0868561	1	-0.216736	1	-0.177086	1	-0.162203	1	-0.0876868	1	-0.104882	0.999913	FALSE	FALSE	-0.124737	6.2081e-42	FALSE
C1d	0.429228	1	-0.21586	1	-0.177739	1	0.0843151	1	-0.0559466	1	-0.0112164	1	-0.0747702	1	-0.174725	1	0.15373	1	-0.0422975	4.61887e-07	-0.100792	1	0.0435356	1	0.00898333	1	-0.16333	1	0.0523886	1	0.196918	1	0.0441518	1	0.308913	1	-0.039912	1	-0.000523036	1	-0.117539	1	0.00702449	0.933087	FALSE	FALSE	-0.0179982	5.19898e-23	FALSE
C1galt1	0.0130393	1	-0.106597	1	-0.198108	1	-0.163604	1	0.169144	1	0.0781359	1	-0.0487481	1	-0.0767223	1	-0.0768673	1	-0.0303809	5.67486e-13	-0.0857436	1	0.0741012	1	0.0164997	1	-0.058787	1	0.094685	1	0.113286	1	-0.0777578	1	-0.0303223	1	-0.0131275	1	-0.0465104	1	0.0450011	1	-0.0194944	0.0679523	FALSE	FALSE	-0.0666168	2.059e-90	FALSE
C1galt1c1	0.0556138	1	0.175639	1	0.0689063	1	0.0597445	1	0.0530313	1	0.0298224	1	0.000668764	1	0.0866418	1	-0.0729142	1	-0.0374077	1.04331e-17	0.0551445	1	-0.109251	1	0.149132	1	0.0138418	1	0.0389297	1	-0.058279	1	0.0585985	1	0.201577	1	-0.150261	1	0.126168	1	-0.0409735	1	0.0335415	0.000585652	FALSE	FALSE	0.00551117	1.18361e-44	FALSE
C1qbp	-0.17977	1	0.0956331	1	-0.0773438	1	-0.0139925	1	-0.0721177	1	0.0189931	1	-0.0793209	1	0.0915979	1	-0.273587	1	0.0117632	1	-0.135547	1	-0.284357	1	0.228917	1	-0.0262524	1	0.0794227	1	0.446781	1	-0.0800367	1	0.0882805	1	-0.0245821	1	0.264118	1	-0.197563	1	-0.00566491	1	FALSE	FALSE	-0.0158963	0.785303	FALSE
C1qc	0.21778	1	-0.00933003	1	0.130758	1	0.248248	1	0.106522	1	0.227214	1	0.329698	1	0.166636	1	0.459483	1	0.227679	2.98965e-10	0.255701	1	0.106622	1	0.0181109	1	0.275053	1	0.354973	1	0.279983	1	0.0528241	1	0.377613	1	0.290827	1	0.20204	1	0.180268	1	0.214224	0.392532	FALSE	FALSE	0.209483	4.23014e-25	FALSE
C1qtnf1	-0.0219092	1	0.0163172	1	-0.0603575	1	0.241287	1	0.08853	1	0.162081	1	0.0668084	1	-0.198642	1	0.0504177	1	0.0102329	0.597486	0.0568905	1	0.112359	1	0.0633136	1	0.121704	1	-0.0319276	1	0.200918	1	-0.0480474	1	0.101505	1	0.096425	1	0.0209004	1	0.0357817	1	0.051647	1	FALSE	FALSE	0.00515816	3.65513e-19	FALSE
C330007P06Rik	0.0396521	1	0.0251848	1	0.0728166	1	0.00159978	1	0.413712	1	0.0113951	1	-0.0751611	1	0.233079	1	0.0158945	1	-0.00352769	1.47034e-11	0.0834969	1	0.0277973	1	0.138012	1	0.00665378	1	0.144037	1	-0.17181	1	0.122862	1	0.133726	1	-0.046784	1	0.156739	1	-0.0687304	1	0.0600307	0.188472	FALSE	FALSE	0.0278288	2.98718e-24	FALSE
C330027C09Rik	-0.113073	1	-0.109246	1	-0.0463062	1	0.033531	1	-0.0186977	1	-0.0416797	1	-0.0412464	1	0.0515445	1	0.0593025	1	-0.0142604	2.73613e-09	-0.00157634	1	0.00418988	1	0.05276	1	-0.0630418	1	-0.0367036	1	0.0433075	1	-0.0779094	1	0.0853277	1	0.0270457	1	-0.111631	1	0.0326417	1	-0.0136057	0.584241	FALSE	FALSE	-0.0363227	9.93609e-53	FALSE
C77080	-0.0888413	1	0.00101261	1	-0.083892	1	-0.158104	1	-0.193226	1	0.00350768	1	0.12162	1	-0.114882	1	0.0519352	1	-0.0407427	4.47091e-17	0.00563953	1	0.0428775	1	0.0966429	1	0.0519554	1	-0.0797256	1	-0.16388	1	-0.10994	1	-0.254315	1	0.0356944	1	0.0530524	1	0.0259093	1	-0.0379859	0.00121683	FALSE	FALSE	-0.00897254	8.82991e-50	FALSE
C87436	0.131407	1	0.048842	1	-0.0295322	1	0.225113	1	-0.140873	1	-0.025458	1	0.0253064	1	-0.0260672	1	0.0921841	1	0.0015977	1.3205e-06	0.0921192	1	0.00987968	1	0.158227	1	-0.0811525	1	-0.0169902	1	-0.180785	1	0.0683097	1	-0.064272	1	-0.0461769	1	-0.149147	1	-0.00698496	1	0.00407363	0.964047	FALSE	FALSE	0.0218103	1.83776e-25	FALSE
CAAA01118383.1	-0.0645146	1	0.0715247	1	-0.0613536	1	0.0541197	1	0.237368	1	0.0830557	1	0.0194415	1	0.0582068	1	0.0755618	1	0.0176626	5.67319e-06	-0.00112426	1	-0.00881484	1	0.101063	1	-0.0805728	1	-0.10603	1	-0.0347758	1	0.133288	1	-0.126083	1	-0.0553508	1	-0.0127703	1	0.0415089	1	0.0162577	0.987609	FALSE	FALSE	-0.0343169	9.25703e-71	FALSE
Cab39	-0.04139	1	0.0273309	1	-0.194692	1	-0.168342	1	0.0355068	1	-0.185786	0.00848003	-0.152057	1	-0.0637314	1	-0.206624	1	-0.14118	2.22186e-33	-0.00368657	1	-0.0257346	1	-0.157582	1	0.0247787	1	-0.278555	1	-0.00971177	1	-0.157927	1	-0.165407	1	-0.119443	1	-0.0481567	1	-0.133922	1	-0.103158	1.17173e-15	FALSE	FALSE	-0.112915	1.14206e-106	FALSE
Cab39l	0.107177	1	0.227233	1	-0.0133677	1	0.0665534	1	-0.0741711	1	-0.0243331	1	0.0609096	1	0.0458341	1	0.0493998	1	0.0130032	0.00122766	0.00406569	1	0.0527651	1	0.105162	1	0.0543044	1	-0.00389184	1	-0.0662601	1	0.160888	1	-0.0693293	1	-0.115908	1	0.130546	1	-0.191655	0.179733	0.0247108	0.999814	FALSE	FALSE	0.00649847	1.52637e-35	FALSE
Cabin1	-0.250198	1	-0.0883169	1	0.058092	1	-0.0380293	1	0.0138371	1	-0.125266	0.060064	0.104776	1	0.0352191	1	-0.0577945	1	-0.0762136	1.98658e-21	0.0658465	1	0.0997162	1	0.123278	1	0.0185408	1	-0.0554359	1	0.0643477	1	0.0878637	1	-0.184418	1	-0.0913244	1	-0.0629517	1	0.0820812	1	-0.0131595	9.19831e-07	FALSE	FALSE	-0.0643029	2.52603e-86	FALSE
Cacfd1	0.172756	1	0.0233803	1	0.139498	1	0.0894238	1	-0.0356761	1	0.0491247	1	-0.0302883	1	-0.0468587	1	0.0443159	1	-0.0254252	1.02811e-11	0.05964	1	0.0262614	1	-0.0490725	1	0.133269	1	0.0707639	1	0.0583313	1	0.0330673	1	-0.125225	1	0.137327	1	-0.13533	1	0.0364654	1	0.0297976	0.170347	FALSE	FALSE	0.022938	1.81743e-25	FALSE
Cacna1a	0.269876	1	-0.042875	1	-0.0580464	1	-0.0675301	1	-0.180635	1	0.0204493	1	-0.00970131	1	-0.136941	1	0.0575678	1	0.0616976	1	0.0689722	1	0.13849	1	0.112091	1	0.12172	1	0.216588	1	0.0319146	1	0.00886081	1	-0.0209993	1	0.0471812	1	-0.0543299	1	-0.135984	1	0.0213508	1	FALSE	FALSE	0.0797901	0.397156	FALSE
Cacnb3	-0.0255241	1	0.0449411	1	0.0758589	1	-0.111941	1	-0.0618117	1	0.0146602	1	0.124708	1	0.154207	1	-0.0760832	1	-0.00582405	1.73533e-08	-0.0800638	1	0.107388	1	0.152482	1	-0.104514	1	0.00699828	1	-0.0990211	1	0.0426319	1	0.0417455	1	-0.0323491	1	-0.0639865	1	0.117169	1	0.0105557	0.741059	FALSE	FALSE	0.0463824	1.77379e-16	FALSE
Cactin	-0.0174244	1	-0.0604044	1	-0.0994677	1	-0.0456065	1	-0.0112756	1	0.0285991	1	-0.0191463	1	-0.150845	1	0.0139509	1	-0.00717109	9.32683e-06	0.00563254	1	0.0342265	1	0.00361711	1	0.0035571	1	-0.080509	1	-0.1267	1	-0.0532383	1	0.0747594	1	0.0985217	1	-0.017389	1	-0.0701504	1	-0.0236411	0.991916	FALSE	FALSE	-0.0111797	5.08456e-41	FALSE
Cacul1	-0.0602645	1	-0.0437827	1	0.00548226	1	-0.106735	1	-0.149204	1	-0.00344809	1	0.0285149	1	0.0265235	1	-0.0522468	1	-0.0468846	7.33698e-21	-0.0110338	1	-0.228015	0.326804	-0.020147	1	0.0274654	1	-0.0540776	1	-0.164743	1	-0.0892116	1	-0.206243	1	-0.0293209	1	-0.0943711	1	0.0638671	1	-0.0575179	5.63828e-06	FALSE	FALSE	-0.0309665	3.50076e-66	FALSE
Cacybp	-0.210494	1	-0.438023	1	-0.174738	1	-0.20303	1	-0.0416566	1	-0.0995423	1	-0.270796	1	-0.53218	1	-0.302485	1	-0.046107	1	-0.189036	1	-0.209916	1	0.0989948	1	-0.381871	1	-0.0979913	1	0.0893279	1	0.0930709	1	-0.134158	1	-0.177638	1	0.060261	1	-0.326577	1	-0.166409	1	FALSE	FALSE	-0.187179	3.36917e-60	FALSE
Cad	-0.391766	1	-0.0603568	1	0.0179565	1	-0.421118	0.0533777	-0.0925589	1	0.0523074	1	-0.131317	1	-0.109204	1	-0.11137	1	0.0249636	1	-0.131066	1	-0.272136	1	-0.147638	1	0.0181128	1	0.00742874	1	0.11375	1	0.0891608	1	0.127999	1	-0.00890498	1	-0.229508	1	-0.0476231	1	-0.0810899	1	FALSE	FALSE	-0.0508411	4.64719e-47	FALSE
Cadm1	-0.299047	1	-0.294347	1	-0.0376553	1	-0.116834	1	0.311194	1	0.288794	1	-0.0159153	1	0.28162	1	0.26997	1	0.126166	1	0.189856	1	0.151714	1	0.1516	1	0.272377	1	0.425695	1	0.0405622	1	0.326182	1	0.432946	1	0.417728	1	0.222409	1	0.247828	1	0.161564	1	FALSE	FALSE	0.168066	1	FALSE
Calcoco1	-0.0801519	1	0.00240093	1	0.165061	1	0.0198516	1	0.196485	1	0.144241	1	0.21598	1	0.0764375	1	0.104987	1	0.0806141	1	0.120435	1	0.0567576	1	0.170571	1	0.107946	1	0.251416	1	0.0760036	1	-0.0508701	1	0.22618	1	0.17891	1	0.061124	1	-0.0115671	1	0.10061	1	FALSE	FALSE	0.126867	1	FALSE
Cald1	0.00963606	1	-0.0260617	1	0.0641056	1	-0.167544	1	0.0172695	1	0.0737752	1	-0.058624	1	0.0621433	1	0.122622	1	-0.10789	7.61282e-05	0.00612551	1	-0.0187684	1	-0.234416	1	0.138794	1	0.0264839	1	0.0548538	1	0.00077719	1	0.292053	1	-0.167874	1	-0.152254	1	0.0535187	1	-0.000536831	0.999159	FALSE	FALSE	-0.0400716	0.00499668	FALSE
Calm1	0.201306	1	0.082423	1	-0.0086881	1	0.0480468	1	0.487567	1	0.0824457	1	-0.0342812	1	-0.287794	1	0.0766792	1	0.0190885	1	-0.00866566	1	0.0477426	1	-0.210551	1	0.0462258	1	0.0684425	1	0.026347	1	0.394563	1	0.0586189	1	-0.146469	1	0.172504	1	-0.037699	1	0.0513263	1	FALSE	FALSE	-0.0432253	0.00683816	FALSE
Calm2	0.132336	1	-0.331809	1	0.0176643	1	0.191491	1	-0.130875	1	-0.00528986	1	0.148621	1	0.356239	1	0.205834	1	0.129047	0.683041	0.165352	1	0.123157	1	0.125776	1	-0.0933011	1	-0.0723275	1	-0.113669	1	0.11945	1	0.0793691	1	0.162631	1	0.2331	1	-0.22393	1	0.0580412	1	FALSE	FALSE	0.0664039	1	FALSE
Calm3	0.368388	1	-0.511809	1	0.0664212	1	0.0106367	1	-0.118404	1	0.0270831	1	0.00122535	1	-0.295255	1	-0.206195	1	-0.0583506	2.0846e-05	-0.0709035	1	-0.0709081	1	-0.0757121	1	-0.118643	1	-0.204387	1	-0.118352	1	0.0394886	1	-0.240555	1	-0.194681	1	0.131075	1	-0.0647354	1	-0.0811701	0.996264	FALSE	FALSE	-0.0630523	2.36821e-34	FALSE
Calu	-0.067195	1	0.00375116	1	0.099762	1	-0.55181	1	-0.122982	1	0.186781	1	-0.234951	1	-0.163722	1	0.0180967	1	-0.127196	3.74214e-10	-0.0547358	1	-0.135432	1	-0.0831443	1	0.0856514	1	0.0776032	1	0.0927465	1	0.243891	1	-0.0518395	1	0.0202713	1	-0.119703	1	0.0586797	1	-0.0393084	0.410978	FALSE	FALSE	-0.173925	1.88381e-53	FALSE
Camk1	-0.192546	1	-0.0519049	1	-0.0262341	1	-0.198278	1	-0.0828077	1	-0.0291607	1	0.0277511	1	-0.0150229	1	0.143234	1	0.0309522	1	0.0526911	1	0.0284367	1	0.0120558	1	0.104024	1	-0.113524	1	0.18872	1	0.0155908	1	0.212739	1	0.111411	1	0.106088	1	-0.122135	1	0.00962289	1	FALSE	FALSE	0.103432	1	FALSE
Camk2d	-0.0460626	1	0.0889092	1	0.203106	1	-0.0272615	1	-0.0907027	1	-0.0213347	1	0.10797	1	-0.221462	1	0.178092	1	-0.000313712	0.095742	0.0444339	1	0.317641	1	-0.181507	1	0.289051	1	-0.0727645	1	-0.0923434	1	0.200289	1	0.191159	1	0.137541	1	0.0346139	1	-0.0725964	1	0.0460219	1	FALSE	FALSE	0.00101056	2.91424e-18	FALSE
Camk2g	0.0782911	1	0.0686167	1	0.0499147	1	-0.10538	1	0.0994472	1	0.0361485	1	-0.00822612	1	-0.126191	1	0.0102001	1	0.00679187	3.35888e-07	-0.0125593	1	0.00161899	1	0.001115	1	-0.0163086	1	0.0423512	1	0.159635	1	0.123371	1	0.207358	1	-0.0185583	1	0.0515471	1	-0.152284	1	0.0236618	0.920878	FALSE	FALSE	-0.00806088	2.02999e-46	FALSE
Camkk2	-0.170852	1	-0.136349	1	0.060123	1	-0.123884	1	0.0447519	1	-0.0493698	1	-0.0733953	1	0.095655	1	0.053799	1	-0.00393138	2.57495e-05	0.0244822	1	-0.0544596	1	-0.110948	1	0.0183693	1	-0.0961591	1	0.157758	1	0.041993	1	-0.124378	1	0.0592531	1	-0.0370035	1	-0.0657019	1	-0.0233451	0.997004	FALSE	FALSE	-0.0202026	6.05279e-52	FALSE
Camsap1	-0.151762	1	0.0619171	1	-0.0114998	1	0.0136419	1	-0.304581	1	0.0483544	1	-0.0177032	1	0.187147	1	-0.0629831	1	-0.0255585	1.93378e-10	-0.0512273	1	-0.0527462	1	-0.0637805	1	0.038269	1	0.105746	1	-0.200758	1	0.21092	1	0.0906426	1	-0.0729	1	0.244751	1	0.0632103	1	0.00233811	0.35779	FALSE	FALSE	0.0583422	1.01675e-10	FALSE
Camsap2	0.0209023	1	-0.186801	1	-0.180503	1	0.0411067	1	0.0501462	1	-0.061804	1	-0.0253521	1	-0.0361019	1	0.0843164	1	-0.0821177	4.11236e-17	0.0811367	1	-0.0393957	1	-0.0796705	1	-0.177736	1	-0.192773	1	0.0263205	1	-0.00167469	1	0.273326	1	-0.17607	1	0.10436	1	-0.104684	1	-0.0315747	0.00116758	FALSE	FALSE	-0.0347149	1.06583e-54	FALSE
Camta1	0.133114	1	-0.135694	1	-0.123077	1	0.207182	1	-0.104113	1	-0.000609858	1	-0.0742561	1	-0.0373021	1	-0.237022	1	0.00240206	1.75036e-08	-0.0267601	1	-0.0866286	1	-0.039972	1	-0.0234508	1	-0.00834127	1	0.0239027	1	-0.187065	1	-0.329653	1	-0.0751392	1	-0.0562845	1	-0.120581	1	-0.0618738	0.741736	FALSE	FALSE	-0.103509	3.18663e-126	FALSE
Cand1	0.125236	1	0.0688306	1	-0.13011	1	-0.00291101	1	-0.10045	1	0.0695666	1	-0.0290157	1	0.100941	1	0.0642181	1	-0.0594592	2.30534e-19	-0.0521553	1	0.165904	1	0.111126	1	-0.0196328	1	-0.177447	1	0.140939	1	0.0519812	1	-0.132709	1	0.0176447	1	-0.0617708	1	-0.12714	1	0.00112323	7.70648e-05	FALSE	FALSE	-0.0433382	1.0095e-70	FALSE
Cant1	0.0793592	1	-0.136557	1	0.0303357	1	0.0636126	1	-0.17116	1	-0.0197807	1	0.0391958	1	0.0402547	1	0.0568534	1	-0.0180757	2.69115e-13	0.03284	1	0.034264	1	-0.0653761	1	0.0280592	1	-0.106545	1	-0.0285999	1	0.183948	1	-0.0262172	1	0.113412	1	0.0590197	1	-0.0171424	1	0.0081762	0.0521888	FALSE	FALSE	0.00359376	2.79096e-41	FALSE
Canx	-0.145824	1	0.282006	1	-0.0217064	1	0.0559879	1	-0.113401	1	-0.0138382	1	-0.15857	1	-0.237307	1	-0.0911235	1	-0.100785	0.000661545	-0.0784217	1	-0.419168	1	0.141904	1	0.00216564	1	-0.0932146	1	-0.0142561	1	0.0280707	1	0.143915	1	-0.162951	1	0.0412608	1	0.0553368	1	-0.0428533	0.999972	FALSE	FALSE	-0.161928	5.2731e-47	FALSE
Capg	0.434393	1	0.21181	1	0.336855	1	0.207677	1	0.511443	1	0.140259	1	0.181439	1	0.309656	1	0.312933	1	0.198772	4.76061e-09	0.300798	0.285681	0.268523	1	0.189241	1	0.320328	1	0.0692848	1	0.0652471	1	-0.102005	1	0.398882	1	0.0998474	1	-0.0444247	1	0.093527	1	0.214499	0.52221	FALSE	FALSE	0.240359	2.09735e-58	FALSE
Capn1	0.354	1	0.057331	1	0.236301	1	-0.0778378	1	-0.12595	1	-0.00877103	1	0.0112809	1	0.0821822	1	-0.0403692	1	0.0388592	1	0.112718	1	-0.122256	1	0.0642814	1	-0.022306	1	0.134632	1	0.0840151	1	0.0320125	1	-0.110236	1	-0.0920521	1	-0.309322	1	0.134798	1	0.0206339	1	FALSE	FALSE	0.0446221	2.27777e-17	FALSE
Capn15	-0.104302	1	0.183962	1	-0.053054	1	0.174093	1	-0.120449	1	-0.0851193	0.953818	-0.0177727	1	-0.102418	1	-0.0105436	1	-0.0107125	5.77318e-10	-0.0301414	1	-0.0134647	1	0.0884504	1	0.0752025	1	0.0560535	1	-0.277903	1	0.240868	1	-0.113313	1	0.114207	1	0.0151719	1	-0.0177927	1	-0.000427471	0.443466	FALSE	FALSE	-0.0361544	8.39954e-66	FALSE
Capn2	-0.230024	1	-0.0435623	1	-0.0984917	1	0.140577	1	0.102209	1	-0.152591	1	-0.0462496	1	-0.129905	1	-0.214628	1	-0.103573	2.17461e-17	-0.177356	1	-0.275028	0.395315	-0.0400582	1	-0.00218505	1	-0.0358835	1	0.246606	1	-0.11359	1	0.0811707	1	-0.115651	1	-0.163658	1	-0.00386004	1	-0.065511	0.000530353	FALSE	FALSE	-0.0918083	1.96542e-69	FALSE
Capn7	-0.134334	1	-0.162674	1	0.00109852	1	-0.0702233	1	0.21083	1	0.0747357	1	-0.0397725	1	-0.0862416	1	-0.0543205	1	-0.0277246	1.03764e-12	0.0744526	1	-0.0411941	1	-0.017251	1	0.014847	1	-0.0544642	1	0.0628272	1	-0.0177665	1	0.0468084	1	0.105561	1	-0.0440399	1	-0.0327004	1	-0.00912123	0.0834649	FALSE	FALSE	-0.00757171	5.12499e-40	FALSE
Capns1	0.313276	1	-0.0664514	1	0.232078	1	0.0459404	1	0.437421	1	0.00018118	1	-0.0470798	1	0.039062	1	0.198852	1	0.0199319	1	0.0517906	1	0.124916	1	0.0410145	1	0.0813786	1	0.128968	1	0.217968	1	0.212063	1	0.195515	1	0.0311459	1	0.212694	1	0.0911003	1	0.121989	1	FALSE	FALSE	0.0975191	1	FALSE
Caprin1	0.125688	1	0.232164	1	-0.257034	1	-0.0752524	1	-0.0522059	1	0.0261875	1	0.181776	1	-0.284535	1	-0.133638	1	-0.171983	1.23183e-12	0.0722867	1	0.0510275	1	-0.265072	1	-0.112776	1	-0.134657	1	0.467095	1	0.09688	1	-0.218872	1	-0.104438	1	-0.05317	1	0.0242741	1	-0.027917	0.0883724	FALSE	FALSE	0.0368178	1	FALSE
Capza1	-0.0200679	1	0.0690945	1	0.0563412	1	-0.444819	1	-0.306012	1	0.0318307	1	-0.0013042	1	-0.0147737	1	-0.0089871	1	-0.0629406	8.41121e-05	-0.125697	1	0.0264263	1	0.0231962	1	0.0475106	1	-0.167479	1	0.118198	1	-0.0944323	1	-0.0487223	1	0.0984613	1	0.21795	1	-0.197074	1	-0.0382523	0.999261	FALSE	FALSE	-0.101939	3.01382e-41	FALSE
Capza2	0.323688	1	0.0364126	1	-0.129358	1	-0.0180341	1	-0.191763	1	-0.0295832	1	-0.0850111	1	0.0519086	1	0.0894143	1	-0.0260066	1	-0.0841874	1	-0.0713418	1	0.0746182	1	-0.096911	1	-0.200592	1	0.0159007	1	-0.220892	1	-0.0116406	1	0.0319512	1	-0.0653095	1	0.0496159	1	-0.0265296	1	FALSE	FALSE	0.00238438	1	FALSE
Car5b	-0.0958573	1	-0.0830814	1	0.169066	1	-0.105323	1	0.13284	1	0.118906	1	-0.0613235	1	0.0614558	1	-0.00480976	1	0.0402841	1	0.0667485	1	0.131104	1	0.291828	1	0.280821	1	-0.0783562	1	0.163336	1	-0.0765578	1	0.00269634	1	0.0877996	1	0.0417666	1	-0.0771428	1	0.0479143	1	FALSE	FALSE	0.0438478	7.36073e-12	FALSE
Card19	0.212493	1	0.00759635	1	-0.0407547	1	-0.225607	1	-0.792538	1	-0.171258	1	-0.0752772	1	-0.036016	1	-0.257442	1	-0.0174626	0.000343413	0.0351729	1	0.0372087	1	-0.265513	1	-0.175605	1	-0.272713	1	0.0562182	1	-0.0786075	1	-0.100407	1	0.0899648	1	-0.332627	1	-0.0863441	1	-0.118549	0.99991	FALSE	FALSE	0.0426684	6.1702e-07	FALSE
Carhsp1	0.374729	1	0.0402974	1	0.119272	1	0.0294173	1	-0.229802	1	-0.0198717	1	0.0801742	1	0.106253	1	-0.0155386	1	-0.000806046	0.000137487	-0.00458545	1	-0.0690066	1	-0.0875912	1	-0.103136	1	-0.0742219	1	-0.0820647	1	0.131086	1	0.223689	1	0.0549815	1	-0.163157	1	-0.0122098	1	0.0141862	0.999623	FALSE	FALSE	0.0336403	1.159e-17	FALSE
Carm1	-0.216595	1	0.128501	1	-0.16965	1	-0.220996	1	0.0154493	1	0.0102412	1	-0.0697266	1	-0.0417157	1	-0.047064	1	-0.0301994	3.09483e-10	-0.0537897	1	-0.021678	1	-0.0533348	1	-0.154696	0.112652	-0.113048	1	0.0307489	1	-0.0921899	1	0.253817	1	0.0153138	1	0.190183	1	-0.00324304	1	-0.030651	0.237708	FALSE	FALSE	0.00908203	1.28159e-30	FALSE
Carmil1	0.0109059	1	0.100071	1	0.0620859	1	0.278111	1	-0.0301968	1	0.0804552	1	-0.0336354	1	0.319915	1	0.184239	1	-0.0167586	1.33002e-08	-0.013362	1	0.0497412	1	-0.00213539	1	0.0408261	1	0.0207072	1	0.0506018	1	-0.0477779	1	-0.0118743	1	-0.0427004	1	0.0753117	1	-0.0734243	1	0.0476717	0.719828	FALSE	FALSE	0.0318816	1.23171e-09	FALSE
Carnmt1	0.00990417	1	0.119427	1	-0.173415	1	-0.335917	1	0.166669	1	-0.0140923	1	-0.0332407	1	-0.0621613	1	0.065814	1	-0.01822	0.0234423	0.0477448	1	0.0193623	1	0.0620338	1	0.0139574	1	-0.00728979	1	0.327024	1	0.111682	1	-0.134439	1	-0.203851	1	-0.0220487	1	-0.0228787	1	-0.0039969	1	FALSE	FALSE	-0.0977447	2.00918e-54	FALSE
Cars	-0.278428	1	-0.176087	1	-0.0791945	1	-0.0621922	1	-0.0300256	1	-0.0259295	1	-0.0980841	1	-0.125734	1	-0.111614	1	-0.0754878	2.30768e-19	-0.112303	1	-0.0620586	1	-0.0417329	1	0.0735651	1	-0.215192	1	0.11293	1	0.0621519	1	-0.0327286	1	-0.00425251	1	-0.155267	1	-0.158406	1	-0.0760034	7.71078e-05	FALSE	FALSE	-0.0798095	2.19458e-84	FALSE
Cars2	-0.021784	1	-0.11768	1	-0.114185	1	-0.159415	1	-0.00568524	1	-0.0154057	1	0.0165046	1	-0.0628043	1	-0.0735393	1	-0.0424299	1.20552e-17	-0.00693563	1	-0.0104782	1	-0.115646	1	-0.0227346	1	0.0487745	1	-0.0704909	1	0.0807838	1	0.137476	1	0.00382073	1	-0.213036	1	0.0844123	1	-0.0324038	0.000630473	FALSE	FALSE	-0.0304468	1.27798e-59	FALSE
Casc3	-0.0338697	1	-0.00971638	1	-0.151837	1	0.470261	1	0.229491	1	0.111506	1	0.0571834	1	0.0797947	1	0.101259	1	0.0434369	0.00305345	0.0619384	1	-0.0856581	1	-0.0653303	1	0.039019	1	0.0407912	1	0.142892	1	-0.0654447	1	0.274281	1	0.0434594	1	-0.144965	1	-0.0834682	1	0.0502392	0.999999	FALSE	FALSE	0.0799655	3.30265e-08	FALSE
Casc4	0.177776	1	-0.00248575	1	-0.0176382	1	0.0327026	1	0.0386913	1	0.135796	1	0.0818524	1	0.027704	1	-0.0309867	1	-0.0226025	6.53236e-08	0.00716841	1	0.0564341	1	0.193999	1	0.0650357	1	-0.0390874	1	0.33503	1	0.032641	1	-0.14187	1	-0.029014	1	0.147579	1	0.00250349	1	0.0500585	0.835715	FALSE	FALSE	-0.0359553	8.40009e-47	FALSE
Casd1	0.30367	1	-0.200815	1	0.00313894	1	-0.0679977	1	-0.282402	1	0.0355378	1	0.0282699	1	0.0772478	1	0.031311	1	-0.0304097	1.37732e-12	0.0393331	1	0.0012929	1	0.012087	1	0.117984	1	-0.0639803	1	0.211332	1	0.0836484	1	0.0361894	1	0.000411372	1	-0.0900593	1	0.0789342	1	0.015463	0.091691	FALSE	FALSE	0.000838038	1.27222e-45	FALSE
Cask	0.0476921	1	0.08042	1	0.00284583	1	0.194172	1	0.026223	1	0.0520881	1	-0.0233919	1	-0.178651	1	0.104673	1	-0.0115649	4.2823e-11	0.027854	1	0.12885	1	-0.17225	1	0.088474	1	-0.0102123	1	-0.145501	1	-0.10428	1	0.0594773	1	-0.0291908	1	-0.202306	1	-0.115945	1	-0.00859635	0.250584	FALSE	FALSE	-0.00463275	1.18458e-44	FALSE
Casp1	0.209618	1	0.279679	1	0.713491	1	0.141735	1	0.112498	1	0.313925	1	0.103581	1	0.637225	0.882181	0.200048	1	0.271627	4.89731e-10	0.332635	1	0.36074	1	0.277868	1	0.382384	1	0.573439	1	0.463496	1	0.132201	1	0.43657	1	0.102018	1	0.397347	1	0.202015	1	0.316388	0.422957	FALSE	FALSE	0.281815	2.25117e-13	FALSE
Casp3	0.0638899	1	0.0318977	1	-0.0427942	1	0.054652	1	0.555721	1	0.2695	1	0.0300256	1	-0.0308423	1	0.059711	1	0.0588923	1	0.137843	1	0.385396	1	0.0819987	1	0.277145	1	0.340042	1	0.440945	1	0.0895811	1	-0.0296007	1	0.067212	1	-0.0532429	1	0.0490464	1	0.135096	1	FALSE	FALSE	0.0868921	1	FALSE
Casp6	0.0591002	1	-0.0363652	1	0.0248634	1	-0.112725	1	0.321366	1	0.0469302	1	-0.0105669	1	0.197758	1	0.00320046	1	0.0153989	3.81478e-06	0.13544	1	0.108978	1	0.262114	1	-0.0990537	1	-0.0762614	1	-0.029382	1	0.00430085	1	0.172832	1	-0.0109267	1	-0.0828472	1	-0.0336269	1	0.0409775	0.983	FALSE	FALSE	0.0648983	2.98526e-12	FALSE
Casp8	-0.166336	1	-0.115758	1	-0.0430594	1	-0.36267	0.135455	0.27379	1	0.101131	1	-0.0616034	1	0.157005	1	0.0037349	1	-0.0376771	1.06832e-10	0.124421	1	-0.058977	1	-0.0695537	1	-0.0961125	0.553402	0.0705128	1	-0.141568	1	0.134693	1	0.019989	1	-0.0870669	1	0.0235347	1	-0.210235	1	-0.0258003	0.158469	FALSE	FALSE	-0.028774	5.61253e-57	FALSE
Casp8ap2	-0.0332547	1	-0.367611	1	-0.0616062	1	0.103783	1	-0.00317435	1	0.116903	1	-0.0925033	1	-0.100496	1	0.206491	1	0.0236268	0.0138259	-0.136543	1	0.148733	1	-0.0615058	1	0.105705	1	0.0952872	1	0.283666	1	0.251478	1	-0.0534017	1	-0.0248842	1	-0.0547202	1	0.158805	1	0.024037	1	FALSE	FALSE	-0.0530331	3.47095e-55	FALSE
Cat	0.0314619	1	-0.129327	1	0.115344	1	-0.00326942	1	-0.0542724	1	0.00502739	1	0.208802	1	-0.0869159	1	-0.0258436	1	0.00128037	5.79317e-07	0.0602741	1	0.0813521	1	-0.0256362	1	-0.032931	1	-0.0838521	1	0.0750476	1	-0.106752	1	0.179758	1	0.0790259	1	0.0029849	1	-0.0177609	1	0.0130379	0.940938	FALSE	FALSE	0.0375694	4.99973e-13	FALSE
Cav1	-0.079712	1	0.544169	1	-0.216943	1	0.0218788	1	0.232939	1	0.514292	0.0258851	0.213461	1	-0.092512	1	0.188326	1	0.177818	1	0.145866	1	0.19772	1	0.00289105	1	0.223967	1	0.0298998	1	0.2213	1	-0.115325	1	0.430398	1	0.362976	1	0.223582	1	0.172658	1	0.161888	1	FALSE	FALSE	0.11582	1	FALSE
Cav2	-0.0400578	1	0.109674	1	-0.10583	1	-0.107827	1	-0.294233	1	-0.027975	1	-0.0820363	1	0.214497	1	-0.180228	1	-0.00975473	9.08128e-09	-0.0126944	1	0.0565002	1	0.00578292	1	0.078118	1	-0.0995486	1	-0.0139125	1	-0.0209893	1	0.298511	1	0.0875263	1	-0.200668	1	-0.056286	1	-0.0191157	0.688366	FALSE	FALSE	-0.0456411	9.255e-63	FALSE
Cavin1	0.0169815	1	0.156567	1	0.112672	1	-0.216952	1	-0.0533666	1	0.0138619	1	0.0577327	1	-0.315985	1	-0.119179	1	-0.029125	6.22252e-05	-0.070326	1	0.17494	1	-0.116355	1	0.0387329	1	0.202622	1	0.0897686	1	-0.0556779	1	0.0967433	1	-0.0309258	1	-0.0858105	1	0.0224858	1	-0.0052665	0.998915	FALSE	FALSE	0.0451469	1.46938e-08	FALSE
Cavin4	-0.0562274	1	0.470319	1	-0.0169474	1	0.146056	1	0.224923	1	0.102479	1	0.109175	1	0.0573275	1	0.0175254	1	0.0292254	1	-0.0442948	1	-0.10495	1	-0.0331517	1	0.0809763	1	-0.0158302	1	-0.0350068	1	-0.160463	1	-0.220512	1	-0.0245937	1	0.0710053	1	-0.0589479	1	0.0256232	1	FALSE	FALSE	-0.0696073	2.90063e-61	FALSE
Cbfa2t2	-0.022088	1	-0.0887028	1	0.027889	1	0.110924	1	-0.0907466	1	0.0243616	1	-0.0106542	1	-0.187533	1	0.0149851	1	-0.0145212	1.50611e-08	-0.0996572	1	-0.00406876	1	-0.0132066	1	0.0283413	1	-0.0342452	1	-0.028493	1	-0.105778	1	0.0733364	1	0.0213031	1	-0.112761	1	-0.0944407	1	-0.0288455	0.72983	FALSE	FALSE	0.0185795	1.43553e-14	FALSE
Cbfb	-0.271028	1	-0.122604	1	-0.25236	1	-0.26301	1	-0.291302	1	-0.102905	1	-0.102454	1	-0.275701	1	-0.274887	0.335584	-0.107773	1.30606e-30	0.0259952	1	-0.0748819	1	-0.0728602	1	-0.165921	0.398995	-0.0350908	1	-0.108688	1	-0.159566	1	-0.0794188	1	-0.0577548	1	-0.236652	1	-0.0594116	1	-0.147061	1.00187e-12	FALSE	FALSE	-0.117187	9.02677e-126	FALSE
Cbl	0.264778	1	0.0123583	1	-0.0314622	1	-0.15354	1	0.0435526	1	0.0466514	1	-0.109687	1	0.0498187	1	0.022323	1	-0.0295243	8.41505e-14	-0.0762542	1	-0.0580507	1	-0.14753	1	0.101624	1	0.0685977	1	-0.0814113	1	-0.0245286	1	-0.0359329	1	-0.109202	1	-0.20869	1	0.0496919	1	-0.0193532	0.0338857	FALSE	FALSE	-0.0172689	7.97595e-51	FALSE
Cblb	-0.0342883	1	0.0838698	1	-0.203568	1	-0.0459802	1	0.0967392	1	0.0888198	1	0.0465178	1	0.256526	1	0.0548814	1	-0.0215114	6.01137e-11	0.111296	1	-0.0291998	1	-0.12663	1	0.119417	1	0.0811725	1	0.231202	1	-0.208414	1	-0.212717	1	0.0563514	1	0.0148823	1	0.0432425	1	0.0191719	0.272774	FALSE	FALSE	0.0310194	8.25861e-21	FALSE
Cbll1	-0.193792	1	-0.0550465	1	-0.0301798	1	0.000165759	1	0.0289939	1	0.0394655	1	0.0560934	1	0.110697	1	0.0329436	1	-0.0437199	3.2761e-17	-0.00894086	1	0.0367337	1	-0.0307624	1	-0.00805098	1	-0.110863	1	-0.244918	1	-0.0554107	1	0.208489	1	0.127058	1	-0.055597	1	-0.109325	1	-0.0145699	0.00104303	FALSE	FALSE	-0.0108279	1.49176e-51	FALSE
Cbr1	-0.0686674	1	0.0141095	1	-0.0377071	1	-0.000674737	1	-0.175026	1	0.121183	1	0.00369602	1	-0.000870725	1	-0.0830734	1	-0.000640243	5.8385e-08	-0.0396607	1	-0.0412324	1	0.0821686	1	0.00677755	1	0.0257585	1	-0.0164255	1	-0.0523163	1	-0.196505	1	-0.15441	1	0.11854	1	0.110102	1	-0.0183274	0.828519	FALSE	FALSE	0.000472334	7.86755e-43	FALSE
Cbr4	0.00149709	1	-0.0411616	1	0.0427802	1	0.0146235	1	-0.112117	1	-0.00443049	1	0.13638	1	0.264663	1	-0.0846149	1	0.00896646	0.000805334	0.0668387	1	0.121981	1	0.0175371	1	0.11609	1	0.116507	1	0.336826	1	0.00911087	1	-0.0430194	1	-0.0117978	1	-0.120795	1	-0.15672	1	0.0323403	0.999981	FALSE	FALSE	0.0437318	4.15298e-10	FALSE
Cbwd1	-0.203464	1	0.0610357	1	-0.198027	1	-0.12899	1	0.00240111	1	-0.00751106	1	0.0240142	1	0.0546836	1	-0.0939287	1	-0.0267657	2.1408e-11	0.00914529	1	-0.00464467	1	-0.0671231	1	-0.0472664	1	-0.0851239	1	0.113516	1	0.0515786	1	0.128415	1	-0.0783863	1	-0.186438	1	-0.051403	1	-0.0349658	0.208936	FALSE	FALSE	-0.0533332	1.59776e-79	FALSE
Cbx1	-0.106085	1	-0.174984	1	-0.0257894	1	0.0885634	1	-0.121679	1	-0.13693	1	-0.0161527	1	-0.168056	1	0.0997267	1	0.0387273	1	-0.00466438	1	0.0360769	1	-0.176021	1	0.0784801	1	0.0531473	1	0.150668	1	-0.0336347	1	0.00531719	1	-0.0361247	1	-0.331459	1	-0.0604539	1	-0.0400632	1	FALSE	FALSE	0.179238	5.79757e-09	FALSE
Cbx3	-0.315849	1	0.126275	1	0.0930315	1	0.312296	1	0.5194	1	0.0762645	1	0.13999	1	0.158482	1	0.299798	1	0.165186	0.00768579	0.132409	1	0.073783	1	0.0392664	1	-0.0018412	1	0.302238	1	-0.089568	1	0.204278	1	0.24701	1	0.0358512	1	0.0947717	1	-0.0605341	1	0.121549	1	FALSE	FALSE	0.165374	7.38678e-14	FALSE
Cbx5	0.188883	1	0.180995	1	0.00357894	1	-0.0839741	1	0.0205052	1	0.134669	1	0.0874528	1	0.0754063	1	0.0738491	1	0.0760262	1	0.0909946	1	-0.1523	1	-0.126726	1	0.146593	1	0.0858563	1	0.0401515	1	-0.0509379	1	0.458517	1	0.078278	1	0.0822333	1	0.0126181	1	0.0677461	1	FALSE	FALSE	0.0846603	1	FALSE
Cbx6	-0.0873288	1	-0.107901	1	0.0785961	1	0.0249296	1	-0.0895959	1	0.00766471	1	0.00490028	1	-0.0569885	1	0.0148487	1	-0.0149818	9.61817e-12	0.015868	1	-0.118645	1	-0.0761401	1	0.0496618	1	0.00344459	1	-0.0914659	1	0.202909	1	-0.0938168	1	-0.0138198	1	0.0060121	1	-0.0806068	1	-0.0201169	0.167116	FALSE	FALSE	-0.00997536	4.28766e-44	FALSE
Cby1	0.0872887	1	-0.158816	1	-0.105217	1	0.0173191	1	0.191925	1	-0.0671342	0.00808652	-0.0870555	1	-0.0635541	1	0.0808078	1	0.0248787	0.0016745	-0.04587	1	0.0159454	1	-0.0882002	1	0.0283602	1	-0.0617685	1	0.166078	1	0.21055	1	-0.144849	1	-0.0028063	1	-0.00299064	1	-0.0391891	1	-0.00210942	0.994273	FALSE	FALSE	-0.00359861	1.63705e-46	FALSE
Cc2d1b	0.0867144	1	-0.07134	1	0.064663	1	0.110575	1	-0.158388	1	0.0495184	1	0.0355148	1	-0.143199	1	-0.151715	1	0.00317417	0.000343185	0.0333388	1	-0.121196	1	-0.0604397	1	0.0532165	1	0.0156112	1	0.1393	1	0.169282	1	-0.00253618	1	0.0273766	1	0.0172171	1	0.0991844	1	0.0093273	0.99991	FALSE	FALSE	-0.0114654	7.36551e-48	FALSE
Cc2d2a	-0.0984362	1	0.104832	1	0.0560753	1	-0.162022	1	0.0971677	1	0.009117	1	0.0108219	1	0.269456	1	-0.0361262	1	0.00392173	1.32652e-05	0.124295	1	-0.11309	1	-0.0362923	1	0.0845054	1	-0.102752	1	0.264585	1	0.0896765	1	0.282576	1	0.056868	1	-0.0240115	1	0.0727436	1	0.0454243	0.99416	FALSE	FALSE	0.0234689	1.05599e-21	FALSE
Ccar1	-0.0727586	1	0.367355	1	0.0305171	1	0.273507	1	0.131014	1	0.102908	1	-0.0144826	1	-0.0988143	1	-0.217632	1	0.0178916	1	-0.113178	1	-0.213614	1	0.0610081	1	0.0503518	1	0.0850702	1	0.00201328	1	0.0951818	1	0.0742797	1	-0.0253469	1	0.0776521	1	0.0218108	1	0.0302254	1	FALSE	FALSE	0.0240651	3.28745e-06	FALSE
Ccdc102a	0.242211	1	0.0914046	1	-0.0100696	1	0.0730443	1	0.0267202	1	-0.0268629	1	-0.0686465	1	0.188144	1	0.00455421	1	-0.0356992	6.57485e-12	0.0161643	1	-0.0653712	1	-0.00518657	1	0.0289471	1	-0.011085	1	0.228461	1	-0.0663383	1	0.0332892	1	-0.100899	1	0.00991569	1	0.027781	1	0.0276418	0.149535	FALSE	FALSE	-0.0350432	1.21012e-63	FALSE
Ccdc107	-0.0938579	1	-0.202066	1	0.065981	1	0.163636	1	0.442969	1	0.0268904	1	-0.104391	1	-0.199119	1	-0.252478	1	-0.00821806	4.11943e-06	-0.154931	1	-0.00906547	1	0.0270815	1	0.0385877	1	0.0263257	1	0.255391	1	-0.0107567	1	-0.463387	1	-0.264288	1	-0.141732	1	0.213152	1	-0.0306797	0.983984	FALSE	FALSE	-0.140954	3.18468e-99	FALSE
Ccdc112	-0.0223641	1	0.223091	1	-0.00956835	1	-0.0940313	1	0.123489	1	0.0896567	1	-0.00509096	1	-0.143099	1	0.021367	1	-0.0361711	2.9568e-11	-0.0256517	1	0.00967549	1	0.0260232	1	-0.0689151	1	-0.0907188	1	-0.173218	1	-0.0092782	1	-0.0125986	1	-0.0711312	1	-0.0190261	1	-0.0381306	1	-0.0155091	0.227709	FALSE	FALSE	-0.0446267	1.55231e-72	FALSE
Ccdc115	0.129774	1	0.112075	1	-0.239906	1	0.0934986	1	-0.00470421	1	-0.0352722	1	-0.0200722	1	-0.0874431	1	-0.0287679	1	0.0116782	1.56803e-06	-0.0491841	1	-0.00338569	1	-0.0397483	1	0.00229514	1	-0.0441153	1	0.30977	1	0.0477947	1	0.0984722	1	-0.00838018	1	-0.0357661	1	0.0559815	1	0.0125997	0.967871	FALSE	FALSE	-0.0274407	3.1009e-59	FALSE
Ccdc12	0.117865	1	0.102147	1	0.125436	1	0.146245	1	0.24646	1	-0.0540695	1	-0.119093	1	0.0484105	1	0.0432036	1	0.0738187	1	0.0793877	1	0.0595523	1	0.162389	1	-0.218049	1	0.0463415	1	-0.229461	1	0.0156702	1	0.316403	1	-0.0900136	1	-0.00673693	1	0.087963	1	0.0454224	1	FALSE	FALSE	0.0793178	1	FALSE
Ccdc122	0.0707577	1	0.364057	1	0.121871	1	0.00989853	1	0.0249297	1	0.0748726	1	0.119291	1	0.19315	1	0.10146	1	0.0428788	1	0.0364867	1	0.082286	1	0.124023	1	0.178111	1	0.0713617	1	0.0122756	1	-0.0118641	1	0.0317699	1	0.106646	1	0.0518856	1	-0.0720822	1	0.0825746	1	FALSE	FALSE	0.0692378	0.00628215	FALSE
Ccdc124	-0.0219229	1	-0.169674	1	-0.0748223	1	-0.162906	1	0.178356	1	-0.110263	1	-0.228468	1	-0.442844	1	-0.0204701	1	-0.0128498	1	-0.0281925	1	0.046836	1	0.0597567	1	-0.217057	1	-0.0404086	1	0.137066	1	0.0326276	1	-0.15118	1	-0.261223	1	0.158313	1	-0.266389	1	-0.0759864	1	FALSE	FALSE	-0.186237	4.74019e-79	FALSE
Ccdc126	-0.0202122	1	-0.128519	1	0.0420486	1	-0.104757	1	-0.0403685	1	-0.00839063	1	0.0567336	1	0.0930677	1	-0.0165327	1	-0.00846065	4.67702e-08	-0.031479	1	-0.0214643	1	-0.0624893	1	-0.000618211	1	-0.0209787	1	-0.197348	1	-0.0234666	1	-0.102441	1	0.0308192	1	0.0153042	1	-0.00392649	1	-0.0263561	0.813825	FALSE	FALSE	-0.0203023	1.09483e-44	FALSE
Ccdc127	0.0469346	1	-0.188512	1	0.0149264	1	-0.0736778	1	-0.217427	1	0.171951	1	-0.0340005	1	0.162791	1	0.0288013	1	0.0790435	1	-0.0112373	1	0.0619547	1	0.0298467	1	-0.104114	1	-0.138393	1	-0.193911	1	0.0745687	1	0.0275331	1	0.104461	1	-0.0613993	1	-0.0840016	1	-0.0144696	1	FALSE	FALSE	0.131725	1	FALSE
Ccdc130	0.0154095	1	0.122232	1	0.071537	1	-0.0328731	1	-0.110795	1	0.0259002	1	-0.00671187	1	-0.0524775	1	0.0386954	1	0.00254524	0.000126062	-0.033391	1	0.0274077	1	0.0674291	1	0.0228694	1	-0.0939546	1	0.0438761	1	-0.0320703	1	-0.103671	1	0.0671002	1	0.0314105	1	-0.0378352	1	0.00155396	0.999574	FALSE	FALSE	-0.01818	1.18871e-45	FALSE
Ccdc137	-0.11685	1	0.0624444	1	0.0497846	1	-0.10903	1	-0.0824975	1	0.145024	1	-0.0158624	1	-0.0358882	1	0.00771281	1	0.053361	0.935117	0.0648927	1	-0.140164	1	0.116911	1	0.188057	1	0.0563357	1	-0.155486	1	0.109497	1	0.171104	1	0.0253076	1	0.00165228	1	-0.0247744	1	0.017692	1	FALSE	FALSE	0.0180067	5.45797e-26	FALSE
Ccdc15	-0.00726368	1	0.0287466	1	0.130075	1	0.0577589	1	-0.129451	1	-0.0295448	1	0.0870094	1	-0.110492	1	0.0105393	1	-0.0138021	3.03622e-11	0.0870217	1	0.166014	1	-0.0210913	1	-0.109543	0.353324	0.112229	1	-0.0507617	1	-0.0732663	1	0.0357495	1	0.0171158	1	-0.0532755	1	0.0244362	1	0.00753355	0.172432	FALSE	FALSE	0.00142519	9.88298e-38	FALSE
Ccdc167	0.0282751	1	-0.0895098	1	-0.0893976	1	-0.0337352	1	-0.00912158	1	-0.0222702	1	-0.00174596	1	0.157913	1	0.0156144	1	0.0192969	0.0217094	0.00504854	1	-0.00168946	1	0.0329653	1	0.0264454	1	0.0379942	1	-0.172224	1	0.0822962	1	0.0725265	1	-0.0499074	1	-0.0321702	1	-0.0359533	1	-0.00282617	1	FALSE	FALSE	-0.0216746	2.81297e-49	FALSE
Ccdc174	0.134517	1	-0.0544912	1	-0.0150608	1	0.104693	1	-0.0841896	1	0.0279862	1	0.0653144	1	0.2167	1	0.182558	1	0.05811	1	-0.10657	1	-0.0994871	1	-0.152224	1	0.0255241	1	-0.0732311	1	-0.210455	1	-0.122549	1	0.0425576	1	0.197757	1	0.0298715	1	-0.129732	1	0.00179046	1	FALSE	FALSE	0.0334185	2.35088e-16	FALSE
Ccdc18	-0.138958	1	0.0191582	1	-0.0965382	1	-0.0623807	1	-0.143624	1	0.0230047	1	0.0892838	1	0.0125395	1	0.111152	1	-0.168751	1.71589e-24	-0.0118154	1	-0.0228049	1	-0.167493	1	0.00700662	1	0.0441884	1	0.191822	1	-0.159196	1	0.076448	1	0.0121056	1	-0.00962196	1	-0.0275697	1	-0.0200974	6.34728e-08	FALSE	FALSE	-0.0358941	6.37067e-36	FALSE
Ccdc181	0.0279572	1	-0.108845	1	-0.00158056	1	-0.144629	1	0.060917	1	0.0654483	1	0.0263626	1	-3.41006e-06	1	0.0892851	1	0.0189297	0.00618733	0.135182	1	0.0491089	1	0.0644283	1	0.0785512	1	0.124158	1	0.0871581	1	-0.0303373	1	0.0341869	1	-0.0837716	1	0.106475	1	0.0636113	1	0.031552	1	FALSE	FALSE	0.0287205	2.22855e-18	FALSE
Ccdc186	0.20697	1	0.000265879	1	-0.10356	1	-0.134042	1	-0.262143	1	-0.0103831	1	0.164095	1	0.078095	1	-0.0262513	1	-0.0474739	1.7049e-17	-0.125362	1	-0.130203	1	-0.021269	1	-0.123148	1	0.0241855	1	-0.121058	1	-0.0820956	1	0.0882248	1	-0.0205032	1	-0.110098	1	-0.210238	1	-0.0459996	0.000751703	FALSE	FALSE	-0.0551336	2.08075e-76	FALSE
Ccdc191	-0.141104	1	-0.0150077	1	0.11292	1	-0.0650603	1	0.0249541	1	-0.0379265	1	0.0483346	1	-0.100642	1	0.0764442	1	0.024023	0.0181132	0.0636176	1	-0.0752082	1	-0.0932113	1	0.0323929	1	-0.0917868	1	0.241308	1	0.238147	1	0.00012041	1	0.051258	1	0.045474	1	0.0217744	1	0.0171819	1	FALSE	FALSE	0.032054	1.8592e-11	FALSE
Ccdc22	-0.0129311	1	-0.0909179	1	0.00300878	1	0.231303	1	-0.00448619	1	0.0489273	1	-0.010139	1	0.0604859	1	0.225603	1	0.00342048	8.66985e-05	-0.0463496	1	-0.0269704	1	0.267026	1	0.0488679	1	0.12886	1	0.0938326	1	0.00397294	1	-0.159324	1	0.024045	1	0.098596	1	0.171795	1	0.0504107	0.99929	FALSE	FALSE	0.0309732	9.99777e-24	FALSE
[truncated: 5,879 more rows]
[truncated: 7 more columns]

## Sheet: DTXvsVEH_4T1
gene	logFC.Clone350_ExptC	adj.p.Clone350_ExptC	logFC.Clone679_ExptC	adj.p.Clone679_ExptC	logFC.Clone684_ExptC	adj.p.Clone684_ExptC	logFC.Clone523_ExptC	adj.p.Clone523_ExptC	logFC.Clone473_ExptC	adj.p.Clone473_ExptC	logFC.Clone350_ExptD	adj.p.Clone350_ExptD	logFC.Clone679_ExptD	adj.p.Clone679_ExptD	logFC.Clone684_ExptD	adj.p.Clone684_ExptD	mean.logFC_ExptC	mean.logFC_ExptD	fisher.combined.pvalue_ExptC	fisher.combined.pvalue_ExptD	mean.logFC.clonal	sig.down.clonal	sig.up.clonal	logFC.bulk_ExptC	adj.p.bulk_ExptC	logFC.bulk_ExptD	adj.p.bulk_ExptD	mean.logFC.bulk	sig.down.bulk	sig.up.bulk	clonal.up.only	bulk.up.only	up.both	clonal.down.only	bulk.down.only	down.both
[truncated: 10,360 more rows]

[truncated: 1 more sheets: JQ1vsVEH_4T1]
