# Supplementary material for: Clonal transcriptomics identifies mechanisms of chemoresistance and empowers rational design of combination therapies
Source: bioRxiv preprint, doi:10.1101/2021.12.09.471927, version 2 (2022-06-10)
Supplement: Supplementary Table 14 [file 471927_file03.xlsx]

## Sheet: combined_veh_DTX_Asparaginase_t
gene	logFC.118_DA1vsDTX	adjp.118_DA1vsDTX	logFC.118_DA2vsDTX	adjp.118_DA2vsDTX	logFC.118_DA2vsDTX	adjp.118_DA1vsDTX	logFC.1240_DA1vsDTX	adjp.1240_DA1vsDTX	logFC.1240_DA2vsDTX	adjp.1240_DA2vsDTX	logFC.1240_DA3vsDTX	adjp.1240_DA3vsDTX	logFC.2323_DA1vsDTX	adjp.2323_DA1vsDTX	logFC.2323_DA2vsDTX	adjp.2323_DA2vsDTX	logFC.2323_DA3vsDTX	adjp.2323_DA3vsDTX	logFC.2874_DA1vsDTX	adjp.2874_DA1vsDTX	logFC.2874_DA2vsDTX	adjp.2874_DA2vsDTX	logFC.2874_DA3vsDTX	adjp.2874_DA3vsDTX	logFC.2991_DA1vsDTX	adjp.2991_DA1vsDTX	logFC.2991_DA2vsDTX	adjp.2991_DA2vsDTX	logFC.2991_DA3vsDTX	adjp.2991_DA3vsDTX	fisher.pvalue_combined.clones_DA1vsDTX	mean.logFC_combined.clones_DA1vsDTX	fisher.pvalue_combined.clones_DA2vsDTX	mean.logFC_combined.clones_DA2vsDTX	fisher.pvalue_combined.clones_DA3vsDTX	mean.logFC_combined.clones_DA3vsDTX	mean.logFC_DTX+Asp.vs.DTX	mean.logFC_DTX+Asp.vs.Vehicle	Meets.cutoffs?
Fos	0.896021	7.84364e-07	0.829595	4.09122e-23	1.05525	2.05687e-18	0.652445	2.44586e-29	0.630539	3.0958e-10	0.645129	4.27498e-11	0.777355	4.8438e-22	0.830784	4.24581e-29	0.839049	2.59906e-29	0.644555	1	0.612912	1	0.493565	1	0.564601	1	0.830465	1	0.624891	1	1.10687e-49	0.706995	8.55527e-54	0.746859	2.84155e-50	0.731577	0.728477	0.929447	TRUE
Jun	0.849704	2.51992e-09	0.78712	8.00041e-25	0.844239	7.2329e-13	0.50953	2.34275e-21	0.692567	1.20683e-12	0.54278	7.49343e-07	0.293774	0.0539186	0.699439	3.59715e-27	0.716329	1.06326e-23	0.658998	1	0.198706	1	0.504039	0.514588	0.33848	1	0.59319	1	0.655134	1	3.41685e-25	0.530097	6.36675e-56	0.594204	1.07761e-35	0.652504	0.592269	0.734131	TRUE
Egr1	0.851695	6.24591e-13	0.816955	8.45243e-36	0.632117	1.20056e-08	0.415377	2.1391e-14	0.534431	1.03137e-06	0.479422	0.000909119	0.518897	6.34089e-13	0.791314	1.30999e-36	0.619646	3.47043e-12	0.221919	1	0.264266	1	0.443445	1	0.579737	1	0.682749	1	0.498648	1	2.18319e-32	0.517525	4.79553e-70	0.617943	1.21338e-17	0.534656	0.556708	0.606371	TRUE
Malat1	0.549165	0.000302326	0.242444	0.0153891	0.472602	0.00831555	0.531945	6.39372e-23	0.353352	0.00066465	0.392266	0.000112311	0.65373	4.05327e-25	0.574675	1.72835e-23	0.545744	3.15224e-17	0.753558	1	0.401052	1	0.184263	1	0.795317	8.32213e-05	0.452283	1	0.425951	1	6.79977e-48	0.656743	1.3089e-22	0.404761	9.61241e-18	0.404165	0.488556	0.383204	TRUE
Atf3	0.860751	0.000170386	0.604447	6.65835e-15	0.825806	8.27413e-10	0.3749	3.16819e-07	0.560749	1.63318e-05	0.540677	0.657161	0.508701	3.64185e-05	0.626976	7.55045e-13	0.748314	1.25064e-16	-0.0219768	1	0.0268795	1	0.176769	1	0.00670665	1	0.125108	1	0.5426	1	1.21627e-10	0.345816	9.50319e-26	0.388832	3.42786e-20	0.566833	0.433827	0.39998	TRUE
Neat1	0.482714	0.00606089	0.519231	4.21345e-16	0.438488	0.000376353	0.424512	2.03146e-18	0.219671	1	0.252712	1	0.441984	8.2218e-15	0.475418	3.11789e-20	0.481002	7.02818e-11	0.715156	0.372738	1.01587	1	0.0733891	1	0.368116	1	0.397711	1	0.189464	1	6.53081e-29	0.486496	2.39567e-29	0.52558	1.20137e-09	0.287011	0.433029	0.595969	TRUE
Ier2	0.452298	0.00476854	0.341914	2.22911e-10	0.410559	0.00218738	0.228605	4.0673e-05	0.247607	0.059205	0.155964	1	0.447452	1.02938e-14	0.488386	6.72633e-21	0.320055	1.55497e-08	0.644364	0.602844	0.430025	1	0.196905	1	0.401878	1	0.358243	1	0.141398	1	2.93853e-16	0.434919	1.02305e-25	0.373235	5.6855e-07	0.244976	0.351043	0.606815	TRUE
Jund	0.370561	0.290188	0.539345	4.43701e-23	0.531455	3.164e-10	0.311303	8.14586e-14	0.391253	3.97103e-06	0.391439	6.07592e-05	0.285417	7.62702e-05	0.403055	2.5293e-13	0.38723	5.97379e-12	0.200018	1	0.0480001	1	0.334719	1	0.0864969	1	0.347201	1	0.376694	1	2.31404e-13	0.250759	1.4453e-34	0.345771	5.58598e-20	0.404307	0.333613	0.366479	TRUE
Ahnak	0.27363	0.497751	0.262538	1.34566e-05	0.310314	0.0503644	0.377447	7.6674e-27	0.186605	1	0.109798	1	0.419204	8.37002e-22	0.240322	3.17491e-08	0.228068	0.00166925	0.635659	1	0.636496	1	0.0412629	1	0.566111	0.00928684	0.224277	1	0.37048	1	2.16604e-43	0.45441	1.35449e-08	0.310048	0.0433144	0.211984	0.325481	0.343175	TRUE
Asns	0.463519	4.73456e-09	0.408563	7.90643e-16	0.615578	5.80629e-15	0.238851	3.16119e-15	0.358729	1.24232e-07	0.309654	6.10598e-06	0.286392	2.10606e-13	0.255852	3.39083e-12	0.35566	5.07559e-14	0.458606	1	0.0861055	1	0.472254	0.00931119	0.0376608	1	0.175362	1	0.207148	1	6.16232e-30	0.297006	5.16425e-28	0.256922	3.01906e-29	0.392059	0.315329	0.325546	TRUE
Eif3c	0.487869	3.83373e-14	0.242951	1.34015e-07	0.567507	1.27795e-16	0.276201	1.64346e-25	0.0927433	1	0.356437	1.51116e-11	0.313571	5.6655e-21	0.144605	0.137515	0.376596	7.86955e-25	0.548799	0.000667807	0.213191	1	0.443987	0.0103582	0.182223	1	0.0447598	1	0.351272	1	4.14203e-55	0.361732	9.78668e-05	0.14765	1.48166e-46	0.41916	0.309514	0.222103	TRUE
Gm26532	0.173341	0.000127298	0.304823	7.99155e-20	0.234887	0.0178193	0.279547	3.5467e-40	0.339475	2.00003e-19	0.270245	1	0.322364	2.36528e-31	0.336072	2.34124e-31	0.273918	1.08126e-05	0.377685	0.212511	0.259141	1	0.137538	1	0.507471	0.000157409	0.3113	1	0.177288	1	1.6202e-71	0.332082	9.85752e-62	0.310162	0.0006038	0.218775	0.287006	0.301269	TRUE
Tcim	0.0831493	1	0.353911	2.21887e-11	0.142025	1	0.140426	2.04318e-05	0.332761	1.89212e-05	0.245613	1	0.227745	0.074634	0.519891	2.53573e-28	0.318296	6.46188e-06	0.299662	1	0.195322	1	0.040003	1	0.395976	0.600861	0.570414	0.371151	0.334633	1	0.00193898	0.229392	1.71014e-37	0.39446	0.00787254	0.216114	0.279989	0.232133	TRUE
Emp1	0.196334	1	0.124562	0.0660599	0.203345	1	0.216528	1.37177e-05	0.105199	1	0.333849	0.0017119	0.24241	0.000596287	0.25003	1.23603e-08	0.244584	6.51644e-05	0.51743	1	0.0152437	1	0.253981	1	0.306986	1	0.439752	1	0.290075	1	5.13641e-05	0.295937	7.96747e-06	0.186957	0.000397758	0.265167	0.249354	0.26753	TRUE
Atf5	0.388879	8.01746e-05	0.322171	4.45416e-12	0.451575	4.26436e-08	0.173923	3.18588e-09	0.206056	0.000191552	0.242652	0.274171	0.175783	0.000299727	0.293261	2.16173e-20	0.224328	5.78604e-06	0.439238	0.190298	0.391468	1	0.137865	1	-0.00596295	1	0.165643	1	0.12955	1	1.52418e-12	0.234372	3.30767e-29	0.27572	2.73114e-09	0.237194	0.249095	0.191617	TRUE
Nfe2l1	0.189479	0.0561	0.104007	0.544419	0.214227	0.66553	0.247021	4.55573e-16	0.22568	0.00197658	0.265982	1	0.303233	4.24132e-15	0.24789	6.04166e-16	0.251013	2.15641e-05	0.233241	1	0.0558435	1	0.191213	1	0.356115	0.223928	0.246394	1	0.482342	1	3.00286e-26	0.265818	9.18658e-14	0.175963	0.0136319	0.280955	0.240912	0.11247	TRUE
Rhob	0.25617	1	0.537398	6.14372e-24	0.204273	1	0.238098	5.41168e-07	0.329325	8.7659e-05	0.162721	1	0.0845374	1	0.404361	3.72219e-18	0.315327	1.69197e-05	0.0714809	1	0.308356	1	0.266773	1	0.0888186	1	0.0726279	1	-0.037726	1	0.0013132	0.147821	9.74699e-39	0.330414	0.0152373	0.182273	0.220169	0.228766	TRUE
Gars	0.275226	0.0042494	0.17709	0.071373	0.331708	0.000565037	0.165842	5.21111e-05	0.202964	0.516317	0.269337	0.775612	0.16307	0.0287835	0.143981	0.00233839	0.189708	0.00427857	0.274701	1	0.229267	1	0.369373	1	0.0531535	1	0.131505	1	0.15969	1	4.20809e-05	0.186398	0.0439897	0.176962	0.00326878	0.263963	0.209108	0.179599	TRUE
Krt8	-0.0308744	1	0.365417	1	0.731574	7.965e-06	0.204929	0.0183984	0.471503	3.74511e-06	0.173883	1	0.905277	5.87298e-19	-0.0383089	1	0.0770175	1	-0.55704	1	0.686154	1	0.381952	1	0.319617	1	-0.0847278	1	-0.493001	1	2.19827e-15	0.168382	0.00536427	0.280007	0.00910411	0.174285	0.207558	0.325547	TRUE
S100a11	-0.2946	0.018196	-0.322595	7.06441e-11	-0.239759	0.0406994	-0.145999	0.000343699	-0.00137007	1	-0.187828	0.026455	-0.274303	3.94533e-09	-0.111564	1	-0.410843	9.80082e-24	-0.22672	1	0.0965104	1	-0.225247	1	-0.24504	1	-0.17985	1	-0.278761	1	1.13032e-09	-0.237332	1.04988e-06	-0.103774	6.02373e-21	-0.268487	-0.203198	-0.209406	TRUE
Cox4i1	-0.215429	0.000591599	-0.390222	6.71318e-37	-0.222978	1.40819e-06	-0.146422	1.02787e-13	-0.151773	0.000548297	-0.0818725	1	-0.131896	0.000698561	-0.1582	2.46644e-10	-0.157091	5.5812e-07	-0.278284	1	-0.393439	0.0445646	-0.242485	1	-0.167512	1	-0.299574	1	-0.0337242	1	7.67907e-15	-0.187909	3.164e-44	-0.278642	2.29267e-08	-0.14763	-0.204727	-0.13655	TRUE
Eif3g	-0.201177	0.200034	-0.336306	4.59047e-20	-0.241628	2.05396e-06	-0.113064	0.056796	-0.182608	0.0108731	-0.10654	1	-0.190313	2.86008e-07	-0.237036	2.12123e-18	-0.131729	0.160479	0.0278342	1	-0.352554	1	-0.139587	1	-0.268721	1	-0.393582	0.18986	-0.285959	1	2.44874e-05	-0.149088	6.11106e-34	-0.300417	0.000906167	-0.181089	-0.210198	-0.105261	TRUE
Mrps28	-0.391398	9.89119e-09	-0.228969	4.07205e-06	-0.274965	2.76979e-05	-0.293832	2.96477e-30	-0.0973238	1	-0.160143	0.53739	-0.338316	6.17092e-23	-0.118702	0.324189	-0.234869	1.98957e-13	-0.151823	1	-0.174193	1	-0.179174	1	-0.250403	1	-0.10995	1	-0.169282	1	2.7803e-53	-0.285154	0.00253358	-0.145828	3.62422e-13	-0.203687	-0.211556	-0.170251	TRUE
Uqcrh	-0.248947	0.134271	-0.237825	1.1217e-06	-0.175316	1	-0.129355	0.00010772	-0.0916258	1	-0.10338	1	-0.107128	1	-0.151232	0.00340149	-0.229168	1.29925e-06	-0.459056	0.232526	-0.630002	0.00246085	-0.191708	1	-0.156609	1	-0.173273	1	-0.224246	1	0.00496973	-0.220219	1.91511e-07	-0.256791	0.00250432	-0.184764	-0.220591	-0.30344	TRUE
Myl12a	-0.308563	0.00304861	-0.0493496	1	-0.361052	4.54453e-09	-0.22107	1.25906e-18	-0.124178	1	-0.353853	1.42997e-11	-0.255313	7.33392e-14	-0.200889	5.61854e-12	-0.343554	1.35383e-25	-0.315729	1	-0.226513	1	-0.102656	1	-0.327816	1	-0.201665	1	-0.406741	1	4.40259e-28	-0.285698	1.2374e-07	-0.160519	4.03951e-38	-0.313571	-0.253263	-0.167011	TRUE
Eif5a	-0.169205	1	-0.311671	2.93511e-12	-0.186204	0.998236	-0.277947	2.26883e-20	-0.210796	0.0026104	-0.206177	0.281786	-0.372826	7.60084e-27	-0.354954	2.84609e-32	-0.272627	4.60402e-13	-0.309462	1	-0.28354	1	-0.198125	1	-0.372591	1	-0.392102	1	-0.429572	1	9.20505e-40	-0.300406	1.15374e-39	-0.310613	4.80955e-09	-0.258541	-0.289853	-0.106799	TRUE
Ppia	-0.245121	3.71273e-05	-0.260104	8.83004e-18	-0.377135	5.9924e-22	-0.235688	7.04426e-34	-0.230989	1.0261e-11	-0.336936	4.73267e-25	-0.346172	2.13472e-46	-0.307794	2.44028e-51	-0.433758	2.10534e-67	-0.318952	1	-0.195822	1	-0.356006	0.00163876	-0.361621	0.133833	-0.293747	1	-0.455244	0.0041304	4.47537e-77	-0.301511	1.01345e-71	-0.257691	9.12462e-110	-0.391816	-0.317006	-0.116152	TRUE
AY036118	-0.334472	1	-0.442232	1.06875e-06	-0.448292	0.00400158	-0.139449	6.67085e-06	-0.322322	0.520108	-0.307374	0.00515013	-0.243471	1	-0.36539	1.01857e-10	-0.276734	2.85616e-10	-0.391932	1	-0.747828	1	-0.670347	1	0.244355	1	-0.228454	1	-0.262597	1	0.00804913	-0.172994	5.15655e-12	-0.421245	3.20568e-10	-0.393069	-0.329103	-0.315298	TRUE
S100a10	-0.351142	6.57517e-06	-0.439889	6.07269e-27	-0.323356	3.19129e-07	-0.309943	3.56808e-36	-0.220394	0.000156224	-0.33663	3.60024e-14	-0.409271	1.94462e-33	-0.277276	9.45175e-21	-0.39709	1.98512e-30	-0.241862	1	-0.256287	1	-0.379709	0.477191	-0.236229	1	-0.389289	1	-0.385676	1	1.58328e-66	-0.309689	6.82375e-44	-0.316627	8.22734e-44	-0.364492	-0.33027	-0.142555	TRUE
Rbm3	-0.397386	5.09795e-08	-0.398601	1.47239e-19	-0.213907	0.524948	-0.334469	1.44687e-41	-0.531288	3.38233e-34	-0.375956	3.43227e-16	-0.380655	7.45422e-37	-0.585818	5.36371e-102	-0.446169	1.57192e-47	-0.117466	1	-0.13403	1	-0.274689	1	-0.296481	1	-0.658989	4.41011e-05	-0.331862	1	3.31407e-77	-0.305291	8.67845e-150	-0.461745	5.22126e-56	-0.328516	-0.365184	-0.276731	TRUE
Fn1	0.300579	1	0.143873	1	0.272939	1	0.452291	3.1582e-15	0.558364	0.00314754	0.250624	1	0.552329	2.29272e-08	0.472264	8.56395e-13	-0.0712752	1	0.658383	1	0.500769	1	0.192718	1	0.941672	0.00388883	0.734354	1	-0.0746943	1	1.28754e-19	0.581051	1.60823e-10	0.481925	1	0.114062	0.392346	0.279969	FALSE
Btg2	0.688816	4.76879e-08	0.170846	1	0.428044	0.0259345	0.735498	3.87827e-38	0.591254	4.52197e-07	0.2132	1	1.01303	3.92087e-36	0.432721	4.47393e-15	0.145964	1	0.357414	1	0.266414	1	-0.126368	1	0.508562	1	0.425465	1	-0.156514	1	3.58041e-73	0.660663	4.7343e-16	0.37734	0.696433	0.100865	0.379623	0.578749	FALSE
Dusp1	0.43384	0.00623829	0.63318	5.136e-20	0.306886	0.019112	0.513207	2.04141e-26	0.253702	0.456507	0.149892	1	0.56385	6.48985e-15	0.231787	0.0786455	0.175088	1	0.846723	0.51743	0.237193	1	0.291327	1	0.618464	0.883326	0.080669	1	-0.0892217	1	1.49354e-36	0.595217	4.34798e-16	0.287306	0.637151	0.166794	0.349773	0.693495	FALSE
Klf6	0.318984	1	0.551436	3.56489e-16	0.477322	0.00216394	0.208645	0.0317932	0.532938	1.44971e-09	0.672764	8.53715e-09	0.158954	1	0.374902	6.02486e-09	0.36654	8.26819e-06	0.452376	1	0.153451	1	0.123775	1	0.2438	1	0.416246	1	0.14474	1	0.735131	0.276552	4.29867e-27	0.405795	1.25312e-11	0.357028	0.346458	0.387004	FALSE
Scd2	0.503612	2.46593e-09	0.445983	1.69314e-16	0.362845	0.000132889	0.43523	1.716e-34	0.330595	1.52703e-06	0.226168	1	0.302086	1.65132e-11	0.289986	5.07438e-12	0.216617	1	0.437793	1	0.156295	1	0.140324	1	0.459031	0.662673	0.310429	1	0.297338	1	4.5349e-47	0.427551	1.8952e-27	0.306658	0.0575121	0.248658	0.327622	0.217277	FALSE
Nars	0.371982	6.12004e-05	0.295377	5.64799e-10	0.512271	1.29745e-08	0.193279	2.78728e-09	0.234088	0.105309	0.367827	1.35143e-06	0.197257	7.26234e-05	0.297836	2.69604e-16	0.399619	3.79377e-16	0.478394	1	0.0571021	1	0.50632	0.0345858	0.207832	1	0.294016	1	0.437803	1	1.31727e-12	0.289749	8.90447e-21	0.235684	2.51492e-25	0.444768	0.3234	-0.0116619	FALSE
Sox4	0.280342	1	0.687671	2.14799e-29	0.136982	1	0.0846002	1	0.305599	0.0608974	0.237371	1	0.21432	0.370155	0.340079	7.05911e-13	0.334412	5.69471e-07	0.521909	1	0.59574	1	0.132924	1	0.401615	1	0.583171	0.165608	-0.0744653	1	0.996434	0.300557	6.27071e-37	0.502452	0.00136396	0.153445	0.318818	0.240748	FALSE
Stmn2	-0.0931435	1	0.0746306	1	-0.00661334	1	0.28082	0.0938291	0.49122	0.108077	0.219957	1	-0.0410487	1	0.772543	7.71461e-07	0.815507	7.72546e-10	0.215748	1	-0.223119	1	0.231735	1	0.762633	1	0.858166	1	0.283111	1	0.908312	0.225002	0.00031793	0.394688	7.61427e-06	0.308739	0.309476	0.408853	FALSE
Ankrd37	0.261886	1	0.0261409	1	0.393155	1	0.122201	1	0.296437	1	0.324838	1	0.051585	1	0.184536	1	0.27101	1	0.315099	1	-0.193487	1	0.616085	1	0.499206	1	0.280363	1	0.941167	1	1	0.249995	1	0.118798	1	0.509251	0.292681	0.0771581	FALSE
Klf2	0.126661	1	0.409798	0.0017653	0.355956	1	0.147049	1	0.340429	1	0.153591	1	0.145236	1	0.310761	0.0483709	0.36979	0.0124426	0.282954	1	0.531996	1	0.42627	1	0.0141565	1	0.30517	1	0.373817	1	1	0.143211	0.0437389	0.379631	0.553748	0.335885	0.286242	0.480341	FALSE
Ero1l	0.261216	1	0.118891	1	0.569864	0.00343202	0.191394	1	0.273246	1	0.546344	0.00169727	0.14596	1	0.0201984	1	0.219931	1	0.371631	1	-0.127502	1	0.601147	1	0.263524	1	0.13528	1	0.643923	1	1	0.246745	1	0.0840225	0.0073222	0.516242	0.282336	0.270937	FALSE
Fosb	0.290676	1	0.437851	9.66271e-11	0.442649	0.000233009	0.0987669	0.399392	0.137483	1	0.253553	1	0.279063	0.211799	0.409979	3.26104e-12	0.421678	2.64171e-07	0.608536	1	0.384689	1	0.158695	1	0.124805	1	0.320757	1	-0.266774	1	0.895159	0.280369	8.56587e-17	0.338152	9.35531e-07	0.20196	0.273494	0.387485	FALSE
Ccnd2	0.289711	1	0.185327	0.165861	0.248847	1	0.293381	1.56286e-21	0.311507	3.20727e-08	0.191185	1	0.426374	3.10117e-27	0.228447	6.00886e-06	0.124566	1	0.0619852	1	0.307454	1	0.290479	1	0.494867	1	0.34275	1	0.301075	1	2.95234e-41	0.313264	1.41813e-09	0.275097	1	0.23123	0.273197	0.288379	FALSE
Igfbp6	0.325766	0.0178521	0.113488	1	0.314374	1	0.451368	1.10926e-26	0.252897	0.552652	0.1381	1	0.385789	3.5803e-16	0.0760301	1	0.0138469	1	0.517089	1	0.529469	1	0.702924	1	0.471761	1	-0.174253	1	-0.100428	1	2.99813e-37	0.430355	0.999626	0.159526	1	0.213763	0.267881	0.541705	FALSE
Hk2	0.16962	1	0.130957	1	0.276708	1	0.299135	8.61285e-15	0.237527	0.00903805	0.461356	1.95985e-07	0.363915	8.86271e-15	0.185461	0.380725	0.443936	6.80872e-17	0.0258503	1	0.19087	1	0.202656	1	0.0599236	1	0.22785	1	0.639873	1	5.94977e-23	0.183689	0.331354	0.194533	4.62339e-18	0.404906	0.261043	0.0916159	FALSE
Ddit4	0.256547	1	0.0343976	1	0.120003	1	0.311484	1.37017e-17	0.310487	9.2141e-05	0.25707	1	0.327378	2.97398e-12	0.286307	3.77224e-13	0.19375	0.869832	0.0390683	1	0.465327	1	0.147932	1	0.529758	0.279516	0.189433	1	0.383922	1	9.95003e-24	0.292847	3.32917e-12	0.25719	1	0.220535	0.256858	0.21152	FALSE
Siae	0.272052	0.752124	0.467257	3.49284e-24	0.208125	1	0.208094	1.15955e-09	0.222591	0.0170857	0.106909	1	0.208448	4.18093e-05	0.296125	2.19111e-16	0.249879	0.00106463	0.429376	1	0.318969	1	0.127614	1	0.372547	1	0.342272	1	0.0193938	1	1.59137e-09	0.298103	4.46651e-35	0.329443	0.187594	0.142384	0.256643	0.239138	FALSE
Vegfa	0.123817	1	0.309832	4.06674e-05	0.105959	1	0.14798	1	0.245171	1	0.121232	1	0.213205	0.0252928	0.318724	1.27648e-08	0.272111	0.00504996	0.153994	1	0.236929	1	0.552821	1	0.296974	1	0.348784	1	0.348653	1	0.69161	0.187194	1.60287e-08	0.291888	0.391429	0.280155	0.253079	0.165967	FALSE
Soat1	0.166322	1	0.16373	0.286003	0.436539	1.32834e-09	0.157711	0.0205243	0.17027	1	0.366007	0.00113126	0.152438	0.0470528	0.153734	0.00270024	0.301277	5.19544e-05	0.0486925	1	0.402106	1	0.330551	1	0.0618921	1	0.0995481	1	0.633389	1	0.17829	0.117411	0.158365	0.197878	6.87597e-12	0.413553	0.242947	-0.0521707	FALSE
Col6a3	-0.0838473	1	-0.408264	3.28976e-05	-0.0346483	1	0.126876	1	0.398205	0.00083898	0.116961	1	0.114564	1	0.34385	1.76391e-15	-0.018297	1	0.761874	1	1.12988	0.368141	0.462494	1	0.425474	1	0.217546	1	0.000234867	1	1	0.268988	6.07454e-18	0.336243	1	0.105349	0.23686	0.277413	FALSE
Ifi202b	0.0223874	1	0.0822331	1	0.333999	0.00226394	0.00769691	1	0.124391	1	0.212946	1	0.126842	1	0.272488	1.52357e-06	0.323855	0.000113476	0.144866	1	0.0446988	1	0.445165	1	0.312534	1	0.46673	1	0.591272	1	1	0.122865	0.00281221	0.198108	0.000750919	0.381447	0.23414	0.241032	FALSE
Rrbp1	0.252838	0.0925994	0.28297	1.05101e-10	0.182469	1	0.123973	1	0.0385565	1	0.139153	1	0.139812	1	0.179386	6.89296e-06	0.239148	1.75192e-07	0.506924	1	0.203185	1	0.409332	0.867608	0.354652	1	0.0812346	1	0.375658	1	0.906688	0.27564	5.01644e-11	0.157066	0.000504026	0.269152	0.233953	0.0476929	FALSE
Irf1	0.163517	1	-0.00808301	1	0.350381	1	0.239354	3.9141e-07	0.169224	1	0.673103	1.11715e-13	0.264309	0.00399238	0.0672325	1	0.470253	1.02779e-05	-0.00761153	1	0.275247	1	0.260845	1	0.0331931	1	-0.0191504	1	0.552638	1	1.35325e-05	0.138552	1	0.0968942	1.53819e-13	0.461444	0.232297	0.279969	FALSE
Ddx17	0.149821	1	0.0946086	0.0139548	0.227959	0.723271	0.249984	1.91495e-17	0.253988	2.39002e-05	0.266125	0.0772493	0.179978	1.27138e-06	0.157504	2.53958e-06	0.176783	1	0.325614	1	0.273973	1	0.222258	1	0.315721	1	0.108811	1	0.471316	1	8.06411e-18	0.244224	2.4454e-08	0.177777	0.834253	0.272888	0.23163	0.136285	FALSE
Sars	0.219805	0.609168	0.231801	7.72434e-06	0.435292	2.9344e-13	0.179684	8.20798e-12	0.187027	0.00741206	0.279454	8.59305e-07	0.162374	3.18834e-06	0.214861	2.496e-14	0.279807	2.4114e-15	0.209947	1	0.00135707	1	0.337259	1	0.246452	1	0.156196	1	0.270285	1	1.65278e-12	0.203652	3.44062e-16	0.158248	9.14085e-28	0.32042	0.22744	0.00869949	FALSE
Gm20186	0.202083	0.0120374	0.186129	2.67252e-08	0.203537	0.684356	0.275478	9.18783e-19	0.125672	1	0.0886106	1	0.289688	5.84259e-13	0.199731	4.28099e-08	0.224092	0.00187746	0.421078	0.134497	0.192778	1	0.267771	1	0.334774	1	0.102401	1	0.238833	1	1.2826e-27	0.30462	7.52706e-11	0.161342	0.20663	0.204569	0.22351	0.226193	FALSE
Pnrc1	0.333366	0.0163422	0.338471	5.56224e-10	0.433091	0.000376011	0.0103626	1	0.0585653	1	0.172271	1	0.104232	1	0.186085	0.00720532	0.2481	0.0130514	0.172378	1	-0.044007	1	0.294169	1	0.122824	1	0.370935	1	0.464783	1	0.606576	0.148633	9.27624e-08	0.18201	0.00649259	0.322483	0.217709	0.0528437	FALSE
Cdkn1b	0.263897	2.47101e-05	0.123699	0.019465	0.142123	1	0.176832	7.9109e-08	0.127655	1	0.104729	1	0.224796	1.42524e-12	0.181094	4.96101e-08	0.177105	1	0.237687	1	0.175012	1	0.154634	1	0.355671	1	0.368533	1	0.412049	1	1.08289e-18	0.251777	9.13955e-06	0.195199	1	0.198128	0.215034	0.129431	FALSE
Rbpj	0.322716	0.00252385	0.16229	0.318947	0.305067	0.00684469	0.24424	5.26599e-14	0.104858	1	0.317801	0.0171893	0.367091	1.33127e-10	0.122917	0.0457294	0.237285	0.000285513	-0.324869	1	-0.127414	1	0.228816	1	0.39421	1	0.380306	1	0.43084	1	9.76118e-21	0.200678	0.584436	0.128592	0.000156876	0.303962	0.211077	-0.0181743	FALSE
Mast4	0.130425	1	0.168974	0.000625753	0.246756	0.774612	0.173307	8.19523e-05	0.175968	0.074889	0.207675	1	0.161992	0.450465	0.237818	4.58195e-11	0.246432	0.0193578	0.104226	1	0.335828	1	0.0995207	1	0.373523	1	0.256679	1	0.222275	1	0.0255739	0.188694	1.31505e-10	0.235053	0.589817	0.204532	0.209426	0.0419483	FALSE
Pmepa1	-0.0180164	1	0.333134	0.0111375	0.0816271	1	-0.092104	1	0.238277	1	0.0988724	1	-0.0161611	1	0.357682	3.01424e-16	0.189032	1	0.303178	1	0.309948	1	0.110143	1	0.291839	1	0.512336	1	0.441277	1	1	0.0937472	4.05899e-13	0.350275	1	0.18419	0.209404	-0.0918805	FALSE
Tcf4	0.279441	0.0558512	0.211201	0.00828484	0.149597	1	0.234718	8.03893e-16	0.196506	0.358322	0.0663332	1	0.376452	4.24256e-14	0.290225	7.36109e-12	0.152605	1	0.180523	1	0.391969	1	0.0735917	1	0.488805	0.596066	0.169782	1	-0.126843	1	1.13409e-24	0.311988	1.01615e-09	0.251937	1	0.0630568	0.208994	0.211075	FALSE
Flna	0.151857	1	0.226036	0.00380141	0.212687	1	0.0990661	1	0.112251	1	0.0682087	1	0.159663	0.00113077	0.124919	0.00551363	0.16317	1	0.546406	1	0.490164	0.131069	0.286929	1	0.050357	1	0.0211299	1	0.375931	1	0.193538	0.20147	0.00430183	0.1949	1	0.221385	0.205918	0.0993972	FALSE
Kdm5b	0.23649	1	0.135401	1	0.241533	1	0.142169	0.0123517	0.226706	0.274016	0.15811	1	0.146085	9.95793e-07	0.191506	5.60482e-08	0.130504	1	0.0548756	1	0.227336	1	0.189308	1	0.339387	1	0.318014	1	0.340733	1	7.10624e-05	0.183801	8.4736e-05	0.219793	1	0.212038	0.205211	0.188605	FALSE
Myh9	0.281754	0.326838	0.201173	0.00184115	0.205679	1	0.260605	3.47248e-10	0.218061	1	0.119883	1	0.0793564	1	0.0904105	0.967286	0.0531182	1	0.481985	1	0.295877	1	0.0266366	1	0.105356	1	0.142147	1	0.468235	1	1.55992e-06	0.241811	0.243233	0.189534	1	0.17471	0.202018	0.229349	FALSE
Arl4c	0.0271558	1	0.0731899	1	0.0329525	1	-0.0231543	1	0.055162	1	0.0566609	1	0.222527	0.0313299	0.205121	0.000220957	0.155772	1	0.457884	1	0.501195	1	0.0576878	1	0.482481	1	0.24857	1	0.46028	1	0.732378	0.233379	0.0780936	0.216648	1	0.152671	0.200899	0.0531892	FALSE
Btg1	0.0606047	1	0.167612	0.961455	0.16379	1	-0.0361157	1	0.0628717	1	0.165384	1	0.109301	1	0.19723	4.43901e-07	0.198887	0.00666039	0.126593	1	0.194447	1	0.390008	1	0.311138	1	0.403615	1	0.495272	1	1	0.114304	0.00109996	0.205155	0.438464	0.282668	0.200709	-0.0349472	FALSE
Tsc22d1	0.268921	1	0.174685	0.00979515	0.0310109	1	0.194098	5.01912e-06	0.179672	0.264541	0.0863121	1	0.208174	0.00140318	0.172468	0.00135919	0.117334	1	0.455667	1	0.231155	1	0.21114	1	0.405273	1	0.232828	1	0.0374017	1	4.55774e-05	0.306427	0.00513542	0.198161	1	0.0966398	0.200409	0.284218	FALSE
Glg1	0.145787	1	0.215007	0.00013219	0.0925764	1	0.223631	1.69702e-17	0.0817041	1	0.138323	1	0.305772	3.32984e-17	0.139445	0.0965952	0.08169	1	0.387254	1	0.109499	1	0.237118	1	0.406906	0.0175058	0.202932	1	0.214096	1	1.82923e-29	0.29387	0.0125909	0.149717	1	0.152761	0.198783	0.174303	FALSE
Eprs	0.347326	0.000100381	0.150556	1	0.338976	0.000182562	0.243302	4.03025e-17	0.116348	1	0.242153	0.381501	0.196124	5.75404e-05	0.0667064	1	0.142931	1	0.38276	1	0.133202	1	0.401836	1	0.202371	1	0.0498827	1	-0.0453883	1	1.07855e-19	0.274377	1	0.103339	0.0384698	0.216101	0.197939	0.300991	FALSE
Chd4	0.282817	0.0120511	0.218623	4.18106e-06	0.256041	0.00572108	0.246091	1.45127e-16	0.157213	1	0.10933	1	0.264195	1.66358e-12	0.134412	0.0788944	0.18831	0.003659	0.28162	1	0.335769	1	0.179805	1	0.29959	1	0.0384311	1	-0.0346595	1	2.75296e-24	0.274862	0.000906669	0.176889	0.0175784	0.139765	0.197172	0.145354	FALSE
Klf4	0.124718	1	0.231397	0.276482	0.232047	1	0.165706	1	0.0585275	1	0.127421	1	0.439282	2.26365e-05	0.202363	1	0.123663	1	0.396086	1	0.0267027	1	0.384422	1	0.238999	1	0.126079	1	0.0432142	1	0.0185207	0.272958	0.989797	0.129014	1	0.182153	0.194708	0.215583	FALSE
Itgb1	0.112493	1	0.167846	0.331078	0.138719	1	0.198282	5.18287e-10	0.109374	1	0.171798	1	0.358477	2.42261e-16	0.14977	0.00389784	0.149559	1	0.300206	1	0.103769	1	0.134497	1	0.280198	1	0.164289	1	0.376499	1	6.07018e-20	0.249931	0.207091	0.13901	1	0.194214	0.194385	-0.0094468	FALSE
mt-Co1	0.168905	1	0.213008	0.00730271	0.180297	1	0.258457	1.08735e-17	0.161488	0.194901	0.235593	0.00425214	0.243652	7.90544e-11	0.193822	1.09025e-07	0.250284	1.0238e-06	0.33393	1	-0.0327646	1	-0.0771004	1	0.287679	1	0.417375	1	0.0724685	1	5.76688e-22	0.258525	2.02395e-06	0.190586	3.09922e-05	0.132309	0.193806	0.20055	FALSE
Pdgfa	0.0685696	1	-0.00543664	1	0.0223375	1	0.202342	0.282502	0.265669	0.159483	0.0455065	1	0.473152	2.28552e-05	0.448601	3.89973e-14	-0.00929806	1	0.11546	1	0.351847	1	-0.196359	1	0.404928	1	0.642765	1	0.0659691	1	0.0078681	0.25289	3.36519e-10	0.340689	1	-0.0143688	0.19307	0.3271	FALSE
Psph	0.400815	1.85791e-06	0.267009	5.45752e-05	0.481854	8.13155e-09	0.0990466	1	0.124571	1	0.218037	1	0.152994	1	0.113722	1	0.243831	0.107156	0.0722229	1	0.0369524	1	0.226707	1	0.126006	1	-0.00389899	1	0.325666	1	0.00324711	0.170217	0.0329333	0.107671	8.40273e-06	0.299219	0.192369	0.152085	FALSE
Uba52	0.138813	1	-0.110409	1	0.328045	2.1324e-10	0.271094	4.99268e-32	-0.0502858	1	0.353632	1.91748e-15	0.290775	1.23241e-21	0.0307574	1	0.422861	1.42483e-33	0.00318414	1	-0.117971	1	0.449618	0.000254644	0.227892	1	0.125085	1	0.519113	1	5.53802e-46	0.186352	1	-0.0245646	2.44834e-54	0.414654	0.192147	0.00847045	FALSE
Phf10	0.3628	7.58292e-08	0.378827	9.68479e-20	0.352229	2.49533e-05	0.142681	0.000530919	0.103925	1	0.0877865	1	0.219819	2.55407e-08	0.153686	0.000765882	0.170778	1	0.207833	1	0.180792	1	0.419242	0.0352621	0.0125755	1	0.132666	1	-0.0514034	1	1.3919e-13	0.189142	2.25715e-17	0.189979	0.00188205	0.195726	0.191616	0.183059	FALSE
Serpinh1	0.35021	6.97057e-05	0.369391	3.37342e-16	0.163076	1	0.089743	1	0.269863	0.000798435	0.0131861	1	0.0397588	1	0.279049	1.03318e-16	0.0324553	1	0.211637	1	0.357398	1	0.133275	1	0.381322	0.294591	0.171477	1	0.00410569	1	0.0173537	0.214534	4.89005e-29	0.289436	1	0.0692197	0.191063	0.288253	FALSE
Cdkn1a	0.219848	1	0.128974	1	0.356945	0.0582007	-0.0367673	1	0.0801911	1	0.0680034	1	0.260232	0.148603	0.147849	1	0.289199	1	0.324688	1	0.508726	1	0.613073	1	-0.0692083	1	-0.0993247	1	0.0708454	1	0.955391	0.139758	1	0.153283	0.840782	0.279613	0.190885	0.20466	FALSE
Gm10076	0.198073	0.255318	-0.00292529	1	0.325713	1.90976e-09	0.226408	1.66902e-20	-0.0609167	1	0.395592	1.86064e-17	0.15797	0.000338298	-0.120429	0.0743635	0.335722	3.07493e-25	0.134089	1	-0.141598	1	0.390434	0.055701	0.311982	1	0.138673	1	0.523406	1	5.8751e-19	0.205704	0.877594	-0.0374392	5.07524e-45	0.394174	0.18748	-0.319885	FALSE
Dync1i2	0.0922689	1	0.254466	5.69118e-11	0.102982	1	0.161812	1.09415e-10	0.207397	0.00440603	0.181119	1	0.134043	0.00756164	0.171778	2.10364e-09	0.209346	0.000165591	0.314947	1	0.309312	1	0.168819	1	0.219596	1	0.0687332	1	0.206427	1	2.39643e-08	0.184533	1.37641e-16	0.202337	0.0657307	0.173738	0.18687	0.126659	FALSE
Nedd4	0.252705	0.0259181	0.249536	5.63034e-10	0.128014	1	0.210637	2.92212e-14	0.0989365	1	0.053928	1	0.272376	3.68408e-14	0.128571	0.0302093	0.0855439	1	0.264619	1	0.522217	0.0760528	0.113857	1	0.186122	1	0.0787564	1	0.148971	1	2.31095e-23	0.237292	3.52062e-08	0.215603	1	0.106063	0.186319	0.162584	FALSE
Sat1	-0.154059	1	0.165942	1	0.1751	1	-0.0430973	1	0.186422	1	0.224996	1	0.120623	1	0.304679	6.44019e-06	0.175028	1	0.206477	1	0.564212	0.858525	0.102072	1	0.0578951	1	0.448439	1	0.253124	1	1	0.0375678	0.00705964	0.333939	1	0.186064	0.185857	0.0786198	FALSE
Map4k4	0.230036	0.527637	0.266159	1.34605e-08	0.211728	1	0.0899743	1	0.142843	1	0.149928	1	0.178852	0.020381	0.174982	0.00212377	0.0807166	1	0.184418	1	0.271743	1	0.056602	1	0.199812	1	0.318973	1	0.224101	1	0.525947	0.176618	4.91151e-07	0.23494	1	0.144615	0.185391	0.0715589	FALSE
Fam129a	0.207354	4.28044e-06	0.129778	3.72954e-05	0.27577	5.85226e-07	0.0968273	6.50354e-11	0.0635013	1	0.0524858	1	0.194344	2.72646e-17	0.127433	3.50179e-08	0.122148	1	0.227314	1	0.431952	0.00142428	0.343015	0.810837	0.248126	1	0.139087	1	0.117184	1	9.99495e-27	0.194793	1.15811e-10	0.17835	0.00119065	0.182121	0.185088	0.16631	FALSE
Zfp36	0.307767	0.00471494	0.323228	2.3538e-09	0.234946	1	0.10433	1	0.262357	1	-0.0603442	1	0.191697	0.00536351	0.332113	6.93527e-10	0.0433382	1	0.345353	1	0.558651	1	-0.0990376	1	0.116443	1	0.256372	1	-0.169482	1	0.0199368	0.213118	2.11516e-13	0.346544	1	-0.010116	0.183182	0.3608	FALSE
Nrp2	0.239564	1	0.0269513	1	0.273833	1	0.247071	2.58277e-12	0.0299748	1	0.0784482	1	0.353798	8.56102e-13	0.149915	1	0.133438	1	0.252099	1	0.343935	1	0.131491	1	0.359029	1	-0.031443	1	0.136078	1	8.73886e-19	0.290312	1	0.103867	1	0.150658	0.181612	0.262406	FALSE
Mbnl1	0.224199	0.177353	0.0497135	1	0.205507	0.388989	0.204845	5.85984e-11	0.0939808	1	0.150159	1	0.308483	3.2025e-14	0.096358	0.131331	0.104124	1	0.436669	0.617829	0.211632	1	0.165155	1	0.260489	1	0.0726867	1	0.13462	1	9.6093e-20	0.286937	0.944596	0.104874	0.997126	0.151913	0.181241	0.0361247	FALSE
Add1	0.142057	1	0.1072	1	0.159046	1	0.171404	8.55725e-13	0.159254	0.0403552	0.128965	1	0.296678	9.31551e-20	0.1596	2.35805e-06	0.133079	1	0.155145	1	0.421605	0.172208	0.138499	1	0.235784	1	0.183206	1	0.125944	1	9.24152e-26	0.200213	8.91963e-05	0.206173	1	0.137107	0.181164	0.12318	FALSE
Bhlhe40	0.203193	1	0.086319	1	0.089508	1	0.171194	4.4923e-05	0.258259	0.0890116	-0.00989826	1	0.347446	4.3265e-13	0.268162	7.05769e-07	0.0647123	1	0.0375047	1	0.37838	1	0.0428492	1	0.323876	1	0.249985	1	0.203793	1	1.97516e-12	0.216643	0.000255435	0.248221	1	0.0781928	0.181019	0.269378	FALSE
Sptbn1	0.281939	0.0299463	0.114197	1	0.108083	1	0.335076	2.10465e-25	0.216333	1	0.0901218	1	0.357452	3.59983e-15	0.215499	6.3551e-07	-0.0325897	1	0.306208	1	0.342652	1	-0.113153	1	0.355423	1	0.156099	1	-0.030372	1	7.57197e-35	0.32722	0.00147976	0.208956	1	0.00441799	0.180198	0.253067	FALSE
Akap9	0.257715	0.0578184	0.195657	0.000108998	0.208135	0.107808	0.131601	0.00455296	0.0991944	1	0.153112	1	0.184196	2.29082e-05	0.120561	0.214257	0.129398	1	0.23317	1	0.331163	1	0.0711728	1	0.311066	1	0.0567318	1	0.206334	1	4.02559e-05	0.22355	0.0189094	0.160661	0.924507	0.15363	0.17928	0.226841	FALSE
Ogt	0.0414419	1	0.161303	0.00420122	0.178418	1	0.073057	1	0.182982	0.00108434	0.0816009	1	0.246687	3.4654e-13	0.332538	4.77535e-23	0.24114	0.0617548	0.16796	1	0.163121	1	0.0833674	1	0.30384	1	0.405355	1	0.02499	1	1.13009e-08	0.166597	1.59022e-22	0.249059	0.850069	0.121903	0.179187	0.196846	FALSE
Rbms1	0.11363	1	0.257678	1.60784e-07	0.0849449	1	0.0850626	1	0.179568	1	0.168132	1	0.127344	0.072455	0.121222	0.0358648	0.175836	0.194214	0.235589	1	0.239173	1	0.115305	1	0.333624	1	0.0193598	1	0.413099	1	0.873894	0.17905	3.88378e-05	0.1634	0.974116	0.191464	0.177971	0.189957	FALSE
Uqcrq	0.180693	0.860513	0.137782	0.152616	0.42399	1.2491e-14	0.143649	7.12972e-06	0.13624	1	0.351125	8.9796e-11	0.122098	1	0.159964	3.69406e-07	0.338356	3.53937e-22	0.141859	1	0.0767486	1	0.360442	0.220121	-0.0894948	1	-0.0942564	1	0.252025	1	0.00759261	0.0997608	0.000234868	0.0832956	4.78484e-40	0.345187	0.176081	-0.103035	FALSE
Calu	0.186861	1	0.188777	0.00853352	0.0955273	1	0.0792938	1	0.139885	1	0.127365	1	0.172658	0.000650179	0.149337	0.0357507	0.0503111	1	0.246012	1	0.192904	1	0.150853	1	0.384756	1	0.295659	1	0.178903	1	0.144308	0.213916	0.0943244	0.193312	1	0.120592	0.17594	0.0828716	FALSE
Phgdh	0.41252	5.80234e-07	0.177811	0.134518	0.40391	3.14543e-05	0.240803	4.31239e-08	0.156975	1	0.148221	1	0.151252	1	0.0346149	1	0.14308	1	0.450627	1	0.096621	1	0.269927	1	0.118716	1	-0.0631534	1	-0.112928	1	1.14429e-09	0.274784	0.946799	0.0805738	0.0230271	0.170442	0.175267	0.257987	FALSE
Ktn1	0.192971	1	0.174151	0.00784157	0.11645	1	0.0770194	1	0.0455205	1	0.141314	1	0.131775	0.0827785	0.0260628	1	0.0884014	1	0.218425	1	0.0971729	1	0.343369	1	0.396582	1	0.142469	1	0.417825	1	0.892299	0.203354	0.4675	0.0970751	1	0.221472	0.173967	0.0558946	FALSE
Lrp1	0.119696	1	0.155382	0.0328146	0.0536952	1	0.161574	1.29249e-06	0.15657	1	-0.00691917	1	0.213091	6.5083e-06	0.138811	0.000718568	0.115317	1	0.264931	1	0.299992	1	0.0801678	1	0.396423	1	0.345713	1	0.112881	1	1.74439e-07	0.231143	0.019031	0.219294	1	0.0710284	0.173822	0.0930287	FALSE
Has2	0.0479124	1	0.217858	0.171019	0.265626	1	0.0346604	1	0.0157528	1	0.142554	1	0.196367	1	0.151494	1	0.258949	1	0.252502	1	0.330995	1	0.252614	1	0.353887	1	0.0467481	1	0.0339968	1	1	0.177066	0.966002	0.152569	1	0.190748	0.173461	0.113127	FALSE
Rpl35	0.0718446	1	0.366073	3.23148e-23	0.214331	3.10545e-06	0.163593	2.79762e-16	0.0957902	1	0.324289	2.1618e-18	0.0232908	1	0.0469404	1	0.310484	2.07718e-35	0.0905415	1	-0.0915955	1	0.327327	0.128995	0.126866	1	0.141913	1	0.38097	1	2.15057e-11	0.0952273	1.04771e-17	0.111824	2.58499e-52	0.31148	0.172844	-0.218794	FALSE
Dync1h1	0.160597	1	0.101002	0.51485	0.157677	1	0.178566	7.45705e-08	0.118859	1	0.207578	1	0.19551	5.28456e-06	0.0948349	1	0.130474	1	0.120487	1	0.106293	1	0.123662	1	0.266804	1	0.201159	1	0.405221	1	1.26306e-08	0.184393	0.999379	0.12443	1	0.204923	0.171248	0.145727	FALSE
App	0.211352	1	0.172018	0.00315286	0.137871	1	0.155412	0.000220767	0.194304	1	0.0590153	1	0.152576	0.00348144	0.148282	0.00102932	0.0347305	1	0.401267	0.966336	0.273138	1	0.0462224	1	0.317366	1	0.16853	1	0.0837049	1	0.00166082	0.247595	0.00484514	0.191254	1	0.0723088	0.170386	0.168683	FALSE
Tubb5	0.0586606	1	0.314134	9.9958e-14	0.00870487	1	0.0995143	0.0296235	0.122459	1	0.0557892	1	0.133652	0.000383855	0.183372	3.62874e-12	0.093643	1	0.0741798	1	0.385208	1	0.280611	1	0.214648	1	0.175797	1	0.353539	1	0.0116326	0.116131	1.62956e-19	0.236194	1	0.158458	0.170261	0.121471	FALSE
Map4	0.0986463	1	0.141899	0.00284285	0.0792952	1	0.138343	5.46569e-05	0.083537	1	0.0653762	1	0.154994	0.00019778	0.175262	2.85463e-08	0.206845	1	0.516456	1	0.345452	1	0.0952233	1	0.196437	1	0.122502	1	0.133445	1	6.41359e-05	0.220975	1.17899e-06	0.17373	1	0.116037	0.170248	0.120981	FALSE
Tln1	0.276984	0.0287747	0.101327	1	0.255213	0.320775	0.226284	4.02123e-16	0.121757	1	0.168445	1	0.324902	4.17766e-19	0.0821581	1	0.133256	1	0.441505	1	-0.0992112	1	0.177772	1	0.110996	1	0.0839258	1	0.11739	1	9.25652e-30	0.276134	1	0.0579914	0.993776	0.170415	0.16818	0.222537	FALSE
Cep170	0.241323	0.065043	0.054188	1	0.0803326	1	0.0609813	1	0.0971475	1	0.196103	1	0.0915224	1	0.0973115	1	0.0986602	1	0.177834	1	0.119908	1	0.0600367	1	0.340017	1	0.279078	1	0.527226	1	0.858003	0.182335	1	0.129527	1	0.192472	0.168111	0.071385	FALSE
Mbnl2	0.0759225	1	0.0988154	1	0.212482	0.0732209	-0.00194624	1	0.109267	1	0.124414	1	0.0947458	1	0.0565407	1	0.168338	1	0.221912	1	0.169624	1	0.245187	1	0.215742	1	0.240289	1	0.462553	1	1	0.121275	1	0.134907	0.875397	0.242595	0.166259	0.109544	FALSE
Krtcap2	0.131974	1	0.0355114	1	0.267815	0.00047598	0.117376	0.0172323	0.17828	1	0.263389	0.00160856	0.107371	1	0.150935	2.90835e-05	0.238111	3.24532e-09	0.187251	1	-0.0241699	1	0.257395	1	0.168812	1	0.0767913	1	0.328926	1	0.616928	0.142557	0.0218689	0.0834695	1.49646e-10	0.271127	0.165718	0.0159976	FALSE
Lars	0.362051	1.36989e-06	0.183016	0.00796767	0.318871	0.00152065	0.110366	0.142571	0.0976291	1	0.0998229	1	0.150981	0.190787	0.144164	0.323722	0.152973	1	0.0167276	1	0.118886	1	0.257488	1	0.196755	1	0.0916392	1	0.163718	1	0.000170124	0.167376	0.290415	0.127067	0.224948	0.198574	0.164339	0.176772	FALSE
Prelid2	0.015905	1	0.011615	1	0.151239	1	0.0850087	1	0.064375	1	0.251253	1	0.135578	1	0.178121	0.0431882	0.170303	1	0.025186	1	0.18891	1	0.30698	1	0.198173	1	0.125046	1	0.532686	1	1	0.0919701	0.790832	0.113613	1	0.282492	0.162692	0.117026	FALSE
Tsc22d4	0.223412	0.0322969	0.116372	0.902853	0.240887	0.0251225	0.162395	1.4336e-08	0.11268	1	0.271409	0.000659683	0.184421	0.00110806	0.120548	0.00507169	0.30225	5.59809e-10	-0.0784596	1	0.073131	1	0.0730157	1	0.148993	1	0.146379	1	0.33075	1	1.58666e-08	0.128152	0.375511	0.113822	4.78656e-10	0.243662	0.161879	-0.00893475	FALSE
Zfp292	0.198375	0.575411	0.179319	5.09025e-06	0.19835	1	0.15237	1.45309e-07	0.121019	1	0.188691	1	0.0899126	1	0.0579477	1	0.169684	1	-0.107241	1	0.120387	1	0.320407	1	0.235578	1	0.157534	1	0.337903	1	0.000318621	0.113799	0.00666167	0.127242	1	0.243007	0.161349	0.144686	FALSE
Dqx1	0.0212303	1	0.215949	1.65686e-05	0.153966	1	-0.0264694	1	0.077912	0.0698145	0.276397	1	-0.106891	1	0.183317	2.21465e-15	0.0950157	0.573891	0.126661	1	0.507578	1	0.287124	1	0.118236	1	0.436555	1	0.0516303	1	1	0.0265532	5.87946e-16	0.284262	0.999722	0.172827	0.161214	-0.0116654	FALSE
Cttnbp2nl	0.0453468	1	0.194176	0.082439	0.0925842	1	0.210245	6.177e-07	0.156193	1	0.11105	1	0.154073	0.00688794	0.197782	3.02941e-05	0.124603	1	0.0849134	1	0.287157	1	0.0395398	1	0.215363	1	0.176491	1	0.311044	1	3.04261e-05	0.141988	0.00401796	0.20236	1	0.135764	0.160037	0.102908	FALSE
Itgb4	0.0848002	1	-0.0512964	1	0.186045	1	0.163408	1.07389e-10	0.170374	1	0.162642	1	0.168677	3.03421e-08	0.132625	8.85062e-05	0.033075	1	0.429809	1	0.606004	0.538665	0.232654	1	0.0651938	1	-0.0458689	1	0.0602372	1	3.95107e-13	0.182378	0.0301914	0.162367	1	0.134931	0.159892	0.21572	FALSE
Fcer1g	-0.129108	1	-0.238217	0.574276	0.046919	1	-0.195862	0.00134159	0.337564	6.44889e-05	0.191431	1	0.264451	1	0.0399615	1	0.0994847	1	0.548944	1	-0.144992	1	0.218101	1	0.907246	0.510701	0.0551299	1	0.393601	1	0.148473	0.279134	0.0256271	0.00988939	1	0.189907	0.159644	0.333874	FALSE
Hdlbp	0.246903	0.0151651	0.01757	1	0.236925	0.00616078	0.144711	1.92163e-06	0.10266	1	0.0984073	1	0.169016	9.01256e-05	0.0687999	1	0.0588363	1	0.325439	1	0.198098	1	0.0467491	1	0.197162	1	0.192711	1	0.263774	1	6.46339e-08	0.216646	1	0.115968	0.424923	0.140938	0.157851	0.171132	FALSE
Runx1	0.10094	1	0.0619229	1	0.145301	1	0.0482411	1	0.0828173	1	0.211454	1	0.129238	0.000996739	0.168933	2.20005e-08	0.235023	0.000132646	0.0566736	1	0.352921	1	0.119865	1	0.11616	1	0.257881	1	0.274939	1	0.181265	0.0902506	0.000112533	0.184895	0.0574479	0.197316	0.157487	0.0809125	FALSE
Mthfd2	0.177663	1	0.285971	1.83469e-07	0.323701	0.0489609	0.00767906	1	0.165874	1	0.181915	1	0.0506519	1	0.14739	0.0038791	0.254383	0.000761517	0.0880236	1	0.0752031	1	0.334794	1	-0.00647858	1	-0.00132676	1	0.260916	1	1	0.0635079	7.11911e-06	0.134622	0.0257399	0.271142	0.156424	0.0313074	FALSE
Nav1	0.167252	1	0.0662427	1	0.19869	1	0.111437	0.000274959	0.198027	0.0551785	0.0729972	1	0.209066	9.42723e-08	0.138244	8.11124e-05	0.0493636	1	0.207904	1	0.450982	0.558346	0.144241	1	0.0992296	1	0.127592	1	0.0907582	1	4.5225e-07	0.158978	0.00401975	0.196217	1	0.11121	0.155468	0.118679	FALSE
Pck2	0.203438	1.20277e-07	0.186799	4.61409e-13	0.177688	0.123115	0.131849	8.44688e-13	0.10811	0.0712075	0.107068	1	0.166969	3.83074e-09	0.111356	1.24465e-06	0.147106	0.140372	0.240207	1	0.0765571	1	0.28112	0.105049	0.194712	1	0.0840044	1	0.103208	1	2.74406e-22	0.187435	7.41724e-15	0.113365	0.24553	0.163238	0.154679	0.122339	FALSE
Cxcl1	0.346846	1	0.51549	0.00581229	0.520032	1	-0.0416938	1	0.109569	1	0.171426	1	0.187362	1	-0.0174717	1	0.0907821	1	0.0899658	1	0.0349987	1	0.357343	1	0.0181301	1	-0.0138897	1	-0.0510795	1	1	0.120122	0.414957	0.125739	1	0.217701	0.154521	0.0577329	FALSE
Sik1	0.149192	1	0.209916	9.61565e-06	0.101503	1	0.302721	3.90228e-15	0.111594	1	0.129623	1	0.323403	3.44739e-13	0.136175	1	0.163663	1	0.188523	1	0.126854	1	0.0298292	1	0.356969	1	0.13681	1	-0.155668	1	8.77269e-22	0.264162	0.0103683	0.14427	1	0.05379	0.154074	0.154946	FALSE
Myof	0.284355	0.0127484	0.0783044	1	0.114964	1	0.142073	0.000157126	0.00733445	1	0.0821697	1	0.225824	1.6491e-07	0.0781173	1	0.0588568	1	0.300556	1	0.453755	1	0.192859	1	0.0943297	1	-0.0637863	1	0.257584	1	1.08417e-08	0.209428	1	0.110745	1	0.141287	0.15382	0.0804447	FALSE
Flnb	0.260274	0.00630232	0.0294567	1	0.15771	1	0.13385	0.000659808	0.0599663	1	0.0169074	1	0.192707	5.3208e-05	-0.0180777	1	0.0763689	1	0.425684	1	0.155481	1	0.224255	1	0.254672	1	0.131718	1	0.205256	1	2.71704e-06	0.253437	1	0.0717088	1	0.136099	0.153749	0.126107	FALSE
Prrc2c	0.207494	1	0.183387	0.00128745	0.280418	0.0113409	0.125026	0.257635	0.0364305	1	0.0313327	1	0.105595	1	0.0357295	1	0.112535	1	0.121244	1	0.10288	1	0.11658	1	0.328422	1	0.14176	1	0.36507	1	0.987406	0.177556	0.206843	0.100037	0.53603	0.181187	0.152927	0.127633	FALSE
Kctd11	0.208877	1	0.128072	0.732153	0.092114	1	0.123569	0.000748389	0.251903	7.96823e-06	0.182487	1	0.136347	1	0.0992707	0.669179	0.116996	1	0.221574	1	0.0830234	1	0.114195	1	0.241222	1	0.293179	1	-0.000717122	1	0.155717	0.186318	0.00552453	0.171089	1	0.101015	0.152807	0.126411	FALSE
Nisch	0.129263	1	0.0813519	1	0.0474158	1	0.161135	5.00998e-07	0.0934024	1	0.16524	1	0.136897	0.0192714	0.126996	5.59588e-05	0.0795115	1	0.131792	1	0.167163	1	-0.0125684	1	0.26475	1	0.344963	1	0.364169	1	5.86211e-05	0.164767	0.0334658	0.162775	1	0.128753	0.152099	0.14725	FALSE
Mxi1	0.0607575	1	0.0591156	1	0.164615	1	0.100222	1	0.0873648	1	0.0612191	1	0.117629	1	0.113576	1	0.191785	1	0.118522	1	0.0771633	1	0.0259934	1	0.245108	1	0.147992	1	0.710006	1	1	0.128448	1	0.0970422	1	0.230724	0.152071	-0.0100651	FALSE
mt-Co2	0.0531444	1	0.339521	6.14708e-20	0.158194	0.475532	0.141491	1.24317e-07	0.0486918	1	0.127787	1	0.161098	0.00027173	0.203466	1.34062e-07	0.264715	3.78957e-09	0.337705	1	0.113273	1	0.0322869	1	0.248999	1	0.194149	1	-0.147849	1	5.65277e-07	0.188488	4.78107e-21	0.17982	1.51946e-05	0.0870269	0.151778	0.277463	FALSE
Rara	0.103995	1	0.0240501	1	0.0925925	1	0.060225	1	0.10198	1	0.116764	1	0.0678471	1	0.0793265	1	0.134119	1	0.287431	1	0.0126292	1	0.218655	1	0.400204	0.027006	0.291568	1	0.278431	1	0.7042	0.18394	1	0.101911	1	0.168112	0.151321	0.116689	FALSE
Taf15	0.211824	0.366765	0.259169	8.49982e-12	0.196228	1	0.127238	0.000285861	0.147939	1	0.21484	0.562691	0.134424	0.044166	0.143602	0.0406647	0.157071	0.692839	0.0223153	1	0.242032	1	0.022398	1	0.0626334	1	0.119686	1	0.204912	1	0.00623246	0.111687	1.12755e-08	0.182486	0.997155	0.15909	0.151088	0.209786	FALSE
Arhgap42	0.078925	1	-0.0185621	1	0.0881937	1	0.159457	4.52144e-05	0.152593	1	0.0420829	1	0.223224	1.40024e-05	0.262176	3.65994e-08	0.0125141	1	0.195045	1	0.473211	1	0.0237342	1	0.40757	1	0.084202	1	0.0799086	1	6.46754e-06	0.212844	0.000167755	0.190724	1	0.0492867	0.150952	0.220782	FALSE
Ywhaz	0.0981185	1	-0.0245379	1	0.208814	1	0.131937	1.87698e-05	0.129361	1	0.0854614	1	0.172635	0.00112341	0.0805866	1	0.0576518	1	0.42784	1	0.322719	1	0.252796	1	0.129433	1	0.143895	1	0.0435189	1	0.000108833	0.191993	1	0.130405	1	0.129648	0.150682	0.115094	FALSE
Zfp575	0.0877139	1	0.255532	4.59193e-12	0.0394042	1	0.132505	3.68028e-06	0.21546	0.00370774	0.155818	1	0.0446028	1	0.203039	1.81944e-14	0.12839	1	0.331237	1	0.0959097	1	0.0581398	1	0.154463	1	0.231396	1	0.116925	1	0.00529824	0.150104	2.21536e-22	0.200267	1	0.0997355	0.150036	0.0494041	FALSE
Hnrnpm	0.188892	1	0.164208	0.010721	0.166061	1	0.115952	0.83071	0.0506238	1	0.127459	1	0.130725	1	0.0547644	1	0.129402	1	0.220249	1	0.364807	1	0.214918	1	0.197304	1	0.0548181	1	0.0699935	1	0.999998	0.170624	0.525369	0.137844	1	0.141567	0.150012	0.170435	FALSE
S100a16	0.0681486	1	-0.115782	1	0.0522081	1	0.209694	3.15663e-11	0.150242	0.0566746	0.167468	1	0.132894	0.000205363	0.106392	0.889149	0.0554202	1	0.354426	1	0.161644	1	0.0441203	1	0.423192	0.91771	0.186649	1	0.253102	1	3.23589e-10	0.237671	0.817289	0.0978289	1	0.114464	0.149988	0.227024	FALSE
Ttc3	0.146665	1	0.192087	1.54912e-06	0.0642672	1	0.191286	2.31885e-10	0.188389	0.283773	0.194865	1	0.237325	4.13057e-08	0.107756	1	0.0677526	1	0.132887	1	0.0668782	1	-0.0138572	1	0.371992	1	0.184245	1	0.110856	1	1.04491e-12	0.216031	0.00112455	0.147871	1	0.0847767	0.14956	0.158555	FALSE
Gm26825	0.0914655	1	0.0768137	0.158468	0.134278	1	0.199844	1.82548e-20	0.143263	0.0041779	0.163867	0.446535	0.139368	3.69938e-05	0.148791	1.01911e-10	0.175861	0.0774048	0.19437	1	0.13168	1	0.0677456	1	0.140318	1	0.241864	1	0.188574	1	2.90447e-19	0.153073	2.72491e-09	0.148482	0.750675	0.146065	0.149207	0.107289	FALSE
Mmp14	0.295978	0.0022327	0.105353	1	0.0584963	1	-0.00944943	1	0.0772986	1	0.0350947	1	0.271649	1.39376e-06	0.131877	0.64003	-0.0517402	1	0.411349	1	0.221426	1	0.147125	1	0.267518	1	0.229228	1	0.0465223	1	2.36475e-05	0.247409	0.999898	0.153037	1	0.0470996	0.149182	0.0985354	FALSE
Serpinf1	-0.0538826	1	0.130583	1	0.0211949	1	0.107028	1	0.2727	1	0.115816	1	0.0179637	1	0.0653739	1	0.0495718	1	0.190786	1	0.892898	0.427401	0.272995	1	-0.102005	1	0.042981	1	0.213411	1	1	0.0319781	0.998165	0.280907	1	0.134598	0.149161	0.200803	FALSE
Aldh1l2	0.111779	0.00265978	0.149813	1.82912e-12	0.249483	4.50711e-08	0.18074	3.47408e-39	0.13481	4.79147e-06	0.197073	1.28894e-07	0.112672	1.24135e-12	0.122504	1.00736e-22	0.179349	1.75368e-15	0.219528	0.30545	0.196709	1	0.210495	1	0.0500745	1	0.032766	1	0.0872305	1	3.46233e-47	0.134959	2.51621e-33	0.12732	8.95878e-24	0.184726	0.149002	0.131778	FALSE
Hmg20b	0.24723	0.00177912	0.154395	0.0117069	0.157747	1	0.170818	9.07414e-11	0.0836847	1	0.0178664	1	0.136933	0.00193082	0.148295	0.000131443	0.152152	1	0.235338	1	0.216934	1	0.115966	1	0.24808	1	0.108455	1	0.030717	1	2.3682e-11	0.20768	0.00283259	0.142353	1	0.0948897	0.148307	0.085468	FALSE
Pafah1b1	0.172295	1	0.111748	0.866421	0.177511	1	0.154735	5.07856e-06	0.143475	1	0.113444	1	0.203983	2.51567e-08	0.139876	0.000399872	0.133464	1	0.179627	1	0.233978	1	0.0415476	1	0.181677	1	0.139289	1	0.0852068	1	4.75308e-09	0.178463	0.101494	0.153673	1	0.110235	0.147457	0.10524	FALSE
Nmt1	0.14158	1	0.0125017	1	0.043016	1	0.146557	2.38035e-07	0.12141	1	0.15788	1	0.107856	0.198931	0.0739037	1	0.0888589	1	0.194787	1	0.0960828	1	0.14388	1	0.295747	1	0.222503	1	0.363096	1	0.000205083	0.177305	1	0.10528	1	0.159346	0.147311	0.105573	FALSE
Rsrc1	0.144401	1	0.0570828	1	0.216226	0.0190008	0.120051	0.0207916	-0.00467018	1	0.122805	1	0.197253	5.8647e-08	0.111861	1	0.195706	0.00390789	0.200042	1	0.20443	1	0.183844	1	0.171872	1	0.128485	1	0.157077	1	1.10571e-05	0.166724	1	0.0994377	0.0400591	0.175131	0.147098	0.149975	FALSE
P4ha1	0.114379	1	0.0750762	1	0.121213	1	0.135778	0.0930269	0.0932232	1	0.164594	1	0.111992	1	0.124921	0.0922468	0.0858836	1	0.00157486	1	-0.00258385	1	-0.0568623	1	0.404582	1	0.388625	1	0.437251	1	0.907257	0.153661	0.906216	0.135852	1	0.150416	0.146643	0.081638	FALSE
Hnrnpa3	0.313345	0.0240446	0.26756	3.98895e-06	0.20784	1	0.203201	4.80506e-05	0.0384582	1	-0.0246434	1	0.177513	0.294423	0.0488578	1	0.120597	1	0.34852	1	0.173151	1	0.263429	1	0.199067	1	-0.0169012	1	-0.123555	1	0.000927878	0.248329	0.0056094	0.102225	1	0.0887334	0.146429	0.140905	FALSE
Flot1	0.0244952	1	0.143835	0.00530166	0.0239832	1	0.108218	0.00777391	0.12861	1	0.0155274	1	0.183441	5.54703e-05	0.171811	5.76681e-05	0.0706714	1	0.0845019	1	0.415823	0.305996	0.0883114	1	0.270584	1	0.080999	1	0.375845	1	0.00110849	0.134248	0.000347433	0.188216	1	0.114868	0.145777	0.109653	FALSE
Nckap1	0.156164	1	0.128894	0.0248628	0.0867616	1	0.14602	1.05991e-08	0.123587	1	0.0557573	1	0.124182	0.832495	0.0989819	1	0.0596086	1	0.192457	1	0.227654	1	0.0173007	1	0.195346	1	0.292291	1	0.276836	1	5.45641e-05	0.162834	0.688304	0.174281	1	0.0992529	0.145456	0.075189	FALSE
Gnai3	0.153544	1	0.100624	1	0.181252	1	0.131897	0.000279614	0.10538	1	0.0876953	1	0.14473	0.00691682	0.0896756	1	0.0757738	1	0.178811	1	0.225356	1	0.140532	1	0.276804	1	0.12223	1	0.162735	1	0.00334271	0.177157	1	0.128653	1	0.129598	0.145136	0.130457	FALSE
Hjurp	0.12026	1	0.0831324	1	0.126555	1	0.173526	3.8249e-07	0.0953355	1	0.130816	1	0.113741	1	0.123015	1	0.204037	1	0.178434	1	0.142108	1	0.255814	1	0.2415	1	-0.0460393	1	0.220329	1	0.00101328	0.165492	1	0.0795104	1	0.18751	0.144171	0.153177	FALSE
Cited2	0.135943	1	0.0331689	1	-0.0213244	1	0.267862	1.77881e-05	0.198031	1	0.376067	0.0842152	0.196621	0.0857999	0.0260391	1	0.168445	1	0.094923	1	-0.256219	1	-0.0499544	1	0.257885	1	0.334437	1	0.392491	1	0.00281576	0.190647	1	0.0670914	0.894575	0.173145	0.143628	0.0954966	FALSE
Cbx5	0.206652	0.589648	0.108757	1	0.142292	1	0.209098	1.18696e-13	0.113844	1	0.147978	1	0.125367	0.00415579	0.0546639	1	0.127131	1	0.34088	1	0.169211	1	0.262511	1	0.054924	1	-0.0143123	1	0.105203	1	2.22647e-11	0.187384	1	0.0864327	1	0.157023	0.143613	0.129851	FALSE
Nfib	0.242288	0.124237	0.18047	0.00806665	0.196661	1	0.165779	5.85951e-06	0.0316189	1	0.0850272	1	0.291111	1.34666e-15	0.159174	0.000430387	0.157211	1	0.170834	1	0.082985	1	0.00496074	1	0.185324	1	0.0439244	1	0.154996	1	2.43362e-16	0.211067	0.00508332	0.0996343	1	0.119771	0.143491	0.1032	FALSE
Arhgap23	0.0722574	1	0.167771	0.017376	0.066763	1	0.125895	0.00518604	0.11745	1	0.144682	1	0.0972871	0.0703436	0.136502	4.95235e-05	0.0981262	1	0.263923	1	0.142414	1	0.175713	1	0.216055	1	0.290222	1	0.0369428	1	0.104535	0.155084	0.00185142	0.170872	1	0.104446	0.143467	0.086152	FALSE
Iqgap1	0.241348	0.873423	0.0939323	1	0.146384	1	0.11163	0.0483217	0.0980408	1	0.100505	1	0.126023	0.0328798	0.0589061	1	0.0847508	1	0.203482	1	0.32771	1	0.190872	1	0.198531	1	0.0982441	1	0.066644	1	0.214852	0.176203	1	0.135367	1	0.117831	0.143134	0.134352	FALSE
Susd6	0.139133	1	0.0530104	1	0.136933	1	0.172674	1.59019e-05	0.0924582	1	0.182525	1	0.195868	4.23674e-06	0.0822013	0.364202	0.173565	1	0.0530691	1	0.221811	1	0.0817843	1	0.18813	1	0.326946	1	0.043338	1	1.00903e-06	0.149775	0.996184	0.155285	1	0.123629	0.142896	0.00287789	FALSE
Hilpda	-0.00291382	1	-0.0259727	1	-0.0119546	1	0.0377737	1	0.0870435	1	0.23913	1	0.251612	0.820912	0.174318	1	0.204896	1	-0.328527	1	-0.155274	1	0.508777	1	0.25073	1	0.291458	1	0.605872	1	0.999998	0.0417352	1	0.0743148	1	0.309344	0.141798	-0.0154029	FALSE
Trove2	0.163234	0.675554	0.143963	0.000505548	0.218605	0.646236	0.0991532	0.0243164	0.0930058	1	0.00305964	1	0.117281	1	0.123436	0.00053392	0.0821739	1	0.212125	1	0.287049	1	0.212261	1	0.127981	1	0.0591176	1	0.18364	1	0.607586	0.143955	0.000779496	0.141314	0.999908	0.139948	0.141739	0.129146	FALSE
Tpm1	0.203183	1	-0.0132955	1	0.0340845	1	0.225048	4.02613e-14	0.139764	1	0.0405084	1	0.211309	1.9648e-07	0.146915	5.58707e-06	0.152244	0.0557066	0.419387	1	-0.0168363	1	0.0904757	1	0.116902	1	0.12311	1	0.242259	1	1.65244e-15	0.235166	0.00711146	0.0759314	0.833774	0.111914	0.141004	0.172677	FALSE
Serpine1	0.193214	1	0.128576	1	0.021176	1	0.29102	0.0163776	0.261379	1	0.0978065	1	0.125148	1	0.305887	0.000212959	0.0136765	1	-0.0117445	1	0.0184999	1	0.0865617	1	0.106198	1	0.494568	1	-0.0222578	1	0.606998	0.140767	0.076406	0.241782	1	0.0393926	0.140647	0.218086	FALSE
Tspo	0.148631	1	-0.043637	1	0.130228	1	0.0297129	1	0.00545618	1	-0.0598015	1	0.0246024	1	0.0999738	1	-0.0799448	1	0.465598	0.649874	0.631376	0.0478449	0.366325	1	0.214496	1	0.184287	1	-0.0161489	1	0.999913	0.176608	0.808533	0.175491	1	0.0681316	0.140077	0.33671	FALSE
Ralbp1	0.0513594	1	0.19784	8.15362e-07	0.0342249	1	0.10044	0.565362	0.102435	1	0.0902833	1	0.131241	0.0125449	0.0747742	1	0.142567	1	0.356685	1	0.230472	1	0.272794	1	0.168419	1	0.130021	1	-0.00615918	1	0.449536	0.161629	0.0017793	0.147108	1	0.106742	0.138493	0.120585	FALSE
Tpm3	0.274587	1	0.0736749	1	0.269792	0.0120466	0.157466	0.00413187	0.08793	1	0.171068	1	0.161386	0.935231	0.0584467	1	0.109442	1	0.242538	1	0.0836972	1	0.12209	1	0.161344	1	0.0870172	1	0.0126557	1	0.348861	0.199464	1	0.0781532	0.547549	0.13701	0.138209	0.0470976	FALSE
Ubr2	0.0764038	1	0.140448	0.101934	0.106275	1	0.0841479	1	0.0856469	1	0.0826873	1	0.149636	0.000184084	0.0794393	1	0.106012	1	0.357625	1	0.220628	1	0.216826	1	0.191948	1	-0.0354058	1	0.210367	1	0.0700491	0.171952	0.918175	0.0981511	1	0.144434	0.138179	0.109395	FALSE
Mlec	0.274899	0.0461567	0.16051	0.0520456	0.14132	1	0.115792	0.0378899	0.154189	1	0.0349708	1	0.152157	0.305205	0.0941964	1	0.078868	1	0.18484	1	0.292948	1	-0.0426153	1	0.252714	1	0.124943	1	0.0528978	1	0.129491	0.196081	0.822662	0.165357	1	0.0530882	0.138175	0.180006	FALSE
Ndufv3	0.118817	1	0.0376657	1	0.0743735	1	0.118494	0.000751157	0.0723684	1	0.235049	0.0928773	0.127146	0.118503	0.069364	1	0.146705	0.175902	0.200089	1	0.149679	1	0.229719	1	0.0249988	1	0.227966	1	0.23928	1	0.0448921	0.117909	1	0.111409	0.606517	0.185025	0.138114	-0.0190675	FALSE
Bnip3l	0.0774188	1	0.0045475	1	0.209144	1	0.152324	0.32331	0.222264	1	0.159868	1	0.193207	0.752664	0.060885	1	0.0841387	1	-0.0393783	1	-0.0183281	1	0.166702	1	0.24004	1	0.195	1	0.362661	1	0.985216	0.124722	1	0.0928737	1	0.196503	0.138033	0.116007	FALSE
Vps4b	0.0340769	1	-0.0025628	1	0.0903543	1	0.119247	3.7141e-05	0.0648849	1	0.134641	1	0.121795	0.0218743	0.0704681	1	0.104351	1	0.261529	1	0.269462	1	0.277708	1	0.190274	1	0.179012	1	0.149372	1	0.00177458	0.145384	1	0.116253	1	0.151285	0.137641	0.0255128	FALSE
Ext1	0.126102	1	0.222083	0.000176323	0.125949	1	0.0828021	1	0.108647	1	0.219727	1	0.0980572	1	0.117319	1	0.140561	1	0.159573	1	0.189737	1	0.141294	1	0.265277	1	0.0125565	1	0.0527529	1	1	0.146362	0.0682624	0.130069	1	0.136057	0.137496	0.0984443	FALSE
Ap2b1	0.079637	1	0.0279864	1	0.0578399	1	0.15801	7.0137e-12	0.124308	1	0.121597	1	0.14868	0.000473137	0.0614845	1	0.128491	1	0.222042	1	0.331147	1	0.121054	1	0.112882	1	0.149006	1	0.217628	1	1.93277e-10	0.14425	1	0.138786	1	0.129322	0.137453	0.140691	FALSE
Tead1	0.174403	0.0831474	0.192574	1.33928e-07	0.149025	1	0.103488	0.0112743	0.111538	1	0.075116	1	0.128942	0.00507862	0.0927952	1	0.0726699	1	0.202921	1	0.385058	1	0.0655727	1	0.116844	1	0.137265	1	0.0503519	1	0.00635547	0.145319	0.00045756	0.183846	1	0.0825471	0.137238	0.140787	FALSE
Hsp90b1	0.304509	0.267071	0.144192	1	0.118367	1	0.247038	9.54397e-12	0.203971	1	0.0938539	1	0.211804	0.00148814	0.10778	1	0.0492135	1	0.175911	1	0.00903266	1	0.171015	1	0.337264	1	0.0126912	1	-0.133598	1	2.17514e-10	0.255305	1	0.0955332	1	0.0597702	0.13687	0.3175	FALSE
Bod1l	0.182277	1	0.077823	1	0.107035	1	0.162458	1.33183e-05	0.120717	1	0.13139	1	0.115827	1	0.109871	1	0.185815	0.470608	-0.0672697	1	0.0590097	1	-0.0957928	1	0.377096	1	0.264782	1	0.321434	1	0.0129572	0.154078	1	0.126441	0.998912	0.129976	0.136832	0.138216	FALSE
Gsk3b	0.145187	1	0.098227	1	0.113005	1	0.0918256	0.135568	0.0927431	1	0.137788	1	0.119478	0.910939	0.163075	0.00601918	0.102124	1	0.132712	1	0.0906219	1	0.146227	1	0.194931	1	0.144805	1	0.267216	1	0.938708	0.136827	0.420928	0.117894	1	0.153272	0.135998	0.124859	FALSE
Fbln2	-0.0839716	1	0.27973	0.00017062	0.445083	1	0.0531737	1	0.198794	1	0.153168	1	-0.103952	1	0.170902	1	0.0794724	1	-0.0439109	1	0.385165	1	0.0394413	1	-0.080455	1	0.334694	1	0.202416	1	1	-0.0518231	0.0669262	0.273857	1	0.183916	0.135317	0.128288	FALSE
Fndc3b	0.0564391	1	0.0134797	1	0.133409	1	0.141195	0.0835238	0.165884	1	0.21037	1	0.165399	0.00152562	0.223094	3.96472e-10	0.123949	1	0.168818	1	0.0831345	1	0.106439	1	0.345495	1	0.0695327	1	0.0105701	1	0.0560536	0.175469	4.40061e-06	0.111025	1	0.116947	0.134481	0.0910402	FALSE
Zranb2	0.139885	1	0.0629136	1	0.194884	1	0.105249	0.078424	0.109164	1	0.193178	1	0.133215	0.0188655	0.118453	0.0033645	0.172304	1	0.302989	1	0.0831954	1	0.174691	1	0.0638596	1	0.139507	1	0.0178506	1	0.221883	0.149039	0.328029	0.102647	1	0.150582	0.134089	0.0151295	FALSE
Eef2	0.112069	1	0.276404	4.64971e-15	0.0490065	1	0.119489	2.15467e-06	0.194783	0.000387564	0.112447	1	0.0912825	1	0.0937622	0.0218644	0.0886946	1	0.122205	1	0.312394	1	0.16749	1	0.166745	1	0.0494641	1	0.0547046	1	0.00361353	0.122358	7.16975e-15	0.185361	1	0.0944686	0.134063	0.0662451	FALSE
Cast	0.120626	1	0.00294265	1	0.0813181	1	0.128935	0.0244387	0.0209745	1	0.133067	1	0.206881	1.29654e-07	0.0992623	1	0.00152127	1	0.324364	1	0.292516	1	-0.0274456	1	0.302641	1	0.179665	1	0.141798	1	2.39948e-05	0.216689	1	0.119072	1	0.0660518	0.133938	0.149291	FALSE
Col6a2	0.148075	1	-0.0689483	1	0.190536	1	0.0605366	1	0.1364	1	-0.0434478	1	0.0876085	1	0.219819	1	0.0262016	1	0.110166	1	0.719683	1	0.0123363	1	0.337597	1	0.0537822	1	0.0117934	1	1	0.148797	1	0.212147	1	0.0394839	0.133476	0.0959619	FALSE
Nsa2	0.194753	0.234308	0.161523	3.48896e-05	0.202986	0.00976636	0.203319	9.20282e-19	0.0624567	1	0.150459	1	0.181623	1.59681e-06	0.0902503	1	0.0566215	1	0.0075059	1	0.00636213	1	0.118805	1	0.166307	1	0.12927	1	0.267305	1	1.55251e-19	0.150702	0.0246471	0.0899724	0.507841	0.159235	0.133303	0.0129878	FALSE
Marcks	0.204251	0.371958	0.128946	0.013724	0.0427015	1	0.0135011	1	0.0869426	1	0.109246	1	0.0555454	1	0.140141	0.00461084	0.0652331	1	0.283938	1	0.208485	1	0.0492135	1	0.0288488	1	0.376855	1	0.204681	1	0.996506	0.117217	0.0361979	0.188274	1	0.094215	0.133235	0.114703	FALSE
Afdn	0.121804	1	0.218644	5.23697e-08	0.134205	1	0.110462	1	-0.0179617	1	0.0868169	1	0.137881	0.208416	0.0612359	1	0.0744744	1	0.151876	1	0.206395	1	0.284472	1	0.0924495	1	0.0781744	1	0.256502	1	0.978028	0.122895	0.000221794	0.109297	1	0.167294	0.133162	0.125485	FALSE
Trib1	-0.050853	1	0.0795062	1	0.200977	1	0.0151247	1	0.156262	1	0.236769	1	0.10203	1	0.126479	1	0.229553	0.030581	0.142513	1	0.344642	1	0.0909681	1	-0.00910804	1	0.195219	1	0.133806	1	1	0.0399413	1	0.180421	0.727826	0.178415	0.132926	0.0684187	FALSE
Junb	0.0868895	1	0.187343	0.394479	-0.0248592	1	0.146513	0.216739	0.10703	1	-0.164876	1	0.37222	2.05606e-09	0.270464	0.000960984	0.0568524	1	0.283858	1	0.11657	1	-0.165506	1	0.473155	1	0.208817	1	0.0355711	1	4.84555e-06	0.272527	0.106849	0.178045	1	-0.0525635	0.132669	0.322373	FALSE
Cbx3	0.189503	1	0.0930922	1	0.12099	1	0.0960406	0.065699	0.0438678	1	0.164209	1	0.127027	0.335201	0.0857342	1	0.191668	0.0258569	0.217583	1	0.0680027	1	0.0948178	1	0.125126	1	0.204243	1	0.16618	1	0.664791	0.151056	1	0.0989879	0.695857	0.147573	0.132539	0.0066284	FALSE
Zbtb38	-0.0094642	1	0.137585	0.13856	0.104376	1	0.0677314	1	0.0233156	1	0.0831596	1	0.180515	0.107137	0.159209	0.0383628	0.0791638	1	0.0923558	1	0.0796765	1	0.0992839	1	0.122984	1	0.294721	1	0.465459	1	0.923815	0.0908243	0.399916	0.138901	1	0.166288	0.132005	0.05553	FALSE
Plod2	0.0462576	1	0.0961009	1	0.174507	1	-0.00948099	1	0.100828	1	0.154904	1	-0.0447102	1	0.0894753	1	0.109924	1	0.222305	1	-0.0175085	1	0.0780185	1	0.21933	1	0.13418	1	0.625528	1	1	0.0867404	1	0.080615	1	0.228576	0.131977	-0.0488615	FALSE
Cep164	0.160003	1	0.0741444	1	0.0776858	1	0.113146	7.27196e-05	0.0399731	1	0.0589863	1	0.110381	0.199355	0.0679717	1	0.119165	1	0.30358	1	0.327473	1	0.281495	1	0.0643443	1	0.10171	1	0.0789979	1	0.0137254	0.150291	1	0.122254	1	0.123266	0.131937	0.102894	FALSE
Ndrg1	-0.155812	1	-0.128686	1	0.150682	1	-0.0666576	1	0.233458	1	0.523173	2.77662e-07	-0.115856	1	0.0372523	1	0.171525	1	-0.0517941	1	-0.265979	1	0.291832	1	0.209943	1	0.47612	1	0.667599	1	1	-0.0360352	1	0.070433	0.000796311	0.360962	0.131787	-0.0589183	FALSE
Ncor1	0.202185	0.623439	0.148221	0.00015935	0.101527	1	0.11025	0.00187343	0.110423	1	0.0892413	1	0.126378	0.106735	0.106681	1	0.0638868	1	0.095144	1	0.169445	1	0.172711	1	0.193912	1	0.0960169	1	0.182646	1	0.0553055	0.145574	0.0642237	0.126157	1	0.122003	0.131245	0.186356	FALSE
Nfix	0.247923	0.142695	0.236484	7.89831e-08	0.131242	1	0.150947	0.000150722	-0.00560115	1	-0.0750869	1	0.13493	0.184883	0.0633811	1	0.0368805	1	0.391324	0.700062	0.270874	1	0.271656	1	0.269741	1	-0.0795394	1	-0.0772868	1	0.00434267	0.238973	0.000304919	0.0971196	1	0.057481	0.131191	0.239447	FALSE
Bace1	0.15085	1	0.0792782	1	0.145156	1	0.148103	1.14874e-07	0.0509112	1	-0.023531	1	0.143823	0.000151247	0.0862521	1	0.0933341	1	0.123748	1	0.167738	1	0.202683	1	0.286786	1	0.0581089	1	0.253718	1	3.22607e-07	0.170662	1	0.0884576	1	0.134272	0.131131	0.12392	FALSE
Sf3b2	0.183338	0.202988	0.129192	0.0557198	0.158735	1	0.151068	6.12888e-08	0.0351479	1	0.112747	1	0.173398	2.53604e-07	0.0449247	1	0.123024	0.347991	0.277887	1	0.169203	1	0.0871989	1	0.235124	1	-0.062081	1	0.147064	1	1.84841e-10	0.204163	0.833812	0.0632773	0.995415	0.125754	0.131065	0.223902	FALSE
Eif1a	0.147122	1	0.0855112	1	0.108356	1	0.0694567	1	0.0259844	1	0.11961	1	0.0404759	1	0.0914492	1	0.0780524	1	0.319788	1	0.195409	1	0.181686	1	0.106324	1	0.203293	1	0.175624	1	1	0.136633	1	0.120329	1	0.132666	0.129876	0.0926536	FALSE
Cald1	0.230932	0.0894888	0.147282	0.592681	0.08563	1	0.069709	1	0.128744	1	0.000544376	1	0.139377	0.000378652	0.157006	7.90672e-08	0.123452	0.822529	0.296574	1	0.150079	1	0.00912748	1	0.18275	1	0.161123	1	0.0653513	1	0.0241801	0.183868	0.000203426	0.148847	0.999998	0.0568209	0.129845	0.20989	FALSE
mt-Co3	0.0483105	1	0.419318	4.34405e-23	0.0861788	1	0.08095	1	-0.00177862	1	0.0508492	1	0.143108	0.0193663	0.156446	0.00699339	0.163742	0.719748	0.343821	1	0.166792	1	0.0585737	1	0.251275	1	0.150626	1	-0.174249	1	0.639732	0.173493	1.38179e-19	0.178281	0.999976	0.0370189	0.129597	0.204236	FALSE
Caprin1	0.128763	1	0.276387	5.95008e-09	0.118483	1	0.161068	0.0140923	0.0958062	1	0.142636	1	0.0683443	1	0.0380167	1	0.139956	1	0.0828635	1	0.0929982	1	0.153048	1	0.143859	1	0.103949	1	0.195643	1	0.577768	0.11698	3.98254e-05	0.121431	1	0.149953	0.129455	0.0757962	FALSE
Bclaf1	0.207033	1	0.11215	1	0.11309	1	0.106294	0.00740798	0.100699	1	0.127653	1	0.0864754	1	0.0750467	1	0.188427	0.0417145	-0.031876	1	0.0666415	1	0.255511	1	0.194887	1	0.170061	1	0.169714	1	0.457283	0.112563	1	0.10492	0.784713	0.170879	0.129454	0.132204	FALSE
Tnks2	0.224206	0.736792	0.161993	0.00017389	0.107461	1	0.137086	0.00308798	0.0932584	1	0.0196683	1	0.161168	0.000827854	0.110962	0.76876	0.0919648	1	-0.125539	1	0.25128	1	0.0615567	1	0.202633	1	0.165314	1	0.265112	1	0.00327942	0.119911	0.0577211	0.156561	1	0.109153	0.128542	0.0621422	FALSE
AC149090.1	0.0137582	1	0.0869798	0.736456	0.0128448	1	0.135727	7.11284e-07	0.0735747	1	0.0822569	1	0.155834	2.09019e-05	0.1997	2.34135e-17	0.186558	0.564254	0.0662084	1	0.132803	1	0.149803	1	0.0739255	1	0.167006	1	0.3901	1	2.8276e-07	0.0890907	1.77362e-12	0.132013	0.999682	0.164313	0.128472	0.124736	FALSE
Tmem205	0.149725	1	-0.0113564	1	0.107996	1	0.110386	0.00300882	0.06225	1	0.081185	1	0.143887	0.0114025	0.120054	0.000906709	0.153838	1	0.24448	1	0.139731	1	0.0948412	1	0.235739	1	0.24386	1	0.0429851	1	0.0243774	0.176843	0.172473	0.110908	1	0.096169	0.127973	0.148035	FALSE
Wwc2	0.127311	1	0.141586	0.158649	0.032658	1	0.158295	3.56349e-07	0.048353	1	-0.0060405	1	0.158065	0.00262769	0.100413	1	0.0622719	1	0.203037	1	0.199337	1	0.175546	1	0.170999	1	0.0553002	1	0.291373	1	8.91233e-06	0.163541	0.96055	0.108998	1	0.111162	0.1279	0.117344	FALSE
Csnk1a1	0.208711	0.491371	0.0755089	1	0.14334	1	0.100687	0.258969	0.0626702	1	0.126173	1	0.174968	0.0012379	0.154186	0.00099524	0.123352	1	0.200432	1	0.137016	1	0.0816321	1	0.260289	1	0.0306668	1	0.0317009	1	0.0637773	0.189017	0.181122	0.0920095	1	0.10124	0.127422	0.110677	FALSE
Atad2	0.163339	1	0.0741117	1	0.100896	1	0.151323	1	0.0911075	1	0.210909	1	0.00856396	1	-0.0270321	1	0.158361	1	0.027544	1	0.312027	1	0.313198	1	0.00866792	1	-0.0350306	1	0.33981	1	1	0.0718876	1	0.0830367	1	0.224635	0.12652	0.149204	FALSE
Nktr	0.0715312	1	0.0522491	1	0.0902447	1	0.112456	0.00177848	0.0735751	1	0.108014	1	0.10681	0.521837	0.108974	0.754175	0.139012	1	0.264901	1	0.106211	1	-0.0522396	1	0.35591	0.0470847	0.117774	1	0.24054	1	0.0285383	0.182322	0.999988	0.0917566	1	0.105114	0.126397	0.133283	FALSE
Stk17b	0.124657	1	0.0415645	1	0.0841881	1	0.0512748	1	0.118979	1	0.177441	1	0.0993783	1	0.0740644	1	0.113834	1	0.150797	1	0.0871265	1	0.179227	1	0.111788	1	0.1403	1	0.335014	1	1	0.107579	1	0.0924067	1	0.177941	0.125975	0.0674538	FALSE
Klf7	0.147013	1	0.0600442	1	0.115612	1	0.104245	1	0.0531312	1	0.074645	1	0.147409	0.0325658	0.138131	0.000126101	0.158979	1	0.0340554	1	0.168563	1	0.250239	1	0.0990925	1	0.334869	1	-0.00495305	1	0.739621	0.106363	0.0556958	0.150948	1	0.118904	0.125405	0.103914	FALSE
Hook3	0.0261951	1	0.103235	1	0.0893974	1	0.12154	0.000152935	0.137872	1	0.0105031	1	0.170957	3.7627e-06	0.10596	0.615178	0.0263932	1	0.238878	1	0.16845	1	0.0950126	1	0.20983	1	0.0366263	1	0.335492	1	5.97972e-06	0.15348	0.999849	0.110429	1	0.11136	0.125089	0.154675	FALSE
1700020I14Rik	0.074731	1	0.130996	0.00203799	0.0435495	1	0.104893	0.000319196	0.264263	2.86304e-05	0.0774877	1	0.107336	1	0.160901	0.000194989	0.143759	1	0.361481	1	-0.081617	1	0.164297	1	0.10629	1	0.104008	1	0.112705	1	0.0968218	0.150946	2.2541e-07	0.11571	1	0.10836	0.125005	0.163358	FALSE
Bcl10	0.150221	1	0.291246	1.65503e-12	0.253971	0.625505	0.066126	1	0.173627	0.263073	0.0297487	1	-0.00226917	1	0.122526	0.182043	0.0945995	1	0.03443	1	0.0675662	1	0.168046	1	0.125335	1	0.167163	1	0.131496	1	1	0.0747685	3.13592e-09	0.164426	0.999872	0.135572	0.124922	-0.0480474	FALSE
Anp32a	0.171784	1	0.0934212	1	0.128172	1	0.0413659	1	0.0572232	1	0.131647	1	0.0961075	1	0.0996044	1	0.100715	1	0.229455	1	0.200823	1	0.170326	1	-0.095803	1	0.164583	1	0.283806	1	1	0.0885819	1	0.123131	1	0.162933	0.124882	0.090453	FALSE
Rsrc2	0.15831	1	0.112815	1	0.150748	1	0.104148	1	0.0874631	1	0.191504	1	0.0830264	1	0.093423	1	0.19862	0.0283701	-0.0426322	1	-0.00280546	1	0.169829	1	-0.0067001	1	0.294561	1	0.274269	1	1	0.0592305	1	0.117091	0.713609	0.196994	0.124439	0.169244	FALSE
Setd5	0.115612	1	0.153456	8.6808e-05	0.144155	1	0.130221	7.31327e-05	0.0816432	1	0.16568	1	0.0983176	0.265698	0.10794	0.347478	0.179912	0.271296	-0.0324305	1	0.145313	1	0.11832	1	0.0845664	1	0.123108	1	0.246269	1	0.0167234	0.0792572	0.022401	0.122292	0.989189	0.170867	0.124139	0.128365	FALSE
Ugdh	0.126606	1	0.154946	0.34232	0.176359	1	0.0953553	1	-0.046332	1	0.0802903	1	0.148349	0.450207	0.0338992	1	0.0433419	1	-0.142749	1	0.187526	1	0.309681	1	0.196462	1	0.149665	1	0.3425	1	0.998604	0.0848045	0.995112	0.0959408	1	0.190434	0.123727	0.145913	FALSE
Brd7	0.0936001	1	0.0558887	1	0.0785858	1	0.156983	3.34535e-08	0.0760263	1	0.124198	1	0.138137	0.0129731	0.0772134	1	0.097195	1	0.154351	1	0.119148	1	0.163805	1	0.0869131	1	0.278889	1	0.154951	1	4.74109e-06	0.125997	1	0.121433	1	0.123747	0.123726	0.0980055	FALSE
Yme1l1	0.0902808	1	0.181052	8.89406e-07	0.0597899	1	0.122836	0.000144039	0.0941691	1	0.095997	1	0.112302	1	0.108574	0.00017122	0.163585	1	0.300026	1	0.133457	1	0.0841699	1	0.233951	1	-0.00491683	1	0.0729082	1	0.0604079	0.171879	1.99253e-06	0.102467	1	0.0952901	0.123212	0.106669	FALSE
Ubap2l	0.062137	1	-0.00473454	1	0.0851284	1	0.178874	3.57378e-09	0.109629	1	0.0380852	1	0.156188	0.000403079	0.0760746	1	0.19252	0.000270694	0.0812945	1	0.031541	1	0.227076	1	0.292383	1	0.166747	1	0.151895	1	3.86165e-08	0.154175	1	0.0758514	0.0879916	0.138941	0.122989	-0.0145773	FALSE
Pbrm1	0.170188	1	0.221417	7.96533e-08	0.136702	1	0.115485	0.00174941	0.0352814	1	0.0346848	1	0.173323	0.000693126	0.0808765	1	0.108274	1	0.105699	1	0.337479	1	0.157983	1	0.0718593	1	-0.00476152	1	0.0937494	1	0.00238118	0.127311	0.000306915	0.134058	1	0.106278	0.122549	0.142169	FALSE
Tbrg1	0.0202094	1	-0.0494262	1	0.174094	1	0.101897	0.0642552	0.0265551	1	0.167439	1	0.1123	0.542361	0.0220517	1	0.169173	0.00665759	0.149516	1	0.22172	1	0.468488	0.0101796	-0.0346664	1	0.0304955	1	0.255188	1	0.752193	0.0698512	1	0.0502793	0.0378099	0.246876	0.122336	0.144255	FALSE
Rps12	0.143624	0.0989206	0.229314	3.49278e-20	0.179185	3.96739e-06	0.0773684	0.000931564	0.110035	1	0.165293	2.78658e-05	0.135595	3.60752e-07	0.129777	5.53538e-12	0.137512	1.41282e-11	-0.0861772	1	0.173244	1	0.156343	1	-0.0833479	1	0.15396	1	0.208177	1	5.57705e-07	0.0374125	2.13406e-25	0.159266	3.73337e-16	0.169302	0.121994	-0.111923	FALSE
Bptf	0.137428	1	0.136834	0.00757918	0.131484	1	0.113264	0.298787	0.033471	1	0.00647753	1	0.132559	0.378886	0.0199237	1	0.0429311	1	0.142176	1	0.186121	1	0.180924	1	0.230756	1	0.111124	1	0.219485	1	0.929804	0.151237	0.461374	0.0974947	1	0.11626	0.121664	0.105027	FALSE
Csrp2	0.28539	1	0.0817229	1	0.188727	1	-0.0853726	1	-0.0112401	1	-0.116661	1	0.153077	1	0.206927	0.000142313	0.147008	1	0.226143	1	0.215366	1	0.0514943	1	0.113613	1	-0.0495162	1	0.418175	1	1	0.13857	0.0599665	0.0886519	1	0.137749	0.121657	-0.0387827	FALSE
Sparc	0.356723	0.00418044	0.232331	0.474262	-0.070572	1	0.290645	2.06721e-09	0.333227	0.176975	-0.133757	1	0.344649	2.04454e-10	0.203896	0.00170357	-0.169639	1	0.0665617	1	0.068423	1	0.0569777	1	0.296827	1	0.00931491	1	-0.0634247	1	4.18084e-16	0.271081	0.0601384	0.169438	1	-0.0760829	0.121479	0.338535	FALSE
Fam173a	0.121815	1	-0.0110274	1	0.107768	1	0.165074	5.58838e-11	0.0576234	1	0.164443	1	0.237854	5.22807e-11	0.0904297	1	0.156468	1	0.232798	1	0.219097	1	0.212551	1	0.0276044	1	0.0395049	1	-0.023048	1	6.63299e-16	0.157029	1	0.0791255	1	0.123636	0.11993	0.159658	FALSE
Prrc2b	0.0977677	1	0.111442	1	0.0496238	1	0.12462	0.00114676	0.0407139	1	-0.015669	1	0.155535	0.00491412	0.149555	0.000227174	0.15655	1	0.157672	1	0.232656	1	0.256584	1	-0.0284162	1	0.139413	1	0.168504	1	0.0071544	0.101436	0.0793857	0.134756	1	0.123119	0.11977	0.0964114	FALSE
Zcchc24	0.154279	0.0708824	0.108405	0.00559472	0.0666299	1	0.0838181	0.000520395	0.0889173	1	0.0778863	1	0.0900211	0.00688165	0.0584679	1	-0.00748945	1	0.0746465	1	0.26331	1	0.0903385	1	0.316315	0.116629	0.142416	1	0.188494	1	0.000142096	0.143816	0.408496	0.132303	1	0.0831719	0.119764	0.0717168	FALSE
Tnnt2	0.229622	1	-0.161638	1	0.247392	0.145611	0.0850794	1	0.0945595	1	0.0398302	1	0.158271	1	0.0753023	1	0.00393085	1	0.0766137	1	0.3234	1	0.173415	1	0.239705	1	0.275801	1	-0.0751665	1	1	0.157858	1	0.121485	0.953709	0.0778804	0.119074	-0.109257	FALSE
Crebbp	0.123337	1	0.0635183	1	0.101962	1	0.0329766	1	0.0374296	1	0.0583726	1	0.135078	0.0622481	0.0600604	1	0.093603	1	0.353981	1	0.130369	1	0.0588143	1	0.271444	1	0.190374	1	0.073709	1	0.851298	0.183363	1	0.0963502	1	0.0772922	0.119002	0.0750887	FALSE
Macf1	0.211619	1	0.256329	9.1546e-08	0.0366703	1	0.130151	0.0623252	0.11173	1	0.030821	1	0.184057	2.15574e-05	0.0634104	1	0.0526112	1	0.278434	1	0.0596251	1	0.077753	1	0.217096	1	0.0824869	1	-0.0188936	1	0.00256632	0.204271	0.000341677	0.114716	1	0.0357924	0.11826	0.173858	FALSE
Krcc1	0.276954	0.00141109	0.102137	1	0.169371	1	0.112706	0.0322636	0.136103	1	0.120998	1	0.122118	0.0380432	0.130739	0.00997029	0.0779258	1	0.152787	1	0.171885	1	-0.101035	1	0.203886	1	0.157335	1	-0.0634252	1	0.00308633	0.17369	0.511707	0.13964	1	0.0407669	0.118032	0.189424	FALSE
Supt20	0.156761	0.577967	0.109366	0.0132526	0.130719	1	0.122276	5.19735e-06	0.116696	0.182928	0.110462	1	0.118269	0.00644158	0.0903724	1	0.16222	1	0.110179	1	0.0736807	1	0.0640555	1	0.115415	1	0.126599	1	0.162845	1	0.000101705	0.12458	0.282093	0.103343	1	0.12606	0.117994	0.0559818	FALSE
Kmt2a	0.198616	1	0.221725	1.19155e-05	0.18288	1	0.164484	8.72092e-08	0.135888	1	0.0899659	1	0.148462	0.00951385	0.077804	1	0.103623	1	0.292109	1	0.0806979	1	0.0377789	1	0.101388	1	-0.0260464	1	-0.0401327	1	8.07256e-06	0.181012	0.0120105	0.0980136	1	0.0748231	0.117949	0.116995	FALSE
Crebrf	0.0285657	1	0.140634	0.701919	0.14505	1	0.0717432	1	0.0935723	1	0.0487181	1	0.0963945	0.0211577	0.103469	1	0.0987521	1	0.0630997	1	0.179723	1	0.0579748	1	0.219979	1	0.156883	1	0.263784	1	0.656993	0.0959564	0.999965	0.134856	1	0.122856	0.117889	0.0545032	FALSE
Washc5	0.0113508	1	0.0490863	1	0.042861	1	0.128013	8.7444e-06	0.0603574	1	0.137895	1	0.0687784	1	0.0735852	1	0.0461641	1	0.151309	1	0.195083	1	0.187498	1	0.32126	1	0.0920889	1	0.201835	1	0.00971123	0.136142	1	0.0940401	1	0.123251	0.117811	0.0262012	FALSE
Qk	0.256917	8.00688e-05	0.222208	7.21333e-11	0.094619	1	0.0703289	1	0.121751	1	-0.0416991	1	0.127875	0.0243279	0.116238	0.166153	0.059385	1	0.0843427	1	0.255157	1	0.150475	1	0.0878904	1	0.139256	1	0.0213489	1	0.00336	0.125471	2.35581e-07	0.170922	1	0.0568258	0.117739	0.133129	FALSE
Tgfb1	0.0421578	1	-0.0792463	1	0.05075	1	0.0747881	1	0.21199	0.0623375	0.0872818	1	0.174752	0.000447245	0.231759	1.82869e-07	0.16185	1	0.212591	1	0.221244	1	-0.0261548	1	0.26959	1	0.121089	1	0.00702992	1	0.117325	0.154776	6.69007e-05	0.141367	1	0.0561513	0.117431	0.114971	FALSE
Kifap3	0.132707	1	-0.0580486	1	0.07941	1	0.114015	0.000262815	0.0397055	1	-0.00330209	1	0.164983	0.000355862	0.0981963	1	0.104083	1	0.133914	1	0.24932	1	0.276266	1	0.283339	1	0.091068	1	0.0516246	1	0.000347353	0.165792	1	0.0840482	1	0.101616	0.117152	0.0158768	FALSE
mt-Nd2	0.0876098	1	0.447055	8.83576e-22	0.111275	1	0.183306	1.98332e-10	0.0943458	1	0.132432	1	0.0590253	1	0.215417	5.04838e-05	0.184443	0.247717	0.00923321	1	-0.159972	1	-0.0948471	1	0.225883	1	0.315193	1	-0.0579178	1	2.48145e-06	0.113011	2.31347e-20	0.182408	0.985925	0.055077	0.116832	0.277797	FALSE
Tnrc18	0.153259	1	0.140462	0.000192736	0.121314	1	0.0939217	0.428719	0.0413158	1	0.0605369	1	0.125402	0.00534309	0.0968118	0.0557051	0.0723391	1	0.0743216	1	0.231587	1	0.0901612	1	0.189575	1	0.0619812	1	0.196019	1	0.274634	0.127296	0.0111839	0.114432	1	0.108074	0.116601	0.0501363	FALSE
Enc1	0.0390809	1	0.0327744	1	0.0755545	1	0.103299	0.406022	0.139398	1	0.131725	1	0.209057	5.91141e-05	0.125185	0.0670793	0.0370667	1	0.215869	1	0.172079	1	0.0628821	1	0.111445	1	0.149707	1	0.143746	1	0.019257	0.13575	0.862628	0.123829	1	0.0901948	0.116591	0.169503	FALSE
Golgb1	0.180153	1	0.0721552	1	0.144197	1	0.135589	0.0089527	0.12882	1	0.109734	1	0.152619	0.00286649	0.0393112	1	0.116732	1	0.203018	1	0.0134966	1	0.0941772	1	0.272456	1	0.027819	1	0.0530873	1	0.020132	0.188767	1	0.0563205	1	0.103586	0.116224	0.1186	FALSE
Tpr	0.126358	1	0.0687592	1	0.201983	0.164565	0.112668	0.0176567	0.0805307	1	0.0915533	1	0.127784	0.141579	0.0341153	1	0.076613	1	0.212341	1	0.183246	1	0.162259	1	0.102566	1	-0.00103496	1	0.156531	1	0.286191	0.136343	1	0.0731232	0.963271	0.137788	0.115751	0.199928	FALSE
B230219D22Rik	0.133067	1	0.152244	4.28036e-06	0.129663	1	0.141471	1.93737e-06	0.138853	0.236552	0.0936159	1	0.169056	6.12898e-06	0.107852	0.0893125	0.224752	0.00836953	0.042152	1	0.0810785	1	0.144981	1	0.0333878	1	0.194879	1	-0.0518894	1	2.33728e-07	0.103827	0.000338468	0.134981	0.479329	0.108225	0.115677	-0.0370537	FALSE
Rpl36	-0.0697324	1	0.3427	1.84902e-24	0.203805	0.000156814	-0.00864362	1	0.0559963	1	0.29705	4.92775e-18	-0.0626832	1	0.0352719	1	0.273298	3.72497e-35	-0.0728737	1	-0.131203	1	0.427801	1.01395e-07	-0.1247	1	0.168613	1	0.39733	0.0215323	1	-0.0677265	7.40235e-19	0.0942756	1.28509e-57	0.319857	0.115469	-0.469028	FALSE
Tra2a	0.0999369	1	0.197011	0.000243296	0.125646	1	0.075053	1	0.150877	1	0.171762	1	0.0957038	1	0.120674	1	0.242571	4.72149e-05	-0.020169	1	0.0151306	1	0.0372449	1	-0.0107783	1	0.433689	1	-0.00266142	1	1	0.0479493	0.0826593	0.183476	0.030003	0.114912	0.115446	0.0697212	FALSE
Zmiz1	0.0661032	1	0.0617934	1	0.0710055	1	0.0697697	1	0.0526666	1	0.0909972	1	0.0944183	0.110826	0.0816366	0.254028	0.0746404	1	-0.00999398	1	0.160983	1	0.137444	1	0.424825	0.663099	0.204148	1	0.148033	1	0.875916	0.129024	0.986887	0.112246	1	0.104424	0.115231	0.0356591	FALSE
Skil	0.0884447	1	0.135124	1	0.168856	1	0.0690121	1	0.0545307	1	0.0539445	1	0.152597	0.0705171	0.186854	0.000161959	0.163886	1	0.0469781	1	0.19985	1	0.148145	1	-0.0147944	1	0.124754	1	0.14921	1	0.869982	0.0684474	0.0648568	0.140223	1	0.136808	0.115159	0.0361517	FALSE
Morf4l1	0.178673	1	-0.0773134	1	0.0515264	1	0.16259	1.21391e-12	0.0160486	1	0.0767473	1	0.331543	2.52195e-29	0.107837	0.374998	0.172034	0.00370136	0.18259	1	0.124239	1	0.15417	1	0.171708	1	-0.0655475	1	0.137249	1	1.00883e-34	0.205421	0.996626	0.0210527	0.342293	0.118346	0.11494	-0.0424204	FALSE
Hadha	0.240612	0.00581426	0.0820734	1	0.152425	1	0.168262	2.29714e-09	-0.01936	1	0.0838595	1	0.213392	3.89437e-08	0.0722671	1	0.0328113	1	0.198679	1	0.0662319	1	0.218315	1	0.055821	1	0.0763115	1	0.08165	1	7.50359e-14	0.175353	1	0.0555048	1	0.113812	0.11489	0.149697	FALSE
Aplp2	0.15132	1	0.251454	1.47021e-06	0.130995	1	0.0682612	1	-0.105992	1	0.0748468	1	0.222342	2.49883e-05	-0.0285329	1	0.0349658	1	0.48522	1	0.202009	1	0.0743369	1	0.0594447	1	0.0639671	1	0.0298761	1	0.0197793	0.197318	0.00274027	0.0765809	1	0.0690042	0.114301	0.0164502	FALSE
Zfhx3	0.174579	1	0.219299	5.63672e-09	0.0639049	1	0.120437	8.20312e-06	0.0690103	1	0.0191481	1	0.152377	1	0.108881	0.0766698	0.0671156	1	-0.00200988	1	0.245017	1	0.273125	1	0.109411	1	0.0700625	1	0.0205501	1	0.00929167	0.110959	4.72464e-06	0.142454	1	0.0887688	0.114061	0.0688404	FALSE
Cyb5r1	0.25211	0.00491179	0.112036	1	0.171017	1	0.110927	0.000466709	0.168168	0.0792117	0.049535	1	0.213009	5.49522e-06	0.129506	0.00020777	0.0933349	1	0.137238	1	0.0439132	1	-0.0163258	1	0.146382	1	0.0461035	1	0.0530919	1	2.45737e-07	0.171933	0.0149554	0.0999453	1	0.0701307	0.114003	0.15039	FALSE
Amotl1	0.089412	1	0.0631767	1	0.121575	1	0.17775	5.50205e-11	0.18109	0.90582	0.12893	1	0.13942	0.202997	0.124477	0.000134117	0.0706666	1	0.169381	1	0.139271	1	0.192604	1	0.0272217	1	-0.0143643	1	0.0987303	1	2.21905e-07	0.120637	0.0544358	0.0987301	1	0.122501	0.113956	0.120352	FALSE
Sh3kbp1	-0.0316598	1	0.00673624	1	0.0451049	1	0.061282	1	0.0489492	1	0.103471	1	0.212534	1.2629e-06	0.142178	0.00472707	0.0761718	1	0.233081	1	0.298575	1	0.200631	1	0.231777	1	-0.00907391	1	0.0891376	1	0.00245298	0.141403	0.380643	0.097473	1	0.102903	0.113926	0.127924	FALSE
Kdm1a	0.12261	1	0.154173	0.0859633	0.0339068	1	0.110931	0.00288628	0.0490907	1	0.0690616	1	0.0732044	1	0.0829275	1	0.0823379	1	0.275882	1	-0.0154512	1	0.192008	1	0.224839	1	0.2102	1	0.0423617	1	0.305947	0.161493	0.89726	0.0961881	1	0.0839352	0.113872	0.0198315	FALSE
Spata7	0.0298654	1	0.41757	0.0211452	0.120669	1	0.0766054	1	0.140569	1	0.431107	1	0.0304342	1	0.356442	0.11126	0.616588	0.701773	-0.353639	1	-0.00313783	1	0.0795159	1	-0.502101	1	0.24755	1	0.0178431	1	1	-0.143767	0.278127	0.231799	0.999965	0.253145	0.113725	-0.120901	FALSE
Smad4	0.11295	1	0.0893374	1	0.0772716	1	0.0961083	0.0330541	0.0868422	1	0.0604456	1	0.0707057	1	0.0433352	1	0.0268596	1	0.147171	1	0.165783	1	0.144677	1	0.275135	1	0.251063	1	0.0544605	1	0.742394	0.140414	1	0.127272	1	0.0727428	0.113476	0.0486728	FALSE
Nfat5	0.079734	1	0.0872309	1	0.179251	1	0.0466678	1	0.0633853	1	0.107285	1	0.134632	0.297674	0.0828542	1	0.0697714	1	0.277776	1	0.0978701	1	0.180964	1	0.0975516	1	-0.0155709	1	0.212677	1	0.991944	0.127272	1	0.0631539	1	0.14999	0.113472	0.0528571	FALSE
Tmco1	0.118734	1	-0.0673985	1	0.180601	1	0.0651231	1	0.0705999	1	0.0809056	1	0.173248	3.51729e-05	0.0843121	1	0.115171	1	0.00123902	1	0.133965	1	0.25252	1	0.0981247	1	0.139723	1	0.24868	1	0.0247779	0.0912938	1	0.0722401	1	0.175576	0.113037	0.0329555	FALSE
Magt1	0.0976683	1	0.112448	1	0.119513	1	0.0431941	1	0.116801	1	-0.0144348	1	0.230838	4.71251e-05	0.195284	1.29141e-06	0.12914	1	0.156197	1	0.0258801	1	0.0948644	1	0.258296	1	0.13814	1	-0.0110338	1	0.0299661	0.157239	0.00249327	0.11771	1	0.0636097	0.112853	0.171287	FALSE
Apol9b	0.111278	1	-0.0804916	1	0.0877395	1	0.0444238	1	0.120344	1	0.227108	1	-0.0274386	1	0.130097	0.00547518	0.0646192	1	0.047194	1	0.116192	1	0.356419	1	-0.0078068	1	0.267133	1	0.23151	1	1	0.03353	0.404864	0.110655	1	0.193479	0.112555	0.126556	FALSE
Usp8	0.0586413	1	0.102907	1	0.0186902	1	0.142245	8.16546e-08	0.0927377	1	0.155133	1	0.0560507	1	0.0211262	1	0.0153686	1	0.0469239	1	0.297275	1	0.0383568	1	0.383127	0.505251	0.0248771	1	0.231332	1	0.000184199	0.137397	1	0.107785	1	0.091776	0.112319	0.0659355	FALSE
Apol9a	0.151111	1	-0.0525841	1	0.115221	1	0.0441529	1	0.116607	1	0.166429	1	-0.0442564	1	0.109842	1	0.186968	1	0.0324883	1	0.083751	1	0.302819	1	-0.0439936	1	0.310158	1	0.205749	1	1	0.0279004	1	0.113555	1	0.195437	0.112297	0.177705	FALSE
Phf3	0.165364	1	0.105715	1	0.158836	1	0.110473	0.199889	0.0618842	1	0.102051	1	0.121293	0.260142	0.0777483	1	0.0704254	1	-0.0429815	1	0.122841	1	0.112066	1	0.12572	1	0.202028	1	0.188075	1	0.822515	0.0959739	1	0.114043	1	0.126291	0.112103	0.0905324	FALSE
Dcaf8	0.111811	1	0.0288012	1	0.0779298	1	0.157386	6.96257e-10	0.0511247	1	0.113429	1	0.154904	2.09074e-05	0.0662469	1	0.0633836	1	0.0268501	1	0.083877	1	-0.0586496	1	0.328654	1	0.15607	1	0.313857	1	7.11333e-10	0.155921	1	0.0772239	1	0.10199	0.111712	0.1177	FALSE
Chmp3	0.0921207	1	0.021167	1	0.0576139	1	0.135651	2.62439e-07	0.0772285	1	0.116021	1	0.141207	0.0217866	0.137933	0.000505464	0.0109204	1	0.183222	1	0.382799	1	0.130014	1	0.108117	1	0.256165	1	-0.176391	1	3.85741e-05	0.132063	0.125634	0.175059	1	0.0276356	0.111586	0.163884	FALSE
Cwf19l2	0.173473	0.360181	0.065532	1	0.149836	1	0.106758	0.00202662	0.0697405	1	0.0933985	1	0.166407	1.99027e-06	0.124093	0.000573345	0.159134	1	0.108158	1	0.0289275	1	0.0447958	1	0.221475	1	0.0276609	1	0.131828	1	1.27531e-05	0.155254	0.134707	0.0631907	1	0.115798	0.111414	0.0601025	FALSE
Hif1a	0.0613879	1	0.113187	0.424741	0.188809	1	0.0706099	1	0.103648	1	0.204096	1	0.106813	1	0.110064	1	0.166845	1	-0.158932	1	0.200029	1	0.237747	1	-0.118683	1	0.110926	1	0.272063	1	1	-0.00776082	0.998106	0.127571	1	0.213912	0.111241	-0.0604789	FALSE
Top2a	0.294688	1	0.244335	1	0.248989	1	0.182461	1	-0.170166	1	-0.0111864	1	-0.0584524	1	-0.0557578	1	0.290297	1	0.18805	1	0.0517835	1	0.361771	1	0.428548	1	-0.327384	1	-0.00355391	1	1	0.207059	1	-0.051438	1	0.177263	0.110961	0.164099	FALSE
Actn1	0.0714314	1	0.163241	0.0079522	0.14659	1	0.0146631	1	0.0870704	1	0.0700793	1	-0.0785912	1	0.0729847	1	0.0773331	1	0.0210271	1	0.317244	1	0.289329	1	-0.102439	1	0.182085	1	0.329849	1	1	-0.0147817	0.470032	0.164525	1	0.182636	0.110793	0.102313	FALSE
Alkbh5	0.161553	1	0.148771	0.0369465	0.185124	1	0.0686096	1	0.0708018	1	0.133437	1	0.0364401	1	-0.040294	1	0.0896736	1	-0.0864578	1	0.14609	1	0.133256	1	0.150911	1	0.136976	1	0.319889	1	1	0.0662111	0.762903	0.0924689	1	0.172276	0.110319	0.0592208	FALSE
Cnot3	0.164181	1	0.109608	1	0.1576	1	0.0917313	0.00228644	0.0474952	1	0.123596	1	0.111056	0.278484	0.102801	0.904467	0.184885	0.0266334	0.0965378	1	0.12058	1	0.105715	1	0.180312	1	-0.0300744	1	0.0871523	1	0.142674	0.128764	1	0.0700821	0.701538	0.13179	0.110212	0.124391	FALSE
Ckap4	0.225514	1	0.0709924	1	0.0526846	1	0.125308	0.00241801	0.0684893	1	-0.00523074	1	0.0772641	1	0.0117599	1	0.0483199	1	0.23921	1	0.482765	1	0.252958	1	0.111809	1	-0.094722	1	-0.0143228	1	0.281749	0.155821	1	0.107857	1	0.0668817	0.110187	0.178709	FALSE
Rfc1	0.159005	1	0.0542305	1	0.17511	1	0.146059	0.000231766	0.130906	1	0.18118	1	0.127725	0.283884	0.0725724	1	0.174213	0.328405	0.00219356	1	-0.0261278	1	0.200355	1	0.0581261	1	0.099463	1	0.0975079	1	0.0371061	0.0986218	1	0.0662089	0.994286	0.165673	0.110168	0.0217606	FALSE
Ltbp4	0.0262598	1	0.21708	1.73408e-14	0.0889696	1	0.0625182	1	0.0981721	1	0.10706	1	0.0577511	1	0.135891	3.36227e-09	0.101912	1	0.129366	1	0.188811	1	0.0750885	1	0.0960632	1	0.139966	1	0.126166	1	1	0.0743917	1.8073e-17	0.155984	1	0.099839	0.110072	0.0272114	FALSE
Acbd3	0.127453	1	0.00676656	1	0.199431	1	0.0982742	1	-0.0248463	1	0.0891843	1	0.145566	0.662308	0.0464561	1	0.0781242	1	0.0495567	1	0.191535	1	0.15369	1	0.151381	1	0.15798	1	0.177553	1	0.99993	0.114446	1	0.0755782	1	0.139596	0.109874	0.103507	FALSE
Arhgef2	0.089893	1	0.0943181	1	0.132244	1	0.108932	0.00901379	0.171876	0.0174638	0.148332	1	0.111532	1	0.125102	0.0490816	0.0832921	1	0.10381	1	-0.0298772	1	0.137019	1	0.110498	1	0.119546	1	0.141236	1	0.492946	0.104933	0.16742	0.0961929	1	0.128425	0.10985	0.073263	FALSE
Adamts4	0.00254978	1	0.0324427	1	0.185461	1	0.0307949	1	0.00407474	1	0.0626836	1	0.0370139	1	0.131481	0.0097479	0.0404754	1	0.347218	1	0.186387	1	0.135369	1	0.148046	1	0.164283	1	0.139405	1	1	0.113125	0.507488	0.103734	1	0.112679	0.109846	-0.0261993	FALSE
Elk3	0.113495	1	0.126428	0.0227328	0.138957	1	0.063848	1	0.0837087	1	-0.00315565	1	0.182465	8.44437e-08	0.110437	0.0411063	0.0562872	1	0.0427056	1	0.335606	1	0.163343	1	0.0478149	1	-0.0681035	1	0.248483	1	0.000321061	0.0900656	0.175235	0.117615	1	0.120783	0.109488	0.0841781	FALSE
Zfp638	0.061368	1	0.064256	1	0.14333	1	0.106421	0.0215969	0.147658	0.542807	0.0410791	1	0.181264	1.9447e-08	0.070837	1	0.136022	1	0.0908151	1	0.293008	1	-0.0545734	1	0.00452493	1	0.154741	1	0.201193	1	4.61474e-06	0.0888787	0.999572	0.1461	1	0.0934101	0.109463	0.170511	FALSE
Uhrf2	0.145452	1	0.0805469	1	0.0564682	1	0.0518171	1	0.0442694	1	0.0545351	1	0.0694898	1	0.0652412	1	0.0715697	1	0.0766457	1	0.155238	1	0.0466285	1	0.351885	1	0.171867	1	0.198694	1	1	0.139058	1	0.103432	1	0.0855791	0.109357	0.0447681	FALSE
mt-Nd4l	-0.0245524	1	0.191992	0.537443	0.270223	0.0572204	0.070151	1	0.0348422	1	0.242924	1	0.0147817	1	0.0541492	1	0.319069	8.0351e-08	0.0269445	1	-0.0923338	1	0.247049	1	0.0372067	1	0.156087	1	0.0910625	1	1	0.0249063	0.99954	0.0689474	3.23831e-05	0.234066	0.109306	-0.0432267	FALSE
Zbtb20	0.17453	1	0.173182	0.0172801	0.0981636	1	0.17052	6.72593e-10	0.0753433	1	0.0186089	1	0.224608	6.70853e-08	0.13859	0.00494401	0.146658	1	0.0681907	1	0.0653231	1	-0.0351232	1	0.18491	0.434328	0.0509944	1	0.0828519	1	1.9899e-12	0.164552	0.0437529	0.100687	1	0.0622319	0.109157	0.106494	FALSE
Rnf6	0.15889	1	0.0558915	1	0.150418	1	0.0885324	0.384631	0.0298466	1	0.137025	1	0.132176	0.00226796	0.0419461	1	0.090157	1	0.082708	1	0.191	1	0.191037	1	0.0580137	1	0.122881	1	0.106328	1	0.168985	0.104064	1	0.088313	1	0.134993	0.109123	0.0776586	FALSE
Glrp1	0.120651	1	0.0153907	1	0.0885506	1	0.0852782	0.0393067	0.0632246	1	0.207797	0.176003	0.0480487	1	0.117511	0.000703242	0.157596	1	0.1625	1	0.0717835	1	0.121996	1	0.0754849	1	0.164275	1	0.126292	1	0.774108	0.0983926	0.150582	0.0864368	0.967957	0.140446	0.108425	0.0618045	FALSE
Rlf	0.0862624	1	0.127141	3.65338e-06	0.0633965	1	0.057435	1	0.1003	1	0.0422492	1	0.11777	0.0436618	0.10183	1	0.163853	1	-0.0238336	1	-0.0234833	1	0.0822619	1	0.213896	1	0.24138	1	0.274532	1	0.792743	0.0903059	0.00527073	0.109434	1	0.125259	0.108333	0.127245	FALSE
Kmt2e	0.180909	1	0.0738753	1	0.143457	1	0.0888189	0.63206	0.0994529	1	-0.00544967	1	0.180491	0.00146776	0.113096	1	0.139215	1	-0.043968	1	0.0293715	1	0.0111727	1	0.343225	1	0.1313	1	0.138804	1	0.174568	0.149895	1	0.0894192	1	0.0854397	0.108251	0.126782	FALSE
Tsn	0.208256	0.661891	0.023342	1	0.205042	1	0.0878524	0.245199	0.0293061	1	0.0260833	1	0.0818624	1	0.0199394	1	0.0425899	1	0.247955	1	0.299719	1	0.111932	1	0.221435	1	0.0244242	1	-0.00645204	1	0.962252	0.169472	1	0.0793462	1	0.0758391	0.108219	0.207519	FALSE
Gtpbp2	0.081872	1	0.186466	1.58985e-11	0.111842	1	0.0542579	1	0.102506	0.910467	0.0277769	1	0.0818472	0.00436178	0.117212	2.00886e-07	0.0627799	1	0.0811972	1	0.165129	1	0.01353	1	0.219117	1	0.208952	1	0.106897	1	0.367756	0.103658	3.56495e-13	0.156053	1	0.0645652	0.108092	0.079387	FALSE
Brd4	0.180092	1	0.196436	1.45912e-06	0.123604	1	0.0992008	0.145938	0.00993047	1	0.0471538	1	0.0611301	1	0.0450099	1	0.0742251	1	0.280522	1	0.155298	1	0.359317	0.148467	0.137178	1	-0.0438388	1	-0.104945	1	0.953896	0.151625	0.00272522	0.0725671	0.955316	0.099871	0.108021	0.095821	FALSE
Psat1	0.264324	0.00163846	0.146616	0.0634413	0.329997	0.000131595	0.103417	1	0.0841153	1	0.214033	1	0.0918861	1	0.0698726	1	0.112089	1	0.193655	1	0.0140689	1	0.0975962	1	-0.0731373	1	-0.0730319	1	0.04391	1	0.233448	0.116029	0.854213	0.0483281	0.0571692	0.159525	0.107961	0.0331131	FALSE
Tlk1	0.067014	1	0.131031	0.0185474	-0.017435	1	0.103759	0.0156676	0.091014	1	0.0481833	1	0.0460585	1	0.0778734	1	0.0631141	1	0.130179	1	0.0647183	1	0.113727	1	0.234985	1	0.254224	1	0.208321	1	0.598358	0.116399	0.631293	0.123772	1	0.0831821	0.107784	0.081991	FALSE
Gtf2i	0.129525	1	0.159292	0.0014854	0.104377	1	0.130156	1.35647e-05	0.111992	1	0.134591	1	0.183911	3.16396e-06	0.119502	0.0297812	0.0880889	1	-0.0181255	1	0.177829	1	-0.0596687	1	0.255274	1	0.112401	1	-0.012942	1	6.91322e-07	0.136148	0.0287657	0.136203	1	0.0508893	0.107747	0.129642	FALSE
Nfkbiz	0.091297	1	0.103263	1	0.213299	1	-0.00151141	1	0.0125895	1	0.181729	1	0.126178	1	0.101212	1	0.2019	1	0.108987	1	0.107999	1	0.13612	1	-0.0148547	1	-0.0159345	1	0.261763	1	1	0.0620191	1	0.061826	1	0.198962	0.107602	0.108823	FALSE
Aff4	0.0793824	1	0.0782101	1	0.0354297	1	0.138234	0.00285506	0.0948656	1	0.0742567	1	0.130248	0.786146	0.131913	0.00690423	0.115136	1	-0.0497104	1	0.229795	1	-0.0497214	1	0.253446	1	0.107892	1	0.24267	1	0.271988	0.11032	0.444781	0.128535	1	0.0835543	0.10747	0.043651	FALSE
Bmpr2	0.0440259	1	0.0293567	1	0.0192131	1	0.0914674	0.0799549	0.137736	1	0.0141895	1	0.0866329	1	0.125486	0.0442063	0.0406844	1	0.0470953	1	0.219887	1	-0.0204508	1	0.224759	1	0.24876	1	0.302148	1	0.887638	0.0987962	0.794906	0.152245	1	0.0711568	0.107399	0.0533102	FALSE
Ghitm	0.145409	1	0.115003	0.774633	0.227411	0.189619	0.0642704	1	0.0957405	1	0.163403	1	0.152931	0.027204	0.066184	1	0.00985066	1	0.180912	1	-0.0700271	1	0.233949	1	0.194195	1	0.0335817	1	-0.0036057	1	0.705599	0.147544	0.999993	0.0480964	0.972695	0.126202	0.107281	0.164956	FALSE
Specc1	0.328405	0.00400491	0.165314	0.0162101	0.158682	1	0.121122	0.423211	0.00469338	1	0.110754	1	0.126753	1	0.0468583	1	0.0509413	1	0.0705835	1	0.155147	1	0.036326	1	0.0320949	1	0.15829	1	0.0431992	1	0.237388	0.135792	0.604994	0.106061	1	0.0799804	0.107278	0.0663716	FALSE
Aebp1	0.0669553	1	0.12351	0.0258544	-0.0467073	1	0.161101	0.000738115	0.121831	1	0.0450019	1	0.109415	1	0.0681754	1	0.09299	1	0.267777	1	0.113661	1	0.0455462	1	0.305455	1	0.146469	1	-0.0170609	1	0.154564	0.182141	0.695838	0.114729	1	0.023954	0.106941	0.0406778	FALSE
Dhrs7	0.0155179	1	0.0741693	0.420663	0.135121	1	0.0500605	1	0.054068	1	0.188061	1	0.0674944	1	0.0574118	1	0.104749	1	-0.013062	1	-0.132898	1	0.207167	1	0.267136	1	0.215335	1	0.309493	1	1	0.0774293	0.998013	0.0536172	1	0.188918	0.106655	0.0643989	FALSE
Nfic	0.262763	0.000235331	0.0623588	1	0.0531326	1	0.140357	2.02319e-06	0.042632	1	0.0158174	1	0.0854068	1	0.0383928	1	0.0207908	1	0.208095	1	0.287153	1	0.222621	1	0.13696	1	-0.00400101	1	0.0219542	1	5.11693e-06	0.166716	1	0.0853071	1	0.0668631	0.106295	0.14507	FALSE
Vcp	0.227686	0.384329	0.103035	1	0.148234	1	0.0890397	0.158478	-0.0223941	1	0.0659676	1	0.0987803	1	-0.0304169	1	-0.0265631	1	0.325817	1	0.095366	1	0.23091	1	0.280963	1	0.163743	1	-0.156104	1	0.847926	0.204457	1	0.0618666	1	0.0524889	0.106271	0.158251	FALSE
Clcn3	0.0711064	1	0.118079	0.793247	0.200619	1	0.0278571	1	0.0864809	1	0.0951535	1	0.0679319	1	0.0590486	1	0.087989	1	-0.0142532	1	-0.0645399	1	0.289737	1	0.200109	1	0.221013	1	0.145375	1	1	0.0705503	0.999995	0.0840165	1	0.163775	0.106114	0.0415341	FALSE
Gm26735	0.107289	1	0.194417	1.65853e-12	0.0761725	1	0.048263	1	0.159885	1	0.145402	1	0.101609	1	0.12337	2.95359e-05	0.132286	1	0.0473234	1	0.0668558	1	0.126233	1	0.0755194	1	0.142158	1	0.0421605	1	1	0.0760007	4.52895e-12	0.137337	1	0.104451	0.10593	0.0090297	FALSE
Slc48a1	0.100394	1	0.124719	0.591922	0.111789	1	0.215823	3.56223e-13	0.0798743	1	0.0363379	1	0.0540754	1	0.0119537	1	0.0429669	1	0.224407	1	-0.0399335	1	0.178956	1	0.32634	1	0.106735	1	0.0110598	1	1.15737e-08	0.184208	0.999786	0.0566698	1	0.076222	0.1057	0.205195	FALSE
Snx6	0.156207	1	0.0498228	1	0.0754258	1	0.0920503	1	0.0695345	1	0.0861664	1	0.161185	9.93462e-06	0.0714031	1	0.13136	1	0.0185578	1	0.145618	1	0.065585	1	0.0562918	1	0.225345	1	0.179247	1	0.0106036	0.0968586	1	0.112345	1	0.107557	0.105587	0.0856128	FALSE
Rps29	0.118376	1	0.186399	7.50478e-13	0.334811	1.30821e-18	0.0648346	1	0.0870084	1	0.321484	1.5246e-20	0.0112212	1	0.101626	1.0376e-05	0.292435	3.50807e-43	-0.29909	1	0.0676596	1	0.225783	0.601637	-0.293926	1	0.106663	1	0.255395	1	1	-0.0797169	8.67114e-13	0.109871	2.10293e-73	0.285981	0.105379	-0.478064	FALSE
Rock2	0.129723	1	0.106381	0.527386	0.0931952	1	0.151724	0.000461496	0.0770813	1	0.0158386	1	0.176648	8.33827e-06	0.0862669	1	0.108828	1	-0.18143	1	0.198356	1	0.00706487	1	0.118502	1	0.186386	1	0.303308	1	2.80634e-05	0.0790335	0.999474	0.130894	1	0.105647	0.105192	0.0984988	FALSE
Xist	0.0554306	1	0.352248	1.87451e-07	0.321103	1	-0.00124672	1	0.232679	1	0.118296	1	0.0268659	1	-0.109782	1	0.180309	1	0.28023	1	0.239391	1	0.208929	1	0.149717	1	-0.182901	1	-0.294528	1	1	0.102199	0.000591318	0.106327	1	0.106822	0.105116	0.105051	FALSE
Afap1	0.00615814	1	0.0923605	1	0.101436	1	0.0440394	1	0.0545774	1	0.0898277	1	0.0904672	1	0.0720079	1	0.136237	1	-0.115551	1	0.218381	1	0.305393	1	0.141243	1	0.232999	1	0.106745	1	1	0.0332714	1	0.134065	1	0.147928	0.105088	-0.00987558	FALSE
Dnajc11	0.112415	1	0.111925	1	0.0936924	1	0.133063	7.40157e-06	0.174319	1	0.102472	1	0.12574	0.0695487	0.0875057	1	0.171669	1	0.181921	1	0.145186	1	-0.00179072	1	0.0413264	1	0.158707	1	-0.0630646	1	0.00126519	0.118893	1	0.135529	1	0.0605956	0.105006	0.0768573	FALSE
Dnajc3	0.281115	0.601576	0.0212346	1	0.117036	1	0.124038	0.0312757	0.143624	1	0.10332	1	0.244403	1.89247e-06	0.103063	1	-0.0102309	1	0.381262	1	0.20101	1	0.111467	1	0.0095472	1	0.090892	1	-0.348829	1	0.000164186	0.208073	1	0.111965	1	-0.00544738	0.104863	0.275412	FALSE
Rere	0.115587	1	0.0868989	1	0.0372899	1	0.12655	4.00924e-07	0.0899509	1	0.0686665	1	0.214027	2.39714e-11	0.0867534	1	0.188179	1	0.131724	1	-0.0412906	1	0.258862	1	0.116431	1	0.0729358	1	0.0203597	1	1.04811e-12	0.140864	1	0.0590497	1	0.114671	0.104862	0.140103	FALSE
Fam114a2	0.0505005	1	0.0368743	1	0.0526981	1	0.0670903	1	0.127238	1	0.131244	1	0.0806034	1	0.07254	1	0.134846	1	-0.0704629	1	-0.0346571	1	0.0724779	1	0.309645	1	0.362999	1	0.176258	1	1	0.0874753	1	0.112999	1	0.113505	0.10466	0.0915307	FALSE
Cggbp1	0.0610146	1	0.0445539	1	0.0842034	1	0.00467784	1	0.0289735	1	0.062636	1	0.0569721	1	0.0514102	1	0.133491	1	0.162924	1	0.175267	1	0.0319698	1	0.182466	1	0.183999	1	0.30323	1	1	0.0936109	1	0.0968408	1	0.123106	0.104519	-0.0895856	FALSE
Nt5e	-0.0475985	1	-0.101696	1	-0.0508311	1	0.0169884	1	0.0626668	1	0.052889	1	0.0192402	1	0.0977727	1	-0.0404354	1	0.553124	1	0.240731	1	0.152394	1	0.251894	1	0.187933	1	0.166331	1	1	0.15873	1	0.0974816	1	0.0560694	0.104094	0.0227196	FALSE
Insig2	0.101522	1	0.0472861	1	0.179209	1	0.0611743	1	0.0943146	1	0.0758619	1	0.114681	0.0648248	0.118074	0.000645835	0.113449	1	0.00831462	1	0.0898597	1	0.0105885	1	0.146691	1	0.237285	1	0.161584	1	0.857494	0.0864766	0.143782	0.117364	1	0.108138	0.103993	0.0840264	FALSE
Col6a1	-0.0111394	1	-0.17897	1	0.108944	1	0.129287	1	0.257401	1	-0.111932	1	0.130831	1	0.36233	0.652282	-0.0583181	1	0.2394	1	0.671135	1	-0.0419235	1	0.313142	1	-0.0647589	1	-0.19314	1	1	0.160304	0.999917	0.209428	1	-0.0592739	0.103486	0.109555	FALSE
Hsp90ab1	0.0749675	1	0.333275	1.89132e-33	0.0769937	1	0.045726	1	0.0435802	1	0.0278308	1	0.106621	0.00122542	0.0182887	1	0.105697	2.38307e-05	0.136791	1	0.217185	1	0.298785	0.000676631	0.0278294	1	0.0350172	1	0.00363769	1	0.201697	0.0783871	2.6804e-27	0.129469	8.8064e-05	0.102589	0.103482	0.191372	FALSE
Dst	0.167575	1	0.21979	2.84289e-05	0.168245	1	0.130479	0.00231603	0.0479164	1	0.1184	1	0.0896953	1	-0.0126291	1	-0.0109264	1	0.263436	1	-0.035709	1	0.105224	1	0.199964	1	0.150104	1	-0.0518087	1	0.276071	0.17023	0.0215428	0.0738946	1	0.0658269	0.103317	0.110635	FALSE
Atrx	0.0497578	1	0.151018	1	0.116081	1	0.0608413	1	0.087582	1	0.0545823	1	0.0809381	1	0.0666343	1	0.021831	1	0.441297	1	0.207066	1	-0.00100035	1	0.0784712	1	0.100535	1	0.0313898	1	1	0.142261	1	0.122567	1	0.0445768	0.103135	0.147393	FALSE
Serf1	-0.151437	1	0.0125522	1	-0.0406445	1	0.113026	0.0177657	0.182847	0.0579981	0.160995	1	0.118681	0.453543	0.228151	6.00437e-12	0.104817	1	0.171491	1	0.0726381	1	0.0324529	1	0.0748991	1	0.28982	1	0.171222	1	0.472416	0.0653319	1.13489e-08	0.157202	1	0.0857686	0.102767	0.0584115	FALSE
Bbx	0.0861607	1	0.0373623	1	0.00303539	1	0.097093	1	0.0779788	1	0.044037	1	0.122768	0.207865	0.0726512	1	0.0446309	1	-0.0419215	1	0.254813	1	0.0786327	1	0.295283	1	0.17962	1	0.188548	1	0.977889	0.111877	1	0.124485	1	0.0717769	0.102713	0.0582265	FALSE
mt-Nd3	-0.00776742	1	0.276195	3.67846e-12	0.263684	0.00117026	0.0630708	1	0.0591177	1	0.207627	1	-0.0766669	1	0.0489675	1	0.214478	0.0175017	-0.00896241	1	0.0610864	1	0.312719	1	0.145214	1	0.144282	1	-0.162817	1	1	0.0229776	8.62126e-08	0.11793	0.0173237	0.167138	0.102682	-0.195048	FALSE
Hes1	0.0979901	1	0.0239487	1	-0.00303634	1	0.274116	0.000336781	0.115403	1	-0.206418	1	0.322762	8.47869e-05	0.243026	1	-0.114401	1	0.230198	1	0.666799	1	-0.0624265	1	0.202518	1	-0.107272	1	-0.143963	1	0.000138126	0.225517	1	0.188381	1	-0.106049	0.102616	0.392259	FALSE
Tnrc6a	0.140112	1	0.0309429	1	0.0944475	1	0.077703	0.473335	0.00176978	1	0.0250121	1	0.0669773	1	0.038358	1	0.0989615	1	0.123522	1	0.235736	1	0.116192	1	0.144743	1	0.085049	1	0.25658	1	0.998948	0.110612	1	0.0783711	1	0.118239	0.102407	0.0159379	FALSE
Ehmt2	0.118407	1	0.11835	0.0898873	0.0176854	1	0.0951563	0.000111941	0.0942131	1	0.0293315	1	0.0684038	1	0.0748539	1	0.114739	1	0.165788	1	0.30718	1	0.102764	1	0.135729	1	0.135594	1	-0.044838	1	0.0517609	0.116697	0.902974	0.146038	1	0.0439365	0.102224	0.083877	FALSE
Lrrcc1	0.0973176	1	0.060744	1	0.0756322	1	0.121099	7.7858e-07	0.0154107	1	0.0765407	1	0.102903	0.0204847	0.052615	1	0.0689892	1	0.202087	1	0.117574	1	0.0479705	1	0.227094	1	0.0647927	1	0.201157	1	8.73047e-05	0.1501	1	0.0622273	1	0.094058	0.102129	0.103417	FALSE
Rps20	0.110302	1	0.228112	1.26252e-17	0.227272	6.85793e-08	0.0318798	1	0.0967936	0.955122	0.185755	2.36111e-07	0.0878463	0.0704054	0.140465	1.27367e-13	0.131595	1.38518e-10	-0.0674795	1	-0.213805	1	0.0544868	1	-0.0102203	1	0.210781	1	0.317316	1	0.869752	0.0304657	1.50777e-24	0.0924692	8.85543e-19	0.183285	0.102073	-0.122537	FALSE
Canx	0.226913	0.954456	0.199579	0.000703225	0.0778785	1	0.128201	0.144685	0.0215731	1	0.0203326	1	0.101227	1	0.0369036	1	0.0270128	1	0.478933	1	-0.175115	1	-0.0299358	1	0.250371	1	0.143561	1	0.0224278	1	0.94915	0.237129	0.15058	0.0453004	1	0.0235432	0.101991	0.0635457	FALSE
Sfxn1	0.207359	0.353052	0.0281488	1	0.092464	1	0.133723	0.0023148	0.0875236	1	0.118761	1	0.180843	7.93718e-05	-0.0219056	1	-0.0111774	1	0.232803	1	0.167597	1	0.155009	1	0.153611	1	0.195566	1	-0.191332	1	0.000261853	0.181668	1	0.091386	1	0.0327449	0.101933	0.216398	FALSE
Tor1aip2	0.0157396	1	0.040753	1	0.0834579	1	0.00143276	1	0.110242	1	0.136003	1	0.00452394	1	0.10295	0.923347	0.0801734	1	0.116133	1	0.142978	1	0.274983	1	0.0201856	1	0.144636	1	0.253469	1	1	0.0316031	1	0.108312	1	0.165617	0.101844	0.0567442	FALSE
Apbb2	0.0397319	1	0.0492594	1	0.0403444	1	0.0600219	1	0.0714552	1	0.0925748	1	0.0386825	1	0.0741583	1	0.077911	1	0.00204015	1	0.225817	1	-0.0240048	1	0.136185	1	0.365019	1	0.275951	1	1	0.0553323	1	0.157142	1	0.0925553	0.101676	0.0187072	FALSE
Capg	0.0707009	1	-0.159397	1	0.0368216	1	0.0644687	1	0.105913	1	0.05166	1	0.140302	0.659736	0.134947	0.03641	-0.035732	1	0.567254	0.0363287	0.680346	0.0439343	0.168431	1	0.0394921	1	-0.0856891	1	-0.256098	1	0.681215	0.176444	0.230691	0.135224	1	-0.00698349	0.101561	0.304055	FALSE
Cdyl	0.151329	1	0.0868065	0.493007	0.0562571	1	0.0889446	0.0160801	0.109442	1	0.0508764	1	0.131143	0.0019574	0.0653803	1	0.0994005	1	0.197768	1	0.0917851	1	0.148846	1	0.224571	1	0.0278632	1	-0.00963809	1	0.0230372	0.158751	0.999178	0.0762555	1	0.0691483	0.101385	0.0354594	FALSE
Atp11b	0.0431048	1	0.104934	1	0.138324	1	0.0523369	1	0.127674	1	0.0712411	1	0.0323449	1	0.0622312	1	0.0697481	1	0.110976	1	0.0676232	1	1.08564e-05	1	0.236559	1	0.201781	1	0.201594	1	1	0.0950645	1	0.112849	1	0.0961837	0.101366	0.0473965	FALSE
Trim33	0.0625314	1	0.103768	0.661083	0.190155	1	0.0856289	1	0.142833	1	0.108759	1	0.0436483	1	0.0835347	1	0.0922147	1	0.179543	1	-0.00616145	1	0.0668273	1	0.057461	1	0.116269	1	0.191465	1	1	0.0857625	0.999928	0.0880487	1	0.129884	0.101232	0.0866981	FALSE
Wipi1	0.136744	1	0.0703603	1	0.0511543	1	0.203811	1.68997e-11	0.0590603	1	0.0588286	1	0.176714	2.07855e-06	0.0789549	1	0.0400876	1	0.141609	1	0.271794	1	-0.00974421	1	0.347722	0.0804364	0.042644	1	-0.151406	1	3.47361e-13	0.20132	1	0.104563	1	-0.00221594	0.101222	0.146098	FALSE
Tnrc6c	0.0377958	1	0.0838987	1	0.0531794	1	0.0905719	0.125802	0.0829602	1	0.0161216	1	0.109331	0.756219	0.0352689	1	0.151172	1	0.214929	1	0.171411	1	-0.0470824	1	0.0962783	1	0.212656	1	0.209504	1	0.909997	0.109781	1	0.117239	1	0.0765789	0.1012	0.0434984	FALSE
Msantd4	0.124958	1	0.0927835	1	0.107794	1	0.0748679	0.234774	0.0994593	1	0.106504	1	0.123673	0.410818	0.065969	1	0.0818187	1	0.25596	1	0.120944	1	0.156973	1	0.0357597	1	0.0681479	1	0.000680175	1	0.911656	0.123044	1	0.0894608	1	0.090754	0.101086	0.0631548	FALSE
Pabpc1	0.137735	1	0.189686	9.06969e-05	0.178858	1	0.0601462	1	0.1013	1	0.131333	1	0.014604	1	-0.0364044	1	-0.00546903	1	0.196393	1	0.0161392	1	0.165253	1	0.148533	1	-0.0207009	1	0.238153	1	1	0.111482	0.0454204	0.0500041	1	0.141626	0.101037	0.131593	FALSE
Rnf216	0.113273	1	0.134765	0.0855118	0.0704042	1	0.0783541	0.816881	0.140018	1	-0.0162074	1	0.0948219	0.986129	0.111801	0.59553	0.156823	1	0.204725	1	0.208364	1	0.20082	1	0.0404439	1	0.0835828	1	-0.106521	1	0.999997	0.106323	0.819046	0.135706	1	0.0610638	0.101031	0.108366	FALSE
Sf3b3	0.0615243	1	0.184906	3.54363e-05	0.087619	1	0.0796909	1	0.0437497	1	0.131492	1	0.0508289	1	0.00580529	1	0.147834	1	0.195339	1	-0.0167862	1	0.0502567	1	0.105497	1	0.146025	1	0.241301	1	1	0.0985761	0.0248991	0.0727398	1	0.131701	0.101006	0.108	FALSE
Traf1	0.0906731	1	0.0846428	1	0.0630219	1	0.0563148	1	0.0636781	1	0.0808435	1	0.0955943	1	0.136761	0.000380763	0.104731	1	0.180787	1	0.116313	1	0.0325226	1	0.162905	1	0.232421	1	0.0086917	1	1	0.117255	0.107118	0.126763	1	0.0579621	0.10066	0.0489217	FALSE
Tbl1x	0.0220925	1	0.122724	0.207387	0.109469	1	0.0573557	1	0.064574	1	0.0654099	1	0.140496	0.0176319	0.0459688	1	-0.0059667	1	0.295913	1	0.264498	1	0.14095	1	0.187993	1	0.00714854	1	-0.00884987	1	0.621404	0.14077	0.977767	0.100983	1	0.0602023	0.100652	0.129866	FALSE
Arhgap5	0.148645	1	0.196466	4.10613e-05	0.152791	1	0.121177	0.0021443	0.0684224	1	0.128683	1	0.0512923	1	0.141025	0.00416555	0.141453	1	-0.134077	1	0.124749	1	0.109765	1	-0.0986529	1	0.0866642	1	0.270613	1	0.266124	0.017677	0.0005515	0.123465	1	0.160661	0.100601	0.13529	FALSE
Rab14	0.0299654	1	0.143145	0.0362334	-0.0592001	1	0.0994699	0.245177	0.026048	1	-0.00411621	1	0.101829	1	0.0513677	1	0.0286789	1	0.233107	1	0.0776294	1	0.0681173	1	0.492839	0.000154671	0.103391	1	0.113781	1	0.0260261	0.191442	0.759345	0.0803162	1	0.0294523	0.100403	0.149373	FALSE
Ibsp	0.134684	1	-0.91652	1	-0.22163	1	-0.0330655	1	0.704156	1.8776e-05	-0.276929	1	0.0831565	1	0.478601	7.49457e-06	-0.199441	1	-0.247101	1	1.10071	1	-0.47702	1	1.31118	1	0.25399	1	-0.192549	1	1	0.249771	1.86582e-06	0.324188	1	-0.273514	0.100148	-0.0445383	FALSE
Rad50	0.205667	0.768766	0.0567428	1	0.140033	1	0.135438	0.00274086	0.056143	1	0.137383	1	0.088102	1	-0.0146789	1	0.0790384	1	0.238077	1	0.0725918	1	0.0301029	1	0.18931	1	-0.0118408	1	0.0997163	1	0.2639	0.171319	1	0.0317916	1	0.0972547	0.100122	0.117063	FALSE
Peak1	0.0969692	1	0.109011	0.110888	0.00223572	1	0.191586	2.73348e-10	0.144906	1	0.0750985	1	0.127685	9.86228e-05	0.0786129	0.284599	0.0257436	1	0.0129991	1	0.0815258	1	0.0748924	1	0.270942	1	0.0598299	1	0.143818	1	1.22154e-09	0.140036	0.733742	0.0947772	1	0.0643577	0.0997237	0.132342	FALSE
Wls	0.157764	1	0.318208	0.000115027	-0.00834699	1	0.135644	0.043089	0.154261	1	-0.0182976	1	0.157375	0.284238	0.138294	0.360682	-0.061275	1	0.0528249	1	-0.0129177	1	-0.10987	1	0.35384	1	0.181553	1	0.0566719	1	0.550717	0.17149	0.0275936	0.15588	1	-0.0282236	0.0997153	0.147217	FALSE
Zcchc6	0.106076	1	0.0869222	1	0.0632861	1	0.0641776	1	0.124657	1	0.168857	1	0.173071	8.0408e-06	0.130496	0.0320728	0.0708258	1	0.0815263	1	0.121137	1	-0.00408362	1	0.0722211	1	0.194695	1	0.0401243	1	0.00916402	0.0994144	0.73677	0.131582	1	0.0678019	0.0995993	0.0857911	FALSE
Tmem60	0.0173333	1	0.064478	1	0.0488594	1	0.0944849	0.000945967	0.12155	0.186138	0.159771	1	0.127251	0.00990978	0.160617	8.12435e-11	0.150168	1	-0.0654171	1	0.0766056	1	-0.0171212	1	0.162527	1	0.135807	1	0.256062	1	0.0101884	0.0672358	2.86864e-07	0.111811	1	0.119548	0.0995318	0.0616996	FALSE
Stat1	-0.0193053	1	-0.161225	0.025732	0.30713	1	0.0201067	1	0.0333595	1	0.301325	0.546388	0.0666079	1	-0.00509281	1	0.336225	1.92543e-07	-0.305027	1	0.157846	1	0.200419	1	0.172361	1	0.177301	1	0.20817	1	1	-0.0130514	0.694925	0.0404378	0.000380248	0.270654	0.0993468	0.140105	FALSE
Kcnq1ot1	0.132976	1	0.257325	2.2159e-05	0.134825	1	0.0241555	1	0.0534689	1	-0.011462	1	0.0995621	1	0.0986164	1	0.164436	1	0.179614	1	0.264747	1	0.186631	1	0.0711202	1	-0.120252	1	-0.0466244	1	1	0.101486	0.0182592	0.110781	1	0.0855611	0.0992759	0.246881	FALSE
Dnm1l	0.0830111	1	0.0573701	1	0.0677447	1	0.077012	0.260743	0.0528573	1	0.0537478	1	0.107584	1	0.0879667	1	0.0898269	1	0.165136	1	0.152274	1	0.0145783	1	0.21199	1	0.104108	1	0.163486	1	0.987836	0.128947	1	0.0909152	1	0.0778767	0.0992461	0.0067964	FALSE
Ccng2	0.077852	1	0.0662341	1	0.0474617	1	0.0436588	1	0.178312	1	0.112272	1	0.0448722	1	0.112583	1	0.167051	1	-0.232765	1	-0.0308679	1	0.0201138	1	0.190837	1	0.428327	1	0.260899	1	1	0.024891	1	0.150918	1	0.12156	0.0991227	-0.0304362	FALSE
Chchd10	0.264556	2.47105e-08	0.205207	3.2961e-12	0.295249	8.56817e-05	0.109888	9.12274e-12	0.0778125	0.445064	0.149323	0.332206	0.0618663	1	0.0565569	1	0.102213	1	-0.0535766	1	-0.076128	1	0.14301	1	0.0261867	1	0.0773943	1	0.0444299	1	3.51138e-14	0.081784	3.92251e-08	0.0681685	0.0215604	0.146845	0.0989325	0.115537	FALSE
Pdgfrb	0.0674673	1	0.0141137	1	-0.0220463	1	0.10924	0.506684	0.16117	0.0781484	0.0666237	1	0.115234	0.0723196	0.216497	6.05721e-10	0.00340959	1	0.108255	1	0.0905042	1	-0.00235766	1	0.197985	1	0.349269	1	0.00786613	1	0.7614	0.119636	7.50602e-07	0.166311	1	0.0106991	0.098882	0.106968	FALSE
Prr13	0.0132793	1	-0.0615427	1	0.029467	1	0.145199	0.000458124	0.159099	1	0.0950389	1	0.0912936	1	0.0435395	1	-0.0999493	1	0.250561	1	0.367835	1	0.129194	1	0.192912	1	0.100852	1	0.0222453	1	0.118918	0.138649	1	0.121957	1	0.0351991	0.0986016	0.146006	FALSE
Cep350	0.0815621	1	0.0190584	1	0.087891	1	0.0857691	0.00130646	0.0937334	1	0.0721047	1	0.105705	1	0.0348364	1	0.0330334	1	-0.0315963	1	0.159877	1	0.169392	1	0.26485	1	0.110341	1	0.19203	1	0.208389	0.101258	1	0.0835693	1	0.11089	0.0985725	0.0586903	FALSE
Foxs1	-0.00632809	1	-0.0383382	1	0.0168087	1	0.104199	0.000298915	0.26549	1.16055e-06	0.0489846	1	0.0495708	1	0.131878	6.33382e-08	0.0245448	1	0.0628438	1	0.38234	0.00547936	0.115626	1	0.142274	1	0.106559	1	0.0689571	1	0.093216	0.0705119	2.97565e-11	0.169586	1	0.0549842	0.0983606	0.146612	FALSE
Lrrk1	0.0997189	1	0.00883848	1	0.0114305	1	0.0943146	7.73324e-05	0.084873	1	0.0267917	1	0.162142	4.74008e-05	0.0928766	1	0.121461	1	0.190958	1	0.0553208	1	-0.0959276	1	0.109596	1	0.247414	1	0.264526	1	2.69866e-05	0.131346	1	0.0978646	1	0.0656564	0.098289	0.0887081	FALSE
Atxn7l3b	0.0110241	1	0.00473012	1	-0.0817541	1	0.0890971	1	0.0402299	1	0.0857196	1	0.102919	1	0.0787298	1	0.0865951	1	0.0680021	1	0.376735	1	0.171479	1	0.249196	1	0.0828151	1	0.106693	1	1	0.104048	1	0.116648	1	0.0737467	0.0981475	0.232245	FALSE
Tomm70a	0.135035	1	0.065675	1	0.13441	1	0.0863194	1	0.02453	1	0.025607	1	0.0544992	1	-0.000154475	1	0.0890494	1	0.258284	1	0.12172	1	0.0770906	1	0.161279	1	0.03469	1	0.199683	1	1	0.139083	1	0.049292	1	0.105168	0.0978477	0.10806	FALSE
Pam	0.047789	1	-0.0516567	1	0.0894716	1	0.0992357	0.000638832	0.059902	1	-0.0253046	1	0.155993	0.000920411	0.0190522	1	0.0421326	1	0.140552	1	0.210442	1	0.216135	1	0.13195	1	0.181735	1	0.149728	1	0.00139679	0.115104	1	0.0838949	1	0.0944327	0.0978105	0.0922657	FALSE
Trip11	0.116604	1	0.0383004	1	0.118124	1	0.0853786	1	0.106304	1	-0.00849549	1	0.102258	0.199175	0.0975157	0.147444	0.136526	1	0.310859	1	0.325913	1	0.21329	1	-0.100198	1	-0.0111404	1	-0.0650326	1	0.975562	0.10298	0.954747	0.111379	1	0.0788823	0.0977471	0.16067	FALSE
Tm9sf3	0.16909	1	0.160386	0.173968	0.127646	1	0.0919603	1	0.0809424	1	-0.0272255	1	0.157793	0.0250398	0.0537987	1	0.0208228	1	0.254579	1	0.263471	1	-0.0370305	1	0.130871	1	0.0431236	1	-0.025687	1	0.689672	0.160859	0.967174	0.120344	1	0.0117051	0.097636	0.0428053	FALSE
Rest	0.107337	1	0.147362	0.0122317	0.0998112	1	0.077044	1	0.130671	1	0.0546923	1	0.00287253	1	0.0881378	1	0.123922	1	-0.0493701	1	0.0988627	1	0.01585	1	0.142197	1	0.190519	1	0.23395	1	1	0.056016	0.550471	0.13111	1	0.105645	0.0975906	0.0771329	FALSE
Irf2	-0.0279654	1	0.00632229	1	0.0401223	1	0.0873832	0.0812334	0.126297	1	0.0512419	1	0.136743	0.353334	0.0830498	1	0.111327	1	0.0294472	1	0.263051	1	0.151249	1	0.255145	1	0.0948163	1	0.0551218	1	0.715826	0.0961504	1	0.114707	1	0.0818124	0.0975567	0.0990156	FALSE
Cars	0.121631	1	0.150484	0.0011607	0.162514	1	0.0320415	1	0.0468201	1	0.199919	1	0.0440945	1	0.0786508	1	0.141974	1	0.318891	1	0.0479056	1	0.0987106	1	-0.0467637	1	0.0510271	1	0.0131853	1	1	0.093979	0.19616	0.0749776	1	0.123261	0.0974057	0.0642679	FALSE
Mtss1	0.193649	1	0.0098628	1	0.000376365	1	0.135687	0.398921	0.136976	1	-0.068202	1	0.167385	0.00297599	0.0960753	1	0.0605644	1	-0.0559221	1	0.140772	1	0.140232	1	0.301561	1	0.164778	1	0.0361751	1	0.198448	0.148472	1	0.109693	1	0.0338292	0.0973314	0.210787	FALSE
Arhgef5	0.108859	1	0.0133007	1	0.0853903	1	0.0727207	0.324178	-0.00160474	1	0.0673196	1	0.105855	0.0500065	0.0601928	1	0.144828	1	0.221446	1	0.258564	1	0.122739	1	0.0652258	1	0.107343	1	0.0264225	1	0.605004	0.114821	1	0.0875593	1	0.0893399	0.0972402	0.109583	FALSE
Camk1	0.0669072	1	0.0865754	1	0.0125002	1	0.0464448	1	0.0575502	1	0.0738823	1	0.0599176	1	0.0606834	1	0.010149	1	0.234708	1	0.108796	1	-0.0209491	1	0.183082	1	0.266092	1	0.210572	1	1	0.118212	1	0.115939	1	0.0572309	0.0971274	0.13517	FALSE
Plec	0.111667	1	-0.145595	1	-0.119079	1	0.229479	5.12242e-08	0.000465292	1	-0.016452	1	0.20716	0.000194804	-0.016863	1	-0.0342678	1	0.524293	1	0.311631	1	0.265444	1	0.183601	1	-0.061547	1	0.0159064	1	2.0167e-07	0.25124	1	0.0176183	1	0.0223103	0.0970562	0.278538	FALSE
Rab2a	0.114165	1	-0.0328018	1	0.142955	1	0.039281	1	0.0242765	1	0.046815	1	0.180133	1.44609e-07	0.109001	0.225894	-0.00781411	1	0.257037	1	-0.00956747	1	0.0723462	1	0.145093	1	0.243272	1	0.131325	1	0.000485206	0.147142	0.981998	0.0668359	1	0.0771255	0.0970344	0.129424	FALSE
Copa	0.243572	0.0585368	0.091764	1	0.238661	1	0.0736851	0.604355	-0.0326802	1	0.0313992	1	0.045963	1	0.00283139	1	0.011242	1	0.24261	1	0.228312	1	0.0871216	1	0.149716	1	0.0516932	1	-0.0111992	1	0.754959	0.151109	1	0.0683841	1	0.0714448	0.0969794	0.0926079	FALSE
Hip1	0.244211	2.16876e-06	0.108543	0.0593806	0.164792	1	0.122812	1.22399e-06	0.0754188	1	0.0463252	1	0.117721	0.020995	0.0611618	1	-0.00328273	1	-0.000623981	1	0.15471	1	0.00651878	1	0.128499	1	0.0735014	1	0.151408	1	2.30605e-09	0.122524	0.843953	0.0946669	1	0.0731523	0.096781	0.096424	FALSE
Pold4	0.129643	1	-0.0783361	1	0.0761916	1	0.092592	1	0.0170905	1	-0.0131274	1	0.239282	4.11215e-10	0.131867	0.000304589	0.013276	1	0.0922717	1	0.213274	1	-0.261191	1	0.347217	1	0.198071	1	0.253191	1	4.53507e-06	0.180201	0.0942367	0.0963932	1	0.013668	0.0967541	0.0960002	FALSE
Lpp	0.0622415	1	0.173028	0.00483253	0.0347734	1	0.0332148	1	0.0520802	1	-0.00546888	1	0.0617347	1	0.0838011	1	0.040108	1	0.260142	1	0.209438	1	0.00660353	1	0.121662	1	0.0934998	1	0.223586	1	1	0.107799	0.384225	0.122369	1	0.0599205	0.0966963	0.08319	FALSE
Smc6	0.0656284	1	0.158558	0.00245862	0.111065	1	0.12952	0.0286436	0.197048	0.00884825	0.145524	1	0.0918222	1	0.0894824	1	0.0775271	1	0.012798	1	0.04624	1	0.183494	1	0.0521179	1	0.0397811	1	0.0494337	1	0.715435	0.0703773	0.0180361	0.106222	1	0.113409	0.0966693	0.128458	FALSE
Cd2ap	0.131194	1	0.175766	5.83742e-05	0.139948	1	0.104928	0.00287028	0.055532	1	0.0351965	1	0.104876	0.297119	0.0344213	1	0.0374277	1	0.0342124	1	0.177418	1	0.24625	1	-0.0136593	1	0.127535	1	0.0589578	1	0.16697	0.0723101	0.0343827	0.114135	1	0.103556	0.0966669	0.107701	FALSE
Srek1ip1	0.132275	1	0.0531526	1	0.10802	1	0.0912547	0.0557837	0.0666877	1	0.0709658	1	0.13883	0.00186473	0.0885266	0.119667	0.0895815	1	0.143623	1	0.0684785	1	0.191882	1	0.131687	1	0.154625	1	-0.0800946	1	0.0494642	0.127534	0.935564	0.0862941	1	0.0760709	0.096633	0.0218668	FALSE
Slc25a24	0.108619	1	-0.00866734	1	0.108901	1	0.102131	0.498574	0.0429522	1	0.0748517	1	0.000933938	1	-0.0460642	1	0.0632148	1	0.119139	1	0.136919	1	0.177611	1	0.161359	1	0.124925	1	0.282197	1	0.999234	0.0984362	1	0.0500129	1	0.141355	0.0966014	0.043318	FALSE
AC160336.1	0.0286751	1	0.650665	1.16517e-15	0.258855	0.00737691	0.0277858	1	0.350717	2.67978e-05	0.497331	2.99272e-06	-0.0523728	1	0.166301	6.06969e-10	0.502489	1.94439e-12	-0.447082	1	-0.706929	1	-0.0464072	1	-0.62319	1	0.666208	1	0.174838	1	1	-0.213237	1.60637e-23	0.225393	7.75288e-15	0.277421	0.0965257	-0.228433	FALSE
Ing5	0.0693586	1	0.0321632	1	0.0872607	1	0.0635279	1	0.0629428	1	0.122161	1	0.0853742	1	0.022123	1	0.067376	1	0.100942	1	0.0193951	1	0.216403	1	0.136124	1	0.0656686	1	0.29662	1	1	0.0910653	1	0.0404586	1	0.157964	0.096496	0.0816389	FALSE
Sec61a1	0.142558	1	0.0853788	1	0.134147	1	0.0196166	1	0.0934542	1	0.0369773	1	0.0487943	1	0.0383591	1	0.0243596	1	0.223302	1	-0.0644191	1	0.26784	1	0.144123	1	0.0370542	1	0.215785	1	1	0.115679	1	0.0379654	1	0.135822	0.0964887	0.0153045	FALSE
Prpf8	0.138308	1	0.189075	3.90799e-06	0.168775	1	0.0827187	1	0.0383	1	0.0210164	1	0.00987394	1	-0.0019309	1	0.100145	1	0.176049	1	0.241159	1	0.220383	1	0.0837565	1	0.0155474	1	-0.0374824	1	1	0.0981411	0.00552856	0.0964302	1	0.0945675	0.0963796	0.0684021	FALSE
Runx3	0.117196	1	0.0208028	1	0.0424818	1	0.106135	0.177262	0.0957324	1	0.0767484	1	0.116886	0.00715465	0.127239	0.0263314	0.101185	1	0.204856	1	0.0359619	1	0.0944971	1	0.146371	1	0.0957302	1	0.0634637	1	0.205266	0.138289	0.69935	0.0750932	1	0.0756753	0.0963524	0.072877	FALSE
Maml3	0.0795226	1	0.134906	0.00041451	0.107049	1	0.117041	4.72789e-06	0.0672674	1	0.056814	1	0.107138	1	0.0616193	1	0.0264457	1	0.104545	1	0.128595	1	0.00377886	1	0.325374	1	0.0943945	1	0.0304375	1	0.00632447	0.146724	0.112404	0.0973565	1	0.0449049	0.0963285	0.0756787	FALSE
Erlec1	0.143174	1	0.0973959	1	0.110281	1	0.114121	0.00298925	0.0343641	1	0.0174136	1	0.229735	1.4202e-10	0.0993989	0.0397529	0.0660943	1	0.0988221	1	0.0936405	1	0.00928331	1	0.344419	1	0.0163093	1	-0.0300951	1	1.34708e-08	0.186054	0.776134	0.0682218	1	0.0345955	0.0962905	0.143059	FALSE
Nrip1	0.0490302	1	0.151969	0.0162439	0.124377	1	0.0369393	1	0.0977248	1	0.0261678	1	0.0851113	1	0.100167	0.39314	0.114599	1	0.260703	1	0.20551	1	0.0520499	1	0.0749038	1	0.0380773	1	0.0264704	1	1	0.101337	0.431134	0.11869	1	0.0687328	0.0962533	0.0219526	FALSE
Rtn4	-0.0179626	1	-0.0641618	1	-0.0452949	1	0.0427761	1	0.0626862	1	0.0931806	1	0.119108	1	0.137383	0.0223262	0.0159198	1	0.216798	1	0.138054	1	0.0506857	1	0.168338	1	0.352273	1	0.17312	1	1	0.105812	0.667456	0.125247	1	0.0575223	0.0961936	0.0439021	FALSE
Htt	0.0688628	1	0.120162	0.00536227	0.125075	1	0.0563663	0.42929	0.0743071	1	0.0412875	1	0.130617	0.122461	0.0583296	1	0.0966991	1	0.110946	1	0.11498	1	0.0454314	1	0.044897	1	0.115577	1	0.236213	1	0.824322	0.0823378	0.401376	0.096671	1	0.108941	0.0959833	0.058133	FALSE
Vgll4	0.138116	1	0.0671307	1	0.104056	1	0.0622132	1	-0.00367257	1	0.0471608	1	0.128897	0.486776	0.0610337	1	0.102568	1	0.0418972	1	0.143434	1	-0.0881252	1	0.192731	1	0.172339	1	0.265352	1	0.999111	0.112771	1	0.0880531	1	0.0862024	0.0956754	0.13539	FALSE
Pdap1	0.293764	0.000844469	0.0448295	1	0.198754	0.051707	0.0864689	1	0.00211533	1	0.114212	1	0.0785064	1	-0.0329923	1	0.164968	0.00262397	-0.116328	1	0.0624142	1	0.340923	1	0.0587024	1	-0.0341257	1	0.171182	1	0.1661	0.0802226	1	0.00844821	0.0582463	0.198008	0.0955595	-0.0292617	FALSE
Ddr2	0.152151	1	0.16092	0.00144916	0.0888633	1	0.0553789	1	0.0618243	1	-0.00655435	1	0.0872325	0.632199	0.0832821	1	0.0394161	1	0.149309	1	0.259185	1	-0.00891586	1	0.18032	1	0.0779691	1	0.0499621	1	0.999884	0.124878	0.219589	0.128636	1	0.0325542	0.0953562	0.12245	FALSE
Cbx1	0.144607	1	0.102554	1	0.140162	1	0.113395	0.0955118	0.174336	0.169562	0.125861	1	0.0645209	1	0.098226	0.469102	0.0872345	1	0.141691	1	0.13999	1	0.136489	1	-0.0421142	1	0.102317	1	-0.099782	1	0.910478	0.0844198	0.886934	0.123485	1	0.0779927	0.095299	0.105713	FALSE
Dnajc10	0.170677	1	0.218305	1.95703e-07	0.0231083	1	0.0966511	0.0751742	0.0467577	1	0.0208451	1	0.0747361	1	0.128485	0.00143066	0.094359	1	0.177212	1	0.0274618	1	0.0832342	1	0.101705	1	0.00856156	1	0.15562	1	0.879123	0.124196	3.30178e-06	0.0859142	1	0.0754333	0.0951813	0.108575	FALSE
Hexa	0.0436152	1	0.0556253	1	0.0610985	1	0.0547141	1	0.0635718	1	-0.00137289	1	0.06315	1	0.0993586	0.12529	-0.00129465	1	0.188674	1	0.325686	1	0.0275414	1	0.207855	1	0.137432	1	0.100628	1	1	0.111602	0.940121	0.136335	1	0.03732	0.0950855	0.0869623	FALSE
Hmgxb4	0.0864435	1	0.0948359	0.222715	0.0604241	1	0.0858188	0.0171928	0.0863938	1	0.0358301	1	0.121842	0.00818104	0.104322	0.00200206	0.100028	1	0.0204931	1	0.0332197	1	0.234436	1	0.220701	1	0.0497228	1	0.091593	1	0.05954	0.10706	0.117125	0.0736989	1	0.104462	0.0950736	0.0890462	FALSE
Arpc5	0.14475	1	-0.045823	1	0.174411	1	0.0693472	1	0.0782902	1	0.0490918	1	0.192583	1.25964e-07	0.137766	0.0027221	0.0188075	1	0.217697	1	0.124601	1	0.0955518	1	0.0552115	1	0.107985	1	0.00501678	1	0.000436585	0.135918	0.297787	0.0805638	1	0.0685757	0.095019	0.16027	FALSE
Fndc3a	0.161987	1	-0.0163974	1	0.198861	1	0.150179	0.000766159	0.110332	1	0.162793	1	0.133209	0.220994	0.0580004	1	0.0446205	1	-0.0938841	1	0.0866941	1	0.0492451	1	0.154313	1	0.111444	1	0.110387	1	0.0666178	0.101161	1	0.0700145	1	0.113181	0.0947855	0.0641122	FALSE
Eif2s2	0.088259	1	0.311067	3.65382e-10	0.117912	1	0.00217966	1	0.0585213	1	0.10046	1	-0.0338165	1	0.0214474	1	0.131678	1	0.154515	1	-0.0220759	1	0.374457	0.218175	-0.0436262	1	-0.0351683	1	0.193394	1	1	0.0335022	4.11397e-06	0.0667584	0.980347	0.18358	0.0946136	-0.0241641	FALSE
2810004N23Rik	0.056895	1	-0.0229698	1	0.083095	1	0.0670346	1	0.129366	1	0.177479	1	0.114033	1	0.0799424	1	0.174097	0.409273	-0.0661199	1	0.0154762	1	0.213012	1	0.00867726	1	0.0933649	1	0.29442	1	1	0.036104	1	0.0590359	0.997729	0.188421	0.0945201	0.0415468	FALSE
Taf12	0.13974	1	0.292505	2.82675e-12	0.0591199	1	0.0392158	1	0.167039	0.558611	-0.0718011	1	0.0370547	1	0.175718	8.25049e-07	0.045413	1	0.273049	1	0.00608541	1	0.0379182	1	0.0752484	1	0.273123	1	-0.140093	1	1	0.112862	1.72458e-13	0.182894	1	-0.0138887	0.0939557	0.00789157	FALSE
Sec62	-0.0475219	1	-0.0225456	1	0.087887	1	0.113736	0.0222808	0.091059	1	0.177889	0.0922139	0.141493	0.00866036	0.168628	2.63455e-05	0.165679	0.00142217	0.23385	1	-0.139512	1	0.0753409	1	0.186866	1	0.0135827	1	0.16218	1	0.0720499	0.125685	0.0204853	0.0222424	0.0570494	0.133795	0.0939075	-0.161611	FALSE
Samd9l	0.00856372	1	0.0524741	1	0.0564347	1	0.0222327	1	0.0668569	1	0.152166	1	0.0927082	1	0.115592	1	0.123451	1	0.148863	1	0.283545	1	0.148475	1	-0.0655252	1	0.0831286	1	0.117738	1	1	0.0413686	1	0.120319	1	0.119653	0.0937804	0.128091	FALSE
Uba1	0.000892244	1	0.215929	7.23639e-08	0.125275	1	0.0797283	1	-0.0311964	1	0.0874208	1	0.0734973	1	0.0432137	1	0.105911	1	0.181731	1	0.212184	1	0.156686	1	0.0462764	1	0.0604492	1	0.0481304	1	1	0.0764251	0.000284982	0.100116	1	0.104685	0.0937419	0.0775028	FALSE
Snrpd3	0.107207	1	0.000148853	1	0.102485	1	0.0604884	1	0.13829	1	0.103828	1	0.0688327	1	0.0467822	1	0.158179	0.0370245	0.135805	1	0.132952	1	0.274657	1	0.0978396	1	0.0763393	1	-0.0980421	1	1	0.0940346	1	0.0789024	0.763287	0.108221	0.0937194	0.112099	FALSE
Tmbim1	0.0573867	1	0.0450357	1	0.074818	1	0.00230291	1	0.117595	1	0.0260809	1	0.0778998	1	0.147908	8.25706e-05	0.0672212	1	0.259066	1	0.318327	1	0.026709	1	0.0498699	1	0.0745838	1	0.0607667	1	1	0.089305	0.0428278	0.14069	1	0.0511192	0.0937048	0.0608282	FALSE
Nampt	0.0116006	1	0.0518728	1	0.117512	1	0.0736911	1	0.120359	1	0.173898	1	-0.0370484	1	0.0267896	1	0.122142	1	-0.148158	1	-0.0232981	1	0.256134	1	0.0544276	1	0.265635	1	0.33976	1	1	-0.00909742	1	0.0882717	1	0.201889	0.0936878	0.0323117	FALSE
Slc47a1	0.123786	1	0.281113	8.29819e-06	-0.00693306	1	0.0831299	1	0.137038	1	-0.0731775	1	0.0853114	1	0.0739136	1	0.057572	1	0.446145	0.269573	0.192433	1	-0.0121113	1	0.068179	1	-0.0530936	1	0.00174612	1	0.988979	0.16131	0.00936603	0.126281	1	-0.00658075	0.0936701	0.0726505	FALSE
Snd1	0.210536	0.185113	0.108212	1	0.0596369	1	0.07963	0.0739622	0.0315785	1	0.0415072	1	0.140087	1	0.00265207	1	0.00633171	1	0.189564	1	0.0706319	1	0.0402102	1	0.172519	1	0.0473723	1	0.201964	1	0.57218	0.158467	1	0.0520894	1	0.06993	0.0934956	0.0518835	FALSE
Ncor2	0.260165	0.00018177	0.206997	8.06432e-07	0.102385	1	0.0960931	0.0136332	0.10813	1	-0.017693	1	0.0941007	1	0.0625251	1	0.052761	1	0.0250431	1	0.0832878	1	0.0282295	1	0.152589	1	0.13151	1	0.0153755	1	0.00399567	0.125598	0.0017649	0.11849	1	0.0362117	0.0934333	0.0567421	FALSE
Vmp1	-0.00158345	1	0.0299221	1	0.0644891	1	0.0574663	1	0.170231	0.209711	-0.00249276	1	0.138892	1	0.217094	4.52215e-07	0.00674728	1	0.0212549	1	0.21905	1	0.0881633	1	0.01391	1	0.124664	1	0.252929	1	1	0.045988	0.000351088	0.152192	1	0.0819672	0.0933824	0.121318	FALSE
Fam50a	0.00294838	1	0.0741877	1	0.00888817	1	-0.00275227	1	0.0998558	1	0.0347178	1	0.158754	2.13502e-05	0.147872	0.00114282	0.174784	1	-0.0694767	1	0.270617	1	-0.0154941	1	-0.00260227	1	0.0550382	1	0.460125	1	0.0178116	0.0173742	0.194599	0.129514	1	0.132604	0.0931642	0.0810083	FALSE
Desi2	0.0655538	1	0.0306634	1	0.0521826	1	0.114428	2.41711e-05	0.129395	1	0.0601806	1	0.141473	0.00243448	0.0399651	1	0.0248782	1	0.0319968	1	0.0554851	1	0.185136	1	0.321944	1	0.00111437	1	0.141296	1	0.000242804	0.135079	1	0.0513245	1	0.0927347	0.0930462	0.103521	FALSE
Tmem256	0.0433432	1	0.0767435	1	0.075193	1	0.0830261	1	0.096977	1	0.23014	0.77146	0.0298372	1	0.16742	1.19992e-08	0.148264	0.271746	-0.0579021	1	0.279826	1	0.0415347	1	0.0873516	1	0.0180702	1	0.0756598	1	1	0.0371312	6.96805e-05	0.127807	0.978335	0.114158	0.0930323	-0.147423	FALSE
mt-Nd5	0.215981	1	0.339961	3.16172e-07	0.231399	1	0.158155	0.000384438	0.0607926	1	0.190808	1	0.0911669	1	0.0516462	1	0.222435	0.0990866	0.0543972	1	-0.184079	1	-0.0159235	1	0.11362	1	0.0371697	1	-0.172168	1	0.107705	0.126664	0.000878209	0.0610983	0.914868	0.0913103	0.0930242	0.152709	FALSE
Nenf	0.0166435	1	-0.113113	1	0.0199922	1	0.0510026	1	0.00658937	1	0.0973802	1	0.106379	0.106613	0.0731848	1	-0.0488827	1	0.160004	1	0.430969	1	0.0239575	1	0.15013	1	0.220252	1	0.199897	1	0.923269	0.0968319	1	0.123576	1	0.0584688	0.092959	0.0595423	FALSE
Prdm1	0.112245	1	-0.0137448	1	0.0658059	1	0.0970952	1	0.0662018	1	0.165518	1	0.0385276	1	0.0989767	0.725316	0.148174	1	0.0270637	1	-0.0122786	1	0.142165	1	0.190492	1	0.112069	1	0.155059	1	1	0.0930847	0.999978	0.0502449	1	0.135345	0.0928914	-0.00380213	FALSE
Ppp1cc	0.137314	1	0.0675589	1	0.163322	1	0.0303394	1	0.0229608	1	-0.0219591	1	0.141105	0.000406484	0.0566944	1	0.14582	0.350161	0.0335794	1	0.0997252	1	0.110199	1	0.135393	1	0.209378	1	0.0618946	1	0.111167	0.0955459	1	0.0912635	0.995526	0.0918552	0.0928882	0.069953	FALSE
Eif4g2	0.137582	1	0.0915254	1	0.0813778	1	0.0599327	1	0.0585318	1	0.0393227	1	0.105014	1	0.0739885	1	0.104562	1	0.00220827	1	0.145908	1	0.118596	1	0.0219667	1	0.252931	1	0.0984401	1	1	0.0653408	1	0.124577	1	0.0884598	0.0927925	0.0706143	FALSE
Plcb3	0.17742	0.00708243	0.119733	0.0115855	0.135599	1	0.0554241	0.700068	0.0174831	1	0.0435866	1	0.121331	3.23707e-05	0.119946	2.77437e-06	0.0653051	1	0.283813	1	0.256867	1	-0.160652	1	0.122915	1	0.0160791	1	0.0149592	1	0.000525396	0.152181	0.000151551	0.106022	1	0.0197596	0.0926539	0.120653	FALSE
Rsf1	0.142655	1	0.0871011	0.173899	0.0562278	1	0.104967	0.0162264	0.0825737	1	0.0817407	1	0.0703181	1	0.077206	1	0.0649359	1	-0.131322	1	0.105869	1	0.0718584	1	0.261662	1	0.225114	1	0.0869349	1	0.60519	0.089656	0.967147	0.115573	1	0.0723396	0.0925227	0.119972	FALSE
Gpatch8	0.0444325	1	-0.00996922	1	-0.0187931	1	0.104174	0.00223641	0.0894005	1	-0.00161647	1	0.133896	0.00436559	0.0756157	1	0.109255	1	0.130513	1	0.167396	1	0.11108	1	0.118626	1	0.120956	1	0.211849	1	0.0104775	0.106328	1	0.0886798	1	0.0823549	0.0924543	0.0909755	FALSE
Nfkb1	0.0262746	1	0.292475	1.64971e-05	0.246614	1	-0.0484901	1	-0.000375272	1	0.0523723	1	0.00548808	1	0.00267055	1	0.189294	1	0.10674	1	-0.0572187	1	0.163568	1	0.350573	1	-0.0240792	1	0.080811	1	1	0.0881172	0.0149795	0.0426946	1	0.146532	0.0924479	-0.0135227	FALSE
Samd12	-0.0055889	1	0.0345014	0.000105481	0.0624572	1	0.0375038	1	0.0698735	1	0.0493977	1	0.11645	3.89813e-08	0.0963941	3.00607e-07	0.0904217	0.27602	0.15344	1	0.254176	0.50657	0.290468	1	0.000714133	1	0.0589239	1	0.0767428	1	0.000176224	0.0605037	3.01881e-07	0.102774	0.989744	0.113897	0.0923916	0.104509	FALSE
Mia3	0.106669	1	0.0798261	1	0.128827	1	0.0665501	1	0.0289913	1	0.0533448	1	0.133968	0.00381038	0.0844393	1	0.0501728	1	0.230965	1	0.236597	1	0.0140039	1	0.0831112	1	-0.123225	1	0.208501	1	0.346711	0.124253	1	0.0613257	1	0.0909698	0.0921827	0.0832916	FALSE
Ywhag	0.167061	1	0.135081	0.795326	0.164966	1	0.056512	1	0.0268987	1	0.047432	1	0.118664	0.0406221	0.08417	1	0.107406	1	0.0446583	1	0.109833	1	0.0909414	1	0.0590373	1	0.161963	1	0.00788909	1	0.779999	0.0891865	0.999996	0.103589	1	0.0837269	0.0921675	0.0493434	FALSE
Adgrl3	0.124748	1	0.0123914	1	0.0644156	1	0.0596752	1	0.0872166	1	0.0714939	1	0.110784	0.0216417	0.0743905	1	0.161808	1	0.0924095	1	0.119297	1	-0.0171674	1	0.107839	1	0.14182	1	0.170974	1	0.661398	0.099091	1	0.0870232	1	0.0903049	0.0921397	-0.0229493	FALSE
Micu2	0.0863583	1	0.0261251	1	-0.00657182	1	0.137881	7.91432e-09	0.146355	1	0.042516	1	0.163932	2.20244e-08	0.0432097	1	0.0601013	1	0.168989	1	0.181807	1	-0.117111	1	0.387131	0.0028179	0.0987918	1	-0.0376619	1	7.12356e-14	0.188858	1	0.0992578	1	-0.0117454	0.0921235	0.1346	FALSE
Mia2	0.0276447	1	0.0658654	1	0.0553118	1	0.0966422	0.183933	0.127576	1	0.132983	1	0.0419683	1	0.112699	0.74588	0.0942538	1	0.00263102	1	0.142048	1	0.117974	1	0.00575471	1	0.162508	1	0.195963	1	0.970817	0.0349282	0.999986	0.122139	1	0.119297	0.0921215	0.0743536	FALSE
Wbp4	0.0920285	1	0.0161387	1	0.123225	1	0.0304443	1	0.0524399	1	0.100213	1	0.108985	1	0.0705635	1	0.106826	1	0.197364	1	0.00568294	1	0.0272744	1	0.176349	1	0.0379529	1	0.235352	1	1	0.121034	1	0.0365556	1	0.118578	0.092056	0.0309066	FALSE
Ctdspl2	0.0660915	1	0.108058	0.477524	0.0787429	1	0.0980524	0.012691	0.0567363	1	0.183863	1	0.0270175	1	0.0180244	1	0.145713	1	0.0445572	1	-0.0760327	1	0.209784	1	0.0523973	1	0.159013	1	0.207072	1	0.557547	0.0576232	0.999001	0.0531598	1	0.165035	0.0919393	0.0271146	FALSE
Rras	0.078931	1	0.0761242	1	0.146863	1	0.099032	1	0.130931	1	0.0262621	1	0.0759859	1	0.141195	0.000426479	-0.0833796	1	0.0402795	1	0.0762362	1	-0.138115	1	0.298957	1	0.132517	1	0.274577	1	1	0.118637	0.114226	0.111401	1	0.0452416	0.0917597	0.0792743	FALSE
Arl6ip1	0.0865357	1	0.171953	1	0.261365	1	0.0864408	1	0.00646416	1	0.0379767	1	0.0378716	1	0.0782339	1	0.174858	1	0.0381717	1	-0.0945245	1	0.0686471	1	0.361264	1	0.0211308	1	0.0396826	1	1	0.122057	1	0.0366516	1	0.116506	0.0917381	0.134064	FALSE
Sqstm1	0.0791462	1	0.123096	1	0.197672	1	-0.0783078	1	0.0442831	1	-0.00855339	1	-0.0185024	1	0.0799385	1	0.0203504	1	0.312734	1	0.276252	1	0.227285	1	-0.096331	1	0.132804	1	0.0834423	1	1	0.0397477	1	0.131275	1	0.104039	0.0916873	0.0144142	FALSE
Vps13c	0.0677873	1	0.0352149	1	0.0625681	1	0.0618653	1	0.0128707	1	0.0210569	1	0.100426	0.00895815	0.0413394	1	0.0434199	1	0.0405245	1	0.0720887	1	0.0559654	1	0.194957	1	0.228426	1	0.332303	1	0.491803	0.093112	1	0.077988	1	0.103063	0.0913875	-0.00704455	FALSE
Cnot6	0.093369	1	0.0274148	1	0.00314483	1	0.0846448	0.535295	0.0605771	1	0.00872521	1	0.0870561	1	0.0256762	1	0.0882992	1	0.32107	1	0.196138	1	0.105082	1	0.055809	1	0.120587	1	0.0890319	1	0.999526	0.12839	1	0.0860785	1	0.0588567	0.0911084	0.076298	FALSE
Elf2	0.0336663	1	0.0073063	1	0.125791	1	0.05637	1	0.0300943	1	0.111928	1	0.0800442	1	0.0502504	1	0.11733	1	0.157024	1	0.181828	1	0.196136	1	0.0463244	1	0.132572	1	0.0384006	1	1	0.0746858	1	0.0804101	1	0.117917	0.0910043	0.0366782	FALSE
Fxr1	0.149607	1	0.132326	0.025682	0.126831	1	0.115498	0.0560724	0.0393047	1	0.0719025	1	0.123269	0.0681209	0.05587	1	0.124083	1	0.0514648	1	0.0351367	1	0.169252	1	0.0207587	1	-0.00344939	1	0.15135	1	0.347085	0.0921195	0.694551	0.0518376	1	0.128684	0.0908802	0.013499	FALSE
Lonp1	0.0320161	1	0.126723	1	0.186864	1	0.0729873	1	0.022172	1	0.0795792	1	0.00676979	1	-0.0101546	1	0.0721505	1	0.175464	1	0.0530365	1	0.34376	0.222362	0.0349295	1	-0.0237298	1	0.186991	1	1	0.0644333	1	0.0336094	0.981261	0.173869	0.0906372	0.101673	FALSE
Ppp3ca	0.0869017	1	0.0985353	1	0.1493	1	0.130753	0.00073882	0.0648559	1	-0.0266503	1	0.241281	1.18966e-07	0.123311	0.119053	0.104557	1	0.158594	1	0.0379505	1	0.105664	1	0.327872	1	-0.0765737	1	-0.169899	1	1.26029e-06	0.18908	0.935041	0.0496158	1	0.0325945	0.0904302	0.109251	FALSE
Ufl1	0.14463	1	0.00437893	1	0.053893	1	0.0760778	0.0246982	0.0178497	1	0.0365872	1	0.0959737	1	0.041928	1	0.084428	1	0.141502	1	0.105684	1	0.0868631	1	0.133888	1	0.00704141	1	0.325353	1	0.687021	0.118414	1	0.0353765	1	0.117425	0.0904052	0.103139	FALSE
Top2b	0.141097	1	0.113875	0.734374	0.143488	1	0.120102	0.0339113	0.112901	1	0.0422274	1	0.199109	1.61506e-08	0.0956324	1	-0.0430788	1	0.00498518	1	0.0880245	1	-0.0144158	1	0.16671	1	0.160796	1	0.0219983	1	5.74161e-06	0.126401	0.999982	0.114246	1	0.0300439	0.09023	0.0997184	FALSE
Rpl39	-0.289559	0.0143944	0.284263	1.32415e-12	0.217809	0.0727234	-0.0793527	1	0.117791	0.232352	0.246061	4.20091e-12	-0.0265553	1	0.114424	4.65934e-08	0.190992	4.0596e-18	-0.0535925	1	0.188066	1	0.0679212	1	-0.0670673	1	0.16815	1	0.272261	1	0.581881	-0.103225	2.84694e-15	0.174539	1.23255e-24	0.199009	0.0901074	-0.493521	FALSE
Itpr2	0.0846143	1	0.0591326	1	0.0491899	1	0.0627773	0.201949	0.0316316	1	0.102221	1	0.138134	3.91359e-07	0.074022	0.218909	0.0913662	1	0.24483	1	0.12087	1	0.0647774	1	0.0882445	1	0.010364	1	0.127973	1	0.000305073	0.12372	0.980511	0.059204	1	0.0871055	0.0900099	0.0833853	FALSE
Slirp	0.118328	1	-0.0175905	1	0.174155	1	0.0913214	0.0812794	0.0429547	1	0.183986	1	-0.0227952	1	0.0453378	1	0.224079	1.95374e-06	0.154478	1	0.00702718	1	0.104004	1	0.0573123	1	0.0151744	1	0.166649	1	0.889856	0.0797291	1	0.0185807	0.00336726	0.170575	0.0896282	-0.202757	FALSE
Atp2b1	0.144009	1	0.0388357	1	0.0680987	1	0.128669	0.349206	0.0815797	1	0.00359325	1	0.181954	0.00024255	0.0767889	1	0.00590477	1	-0.00742552	1	0.133752	1	0.164625	1	0.128324	1	0.144071	1	0.0514065	1	0.0435174	0.115106	1	0.0950053	1	0.0587256	0.0896123	0.117939	FALSE
Hnrnpl	0.131786	1	0.0770119	1	0.0362137	1	0.0567472	1	0.0170487	1	-0.00546395	1	0.131281	0.017359	0.0579645	1	0.0780053	1	0.184599	1	0.200337	1	0.148817	1	0.0961178	1	0.030957	1	0.0974492	1	0.618358	0.120106	1	0.0766638	1	0.0710042	0.089258	0.127365	FALSE
mt-Atp8	0.15295	1	0.115301	1	0.196572	1	0.16938	2.96603e-06	-0.0260963	1	0.300807	1	0.1526	0.985032	0.0345773	1	0.232023	1	0.170327	1	-0.0191838	1	0.142549	1	0.0176218	1	-0.223327	1	-0.078098	1	0.00449542	0.132576	1	-0.0237457	1	0.158771	0.0892001	-0.0121271	FALSE
Ccdc82	0.125392	1	0.0320164	1	0.0698079	1	0.0768506	0.18774	0.0283954	1	0.104631	1	0.113689	0.000282201	0.0657432	1	0.0899261	1	0.260437	1	0.0987654	1	0.0767618	1	0.216776	1	-0.0211049	1	-0.000361876	1	0.0323128	0.158629	1	0.0407631	1	0.068153	0.0891816	0.0648155	FALSE
Mprip	0.189053	1	0.0344274	1	0.0398555	1	0.158672	9.14028e-08	0.055689	1	-0.107207	1	0.169472	0.00048684	0.0568349	1	0.0230841	1	0.205583	1	0.254279	1	-0.0577142	1	0.211021	1	0.0990587	1	0.00154209	1	7.12639e-07	0.18676	1	0.100058	1	-0.0200879	0.08891	0.0309909	FALSE
Pfdn5	-0.0157754	1	0.004537	1	0.0572461	1	0.033536	1	0.0797188	1	0.0739661	1	0.0364998	1	0.063917	1	0.00725741	1	0.1766	1	0.215001	1	0.15335	1	0.0905265	1	0.231109	1	0.12437	1	1	0.0642773	1	0.118857	1	0.0832379	0.0887906	0.0334415	FALSE
Eea1	0.0740235	1	0.00538601	1	0.0686876	1	0.0804963	1	0.0607477	1	0.128828	1	0.0924592	1	0.073415	1	-0.00290525	1	0.075268	1	0.222405	1	0.120041	1	0.141741	1	-0.0369123	1	0.228031	1	1	0.0927976	1	0.0650083	1	0.108536	0.0887808	0.0796834	FALSE
Ddx41	0.13559	1	0.0663132	1	0.0584312	1	0.0434574	1	0.069656	1	0.081165	1	0.0131231	1	0.0825916	1	0.10415	1	0.0900451	1	0.208985	1	0.032044	1	0.112194	1	0.0924135	1	0.13678	1	1	0.078882	1	0.103992	1	0.0825139	0.0884626	0.0761868	FALSE
Nub1	0.261358	0.00123327	0.120588	0.0961692	0.133653	1	0.0963782	0.0119334	0.104812	1	0.14288	1	0.0949935	0.158591	0.0254683	1	0.0573018	1	-0.1134	1	-0.00060952	1	0.0259688	1	0.178627	1	0.202726	1	-0.00646888	1	0.00382741	0.103591	0.911306	0.090597	1	0.070667	0.0882851	0.0948476	FALSE
Agfg1	0.144202	1	-0.0165907	1	0.0399971	1	0.167013	1.01772e-09	0.125762	1	-0.0477161	1	0.173744	9.15188e-07	0.0862752	1	0.0889851	1	0.0976394	1	0.459403	1	0.0920671	1	0.131811	1	0.0607248	1	-0.279783	1	6.27101e-11	0.142882	1	0.143115	1	-0.02129	0.0882355	0.113159	FALSE
2900097C17Rik	0.0503876	1	0.214633	5.21209e-08	0.0150305	1	0.0464294	1	0.0715385	1	-0.0303748	1	0.0405163	1	0.0883072	1	0.0950865	1	0.161921	1	0.0738825	1	-0.0236066	1	0.217079	1	0.110837	1	0.191832	1	1	0.103267	0.000220974	0.11184	1	0.0495935	0.0882333	0.0758452	FALSE
Cdh15	-0.0261759	1	-0.162462	1	0.0253289	1	0.049441	1	0.235063	1	-0.0520259	1	0.0242268	1	0.262271	5.16236e-09	0.0147141	1	0.303849	1	0.441526	1	-0.267879	1	0.270119	1	0.216247	1	-0.0131809	1	1	0.124292	3.55397e-05	0.198529	1	-0.0586086	0.0880708	0.0366693	FALSE
Mcl1	-0.0489642	1	0.0834248	1	0.0667119	1	0.137779	1	-0.027125	1	0.0452296	1	0.187007	0.0530199	0.0832522	1	0.0760428	1	0.167841	1	0.010931	1	0.125224	1	0.257538	1	0.0771983	1	0.0783784	1	0.825721	0.14024	1	0.0455362	1	0.0783173	0.0880312	0.134595	FALSE
Hax1	0.144017	1	0.122794	1	0.191816	1	0.0756676	1	0.100462	1	0.056193	1	0.0296594	1	0.0606764	1	0.08578	1	0.0531393	1	-0.0892993	1	0.0389237	1	0.235483	1	0.132969	1	0.0786688	1	1	0.107593	1	0.0655203	1	0.0902762	0.0877966	0.0490267	FALSE
Rps27	-0.0238642	1	0.150322	8.02226e-06	0.193089	0.000466846	0.0126091	1	0.0471407	1	0.257823	8.18857e-11	-0.0463958	1	0.0642887	0.326835	0.226605	7.97703e-24	-0.226554	1	-0.0951561	1	0.187089	1	-0.0395971	1	0.158724	1	0.450032	0.0347228	1	-0.0647604	0.00416059	0.0650638	2.70135e-32	0.262928	0.0877437	-0.595094	FALSE
Mff	0.0276196	1	0.0193558	1	0.105352	1	0.0600627	1	0.0811065	1	0.0468846	1	0.0720456	1	0.00330734	1	-0.036686	1	0.145322	1	0.128125	1	0.0629982	1	0.237949	1	0.14485	1	0.216207	1	1	0.1086	1	0.0753489	1	0.0789512	0.0876333	0.0818598	FALSE
Cpne3	0.035182	1	0.17904	2.10457e-05	0.0234896	1	0.0423248	1	0.0760779	1	-0.0223807	1	0.155518	0.00244744	0.108047	0.101135	0.0469115	1	0.18897	1	0.0218121	1	0.130321	1	0.17248	1	0.0430732	1	0.113205	1	0.283358	0.118895	0.00358181	0.08561	1	0.0583094	0.0876048	0.0662911	FALSE
Map3k4	0.0824251	1	0.146004	0.00238133	0.1256	1	0.0940308	0.00334647	0.100298	1	0.0475455	1	0.0732366	0.0802289	0.066124	0.0240192	0.151661	1	-0.0366015	1	0.102772	1	0.189602	1	0.0966016	1	-0.0101204	1	0.0830428	1	0.0875715	0.0619385	0.0339381	0.0810156	1	0.11949	0.0874815	0.0182284	FALSE
Ifi203	-0.0575844	1	0.0632474	1	0.112012	1	0.0338511	1	0.172973	1	0.240746	1	0.0923746	1	0.161702	0.105184	0.253915	0.307535	-0.205615	1	0.0415263	1	0.139264	1	0.0800308	1	0.344835	1	-0.163297	1	1	-0.0113886	0.921755	0.156857	0.992783	0.116528	0.087332	0.132687	FALSE
Csnk1g1	0.0391316	1	0.028759	1	0.0429079	1	0.0555241	1	0.0767661	1	0.00933663	1	0.104298	0.105855	0.100504	1	0.0556518	1	0.205254	1	0.164177	1	0.025391	1	0.177597	1	0.116764	1	0.105959	1	0.922471	0.116361	1	0.097394	1	0.0478493	0.0872014	0.0709793	FALSE
Kdm5a	0.0334101	1	0.0157608	1	0.0598058	1	0.0499192	1	0.0835885	1	0.100177	1	0.14205	0.00312027	0.0875151	1	0.161224	1	-0.0221218	1	0.0812582	1	0.0601321	1	0.258598	1	-0.059368	1	0.25585	1	0.317045	0.0923711	1	0.0417509	1	0.127438	0.0871866	0.0872024	FALSE
Fam114a1	0.0903429	1	0.0141331	1	-0.0171347	1	0.0887746	9.12479e-05	0.0408574	1	0.0867691	1	0.143806	3.53863e-05	0.07649	0.222746	0.0754975	1	-0.0595613	1	0.184754	1	-0.0121047	1	0.134901	1	0.187817	1	0.270918	1	2.4363e-05	0.0796526	0.981343	0.10081	1	0.080789	0.0870839	0.0791969	FALSE
Lman1	0.0790314	1	0.0212491	1	0.0490968	1	0.154215	4.68549e-07	0.0650321	1	0.131885	1	0.140531	0.112581	0.144584	0.00480541	0.0924363	1	0.286524	1	0.0215152	1	0.0657906	1	0.231342	1	-0.0233521	1	-0.156662	1	0.000223043	0.178329	0.383309	0.0458057	1	0.0365093	0.0868813	0.202651	FALSE
Arpc1b	0.302195	3.5799e-06	0.136347	0.162182	0.148409	1	0.113665	0.00891215	0.0923188	1	-0.0125189	1	0.137798	0.000116218	0.082167	1	-0.121541	1	-0.0790559	1	0.328083	1	-0.0388335	1	0.19069	1	0.131848	1	-0.108528	1	8.68014e-08	0.133058	0.962201	0.154153	1	-0.0266025	0.0868696	0.173113	FALSE
Dcaf1	0.0874765	1	0.0367982	1	0.0923244	1	0.0638065	1	0.0714918	1	0.046086	1	0.0500621	1	0.0159087	1	0.0938181	1	0.0970282	1	0.0967776	1	0.0501005	1	0.134313	1	0.131189	1	0.234932	1	1	0.0865373	1	0.0704332	1	0.103452	0.0868076	0.0656265	FALSE
Calm2	0.0318478	1	0.153522	0.120623	0.0325483	1	0.0785894	1	0.0307552	1	0.0879677	1	0.132118	0.02527	0.0435552	1	0.0541745	1	0.157708	1	0.125657	1	0.164668	1	0.0550845	1	0.0899738	1	0.0636103	1	0.691436	0.0910695	0.936367	0.0886925	1	0.0805937	0.0867852	0.0951442	FALSE
Furin	0.118914	1	0.110413	0.295724	0.13924	1	0.0403864	1	0.0713651	1	0.136815	1	0.0673553	1	0.107278	0.0149317	0.0948771	1	0.021685	1	0.153679	1	0.110141	1	-0.110755	1	0.190398	1	0.0479723	1	1	0.0275172	0.369705	0.126627	1	0.105809	0.086651	0.0312351	FALSE
Rnf139	0.083462	1	0.0905712	1	0.0293099	1	0.0732729	1	0.0855808	1	-0.0145541	1	0.0346198	1	0.0718812	1	0.0744615	1	0.0876185	1	0.19363	1	0.0586419	1	0.167535	1	0.0875189	1	0.175941	1	1	0.0893016	1	0.105837	1	0.0647601	0.0866328	0.088422	FALSE
Gm17056	0.105858	1	0.124274	0.00134701	0.120226	1	0.171982	1.27916e-09	0.198119	0.000923077	0.0720502	1	0.0512751	1	0.108688	0.0219625	0.104918	1	0.00708218	1	0.210598	1	0.0243286	1	-0.0235333	1	0.15906	1	-0.135934	1	1.14972e-05	0.0625328	0.000133371	0.160148	1	0.0371178	0.0865995	0.0640334	FALSE
Spg20	0.0972987	1	0.0187487	1	0.0439597	1	0.170616	6.85218e-11	0.094979	1	-0.0187374	1	0.103167	0.0387877	0.0485845	1	0.0277335	1	0.171121	1	-0.100249	1	0.114954	1	0.189474	1	0.087178	1	0.248547	1	6.52946e-08	0.146335	1	0.0298482	1	0.0832912	0.0864916	0.091992	FALSE
Pxdn	0.0815335	1	0.141704	0.0258703	0.0771191	1	0.0222967	1	0.076809	1	0.0486075	1	-0.00362768	1	0.0220066	1	0.00323945	1	0.219882	1	0.0677261	1	0.191962	1	0.0420002	1	0.142193	1	0.163828	1	1	0.0724169	0.695956	0.0900876	1	0.0969512	0.0864853	-0.00301131	FALSE
Dctn4	0.127553	0.660477	0.0578077	1	0.127746	1	0.106994	3.71478e-05	0.120134	1	0.0174622	1	0.117723	0.1608	0.125784	0.0016143	0.119543	1	0.0224813	1	0.0566806	1	0.0833922	1	0.241609	1	0.0811238	1	-0.113957	1	0.00556585	0.123272	0.231737	0.0883059	1	0.0468374	0.0861384	0.0491207	FALSE
Ttc14	-0.0378345	1	0.0786182	1	0.100974	1	0.098127	0.0760321	0.117301	1	0.0532056	1	0.0929755	1	0.0851345	1	0.161274	1	0.104813	1	0.139325	1	0.115156	1	0.0499625	1	0.022388	1	0.109475	1	0.880712	0.0616087	1	0.0885532	1	0.108017	0.0860595	0.0781433	FALSE
Mat2b	0.0629576	1	0.0513265	1	0.10087	1	0.0511216	1	0.107178	1	0.130659	1	0.030307	1	0.0228463	1	0.049627	1	0.119453	1	-0.0220362	1	0.0339202	1	0.183155	1	0.235145	1	0.133759	1	1	0.089399	1	0.0788919	1	0.0897672	0.0860194	0.0519264	FALSE
Fgfr1	-0.0893351	1	-0.170397	1	0.00806371	1	0.0763067	1	0.144877	1	0.0112376	1	0.093242	1	0.158212	0.00870878	0.0125604	1	0.505114	1	0.236122	1	0.0742879	1	0.21923	1	0.128748	1	-0.119403	1	1	0.160912	0.486605	0.0995124	1	-0.00265067	0.0859245	0.189911	FALSE
Kdm2a	0.0839661	1	0.0944205	1	0.133491	1	0.0978358	0.000901629	0.0896071	1	0.102111	1	0.0738048	1	0.0950747	0.853298	0.136548	1	0.00423266	1	0.0248682	1	-0.0705265	1	0.166155	1	0.155447	1	0.101413	1	0.171963	0.0851989	0.999999	0.0918835	1	0.0806074	0.0858966	0.107552	FALSE
Nyap1	0.104972	1	0.0857531	0.0107029	0.064492	1	0.0627126	0.000591507	0.068342	1	0.106587	1	0.0688527	0.136096	0.0886098	8.70529e-05	0.0710303	1	0.0901963	1	0.048218	1	0.0947304	1	0.239879	0.399607	0.114708	1	-0.020656	1	0.0233695	0.113322	0.00196299	0.0811262	1	0.0632368	0.0858952	0.0513538	FALSE
Pdia6	0.248437	0.298967	0.165118	0.120858	0.105532	1	0.148059	0.000594642	0.187345	0.185031	0.0974674	1	0.123297	1	0.12656	0.884667	0.0184066	1	-0.0441397	1	0.0152391	1	-0.0365226	1	0.0367936	1	0.135627	1	-0.040825	1	0.0686002	0.102489	0.643893	0.125978	1	0.0288118	0.0857597	0.226215	FALSE
Aimp1	0.0544439	1	0.0516865	1	0.147093	0.75213	0.0731264	1	0.0329048	1	0.204488	0.00024202	0.0199917	1	0.0317374	1	0.0907601	1	0.0882749	1	0.0357634	1	0.231562	1	-0.0346599	1	0.0784764	1	0.178568	1	1	0.0402354	1	0.0461137	0.0695798	0.170494	0.0856144	-0.0122344	FALSE
Timm44	-0.0196914	1	0.0199581	1	0.0335696	1	0.0793377	1	0.0945215	1	0.080663	1	0.0857172	1	0.0400005	1	0.082385	1	0.0492828	1	0.0151283	1	0.11197	1	0.2566	1	0.177907	1	0.176668	1	1	0.0902494	1	0.069503	1	0.0970512	0.0856012	0.0393566	FALSE
Brd8	0.0664693	1	0.0221366	1	0.0254236	1	0.0933418	0.141545	-0.0163463	1	0.0712345	1	0.0824745	1	0.111308	0.773097	0.140393	1	0.0380225	1	0.00389345	1	0.0154502	1	0.165235	1	0.0192878	1	0.444354	1	0.951304	0.0891086	0.999992	0.0280559	1	0.139371	0.0855118	0.00360576	FALSE
Xiap	0.0330346	1	0.113564	0.401642	0.0283589	1	0.092728	1	0.104188	1	0.068703	1	0.0959351	0.0552486	0.0294735	1	0.0559528	1	0.0299298	1	-0.0137938	1	0.0243965	1	0.281126	1	0.127756	1	0.211148	1	0.832439	0.106551	0.997517	0.0722377	1	0.0777118	0.0855001	0.0550493	FALSE
Fam91a1	0.0206191	1	0.0582195	1	0.0486438	1	0.0250781	1	0.116551	1	0.0580709	1	0.0342959	1	0.000865774	1	0.023844	1	0.0972262	1	0.155464	1	0.0436114	1	0.132098	1	0.23087	1	0.236141	1	1	0.0618635	1	0.112394	1	0.0820623	0.0854399	0.0362018	FALSE
Zeb2	0.155961	1	0.194807	9.3802e-06	0.0638092	1	0.156817	4.88459e-07	0.177521	0.334098	0.0659676	1	0.175242	0.209683	0.132389	0.1753	0.0516468	1	0.0895837	1	0.119795	1	0.00932493	1	0.14579	1	-0.138032	1	-0.119925	1	0.000372499	0.144679	0.00132799	0.097296	1	0.0141648	0.0853798	0.169261	FALSE
Eapp	0.138712	1	0.110911	1	0.153004	1	0.0923978	0.380785	0.0885922	1	0.0960349	1	0.135562	0.0277723	0.0974665	0.0741349	0.123587	1	-0.149983	1	0.0869635	1	0.109865	1	0.04983	1	-0.00222329	1	0.149646	1	0.522784	0.0533038	0.877159	0.0763419	1	0.126428	0.0853577	0.0101101	FALSE
Sik2	0.0365265	1	0.0645693	1	0.0912187	1	0.0606159	1	0.0629453	1	0.152152	1	0.0856894	1	0.051016	1	0.0961166	1	0.165505	1	0.0813478	1	0.0441155	1	0.0501873	1	0.0655885	1	0.17244	1	1	0.0797048	1	0.0650934	1	0.111209	0.0853356	0.0843782	FALSE
Ahcyl1	0.200131	0.073813	0.105634	1	0.111375	1	0.0794754	1	0.0213898	1	-0.0197868	1	0.0386021	1	0.0447131	1	0.0624564	1	0.233764	1	0.223943	1	0.0148382	1	0.0652205	1	0.0461666	1	0.050666	1	0.876542	0.123438	1	0.0883693	1	0.0439098	0.0852392	0.0889589	FALSE
Ctnna1	0.183513	1	0.0875983	1	0.0655514	1	0.139973	1.18175e-05	0.10413	1	0.0146167	1	0.2128	1.86888e-06	0.167048	7.53139e-06	0.077552	1	0.111148	1	0.0659475	1	0.0559422	1	0.123415	1	-0.0122833	1	-0.120564	1	3.95101e-07	0.15417	0.00875759	0.0824883	1	0.0186197	0.0850925	0.0789374	FALSE
Txnrd1	0.0871683	1	0.0954678	1	0.0398821	1	0.172787	0.000173537	0.0387004	1	-0.0104817	1	0.0435412	1	0.0192889	1	0.0951721	1	0.213495	1	0.311287	1	0.230886	1	0.153713	1	-0.107481	1	-0.108372	1	0.0676122	0.134141	1	0.0714528	1	0.0494173	0.0850036	0.1661	FALSE
Gnai2	0.221659	0.0424243	0.0946919	1	0.0298089	1	0.0801744	0.239385	0.000892403	1	-0.091569	1	0.177095	3.83465e-06	0.0503858	1	-0.116306	1	0.488493	0.00313926	0.458165	0.0624412	0.0844854	1	0.191737	1	-0.0527798	1	-0.342947	1	1.65963e-06	0.231832	0.851775	0.110271	1	-0.0873055	0.0849323	0.195486	FALSE
Dnm3os	0.0491198	1	0.0697963	0.0381095	0.04233	1	0.161735	1.46351e-24	0.140466	0.000227972	0.0328651	1	0.113767	3.68339e-06	0.136472	2.09395e-17	0.0715925	1	0.0596807	1	0.150496	1	0.0548596	1	0.0532046	1	0.0987491	1	0.0387331	1	4.9209e-24	0.0875015	5.16375e-17	0.119196	1	0.0480761	0.0849245	0.103331	FALSE
Pdk1	0.0650056	1	0.0299919	1	0.0378781	1	0.110949	0.084333	0.0430446	1	0.0353256	1	0.0593392	1	0.0494161	1	0.10008	1	0.149593	1	0.066449	1	0.0890163	1	0.148769	1	0.0783523	1	0.206262	1	0.894758	0.106731	1	0.0534508	1	0.0937123	0.0846314	0.0351318	FALSE
Nkap	-0.0216949	1	0.0908982	1	0.0794922	1	0.0195489	1	0.0375137	1	0.0857147	1	0.0749807	1	0.0378432	1	0.087909	1	0.122701	1	0.142268	1	0.253138	1	0.131839	1	-0.00317897	1	0.129559	1	1	0.0654749	1	0.0610689	1	0.127163	0.0845688	0.0984716	FALSE
Sel1l	0.142509	0.898795	0.0568476	1	0.117986	1	0.096625	0.000144748	0.0774694	1	0.072591	1	0.0734184	1	0.0372464	1	0.0633608	1	0.0395588	1	-0.0300841	1	0.0671587	1	0.232145	1	0.0305127	1	0.190665	1	0.0567707	0.116851	1	0.0343984	1	0.102352	0.084534	0.0659503	FALSE
Tcf7	0.135753	1	0.0836269	1	0.0891712	1	0.113399	0.0321108	0.0195972	1	-0.0913792	0.197204	0.0460512	1	0.0821644	0.00212844	-0.00908477	1	0.143818	1	0.347511	0.911564	0.147391	1	0.179915	1	0.0552891	1	-0.0761984	1	0.736992	0.123787	0.253605	0.117638	0.974998	0.01198	0.0844683	0.156986	FALSE
Rnf111	0.0430268	1	0.076383	1	0.0629023	1	0.0184646	1	-0.0166027	1	-0.0102774	1	0.0789678	1	0.0649122	1	0.0961554	1	0.109425	1	0.0350654	1	0.122156	1	0.132145	1	0.101212	1	0.352051	1	1	0.0764058	1	0.052194	1	0.124597	0.0843991	0.0374998	FALSE
Tcf7l2	0.0800349	1	0.112479	0.18275	0.0846689	1	0.00787583	1	0.0441749	1	-0.00994747	1	0.0431908	1	0.107592	0.000128739	0.139208	1	0.0225308	1	0.0801866	1	-0.0369887	1	0.099177	1	0.139395	1	0.352192	1	1	0.0505619	0.0190028	0.0967656	1	0.105827	0.0843847	0.0205328	FALSE
Psme4	0.104105	1	0.048049	1	0.0479756	1	0.0529402	1	0.0165787	1	-0.058244	1	0.109927	1	0.062602	1	0.0472538	1	0.124516	1	0.249844	1	0.153456	1	0.129351	1	-0.00295939	1	0.177542	1	1	0.104168	1	0.0748229	1	0.0735967	0.0841958	0.0662799	FALSE
Cttn	0.188907	0.37519	0.0727394	1	0.148583	1	0.0492754	1	-0.0112051	1	0.0119072	1	0.0671118	1	0.0373071	1	-0.0273136	1	0.284173	1	0.0665085	1	0.20079	1	0.0776283	1	0.0977696	1	-0.00289401	1	0.996633	0.133419	1	0.0526239	1	0.0662145	0.0840859	0.0973298	FALSE
Ubac1	0.0654005	1	0.0628023	1	0.0173618	1	0.0876245	0.139103	0.0765022	1	0.0471398	1	0.0534743	1	0.08644	1	0.0546029	1	0.302659	1	0.18497	1	0.132737	1	0.172634	1	-0.0178113	1	-0.0657583	1	0.94979	0.136359	1	0.0785806	1	0.0372167	0.0840519	0.0989866	FALSE
Iars2	0.0666806	1	-0.00805887	1	0.119014	1	0.0920496	0.159849	0.0880444	1	0.10489	1	0.0709244	1	0.057936	1	0.0586523	1	0.241398	1	0.0695342	1	0.0819162	1	0.0896509	1	0.0486386	1	0.0781017	1	0.96112	0.112141	1	0.0512189	1	0.0885149	0.0839582	0.00996092	FALSE
Igf1r	0.0540852	1	0.0671669	1	0.0397226	1	0.0811612	1	0.026423	1	-0.0121915	1	0.137299	0.00294459	0.0852319	1	0.0723585	1	0.0662184	1	0.358751	1	0.0127366	1	0.128557	1	0.0347146	1	0.105957	1	0.308769	0.093464	1	0.114458	1	0.0437166	0.0838794	0.104273	FALSE
Rtn3	0.180757	0.18272	0.116643	0.0232259	0.111831	1	0.086241	0.0551097	0.0718116	1	0.0478291	1	0.130231	0.0528115	0.107841	0.0114114	-0.00313233	1	0.147013	1	0.247716	1	0.0208023	1	0.0683188	1	-0.0168915	1	-0.0592996	1	0.129226	0.122512	0.0869132	0.105424	1	0.023606	0.0838473	0.108846	FALSE
Pcmtd1	0.0802541	1	0.12155	0.00571397	0.0472598	1	0.139979	3.3559e-07	0.142121	0.0984558	0.0478752	1	0.138274	4.19669e-06	0.12562	0.0055719	0.080669	1	0.167295	1	0.207085	1	0.0145506	1	0.123286	1	-0.0424044	1	-0.137354	1	3.7875e-08	0.129818	0.00472683	0.110794	1	0.0106002	0.0837373	0.0766199	FALSE
Zfp516	0.0465395	1	0.0361658	1	0.012648	1	0.0385074	1	0.0448847	1	0.0294748	1	0.0741773	1	0.123881	2.33685e-05	0.144179	1	0.103064	1	0.222359	1	0.0604466	1	0.20888	1	0.0664244	1	0.0423521	1	1	0.0942336	0.0189175	0.098743	1	0.0578201	0.0835989	0.0419567	FALSE
Ndel1	0.0209045	1	0.0839393	1	0.0330806	1	0.0709672	1	0.123815	1	0.0266559	1	0.11982	0.0443063	0.15047	0.000141128	0.0498533	1	0.0156864	1	0.178819	1	0.154761	1	0.0254294	1	0.284739	1	-0.0863081	1	0.7953	0.0505614	0.059662	0.164356	1	0.0356085	0.0835088	0.000999339	FALSE
Ago2	0.0703998	1	0.0108304	1	0.12687	1	0.0775545	0.116754	0.0564202	1	0.108375	1	0.0757375	1	0.0423789	1	-0.0476497	1	0.190662	1	0.100352	1	0.111158	1	0.247932	1	-0.0109313	1	0.0916043	1	0.93304	0.132457	1	0.0398101	1	0.0780716	0.0834463	0.0595655	FALSE
Zmym4	0.156193	0.671149	0.0692681	1	0.0866867	1	0.0852883	0.00677309	0.0339876	1	-0.0235863	1	0.0977693	0.134666	0.0170453	1	0.0294392	1	0.109413	1	0.0396465	1	0.133024	1	0.12641	1	-0.00966194	1	0.299574	1	0.139639	0.115015	1	0.0300571	1	0.105028	0.0833665	0.0475296	FALSE
Ptpn9	0.0412349	1	0.0333975	1	0.0542816	1	0.0684682	0.18814	0.0287026	1	0.0785884	1	0.0919481	0.029883	0.0533471	1	0.045485	1	0.25586	1	0.225428	1	0.0891259	1	0.0915025	1	0.00704429	1	0.085087	1	0.409322	0.109803	1	0.069584	1	0.0705136	0.0833001	0.0414368	FALSE
Stambp	0.00424844	1	0.0108952	1	0.0844571	1	0.112726	2.96876e-07	0.0723159	1	0.104881	1	0.1383	2.5615e-05	0.0694534	1	0.0791924	1	0.152003	1	0.125468	1	0.0806073	1	0.000989428	1	0.0096272	1	0.203757	1	1.601e-07	0.0816535	1	0.057552	1	0.110579	0.0832615	0.0835217	FALSE
Gja1	0.0444517	1	0.0867626	1	0.0285117	1	0.0637725	1	0.0939012	1	0.0111563	1	0.105552	1	0.122884	0.00024423	0.00589145	1	0.117977	1	0.0806676	1	0.0716316	1	0.251128	1	0.120463	1	0.0433694	1	1	0.116576	0.0828456	0.100936	1	0.0321121	0.083208	0.0698475	FALSE
Fam117b	0.0617226	1	0.0625941	1	0.0477939	1	0.0533899	1	0.0172961	1	0.0409569	1	0.079981	0.184298	0.0778889	1	0.0469972	1	0.14985	1	0.138817	1	-0.0192505	1	0.15098	1	0.163737	1	0.174941	1	0.970941	0.0991848	1	0.0920666	1	0.0582876	0.0831797	0.0593742	FALSE
Lsm10	0.0792053	1	0.0444811	1	0.0408748	1	0.0629837	1	0.0779802	1	0.0390548	1	0.0541357	1	0.0960055	0.0255981	0.00713158	1	0.0537159	1	0.0841673	1	0.0301231	1	0.116812	1	0.234997	1	0.225111	1	1	0.0733706	0.693921	0.107526	1	0.0684591	0.0831186	0.104883	FALSE
Tex10	0.0881406	1	0.0996784	0.933765	0.11314	1	0.0581935	1	-0.0302933	1	0.0653841	1	0.0207288	1	0.00510365	1	0.0892626	1	0.0970254	1	0.0364375	1	0.123968	1	0.135319	1	0.0221053	1	0.321282	1	1	0.0798815	1	0.0266063	1	0.142607	0.0830317	0.0562306	FALSE
Taf1	0.0943545	1	0.11008	1	0.100839	1	0.0827323	1	0.0380138	1	0.0211842	1	0.0814958	1	0.0126183	1	-0.00432437	1	0.134722	1	0.280424	1	0.0756386	1	0.215378	1	0.0464202	1	-0.0441851	1	1	0.121736	1	0.0975112	1	0.0298304	0.083026	0.0915068	FALSE
Arfgap3	0.00588191	1	-0.037616	1	0.010947	1	0.0827746	1	0.12737	1	0.104938	1	0.0589807	1	0.0617915	1	0.0222769	1	0.181242	1	0.129181	1	0.20914	1	0.0962502	1	0.0804075	1	0.111363	1	1	0.0850258	1	0.072227	1	0.0917328	0.0829952	0.0769072	FALSE
Hpf1	-0.0594204	1	0.0266803	1	0.0304269	1	0.0840699	0.147343	0.12818	1	0.132989	1	0.115616	1	0.0314323	1	0.114006	1	0.252784	1	0.103963	1	-0.0133262	1	0.0560553	1	0.0124706	1	0.228588	1	0.954691	0.0898211	1	0.0605453	1	0.0985367	0.0829677	0.0785667	FALSE
Rabgap1	0.0976683	1	0.144852	4.21521e-07	0.0478098	1	0.105985	0.00118456	0.0964608	1	0.0722432	1	0.0667026	1	0.0716681	1	0.0326588	1	0.101016	1	0.057817	1	0.048436	1	0.0988562	1	0.102359	1	0.0987502	1	0.198223	0.0940456	0.00108978	0.0946313	1	0.0599796	0.0828855	0.0914889	FALSE
Mcub	0.0166005	1	-0.108607	1	0.0387107	1	0.103	0.110547	0.126858	1	-0.0476303	1	0.189606	4.14279e-07	0.0925761	1	-0.00815893	1	0.0322064	1	0.253817	1	0.167514	1	0.204697	1	-0.0239886	1	0.205956	1	0.00019982	0.109222	1	0.0681313	1	0.0712782	0.0828772	0.186959	FALSE
Jmjd1c	0.0781537	1	0.12517	0.040732	0.137456	1	0.0319415	1	0.04391	1	0.0981674	1	0.0344222	1	0.0450903	1	0.06562	1	-0.00932486	1	0.100343	1	0.0745173	1	0.069568	1	0.176271	1	0.170589	1	1	0.0409521	0.780481	0.0981569	1	0.10927	0.082793	0.0912942	FALSE
Pdcd4	0.136366	0.0386396	0.109542	0.0031154	0.0812133	1	0.100849	2.6396e-05	0.0216269	1	0.0727254	1	0.186237	1.63275e-07	0.0880117	1	0.138687	1	0.288935	1	0.0764849	1	0.032867	1	0.0647482	1	-0.00978908	1	-0.148781	1	5.98486e-09	0.155427	0.316819	0.0571752	1	0.0353424	0.0826482	0.0296844	FALSE
Cdc42ep2	0.123741	1	0.0406461	1	0.0469716	1	0.0776036	0.594922	0.00153536	1	-0.0238301	1	0.0725434	1	0.0575689	1	0.0522494	1	-0.0631176	1	0.0734129	1	0.199283	1	0.122477	1	0.156869	1	0.301753	1	0.999795	0.0666496	1	0.0660064	1	0.115285	0.0826471	0.111815	FALSE
Zc3h14	0.111745	1	0.144747	0.00227952	0.180219	1	0.148426	4.4147e-06	0.0933205	1	0.0352775	1	0.125257	0.265822	0.0965309	0.209443	0.0880717	1	0.028063	1	-0.0244922	1	0.0667392	1	0.0342009	1	0.131038	1	-0.0199332	1	0.0023249	0.0895384	0.121699	0.0882288	1	0.0700749	0.082614	0.0666933	FALSE
Rdx	0.20735	1	0.0658191	1	0.118812	1	0.101362	0.172941	0.0207284	1	0.0682158	1	0.0578756	1	-0.0217963	1	0.0753789	1	0.209725	1	0.120891	1	0.158876	1	0.0905891	1	-0.0788772	1	0.0442489	1	0.966771	0.13338	1	0.021353	1	0.0931063	0.0826132	0.0974997	FALSE
Olfr1501	0.0147927	1	0.077278	0.249088	0.0407304	1	0.0668522	0.00719885	0.168034	3.69727e-06	0.0871522	1	0.0587669	1	0.107158	8.04977e-07	0.0811529	1	0.0432751	1	0.278213	0.844315	0.0861404	1	0.0880383	1	-0.0027213	1	0.044004	1	0.452179	0.0543451	1.88394e-08	0.125592	1	0.067836	0.0825911	0.0685096	FALSE
Klf13	0.200469	1	0.0376228	1	-0.0444559	1	0.123072	0.00570428	0.0211887	1	-0.133529	1	0.19428	0.000124752	0.0544472	1	0.00323987	1	0.153755	1	0.210898	1	0.045469	1	0.267992	1	0.111952	1	-0.00758244	1	0.00160911	0.187914	1	0.0872218	1	-0.0273718	0.0825879	0.132309	FALSE
Flii	0.157995	1	0.0956178	0.140986	0.0354468	1	0.0715698	1	0.104876	1	4.48468e-05	1	0.1441	0.000417044	0.0772858	1	-0.0123125	1	0.109326	1	0.31234	1	-0.00208845	1	0.146038	1	0.0508207	1	-0.0530313	1	0.112792	0.125806	0.950962	0.128188	1	-0.00638813	0.0825353	0.0918997	FALSE
Sh3d19	0.0560645	1	0.0679064	1	0.0312687	1	0.119373	0.000722461	0.204924	0.000104913	0.126983	1	0.0693093	1	0.0555784	1	0.0526985	1	-0.0189419	1	0.252839	1	-0.057382	1	0.1988	1	0.0771883	1	0.00125924	1	0.15279	0.084921	0.0497265	0.131687	1	0.0309656	0.0825246	0.0568789	FALSE
Rp9	-0.0369593	1	0.00115468	1	0.00181524	1	0.0598163	1	0.0172932	1	0.0522641	1	0.0303097	1	0.0535998	1	0.0377547	1	0.26761	1	0.3855	1	0.198834	1	0.157521	1	0.065077	1	-0.0540664	1	1	0.0956596	1	0.104525	1	0.0473203	0.0825016	0.138555	FALSE
Spag9	0.143517	1	0.151983	0.0301181	0.0679733	1	0.100311	0.0850868	0.0519948	1	-0.00790006	1	0.188915	0.000836514	0.0779353	1	0.1104	1	0.155795	1	0.194074	1	-0.0326286	1	0.164406	1	-0.100091	1	-0.0293534	1	0.0390021	0.150589	0.724949	0.0751792	1	0.0216982	0.0824888	0.068174	FALSE
Mnat1	0.0610028	1	0.042573	1	0.118579	1	0.0925261	0.0971377	0.11738	1	0.120963	1	0.166801	0.0112542	0.0846295	0.712874	0.142332	1	0.163795	1	0.0422979	1	0.0302982	1	-0.0772058	1	0.114639	1	0.0162707	1	0.190188	0.0813837	0.999972	0.0803038	1	0.0856885	0.0824587	0.0230141	FALSE
Trip12	0.147679	1	0.0895141	1	0.152587	1	0.0505046	1	0.0469357	1	0.0632443	1	0.113946	0.276384	0.0403139	1	0.0881478	1	-0.00950799	1	-0.0203279	1	0.0166718	1	0.142108	1	0.075483	1	0.238484	1	0.989786	0.088946	1	0.0463838	1	0.111827	0.0823856	0.0558203	FALSE
Hnrnpul2	0.182512	1	0.132965	0.115848	0.052171	1	0.077448	0.22267	0.0794247	1	-0.0145158	1	0.11103	1	0.0567844	1	0.0507494	1	0.199087	1	0.216778	1	-0.0535921	1	0.183673	1	0.029721	1	-0.0688085	1	0.981327	0.15075	0.932231	0.103134	1	-0.00679922	0.0823617	0.0916534	FALSE
Bet1	0.0696319	1	0.00332207	1	0.0658631	1	0.0348317	1	0.0754251	1	0.0798885	1	0.0630425	1	0.0917186	0.662954	0.109205	1	0.0315847	1	0.00852458	1	0.0557207	1	0.160738	1	0.234002	1	0.151455	1	1	0.0719657	0.99993	0.0825985	1	0.0924263	0.0823302	0.0588381	FALSE
Ahr	0.0730862	1	0.0473216	1	0.0455656	1	0.191109	9.84348e-08	0.0961974	1	-0.00354678	1	0.158251	0.000125935	0.109553	0.103315	0.15532	1	-0.0170927	1	0.00493079	1	0.0244442	1	0.116859	1	0.0348791	1	0.197227	1	2.42414e-07	0.104442	0.91972	0.0585764	1	0.083802	0.0822736	0.0861584	FALSE
Thra	0.0449733	1	-0.0238318	1	-0.0173526	1	0.0838893	1	-0.00687717	1	0.0608715	1	0.101052	1	0.0458323	1	0.002034	1	0.0888455	1	0.295914	1	0.0745585	1	0.17222	1	0.0385979	1	0.273255	1	1	0.0981961	1	0.069927	1	0.0786732	0.0822654	0.0840945	FALSE
Fth1	0.123857	1	-0.0340459	1	0.261829	7.24557e-06	0.202125	2.49243e-11	-0.043828	1	0.0271492	1	0.214178	1.56055e-10	-0.0126407	1	0.0523232	1	0.345903	0.128768	0.0307825	1	0.0253041	1	0.204528	1	-0.149636	1	-0.0147083	1	1.3123e-16	0.218118	1	-0.0418737	0.00852547	0.0703795	0.0822081	0.283492	FALSE
Smarcc1	0.193218	1	0.180674	0.000787823	0.145183	1	0.0854614	1	0.0149919	1	-0.00203803	1	0.141266	0.766348	0.0490049	1	0.105095	1	0.109835	1	-0.0505887	1	0.0630924	1	0.158067	1	0.14434	1	-0.10726	1	0.999991	0.137569	0.160064	0.0676844	1	0.0408144	0.0820227	0.0839141	FALSE
Plin3	0.140494	1	0.0721006	1	0.0118215	1	0.119883	0.000811652	0.0509265	1	-0.00742058	1	0.139853	0.000335718	0.107869	1	0.0557787	1	0.246761	1	0.175687	1	0.0205213	1	0.18521	1	0.00580585	1	-0.0998072	1	0.00078508	0.16644	1	0.0824779	1	-0.00382124	0.081699	0.196371	FALSE
Parp14	-0.0017928	1	0.0146776	1	0.0899091	1	0.0511566	1	0.0517462	1	0.0641687	1	0.0811957	1	0.0973807	1	0.112346	1	-0.0403711	1	0.224326	1	0.0175446	1	0.183183	1	0.211766	1	0.0665704	1	1	0.0546742	1	0.119979	1	0.0701077	0.081587	0.12354	FALSE
Suco	0.168603	0.506453	0.0876072	1	0.148968	1	0.0769122	1	0.00497779	1	0.0567853	1	0.0986089	0.29927	0.0333061	1	0.0592256	1	0.0247873	1	0.0509261	1	0.183812	1	0.102946	1	0.0375162	1	0.0880949	1	0.956988	0.0943714	1	0.0428666	1	0.107377	0.0815384	0.0299048	FALSE
Stag2	-0.0596	1	0.111562	1	0.0835558	1	0.0737541	1	0.106468	1	0.0261123	1	0.120127	0.753271	0.0832207	1	0.0194857	1	0.109924	1	0.170546	1	0.0175652	1	0.117853	1	0.060062	1	0.181618	1	0.999988	0.0724118	1	0.106372	1	0.0656674	0.0814837	0.000183749	FALSE
Dclk1	0.0640905	1	0.137079	0.160048	0.0447512	1	0.0489777	1	0.144858	1	0.113787	1	0.0721325	1	0.0635088	1	0.0708096	1	0.1406	1	0.185142	1	0.110486	1	0.115051	1	0.0209256	1	-0.110224	1	1	0.0881704	0.961213	0.110303	1	0.045922	0.081465	0.0840157	FALSE
Sptan1	0.179242	1	0.17631	4.75427e-05	0.0104567	1	0.164579	0.00104952	0.106822	1	-0.104933	1	0.10535	1	0.0737523	1	0.02622	1	0.348021	1	0.187934	1	0.00605312	1	0.0888545	1	-0.0813709	1	-0.0653713	1	0.186206	0.177209	0.0301373	0.0926895	1	-0.0255149	0.0814613	0.12728	FALSE
Pitpna	0.170084	1	0.00532683	1	0.095602	1	0.0871711	1	0.0756456	1	-0.0345073	1	0.146331	0.380316	0.0386274	1	-0.0651273	1	0.374033	1	0.37904	1	0.134123	1	0.117743	1	-0.155931	1	-0.146591	1	0.996825	0.179072	1	0.0685417	1	-0.00330013	0.081438	0.19906	FALSE
Jag1	-0.0487422	1	0.0399024	1	0.00661001	1	-0.104823	0.000273904	0.0280352	1	0.0884034	1	-0.0434319	1	0.10756	0.000988629	0.170254	0.181787	0.293389	1	0.0633772	1	-0.0360504	1	0.119267	1	0.189076	1	0.347345	1	0.0885989	0.0431318	0.180492	0.0855903	0.970071	0.115312	0.0813449	-0.0768914	FALSE
Yeats4	0.0693836	1	0.0270168	1	0.0621921	1	0.0615753	1	0.103017	1	0.123881	1	0.020137	1	0.0481129	1	-0.00572062	1	0.0855007	1	0.182199	1	0.149464	1	0.055532	1	0.190602	1	0.0462567	1	1	0.0584257	1	0.110189	1	0.0752146	0.0812766	0.087931	FALSE
Ubtf	0.111189	1	0.0533674	1	0.0146998	1	0.0933916	0.0202772	0.00399238	1	-0.0541483	1	0.129477	0.0340482	0.0593027	1	0.0857815	1	0.0175581	1	0.168929	1	0.0154163	1	0.229327	1	0.143178	1	0.147079	1	0.149088	0.116189	1	0.0857539	1	0.0417657	0.0812361	0.12285	FALSE
Enpp2	0.024995	1	-0.0718776	1	0.0896284	1	0.0989926	1	0.0876989	1	-0.000941517	1	0.123292	0.5784	0.0692729	1	0.0428836	1	0.394222	0.099098	0.0806845	1	-0.0483006	1	0.154703	1	0.038786	1	0.134453	1	0.838351	0.159241	1	0.0409129	1	0.0435445	0.0812328	0.0917379	FALSE
Jak1	0.0727057	1	0.0575172	1	0.0887474	1	0.0368083	1	0.0530862	1	0.0113377	1	0.133141	0.0928512	0.0261979	1	0.0559684	1	0.0425535	1	0.0747261	1	-0.125386	1	0.273567	1	0.153187	1	0.264163	1	0.907024	0.111755	1	0.0729428	1	0.0589662	0.0812214	0.0898398	FALSE
Dnaja1	0.191995	0.667747	0.216745	0.000573437	0.128279	1	-0.0132637	1	0.048032	1	0.0226668	1	0.0849119	1	0.0919213	1	0.0333936	1	0.195314	1	-0.0407509	1	0.228948	1	-0.0578762	1	0.0991391	1	-0.0134983	1	0.999936	0.0802161	0.134719	0.0830173	1	0.079958	0.0810638	0.0196555	FALSE
Spred2	0.115606	1	0.131499	0.0680295	0.108329	1	0.0286974	1	0.0194896	1	-0.00872488	1	0.027901	1	0.0566709	1	0.0658558	1	-0.0966248	1	0.304256	1	0.134807	1	0.0748221	1	0.06339	1	0.188218	1	1	0.0300804	0.864716	0.115061	1	0.0976969	0.0809462	0.0435526	FALSE
Luzp1	0.179328	1	0.142032	0.178038	0.0717852	1	0.0201036	1	0.0734528	1	-0.00639829	1	0.0748039	1	0.0823455	1	-0.0170383	1	0.186548	1	0.106182	1	0.0642073	1	0.346675	1	-0.0235228	1	-0.0864376	1	1	0.161492	0.968719	0.076098	1	0.00522366	0.0809378	0.118808	FALSE
Smarca2	0.230621	8.52986e-05	-0.0157831	1	0.140263	1	0.0688416	0.00012781	0.0467803	1	-0.00184732	1	0.144599	4.16945e-08	0.0261489	1	0.072969	1	0.258986	1	0.047373	1	0.03413	1	0.147678	1	0.0449107	1	-0.0332571	1	3.31395e-11	0.170145	1	0.029886	1	0.0424516	0.0808275	0.0794068	FALSE
Cox20	0.101189	1	-0.0197307	1	0.0913694	1	0.1187	9.6073e-05	0.0459789	1	0.0308139	1	0.152773	0.00280988	0.195363	1.24809e-07	0.0244873	1	0.13959	1	0.0166382	1	0.0433137	1	-0.0471864	1	0.0681008	1	0.25037	1	0.000779564	0.0930131	0.000433515	0.06127	1	0.0880709	0.0807847	-0.091198	FALSE
Eef1g	0.10279	1	0.276001	1.82637e-16	0.105756	1	0.0272773	1	0.00590795	1	0.137859	1	-0.0178425	1	0.048902	1	0.141845	0.000943898	0.173248	1	0.107515	1	0.0651384	1	-0.133262	1	0.027263	1	0.142953	1	1	0.0304421	1.46999e-11	0.0931178	0.176163	0.11871	0.0807567	0.0862649	FALSE
Tigd2	0.121124	1	0.0216908	1	0.00212822	1	0.0749451	0.151679	0.044079	1	0.13588	1	0.129554	0.00223292	0.0685724	1	0.0712956	1	0.0398096	1	0.00176708	1	0.0703349	1	0.112955	1	0.0765241	1	0.240436	1	0.100181	0.0956774	1	0.0425267	1	0.104015	0.0807397	0.0952033	FALSE
Lgals7	0.310123	0.000160744	0.178188	3.77002e-05	0.125427	1	0.0904816	1	0.11388	1	-0.0830572	1	0.133277	0.00647109	0.157142	4.92024e-07	-0.0461354	1	0.0658888	1	0.417042	1	-0.0191141	1	0.0793221	1	0.0255437	1	-0.337426	1	0.00212835	0.135819	3.40959e-07	0.178359	1	-0.0720613	0.0807054	0.160524	FALSE
Creb1	0.0458588	1	0.0743284	0.87776	0.0634155	1	0.043336	1	0.0612969	1	0.0367804	1	0.0161935	1	0.0219139	1	0.070335	1	0.0358837	1	0.0818753	1	0.0777199	1	0.0924104	1	0.174777	1	0.313289	1	1	0.0467365	1	0.0828383	1	0.112308	0.0806276	0.0257712	FALSE
Fermt2	0.101503	1	0.0100457	1	-0.00501863	1	0.0794756	1	0.0852557	1	0.0896803	1	0.0894763	1	0.0116653	1	0.0869123	1	-0.0763081	1	-0.107037	1	0.00117735	1	0.229931	1	0.196189	1	0.415546	1	1	0.0848156	1	0.0392237	1	0.117659	0.0805662	0.0284285	FALSE
Tmem5	0.164992	1	0.0540829	1	0.119843	1	0.0136865	1	0.0926301	1	0.0219588	1	0.0681919	1	0.0390247	1	0.0362609	1	0.0605563	1	0.175726	1	0.215112	1	0.138829	1	-0.00692422	1	0.0135801	1	1	0.0892512	1	0.070908	1	0.0813509	0.0805033	-0.00574396	FALSE
Ctdsp2	0.0576436	1	0.0472015	1	0.0108017	1	0.129588	0.000541195	0.0421391	1	0.00623056	1	0.0663642	1	0.0781949	1	0.0123746	1	0.110583	1	0.142799	1	0.173285	1	0.177625	1	0.0586533	1	0.0933952	1	0.130485	0.108361	1	0.0737976	1	0.0592175	0.0804586	0.0172468	FALSE
Luc7l2	0.202427	1	0.150024	0.152091	0.146985	1	0.0548882	1	0.0415374	1	0.104485	1	0.0730103	1	0.0736392	1	0.0570642	1	0.106732	1	0.235782	1	0.0315924	1	0.144636	1	-0.0268702	1	-0.189235	1	1	0.116339	0.957264	0.0948225	1	0.0301782	0.0804465	0.101085	FALSE
R3hdm1	0.179277	1	0.078398	1	0.150696	1	0.0401559	1	0.123363	1	0.0568571	1	0.0931113	1	0.0528862	1	0.0576109	1	-0.0148621	1	-0.0761156	1	0.0771298	1	-0.000153129	1	-0.0178053	1	0.402869	1	1	0.0595058	1	0.0321453	1	0.149033	0.0802279	0.08115	FALSE
E130311K13Rik	0.0276617	1	0.0204508	1	0.046865	1	0.119981	1.71595e-08	0.0932074	1	0.0489041	1	0.119646	2.19599e-05	0.0731001	0.768612	0.0500336	1	0.125493	1	-0.090776	1	-0.0175573	1	0.119362	1	0.157647	1	0.308993	1	1.21507e-08	0.102429	0.999992	0.0507259	1	0.0874477	0.0802008	0.0711657	FALSE
Ehd2	0.124432	1	-0.00765157	1	0.0209673	1	0.155252	7.69925e-09	0.0911574	1	-0.0429815	1	0.204281	5.90107e-07	0.0778758	1	-0.0495789	1	0.109227	1	0.290209	1	0.0963073	1	0.248191	1	0.142466	1	-0.257978	1	2.55095e-10	0.168277	1	0.118811	1	-0.0466528	0.080145	0.216673	FALSE
Ddah2	-0.00490764	1	0.240904	1.86544e-05	-0.0776218	1	0.0749237	1	0.0970997	1	-0.072006	1	-0.0072463	1	0.0919077	1	-0.0517368	1	-0.114871	1	0.365718	1	0.0746118	1	0.0850434	1	0.211707	1	0.288457	1	1	0.00658855	0.0162717	0.201467	1	0.0323408	0.0801322	0.090207	FALSE
Zmat2	0.0918949	1	0.0152055	1	0.0748383	1	0.121032	0.000163846	-0.0342192	1	0.0960281	1	0.207682	4.46976e-09	0.0778928	1	0.0828718	1	0.143685	1	-0.0146513	1	0.158243	1	0.176906	1	-0.0414627	1	0.045641	1	2.15725e-08	0.14824	1	0.000553008	1	0.0915244	0.0801059	0.0667384	FALSE
Dhx36	0.013336	1	-0.00495176	1	0.00668201	1	0.111432	1	0.00917241	1	0.0763056	1	0.140296	0.0305297	0.00895213	1	0.107715	1	0.187462	1	-0.0912923	1	0.202785	1	0.165033	1	0.0941639	1	0.17438	1	0.72751	0.123512	1	0.00320887	1	0.113573	0.080098	0.0561644	FALSE
Rpn1	0.187579	1	0.0932546	1	0.160609	1	0.108705	1	0.0170594	1	0.106004	1	0.111745	1	0.0245248	1	0.0366662	1	0.150419	1	0.0157437	1	0.0115739	1	0.130718	1	0.0160696	1	0.0304716	1	1	0.137833	1	0.0333304	1	0.069065	0.0800762	-0.0239142	FALSE
Ccnl2	0.1112	1	0.0663356	1	0.0197197	1	0.0474326	1	0.0675891	1	0.0168802	1	0.0083519	1	0.0388735	1	0.0857866	1	0.0717187	1	-0.072505	1	0.0803797	1	0.0805889	1	0.18993	1	0.388521	1	1	0.0638584	1	0.0580446	1	0.118257	0.0800535	0.0161873	FALSE
Tfe3	0.0574546	1	0.0730563	1	0.0571143	1	0.0458283	1	0.0558109	1	0.0654357	1	0.0727217	1	0.0216311	1	0.10943	1	0.00896207	1	0.109518	1	0.015447	1	0.221791	1	0.0955984	1	0.190754	1	1	0.0813515	1	0.0711229	1	0.0876362	0.0800369	0.0735384	FALSE
Mier1	0.141706	1	0.128958	1	0.151991	1	0.0679943	1	0.0551037	1	0.112362	1	0.0673282	1	0.0537063	1	0.0626218	1	0.306077	1	0.133049	1	0.0472634	1	0.0983345	1	-0.16958	1	-0.0582394	1	1	0.136288	1	0.0402475	1	0.0631997	0.0799118	0.0830564	FALSE
Ppme1	0.104666	1	0.0479203	1	0.142983	1	0.0506851	1	0.0164901	1	0.103872	1	0.0205862	1	0.0510424	1	0.0850454	1	0.0523557	1	0.0906832	1	0.06963	1	0.162139	1	0.0657384	1	0.134388	1	1	0.0780863	1	0.0543749	1	0.107184	0.0798817	0.0567447	FALSE
Lrif1	0.0712225	1	0.0585673	1	0.0860239	1	0.0540583	1	0.123965	0.856226	0.111771	1	0.0514957	1	0.104941	0.0223137	0.103821	1	-0.083796	1	0.0546986	1	0.00909225	1	0.118809	1	0.114071	1	0.218473	1	1	0.042358	0.637085	0.0912485	1	0.105836	0.0798142	0.0841404	FALSE
Frmd6	0.0650896	1	0.0974484	1	0.0463898	1	0.116025	0.0854371	0.0803862	1	0.126067	1	0.0747004	1	0.0421985	1	0.136217	1	-0.0679217	1	0.0740319	1	0.084609	1	-0.00905075	1	0.0554941	1	0.270706	1	0.896461	0.0357686	1	0.0699118	1	0.132798	0.0794928	0.0359647	FALSE
Sec63	0.123371	1	0.0239324	1	0.0719047	1	0.0853094	0.594694	0.00527052	1	0.0897126	1	0.130711	0.0146093	0.0356693	1	-0.0556512	1	0.150502	1	0.195252	1	0.119902	1	0.229119	1	-0.0834033	1	0.0699585	1	0.486168	0.143802	1	0.0353442	1	0.0591654	0.0794373	0.0919165	FALSE
Hmox1	0.0981025	1	0.0836925	1	0.212116	1	0.124013	1	0.071917	1	0.250101	1	-0.0520421	1	-0.0324027	1	0.128894	1	0.102097	1	-0.314741	1	0.186289	1	0.284061	1	0.0756279	1	-0.0265307	1	1	0.111246	1	-0.0231813	1	0.150174	0.0794129	-0.0146293	FALSE
Rap2b	0.080949	1	0.0374584	1	0.0483988	1	0.021575	1	0.031467	1	0.0372083	1	0.0661921	1	0.101138	0.0118148	0.0592356	1	0.0737233	1	0.0706932	1	0.175591	1	0.112081	1	0.213305	1	0.0618185	1	1	0.0709041	0.543833	0.0908122	1	0.0764505	0.0793889	0.0618808	FALSE
Tmed10	0.173737	1	0.070663	1	0.14821	1	0.101914	0.005565	0.0191266	1	0.0478661	1	0.137548	0.445446	0.0304689	1	0.0672762	1	0.0266106	1	0.176491	1	0.116228	1	0.00234338	1	0.0787779	1	-0.00847801	1	0.285065	0.0884306	1	0.0751054	1	0.0742205	0.0792522	0.107495	FALSE
Spty2d1	0.043955	1	-0.017806	1	0.109919	1	0.0864075	0.204547	0.0569922	1	0.0884257	1	0.0647522	1	0.0896298	1	0.104949	1	-0.00704434	1	0.183124	1	0.110113	1	0.181718	1	0.121191	1	-0.0281684	1	0.97703	0.0739578	1	0.0866263	1	0.0770476	0.0792106	0.00376967	FALSE
Ctnnd1	0.0429705	1	0.123754	0.00355642	0.00555093	1	0.0621343	1	0.105197	1	0.0529563	1	0.0562594	1	0.120575	1.3121e-05	0.132583	1	-0.051826	1	0.0673396	1	0.0857213	1	0.0529246	1	0.153777	1	0.178087	1	1	0.0324926	0.000202757	0.114129	1	0.0909797	0.0792003	0.0587398	FALSE
Fer	0.0411686	1	0.126754	0.0323151	0.096309	1	0.0415243	1	-0.00575064	1	0.0528088	1	0.0495762	1	0.0700601	0.443837	0.0503976	1	0.111281	1	0.0988332	1	0.194054	1	0.102595	1	0.0234938	1	0.133845	1	1	0.069229	0.581182	0.0626781	1	0.105483	0.07913	0.10331	FALSE
Ndufb4	0.0207596	1	-0.0644202	1	-0.00232896	1	-0.00127339	1	0.015397	1	-0.00686269	1	0.00675978	1	0.0770088	1	0.039301	1	0.313039	1	0.482321	1	0.179058	1	0.0531707	1	0.0192814	1	0.0547613	1	1	0.0784911	1	0.105918	1	0.0527857	0.0790648	-0.135033	FALSE
Galnt1	0.107806	1	0.066626	1	0.0670448	1	0.00376692	1	0.0608053	1	0.0676691	1	-0.00221004	1	0.06009	1	-0.0873878	1	0.115311	1	0.0520343	1	0.0774367	1	0.31653	1	0.143189	1	0.136035	1	1	0.108241	1	0.0765488	1	0.0521596	0.0789831	0.0547261	FALSE
Dctn1	0.134764	1	0.087476	0.0603733	0.0395821	1	0.0917734	0.00311002	0.0435416	1	0.0178886	1	0.131674	0.00624505	0.06397	1	0.0637476	1	0.187532	1	0.219165	1	0.0517554	1	0.0457642	1	0.0593722	1	-0.0551698	1	0.0167182	0.118302	0.846552	0.094705	1	0.0235608	0.0788558	0.0596798	FALSE
Kif1b	0.163242	1	0.104149	0.573401	0.0738269	1	0.0859039	1	0.0892259	1	0.0407845	1	0.104145	0.28316	0.0689701	1	0.0318645	1	0.251324	1	-0.073088	1	0.0552595	1	0.15353	1	-0.0239191	1	0.0565119	1	0.990529	0.151629	0.99972	0.0330676	1	0.0516495	0.078782	0.0983905	FALSE
Dtx3l	0.0198181	1	0.0372137	1	0.0908549	1	0.0612116	1	0.0529554	1	0.13393	1	0.0592364	1	0.070587	1	0.11707	1	0.073546	1	0.213799	1	0.0627924	1	-0.0621681	1	0.0601531	1	0.190316	1	1	0.0303288	1	0.0869417	1	0.118993	0.0787544	0.0946437	FALSE
Tcf25	0.0814989	1	-0.159031	0.187614	0.192988	1	0.110656	0.000210013	0.0622901	1	0.143165	1	0.214417	5.45705e-11	0.0424217	1	0.12122	1	0.155838	1	-0.0695061	1	0.0109879	1	0.0498585	1	-0.0611468	1	0.285566	1	5.7646e-10	0.122454	0.972048	-0.0369944	1	0.150785	0.0787481	-0.0188889	FALSE
Nap1l1	0.107008	1	0.0842226	1	0.0945012	1	0.103113	0.0334054	0.0611192	1	0.0656704	1	0.0525643	1	-0.0223625	1	0.0766099	1	0.161988	1	0.137539	1	0.10777	1	0.150669	1	-0.0438127	1	0.0445766	1	0.744361	0.115069	1	0.0433412	1	0.0778255	0.0787451	0.07733	FALSE
Cryz	0.0585391	1	0.0573401	1	0.0790017	1	0.0796248	0.0559557	0.0933373	1	0.0508816	1	0.138064	7.55056e-05	0.0685912	1	0.046641	1	0.050047	1	0.093527	1	-0.0182028	1	0.0448746	1	0.200351	1	0.137589	1	0.00584213	0.0742298	1	0.102629	1	0.059182	0.0786804	0.0408559	FALSE
Uggt1	0.106632	1	0.108938	0.652043	0.12578	1	0.014186	1	0.0384543	1	-0.00331571	1	0.0373249	1	0.026283	1	0.0596397	1	0.217204	1	0.180805	1	0.0423856	1	0.0103273	1	0.0271765	1	0.186856	1	1	0.0771348	0.999916	0.0763315	1	0.0822693	0.0785785	0.0686135	FALSE
Cryzl1	0.118966	1	0.0582062	1	0.0834149	1	0.0615387	1	0.0420948	1	0.0835884	1	0.106394	0.308017	0.0812879	1	0.0829089	1	0.141189	1	0.0544581	1	0.156436	1	0.15801	1	0.072343	1	-0.12271	1	0.992822	0.11722	1	0.061678	1	0.0567276	0.0785417	0.0566536	FALSE
Os9	0.0420002	1	0.00921712	1	0.00431295	1	0.0755617	0.169719	0.0126645	1	0.0746177	1	0.139334	1.08642e-06	0.0303942	1	-0.00162561	1	0.253642	1	0.0734529	1	-0.0303838	1	0.114741	1	0.111745	1	0.266423	1	0.000583947	0.125056	1	0.0474947	1	0.0626689	0.0784065	0.0883975	FALSE
Nfx1	0.122923	1	0.0615014	1	0.139704	1	0.0523834	1	0.0399439	1	0.0948872	1	0.0739987	1	0.0350645	1	0.161202	1	0.0468755	1	0.00360777	1	0.246685	1	0.117074	1	-0.122772	1	0.10283	1	1	0.082651	1	0.00346906	1	0.149061	0.0783938	-0.00926814	FALSE
Ptprs	-0.00354183	1	0.129769	0.00254182	0.0291668	1	0.0793179	0.730937	0.0910872	1	-0.0108404	1	0.0905166	1	0.0357168	1	0.0674602	1	0.565858	1	0.0979053	1	0.170688	1	0.143903	1	-0.0891491	1	-0.222198	1	0.999981	0.175211	0.288434	0.0530657	1	0.00685531	0.0783773	0.0800639	FALSE
Eif4g3	0.175312	1	0.110736	1	0.107818	1	0.0514053	1	-0.00996802	1	0.0806301	1	0.0905229	0.900401	0.0598487	1	0.0569955	1	0.265687	1	0.0286172	1	0.137431	1	-0.01713	1	0.0625539	1	-0.025853	1	1	0.113159	1	0.0503576	1	0.0714042	0.0783071	0.0791591	FALSE
Hist1h1b	0.361507	1	0.224382	1	0.0629555	1	0.30208	1	-0.0266175	1	-0.0782381	1	0.170888	1	0.115636	1	0.210976	1	0.0846178	1	0.416903	1	-0.0496971	1	0.0947142	1	-0.243383	1	-0.473629	1	1	0.202761	1	0.0973841	1	-0.0655267	0.0782063	0.192766	FALSE
Ahnak2	0.118458	1	-0.0436304	1	-0.0271956	1	0.270646	2.38222e-07	0.0375991	1	0.0600658	1	0.182806	0.124933	0.0317933	1	0.0377501	1	0.217858	1	0.239237	1	-0.0938382	1	0.230103	1	-0.0139569	1	-0.0750254	1	0.000142684	0.203974	1	0.0502084	1	-0.0196487	0.078178	0.192966	FALSE
Capza1	0.114214	1	0.0303425	1	0.122153	1	0.0997861	0.0743072	0.0952665	1	0.0511748	1	0.0789103	1	0.0781049	1	0.0176646	1	0.0589084	1	-0.161948	1	0.0816387	1	0.316369	1	0.0305993	1	0.157899	1	0.877487	0.133638	1	0.0144731	1	0.086106	0.0780722	0.0433487	FALSE
Metap2	0.199862	1	-0.0546983	1	0.1567	1	0.132589	1.11265e-05	0.00236899	1	0.14	1	0.135716	0.00598221	0.0354915	1	0.103286	1	0.0327191	1	0.058155	1	0.0487717	1	0.0732604	1	0.000904877	1	0.104847	1	0.000267135	0.114829	1	0.0084444	1	0.110721	0.0779982	-0.0763989	FALSE
Abca1	0.032689	1	0.0142115	1	0.0212151	1	0.115135	6.61492e-07	0.0933988	1	0.0872769	1	0.0992373	0.00447392	0.0829257	0.0620568	0.0464115	1	0.0097763	1	0.0543057	1	0.102083	1	0.219193	1	0.0631234	1	0.126352	1	2.27081e-05	0.095206	0.850823	0.061593	1	0.0766677	0.0778223	0.0569966	FALSE
Kidins220	0.00894974	1	0.0233888	1	0.0238956	1	0.129809	0.000731256	0.172085	0.010511	0.103331	1	0.0489931	1	0.0643877	1	0.0242492	1	-0.0500253	1	0.230258	1	0.0983362	1	0.155026	1	0.144236	1	-0.00984006	1	0.153789	0.0585503	0.521634	0.126871	1	0.0479944	0.0778053	0.0679586	FALSE
Exosc7	-0.0280022	1	-0.0251972	1	0.0424423	1	0.00878536	1	0.0117293	1	0.0218782	1	0.0686028	1	0.0584241	1	0.0496725	1	0.22193	1	0.109035	1	0.0416657	1	0.186508	1	0.0631636	1	0.336194	1	1	0.0915648	1	0.0434309	1	0.0983705	0.0777887	0.133232	FALSE
Mga	0.0578172	1	0.0878161	1	0.044614	1	0.0465802	1	0.0797159	1	0.0594922	1	0.0159317	1	0.0323705	1	0.027797	1	0.0715528	1	0.163411	1	0.0368227	1	0.144682	1	0.110572	1	0.187112	1	1	0.0673128	1	0.0947769	1	0.0711675	0.0777524	0.0467044	FALSE
Mipol1	0.0836825	1	0.0654542	1	0.00606065	1	0.0415982	1	0.0881979	1	0.0960459	1	0.0668082	1	0.03527	1	0.102316	1	0.0508701	1	0.0304621	1	0.113967	1	0.0562913	1	0.183067	1	0.141498	1	1	0.0598501	1	0.0804903	1	0.0919775	0.0774393	0.0414639	FALSE
Rab10	0.0468184	1	0.0552161	1	0.130481	1	0.0207392	1	0.0559678	1	0.088394	1	0.0856907	1	0.100881	0.913045	0.0872263	1	0.0078855	1	0.177692	1	0.092595	1	-0.0141335	1	0.127399	1	0.0950883	1	1	0.0294	1	0.103431	1	0.098757	0.077196	0.079322	FALSE
Fgfr1op2	0.0880561	1	0.0163619	1	0.0872482	1	0.0754356	1	0.042366	1	0.0690372	1	0.140941	0.00594806	0.0606095	1	0.0857374	1	0.229082	1	0.167303	1	-0.0334789	1	0.134917	1	-0.00630664	1	-0.000493393	1	0.418894	0.133687	1	0.0560667	1	0.0416101	0.0771211	0.124644	FALSE
Ubn2	0.0923816	1	0.0896993	1	0.102588	1	0.0628008	1	0.0843945	1	0.0460787	1	0.079781	1	0.125092	0.133938	0.0990078	1	-0.0141893	1	0.0797258	1	0.0668666	1	0.147258	1	0.0102656	1	0.0848907	1	1	0.0736064	0.946406	0.0778355	1	0.0798864	0.0771094	0.10006	FALSE
B4galt1	0.103812	1	0.0900208	1	0.0511941	1	0.0240395	1	0.0781157	1	0.0492578	1	0.0767816	1	0.0677023	1	0.0224918	1	0.0825627	1	0.0541688	1	0.0592205	1	0.211083	1	0.0795982	1	0.106202	1	1	0.0996558	1	0.0739212	1	0.0576733	0.0770834	0.0410514	FALSE
Gnaq	0.0616108	1	0.0830458	1	0.031368	1	0.0303817	1	0.0214892	1	-0.0142251	1	0.0688601	1	0.08062	1	0.080527	1	0.161837	1	0.209359	1	0.0528233	1	0.0443351	1	0.0857871	1	0.158356	1	1	0.073405	1	0.0960602	1	0.0617698	0.0770783	0.0656107	FALSE
Akap13	0.0477779	1	-0.0210007	1	-0.00962475	1	0.0886768	1	0.104442	1	0.0362627	1	0.0774001	1	0.0316389	1	0.0137345	1	-0.0530694	1	0.446598	0.0193883	0.0689732	1	0.157997	1	0.0373578	1	0.127844	1	1	0.0637565	0.639955	0.119807	1	0.047438	0.0770006	0.0396478	FALSE
Prkar1a	0.16481	0.677069	0.0148383	1	0.0685574	1	0.13018	0.000503917	0.113634	1	0.0770202	1	0.160439	4.30519e-05	0.0318694	1	-0.0288764	1	0.021359	1	0.345284	1	0.0912784	1	0.205151	1	-0.108244	1	-0.135286	1	8.17992e-05	0.136388	1	0.0794764	1	0.0145386	0.0768009	0.0939148	FALSE
Ddx50	0.0929479	1	0.0607725	1	0.10089	1	0.09732	0.234795	0.062913	1	0.00995185	1	0.137668	0.00513981	0.036329	1	0.0811981	1	0.00486429	1	0.144106	1	0.16157	1	0.23974	1	0.00406429	1	-0.083416	1	0.200123	0.114508	1	0.0616369	1	0.0540388	0.0767279	0.117456	FALSE
Hk1	0.133721	1	0.0497388	1	0.142757	1	0.103493	5.04372e-06	0.117603	1	0.134806	1	0.127209	0.0900041	0.0274707	1	0.0578104	1	-0.142475	1	-0.0441587	1	0.0152293	1	-0.00803106	1	0.154635	1	0.280028	1	0.0011519	0.0427833	1	0.0610577	1	0.126126	0.0766557	0.0314248	FALSE
Cdc40	0.0581972	1	0.0251822	1	0.058704	1	0.073713	1	0.070704	1	0.0926142	1	0.0828693	1	-0.00640594	1	0.0859327	1	0.101191	1	0.206546	1	0.154834	1	0.00101664	1	0.108263	1	0.0362448	1	1	0.0633973	1	0.0808578	1	0.0856659	0.0766403	0.0903761	FALSE
Abce1	0.0615839	1	0.129241	0.581498	0.121584	1	0.0223101	1	0.0373548	1	0.0733778	1	0.0498443	1	0.0295405	1	0.0427519	1	0.108741	1	0.149622	1	0.0733323	1	0.112604	1	0.071917	1	0.0657005	1	1	0.0710167	0.999751	0.0835349	1	0.0753492	0.0766336	0.0292505	FALSE
Kat6a	0.0504425	1	0.060457	1	0.0243906	1	0.0361799	1	0.00303912	1	0.0382875	1	0.0813681	1	0.0503109	1	0.0565175	1	-0.0683526	1	0.213563	1	0.154203	1	0.187559	1	0.0963363	1	0.163889	1	1	0.0574393	1	0.0847413	1	0.0874574	0.076546	0.0377511	FALSE
Irf2bpl	0.0891427	1	0.130292	0.116973	0.066757	1	0.0927363	0.582721	0.0650865	1	-0.00323887	1	0.0449927	1	0.0711929	1	0.0379439	1	-0.00477067	1	0.202066	1	0.0295946	1	0.00414541	1	0.18597	1	0.133292	1	0.999755	0.0452493	0.933234	0.130922	1	0.0528698	0.0763469	0.063587	FALSE
Ftl1	0.12003	1	0.238594	8.80331e-06	0.107679	1	0.0423322	1	-0.00674368	1	-0.0457493	1	-0.0351985	1	0.0913277	1	0.0690849	1	0.266915	1	0.0476624	1	0.120118	1	0.0100844	1	0.0784318	1	0.0394491	1	1	0.0808326	0.00975635	0.0898545	1	0.0581164	0.0762678	0.113309	FALSE
Fubp1	0.140694	1	0.0731457	1	0.177327	1	0.0701099	1	0.120712	1	0.037184	1	0.0542292	1	0.0713406	1	0.0703456	1	-0.142228	1	-0.0946376	1	0.125607	1	0.166718	1	0.0818499	1	0.191423	1	1	0.0579045	1	0.0504821	1	0.120377	0.0762547	0.0807834	FALSE
Lrrfip1	0.0561362	1	-0.0115769	1	0.0859771	1	-0.016029	1	-0.0212125	1	0.140741	1	0.061088	1	0.00967626	1	0.139714	1	0.23624	1	0.00423624	1	0.163512	1	-0.00759498	1	-0.17024	1	0.472783	1	1	0.0659681	1	-0.0378233	1	0.200545	0.07623	0.0850755	FALSE
Phf21a	-0.0292137	1	0.0603612	0.0950429	0.00359555	1	0.0815537	0.00121854	0.0791179	1	0.142084	1	0.0432474	1	0.0764495	1	0.0165203	1	0.0903895	1	0.0911687	1	0.0695355	1	0.111007	1	0.152254	1	0.155303	1	0.201117	0.0593967	0.909881	0.0918703	1	0.0774077	0.0762249	0.0755744	FALSE
Irf2bp2	0.0980257	1	0.122745	1	0.0740425	1	0.031075	1	0.0336241	1	-0.0682982	1	0.161087	1.57411e-05	0.17383	6.02745e-05	0.104259	1	0.2512	1	-0.0839397	1	0.0128352	1	-0.0237366	1	0.160199	1	0.0962758	1	0.0145123	0.10353	0.0350931	0.0812916	1	0.0438229	0.0762149	0.07541	FALSE
Hadh	0.0844997	1	-0.0267846	1	0.019217	1	0.129101	4.64777e-05	0.139276	0.367382	0.0334931	1	0.120568	0.0391681	0.0790556	1	0.0702085	1	-0.00643347	1	-0.00444103	1	-0.0965431	1	0.170515	1	0.155722	1	0.274872	1	0.00319962	0.09965	0.996319	0.0685656	1	0.0602496	0.0761551	0.140419	FALSE
Flywch2	0.112486	1	0.107812	0.00173633	0.134268	1	0.0670791	0.419385	0.0601028	1	-0.00353971	1	0.0249891	1	0.0157198	1	0.0377276	1	0.29249	1	0.165268	1	-0.023507	1	0.0935105	1	0.0250168	1	0.0324946	1	0.997983	0.118111	0.240225	0.0747838	1	0.0354886	0.0761278	0.0713392	FALSE
Anapc11	0.0793732	1	0.0735254	1	0.0748632	1	0.0696509	1	0.121877	1	0.0717192	1	0.0850215	1	0.0985538	1	0.0346857	1	0.173196	1	0.18953	1	0.0602877	1	0.0421456	1	-0.0503011	1	0.0173289	1	1	0.0898775	1	0.0866369	1	0.0517769	0.0760971	0.111207	FALSE
Phtf1	0.140066	0.357988	0.0489677	1	0.0686386	1	0.0694222	1	-0.000459688	1	0.035024	1	0.0550661	1	0.0581788	1	0.0435715	1	0.12423	1	0.125808	1	0.162751	1	0.210452	1	-0.0129298	1	0.0122798	1	0.995905	0.119847	1	0.043913	1	0.0644529	0.076071	0.0502553	FALSE
Cdc42bpa	0.0244954	1	0.0532166	1	0.139744	1	0.0260468	1	0.088023	1	-0.00686953	1	0.0944668	1	0.119589	0.503374	-9.30712e-05	1	0.149448	1	-0.101005	1	-0.0690719	1	0.248622	1	0.14491	1	0.229176	1	1	0.108616	0.99928	0.0609467	1	0.0585771	0.0760465	0.017205	FALSE
Nsd2	0.177096	1	0.122967	1	0.176757	1	0.0208587	1	0.0553667	1	0.0768524	1	0.0494495	1	-0.0243062	1	0.0559964	1	-0.0632172	1	0.14966	1	0.317568	1	0.00787217	1	-0.0342345	1	0.051532	1	1	0.0384118	1	0.0538905	1	0.135741	0.0760145	0.0363792	FALSE
Emp2	0.0426509	1	-0.036628	1	0.116478	1	0.161441	0.00284357	0.127049	1	0.125259	1	0.210937	3.05526e-05	0.126166	0.0269535	-0.0270722	1	0.115687	1	0.102771	1	-0.0604717	1	0.20545	1	-0.0117741	1	-0.0584315	1	0.000328175	0.147233	0.703828	0.0615168	1	0.0191523	0.0759674	0.0357669	FALSE
Dmtf1	0.103537	1	0.139101	0.000101857	0.121381	1	0.0900067	0.0438168	0.159577	0.00126575	0.0747411	1	0.0361001	1	0.108118	0.0400069	0.0776909	1	0.0103228	1	-0.0148765	1	0.00840266	1	0.073413	1	0.0354119	1	0.115489	1	0.793362	0.0626758	3.55153e-05	0.0854664	1	0.0795409	0.0758944	0.0309823	FALSE
Tes	0.146474	1	0.0493593	1	0.0731285	1	0.0481891	1	0.0587624	1	0.0878286	1	0.0518052	1	0.103576	1	0.09449	1	0.139863	1	0.342774	1	0.0668634	1	-0.0465637	1	0.0317763	1	-0.112762	1	1	0.0679534	1	0.11725	1	0.0419097	0.0757043	0.0766559	FALSE
Ankrd44	-0.000779003	1	0.00742506	1	0.0583847	1	0.0516703	1	0.103583	1	0.119891	1	0.0496391	1	0.0496246	1	0.0726515	1	0.130583	1	0.0970772	1	0.0519537	1	0.141885	1	0.11728	1	0.0844381	1	1	0.0745997	1	0.0749979	1	0.0774637	0.0756871	0.0879781	FALSE
Eva1c	0.13704	1	-0.0295806	1	0.108212	1	0.117203	0.000192781	0.0154617	1	-0.0456465	1	0.130079	0.00251462	0.0534256	1	0.0121883	1	0.272131	1	0.101291	1	-0.0130214	1	0.291149	1	0.0808917	1	-0.0960082	1	0.00120979	0.18952	1	0.0442979	1	-0.00685515	0.0756544	0.129574	FALSE
Mapk6	0.0614336	1	0.103866	1	0.147545	1	0.0537342	1	0.000536262	1	0.229209	1	0.0520412	1	0.0833972	1	0.147016	1	0.152917	1	0.0360984	1	0.0937595	1	-0.130484	1	-0.00769289	1	0.111403	1	1	0.0379284	1	0.043241	1	0.145787	0.075652	0.00444719	FALSE
Slc39a13	0.00577512	1	0.0750834	1	0.0948606	1	0.0933617	0.560794	0.111678	1	0.0312845	1	0.0496601	1	0.0884913	1	0.0730372	1	-0.0155397	1	-0.0569362	1	0.0018228	1	0.211199	1	0.0146637	1	0.355768	1	0.999666	0.0688913	1	0.0465961	1	0.111355	0.075614	0.0832296	FALSE
Asph	0.213586	0.0399051	0.111657	0.230304	0.0776017	1	0.0470268	1	-0.0387065	1	0.0209726	1	0.0644562	1	0.0171171	1	0.0669097	1	0.140979	1	0.107897	1	0.0931861	1	-0.0109886	1	0.122799	1	0.098588	1	0.776818	0.0910118	0.982874	0.0641527	1	0.0714516	0.0755387	0.0891821	FALSE
Nes	0.147326	1	0.463205	6.06944e-30	0.0980924	1	0.0824532	1	0.14538	1	-0.0144789	1	0.0086371	1	0.035267	1	-0.0177707	1	-0.0184711	1	0.014259	1	0.0784234	1	-0.0412705	1	0.0723738	1	0.0789322	1	1	0.035735	5.5022e-24	0.146097	1	0.0446397	0.0754905	0.0707921	FALSE
Fem1b	0.0184249	1	0.0442057	1	0.02615	1	0.0330669	1	0.00965016	1	0.0596086	1	0.0396073	1	0.0457046	1	0.0118034	1	0.240352	1	0.110473	1	0.043169	1	0.220882	1	0.128947	1	0.100163	1	1	0.110467	1	0.0677962	1	0.0481787	0.0754805	0.0933641	FALSE
Senp7	0.0816316	1	0.0392574	1	0.0136859	1	0.0846471	1.34965e-05	0.0240154	1	-0.00750038	1	0.0590508	1	0.0614542	1	0.00999549	1	0.2032	1	0.151286	1	0.0678739	1	0.0975165	1	0.143325	1	0.102535	1	0.0130748	0.105209	1	0.0838677	1	0.0373181	0.075465	0.0566433	FALSE
Aak1	0.0731405	1	0.0319618	1	0.0676492	1	0.0731916	1	0.0148927	1	0.047377	1	0.0820991	0.557876	0.0926888	0.0135213	0.107813	1	0.120946	1	0.0328882	1	0.0824582	1	0.0662721	1	0.0563057	1	0.181726	1	0.999652	0.0831298	0.569764	0.0457474	1	0.0974047	0.0754273	0.0682682	FALSE
Usp34	0.166647	1	0.13519	0.598563	0.11148	1	0.108789	0.171253	0.0497268	1	0.0338645	1	0.143464	0.0186418	0.0343684	1	-0.00387481	1	0.0354625	1	0.0846349	1	0.0601658	1	0.153121	1	-0.0500493	1	0.0679101	1	0.320352	0.121497	0.999806	0.0507742	1	0.0539092	0.0753934	0.0711906	FALSE
Huwe1	-0.046062	1	0.0697858	1	0.0537911	1	0.0157515	1	-0.0479162	1	0.0230811	1	0.0949207	1	-0.0208364	1	0.0480102	1	0.17676	1	0.309774	1	0.156961	1	0.155034	1	0.136676	1	0.00438638	1	1	0.079281	1	0.0894966	1	0.0572459	0.0753412	0.0748007	FALSE
Iars	0.0452029	1	0.140496	0.0288238	0.0892726	1	0.0511101	1	0.140849	1	0.107659	1	0.0526502	1	0.103963	1	0.0819712	1	0.0536104	1	0.132272	1	0.0462075	1	0.0483598	1	0.101223	1	-0.0647403	1	1	0.0501867	0.716627	0.123761	1	0.052074	0.0753405	0.0568729	FALSE
Wisp1	0.0163104	1	0.090328	1	-0.0286985	1	0.0328853	1	0.138264	1	-0.0373924	1	0.0276399	1	0.14564	0.00204012	-0.0358838	1	-0.0274724	1	0.180589	1	-0.0370128	1	0.177873	1	0.331455	1	0.15469	1	1	0.0454471	0.259835	0.177255	1	0.00314056	0.0752809	0.107127	FALSE
Cct2	0.166025	0.794677	0.125211	0.0371884	0.166605	0.443689	0.0517597	1	0.0525416	1	0.0502748	1	0.00912696	1	-0.020734	1	0.00358431	1	0.0308159	1	0.140917	1	0.196761	1	-0.0569018	1	0.0590365	1	0.153844	1	0.999996	0.0401652	0.764091	0.0713944	0.998489	0.114214	0.0752578	0.0957001	FALSE
Abcc1	0.0563208	1	0.0526701	1	0.0525637	1	0.110919	6.36211e-07	0.108472	0.707761	0.083339	1	0.0797252	1	0.0523649	1	0.0927607	1	0.104846	1	-0.0732554	1	0.0428533	1	0.1587	1	0.172035	1	0.0343478	1	0.00148097	0.102102	0.999969	0.0624573	1	0.0611729	0.0752441	0.0221608	FALSE
Prkg2	0.0186781	1	0.0766541	1	0.124983	1	0.100883	1	0.192914	1	0.00150819	1	0.200876	5.86553e-05	0.136781	0.0275134	0.109742	1	-0.279164	1	-0.141318	1	-0.0288721	1	0.341195	1	0.0576567	1	0.213129	1	0.0344883	0.0764938	0.707761	0.0645376	1	0.0840981	0.0750432	0.0905745	FALSE
Mark3	0.203554	1	0.104637	1	0.11581	1	0.0917569	0.278301	0.0630196	1	-0.0122555	1	0.0942267	1	0.0225102	1	0.0586315	1	-0.0545176	1	0.157127	1	0.0851416	1	0.039826	1	0.0918613	1	0.0628044	1	0.990002	0.0749693	1	0.0878309	1	0.0620263	0.0749422	0.0587427	FALSE
Trim56	0.0582945	1	0.11534	0.000225276	0.099727	1	0.0434726	1	0.0364351	1	0.0510915	1	0.0238723	1	0.095865	0.00346758	0.0720378	1	0.0978429	1	0.0496367	1	0.060046	1	0.0319073	1	0.114264	1	0.172566	1	1	0.0510779	0.00172392	0.082308	1	0.0910937	0.0748266	0.0674863	FALSE
Gjb3	0.0733893	1	0.490693	4.67205e-12	0.162606	1	-0.0924521	1	-0.0153625	1	-0.0172994	1	0.0154482	1	0.0100143	1	0.0164064	1	0.243664	1	0.176463	1	0.239499	1	-0.0135678	1	0.0459557	1	-0.214066	1	1	0.0452963	1.05733e-07	0.141553	1	0.0374293	0.0747594	0.119186	FALSE
Mef2a	0.0355684	1	0.0504978	1	0.0599741	1	-0.000650368	1	0.000664611	1	-0.0181025	1	0.0658357	1	0.0817017	1	-0.0022201	1	0.0677979	1	0.174356	1	-0.00649656	1	0.247404	1	0.147468	1	0.216601	1	1	0.0831911	1	0.0909376	1	0.0499513	0.0746933	0.0429675	FALSE
Rps15a	0.0629698	1	0.166932	8.50183e-11	0.176945	0.000477141	0.0204009	1	0.0480907	1	0.212797	4.46042e-10	-0.0230326	1	0.0692281	0.191525	0.190872	3.72701e-23	-0.147698	1	-0.0135281	1	0.0782566	1	-0.026491	1	0.119344	1	0.185119	1	1	-0.0227703	3.05387e-07	0.0780133	1.48269e-29	0.168798	0.0746803	-0.258062	FALSE
Mycbp2	0.141756	1	0.0934515	1	0.0653148	1	0.113352	0.0141755	0.049788	1	0.0955686	1	0.148894	7.94646e-05	0.047576	1	0.0576352	1	-0.0487596	1	0.062542	1	0.0331676	1	0.133254	1	-0.00305128	1	0.129078	1	0.00225629	0.0976994	1	0.0500612	1	0.0761527	0.0746378	0.11295	FALSE
Copb1	0.0947068	1	0.0831496	1	0.123359	1	0.0729545	1	0.0286615	1	-0.0521049	1	0.0724302	1	0.00115858	1	0.0469381	1	0.0549431	1	0.24538	1	0.0311164	1	0.118806	1	0.0607535	1	0.133625	1	1	0.0827681	1	0.0838207	1	0.0565866	0.0743918	0.088227	FALSE
Rbm33	0.160713	0.354859	0.121365	0.105572	0.101442	1	0.0458043	1	0.0262946	1	0.0731557	1	0.0955026	1	0.0422622	1	0.0664779	1	-0.000505927	1	0.0279328	1	-0.113559	1	0.116454	1	0.17029	1	0.180087	1	0.995757	0.0835935	0.922171	0.077629	1	0.0615209	0.0742478	0.0245265	FALSE
Tmx3	0.112947	1	0.103959	0.656342	0.0337958	1	0.00800562	1	0.0114906	1	-0.0159572	1	0.0791476	1	0.054671	1	0.0201478	1	0.0204949	1	0.0995311	1	0.0824936	1	0.291293	1	0.176432	1	0.0351485	1	1	0.102378	0.999922	0.0892167	1	0.0311257	0.07424	0.0624869	FALSE
2610002M06Rik	-0.0434856	1	0.00621915	1	0.0323957	1	0.0129561	1	-0.00444939	1	0.0380891	1	0.0887421	0.362012	0.0551691	1	0.0761931	1	0.11286	1	0.109526	1	0.0629566	1	0.0571733	1	0.23998	1	0.26904	1	0.996088	0.0456492	1	0.081289	1	0.0957349	0.0742244	0.0769054	FALSE
Epb41l2	0.0519222	1	0.166249	5.58799e-06	0.119215	1	0.0802468	0.459291	0.0636535	1	0.0791158	1	0.0360714	1	0.0407079	1	-0.0397816	1	0.141555	1	0.146227	1	0.10791	1	0.136301	1	-0.0744995	1	0.0570411	1	0.99875	0.0892193	0.00711227	0.0684674	1	0.0647001	0.0741289	0.125508	FALSE
Wasl	0.0536697	1	0.12974	0.109091	0.0586802	1	0.025359	1	0.0947303	1	0.0388933	1	0.0529318	1	0.122807	0.152036	0.106219	1	0.0653832	1	0.118922	1	0.0582703	1	0.00795713	1	0.0314567	1	0.146726	1	1	0.0410602	0.609462	0.0995313	1	0.0817576	0.0741163	0.115401	FALSE
Zkscan3	0.0211586	1	0.036973	1	0.133337	1	0.101489	5.46327e-06	0.07994	1	0.0455756	1	0.0432737	1	0.148248	1.66943e-07	0.0418772	1	0.0717627	1	0.190674	1	-0.0158232	1	0.202756	1	0.025946	1	-0.0159799	1	0.00700066	0.088088	0.0005414	0.0963562	1	0.0377973	0.0740805	0.115239	FALSE
Tmem63b	0.0432949	1	0.149512	0.000281742	0.045661	1	0.0374376	1	0.0577178	1	0.0916506	1	0.037381	1	0.111414	0.000754163	0.17071	1	-0.0589634	1	0.110744	1	0.133925	1	0.126733	1	0.144952	1	-0.0921427	1	1	0.0371765	0.000650367	0.114868	1	0.0699606	0.0740017	0.072325	FALSE
Nucks1	0.276035	1	-0.0281157	1	0.168704	1	0.0823379	1	-0.07094	1	-0.000966145	1	0.0627435	1	-0.0605009	1	0.0628008	1	0.294228	1	-0.0764145	1	0.237141	1	0.102083	1	-0.00201546	1	0.0608059	1	1	0.163486	1	-0.0475973	1	0.105697	0.0738618	0.106606	FALSE
Ndufa5	0.0235444	1	-0.132105	1	0.128816	1	0.0075944	1	0.00385666	1	0.0538814	1	0.0591208	1	0.0324609	1	0.151215	0.318423	0.163949	1	0.192243	1	0.106329	1	0.0971495	1	0.0220531	1	0.196053	1	1	0.0702717	1	0.0237018	0.99361	0.127259	0.0737442	-0.118318	FALSE
Yif1b	-0.0265651	1	0.0444629	1	0.104135	1	0.0295144	1	0.039823	1	0.0515873	1	0.105587	1	0.0645402	1	0.0439708	1	0.0522288	1	0.028037	1	0.300005	1	0.0887048	1	0.0157317	1	0.164318	1	1	0.049894	1	0.038519	1	0.132803	0.0737387	0.107151	FALSE
Unc5b	-0.0450863	1	0.0209385	1	-0.059665	1	0.0605946	1	0.179233	0.00521103	0.0515658	1	0.0900381	1	0.128553	0.00138991	0.0685621	1	0.0809185	1	0.0709792	1	0.122157	1	0.087577	1	0.25399	1	-0.00560876	1	1	0.0548084	0.00852324	0.130739	1	0.0354021	0.0736498	0.0337308	FALSE
Sspn	0.0580492	1	-0.000150037	1	-0.0478745	1	0.089735	0.0213377	0.0660944	1	0.00842162	1	0.112787	8.91122e-05	0.0416291	1	0.00902048	1	0.245821	1	0.141788	1	0.122938	1	0.128292	1	0.0783359	1	0.0486949	1	0.00330193	0.126937	1	0.0655394	1	0.0282401	0.0735721	0.0947237	FALSE
Srpk2	0.113753	1	0.082444	1	0.0483469	1	0.0644668	1	0.0424314	1	0.0139412	1	0.0922155	1	0.0456736	1	0.119276	1	-0.0014509	1	-0.0603265	1	-0.0249285	1	0.384923	0.402189	0.169315	1	0.0130569	1	0.997533	0.130782	1	0.0559074	1	0.0339385	0.0735425	0.05725	FALSE
Tmem2	0.0915769	1	0.10329	1	0.0244586	1	0.0527014	1	0.0460006	1	0.00532147	1	0.0471834	1	0.0219376	1	0.0549551	1	0.38501	1	0.0723864	1	0.00863758	1	0.0655209	1	0.0966966	1	0.0273668	1	1	0.128398	1	0.0680622	1	0.0241479	0.0735362	0.087895	FALSE
Wapl	0.122005	1	0.0669703	1	0.0548701	1	0.0599559	1	0.0200652	1	0.034284	1	0.0316289	1	-0.023592	1	0.00802792	1	0.133449	1	0.0418129	1	0.0894347	1	0.130067	1	0.15232	1	0.181178	1	1	0.095421	1	0.0515152	1	0.0735588	0.0734984	0.0763246	FALSE
Tardbp	0.134141	1	0.0927094	0.830214	0.127508	1	0.0415615	1	0.0249655	1	0.124789	1	0.0423705	1	0.00441792	1	0.0187328	1	0.0569785	1	0.0580073	1	0.244249	1	0.0614338	1	0.125691	1	-0.055082	1	1	0.0672971	0.999998	0.0611583	1	0.0920393	0.0734982	0.0327824	FALSE
Aida	0.0959186	1	-0.00471074	1	0.0858346	1	0.0734046	0.577537	-0.0255921	1	0.0605986	1	0.0580984	1	0.0532936	1	0.0538539	1	0.186259	1	0.235485	1	0.147637	1	0.216729	1	0.0970946	1	-0.232309	1	0.999736	0.126082	1	0.0711141	1	0.023123	0.0734396	0.0749707	FALSE
Ap2a2	0.0667862	1	0.0870932	1	0.123717	1	0.165768	6.91498e-12	0.051707	1	0.0736924	1	0.127636	0.0511297	0.0593636	1	0.0435879	1	0.0938183	1	0.201826	1	0.0900259	1	0.0810801	1	-0.0161256	1	-0.149777	1	1.14988e-08	0.107018	1	0.0767729	1	0.0362493	0.0733466	0.0940434	FALSE
Ube4b	0.112079	1	0.0870847	1	0.0822553	1	0.0538236	1	0.00822525	1	0.0449822	1	0.0583576	1	0.0195738	1	0.06023	1	0.167293	1	0.091546	1	-0.0264049	1	0.112064	1	0.109494	1	0.119484	1	1	0.100724	1	0.0631848	1	0.0561092	0.0733392	0.0314333	FALSE
P4ha2	-0.0332932	1	-0.0893195	1	-0.0143933	1	-0.0016776	1	0.0839338	1	0.24718	0.450413	-0.0621358	1	0.0376452	1	0.127869	1	-0.0669729	1	0.0767834	1	0.208453	1	0.0322017	1	0.164156	1	0.38935	1	1	-0.0263756	1	0.0546398	0.998607	0.191692	0.0733187	0.0315874	FALSE
Pard3	0.041071	1	0.0530375	1	0.0619212	1	0.0775831	1	0.0488861	1	-0.0250146	1	0.0844825	0.972707	0.0753423	1	0.0588899	1	0.112032	1	0.1553	1	0.0147621	1	0.30121	1	0.029135	1	0.0097929	1	1	0.123276	1	0.0723402	1	0.0240703	0.0732287	0.0429312	FALSE
Fip1l1	0.0880219	1	0.0971366	1	0.161211	1	0.0608349	1	0.027335	1	0.049108	1	0.0724468	1	0.0471531	1	0.128778	1	-0.00730543	1	-0.0784419	1	-0.0841357	1	0.148072	1	0.109191	1	0.278994	1	1	0.072414	1	0.0404747	1	0.106791	0.0732267	0.0283518	FALSE
Wasf2	0.149227	1	0.0402656	1	0.0293229	1	0.0976253	0.0730463	0.0480488	1	-0.00964356	1	0.0527575	1	0.00692904	1	0.00873288	1	0.218303	1	0.0751877	1	0.109751	1	0.152549	1	0.0221392	1	0.095036	1	0.875057	0.134092	1	0.038514	1	0.0466398	0.0730821	0.0918444	FALSE
Nt5c	-0.0551239	1	-0.103623	1	-0.0991287	1	0.0120093	1	0.0490044	1	-0.00938005	1	0.0375896	1	0.12652	0.131671	0.0431299	1	0.308877	1	0.619394	1	0.0431373	1	0.0183268	1	0.057689	1	0.0476595	1	1	0.0643357	0.944836	0.149797	1	0.00508359	0.0730721	0.107259	FALSE
mt-Nd6	0.0684203	1	0.0990917	1	0.127967	1	0.084795	0.300355	0.0920308	1	0.061635	1	0.108735	0.00454823	0.0643176	0.398587	0.0669087	1	0.052851	1	-0.0215949	1	0.0405188	1	0.0321687	1	0.129139	1	0.0889606	1	0.213155	0.0693939	0.997428	0.0725968	1	0.077198	0.0730629	0.0567988	FALSE
Tm9sf2	0.118322	1	0.0849808	1	0.0272572	1	0.0423129	1	-0.0272749	1	0.00783316	1	0.0974685	1	0.0543917	1	-0.00770209	1	0.123199	1	0.0308978	1	0.157355	1	0.111881	1	0.160865	1	0.112248	1	1	0.0986367	1	0.060772	1	0.0593983	0.0729356	0.0578924	FALSE
Ankrd40	0.00405094	1	0.0393494	1	0.0568386	1	0.0852797	0.117419	0.0943624	1	0.0621517	1	0.119638	2.59579e-06	0.0816259	0.270636	0.097885	1	0.216885	1	0.088155	1	0.023322	1	0.10609	1	0.0395763	1	-0.0216654	1	0.000854306	0.106389	0.989109	0.0686138	1	0.0437064	0.0729029	0.0913479	FALSE
Bcl9	0.0229362	1	0.0557329	1	0.0854834	1	0.0579134	0.0768445	0.0570882	1	0.017439	1	0.0672173	1	0.0487116	1	0.0537012	1	0.287241	1	0.157515	1	0.0300623	1	0.152221	1	0.0135586	1	-0.0138074	1	0.882192	0.117506	1	0.0665213	1	0.0345757	0.0728676	0.0441895	FALSE
Map1s	0.0269924	1	0.0922196	0.421273	0.0473845	1	0.0595458	0.432227	-0.00847312	1	0.0763999	1	0.059455	1	0.0700308	1	0.0592083	1	0.08693	1	-0.00514287	1	0.0985886	1	0.222588	1	0.0820341	1	0.122629	1	0.998267	0.0911022	0.998027	0.0461337	1	0.080842	0.0726926	0.0765579	FALSE
Aup1	0.195356	0.0167329	0.110052	1	0.11297	1	0.0690866	1	0.0517362	1	0.0193174	1	0.0550993	1	0.0498907	1	0.0872983	1	0.177193	1	0.164787	1	-0.0958891	1	0.0898225	1	-0.0703408	1	0.0735477	1	0.611186	0.117311	1	0.061225	1	0.0394489	0.0726618	0.0818869	FALSE
Ube2r2	0.0746406	1	0.0967315	1	0.0584406	1	0.0207942	1	-0.0137024	1	-0.0228349	1	0.0702768	1	0.0416115	1	-0.0617302	1	0.149584	1	0.227081	1	0.055636	1	0.291409	1	0.0875134	1	0.0135236	1	1	0.121341	1	0.087847	1	0.00860703	0.0725983	0.0537905	FALSE
5730559C18Rik	0.0105303	1	0.0504325	1	0.0559671	1	0.0519925	1	0.102221	1	0.0132028	1	0.0849487	0.0369366	0.139164	7.15218e-08	0.116475	1	0.149738	1	0.23658	1	0.0352344	1	0.0152333	1	0.0285704	1	-0.00156538	1	0.762854	0.0624886	0.000282414	0.111394	1	0.0438627	0.0725816	0.0653979	FALSE
Jup	0.0857201	1	0.0497821	1	-0.0235834	1	0.0414601	1	0.0781548	1	-0.0260213	1	0.106984	2.77133e-05	0.0618361	0.132869	-0.00832955	1	0.136638	1	0.110543	1	0.0837803	1	0.0979692	1	0.110798	1	0.182702	1	0.021183	0.0937542	0.945672	0.0822229	1	0.0417097	0.0725623	0.0120533	FALSE
Shmt2	0.148911	1	0.0376649	1	0.210947	1	0.056679	1	0.0526482	1	0.127815	1	0.0229616	1	0.00388143	1	0.0561995	1	0.0930042	1	0.210224	1	0.248287	1	-0.0786831	1	-0.0477618	1	-0.0555351	1	1	0.0485746	1	0.0513313	1	0.117542	0.0724828	0.139058	FALSE
Tmem37	0.223342	0.403624	-0.0650441	1	0.0204555	1	0.10858	0.470809	0.17572	0.210047	-0.0384258	1	0.18701	0.00102863	0.0888156	1	0.0136811	1	0.058136	1	0.278356	1	0.0570247	1	0.183167	1	-0.0681618	1	-0.136783	1	0.072608	0.152047	0.978435	0.0819372	1	-0.0168096	0.0723916	0.15898	FALSE
Syap1	-0.082398	1	-0.016177	1	0.0622385	1	0.0497021	1	0.00195747	1	0.0916868	1	0.148969	4.62199e-05	0.045519	1	0.0927042	1	0.0960921	1	0.135357	1	-0.0429838	1	0.247169	1	0.0790977	1	0.176044	1	0.0295931	0.091907	1	0.0491509	1	0.075938	0.0723319	-0.0407396	FALSE
Nagk	0.061047	1	-0.072467	1	-0.0157078	1	0.0618746	1	0.0324092	1	0.0286753	1	0.123626	0.020358	0.0945668	0.193412	0.0122401	1	0.181884	1	0.301178	1	0.0894392	1	0.306005	1	-0.0748825	1	-0.0460049	1	0.649481	0.146887	0.973874	0.056161	1	0.0137284	0.0722589	0.166947	FALSE
Mplkip	0.107899	1	0.0782098	1	0.0903578	1	0.100496	0.687097	0.0788896	1	0.0493059	1	0.0757834	1	0.125938	0.00135077	0.0283397	1	-0.0178528	1	0.0944121	1	0.0869466	1	0.0542105	1	0.0241201	1	0.105282	1	0.999955	0.0641071	0.211943	0.0803139	1	0.0720465	0.0721558	0.0770369	FALSE
Nedd9	0.0983868	1	0.110292	1	0.0394009	1	0.0313535	1	0.127846	0.899683	0.15162	1	0.108229	1	0.089112	1	0.12294	1	0.0212598	1	0.0896319	1	0.0798342	1	0.0294194	1	0.075511	1	-0.0928529	1	1	0.0577298	1	0.0984787	1	0.0601885	0.0721323	0.0418128	FALSE
Dusp8	0.0697456	1	0.106547	5.16818e-05	0.0830445	1	0.0297049	1	0.0719025	0.20088	0.0265856	1	0.0615528	1	0.0835256	0.039123	0.0828204	1	0.0136878	1	0.121367	1	0.0968645	1	0.0259593	1	0.00947323	1	0.198662	1	1	0.0401301	0.00105993	0.0785631	1	0.0975953	0.0720962	0.065986	FALSE
Col5a1	0.0149633	1	0.16524	0.207459	-0.0145059	1	0.0568105	1	0.0512215	1	-0.0726332	1	0.00151724	1	0.0801088	1	0.0480829	1	0.462926	1	-0.0143887	1	0.0132366	1	0.29932	1	0.00819866	1	-0.0187903	1	1	0.167107	0.977786	0.0580759	1	-0.00892199	0.0720871	0.0503511	FALSE
Aamp	0.0676785	1	-0.0241486	1	0.0947656	1	0.0923864	1	0.0696814	1	0.091218	1	0.122948	0.0652459	0.0150344	1	0.0672374	1	0.191248	1	-0.0875264	1	0.0533544	1	0.196559	1	0.00837571	1	0.122444	1	0.858473	0.134164	1	-0.00371667	1	0.0858039	0.0720837	0.157659	FALSE
Gon4l	0.121509	1	0.104655	1	0.108892	1	0.0975294	0.81097	0.022933	1	0.0063607	1	0.0837349	1	0.00348653	1	0.0575395	1	0.209026	1	0.0634675	1	0.0728448	1	0.0963252	1	0.135071	1	-0.103234	1	0.999997	0.121625	1	0.0659224	1	0.0284807	0.0720094	0.160571	FALSE
Hltf	0.0392746	1	0.0623451	1	0.0545021	1	0.0471863	1	0.0939128	1	0.0701087	1	0.0647508	1	0.0523504	1	0.0727188	1	0.124282	1	0.134584	1	0.0797961	1	0.00485298	1	0.170126	1	0.00828765	1	1	0.0560693	1	0.102664	1	0.0570827	0.0719385	0.082527	FALSE
Serpinb6a	-0.0490549	1	-0.0358768	1	0.0348608	1	0.0390678	1	0.121261	0.9249	0.0425853	1	0.0224159	1	0.146822	0.000393037	-0.10771	1	0.169831	1	0.365445	1	0.0222221	1	0.076649	1	0.160121	1	0.0692808	1	1	0.0517818	0.104324	0.151554	1	0.0122478	0.0718613	0.107356	FALSE
Ier3	-0.126947	1	0.351979	0.100465	0.0738132	1	-0.168139	1	-0.0978446	1	0.114233	1	0.115873	1	0.0511951	1	0.17521	1	-0.246471	1	0.555971	1	0.579109	1	0.0625067	1	-0.192869	1	-0.170747	1	1	-0.0726354	0.916489	0.133686	1	0.154324	0.0717915	0.0221256	FALSE
Myo1e	0.0823739	1	0.026917	1	0.0138864	1	0.0926215	1	0.138141	1	0.0530026	1	0.137403	0.00165065	0.0768278	1	0.10043	1	0.0178579	1	0.142409	1	-0.0291238	1	0.0646189	1	0.00343353	1	0.156056	1	0.234306	0.0789751	1	0.0775458	1	0.0588502	0.0717903	0.0628347	FALSE
Ccdc88a	0.188102	1	0.074174	1	0.109958	1	0.0749841	1	0.0687198	1	0.0141063	1	0.135178	0.0050404	0.0464374	1	0.0296277	1	0.33279	1	0.0317497	1	0.0344046	1	0.109871	1	-0.0592665	1	-0.113986	1	0.391117	0.168185	1	0.0323629	1	0.0148221	0.07179	0.0880297	FALSE
Pcbd2	0.0772895	1	-0.0262396	1	0.114022	1	0.0733031	1	0.080696	1	0.0312131	1	0.17024	1.88042e-05	0.162563	3.16525e-08	0.0731787	1	0.0832599	1	0.0830202	1	0.202826	1	0.0100833	1	0.0368017	1	-0.0955805	1	0.0163593	0.0828352	0.000149739	0.0673683	1	0.0651317	0.0717784	0.104556	FALSE
Slfn9	0.0512971	1	-0.00212929	1	0.100607	1	-0.0111903	1	-0.01704	1	0.24134	1	-0.0444006	1	-0.0562586	1	0.0859266	1	-0.0977319	1	0.0634418	1	0.32313	1	0.00631512	1	-0.0683473	1	0.501514	1	1	-0.0191421	1	-0.0160667	1	0.250504	0.0717649	0.109645	FALSE
Dnm2	0.0687392	1	0.0184744	1	0.0614459	1	0.0713063	1	0.083189	1	0.0949015	1	0.135294	1	0.0748438	1	0.0595323	1	0.0551294	1	0.0453884	1	0.048592	1	0.138615	1	0.061407	1	0.0578554	1	1	0.0938168	1	0.0566605	1	0.0644654	0.0716476	0.0776009	FALSE
Prpf6	0.0102848	1	0.00310113	1	-0.00876692	1	0.106949	0.023088	-0.0382654	1	0.150007	1	0.145063	0.000825344	0.0179087	1	0.105822	1	0.072829	1	0.0545203	1	0.122661	1	0.261351	1	-0.0286138	1	0.0996303	1	0.0165058	0.119295	1	0.00173017	1	0.0938707	0.0716321	0.0183602	FALSE
Kmt5b	0.0763126	1	0.0389429	1	0.0551942	1	0.00617278	1	-0.00766142	1	0.00414463	1	0.120043	0.016367	0.0603802	1	0.0965718	1	0.0092299	1	0.0645101	1	0.0889471	1	0.20159	1	0.225139	1	0.0341943	1	0.606872	0.0826696	1	0.0762621	1	0.0558104	0.0715807	0.0385252	FALSE
Kdm6b	-0.0577789	1	0.110633	1	0.0612129	1	-0.0654345	1	0.0841681	1	0.0401003	1	-0.0282781	1	0.0447025	1	0.0859683	1	0.0108514	1	0.20769	1	0.175434	1	0.185292	1	0.0624284	1	0.156233	1	1	0.0089304	1	0.101924	1	0.10379	0.0715482	-0.0705691	FALSE
Plekhg3	0.0649212	1	0.0737218	1	0.0856246	1	0.0622307	0.0763311	0.0951212	1	0.0100156	1	0.0776164	0.927098	0.0616762	1	0.110327	1	0.0273815	1	0.102995	1	0.010474	1	-0.048871	1	0.138997	1	0.200725	1	0.870495	0.0366557	1	0.0945022	1	0.0834332	0.0715304	0.0423279	FALSE
Kdm3a	0.0241084	1	0.0600595	1	0.074593	1	0.0792951	1	0.109308	1	0.119926	1	0.0829883	1	0.0598895	1	0.160865	1	0.0844474	1	0.0549502	1	0.07839	1	-0.00295511	1	0.0581471	1	0.0275967	1	1	0.0535768	1	0.068471	1	0.092274	0.0714406	0.0603612	FALSE
Pfkp	0.0112437	1	-0.0142867	1	0.150951	1	-0.00313846	1	0.0641677	1	0.125914	1	0.102274	1	0.0362078	1	0.0706943	1	0.0519837	1	-0.0911148	1	0.0261822	1	0.261167	1	0.042195	1	0.2368	1	1	0.0847061	1	0.00743378	1	0.122108	0.0714161	0.0503639	FALSE
Gys1	0.0929062	1	0.0203295	1	0.131364	1	0.108359	3.27267e-05	0.0600257	1	0.0170052	1	0.0638383	1	0.0207596	1	0.0829067	1	-0.00626961	1	-0.0230068	1	0.0929403	1	0.130202	1	0.146119	1	0.133429	1	0.0236347	0.0778072	1	0.0448454	1	0.0915292	0.0713939	0.0574254	FALSE
Slc4a7	0.146191	1	0.0603352	1	0.115544	1	0.11011	0.0233921	0.0219871	1	0.0460059	1	0.0928244	1	0.0148483	1	0.124105	1	-0.0209789	1	-0.0390323	1	0.202342	1	0.00867013	1	0.0144199	1	0.173458	1	0.676509	0.0673634	1	0.0145116	1	0.132291	0.0713887	-0.0378377	FALSE
Cotl1	0.0864385	1	0.16082	0.0521691	0.134043	1	-0.0793501	1	0.186486	1	-0.0104703	1	-0.0263525	1	0.0799343	1	0.0758527	1	0.0570867	1	0.195677	1	0.121721	1	-0.146531	1	0.171948	1	0.0634542	1	1	-0.0217417	0.823054	0.158973	1	0.0769201	0.0713838	-0.0422449	FALSE
2002-09-01	0.0878584	0.983001	0.0590303	0.023549	0.0669293	1	0.0940919	1.2963e-12	0.0408999	1	0.0563701	1	0.084103	0.0132117	0.0355584	1	0.0212781	1	0.12535	1	0.162828	1	0.0150769	1	0.0882213	1	0.0324273	1	0.100543	1	8.0824e-10	0.095925	0.677805	0.0661487	1	0.0520396	0.0713711	0.0499151	FALSE
Rhog	0.0513987	1	0.034887	1	0.0129242	1	0.0121998	1	0.071697	1	0.0101237	1	0.0635225	1	0.0502279	1	0.00561331	1	0.101294	1	0.187783	1	0.0587727	1	0.166608	1	0.148805	1	0.0934286	1	1	0.0790047	1	0.09868	1	0.0361725	0.0712857	0.0615488	FALSE
Heca	0.024641	1	0.0542831	1	0.0575796	1	0.057958	1	0.0517599	1	0.0799159	1	0.0901659	0.0707828	0.0461907	1	0.0714584	1	-0.0622926	1	-0.00334009	1	0.215404	1	0.176435	1	0.0520378	1	0.157015	1	0.870528	0.0573815	1	0.0401863	1	0.116275	0.0712808	0.0348343	FALSE
Pitrm1	0.0647364	1	0.0977888	0.153214	0.07491	1	0.0715539	1	0.0621335	1	0.0791607	1	0.0251886	1	-0.012519	1	-0.023155	1	0.21274	1	0.058763	1	0.102175	1	0.272287	1	0.0117602	1	-0.0302477	1	1	0.129301	0.957848	0.0435853	1	0.0405686	0.0711517	0.0861467	FALSE
Supt6	0.13116	1	0.0333508	1	0.0287398	1	0.0805177	1	0.0766343	1	-0.00881939	1	0.0673128	1	-0.0222961	1	0.0601748	1	0.175717	1	0.18718	1	0.101711	1	0.0311073	1	0.0542144	1	0.0699399	1	1	0.097163	1	0.0658167	1	0.0503492	0.0711096	0.0747259	FALSE
Rab22a	0.0111192	1	0.0968061	1	-0.0332547	1	0.0439539	1	0.0892374	1	0.0388398	1	0.0752175	1	0.0979659	0.0158761	-0.0127545	1	0.252989	1	0.0409214	1	0.109334	1	0.131152	1	0.106183	1	0.0188179	1	1	0.102886	0.600935	0.0862227	1	0.0241964	0.0711018	0.0672286	FALSE
Ski	0.0560567	1	0.112924	0.0198253	0.0454475	1	0.0705719	1	0.0189866	1	0.0335817	1	0.0591873	1	0.0797316	1	0.060005	1	0.143803	1	0.0850028	1	-0.00854369	1	0.129136	1	0.0415823	1	0.138327	1	1	0.0917509	0.644307	0.0676455	1	0.0537635	0.0710533	0.0723977	FALSE
Pex3	0.00840002	1	-0.0364588	1	-0.0325863	1	0.0684688	1	0.0365917	1	0.0800523	1	0.0954187	0.403898	0.0238674	1	0.105414	1	0.124409	1	0.130481	1	0.198935	1	0.158346	1	0.0750962	1	0.0292207	1	0.997582	0.0910084	1	0.0459155	1	0.0762073	0.0710438	0.0484268	FALSE
Itgb5	0.0555501	1	-0.0952388	1	-0.0932051	1	0.112038	0.0196622	-0.0132301	1	-0.0353047	1	0.213778	3.88215e-05	0.0842659	1	-0.015777	1	0.357223	1	0.186706	1	-0.0523715	1	0.322427	1	0.0584386	1	-0.019899	1	0.00169474	0.212203	1	0.0441883	1	-0.0433115	0.0710267	0.0810614	FALSE
Hp1bp3	0.166446	1	0.0315432	1	0.158714	1	0.143245	0.00075809	0.033768	1	0.0628778	1	0.134785	0.967064	0.0383447	1	0.086304	1	0.127192	1	0.0154277	1	0.0213797	1	0.159915	1	-0.13318	1	0.0181441	1	0.154	0.146317	1	-0.00281924	1	0.069484	0.0709938	0.0663833	FALSE
Ttc5	0.0641529	1	0.0683364	0.649369	0.0333723	1	0.0380664	1	0.0657363	1	0.0270687	1	0.0910519	0.49967	0.0509234	1	0.0732556	1	0.140765	1	0.000712801	1	0.0524192	1	0.114484	1	0.125063	1	0.117219	1	0.999245	0.0897041	0.999913	0.0621545	1	0.0606671	0.0708419	0.0806614	FALSE
Agap1	0.0929842	1	0.070046	1	0.148271	1	0.00703471	1	0.113306	1	0.0385148	1	0.0597654	1	0.109061	0.00839088	0.0728087	1	0.0825349	1	-0.0143262	1	0.00530094	1	0.0202476	1	0.115947	1	0.141018	1	1	0.0525134	0.479794	0.0788069	1	0.0811827	0.0708343	0.0431558	FALSE
Mob1a	0.0484454	1	0.0681711	1	0.0665593	1	0.0919011	0.131229	0.0459159	1	0.142185	1	0.0989275	0.0418422	0.0656916	1	0.0963618	1	0.193575	1	0.0916738	1	0.0771497	1	-0.088986	1	0.115779	1	-0.0524291	1	0.405346	0.0687726	1	0.0774463	1	0.0659653	0.0707281	0.073592	FALSE
Ist1	0.0485856	1	0.0576495	1	0.0302133	1	0.0239585	1	0.0577708	1	0.066957	1	0.0815595	1	0.0867283	1	0.0566769	1	0.0946788	1	0.0442635	1	0.0461134	1	0.0917648	1	0.0574536	1	0.216446	1	1	0.0681095	1	0.0607732	1	0.0832813	0.0707213	0.0786727	FALSE
Myo9b	0.0929713	1	0.0732025	1	0.064942	1	0.0315357	1	0.0445426	1	0.0479283	1	0.0324419	1	0.0385453	1	0.0661755	1	0.145478	1	0.156219	1	0.0534298	1	0.0447028	1	0.0793102	1	0.0876086	1	1	0.0694259	1	0.078364	1	0.0640168	0.0706022	0.063273	FALSE
Pgm2	0.0851984	1	-0.0440212	1	0.115933	1	0.0793524	1	0.0416735	1	0.178405	1	0.0403165	1	0.00400972	1	0.0415448	1	-0.126516	1	-0.0482933	1	0.143764	1	0.134942	1	0.092766	1	0.318277	1	1	0.0426585	1	0.00922695	1	0.159585	0.0704901	0.0260725	FALSE
Clybl	0.0702529	1	0.00835212	1	0.0381888	1	0.0635529	0.0401743	0.0238888	1	0.0676451	1	0.0623798	0.441733	0.0309162	1	-0.00388634	1	0.145467	1	0.127136	1	0.0973417	1	0.101947	1	0.095019	1	0.12894	1	0.622668	0.0887198	1	0.0570625	1	0.0656459	0.0704761	0.0578721	FALSE
Sf3a1	0.067734	1	0.133372	0.025519	0.103561	1	0.0486542	1	0.125065	1	0.0770127	1	0.0252301	1	0.00785868	1	0.0722429	1	-0.0338387	1	0.228828	1	0.269993	1	0.00748791	1	0.00752386	1	-0.0836371	1	1	0.0230535	0.693325	0.100529	1	0.0878344	0.0704725	0.0996985	FALSE
Fnbp1l	-0.060226	1	0.0543322	1	-0.0029518	1	0.0860926	1	0.0855754	1	0.0497391	1	0.068467	1	0.0923697	1	0.0959171	1	0.0410984	1	0.136014	1	0.10718	1	0.143567	1	0.0894632	1	0.0678736	1	1	0.0557998	1	0.0915508	1	0.0635516	0.0703007	0.0377151	FALSE
Amer1	0.0423345	1	0.0458629	1	0.0168585	1	0.07081	0.0441784	0.0773941	1	0.060784	1	0.0588878	1	0.0721869	0.519932	0.024191	1	0.172661	1	0.107913	1	0.0864808	1	0.112992	1	0.12644	1	-0.0214695	1	0.794796	0.091537	0.999419	0.0859595	1	0.033369	0.0702885	0.0738824	FALSE
Smarcd1	0.136367	1	0.0508013	1	0.0885821	1	0.0886512	0.00220779	0.00755017	1	0.138551	1	0.0971353	0.00539976	0.0478107	1	0.0543932	1	0.17298	1	0.0950926	1	0.0931397	1	0.0444058	1	-0.0695131	1	0.00732309	1	0.0120147	0.107908	1	0.0263484	1	0.0763978	0.070218	0.0277783	FALSE
Inf2	0.126161	1	0.0496324	1	0.0392988	1	0.145339	1.81546e-07	0.0124844	1	0.0102181	1	0.119919	0.000223674	0.0632205	1	0.0477036	1	0.126348	1	0.154744	1	0.152444	1	-0.0502471	1	0.0349523	1	0.0203924	1	6.59908e-07	0.0935041	1	0.0630067	1	0.0540113	0.070174	0.0832848	FALSE
Ptpra	0.100724	1	0.12914	0.0721603	0.0315987	1	0.153798	6.46426e-05	0.103761	1	0.0442132	1	0.0799955	1	0.0156515	1	-0.0290951	1	0.124208	1	-0.103187	1	-0.00870848	1	0.272551	1	0.114959	1	0.021311	1	0.0366919	0.146255	0.87331	0.0520649	1	0.0118639	0.0700613	0.0991937	FALSE
Ralgapa1	0.050817	1	0.0919501	0.259983	0.139682	1	0.0320943	1	0.0431698	1	0.0411932	1	0.0708885	1	0.0708556	1	0.026612	1	-0.0176668	1	0.121099	1	0.0386983	1	0.037639	1	0.21332	1	0.0898103	1	1	0.0347544	0.987732	0.108079	1	0.0671991	0.0700108	0.0308743	FALSE
Papola	0.147678	1	0.140102	0.00124518	0.0727599	1	0.0774938	1	0.159855	0.283059	0.0679841	1	0.0702333	1	0.0952881	1	0.0219702	1	0.0552128	1	0.122677	1	0.0480345	1	-0.0474305	1	-0.0492786	1	0.0674542	1	1	0.0606374	0.102498	0.0937287	1	0.0556406	0.0700022	0.109898	FALSE
Strn3	0.192769	0.184457	0.137417	0.166005	0.0899819	1	0.130077	0.000502006	0.0209268	1	-0.00574026	1	0.11427	1	0.103321	0.294248	0.0569837	1	-0.0948626	1	0.091249	1	0.118614	1	0.0135328	1	0.0122327	1	0.0687313	1	0.0460125	0.0711573	0.812049	0.0730294	1	0.065714	0.0699669	0.0383556	FALSE
Ywhah	0.107439	1	0.0539309	1	0.0990426	1	0.0504225	1	-0.0164403	1	0.0386868	1	0.0744196	1	0.0932569	1	0.0121249	1	0.0081239	1	0.422608	0.739521	0.143894	1	0.157908	1	0.04332	1	-0.23929	1	1	0.0796626	0.999984	0.119335	1	0.0108916	0.0699631	0.0806565	FALSE
Cfap97	0.0383202	1	-0.00437584	1	0.0939542	1	0.116796	1.48586e-06	0.0347442	1	0.026016	1	0.147318	3.51697e-08	0.059636	1	0.138793	1	0.0477672	1	0.152234	1	0.0635051	1	0.174428	1	-0.0106175	1	-0.0314529	1	2.17995e-09	0.104926	1	0.0463242	1	0.0581631	0.0698044	0.0846948	FALSE
Nipbl	0.0530536	1	0.0135936	1	-0.00708249	1	0.109216	0.0294538	0.131889	1	0.0831883	1	0.0857694	1	0.0385485	1	0.0502386	1	0.226658	1	0.164362	1	0.0465085	1	-0.0192452	1	0.0390425	1	0.0306803	1	0.720729	0.0910903	1	0.0774872	1	0.0407066	0.0697614	0.131344	FALSE
Ccdc50	0.026613	1	0.0419328	1	0.0592287	1	0.0591213	1	0.0620739	1	0.0987004	1	0.0739108	1	0.041774	1	0.0548325	1	0.234225	1	0.0681976	1	0.0578106	1	0.0661577	1	0.0452046	1	0.055902	1	1	0.0920055	1	0.0518366	1	0.0652948	0.0697123	0.0331359	FALSE
2008-09-01	0.0728491	1	0.0754451	1	0.0697909	1	0.0389612	1	0.0397269	1	0.0915475	1	0.0422715	1	0.0591375	1	0.0472504	1	0.0859929	1	0.0530907	1	0.0936388	1	0.0734945	1	0.0965693	1	0.105349	1	1	0.0627138	1	0.0647939	1	0.0815154	0.0696744	0.0295361	FALSE
Camk2n1	0.129802	1	0.324784	5.25154e-15	0.0132472	1	0.0299088	1	0.126884	1	-0.0131032	1	0.0697997	1	0.0556748	1	0.0514172	1	-0.0325375	1	-0.0044029	1	0.0277839	1	0.100456	1	-0.0372467	1	0.202172	1	1	0.0594858	2.8988e-10	0.0931387	1	0.0563034	0.0696426	0.000529531	FALSE
Ywhae	0.110275	1	0.0237569	1	0.0500709	1	0.0885593	0.0307747	0.0361735	1	0.0461737	1	0.0793571	1	0.0302625	1	0.0970933	1	0.0266185	1	0.0644467	1	0.0703453	1	0.0821259	1	0.0286934	1	0.209851	1	0.729016	0.0773871	1	0.0366666	1	0.0947069	0.0695869	0.064698	FALSE
1600012H06Rik	0.158971	0.83111	0.0884776	1	0.0309046	1	0.00102892	1	0.0295748	1	-0.03614	1	0.0479174	1	0.0805505	1	0.0362456	1	0.0671222	1	0.0446701	1	-0.00972327	1	0.0508018	1	0.217904	1	0.234215	1	0.999998	0.0651683	1	0.0922353	1	0.0511005	0.0695014	0.0169033	FALSE
Asap2	0.106714	1	-0.0578921	1	0.0359027	1	0.0292413	1	-0.0685262	1	0.0862519	1	0.143958	0.743161	0.113537	1	0.181091	0.339009	0.0133143	1	0.326813	1	0.207853	1	-0.0773988	1	-0.0277062	1	0.0287406	1	0.999985	0.0431659	1	0.0572452	0.994927	0.107968	0.0694596	0.0739681	FALSE
Wbp1l	0.0597395	1	0.0580466	1	0.0240573	1	0.0716247	0.0591106	0.027475	1	0.0396885	1	0.0498491	1	0.067871	1	0.0244418	1	0.181802	1	0.131434	1	-0.00466827	1	0.0499554	1	0.17247	1	0.0874678	1	0.843235	0.0825942	1	0.0914592	1	0.0341974	0.0694169	0.0526915	FALSE
Mthfd1l	0.0416414	1	0.017563	1	0.10493	1	0.0341956	1	0.0547148	1	0.0497851	1	0.0105339	1	-0.0304097	1	-0.0209598	1	0.141836	1	0.178484	1	0.201583	1	0.0683318	1	0.00579022	1	0.182328	1	1	0.0593077	1	0.0452284	1	0.103533	0.0693565	0.0581368	FALSE
Nono	0.00133797	1	0.161371	0.0030295	0.161548	1	-0.0171799	1	0.0617077	1	-0.0249876	1	0.0223752	1	0.0633672	1	0.0374709	1	0.216087	1	0.138081	1	0.192087	1	0.113058	1	0.00281866	1	-0.0902651	1	1	0.0671356	0.31281	0.0854689	1	0.0551706	0.0692584	0.131755	FALSE
Creb5	0.173821	1	0.185999	9.42537e-07	0.199347	1	0.00119724	1	0.0391871	1	0.0190224	1	0.0154758	1	0.0571253	1	0.0991093	1	-0.0993889	1	0.0440689	1	-0.0195672	1	0.00674798	1	0.0121283	1	0.302056	1	1	0.0195706	0.00197972	0.0677017	1	0.119993	0.0690886	0.0433761	FALSE
Rpl22l1	-0.0804506	1	-0.117041	1	0.135803	1	0.160477	0.000126412	0.0462236	1	0.171357	1	-0.0996417	1	0.124843	0.056547	0.130334	1	-0.0349837	1	0.56015	0.367063	-0.229492	1	-0.0330086	1	0.083193	1	0.217602	1	0.0557801	-0.0175214	0.65326	0.139474	1	0.0851207	0.0690243	-0.0712761	FALSE
Senp6	0.101863	1	0.0679244	1	0.0311085	1	0.00943353	1	0.0450052	1	-0.0666049	1	0.0278742	1	0.0847179	1	0.0633601	1	-0.0273397	1	0.242273	1	0.0965768	1	0.0765894	1	0.198134	1	0.0837365	1	1	0.0376841	1	0.127611	1	0.0416354	0.0689768	0.0829046	FALSE
Ckap5	0.127644	1	0.213919	0.00243868	0.136334	1	0.0982269	1	0.0543694	1	0.0477793	1	-0.00823609	1	0.00439676	1	0.0733524	1	-0.0281544	1	0.0910344	1	0.0887192	1	0.0897348	1	-0.0777367	1	0.121785	1	1	0.055843	0.282881	0.0571966	1	0.0935939	0.0688778	0.15226	FALSE
Tnrc6b	0.113199	1	0.0673839	1	0.0434165	1	0.123651	1.77182e-10	0.0652973	1	0.00589016	1	0.0989063	6.72322e-05	0.0677296	1	0.0286605	1	0.124699	1	0.0595942	1	0.0290604	1	0.139258	1	0.00628415	1	0.0600089	1	5.96398e-10	0.119943	1	0.0532578	1	0.0334073	0.0688693	0.0577518	FALSE
Rasa3	0.0320032	1	0.0643973	1	0.0231039	1	0.0914876	0.000431156	0.0671485	1	0.0230439	1	0.0790207	1	0.0887632	1	0.0666689	1	0.0543803	1	0.239677	1	0.125982	1	0.0676249	1	0.0783278	1	-0.0690152	1	0.11493	0.0649033	1	0.107663	1	0.0339567	0.0688409	0.0424669	FALSE
Raph1	0.0344797	1	0.0270718	1	0.0786912	1	0.0739275	1	0.0924987	1	0.0688913	1	0.0491115	1	0.0131293	1	0.0272086	1	0.00786586	1	0.116759	1	0.201786	1	0.120737	1	-0.0704184	1	0.189003	1	1	0.0572243	1	0.035808	1	0.113116	0.0687161	0.0729495	FALSE
Scpep1	0.0772576	1	0.173257	1.63377e-05	0.0804848	1	0.0650748	1	0.0911193	1	0.102329	1	0.0302367	1	0.0637399	1	0.00758983	1	0.172569	1	0.0699887	1	0.000913993	1	0.0705577	1	0.0170751	1	0.00802943	1	1	0.0831391	0.0148816	0.0830359	1	0.0398695	0.0686815	0.0695018	FALSE
Stx16	0.081255	1	0.07975	0.814652	0.0193667	1	0.0649155	1	0.0698434	1	0.0523955	1	0.0700748	1	0.0955975	0.11311	0.076576	1	-0.044898	1	-0.0851142	1	0.0198852	1	0.132391	1	0.167176	1	0.229413	1	1	0.0607477	0.906078	0.0654505	1	0.0795273	0.0685752	0.102766	FALSE
Vps4a	0.0477801	1	0.0131803	1	0.0507959	1	0.0301585	1	0.089197	1	0.0595929	1	0.105975	0.000408489	0.0521655	1	0.0437047	1	0.185794	1	0.0633263	1	0.0999446	1	0.120969	1	0.110692	1	-0.0461303	1	0.111477	0.0981352	1	0.0657122	1	0.0415816	0.0684763	0.0298311	FALSE
Rnf10	0.155966	0.498858	0.0786128	1	0.0518254	1	0.118926	0.00474947	0.00948387	1	0.0172271	1	0.130234	0.0194217	0.0738447	1	-0.00567769	1	-0.130333	1	0.218731	1	0.0461168	1	0.0576959	1	0.165122	1	0.0391484	1	0.0295087	0.0664978	1	0.109159	1	0.029728	0.0684616	0.079876	FALSE
Cir1	-0.0131274	1	0.0409114	1	-0.00793676	1	0.0989072	0.013254	-0.000841874	1	0.127142	1	0.0939989	1	0.0137289	1	0.065757	1	0.0222855	1	-0.0684493	1	0.0542245	1	0.278989	1	-0.0333226	1	0.354215	1	0.565908	0.0962106	1	-0.0095947	1	0.11868	0.0684321	0.0145148	FALSE
Pik3c2a	0.0538492	1	0.0643432	1	0.0454031	1	0.0466731	1	0.0191345	1	0.0973736	1	0.0681347	1	0.0377727	1	0.10086	1	0.0179389	1	0.0436907	1	0.145038	1	0.0279687	1	0.071913	1	0.185374	1	1	0.0429129	1	0.0473708	1	0.11481	0.0683644	0.0326886	FALSE
Fcho2	0.049922	1	0.108598	1	0.0599907	1	0.0451342	1	0.0664365	1	0.0844638	1	0.0500616	1	0.130486	0.000988757	0.0398145	1	0.0460996	1	0.292288	1	0.00355203	1	0.0632307	1	-0.0888981	1	0.0722822	1	1	0.0508896	0.180504	0.101782	1	0.0520207	0.0682308	0.026946	FALSE
Exoc4	0.0810435	1	0.0783261	1	0.0301701	1	0.0785674	0.12673	0.0509372	1	0.0387826	1	0.0653737	1	0.0414103	1	0.00555681	1	0.169007	1	0.122077	1	0.105565	1	0.0104424	1	0.112733	1	0.0328984	1	0.941225	0.0808868	1	0.0810967	1	0.0425946	0.0681927	0.0828707	FALSE
Plce1	0.0388791	1	-0.0290268	1	0.0692569	1	0.028333	1	-0.00978681	1	-0.00466791	1	0.0834113	2.70014e-06	0.0190475	1	0.0730595	1	0.338578	1	0.19263	1	0.0272963	1	0.238202	0.307316	-0.0330724	1	-0.011034	1	0.00180247	0.145481	1	0.0279583	1	0.0307822	0.0680737	0.0677033	FALSE
Hbp1	0.054428	1	0.0253453	1	-0.00180353	1	0.0524015	1	0.0687237	1	0.0145842	1	0.0483518	1	0.0821225	0.000788138	0.11276	1	-0.0493369	1	0.0940892	1	0.0724004	1	0.121226	1	0.150997	1	0.17471	1	1	0.045414	0.160098	0.0842555	1	0.0745301	0.0680665	0.0127164	FALSE
Nrep	-0.0152475	1	0.0442654	1	0.00684264	1	0.03849	1	0.189911	0.112781	-0.0126	1	0.0236024	1	0.204356	1.49581e-11	0.0454368	1	0.0991252	1	0.107774	1	0.0116711	1	0.0161095	1	0.109391	1	0.148146	1	1	0.0324159	4.42256e-08	0.13114	1	0.0398993	0.0678183	0.0356886	FALSE
Parp1	0.0905741	1	0.0616128	1	0.151992	1	0.0368584	1	0.0377797	1	0.0499952	1	0.0465408	1	0.0126442	1	0.0217217	1	0.250804	1	0.0911616	1	0.222666	1	-0.00129113	1	0.00904996	1	-0.0667306	1	1	0.0846973	1	0.0424497	1	0.0759287	0.0676919	0.175851	FALSE
Son	0.0523713	1	-0.0428387	1	0.0765696	1	0.0745532	1	-0.033953	1	0.0543526	1	0.160673	0.00017522	-0.020659	1	0.163599	0.246155	0.164512	1	0.0632177	1	0.0789782	1	0.217863	1	-0.173458	1	0.174938	1	0.0680054	0.133995	1	-0.0415383	0.985676	0.109688	0.0673813	-0.163376	FALSE
2210016L21Rik	0.0170299	1	-0.0109627	1	0.0117802	1	0.103872	0.000475769	0.0462716	1	0.0289706	1	0.0772527	1	0.0708422	1	0.0112769	1	0.00948189	1	0.188133	1	0.0220616	1	0.152066	1	0.151856	1	0.130528	1	0.121462	0.0719405	1	0.0892279	1	0.0409234	0.0673639	0.0969986	FALSE
Ttc33	0.00809938	1	0.0295975	1	0.0329459	1	0.0991902	0.00223163	0.102984	1	0.0609156	1	0.0802159	1	0.0998228	1	0.0946714	1	0.0881672	1	0.147036	1	0.118025	1	0.101695	1	0.0436283	1	-0.0968896	1	0.271245	0.0754736	1	0.0846137	1	0.0419336	0.0673403	0.090997	FALSE
Ccnt2	0.096889	1	0.0867442	1	0.0667025	1	0.0397609	1	0.0937067	1	0.0421503	1	0.0495962	1	0.0314172	1	0.0213589	1	0.134127	1	-0.0550351	1	0.057261	1	0.0793538	1	0.226406	1	0.0384719	1	1	0.0799453	1	0.0766478	1	0.0451889	0.0672607	0.0534918	FALSE
Pcbp2	0.0126725	1	0.119213	1	0.00272697	1	0.0637145	1	0.0492869	1	0.0277443	1	0.00910839	1	-7.68989e-05	1	-0.0236769	1	0.174733	1	0.0232601	1	0.151917	1	0.170946	1	0.0845326	1	0.141732	1	1	0.0862349	1	0.0552431	1	0.0600885	0.0671888	0.0342842	FALSE
Pkd2	0.0561884	1	0.0280237	1	0.038107	1	0.0335769	1	0.0317207	1	0.0279494	1	0.0973315	0.0039882	0.0490177	1	0.0298388	1	0.143306	1	0.0648231	1	0.121598	1	0.104818	1	0.0773596	1	0.103347	1	0.353726	0.0870441	1	0.050189	1	0.064168	0.0671337	0.0665679	FALSE
Ppp4r2	0.151778	1	0.15801	0.0248256	0.105781	1	0.0500669	1	0.100732	1	0.155485	1	-0.0158301	1	-0.0238682	1	0.0534086	1	0.026523	1	0.000581716	1	0.0936745	1	-0.0369955	1	0.00979288	1	0.177466	1	1	0.0351085	0.688015	0.0490496	1	0.117163	0.0671071	0.0737806	FALSE
Rpp21	-0.0255985	1	-0.0310917	1	-0.0301866	1	0.0474629	1	0.0290454	1	0.112311	1	0.0437538	1	0.0621422	1	0.131306	1	0.205409	1	0.142132	1	0.213109	1	0.0223841	1	0.0147372	1	0.0690279	1	1	0.0586822	1	0.0433931	1	0.0991132	0.0670629	0.0775083	FALSE
Wtap	0.0974566	1	0.153386	0.00541628	0.0827024	1	0.0291755	1	0.0623848	1	0.0485062	1	0.0510866	1	0.0587136	1	0.114903	1	-0.0380069	1	0.0986738	1	0.0331694	1	0.0014871	1	0.0110721	1	0.199708	1	1	0.0282398	0.403051	0.0768461	1	0.0957978	0.0669612	0.0134911	FALSE
Snx4	0.122963	1	0.0325615	1	0.0267462	1	0.0449604	1	0.0635998	1	-0.0158362	1	0.102842	1	0.0258421	1	-0.0207611	1	0.132606	1	0.182742	1	0.0259799	1	0.225654	1	0.0161573	1	0.0381499	1	1	0.125805	1	0.0641804	1	0.0108557	0.0669471	0.103809	FALSE
Nbr1	0.0963947	0.0379563	0.0438835	1	0.0191572	1	0.0607931	0.0846578	0.0667772	1	0.0323413	1	0.04821	1	0.0260544	1	-0.00255897	1	0.141677	1	0.0424382	1	-0.00827814	1	0.0338638	1	0.222658	1	0.180485	1	0.321297	0.0761877	1	0.0803622	1	0.0442293	0.0669264	0.0415338	FALSE
Atl3	0.115681	1	0.0349951	1	0.0467124	1	0.0535894	1	0.0380882	1	-0.00727853	1	0.139442	0.0562078	0.0762087	1	0.0651609	1	0.120703	1	0.14349	1	0.00145377	1	0.0723147	1	0.0579399	1	0.0450109	1	0.835217	0.100346	1	0.0701444	1	0.0302119	0.0669007	0.0572106	FALSE
Apc	0.100449	1	0.0466681	1	0.0292771	1	0.0810064	0.672203	0.0470726	1	-0.0108357	1	0.0918608	1	0.0900291	0.364592	0.031789	1	0.193045	1	0.170042	1	0.194716	1	-0.0676479	1	-0.0204562	1	0.0262265	1	0.999941	0.0797426	0.996201	0.0666712	1	0.0542346	0.0668828	0.0790044	FALSE
Dhx15	0.11122	1	0.11258	1	0.141506	1	0.0203097	1	-0.0250792	1	0.085238	1	-0.0204509	1	-0.0195561	1	0.0354077	1	-0.0449102	1	0.277702	1	0.227629	1	-0.0647177	1	0.0994164	1	0.066076	1	1	0.0002901	1	0.0890125	1	0.111171	0.0668247	-0.110415	FALSE
Etv1	-0.00217953	1	0.0130764	1	-0.0548337	1	0.0439965	1	0.0269768	1	0.105846	1	0.0916701	1	0.0737636	1	0.0533129	1	-0.0454141	1	0.219808	1	0.124424	1	0.197617	1	0.139377	1	0.013554	1	1	0.0571381	1	0.0946004	1	0.0484606	0.066733	-0.00376965	FALSE
Uqcc2	-0.0418944	1	0.0384684	1	0.114337	1	0.038324	1	0.100028	1	0.0564526	1	0.0283773	1	0.196503	1.78133e-08	0.107043	1	-0.043144	1	0.264855	1	0.148573	1	-0.112353	1	-0.0368811	1	0.142247	1	1	-0.026138	9.52755e-05	0.112595	1	0.113731	0.0667292	-0.112179	FALSE
Esyt2	0.0826402	1	0.11685	0.000298674	0.0707118	1	0.0411831	1	0.098073	1	-0.00821458	1	0.0394821	1	0.0367406	1	-0.0324942	1	0.0627032	1	0.0669876	1	-0.0196979	1	0.135481	1	0.233146	1	0.0763556	1	1	0.0722979	0.0931723	0.110359	1	0.0173321	0.0666631	0.050867	FALSE
AC191865.2	0.0540925	1	0.0606406	0.400531	0.064321	1	0.0399575	0.1456	0.0749335	1	0.0595752	1	0.0949329	0.00608999	0.0821245	0.660896	0.02663	1	0.00282131	1	-0.0345239	1	0.0210287	1	0.0766097	1	0.161641	1	0.214799	1	0.170453	0.0536828	0.988364	0.0689632	1	0.0772707	0.0666389	0.057456	FALSE
Eef1a1	0.127908	1	0.256789	3.56861e-20	0.0857993	1	0.0755834	0.0142479	0.0898632	1	-0.000451187	1	0.0833573	0.270838	0.0504901	1	-0.0681262	1	-0.11856	1	0.240292	1	-0.0326707	1	0.0162768	1	0.123525	1	0.0693314	1	0.348647	0.0369132	6.55015e-15	0.152192	1	0.0107765	0.0666272	0.0121364	FALSE
Rlim	0.0111812	1	0.0952911	1	0.0548911	1	0.0103465	1	0.00159667	1	0.0445808	1	0.0342199	1	0.045335	1	0.0472284	1	0.19499	1	0.140743	1	0.127892	1	0.00936787	1	0.15675	1	0.0249082	1	1	0.0520211	1	0.0879433	1	0.0599	0.0666215	0.0466353	FALSE
Smchd1	0.032294	1	0.185203	0.000882916	0.052511	1	0.0407066	1	0.0435397	1	-0.0325048	1	0.068946	1	0.00248635	1	0.104469	1	0.0834239	1	0.205664	1	0.341026	0.0841875	-0.0518714	1	-0.0313825	1	-0.0459397	1	1	0.0346998	0.170067	0.0811021	0.894531	0.0839123	0.0665714	0.138498	FALSE
Cltc	0.128446	1	0.0428958	1	0.0836113	1	0.14595	0.0158248	0.0752772	1	-0.0513039	1	0.148112	0.0187522	-0.00250196	1	-0.00661174	1	0.1654	1	-0.0702109	1	0.0698042	1	0.0568773	1	0.213271	1	-0.000798136	1	0.0928243	0.128957	1	0.0517463	1	0.0189404	0.0665479	0.017324	FALSE
Nbeal1	0.104025	1	0.104812	1	0.119151	1	0.0898163	0.0135474	0.0691694	1	0.0141222	1	0.0991066	0.0854427	0.101619	0.00400999	-0.0182334	1	0.0875452	1	0.0869904	1	-0.0938063	1	0.203047	1	0.0601892	1	-0.0299052	1	0.195884	0.116708	0.35457	0.0845559	1	-0.00173422	0.0665099	0.077038	FALSE
Rb1cc1	0.0216008	1	-0.00352657	1	0.0304929	1	0.0652328	1	0.0436515	1	0.120562	1	0.0802372	1	0.0250093	1	0.065847	1	0.133716	1	-0.0136935	1	0.0433054	1	0.140586	1	0.184165	1	0.0601834	1	1	0.0882745	1	0.0471212	1	0.0640781	0.0664913	0.0685287	FALSE
Syne2	0.10443	1	0.14964	0.000260649	0.0613255	1	0.138675	6.96597e-07	-0.0146119	1	0.0591218	1	0.108961	1	0.0281209	1	0.0446949	1	-0.0562951	1	0.164366	1	0.162965	1	0.0857124	1	-0.136065	1	0.0963154	1	0.0015839	0.0762968	0.0860683	0.0382901	1	0.0848845	0.0664904	0.0174716	FALSE
Serbp1	0.137989	1	0.0254588	1	0.0907745	1	0.0402784	1	0.0118054	1	0.0984211	1	0.0406764	1	-0.0715548	1	0.0835247	1	0.186273	1	0.103335	1	0.11247	1	0.00998185	1	-0.0226637	1	0.150168	1	1	0.0830397	1	0.00927617	1	0.107072	0.0664625	0.106399	FALSE
Pfkl	0.00927038	1	-0.0211719	1	-0.037377	1	0.0988127	0.333133	0.0341649	1	-0.0745603	1	0.0698361	1	-0.000213635	1	0.0279674	1	-0.183206	1	0.126792	1	-0.043744	1	0.22754	1	0.29393	1	0.468626	1	0.994581	0.0444507	1	0.0867003	1	0.0681824	0.0664445	0.105234	FALSE
Pum2	0.0505872	1	0.108518	0.0146099	0.0422227	1	0.0492649	1	0.0896513	1	0.0164898	1	0.029537	1	0.0379379	1	0.0497385	1	-0.0468032	1	0.244219	1	0.218296	1	-0.000808739	1	0.0144026	1	0.093189	1	1	0.0163554	0.584764	0.0989457	1	0.0839873	0.0664295	0.0355076	FALSE
Ptpn12	0.111994	1	0.104249	0.0974016	0.08562	1	0.0603086	1	0.0143125	1	0.0280082	1	0.0538718	1	0.0483945	1	0.0761231	1	0.079402	1	0.0749174	1	0.0965797	1	0.191977	1	-0.00299987	1	-0.0272339	1	1	0.0995107	0.912833	0.0477746	1	0.0518194	0.0663682	-0.0392022	FALSE
Phldb2	0.112625	1	0.0672921	1	0.0089564	1	0.0891241	0.612214	-0.00706773	1	-0.0899359	1	0.132326	1	0.0466981	1	0.00970436	1	0.155898	1	0.308075	1	-0.031535	1	0.0799959	1	0.065565	1	0.0476769	1	0.999842	0.113994	1	0.0961125	1	-0.0110266	0.0663599	0.130029	FALSE
Ash1l	0.0192697	1	0.118704	0.912146	0.0973981	1	0.0829371	1	0.0346713	1	0.0075892	1	0.0348968	1	0.0723672	1	0.150179	1	-0.0230352	1	-0.0610904	1	0.237026	1	0.162458	1	0.0782147	1	-0.0169644	1	1	0.0553054	1	0.0485733	1	0.0950456	0.0663081	0.0893719	FALSE
Stx17	0.118818	1	0.0438008	1	0.0465315	1	0.05474	1	0.0500745	1	0.0437911	1	0.0600672	1	0.0279568	1	0.0754556	1	0.123642	1	-0.0590385	1	0.116409	1	0.0689468	1	0.136338	1	0.0850483	1	1	0.0852429	1	0.0398262	1	0.0734471	0.0661721	0.0874155	FALSE
Xpc	0.0414047	1	0.0466829	1	0.0187098	1	0.0763275	0.0151575	0.0414372	1	0.0761515	1	0.0637562	1	0.0623247	1	0.0384288	1	0.107873	1	0.0541563	1	0.0548109	1	0.15509	1	0.0546389	1	0.100386	1	0.591916	0.0888903	1	0.051848	1	0.0576975	0.0661453	0.0504999	FALSE
Zfp469	0.00944898	1	-0.0176997	1	0.0549516	1	0.00707621	1	0.0934684	1	0.0608583	1	0.0203809	1	0.0716094	1	0.0762044	1	0.046546	1	0.0461648	1	0.0239844	1	0.0628959	1	0.188139	1	0.247075	1	1	0.0292696	1	0.0763364	1	0.0926147	0.0660736	0.0119182	FALSE
Clic4	0.0491853	1	0.0560738	1	-0.00570864	1	0.117161	0.277944	0.122759	1	0.0382122	1	0.191317	0.0348497	0.117266	1	0.0389949	1	0.0427173	1	0.0599427	1	0.0753547	1	0.211921	1	0.00446294	1	-0.128584	1	0.506304	0.12246	1	0.0721009	1	0.00365379	0.0660716	0.0360039	FALSE
Ap3d1	0.09706	1	0.0730375	0.379186	0.0459697	1	0.0583869	1	0.0355133	1	0.0409905	1	0.0368033	1	0.0237268	1	0.00312711	1	0.111601	1	0.140318	1	0.107255	1	0.158839	1	0.0198428	1	0.0375235	1	1	0.0925381	0.996783	0.0584877	1	0.0469732	0.0659997	0.0426702	FALSE
Bmp1	0.0417638	1	0.10175	1	0.0269388	1	-0.00113823	1	0.138848	1	0.0855499	1	0.0153922	1	0.110436	0.0711401	0.0395351	1	0.0247549	1	0.0910663	1	0.00348952	1	0.20005	1	0.0662555	1	0.0449598	1	1	0.0561645	0.871257	0.101671	1	0.0400946	0.0659768	0.0318082	FALSE
Sipa1l1	0.14433	1	0.126063	0.302776	0.0935098	1	0.121169	0.0201527	0.0663314	1	0.0231666	1	0.0576033	1	0.00267475	1	0.144526	1	0.114791	1	0.160836	1	-0.00543328	1	-0.0470496	1	-0.126469	1	0.112984	1	0.647504	0.0781686	0.99239	0.0458872	1	0.0737507	0.0659355	0.0707406	FALSE
Rpl35a	-0.0157769	1	0.142661	3.57841e-06	0.0585838	1	-0.0275919	1	0.0840112	1	0.173548	0.00177768	-0.102299	0.000472394	0.0487699	1	0.118749	0.00213564	-0.00690272	1	0.0246488	1	0.0553164	1	-0.0797073	1	0.199221	1	0.314828	1	0.120979	-0.0464556	0.00519372	0.0998623	0.00541633	0.144205	0.0658706	-0.406783	FALSE
Scaf11	0.0801059	1	0.0782058	1	0.0980631	1	0.112199	0.2808	0.0830152	1	0.113754	1	0.0358619	1	0.0233552	1	0.0913385	1	0.0751941	1	-0.0596242	1	0.210798	1	0.0216649	1	-0.0150836	1	0.0388716	1	0.990276	0.0650052	1	0.0219737	1	0.110565	0.065848	0.0833198	FALSE
Suz12	0.101792	1	0.0927194	1	0.0753557	1	0.0809337	1	0.0427782	1	0.120602	1	0.0270604	1	0.0132236	1	0.116924	1	0.0739314	1	0.0882655	1	0.0060051	1	-0.00193758	1	0.0567446	1	0.0911083	1	1	0.056356	1	0.0587463	1	0.081999	0.0657004	0.0988308	FALSE
Lipa	0.100816	1	0.113189	0.00447595	-0.0257711	1	0.112797	0.000472597	0.0493735	1	-0.0132553	1	0.163915	0.00892008	0.0623961	1	-0.0199277	1	0.155777	1	0.160374	1	0.000240242	1	0.165264	1	0.00252953	1	-0.0426758	1	0.00583298	0.139714	0.371866	0.0775723	1	-0.0202779	0.0656693	0.105045	FALSE
Trim25	-0.0215408	1	0.0374007	1	0.0396636	1	0.0465082	1	0.00656118	1	0.0142731	1	0.0307796	1	0.066667	1	0.0689829	1	-0.0157641	1	0.0771617	1	0.115316	1	0.0627933	1	0.114295	1	0.340378	1	1	0.0205552	1	0.0604172	1	0.115723	0.065565	0.0784368	FALSE
Dbp	-0.00556756	1	0.0135245	1	-0.00191333	1	0.0157522	1	0.0826179	1	-0.00401073	1	0.00205554	1	0.0640073	1	0.0521793	1	0.104724	1	0.31715	5.10752e-06	0.0752599	1	0.0257445	1	0.177995	1	0.0637904	1	1	0.0285417	0.00667754	0.131059	1	0.0370611	0.0655539	0.00456061	FALSE
Wbp11	0.097877	1	0.0228812	1	0.0362844	1	0.113199	0.0423729	0.0682359	1	0.0879919	1	0.0537577	1	-0.0176901	1	0.185351	1	0.13093	1	0.0688724	1	0.0933869	1	0.139089	1	-0.0568718	1	-0.0407587	1	0.78748	0.106971	1	0.0170855	1	0.0724511	0.0655024	0.0214599	FALSE
Vamp5	-0.00559819	1	-0.197167	1	-0.0371377	1	0.13298	0.593877	0.0867845	1	0.0313968	1	0.227774	1.81859e-06	0.120256	1	-0.0198638	1	0.182616	1	0.221876	1	0.0232705	1	0.178552	1	0.00395743	1	0.0325326	1	0.00218778	0.143265	1	0.0471416	1	0.00603967	0.065482	0.160108	FALSE
Smim10l1	0.0590449	1	0.0591848	1	0.0219359	1	0.0736799	1	0.0971268	1	0.0278322	1	0.120352	0.116167	0.0965688	0.418854	0.00818952	1	0.0658036	1	0.0402451	1	-0.0176574	1	0.187624	1	0.174056	1	-0.0318918	1	0.932517	0.101301	0.99797	0.0934362	1	0.00168168	0.0654729	0.076717	FALSE
Cdkn2b	0.232385	0.0704993	0.0470284	1	0.0283332	1	0.146129	2.27784e-07	0.176983	0.85539	0.0286777	1	0.153351	0.00199179	0.130012	0.0532179	-0.0550952	1	0.111516	1	-0.0653983	1	-0.0303774	1	0.206763	1	0.0813565	1	-0.210054	1	5.39883e-07	0.170029	0.799997	0.0739965	1	-0.0477032	0.0654408	0.219474	FALSE
Vezf1	0.0877814	1	0.0945244	0.0607377	0.0738606	1	0.0701532	1	0.0405658	1	0.0536515	1	0.0522103	1	0.0664246	1	0.0721887	1	0.0303804	1	0.0197818	1	-0.00818498	1	0.156381	1	0.094807	1	0.0769407	1	1	0.0793812	0.847491	0.0632207	1	0.0536913	0.0654311	0.0278392	FALSE
Cnot6l	0.0712984	1	0.0647525	1	-0.00756996	1	0.0725362	0.867923	0.0746475	1	-0.0290481	1	0.0697757	1	0.0852841	1	0.0533541	1	-0.0167201	1	0.259598	1	0.257289	1	0.0996955	1	0.110862	1	-0.184643	1	1	0.0593171	1	0.119029	1	0.0178764	0.0654075	0.108418	FALSE
Znrd1as	0.0463818	1	0.0641006	1	0.0472746	1	0.0719283	0.0159974	0.0569076	1	0.118264	1	0.0874477	0.029303	0.0754565	1	0.0339857	1	0.0457105	1	0.105735	1	0.123481	1	0.0645137	1	0.00648632	1	0.0332044	1	0.120459	0.0631964	1	0.0617373	1	0.0712419	0.0653919	0.0853824	FALSE
Myo18a	0.105521	1	0.119157	0.000901783	0.103455	1	0.0942574	6.03604e-06	0.0646581	1	0.0445113	1	0.0614803	1	0.0541161	1	0.0512842	1	0.100152	1	0.0465908	1	0.117389	1	0.109166	1	0.000245438	1	-0.0917827	1	0.00750666	0.0941151	0.171978	0.0569535	1	0.0449713	0.0653466	0.0883339	FALSE
Mpnd	0.0227543	1	0.0263545	1	0.0259029	1	0.0494465	1	-0.0140211	1	0.0806766	1	0.0414169	1	0.0454187	1	0.00765187	1	0.23762	1	0.241481	1	-0.00497429	1	0.087232	1	0.0971092	1	0.0352998	1	1	0.087694	1	0.0792684	1	0.0289114	0.0652913	0.0843362	FALSE
Vcpip1	0.05246	1	0.0490465	1	0.0700973	1	0.00401929	1	-0.0125383	1	0.101836	1	0.0461784	1	0.0529626	1	0.0242247	1	0.031772	1	0.105629	1	0.094089	1	0.102859	1	0.0930765	1	0.163343	1	1	0.0474577	1	0.0576352	1	0.090718	0.0652703	0.0541519	FALSE
Slc20a1	0.12084	1	0.0977058	1	-0.0984662	1	0.0632126	1	0.124443	1	-0.248234	1	0.243894	0.463353	0.233573	1	0.0196121	1	0.0126252	1	0.404377	1	0.0946846	1	0.347101	1	-0.0188951	1	-0.418529	1	0.99881	0.157535	1	0.168241	1	-0.130186	0.0651964	0.111369	FALSE
Cdr2l	0.0445176	1	0.0642052	1	-0.00168371	1	0.0292528	1	0.100684	1	0.0238618	1	0.0138592	1	0.0479597	1	0.0392168	1	0.16177	1	0.148251	1	0.186496	1	-0.0262791	1	0.0521891	1	0.0928065	1	1	0.0446242	1	0.0826579	1	0.0681395	0.0651405	0.0808447	FALSE
Rnf19b	-0.0104024	1	0.14565	1	0.188016	1	-0.0421358	1	0.0154412	1	0.134095	1	0.00877055	1	0.00727363	1	0.09352	1	0.0629753	1	0.112006	1	0.03385	1	-0.0599857	1	0.0672978	1	0.220356	1	1	-0.00815563	1	0.0695337	1	0.133967	0.0651152	-0.0586116	FALSE
Ube2h	0.0736729	1	0.0669243	1	0.0108102	1	0.0904143	0.952736	0.0279308	1	0.079427	1	0.0976419	1	0.0239911	1	-0.0250945	1	0.0259954	1	0.0858829	1	0.0617366	1	0.192182	1	0.0635538	1	0.101602	1	1	0.0959813	1	0.0536566	1	0.0456963	0.0651114	0.0479228	FALSE
Rab6a	0.0969415	1	0.0816226	1	0.0493519	1	0.0661416	1	0.130538	1	0.0753117	1	0.10438	0.98524	0.0757205	1	0.0597937	1	0.0886935	1	0.142351	1	-0.0388604	1	-0.0431652	1	0.0153144	1	0.0715404	1	1	0.0625983	1	0.0891093	1	0.0434275	0.065045	0.0830179	FALSE
Akr1b10	-0.00152833	1	-0.0322094	1	-0.0208751	1	0.0610429	0.12362	0.0784971	1	0.0609905	1	0.0789475	1	0.0649253	1	0.0899939	1	0.0299251	1	0.189636	1	0.0751075	1	0.121915	1	0.0781928	1	0.10107	1	0.938808	0.0580604	1	0.0758083	1	0.0612573	0.065042	0.0688555	FALSE
Supt5	0.0934223	1	0.0174903	1	0.0712309	1	0.0483576	1	0.0707258	1	0.150615	1	0.0682844	1	0.00186427	1	0.0752955	1	0.206245	1	-0.136153	1	-0.0235812	1	0.155526	1	0.0295284	1	0.146051	1	1	0.114367	1	-0.00330874	1	0.0839222	0.0649934	0.0500597	FALSE
Fnip2	0.0605456	1	0.0516142	1	0.0404798	1	0.0556049	1	0.0376794	1	0.0181498	1	0.00606557	1	0.0324093	1	0.0561	1	0.0367598	1	0.0173702	1	0.0497967	1	0.0762089	1	0.121148	1	0.314339	1	1	0.0470369	1	0.0520442	1	0.095773	0.0649514	0.0108485	FALSE
Golph3l	0.097358	1	0.0391641	1	0.0426722	1	0.0449058	1	0.0246001	1	0.0983947	1	0.0517435	1	0.0302998	1	0.0775937	1	0.172152	1	0.0639198	1	0.086027	1	0.0369355	1	0.0533572	1	0.0549802	1	1	0.0806189	1	0.0422682	1	0.0719336	0.0649402	0.0550653	FALSE
Bnip3	-0.0529762	1	-0.116828	1	0.245641	1	0.0619755	1	0.146091	1	0.356921	0.000483355	0.0972545	1	0.114345	1	0.23629	1	-0.552939	1	-0.337605	1	0.101944	1	-0.0309625	1	0.281877	1	0.423042	1	1	-0.0955295	1	0.0175759	0.12254	0.272768	0.064938	-0.215583	FALSE
Iigp1	-0.0852396	1	-0.14761	0.0350834	0.312119	1	0.0423584	1	0.0249074	1	0.301582	1	0.0426704	1	-0.0448096	1	0.16636	0.0814347	-0.143909	1	0.338005	1	0.0984656	1	0.0202168	1	0.0797907	1	-0.0309321	1	1	-0.0247806	0.753425	0.0500566	0.890113	0.169519	0.0649317	0.151352	FALSE
Spaca6	0.0603174	1	0.0534653	0.748234	0.0411941	1	0.0609591	2.67995e-06	0.0798922	0.419492	0.0473052	1	0.0892342	0.000752296	0.0920749	0.00127864	0.151763	0.999836	-0.0306812	1	0.0679779	1	0.0566306	1	0.034803	1	0.0744969	1	0.0941279	1	1.66438e-05	0.0429265	0.110368	0.0735814	1	0.0782042	0.0649041	0.0564072	FALSE
Slc35e4	0.0166391	1	-0.0450794	1	-0.0742349	1	0.0681639	1	-0.0295531	1	-0.0286082	1	0.0876412	1	0.0290984	1	-0.00949912	1	0.410183	1	0.293456	1	0.198833	1	0.0936048	1	-0.0128422	1	-0.0263286	1	1	0.135246	1	0.0470159	1	0.0120324	0.0647649	0.0696765	FALSE
Frrs1	0.0348718	1	0.0709357	1	0.0758043	1	-9.42802e-05	1	0.120807	1	-0.004501	1	-0.00876962	1	0.114456	1	0.0586205	1	0.0721525	1	0.0900965	1	0.102223	1	0.0782433	1	0.250541	1	-0.084508	1	1	0.0352807	1	0.129367	1	0.0295279	0.0647252	0.0539109	FALSE
Xbp1	0.106307	1	0.0318778	1	0.0563308	1	0.0500533	1	0.030563	1	-0.00547569	1	0.123467	1	0.0205966	1	-0.00544322	1	0.122014	1	0.0339332	1	0.109717	1	0.160667	1	0.11083	1	0.0242829	1	1	0.112502	1	0.0455601	1	0.0358824	0.064648	0.089009	FALSE
Clip4	-0.123649	1	-0.050516	1	0.0666707	1	-0.0729313	1	-0.054547	1	0.0644003	1	0.0385207	1	0.0426673	1	-0.000912427	1	0.275426	1	0.217784	1	0.178662	1	0.157292	1	0.155216	1	0.0747338	1	1	0.0549318	1	0.0621208	1	0.0767109	0.0645878	0.0140811	FALSE
Clk1	0.0686419	1	0.015171	1	0.0871791	1	-0.0508296	1	-0.146467	1	-0.0773743	1	0.0312101	1	0.0195445	1	0.0982921	1	0.127491	1	0.0894644	1	0.0930057	1	0.12937	1	0.281355	1	0.200526	1	1	0.0611768	1	0.0518137	1	0.0803258	0.0644388	-0.00933182	FALSE
Acin1	0.00510074	1	0.0934954	1	0.117573	1	0.00499265	1	0.0517026	1	0.0834661	1	0.00956152	1	0.0305059	1	0.0928241	1	0.224115	1	0.0991611	1	0.0895627	1	0.00971342	1	0.063095	1	-0.0086304	1	1	0.0506966	1	0.067592	1	0.0749592	0.0644159	0.0636469	FALSE
Fmr1	-0.0226054	1	0.0179772	1	-0.0123629	1	0.02578	1	-0.00136177	1	0.000213018	1	0.0605109	1	0.0131502	1	0.00516765	1	0.175046	1	0.314309	1	0.110359	1	0.0900958	1	-0.0756315	1	0.26498	1	1	0.0657654	1	0.0536887	1	0.0736713	0.0643751	0.0502623	FALSE
Ddx1	0.175877	0.825002	0.0262604	1	-0.0010761	1	0.150763	5.68267e-06	0.019022	1	0.0698868	1	0.0549756	1	0.00272615	1	0.0146947	1	0.0334189	1	0.0930852	1	-0.0226745	1	0.0242461	1	0.16199	1	0.16233	1	0.00628705	0.0878561	1	0.0606168	1	0.0446321	0.0643683	0.00485912	FALSE
Nudt5	0.0546755	1	0.158445	0.000178824	0.0827608	1	0.0285555	1	0.0554144	1	0.0434904	1	-0.0503501	1	0.049627	1	0.0233144	1	0.208467	1	-0.0520114	1	0.195704	1	0.058811	1	0.138671	1	-0.0310648	1	1	0.0600317	0.0688421	0.0700293	1	0.0628411	0.0643007	0.0717558	FALSE
Snx9	0.0730736	1	0.0167413	1	0.0691491	1	0.0548557	1	0.103341	1	0.0340465	1	0.0960661	1	0.05862	1	0.0504962	1	0.0826733	1	0.166258	1	-0.0130985	1	0.0762485	1	-0.00258103	1	0.0975267	1	1	0.0765834	1	0.0684759	1	0.047624	0.0642278	0.0150611	FALSE
Hs6st1	0.200121	0.000549288	0.201591	3.91308e-07	0.164852	1	0.00220406	1	0.0142184	1	-0.0244425	1	0.0629886	1	0.117094	0.00600484	0.114445	1	0.112234	1	-0.0745778	1	0.0891409	1	-0.0730852	1	0.0588512	1	-0.00323625	1	0.13156	0.0608925	1.88431e-05	0.0634352	1	0.0681518	0.0641599	-0.0106377	FALSE
Bms1	0.128646	1	0.066776	1	0.119373	1	0.0873794	1	0.0168643	1	0.0367397	1	0.0966622	1	-0.0139599	1	0.0956789	1	0.161217	1	-0.0460688	1	0.138812	1	0.0498792	1	0.0190179	1	0.00461436	1	1	0.104757	1	0.00852591	1	0.0790436	0.0641088	0.0601162	FALSE
Pak2	0.0599309	1	-0.00944383	1	0.0803184	1	0.0684296	1	0.033922	1	0.138351	1	0.0663232	1	0.0161377	1	0.106874	1	-0.0352408	1	0.134751	1	0.0194582	1	0.052043	1	0.0470915	1	0.181617	1	1	0.0422972	1	0.0444917	1	0.105324	0.0640376	-0.00626592	FALSE
Gtf3c3	0.0436181	1	0.0586894	1	0.0749647	1	0.0481695	1	0.0200569	1	0.0829258	1	0.051091	1	0.027884	1	0.0478057	1	0.0899306	1	0.075961	1	0.053053	1	0.189012	1	0.0806359	1	0.0166731	1	1	0.0843642	1	0.0526454	1	0.0550845	0.0640314	0.0628268	FALSE
Tab2	0.0949174	1	0.0705133	1	0.092397	1	0.0134825	1	0.0211858	1	0.0753192	1	0.067854	1	0.0488771	1	0.0711209	1	0.0247663	1	0.0952471	1	0.108085	1	-0.0260861	1	0.0586525	1	0.143729	1	1	0.0349868	1	0.0588952	1	0.0981302	0.0640041	0.00431945	FALSE
Ttf1	0.0296807	1	0.0493203	1	0.03208	1	0.0303981	1	0.0445003	1	0.0071239	1	0.0544893	1	0.0279692	1	0.059784	1	0.0524602	1	0.0920591	1	0.0912402	1	0.0741901	1	0.046518	1	0.268196	1	1	0.0482437	1	0.0520734	1	0.0916848	0.0640006	0.0682555	FALSE
Tmem65	0.0829829	1	0.0598224	1	0.0570398	1	0.0231492	1	0.0491748	1	0.00554577	1	0.0344982	1	0.0299128	1	0.0374134	1	0.0805524	1	0.18663	1	0.0567384	1	0.0580941	1	-0.0200987	1	0.21786	1	1	0.0558554	1	0.0610883	1	0.0749194	0.0639544	0.0675306	FALSE
Med7	0.102437	1	0.0116034	1	0.0136152	1	0.0299589	1	0.0381016	1	-0.0267161	1	0.0723514	1	0.0491634	1	0.0845716	1	0.160376	1	0.218291	1	0.0509474	1	0.0673879	1	0.0810624	1	0.00591447	1	1	0.0865022	1	0.0796444	1	0.0256665	0.0639377	0.0514336	FALSE
Crip2	0.405084	2.62412e-07	0.273896	4.62968e-13	0.143082	1	0.0135697	1	-0.00122577	1	-0.0421058	1	-0.024789	1	-0.00761253	1	-0.118463	1.4118e-05	0.06306	1	-0.0572365	1	0.212232	1	0.188025	1	-0.0600336	1	-0.0292244	1	0.000763058	0.12899	1.45191e-08	0.0295574	0.0134809	0.0331042	0.0638839	0.0570494	FALSE
Pkn2	0.0687999	1	0.0578623	1	0.0851394	1	0.0697841	1	0.0134864	1	-0.0789919	1	-0.0199306	1	-0.0177559	1	0.0464256	1	0.000348524	1	-0.011002	1	0.225225	1	0.103178	1	-0.0306179	1	0.445539	1	1	0.044436	1	0.0023946	1	0.144667	0.0638327	-0.0515785	FALSE
Casp8ap2	0.129761	1	0.0550309	1	0.108946	1	0.0609257	1	0.0638042	1	0.100227	1	0.0144148	1	-0.019655	1	0.0773212	1	0.112554	1	-0.0307671	1	0.150556	1	-0.055405	1	0.0331449	1	0.156137	1	1	0.0524502	1	0.0203116	1	0.118637	0.0637997	0.0991534	FALSE
Phf6	0.0196953	1	0.100707	0.473773	0.101365	1	0.0261716	1	0.06178	1	0.0595632	1	0.100938	1	0.0424582	1	0.0924839	1	0.123104	1	0.165637	1	0.097189	1	0.0136898	1	-0.0183254	1	-0.029819	1	1	0.0567198	0.998954	0.0704513	1	0.0641563	0.0637758	0.0863619	FALSE
Htra1	0.274895	0.0193168	0.446777	6.31456e-33	0.128288	1	0.0373545	1	0.101863	1	0.0327193	1	-0.0949388	1	0.00353241	1	-0.00120832	1	0.00880818	1	0.123781	1	0.0465415	1	-0.146347	1	0.073946	1	-0.0812433	1	0.639233	0.0159544	8.39736e-27	0.14998	1	0.0250194	0.0636512	0.0769986	FALSE
Stbd1	-0.0597726	1	-0.00866729	1	0.0462868	1	0.0125597	1	0.096412	1	0.0159993	1	0.0337814	1	0.093044	1	0.100229	1	-0.00241749	1	0.0491053	1	0.0526636	1	0.173252	1	0.0114642	1	0.340577	1	1	0.0314805	1	0.0482716	1	0.111151	0.0636345	0.0424253	FALSE
Egln3	0.0441917	1	-0.0595721	1	0.172907	1	0.087829	1	0.120869	1	0.307581	1	0.100592	1	0.127591	1	0.0618653	1	-0.152429	1	-0.0976245	1	0.35915	1	-0.0808567	1	0.00962177	1	-0.0472612	1	1	-0.000134687	1	0.0201772	1	0.170849	0.0636304	-0.015208	FALSE
Gopc	0.0293428	1	0.0317406	1	0.048461	1	0.0566583	1	0.00134996	1	0.0690058	1	0.072287	1	0.027686	1	0.0287437	1	0.0315268	1	0.17124	1	0.0906245	1	0.104236	1	0.0658047	1	0.12459	1	1	0.0588102	1	0.0595642	1	0.072285	0.0635531	0.0567462	FALSE
Ccni	0.11815	1	0.0847637	1	0.0741284	1	0.144705	1.03666e-06	0.0788866	1	0.0385123	1	0.151368	0.00040608	0.100489	1	0.0583794	1	0.0457736	1	0.0471416	1	-0.142288	1	0.105128	1	0.13954	1	-0.0919382	1	4.62352e-06	0.113025	1	0.0901643	1	-0.0126412	0.063516	-0.0318277	FALSE
Cr1l	0.0951542	1	0.0521091	1	0.100568	1	0.0435053	1	0.0661386	1	-0.0393647	1	0.0956569	0.384668	0.0520151	1	0.0524901	1	0.222129	1	0.0611035	1	0.0801314	1	0.0888266	1	0.0773687	1	-0.0954023	1	0.99698	0.109054	1	0.061747	1	0.0196845	0.0634953	0.107282	FALSE
Antxr1	0.011548	1	-0.0148422	1	-0.0256879	1	0.0393507	1	0.0826828	1	0.0436033	1	0.0302458	1	0.0365439	1	-0.0296019	1	-0.0514291	1	0.260168	1	-0.00799545	1	0.244823	1	0.271564	1	0.0610355	1	1	0.0549076	1	0.127223	1	0.00827073	0.0634672	0.061584	FALSE
Hmgcr	0.0967903	1	0.090194	1	0.0547033	1	0.167136	1.17167e-06	0.114064	1	-0.0729221	1	0.100154	1	0.088785	1	0.0414178	1	0.231933	1	0.043397	1	0.114407	1	0.11001	1	0.0391272	1	-0.267777	1	0.0023222	0.141205	1	0.0751135	1	-0.0260342	0.063428	0.0925793	FALSE
Mrpl52	-0.0340051	1	-0.115233	1	0.139836	1	-0.000978348	1	0.0479345	1	0.114072	1	0.0724035	1	0.0466086	1	0.0910386	1	0.10575	1	0.165248	1	0.0613747	1	0.115906	1	0.091782	1	0.0492136	1	1	0.0518152	1	0.047268	1	0.091107	0.0633967	-0.274073	FALSE
Rpl34	-0.0814534	1	0.121376	0.0111592	0.150377	0.0274309	-0.00291378	1	0.0921354	1	0.231527	1.34117e-10	-0.0900707	0.00320683	0.0911459	0.000164413	0.20145	9.56125e-27	-0.138251	1	-0.184359	1	0.160137	1	-0.101742	1	0.162536	1	0.338702	0.0215323	0.321004	-0.0828862	0.00321775	0.0565667	2.17322e-33	0.216439	0.063373	-0.388963	FALSE
Bnip1	0.0105469	1	0.00409759	1	0.112421	1	0.00904028	1	0.0277029	1	0.0820747	1	-0.0115485	1	0.009917	1	0.0276757	1	0.0254423	1	0.0403092	1	0.129445	1	0.0476363	1	0.108505	1	0.326389	1	1	0.0162235	1	0.0381063	1	0.135601	0.0633103	0.0464128	FALSE
Acadm	0.142322	1	0.0264559	1	0.0401187	1	0.16522	2.05179e-07	0.0329626	1	0.0680769	1	0.147272	0.0931197	0.0550217	1	0.0517934	1	0.190333	1	-0.118197	1	-0.0381737	1	0.102445	1	-0.096686	1	0.180556	1	0.000100693	0.149518	1	-0.0200886	1	0.0604742	0.0633013	0.102973	FALSE
Capn15	0.0851146	1	0.048353	1	0.00457808	1	0.0325463	1	0.0693792	1	-0.0189375	1	0.040626	1	0.0397878	1	0.108729	1	0.0945801	1	0.029822	1	0.16761	1	0.121685	1	0.101897	1	0.0233717	1	1	0.0749105	1	0.0578479	1	0.0570703	0.0632762	0.0834885	FALSE
Tet3	0.0959443	1	0.071379	1	0.0585469	1	0.0796354	0.0105623	0.122313	0.581182	0.062705	1	0.07269	1	0.0798007	1	0.0896633	1	0.0980277	1	0.0790582	1	0.0371021	1	0.123293	1	-0.0137626	1	-0.107469	1	0.522553	0.0939181	0.99975	0.0677577	1	0.0281096	0.0632618	0.0674067	FALSE
Chd9	0.148841	1	0.0613299	1	0.0475701	1	0.0601084	1	0.0427359	1	0.024629	1	0.0949934	0.365179	0.0569337	1	0.00804516	1	0.200806	1	0.0438271	1	0.00884463	1	0.087464	1	0.141912	1	-0.0799342	1	0.996226	0.118443	1	0.0693477	1	0.00183093	0.0632071	0.100573	FALSE
Cop1	0.0288039	1	0.0586785	1	0.0260341	1	0.0582984	1	0.0257081	1	0.0121251	1	0.0619355	1	0.0499474	1	0.0292389	1	0.101818	1	0.275009	1	-0.030165	1	0.108035	1	-0.00158154	1	0.144099	1	1	0.0717782	1	0.0815523	1	0.0362664	0.063199	0.0433218	FALSE
Socs5	0.0681806	1	0.190486	3.02665e-09	0.064616	1	0.0557602	1	0.0817208	1	0.0143135	1	0.10952	0.000393163	0.0618568	1	0.0448441	1	0.108911	1	-0.000205944	1	-0.0132564	1	0.208475	1	0.0584994	1	-0.106274	1	0.109087	0.110169	2.31234e-05	0.0784714	1	0.000848638	0.0631631	0.0652609	FALSE
Colgalt1	0.00792791	1	0.0599941	1	0.0427607	1	0.0168736	1	0.0486724	1	0.0194278	1	0.0184062	1	0.00562625	1	0.0907382	1	0.201149	1	0.0941689	1	0.186393	1	0.163291	1	-0.0277277	1	0.0192886	1	1	0.0815295	1	0.0361468	1	0.0717217	0.0631327	0.0643614	FALSE
Tars	0.0172323	1	0.108013	1	0.146324	1	0.0192649	1	0.089715	1	0.160381	1	0.0600692	1	0.109537	1	0.117609	1	0.0622088	1	-0.133396	1	0.307727	1	-0.0596251	1	-0.137348	1	0.0786407	1	1	0.01983	1	0.00730442	1	0.162136	0.0630902	0.0556837	FALSE
Tbc1d5	0.0484901	1	0.0660188	0.871777	0.0765552	1	0.028299	1	0.00253405	1	0.0376453	1	0.0313336	1	0.0394307	1	0.0356226	1	0.0930344	1	0.180943	1	0.0905291	1	0.0939526	1	0.0827586	1	0.0390307	1	1	0.0590219	1	0.0743371	1	0.0558766	0.0630785	0.0358546	FALSE
Arpc2	0.109442	1	-0.150719	0.00864919	0.0219004	1	0.0305703	1	0.000521949	1	0.00138688	1	0.133938	0.00513792	0.023255	1	-0.0624813	1	0.138272	1	0.275323	1	0.0534114	1	0.180025	1	0.062844	1	0.126426	1	0.394277	0.11845	0.485344	0.042245	1	0.0281287	0.0629411	0.116599	FALSE
Csnk2a1	0.0489884	1	0.130232	0.00207004	0.0250639	1	0.082971	0.0843291	0.132626	1	0.0649552	1	0.093704	0.828851	0.0565054	1	0.0561281	1	0.124655	1	-0.0346349	1	0.122491	1	0.137623	1	0.0127926	1	-0.110197	1	0.868694	0.0975881	0.261662	0.0595042	1	0.0316882	0.0629269	0.00425083	FALSE
Lims1	0.0822872	1	0.0609106	1	-0.00713366	1	0.0953483	0.00610701	0.0758572	1	0.0501265	1	0.0755063	0.716192	0.0417796	1	-0.0491405	1	0.108223	1	0.00982329	1	-0.0174737	1	0.134552	1	0.0644216	1	0.217249	1	0.368192	0.0991834	1	0.0505585	1	0.0387256	0.0628225	0.124251	FALSE
Trmt10a	0.00513444	1	0.0926933	1	0.0124768	1	0.096842	0.133173	0.0831484	1	0.0384104	1	-0.0376959	1	0.109134	0.245001	0.0700124	1	0.226776	1	0.0935729	1	0.0587142	1	0.197152	1	0.111705	1	-0.21627	1	0.945882	0.0976419	0.985489	0.0980508	1	-0.00733122	0.0627871	0.0305911	FALSE
Fam208a	-0.00253706	1	0.0372785	1	0.0496633	1	0.0292258	1	0.0935642	1	0.0648206	1	0.031487	1	0.0495023	1	0.0853747	1	-0.00759604	1	0.133561	1	0.0942714	1	-0.0062903	1	0.0469453	1	0.242213	1	1	0.00885787	1	0.0721703	1	0.107269	0.0627656	0.0799626	FALSE
2310009B15Rik	0.0457451	1	-0.224559	6.01048e-06	0.187481	1	0.0443252	1	0.0396102	1	0.0753028	1	0.104632	0.700426	0.057095	1	0.0934509	1	-0.027911	1	0.197042	1	0.0603965	1	0.0860855	1	0.0582299	1	0.14345	1	0.999965	0.0505753	0.00748443	0.0254836	1	0.112016	0.0626917	-0.0723603	FALSE
G2e3	0.108885	1	0.0843412	0.872326	0.150462	1	0.0994677	1	0.0380672	1	0.0389269	1	0.032486	1	0.0607442	1	0.131894	1	0.0347593	1	-0.0329792	1	0.154298	1	0.0700322	1	0.0820783	1	-0.113376	1	1	0.069126	1	0.0464503	1	0.0724409	0.0626724	0.0462414	FALSE
Etnk1	0.0315692	1	0.03778	1	0.0667167	1	0.0459157	1	0.0028252	1	0.0560624	1	0.046385	1	0.0663855	1	0.135157	1	0.199383	1	0.0859481	1	0.108942	1	-0.085537	1	0.160999	1	-0.018859	1	1	0.0475432	1	0.0707876	1	0.069604	0.0626449	0.0884035	FALSE
Atp2a2	0.266358	0.111224	0.0718342	1	0.175094	1	0.102705	0.235619	-0.0311023	1	0.00101077	1	0.132085	1	0.0259455	1	0.0274098	1	-0.0174608	1	0.0485465	1	0.140149	1	0.105974	1	0.0307949	1	-0.140885	1	0.698438	0.117932	1	0.0292038	1	0.0405558	0.0625639	0.045143	FALSE
Gatad2b	0.0520396	1	0.0828691	1	0.0734545	1	0.0782535	1	0.0783781	1	0.0691615	1	0.0953897	1	0.069732	1	0.140275	1	-0.0155026	1	0.0128589	1	0.110156	1	0.0982707	1	-0.0188831	1	0.00954658	1	1	0.0616902	1	0.044991	1	0.0805187	0.0624	0.0664374	FALSE
Msl3	0.0131963	1	0.0137777	1	0.0901088	1	0.0686902	1	0.110093	1	0.139349	1	0.0325227	1	0.0101583	1	0.017362	1	0.232394	1	0.221722	1	0.166096	1	0.0713278	1	-0.0725113	1	-0.178872	1	1	0.0836262	1	0.0566478	1	0.0468087	0.0623609	0.0628133	FALSE
Chic2	-0.0172191	1	0.0248496	1	0.00145438	1	-0.059133	1	0.0742938	1	0.0762634	1	0.0198438	1	0.064656	1	0.0276727	1	0.127841	1	0.129509	1	0.151985	1	0.0572732	1	0.0941116	1	0.161235	1	1	0.0257211	1	0.077484	1	0.0837222	0.0623091	0.0160769	FALSE
Gm26518	0.0111844	1	0.0404903	1	0.0663265	1	0.0256253	1	0.0951784	1	0.033341	1	0.0541959	1	0.0517224	1	0.0611936	1	0.0411648	1	0.0430151	1	0.0743279	1	-0.00582553	1	0.127009	1	0.215426	1	1	0.025269	1	0.0714831	1	0.0901231	0.0622917	0.0500386	FALSE
Strbp	0.0660013	1	0.176162	1.6257e-09	0.0680326	1	0.0623026	1	0.0398454	1	0.0154546	1	0.0320452	1	0.0494237	1	0.0944454	1	0.0563429	1	0.240384	1	0.130607	1	-0.0997278	1	0.02481	1	-0.0228096	1	1	0.0233929	1.39748e-05	0.106125	1	0.0571461	0.0622213	0.0160307	FALSE
Dph6	0.100358	1	0.0539281	1	0.0815717	1	0.0752537	0.482701	0.0194131	1	0.0537014	1	0.0906793	1	0.0268827	1	0.0535127	1	0.102414	1	0.0475018	1	0.0578684	1	0.0725891	1	0.0060067	1	0.0912621	1	0.999064	0.0882589	1	0.0307465	1	0.0675833	0.0621962	-0.00501423	FALSE
Fam76b	0.0212407	1	0.0362466	1	0.0333367	1	0.0863315	0.0111954	0.0946217	1	0.121504	1	0.11301	0.00156169	0.0560055	1	0.0560396	1	0.122049	1	-0.0213585	1	-0.0630728	1	0.0596697	1	0.0723852	1	0.14462	1	0.0155777	0.0804603	1	0.0475801	1	0.0584857	0.0621754	0.0655582	FALSE
Gphn	0.134991	1	0.0728483	1	0.0713397	1	0.0830181	0.761678	0.0766295	1	0.0379169	1	0.0265821	1	0.0396466	1	0.0722565	1	-0.1149	1	0.139274	1	0.0152001	1	0.167256	1	-0.0014568	1	0.111271	1	0.99999	0.0593896	1	0.0653883	1	0.0615969	0.0621249	0.0377965	FALSE
Hdac6	-0.00283383	1	0.0722506	1	0.100068	1	0.0213093	1	0.0387228	1	0.0871112	1	0.0445297	1	0.00875473	1	0.04532	1	0.227065	1	0.039251	1	0.175381	1	-0.00637919	1	0.0323751	1	0.0488149	1	1	0.0567382	1	0.0382708	1	0.091339	0.062116	0.0259792	FALSE
Zcchc11	0.171737	0.0259611	0.0927993	0.133435	0.0776837	1	0.0754423	1	-0.0517379	1	0.0944458	1	0.157797	1.49159e-06	0.0547624	1	0.126165	1	-0.0311557	1	-0.161112	1	0.146336	1	0.115437	1	0.116543	1	-0.0537847	1	0.000175312	0.0978515	0.946062	0.0102509	1	0.0781691	0.0620905	0.0754786	FALSE
Ep400	0.0800225	1	0.0900176	0.525963	0.101271	1	0.0640199	1	0.049551	1	-0.0172287	1	0.0368631	1	0.0110189	1	0.0667692	1	0.211758	1	0.0729285	1	0.175307	1	0.169886	1	-0.0320673	1	-0.149275	1	1	0.11251	0.999463	0.0382897	1	0.0353686	0.062056	0.0961901	FALSE
Myo10	0.112907	1	0.0449791	1	0.086526	1	0.00142953	1	0.0444609	1	0.101378	1	-0.0241165	1	0.0116579	1	0.0640625	1	0.178349	1	0.119785	1	0.0451256	1	0.0996669	1	0.0927773	1	-0.0498093	1	1	0.073647	1	0.062732	1	0.0494565	0.0619452	0.0528689	FALSE
Esd	0.0772696	1	0.104212	1	0.0446168	1	0.0747714	1	-0.0734234	1	-0.0564173	1	-0.0322349	1	-0.064333	1	-0.0643995	1	0.36383	1	0.150499	1	0.369462	1	0.192138	1	-0.0666088	1	-0.0904527	1	1	0.135155	1	0.0100691	1	0.0405619	0.0619286	0.183406	FALSE
Pcmtd2	0.0399679	1	0.0386952	1	0.0212925	1	0.0574971	0.0883412	0.0891792	1	0.059942	1	0.082858	0.0395962	0.0634792	0.384118	0.0459353	1	0.0621533	1	0.121536	1	0.010302	1	0.0788766	1	0.00359398	1	0.152373	1	0.333797	0.0642706	0.99696	0.0632966	1	0.0579689	0.0618454	0.029505	FALSE
Egln1	0.0726093	1	-0.14538	1	0.124333	1	0.0600852	1	0.0181485	1	0.105043	1	0.0643489	1	0.0487723	1	0.194911	1	-0.188882	1	-0.0108882	1	0.0686111	1	-0.100087	1	0.229525	1	0.386336	1	1	-0.0183853	1	0.0280356	1	0.175847	0.0618324	0.00088371	FALSE
Glrx2	0.116526	1	-0.0160638	1	0.08176	1	0.0359083	1	0.0613099	1	0.054188	1	0.147776	0.0373107	0.0284386	1	0.00733922	1	-0.0129975	1	0.0075355	1	0.142491	1	0.128033	1	0.0330096	1	0.110935	1	0.764688	0.0830492	1	0.022846	1	0.0793426	0.0617459	0.117646	FALSE
Arid5a	0.0531819	1	0.00132986	1	0.029899	1	0.0817012	0.0562609	0.0657451	1	0.0179789	1	0.122595	0.0111073	0.0676131	1	0.0493252	1	-0.0260712	1	0.260994	1	-0.0242407	1	0.0438816	1	0.128755	1	0.053159	1	0.141221	0.0550578	1	0.104887	1	0.0252243	0.0617231	0.0335729	FALSE
Dnajc19	0.129415	1	0.0212916	1	0.113667	1	0.0750067	1	0.0412714	1	0.0935989	1	0.0166634	1	0.0455896	1	0.0436885	1	0.275886	1	-0.0752768	1	0.0827645	1	-0.00306566	1	-0.00587571	1	0.0706669	1	1	0.0987811	1	0.00540001	1	0.0808771	0.0616861	0.0824116	FALSE
Fbxo6	0.0456122	1	0.0411432	1	-0.00732865	1	0.0841598	1	0.110974	1	-0.0339667	1	0.0397837	1	0.113119	0.0588945	-0.0105817	1	0.0973624	1	0.308621	1	0.071419	1	0.169698	1	0.0495627	1	-0.154908	1	1	0.0873233	0.842657	0.124684	1	-0.0270731	0.0616448	0.0200862	FALSE
Dnajc30	0.047404	1	0.02082	1	0.0290783	1	0.053125	1	0.0106668	1	0.07731	1	0.0597185	1	0.0305813	1	0.00799427	1	0.15569	1	0.112382	1	0.0349947	1	0.0794441	1	-0.0179223	1	0.222357	1	1	0.0790762	1	0.0313057	1	0.0743469	0.0615763	0.0575145	FALSE
Pdlim7	0.133623	1	0.148346	0.00475551	0.0548061	1	-0.0289272	1	0.1016	1	0.0573709	1	-0.0264288	1	0.0904903	0.332558	0.0186047	1	0.0335306	1	0.0650755	1	-0.0199601	1	-0.0610218	1	0.264061	1	0.09173	1	1	0.0101551	0.229386	0.133915	1	0.0405103	0.0615266	0.079427	FALSE
Nras	0.0235061	1	0.0642989	1	0.0279783	1	0.0469624	1	0.0516023	1	0.0940431	1	0.0659429	1	0.0796848	1	0.0381633	1	-0.0285323	1	-0.123055	1	-0.0451483	1	0.115031	1	0.0987455	1	0.41302	1	1	0.044582	1	0.0342553	1	0.105611	0.0614829	0.0805775	FALSE
Btbd7	0.13906	1	0.125878	0.432668	0.119968	1	0.0901249	0.104766	0.0735252	1	0.0267471	1	0.0758477	1	0.0489331	1	0.0771756	1	-0.103931	1	0.0718398	1	0.23346	1	-0.0444097	1	-0.00998	1	-0.00213086	1	0.921306	0.0313386	0.998276	0.0620393	1	0.0910439	0.0614739	0.0270643	FALSE
Aars	0.0891687	1	0.211129	1.11587e-06	0.238081	0.207582	0.0339829	1	0.0245515	1	0.0580345	1	0.0751383	1	0.0830261	1	0.149774	1	-0.10035	1	-0.110345	1	0.278921	1	-0.0548639	1	0.125702	1	-0.180314	1	1	0.00861518	0.00224075	0.0668129	0.977817	0.108899	0.0614425	0.0108537	FALSE
Mpdz	0.107441	1	0.0541162	1	0.0879517	1	0.056047	1	0.035042	1	0.0294096	1	0.0372622	1	0.0286635	1	0.00594883	1	0.211014	1	0.141601	1	0.0298096	1	0.0494342	1	0.0275125	1	0.0203154	1	1	0.0922398	1	0.0573871	1	0.034687	0.061438	0.0578634	FALSE
Gpt2	0.111709	0.0472722	0.140942	4.65316e-07	0.146218	0.0932341	0.0311516	0.792368	0.053978	1	0.0737754	1	0.0177839	1	0.0521456	0.493783	0.0705021	1	-0.0222446	1	-0.012544	1	0.169572	1	0.0033746	1	0.0303933	1	0.0535112	1	0.765399	0.028355	0.000690093	0.0529829	0.907531	0.102716	0.0613512	0.0214257	FALSE
Rpl30	0.00349924	1	0.109994	0.0308765	0.122474	1	0.0229905	1	0.0989112	1	0.203787	3.78818e-06	-0.074964	1	0.0728938	0.525836	0.0617586	1	-0.0389297	1	-0.0398973	1	0.135316	1	-0.0199822	1	0.157125	1	0.104945	1	1	-0.0214772	0.605304	0.0798054	0.00540793	0.125656	0.0613281	-0.23313	FALSE
Git1	0.0938519	1	0.0546368	1	0.0435042	1	0.015412	1	0.0442217	1	0.0269629	1	0.0361036	1	0.0234464	1	0.00564728	1	0.219562	1	0.241129	1	-0.0143138	1	0.0314387	1	0.103345	1	-0.00535717	1	1	0.0792736	1	0.0933558	1	0.0112887	0.061306	0.0362425	FALSE
Rreb1	0.0271741	1	0.0453523	1	0.061885	1	0.0227707	1	0.0600002	1	0.0211834	1	0.0289569	1	0.105494	3.69364e-06	0.0698397	1	0.0645117	1	0.0393723	1	0.183861	1	0.0565186	1	0.127792	1	0.00462515	1	1	0.0399864	0.00531188	0.0756021	1	0.0682788	0.0612891	0.0185749	FALSE
2410089E03Rik	0.0520058	1	0.0396984	1	0.0288983	1	0.0994926	0.00014273	0.0423014	1	0.0726616	1	0.0403305	1	0.0205455	1	0.0264441	1	0.0773544	1	0.146621	1	0.012778	1	0.108137	1	-0.00196647	1	0.153354	1	0.0600733	0.075464	1	0.0494399	1	0.0588273	0.0612437	0.0502343	FALSE
Rexo1	0.0494851	1	0.038206	1	0.0316274	1	0.0430354	1	0.122997	1	0.0343357	1	0.0211715	1	0.0248646	1	0.0473614	1	0.034961	1	-0.00523512	1	0.120286	1	0.180298	1	0.00613718	1	0.166818	1	1	0.0657902	1	0.037394	1	0.0800857	0.06109	0.0653901	FALSE
Nr4a1	-0.0976555	1	0.170228	0.178178	-0.127675	1	0.0719219	0.382233	0.0907111	1	-0.155792	1	0.267905	4.45553e-09	0.11865	1	-0.0351436	1	0.266427	1	0.383371	1	0.145067	1	0.311472	1	-0.0356615	1	-0.458085	1	1.45129e-05	0.164014	0.968771	0.14546	1	-0.126326	0.0610494	0.330947	FALSE
Apip	0.0310259	1	0.100823	0.584359	-0.0360076	1	0.0489825	1	0.0686364	1	-0.0272357	1	0.0502725	1	0.0808058	1	0.0641536	1	0.142165	1	0.249601	1	0.0791709	1	-0.0515353	1	0.15929	1	-0.0445727	1	1	0.0441821	0.999761	0.131831	1	0.0071017	0.0610383	0.104652	FALSE
Smim13	0.093425	1	0.0831453	0.107758	0.0401019	1	0.0497948	1	0.0813361	1	0.0406313	1	0.0689203	1	0.056067	1	0.00811587	1	0.124524	1	-0.0483691	1	0.0831267	1	0.161678	1	-0.0256529	1	0.0975754	1	1	0.0996685	0.924456	0.0293053	1	0.0539102	0.0609613	0.048851	FALSE
Tmem237	0.123383	1	0.0430745	1	0.0427522	1	0.129327	1.50315e-05	0.037653	1	-0.0369793	1	0.0895785	1	0.00196234	1	0.0240344	1	0.0881987	1	0.0823594	1	0.0916485	1	0.17407	1	0.154615	1	-0.131773	1	0.0140664	0.120911	1	0.0639329	1	-0.0020634	0.060927	0.117777	FALSE
Mxd4	0.0398276	1	-0.001237	1	-0.086968	1	0.132243	3.07347e-05	0.144743	0.890104	-0.105332	1	0.23156	7.05864e-08	0.103923	1	-0.047995	1	0.195742	1	0.239925	1	-0.122139	1	0.346039	1	0.109298	1	-0.267708	1	5.48731e-08	0.189082	1	0.11933	1	-0.126028	0.0607948	0.126183	FALSE
Jkamp	0.07521	1	0.0673167	1	0.0404402	1	0.0539621	1	0.0705293	1	0.0522527	1	0.0405013	1	0.0527255	1	0.0527969	1	-0.0282155	1	0.155942	1	0.0964257	1	0.0691428	1	0.0908804	1	0.0214996	1	1	0.0421201	1	0.0874789	1	0.052683	0.0607607	0.0687144	FALSE
Wwp1	0.109112	1	0.0487826	1	0.0605389	1	0.0448954	1	0.0525388	1	-0.0183002	1	0.0826296	0.133024	0.0456393	1	0.044563	1	0.105425	1	0.0325499	1	-0.0187781	1	0.103137	1	0.122187	1	0.096279	1	0.94578	0.0890398	1	0.0603395	1	0.0328605	0.0607466	0.0165635	FALSE
Ebp	-0.13511	1	-0.0241407	1	0.00470191	1	0.0855363	1	0.00989057	1	-0.0891345	1	0.18514	0.0151592	0.0605052	1	-0.0858464	1	0.320615	1	0.295386	1	-0.129671	1	0.25949	1	0.156731	1	-0.00302814	1	0.591937	0.143134	1	0.0996744	1	-0.0605957	0.0607377	0.207491	FALSE
Myo5a	0.0218274	1	0.0620492	1	0.024007	1	0.0548924	1	0.0154338	1	0.0380613	1	0.0713862	1	0.0584625	1	0.0735934	1	0.103059	1	0.0180882	1	-0.00252953	1	0.095436	1	0.131123	1	0.146053	1	1	0.0693201	1	0.0570314	1	0.055837	0.0607295	0.0590594	FALSE
Gemin7	0.0680347	1	0.044427	1	0.0100274	1	-0.00178265	1	0.035783	1	0.0275814	1	0.0285728	1	0.0321117	1	-0.0142093	1	0.278149	1	0.161659	1	-0.0269104	1	0.0753394	1	0.122803	1	0.0692371	1	1	0.0896627	1	0.0793567	1	0.0131452	0.0607215	0.0893713	FALSE
Chordc1	0.047366	1	0.14075	0.000145487	0.112245	1	-0.0302397	1	-0.0426874	1	0.0213659	1	0.0309448	1	0.103435	1	0.134626	1	-0.0116549	1	0.263873	1	0.14612	1	0.00959928	1	-0.0319083	1	0.0164222	1	1	0.00920311	0.0607763	0.0866924	1	0.086156	0.0606838	0.0239408	FALSE
Zc3h18	0.130031	1	0.038897	1	0.122216	1	0.04952	1	0.0234933	1	0.067531	1	0.0092493	1	-0.0236251	1	0.0399531	1	0.115137	1	0.0173755	1	0.177719	1	0.117733	1	0.0922392	1	-0.0672352	1	1	0.0843341	1	0.029676	1	0.0680367	0.0606822	0.0727796	FALSE
Erg28	0.10192	1	0.055903	1	0.0555916	1	0.0731687	1	0.102766	1	0.018847	1	0.0308571	1	-0.00960293	1	0.0378173	1	0.155682	1	0.0772384	1	0.222333	1	-0.0410361	1	-0.00371894	1	0.0317065	1	1	0.0641185	1	0.044517	1	0.073259	0.0606315	0.0978414	FALSE
Git2	0.123877	1	0.0895755	1	0.130518	1	0.0727378	1	0.091852	1	0.118761	1	0.0660143	1	0.0244425	1	0.0502153	1	0.0188046	1	0.0339049	1	0.0370163	1	0.00475347	1	0.060433	1	-0.0143264	1	1	0.0572374	1	0.0600416	1	0.0644368	0.0605719	0.0454406	FALSE
Pnisr	0.122126	1	-0.0138049	1	-0.0303823	1	0.0608715	1	-0.0186516	1	-0.00186806	1	0.118599	0.111034	0.114286	0.185328	0.0373746	1	0.193146	1	0.00157691	1	0.119321	1	0.0741698	1	0.0341593	1	0.0973458	1	0.927728	0.113782	0.97129	0.023513	1	0.0443582	0.0605512	0.0798018	FALSE
Trpc4ap	0.0112939	1	0.0521334	1	0.0278708	1	0.0498614	1	0.0217213	1	-0.000567923	1	0.0165207	1	0.0314755	1	0.0384192	1	0.157032	1	0.101387	1	0.141328	1	-0.0125627	1	0.0834596	1	0.188224	1	1	0.0444291	1	0.0580354	1	0.0790547	0.0605064	0.0525472	FALSE
Fyttd1	0.0959336	1	0.014229	1	0.0403069	1	0.0496087	1	0.0277399	1	0.0542469	1	0.0784245	1	0.0379759	1	0.0390616	1	-0.0281544	1	0.0217176	1	-0.0835388	1	0.112739	1	0.222892	1	0.22375	1	1	0.0617104	1	0.0649109	1	0.0547653	0.0604622	0.0270836	FALSE
Tnfrsf23	0.0422945	1	0.0435856	1	0.110191	1	0.0389363	1	0.111722	1	0.106075	1	0.0249189	1	0.0604385	1	0.088004	1	0.00311597	1	-0.00285674	1	0.0735932	1	0.0128646	1	0.0966897	1	0.0973312	1	1	0.024426	1	0.0619159	1	0.0950388	0.0604602	0.0249857	FALSE
Shoc2	0.0611102	1	0.0502693	1	0.03615	1	0.0390702	1	0.0282948	1	0.00589969	1	0.0191189	1	0.052954	1	0.0303083	1	0.114582	1	0.237692	1	-0.0489487	1	0.149181	1	0.0293639	1	0.101606	1	1	0.0766123	1	0.0797147	1	0.0250031	0.0604434	-0.0482008	FALSE
Tia1	0.0501197	1	0.0925953	1	0.0417075	1	0.0281724	1	0.0331966	1	-0.022828	1	0.049138	1	0.0496658	1	0.0403695	1	0.163829	1	0.225337	1	0.0874354	1	0.0587455	1	0.0135657	1	-0.00442126	1	1	0.070001	1	0.082872	1	0.0284526	0.0604419	0.0855428	FALSE
Rnf121	0.0967035	1	0.017437	1	0.0470573	1	0.0936151	0.0124988	0.0529871	1	-0.00185685	1	0.0948739	1	0.0731202	1	0.0860154	1	0.0238188	1	0.0865864	1	0.130952	1	0.107184	1	0.0175269	1	-0.0194384	1	0.554614	0.0832391	1	0.0495315	1	0.0485459	0.0604388	0.0986001	FALSE
Fosl2	0.215213	1	0.118249	0.338976	0.00283269	1	0.133253	0.000155999	-0.0156484	1	0.00886483	1	0.227658	4.56065e-08	0.0713894	1	0.016963	1	0.0701243	1	-0.035784	1	-0.1349	1	0.118295	1	0.0210716	1	0.0881557	1	1.51285e-07	0.152909	0.994925	0.0318555	1	-0.00361675	0.0603825	0.0906143	FALSE
Syngr2	0.087216	1	0.0683414	1	0.148088	1	-0.00721633	1	0.00311593	1	-0.00693579	1	-0.0173288	1	-0.032673	1	-0.00347274	1	0.22652	1	0.178068	1	0.135899	1	0.151419	1	-0.105417	1	0.0786187	1	1	0.088122	1	0.0222872	1	0.0704394	0.0602829	0.111043	FALSE
Fbxw7	0.0673635	1	0.0712204	1	0.053199	1	0.0515714	1	-0.0039926	1	0.0571628	1	0.0618497	1	0.0407678	1	0.0221431	1	0.0876609	1	0.151534	1	0.0946708	1	0.0980499	1	0.033122	1	0.0177945	1	1	0.0732991	1	0.0585303	1	0.0489941	0.0602745	0.0755479	FALSE
Nvl	0.0738507	1	0.0519995	1	0.0469751	1	0.109694	1	0.0729805	1	0.0355293	1	0.0540262	1	-0.0387857	1	0.069043	1	0.214221	1	0.006572	1	0.0917135	1	-0.000293982	1	-0.104468	1	0.220702	1	1	0.0902995	1	-0.00234043	1	0.0927926	0.0602506	0.0519284	FALSE
Rplp1	0.0163449	1	0.111015	8.74367e-05	0.108239	0.950791	0.0418132	1	0.0655332	1	0.138089	0.0161954	0.0342953	1	0.0850672	9.25433e-05	0.0975605	3.7268e-07	-0.0585034	1	0.0394562	1	0.0344087	1	-0.133812	1	0.0640631	1	0.259916	1	1	-0.0199725	5.09225e-05	0.073027	3.86877e-05	0.127643	0.0602323	-0.137328	FALSE
Fut8	0.0451016	1	-0.0982782	1	-0.00241157	1	0.0586582	1	-0.0253109	1	0.0875569	1	0.197238	0.00162034	0.172902	6.04501e-05	0.110361	1	-0.100574	1	0.170658	1	0.0155683	1	0.0915324	1	0.127573	1	0.052652	1	0.232166	0.0583912	0.0351583	0.0695088	1	0.0527453	0.0602151	0.00758344	FALSE
Hspa13	0.063111	1	0.053054	1	0.020702	1	0.0772259	0.108016	0.0642443	1	-0.00442906	1	0.111295	0.00514174	0.0277824	1	0.0766999	1	0.221189	1	0.0916158	1	0.0878896	1	0.0742899	1	0.0314534	1	-0.0928991	1	0.132365	0.109422	1	0.05363	1	0.0175927	0.0602149	0.0962715	FALSE
Igbp1	-0.0105289	1	0.0614557	1	0.0852184	1	0.0292723	1	0.0840226	1	0.0338663	1	0.093186	1	0.0441511	1	0.0371487	1	0.0978409	1	0.208536	1	0.0139982	1	0.14266	1	0.0337288	1	-0.0513372	1	1	0.0704861	1	0.0863789	1	0.0237789	0.0602146	0.103507	FALSE
Mllt3	0.0764051	1	0.109585	1	0.0624736	1	0.10023	1	0.00909669	1	0.0401108	1	0.096988	1	0.0352089	1	0.065822	1	0.219676	1	0.133819	1	0.154972	1	0.0380196	1	-0.155493	1	-0.0856862	1	1	0.106264	1	0.0264434	1	0.0475385	0.0600818	0.135334	FALSE
Zmym2	0.0591538	1	0.0878424	0.052165	0.0557446	1	0.0380465	1	0.0201959	1	0.0665921	1	0.0733406	1	0.0594965	1	0.0216511	1	0.0141515	1	0.0524749	1	0.0868502	1	0.0624957	1	0.0422006	1	0.158944	1	1	0.0494376	0.823041	0.0524421	1	0.0779564	0.0599454	0.0507887	FALSE
Lonp2	0.0246202	1	-0.0162	1	0.102399	1	0.0815972	0.700389	0.00728805	1	0.0274657	1	0.162166	2.8587e-05	0.0375167	1	0.048334	1	0.0335729	1	-0.0191754	1	0.00204128	1	0.215247	1	0.0968015	1	0.094362	1	0.0170625	0.103441	1	0.0212462	1	0.0549204	0.0598691	0.107323	FALSE
Ankrd50	0.0722772	1	0.0890902	1	0.0470281	1	0.0495988	1	0.0429	1	0.0134737	1	0.0740449	1	0.0813434	1	0.040204	1	0.0279695	1	-0.00115148	1	0.0724054	1	0.0925539	1	0.0971955	1	0.0986362	1	1	0.0632889	1	0.0618755	1	0.0543495	0.059838	0.0346902	FALSE
Ankrd12	-0.0767642	1	0.0684809	1	-0.0507761	1	0.0218694	1	0.0128381	1	-0.0379392	1	0.0543801	1	0.0791297	1	0.103154	1	0.139568	1	0.130323	1	0.13041	1	0.270393	1	-0.0120679	1	0.0643724	1	1	0.0818892	1	0.0557408	1	0.0418443	0.0598247	0.0910093	FALSE
Rbm43	-0.0067599	1	-0.00869124	1	-0.00334265	1	0.0549636	0.11245	0.0368888	1	0.0338707	1	0.0358209	1	0.0111866	1	0.0342056	1	0.0945408	1	0.229704	1	0.0331401	1	0.105801	1	0.0541469	1	0.191242	1	0.92909	0.0568732	1	0.064647	1	0.0578231	0.0597811	0.046806	FALSE
Ago1	0.00704017	1	0.0698955	1	0.033429	1	0.0292106	1	0.0498459	1	0.0597585	1	0.0258328	1	0.0116012	1	0.0252738	1	0.108276	1	0.144331	1	0.0737628	1	0.167947	1	-0.0314968	1	0.121169	1	1	0.0676615	1	0.0488354	1	0.0626787	0.0597252	0.0329989	FALSE
Stk38	0.0240329	1	0.0415333	1	0.0446219	1	0.055046	1	0.0640931	1	0.061651	1	0.106994	0.986682	0.116686	0.00101926	0.0942902	1	-0.0552879	1	0.14865	1	0.0274115	1	-0.000112379	1	0.11419	1	0.0520269	1	1	0.0261346	0.183392	0.0970306	1	0.0560003	0.0597218	0.0582411	FALSE
Snapc1	0.121859	1	0.044522	1	0.0466046	1	0.00157383	1	0.0261554	1	0.101702	1	0.0470651	1	0.0194533	1	0.0878535	1	0.0502872	1	0.0391187	1	0.030845	1	-0.12981	1	0.0615564	1	0.347038	1	1	0.0181951	1	0.0381612	1	0.122809	0.0597216	0.00888166	FALSE
Snrk	0.0606136	1	0.00730278	1	0.0547415	1	0.0452566	1	0.019242	1	-0.00885547	1	0.0543486	1	0.0271139	1	0.0726701	1	0.0777293	1	0.136923	1	0.0739668	1	0.0604618	1	0.0923348	1	0.12187	1	1	0.059682	1	0.0565833	1	0.0628785	0.0597146	0.0335961	FALSE
Alkbh8	0.0771999	1	0.0657562	1	-0.00410999	1	0.0710557	0.169177	0.04926	1	0.0564802	1	0.141308	4.91575e-06	0.0662911	1	0.0782227	1	0.139947	1	0.145703	1	0.137936	1	0.0595762	1	0.0100434	1	-0.198962	1	0.00180542	0.0978172	1	0.0674108	1	0.0139133	0.0597138	0.0795542	FALSE
Tapbp	-0.0165553	1	0.0329534	1	0.181288	1	0.030234	1	0.0183266	1	0.134761	1	-0.0314951	1	0.0104927	1	0.118667	1	0.00202133	1	0.0344385	1	0.22199	1	0.104579	1	-0.0985452	1	0.152068	1	1	0.0177567	1	-0.000466792	1	0.161755	0.0596815	0.120895	FALSE
Acap2	0.0960617	1	0.0538413	1	0.0381491	1	0.0436075	1	0.0256354	1	-0.033832	1	0.0682186	1	0.00554663	1	-0.0270626	1	-0.00800438	1	0.0987853	1	0.0160785	1	0.181151	1	0.0740677	1	0.262575	1	1	0.0762068	1	0.0515753	1	0.0511815	0.0596545	0.0509234	FALSE
Abr	0.0253591	1	-0.00843837	1	0.0644563	1	0.0180145	1	0.0135271	1	0.149182	1	0.0073514	1	0.0358703	1	0.0420502	1	0.0760415	1	0.159942	1	0.11205	1	0.0464991	1	0.0173566	1	0.13479	1	1	0.0346531	1	0.0436515	1	0.100506	0.0596035	0.028073	FALSE
Edf1	0.0561347	1	0.165258	0.000155744	0.0282694	1	0.0986492	0.0342062	0.0810047	1	-0.022617	1	-0.00818702	1	0.147299	6.63434e-05	0.0159398	1	0.13357	1	0.0727396	1	0.0599921	1	0.113843	1	0.0677345	1	-0.11698	1	0.748753	0.0788019	6.18727e-05	0.106807	1	-0.00707915	0.05951	0.318151	FALSE
Rbx1	-0.0119356	1	-0.162047	0.0803186	0.00818572	1	0.0741547	1	0.0536574	1	0.100498	1	-0.0100109	1	0.047538	1	0.0350199	1	0.113467	1	0.352154	1	0.191165	1	0.0192879	1	-0.0857835	1	0.166771	1	1	0.0369926	0.888253	0.0411036	1	0.100328	0.0594747	0.126715	FALSE
Poglut1	0.0400874	1	0.0434958	1	0.0526971	1	0.0442011	1	0.0340618	1	0.00855201	1	0.0249845	1	0.0156183	1	-0.0133881	1	0.077469	1	0.130075	1	0.0627955	1	0.0553117	1	0.111791	1	0.202962	1	1	0.0484107	1	0.0670083	1	0.0627238	0.0593809	0.0762502	FALSE
Rpl41	-0.0415593	1	0.136759	5.69303e-07	0.0962601	1	-0.0108537	1	0.0358374	1	0.205238	4.04066e-06	-0.0740003	1	0.013538	1	0.141574	7.56381e-10	-0.0398033	1	0.0774285	1	0.267558	1	-0.0333492	1	0.0390002	1	0.0769353	1	1	-0.0399131	0.00136366	0.0605126	1.79716e-10	0.157513	0.0593708	-0.521637	FALSE
Mphosph8	0.15493	1	0.116337	0.0986367	0.0369171	1	0.0665632	1	0.0110573	1	-0.00557343	1	0.0363849	1	0.0480255	1	0.0126118	1	0.0898732	1	0.0540866	1	0.0412942	1	0.1529	1	-0.00761539	1	0.0826575	1	1	0.10013	0.914331	0.0443781	1	0.0335814	0.0593633	0.119481	FALSE
Med13	0.0407426	1	0.0706669	0.429751	0.0213463	1	0.0217863	1	0.00381932	1	0.0107302	1	0.00570806	1	0.0158985	1	0.0144674	1	-0.022397	1	0.136673	1	0.137316	1	0.178249	1	0.233125	1	0.0215864	1	1	0.0448179	0.998216	0.0920365	1	0.0410892	0.0593145	0.0357155	FALSE
Rbm5	0.0736453	1	0.0554399	1	0.0276456	1	0.0869659	0.104498	0.0853825	1	0.0694044	1	0.0667516	1	0.0912507	0.0797458	0.13532	1	-0.107859	1	0.00448535	1	0.0249822	1	0.105706	1	0.0378698	1	0.131183	1	0.921016	0.045042	0.887282	0.0548857	1	0.0777069	0.0592115	0.0462581	FALSE
Tbc1d15	0.013695	1	0.0220886	1	0.0318649	1	0.0690028	1	0.0679894	1	0.00122333	1	0.0768039	1	0.0269661	1	0.0339861	1	0.0965854	1	0.0480176	1	0.0538663	1	0.136776	1	0.0506406	1	0.158419	1	1	0.0785725	1	0.0431404	1	0.055872	0.059195	0.0642409	FALSE
Nrp1	0.0927238	1	-0.137024	1	0.0396777	1	0.0883659	0.170636	0.0547776	1	-0.0609016	1	0.218569	2.66874e-09	0.0874076	1	-0.0179105	1	0.298883	1	-0.11625	1	-0.0608775	1	0.291524	1	0.147744	1	-0.0392043	1	4.93273e-06	0.198013	1	0.00733114	1	-0.0278432	0.059167	0.0277713	FALSE
St13	-0.0743218	1	0.0105524	1	0.0103732	1	0.0975337	0.00622021	0.0553155	1	0.120804	1	-0.0278128	1	-0.0293021	1	0.02566	1	0.219821	1	0.133115	1	0.114103	1	0.104715	1	0.115176	1	0.0113436	1	0.426578	0.0639871	1	0.0569712	1	0.0564567	0.0591384	-0.0423188	FALSE
Cdc42se1	0.0485429	1	0.0694607	1	0.0609677	1	0.0434885	1	0.0574896	1	-0.00112351	1	0.0288748	1	0.04233	1	-0.00788411	1	0.172298	1	0.166747	1	0.2026	1	0.199292	1	-0.08299	1	-0.113572	1	1	0.0984992	1	0.0506074	1	0.0281977	0.0591014	0.0169559	FALSE
Kdm2b	0.0100065	1	0.0622413	1	0.0684134	1	0.0233686	1	0.0150211	1	0.0280696	1	0.0838602	0.893874	0.0508344	1	0.0607063	1	0.113422	1	0.135393	1	0.125599	1	-0.033616	1	0.0940744	1	0.048473	1	1	0.0394083	1	0.0715128	1	0.0662522	0.0590578	0.0509976	FALSE
Ddx54	0.136357	1	0.0439424	1	0.0387124	1	0.00275366	1	-0.0286307	1	0.0724843	1	0.0027031	1	0.0489228	1	0.0503928	1	-0.0791653	1	0.0499027	1	0.12762	1	0.0499724	1	0.174924	1	0.193901	1	1	0.0225242	1	0.0578122	1	0.0966221	0.0589862	0.0328598	FALSE
Rpl37	-0.0811711	1	0.107234	1	0.135479	1	-0.0279548	1	0.0818015	1	0.286616	5.70311e-17	-0.128034	2.74978e-08	0.0315171	1	0.172246	1.31043e-17	-0.143201	1	-0.105407	1	0.17973	1	-0.0897743	1	0.195334	1	0.269489	1	0.000134099	-0.0940272	1	0.062096	1.1116e-27	0.208712	0.058927	-0.593675	FALSE
Atpif1	-0.012968	1	-0.0794574	1	0.066683	1	0.0301479	1	0.0817965	1	0.0990156	1	-0.00156538	1	0.0596599	1	0.00896664	1	0.247578	1	0.0345859	1	0.0766514	1	0.0110412	1	0.0921946	1	0.168147	1	1	0.0548467	1	0.0377559	1	0.0838928	0.0588318	-0.175132	FALSE
Blvrb	-0.0278199	1	-0.112874	1	-0.115168	1	0.224357	4.98959e-11	0.137769	1	0.126091	1	0.107324	1	0.170132	0.00550834	-0.00578987	1	0.173572	1	0.0401124	1	-0.0922396	1	0.438766	1	0.0357527	1	-0.218606	1	7.84521e-07	0.18324	0.405877	0.0541783	1	-0.0611426	0.0587585	0.223431	FALSE
Rab3gap1	0.0728349	1	0.0368055	1	0.0473186	1	0.087438	0.00430988	0.0154905	1	-0.00176692	1	0.0667168	1	0.0167569	1	0.0863921	1	0.0122809	1	0.128644	1	-0.00416164	1	0.248729	1	0.0435098	1	0.0242717	1	0.36586	0.0976	1	0.0482413	1	0.0304108	0.0587507	0.0686236	FALSE
Plekha2	-0.0129408	1	0.068364	1	0.0591307	1	0.0800552	0.00858654	0.146591	1	0.0926715	1	0.0886949	1	0.0390915	1	0.0675079	1	-0.0410024	1	0.0700729	1	0.0715461	1	0.122171	1	0.0250087	1	0.00415808	1	0.484011	0.0473955	1	0.0698256	1	0.0590029	0.0587413	0.0805203	FALSE
Mitd1	0.0341861	1	0.0133657	1	0.0960444	1	0.0125533	1	0.0724712	1	0.13913	1	0.0635462	1	0.0486223	1	0.118195	1	0.085108	1	0.112295	1	0.118643	1	0.024948	1	0.0187415	1	-0.0772505	1	1	0.0440683	1	0.0530992	1	0.0789523	0.0587066	0.0945163	FALSE
Set	0.205088	1	0.244565	0.000136377	0.071037	1	0.0168192	1	-0.060676	1	0.00378509	1	-0.105498	1	-0.078442	1	0.0642859	1	0.332356	1	0.06449	1	0.342136	0.622511	-0.0421776	1	-0.00894901	1	-0.168249	1	1	0.0813176	0.0584295	0.0321977	0.999865	0.0625989	0.0587047	0.092371	FALSE
Ikbip	0.0503699	1	-0.00285583	1	0.00867964	1	0.0523217	1	0.0789081	1	0.0578579	1	0.0348824	1	0.0680013	1	0.0521135	1	0.104536	1	0.247938	1	-0.0661276	1	0.128809	1	0.146923	1	-0.0820725	1	1	0.0741838	1	0.107783	1	-0.00590982	0.0586856	0.0762526	FALSE
Atxn1	0.0530712	1	0.0168682	1	0.0340321	1	0.0480249	0.822234	0.0628664	1	0.0340615	1	0.0596559	0.0268358	0.0616709	0.178258	0.0395226	1	0.128014	1	0.010643	1	0.0589268	1	0.0612287	1	-0.0568911	1	0.267951	1	0.665171	0.0699989	0.9688	0.0190315	1	0.0868988	0.0586431	0.0371129	FALSE
Smarcb1	0.115974	1	-0.0117083	1	0.0364919	1	0.0263989	1	-0.0411592	1	0.0175103	1	0.0668007	1	0.0303706	1	0.0441772	1	0.216479	1	0.230915	1	0.163302	1	-0.0597286	1	0.155925	1	-0.112122	1	1	0.0731848	1	0.0728685	1	0.0298721	0.0586418	0.0451543	FALSE
Derl2	0.0319924	1	0.00635536	1	0.0499501	1	0.0728655	1	0.0546752	1	0.0728174	1	0.0508196	1	0.0387595	1	0.0545453	1	0.128887	1	0.145044	1	0.00405984	1	0.191086	1	0.0827039	1	-0.105531	1	1	0.09513	1	0.0655075	1	0.0151683	0.0586019	0.100799	FALSE
Pnpla8	0.0112607	1	0.0356563	1	0.0413593	1	0.07371	1	0.1209	1	0.0734211	1	0.0939161	0.118692	0.0733571	1	0.0415856	1	0.0831975	1	0.0109479	1	0.0549253	1	0.0329932	1	0.0991536	1	0.0325311	1	0.934732	0.0590155	1	0.068003	1	0.0487645	0.0585943	0.0998947	FALSE
Stard3nl	0.0850595	1	0.00118196	1	0.0142947	1	0.0723485	1	0.125397	1	0.0672522	1	0.122086	1	0.0481747	1	-0.0204005	1	0.27378	1	0.0838007	1	-0.0529035	1	0.0660608	1	0.100222	1	-0.107734	1	1	0.123867	1	0.0717552	1	-0.0198981	0.0585747	0.0942684	FALSE
Yif1a	0.0553948	1	-0.0179896	1	0.0322997	1	0.0342383	1	-0.0293427	1	-0.0732771	1	0.100242	0.791479	0.0351035	1	0.00657199	1	0.287507	1	0.104454	1	-0.0186027	1	0.290485	1	0.0158176	1	0.0553971	1	0.999995	0.153573	1	0.0216086	1	0.000477814	0.0585532	0.131592	FALSE
Zfand6	0.0419584	1	-0.00323003	1	0.0140904	1	0.0883395	0.206667	0.0848319	1	0.00182881	1	0.128128	0.0204649	0.0658228	1	0.0164397	1	0.122234	1	0.15091	1	-0.00169065	1	0.131926	1	0.0514481	1	-0.0157672	1	0.362889	0.102517	1	0.0699565	1	0.00298021	0.0584846	0.0984208	FALSE
Stx7	0.0547627	1	0.00621787	1	0.0472554	1	0.0243888	1	0.0629243	1	0.00241735	1	0.08631	1	0.0616963	1	0.0239629	1	0.0185013	1	0.164446	1	0.119549	1	0.0545303	1	-0.0183589	1	0.168374	1	1	0.0476986	1	0.0553851	1	0.0723119	0.0584652	0.0349749	FALSE
Casd1	0.110907	1	0.10007	0.280294	0.0925495	1	0.0456486	1	0.0413437	1	-0.00406606	1	0.0423354	1	0.0508364	1	0.0133694	1	0.141419	1	0.221966	1	0.00947009	1	-0.0769212	1	0.0349692	1	0.0527143	1	1	0.0526776	0.990221	0.0898371	1	0.0328074	0.0584407	0.0551754	FALSE
Mark2	0.073164	1	0.0629869	1	0.0729016	1	0.0310668	1	0.0212583	1	-0.014719	1	0.0586735	1	0.0307813	1	0.0213333	1	0.0357221	1	0.16484	1	0.0178353	1	0.215997	1	0.0894776	1	-0.00471658	1	1	0.0829246	1	0.0738689	1	0.0185269	0.0584401	0.0703728	FALSE
Crabp2	0.0916421	1	0.376175	4.13506e-12	0.0425328	1	0.0667301	1	0.301597	1	-0.192507	1	-0.0134822	1	0.0605483	1	-0.0725964	1	-0.191466	1	0.380752	1	-0.0693935	1	0.110202	1	0.102373	1	-0.118091	1	1	0.0127251	9.52719e-08	0.244289	1	-0.0820111	0.0583344	0.245021	FALSE
Wnk1	0.0769699	1	0.105085	1	0.0863576	1	0.0370269	1	0.0562264	1	0.0193437	1	0.0813524	1	-0.00542203	1	0.122061	1	0.065439	1	0.14652	1	-0.0483728	1	0.180992	1	0.00242907	1	-0.0519466	1	1	0.088356	1	0.0609678	1	0.0254886	0.0582708	0.110209	FALSE
Gm28809	0.0856289	0.0696092	0.0395702	1	0.0530534	1	0.0434922	1	0.0578286	1	0.0114202	1	0.114941	1.47028e-07	0.0462794	1	0.0893949	1	0.0602154	1	0.0600663	1	0.0794304	1	0.0564299	1	0.0975492	1	-0.0223314	1	6.14051e-05	0.0721414	1	0.0602588	1	0.0421935	0.0581979	0.0664973	FALSE
Appl1	0.0759955	1	0.0162186	1	0.100927	1	0.016273	1	-0.0653172	1	-0.0755561	1	0.130849	0.00230724	0.00817629	1	0.0859756	1	0.227671	1	0.0872531	1	0.14089	1	0.146396	1	0.0883618	1	-0.11194	1	0.275573	0.119437	1	0.0269385	1	0.0280593	0.0581449	0.0611095	FALSE
Gls	0.0385596	1	0.0749282	1	0.0434525	1	0.000204459	1	0.0145921	1	0.0943281	1	0.0166831	1	0.0221984	1	0.0134787	1	0.0105741	1	0.209431	1	-0.0260037	1	0.0633229	1	0.0656124	1	0.229659	1	1	0.0258688	1	0.0773525	1	0.0709829	0.0580681	0.046117	FALSE
Trio	0.0305187	1	0.071397	1	0.0177107	1	-0.00307078	1	0.0274494	1	0.0281207	1	0.0474678	1	0.0492771	1	0.0423279	1	0.220555	1	0.135389	1	0.0475863	1	0.0624218	1	0.107255	1	-0.0134289	1	1	0.0715785	1	0.0781535	1	0.0244633	0.0580651	0.0471074	FALSE
Akap8l	-0.00844958	1	0.0537856	1	0.00755756	1	0.0445931	1	0.0226609	1	0.0478239	1	0.0421161	1	0.0248593	1	0.0455503	1	0.0577426	1	-0.196209	1	0.132427	1	0.220276	1	0.158239	1	0.21795	1	1	0.0712555	1	0.0126673	1	0.0902618	0.0580615	0.0535525	FALSE
Arhgef12	-0.0382237	1	-0.0201742	1	-0.0394979	1	0.100721	0.00611468	0.131125	1	0.0824029	1	0.120396	0.29397	0.113191	6.71362e-05	0.0928372	1	0.0552427	1	0.194393	1	-0.0364719	1	-0.0312671	1	-0.0110832	1	0.156419	1	0.244342	0.0413739	0.0375846	0.0814903	1	0.0511379	0.0580007	0.0634739	FALSE
Stag1	0.0510183	1	0.0414866	1	0.0841208	1	0.0549732	1	0.0149109	1	0.0130188	1	0.100106	0.821608	0.0331769	1	0.0319286	1	0.154142	1	0.0114146	1	0.126273	1	0.26262	1	-0.0586279	1	-0.0508735	1	0.999998	0.124572	1	0.0084722	1	0.0408936	0.0579792	0.0159281	FALSE
Eif4b	0.0817911	1	0.191886	1.42454e-05	0.107253	1	0.103849	0.0166036	0.0907213	1	0.0622372	1	0.0374224	1	0.0672021	1	-0.0776072	1	0.0496021	1	0.101404	1	0.116191	1	-0.000998179	1	0.066323	1	-0.128288	1	0.609672	0.0543332	0.0135634	0.103507	1	0.0159571	0.0579325	0.070394	FALSE
Epn2	0.015426	1	-0.0794626	1	-0.0121279	1	0.123499	0.000356458	0.141324	1	0.0579974	1	0.130681	0.158356	0.0852989	1	0.0414572	1	0.135038	1	0.0911731	1	-0.125917	1	0.122275	1	0.211736	1	-0.070188	1	0.0336525	0.105384	1	0.0900138	1	-0.0217557	0.0578805	0.110726	FALSE
Mapkap1	0.1008	1	0.114503	0.159601	0.0519951	1	0.0705566	1	-0.0142288	1	0.0500338	1	0.0519402	1	0.0470874	1	0.119953	1	0.0885415	1	0.121267	1	-0.0433414	1	0.0674731	1	0.0295066	1	0.0114101	1	1	0.0758622	0.961003	0.059627	1	0.03801	0.0578331	0.0225811	FALSE
Galnt7	-0.11403	1	-0.0537717	1	-0.01805	1	0.00461042	1	0.0812337	1	0.0932744	1	0.0680301	1	0.0536972	1	0.0140079	1	0.150787	1	0.0954436	1	0.0743861	1	0.0963935	1	0.0810685	1	0.240312	1	1	0.0411581	1	0.0515343	1	0.080786	0.0578261	0.0608706	FALSE
Actr2	0.104913	1	0.0909102	1	0.0826519	1	-0.028155	1	0.0160356	1	-0.0152798	1	0.01711	1	0.0729968	1	0.040681	1	0.110874	1	0.228894	1	0.0574453	1	-0.113599	1	0.0488549	1	0.152372	1	1	0.0182287	1	0.0915384	1	0.0635741	0.0577804	-0.0174047	FALSE
Mcm6	0.181321	1	0.016534	1	0.216101	1	0.0514128	1	-0.0126043	1	0.102933	1	-0.0282956	1	-0.0551513	1	0.020159	1	0.0878719	1	0.351519	1	0.187747	1	-0.174364	1	-0.18666	1	0.10752	1	1	0.0235894	1	0.0227276	1	0.126892	0.0577364	0.0707024	FALSE
Mlph	0.107755	1	-0.0250059	1	0.0522501	1	0.0332993	1	0.0776197	1	-0.0445148	1	0.0891015	0.0064637	0.0977705	1.0782e-07	0.0238627	1	0.18125	1	0.197884	1	0.0571549	1	0.0306256	1	0.0657089	1	-0.0788139	1	0.433233	0.0884063	0.000387492	0.0827954	1	0.0019878	0.0577298	0.0637338	FALSE
Rab11fip2	0.115693	1	-0.0672468	1	0.0399447	1	0.0229358	1	-0.0064741	1	0.0445039	1	0.127937	0.00478126	0.0237499	1	0.071443	1	0.226854	1	0.154111	1	-0.0569959	1	0.000490855	1	0.0734665	1	0.0950476	1	0.382491	0.098782	1	0.0355213	1	0.0387887	0.0576973	0.0813734	FALSE
Zfand2b	0.076816	1	-0.0648693	1	-0.0357963	1	-0.000688438	1	-0.0161404	1	-0.0034695	1	0.072009	1	0.0503555	1	0.0767753	1	0.164348	1	0.130131	1	0.0307149	1	0.11644	1	0.104876	1	0.163314	1	1	0.0857848	1	0.0408707	1	0.0463076	0.0576544	0.0714853	FALSE
Nudt4	0.0578125	1	0.00115548	1	-0.106584	1	0.122966	0.00575831	0.0980929	1	-0.0512989	1	0.191223	0.159847	0.0866101	1	-0.0586038	1	0.12678	1	0.412411	1	0.0219842	1	0.425079	1	0.11824	1	-0.581415	0.632589	0.173846	0.184772	1	0.143302	0.999885	-0.155184	0.0576301	0.197214	FALSE
Gigyf2	0.12714	1	0.0192263	1	0.105384	1	0.0465144	1	0.0117773	1	0.0251613	1	0.0786935	1	0.020764	1	0.00900823	1	0.0298117	1	0.0211326	1	0.0864386	1	0.151098	1	0.0504815	1	0.0817852	1	1	0.0866515	1	0.0246763	1	0.0615554	0.0576277	0.0769401	FALSE
Ing1	0.0764542	1	0.0405806	1	0.0529668	1	0.0514178	1	0.0304429	1	-0.00985209	1	0.0611056	1	-0.00449761	1	0.0444099	1	0.190403	1	-0.0316447	1	-0.00793015	1	0.07159	1	0.0513765	1	0.247187	1	1	0.0901941	1	0.0172515	1	0.0653563	0.0576006	0.055811	FALSE
Sec31a	0.132899	1	0.0173807	1	0.104748	1	0.0524547	1	0.0738589	1	-0.000732512	1	0.124718	0.475036	0.0598236	1	0.0516442	1	0.146176	1	0.188019	1	-0.0511111	1	0.00680881	1	-0.00730787	1	-0.0356656	1	0.99897	0.0926113	1	0.0663549	1	0.0137767	0.057581	0.105539	FALSE
Srgap2	0.101609	1	0.0355789	1	0.0862105	1	0.0732764	0.0841674	-0.00276327	1	0.0390244	1	0.0881662	1	0.0491793	1	0.0624419	1	0.256994	1	-0.0378395	1	-0.0430798	1	0.0287716	1	-0.00617752	1	0.131215	1	0.8945	0.109763	1	0.00759559	1	0.0551624	0.0575071	0.0737124	FALSE
Rbfox2	0.0841112	1	0.0622844	1	0.0256861	1	0.0678879	1	0.0682032	1	0.0823543	1	0.0687389	1	0.090303	1	0.0362606	1	0.0936995	1	-0.0245459	1	-0.0400198	1	0.211708	1	-0.0322595	1	0.0669283	1	1	0.105229	1	0.032797	1	0.0342419	0.0574227	0.0864355	FALSE
Pnkd	0.171091	1	-0.0069918	1	0.0833778	1	0.056062	1	0.116841	1	-0.0436391	1	0.125642	0.219747	0.0435378	1	0.0692088	1	0.144855	1	0.041886	1	0.0400685	1	-0.0574061	1	0.057147	1	0.018871	1	0.980696	0.0880487	1	0.0504839	1	0.0335774	0.05737	0.0780661	FALSE
Gbp7	-0.0244201	1	-0.0547291	1	0.157596	1	0.0489376	1	0.00733073	1	0.266736	1	0.0284375	1	0.00229536	1	0.243229	0.0274468	-0.113902	1	0.118666	1	0.212492	1	-0.029596	1	-0.0590947	1	0.0563302	1	1	-0.0181087	1	0.00289369	0.707297	0.187277	0.0573539	0.1347	FALSE
Zfp395	0.0457618	1	0.00410479	1	0.0209362	1	0.0524423	1	0.0475448	1	0.103191	1	0.078796	1	0.0219591	1	0.0696115	1	0.0549803	1	0.0960271	1	0.105832	1	0.0529577	1	-0.0255346	1	0.130871	1	1	0.0569876	1	0.0288202	1	0.0860885	0.0572988	0.0866736	FALSE
Zfp148	0.0546619	1	0.0453005	1	0.0484393	1	0.049126	1	0.128266	1	0.0290831	1	0.0585166	1	0.0405421	1	0.0106445	1	0.0910229	1	0.112744	1	-0.0163479	1	0.169088	1	0.0457757	1	-0.00838452	1	1	0.084483	1	0.0745256	1	0.0126869	0.0572319	0.0610465	FALSE
Ap1m1	0.0795498	1	0.0173625	1	0.00495405	1	0.0298267	1	-0.00443407	1	-0.0181138	1	0.0244955	1	0.0252562	1	0.0103357	1	0.32514	1	0.110144	1	0.119771	1	0.109914	1	0.0753548	1	-0.0516529	1	1	0.113785	1	0.0447367	1	0.0130588	0.0571935	0.0497429	FALSE
Dynlt3	-0.124001	1	0.094812	1	0.00226397	1	0.132595	0.000763817	0.127143	1	0.0474314	1	0.174914	4.58912e-05	0.127449	0.0221512	-0.0574865	1	0.0564109	1	0.180137	1	-0.0895319	1	0.267308	1	-0.0176138	1	-0.0639515	1	0.000162186	0.101445	0.665926	0.102385	1	-0.0322549	0.0571919	0.211348	FALSE
Chm	0.0185307	1	0.0466802	1	0.0431413	1	0.0499486	1	0.0575022	1	0.0364388	1	0.0561067	1	0.0249361	1	0.00540417	1	0.113777	1	0.112386	1	0.0254858	1	0.109309	1	0.0493707	1	0.108403	1	1	0.0695344	1	0.058175	1	0.0437747	0.0571613	0.0611309	FALSE
Lrch3	0.086933	1	0.0386951	1	0.0208755	1	0.0267036	1	0.0316274	1	0.0252604	1	0.0642084	1	0.0114268	1	-0.00700181	1	0.0525379	1	0.0802882	1	0.0055559	1	0.0679178	1	0.0640541	1	0.287169	1	1	0.0596602	1	0.0452183	1	0.0663718	0.0570834	0.0560752	FALSE
Bcl9l	0.0234885	1	0.00292616	1	-0.0403783	1	0.0731605	0.147008	0.0782014	1	0.0344215	1	0.111099	0.42767	0.069779	1	0.0169781	1	0.051315	1	-0.0298901	1	0.0918999	1	0.169722	1	0.14562	1	0.057443	1	0.852829	0.085757	1	0.0533273	1	0.0320728	0.0570524	0.0484968	FALSE
Hnrnpu	0.243733	1	0.0865301	1	0.135771	1	0.101118	0.637652	-0.0400763	1	-0.10509	1	0.147654	0.532013	-0.0464668	1	0.0684007	1	0.210091	1	0.178934	1	0.0734859	1	-0.0658527	1	0.125313	1	-0.257763	1	0.99494	0.127349	1	0.0608466	1	-0.0170392	0.057052	0.14987	FALSE
2005-03-01	0.00148943	1	0.023463	1	-0.0239858	1	0.0274686	1	0.0114211	1	0.0732798	1	0.0285844	1	0.0525976	1	0.0387884	1	0.174326	1	0.128755	1	-0.0753929	1	0.160549	1	0.122244	1	0.111583	1	1	0.0784835	1	0.0676962	1	0.0248545	0.0570114	0.056302	FALSE
Rps6ka3	0.0490202	1	0.068228	1	0.0394745	1	-0.0112132	1	0.0182835	1	-0.0597071	0.954158	0.0606739	1	0.0135973	1	-0.0307711	1	0.223512	1	0.213296	1	0.1254	1	0.0583686	1	0.00824235	1	0.0787421	1	1	0.0760723	1	0.0643294	1	0.0306277	0.0570098	0.00773622	FALSE
Mrpl24	0.096342	1	-0.00944289	1	0.10182	1	0.10764	0.00576663	0.0734998	1	0.0886005	1	0.0439045	1	0.0724975	1	0.0851245	1	0.0438983	1	0.0621133	1	0.047118	1	0.0635959	1	0.112315	1	-0.134061	1	0.413616	0.0710762	1	0.0621965	1	0.0377205	0.0569977	0.16251	FALSE
Zscan26	0.0432022	1	0.0376138	1	0.0203046	1	0.0417758	1	0.0555169	1	0.0333153	1	0.0851942	0.362541	0.0658025	0.0877737	0.0140346	1	0.0184811	1	0.133045	1	0.0139559	1	0.0386566	1	0.0491814	1	0.201867	1	0.996111	0.045462	0.899948	0.0682318	1	0.0566954	0.0567964	0.0655813	FALSE
Skap2	0.0239002	1	-0.0923253	1	-0.0398838	1	0.1191	0.000976822	0.111975	1	0.0052026	1	0.175842	1.55558e-06	0.0841232	1	-0.00560531	1	0.121133	1	0.0298164	1	-0.109906	1	0.284673	1	0.0483971	1	0.0946389	1	1.32279e-05	0.14493	1	0.0363972	1	-0.0111106	0.0567387	0.134819	FALSE
Sh3pxd2b	0.0437293	1	0.053423	1	0.0325179	1	0.0380921	1	0.0175595	1	-0.00910731	1	0.105519	0.00368653	0.079751	1	0.0688426	1	0.117889	1	0.0357124	1	0.0524803	1	0.0830811	1	-0.0205707	1	0.152144	1	0.341685	0.0776621	1	0.033175	1	0.0593754	0.0567375	0.0205144	FALSE
Abi1	0.0438988	1	0.0877768	1	-0.0342343	1	0.0715599	1	0.110654	1	0.00775801	1	0.0272132	1	0.053224	1	0.069923	1	0.106941	1	0.158853	1	0.092111	1	0.0654008	1	0.115977	1	-0.126019	1	1	0.0630027	1	0.105297	1	0.00190773	0.0567357	0.0387813	FALSE
mt-Nd4	-0.0846536	1	0.25146	4.05423e-05	0.0498215	1	0.0688185	0.869271	0.0840743	1	0.118451	1	0.0335161	1	0.145182	0.0482698	0.191102	1	-0.0898116	1	-0.103173	1	-0.0272696	1	0.168716	1	0.186364	1	-0.1416	1	1	0.0193171	0.00337128	0.112781	1	0.0381011	0.0567332	0.151197	FALSE
Snrnp70	0.0776663	1	0.0444832	1	0.0607441	1	-0.0104811	1	-0.00690944	1	0.0624268	1	0.0477753	1	0.0230257	1	0.0772433	1	0.154282	1	-0.0698	1	0.226982	1	0.133786	1	-0.036377	1	0.0657698	1	1	0.0806057	1	-0.0091155	1	0.0986333	0.0567078	0.0537843	FALSE
Gak	0.0653409	1	0.0832298	1	0.106673	1	0.0895804	8.30439e-05	0.0303408	1	0.0405295	1	0.0856	0.100712	0.0475513	1	0.0677505	1	0.00253986	1	0.0469715	1	-0.060809	1	0.137295	1	0.0169966	1	0.090842	1	0.00941698	0.0760713	1	0.045018	1	0.0489973	0.0566955	0.0346178	FALSE
Zfp260	0.0765357	1	0.0440171	1	0.027802	1	0.0494055	1	0.0344319	1	0.0460685	1	0.0538557	1	0.0432388	1	0.0416115	1	0.0466956	1	0.111551	1	0.0785242	1	0.103183	1	0.116077	1	-0.0228517	1	1	0.0659351	1	0.0698632	1	0.0342309	0.0566764	0.0396638	FALSE
Fam69a	0.0735946	1	0.121467	2.12186e-05	0.0737494	1	0.0394546	1	-0.0119725	1	0.0432591	1	0.0276446	1	0.0599415	1	0.083079	1	0.00650523	1	0.0572117	1	0.00221171	1	0.0246223	1	0.0176734	1	0.231279	1	1	0.0343643	0.0177381	0.0488642	1	0.0867157	0.0566481	0.0446338	FALSE
Rbm28	0.135506	1	0.0466808	1	0.058145	1	0.0197259	1	0.00121081	1	0.0483388	1	0.0837033	1	-0.025368	1	0.111804	1	-0.076149	1	0.131742	1	0.168532	1	0.0251402	1	-0.0725347	1	0.192919	1	1	0.0375852	1	0.0163461	1	0.115948	0.0566263	-0.0352829	FALSE
Twist1	0.162576	1	-0.00488423	1	0.0701408	1	0.154127	1	0.0469027	1	-0.0632391	1	0.358537	3.19176e-07	0.160161	0.0286733	-0.00321736	1	0.00950252	1	0.221384	1	0.0850403	1	0.0672443	1	-0.130118	1	-0.286384	1	0.000884482	0.150397	0.715632	0.058689	1	-0.0395318	0.0565182	0.224722	FALSE
Gpx8	-0.000750105	1	0.107096	1	-0.0265502	1	-0.00266447	1	0.0513126	1	0.0389739	1	0.00725039	1	0.0982141	1	-0.0609418	1	-0.153533	1	0.306535	1	0.0547413	1	0.05026	1	0.13577	1	0.241501	1	1	-0.0198874	1	0.139786	1	0.0495448	0.056481	0.0805507	FALSE
Pla2g4a	0.00525679	1	0.0280675	1	0.044413	1	0.0568627	0.238081	0.0390881	1	0.0721678	1	-0.00069217	1	0.0143255	1	0.0344002	1	0.20165	1	0.17642	1	0.127292	1	-0.0331629	1	0.134929	1	-0.0544261	1	0.984314	0.0459829	1	0.0785659	1	0.0447694	0.0564394	0.0855882	FALSE
Tmod3	0.170975	1	0.11404	1	0.0799705	1	0.0744895	1	0.0139421	1	0.0025421	1	0.110225	1	0.0434197	1	-0.0788005	1	0.00995818	1	0.153229	1	-0.0604016	1	0.282545	1	0.0245159	1	-0.0946147	1	1	0.129639	1	0.0698294	1	-0.0302609	0.0564024	0.0891837	FALSE
Ttc37	0.0476115	1	0.0162124	1	0.0212298	1	0.0390393	1	-0.0179558	1	0.0197614	1	0.077426	1	0.0411821	1	0.0161795	1	0.0561241	1	0.0338613	1	0.113984	1	0.039552	1	0.199238	1	0.14211	1	1	0.0519506	1	0.0545075	1	0.0626529	0.0563703	-0.0049385	FALSE
Crybg1	0.0458693	1	-0.041015	1	0.00617546	1	0.0302729	1	-0.0396466	1	0.0225008	1	0.0497866	1	-0.0219039	1	0.0815041	1	0.123965	1	0.204696	1	0.00445667	1	0.250611	1	0.0570116	1	0.0710323	1	1	0.100101	1	0.0318285	1	0.0371339	0.0563544	0.0758654	FALSE
Mybbp1a	0.0599556	1	0.0396882	1	0.0909964	1	0.041969	1	-0.0209244	1	0.133946	1	-0.0598127	1	-0.0989097	1	0.0822164	1	0.0967084	1	0.069446	1	0.203773	1	0.00216429	1	-0.0144358	1	0.218175	1	1	0.0281969	1	-0.00502715	1	0.145821	0.0563303	0.0385415	FALSE
Pcm1	0.0642327	1	0.0144048	1	0.0959305	1	0.135001	0.000625616	-0.00874876	1	0.0764526	1	0.183488	9.24665e-06	-0.0367395	1	0.0793043	1	-0.119133	1	-0.0291839	1	0.0752383	1	0.193055	1	-0.0985094	1	0.219617	1	3.89369e-05	0.0913288	1	-0.0317554	1	0.109309	0.056294	-0.00168953	FALSE
Haus3	0.0618017	1	0.0211506	1	0.0340764	1	0.0570154	1	0.00321104	1	-0.000655185	1	-0.00442093	1	0.000827966	1	0.0617951	1	0.021403	1	0.0159781	1	0.141935	1	0.119582	1	0.233725	1	0.0752437	1	1	0.0510763	1	0.0549785	1	0.062479	0.0561779	0.0393928	FALSE
Fam171a1	0.10204	1	0.045392	1	0.0440976	1	0.0303789	1	0.0404092	1	-0.0189026	1	0.0243633	1	0.0334031	1	0.0607236	1	0.0675966	1	0.151175	1	0.114325	1	0.142572	1	0.046372	1	-0.0420652	1	1	0.0733901	1	0.0633502	1	0.0316357	0.0561253	0.0567062	FALSE
Idh1	0.115988	1	0.0450715	1	0.0194555	1	0.0549113	0.270532	0.0233938	1	-0.0109907	1	0.0645127	1	0.0323553	1	-0.0077896	1	0.152902	1	0.135042	1	0.0869738	1	-0.0576816	1	0.14584	1	0.0417803	1	0.989096	0.0661264	1	0.0763407	1	0.0258859	0.0561176	0.0535663	FALSE
Gtf2ird1	0.116561	1	0.0868014	1	0.0824222	1	0.0213255	1	0.0848349	1	0.0430465	1	0.0180201	1	0.0934598	0.00312025	0.0315529	1	0.068174	1	0.0163427	1	-0.00352917	1	0.102136	1	0.00801877	1	0.0723109	1	1	0.0652433	0.317044	0.0578915	1	0.0451607	0.0560985	0.061524	FALSE
2810474O19Rik	0.0678785	1	0.202129	0.000576478	0.151406	1	0.0238481	1	0.142881	1	0.00211291	1	0.0523842	1	0.0446806	1	0.0547638	1	-0.0015111	1	-0.17252	1	-0.0284387	1	0.157075	1	0.00157657	1	0.141714	1	1	0.0599349	0.135112	0.0437497	1	0.0643115	0.0559987	0.0809705	FALSE
Fbxo32	-0.0125523	1	0.0228894	1	-0.0107576	1	-0.0504772	1	0.183993	1	0.387898	1	-0.0466896	1	0.104711	1	0.163715	1	-0.0394403	1	0.0308547	1	-0.0284931	1	-0.0758696	1	-0.0154948	1	0.225593	1	1	-0.0450058	1	0.0653906	1	0.147591	0.055992	-0.0588826	FALSE
Nsd3	0.0363685	1	0.0118327	1	0.0677021	1	0.084525	0.657608	0.00494644	1	0.0795628	1	0.111207	0.930112	0.0607031	1	0.0265744	1	-0.042694	1	0.0108787	1	0.0511232	1	0.0596925	1	0.0402669	1	0.236623	1	0.999841	0.0498197	1	0.0257256	1	0.0923171	0.0559541	0.0616327	FALSE
Fbxo31	-0.0587669	1	-0.11144	1	-0.09177	1	0.022238	1	0.0788061	1	0.0222312	1	0.0891188	0.933748	0.0494929	1	0.0400009	1	0.256061	1	0.0703438	1	0.101885	1	0.104445	1	-0.0116197	1	0.278114	1	1	0.0826192	1	0.0151165	1	0.0700922	0.0559427	0.0471603	FALSE
Sfr1	0.149484	1	0.0824195	1	0.111098	1	0.0513764	1	-0.028343	1	0.0309041	1	0.0680912	1	0.0180298	1	0.0732322	1	0.276723	1	0.207046	1	-0.0676919	1	0.0930774	1	-0.0712203	1	-0.15521	1	1	0.12775	1	0.0415863	1	-0.00153356	0.0559344	0.118246	FALSE
Lamtor2	-0.00623638	1	-0.026125	1	0.0907655	1	0.0784178	0.98286	0.113989	1	0.051805	1	0.0679336	1	0.0481576	1	0.0405615	1	0.189948	1	0.0362119	1	0.123101	1	0.0879059	1	-0.0161261	1	-0.042424	1	1	0.0835938	1	0.0312214	1	0.0527618	0.055859	0.0593408	FALSE
Gm47243	0.0785023	1	-0.0245451	1	0.0567108	1	0.0771218	0.861708	-0.0178885	1	0.0590645	1	0.13955	0.0012933	0.0818117	1	0.0987339	1	0.174817	1	0.148159	1	-0.0576289	1	0.223963	1	-0.0231631	1	-0.17774	1	0.192091	0.138791	1	0.0328748	1	-0.00417198	0.0558312	0.0851543	FALSE
Vps36	-0.0560764	1	-0.00113625	1	0.01657	1	-0.0130861	1	-0.0173341	1	-0.0153691	1	0.0697837	1	-0.00446259	1	0.0741361	1	0.168201	1	0.0326201	1	0.141354	1	0.0294737	1	0.162287	1	0.250431	1	1	0.0396591	1	0.0343949	1	0.0934246	0.0558262	0.0910554	FALSE
Rnf214	0.0897135	1	0.0772794	1	0.0729997	1	0.0730111	0.227719	0.0392936	1	0.086999	1	0.0088645	1	0.028816	1	0.0492175	1	0.0368356	1	0.0215423	1	-0.0495883	1	0.190033	1	0.0639485	1	0.0477894	1	0.982366	0.0796916	1	0.046176	1	0.0414834	0.0557837	0.0292231	FALSE
Casp1	0.0482948	1	-0.283249	5.99673e-09	0.0917828	1	0.123739	0.00358348	-0.0176249	1	0.072032	1	0.200903	5.07122e-10	-0.0808088	1	-0.00874841	1	-0.0329226	1	0.292263	1	-0.0573443	1	0.247661	1	0.0996902	1	0.140805	1	4.71405e-08	0.117535	4.00754e-05	0.00205407	1	0.0477054	0.0557648	0.166674	FALSE
Usp50	0.0569327	1	-0.0503949	1	0.0636945	1	0.0419211	1	0.0395647	1	0.0689793	1	0.0504035	1	0.0226123	1	0.0845559	1	0.22153	1	0.0147315	1	0.108516	1	0.0339955	1	-0.000624366	1	0.0793776	1	1	0.0809565	1	0.00517786	1	0.0810246	0.0557197	-0.0298351	FALSE
Cops9	0.0220551	1	-0.0891851	1	0.156045	1	0.0591598	1	0.0438724	1	0.089964	1	0.0832664	1	0.094468	1	0.0269097	1	0.0394333	1	0.209442	1	0.103485	1	0.0748943	1	0.0311015	1	-0.109773	1	1	0.0557618	1	0.0579398	1	0.0533261	0.0556759	-0.17856	FALSE
Rnpepl1	0.109287	1	0.0534836	1	0.0365119	1	0.0227013	1	-0.0413699	1	-0.0362095	1	0.0846189	0.186115	0.0684999	1	0.0340037	1	0.163015	1	0.129825	1	0.0176239	1	0.0241658	1	0.0726832	1	0.0961856	1	0.971553	0.0807575	1	0.0566244	1	0.0296231	0.0556683	0.0717211	FALSE
Aig1	0.0609023	1	0.00268751	1	-0.0147547	1	0.114115	0.502204	0.0675115	1	0.0776274	1	0.085966	1	0.139564	0.0225371	0.0953006	1	-0.0291045	1	0.0202565	1	0.0168112	1	0.19312	1	0.0441219	1	-0.0392455	1	0.999269	0.0849997	0.669283	0.0548282	1	0.0271478	0.0556586	0.0579356	FALSE
Foxn3	0.0818897	1	0.0836334	1	0.0228406	1	0.047447	1	0.0502656	1	0.119661	1	0.0248249	1	0.0358704	1	0.0617938	1	-0.0350908	1	0.119958	1	0.142328	1	0.0388882	1	0.0278098	1	0.0126246	1	1	0.0315918	1	0.0635074	1	0.0718498	0.0556497	0.0666759	FALSE
Npepps	-0.00353081	1	0.0663208	1	0.0714791	1	0.0108108	1	0.0146566	1	0.0427393	1	0.057121	1	0.00819803	1	0.0118583	1	0.00372249	1	0.130674	1	-0.104596	1	0.168942	1	0.0551449	1	0.300752	1	1	0.0474132	1	0.0549988	1	0.0644466	0.0556195	0.0376261	FALSE
Stxbp1	0.0309474	1	0.0231592	1	0.0235456	1	0.0601654	0.00137068	0.000609101	1	0.0242298	1	0.0258487	1	0.0307977	1	0.0260049	1	0.16855	1	0.0511599	1	0.0671292	1	0.0400077	1	0.143996	1	0.117852	1	0.213517	0.0651037	1	0.0499445	1	0.0517524	0.0556002	0.0620421	FALSE
Nr2c2	0.0790252	1	0.0533454	1	0.0312179	1	0.040853	1	0.0317244	1	0.0595119	1	0.0369095	1	0.00627702	1	0.0768576	1	0.113506	1	0.0389192	1	0.0690167	1	-0.0235381	1	0.0834364	1	0.136177	1	1	0.0493512	1	0.0427405	1	0.0745561	0.0555492	0.0756236	FALSE
Ptbp3	0.110044	1	0.0960368	1	0.13612	1	0.00486568	1	0.0105568	1	0.0707789	1	0.0577269	1	0.070996	1	0.0988109	1	0.118733	1	-0.0873718	1	0.101946	1	-0.0099132	1	-0.0253262	1	0.079118	1	1	0.0562913	1	0.0129783	1	0.0973547	0.0555415	0.00723488	FALSE
Sertad3	0.0258134	1	0.0255561	1	0.0647878	1	0.0462157	1	0.0278814	1	0.00719942	1	0.0415284	1	0.0197899	1	0.0190728	1	0.0484568	1	0.187609	1	0.197151	1	0.0827044	1	0.112371	1	-0.0739927	1	1	0.0489437	1	0.0746413	1	0.0428437	0.0554762	0.0664487	FALSE
Mecp2	0.0220714	1	0.0265966	1	0.0586991	1	0.00346843	1	0.0451096	1	0.0500252	1	0.031354	1	0.0143292	1	0.0367656	1	0.133229	1	0.0653585	1	0.035151	1	0.0994668	1	0.0448947	1	0.164988	1	1	0.0579179	1	0.0392577	1	0.0691257	0.0554338	0.00807745	FALSE
Sfswap	0.0585712	1	0.0703747	1	0.0909856	1	0.0236021	1	0.0371521	1	0.0119797	1	0.0725653	1	0.0467255	1	0.0339189	1	0.0381631	1	0.0420914	1	-0.00438126	1	0.186528	1	0.0430185	1	0.079814	1	1	0.075886	1	0.0478724	1	0.0424634	0.0554073	0.0269961	FALSE
Pura	0.0496007	1	-0.0417539	1	-0.00590913	1	0.115183	0.000741599	0.100263	1	0.0626842	1	0.13973	0.0757731	0.0912084	1	0.0398559	1	0.0850732	1	0.0427662	1	0.000210654	1	0.167507	1	-0.123224	1	0.107448	1	0.0335555	0.111419	1	0.0138521	1	0.0408579	0.0553762	0.229398	FALSE
Ikbkg	-0.0357113	1	-0.0442813	1	0.00680258	1	0.0858622	0.000103723	0.0634807	1	0.0772027	1	0.112818	9.25698e-08	0.105657	0.000142077	0.0952877	1	0.0714367	1	0.0929978	1	0.0407746	1	0.142598	1	0.00825139	1	0.00720123	1	1.95182e-07	0.0754007	0.0599059	0.0452211	1	0.0454538	0.0553585	0.0811906	FALSE
Ccdc9	0.0359078	1	0.0467933	1	0.0328908	1	0.0125993	1	0.0207306	1	-0.00608073	1	0.0152791	1	0.030345	1	0.0319166	1	0.00293644	1	0.14892	1	0.106359	1	0.165096	1	0.0230008	1	0.162278	1	1	0.0463637	1	0.0539579	1	0.0654728	0.0552648	0.0355096	FALSE
Numa1	0.100716	1	0.0497754	1	0.0502977	1	0.0861892	0.0235071	0.0164367	1	-0.0106739	1	0.044205	1	0.0175489	1	0.0426594	1	0.19024	1	0.195309	1	0.0116959	1	0.0549302	1	-0.116985	1	0.0964545	1	0.67746	0.0952561	1	0.0324169	1	0.0380867	0.0552533	0.0990645	FALSE
Usp15	0.0516481	1	-0.00163927	1	0.0439379	1	0.0615493	1	0.0227485	1	0.0683915	1	0.0397272	1	0.00196255	1	0.0806464	1	0.0643964	1	0.160238	1	0.0465441	1	0.0661889	1	0.0916319	1	0.0302294	1	1	0.056702	1	0.0549883	1	0.0539499	0.0552134	0.0789992	FALSE
Dera	0.0765432	1	0.0029602	1	0.0246201	1	0.0383057	1	0.0258812	1	0.0496467	1	0.0632016	1	-0.0029458	1	0.0498563	1	0.174537	1	0.154884	1	0.192031	1	0.00479976	1	0.044861	1	-0.0714135	1	1	0.0714775	1	0.0451281	1	0.0489482	0.0551846	0.0844573	FALSE
Ltbp3	0.0338951	1	-0.000840436	1	0.054309	1	0.0669309	0.876444	0.0326864	1	0.0736707	1	0.1154	0.00337705	0.0462898	1	0.057051	1	0.169578	1	-0.0329435	1	0.0561451	1	0.143065	1	0.0463874	1	-0.0338941	1	0.309498	0.105774	1	0.0183159	1	0.0414563	0.055182	0.0261322	FALSE
Gm26724	0.0379507	1	0.0620813	0.0634312	0.0649127	1	0.0580304	0.0417734	0.0494416	1	0.0365756	1	0.0340702	1	0.0257174	1	0.0560952	1	0.0637199	1	-0.051938	1	-0.0050305	1	0.138342	1	0.171087	1	0.0862854	1	0.784963	0.0664227	0.854188	0.0512778	1	0.0477677	0.0551561	0.0371033	FALSE
Evi5	0.110978	1	0.116403	0.40104	0.0713379	1	0.0758342	0.853042	0.0705043	1	0.0396729	1	0.0837439	1	0.071298	1	0.0149013	1	-0.0630841	1	0.0308394	1	0.0346324	1	0.297629	1	-0.0180304	1	-0.110008	1	0.999999	0.10102	0.9975	0.0542029	1	0.0101072	0.0551101	0.0839315	FALSE
Kdelc1	0.0309376	1	0.0871053	1	0.0326547	1	0.0333363	1	0.0781362	1	-8.02435e-05	1	0.0351536	1	0.0778837	1	0.0449747	1	0.141256	1	0.0738667	1	0.0643289	1	-0.0962201	1	0.199038	1	0.023962	1	1	0.0288927	1	0.103206	1	0.033168	0.0550889	0.0571771	FALSE
Tnfaip8	0.0770988	1	-0.00891648	1	0.0188798	1	0.0768159	0.0203953	0.0758114	1	0.0537734	1	0.135498	0.0208251	0.0132506	1	-0.0236055	1	0.0442746	1	-0.0134443	1	0.0817215	1	0.172961	1	0.0517684	1	0.0689724	1	0.113962	0.10133	1	0.0236939	1	0.0399483	0.0549907	0.122539	FALSE
Hirip3	0.156584	1	0.0673577	1	0.132862	1	0.0722918	1	0.0358853	1	-0.00689548	1	-0.010996	1	-0.0263344	1	0.0604625	1	0.0758419	1	0.208937	1	0.088105	1	-0.00021954	1	-0.106688	1	0.0773791	1	1	0.0587004	1	0.0358315	1	0.0703826	0.0549715	0.075839	FALSE
Timp3	0.059755	1	-0.151741	1	-0.133571	1	0.0514112	1	0.0253163	1	0.0183564	1	0.083969	1	0.0514673	1	-0.0224704	1	0.329455	1	0.248314	1	0.254448	1	0.0916926	1	-0.110669	1	0.028679	1	1	0.123257	1	0.0125373	1	0.0290884	0.0549607	0.0571546	FALSE
Ash2l	0.064311	1	0.0513843	1	0.0707948	1	0.0789169	1	0.00829718	1	0.00706822	1	0.107476	1	0.0297232	1	0.0528201	1	0.174851	1	0.0326729	1	-0.0423435	1	0.0841911	1	0.018854	1	0.0853791	1	1	0.101949	1	0.0281863	1	0.0347437	0.0549597	0.0875797	FALSE
Arfip1	0.0473386	1	-0.00125194	1	0.0777864	1	0.0661306	0.381974	0.0410815	1	-0.000102042	1	0.0897979	0.0960137	0.0584559	1	0.0058073	1	0.149778	1	0.116077	1	-0.0496639	1	0.167918	1	-0.0202307	1	0.0750591	1	0.761557	0.104193	1	0.0388263	1	0.0217774	0.0549321	0.0190788	FALSE
Dnajb1	-0.0161773	1	0.156315	1	0.208812	1	-0.00463498	1	0.251766	1	0.316531	0.854481	0.0835941	1	0.22101	0.24673	0.0471341	1	0.110919	1	-0.129322	1	-0.153965	1	-0.287394	1	0.0180201	1	0.00122896	1	1	-0.0227386	0.985768	0.103558	0.999999	0.0839483	0.0549225	0.0238824	FALSE
Filip1l	0.219645	1	0.0868266	1	-0.0464654	1	0.141081	0.0270308	0.146791	1	0.0683234	1	0.00453851	1	0.0428237	1	-0.131347	1	0.123059	1	-0.0848791	1	-0.165903	1	0.276872	1	0.153734	1	-0.0112647	1	0.704376	0.153039	1	0.0690592	1	-0.0573315	0.0549223	0.0999316	FALSE
Sacm1l	0.0743519	1	0.0466337	1	0.0363166	1	0.00993366	1	0.0291426	1	-0.0109891	1	0.0648881	1	0.00913068	1	-0.00136961	1	0.118145	1	0.238564	1	-0.0218214	1	0.0997522	1	0.0363304	1	0.094646	1	1	0.0734142	1	0.0719603	1	0.0193565	0.0549103	0.0706035	FALSE
Gcc2	-0.0100721	1	-0.0595177	1	-0.0771152	1	0.0639033	1	0.0714175	1	0.0413847	1	0.0495064	1	0.0304573	1	0.0412881	1	-0.013813	1	0.250286	1	0.162026	1	0.15314	1	0.133444	1	-0.0142999	1	1	0.048533	1	0.0852174	1	0.0306567	0.0548024	0.0712082	FALSE
Tecr	0.0849399	1	0.0517803	1	0.037438	1	0.11271	0.397404	0.0255967	1	0.101228	1	0.118872	0.341257	0.00541689	1	0.0263002	1	0.198969	1	-0.0728976	1	-0.0415236	1	0.309056	1	-0.0242831	1	-0.112364	1	0.947534	0.164909	1	-0.00287735	1	0.00221561	0.0547492	0.145302	FALSE
Prrg1	0.00404211	1	0.0130358	1	0.0292886	1	0.0314964	1	0.0504364	1	0.0519355	1	0.0594794	0.647696	0.0593723	1	0.0511473	1	0.122326	1	0.138161	1	0.0876687	1	0.119819	1	0.0210062	1	-0.0182449	1	0.99991	0.0674324	1	0.0564023	1	0.040359	0.0547313	0.035898	FALSE
Hspa4l	0.085017	1	0.159529	0.00421554	0.229616	1	0.0473041	1	0.021516	1	0.049101	1	0.13413	0.0214885	0.0436267	1	0.0226745	1	0.01219	1	0.0139482	1	-0.00551554	1	0.186913	1	-0.0782282	1	-0.100924	1	0.660015	0.0931108	0.362372	0.0320784	1	0.0389903	0.0547265	-0.0240829	FALSE
Brip1os	0.0965798	1	0.0696316	1	0.0497006	1	0.0344414	1	0.00456447	1	0.0629163	1	0.007617	1	0.0138842	1	-0.00574301	1	0.0270771	1	0.0913704	1	0.102491	1	0.0376894	1	0.0505499	1	0.177498	1	1	0.0406809	1	0.0460001	1	0.0773726	0.0546846	0.0272285	FALSE
Tram1	0.121111	1	0.0419193	1	0.0184586	1	0.0630122	1	0.068645	1	-0.0445774	1	0.126286	0.708383	0.0684526	1	0.00543803	1	0.157126	1	0.133112	1	0.0283857	1	0.0954588	1	0.031428	1	-0.0941728	1	0.99997	0.112599	1	0.0687114	1	-0.0172936	0.0546723	0.114275	FALSE
BC003331	0.060177	1	-0.00844288	1	0.0990335	1	0.0778654	0.25868	-0.0170076	1	0.00943526	1	0.0939425	0.273679	0.0280511	1	0.0179179	1	-0.0660635	1	0.0103425	1	0.127809	1	0.19912	1	0.0526556	1	0.134832	1	0.870554	0.0730083	1	0.0131197	1	0.0778055	0.0546445	0.0886801	FALSE
Tmed5	0.151483	1	0.127534	1	0.130635	1	-0.00332633	1	-0.00149369	1	0.0269626	1	0.00838503	1	-0.00162858	1	0.000903411	1	-0.108182	1	0.0745263	1	0.0895283	1	0.228702	1	-0.122318	1	0.216572	1	1	0.0554125	1	0.0153239	1	0.0929202	0.0545522	0.156201	FALSE
Pabpc4	0.0778144	1	0.153758	0.025222	0.113204	1	0.0415697	1	0.0653139	1	-0.00278578	1	0.00616917	1	-0.00370419	1	0.078707	1	0.133509	1	0.0116292	1	0.11295	1	-0.108483	1	-0.0512381	1	0.18917	1	1	0.0301158	0.69107	0.0351516	1	0.0982491	0.0545055	0.0412179	FALSE
Pvr	0.033713	1	0.0659106	0.134576	0.0198072	1	0.0139679	1	0.0734345	1	0.120856	1	0.0399784	1	0.107857	0.433059	0.104427	1	-0.00386685	1	0.0445807	1	0.099205	1	-0.00314318	1	0.081661	1	0.0187369	1	1	0.0161298	0.840996	0.0746887	1	0.0726063	0.0544749	0.0514963	FALSE
Ankle2	0.0932864	1	0.0805788	0.0945234	0.0687954	1	0.0641152	1	0.0185957	1	0.0304496	1	0.0224948	1	0.0400869	1	0.0533394	1	0.119607	1	0.0201659	1	0.0798925	1	0.0962298	1	0.122854	1	-0.0934798	1	1	0.0791466	0.909214	0.0564562	1	0.0277994	0.0544674	0.0528426	FALSE
Ocel1	0.0469654	1	0.0120634	1	0.0612466	1	0.0380182	1	0.0125355	1	-0.0230825	1	0.0406132	1	0.0650496	1	0.0304665	1	0.146067	1	0.189914	1	0.0856901	1	0.050678	1	0.0652818	1	-0.00545722	1	1	0.0644683	1	0.0689688	1	0.0297727	0.0544032	0.110016	FALSE
Parp2	0.0236747	1	0.003591	1	0.0356736	1	0.0310426	1	-0.0418941	1	-0.0249955	1	0.0446602	1	-0.00358408	1	0.0349158	1	0.197833	1	0.0474646	1	0.0233979	1	0.0526712	1	0.156478	1	0.235067	1	1	0.0699763	1	0.0324111	1	0.0608117	0.0543997	0.0153175	FALSE
Pcdh19	0.048469	1	-0.0714952	1	0.00726247	1	-0.0172399	1	0.0154153	1	-0.0672421	1	0.105951	1	0.0281476	1	-0.01207	1	0.139917	1	0.447786	1	0.0484179	1	0.117789	1	0.0423595	1	-0.0177071	1	1	0.0789771	1	0.0924426	1	-0.00826775	0.054384	0.108796	FALSE
Crk	0.0672589	1	0.10979	1	0.075831	1	0.0207625	1	0.0537335	1	0.0358132	1	0.0116353	1	0.0684424	1	0.0155789	1	-0.0480296	1	0.0733868	1	0.0585016	1	0.0455241	1	0.239654	1	-0.0122938	1	1	0.0194303	1	0.109001	1	0.0346862	0.0543726	0.0349294	FALSE
Dpy19l4	0.0539973	1	0.0503898	1	0.0406812	1	0.0250254	1	0.0621586	1	0.000383424	1	0.0371909	1	0.0305883	1	0.0260509	1	0.0238797	1	0.0294146	1	0.0381751	1	0.072875	1	0.044566	1	0.279483	1	1	0.0425937	1	0.0434235	1	0.0769547	0.054324	0.0305775	FALSE
Helz	0.0782264	1	0.0638689	1	0.0710788	1	0.0867793	0.000660861	0.0904583	1	0.11143	1	0.0686441	1	0.0215254	1	0.0558183	1	0.00538398	1	0.0948083	1	0.0216401	1	0.193503	1	-0.00542801	1	-0.143478	1	0.145593	0.0865073	1	0.0530466	1	0.023298	0.0542839	0.0404466	FALSE
Keap1	0.083622	1	-0.138247	0.410445	0.0106323	1	0.0710428	1	0.0209393	1	0.0432865	1	0.122479	1	0.0289329	1	0.0779782	1	-0.00856372	1	-0.13744	1	0.342557	1	0.306491	1	0.0594152	1	-0.0690185	1	1	0.115014	0.99776	-0.03328	1	0.0810871	0.0542738	0.165519	FALSE
Ino80b	0.0765183	1	0.0356814	1	0.00427147	1	0.0795706	0.00351164	0.0605791	1	0.130656	1	0.086743	0.662708	0.0495098	1	0.0916044	1	0.140035	1	0.109214	1	0.0318876	1	-0.15942	1	0.00525167	1	0.0711922	1	0.2767	0.0446894	1	0.0520473	1	0.0659224	0.0542197	0.0778833	FALSE
Fam120a	0.140286	1	0.099561	1	0.0488437	1	0.0493143	1	0.0881138	1	6.85263e-05	1	0.0457345	1	0.0368949	1	0.0216354	1	-0.0135737	1	0.129446	1	0.128821	1	0.093569	1	-0.0416924	1	-0.0140955	1	1	0.0630659	1	0.0624647	1	0.0370547	0.0541951	0.0376825	FALSE
Trappc6a	0.0229644	1	-0.109381	1	0.0651158	1	0.0803231	0.0722214	0.0479496	1	0.0824541	1	0.0396299	1	0.0521029	1	0.0314664	1	-0.0307746	1	0.334715	1	-0.0536151	1	0.0590962	1	0.0273193	1	0.162749	1	0.873431	0.0342478	1	0.0705411	1	0.057634	0.054141	0.0755901	FALSE
R3hdm2	0.106489	1	0.0886272	1	0.104716	1	0.116581	4.9892e-06	0.0599301	1	0.0291475	1	0.106643	0.0615368	0.00207928	1	0.0461693	1	0.0247716	1	0.0318024	1	-0.0284749	1	0.132439	1	0.0759664	1	-0.0864089	1	0.000858996	0.0973847	1	0.0516811	1	0.0130298	0.0540319	0.0328421	FALSE
Tor1aip1	0.0960639	1	0.0356372	1	0.0699007	1	0.00675545	1	0.0142795	1	0.0551905	1	0.0602509	1	0.0543281	1	-0.0136321	1	0.0367137	1	0.221528	1	0.173248	1	0.0162496	1	0.0605977	1	-0.077189	1	1	0.0432067	1	0.0772741	1	0.0415036	0.0539948	0.113812	FALSE
2009-09-01	0.0662013	1	-0.00178855	1	-0.0297792	1	0.02457	1	0.062943	1	0.0133117	1	0.00387788	1	0.00830885	1	-0.0557966	1	0.0554954	1	0.238464	1	0.0363214	1	0.148037	1	0.0872162	1	0.152325	1	1	0.0596364	1	0.0790287	1	0.0232765	0.0539805	0.0610661	FALSE
Usp9x	-0.00971453	1	0.177807	0.00317722	0.0642919	1	0.0437141	1	0.00545474	1	-0.0207409	1	0.0815615	1	0.0489299	1	0.013663	1	-0.00310263	1	0.289817	1	-0.0111778	1	0.00694583	1	-0.0482973	1	0.170329	1	1	0.0238809	0.319658	0.0947423	1	0.0432731	0.0539654	0.0467894	FALSE
Nfkbil1	0.0762357	1	0.0449061	1	-0.00246889	1	0.0770741	1	0.0480056	1	-0.000274573	1	0.0663841	1	0.0513172	1	0.0882927	1	0.123558	1	0.104296	1	0.121687	1	0.0165597	1	0.0621542	1	-0.0685727	1	1	0.0719624	1	0.0621359	1	0.0277327	0.0539436	0.108549	FALSE
Ing4	0.0225393	1	-0.0166446	1	0.0147083	1	0.0346826	1	0.0789753	1	0.060587	1	0.0667622	1	0.0482147	1	0.0747088	1	0.189072	1	0.0894258	1	-0.0365136	1	0.0507162	1	0.0917918	1	0.0395803	1	1	0.0727545	1	0.0583526	1	0.0306142	0.0539071	0.0837696	FALSE
Ocrl	0.0549476	1	0.018955	1	0.0200331	1	0.0405304	1	0.0349551	1	-0.0160271	1	0.0551839	1	0.0633236	0.508701	0.0494319	1	0.0647846	1	0.116691	1	0.0235562	1	0.163776	1	-0.034698	1	0.152611	1	1	0.0758446	0.999328	0.0398453	1	0.045921	0.0538703	0.0527043	FALSE
Nab2	0.0893299	1	0.0738922	1	0.0444753	1	0.0759673	1	0.00521339	1	0.0606141	1	0.043473	1	0.0476121	1	-0.000391197	1	0.077466	1	0.0397599	1	0.0565456	1	0.0746959	1	0.177457	1	-0.0581468	1	1	0.0721864	1	0.0687869	1	0.0206194	0.0538642	0.079427	FALSE
Svil	0.00114238	1	0.00252182	1	0.0403512	1	0.0642669	0.320804	0.025665	1	0.0337878	1	0.0136213	1	0.00562527	1	-0.0209606	1	0.0383091	1	0.101472	1	0.0155827	1	0.17308	1	0.0673274	1	0.246152	1	0.993778	0.058084	1	0.0405223	1	0.0629826	0.053863	0.0214669	FALSE
Anxa7	0.0111405	1	-0.00357654	1	0.0272887	1	0.0309211	1	0.0586641	1	0.0163748	1	0.0270333	1	0.0104393	1	-0.0492348	1	0.0860582	1	0.142982	1	0.186436	1	0.217758	1	0.146565	1	-0.101522	1	1	0.0745822	1	0.0710147	1	0.0158686	0.0538218	0.0629064	FALSE
Ube4a	0.0482238	1	0.0414685	1	0.0515428	1	0.0499381	1	0.0477691	1	0.0073178	1	0.0393802	1	0.0274581	1	0.0555523	1	0.146175	1	0.133388	1	0.0228868	1	0.00121195	1	0.0454171	1	0.0895709	1	1	0.0569858	1	0.0591001	1	0.0453741	0.05382	0.0476875	FALSE
Pold3	0.0503542	1	0.00568773	1	0.0459672	1	0.0309353	1	0.0181926	1	0.0468508	1	0.03548	1	0.0278233	1	0.094554	1	0.077065	1	-0.0189052	1	0.185045	1	0.0776428	1	-0.0271694	1	0.157297	1	1	0.0542955	1	0.00112579	1	0.105943	0.0537881	0.0789135	FALSE
B3gat3	0.0439098	1	-0.0150644	1	0.0563733	1	0.00971097	1	0.0247629	1	0.0375132	1	0.0364786	1	0.0735024	1	0.0278312	1	0.102568	1	0.159988	1	-0.0553984	1	0.0315584	1	0.11825	1	0.154407	1	1	0.0448451	1	0.0722878	1	0.0441452	0.0537594	0.0730946	FALSE
Uvssa	0.0810238	1	0.00224421	1	0.0375454	1	0.0876093	0.00577592	0.0278424	1	-0.0157053	1	0.0879831	0.00197199	0.038732	1	0.0404766	1	-0.0135836	1	0.0689596	1	0.0375403	1	0.176495	1	0.0963605	1	0.0525268	1	0.0116459	0.0839056	1	0.0468277	1	0.0304768	0.0537367	0.0546886	FALSE
Zfp871	0.0721282	1	0.100992	0.00075423	0.0843077	1	0.0478128	1	0.0733584	1	0.0271017	1	0.0433996	1	0.0561893	1	0.0742351	1	-0.025203	1	-0.0946713	1	0.0788568	1	0.166081	1	-0.0244839	1	0.125208	1	1	0.0608438	0.156369	0.0222768	1	0.0779419	0.0536875	0.0504628	FALSE
Ulk2	0.0319858	1	0.0063071	1	0.00167265	1	0.0828965	0.0120207	0.0843316	1	0.00546211	1	0.121563	0.0207517	0.0530222	1	0.00332789	1	0.108686	1	0.204855	1	-0.0123427	1	0.136849	1	-0.0433203	1	0.0190398	1	0.0838813	0.096396	1	0.0610391	1	0.00343194	0.0536223	0.0579476	FALSE
Piga	0.0458257	1	0.0585225	1	0.0621068	1	0.0383409	1	0.0676728	1	0.0715209	1	0.0537214	1	0.0436725	1	0.0545199	1	0.065513	1	0.119645	1	-0.0229146	1	0.0272041	1	0.0473645	1	0.0714615	1	1	0.046121	1	0.0673754	1	0.0473389	0.0536118	0.0807297	FALSE
Secisbp2l	0.073642	1	0.0489554	1	0.0240868	1	0.0172028	1	0.0342942	1	-0.0105465	1	0.0546614	1	0.0495995	1	0.0379517	1	0.190212	1	-0.0791928	1	0.071029	1	0.192006	1	0.032065	1	0.0681083	1	1	0.105545	1	0.0171443	1	0.0381259	0.053605	0.016656	FALSE
Snx10	0.0263914	1	0.0648781	1	0.0786582	1	0.0628577	1	0.0864698	1	0.138508	1	0.0344739	1	0.0956268	1	0.0881957	1	0.0237193	1	-0.0293257	1	0.0522618	1	0.0148492	1	0.229951	1	-0.16375	1	1	0.0324583	1	0.08952	1	0.0387748	0.0535844	0.0613091	FALSE
Dpysl2	0.0350927	1	0.0113254	1	0.0517314	1	0.0193708	1	0.052522	1	-0.0509007	1	0.028804	1	0.0172785	1	0.0400178	1	0.0836717	1	0.217965	1	0.181452	1	0.020049	1	0.117289	1	-0.0231247	1	1	0.0373976	1	0.0832759	1	0.0398351	0.0535029	0.0357973	FALSE
Wdr36	-0.0509315	1	-0.0577678	1	0.0691692	1	0.0481928	1	0.0572418	1	0.0489484	1	0.056689	1	0.0376583	1	0.0282217	1	0.047198	1	0.182664	1	0.212998	1	0.0371855	1	0.036554	1	0.048199	1	1	0.0276668	1	0.05127	1	0.0815072	0.0534813	0.0385888	FALSE
Larp4b	-0.0320348	1	0.0769129	1	0.0844623	1	0.0751624	1	0.0298582	1	0.0423767	1	0.0859264	1	0.0504052	1	0.069949	1	0.0038682	1	0.099296	1	0.226283	1	0.0144419	1	0.0260138	1	-0.0519488	1	1	0.0294728	1	0.0564972	1	0.0742245	0.0533982	0.0651006	FALSE
B9d1	0.0935996	1	0.0834088	1	0.026727	1	0.0442259	1	0.00114376	1	0.037417	1	0.0372281	1	0.0341017	1	0.0708056	1	0.155577	1	0.0268419	1	0.0826817	1	0.0242855	1	-0.00359958	1	0.0860197	1	1	0.0709832	1	0.0283793	1	0.0607302	0.0533642	0.0840994	FALSE
Ltbp1	0.080772	1	0.069921	1	-0.00409907	1	0.0157984	1	0.00140566	1	0.0252494	1	0.0496086	1	0.0224019	1	0.0524044	1	0.139226	1	0.0326383	1	0.199973	1	-0.0633914	1	0.0787237	1	0.0997323	1	1	0.0444027	1	0.0410181	1	0.074652	0.0533576	0.0228762	FALSE
Stx2	0.127418	1	0.0479684	1	0.0497487	1	0.0909215	0.0113271	0.0509669	1	0.0437141	1	0.0702958	1	0.0482986	1	0.0164411	1	0.0387011	1	-0.0177266	1	0.0166062	1	0.167395	1	0.105693	1	-0.0565692	1	0.535798	0.0989464	1	0.0470402	1	0.0139882	0.0533249	0.0325696	FALSE
Taf6	0.0442758	1	0.0721916	1	0.0512233	1	0.0264243	1	0.00653608	1	0.064348	1	0.0472293	1	0.0592195	1	0.0868357	1	-0.0369653	1	-0.0614474	1	0.0855533	1	0.190462	1	0.0838437	1	0.0794405	1	1	0.0542853	1	0.0320687	1	0.0734801	0.053278	0.0177348	FALSE
Picalm	0.137431	1	0.0724343	1	0.0541808	1	0.0273526	1	0.0798322	1	-0.00717806	1	0.0115389	1	0.0711172	0.171157	0.0277467	1	-0.0057394	1	0.0047497	1	0.00155752	1	0.204193	1	0.17529	1	-0.055467	1	1	0.0749553	0.966058	0.0806847	1	0.00416799	0.0532693	0.0314306	FALSE
Pbx1	0.0879956	1	-0.0779822	1	0.0719858	1	0.0730291	1	0.0669443	1	-0.0415384	1	0.186854	7.96526e-06	-0.0230428	1	-0.0117023	1	-0.0348269	1	-0.0213267	1	0.0787732	1	0.170991	1	0.14666	1	0.126068	1	0.00910431	0.0968086	1	0.0182506	1	0.0447172	0.0532588	0.0409479	FALSE
Casp3	0.065416	1	0.0254734	1	0.0199927	1	0.0611991	1	0.00889836	1	-0.0571721	1	0.0849659	1	0.0178403	1	0.0252314	1	0.216822	1	0.315746	1	0.200504	1	0.0610552	1	-0.0886476	1	-0.15891	1	1	0.0978916	1	0.0558621	1	0.0059293	0.0532277	0.0566413	FALSE
Mgat4b	0.117649	1	0.0977436	1	-0.0207894	1	0.00436312	1	0.0346514	1	0.00133233	1	-0.0942139	1	0.0282141	1	-0.0110974	1	0.105684	1	0.201743	1	0.0552499	1	0.00278311	1	0.126093	1	0.14828	1	1	0.0272531	1	0.097689	1	0.0345951	0.0531791	0.0553666	FALSE
Chd2	0.0865134	1	0.0718566	1	0.0613008	1	0.0602155	1	0.117928	1	0.00977989	1	0.0360377	1	0.089357	1	0.0879561	1	-0.0586468	1	-0.0534612	1	0.0294833	1	0.068811	1	0.146722	1	0.0432355	1	1	0.0385862	1	0.0744804	1	0.0463511	0.0531392	0.0384937	FALSE
Rspry1	0.0309264	1	0.0685088	1	0.0558128	1	0.0624845	0.41458	0.00968954	1	-0.00215672	1	0.102557	0.00446085	0.071218	0.467446	0.0527285	1	0.0371917	1	0.0196284	1	0.0580484	1	0.0828847	1	0.100975	1	0.0452626	1	0.24776	0.0632089	0.998869	0.0540039	1	0.0419391	0.0530506	0.0598293	FALSE
Gtf2h4	0.103894	1	0.0631511	1	0.0874423	1	0.0202323	1	0.0050062	1	0.00417351	1	0.00708641	1	-0.0354157	1	0.0723419	1	0.0408503	1	0.0757179	1	0.0933735	1	-0.00429773	1	0.0477888	1	0.214335	1	1	0.033553	1	0.0312497	1	0.0943332	0.0530453	0.059938	FALSE
Arl13b	-0.00612936	1	0.0346707	1	0.0491153	1	0.0501894	1	0.0749257	1	0.0665238	1	0.0351186	1	0.00473684	1	0.0900611	1	0.108892	1	0.0240869	1	0.0348372	1	0.107314	1	0.0234804	1	0.097527	1	1	0.0590769	1	0.0323801	1	0.0676129	0.0530233	0.0435589	FALSE
Dok1	0.13288	1	0.0162085	1	0.0577973	1	0.0787824	0.15818	0.129623	1	-0.0629863	1	0.0976331	1	0.0523019	1	0.0467926	1	0.066509	1	0.207749	1	-0.00917108	1	0.0459109	1	-0.105598	1	0.0408959	1	0.960325	0.0843431	1	0.0600569	1	0.0146657	0.0530219	0.181568	FALSE
Csde1	0.117317	1	0.11377	0.61612	0.0513425	1	0.0886148	0.94225	0.00987542	1	-0.0404377	1	0.072481	1	0.00801608	1	0.0198803	1	0.283665	1	0.0106995	1	-0.0735942	1	0.136077	1	-0.0135086	1	0.0100697	1	1	0.139631	0.999851	0.0257706	1	-0.00654789	0.0529512	0.0334876	FALSE
Myo9a	0.0783196	1	0.0445014	1	0.0142647	1	0.0647956	0.422099	0.060969	1	0.0638329	1	0.0446242	1	0.0441608	1	-0.0171672	1	0.038102	1	0.21364	1	0.0243678	1	0.117201	1	-0.0259115	1	0.0284861	1	0.998046	0.0686085	1	0.067472	1	0.0227569	0.0529458	0.0683212	FALSE
Akt3	0.124886	1	0.0220373	1	0.0686944	1	0.0411968	1	0.0530764	1	0.0173526	1	0.0936092	0.00172639	0.0847464	0.0369274	0.0206226	1	0.118775	1	0.038475	1	-0.0273979	1	0.0887767	1	0.0233739	1	0.0249733	1	0.239548	0.0934488	0.762809	0.0443418	1	0.020849	0.0528799	0.0424258	FALSE
Smarca4	0.156634	1	0.0721991	1	0.069264	1	0.08721	1	0.0609003	1	0.0109722	1	0.0913644	1	0.00129041	1	0.0827719	1	0.0439243	1	0.0642026	1	0.0592089	1	0.0945036	1	-0.0478919	1	-0.0535003	1	1	0.0947273	1	0.0301401	1	0.0337434	0.0528702	0.114204	FALSE
Rab11a	-0.00395628	1	-0.017124	1	0.0035163	1	0.0314978	1	0.0843813	1	0.075014	1	0.0340305	1	0.0646755	1	-0.0074361	1	0.195496	1	0.149693	1	0.151574	1	-0.000326697	1	0.0763466	1	-0.044431	1	1	0.0513483	1	0.0715946	1	0.0356474	0.0528634	0.0913918	FALSE
Tln2	0.053202	1	0.0593628	1	0.0769076	1	0.0431135	1	0.0200139	1	0.0664439	1	0.0121041	1	0.0296032	1	0.0227585	1	0.234743	1	0.025622	1	-0.0181862	1	0.158191	1	0.0201313	1	-0.0115218	1	1	0.100271	1	0.0309467	1	0.0272804	0.0528326	0.0105692	FALSE
Tnks	0.0318923	1	0.0163696	1	0.0573391	1	0.0415629	1	-0.00235686	1	0.0146618	1	0.040552	1	0.0482617	1	0.0600309	1	-0.0957467	1	0.119624	1	-0.0424185	1	0.183466	1	0.0659648	1	0.253108	1	1	0.0403453	1	0.0495727	1	0.0685442	0.0528207	0.028527	FALSE
Chst11	0.0846574	1	0.0628336	1	0.00155499	1	-0.0251962	1	0.00610564	1	0.012599	1	0.0466405	1	0.0210181	1	0.0141659	1	0.059373	1	0.174148	1	0.0297888	1	0.0604253	1	0.069406	1	0.174593	1	1	0.04518	1	0.0667022	1	0.0465403	0.0528075	0.0357538	FALSE
Stat6	0.0765724	1	0.0708878	1	0.114566	1	0.0443832	1	0.055598	1	0.0168332	1	0.0167338	1	0.0656748	1	0.0016993	1	-0.0562815	1	0.166599	1	-0.0115287	1	0.0812516	1	0.0245507	1	0.124097	1	1	0.0325319	1	0.076662	1	0.0491334	0.0527758	0.0382849	FALSE
Uhrf1	0.120383	1	0.0949508	1	0.123163	1	0.0384378	1	0.0219282	1	0.113814	1	-0.0104111	1	-0.0610737	1	0.0827438	1	0.0760458	1	-0.0162232	1	0.133644	1	0.0243585	1	-0.0189405	1	0.067788	1	1	0.0497628	1	0.00412832	1	0.104231	0.0527072	0.0457971	FALSE
Ascc2	0.0349863	1	0.0512026	1	0.0592937	1	0.021877	1	-0.0162103	1	0.0169768	1	0.0329721	1	0.0215505	1	0.0118642	1	0.0770404	1	0.0646966	1	0.0938374	1	0.107941	1	0.060732	1	0.151792	1	1	0.0549633	1	0.0363943	1	0.0667528	0.0527035	0.0410383	FALSE
Upp2	0.0248798	1	0.0708675	0.601683	0.0173814	1	0.0443783	1	0.0336372	1	0.010052	1	0.0538019	1	0.101985	2.78786e-06	0.00269051	1	0.0710598	1	0.203885	0.125974	0.0181414	1	0.100618	1	0.0791056	1	-0.0421239	1	1	0.0589475	0.000647652	0.0978962	1	0.0012283	0.0526907	0.0366667	FALSE
Glce	0.0145476	1	0.0317346	1	0.0329017	1	0.046887	0.565491	0.0596616	1	0.0529204	1	0.0346994	1	0.0372625	1	0.0112322	1	0.0251372	1	0.15153	1	0.0344091	1	0.0926075	1	0.0979879	1	0.0665659	1	0.999687	0.0427757	1	0.0756353	1	0.0396058	0.0526723	0.0343189	FALSE
Smarcd2	-0.0111359	1	0.00457286	1	0.0237193	1	0.00940028	1	-0.00626981	1	-0.00875747	1	0.0214222	1	0.0112341	1	0.0091869	1	0.0479826	1	0.212585	1	0.145288	1	0.0548646	1	0.127295	1	0.148433	1	1	0.0245068	1	0.0698835	1	0.0635739	0.0526547	0.0615539	FALSE
Pole4	0.039727	1	0.0421483	1	0.0854112	1	0.0257159	1	0.0712945	1	0.0625178	1	0.0506447	1	-0.00844448	1	0.0437323	1	0.166758	1	0.135374	1	0.0510552	1	-0.0381173	1	0.0741177	1	-0.0122367	1	1	0.0489456	1	0.0628979	1	0.046096	0.0526465	0.0574096	FALSE
2900026A02Rik	0.0821346	0.128575	0.0205643	1	0.0266959	1	0.100875	3.86573e-08	0.0641006	1	0.0306448	1	0.145485	2.35702e-12	0.0215501	1	0.0562794	1	0.141573	1	0.0197504	1	0.0215604	1	0.0650302	1	0.00183141	1	-0.00841577	1	2.36704e-15	0.10702	1	0.0255594	1	0.025353	0.052644	0.0890383	FALSE
Tm9sf4	0.0259958	1	0.0888774	1	0.028088	1	0.0996246	0.0816759	0.0959228	1	0.0718418	1	0.0816265	1	0.0621793	1	0.0345145	1	0.160001	1	-0.0154227	1	0.150871	1	0.054152	1	-0.0948392	1	-0.055137	1	0.89051	0.0842799	1	0.0273435	1	0.0460356	0.052553	0.0570175	FALSE
Ptgr1	0.0408254	1	0.0472194	1	0.0561541	1	0.104248	0.00122413	0.0836949	1	0.0591998	1	0.0252331	1	0.00976754	1	-0.0293196	1	0.24696	1	0.212574	1	-0.0335682	1	0.193865	1	-0.103344	1	-0.12536	1	0.201589	0.122226	1	0.0499823	1	-0.0145787	0.0525433	0.0640038	FALSE
Srek1	0.0312678	1	0.0513408	1	0.114879	1	0.0261208	1	0.0929608	1	0.0635279	1	0.0486554	1	0.069124	1	0.0922741	1	0.168395	1	0.0462147	1	-0.0282668	1	-0.034982	1	-0.063013	1	0.109318	1	1	0.0478915	1	0.0393255	1	0.0703466	0.0525212	0.0637805	FALSE
CT025619.1	0.0448168	1	0.0454027	1	0.00566476	1	0.052096	0.245645	0.018236	1	0.0393024	1	0.116453	2.42333e-05	0.108861	5.02331e-09	0.0106829	1	0.080055	1	0.023094	1	0.0526214	1	0.0279928	1	0.0796851	1	0.0828441	1	0.00743412	0.0642828	3.47693e-05	0.0550557	1	0.0382231	0.0525205	0.034146	FALSE
Plxnb2	0.0718446	1	0.059639	1	0.0409593	1	0.0596066	1	0.0949901	1	0.0262994	1	0.0164742	1	-0.0204668	1	-0.0323912	1	0.182993	1	0.0551386	1	0.0569032	1	0.132494	1	0.0118138	1	0.0313362	1	1	0.0926823	1	0.0402229	1	0.0246213	0.0525089	0.0769385	FALSE
Xrn1	0.139128	1	0.0460836	1	0.0726641	1	0.104544	3.13808e-05	0.04093	1	0.0322141	1	0.11846	0.00314917	0.0837893	1	0.0377004	1	0.000422128	1	0.0784935	1	0.129741	1	0.115884	1	-0.154134	1	-0.0582886	1	0.000362396	0.0956875	1	0.0190324	1	0.0428061	0.0525087	0.0345861	FALSE
Bfar	0.0511705	1	0.0842992	0.142985	0.0182162	1	0.0183376	1	0.0513686	1	0.0215267	1	0.0343758	1	0.0433466	1	0.00509211	1	0.0885784	1	0.0746728	1	-0.0105945	1	0.103466	1	0.0477766	1	0.155799	1	1	0.0591857	0.952172	0.0602928	1	0.038008	0.0524955	0.0302501	FALSE
Coro1b	-0.015019	1	0.0222853	1	-0.0324482	1	0.0337128	1	0.00201559	1	-0.0283134	1	0.0865413	0.351904	0.0473916	1	0.073113	1	0.1784	1	0.259348	1	0.0763878	1	0.031853	1	0.0374799	1	0.0145829	1	0.995613	0.0630976	1	0.0737041	1	0.0206644	0.0524887	0.0780399	FALSE
Ube2w	0.0355678	1	0.0311594	1	0.090006	1	0.0152436	1	0.101858	1	-0.0226798	1	0.0668734	1	0.0973863	0.00630921	-0.023639	1	0.0210525	1	0.0248858	1	-0.00703663	1	0.125046	1	-0.0147383	1	0.245882	1	1	0.0527566	0.429034	0.0481103	1	0.0565065	0.0524578	0.0299416	FALSE
Asap1	0.121124	1	-0.100313	1	-0.176584	1	0.177131	2.40386e-06	-0.0202644	1	-0.0748552	1	0.116173	1	-7.56563e-05	1	-0.0984238	1	0.124743	1	0.168144	1	0.015842	1	0.363549	1	0.0182854	1	0.151728	1	0.00390937	0.180544	1	0.0131553	1	-0.0364586	0.0524135	0.122123	FALSE
Smim19	0.0173441	1	-0.0441179	1	0.00937356	1	0.0201511	1	0.0717101	1	0.121974	1	0.0543825	1	0.0212051	1	0.0421383	1	0.115399	1	0.020056	1	0.0309326	1	0.0505645	1	0.153806	1	0.100606	1	1	0.0515683	1	0.0445318	1	0.0610049	0.0523683	0.00756004	FALSE
Zfp451	0.095868	1	0.103584	0.70878	0.0694904	1	0.00954005	1	0.0176028	1	0.00688982	1	0.108258	1	0.0507035	1	0.12174	1	-0.0104322	1	0.0260434	1	-0.0582173	1	0.0255846	1	0.216252	1	0.00237908	1	1	0.0457636	0.99997	0.0828372	1	0.0284564	0.0523524	0.0716389	FALSE
Smtn	-0.00484833	1	0.0263043	1	0.0378567	1	0.0219464	1	0.0608792	1	0.075769	1	0.0134094	1	0.035738	1	0.150573	1	-0.120595	1	0.0741692	1	0.118346	1	0.120295	1	0.020847	1	0.154529	1	1	0.00604138	1	0.0435875	1	0.107415	0.0523479	0.0128268	FALSE
Zfp609	0.0317318	1	0.0263965	1	-0.000120133	1	0.013705	1	0.0673124	1	-0.00953894	1	0.0380927	1	0.0484924	1	0.018414	1	0.119718	1	0.0934276	1	0.0792278	1	0.169873	1	0.100848	1	-0.0124163	1	1	0.0746243	1	0.0672954	1	0.0151133	0.0523443	0.0190912	FALSE
Pds5b	0.00662149	1	0.0233786	1	0.108802	1	0.0845101	1	0.0430125	1	0.0526111	1	0.0297743	1	0.00942286	1	0.0593742	1	-0.0543189	1	-0.0621083	1	0.160132	1	0.102601	1	-0.010626	1	0.2318	1	1	0.0338377	1	0.000615935	1	0.122544	0.0523325	0.0359432	FALSE
Zufsp	0.0541356	1	0.0543244	0.505721	0.0870614	1	0.0342587	1	0.0699436	1	0.0101269	1	0.0409702	1	0.0476375	1	0.0450106	1	0.0495405	1	0.0870515	1	0.0653998	1	0.0673215	1	0.0723671	1	-0.000661945	1	1	0.0492453	0.999301	0.0662648	1	0.0413873	0.0522992	0.0233277	FALSE
Ube2d1	0.0426078	1	0.0114542	1	-0.0340536	1	0.00924464	1	0.0770282	1	0.0271794	1	0.0495669	1	0.0527387	1	0.0680466	1	0.18392	1	0.134806	1	0.0677392	1	0.18357	1	-0.0547024	1	-0.0352557	1	1	0.0937819	1	0.044265	1	0.0187312	0.0522593	0.0351419	FALSE
Pfdn6	0.0363273	1	0.0267634	1	0.0667573	1	-0.0236573	1	0.0109072	1	0.0620216	1	-0.0282043	1	0.022714	1	0.103693	1	0.152114	1	0.0095027	1	0.311275	0.162663	-0.0529041	1	0.00735252	1	0.0783675	1	1	0.0167352	1	0.015448	0.96242	0.124423	0.052202	0.163363	FALSE
Zfp704	0.0711548	1	0.0191514	1	-0.0080427	1	0.0446822	1	0.0427411	1	-0.00602252	1	0.0543369	1	0.0572641	1	0.0287159	1	-0.0359482	1	0.143952	1	0.0643464	1	-0.00967665	1	0.227235	1	0.0890462	1	1	0.0249098	1	0.0980688	1	0.0336087	0.0521957	0.0773733	FALSE
Ifnar1	0.0668355	1	0.0631383	1	0.0486991	1	0.0670959	0.00856624	0.0708365	1	0.0805385	1	0.0286415	1	0.0190388	1	0.0415609	1	0.0602394	1	0.0422933	1	-0.0417332	1	0.142988	1	0.0850946	1	0.0074544	1	0.483577	0.07316	1	0.0560803	1	0.0273039	0.0521814	0.0576047	FALSE
Dstyk	0.0884627	0.508354	0.0425729	1	0.0436036	1	0.0430114	1	0.0434636	1	0.0333505	1	0.0436559	1	0.0296464	1	0.0173267	1	0.112474	1	0.134202	1	-0.0141702	1	0.0317636	1	0.0855911	1	0.047603	1	0.999325	0.0638735	1	0.0670952	1	0.0255427	0.0521705	0.0561104	FALSE
Chd8	0.0688825	1	0.0622964	1	0.0774468	1	0.0744981	0.146698	0.0261986	1	0.0747908	1	0.0900377	1	0.00358602	1	0.0218073	1	0.0497888	1	0.0454368	1	0.111263	1	0.102849	1	0.0118432	1	-0.0390326	1	0.954328	0.0772112	1	0.0298722	1	0.0492551	0.0521128	0.0707114	FALSE
Mob4	0.0767069	1	-0.00159387	1	-0.018181	1	0.0265308	1	0.0587129	1	0.0497843	1	0.0462223	1	0.087275	1	-0.000794866	1	0.0330643	1	-0.032712	1	0.150633	1	0.140395	1	0.114183	1	0.0513064	1	1	0.0645839	1	0.045173	1	0.0465495	0.0521021	0.108599	FALSE
Rpl31	0.0176376	1	0.105038	0.335166	0.119282	1	-0.0402376	1	-0.0495094	1	0.100608	1	-0.011001	1	0.00942313	1	0.103068	0.183309	-0.0222512	1	-0.0671367	1	0.133416	1	0.0367518	1	0.0298293	1	0.315698	1	1	-0.00382007	0.994703	0.00552894	0.970602	0.154414	0.0520411	-0.296776	FALSE
B4galnt1	0.0471916	1	0.015093	1	0.0275557	1	0.0621072	0.0416483	-0.00218392	1	-0.00857284	1	0.0474633	1	0.0637683	1	0.0488816	1	0.234373	1	0.098597	1	0.0249123	1	0.0351304	1	0.119942	1	-0.0338357	1	0.784432	0.0852532	1	0.0590432	1	0.0117882	0.0520282	0.0669503	FALSE
Mrpl45	0.0249574	1	-0.0405702	1	-0.00813391	1	0.148375	2.66498e-08	0.0662562	1	0.0157147	1	0.0377024	1	-0.0130867	1	0.0650675	1	0.0247812	1	0.00583326	1	0.0752688	1	0.256053	1	0.193701	1	-0.0717879	1	0.000130842	0.0983738	1	0.0424267	1	0.0152258	0.0520088	0.0614128	FALSE
Gid4	0.0715492	1	0.0576624	1	0.0758062	1	0.0502206	1	0.051455	1	0.120698	1	0.0741446	1	0.0763917	1	0.0546529	1	-0.148676	1	0.0413061	1	0.0611002	1	-0.0329326	1	0.0707621	1	0.154152	1	1	0.00286119	1	0.0595155	1	0.0932818	0.0518862	0.0420195	FALSE
Tbc1d20	-0.014463	1	0.0389506	1	0.0203208	1	0.0500985	1	0.0500482	1	0.0515901	1	0.0152717	1	0.044502	1	0.0454248	1	0.061946	1	0.0880411	1	0.121417	1	0.165447	1	0.0610657	1	-0.0220443	1	1	0.0556601	1	0.0565215	1	0.0433416	0.0518411	0.0530767	FALSE
Dsel	0.0480299	1	0.0119317	1	0.0297534	1	0.0345005	1	0.0655586	1	0.0156737	1	0.0485938	1	0.0710667	0.0206969	0.03812	1	0.0901605	1	0.0552225	1	0.0649377	1	0.0728856	1	0.0636178	1	0.0673887	1	1	0.0588341	0.652701	0.0534794	1	0.0431747	0.0518294	0.0619534	FALSE
Atg16l2	0.0305278	1	0.0391665	1	0.0110286	1	0.00351734	1	0.012847	1	0.0127204	1	0.0142869	1	0.0191635	1	0.0130531	1	0.0569934	1	0.0814998	1	0.0605627	1	0.121508	1	0.144322	1	0.156167	1	1	0.0453666	1	0.0593997	1	0.0507064	0.0518242	0.0400988	FALSE
Rcor3	0.00642561	1	0.00452014	1	0.0263331	1	0.0588264	1	0.0499333	1	0.00316883	1	0.0274651	1	0.0515621	1	0.0069637	1	0.27353	1	0.0759675	1	0.0673867	1	0.04358	1	-0.0171019	1	0.0984805	1	1	0.0819655	1	0.0329762	1	0.0404666	0.0518028	0.0659163	FALSE
Slc25a1	0.0415277	1	0.0301439	1	0.0289123	1	0.0536379	1	0.00453902	1	0.0376977	1	0.0292263	1	0.0325881	1	0.0311144	1	0.0908157	1	0.0758691	1	-0.0135735	1	0.0542955	1	0.104797	1	0.174415	1	1	0.0539006	1	0.0495873	1	0.0517132	0.0517337	-0.000777226	FALSE
Pdpk1	-0.032033	1	0.0838232	1	0.0177506	1	0.0565408	1	0.0584612	1	0.0396303	1	0.0737764	1	0.0401495	1	0.0902664	1	-0.109337	1	0.12763	1	-0.00578713	1	0.0219331	1	0.0152042	1	0.297142	1	1	0.0021761	1	0.0650536	1	0.0878005	0.0516767	0.0333407	FALSE
Tep1	0.0538241	1	0.0473259	0.630805	0.0353	1	0.0249314	1	0.0182601	1	0.0417834	1	0.0412223	1	0.0150121	1	0.0179964	1	0.0267799	1	0.0581957	1	0.131293	1	0.142688	1	0.072379	1	0.0480919	1	1	0.0578891	0.999882	0.0422345	1	0.054893	0.0516722	0.0284698	FALSE
Tjp1	0.0836319	1	0.0585048	1	0.0644195	1	0.110204	0.000514417	0.0676462	1	0.120702	1	0.148848	0.00148702	0.0923765	1	0.0611663	1	-0.02514	1	-0.030858	1	0.126622	1	0.00463465	1	-0.118492	1	0.00943999	1	0.00169741	0.0644357	1	0.0138356	1	0.0764701	0.0515805	0.0855489	FALSE
Pkd1	0.0508538	1	0.0997914	0.0260304	0.0632427	1	0.0218636	1	0.038959	1	-0.0196185	1	0.0200745	1	0.0641405	1	0.0308554	1	0.0704748	1	-0.00923075	1	0.0423411	1	0.0883036	1	0.0273678	1	0.184054	1	1	0.0503141	0.697142	0.0442056	1	0.0601749	0.0515649	0.0582601	FALSE
Gfpt1	-0.0151681	1	-0.0099844	1	0.0110928	1	0.0547574	1	0.0350535	1	-0.00281533	1	0.0421384	1	0.0122499	1	0.0248948	1	0.127422	1	-0.0660981	1	0.129806	1	0.163117	1	0.0528262	1	0.214025	1	1	0.0744533	1	0.00480943	1	0.0754006	0.0515544	0.0116637	FALSE
Pank1	0.040862	1	0.00995826	1	0.0550879	1	0.0352322	1	0.0408729	1	0.0345638	1	0.0607599	1	0.0468966	1	0.0162143	1	0.0451227	1	0.119931	1	0.166882	1	-0.0562642	1	0.0365957	1	0.119682	1	1	0.0251425	1	0.0508509	1	0.0784861	0.0514932	0.0640334	FALSE
Dhx57	0.0454685	1	0.0405969	1	0.0195969	1	0.03929	1	0.0173844	1	0.0342037	1	0.0675022	1	0.0407731	1	0.0336022	1	0.0708847	1	0.0649801	1	-0.0123812	1	0.144653	1	0.0211252	1	0.144228	1	1	0.0735597	1	0.0369719	1	0.0438499	0.0514605	0.0329145	FALSE
Pdia4	0.142801	1	0.121345	0.167674	0.0528131	1	0.114851	0.168675	0.141551	1	0.0457966	1	0.0757052	1	0.0452299	1	-0.00955439	1	0.0443881	1	0.0686285	1	-0.0959972	1	0.0614627	1	0.0500542	1	-0.0873511	1	0.965037	0.0878417	0.964616	0.0853617	1	-0.0188586	0.0514483	0.160839	FALSE
Slc44a1	0.070367	1	0.0677198	1	0.0468187	1	0.038853	1	0.0402485	1	-0.0365985	1	0.0194233	1	0.0177772	1	0.0191195	1	0.132554	1	0.0648816	1	0.0404593	1	0.103677	1	0.0412334	1	0.104348	1	1	0.0729749	1	0.0463721	1	0.0348295	0.0513922	0.01202	FALSE
Tkt	0.154629	1	0.0882652	1	0.0881519	1	0.00627447	1	-0.04532	1	-0.0223844	1	0.00540252	1	-0.0750288	1	-0.0288005	1	0.115893	1	0.172638	1	0.160082	1	0.140766	1	-0.0374118	1	0.0473416	1	1	0.0845931	1	0.0206285	1	0.0488781	0.0513666	0.064912	FALSE
Cmip	0.0348283	1	0.017993	1	-0.00472411	1	0.0776951	0.345875	0.0430342	1	0.121172	1	0.128609	0.000546893	0.0641616	1	0.0569644	1	0.129948	1	-0.1311	1	-0.0590478	1	0.193838	1	0.0452438	1	0.0514821	1	0.0711979	0.112984	1	0.00786645	1	0.0331692	0.0513398	0.0912218	FALSE
Mbd2	0.0396471	1	0.0268347	1	0.0269768	1	0.0321293	1	0.0669703	1	-0.00480551	1	0.0642109	1	0.0971417	1	0.024173	1	0.173903	1	0.190416	1	-0.114543	1	0.23994	1	-0.0631821	1	-0.0301422	1	1	0.109966	1	0.0636361	1	-0.0196682	0.0513113	0.103675	FALSE
Mmgt2	-0.00308108	1	0.0111967	1	0.037607	1	0.0278547	1	0.0432904	1	0.0147009	1	0.0290323	1	0.0203115	1	0.0299508	1	-0.00519647	1	0.108987	1	-0.0407994	1	0.137195	1	0.143358	1	0.215001	1	1	0.0371609	1	0.0654289	1	0.0512921	0.0512939	0.0850621	FALSE
Slc41a1	-0.0211354	1	0.0117724	1	0.0463451	1	0.0304291	1	0.0185619	1	0.124413	1	0.0496203	1	0.0367446	1	0.0504033	1	0.109515	1	0.0763009	1	0.0850204	1	0.0975644	1	0.0151013	1	0.0386368	1	1	0.0531986	1	0.0316962	1	0.0689637	0.0512862	0.0275714	FALSE
Actr3	0.139944	1	-0.0389146	1	0.0910378	1	0.00505827	1	0.0431865	1	-0.0219432	1	0.00775112	1	-0.00326381	1	0.00476687	1	0.231268	1	0.224587	1	0.0284344	1	0.0249788	1	-0.146574	1	0.17876	1	1	0.0818001	1	0.0158042	1	0.0562113	0.0512718	0.0856072	FALSE
Rsbn1l	0.0747065	1	-0.12782	1	-0.000757508	1	0.103455	0.126967	0.037214	1	0.0660152	1	0.0896321	1	-0.00138041	1	0.0570463	1	-0.0249456	1	-0.153528	1	0.0545948	1	0.290664	1	0.195842	1	0.108256	1	0.941405	0.106702	1	-0.00993441	1	0.0570309	0.0512663	0.0266666	FALSE
S100a13	-0.0703383	1	-0.310769	1.20765e-05	0.0154154	1	0.106037	1	0.147452	1	0.0531358	1	0.221065	9.62231e-06	0.190357	0.000222194	-0.125647	1	0.140467	1	0.189705	1	-0.11766	1	0.304485	1	-0.028892	1	0.0541464	1	0.0103732	0.140343	2.09798e-05	0.0375705	1	-0.0241219	0.0512639	-0.120219	FALSE
Lrp10	0.0330034	1	0.00821367	1	0.00501645	1	0.0278429	1	0.0175192	1	0.0363464	1	0.0827874	1	0.0301138	1	0.0227367	1	0.256047	1	0.201735	1	0.11515	1	0.092621	1	-0.00384884	1	-0.156507	1	1	0.0984603	1	0.0507465	1	0.00454846	0.0512517	0.0965637	FALSE
Apool	-0.0626763	1	-0.0258667	1	-0.0311086	1	0.0154266	1	0.0597109	1	-0.0271797	1	0.0325434	1	0.0792356	1	0.0689995	1	0.160757	1	0.229841	1	-0.0150687	1	0.200693	1	0.144109	1	-0.0606819	1	1	0.0693487	1	0.0974059	1	-0.0130079	0.0512489	0.0877206	FALSE
Ifi211	0.107019	1	-0.0216771	1	0.120402	1	0.00521175	1	-0.0380161	1	0.107283	1	0.0118054	1	0.0491021	1	0.106891	1	-0.011291	1	0.0468368	1	0.100711	1	0.101223	1	-0.0374861	1	0.120564	1	1	0.0427936	1	-0.00024807	1	0.11117	0.0512385	0.0491032	FALSE
Mndal	-0.0393682	1	-0.0155566	1	0.0740046	1	0.0331776	1	0.0761877	1	0.021874	1	0.035679	1	0.175854	0.326343	0.142817	1	-0.106084	1	-0.121923	1	-0.013296	1	0.098019	1	0.283971	1	0.122933	1	1	0.00428464	0.994152	0.0797066	1	0.0696667	0.0512193	0.0908425	FALSE
Gid8	0.00958071	1	0.0325389	1	-0.0371552	1	0.0429958	1	0.0604637	1	0.0612746	1	0.0762813	1	0.0614261	1	0.0751063	1	0.00973616	1	0.013527	1	-0.00970158	1	0.147478	1	0.0802097	1	0.143208	1	1	0.0572144	1	0.0496331	1	0.0465464	0.0511313	0.0757045	FALSE
Ahctf1	0.0218603	1	0.0666617	1	0.142304	1	-0.0017252	1	-0.0362671	1	0.0717802	1	0.00375038	1	0.0162301	1	0.000428605	1	0.156928	1	0.129353	1	0.0782726	1	0.14942	1	0.00905084	1	-0.0410791	1	1	0.0660466	1	0.0370058	1	0.0503412	0.0511312	0.0757431	FALSE
Gpbp1l1	0.0789348	1	0.0568779	1	0.0405407	1	-0.000247671	1	0.0085713	1	0.0397951	1	0.0253051	1	0.0121535	1	0.0487697	1	0.145895	1	-0.0128749	1	-0.108608	1	0.168434	1	0.236419	1	0.0269336	1	1	0.0836642	1	0.0602293	1	0.0094862	0.0511266	-0.00921624	FALSE
Pik3r1	0.0514475	1	-0.0143382	1	0.00628944	1	0.0893722	0.00897082	0.0779022	1	0.0121139	1	0.0863498	0.193765	0.0118279	1	0.0230205	1	0.0994512	1	0.0422739	1	0.0371693	1	0.163704	1	0.0366844	1	0.0410397	1	0.240354	0.0980649	1	0.03087	1	0.0239266	0.0509538	0.0696003	FALSE
2610507B11Rik	0.112188	1	0.124097	0.0159144	0.058804	1	0.0908053	0.00238886	0.0763044	1	0.0456627	1	0.0997429	0.345466	0.0765879	1	0.0832312	1	0.0100848	1	0.0897133	1	-0.0612715	1	0.0962183	1	-0.0572076	1	-0.0809393	1	0.16408	0.0818078	0.601404	0.0618991	1	0.00909741	0.0509348	0.0836803	FALSE
Anapc5	0.227867	0.126406	0.0941968	1	0.125754	1	0.0467585	1	0.0173518	1	-0.061656	1	0.0986907	1	0.0299615	1	0.0343358	1	-0.0739759	1	0.125603	1	0.0248411	1	0.0556942	1	0.0551389	1	-0.0367642	1	0.940979	0.0710069	1	0.0644504	1	0.0173021	0.0509198	0.0538938	FALSE
Rnf149	0.103722	1	-0.0107353	1	-0.0252864	1	0.0801136	1	0.0257598	1	-0.00354089	1	0.125975	0.0637592	0.0469284	1	0.0392247	1	0.0954979	1	-0.0422468	1	0.0965887	1	0.275336	1	0.0334065	1	-0.0774733	1	0.854976	0.136129	1	0.0106225	1	0.00590255	0.0508846	0.124177	FALSE
Zmpste24	0.0863446	1	0.128797	0.458612	0.0665723	1	0.0283087	1	0.0848647	1	-0.026527	1	0.0789117	1	0.0298467	1	0.0240161	1	0.0659005	1	0.0098321	1	0.117128	1	0.0419074	1	0.0510554	1	-0.0241529	1	1	0.0602746	0.998739	0.0608792	1	0.0314072	0.0508537	0.0618422	FALSE
Vcl	0.158709	1	0.0301025	1	0.00967524	1	0.111468	0.010726	0.117471	1	0.0666995	1	0.0965726	0.14968	-0.0191228	1	-0.126531	0.0555745	0.165789	1	0.0812829	1	-0.006237	1	-0.0535652	1	-0.083635	1	0.214107	1	0.231107	0.0957947	1	0.0252197	0.833391	0.0315427	0.0508524	0.121662	FALSE
Ergic1	-0.0443938	1	0.04231	1	-0.0486282	1	0.0146179	1	0.000441146	1	0.0313326	1	-0.00253498	1	-0.0174678	1	-0.0650492	0.33616	0.112721	1	0.151864	1	0.196347	1	0.108479	1	0.150495	1	0.132022	1	1	0.0377779	1	0.0655284	0.994762	0.0492049	0.0508371	0.0601894	FALSE
Lgals8	0.0461397	1	0.00419895	1	0.0502216	1	0.0458137	1	0.0058816	1	0.121625	1	0.113709	1	0.011593	1	-0.0108316	1	0.11014	1	0.0667945	1	0.0926626	1	0.112613	1	-0.0734943	1	0.065343	1	1	0.0856829	1	0.00299475	1	0.0638041	0.0508272	0.0519655	FALSE
Ctnnal1	0.182773	0.00433246	0.047724	1	0.0398464	1	0.0213155	1	0.00619612	1	0.0184906	1	0.0448796	1	-0.024884	1	0.0295743	1	0.102495	1	-0.0375958	1	0.0543882	1	0.125326	1	0.0209174	1	0.130236	1	0.366687	0.0953578	1	0.00247153	1	0.0545071	0.0507788	-0.0114764	FALSE
Clstn1	0.0180735	1	0.078476	1	0.0259582	1	0.0573018	1	-0.0214291	1	0.0101738	1	0.0649956	1	0.00364826	1	-0.00256489	1	0.23447	1	0.118972	1	0.0906503	1	-0.00243063	1	0.0493989	1	0.0357305	1	1	0.0744821	1	0.0458132	1	0.0319896	0.0507617	0.0323845	FALSE
Kat7	0.084103	1	0.0423052	1	0.0251242	1	0.0983524	0.000502884	0.0715426	1	0.0264546	1	0.045531	1	0.0247855	1	-0.0010714	1	0.125188	1	0.00381766	1	0.160914	1	0.0313218	1	-0.0889819	1	0.111316	1	0.125276	0.0768992	1	0.0106938	1	0.0645474	0.0507135	0.0616859	FALSE
Lpgat1	0.101359	1	0.0012767	1	0.0216542	1	0.00808539	1	0.0505405	1	-0.0174351	1	0.0296618	1	0.00455163	1	0.0298902	1	0.266256	1	0.160901	1	0.0493699	1	0.0058344	1	-0.0245083	1	0.0730215	1	1	0.0822394	1	0.0385523	1	0.0313001	0.0506973	0.0774244	FALSE
Lsm6	-0.0284865	1	-0.065813	1	0.0996289	1	-0.008186	1	0.0617293	1	0.198722	0.537751	0.0615272	1	0.074498	1	0.051367	1	0.17227	1	-0.0384432	1	0.178942	1	-0.0718448	1	0.0186453	1	0.0554959	1	1	0.0250559	1	0.0101233	0.999542	0.116831	0.0506701	0.0505269	FALSE
Tbl1xr1	0.0899462	1	0.0511706	1	0.0460473	1	0.0778019	0.00616685	0.0455156	1	0.00615413	1	0.0547529	1	0.00701922	1	0.0249161	1	0.110747	1	0.0934884	1	-0.0102358	1	0.0369857	1	-0.00394081	1	0.12711	1	0.425093	0.0740467	1	0.0386506	1	0.0387983	0.0504985	0.0341383	FALSE
Sertad2	0.0674671	1	0.0520837	1	0.121622	1	0.0651134	1	0.0849891	1	0.0456361	1	0.064905	1	0.0393323	1	0.105853	1	-0.0226283	1	0.0206727	1	0.184093	1	0.0440595	1	-0.0448375	1	-0.0722702	1	1	0.0437834	1	0.0304481	1	0.0769869	0.0504061	0.0585248	FALSE
Phip	0.103313	1	0.0814385	1	0.0871673	1	0.0850624	1	0.0554644	1	-0.0380286	1	0.0115156	1	-0.00648677	1	0.0177864	1	0.138191	1	0.121265	1	-0.015747	1	0.0217902	1	-0.0736667	1	0.16693	1	1	0.0719743	1	0.0356029	1	0.0436216	0.0503996	0.0662076	FALSE
Hnrnpul1	0.145513	0.24086	0.0534651	1	0.0532551	1	0.0797792	0.0156813	0.0516485	1	-0.00421572	1	0.0226841	1	0.000655806	1	0.0386947	1	0.0541468	1	0.00802724	1	-0.0460493	1	0.0783192	1	-0.0199775	1	0.239865	1	0.345369	0.0760885	1	0.0187638	1	0.05631	0.0503874	0.0277982	FALSE
Dubr	0.0712278	1	0.00867553	1	0.0314963	1	0.0464688	1	0.0569367	1	0.0200088	1	0.0179798	1	0.0618369	1	0.0556559	1	0.0900232	1	0.108267	1	0.0245381	1	0.103722	1	0.116809	1	-0.0578671	1	1	0.0658843	1	0.0705049	1	0.0147664	0.0503852	0.0390204	FALSE
Golm1	0.063229	1	0.0751782	1	0.0250565	1	0.0387883	1	0.00988005	1	0.0212508	1	0.0439489	1	0.00828053	1	0.013285	1	0.130024	1	0.0584013	1	0.0547833	1	0.0979754	1	-0.0823861	1	0.197389	1	1	0.074793	1	0.0138708	1	0.062353	0.0503389	0.0387029	FALSE
Slbp	-0.00270812	1	0.0325841	1	0.0111449	1	-0.00602944	1	0.00510784	1	0.000881757	1	-0.0220517	1	0.0347701	1	0.113363	1	-0.108915	1	0.175134	1	0.164241	1	0.223456	1	0.0344947	1	0.0991396	1	1	0.0167504	1	0.0564181	1	0.0777539	0.0503075	0.0446415	FALSE
Mbd1	0.0357653	1	0.00419584	1	0.000478604	1	0.00909311	1	0.0473688	1	0.0642066	1	0.0233344	1	0.0454232	1	0.0655854	1	0.0566106	1	0.0598534	1	0.0557606	1	-0.0237199	1	0.120195	1	0.190332	1	1	0.0202167	1	0.0554072	1	0.0752726	0.0502988	0.0226336	FALSE
Nucb2	0.0333175	1	-0.0236343	1	0.000960551	1	0.0610721	0.617901	0.0153684	1	0.0479805	1	0.158641	0.000254298	-0.00686237	1	0.0176245	1	0.256581	1	0.0452615	1	0.215	1	0.139213	1	-0.0699877	1	-0.136656	1	0.0636813	0.129765	1	-0.0079709	1	0.0289819	0.0502586	0.059655	FALSE
Mettl6	0.0300727	1	0.0209971	1	0.0391263	1	0.0493815	1	0.0448458	1	0.0576976	1	0.0346268	1	0.0452201	1	0.0432502	1	0.0387552	1	0.0662525	1	-0.0232983	1	0.0452506	1	0.0877552	1	0.173774	1	1	0.0396173	1	0.0530141	1	0.05811	0.0502472	0.0308703	FALSE
Thap3	0.197727	0.0215282	0.0551349	1	0.111415	1	0.0576937	1	0.0826208	1	0.0543609	1	0.0399097	1	0.0565513	1	0.0566462	1	0.0704116	1	-0.0598878	1	-0.0237333	1	0.12277	1	-0.100343	1	0.0316825	1	0.660375	0.0977024	1	0.0068152	1	0.0460744	0.0501973	0.0945237	FALSE
Anapc1	0.0518555	1	0.0517359	1	0.0275544	1	0.0509003	1	0.021379	1	0.0366637	1	0.0170587	1	-0.00875754	1	0.0813695	1	-0.0125623	1	0.0538634	1	0.0192064	1	0.130063	1	0.0796398	1	0.15265	1	1	0.0474631	1	0.0395721	1	0.0634888	0.0501747	0.0533227	FALSE
Rnf167	0.0605407	1	0.0377873	1	0.0479845	1	0.0323618	1	-0.00541088	1	-0.00691132	1	0.0470885	1	0.0209026	1	0.0289014	1	0.154469	1	0.108417	1	0.0992217	1	0.0731379	1	-0.0211364	1	0.074347	1	1	0.0735195	1	0.028112	1	0.0487086	0.0501134	0.0206003	FALSE
Msrb1	0.136859	1	0.0416252	1	-0.000114073	1	0.045754	1	0.0423886	1	-0.0149801	1	0.0509247	1	0.0252542	1	-0.00141684	1	0.127057	1	0.191391	1	0.022026	1	0.0710949	1	-0.0304485	1	0.0440146	1	1	0.0863379	1	0.0540421	1	0.00990591	0.0500953	0.0539112	FALSE
Arid1a	0.110235	1	0.119606	0.0289642	0.0605577	1	0.0204657	1	0.0378368	1	0.0647789	1	0.0819973	1	0.0304259	1	0.0804777	1	-0.0902483	1	0.148618	1	-0.0335834	1	0.0979246	1	0.0169988	1	0.0053111	1	1	0.0440748	0.71755	0.0706972	1	0.0355084	0.0500935	0.0571482	FALSE
Snrnp27	0.117876	1	-0.0242563	1	0.0886081	1	0.0467847	1	0.00503647	1	0.0612767	1	0.000499098	1	-0.0139499	1	0.098111	1	0.163465	1	0.124084	1	-0.0473126	1	-0.0352689	1	0.024584	1	0.140892	1	1	0.0586711	1	0.0230996	1	0.0683151	0.0500286	0.0244252	FALSE
Rabep1	0.0599438	1	0.00365119	1	0.017925	1	0.108829	0.000582195	0.0566808	1	0.0491389	1	0.079587	1	-0.00284283	1	0.0604666	1	0.025099	1	0.0681864	1	-0.0759653	1	0.0544408	1	0.0334693	1	0.211608	1	0.135847	0.0655799	1	0.031829	1	0.0526347	0.0500145	0.0838031	FALSE
Map3k1	0.0278479	1	0.0377487	1	0.0800543	1	0.0434397	1	0.0520206	1	0.0896121	1	0.0681066	0.776944	0.0587786	1	0.1217	1	-0.0807465	1	-0.00201652	1	0.0261586	1	0.116484	1	0.00432053	1	0.106424	1	0.999993	0.0350263	1	0.0301704	1	0.0847897	0.0499955	0.0217655	FALSE
Ado	0.0267287	1	0.012265	1	0.0148751	1	0.0483741	1	0.0532806	1	0.0215892	1	0.0789893	1	0.0420413	1	0.010123	1	0.190094	1	0.0751541	1	0.0473135	1	0.102821	1	-0.0124808	1	0.0387478	1	1	0.0894014	1	0.034052	1	0.0265297	0.0499944	0.091324	FALSE
Vangl1	0.0486865	1	0.0850351	0.405279	0.0850246	1	0.0356543	1	0.0305406	1	0.0172862	1	0.0322368	1	0.0492874	1	0.0785745	1	0.0490327	1	0.0668217	1	0.0653421	1	0.068185	1	-0.0247082	1	0.0626576	1	1	0.0467591	0.99762	0.0413953	1	0.061777	0.0499771	0.0310106	FALSE
Hs2st1	0.0769322	1	0.0567166	1	0.0508664	1	0.00850777	1	0.0476997	1	0.0478617	1	-0.0138457	1	0.0037835	1	0.0530763	1	0.0687024	1	0.148077	1	-0.0376124	1	0.0487929	1	-0.00149332	1	0.19155	1	1	0.0378179	1	0.0509568	1	0.0611484	0.0499744	0.0127276	FALSE
Atf7ip	0.0579005	1	0.0401313	1	0.0347702	1	0.0401452	1	0.0735179	1	0.0801775	1	0.0381916	1	0.038594	1	0.0967848	1	0.0463771	1	0.0992145	1	0.0332311	1	0.0541351	1	0.0529614	1	-0.0368947	1	1	0.0473499	1	0.0608838	1	0.0416138	0.0499492	0.078368	FALSE
Zfp644	0.0486096	1	0.092875	1	0.0278227	1	0.0184238	1	0.00561859	1	-0.0457717	1	0.0353515	1	0.0537934	1	0.0322892	1	0.0237301	1	0.195593	1	-0.0125312	1	0.181444	1	0.116516	1	-0.024548	1	1	0.0615117	1	0.0928792	1	-0.00454782	0.0499477	0.0445464	FALSE
Mta3	0.103665	1	0.14202	0.000133859	0.0684631	1	0.0184188	1	0.0556941	1	0.0277365	1	0.0114712	1	0.0630908	1	-0.0022705	1	0.085162	1	0.0598949	1	0.138203	1	-0.0757347	1	-0.0456655	1	0.0989177	1	1	0.0285964	0.0577684	0.0550069	1	0.0662099	0.0499377	0.0651605	FALSE
Ankrd11	0.0726655	1	0.00685834	1	0.11654	1	0.0982416	1	0.0892131	1	0.0567996	1	0.0568283	1	0.0607552	1	0.167126	1	-0.0815838	1	-0.103202	1	0.147485	1	-0.0770772	1	-0.0650303	1	0.203023	1	1	0.0138149	1	-0.00228109	1	0.138195	0.0499095	0.0455611	FALSE
Mum1	0.0816124	1	0.0444493	1	0.0391871	1	0.0732467	0.209596	0.0198606	1	0.0346886	1	0.0820681	0.439454	0.0301558	1	0.0376982	1	0.141384	1	0.0989133	1	0.0360185	1	0.0376568	1	0.0101238	1	-0.0187587	1	0.906028	0.0831936	1	0.0407006	1	0.0257668	0.049887	0.0736535	FALSE
Gcnt2	0.0064085	1	-0.000291879	1	0.0124552	1	0.0189661	1	0.0500301	1	0.113868	1	0.10374	0.028267	0.048879	1	0.0277802	1	0.0136253	1	0.131292	1	0.134166	1	0.0757999	1	-0.0109038	1	0.0223388	1	0.712916	0.0437079	1	0.043801	1	0.0621216	0.0498768	0.034712	FALSE
Cic	0.100223	1	0.0738636	1	0.0556141	1	0.0606462	1	0.0334104	1	0.0306063	1	0.0439795	1	0.0527613	1	0.0330369	1	0.115162	1	0.108732	1	0.00843158	1	0.0530801	1	0.00111375	1	-0.0232795	1	1	0.0746182	1	0.0539761	1	0.0208819	0.0498254	0.0267554	FALSE
Mrpl40	0.0768513	1	-0.00195359	1	0.00945226	1	-0.0132507	1	-0.046762	1	0.026579	1	-0.0024013	1	0.0134024	1	0.00871456	1	0.228883	1	0.129688	1	0.116595	1	0.00576162	1	0.0926456	1	0.102673	1	1	0.0591687	1	0.037404	1	0.0528028	0.0497919	0.089303	FALSE
Hist1h2ap	0.0888372	1	-0.043361	1	0.0554613	1	0.142367	1	-0.0849051	1	0.0182211	1	0.08049	1	-0.061331	1	0.240303	1	0.268131	1	-0.0225265	1	-0.0179549	1	0.227773	1	-0.127924	1	-0.016836	1	1	0.16152	1	-0.0680095	1	0.0558389	0.049783	-0.114689	FALSE
Phyh	0.0722856	1	0.011495	1	0.0011096	1	0.0248254	1	-0.0163248	1	0.0529566	1	0.0884357	1	-0.00271895	1	0.0298187	1	0.0789544	1	0.116223	1	0.0819026	1	0.104048	1	0.0470421	1	0.0563515	1	1	0.0737099	1	0.0311433	1	0.0444278	0.0497603	0.100106	FALSE
Dennd1b	0.0529532	1	0.0121635	1	0.0198302	1	0.0378769	1	0.0588225	1	-0.0267009	1	0.0748542	1	0.0568806	1	0.0124649	1	0.0292172	1	0.194537	1	0.0803527	1	0.0634163	1	-0.0083259	1	0.0877448	1	1	0.0516636	1	0.0628156	1	0.0347384	0.0497392	0.0372461	FALSE
Msn	-0.0338092	1	0.0659774	1	0.0978222	1	-0.0900404	1	-0.0541895	1	-0.0636417	1	0.0708032	1	0.0297956	1	-0.0735141	1	0.235822	1	0.244434	1	-0.152968	1	0.0209232	1	0.231284	1	0.216555	1	1	0.0407399	1	0.10346	1	0.00485071	0.0496836	0.0432743	FALSE
Virma	0.0837641	1	0.0596733	1	0.00733456	1	0.0623638	1	0.0416915	1	0.0448341	1	0.117721	1	0.0520029	1	-0.00912147	1	0.161379	1	0.07833	1	0.0528681	1	0.0947688	1	-0.0779878	1	-0.0252403	1	1	0.103999	1	0.030742	1	0.014135	0.0496254	0.0802121	FALSE
Rbm39	-0.0586579	1	0.105424	1	0.0464322	1	-0.0669167	1	0.029057	1	0.0657859	1	-0.0666977	1	0.0417125	1	0.128634	1	0.0297298	1	-0.058926	1	0.14516	1	0.103206	1	0.103695	1	0.19663	1	1	-0.0118673	1	0.0441924	1	0.116528	0.0496179	-0.0934204	FALSE
Rasa2	-0.00172067	1	-0.0100624	1	0.0254991	1	0.018923	1	-0.0289864	1	-0.000258542	1	0.0349055	1	0.0398353	1	0.0312343	1	0.223652	1	0.0940025	1	0.0261	1	0.0992823	1	-0.0146613	1	0.206426	1	1	0.0750084	1	0.0160255	1	0.0578001	0.0496113	0.0166435	FALSE
Sesn3	0.152786	0.00864051	0.107199	0.00015838	0.072994	1	0.144052	9.14092e-08	0.135726	0.321045	-0.0419516	1	0.0515497	0.0335398	0.0329587	1	-0.00192278	1	0.0923658	1	0.0715012	1	0.0112527	1	0.0220484	1	-0.0503071	1	-0.0561475	1	4.60613e-07	0.0925604	0.0314705	0.0594156	1	-0.00315502	0.049607	0.063606	FALSE
Fbxo30	-0.00514171	1	0.0409071	1	0.0546026	1	-0.0313116	1	-0.0274941	1	-0.00859485	1	-0.0200627	1	0.0213965	1	0.105033	1	0.0722497	1	0.0595138	1	0.0308722	1	0.0416346	1	0.205791	1	0.204084	1	1	0.0114736	1	0.0600229	1	0.0771994	0.0495653	-0.0102334	FALSE
Atpaf1	0.071128	1	0.00268133	1	0.00389877	1	0.00574532	1	-0.0134879	1	0.00661975	1	0.0180304	1	0.00538565	1	0.0385645	1	0.214166	1	0.0216264	1	0.162498	1	0.0248787	1	0.0530551	1	0.128001	1	1	0.0667898	1	0.0138521	1	0.0679163	0.0495194	0.0530439	FALSE
Zc3h7b	0.0302812	1	0.0341664	1	0.00874482	1	0.019941	1	0.0502738	1	0.0422633	1	0.0179306	1	0.015866	1	0.0213695	1	0.0754396	1	0.151304	1	0.044552	1	0.0882581	1	0.0625524	1	0.0796717	1	1	0.0463701	1	0.0628324	1	0.0393203	0.0495076	0.025781	FALSE
Yipf3	0.0351688	1	-0.00718079	1	-0.00346314	1	0.0545251	1	0.0410986	1	-0.0350518	1	0.0566454	1	0.0115154	1	0.0032267	1	0.0661313	1	0.191607	1	0.0469705	1	0.0969285	1	0.0239362	1	0.160251	1	1	0.0618798	1	0.0521953	1	0.0343866	0.0494872	0.0479132	FALSE
Hivep2	0.0503497	1	0.000414936	1	-0.0116985	1	0.0384571	1	0.00725829	1	0.0567324	1	0.0349714	1	0.032384	1	0.0694074	1	0.0026767	1	0.134423	1	0.0985597	1	0.0307828	1	0.026268	1	0.170673	1	1	0.0314475	1	0.0401497	1	0.0767348	0.049444	-0.018986	FALSE
Tacc1	-0.0242457	1	-0.0282609	1	0.024228	1	0.0263958	1	0.0227369	1	0.134186	1	0.0826441	1	0.0287338	1	0.0351332	1	0.2159	1	0.209233	1	0.0851428	1	0.0326873	1	-0.093458	1	-0.0104892	1	1	0.0666762	1	0.0277969	1	0.0536401	0.0493711	0.0601919	FALSE
Rbm22	0.108883	1	-0.00746557	1	0.0602925	1	0.0856879	0.0846851	0.07229	1	0.0937521	1	0.0397144	1	0.0739718	1	0.0782257	1	0.0119206	1	-0.00456547	1	0.0408661	1	-0.0178858	1	0.0912975	1	0.0134087	1	0.895305	0.045664	1	0.0451057	1	0.057309	0.0493596	0.0569471	FALSE
Itpr3	0.0634133	1	0.0955648	0.0035678	0.0607427	1	0.0438517	1	0.0459627	1	0.0264731	1	0.0770831	1	0.0145518	1	0.00213915	1	0.0497395	1	0.0980566	1	0.0702432	1	0.0297262	1	0.0319228	1	0.0308697	1	1	0.0527628	0.336752	0.0572117	1	0.0380936	0.049356	0.0221084	FALSE
Mrpl23	-0.00477516	1	-0.0775942	1	0.0781015	1	0.0233618	1	0.0057082	1	0.132659	1	0.0454439	1	0.042279	1	0.0520552	1	0.173365	1	0.133887	1	0.035546	1	0.0836664	1	-0.102352	1	0.118132	1	1	0.0642123	1	0.000385581	1	0.0832988	0.0492989	-0.0137128	FALSE
Spast	-0.0225189	1	0.131167	0.000280146	0.020507	1	0.0248016	1	0.0637396	1	0.0825237	1	0.0420245	1	0.0667175	1	-0.000479744	1	0.0858481	1	0.187935	1	0.0296409	1	0.00242627	1	0.106975	1	-0.0827515	1	1	0.0265163	0.0897699	0.111307	1	0.00988807	0.0492371	0.037738	FALSE
Bzw1	0.123861	1	-0.0383546	1	0.0501241	1	0.0256107	1	-0.0239822	1	0.0260639	1	0.0577518	1	-0.00771979	1	-0.0552433	1	0.0893463	1	0.249958	1	0.105536	1	-0.0183816	1	0.0947918	1	0.0590954	1	1	0.0556376	1	0.0549387	1	0.0371151	0.0492305	0.123349	FALSE
Ubxn7	0.0216771	1	0.0789329	0.176538	0.00383798	1	0.027989	1	0.0176101	1	0.0710073	1	0.0364769	1	0.0531025	1	0.0412508	1	0.0598923	1	0.0802265	1	0.0239846	1	0.068786	1	-0.00826572	1	0.161163	1	1	0.0429643	0.968159	0.0443213	1	0.0602488	0.0491781	0.0270364	FALSE
2700081O15Rik	0.00536554	1	0.0734963	0.236285	0.0470168	1	0.00649938	1	0.0192611	1	0.0553899	1	0.0215725	1	0.070795	1	0.0937383	1	0.0122033	1	0.157877	1	-0.0182464	1	-0.00202441	1	-0.0123349	1	0.206996	1	1	0.00872326	0.983993	0.0618189	1	0.0769789	0.0491737	0.0330809	FALSE
Slc7a5	0.0524208	1	0.0553452	1	0.124046	1	0.0316836	1	0.0522641	1	0.0811663	1	0.00628435	1	0.0336015	1	0.0244395	1	0.170658	1	0.0822196	1	0.177226	1	0.0338705	1	-0.0982564	1	-0.0903787	1	1	0.0589835	1	0.0250348	1	0.0632998	0.049106	0.0364239	FALSE
Lnpep	0.061258	1	0.174436	0.00176023	0.117811	1	0.0826831	0.0220347	0.0758147	1	0.0712162	1	0.08576	1	0.080717	1	0.0788401	1	0.128072	1	0.0770002	1	-0.044027	1	0.0372973	1	-0.123514	1	-0.168819	1	0.664901	0.0790141	0.241843	0.0568909	1	0.0110043	0.0489697	0.092557	FALSE
Fnip1	-0.0524222	1	0.0126905	1	0.0237153	1	0.00929625	1	0.0344965	1	0.103539	1	-0.00406259	1	0.0628323	1	0.0523453	1	0.0130535	1	0.0233017	1	0.0447326	1	0.109374	1	0.117687	1	0.183863	1	1	0.0150479	1	0.0502015	1	0.081639	0.0489628	-0.0147465	FALSE
Med21	0.0281379	1	0.108805	1	0.0517484	1	0.0423737	1	0.10676	1	0.0163327	1	0.101512	1	0.147951	7.84978e-06	0.102526	1	-0.00743143	1	-0.057278	1	-0.0726966	1	0.0353044	1	0.112701	1	0.0175886	1	1	0.0399793	0.00901267	0.0837879	1	0.0230997	0.0489557	0.126643	FALSE
Hint2	0.13365	1	-0.155648	0.247053	0.0777793	1	0.116754	1.12239e-06	0.0739102	1	0.0671824	1	0.163362	6.1185e-08	-0.000830134	1	0.0849036	1	0.0736657	1	-0.0974172	1	-0.064994	1	-0.0430656	1	0.109692	1	0.195341	1	2.76722e-09	0.0888733	0.98582	-0.0140585	1	0.0720425	0.0489525	0.0762315	FALSE
Actn4	0.193845	1	0.0349768	1	0.0498451	1	0.0856641	1	0.0376272	1	0.0235636	1	0.0758707	1	0.048174	1	0.0709899	1	0.0751463	1	0.156717	1	0.14862	1	0.0211647	1	-0.0939282	1	-0.194081	1	1	0.0903382	1	0.0367133	1	0.0197875	0.0489464	0.0878148	FALSE
Qdpr	0.0705361	1	-0.0077272	1	0.062223	1	0.0196602	1	-0.0250161	1	0.0347298	1	0.0667383	1	0.020254	1	0.0772008	1	-0.0348438	1	0.00208898	1	0.149672	1	0.203308	1	0.0760857	1	0.0191938	1	1	0.0650797	1	0.0131371	1	0.0686039	0.0489402	0.0292109	FALSE
Spcs3	0.00512324	1	0.00223864	1	0.00396898	1	-0.0161158	1	0.0159254	1	0.0362509	1	0.0297208	1	0.00983155	1	-0.0262234	1	0.241494	1	-0.0244207	1	0.097683	1	0.16612	1	0.0623318	1	0.130057	1	1	0.0852684	1	0.0131814	1	0.0483472	0.0489323	0.00106329	FALSE
Upf2	0.0743492	1	0.0636855	1	0.0381789	1	-0.0183276	1	-0.0155643	1	0.0265465	1	-0.0152806	1	-0.00679988	1	0.0444853	1	-0.0472634	1	0.132113	1	0.119155	1	0.115434	1	0.0506914	1	0.172481	1	1	0.0217824	1	0.0448252	1	0.0801693	0.0489256	-0.0512608	FALSE
Mtpn	0.00254544	1	0.011347	1	-0.0990715	1	0.0437462	1	0.0678245	1	0.117087	1	0.082702	1	0.0271982	1	0.0268315	1	0.164647	1	0.234001	1	-0.135005	1	0.104939	1	0.163973	1	-0.0793979	1	1	0.079716	1	0.100869	1	-0.0339113	0.0488911	0.149814	FALSE
Atf7	0.0368846	1	0.0177125	1	0.0207142	1	0.0526122	1	0.0469391	1	-0.00862114	1	0.0571406	1	0.0525576	1	0.0364402	1	-0.0141467	1	0.0359079	1	0.0332642	1	0.174759	1	0.0300622	1	0.161104	1	1	0.06145	1	0.0366359	1	0.0485802	0.0488887	0.0262159	FALSE
Akap11	0.0175195	1	-0.0091803	1	0.0292277	1	0.049093	1	0.0471611	1	0.0678382	1	0.058926	1	0.012609	1	0.0159114	1	0.0749438	1	0.10189	1	0.129987	1	0.0271746	1	-0.0886487	1	0.19874	1	1	0.0455314	1	0.0127663	1	0.0883409	0.0488795	0.0482197	FALSE
Scd1	0.0757458	1	0.0260892	1	0.0160072	1	0.0778673	3.77753e-06	0.0603682	1	-0.0208957	1	0.0429519	1	0.0285675	1	0.0185963	1	0.0773337	1	0.0944867	1	0.133774	1	0.0504734	1	0.0620496	1	-0.0106937	1	0.00539715	0.0648744	1	0.0543122	1	0.0273576	0.0488481	0.0183575	FALSE
Utrn	0.100769	1	0.0480551	1	0.0373367	1	0.159616	4.9277e-07	0.0863463	1	0.0231981	1	0.0919915	1	0.00526747	1	0.042173	1	0.138574	1	-0.0234825	1	-0.024573	1	0.139095	1	-0.00758268	1	-0.0844492	1	0.00122465	0.126009	1	0.0217207	1	-0.00126289	0.0488223	0.0469793	FALSE
Hells	0.19316	1	-0.034436	1	0.0684816	1	0.0754778	1	0.0645996	1	0.121728	1	-0.0296444	1	-0.0628297	1	0.174352	1	0.0530263	1	0.0103227	1	0.0477117	1	0.0204185	1	-0.160523	1	0.190221	1	1	0.0624876	1	-0.0365733	1	0.120499	0.0488044	-0.0334296	FALSE
Dbn1	0.0312942	1	0.0758847	0.0341051	0.00719099	1	0.0691626	1	0.135473	0.0436066	0.0188146	1	0.064854	1	0.117429	1.56421e-08	0.0622286	1	-0.0410017	1	0.086339	1	0.0607148	1	-0.0201407	1	0.0457686	1	0.0177879	1	1	0.0208337	4.12808e-07	0.0921789	1	0.0333474	0.0487866	0.0142815	FALSE
Gbp2b	-0.0676501	1	-0.0824218	1	0.208359	1	0.0366189	1	-0.00493508	1	0.251334	1	-0.0521916	1	-0.0623519	1	0.1091	1	-0.165386	1	0.158904	1	0.180857	1	0.105286	1	0.13967	1	-0.024856	1	1	-0.0286644	1	0.0297731	1	0.144959	0.0486892	0.0977822	FALSE
Zc3h13	0.0619073	1	0.00614285	1	-0.0115714	1	0.0533399	1	-0.0423981	1	0.0591489	1	0.0572249	1	-0.00303556	1	-0.00934934	1	0.069091	1	0.0837676	1	0.164197	1	0.11086	1	0.0392558	1	0.0913376	1	1	0.0704846	1	0.0167465	1	0.0587526	0.0486612	0.0704062	FALSE
Stk3	0.0538147	1	0.0493594	1	0.0345889	1	0.100064	2.09766e-05	0.0971559	1	0.043369	1	0.0555186	1	0.025804	1	0.00207732	1	0.152696	1	-0.0198153	1	0.00094671	1	0.0484372	1	0.136985	1	-0.0511706	1	0.0176027	0.0821062	1	0.0578977	1	0.00596228	0.0486554	0.0669913	FALSE
Ncoa5	0.00478049	1	0.0488997	1	0.0415578	1	0.00461861	1	0.0682571	1	0.0406968	1	0.0125474	1	0.0213651	1	0.0430795	1	0.0681375	1	0.0483308	1	-0.0559834	1	0.114606	1	0.104466	1	0.163967	1	1	0.0409381	1	0.0582636	1	0.0466636	0.0486218	0.0327674	FALSE
Ripk1	0.0188204	1	0.0380125	1	0.04842	1	0.0379986	1	0.0841064	1	0.0780732	1	0.111893	0.12973	0.0420377	1	0.0248128	1	0.158575	1	0.165871	1	0.0203384	1	0.071652	1	-0.0176328	1	-0.154028	1	0.94345	0.0797878	1	0.062479	1	0.0035233	0.0485967	0.0699362	FALSE
Diaph2	0.0909728	1	0.105882	0.0771371	0.127421	1	0.00567562	1	0.0593717	1	-0.0427898	1	0.0818584	1	0.0725084	1	0.0194116	1	0.0719465	1	0.222363	1	0.0625547	1	-0.0800826	1	-0.0694911	1	0.000980068	1	1	0.0340741	0.882718	0.0781269	1	0.0335155	0.0485722	0.0444906	FALSE
Nmt2	0.0651027	1	0.121644	0.0564268	0.0136792	1	0.0597732	1	0.0585039	1	0.0333403	1	-0.0424281	1	-0.0730694	1	-0.0189019	1	0.176424	1	0.16035	1	0.160649	1	-0.0825484	1	0.00214205	1	0.0937098	1	1	0.0352647	0.835842	0.0539142	1	0.0564953	0.0485581	0.0450916	FALSE
Nsmce4a	0.106349	1	-0.0155941	1	-0.00801628	1	0.0507674	1	0.0407503	1	0.0783208	1	0.00727443	1	0.00165436	1	0.0900628	1	0.0484408	1	0.0934879	1	-0.0263549	1	0.104852	1	0.0629743	1	0.0931618	1	1	0.0635366	1	0.0366546	1	0.0454348	0.048542	0.131579	FALSE
Fam120b	0.0538124	1	0.0921067	0.00484905	0.0177131	1	0.0405786	1	0.0270661	1	0.0228635	1	0.0429046	1	0.0413006	1	0.0214482	1	0.111258	1	0.109786	1	0.0413902	1	0.0644195	1	-0.00471307	1	0.0460465	1	1	0.0625947	0.384781	0.0531094	1	0.0298923	0.0485321	0.0215218	FALSE
Ifi47	-0.094247	1	-0.185744	1	0.0537337	1	0.0511728	1	0.0569355	1	0.268975	1	0.0537569	1	-0.0138465	1	0.15745	1	-0.200818	1	0.0290762	1	0.123146	1	0.127807	1	0.181644	1	0.117011	1	1	-0.0124657	1	0.0136131	1	0.144063	0.0484035	0.163957	FALSE
Asb3	0.0119507	1	0.00460094	1	-0.026582	1	0.0337377	1	0.019351	1	0.0375848	1	0.0457832	1	0.0260419	1	0.0542662	1	0.0476509	1	0.220023	1	0.0725286	1	0.0864886	1	0.036288	1	0.0563346	1	1	0.0451222	1	0.0612609	1	0.0388265	0.0484032	0.0579076	FALSE
Gm17018	0.0448033	1	-0.03756	1	0.038744	1	0.00461838	1	-0.0255389	1	-0.0161137	1	0.0383686	1	0.0446255	1	0.0186298	1	0.0940402	1	0.281046	1	0.0389714	1	0.0153525	1	0.077687	1	0.108145	1	1	0.0394366	1	0.068052	1	0.0376752	0.0483879	0.0832472	FALSE
Cdc42bpb	0.041506	1	0.0384961	1	0.0600411	1	0.0597507	1	0.0198319	1	0.0929617	1	0.0196395	1	0.0421274	1	0.0136946	1	-0.0686349	1	0.139486	1	-0.00684244	1	0.0707596	1	0.0951664	1	0.107169	1	1	0.0246042	1	0.0670216	1	0.0534048	0.0483435	0.0236664	FALSE
Sh3glb1	0.042397	1	-0.0217437	1	0.0168672	1	0.0990705	0.00262339	0.0478136	1	0.0236144	1	0.0382997	1	0.050157	1	-0.018947	1	0.118768	1	0.0441698	1	0.0408555	1	0.141941	1	0.0516512	1	0.0502312	1	0.292719	0.0880953	1	0.0344096	1	0.0225243	0.0483431	0.121151	FALSE
Isca2	0.0338617	1	0.0321297	1	0.0597792	1	0.0664732	1	0.0930266	1	0.0977167	1	0.0310957	1	0.0600103	1	0.00283734	1	-0.0521172	1	0.00553999	1	-0.0326858	1	0.0750177	1	0.197524	1	0.054676	1	1	0.0308662	1	0.0776462	1	0.0364647	0.0483257	0.0681967	FALSE
Acsl4	0.0478704	1	0.0333612	1	0.0840412	1	-0.0241558	1	0.0359049	1	0.0179036	1	0.0369211	1	0.0113992	1	0.0497937	1	0.069877	1	0.103395	1	0.0281901	1	0.165341	1	-0.0157535	1	0.0804024	1	1	0.0591708	1	0.0336613	1	0.0520662	0.0482994	-0.0351903	FALSE
Cep162	0.113239	0.85477	0.0447656	1	0.114493	1	0.0353213	1	0.0482516	1	0.106338	1	0.0455294	1	0.0204457	1	0.0476597	1	0.0167405	1	-0.0184424	1	0.0671613	1	0.0415583	1	0.00802077	1	0.033349	1	0.999999	0.0504777	1	0.0206082	1	0.0738003	0.0482954	0.0449289	FALSE
Ankrd49	0.106705	1	0.0353456	1	0.0522998	1	0.0804184	0.00234329	0.0206806	1	-0.00805329	1	0.0553873	1	0.0417296	1	0.0431528	1	-0.00589251	1	2.4611e-05	1	0.0372912	1	0.087266	1	0.0493829	1	0.12811	1	0.277605	0.0647768	1	0.0294327	1	0.0505602	0.0482565	0.0467809	FALSE
Mrpl44	0.00709589	1	0.0155896	1	4.94585e-05	1	0.0389814	1	0.0213465	1	0.035049	1	0.0253796	1	0.00042005	1	0.0266076	1	0.104218	1	0.0404741	1	0.0485463	1	0.0924232	1	0.11308	1	0.154574	1	1	0.0536196	1	0.038182	1	0.0529652	0.0482556	0.0764703	FALSE
Sf3b1	0.123149	1	-0.0743326	1	-0.0285815	1	0.0805967	1	-0.0437586	1	-0.0197545	1	0.0998417	1	-0.107397	0.824018	-0.0601207	1	0.170857	1	0.0600968	1	0.0800246	1	0.203001	1	0.00914287	1	0.230122	1	1	0.135489	0.999998	-0.0312497	1	0.0403381	0.0481925	0.121878	FALSE
Myadm	0.0739814	1	0.164997	0.000235784	0.0897274	1	-0.0665654	1	0.099717	1	-0.089261	1	-0.0441118	1	0.109454	0.00113603	-0.00973456	1	0.0461524	1	0.29636	1	0.0811754	1	0.164174	1	0.0283641	1	-0.221759	1	1	0.0347261	0.000774988	0.139778	1	-0.0299703	0.0481781	0.0105868	FALSE
Rnps1	0.103539	1	0.109837	1	0.11427	1	0.00608408	1	-0.0275483	1	0.0752423	1	-0.0384624	1	-0.0664057	1	0.076397	1	-0.137994	1	-0.125227	1	0.211849	1	-0.0590634	1	0.0775918	1	0.40218	1	1	-0.0251793	1	-0.00635043	1	0.175987	0.0481526	-0.0284255	FALSE
Cnot8	0.0328102	1	0.00343068	1	-0.0463781	1	0.0733764	1	0.0341665	1	0.00982697	1	0.0177189	1	-0.012693	1	0.0331311	1	0.14154	1	0.166079	1	0.042739	1	0.0659828	1	0.085187	1	0.0736752	1	1	0.0662857	1	0.0552341	1	0.0225988	0.0480395	0.0368367	FALSE
Ppm1b	0.034454	1	0.115324	0.100763	0.0461521	1	0.0402286	1	3.29032e-06	1	0.0284169	1	0.0545599	1	0.053664	1	0.0845673	1	0.130604	1	-0.0509677	1	0.128916	1	0.118297	1	-0.0168448	1	-0.0468073	1	1	0.0756288	0.916835	0.0202358	1	0.0482491	0.0480379	0.0308358	FALSE
Cyp20a1	0.0522872	1	-0.0280496	1	0.00334051	1	0.0415648	1	0.0264289	1	-0.0248	1	0.115052	0.124107	0.028917	1	-0.0311308	1	0.00573255	1	0.232035	1	0.157713	1	0.120858	1	0.0195416	1	0.000869302	1	0.939194	0.0670987	1	0.0557747	1	0.0211984	0.0480239	0.115028	FALSE
Fam102b	0.0268845	1	0.094669	1	0.113989	1	0.000546672	1	0.0501669	1	0.0751567	1	-0.0105553	1	-0.0227586	1	0.040882	1	0.188068	1	0.00458699	1	0.0758324	1	0.123108	1	-0.0509015	1	0.0101963	1	1	0.0656104	1	0.0151526	1	0.0632113	0.0479914	-0.0102754	FALSE
Ppfia1	0.0647979	1	0.0658153	1	0.0611125	1	0.0523219	1	0.0319421	1	0.0789356	1	0.0666722	1	0.0126044	1	-0.0142338	1	0.0706232	1	-0.0167637	1	0.0316434	1	0.12272	1	-0.0388739	1	0.130541	1	1	0.0754271	1	0.0109448	1	0.0575998	0.0479906	0.0275134	FALSE
Lpcat3	0.0596319	1	0.0428391	1	0.0268002	1	0.0758195	0.0107239	-0.0178625	1	-0.0141614	1	0.0789513	1	-0.000847882	1	0.0378229	1	0.161656	1	0.0787619	1	-0.00183842	1	0.016885	1	0.0673533	1	0.108014	1	0.525421	0.0785887	1	0.0340488	1	0.0313275	0.0479883	0.0829464	FALSE
Uso1	0.0937733	1	0.00522394	1	0.0686013	1	0.0351254	1	0.0561946	1	0.0041445	1	0.111965	1	0.0609122	1	0.0360588	1	0.0509121	1	-0.0232161	1	0.0761287	1	0.14821	1	-0.0577123	1	0.0532859	1	1	0.0879971	1	0.00828049	1	0.0476438	0.0479738	0.0682516	FALSE
Zfp639	0.0206085	1	0.00351466	1	0.076165	1	0.0269182	1	0.103413	1	0.136721	1	0.0722692	1	0.04364	1	0.0748141	1	0.0453205	1	-0.13826	1	0.0406804	1	0.103605	1	0.112173	1	-0.00376759	1	1	0.0537443	1	0.0248962	1	0.0649227	0.0478544	-0.0428264	FALSE
Phlda1	-0.0949914	1	0.00233595	1	-0.0782531	1	0.112347	1	0.139025	1	0.103699	1	0.0791397	1	-0.00561545	1	0.0620366	1	0.342065	1	0.106004	1	0.0324988	1	0.164257	1	-0.0509409	1	-0.196736	1	1	0.120564	1	0.0381617	1	-0.015351	0.0477914	0.0842462	FALSE
Ptgfrn	0.0652893	1	0.12519	6.07867e-05	0.0136988	1	-0.0122603	1	0.0770432	1	-0.0311687	1	-0.0120379	1	0.0397221	1	0.0193695	1	-0.0120116	1	0.149128	1	0.246948	1	0.00914721	1	0.0546228	1	-0.0160303	1	1	0.00762534	0.035283	0.0891411	1	0.0465635	0.0477766	0.0160598	FALSE
Usp25	0.0776719	1	0.0763504	1	0.0891999	1	0.0255281	1	-0.012072	1	0.0351881	1	0.0338104	1	0.028272	1	0.00136253	1	0.0634165	1	0.048988	1	0.0562729	1	0.0264126	1	0.141208	1	0.0248352	1	1	0.0453679	1	0.0565492	1	0.0413717	0.0477629	0.0226647	FALSE
Spcs2	0.169909	1	-0.074278	1	0.0911692	1	0.0650095	1	-0.0223885	1	0.0780989	1	0.108378	1	-0.0220021	1	0.0080936	1	0.290636	1	-0.0356435	1	0.016347	1	0.305014	1	-0.106699	1	-0.155584	1	1	0.187789	1	-0.0522022	1	0.00762499	0.0477374	0.205052	FALSE
Ecd	0.0879087	1	0.0376147	1	0.0464334	1	0.0474538	1	0.078396	1	0.0433531	1	0.0915481	1	-0.00760395	1	-0.0192203	1	0.010253	1	0.175638	1	-0.00752205	1	0.035591	1	0.104479	1	-0.00997667	1	1	0.0545509	1	0.0777046	1	0.0106135	0.047623	0.0904559	FALSE
Plxnd1	0.00648862	1	0.0602604	1	0.0258335	1	0.0160902	1	0.0471949	1	-0.0644894	1	0.0065621	1	0.0588791	1	0.0326611	1	0.210492	1	0.221738	1	0.0498413	1	-0.0297513	1	0.108208	1	-0.0357561	1	1	0.0419763	1	0.0992561	1	0.00161807	0.0476168	0.0274829	FALSE
Thrap3	0.128511	1	0.0629862	1	0.111819	1	0.0746034	1	0.0192002	1	0.0247635	1	0.0660157	1	0.0253119	1	0.0663858	1	0.15314	1	-0.0621038	1	0.0547276	1	0.0613749	1	-0.0702687	1	-0.00230512	1	1	0.0967291	1	-0.00497486	1	0.0510782	0.0476108	0.118828	FALSE
Ppfibp1	0.0950992	1	0.082964	1	0.0352656	1	0.0815107	1	0.0853892	1	0.0371195	1	0.102963	1	0.0259022	1	0.0148356	1	0.119335	1	0.0923581	1	-0.0935164	1	0.195419	1	-0.11887	1	-0.0418804	1	1	0.118865	1	0.0335488	1	-0.00963519	0.0475929	0.0785717	FALSE
Myh10	0.24781	0.000211403	0.12118	0.0108467	0.113153	1	0.00855798	1	-0.000941685	1	-0.0463643	1	-0.0630617	1	-0.00520294	1	-0.00111702	1	0.0210805	1	0.229433	1	0.0700635	1	-0.0059562	1	0.00127197	1	0.0231844	1	0.0760743	0.0416861	0.527574	0.069148	1	0.0317839	0.0475393	0.0496168	FALSE
Aqr	-0.00800631	1	0.061522	1	-0.0449549	1	-0.0251317	1	0.0181552	1	0.0625309	1	-0.0387947	1	-0.0291591	1	0.0151451	1	0.108564	1	0.0963307	1	0.144272	1	0.0853507	1	0.0923975	1	0.17456	1	1	0.0243964	1	0.0478493	1	0.0703106	0.0475188	-0.0102531	FALSE
Tmpo	0.137611	1	0.105761	1	0.148832	1	0.0609434	1	-0.0386667	1	0.086412	1	-0.0510251	1	-0.115827	1	0.0379168	1	0.0743833	1	0.218755	1	0.191749	1	-0.0850256	1	0.0207171	1	-0.0801372	1	1	0.0273775	1	0.0381478	1	0.0769546	0.0474933	0.136446	FALSE
Zfpm1	0.0205513	1	0.0277393	1	0.026289	1	0.086503	0.00566877	0.0495398	1	0.0538437	1	0.0386264	1	0.0802967	0.0907933	0.0718466	1	0.0392633	1	0.0318186	1	0.0409352	1	-0.0281737	1	0.0866958	1	0.0862705	1	0.410716	0.0313541	0.904236	0.055218	1	0.055837	0.0474697	0.0359179	FALSE
Safb	0.0768218	1	0.121334	0.00203385	0.0351833	1	0.0208331	1	0.00749668	1	0.0454725	1	0.00120108	1	0.0426084	1	0.077032	1	0.0495661	1	0.0312823	1	0.00846885	1	-0.0232738	1	-0.0245793	1	0.241696	1	1	0.0250296	0.259449	0.0356284	1	0.0815705	0.0474095	0.0938663	FALSE
Ifnar2	0.00979012	1	0.0407013	1	0.00775117	1	0.0154522	1	0.00405451	1	0.0259848	1	0.0616393	1	0.0497816	1	0.0415984	1	0.0375503	1	0.0802623	1	0.0816177	1	0.0893599	1	-0.0307815	1	0.195778	1	1	0.0427584	1	0.0288036	1	0.0705459	0.0473693	0.0245354	FALSE
Mccc1	-0.0123511	1	0.0200901	1	-0.012328	1	0.0578093	0.0147791	0.0413738	1	0.0173864	1	0.0477539	1	0.0305897	1	-0.0134651	1	-0.0231099	1	0.0565664	1	0.080606	1	0.0975215	1	0.16793	1	0.153975	1	0.587001	0.0335248	1	0.0633099	1	0.0452349	0.0473565	0.0237694	FALSE
Grcc10	0.0736512	1	0.0312995	1	0.0559049	1	0.0590522	1	-0.0134732	1	0.0193488	1	0.0507349	1	0.0365068	1	0.0663535	1	0.0724176	1	0.035667	1	0.0493154	1	0.103654	1	-0.00937401	1	0.0791401	1	1	0.071902	1	0.0161252	1	0.0540126	0.0473466	0.00205514	FALSE
Limd1	0.00509324	1	0.0150408	1	0.00818521	1	0.0248635	1	0.106557	0.411928	0.016408	1	0.0390046	1	0.00913744	1	0.0147776	1	0.111915	1	0.132007	1	0.0416339	1	0.146926	1	0.0419298	1	-0.00333226	1	1	0.0655604	0.997798	0.0609345	1	0.0155345	0.0473432	0.0696399	FALSE
Ext2	0.0308121	1	0.0624218	1	-0.0228064	1	0.018642	1	0.0423799	1	-0.0864053	1	0.0375592	1	0.0309306	1	0.0133701	1	0.189798	1	0.1808	1	-0.00298424	1	0.134432	1	0.0118938	1	0.068115	1	1	0.0822488	1	0.0656852	1	-0.00614216	0.047264	0.0480419	FALSE
Gapvd1	0.0257254	1	0.0688848	1	0.00449155	1	0.0529912	1	0.0115979	1	-0.00905469	1	0.0500224	1	0.0278102	1	0.0255402	1	0.0483782	1	0.0111781	1	0.14257	1	0.148997	1	0.0713427	1	0.0284065	1	1	0.0652227	1	0.0381628	1	0.0383908	0.0472588	0.0556821	FALSE
Mvp	0.0520169	1	0.0203817	1	0.034526	1	0.0237572	1	0.0501334	1	0.0307814	1	0.0143976	1	0.0243716	1	-0.0294031	1	0.0665984	1	0.144945	1	-0.042217	1	0.0690127	1	0.137658	1	0.111487	1	1	0.0451565	1	0.0754979	1	0.021035	0.0472298	0.0345589	FALSE
Leprot	0.0505165	1	0.0325612	1	0.0349481	1	0.0320289	1	0.0610111	1	0.0474836	1	0.0740306	1	0.0537037	1	-0.0364245	1	0.0904855	1	0.036765	1	-0.0372089	1	0.0607891	1	0.123292	1	0.0835403	1	1	0.0615701	1	0.0614667	1	0.0184677	0.0471682	0.0238365	FALSE
Ano10	0.0446419	1	0.0212142	1	0.0438849	1	0.0191806	1	0.037201	1	0.0404587	1	0.0656209	1	0.0443801	1	-0.00480606	1	0.159417	1	0.0502538	1	-0.0246485	1	0.138968	1	0.0956212	1	-0.0243535	1	1	0.0855657	1	0.0497341	1	0.00610709	0.0471356	0.0036156	FALSE
Ccser2	0.0285177	1	-0.00508525	1	-0.007003	1	0.0440362	1	0.0783221	1	0.0209212	1	0.0551869	1	0.0104309	1	0.0357853	1	0.0459641	1	0.0940026	1	0.0286349	1	0.069088	1	0.188852	1	0.0193427	1	1	0.0485586	1	0.0733045	1	0.0195362	0.0471331	0.0291805	FALSE
Pds5a	0.064732	1	0.102252	0.560282	0.0613469	1	0.0510473	1	0.101134	1	0.0213006	1	0.0458663	1	0.0341891	1	0.07341	1	-0.0938046	1	-0.100189	1	0.0938959	1	0.0528114	1	-0.0117271	1	0.21057	1	1	0.0241305	0.999663	0.0251318	1	0.0921046	0.0471223	0.0294726	FALSE
Selenon	-0.00652258	1	0.0294672	1	-0.0190813	1	0.0179228	1	0.0473529	1	-0.00738066	1	0.0160223	1	0.0242433	1	0.0462395	1	0.0963015	1	0.150267	1	0.0456244	1	0.0342714	1	0.137473	1	0.0943586	1	1	0.0315991	1	0.0777606	1	0.0319521	0.0471039	-0.0126286	FALSE
Clic1	-0.0465571	1	0.102276	1	-0.0196904	1	-0.0467373	1	-0.0289176	1	-0.0493653	1	-0.0583913	1	-0.00763722	1	-0.110091	0.891373	0.273861	1	0.50777	0.000471306	0.370672	1	-0.0285529	1	-0.0317701	1	-0.120688	1	1	0.0187245	0.120823	0.108344	1	0.0141676	0.0470788	0.191322	FALSE
Tmem131	0.0819278	1	0.0602387	1	0.0740123	1	0.032446	1	0.0327139	1	0.0226631	1	0.0249399	1	0.00832995	1	0.00302333	1	0.0211663	1	0.176456	1	0.00279775	1	0.169854	1	0.0451762	1	-0.0498879	1	1	0.0660667	1	0.0645829	1	0.0105217	0.0470571	0.0342831	FALSE
Usp22	0.0297683	1	0.0639574	1	-0.0158628	1	0.0742644	0.874062	0.096364	1	0.0366859	1	0.0365809	1	0.0423856	1	0.0580291	1	0.0897978	1	0.0350479	1	0.0501118	1	0.21283	1	0.112612	1	-0.21692	1	1	0.0886482	1	0.0700733	1	-0.0175911	0.0470435	0.0593555	FALSE
Mysm1	0.0778523	1	0.0783431	1	0.0558629	1	0.0673881	0.110446	-0.0125057	1	0.0645355	1	0.0850736	1	0.0407169	1	0.0301696	1	0.0334483	1	-0.0540308	1	0.10782	1	0.0663507	1	-0.0383099	1	0.102197	1	0.927154	0.0660226	1	0.00284272	1	0.0721169	0.0469941	0.0774416	FALSE
Ankib1	0.0394574	1	0.00764953	1	0.00858032	1	0.0472597	1	0.0633543	1	0.00981954	1	0.0820163	1	0.032438	1	0.0180467	1	0.00704107	1	0.138302	1	0.053705	1	0.128352	1	0.116943	1	-0.0483359	1	1	0.0608253	1	0.0717373	1	0.00836312	0.0469752	0.0312143	FALSE
Slfn8	0.00991274	1	0.00326483	1	0.0555983	1	0.0391079	1	0.00797498	1	0.0470172	1	0.0193542	1	0.0345026	1	0.0358015	1	0.0129235	1	0.103814	1	0.0347751	1	0.0593297	1	0.162997	1	0.0781981	1	1	0.0281256	1	0.0625106	1	0.050278	0.0469714	0.0460282	FALSE
Ascc1	0.0731245	1	-0.00853986	1	0.0449621	1	0.0338128	1	0.0285703	1	0.0237339	1	0.0776755	1	0.0481887	1	0.0087346	1	-0.0133809	1	0.0915556	1	0.0999822	1	0.0767783	1	0.0165048	1	0.102813	1	1	0.049602	1	0.0352559	1	0.0560453	0.0469677	0.0538812	FALSE
Slc3a2	-0.00753212	1	0.0369146	1	0.108967	1	-0.0212024	1	-0.0190824	1	0.0661488	1	0.0752874	1	0.0934887	1	0.0740716	1	0.17697	1	0.0720192	1	0.000170251	1	0.161993	1	-0.0242225	1	-0.0897041	1	1	0.0771032	1	0.0318235	1	0.0319306	0.0469525	0.156956	FALSE
Ubqln2	-0.0389431	1	0.0297826	1	-0.0116926	1	0.0264905	1	0.0175915	1	0.0124322	1	0.0272193	1	0.0467568	1	0.0205077	1	0.254758	1	0.0715167	1	0.0616022	1	0.0848222	1	0.0762062	1	0.0247907	1	1	0.0708693	1	0.0483708	1	0.021528	0.0469227	0.0794177	FALSE
Klhl9	0.0597673	1	0.10191	0.486951	0.0595996	1	0.015716	1	0.0408608	1	0.0182699	1	0.026249	1	-0.00270181	1	0.00174078	1	0.0385151	1	0.0304029	1	0.089077	1	0.0830073	1	0.0562365	1	0.0844023	1	1	0.044651	0.999113	0.0453416	1	0.0506179	0.0468702	0.0363274	FALSE
Kif26b	0.0188783	1	-0.019666	1	0.0370377	1	0.0628674	1	0.0416807	1	-0.0113869	1	0.0883131	0.0337239	0.0961959	0.463969	0.0253105	1	-0.0316051	1	0.192724	1	-0.0462126	1	0.147416	1	0.0771557	1	0.0237427	1	0.746122	0.057174	0.998819	0.0776181	1	0.00569831	0.0468301	0.0480379	FALSE
Zcchc9	0.0134121	1	0.0415898	1	0.058723	1	0.000949634	1	0.05097	1	0.0522098	1	0.0617714	1	0.0161802	1	0.0444652	1	0.170341	1	0.0803477	1	0.0734929	1	0.0374424	1	-0.000174007	1	7.96213e-05	1	1	0.0567834	1	0.0377828	1	0.0457941	0.0467867	0.00639134	FALSE
Gm26870	-0.0146073	1	0.0299534	1	0.20382	1	0.0860182	1	0.0971465	1	-0.0108336	1	0.0818568	1	0.0188266	1	0.0335579	1	-0.332679	1	0.719343	1	-0.269608	1	-0.0137664	1	-0.0319172	1	0.104384	1	1	-0.0386355	1	0.166671	1	0.012264	0.0467663	0.0617189	FALSE
Phrf1	0.0827001	1	0.0132658	1	0.0593264	1	0.0536531	1	0.0283608	1	0.0116099	1	0.0809614	1	0.0268852	1	0.0746581	1	0.131474	1	0.0307681	1	0.0292266	1	0.0689525	1	0.00222053	1	0.0058036	1	1	0.0835483	1	0.0203001	1	0.0361249	0.0466578	0.0681573	FALSE
Mbtps1	0.0581992	1	0.0943249	1	0.0626687	1	0.0450864	1	0.0443095	1	-0.0228804	1	0.0721738	1	0.0373503	1	0.0514477	1	0.0803242	1	0.0197348	1	0.0773501	1	0.0651034	1	0.0386733	1	-0.0242864	1	1	0.0641774	1	0.0468786	1	0.0288599	0.0466386	0.0661566	FALSE
Midn	0.0977272	1	0.0405542	1	0.030863	1	0.106199	9.60885e-07	-0.00132185	1	-0.0052514	1	0.0648735	1	0.00124303	1	0.00267334	1	-0.0007311	1	0.119785	1	-0.0507961	1	0.147907	1	0.123278	1	0.0223609	1	0.00200797	0.0831953	1	0.0567078	1	-3.00649e-05	0.0466243	0.0628625	FALSE
Ppp1r18	0.0704389	1	0.0986053	0.678619	0.112682	1	0.0322821	1	0.0640216	1	-0.0455875	1	0.0399029	1	0.0319748	1	0.0220669	1	-0.115682	1	0.0564032	1	0.069026	1	0.12563	1	0.0164989	1	0.120343	1	1	0.0305144	0.999947	0.0535008	1	0.0557062	0.0465738	0.0247676	FALSE
Pecr	0.00395556	1	-0.0220086	1	0.008526	1	0.0418606	1	0.0933253	1	0.0552427	1	0.0416653	1	0.015459	1	0.043302	1	0.123194	1	-0.0545666	1	-0.0213527	1	0.159594	1	0.156198	1	0.0541417	1	1	0.0740539	1	0.0376814	1	0.0279719	0.0465691	0.0638821	FALSE
Arfgef1	-0.016045	1	-0.0297155	1	-0.0509127	1	0.0407458	1	-0.00748628	1	-0.0315064	1	0.0691855	1	0.0443732	1	0.0159107	1	0.1492	1	0.0811835	1	-0.0316683	1	0.204341	1	0.0622549	1	0.19812	1	1	0.0894854	1	0.030122	1	0.0199887	0.046532	0.0382438	FALSE
Dpp8	0.0108911	1	0.0217672	1	0.0329783	1	0.0341434	1	0.0523991	1	0.000667156	1	0.0645923	0.184631	0.0708949	0.0239487	0.065135	1	0.050529	1	0.0323693	1	-0.02615	1	0.0910193	1	0.00153633	1	0.192836	1	0.971054	0.050235	0.681064	0.0357934	1	0.0530934	0.0463739	0.0413662	FALSE
Scmh1	0.083064	1	-0.0291006	1	0.0331952	1	0.0406227	1	0.0244553	1	0.0555725	1	0.0457786	1	0.0263129	1	0.0220128	1	0.0937967	1	-0.00785163	1	0.170555	1	-0.00192779	1	0.0794125	1	0.0595739	1	1	0.0522668	1	0.0186457	1	0.0681818	0.0463648	0.0497988	FALSE
Ppp2r2d	0.0426607	1	-0.0405534	1	-0.0376978	1	0.0960058	0.0248661	0.0283717	1	0.0232258	1	0.0409202	1	-0.010218	1	-0.00153672	1	0.111637	1	0.165534	1	0.167396	1	0.0417627	1	0.00197866	1	0.0655592	1	0.688329	0.0665973	1	0.0290226	1	0.0433893	0.0463364	-0.0114589	FALSE
Rcn1	0.0853241	1	0.170579	0.00220633	-0.0360805	1	0.0346542	1	-0.00912548	1	-0.0273916	1	-0.0203658	1	0.00392718	1	-0.0189043	1	0.163107	1	-0.0602442	1	-0.0590738	1	0.208751	1	0.278079	1	-0.0186962	1	1	0.0942939	0.269775	0.0766431	1	-0.0320293	0.0463026	0.100517	FALSE
Mgst2	-0.0835433	1	-0.125676	1	0.0282658	1	-0.0247437	1	-0.0178853	1	-0.0450473	1	0.105361	1	0.0590204	1	0.134514	1	0.134694	1	-0.00732138	1	0.230203	1	0.135394	1	0.0422529	1	0.129018	1	1	0.0534325	1	-0.00992179	1	0.0953907	0.0463005	-0.0347315	FALSE
Tmem214	0.106402	1	0.0469145	1	0.0746732	1	0.0392368	1	0.00850828	1	0.0190076	1	0.070583	1	0.0446801	1	0.070273	1	0.194245	1	0.107426	1	-0.0125926	1	-0.0227176	1	-0.0905053	1	0.0383354	1	1	0.0775499	1	0.0234047	1	0.0379393	0.046298	0.0733756	FALSE
Gjb4	0.0683907	1	0.210974	0.00118143	0.0680011	1	-0.00554341	1	-0.0257192	1	-0.0782832	1	0.0233282	1	-0.0258285	1	-0.0588207	1	0.071455	1	0.0886783	1	-0.012448	1	-0.0431469	1	0.0706687	1	0.342433	1	1	0.0228967	0.197954	0.0637546	1	0.0521765	0.0462759	0.0751332	FALSE
Gbf1	0.0965604	1	0.0354689	1	0.0605716	1	0.0385433	1	-0.0571779	1	-0.0153668	1	0.130283	0.000304867	0.0557617	1	0.0500653	1	0.0216437	1	-0.0497786	1	0.00366504	1	0.192616	1	0.0217138	1	0.109509	1	0.0942864	0.0959293	1	0.00119757	1	0.0416889	0.0462719	0.060978	FALSE
Lmbrd1	0.0375036	1	0.0650182	1	0.0435366	1	0.0134784	1	0.0426155	1	-0.0457048	1	0.00699671	1	0.0243392	1	-0.00148953	1	0.0596962	1	0.12571	1	0.0110061	1	0.0808693	1	0.074654	1	0.155711	1	1	0.0397088	1	0.0664674	1	0.0326119	0.0462627	0.0251932	FALSE
Zdhhc12	-0.0405086	1	0.0221123	1	-0.090414	1	0.0344787	1	0.0608497	1	-0.00270985	1	-0.0472441	1	-0.00432015	1	0.0392602	1	0.161795	1	0.025665	1	0.0980999	1	0.148327	1	0.0849137	1	0.203486	1	1	0.0513697	1	0.0378441	1	0.0495444	0.0462527	0.0774832	FALSE
Mllt10	0.0909591	1	0.201792	7.32478e-09	0.107142	1	0.034593	1	0.0452539	1	-0.041299	1	0.0239443	1	0.0252067	1	0.05641	1	-0.0336783	1	-0.0193922	1	0.0120295	1	0.113029	1	-0.0843346	1	0.160622	1	1	0.0457695	4.70306e-05	0.0337052	1	0.0589809	0.0461518	0.0525404	FALSE
Exoc1	0.0527671	1	0.0164328	1	-0.0120355	1	0.0461365	1	-0.00309231	1	0.0448833	1	0.0350112	1	0.00983472	1	0.0291098	1	0.00821859	1	0.107301	1	0.13972	1	0.227335	1	0.0181544	1	-0.0277045	1	1	0.0738936	1	0.0297261	1	0.0347947	0.0461381	0.0325159	FALSE
Fmnl3	0.0807098	1	0.0164941	1	0.0208061	1	0.0604867	1	0.0342659	1	-0.0527211	1	0.0633328	0.347597	0.0402976	1	0.0157208	1	0.263179	1	0.00733757	1	0.0350585	1	0.162262	1	0.0353	1	-0.090887	1	0.995395	0.125994	1	0.026739	1	-0.0144045	0.0461095	0.041703	FALSE
Smad7	-0.0398998	1	0.0268234	1	-0.0798285	1	-0.0472973	1	0.0225522	1	-0.093834	1	0.0990084	1	0.241729	0.000146051	0.140709	1	0.0924067	1	0.299836	1	-0.157955	1	0.10004	1	0.145991	1	-0.0593991	1	1	0.0408516	0.0609194	0.147386	1	-0.0500614	0.0460589	0.0259806	FALSE
Slc29a1	0.0526892	1	-0.0352393	1	-0.0692163	1	0.030217	1	0.0336793	1	-0.0467888	1	0.123977	0.343746	0.0588346	1	-0.0481535	1	0.118042	1	0.296377	1	-0.0368637	1	0.0690061	1	0.183704	1	-0.0401199	1	0.99519	0.0787862	1	0.107471	1	-0.0482284	0.0460096	0.122355	FALSE
Senp2	0.0646779	1	0.0841102	0.0533895	0.0312543	1	0.024117	1	-0.0282895	1	-0.0228046	1	0.0331422	1	0.042254	1	0.0410611	1	0.0350395	1	0.0810758	1	0.0491595	1	0.186854	1	-0.0501184	1	0.118368	1	1	0.0687661	0.826862	0.0258064	1	0.0434077	0.0459934	0.0502354	FALSE
Nphp1	0.0611992	1	0.0361007	1	0.076391	1	0.0349869	1	0.0130093	1	0.0478903	1	0.0159844	1	0.00178793	1	0.0333371	1	0.102672	1	0.104756	1	-0.0205191	1	0.160585	1	0.0579758	1	-0.0363073	1	1	0.0750855	1	0.0427259	1	0.0201584	0.0459899	0.039917	FALSE
Itch	0.0155476	1	0.0497177	1	0.0586775	1	0.0478972	1	0.0576415	1	-0.0166901	1	0.0297429	1	0.0702566	1	0.0562477	1	-0.039699	1	-0.0246952	1	0.0246796	1	0.171941	1	0.077213	1	0.109701	1	1	0.045086	1	0.0460267	1	0.0465232	0.0458786	0.000602544	FALSE
Adam10	0.0698684	1	0.051151	1	0.0261281	1	0.0270141	1	0.0375088	1	0.00163283	1	0.0765182	0.0745681	0.0412038	1	0.0131762	1	0.0429903	1	0.145882	1	0.0274459	1	0.0976146	1	-0.0444865	1	0.073996	1	0.877983	0.0628011	1	0.0462518	1	0.0284758	0.0458429	0.0670379	FALSE
Chst12	0.0324293	1	-0.0631391	1	0.00529476	1	0.0758301	1	0.0263767	1	-0.0756442	0.873235	0.0671299	1	0.0122196	1	-0.024275	1	0.0669369	1	0.0458384	1	0.198023	1	0.253896	1	0.0823687	1	-0.0163283	1	1	0.0992444	1	0.0207329	1	0.017414	0.0457971	0.118879	FALSE
Sqle	0.0444068	1	0.0947498	1	0.00410297	1	0.137768	0.0285527	0.110834	1	-0.0710231	1	0.0339606	1	-0.00129952	1	0.00477901	1	0.234301	1	0.175255	1	0.0288378	1	0.12391	1	-0.240546	1	0.00637978	1	0.71483	0.114869	1	0.0277987	1	-0.0053847	0.045761	0.0919158	FALSE
Spns1	0.0554256	1	0.0709124	0.159863	0.0663488	1	0.00250354	1	0.00204822	1	0.0196862	1	0.0268835	1	0.0310454	1	0.0446666	1	-0.0067062	1	0.0462666	1	-0.0384059	1	0.00703843	1	0.105796	1	0.252242	1	1	0.017029	0.961126	0.0512137	1	0.0689075	0.0457167	0.029766	FALSE
Cdk2ap2	0.260547	0.0583371	-0.0706558	1	0.155368	1	0.0583728	1	0.0746135	1	-0.0104766	1	0.139783	0.0409872	0.0653516	1	0.0484203	1	0.0898255	1	-0.167789	1	-0.045942	1	0.134307	1	-0.0278129	1	-0.0182255	1	0.280265	0.136567	1	-0.0252586	1	0.0258288	0.0457125	0.0800769	FALSE
Adamts1	0.116391	1	0.0978626	1	0.00285981	1	-0.0180348	1	0.0271843	1	-0.0153152	1	0.0492817	1	0.00281969	1	0.0354445	1	0.0578249	1	0.254084	1	0.114034	1	-0.0324849	1	-0.019209	1	0.0122875	1	1	0.0345955	1	0.0725482	1	0.0298621	0.0456686	0.0217749	FALSE
Mdfic	0.10385	1	0.0536381	1	0.0571303	1	0.0310088	1	0.0518761	1	0.0311912	1	0.0906032	0.0247717	0.0638265	0.0357298	0.0623959	1	-0.0414516	1	0.110226	1	-0.0239918	1	-0.0444183	1	0.0921311	1	0.0459279	1	0.687595	0.0279184	0.756781	0.0743396	1	0.0345307	0.0455963	0.0331539	FALSE
Taok1	0.0760422	1	0.0701932	1	0.00412853	1	0.0605148	1	0.0559496	1	0.0142162	1	0.0115147	1	-0.011921	1	0.0498316	1	0.0773604	1	0.170026	1	0.0415374	1	-0.00225311	1	0.0374201	1	0.0293486	1	1	0.0446358	1	0.0643336	1	0.0278125	0.0455939	0.0390514	FALSE
Fam122a	0.0440642	1	0.0217987	1	0.017553	1	0.0982281	8.44322e-05	0.0342886	1	0.0683053	1	0.112694	0.228503	-0.0256106	1	0.0567395	1	0.0178058	1	-0.146903	1	-0.165845	1	0.317234	1	0.0947867	1	0.138561	1	0.0166435	0.118005	1	-0.00432797	1	0.0230627	0.0455799	0.0535605	FALSE
Pdzd8	0.0423719	1	0.0484569	1	0.106177	1	0.0318758	1	0.0449395	1	0.0247116	1	0.0363226	1	0.0391334	1	0.0698874	1	0.0658966	1	0.100862	1	0.0417259	1	0.0166355	1	0.0552414	1	-0.0408282	1	1	0.0386205	1	0.0577267	1	0.0403348	0.0455607	0.0352989	FALSE
Mast3	0.0612851	1	0.0334696	1	0.0312649	1	0.0128609	1	0.0214483	1	0.0526266	1	0.0175372	1	0.0193534	1	0.0319672	1	0.0854982	1	-0.0700641	1	0.0767075	1	0.0172903	1	0.0905137	1	0.201489	1	1	0.0388943	1	0.0189442	1	0.0788111	0.0455499	0.0135644	FALSE
Mif4gd	0.085244	1	0.0169394	1	0.011379	1	0.0480589	0.730804	-0.0159808	1	0.0140586	1	0.0236144	1	0.0179801	1	-0.00494768	1	-0.00846264	1	0.11311	1	-0.00817921	1	0.0921675	1	0.039718	1	0.258317	1	0.999981	0.0481244	1	0.0343533	1	0.0541255	0.0455344	0.0474648	FALSE
Selenoi	0.0619032	1	0.105773	0.0547381	0.116145	1	0.0331219	1	0.0986766	1	0.0146064	1	0.00866579	1	0.0240188	1	0.0637099	1	-0.0368948	1	-0.095579	1	0.0110847	1	-0.0505549	1	0.160278	1	0.168042	1	1	0.00324824	0.830934	0.0586334	1	0.0747177	0.0455331	0.0202931	FALSE
Shc1	0.134924	1	0.0787571	1	0.0514843	1	0.0350755	1	0.0458483	1	-0.00108712	1	0.0552532	1	0.0379707	1	-0.0166216	1	0.026019	1	0.0977374	1	0.0794154	1	0.106393	1	0.00738864	1	-0.0559773	1	1	0.071533	1	0.0535404	1	0.0114427	0.0455054	0.0490726	FALSE
Arhgap17	0.0585008	1	0.0211637	1	0.0391137	1	0.024846	1	0.0260977	1	0.143477	1	0.0467555	1	0.0594723	1	0.0535272	1	0.00509254	1	0.0447348	1	-0.0401563	1	0.076363	1	0.0527252	1	0.0707144	1	1	0.0423116	1	0.0408387	1	0.0533352	0.0454952	0.0791503	FALSE
Uba6	0.0721612	1	0.122425	0.0210732	0.107645	1	0.0375647	1	0.0615	1	0.0271765	1	0.00537399	1	0.00606634	1	0.0429376	1	0.000179978	1	0.0397922	1	0.152465	1	0.0391181	1	-0.0170934	1	-0.0151804	1	1	0.0308796	0.656214	0.0425381	1	0.0630089	0.0454755	0.00509706	FALSE
Commd3	-0.0333295	1	-0.0233782	1	-0.0366651	1	-0.00234365	1	-0.0280491	1	0.0623423	1	0.0751072	1	0.0599245	1	0.0494706	1	0.0960362	1	0.246303	1	-0.0163212	1	-0.0328871	1	0.0614392	1	0.204393	1	1	0.0205166	1	0.0632478	1	0.0526438	0.0454694	0.0611367	FALSE
Decr2	0.0167015	1	0.0341213	1	0.0662037	1	0.0280337	1	0.0216606	1	0.022717	1	0.0617305	0.116998	0.0370264	1	0.060506	1	-0.0379326	1	0.0642397	1	-0.00609568	1	0.148166	1	0.105494	1	0.0583081	1	0.933256	0.0433398	1	0.0525083	1	0.0403278	0.045392	0.0275292	FALSE
Ifngr2	0.0276491	1	0.0517073	1	0.00565304	1	0.0248397	1	0.0686382	1	0.0499	1	0.0115767	1	0.0339116	1	0.0220324	1	0.0256288	1	-0.0106532	1	0.0118678	1	0.0345091	1	0.032355	1	0.291054	1	1	0.0248407	1	0.0351918	1	0.0761015	0.045378	0.0280816	FALSE
Tcf12	0.11207	1	0.0325754	1	-0.0165591	1	0.106918	0.000151199	0.0462657	1	-0.106272	1	0.121506	0.0834371	0.0821989	1	0.0117318	1	0.124655	1	0.184191	1	-0.0352544	1	0.0710697	1	0.0120494	1	-0.0666641	1	0.0124876	0.107244	1	0.0714561	1	-0.0426036	0.0453654	0.0724554	FALSE
Gclm	0.0601183	1	-0.0410628	1	0.164614	1	0.104866	1	-0.0315047	1	0.0440384	1	-0.0182497	1	-0.118446	1	0.0993039	1	0.0781578	1	-0.0372208	1	0.193115	1	0.103752	1	-0.0858649	1	0.164779	1	1	0.0657288	1	-0.0628198	1	0.13317	0.0453597	0.162852	FALSE
Lats1	-0.0104952	1	0.0216974	1	0.0256974	1	0.0021317	1	0.0205916	1	0.0315644	1	-0.00948407	1	0.00881885	1	0.0242239	1	0.0516008	1	0.0499141	1	0.0877995	1	0.0666969	1	0.0844349	1	0.225023	1	1	0.02009	1	0.0370914	1	0.0788616	0.0453477	0.0260814	FALSE
Galnt11	0.040787	1	0.0523731	1	0.0419481	1	0.0880879	0.0136195	0.0665925	1	0.107149	1	0.0744901	0.0176822	0.0756488	0.475737	0.0406094	1	0.00402923	1	-0.0522999	1	-0.0659239	1	0.00126099	1	0.156879	1	0.0483352	1	0.0821638	0.041731	0.998979	0.0598387	1	0.0344235	0.0453311	0.0192491	FALSE
Clasp1	0.000229876	1	0.0528015	1	0.0898609	1	0.0537726	1	0.0246577	1	0.0926501	1	0.0362941	1	0.054343	1	0.024987	1	-0.0339519	1	0.0546698	1	-9.85396e-05	1	0.00871521	1	0.0213426	1	0.199657	1	1	0.013012	1	0.0415629	1	0.0814113	0.0453287	0.0413148	FALSE
Wac	0.0428585	1	0.0616087	1	0.0562983	1	0.0705793	1	0.0378154	1	0.0332551	1	0.10512	1	0.0659519	1	-0.0266402	1	0.118161	1	-0.101715	1	0.016432	1	-0.0310883	1	0.127664	1	0.103036	1	1	0.0611261	1	0.0382649	1	0.0364762	0.0452891	0.0978522	FALSE
Clcc1	0.0661168	1	0.0425968	1	0.039834	1	0.0995609	1.05237e-05	0.0157338	1	0.0652095	1	0.0537357	1	0.0545141	1	0.0735472	1	0.0707457	1	0.0379717	1	0.0971738	1	-0.0293234	1	-0.0893564	1	0.0812242	1	0.0110315	0.0521671	1	0.012292	1	0.0713977	0.0452856	-0.00444361	FALSE
Rbm6	0.0573975	1	0.0517904	1	-0.00352217	1	0.0458787	1	0.0191831	1	0.0386931	1	0.0552995	1	0.058317	1	0.0968843	1	0.0384828	1	0.185402	1	0.0915639	1	0.0585324	1	-0.0394209	1	-0.0755952	1	1	0.0511182	1	0.0550543	1	0.0296048	0.0452591	0.0726405	FALSE
4931406C07Rik	0.0747742	1	0.00775952	1	0.0329167	1	0.0588182	1	0.00739351	1	0.0245727	1	0.118883	0.000793867	0.0819723	0.883956	0.0528737	1	0.17639	1	0.061191	1	0.0204968	1	-0.0186883	1	-0.0811847	1	0.0606736	1	0.160719	0.0820354	1	0.0154263	1	0.0383067	0.0452562	0.0124766	FALSE
Zfyve16	0.047021	1	0.0479736	1	0.0474899	1	0.0217655	1	0.056998	1	0.064375	1	0.0601055	1	0.0318028	1	-0.0198472	1	0.0519012	1	0.110375	1	0.148419	1	0.0301854	1	0.0447267	1	-0.0653361	1	1	0.0421957	1	0.0583752	1	0.0350201	0.045197	0.0500536	FALSE
Rab1a	0.0535021	1	0.0146961	1	0.0445938	1	0.0214531	1	0.0526284	1	0.00482001	1	0.00497657	1	0.0263375	1	0.030668	1	0.153761	1	0.0970215	1	-0.0936495	1	0.072291	1	0.0402498	1	0.154168	1	1	0.0611968	1	0.0461866	1	0.0281201	0.0451678	-0.0268249	FALSE
Bmpr1a	0.0600105	1	0.0726799	0.162913	0.075818	1	0.0224301	1	0.0180207	1	0.0361776	1	0.0629226	1	0.0427062	1	0.0273664	1	-0.0222887	1	0.0805088	1	0.0480069	1	0.0153138	1	0.0396421	1	0.0968758	1	1	0.0276777	0.962533	0.0507115	1	0.0568489	0.0450794	0.0329528	FALSE
Padi4	0.0307225	1	-0.00545649	1	0.051379	1	0.0277123	1	0.0150433	1	0.0110955	1	0.0496536	1	0.0069925	1	0.0180972	1	0.148289	1	0.0466363	1	0.0208287	1	0.00482951	1	0.0108593	1	0.239465	1	1	0.0522413	1	0.014815	1	0.0681731	0.0450764	0.0468916	FALSE
Ctcf	0.0600858	1	0.0129398	1	0.0127727	1	0.0334565	1	-0.00376532	1	-0.0378629	1	0.094472	1	-0.0326882	1	0.0457644	1	0.237017	1	0.0375125	1	0.223602	1	0.0603494	1	-0.0273449	1	-0.0401711	1	1	0.0970762	1	-0.00266921	1	0.040821	0.045076	0.113623	FALSE
Malsu1	-0.052249	1	-0.126007	1	0.0285271	1	0.0257339	1	-0.037996	1	0.0236087	1	0.0539616	1	0.0184805	1	0.00987236	1	0.344583	1	0.00892542	1	-0.0826052	1	0.0737311	1	0.135001	1	0.252563	1	1	0.0891521	1	-0.000319291	1	0.0463932	0.0450753	0.103144	FALSE
Ciz1	-0.00771798	1	0.0245361	1	-0.02154	1	0.0501278	1	0.0102476	1	0.0683175	1	0.024793	1	0.023871	1	0.073942	1	0.084227	1	0.0952993	1	0.10624	1	0.0510589	1	-0.0454145	1	0.137955	1	1	0.0404977	1	0.0217079	1	0.0729829	0.0450628	0.0562297	FALSE
Hsph1	0.102329	1	0.212515	1.0617e-05	0.11194	1	-0.0507618	1	0.121517	1	0.0356419	1	-0.0355632	1	0.110546	1	0.137592	1	-0.196679	1	-0.106347	1	0.0126658	1	-0.136788	1	0.329734	1	0.0271633	1	1	-0.0634926	0.0110985	0.133593	1	0.0650007	0.0450337	-0.103349	FALSE
Crim1	0.0417128	1	-0.0643481	1	0.01047	1	0.0341212	1	0.046601	1	-0.0275243	1	0.0799796	1	0.0566939	1	0.0661462	1	0.233922	1	-0.147546	1	0.0922798	1	0.153904	1	0.0903594	1	0.00848946	1	1	0.108728	1	-0.003648	1	0.0299722	0.0450174	0.046716	FALSE
Def6	0.0222981	1	0.0161439	1	0.0147015	1	0.0203657	1	0.00201753	1	0.0491159	1	0.0194715	1	0.039102	1	0.0214474	1	0.180811	1	0.194101	1	0.217531	1	0.0480559	1	-0.0373998	1	-0.134734	1	1	0.0582004	1	0.0427929	1	0.0336123	0.0448685	0.0797393	FALSE
Pibf1	0.0592977	1	0.0356439	1	0.0422812	1	0.0156303	1	0.0107462	1	0.0175724	1	0.0489556	1	0.00954022	1	0.00733872	1	0.0892866	1	0.0146031	1	0.010163	1	0.116769	1	0.152683	1	0.0424994	1	1	0.0659878	1	0.0446432	1	0.0239709	0.0448673	0.0230167	FALSE
Ddhd2	-0.0437084	1	-0.0198961	1	-0.0193804	1	0.0168594	1	-0.00674298	1	0.0215247	1	0.0959024	0.8986	0.0109968	1	0.0754372	1	-0.0863368	1	-0.0255413	1	0.201161	1	0.100008	1	0.147263	1	0.205275	1	1	0.0165449	1	0.0212159	1	0.0968035	0.0448548	0.0308199	FALSE
Zfp322a	0.0450987	1	0.0327065	1	0.00320636	1	0.0178944	1	-0.00343335	1	0.0528945	1	0.0551481	1	0.0865958	0.0354446	0.0582756	1	-0.0118288	1	0.0564003	1	0.0627851	1	0.14422	1	0.0782256	1	-0.00552039	1	1	0.0501064	0.75531	0.050099	1	0.0343282	0.0448446	0.0587545	FALSE
Wnt4	-0.148201	1	-0.118681	1	0.134261	1	0.0277907	1	0.169951	1	-0.0250696	1	0.0688183	1	0.215357	1	0.0146206	1	0.103428	1	0.302038	1	-0.0268782	1	0.0178635	1	-0.00661043	1	-0.0563919	1	1	0.0139399	1	0.112411	1	0.00810827	0.0448197	0.0856554	FALSE
Kctd2	0.0507188	1	-0.0223627	1	0.0139289	1	0.0367281	1	0.010708	1	0.0437329	1	0.0710843	1	0.0285599	1	-0.00602177	1	0.00213136	1	0.230904	1	0.069198	1	0.0941354	1	0.0560142	1	-0.00719357	1	1	0.0509596	1	0.0607647	1	0.0227289	0.0448177	0.040059	FALSE
Pign	0.0592914	1	0.0159542	1	0.0297246	1	0.0199951	1	0.0374229	1	0.0122845	1	0.0242119	1	0.00462409	1	0.0350496	1	0.0675703	1	0.0706263	1	0.059936	1	0.0655106	1	0.0458081	1	0.123894	1	1	0.0473159	1	0.0348871	1	0.0521777	0.0447936	0.0316317	FALSE
Ddx6	0.0905778	1	0.0148344	1	-0.00345844	1	0.0741212	1	-0.010426	1	-0.0281072	1	0.103596	1	0.0144787	1	-0.0263457	1	0.252593	1	0.0385391	1	0.0387185	1	0.0106804	1	0.0781897	1	0.0231172	1	1	0.106314	1	0.0271232	1	0.000784868	0.0447405	0.0880884	FALSE
Pwwp2b	0.0288117	1	0.0188033	1	0.015195	1	0.0270788	1	0.0113332	1	0.0294413	1	0.0236226	1	0.0116365	1	0.0173765	1	0.0248528	1	0.132615	1	0.048876	1	0.0416727	1	0.142151	1	0.0976002	1	1	0.0292077	1	0.0633078	1	0.0416978	0.0447378	0.0501943	FALSE
Cars2	0.0151723	1	0.0215959	1	0.030348	1	0.0114432	1	-0.0161473	1	0.00693321	1	0.0276628	1	0.0272059	1	0.0178597	1	-0.0154123	1	0.0224033	1	-0.0478262	1	0.173159	1	0.215123	1	0.181446	1	1	0.042405	1	0.0540362	1	0.0377521	0.0447311	0.0278957	FALSE
Brd3	0.014455	1	0.0842821	1	-0.0196717	1	0.032204	1	0.00693112	1	0.0378433	1	-0.00354287	1	0.00132893	1	0.0391931	1	0.248522	1	-0.075994	1	0.101554	1	0.100429	1	0.0902308	1	0.013199	1	1	0.0784135	1	0.0213558	1	0.0344236	0.044731	0.0526636	FALSE
Wdfy1	0.0620244	1	-0.0213347	1	-0.0149045	1	0.0247457	1	0.0284046	1	-0.0307044	1	0.0755961	0.294022	0.0302643	1	0.024617	1	0.0119879	1	-0.0127866	1	0.0873646	1	0.155878	1	0.128336	1	0.12131	1	0.991609	0.0660463	1	0.0305768	1	0.0375366	0.0447199	0.0766904	FALSE
Nr3c1	0.06934	1	0.0015528	1	0.0798	1	0.0393163	1	-0.00409853	1	0.0310832	1	0.0844471	1	0.0532614	1	-0.0067207	1	-0.00779168	1	0.0716171	1	-0.04905	1	0.142331	1	-0.0423861	1	0.207046	1	1	0.0655286	1	0.0159893	1	0.0524316	0.0446499	0.0392684	FALSE
Mrps21	-0.104263	1	-0.108567	1	0.035859	1	0.0631318	1	0.156674	0.123463	0.172696	1	0.0318771	1	0.100299	0.148306	0.0824338	1	0.0830224	1	0.0413508	1	-0.0723123	1	0.053194	1	0.0758122	1	0.0579446	1	1	0.0253925	0.628781	0.0531138	1	0.0553242	0.0446102	-0.179708	FALSE
Ranbp2	0.0701726	1	0.0763944	1	0.0404819	1	0.0317716	1	-0.0117306	1	-0.0137985	1	0.0606836	1	-0.00139751	1	0.0873617	1	0.0339325	1	0.0198409	1	0.148559	1	0.028151	1	0.0779101	1	0.0205571	1	1	0.0449422	1	0.0322035	1	0.0566323	0.0445927	0.0284128	FALSE
Inpp5f	-0.0357423	1	-0.0195229	1	0.0137825	1	0.0715993	1	0.105487	1	0.0163842	1	0.0784377	1	0.0624	1	0.0445526	1	0.148843	1	0.118157	1	0.110727	1	0.0043083	1	-0.0372097	1	-0.0135507	1	1	0.0534892	1	0.0458623	1	0.0343791	0.0445768	0.0743612	FALSE
Setx	0.0803173	1	0.0757782	0.133019	0.0723675	1	0.0503097	1	0.000139995	1	0.0189381	1	0.0316781	1	0.00502494	1	0.0110668	1	0.0703894	1	0.0271268	1	0.0513652	1	0.0885109	1	0.0112566	1	0.0740677	1	1	0.0642411	0.945776	0.0238653	1	0.0455611	0.0445558	0.056998	FALSE
Rpap1	0.0482365	1	0.0427739	1	0.0245318	1	0.0449634	1	0.0342649	1	0.0540709	1	-0.00837676	1	0.0145197	1	0.020201	1	0.0347352	1	0.028966	1	0.0357127	1	0.0836792	1	0.0928099	1	0.116505	1	1	0.0406475	1	0.0426669	1	0.0502043	0.0445062	0.0157704	FALSE
Ssh2	0.0200554	1	0.0219516	1	0.0556515	1	0.0333465	1	0.0229965	1	0.0197869	1	0.0314793	1	0.0102216	1	0.0376004	1	0.0413132	1	0.0343878	1	0.0421592	1	0.0750474	1	0.0695402	1	0.151747	1	1	0.0402484	1	0.0318195	1	0.0613891	0.0444856	0.0377383	FALSE
Rai14	0.0614098	1	-0.0184859	1	0.0271183	1	0.10572	0.993981	0.0551887	1	0.139983	1	0.0439036	1	0.0123936	1	0.0290131	1	0.249512	1	-0.0998522	1	0.0557974	1	-0.0445407	1	0.0125608	1	0.037283	1	1	0.0832011	1	-0.00763898	1	0.057839	0.044467	0.0563845	FALSE
Lpar6	0.0059683	1	0.0273142	1	0.00478717	1	0.00327861	1	0.0121089	1	0.0140563	1	0.0223805	1	0.0158055	1	0.0421472	1	0.0225021	1	0.0235492	1	-0.0434637	1	0.071651	1	0.157743	1	0.286437	1	1	0.0251561	1	0.0473043	1	0.0607928	0.0444177	0.0154538	FALSE
Tmem245	0.0536507	1	0.0261143	1	0.0481804	1	0.0403703	1	0.0481891	1	0.0674915	1	0.0419445	1	0.0207302	1	0.0461792	1	0.0276981	1	0.0258105	1	0.0977953	1	0.0654149	1	0.112968	1	-0.0568921	1	1	0.0458157	1	0.0467625	1	0.0405509	0.0443764	0.0260181	FALSE
Ptp4a2	0.186108	1	0.0910873	1	0.094669	1	0.0482576	1	0.0547817	1	0.00471073	1	0.109913	1	-0.00848959	1	-0.0584996	1	0.153128	1	-0.0564433	1	-0.0430914	1	0.267162	1	-0.135431	1	-0.0429943	1	1	0.152914	1	-0.010899	1	-0.0090411	0.0443245	0.0590905	FALSE
Kdm5c	-0.0205547	1	0.0190386	1	0.0223234	1	0.0394541	1	0.0342602	1	0.0927151	1	0.0173341	1	-0.00116251	1	-0.0562327	0.0651068	0.0469723	1	0.177631	1	0.034536	1	0.11555	1	0.0185211	1	0.124104	1	1	0.0397511	1	0.0496576	0.858151	0.0434892	0.0442993	0.0381965	FALSE
Fam45a	0.0554872	1	-0.0336928	1	0.0137105	1	0.0253457	1	0.038487	1	0.0263922	1	0.0673782	0.213692	0.00515669	1	0.018804	1	-0.0456303	1	0.165627	1	0.0945314	1	0.13432	1	0.122221	1	-0.0250687	1	0.979316	0.0473802	1	0.0595598	1	0.0256739	0.0442046	0.0456572	FALSE
Zfp503	-0.0482968	1	-0.0812403	1	-0.0998427	1	0.0259821	1	-0.0578184	1	-0.0158848	1	0.104342	1	0.0165965	1	0.110821	1	0.267293	1	0.159056	1	0.0564753	1	0.0936649	1	-0.0245731	1	0.156067	1	1	0.088597	1	0.00240409	1	0.0415273	0.0441761	0.114295	FALSE
Rnf146	-0.0298557	1	0.0217421	1	0.0115332	1	0.0555855	0.636056	0.0775604	1	0.0684492	1	0.00295273	1	0.00937948	1	0.0472287	1	-0.00898979	1	0.148892	1	0.0929257	1	0.120594	1	0.103243	1	-0.0590117	1	0.999891	0.0280574	1	0.0721634	1	0.032225	0.0441486	0.0465695	FALSE
Mrps18c	0.00730475	1	-0.106061	1	0.0332461	1	0.0286683	1	-0.014068	1	0.0289098	1	0.057457	1	0.0642331	1	0.0591398	1	-0.0482458	1	0.029031	1	0.138564	1	0.173946	1	0.0448111	1	0.165099	1	1	0.043826	1	0.0035892	1	0.0849917	0.0441356	-0.0272216	FALSE
Ptms	0.244608	0.333475	0.0543161	1	0.0285201	1	0.157912	9.31505e-07	0.0114161	1	-0.0982328	1	0.185597	0.00184266	0.113535	1	-0.065118	1	0.234272	1	0.359248	1	-0.242412	1	0.0255936	1	-0.0617676	1	-0.285819	1	5.9536e-06	0.169596	1	0.0953496	1	-0.132612	0.0441112	0.100161	FALSE
Srsf10	0.0799849	1	0.0218795	1	0.0396051	1	-0.00749715	1	0.0362541	1	0.0660778	1	-0.0271831	1	0.000765563	1	0.0399724	1	0.0793102	1	0.0727246	1	0.141644	1	0.0366329	1	0.0760586	1	0.00543326	1	1	0.0322495	1	0.0415365	1	0.0585465	0.0441108	0.0261681	FALSE
Fibp	0.154142	1	0.0161807	1	0.134671	1	0.040311	1	0.00370451	1	0.0115867	1	0.150619	0.022276	0.0207207	1	0.00920913	1	0.21846	1	0.0801462	1	-0.0991947	1	-0.0296212	1	-0.0926741	1	0.0433123	1	0.667019	0.106782	1	0.00561561	1	0.0199168	0.0441049	0.0966578	FALSE
Wsb1	-0.108045	1	0.0296977	1	-0.00513545	1	-0.0796798	1	0.0134091	1	0.0306629	1	-0.0196394	1	-0.00297334	1	0.0688677	1	-0.0991855	1	0.0977246	1	0.219624	1	0.040363	1	0.112039	1	0.362701	1	1	-0.0532373	1	0.0499795	1	0.135344	0.0440287	-0.00295606	FALSE
Faf2	0.0885459	1	0.0733988	1	-0.0170792	1	0.141373	1.51625e-06	0.132324	0.686324	0.0577718	1	0.133557	0.139866	0.00406518	1	0.0260376	1	0.0617198	1	-0.0570723	1	0.0277705	1	0.272458	1	-0.0471995	1	-0.237331	1	0.000649423	0.139531	0.999954	0.0211033	1	-0.028566	0.0440226	0.129354	FALSE
Ldlrap1	0.0907279	1	-0.00193951	1	0.0838727	1	0.0445739	1	-0.0286789	1	0.0136554	1	0.0482244	1	0.00316312	1	0.0428764	1	0.0847476	1	0.0416876	1	0.125324	1	-0.0135307	1	0.06277	1	0.0622643	1	1	0.0509486	1	0.0154005	1	0.0655985	0.0439825	0.0294526	FALSE
Rhoq	0.0264112	1	0.143939	1.44492e-07	0.0156853	1	0.0336129	1	0.050996	1	0.0112643	1	0.03938	1	0.0400048	1	0.0222319	1	-0.0804618	1	0.0292848	1	0.0136039	1	0.10792	1	0.0891121	1	0.116753	1	1	0.0253724	0.000484905	0.0706674	1	0.0359077	0.0439825	-0.00944419	FALSE
Med1	0.0236697	1	0.0458496	1	-0.0120552	1	0.0543916	1	0.0256437	1	0.0401724	1	0.0602209	1	0.0333683	1	0.0709823	1	0.130463	1	0.0540944	1	0.0144752	1	-0.0353708	1	0.089041	1	0.0647723	1	1	0.0466749	1	0.0495994	1	0.0356694	0.0439812	0.0578612	FALSE
Sirt5	0.0633762	1	0.00930832	1	0.0221085	1	0.0429702	1	0.0827051	1	0.0400857	1	0.0793865	0.614591	0.0476452	1	0.0215803	1	0.119049	1	0.0987695	1	-0.00386332	1	0.0184137	1	0.0503586	1	-0.0326147	1	0.999848	0.0646392	1	0.0577573	1	0.00945928	0.0439519	0.0446498	FALSE
Sfi1	0.0346777	1	0.0115514	1	0.0353401	1	0.0415495	0.0460673	0.0393137	1	0.0119625	1	0.0172758	1	0.0278891	1	0.0239835	1	0.0353359	1	0.0991538	1	0.0782176	1	0.0939896	1	0.0165451	1	0.0923601	1	0.802051	0.0445657	1	0.0388906	1	0.0483728	0.043943	0.0376446	FALSE
Vps41	0.0833623	1	0.0144601	1	0.019426	1	0.0724471	1	0.0345703	1	0.0870584	1	0.118739	0.00361338	0.0544163	1	0.0233599	1	-0.000190436	1	0.0296522	1	0.023454	1	0.19428	1	0.0376327	1	-0.133858	1	0.338659	0.0937277	1	0.0341463	1	0.00388797	0.0439207	0.0755706	FALSE
Eefsec	-0.0196107	1	-0.0343691	1	-0.000192781	1	0.049795	0.330062	0.0200952	1	0.0352816	1	0.047606	1	0.00434699	1	0.0616716	1	0.0287704	1	0.102894	1	-0.00283369	1	0.150869	1	0.0583485	1	0.156128	1	0.994391	0.0514859	1	0.0302631	1	0.0500109	0.04392	0.0198155	FALSE
Mindy1	0.0358601	1	-0.0764391	1	0.0431441	1	0.0416996	1	0.00681232	1	0.0409456	1	0.072216	1	-0.0120169	1	0.0153977	1	0.17418	1	0.0363575	1	0.104133	1	0.11783	1	-0.0316306	1	0.0902697	1	1	0.0883571	1	-0.0153834	1	0.0587781	0.0439173	0.0494879	FALSE
Prkd3	0.0686171	1	0.10182	0.00369167	0.0444284	1	0.0185768	1	0.0405738	1	0.0879031	1	0.0367471	1	0.0172707	1	0.0222447	1	-0.0413331	1	-0.00589439	1	0.0667723	1	-0.00241841	1	0.12065	1	0.0827944	1	1	0.0160379	0.341896	0.0548839	1	0.0608286	0.0439168	0.040334	FALSE
Ulk1	0.0206783	1	0.0204622	1	0.0351971	1	0.0234689	1	0.0754075	1	0.0231113	1	0.0058645	1	0.00946125	1	-0.00350081	1	-0.0257393	1	0.0409565	1	0.144774	1	0.0539228	1	0.00742131	1	0.22706	1	1	0.0156391	1	0.0307418	1	0.0853282	0.043903	0.0211294	FALSE
[truncated: 6,812 more rows]
